# Supplementary material for: Characterization of Continuous Transcriptional Heterogeneity in High-Risk Blastemal-Type Wilms’ Tumors Using Unsupervised Machine Learning
Source: Int J Mol Sci. 2023 Feb 9;24(4):3532. doi: 10.3390/ijms24043532 (PMC9965420; doi:10.3390/ijms24043532)
Supplement: Supplementary file 1 [file ijms-24-03532-s001.zip]

Archive with 11 entries (11 files):
- ijms-2132028-supplementary figures.pdf
- ijms-2132028-supplementary tables legend.pdf
- Table S1 - geneExpression_dkfz_arcs.xlsx
- Table S2 - integrated metadata.xlsx
- Table S3 - selected genes for heatmap.xlsx
- Table S4 - GO enrichment stromalArc.xlsx
- Table S5 - GO enrichment epithilialArc.xlsx
- Table S6 - GO enrichment blastemalArc.xlsx
- Table S7 - GO enrichment topic1_epi.xlsx
- Table S8 - GO enrichment topic2_stromal.xlsx
- Table S9 - GO enrichment topic3_blastemal.xlsx
