# Supplementary material for: Characterization of Continuous Transcriptional Heterogeneity in High-Risk Blastemal-Type Wilms’ Tumors Using Unsupervised Machine Learning
Source: Int J Mol Sci. 2023 Feb 9;24(4):3532. doi: 10.3390/ijms24043532 (PMC9965420; doi:10.3390/ijms24043532)
Supplement: Supplementary file 1 [file ijms-24-03532-s001.zip › Table S1 - geneExpression_dkfz_arcs.xlsx]

## Sheet: __ Table S1 - geneExpression_dk
Gene symbol	GSM1287918_dkfz1079_CEL_gz	GSM1287919_dkfz1080_CEL_gz	GSM1287920_dkfz1081_CEL_gz	GSM1287921_dkfz1082_CEL_gz	GSM1287922_dkfz1083_CEL_gz	GSM1287923_dkfz1084_CEL_gz	GSM1287924_dkfz1085_CEL_gz	GSM1287925_dkfz1086_CEL_gz	GSM1287926_dkfz1087_CEL_gz	GSM1287927_dkfz1088_CEL_gz	GSM1287928_dkfz1089_CEL_gz	GSM1287929_dkfz1090_CEL_gz	GSM1287930_dkfz1091_CEL_gz	GSM1287931_dkfz1092_CEL_gz	GSM1287932_dkfz1093_CEL_gz	GSM1287933_dkfz1094_CEL_gz	GSM1287934_dkfz1095_CEL_gz	GSM1287935_dkfz1096_CEL_gz	GSM1287936_dkfz1120_CEL_gz	GSM1287937_dkfz1122_CEL_gz	GSM1287938_dkfz1124_CEL_gz	GSM1287939_dkfz1127_CEL_gz	GSM1287940_dkfz1129_CEL_gz	GSM1287941_dkfz1130_CEL_gz	GSM1287942_dkfz1133_CEL_gz	GSM1287943_dkfz1134_CEL_gz	GSM1287944_dkfz1135_CEL_gz	GSM1287945_dkfz1136_CEL_gz	GSM1287946_dkfz1138_CEL_gz	GSM1287947_dkfz1139_CEL_gz	GSM1287948_dkfz1140_CEL_gz	GSM1287949_dkfz1141_CEL_gz	GSM1287950_dkfz1142_CEL_gz	GSM1287951_dkfz1144_CEL_gz	GSM1287952_dkfz1146_CEL_gz	GSM1287953_dkfz1149_CEL_gz	GSM1287954_dkfz1154_CEL_gz	GSM1287955_dkfz1158_CEL_gz	GSM1287956_dkfz1160_CEL_gz	GSM1287957_dkfz1224_CEL_gz	GSM1287958_dkfz1225_CEL_gz	GSM1287959_dkfz1226_CEL_gz	GSM1287960_dkfz1227_CEL_gz	GSM1287961_dkfz1242_CEL_gz	GSM1287962_dkfz1243_CEL_gz	GSM1287963_dkfz1244_CEL_gz	GSM1287964_dkfz1245_CEL_gz	GSM1287966_dkfz1248_CEL_gz	GSM1287969_dkfz1252_CEL_gz
A1CF	6.36319	6.2306	5.92235	7.86402	6.09852	5.8335	6.27495	9.60006	6.07658	6.47825	5.77419	5.835	6.29706	6.28816	6.03278	6.20163	5.77105	5.92121	8.39207	5.78625	5.74052	5.97933	5.85931	5.84702	5.6944	6.07438	5.94183	5.83056	6.06628	6.01773	9.67136	5.62679	5.95683	5.67101	5.83333	5.70452	5.69886	5.54779	5.97928	7.76896	6.09565	5.75452	6.17913	6.40746	7.06392	5.8563	5.87819	6.69418	6.4327
A2M	11.6425	12.5801	11.8935	12.2046	10.357	11.8123	8.32519	11.8742	12.0166	12.134	12.3162	11.6644	12.4235	12.5517	12.4743	8.88927	7.60702	10.0672	10.6156	11.4885	11.0687	12.9658	10.2117	7.88846	12.0093	11.1818	9.04141	10.8049	12.8159	12.6991	12.0078	10.4155	9.1851	11.7604	12.3526	11.0897	11.6063	11.1591	12.7963	12.4172	5.30233	8.726	9.17287	10.1185	8.75569	11.9522	10.5801	11.7002	9.46158
A4GALT	6.95961	6.73235	6.41703	6.33521	6.42696	6.34764	6.64994	7.07068	6.56658	6.75644	6.43259	6.38565	6.73825	6.63107	6.48197	6.47099	6.43174	6.48323	6.97363	6.56208	6.31079	6.50807	6.51773	6.81186	6.63496	6.72649	6.90018	6.46338	6.56486	6.55589	7.16549	6.52607	6.60855	6.37781	6.33406	6.57282	6.48296	6.32453	6.18284	6.87143	6.50831	6.38524	6.64973	6.47889	6.82008	6.45648	6.57461	6.67943	6.43424
A4GNT	5.43259	5.58183	5.32754	5.45809	5.51707	5.20977	5.62292	5.40984	5.50029	5.5012	5.29779	5.39595	5.31778	5.44768	5.51574	5.61418	5.44845	5.55189	5.49454	5.30521	5.22732	5.13842	5.40563	5.46605	5.20351	5.51094	5.59648	5.16779	5.30743	5.32092	5.53468	5.37524	5.42676	5.29486	5.40713	5.2709	5.45731	5.39277	5.08242	5.61616	5.34819	5.4382	5.45451	5.41238	5.61433	5.38349	5.42676	5.64036	5.76543
AAAS	6.86065	7.06616	6.77845	6.83015	7.03857	6.71521	7.13007	7.04275	6.67187	6.9231	6.80832	6.91959	6.74618	6.93257	6.84933	6.82208	6.86992	7.04514	6.95731	6.95833	6.69954	6.59141	7.09458	7.39456	6.92261	7.16892	7.35498	7.08921	6.56486	6.77078	6.91165	7.0181	7.28439	6.95198	6.69068	6.79228	6.76563	6.79158	6.48588	6.8599	7.23062	6.73578	7.18308	7.16033	7.02271	6.86296	7.03056	6.97031	7.2676
AACS	8.24263	7.62028	8.33851	8.30139	8.54552	8.61357	8.72369	8.11805	8.15848	7.65139	8.10069	8.31511	7.68399	7.51479	7.37729	8.305	8.61641	8.51755	8.43853	8.9665	9.06106	8.16224	8.66924	8.11986	8.43035	8.65067	8.76272	8.82952	8.3624	8.33798	8.7221	8.62663	8.58161	9.14721	8.5867	8.94602	8.9031	8.39549	8.50981	7.8285	8.68155	8.63736	8.64555	7.7178	8.2605	8.81757	8.81782	8.51117	7.92935
AADAC	4.82577	4.80671	5.16896	4.72961	4.75942	4.61021	4.71638	4.58293	4.95269	5.15767	4.7583	4.66891	4.3854	4.63707	4.8173	4.42712	4.69681	4.78928	4.58293	4.81431	4.5973	4.61331	4.8108	6.55118	4.7442	4.83906	4.69397	4.60909	4.64978	4.87978	4.79779	4.73912	4.72932	4.80703	4.54169	4.84204	4.7442	4.91297	4.47776	4.75165	4.88276	4.86757	5.16406	4.85147	4.82848	4.82611	4.65725	5.08149	5.0839
AAGAB	8.2021	7.86106	7.53375	6.92055	8.51504	8.0948	9.28711	7.96825	8.0359	8.11762	7.95628	8.18194	8.04667	8.03459	8.02473	8.66889	8.82164	8.48275	7.83793	6.9744	8.15872	7.12173	7.54692	7.55462	8.36525	8.27023	7.52545	8.09125	7.42848	7.54073	7.99924	7.887	8.4417	8.19765	7.28588	7.46966	7.43801	7.4559	7.69001	7.33498	8.76602	8.32188	8.76832	7.80661	7.86636	8.46568	8.15532	7.63717	7.90484
AAK1	9.11604	9.77133	8.64516	9.10502	8.32758	9.12761	8.65823	9.33447	9.32326	9.54645	9.39477	9.31283	9.61857	10.1335	9.75694	8.56522	8.06863	8.60863	9.34497	9.00721	8.54122	9.42942	8.99748	7.81138	8.96713	8.44699	7.72537	9.41777	9.00081	9.18351	9.52483	8.60645	7.88771	9.4523	9.08869	9.17161	9.39183	8.84165	9.01781	10.084	8.52284	8.45868	7.63617	8.50955	7.73614	9.43305	9.21439	9.522	8.58971
AAMDC	8.29877	8.41546	8.66854	8.72362	7.95334	8.25367	8.22868	8.56155	8.45771	7.83176	8.35738	8.13045	8.40015	8.38654	8.30617	8.19637	8.42406	7.4793	8.75199	8.51497	7.60033	8.29518	8.02723	8.15277	8.4108	7.52925	8.43731	8.19191	8.39669	8.28191	8.71728	8.45191	7.85393	8.20639	8.50032	8.6135	8.7183	8.36213	8.01553	8.32675	7.48827	8.35575	8.79092	7.86284	7.35882	8.81024	8.15045	8.14525	8.39592
AAMP	8.98641	8.76221	9.13333	8.89782	9.25598	9.08151	9.28019	9.10458	8.732	8.81724	8.62255	8.71826	8.84348	8.92796	8.94083	8.9052	9.07745	8.80949	8.91135	9.12212	8.77235	8.59129	8.83237	8.91267	8.71929	8.80271	9.02724	9.08412	8.81332	8.77942	9.0452	8.70444	9.39856	8.64927	8.78857	8.97972	8.96726	8.89317	8.75546	8.71205	9.20492	8.91908	9.12094	8.69644	8.24211	9.02375	8.95821	9.16125	8.75806
AANAT	5.06266	4.92925	4.85516	4.7239	4.95109	4.96005	4.95109	5.00972	4.9098	5.2229	4.8237	4.84782	5.15838	4.83954	5.09479	4.58077	4.79777	4.76077	5.1566	4.87412	4.95109	4.63807	4.91279	4.91121	4.9468	4.82223	5.31549	5.06019	4.70576	4.84168	5.14974	4.87977	4.9863	4.85775	5.02709	4.74814	5.10818	4.76323	4.70284	5.04213	5.19493	4.9616	5.50336	5.17249	5.78902	4.88924	5.1101	5.41579	4.94029
AAR2	7.90162	7.78023	8.67787	7.95941	8.26114	7.99246	8.11365	7.7854	7.85449	7.64576	7.82069	7.82786	7.63166	7.71008	7.77963	7.80141	8.1252	8.02207	8.03265	8.39645	8.51583	7.71649	8.30821	8.27826	7.97155	8.78603	8.53932	8.42618	8.15737	8.01884	7.85446	8.47894	8.25605	8.03585	8.14069	8.01253	8.5944	8.68692	8.25842	7.76095	8.51033	8.18507	8.27221	8.06497	8.12403	8.10264	8.19349	7.69021	7.60834
AARS	9.23261	9.35705	9.44807	9.3665	8.68168	9.5229	9.5941	9.42282	9.28591	9.09147	9.4553	9.29294	9.20857	9.25809	9.26284	8.93674	9.48051	8.73739	9.37783	9.24995	9.53359	9.15215	9.15706	8.50983	8.96031	9.5929	8.51481	9.47714	9.16031	9.49845	9.64915	9.2032	8.73227	8.91712	9.37034	9.44687	8.96572	9.67232	9.38155	9.26679	9.23864	9.67894	9.17273	8.28647	9.25863	9.62933	9.40446	9.67111	8.72973
AASDHPPT	10.1026	10.3664	10.5262	10.8791	11.4374	9.93293	11.4446	10.7347	10.1482	10.0982	10.6471	10.6863	10.2533	10.3024	10.1589	11.2893	10.3994	11.3145	10.91	11.356	10.5413	10.5233	11.4129	11.1296	10.7634	10.5374	11.6271	11.4285	10.6836	10.5694	10.5704	11.4907	11.9165	11.0798	10.9257	10.9405	11.1136	10.659	10.9616	10.7877	11.5122	11.4621	11.5181	11.4132	11.7988	11.3768	11.4204	10.716	11.2806
AASS	6.93685	6.69409	8.6836	8.51144	8.2469	8.2451	7.4725	9.13987	8.04999	7.33853	8.82122	8.39318	6.49363	6.88906	7.12932	8.11451	8.72659	8.75411	8.31185	8.97532	8.80054	8.75598	9.36093	8.90341	8.26636	7.52371	7.16712	8.64868	8.728	8.5603	8.69186	8.38302	8.65157	7.32592	8.88976	9.2549	9.02512	7.94145	8.89645	8.58314	7.37295	8.56362	8.15374	8.91712	7.4857	6.37243	8.80296	7.50177	8.49461
AATF	8.89967	8.8628	8.73194	8.65936	9.31338	8.98907	9.14956	8.9163	8.84297	8.82921	8.24766	8.54323	8.68102	8.84362	8.87906	8.6788	9.52313	8.42422	8.7634	8.36654	8.88031	8.67703	7.9079	9.22496	8.16538	8.74426	9.34072	8.42404	8.63973	8.79457	8.73489	8.29511	9.01284	8.1424	8.68977	9.19838	9.26977	8.7676	8.64578	8.60977	8.85657	8.48141	7.76408	8.1802	8.66921	9.07859	8.77436	9.06898	8.78013
AATK	8.05563	8.06202	7.5258	7.69219	7.59151	7.67045	8.27882	7.96714	8.08791	8.46041	7.95258	7.97783	8.06672	7.93088	8.22829	7.62239	7.78228	7.72678	7.87371	7.88634	7.60685	7.01025	7.81661	7.49402	7.85079	7.85725	7.51165	7.60364	7.73939	7.60484	7.76909	8.04947	7.70638	7.64943	7.89068	7.14006	7.37619	7.91671	7.49564	7.21569	8.16342	8.2958	8.02395	7.44849	7.80415	8.16654	8.34944	7.81261	8.39183
ABAT	8.07588	8.2779	9.6245	9.3539	9.43399	8.55716	10.9911	12.8417	7.73654	7.58453	8.89614	9.22417	7.99779	8.30322	7.82502	11.3147	9.82724	9.80321	10.96	10.5066	10.0575	8.69892	10.082	11.0986	9.17564	11.3419	9.79761	10.6431	9.03259	8.62002	12.0658	9.72948	10.9081	9.52149	9.4767	9.1769	8.97734	8.66888	9.89752	11.0929	10.482	9.60682	9.69501	9.25777	9.53412	10.1898	10.0906	8.16251	9.80014
ABCA1	10.9306	11.4941	10.5628	10.572	8.28167	10.1523	8.54514	9.73709	10.6222	11.5092	10.6172	10.7714	11.6897	11.7642	11.3021	9.21181	8.07478	7.85483	9.04781	9.9282	10.0092	10.7573	9.78364	8.21966	10.914	8.77633	8.72218	9.62973	10.7537	10.8316	8.39152	8.43758	7.49127	10.4747	10.0277	9.36395	9.51022	10.0602	11.1383	10.5742	6.94935	9.77681	7.85599	8.19738	8.96905	10.0879	9.33805	8.16892	9.6438
ABCA11P	5.03107	5.61214	8.02297	8.05367	7.61962	7.54461	7.86874	6.53841	7.24991	4.92867	7.65579	7.82554	5.19665	5.65009	6.3364	8.47369	7.44335	7.4817	7.72336	8.13991	7.63463	7.41696	8.15908	7.85137	7.46389	7.45233	8.00195	8.07119	7.32275	7.01131	6.18896	7.70374	8.23428	7.21669	7.56776	7.3422	6.82545	7.45249	7.30797	7.03697	8.14643	7.65035	8.50896	7.4141	7.7248	7.19292	8.01878	5.85161	7.38908
ABCA12	3.31501	3.54275	3.51367	3.44942	3.98731	3.56643	3.70159	3.67497	3.4143	3.47818	3.48403	3.47795	3.5257	3.48818	3.43817	3.61769	3.89301	3.45623	3.56685	3.45336	3.59321	3.45883	3.37963	3.48126	3.58131	3.53785	3.60969	3.50237	3.46067	3.3372	3.57199	3.41179	3.57216	3.54815	3.56674	3.42291	3.44081	3.35378	3.49002	3.56659	3.64662	3.45972	3.60724	3.60171	3.90761	3.46688	3.56451	3.47641	3.62303
ABCA2	7.29621	6.94406	7.17311	6.97808	7.2403	7.04481	7.39729	7.16	7.27264	7.37293	6.9453	7.18789	7.10157	7.16703	6.97463	7.2545	7.46656	7.14724	7.422	7.11926	7.62555	7.03281	7.35314	7.21309	7.26424	7.44743	7.22175	7.32904	7.05519	7.06283	7.14943	7.2782	7.03762	7.26211	7.40468	7.1908	7.25154	7.64241	7.24333	7.26744	7.83044	7.40493	7.40869	7.33023	7.67634	7.38683	7.43564	7.31693	7.53061
ABCA3	6.8269	6.72618	6.79079	6.48228	6.79638	6.68575	7.26939	6.81695	6.51211	6.81635	6.75818	6.48453	6.7358	6.65944	6.66955	6.98465	6.54335	6.97622	6.7242	6.59881	6.74582	6.67204	6.91367	6.71397	6.72825	7.24448	6.59317	7.23356	6.89097	6.85357	7.12902	7.07823	7.28579	6.66245	6.84212	6.97403	7.39602	7.2576	6.80398	7.22507	7.23289	6.67763	6.65615	6.7232	6.67642	6.99229	6.97526	7.24465	7.05169
ABCA4	5.48273	5.63142	5.26354	5.72302	5.45598	5.5018	5.50612	5.77998	5.70001	5.64	5.19831	5.3969	5.55846	5.51497	5.58503	5.87062	5.46367	5.59144	5.82078	5.35363	5.149	5.31755	5.37188	5.19479	5.38489	5.65475	5.4521	5.21342	5.15983	5.70838	6.32854	5.20901	5.35782	5.14397	5.27413	5.57136	5.43388	5.18483	5.09137	5.61916	5.60586	5.74749	6.14418	5.74054	6.18896	5.81114	5.47117	6.29369	5.67143
ABCA5	6.00026	7.37829	8.07083	6.98148	7.86775	7.13868	7.48817	8.80416	7.29252	6.46093	8.65064	9.34518	6.57687	7.17483	6.8551	7.94998	8.73051	7.87006	8.52216	9.40204	7.59994	7.92696	9.40542	8.33124	9.03765	6.52854	8.01822	7.96341	7.94373	7.34274	9.04295	5.78362	6.46019	9.29822	8.34929	7.73425	7.42003	6.46486	8.36035	8.29741	7.55692	9.006	8.03744	9.20627	7.40229	7.92148	9.2398	7.32052	8.54958
ABCA6	6.60534	5.9502	9.01579	5.11482	4.70316	7.68009	4.61126	6.14222	8.71392	5.39736	5.89448	6.40081	5.92784	6.38543	6.45323	4.79073	4.40259	4.8575	5.76628	5.90371	6.29507	7.54887	5.21401	4.75487	5.2907	4.83976	4.6408	6.36943	8.28859	6.67089	6.10187	5.99684	4.28442	5.3373	5.87714	5.40112	4.60438	4.50888	6.57502	6.20764	4.92065	4.34914	5.07934	4.5884	4.9448	4.49019	5.08366	4.70798	4.26294
ABCA7	7.14199	7.46441	7.0853	6.98966	6.69502	7.01767	7.46256	7.45748	7.2641	7.43033	7.14511	7.17061	7.43635	7.60233	7.4529	7.1264	6.99879	6.89212	7.51433	7.18236	6.93638	7.49041	7.43625	7.26328	7.40267	7.2946	7.51391	7.19619	7.29247	7.48278	7.30777	7.17996	7.07208	7.0772	7.26328	7.07005	7.4842	7.28715	7.62179	7.64659	7.35867	7.36035	7.18518	6.95379	7.3053	7.324	7.2236	7.75788	7.03601
ABCA8	8.77867	7.70856	9.78781	8.37991	4.14707	8.2458	3.79985	8.71789	9.51065	3.92774	6.4894	7.21111	6.95921	7.37916	7.06284	4.23629	8.25627	5.21914	8.85349	7.58754	7.43336	9.79311	6.5722	3.88763	6.29196	5.81266	5.39383	5.13662	9.69203	7.02047	9.00785	5.28825	3.68718	7.81778	7.16953	8.65717	4.23678	5.48188	8.21142	8.94125	4.26806	8.56346	4.64483	6.95755	6.60955	4.09874	7.35484	7.18762	7.57329
ABCB1	5.73851	6.74086	5.58154	9.79927	7.67115	5.58855	4.52745	9.95811	6.03955	5.35309	5.95783	5.57176	6.89554	6.85921	6.9629	4.60057	8.60699	5.73822	7.47283	4.77859	6.25076	8.38404	4.56382	8.02195	5.20532	6.27493	8.55177	5.24853	7.6432	8.66206	9.59644	4.46726	6.80693	5.41332	6.6182	9.15395	6.12092	5.57285	7.27827	8.5206	4.30691	7.02781	4.7315	7.41514	8.90621	9.90992	4.23614	6.89359	9.10966
ABCB11	5.07101	5.18947	5.1253	5.06533	5.05766	5.10021	5.07101	5.14276	5.23832	5.45759	4.68698	4.94972	5.47547	5.42933	5.47578	4.74954	5.10153	4.96748	4.92776	4.95456	4.93664	4.94844	5.07101	4.96047	5.02484	5.10303	5.29967	4.97542	4.83886	5.3339	5.27754	4.95767	5.0744	5.05493	4.79312	5.03489	4.97855	4.76688	5.06828	5.02689	4.88226	4.84188	5.09472	4.95662	5.59815	5.20145	4.93449	5.1344	5.05003
ABCB4	5.14478	5.23193	4.79163	6.11735	7.33514	5.99537	7.04649	5.64264	4.98698	5.20809	4.69345	4.6469	5.67569	4.98638	5.10404	6.52909	6.87735	6.86413	5.60051	4.46364	5.50533	5.51332	4.57383	6.24924	4.38282	5.61076	6.16142	4.85378	5.45309	5.2792	5.01669	5.14478	6.63105	4.56259	5.36351	5.39718	8.66063	5.02891	6.04023	6.13059	4.67104	7.55652	4.76771	6.46761	6.82762	5.31888	4.36092	5.87886	6.40313
ABCB6	6.67743	7.12217	7.06951	6.78848	6.31002	7.59946	6.61594	6.84012	6.92028	6.99219	6.48609	6.43871	6.56649	6.14743	6.55647	5.93067	6.16822	5.89245	6.74003	6.26131	6.4743	6.3406	6.4723	6.41431	6.08387	6.76275	6.34612	6.59381	6.50566	7.1859	6.85482	6.5604	6.89168	6.20491	6.55852	6.86562	6.29904	6.84791	6.66871	6.42888	6.60511	6.32072	6.40219	5.92519	6.2995	7.07743	6.31764	6.20786	6.61832
ABCB7	8.78701	9.04311	8.89934	9.04432	9.52109	8.81877	9.26651	9.25254	9.24656	9.27417	8.82196	9.18131	9.12135	9.23001	9.05017	9.7238	9.69588	9.59565	8.9187	9.07251	8.82757	9.26771	9.08553	9.62746	8.94758	9.15523	9.70141	9.52823	9.11441	8.88816	9.15163	8.70768	9.69395	8.71063	8.91994	8.93619	8.8527	8.44748	9.09668	8.93004	8.91758	9.13105	9.47116	9.31306	9.25257	8.57902	8.97681	8.43427	9.07892
ABCB8	6.33689	6.18405	5.97856	5.94159	6.24709	6.07739	6.27459	6.30782	6.15687	6.4192	5.95654	6.18879	6.11482	6.23111	6.03438	6.3849	6.15361	6.31521	6.15361	6.26252	5.95586	5.80197	6.41768	6.50843	6.04329	6.34488	6.30062	6.12319	6.18879	6.18756	5.91302	6.17368	6.36293	6.08734	6.10281	5.93514	6.08479	6.07285	5.84388	6.04836	6.15361	6.07241	6.31555	6.08161	6.11446	6.14049	6.1588	6.49198	5.9506
ABCB9	5.81066	5.80303	5.77248	5.64228	5.59835	5.66042	5.81108	5.82749	5.80295	5.96761	5.79051	5.73721	5.81042	5.70856	5.68395	5.35248	5.64231	5.6729	5.75599	5.81845	5.65616	5.38112	5.85042	6.06553	5.74029	5.79545	6.02855	5.56532	5.57829	5.74916	6.02203	5.95461	5.67578	5.60756	5.60936	5.52749	5.79002	5.63815	5.48916	5.48528	5.78931	5.32263	5.46522	5.82433	6.04389	5.7074	5.4457	5.91929	5.67917
ABCC1	9.0818	9.06158	8.59386	8.67667	9.08131	8.7368	9.87604	7.83697	9.00324	9.36829	8.69357	8.85278	9.08745	8.74553	8.96832	9.71008	9.0303	8.98086	8.48212	8.71657	9.43729	9.06644	8.72679	9.48398	8.47863	8.39368	9.73666	8.93065	8.79784	9.12848	8.01169	8.92947	10.2387	8.79561	8.58768	8.13042	8.74875	8.60122	8.50207	8.62227	8.47496	8.72401	7.60388	8.50001	8.71569	9.07868	9.16124	7.65468	8.04752
ABCC10	8.3584	8.97061	8.72854	9.26996	8.7651	9.18663	9.2276	7.9459	8.86565	8.37831	8.96548	9.34046	8.87025	9.06204	8.89526	8.72596	9.35304	8.78185	8.76155	9.35735	8.59097	8.92482	9.76841	9.47473	9.1548	9.17369	8.86538	9.62361	8.94637	9.01347	7.97258	9.57124	8.56158	9.00466	8.55501	8.88807	8.73543	8.71973	8.85773	8.57163	8.71948	9.31682	8.18025	8.21186	8.25358	9.18915	9.11449	7.61765	8.45435
ABCC2	4.83555	4.79115	4.57926	4.75008	4.78426	4.74265	4.47369	7.08791	4.81564	4.71494	4.55432	4.58878	4.91922	4.81059	4.71392	4.60189	4.54463	4.73159	5.2161	4.62765	4.29684	4.4069	4.64907	4.64459	4.51468	4.63081	4.99271	4.55988	4.64605	4.67883	6.07413	4.31325	4.71785	4.46827	4.59663	4.38243	4.48236	4.4188	4.74799	5.48855	4.70491	4.63943	4.66878	4.69254	4.87393	4.52532	4.47752	4.97578	4.83027
ABCC3	6.55368	6.99283	6.35115	6.2813	6.55737	6.86447	6.47244	7.02425	7.21665	7.45667	6.40619	6.70403	7.63433	7.75382	7.16205	7.15919	6.68225	6.25377	7.09766	6.42838	6.39262	7.2379	6.51638	6.53203	6.64906	6.69558	7.01541	6.23261	6.83664	7.18605	6.99357	6.64143	6.42249	6.55175	6.57022	7.17053	6.76336	7.06629	6.73338	7.28631	6.49177	6.67618	6.75151	6.02549	6.61077	6.48571	6.29886	6.78914	6.79247
ABCC4	7.91718	7.84159	7.8355	7.77626	8.5469	8.76846	8.99763	8.87005	7.45043	6.77412	7.07168	6.78189	7.83118	7.51172	7.29588	10.1703	7.47558	7.60013	8.3388	6.84367	8.78155	9.45727	6.61089	7.81238	6.54276	7.99015	8.58046	6.1134	8.53494	7.70528	9.25837	7.47668	8.8095	7.32586	7.7674	7.91099	10.3008	8.6416	8.51178	8.55489	8.62728	9.23676	8.6903	7.53018	9.69154	7.80785	6.8612	9.27833	7.92945
ABCC5	7.1043	9.5543	8.53457	8.24643	8.31428	8.42021	9.24871	8.07562	8.88132	8.54628	8.98164	9.13905	8.96031	9.92705	9.18226	7.88883	7.78694	8.3383	8.05097	8.67888	8.30069	9.00898	8.78606	8.93302	8.47025	8.32713	8.43685	9.44629	8.75592	8.44741	8.48482	8.51992	8.86732	8.81331	8.11724	7.88524	7.84539	7.95918	9.02836	8.616	8.40098	8.25286	7.62243	8.24553	7.9568	8.21637	8.31164	7.77879	8.37336
ABCC6	5.69886	5.64266	5.67699	5.96961	5.60405	5.69629	5.70528	6.38694	5.65256	5.67322	5.59562	5.74122	5.83965	5.79251	5.82985	6.0853	5.61644	5.7804	6.04092	5.79378	5.44748	5.53306	5.92599	6.1015	5.76456	5.71496	6.15586	5.62259	5.61179	5.73067	6.56416	5.92895	5.7804	5.98694	5.74384	5.72328	5.44548	5.82319	5.56438	5.86418	5.90535	5.83698	6.2362	5.5736	5.76772	5.4482	5.58289	5.93168	5.70986
ABCC8	6.50714	6.0716	6.79251	6.46427	8.39006	6.35659	7.34762	6.28607	6.45134	6.3543	6.30876	6.41181	6.38366	6.30641	6.23231	6.45202	7.38445	6.88016	6.79118	6.47924	6.42427	5.99097	6.61592	8.00784	6.41551	7.27686	8.26087	6.3976	6.46046	6.29941	6.28036	6.4293	6.30812	6.58039	6.72406	6.15357	6.20646	6.62637	6.07567	6.39875	7.85626	6.74253	7.00514	8.12397	7.59037	6.6331	6.69657	6.52986	7.68821
ABCC9	5.74722	6.30337	6.48454	7.33194	5.4727	6.09762	5.96109	5.12299	6.172	5.89761	6.47532	5.36079	5.27413	5.21479	5.83661	4.95285	4.85426	5.57574	5.1409	6.61875	5.8153	5.90959	5.15826	5.18475	5.54352	5.11761	5.21408	5.78646	5.86837	6.67045	5.12747	5.34041	4.88064	5.91938	6.48796	6.02905	4.8075	5.32068	5.33654	5.37934	4.73275	5.28077	5.09224	5.73992	5.32238	4.9756	5.26043	5.07308	4.86783
ABCD1	7.17261	7.17912	6.62496	6.71302	6.85119	6.79398	6.93305	6.98489	7.08575	7.13896	6.6201	6.75798	7.13345	6.99658	7.024	7.10169	6.85019	6.76452	7.04728	6.94977	6.65081	6.60082	6.93152	6.99335	6.78309	7.2323	7.08043	6.86913	6.70548	6.96055	7.16431	6.76402	6.77944	6.75102	6.73229	6.67834	6.70661	6.89641	6.55512	7.21142	7.10516	6.7805	7.12003	7.25279	7.17032	6.97959	7.15397	6.85054	7.00368
ABCD2	3.26958	3.35132	3.16123	3.10153	3.02206	3.26494	3.16716	3.26346	3.14135	3.07987	3.1706	3.03351	3.20497	3.28353	3.22519	3.03114	3.01211	3.16309	3.2585	2.99463	3.07611	3.17466	3.05824	3.12241	3.16501	3.1706	3.21388	3.12301	3.15854	3.32243	3.14272	3.03976	3.1503	3.09877	3.14846	3.25867	3.18574	3.13342	3.21939	3.46495	3.13511	3.24594	3.68977	3.09352	3.55741	3.21845	3.33529	3.18221	3.22786
ABCD3	9.73935	10.14	10.4301	10.7419	10.3446	10.198	10.4122	11.7804	9.82803	9.45973	10.3847	10.0318	9.86428	10.227	10.0043	11.4622	10.7113	10.4122	11.0364	10.2654	10.9244	10.49	10.3462	10.1481	9.95419	10.6509	10.6311	11.2099	10.4373	10.3353	11.6269	9.86857	11.4363	10.4484	10.3374	10.5605	9.83845	10.0409	10.4646	10.8703	9.90192	10.7239	10.5076	10.486	10.3567	11.0599	10.4097	10.3266	9.96072
ABCD4	7.76896	8.75404	8.56078	8.79367	8.71211	8.22456	8.1284	8.64065	8.3818	7.98285	8.60181	8.82431	8.42056	8.87371	8.23427	9.17059	8.72659	8.47771	8.90117	8.97212	8.60281	8.58262	9.20095	9.21834	8.90305	8.87525	9.17202	8.80698	8.86071	8.46385	8.47762	8.64386	8.03966	8.86573	8.73123	8.47876	8.62044	7.79202	9.14139	8.65774	8.91633	8.72417	9.04721	8.59728	8.24705	8.09302	8.7936	7.99131	8.61188
ABCE1	9.35428	9.0439	9.37579	9.19307	9.75223	9.55471	9.37022	8.76946	9.02956	9.63725	9.35415	9.50315	8.96557	8.77647	9.59681	9.4532	9.68083	9.74558	9.02631	9.09854	9.76993	9.16222	9.34178	9.52066	9.33287	8.24029	9.91474	9.45566	9.25257	9.37549	9.02091	10.1812	10.8922	9.41397	9.29671	8.87254	8.77036	8.56069	9.18378	8.36886	8.61178	9.18893	9.39922	9.3187	9.69599	9.36027	9.14694	8.5419	8.99972
ABCF1	9.04213	8.58893	8.53062	9.05854	9.22904	9.18899	9.08286	8.61004	8.62824	8.92172	8.39604	8.75305	8.67571	8.71755	9.06925	7.9242	8.91906	8.75282	8.72136	8.65866	8.75349	8.53976	8.57716	9.37851	8.93685	9.34208	8.88184	8.95595	8.65377	8.78628	8.88146	9.03506	9.69664	8.54453	8.73309	8.39738	8.5835	8.57209	8.55091	8.52194	9.31256	8.85203	8.20813	8.86695	8.71277	9.12234	8.93047	8.03342	8.74808
ABCF2	7.83631	7.57475	7.26897	7.02431	7.87867	7.90966	7.87867	6.89071	7.43334	7.48259	6.94957	7.51751	7.52866	7.2684	7.52133	7.23958	7.61254	7.80061	7.23897	7.56127	7.7406	7.18433	7.63337	7.47447	7.26256	8.10121	7.16884	7.73799	7.23419	7.67682	7.25004	7.98363	8.96255	7.77002	7.33709	7.41649	7.10436	7.48628	7.42329	7.02409	7.52142	7.43041	7.57159	7.32426	7.47543	6.61959	7.75725	6.92103	7.67327
ABCF3	7.60917	7.60075	7.6915	7.80327	7.73841	7.64471	7.55377	7.8227	7.63556	7.69937	7.45589	7.53034	7.52842	7.57398	7.57607	7.40465	7.57635	7.47974	7.82037	7.67272	7.3682	7.37284	7.63	7.95155	7.30849	7.9528	7.77876	7.85122	7.4951	7.5683	7.96812	7.68632	7.60917	7.51024	7.51975	7.69421	7.56	7.64435	7.59305	7.58889	7.96194	7.65297	7.55367	7.46446	7.54355	7.71515	7.67251	7.60917	7.37734
ABCG1	10.0041	10.2182	9.65351	8.11226	7.25334	8.24325	5.4738	7.6475	9.62217	9.99993	9.10234	9.1484	10.9405	11.2504	10.2639	7.55193	7.84808	6.49276	7.5322	8.64331	7.93275	9.60079	7.74466	8.16692	9.86944	7.49253	7.16366	7.25761	9.77486	9.16965	7.47668	6.27962	5.78116	8.98225	8.94245	9.046	9.22767	9.45729	10.5329	9.81314	6.2003	9.17974	7.29362	6.51823	7.53376	8.16807	7.4718	8.00016	8.92252
ABCG2	6.627	7.20452	8.23787	8.86089	5.64862	6.37328	5.12799	7.18587	7.31776	7.07597	7.00939	6.02483	7.00639	6.68465	7.09549	5.81885	5.16661	5.88777	6.19628	6.58905	6.40858	7.44023	5.8064	4.85921	6.51848	5.93275	5.38596	6.72007	7.30518	6.46493	6.20491	6.06433	6.30662	6.06722	5.87579	7.92438	7.04792	5.65231	6.86115	6.30777	5.81544	5.70239	6.37049	5.70896	6.386	5.83933	5.82122	6.4935	5.70769
ABCG4	6.43166	6.43642	6.56645	6.36939	6.18672	6.41115	6.63868	6.49816	6.50424	6.82721	6.48244	6.51161	6.69184	6.67868	6.60518	6.59158	6.33284	6.51378	6.6783	6.62146	6.34458	6.35188	6.52549	6.63608	6.54402	6.65822	6.67929	6.34432	6.52404	6.47264	6.49617	6.44289	6.5921	6.48788	6.42725	6.38659	6.35683	6.55136	6.16943	6.41341	6.48592	6.32375	6.52011	6.47126	6.96092	6.53064	6.48023	6.84972	6.67143
ABCG5	4.41526	4.13975	4.26863	4.09917	4.2233	4.13623	4.58109	4.3605	4.09497	4.0589	4.24269	4.16316	4.47928	4.12105	4.1428	4.55367	4.3339	4.13133	5.0187	4.38256	4.15309	4.00489	4.54647	4.27728	4.25997	4.22745	4.37008	4.17903	4.20965	4.20857	4.58109	4.29545	4.33029	4.15442	4.31529	4.22811	4.1165	4.24798	3.97298	4.39033	4.75648	4.54875	4.30861	4.53019	4.98401	4.48799	4.51758	4.51106	4.32582
ABHD10	7.83662	8.95062	9.4111	9.26881	9.35842	8.88024	9.89199	10.3672	8.898	8.57435	9.31587	9.29566	8.67786	8.65407	8.51661	10.2083	9.61932	9.61504	9.93891	9.82842	9.48565	9.12408	9.87069	9.9933	9.46896	8.69557	10.0504	9.74951	9.09661	8.80684	9.87185	9.52119	9.55426	9.29711	9.3034	9.32338	9.68514	9.94655	9.40653	9.1996	9.60425	9.65057	10.2723	9.56992	9.89132	9.65501	9.78286	9.13571	8.9201
ABHD11	7.68239	8.12003	8.09478	8.69026	8.6663	8.34874	8.52537	8.60845	8.18152	8.06834	8.23933	8.34054	8.08047	8.33439	8.08044	9.08154	8.70052	8.28219	8.93889	8.34913	8.03841	8.42106	8.52073	8.72351	8.6375	8.46615	8.04503	8.25694	8.70367	8.0382	8.92534	8.10784	8.37333	8.46794	8.7296	8.65428	8.88564	8.6482	8.46268	8.23311	8.6945	8.54547	8.87275	8.24953	8.01539	8.38868	8.38561	9.35983	8.83868
ABHD17A	9.17808	9.59637	9.09795	9.44874	8.99269	8.89111	9.05663	8.95409	9.3973	9.31774	9.11719	8.90241	9.20968	9.46475	9.41042	8.65358	8.77241	8.83523	9.31592	9.23229	8.69057	9.06944	8.96364	8.89141	8.90338	9.44617	9.22801	9.13434	9.41724	9.36674	9.00133	9.12715	8.26539	8.99896	9.03579	9.12117	9.34705	9.63601	9.51494	9.19258	9.08502	8.89765	9.08787	8.49453	8.08663	9.13414	9.26023	9.26577	8.84822
ABHD17B	7.05867	6.85098	7.56974	7.37719	7.63014	7.5301	8.06243	7.15071	7.09529	6.9504	7.3491	7.51529	6.83803	6.74489	7.68612	7.31398	7.55395	7.71154	5.82969	6.91853	7.74635	6.43093	6.82886	7.01852	6.61563	5.78968	6.91219	7.35178	6.41518	6.55792	6.18261	7.58439	7.85012	6.55496	6.60846	6.25933	6.42654	6.93435	6.35719	5.92947	6.46469	6.88427	6.50887	6.23377	5.94111	6.43138	6.69058	6.08222	6.27192
ABHD18	5.04841	5.87514	5.89321	6.2383	6.03854	5.54844	6.01048	5.45872	5.74147	5.83538	6.45586	6.09504	5.59901	6.61737	5.88418	5.78439	6.44011	6.25013	5.60928	5.83333	5.63277	5.88741	5.93673	6.02545	5.80948	5.5129	5.41752	5.57227	5.59395	5.79462	5.14769	6.50948	6.37079	6.18555	6.0422	5.68637	6.61715	5.45346	6.11468	6.18797	6.21148	6.55253	5.7456	5.47063	4.51284	6.30565	6.44576	4.90449	6.98111
ABHD2	8.70305	8.80693	9.48947	9.38581	8.39339	8.60401	8.59996	8.488	8.72768	9.2793	8.38555	8.28658	9.26443	9.14784	9.17855	7.46596	8.33248	7.92817	7.62163	8.0967	8.48471	9.04545	7.99053	9.09986	8.94478	8.66601	9.14722	8.26682	8.76309	8.89056	8.36235	8.7789	6.99979	8.41735	8.77218	8.31823	8.63425	8.66288	8.78263	8.25965	7.8023	8.5463	7.06164	6.91668	6.0605	7.9431	7.7555	7.24395	7.49032
ABHD3	9.55866	10.1392	8.58631	8.486	8.66304	9.53407	9.29779	8.85118	9.80638	9.39882	9.28416	9.2753	9.82268	10.4997	9.77638	9.85223	9.26339	8.1788	9.34048	8.41029	9.53566	9.19409	8.73848	8.76931	9.58535	9.28653	8.97533	8.22193	8.95838	9.30298	9.11828	8.08608	8.72058	9.23207	8.32477	8.06265	8.51163	7.86334	9.30951	9.58814	8.59484	8.99902	9.44088	8.37179	8.03356	8.92717	8.98645	7.87491	8.84597
ABHD4	9.01587	9.08596	8.79382	8.98905	8.55737	8.82794	8.25641	9.10755	9.02096	8.9544	8.63076	8.49346	8.83956	8.87253	8.77811	8.38018	8.60585	8.53241	9.05319	8.58964	8.44299	8.68481	8.61809	8.78872	8.84761	8.94923	9.2749	8.4272	8.89903	9.26602	9.26814	8.59471	8.24152	8.32295	8.662	9.08319	8.97845	9.11312	8.55599	8.94049	8.79001	8.77957	8.57527	8.51071	8.91836	9.33925	8.8696	9.30123	8.78872
ABHD5	8.0466	7.43571	6.5806	7.04299	7.37991	6.30153	7.18974	6.75989	7.65942	7.50248	6.65023	7.33584	7.30906	7.05608	8.26372	7.94516	7.88029	7.7105	6.87387	7.42538	7.70849	7.38689	7.17305	7.38612	7.83891	6.27725	6.92453	8.11748	7.0639	7.51279	7.24296	7.19679	6.55497	7.94843	7.84139	7.44232	7.76945	7.63256	7.52981	6.55973	7.74088	7.55764	7.33213	7.287	6.2703	7.11486	7.24671	6.18564	6.99364
ABHD6	7.63674	7.94817	7.22952	7.46767	6.78301	7.21864	7.13418	9.60081	7.55784	7.8381	7.47806	7.27771	7.99783	8.13913	7.85061	6.88062	7.92383	6.93147	7.81155	6.95534	6.7497	7.29032	6.88799	7.15634	7.40073	7.29971	7.73741	7.01486	7.00697	7.52592	8.48227	7.39734	6.95646	7.3412	7.06212	7.93091	8.44928	7.51485	7.68511	8.12796	7.18785	7.56702	6.73918	6.86336	6.45686	6.69588	6.90686	7.87105	6.76683
ABHD8	4.94323	5.05357	4.94893	5.01621	5.12142	4.83752	5.07007	5.18543	5.00849	5.06837	4.76741	4.95431	5.10798	5.3502	5.06482	4.93703	5.13422	4.94175	5.20285	5.24696	5.31687	4.94583	5.28583	5.18342	5.01357	5.31958	5.19268	5.58098	4.98187	5.06052	5.35519	5.52001	5.00216	4.86914	5.11026	5.03449	5.08619	5.37425	5.01901	4.81502	5.01803	5.10427	5.26506	5.02698	5.17797	5.28283	5.34229	5.46889	5.20899
ABI1	10.195	10.4682	10.0264	9.53871	9.23953	9.9655	9.07477	9.52701	10.0775	10.2814	9.59437	9.70914	10.4032	10.6715	10.4815	9.61876	9.14463	8.97539	9.16086	9.39273	9.45783	10.0963	9.17034	9.11375	9.65761	8.66195	8.79662	9.21629	10.1299	9.99993	9.4191	9.65031	9.65743	9.5115	9.46259	9.61589	9.98186	9.52124	10.0133	9.76345	8.64372	9.16546	9.54935	8.97751	9.05168	9.51731	8.85502	9.43277	8.97081
ABI2	8.03999	7.32115	7.57514	7.61516	8.84598	7.88243	8.51125	7.76079	7.89106	7.93419	7.76561	7.90491	7.79337	7.79754	7.54643	8.42006	8.3947	8.0197	7.84088	8.05065	7.69708	7.59855	7.84002	8.19521	7.76675	8.38239	8.99783	8.04116	7.6432	8.01494	7.93031	8.39558	8.41882	8.01746	7.86276	7.58363	7.58535	7.74037	7.84866	7.54895	8.00413	8.08126	8.19675	8.07617	8.39945	7.98043	8.0245	8.02855	8.5324
ABI3BP	5.48164	4.03096	5.5711	7.1836	3.73442	4.05622	3.74611	4.47271	4.94385	3.93002	4.12361	3.99524	4.19428	3.92131	3.78554	3.81834	3.66955	3.74671	3.74813	3.9131	3.571	6.00858	3.64159	3.74904	4.06028	3.68748	3.8592	3.69515	4.04863	4.24587	3.92134	3.61653	3.77695	3.56793	4.5322	7.12877	4.53138	4.41283	4.00964	4.32839	3.80846	3.81211	3.68967	3.71344	4.41774	4.65251	3.83733	4.16859	3.92204
ABITRAM	8.10904	8.3574	8.07381	8.35477	8.53544	8.63471	9.01309	8.34567	8.4355	8.2553	8.38778	8.77806	8.31623	8.40165	8.32199	8.30254	8.74039	8.14449	8.79975	8.90206	9.39156	8.43056	8.95064	8.88137	8.70044	8.80455	8.50219	9.02291	8.48587	8.4174	8.45843	8.611	9.052	8.72917	8.53544	8.58505	8.2653	8.12814	8.74332	8.44235	9.05104	8.76581	8.84783	8.45922	8.83211	8.26161	8.68637	8.20219	8.65677
ABL1	9.52883	9.13918	9.74784	9.85021	9.39001	9.77481	9.45426	8.75486	8.94455	9.31297	9.22514	9.21375	8.9141	8.45449	9.22355	9.04414	9.69206	9.6126	9.57872	10.0374	9.95256	9.08806	9.79659	9.65566	9.54174	9.83886	9.82651	10.2408	9.2622	9.10781	9.13507	10.2032	9.11829	9.71217	9.93102	9.71106	10.0774	9.78109	9.544	9.095	9.84531	9.82909	8.78463	9.48718	9.3998	9.43044	9.81472	9.18819	9.36713
ABL2	7.33021	5.9805	5.74171	5.77281	6.06777	5.88524	5.77233	5.7483	6.76289	7.37737	5.5928	6.42707	7.01955	6.15197	7.99619	5.81521	5.95191	5.61768	5.56042	5.68752	5.43335	6.09717	5.50383	5.94134	5.73863	5.92226	5.73482	5.6212	5.6334	5.83445	5.50257	5.82145	6.07976	6.11549	5.77115	5.40365	5.6126	5.37565	5.58818	5.83616	6.03352	5.84818	5.93256	5.90452	6.35727	5.91815	5.85179	6.00326	6.10242
ABLIM1	8.98794	9.10174	10.4489	9.97515	11.227	9.52713	10.764	10.2752	9.2617	7.34049	9.31751	9.2607	8.10895	8.27329	8.83366	11.0646	11.7959	10.3696	11.3978	9.48606	10.4385	10.161	9.73473	10.6349	9.93329	10.2641	11.7403	9.68889	9.77601	9.25232	10.715	10.2078	10.3959	9.80135	10.8598	10.5869	11.1228	11.0031	10.7737	10.1959	10.3926	11.2527	9.83042	10.7679	10.9451	9.44084	9.8256	10.5543	10.2988
ABLIM3	7.26154	7.8937	6.36695	6.50258	5.85996	6.90627	5.82678	7.27768	7.7241	6.95206	7.23348	6.73053	7.30525	7.2221	7.06259	6.2944	5.51333	5.83057	6.87097	6.39819	5.84224	6.27195	6.03478	6.02919	6.48958	6.39735	6.26569	7.27991	6.57687	7.10929	8.1763	6.09974	6.00177	6.94971	7.01732	7.29826	5.89735	6.29316	6.82076	7.20685	6.17909	6.24057	5.97069	6.11505	6.20263	7.13927	6.41035	5.97197	6.22444
ABO	6.1449	6.10019	5.5932	5.84967	5.97361	5.80812	5.93937	5.94975	6.02815	6.2753	5.68087	5.80945	6.07976	5.87337	5.84038	5.86092	5.83743	5.7692	6.08015	5.78575	5.66083	5.67788	5.78849	5.84416	5.55164	5.8456	5.97016	5.79393	5.73725	5.81947	5.82732	5.716	5.87676	5.68142	5.5848	5.53837	5.86951	5.78618	5.50575	5.95117	5.98944	5.98393	6.15275	5.96036	5.949	5.95481	5.97771	6.39604	6.12939
ABR	9.04037	9.57812	8.93504	8.54119	8.70926	8.95192	8.59678	8.79195	9.32655	9.41007	9.07076	9.28428	9.68936	10.1206	9.41214	8.39662	8.91876	9.17595	8.77224	9.49405	8.54877	9.27645	9.40606	8.95621	9.45749	9.00474	9.04636	10.1457	9.38587	9.309	7.83537	8.5415	8.97441	9.45446	9.44846	8.57925	9.2806	8.86201	9.45205	9.19428	10.0032	9.03201	8.2094	8.28878	8.19746	8.83788	9.48717	8.37038	8.87586
ABRAXAS2	8.48902	8.28048	8.79541	8.6307	8.70172	8.87523	8.97826	8.2732	8.52945	8.11788	8.44241	8.58186	8.30471	8.35983	8.35386	8.63056	8.77926	8.69547	8.70678	9.0203	8.99201	8.63424	9.02863	8.88755	8.70985	8.89467	8.93047	9.01893	8.7303	8.45445	8.34813	9.15143	9.44205	8.68053	8.71308	8.54963	8.86068	8.84211	8.70808	8.16625	8.84818	8.63044	8.89773	9.00935	9.23496	8.71886	8.75952	8.2633	8.06317
ABT1	8.36586	8.33595	8.46619	8.73316	8.88288	8.46468	9.22364	8.29407	8.25528	8.20564	8.32967	8.42619	8.31777	8.40974	8.45075	8.69954	8.47661	8.73253	8.11745	8.58402	8.36594	8.13247	8.37926	9.23823	8.63317	8.79505	9.13404	8.62558	8.36777	8.27176	7.83946	8.74347	9.51681	8.31736	8.23735	7.98936	8.28653	8.47091	8.03116	8.10346	8.59455	8.50804	8.89517	8.77271	8.5258	8.46314	8.44112	8.11229	8.66405
ABTB2	7.56905	7.18874	7.99965	7.35538	8.56323	7.41616	8.51817	7.84023	7.26726	7.51024	7.42392	8.15525	7.06062	7.00498	7.25028	8.27294	7.86509	8.22414	7.8418	8.52152	7.51114	7.40007	8.33924	8.2591	7.18787	8.2619	8.73181	8.62244	7.32562	7.27962	8.97723	8.19178	7.4672	8.60581	7.15828	8.31167	7.01442	7.84755	7.51307	7.27891	7.81851	6.67314	7.05867	8.2918	7.42152	7.30812	8.7171	7.07159	7.3097
ACAA1	9.51323	9.93201	9.68222	10.0037	8.9225	9.77585	9.09841	12.3656	10.0719	10.08	9.53565	9.72995	9.99999	10.0978	9.98232	9.72227	9.68002	8.85804	11.0755	9.78625	9.7261	9.89806	9.60443	9.43116	9.48909	9.83941	9.12205	9.84466	10.0458	9.9851	11.7633	9.19907	9.48898	9.25802	9.36755	9.59333	9.5933	9.61627	9.95592	11.1499	9.4707	9.09724	9.5665	8.8609	8.62916	9.01464	9.20503	9.44787	9.33922
ACAA2	9.6316	9.97178	9.79425	11.4773	9.75798	10.2214	6.7036	12.1526	9.98794	10.0198	9.52214	9.53633	9.8597	10.016	9.8439	9.88719	10.6964	9.77716	11.0394	9.97994	11.0344	10.321	9.6741	10.0439	10.1617	10.5694	10.079	9.84671	9.91669	9.92817	11.9775	9.95603	10.6099	9.56456	9.8538	9.60003	8.3174	9.35241	10.1894	10.6688	10.2186	9.86524	10.4924	9.50253	9.8867	10.5503	9.73459	8.50443	9.51242
ACACA	7.65013	7.41652	7.77071	8.00614	8.26144	8.50106	8.91038	7.51024	7.52914	7.12819	7.83951	8.23967	7.39802	7.26134	7.38401	7.88934	8.61484	8.36901	7.86858	8.01508	8.66713	7.48391	8.29325	8.85754	7.83794	8.30235	7.8458	8.01919	7.56837	7.64939	7.86924	8.97333	9.27545	7.56929	8.20327	7.97435	7.59175	7.16933	8.04645	7.37684	8.92165	8.12735	7.44474	7.85589	8.31675	8.30138	8.23603	7.08842	7.55366
ACACB	7.23968	7.12292	7.84474	7.72217	7.23206	7.22577	7.56861	8.25025	8.2608	7.148	7.97462	7.62649	7.16435	7.3938	7.3183	7.74231	7.86252	7.81199	8.13255	8.203	7.76509	7.76509	8.15865	7.50542	8.41774	7.91406	7.75623	8.07392	7.76735	7.2442	8.37791	7.29105	7.30732	8.33037	8.22736	7.74205	7.86331	7.80967	7.80941	7.92338	7.91887	8.11278	7.26535	7.34131	6.89022	7.05591	7.90291	7.68589	7.58103
ACAD10	6.55467	6.68365	6.81895	6.87427	6.88165	6.76134	6.85779	7.51231	6.95194	7.09797	6.8583	6.93883	6.86254	6.8075	6.72265	7.06803	6.95159	7.34905	7.23555	7.28999	7.12949	6.56456	7.31676	7.3701	7.19129	7.28862	7.33077	7.07032	6.9904	6.82532	7.69894	7.01481	7.03232	7.19323	6.8897	6.94621	7.05551	6.78661	7.0465	7.20008	7.46901	6.78981	7.09614	6.59139	7.12122	6.7957	6.88349	7.19969	6.56925
ACAD8	6.58278	8.06604	8.54227	8.54046	8.08657	7.63196	8.37975	9.64288	8.12629	7.71383	8.2628	8.22109	7.69223	7.9588	8.04653	8.71741	8.26581	8.2626	8.46007	8.16071	7.22777	8.46755	8.33326	8.20192	8.21569	7.16859	7.94964	8.64988	8.38273	8.3304	9.16912	8.35516	8.52318	7.94233	8.06763	8.37782	8.55969	7.4571	8.09917	8.5695	8.13216	8.21369	8.24466	8.0377	7.81504	7.80399	7.7392	7.58351	7.44188
ACADL	4.16085	4.16593	4.14679	5.15153	4.05813	4.47139	3.93049	7.61985	4.37848	4.01806	3.86667	3.91539	4.16401	3.97369	4.05119	3.96952	3.7678	3.92353	6.35752	4.04537	4.01531	5.45456	3.95793	3.98683	3.79815	4.04471	3.92439	3.77129	5.14376	3.89857	7.6163	3.79858	4.13259	3.84348	3.88121	4.02184	3.83272	3.84894	4.21277	5.81626	4.22358	3.8214	4.01519	3.98333	4.62853	3.89537	4.01041	4.40811	3.96092
ACADM	9.86085	10.1367	10.48	10.293	10.426	10.2281	9.78421	12.4598	9.91501	9.93028	9.99062	10.1875	10.1074	10.2078	10.0836	11.2705	9.80638	10.1657	11.6935	10.4669	10.5503	10.1993	10.3212	10.7554	10.4092	10.2742	9.88225	10.1754	10.3592	9.79112	11.9972	9.23113	11.1569	10.2122	10.3295	10.1669	9.56404	10.0089	10.6648	11.5141	9.98624	10.2858	10.9211	10.681	10.4112	10.2303	10.1778	10.42	9.95966
ACADS	6.98957	7.10521	6.62763	6.80574	6.6893	6.94832	6.69647	7.58182	6.9847	7.01843	6.669	6.685	6.98771	7.14264	6.79644	6.65007	6.54916	6.61696	7.41086	6.81815	6.44853	6.67265	6.53457	6.9947	6.84342	6.71768	6.70241	6.67856	6.68211	6.84859	7.68112	6.59416	6.5792	6.64423	6.76504	6.5966	6.71083	6.72039	6.49489	7.1583	6.9417	6.73911	6.73193	6.67313	6.88546	6.69803	7.02727	7.06166	6.68394
ACADSB	5.96835	5.94252	6.53125	5.7277	5.15359	5.64488	5.44413	8.82399	5.83593	5.42975	5.095	5.49251	5.9135	5.70592	5.90951	5.32983	4.9472	4.74975	6.91107	5.49391	5.38897	6.14915	5.34363	5.15533	5.3103	4.61112	5.1491	5.66724	5.62096	5.57465	8.05824	5.36248	5.48527	5.05111	5.63149	6.30869	6.24212	5.6382	5.91066	7.59076	5.31963	6.15022	5.34916	4.79013	4.85476	5.95481	5.48817	5.20738	5.05206
ACADVL	9.45382	9.63075	9.28885	10.0341	8.88057	10.0492	8.40313	10.4337	10.0163	10.246	9.46428	9.44262	9.46677	9.22874	9.80961	9.41485	9.03542	8.76193	10.4787	9.58174	8.40717	9.81649	9.77675	9.2152	9.30654	9.40675	9.36647	9.78999	9.57431	10.1668	10.8601	8.63033	8.16141	9.27512	9.54337	9.95501	9.37377	8.74643	9.68144	9.85078	9.27824	9.5081	9.01679	9.03378	8.86986	9.80288	9.13668	8.86489	8.88634
ACAN	7.26229	8.09275	6.80289	6.62956	7.46811	6.9078	7.92293	6.79466	7.40034	7.47863	7.24814	6.81202	7.26676	7.33613	6.83081	6.98465	6.66742	7.23161	6.54344	6.42519	6.74366	6.77025	6.72292	6.7235	6.5373	7.79421	7.41789	6.56523	7.11702	7.48491	6.524	6.64603	6.48683	6.82784	6.50324	6.51211	6.82915	6.59471	6.59489	6.85292	7.08121	6.67871	7.04193	6.76623	6.62506	7.15023	6.73598	6.94526	6.9213
ACAP1	6.14094	7.04633	6.46263	5.77761	5.66464	5.87093	5.75789	6.23417	6.26346	6.28331	5.92676	6.01675	5.95346	6.66385	6.99251	5.96717	5.76703	5.62452	6.45354	5.79681	5.32448	6.43572	5.63271	6.01909	5.77869	5.91242	6.31771	5.89128	6.29481	6.77168	5.88452	5.61242	5.82176	5.94258	5.83711	6.10254	5.79379	5.91242	6.65056	7.02008	6.13105	6.02007	6.94002	5.50844	6.21057	6.01675	5.74571	5.88072	5.46646
ACAP2	9.72302	10.2587	10.3945	9.78333	9.47878	10.0054	9.51341	9.08179	9.98763	9.91922	9.71577	9.63561	10.0736	10.0748	10.0565	9.52498	9.43127	9.48517	9.31224	9.475	9.37529	9.91358	9.29035	9.64427	9.37034	9.32052	9.18143	9.66436	9.9296	9.75708	8.69954	9.40303	9.03522	9.64388	9.57396	9.69199	9.92155	9.60131	9.96293	9.83915	9.42874	9.6415	9.5675	9.76644	8.85424	10.3532	9.48921	8.97322	9.48236
ACAT1	9.65702	9.76049	9.84576	10.0976	9.05685	9.15444	9.25662	13.0009	10.074	9.55064	9.49207	9.03009	9.80009	9.93626	9.68355	10.2828	6.98425	8.97762	11.7531	9.12282	8.28994	10.1781	8.77955	8.92457	8.96546	8.99351	8.85936	9.0439	10.3537	9.79221	13.1484	9.56769	9.80436	9.02576	9.59645	9.90611	9.72242	9.40468	10.1147	11.5467	8.84765	8.50226	9.58604	8.32305	8.57045	9.60597	8.76004	9.32268	8.44247
ACAT2	7.96248	8.24852	8.25265	8.4712	10.0077	8.3997	9.42371	8.44255	8.03076	7.73204	8.35052	8.27072	7.98428	8.03986	8.03982	9.75435	9.11606	9.16887	8.09805	8.26354	9.52152	7.99763	8.3683	9.88897	8.5561	8.44235	9.39648	8.88457	8.15586	7.9946	8.01051	9.20629	9.75525	7.85402	8.18092	8.22761	8.22411	7.32118	8.22365	8.10047	9.85784	8.357	9.44054	9.14764	8.78768	8.31282	8.70233	7.86724	8.87622
ACBD3	10.7966	10.5036	10.5328	10.2378	9.93125	10.7303	9.99779	9.70942	10.5444	11.0617	10.2415	10.1398	10.5581	10.3303	10.7784	9.31021	9.9387	10.0534	9.57413	10.1229	9.94844	10.2555	9.61859	9.94148	9.85702	9.68963	9.63989	10.2587	10.2975	10.4395	9.9757	9.94277	9.29394	10.1215	10.0677	10.3929	9.7429	10.7644	10.0717	9.70164	8.94596	9.65353	9.00292	10.0327	9.06654	10.7484	9.57443	10.0147	9.42185
ACBD4	6.04334	6.56481	6.292	6.28471	6.0793	6.20175	6.02007	6.69221	6.42178	6.30093	6.29585	6.33493	6.12746	6.50363	6.04858	6.25429	6.1521	5.81352	6.54578	6.11958	5.87107	6.16615	6.36533	6.45115	5.95498	6.26436	6.06045	6.05421	6.13014	6.32329	6.85444	6.04941	6.01964	6.02555	6.14687	6.27766	6.65487	6.268	6.18797	6.86702	6.6538	6.49681	6.30541	6.30042	6.26373	6.58264	6.02153	6.7369	6.54642
ACD	7.00873	7.14456	7.78403	7.50416	6.84898	6.94687	8.0015	7.28684	7.21616	6.71648	7.34056	7.39355	6.68933	6.76704	7.19904	7.33116	7.69642	6.76325	7.51402	8.02477	7.68584	7.39957	7.58048	6.73791	7.34268	8.15954	7.04045	7.66343	7.35995	7.20291	7.06799	7.92786	7.53892	7.81614	7.54574	7.63585	7.17309	7.94566	7.35842	7.12323	8.70693	7.76066	7.22735	7.05737	7.31099	7.34166	7.71969	7.296	6.86848
ACE	4.32941	4.52404	4.02469	4.18332	3.8142	4.11716	4.28743	4.51515	4.29736	4.51699	4.28699	4.17902	4.39874	4.24244	4.29757	4.01643	3.98584	4.29828	4.17902	4.17902	3.94754	4.20384	4.25248	4.258	3.93369	4.12517	3.98331	3.96122	4.11179	4.27329	4.17902	3.94977	4.12847	3.95684	4.03189	4.11464	4.24552	4.08	3.87848	4.39244	3.90856	3.92694	3.75021	4.34972	4.52625	4.336	4.09355	4.51922	4.13095
ACE2	4.58504	4.33012	4.59072	6.03341	4.53844	4.49153	4.80498	9.96947	4.38582	4.31894	4.3805	4.3414	4.25747	4.38529	4.35524	4.81165	4.71555	4.51995	7.54871	4.62144	4.60687	4.58121	4.71676	4.54848	4.63943	4.87792	4.58967	4.57367	4.27886	4.62028	9.21247	4.62912	4.51698	4.70575	4.45849	4.55093	4.88775	4.49785	5.5067	7.97513	4.59882	4.6786	4.77031	4.33868	5.03371	4.68693	4.89789	5.06721	4.5328
ACHE	6.57134	6.44288	6.36473	6.17091	6.37713	6.28416	6.59223	6.83539	6.57674	6.78041	6.56475	6.43109	6.4748	6.35681	6.49125	6.32119	6.58441	6.45083	6.52572	6.41652	6.28811	6.16115	6.71836	6.65622	6.47737	6.55008	6.80292	6.35801	6.21811	6.42897	6.70709	6.31941	6.43109	6.56805	6.37735	6.14343	6.3276	6.46852	6.11929	6.0194	6.48963	6.18415	6.53956	6.31895	6.67125	6.0764	6.18562	6.46696	6.54543
ACIN1	7.50842	7.76404	7.80614	8.09868	8.39283	7.72095	8.13706	7.53333	7.75708	7.75933	7.90083	8.39023	7.5129	7.63898	7.84505	7.84469	8.18922	8.33059	8.36224	8.52098	8.27342	7.86325	8.90762	8.70213	8.15234	8.6806	8.50882	8.29082	7.91877	7.99608	7.86423	8.92772	8.58973	8.55625	8.07246	8.19756	8.07471	8.92345	8.19007	8.14021	8.53744	8.4687	7.81739	8.42982	8.14584	7.8088	8.31914	7.91067	8.06061
ACKR1	7.75944	8.2131	7.12026	6.31421	6.14452	6.55628	6.12196	7.44006	8.19214	5.95281	6.79869	6.83819	8.07738	7.08061	7.51305	6.11575	6.23701	6.18688	6.47629	5.8598	5.9398	7.19582	6.12767	6.17724	6.36051	6.67942	6.15815	6.31604	8.07336	7.47592	6.59259	6.07515	6.00484	6.7245	7.03367	7.46521	6.54136	6.04911	6.34301	7.09449	6.47037	6.01615	6.34638	6.10359	5.92322	6.46839	6.29195	7.32892	6.7654
ACKR2	6.04219	5.78394	5.92162	5.77514	5.86626	5.74478	5.66337	5.9401	6.10966	6.33905	5.8228	5.66657	6.04674	5.97987	6.01855	5.8278	5.7795	5.62873	5.85195	5.80155	5.44327	5.40559	5.68594	5.62583	5.79468	5.54505	5.65516	5.57068	5.83775	5.6995	5.68247	5.47696	5.59569	5.57793	5.52997	5.65845	5.68209	5.38376	5.64595	6.00745	5.72851	5.60564	5.77109	5.69886	5.81541	6.26178	6.12269	6.45157	6.00157
ACKR3	11.988	10.1038	8.45468	9.78115	7.41987	11.2304	8.58602	8.34721	11.0482	9.19162	8.97009	8.91115	11.0011	9.01685	10.3749	9.84126	7.77187	8.12516	7.99797	9.23597	9.28856	9.37926	7.6078	8.19444	7.30632	8.02897	5.94228	9.66736	9.44339	9.59157	9.0598	9.9876	8.88682	8.08188	8.31503	9.82697	7.54033	9.51606	9.49006	8.63094	4.78167	8.36732	7.32352	7.21604	9.26315	9.78057	11.8739	8.18834	8.59134
ACKR4	6.83324	5.16649	4.04511	4.5566	4.74779	4.71765	3.93986	4.46498	6.13837	4.39406	4.11419	4.70294	5.07876	3.93528	3.98349	3.79971	4.07723	4.27124	3.96162	4.57992	3.91368	4.911	3.79975	3.94952	4.14914	3.99195	3.69446	3.85976	4.16415	4.01175	4.29618	3.85342	3.56746	3.86813	3.94053	3.79541	3.91867	3.7926	3.88624	4.49418	4.01773	3.77015	3.87522	4.11629	4.55588	4.03153	4.04828	4.33961	4.5365
ACLY	11.3025	10.1063	9.98214	10.2168	10.9566	11.0008	10.4427	10.6055	10.1811	9.98106	9.9793	10.0466	10.4533	9.65516	10.2843	9.88041	10.2408	10.3077	10.4065	10.3177	10.6127	10.3162	10.1975	10.2381	9.91174	10.0512	10.3842	10.6751	10.175	10.5618	10.9878	10.6914	10.5301	10.2277	10.3248	10.1711	10.2408	9.8659	10.1845	10.1747	10.6798	9.96481	9.91188	10.4089	10.3268	10.4794	10.5969	9.41781	9.94786
ACO1	8.46103	8.4883	8.48361	8.74524	8.24626	9.4919	7.42043	11.0838	8.76413	8.37454	8.27246	8.16308	9.09554	8.44611	8.63922	8.33017	8.50597	7.71943	9.35677	8.10895	8.64537	8.65347	8.20196	8.16648	7.94682	8.26708	8.3593	8.5942	8.5304	9.34283	10.4764	8.51911	8.53022	7.87414	8.48361	8.84875	9.71534	8.47317	8.79413	9.49586	7.63035	8.43123	8.85018	7.67859	7.93025	9.11093	8.64184	7.74995	8.12253
ACO2	8.06109	8.22817	7.7527	8.17327	8.50106	8.03644	8.19759	10.2476	8.06798	8.24152	7.75347	7.97326	8.32525	8.17709	8.15989	8.23987	8.12356	8.68803	8.9978	8.20593	8.22103	7.92173	8.0598	8.0499	7.98738	7.92215	8.32466	7.65314	7.92293	7.57859	10.1958	7.5528	7.78905	8.08527	8.09138	8.48946	7.90385	7.81102	8.51229	8.80862	8.1938	7.79052	7.94134	7.68936	7.59872	8.1963	7.85987	8.08876	7.35779
ACOT11	6.88016	6.94473	6.74305	6.91765	6.77691	6.37667	7.24222	7.75718	7.00515	7.29062	6.63806	6.65704	6.99311	6.96022	6.83061	7.26499	7.11795	6.63833	7.59778	6.89161	6.54314	6.66558	6.7306	7.27133	6.53085	6.98178	7.38819	6.80883	6.80206	6.91248	7.77295	6.63088	6.81664	6.764	6.67202	7.54663	6.70761	6.54213	6.73672	7.09449	6.88533	6.77357	7.50439	6.89494	7.30127	7.07213	6.73568	6.91026	7.06483
ACOT13	9.38158	9.90799	8.02364	8.6905	8.46107	8.93301	10.0266	10.4538	9.72697	10.3217	8.65587	8.72278	9.84546	9.87445	9.57953	10.5971	8.7572	8.83217	9.25824	8.95333	8.75314	8.44705	8.81653	8.99963	9.28585	8.86334	8.66267	8.35976	8.37858	8.77175	9.82686	8.94117	9.41139	8.40083	8.11573	8.19098	7.79699	8.36644	8.79557	9.53791	9.24882	8.4336	9.46323	8.95854	9.48156	8.95579	8.87204	7.306	8.78416
ACOT7	8.44882	7.92891	7.64314	8.19269	9.48398	8.38138	10.0097	10.9147	7.68384	7.83139	8.15528	8.18047	8.30208	7.5599	7.59339	8.63944	8.78351	8.08608	9.19868	8.33965	9.27792	7.48562	8.51616	8.15699	6.45405	9.87696	10.1295	8.65823	7.8365	8.44426	10.098	8.56425	9.79776	8.91843	8.18747	7.33855	7.40415	8.54277	8.04068	9.20647	9.59726	8.50682	8.24604	8.34961	7.9643	9.05911	8.93902	7.22292	7.70671
ACOT8	7.37622	7.44991	7.5875	7.49675	7.75307	7.742	7.64991	7.75569	7.41432	7.48786	7.33701	7.29826	7.47239	7.64011	7.39276	8.38833	8.09592	7.87497	7.84057	7.65514	7.85237	7.27886	7.59806	7.83005	7.53758	8.01981	8.21968	7.86649	7.35539	7.46365	7.79056	7.63981	8.2046	7.46612	7.33863	7.50638	7.40526	7.99132	7.47499	7.2908	7.46864	7.42622	8.4032	7.29444	7.52501	7.6166	7.36109	7.0436	7.00504
ACOT9	9.80007	9.45373	9.0079	9.06843	8.69597	9.04661	9.56472	8.61019	9.6231	9.60162	8.98374	9.07217	9.5925	9.61401	9.76219	9.82451	8.65614	8.54456	8.64096	8.41869	8.29447	9.17988	8.3445	8.44514	8.42919	8.92003	8.7396	8.61207	8.97849	9.22185	7.85383	8.69232	8.7853	8.72608	8.7401	9.04195	8.27819	8.00095	8.80389	8.7978	7.59615	8.53521	9.0573	8.36573	8.21625	8.88867	8.34029	8.43033	8.54934
ACOX1	8.82889	8.62783	8.00022	8.43781	7.86922	8.98258	8.32013	9.81905	8.63695	8.7451	8.21461	8.34606	8.92803	9.15227	8.871	8.41811	8.63547	7.72405	8.76195	8.66236	8.34678	8.68242	8.25145	7.36273	8.37276	8.12242	8.37276	8.88605	8.45323	8.81533	9.68859	8.40379	8.0727	8.50683	8.51594	8.77247	8.70921	8.02741	8.6605	8.37676	7.3107	7.98394	8.31555	7.27966	7.48186	8.34485	7.99202	7.44927	7.33365
ACOX2	7.04384	6.97411	8.23472	8.21731	6.45146	7.50911	6.36807	10.1401	7.65697	7.27962	7.49162	6.70209	6.90937	6.23383	6.76171	6.98504	6.05863	6.74766	8.74966	7.42104	6.25527	7.64184	7.5343	5.5743	6.41425	5.40998	6.11111	7.02369	7.42962	6.86608	9.28444	7.53307	5.60302	6.391	7.17182	8.41638	8.96108	7.33472	7.71182	9.10365	6.89513	8.08678	7.38256	6.41692	5.73525	6.95334	6.89775	7.92829	6.03032
ACOX3	6.88832	6.78119	6.33187	6.06829	6.4223	6.95538	6.5338	6.81266	6.78035	6.87146	6.13124	6.47154	6.65208	6.78897	6.81953	6.38473	6.23826	6.37666	6.67691	6.49841	6.36912	6.40114	6.45343	6.25778	6.33192	6.60317	6.15441	6.82061	6.4644	6.8427	6.77043	6.38475	7.10777	6.42951	6.4489	6.27758	6.37303	6.39992	6.59091	6.60752	6.85963	6.39785	6.54961	6.61589	6.67325	6.81153	6.41845	6.2732	6.41887
ACOXL	3.46512	3.44549	3.3116	3.28283	3.4564	3.46578	3.37735	3.44852	3.37185	3.44549	3.36572	3.4137	3.47987	3.34616	3.5187	3.44759	3.46704	3.44549	3.4747	3.38278	3.42491	3.28539	3.59171	3.6053	3.44549	3.33081	3.76752	3.36501	3.36674	3.34151	3.47534	3.47928	3.47258	3.48229	3.41017	3.43703	3.43494	3.45123	3.48052	3.38513	3.45248	3.42491	3.43849	3.50415	3.5047	3.40991	3.39426	3.7867	3.32231
ACP1	9.30614	9.92297	10.2868	10.1908	11.3652	10.4884	11.3659	10.2228	9.80335	9.54746	10.3565	10.7139	9.6477	9.85131	9.74931	11.1168	10.5504	10.8789	9.9687	10.7815	11.1182	9.8957	10.9345	11.1561	10.6631	10.8355	11.2481	10.8044	10.1225	9.9995	9.82353	10.8947	11.1501	10.5507	10.3779	9.87561	10.136	10.4063	10.0634	10.0442	11.2412	10.3701	10.8368	11.0781	11.1776	10.4095	10.8335	9.98008	10.4615
ACP2	9.18367	9.63369	8.61177	8.45931	8.40639	8.68526	7.73614	8.76702	9.48854	10.0494	8.37455	8.70378	9.9587	10.3011	9.69536	7.96728	8.2162	8.39278	8.48673	8.81121	8.35372	8.7746	8.54357	8.48437	8.89639	8.41996	8.47838	8.8856	8.84613	9.1932	8.73431	8.23803	8.21818	8.48448	8.39804	8.34146	7.97035	8.05925	9.31791	9.20672	8.59829	8.98883	8.29106	8.15283	8.3704	8.91888	8.32469	7.80682	8.57016
ACP5	10.6266	12.4303	9.60129	8.25499	7.30374	8.65389	5.79553	10.2347	11.2722	12.3061	10.9394	11.2164	12.35	13.0398	12.0564	6.23764	7.4312	6.62255	7.94812	9.66035	7.01803	11.3275	8.29648	7.30008	11.0012	8.39216	7.51958	7.61727	10.5858	10.5023	10.0658	6.6273	6.6824	11.0864	9.51012	7.62471	8.22481	8.4884	11.6882	10.5005	6.4857	7.44151	6.71778	7.42501	6.75926	9.20013	7.07802	7.17259	9.84248
ACP6	7.16891	7.10815	8.21362	7.76709	8.45861	7.03043	8.72455	8.76293	7.33394	7.57342	7.30196	7.7332	7.51085	7.59011	7.40012	8.60537	8.28463	8.88063	7.89197	8.10591	9.20873	7.84179	7.37803	8.17203	7.77023	8.01546	8.02116	8.21209	7.97492	7.3702	8.44978	8.19175	8.21818	7.55256	8.49234	8.55801	10.266	9.14722	8.09824	8.33251	8.62333	8.58335	8.02887	8.0228	7.84316	8.073	7.69492	9.11252	7.92195
ACPP	5.03592	5.33676	4.59451	4.96036	5.04037	5.00092	5.76208	7.40639	5.07525	5.07462	4.68059	4.76273	5.40621	5.53576	4.81123	5.61382	4.7919	4.45244	7.38459	4.42326	4.578	6.08805	4.65336	5.23088	4.65451	4.64076	4.90919	4.55097	5.29971	4.95768	8.49264	4.88132	4.55535	4.6534	4.75902	4.29806	5.2127	4.60874	5.04299	5.49438	4.82938	5.38698	5.21171	4.93765	5.26334	5.43725	4.67692	6.07976	4.58315
ACR	5.45984	5.56769	5.30796	5.49673	5.37611	5.28843	5.60604	5.6275	5.53209	5.70012	5.33075	5.40409	5.55071	5.53964	5.26894	5.74088	5.26276	5.22106	5.44634	5.34966	5.29544	5.20966	5.35485	5.29437	5.42554	5.47377	5.56908	5.29547	5.27773	5.44981	5.51316	5.4428	5.29548	5.40581	5.31505	5.14461	5.43015	5.43244	5.27448	5.38913	5.73489	5.62248	5.59427	5.35971	5.53601	5.4428	5.28687	5.93168	5.35712
ACRV1	5.67469	5.63319	5.73767	5.58381	5.43217	5.59704	6.34665	5.49752	5.37067	5.6946	5.44929	6.36311	5.52437	5.66721	5.5282	5.66856	5.65175	5.62751	5.49961	5.91885	5.15501	5.30332	5.51718	5.32957	5.62994	6.20121	5.4072	6.25435	5.38662	5.70732	5.49661	6.41354	5.93646	5.71784	5.54355	5.1834	5.21238	5.25179	5.34764	5.79189	5.79057	5.84766	5.50656	6.84962	5.94509	5.60245	5.66388	5.7384	5.83875
ACSBG1	4.27055	4.19964	4.60434	4.31299	4.18399	4.09715	4.93409	4.2048	3.99824	4.26781	4.03171	4.29569	4.24286	4.1458	3.9635	3.96046	4.4806	4.13927	4.05495	4.06893	4.4223	3.76003	4.10981	4.72492	4.69502	4.04412	5.50463	4.16289	3.89097	3.87932	4.05228	4.29289	4.27657	3.98724	4.73052	3.87677	4.004	4.24286	3.87217	4.19963	5.04728	4.42748	5.16036	4.62962	4.84537	4.60393	4.38635	4.37622	4.81599
ACSBG2	4.8655	5.13983	4.99501	4.81676	4.97341	4.90509	4.92961	5.21911	4.95049	4.9616	4.91128	4.81251	5.0521	4.88317	5.00136	5.06944	4.98682	4.98502	5.27938	4.71251	4.98711	4.63877	4.77123	5.16311	4.95537	5.01104	4.97373	4.72117	4.84294	5.04156	5.2367	4.86838	5.25227	5.02312	4.89064	4.96958	4.622	4.82583	4.69805	5.19971	5.34348	5.46914	5.08022	5.14482	5.03163	4.89273	4.83411	4.99514	4.99493
ACSF2	7.35435	7.56171	8.16865	7.46682	7.68126	7.57589	8.12891	10.895	7.5603	7.42292	7.443	7.81369	7.59248	7.4707	6.98959	7.85463	8.05323	7.25955	9.23979	8.16982	7.63976	7.32379	8.03105	8.29478	7.58392	7.55244	8.33303	7.26053	7.29346	6.85098	10.2642	7.95442	6.95825	7.03388	8.02684	8.48161	7.22884	7.29111	8.19947	9.57735	8.5454	8.3735	8.80558	7.36064	8.09048	8.44223	8.23184	7.4561	7.49758
ACSL1	11.4187	10.9493	9.29389	8.83999	7.54668	9.44552	6.19129	11.9023	10.9209	10.9096	9.62424	9.43721	11.126	11.1877	11.8695	6.81314	8.22436	7.33028	10.8905	8.58589	8.11263	10.0911	7.59034	7.02915	9.51807	7.99518	7.00418	9.26253	9.77752	10.6086	11.818	7.59889	8.6237	8.88974	9.42844	9.02395	9.39072	8.56503	10.2248	10.6407	6.79694	8.49353	7.8579	7.33101	6.8127	9.86181	8.02443	8.38707	9.42288
ACSL3	10.0304	10.1729	10.4182	9.99151	10.2313	10.5906	10.7493	10.0785	9.81685	10.0088	11.5986	11.7477	9.89967	10.5839	10.1589	10.479	11.0507	11.1597	10.0843	12.3163	11.0051	10.2513	12.3603	10.2459	11.8137	9.83589	9.84261	12.0686	10.2107	9.83379	10.6181	11.1093	9.80651	12.3535	11.3253	10.4599	10.4225	11.4999	10.4181	9.87846	10.5291	11.7318	9.72697	10.1402	9.14465	10.6779	11.043	9.6154	9.37267
ACSL4	9.68487	8.62983	9.05616	7.68228	7.15142	8.27754	7.0324	8.20126	8.33085	9.23043	7.1284	7.69152	9.24139	8.70175	8.8937	7.64037	6.84035	6.56479	8.36236	7.56196	7.85048	9.18234	6.99879	5.81566	7.83986	7.53208	6.62341	8.68265	9.01155	9.28082	9.12232	7.38539	6.54106	7.80207	8.68824	11.4562	9.33447	7.97166	8.95821	8.84113	7.0273	8.43141	8.47895	7.3486	6.62234	9.10338	7.54474	8.60902	7.37713
ACSL5	7.74554	8.4843	8.08443	6.9165	5.94032	7.7513	5.04508	7.12159	8.38144	7.8202	6.79196	7.02093	8.10857	7.94809	8.58367	5.23042	5.65552	5.77737	7.0843	6.33211	6.1062	8.97259	5.42001	5.75793	6.5742	6.27752	6.35462	6.42682	8.81207	7.73996	7.34823	5.76531	5.42546	7.07162	7.51781	9.1683	8.25235	6.13497	7.85731	8.19759	5.65617	6.08197	6.2471	5.40081	5.19221	6.4669	6.25808	7.07424	5.67796
ACSL6	5.71677	5.94947	5.37592	5.65163	5.51811	5.51126	5.71204	5.68623	5.73005	5.8838	5.50293	5.51778	5.69437	5.82685	5.57911	5.77469	5.49468	5.76755	5.51397	5.3869	5.18387	5.257	5.46741	5.48267	5.46246	5.42957	5.37329	5.35659	5.50713	5.71186	6.02187	5.29217	5.35226	5.45561	5.36139	5.26598	5.27251	5.27657	5.29706	6.34534	5.73674	5.56351	5.40152	5.70418	6.15278	5.61095	5.83775	6.11076	5.99689
ACSM1	5.18153	5.10937	5.17345	4.91779	5.08893	5.04086	5.10892	5.53477	4.93466	5.14473	5.15587	5.07908	5.18365	5.13837	5.06202	5.10764	4.99557	4.93383	5.28596	5.05707	5.00181	5.09564	5.21984	5.51156	5.19165	5.33342	5.25775	5.1783	5.02346	5.06001	5.39162	5.1231	5.13274	5.04601	4.84385	5.01802	5.42994	5.13942	4.97557	5.19508	5.2338	4.99752	5.25855	5.02866	5.51594	5.0744	5.11259	5.49447	5.12481
ACSM3	5.17815	5.00969	6.96707	7.93404	6.8016	5.79222	8.1432	10.3225	5.08695	5.03289	5.13466	4.92279	5.16243	5.43797	5.33847	7.07092	7.30433	5.74752	8.23095	4.91706	7.86549	7.21696	4.6199	9.97357	7.54807	5.46764	7.27007	5.01242	7.36081	6.74334	9.65451	5.31051	6.6795	5.44667	6.87218	5.3923	4.82215	5.80823	7.30877	8.12549	6.06157	6.79072	6.64956	5.31076	5.79887	6.53043	6.04669	5.62922	5.32716
ACSM5	6.28407	7.07262	6.17605	6.4788	5.99199	6.318	5.59781	9.59369	7.26611	6.90376	7.14472	7.13039	7.6504	8.1902	7.97851	6.22993	5.89905	6.48197	7.47638	6.83321	6.3866	7.40059	5.7935	6.07789	6.84559	6.34326	6.29858	6.16232	7.25987	6.53118	7.94109	6.08896	5.96849	6.97843	6.25775	6.15447	6.79657	6.60625	7.54448	8.12762	6.16261	5.66735	5.68742	6.062	6.1197	6.10274	5.88338	6.74637	6.18166
ACSS3	6.16698	6.50074	5.25824	5.25197	4.89767	5.83959	6.35177	7.70815	7.13154	6.62289	6.19059	5.95592	5.92123	5.72347	4.79766	5.8954	7.02826	6.52012	6.58033	5.87554	5.95007	7.09587	5.48207	5.11111	6.26811	5.86285	4.96837	5.80302	6.80206	7.51026	7.54023	6.3456	4.98144	5.82086	6.56058	7.42931	6.63002	6.26527	6.47251	7.22815	5.05129	7.65152	5.19437	5.66664	5.9046	5.43578	5.42563	7.1381	5.82172
ACTA1	4.49392	6.65968	4.67761	7.27146	4.71344	8.31848	4.51417	4.31861	4.49181	6.84222	4.69552	4.91662	4.61872	4.2726	4.64574	4.13019	4.26324	4.43537	4.6756	5.55979	4.63527	4.46412	4.78769	4.54984	5.23976	4.13415	4.55132	4.32406	4.5305	4.92754	4.84336	4.77557	4.7725	6.80761	4.78925	4.6268	4.12752	5.13427	4.26157	4.49698	5.61258	4.45285	4.11288	4.25641	4.44178	7.69887	4.24262	4.22662	4.40292
ACTA2	13.5397	12.5355	11.1177	13.8135	11.2616	13.2365	9.64534	12.3992	13.5976	13.7716	13.4146	12.5013	13.3733	12.7418	13.0335	9.97808	9.35266	10.8343	10.9472	11.0204	11.5057	13.3672	10.0973	8.97096	10.2822	11.1099	11.1907	10.9044	13.0236	13.7664	11.4103	11.047	10.2869	11.4581	12.5562	12.6507	10.618	12.0439	12.0207	12.3404	7.74091	8.22108	9.39256	10.4049	9.54033	12.8975	10.5883	11.4622	10.7909
ACTB	13.5629	13.3348	12.7789	13.4236	13.2623	13.2632	12.8061	12.8388	13.4043	13.5904	13.3302	13.1875	13.684	13.5342	13.5193	12.3972	12.3187	13.0764	13.1882	13.2524	13.1711	13.3514	13.0381	12.8285	13.0617	13.1538	12.6914	13.0566	13.2288	13.5684	13.4892	13.3785	12.9729	12.8614	13.3154	13.5475	13.4313	13.2326	13.2203	13.6603	13.134	13.1226	12.5668	13.3241	13.4104	13.1674	13.3307	13.8993	12.9424
ACTC1	6.67782	9.99968	7.26463	10.1211	7.14372	12.1635	6.62616	7.21916	7.19238	10.6637	7.28527	7.842	6.63014	6.96627	7.01786	6.17044	6.12917	6.54761	7.07639	6.84266	7.30381	7.12869	6.07297	5.78563	7.70612	7.15979	6.56776	6.82325	6.67198	6.61223	6.7657	6.66752	7.52557	7.2619	6.91244	8.03517	6.46444	6.90674	6.83954	6.59723	8.11444	6.4097	6.4966	6.4818	6.67648	9.91182	6.44831	7.39393	6.68439
ACTG2	9.50178	9.1306	6.47928	11.1595	6.61039	9.34248	5.99562	8.3833	9.04343	9.84104	8.39265	8.33118	9.81792	7.78558	10.1052	6.06976	5.34967	6.14277	5.76322	6.24732	7.17355	8.31552	5.80134	6.54858	5.79496	5.80646	6.75551	7.13325	8.2616	9.56775	7.82094	6.52993	6.65704	7.11178	7.25997	9.88967	6.28706	7.06653	5.70138	6.33718	6.41659	5.65677	6.33795	6.36559	6.10381	9.19516	6.91021	6.77386	7.58966
ACTL6A	9.0088	8.95619	9.53865	9.58765	10.9728	9.66392	10.5853	8.64916	8.97985	9.06401	9.67658	9.88552	9.02008	9.0364	8.99158	10.7164	10.8638	10.5463	10.184	10.2438	10.8691	9.51865	10.4181	11.418	10.2939	11.1783	11.0575	10.4154	9.9203	9.28287	9.16015	10.5949	11.0062	10.4659	10.0079	9.62495	10.1329	10.3662	10.0757	9.0946	10.7893	10.6485	10.9043	10.9161	10.8089	10.721	10.7885	9.42397	10.5675
ACTL6B	6.56899	6.50479	6.40797	6.42658	6.43925	6.32259	6.31022	6.48551	6.23889	6.47724	6.11065	6.1035	6.47278	6.28518	6.31008	6.45579	6.31426	6.09443	6.4194	6.30874	6.14055	6.38539	6.24319	6.32812	6.16192	6.42	6.67187	6.1087	6.30394	6.31757	6.35139	6.53405	6.43724	7.30092	6.18635	6.33088	5.89948	6.53127	6.00116	6.40907	7.64336	6.25754	6.56666	6.56463	6.84973	6.46237	6.2082	6.7905	6.61961
ACTL7A	6.09762	5.85529	5.91071	5.71171	5.95847	5.89174	5.88551	5.93415	5.92467	5.93092	5.51334	5.70893	6.16293	6.00582	5.85718	5.79525	5.80646	5.93519	5.78459	5.97981	5.47944	5.77792	5.82337	5.94081	5.66281	5.92554	6.05398	5.79741	5.83337	5.9528	6.06538	5.69712	5.64922	5.56491	5.64158	5.72356	5.52039	5.84151	5.5152	5.57002	6.01355	5.99362	6.05616	6.02382	6.28777	6.16504	6.14641	5.83309	6.01089
ACTL7B	5.69165	5.56304	5.43207	5.23155	5.28464	5.54349	5.67735	5.51043	5.45228	5.47713	5.35382	5.54456	5.43207	5.47713	5.34155	5.51362	5.4096	5.42559	5.50482	5.35033	5.39384	5.35872	5.5628	5.58982	5.55973	5.63643	5.9398	5.50455	5.37058	5.6105	5.61923	5.64599	5.63594	5.40048	5.32948	5.41705	5.44175	5.4158	5.40059	5.6508	5.74981	5.61914	5.75864	5.55702	5.76429	5.51043	5.54129	5.79294	5.85257
ACTL8	6.48717	6.45927	6.2651	6.38862	6.38078	5.90537	9.06417	6.60678	6.4959	6.83586	6.76413	6.48981	6.4104	6.71471	6.47048	6.64096	6.38862	6.44195	6.31279	6.38862	6.60076	5.95896	6.22908	6.75619	6.38862	6.24826	6.63089	6.30163	6.1691	6.26017	6.87581	6.47733	6.52909	6.25916	6.08359	6.02248	6.36861	6.36856	6.06304	6.27092	6.32864	5.86033	6.03845	6.27142	6.29567	5.99439	6.13265	6.33554	6.36562
ACTN1	12.107	11.3794	10.8366	11.3087	9.99098	11.2798	9.32585	10.1116	11.5291	11.8905	11.2916	10.9885	11.9802	11.3672	11.6578	9.30157	9.61605	10.0526	9.82152	10.2915	10.0584	11.551	10.0286	8.54007	10.321	10.4928	9.85876	10.409	11.4541	11.9855	9.69061	9.92406	9.14229	10.8817	11.0987	10.8037	9.74744	9.79104	10.921	11.0063	9.40034	9.77032	8.78104	8.87291	9.69548	11.2739	10.529	9.50425	9.47523
ACTN2	6.57697	7.41635	5.77396	6.96167	6.06654	8.15163	5.62044	6.05837	6.0234	7.47414	5.97668	5.48834	6.25074	5.81982	5.86931	5.64867	5.35954	5.69344	5.7516	5.64063	5.39211	5.81194	5.54119	5.78938	5.82732	5.67522	5.97668	5.75836	5.93924	5.83806	6.4114	7.46048	6.47439	5.78195	6.08439	6.03032	5.81039	6.62356	5.58704	6.11205	6.40061	5.97668	5.90431	5.84493	5.99499	7.32081	5.78086	6.65168	5.71354
ACTN3	5.63744	5.84624	5.71671	5.72033	5.63078	5.7059	5.88381	5.77662	5.79674	5.94451	5.64526	5.98299	5.56156	5.5706	5.79695	5.53705	5.60736	5.76031	5.74445	6.25622	5.73298	5.51436	5.931	6.00931	5.98467	5.52071	5.88622	5.57692	5.54108	5.75442	5.42888	5.63094	5.53409	5.86948	5.59655	5.31654	5.52178	5.58718	5.53652	5.59372	6.90344	5.50206	5.71671	5.6491	5.9047	5.763	5.55433	5.77052	5.6094
ACTN4	8.32191	7.89366	7.93695	8.11565	7.84553	7.80336	9.67164	8.32195	8.03384	8.04788	8.28888	7.89817	8.33426	8.00851	8.06824	7.84257	7.93154	7.91016	8.38641	8.01851	7.84611	8.04823	7.98603	7.54272	7.72843	9.38627	8.00023	8.1738	7.97558	8.17465	8.46908	8.24914	7.53389	7.73661	8.22063	8.60804	8.68744	8.34688	7.96461	8.1865	7.5842	7.90906	7.40914	7.91934	7.83954	8.28999	8.11186	8.75392	7.9086
ACTR10	10.9073	10.7733	11.2915	11.0805	11.0311	10.802	10.5389	10.8989	10.8287	10.5978	11.1215	11.049	10.7021	10.8699	10.7991	11.7569	11.4857	10.9268	11.4016	11.3072	11.3064	11.1806	11.4201	11.1382	11.201	10.8834	11.5976	11.5658	11.1998	11.0729	10.9287	10.9097	10.9212	11.0717	11.2547	11.267	11.3574	10.9635	11.2375	10.9898	10.9424	11.1702	11.7756	11.3078	11.019	11.4822	11.0962	11.1644	10.9124
ACTR1A	8.95271	8.67965	8.05057	7.81747	8.97699	8.73396	8.7761	7.80288	8.57591	8.78242	7.99222	8.0677	8.83693	8.62756	8.73542	8.29855	8.18457	8.54827	7.94173	8.13966	7.99402	8.0173	7.98565	8.29625	7.99053	8.88459	8.87016	8.93102	8.2381	8.53142	7.70316	8.75416	9.72842	8.2431	8.14766	7.89904	7.28825	7.8662	8.0509	7.87696	8.81874	8.09559	8.3654	8.58329	8.75112	8.51287	8.18593	7.46388	7.97358
ACTR1B	8.05924	8.35414	8.40058	8.42331	9.09719	8.43407	8.77713	8.62406	8.37036	8.31782	8.50446	8.65858	8.28479	8.5154	8.19141	8.57033	8.60779	9.11921	8.8566	8.81529	8.88676	8.16064	8.71147	9.15455	8.66981	8.9505	8.67719	8.81574	8.37346	8.36529	8.8152	8.73526	8.39773	8.66876	8.75946	8.37058	8.42829	8.63395	8.61668	8.50774	8.61856	8.93996	8.62316	9.55656	8.53886	8.55814	8.88676	8.76145	9.07786
ACTR2	12.1918	12.6012	12.1331	11.9308	11.9411	12.7094	12.2324	11.7548	12.342	12.5913	11.9846	12.0636	12.4078	12.6068	12.5009	11.1693	11.7602	11.8079	10.5869	11.531	11.7346	11.9826	11.3648	11.4034	11.7322	10.7799	11.222	11.5747	11.8797	12.2572	11.0659	11.7297	11.4926	11.4922	11.7625	11.7704	11.8196	11.6307	11.9404	11.2266	11.1105	11.6489	10.5379	11.3826	10.875	11.9622	11.5387	11.2718	11.4601
ACTR3	12.6432	12.6321	11.7148	11.7959	12.1905	12.6192	12.0412	11.7726	12.4711	12.7201	11.9636	12.1355	12.6911	12.6688	12.7321	11.6946	11.4881	11.6091	11.4128	11.5195	11.7655	12.4388	11.4248	11.2136	11.6579	11.889	11.4851	11.5343	12.3064	12.6	11.7766	11.8219	11.8449	12.3184	11.9719	12.32	12.162	11.9451	12.153	12.0209	10.886	11.0403	11.3999	11.8799	11.4383	12.0823	11.4929	12.2522	11.8798
ACTR3B	6.24547	5.86796	7.62457	7.17986	7.57043	7.29493	8.18686	6.62669	5.89851	6.02491	7.35958	7.52087	5.69288	5.70416	6.35028	7.93563	7.8354	7.75759	7.67285	8.20784	8.48035	6.76203	8.05538	7.97091	7.99208	7.34538	6.96021	7.87997	7.00978	6.61693	7.15118	8.19709	10.0098	8.00501	8.06013	6.93615	7.48868	7.18649	7.49051	6.72281	8.79694	7.64522	8.47941	7.76645	7.8621	6.89989	8.47151	7.09441	8.10835
ACTR5	7.07992	7.40018	8.06705	7.56037	7.68692	7.55766	7.94056	7.32463	7.58071	7.13241	7.61742	7.7899	7.33059	7.41814	7.51877	7.37938	7.94497	7.7697	7.45348	7.69007	7.58101	7.4083	7.91615	7.99815	7.45692	8.34969	7.89721	7.84606	7.72263	7.55267	7.36334	7.57361	8.64775	7.67739	7.48694	7.50876	7.65054	7.98816	7.53516	7.43665	7.87925	7.67177	7.65449	7.75146	7.24976	7.51608	7.42301	6.9349	7.63583
ACTR6	8.37035	8.66313	9.27355	8.80105	9.25972	9.01573	8.82301	8.79052	8.67624	8.53671	8.76148	8.68022	8.6631	8.8268	8.69364	10.1242	9.17332	9.42818	9.42522	8.86955	9.47178	8.99853	8.91178	9.72963	9.14101	8.65045	9.11349	8.94077	8.95165	8.51093	8.59671	8.93606	9.6688	9.60668	8.72725	9.17675	9.21986	8.91316	8.94104	8.73098	8.6842	8.93936	9.66814	8.94609	8.86933	8.69625	8.84666	8.13582	8.7723
ACTR8	6.47262	6.71322	7.7887	8.04378	7.47325	7.43968	7.62381	7.30163	6.85907	6.99687	7.69588	7.75769	6.66729	6.596	7.18692	7.83216	8.11481	7.95491	7.43274	7.98609	8.02405	6.89712	7.61113	8.35811	7.69029	7.03272	7.25795	8.1278	7.09034	7.16766	6.87514	7.75353	8.16141	7.1944	7.46088	7.565	8.28825	7.61863	7.68785	6.84044	7.92537	8.10738	7.71595	7.33309	6.99887	7.0011	7.55951	7.15744	6.87963
ACVR1	10.0465	9.86812	10.5976	9.60907	10.2239	10.4258	9.38075	9.63657	9.78886	9.99453	9.86117	9.70181	10.0621	9.60901	9.80532	9.45242	10.1767	10.1006	10.2305	9.8022	9.37212	10.1016	9.74085	9.36018	9.94792	9.11702	9.81548	10.8055	10.0604	10.1894	9.5741	11.3159	8.77113	9.81298	10.0549	10.1141	9.97548	10.1718	10.4228	9.62618	8.97327	10.7912	9.92547	9.3287	9.25124	9.86967	10.177	9.05905	9.1274
ACVR1B	9.26169	8.91887	9.16143	9.21568	9.5423	9.64525	9.80493	10.6338	9.2266	9.55044	9.26302	9.2587	9.14021	9.23897	9.22426	9.09774	9.2813	9.8389	9.82799	9.73322	9.56746	9.46314	9.56656	10.6144	9.80866	9.46093	9.59615	9.6831	9.43387	9.34276	10.8143	9.47955	9.89616	9.67528	9.22623	9.01308	8.58354	9.08547	9.26175	9.74435	9.24881	9.44793	8.92318	9.03333	8.84416	9.38955	9.66302	8.83657	9.31329
ACVR2A	7.90347	8.91507	8.46244	8.69318	8.4519	9.42113	8.32317	7.98283	8.13081	8.23966	8.44461	8.34573	7.90285	7.53154	8.02723	7.65383	8.37306	8.35399	7.79122	8.82698	8.33283	7.83262	8.69132	8.2948	8.36357	8.38111	8.7971	8.46785	8.49139	8.70852	8.07958	8.68189	8.63967	8.45297	8.18542	8.67317	8.6047	8.55043	7.98015	7.62691	7.73759	8.39125	8.39602	7.8355	8.05157	8.45486	8.45536	7.69008	8.06626
ACVR2B	6.99621	6.83803	6.81081	6.68153	8.16088	6.81793	7.53499	6.81745	6.93434	6.99881	6.94387	7.31076	6.73308	7.08655	6.67865	7.20492	7.39954	8.02748	7.23636	8.14008	7.69868	6.85155	8.05456	8.60713	7.68097	8.60385	8.19719	8.15943	7.07723	6.87112	6.60595	8.3661	8.32946	7.78484	7.22246	6.86505	6.99002	7.34089	7.37751	7.29459	8.44648	7.29191	7.39969	8.10652	7.6366	7.26787	7.95709	6.82824	8.03699
ACVR2B-AS1	5.64638	5.56469	5.72127	5.36202	5.88633	5.2195	6.05637	5.76226	5.66663	5.56986	5.37859	5.44046	5.45132	5.3154	5.40951	5.54509	5.61124	5.58051	5.86764	5.64458	5.6751	5.58235	5.83948	6.0729	5.56711	6.89398	5.92305	5.72127	5.84242	5.80059	5.6148	5.85568	6.21521	5.4106	5.77122	6.05726	5.94886	5.53808	5.67348	5.61571	6.66931	5.82466	5.9367	6.32042	6.6343	5.56739	6.14996	5.88072	5.81801
ACVRL1	7.05138	7.00608	6.47529	6.39949	6.204	6.99505	6.02505	6.68062	7.29223	6.97074	6.52041	6.3628	7.2686	7.2426	6.48909	6.35217	5.8025	6.51163	6.45456	6.40952	6.30428	6.78838	6.20797	6.46976	6.48604	6.30735	6.49473	6.28616	6.81019	6.74716	6.86463	6.35888	6.3446	6.4579	6.32873	6.16603	6.07435	6.16174	6.55115	6.63347	6.15065	6.32264	6.80636	6.11042	6.49053	6.15045	6.18117	5.71248	6.16758
ACYP1	7.34396	8.29241	8.8168	8.95918	9.57248	8.51844	7.82717	8.01378	8.16809	7.98193	8.94326	8.97788	7.41587	8.31643	7.86428	10.3544	9.80988	9.17505	9.17896	8.48978	9.00337	8.90259	9.05125	9.74635	8.59285	8.87662	9.64657	8.40101	8.78006	8.00975	8.5921	8.2347	9.1332	8.45232	8.51866	9.1882	8.85232	7.88841	8.75465	7.85781	8.62662	9.11579	10.0053	9.72068	8.70923	9.29586	9.24435	8.72997	9.18226
ACYP2	7.77941	8.26875	7.82055	7.569	8.20527	7.06007	8.49813	7.71107	8.14385	7.79682	8.10373	7.96362	8.21937	8.15557	8.12699	10.0425	8.20656	7.39891	8.76961	8.58169	8.49306	8.27005	8.3289	7.95473	8.33309	8.0293	8.35854	8.2952	8.1104	8.00273	8.03152	7.2511	7.99839	8.56194	8.44583	8.26696	8.03136	8.16618	8.4214	8.18845	7.90318	8.08501	9.51673	7.61422	8.30387	8.21238	8.11962	8.38857	7.61078
ADA	9.11222	8.97883	8.02176	7.85868	7.27647	9.03881	7.68876	6.92251	9.10705	8.96762	7.64688	8.23547	8.52747	8.75138	9.28705	7.09869	5.89751	6.80117	6.58085	8.49523	7.43984	7.69035	7.65059	6.12155	6.69722	7.51734	7.38495	8.64922	7.86171	8.24099	5.73528	7.50253	8.7008	8.28832	6.9572	7.2322	6.48879	6.49793	7.73312	7.50949	6.54841	6.48151	6.85149	6.25268	6.76836	8.11328	8.44429	5.93168	6.67369
ADA2	9.84377	11.4671	9.03057	8.60499	7.32713	9.57228	6.49758	9.10755	10.5045	9.79317	9.5615	10.0621	11.5917	11.4675	10.9642	7.08493	6.54267	7.13431	8.11853	9.25889	7.27967	11.0365	7.67683	6.61984	9.92999	8.68249	6.82838	8.2855	10.0133	9.80462	9.42001	7.34072	6.56859	10.2135	8.88398	8.16883	8.20298	7.96297	10.9677	9.99316	6.47783	7.15333	6.82752	6.86523	6.57687	6.95307	7.24959	8.4999	8.46244
ADAM10	11.316	11.6379	10.8758	11.4547	11.4586	11.0516	11.322	11.1318	11.3625	11.5767	11.2598	11.4473	11.835	11.9381	11.6621	11.7946	11.3749	11.3828	11.29	11.3109	11.2163	11.7251	11.3275	11.2078	11.9141	11.0925	11.5699	11.712	11.6044	11.8255	11.1407	11.8648	10.7223	11.1904	11.5556	11.7446	11.6275	12.0287	11.7146	11.477	11.3676	11.5665	11.0655	11.4238	11.6478	11.8604	11.4399	11.5343	11.0928
ADAM11	5.56006	5.43298	5.37334	5.49251	5.40069	5.28355	5.68401	5.43415	5.55853	5.79936	5.09391	5.17258	5.70759	5.78861	5.46136	5.51075	5.42298	5.32107	5.44882	5.5344	5.20306	4.9407	5.57833	5.57384	5.64544	5.39729	5.56132	5.52128	5.24275	5.61505	5.27896	5.53661	5.39215	5.51108	5.32044	5.17541	5.1492	5.66928	5.19185	5.45907	5.87826	5.67498	5.90105	5.44869	5.50695	5.75207	5.49251	5.53712	5.86506
ADAM12	10.9788	10.3949	8.26779	10.7451	6.191	11.0713	4.8126	8.57136	11.1451	11.1082	7.30012	6.51088	11.1348	8.61615	11.5642	4.80445	5.50766	7.66469	5.13553	5.54238	8.62434	8.94489	4.69228	5.44729	5.46123	6.30785	5.91241	6.02005	7.40156	10.3319	5.29969	6.29886	6.007	7.07533	6.48376	6.93066	5.15494	6.17037	7.09489	6.83639	5.0907	5.15098	5.34309	5.35484	5.82857	9.50415	6.14799	6.12303	6.03032
ADAM15	6.23787	6.24261	5.95174	6.02568	5.96411	6.0165	6.14289	6.09769	6.25205	6.42446	6.08123	6.05156	6.19564	6.08123	6.19131	5.9327	5.97123	6.40288	6.111	6.18109	5.73763	5.73803	6.10545	6.12155	5.91376	6.33149	6.06513	5.86321	6.06044	6.3826	6.34391	5.91911	5.99995	6.07033	6.07769	5.68198	5.99584	5.73951	5.88249	6.24585	6.09771	5.9208	6.10005	6.08902	6.52901	5.75419	6.07808	5.88953	5.49604
ADAM17	10.13	9.56348	8.79921	8.60469	9.1661	9.33539	9.15597	8.35699	9.55261	9.67014	8.90264	9.15209	9.59169	9.79881	10.1157	8.97638	9.05673	9.23906	8.45682	9.00272	8.78156	9.06391	9.06442	8.62209	9.0337	8.85679	9.1089	9.6065	9.22374	9.4584	8.36023	9.49354	9.11282	9.24241	9.33732	8.77022	8.93016	8.60402	9.23593	8.88579	9.02696	8.83281	9.13989	9.16144	8.91428	9.23264	8.86127	8.98101	8.97187
ADAM18	4.54825	4.32806	4.34429	4.73561	4.51144	4.37723	4.46286	4.35018	4.23808	4.44355	4.30897	4.44398	4.46955	4.55355	4.36119	4.52771	4.34817	4.28379	4.36562	4.35886	4.38038	4.28843	4.39149	4.50064	4.40747	4.50395	4.47193	4.45916	4.26426	4.47687	4.48076	4.26693	4.65186	4.39715	4.28153	4.31072	4.40222	4.5325	4.28152	4.64771	4.89766	4.37689	4.49047	4.43173	4.73929	4.28833	4.34237	4.57521	4.71633
ADAM19	6.91531	6.70096	6.18597	6.49329	6.30268	7.38109	5.99413	5.77442	7.39089	7.82409	6.41382	6.24874	7.47989	6.42723	7.17493	5.17093	6.38946	6.42593	5.72205	6.66125	6.28101	6.61882	5.86315	5.33607	6.21753	5.82829	5.6566	6.90228	6.85631	7.25101	5.10037	6.95428	6.1293	6.75344	6.38098	6.00359	6.96059	5.59047	6.43988	6.85668	6.24319	6.37444	6.27559	5.78789	6.49056	6.40716	6.27402	5.75382	6.61233
ADAM2	3.62303	3.64372	3.549	3.56006	3.6628	3.43053	4.4379	3.47466	3.40081	3.69325	3.47417	3.57102	3.51141	3.33557	3.57814	3.47421	3.65008	3.46771	3.57677	3.54024	3.58467	3.42249	3.65986	3.62559	3.42877	3.50908	3.50437	3.46953	3.52116	3.63682	3.70586	3.455	3.49678	3.54679	3.50433	3.43152	3.57705	3.52667	3.4382	3.53785	3.65771	3.45357	3.66315	3.83465	7.15882	3.67918	3.47228	3.56006	3.62066
ADAM20	5.88959	5.70363	5.99576	5.82333	6.22622	5.96218	6.17826	6.14252	6.04293	6.12934	5.84694	5.82255	5.78897	5.83936	5.97899	6.15275	6.00834	5.93978	6.13024	6.14542	5.98336	5.77165	6.08637	6.00461	6.06136	6.13351	6.24241	6.12195	6.04293	5.95585	6.14754	6.25616	6.00427	6.04293	5.99853	5.80515	5.77172	6.04293	5.84211	6.14789	6.16503	6.21455	6.34822	6.14692	6.31916	6.1641	6.09297	6.61079	6.36609
ADAM21	4.34443	4.19244	4.07493	4.19878	4.32909	4.13952	4.18814	4.21229	3.98374	4.11805	4.08667	4.14252	4.32364	3.97727	4.32346	4.40249	4.21183	4.1894	4.04375	4.15734	4.00706	4.32839	4.15364	4.30613	4.45194	4.19886	4.36275	4.3652	4.10402	4.15283	4.23797	4.58803	4.52857	4.37862	4.15454	4.18897	4.27481	4.1934	4.05708	4.45745	4.4894	5.23941	5.143	5.4329	5.5362	5.01271	5.0984	4.56472	4.74836
ADAM22	5.9581	5.43929	8.13443	9.16223	5.74424	6.09791	6.55327	7.0094	5.90303	6.26718	7.43985	5.2408	5.15674	5.30472	6.14646	7.78918	5.76251	6.94769	6.76054	6.66557	7.37365	7.93964	6.10254	6.32133	7.40681	6.60538	5.89892	5.94009	7.59424	8.58088	6.68822	5.44783	7.52447	6.53598	8.31227	8.63702	8.99537	8.84417	6.91599	7.13868	5.96739	5.88454	6.46654	8.08316	7.59966	7.71012	7.38442	8.41295	6.53033
ADAM23	5.59177	5.33716	5.1395	4.91646	5.05456	5.54208	5.75431	5.05599	5.84066	5.08306	4.90399	4.88903	5.30818	5.43984	4.79676	4.95272	4.91765	5.25783	4.92135	4.71484	5.09672	4.77241	4.89523	5.07812	5.15281	5.52762	5.16277	4.93932	5.01686	5.31101	5.10886	5.13887	5.32586	4.84248	4.94803	4.72584	4.85739	4.86742	4.66613	5.30401	5.68777	5.10027	5.21429	5.22479	5.8613	6.08385	4.99653	4.98949	5.16277
ADAM28	6.3235	5.96365	5.9611	5.71646	6.01661	6.09182	5.88818	6.07816	6.14143	6.5062	6.13549	6.06798	6.47733	6.8165	6.4339	5.71575	5.51377	5.8551	5.75592	5.78325	5.65819	5.79909	5.74137	5.96496	5.7873	5.95362	6.00141	5.64918	6.28475	6.26776	5.99867	6.02442	5.79469	5.8531	5.87587	6.04756	5.77291	6.18339	5.92739	6.27512	5.95305	5.53492	5.90593	5.9818	6.07188	5.77983	5.68214	6.13409	6.14873
ADAM30	5.50464	5.30931	5.15272	5.2042	5.37763	5.24662	5.41168	5.76275	5.35671	5.69444	5.38035	5.40152	5.34466	5.3482	5.14026	5.59376	5.46532	5.47045	5.39361	5.37257	5.44529	4.78887	5.42925	5.53471	5.36531	5.30708	5.85661	5.38472	5.15464	5.40412	5.77219	5.62051	5.49354	5.39513	5.373	5.34859	5.3308	5.39011	5.14691	5.22577	5.59782	5.22354	5.57472	5.02897	5.57279	5.25303	5.42109	5.62387	5.39011
ADAM3A	4.41837	4.542	4.47664	4.42079	4.52148	4.5078	4.48241	4.52393	4.38913	4.54564	4.39325	4.49026	4.77682	4.47996	4.37774	4.61519	4.33747	4.48533	4.38875	4.57885	4.38257	4.44194	4.62572	4.5078	4.46672	4.5078	4.80111	4.44709	4.52856	4.44609	4.91781	4.6649	4.50099	4.3755	4.42132	4.51666	4.5078	4.43452	4.40928	4.62045	4.71887	4.48702	4.49047	4.47412	5.03155	4.58668	4.66065	4.2771	4.86937
ADAM5	4.75057	4.78485	4.741	4.84988	4.7697	4.79457	4.88062	4.73565	4.72141	5.08855	4.59589	4.96171	4.80144	4.75869	5.01406	4.60382	4.7836	4.78499	4.65277	4.65482	4.60733	4.47538	4.72481	4.57809	4.70868	4.67975	4.90813	4.63496	4.52176	4.62651	4.53053	4.73491	4.79197	4.6346	4.54731	4.66909	4.60142	4.54545	4.69534	4.77184	4.97106	4.86155	4.68059	4.76246	5.09756	4.96047	4.8395	4.81777	4.8385
ADAM7	4.76694	4.77953	4.65259	4.56958	4.61457	4.58503	4.61226	4.89325	4.78095	4.76553	4.65719	4.75359	4.84081	4.74436	4.71592	4.91651	4.64501	4.75767	4.4952	4.63026	4.49785	4.56173	4.68123	4.73889	4.57939	4.65259	4.72656	4.6288	4.57837	4.4412	4.54072	4.54623	4.61122	4.65487	4.35576	4.28042	4.55041	4.56708	4.4424	4.74216	4.70199	4.61511	4.48836	4.65259	4.83213	4.74372	4.86804	4.85455	4.76951
ADAM8	8.86618	9.03208	7.44472	6.94326	7.37216	7.1473	7.47794	7.49346	8.8406	10.0429	7.4755	7.22522	9.44623	9.66963	8.82311	6.83247	7.26668	7.25011	7.4375	7.27075	7.30468	7.77757	7.49025	7.57376	7.54876	7.54384	7.78756	7.38554	8.09251	8.52996	7.52177	7.35685	7.32014	7.40754	7.61578	7.46194	7.32815	7.38717	7.95959	7.87817	7.09859	7.01068	7.07336	6.96251	7.36664	7.5386	7.10063	7.25225	8.17667
ADAM9	11.8578	12.4189	10.5504	10.5105	10.3729	11.9051	9.80357	11.29	11.7156	12.1385	10.7686	10.8086	12.4496	12.2601	12.0978	10.273	8.88731	10.0554	10.0289	9.67879	10.5139	11.3186	9.05652	8.9722	10.3443	10.0785	9.14154	10.8898	11.0475	12.0074	10.6659	10.2296	10.0692	10.5319	10.3263	11.0133	10.7014	10.6457	11.0423	11.3621	9.11714	9.10326	9.21082	10.3375	9.31891	11.2314	8.95178	10.6102	10.55
ADAMDEC1	10.5352	9.61227	8.04726	5.205	4.57725	7.24221	3.75624	6.95354	9.57804	9.55258	6.03125	6.87158	9.2053	9.95769	10.8189	4.25989	3.7609	4.22738	4.23633	5.07685	4.17385	6.89722	4.28296	4.02782	4.75227	4.59352	4.19382	4.76863	6.94835	10.4477	3.74746	3.90654	4.94487	5.90965	6.36768	4.31031	3.99508	4.73766	7.89271	8.35903	4.00019	3.97908	4.13495	4.27791	5.5362	4.95819	4.04274	4.70403	8.06806
ADAMTS1	11.22	11.1329	11.4609	11.6226	7.96938	10.5669	9.26481	9.92188	11.6104	10.5462	10.0491	9.91784	11.0729	9.48764	12.4126	9.4732	6.47621	7.89639	9.79294	9.9119	9.86128	11.4571	7.74218	7.90308	8.86897	8.107	8.01583	10.0877	11.6784	10.622	11.5788	7.77779	8.60306	9.54651	10.1028	10.9304	10.3778	11.4047	10.0776	10.1927	6.33206	7.44074	7.03855	7.37754	7.85006	9.5038	7.46422	10.705	7.8128
ADAMTS12	5.53417	5.33072	5.19316	5.15546	5.11599	5.16217	5.32888	5.2469	5.34121	5.50527	4.87702	5.07288	5.46443	5.61169	5.42168	5.43175	4.93526	5.24955	5.03928	5.26772	4.96101	5.14321	5.01387	5.15617	5.17513	5.34718	5.22574	4.94833	5.04903	5.43557	5.38623	5.20498	5.19287	4.97867	4.99388	5.0347	5.05777	4.96055	4.92171	5.27628	5.42577	5.11212	5.39598	5.63093	5.5174	5.31537	5.35366	5.42896	5.15356
ADAMTS13	7.06172	6.87739	6.8977	6.75911	6.71173	6.55356	6.66402	7.09359	6.91108	6.9667	6.65684	6.66332	7.0221	6.83509	6.81178	7.09469	6.61749	6.77331	7.01192	6.77398	6.75769	6.68187	6.94345	6.94791	6.7257	6.88201	7.07627	6.69242	6.73925	6.9543	6.8405	6.76837	6.57134	6.82309	6.83937	6.59764	6.58319	6.8854	6.56864	6.92411	7.06599	6.75967	7.32512	6.9952	7.09938	6.81849	6.75911	7.19025	6.9505
ADAMTS2	7.3561	7.46494	6.75968	6.95354	6.99778	7.17191	7.30799	6.97249	7.26325	7.32706	7.10733	7.04024	7.20726	7.12114	7.25774	7.1264	7.05628	7.0081	6.86459	7.01202	6.89053	7.02104	6.99896	6.97087	6.91342	7.32372	6.78119	6.67252	6.83295	7.20394	6.82254	6.6216	6.93021	7.04181	6.96968	6.8251	6.96125	6.93487	6.76826	6.80911	7.22091	6.86656	7.13471	7.33889	7.26187	7.28264	7.13865	7.31789	7.45758
ADAMTS20	3.75908	3.58817	3.69931	3.56858	4.10774	3.65057	4.13692	3.62736	3.47194	3.77338	3.5528	3.74192	3.73614	3.71453	3.68814	4.33057	3.90766	3.79381	3.57788	3.59512	4.13482	3.43496	3.65723	3.83126	3.62461	3.85595	3.58736	3.7691	3.53007	3.78256	3.52504	3.52504	3.84029	3.91567	3.56851	5.72693	3.75523	3.54867	3.58772	3.51805	3.69788	3.59813	3.72874	4.47891	5.48137	3.84296	3.81079	3.91018	3.96868
ADAMTS3	7.08249	6.95958	8.72621	7.47458	8.24998	7.4575	9.0029	6.19645	7.7308	7.22509	8.87913	7.68228	6.739	4.69086	8.00452	9.27236	5.43037	8.42454	8.4359	8.63266	6.82906	7.80127	7.50979	9.61128	8.14059	7.24111	7.94366	7.9575	8.29835	8.78941	5.56962	8.06605	7.36342	6.59363	8.39507	10.1357	8.22808	6.85129	8.36888	7.13117	7.66332	8.03561	8.71246	8.63725	6.0865	7.45129	6.8207	7.0054	8.99637
ADAMTS5	9.80045	9.34022	11.3479	12.003	10.5131	9.16454	10.1097	8.87841	10.9398	9.98155	12.4828	10.7989	9.9579	8.59338	10.0046	11.9537	9.60776	11.6461	10.3702	11.7075	11.2314	10.7198	11.2098	7.70701	11.3114	10.382	10.1956	11.2318	10.8104	10.5336	8.43663	11.6555	7.44023	11.2595	10.6184	10.5673	9.87071	10.444	10.5558	9.68376	11.1892	9.50423	9.26966	11.7549	9.47745	9.16264	11.2919	8.63514	9.95681
ADAMTS6	4.17399	4.37402	4.22659	4.21394	4.17861	4.15625	4.51582	4.25022	4.55955	4.43596	4.02782	4.00743	4.37466	4.19309	4.12079	4.27146	4.11876	4.17399	3.94448	4.11042	4.09998	4.17399	3.96857	4.13651	4.0815	4.15947	4.26703	4.02212	3.99516	4.23607	4.01539	4.1721	3.98976	4.06545	4.07612	4.26858	4.12232	4.0291	3.81758	4.19655	4.4495	4.20039	4.3779	4.33442	4.45022	4.18607	4.2156	4.14257	4.28369
ADAMTS7	6.97908	7.12732	6.74264	6.76724	6.77463	6.80894	6.80309	7.11519	6.768	6.86253	6.59309	6.914	6.9506	6.97495	6.71001	6.98465	6.69837	6.84154	7.27047	6.86659	7.01296	6.97495	7.02011	7.39691	7.25295	7.14738	7.40363	6.97429	6.95934	6.97495	7.56363	7.03799	7.12469	6.84616	6.82024	6.79652	6.80482	7.12365	6.71328	7.45509	7.68979	7.14248	7.1057	6.65892	7.33704	6.94081	6.97495	7.44684	7.16561
ADAMTS8	5.60009	5.53454	5.43751	5.44768	5.29429	5.52261	5.46646	5.82875	5.37796	5.61286	5.38542	5.40912	5.46483	5.40454	5.42487	5.50876	5.47609	5.67677	5.51503	5.45887	5.39257	5.34186	5.37096	5.59023	5.62132	5.55984	5.73288	5.6943	5.46547	5.32762	5.92574	5.37737	5.67062	5.34144	5.68001	5.88369	5.52146	5.51975	5.33449	5.48302	5.68552	5.54178	5.51538	5.45296	5.66294	5.58488	5.49996	5.51538	5.50412
ADAMTS9	6.25293	5.45771	5.43339	5.2691	5.04047	4.79914	5.14386	5.21181	6.45094	5.92145	5.56534	5.37727	6.0133	5.53456	6.65566	5.02587	5.16819	5.2329	4.79024	4.80656	4.61554	5.30895	4.93065	5.292	5.36919	5.33204	5.04548	4.89892	5.00165	5.13098	5.33499	5.2427	4.68742	5.15796	5.21716	5.53863	5.60697	5.73025	4.99595	5.32078	5.40408	5.50253	5.32634	6.36074	5.71465	5.15181	5.3448	5.71897	6.02772
ADAMTSL2	5.97772	5.41585	5.96772	6.22558	5.13629	6.03509	5.28969	5.99258	5.60358	5.77336	5.7119	5.61207	5.49513	5.7379	5.81205	5.19471	5.38252	5.74579	6.1041	5.59921	5.59554	6.55679	5.41393	5.63864	5.68232	5.90657	5.83017	6.12049	6.28288	6.20345	6.14039	5.70076	5.52787	5.49278	5.86474	6.25516	5.50922	5.87672	5.68114	5.63666	5.35074	5.18654	5.78366	5.64689	5.73011	5.54415	6.19058	5.65614	5.64848
ADAMTSL3	8.05515	8.30981	9.90461	7.01846	6.38754	8.67558	6.19129	7.59164	7.13446	7.05541	9.03283	7.72815	7.11694	5.73752	7.11574	5.47917	5.57011	8.07644	5.91353	8.33595	6.68527	8.70906	6.4161	5.16735	6.42873	6.31051	6.1186	8.58603	8.88257	7.72949	7.37466	7.78545	5.90528	6.32598	7.83444	6.87481	8.67483	6.0491	6.84337	7.63508	5.4138	5.37782	6.34365	6.865	6.02881	7.24576	6.74758	8.25908	5.43644
ADAMTSL4	5.33266	5.48473	5.22541	5.44028	5.12883	5.48006	5.00466	5.26686	5.77325	5.78911	5.61744	5.22235	5.30999	5.33006	5.22405	5.04956	5.08161	4.94659	5.09055	5.04	5.06001	5.09043	5.34469	5.31315	5.22694	5.25637	5.387	5.07793	5.11646	5.371	5.23351	5.0508	5.02404	5.08659	5.10204	5.29599	5.27495	5.11782	5.19289	5.13566	5.53731	5.19253	5.03936	5.15571	5.29236	5.14482	5.06183	5.57498	5.75811
ADAP1	8.14782	8.29882	7.5405	7.3755	7.09523	7.82244	7.55563	8.3146	8.13968	8.19407	7.62279	7.51609	8.40878	8.36346	8.04974	7.43667	7.18734	7.03908	8.13207	7.09819	6.84372	7.80878	7.03078	6.81132	7.45974	7.19654	6.92531	6.94101	7.95331	8.03221	8.49363	6.98095	6.81371	7.44008	7.45443	7.85414	8.29541	8.52572	7.65775	8.33386	7.21455	7.20227	7.02061	7.2324	7.34835	7.41589	7.41691	8.66821	7.36658
ADAP2	9.18443	10.0456	8.21351	8.32169	7.12006	9.10623	6.98903	8.33378	10.2643	10.1507	8.92628	9.29123	10.1227	10.9929	10.1901	7.34591	6.885	7.24776	7.12597	7.97497	7.05528	9.1686	7.40875	6.84193	8.42909	7.72314	6.73324	7.41787	9.39192	9.49888	7.1106	6.9667	6.65161	8.45675	8.11965	8.43787	8.62882	8.40722	9.12856	9.3589	5.88095	6.7382	6.7334	6.66133	6.77898	7.85048	6.89279	8.4279	7.8793
ADAR	10.7566	10.7144	10.5848	10.6614	10.8534	10.9104	10.5107	10.5179	10.7818	10.6473	10.643	10.8498	10.5927	10.9016	10.7662	10.0219	11.6199	10.8472	10.5965	11.5524	10.4098	10.7709	10.628	10.7505	10.6031	11.0001	10.5432	11.002	10.7245	10.9163	10.6117	10.8785	11.0368	11.002	10.8536	10.8047	11.5044	11.0103	10.8636	10.6276	10.6668	10.7569	10.0919	10.8284	10.1803	10.7499	11.0053	10.3778	10.6492
ADARB1	8.44303	8.14751	9.25678	8.36744	7.43608	8.40789	8.44395	7.13058	8.79796	7.25868	8.87493	8.23817	8.24167	7.91269	8.19796	6.95307	7.75439	7.37576	7.48252	8.32118	8.38779	7.95872	7.57739	7.63633	8.85229	7.64089	6.95838	8.30115	8.38421	8.66886	6.92273	7.02548	7.07336	7.70128	8.61868	8.15299	8.37818	9.05731	8.14491	7.85196	7.8712	7.53825	6.67693	7.73307	5.47332	8.3265	7.81199	7.90546	7.59438
ADARB2	4.40637	4.29183	4.22293	4.32582	4.39718	4.24384	4.37298	4.51633	4.42741	4.46155	4.22199	4.35757	4.28609	4.30718	4.3167	4.34749	4.52099	4.35412	4.42705	4.19812	4.331	4.27866	4.29429	4.3491	4.2875	4.42297	4.2714	4.22477	4.34184	4.22393	4.50991	4.24151	4.30431	4.17649	4.14096	4.29969	4.38398	4.37035	4.2379	4.4935	4.67711	4.3981	4.46454	4.41782	5.11959	4.53422	4.49615	4.80878	4.68563
ADAT1	8.17155	8.24819	7.92435	7.62072	7.61437	8.21916	8.68709	7.69079	8.14232	7.44768	8.17047	8.36952	8.50335	8.26016	8.31265	8.25666	8.31174	7.88988	7.95179	8.25471	8.4477	7.90197	8.00823	7.28064	8.38042	8.29117	6.73362	8.03815	7.98038	8.03421	8.05059	8.3044	7.96906	8.38241	8.28777	7.96508	7.06877	7.37709	8.12766	7.77938	8.44511	8.54805	8.14278	6.92606	6.77643	8.00014	8.13795	7.01833	7.48301
ADCK2	8.30359	8.66684	8.25282	8.37405	8.16807	8.76003	8.18039	7.74341	8.48178	8.746	8.29659	8.10416	9.15629	9.56353	8.89918	8.18006	8.48275	8.1503	8.32008	8.4249	8.24151	8.38289	8.09266	8.17388	8.11765	8.52227	7.76775	8.4118	8.50579	8.31756	8.11519	8.38349	9.17915	8.5281	8.26216	8.57141	9.17225	8.50508	8.87156	8.36932	8.1899	8.26383	8.32699	7.99122	7.66741	7.79099	8.10184	8.83609	8.92083
ADCY1	6.81686	6.31269	6.93662	5.89742	6.75227	7.56315	7.00686	5.95467	6.79175	6.19198	7.28797	7.80426	6.55726	7.0649	5.84249	6.92441	7.53946	7.51567	6.43267	8.94874	8.36642	6.89639	8.03759	7.04017	7.51624	8.02182	6.74838	9.65575	7.16913	5.79595	6.26473	6.96125	8.43348	8.67061	7.8207	6.21959	7.95029	8.18711	7.21648	6.85446	9.03651	7.51395	6.83265	6.86692	6.73842	6.46209	8.71322	6.94173	6.89313
ADCY10	4.53312	4.40266	4.4551	4.49597	4.62691	4.58533	4.70268	4.49047	4.32515	4.70713	4.33283	4.41756	4.44995	4.45546	4.54826	4.54871	4.57519	4.39829	4.5089	4.40876	4.49923	4.32215	4.60965	4.44627	4.35844	4.61376	4.43874	4.49923	4.2922	4.3242	4.49923	4.6681	4.60676	4.3274	4.32023	4.31071	4.36574	4.30086	4.33387	4.52585	4.57456	4.57789	4.21138	4.63035	4.75809	4.39874	4.54911	4.8327	4.54659
ADCY2	7.08629	7.19971	9.43949	7.61818	10.342	7.80301	11.665	6.35766	7.33758	7.08132	8.23797	7.19898	6.41301	6.61693	6.69864	9.47247	7.11546	8.84798	8.58546	7.74208	8.19887	6.68561	9.60096	9.48165	7.88097	10.435	9.31439	7.61511	8.04982	6.1938	6.62412	9.96021	6.86611	8.13427	8.25433	7.72023	9.482	7.57075	9.24738	7.67621	10.1126	7.76843	9.70221	9.183	10.9502	7.57109	8.96075	8.00631	8.46729
ADCY3	7.76207	7.99788	7.89793	7.60023	7.29147	7.79023	7.35639	7.32424	7.63867	8.0486	8.01323	7.77606	7.8971	8.20673	7.70465	6.71911	7.58612	7.50258	7.21772	7.72789	7.29585	7.47567	7.64387	7.02679	7.57175	7.29266	7.40876	7.77602	7.66996	7.70277	7.38596	7.51439	7.25011	7.49113	7.60897	7.52579	7.84042	7.67472	7.84388	7.78355	6.964	7.0611	7.29859	6.90434	7.07548	7.71082	7.46163	8.64008	7.40096
ADCY6	7.78904	7.65522	7.9524	8.02094	7.6206	8.12709	7.53011	7.91123	7.84909	7.83895	8.09847	7.67368	7.26467	7.17033	7.3942	7.56065	7.42022	8.09332	8.09808	8.00225	7.89138	8.20098	8.25309	8.23595	8.35799	7.67503	7.94456	7.52802	8.02853	7.88087	8.28608	8.01342	7.38175	8.04744	7.55457	8.07678	8.16389	7.6198	8.28705	8.33939	7.72317	8.59231	7.79738	7.97449	7.90408	8.31451	8.07739	7.68904	7.66458
ADCY7	9.21327	10.0839	8.79476	7.65586	6.26837	9.24774	7.69957	7.16603	9.38131	9.39345	8.406	8.76872	9.79174	10.2369	9.73749	7.06823	6.26565	5.46928	7.19468	7.50363	6.89393	9.24398	7.01568	5.78373	8.04715	6.94795	6.06465	6.94103	8.99728	9.38883	5.13614	7.80406	6.81239	8.10963	7.71215	8.95703	9.1067	8.60521	9.57548	9.38419	6.32563	7.29559	6.70061	5.66981	6.44901	8.48311	7.64681	8.27654	6.99285
ADCY8	4.89266	5.06958	8.33917	4.86173	4.97748	4.84235	5.07115	5.31741	4.93827	5.13119	4.81928	4.8655	5.14906	5.24502	5.10777	4.97576	5.05587	5.39757	5.35737	5.06427	5.08194	4.53621	4.92443	5.57534	4.98253	5.03774	5.4149	5.00023	5.02735	4.75154	5.34243	4.95157	4.90025	4.87252	4.8907	4.99296	5.25181	6.20627	4.75809	4.79261	4.74012	4.81436	5.03715	4.93853	5.76911	5.15528	4.85473	5.13975	5.28002
ADCY9	8.85735	8.9709	9.05094	8.92115	8.16008	9.35432	8.57901	9.70503	8.90742	8.27626	8.96786	8.63506	8.70424	8.01011	8.42756	7.62816	7.10258	8.05559	9.13779	8.80638	8.26638	8.7929	8.35083	7.17567	7.30352	9.73828	8.59771	9.37844	8.88959	9.33179	9.67584	8.79961	8.60879	8.26888	8.66199	9.11043	8.90185	8.01141	8.63767	8.99902	8.40092	7.1886	7.77578	7.14925	6.73311	9.25346	8.77058	8.37155	7.06346
ADCYAP1	4.84917	5.80197	4.58043	4.56092	4.668	5.67212	4.62544	4.70083	4.87829	5.11181	4.52896	4.42164	4.95871	4.52243	4.64062	4.46518	4.57201	4.45274	4.49691	4.51092	4.60423	4.68474	4.58524	4.71882	4.56943	4.68582	4.35866	4.72915	4.66194	5.57212	4.75693	4.58774	4.52216	7.24384	4.44908	5.20396	4.53138	4.4046	4.44051	4.95775	4.80571	4.6758	4.51322	4.47102	5.86779	4.68444	4.67761	4.62544	4.66536
ADCYAP1R1	4.38379	4.8394	4.42446	4.70967	4.49745	4.37758	4.51625	4.39036	4.68666	4.83344	4.51213	4.28089	4.83392	4.76099	4.68602	4.53109	4.62472	4.45081	4.34723	4.63907	4.34587	4.54534	4.47024	4.54941	4.51361	4.3745	4.49783	4.33302	4.39474	4.56058	4.50626	4.47677	4.35197	4.40728	4.33827	4.23409	4.35243	4.46809	4.31131	4.04983	4.51688	4.51561	4.58124	4.48142	5.03716	4.4749	4.73314	4.55007	4.54129
ADD1	10.8847	11.1431	11.8166	11.8831	11.1076	11.2365	10.8447	11.2248	11.2111	10.7142	11.3848	11.0803	10.7722	10.8508	11.0651	10.3318	11.2537	11.2362	11.2819	11.7841	11.3943	11.4415	11.3572	11.0104	11.1497	11.7476	11.2655	11.9181	11.5577	11.2915	11.1181	11.1701	11.1903	11.2545	11.6392	11.5059	11.5191	11.0391	11.4689	11.2044	11.174	11.5361	10.7937	10.9165	10.7452	11.3237	11.2389	10.739	11.0229
ADD2	6.74971	5.86551	7.20118	5.44134	9.30538	7.68108	9.66819	6.19312	6.10354	5.55644	6.96386	7.80404	5.90746	5.47132	5.80258	7.51549	7.57482	8.2222	6.95401	6.71815	8.46639	5.40822	7.22433	6.59123	6.77973	8.33409	9.00761	6.37977	6.22156	6.65412	5.95858	8.16251	6.86537	7.06135	7.58352	6.78254	5.3791	6.61932	7.61308	6.55361	9.22369	7.93307	7.18377	8.29768	8.97979	8.23822	8.34521	6.54746	8.01925
ADD3	11.3402	11.7708	12.7375	11.7359	11.2257	12.0543	11.1235	12.1986	11.6562	10.9309	11.9059	11.6258	10.7472	11.1551	11.3235	12.0333	11.5385	11.6304	12.0481	11.993	12.1502	11.8146	11.8072	11.4674	11.9567	11.6042	11.273	12.4994	11.7341	11.2111	11.9957	11.6471	12.1862	12.049	12.0636	12.861	12.7802	12.346	11.7063	11.7612	10.7421	11.9246	12.0175	11.5128	11.5713	11.2701	11.5139	12.4056	11.221
ADD3-AS1	5.91172	5.70583	6.36702	5.75545	5.86324	5.74262	6.08547	5.9623	5.68297	5.86285	5.96574	5.79706	5.89304	5.64366	5.77049	6.04959	5.70863	5.75789	5.92089	5.90504	5.99979	5.51903	6.04628	6.16076	6.02606	6.28779	6.01345	6.03414	5.7385	5.66871	5.79535	5.79814	5.76006	5.96326	5.84199	6.26213	5.97462	6.16164	5.65749	5.94752	6.29228	5.87411	6.22665	5.90504	5.98597	5.51934	5.86354	6.15185	5.83041
ADGB	3.89462	3.66624	3.67581	3.86314	3.93096	5.17222	4.1296	3.96138	4.05478	4.00129	3.94226	4.26132	3.80896	3.95213	3.97216	4.2744	4.30138	4.6195	4.05656	5.20431	5.04409	3.72045	4.77585	5.36089	3.88944	6.70188	4.0963	5.85548	3.82755	3.88838	3.71169	3.91327	6.44226	3.93799	3.75633	3.55516	3.68673	3.60985	3.79628	3.76479	3.90206	3.86729	3.97641	4.59235	4.18826	3.64649	4.0821	3.61071	4.7651
ADGRA2	8.71401	8.66748	9.67652	9.97315	8.18195	9.60566	7.32431	7.75472	9.17998	9.3458	9.00092	8.52384	8.53164	7.63853	8.87765	6.76377	8.99383	8.54575	8.31981	9.17224	8.29024	9.10524	8.8135	6.95539	8.13143	7.97069	7.94385	8.78843	8.9495	9.32217	6.79566	8.62112	8.36256	9.15073	8.92426	8.95513	8.39748	8.12754	9.00582	7.96873	7.85909	9.13273	8.27626	7.56644	7.04093	8.70022	8.68914	7.35006	7.41957
ADGRA3	6.89155	7.77058	11.0221	9.5304	10.464	8.95977	9.49831	7.62676	7.77468	7.9898	8.74433	8.67711	7.34659	6.32342	7.81564	9.55883	9.24158	10.3849	9.03681	9.10302	9.32024	8.89495	9.27552	10.4623	8.84065	9.00402	10.3024	9.10745	8.85502	8.57428	8.19553	9.60834	10.0353	8.89977	8.94283	7.85851	8.50056	8.19513	8.84745	7.89415	9.7656	9.24883	9.05819	10.3027	9.34339	8.88655	9.21212	7.72064	8.9278
ADGRB1	6.58841	6.4786	6.03021	6.22637	6.15008	6.10845	6.54103	6.56515	6.30844	6.72483	6.28863	6.40061	6.581	6.54037	6.31188	6.30547	6.62059	6.47635	6.47965	6.53721	6.26715	6.34227	6.6784	6.36914	6.53174	6.59434	6.55108	6.31504	6.22387	6.47965	6.69062	6.3661	6.44919	6.80846	6.2917	6.33037	6.37199	6.54733	6.30669	6.45524	7.07153	6.5021	6.50818	6.54008	6.9444	6.51915	6.70719	6.86087	6.9201
ADGRB2	5.50411	5.31168	5.30318	6.07737	5.56768	5.37781	5.67749	5.4257	5.36061	5.54151	5.29142	5.34534	5.46512	4.97477	5.28632	5.5229	5.89332	5.21866	6.5019	5.55577	5.36928	5.04228	5.70045	5.5437	5.46062	5.86285	5.55161	5.78625	5.42919	5.87981	5.46534	5.40368	5.65763	5.73759	5.97607	6.18228	6.33893	6.06368	5.53172	5.74578	6.7657	5.68804	6.08868	4.92227	5.96752	5.82235	6.05148	6.97811	5.84051
ADGRB3	3.55618	3.62562	3.56892	3.68039	5.0756	3.51158	5.84536	3.84581	3.76385	3.67824	3.70586	3.59426	3.7034	3.37728	3.5712	3.79105	3.64891	4.35392	3.64391	3.47735	4.74127	3.68606	3.5121	3.86787	3.4626	3.49831	3.72402	3.63519	3.65368	3.44599	3.65438	3.42113	3.51968	3.58709	3.78423	3.55508	3.70984	4.39653	3.59577	3.78623	3.74743	3.93662	3.87514	3.70586	4.78642	3.70586	3.6208	4.01736	3.7105
ADGRD2	5.98321	5.69299	5.83979	5.67097	5.55165	5.76321	5.84611	6.05777	6.28831	6.05744	5.91473	5.84005	5.94108	5.55071	5.96898	5.76238	5.91812	5.76956	6.53905	6.41349	6.13984	5.40401	6.20219	6.42597	5.94108	6.21278	6.62187	6.04249	5.73123	6.19441	6.57408	6.10322	6.09963	5.94108	5.84348	5.80377	5.96268	6.07824	5.61938	5.37822	6.32166	5.43673	5.50246	5.57821	5.959	5.68417	5.93546	5.98267	5.16277
ADGRE1	6.12174	6.07074	4.66066	4.8296	5.12012	5.6001	4.77382	5.00992	5.90867	5.93322	4.83632	5.10774	5.81913	5.88156	5.62766	4.8033	4.58217	4.74582	4.64544	4.92018	4.38702	5.02075	4.64209	4.99579	4.56024	4.83978	4.70703	4.46717	4.85996	5.10454	4.77703	4.5244	4.78816	4.76421	4.73964	4.92717	5.48847	4.97746	4.7399	5.56894	4.87136	5.02009	5.28127	4.92433	5.36484	5.09327	4.87963	5.69915	5.19483
ADGRE2	7.69837	7.48961	4.82855	4.65357	5.1127	6.68872	4.42977	4.78348	7.63717	8.33347	5.11861	5.88295	8.99207	8.4013	8.04818	4.12728	4.06799	4.31088	4.2473	4.76301	4.33992	6.84362	4.5109	4.41504	5.15511	4.49365	4.42085	4.66838	4.88177	7.12216	4.37375	4.16228	4.31964	6.11191	4.85817	5.32461	5.01242	4.43119	5.53358	5.50193	4.34674	4.09882	4.28596	4.28375	4.39749	4.81949	4.26742	5.29865	6.02588
ADGRE3	4.2572	4.56685	4.10644	4.06372	4.27608	4.07169	4.19361	4.15558	4.24472	5.02055	3.97061	3.95918	4.59788	4.34931	4.28302	4.22712	4.05723	4.24596	4.02218	4.12735	4.24785	4.19668	4.36333	4.22879	4.1666	4.19879	4.59821	4.18192	4.10493	4.38063	4.07207	4.33695	4.19218	4.19555	4.04594	3.9581	4.01469	4.12124	3.90791	4.17185	4.49216	4.01331	4.40671	4.49473	4.71576	4.09251	4.25297	4.69587	4.59774
ADGRE5	9.96173	9.04143	8.73231	8.2628	6.80908	9.00017	6.62277	8.16627	9.21041	9.0101	8.40456	8.28101	9.19698	9.49357	9.60224	6.84865	7.98641	6.86754	8.05776	7.95444	8.20922	9.29153	7.35176	7.14838	7.89603	7.42565	8.11747	7.87991	9.1798	9.03463	7.87647	6.84299	6.69679	8.26981	8.7515	8.37937	9.56128	8.90614	8.92037	8.2642	6.32325	7.315	7.5825	6.30447	6.38992	7.75734	7.74469	8.82861	6.88333
ADGRF1	5.14787	5.16217	5.00438	5.00983	5.24583	5.0243	5.50778	5.21064	5.16217	5.22553	5.16217	4.99759	5.18431	5.19986	5.1579	5.26434	5.11384	5.168	5.19435	5.16217	5.00034	5.13682	5.38175	5.53597	5.06993	5.3371	5.5372	5.16217	5.02346	5.14837	5.85289	5.21999	5.16384	5.26368	5.16217	6.08273	5.10981	5.22491	4.79724	4.99629	4.91719	4.99271	5.20637	5.01268	5.66195	5.09291	5.11809	5.19424	5.09415
ADGRF5	10.8424	9.70133	9.33616	9.80859	8.83201	9.71472	7.06985	10.8732	10.9558	9.77799	10.8835	8.87757	10.4916	10.3568	10.6355	7.76952	6.35033	8.16032	9.55686	9.06084	8.6076	9.89235	7.30497	6.54211	8.58035	7.79518	7.26382	9.33018	10.5099	10.5187	11.1745	8.72601	7.69706	8.43175	10.1113	10.767	12.6983	10.8693	10.0023	10.2667	4.24564	7.27964	7.27302	8.73872	7.23326	8.01796	9.02974	12.2105	7.11773
ADGRG1	8.7168	7.86829	7.56597	9.53685	7.30324	8.38949	9.26643	10.8716	8.81264	7.01843	8.10105	8.47376	7.86027	8.13074	8.44442	9.5659	9.0753	7.93694	9.98046	8.17571	8.78642	10.6805	8.07128	7.0269	9.43829	9.72374	6.97936	9.63514	9.93833	9.5737	11.5716	8.36234	7.82065	8.17689	10.0067	10.9808	11.1729	10.5037	9.51386	10.6501	9.67954	8.11026	7.48061	7.26464	8.84112	8.69482	8.84806	10.8646	7.27874
ADGRG2	6.9049	5.65706	11.9219	10.6374	12.2639	8.83461	9.89955	6.39408	7.24791	7.56542	10.707	11.1481	5.98413	5.07668	5.26072	12.1016	13.55	11.3369	12.4665	10.087	9.72419	8.65627	10.6575	12.3671	12.0109	12.6121	13.3251	11.6682	11.1145	10.1369	5.82159	12.2527	10.5434	10.273	12.393	13.0412	12.3267	12.0188	12.9099	9.09746	11.26	13.3552	12.8883	12.2765	8.43983	12.2903	9.59377	9.12886	13.1008
ADGRG3	5.88491	6.19426	5.5068	5.58844	5.96721	5.79693	5.67455	6.02209	6.13177	6.84322	5.97939	5.86363	6.35723	6.15195	6.37491	5.56223	5.87001	6.09765	5.84818	5.81774	5.46757	5.22541	5.74191	5.66661	5.5732	5.779	5.66203	5.53633	5.66104	6.18762	5.97939	6.06264	5.45462	5.7818	5.63606	5.48869	5.74822	5.85264	5.53409	5.8522	6.05126	5.57986	5.8421	5.9383	6.30687	5.78556	5.78454	5.83333	6.40673
ADGRG6	6.58038	6.9207	6.17278	8.54364	5.06155	6.85313	4.72989	7.84495	6.75943	4.59041	6.49197	6.33266	6.62741	5.9706	7.23652	4.3673	3.8567	4.23431	6.90901	4.95755	5.98694	7.64286	4.21003	5.32382	6.01269	6.04255	3.64136	5.66082	8.14068	7.19835	8.00196	5.37688	6.79509	6.79006	8.12843	7.26927	7.11413	7.23874	7.78528	8.07488	3.94286	4.30912	4.70185	5.01439	4.60583	5.38598	4.9741	8.46593	4.08059
ADGRL1	7.05244	7.11646	8.57115	8.55495	9.17416	7.82883	8.43492	6.67913	6.9375	7.04213	7.98841	7.98084	6.88437	5.77897	7.32593	8.54739	9.41642	8.73439	8.20079	8.50147	8.99891	7.9894	8.63362	9.39216	8.32537	8.28192	9.45535	8.56552	8.34033	8.23613	6.39571	8.79121	7.90149	8.0625	8.99684	8.38966	9.46223	9.78463	8.4177	7.8489	9.82044	9.04686	8.5641	8.27413	8.1417	8.93897	8.95165	8.39578	9.03034
ADGRL2	9.15385	9.8436	8.98664	10.2984	10.5269	10.0001	5.43774	9.77492	9.56764	9.37486	11.825	11.6916	9.18902	7.91574	9.51119	5.94806	10.4281	10.9566	10.0737	12.2011	10.5331	9.62463	11.9918	11.18	10.9509	9.8857	10.3366	10.2108	10.0456	9.1652	9.88936	7.35495	9.94211	11.7251	11.2764	8.69908	6.43235	9.27847	10.2198	8.9289	9.82943	11.2581	10.6938	10.9943	9.59745	9.33947	11.9589	7.25522	9.83092
ADGRL3	7.13754	8.32275	7.96609	5.68634	7.67506	8.24029	5.50917	6.76928	7.6406	7.72981	8.51853	6.57071	5.92678	6.77398	6.61989	6.94078	6.02503	8.31212	6.64345	7.99226	8.34177	7.02795	6.29485	7.87804	6.76105	5.71302	5.21816	6.06495	7.39472	6.34036	6.98392	6.07264	5.48357	5.73342	7.28057	6.89715	7.77294	8.01387	6.0991	6.71198	5.52715	6.28053	6.76955	7.24662	6.94078	7.21686	5.51944	7.21858	8.83493
ADGRL4	9.58878	9.36952	8.85094	9.28944	7.12642	8.99044	5.99673	8.30619	10.1593	8.91542	9.19495	8.21511	9.69514	8.86004	9.59328	7.41735	5.53938	6.98738	8.44824	7.88214	8.51364	9.19949	6.40351	6.51038	7.61267	7.24686	6.23276	8.25571	9.58653	9.57676	8.93064	7.05853	7.41735	7.75984	9.06558	8.94204	7.91669	7.71275	9.04255	8.60992	4.27358	7.2504	7.16542	7.30893	7.68788	7.0362	7.87481	7.51822	6.3883
ADGRV1	3.89953	3.67695	3.62841	3.61663	3.63952	3.52087	3.81814	3.58617	3.70515	3.85017	3.59193	3.76318	3.7572	3.63362	3.67571	3.87662	3.86126	3.56058	3.53842	3.7584	3.70685	3.70098	3.67695	3.42163	3.68477	3.6602	3.80348	3.75114	3.68357	3.61192	3.51366	3.53177	3.7194	3.57824	3.58445	3.58511	3.51555	3.58759	3.43765	3.42322	3.66884	3.85282	3.86249	3.90902	4.05256	3.73647	3.64072	3.67695	4.0563
ADH1A	5.05182	5.01951	5.34606	4.90231	4.87369	5.20281	4.72963	5.14967	5.21759	4.99233	4.9173	4.93418	5.09433	5.06575	5.09621	4.59373	4.63377	5.0577	5.32844	5.01951	4.81583	5.68067	5.08424	4.6113	5.01155	4.9988	5.06162	4.87675	5.93066	5.31892	5.33764	5.00594	4.44729	4.8444	5.02767	5.00258	4.8134	4.94863	4.92386	5.65721	4.6925	4.79486	4.92816	5.01951	5.08882	4.90513	4.75118	5.01951	4.93489
ADH1B	7.99094	8.35745	11.811	10.4844	6.6691	9.27011	3.66954	10.3996	11.6201	3.5893	11.6609	9.03017	3.4346	8.80525	8.63057	3.32521	3.32664	8.80073	10.5051	11.6033	8.63034	11.0015	9.88896	3.43038	10.7113	6.19036	9.52675	11.6478	11.5735	11.1013	8.03979	10.0902	3.51068	9.52227	11.2057	9.69077	7.53517	5.32709	9.24015	11.0114	3.57421	3.77299	9.67906	7.36833	4.22928	3.63826	8.21496	8.95213	3.44367
ADH1C	5.98846	5.07843	5.52247	6.62349	4.88918	5.83933	4.72796	8.20146	7.31523	4.99629	5.8735	5.10654	4.98754	5.07891	6.29334	4.37341	4.65794	5.45549	6.00349	6.45148	5.06945	7.26366	5.13128	4.73642	5.95269	4.63773	5.45294	5.5287	8.32248	6.12647	8.5144	5.1231	4.76553	5.37752	5.95164	5.64024	4.70666	4.51021	5.37126	6.61862	4.70561	4.55644	5.16164	5.56136	5.26481	5.18371	5.05221	5.37015	4.44153
ADH5	9.55919	9.76899	11.0766	11.2601	10.7097	10.7392	10.9163	10.9102	10.196	9.40217	11.1186	10.3841	9.54367	9.62739	9.82069	11.397	10.7773	11.2042	10.9869	11.3819	11.6105	10.4496	11.3673	10.856	11.3992	9.53958	11.1107	11.5462	10.7379	10.3211	10.4116	11.5688	11.2661	10.9672	10.9968	10.7651	10.6809	10.5603	10.6903	10.2426	10.6038	10.9444	11.7215	10.8474	10.8116	11.0127	11.0033	9.75226	10.1066
ADH6	5.01535	4.97219	4.76906	6.66339	4.83825	4.52428	4.79972	9.15298	4.73104	4.93447	4.82633	4.6606	4.87514	5.00692	4.81123	4.79175	4.68255	4.73159	7.19067	4.6601	4.6413	4.90509	4.82062	5.05301	4.92716	4.73078	5.1075	4.57407	4.92763	4.69395	8.62234	4.8857	4.69702	4.61452	4.70598	4.50199	4.82347	4.80039	5.2483	7.96166	4.84691	4.59257	4.76002	5.07519	4.81886	5.07637	4.86286	5.32685	5.47829
ADH7	4.86701	4.71074	4.62331	4.60599	4.65367	4.83772	4.63413	4.65494	4.7993	4.69201	4.81052	4.7318	4.88013	4.78659	4.78051	4.5274	4.64318	4.75164	4.77863	4.78133	4.86436	4.88522	4.7187	4.85025	4.85322	4.90596	5.11677	4.82702	4.79198	4.80014	4.72997	4.75249	4.81492	4.68222	4.74368	4.84348	4.80615	4.78561	4.78744	4.74982	5.0066	4.82814	5.0033	4.99791	5.35424	5.00508	4.73848	5.192	4.71712
ADI1	9.4553	10.3427	10.5042	10.3308	9.83627	10.4349	10.2627	12.1729	10.4967	10.1794	9.62491	9.38814	9.82541	10.2618	10.4906	10.7408	10.1214	9.48187	10.8152	10.8645	10.2219	10.4134	10.589	10.2609	10.6025	10.0133	10.3175	10.3609	9.96508	10.6183	11.7257	10.2675	9.58369	10.3706	10.4065	10.5703	10.86	10.5302	10.5855	11.3482	9.78744	10.3241	11.2779	10.289	9.98151	9.39649	10.3113	10.1773	9.07593
ADIPOQ	3.7083	3.77192	3.6208	3.6842	3.44477	3.60139	3.57963	3.83153	11.3022	3.75602	3.55972	3.66009	3.65077	3.52429	3.81186	3.39675	3.42511	3.81499	3.57946	3.4613	3.4785	3.55353	3.73419	3.57249	3.52968	3.59682	3.60204	3.27585	3.54612	3.53418	3.80405	3.57301	3.7024	3.47711	3.44729	3.61342	3.72305	3.50485	3.59276	3.71408	3.87305	3.80144	3.639	3.70909	3.997	3.62783	3.58949	3.76607	3.69582
ADIPOR1	9.30567	9.49934	8.40988	8.34424	9.23551	8.86876	8.67095	8.8949	9.07708	9.28909	8.30667	8.61288	9.51735	9.62096	9.22208	7.91407	7.87561	8.70354	8.69613	8.43281	8.43281	8.8427	8.11379	8.81546	8.39454	8.65596	8.63019	8.77531	8.71341	8.99652	9.20308	8.7075	8.97926	8.71795	8.31369	8.48628	8.90579	8.78563	8.91263	9.07046	8.15052	8.29328	8.01333	8.96974	8.12401	8.81073	8.35499	8.47176	8.63794
ADIPOR2	8.89403	8.86836	9.11381	8.96805	9.20114	9.28914	10.2694	9.06272	9.04114	9.21338	8.93191	9.21264	8.8866	8.93759	9.06908	8.97713	9.44643	9.76112	9.04286	9.41012	9.16089	8.75359	9.4388	9.66881	9.69255	9.67066	9.20417	9.42808	8.97375	9.16577	9.17668	9.53576	8.07093	9.51131	9.08402	9.04654	9.36765	8.9851	9.2504	8.48853	9.63691	9.03969	8.97691	9.17529	8.97318	9.12496	9.26487	8.75141	8.60983
ADIRF	7.71178	7.76019	7.63205	6.6675	5.44072	7.16028	6.07227	10.1149	10.0274	5.98312	6.94968	6.93469	7.84827	7.7656	6.85719	6.57314	5.94043	5.96165	9.42237	6.0424	6.50259	9.34875	5.90734	5.97021	5.97581	6.77497	5.91794	7.19541	9.88151	6.31931	9.93621	6.3332	5.98616	6.96365	8.28793	6.10439	8.01645	7.36414	7.54225	9.6915	5.93552	5.87057	6.68859	6.15259	5.78302	5.93027	5.61014	8.95627	5.87032
ADK	8.98874	9.47799	9.05543	8.39535	8.62711	8.94736	9.47362	9.36851	8.80517	8.57617	8.47572	8.57646	8.97009	9.05918	8.73726	9.76562	8.53763	8.23246	8.73491	8.5853	8.89035	8.77626	8.53041	8.76835	8.48373	8.659	8.7308	8.90288	8.62332	8.62533	9.05198	8.65048	10.3744	8.2359	8.65841	8.66253	8.39499	8.46035	8.43662	8.50779	8.66618	8.18883	9.50593	8.18663	8.61111	9.0587	8.21481	8.49477	8.29803
ADM	12.2717	11.0959	8.66252	9.33613	7.62993	9.3201	6.89848	10.8156	11.0747	12.542	10.2231	9.29355	10.9455	11.8297	13.0302	9.07273	9.08543	7.13688	9.5894	9.53865	8.34806	8.74661	7.52952	7.81803	8.86646	8.29629	9.0653	9.8855	9.37459	9.70942	12.701	8.67995	9.25276	10.1577	9.07118	8.19702	9.07452	8.68009	8.54185	9.39784	5.6874	7.22294	7.00966	7.61968	7.56096	8.36256	8.14932	9.14868	9.91548
ADM2	7.03794	7.01065	6.73491	6.79448	6.78117	6.54939	6.87066	7.14541	6.90414	7.0951	6.62043	6.79781	6.79448	6.87391	6.85704	6.74395	6.8262	6.85201	6.82748	6.70162	6.40144	6.44465	6.78534	6.85962	6.66427	6.99102	6.99984	6.60207	6.73965	6.79916	7.12679	6.75641	6.84277	6.58107	6.5723	6.52997	6.57427	6.71241	6.36557	6.82335	6.93579	6.70661	6.92344	6.90594	7.16183	6.79448	6.45448	7.19914	6.80157
ADNP	10.1913	10.4656	11.6083	11.1255	11.9218	11.2345	11.9698	10.0752	10.2074	10.3394	11.4878	11.5412	10.0657	10.3371	10.5974	11.1669	12.1777	12.0054	11.3393	11.8136	12.0598	10.5323	11.8885	11.9765	11.6637	10.9231	11.8581	11.8637	10.8929	10.7114	10.4687	11.9561	12.243	11.7877	11.688	10.9553	11.3039	11.9234	11.2726	10.1502	11.6049	11.7485	11.1539	11.5655	11.4515	11.5205	11.7422	10.8437	11.8745
ADNP2	8.85918	8.74543	9.0721	9.33379	9.56218	8.97927	9.1939	8.82444	8.59009	8.62637	8.86295	9.07696	8.50624	8.36802	8.95699	8.9876	9.50251	9.77835	9.04605	9.13056	9.6292	8.57096	9.01245	8.71376	9.12495	8.89843	9.26799	9.0384	8.75913	8.7948	8.97101	9.34181	9.59112	9.39161	9.51638	8.64044	8.93445	9.36755	8.83232	8.40877	9.86107	9.00264	9.13826	9.00932	8.87693	9.30676	9.27784	8.61043	9.34965
ADO	9.01301	9.15564	9.26364	9.08036	9.25253	9.27112	9.63571	8.55204	8.73613	8.97939	8.99456	9.3075	9.0464	9.03068	9.05552	8.99663	9.58986	9.15764	9.13988	9.56034	9.69447	9.17511	9.30275	8.78207	9.26688	9.73201	9.47212	9.67216	9.41722	9.33122	9.16406	10.0984	9.86467	9.56687	9.38607	8.91775	8.97741	9.13631	9.50846	8.70965	9.33955	9.1233	9.39186	8.84062	8.44586	9.02477	9.321	8.3096	8.74358
ADORA1	7.20083	7.18964	6.96691	6.86552	7.08499	7.09478	7.18056	7.30053	7.22449	7.20477	7.12924	7.0705	7.33694	6.94795	7.14595	7.08305	6.83321	7.20873	7.25623	7.04916	7.01635	7.0878	7.15696	7.10278	7.11643	7.16467	7.35399	7.0705	7.04084	7.09317	7.76568	7.14509	7.05881	6.97322	7.12457	7.12966	7.30762	7.13545	6.94103	7.29881	7.38309	7.04028	7.06183	7.20949	7.61742	7.07545	7.42686	7.57871	7.31272
ADORA2B	8.1366	7.8929	5.44746	5.48832	5.86731	7.71196	6.5093	5.82144	6.25999	10.2661	5.16597	5.77488	7.39947	7.44466	7.556	5.30677	5.359	5.69971	5.01598	5.77254	5.69983	5.67133	5.71382	5.63871	5.60028	5.95342	6.61729	5.35504	5.3669	6.79694	4.98967	5.33914	5.42729	5.51864	5.38973	5.31479	4.80351	5.1132	5.45366	5.77488	5.70762	5.72075	5.88884	5.72123	6.44492	7.24797	7.09449	5.196	6.51297
ADORA3	7.51742	8.47647	7.03955	6.24617	5.95742	7.68945	6.26254	7.25963	8.66348	7.45415	7.21137	7.78788	9.46742	10.805	9.83695	6.11173	6.01653	6.04342	5.79336	6.23986	5.76622	8.13778	6.1174	5.81182	8.2458	6.45351	6.47507	6.76744	7.8593	7.62247	5.61285	5.58499	6.14257	6.63532	6.95829	5.91035	7.37085	7.81086	8.48087	9.45699	6.20519	6.63061	6.0118	6.32169	6.38734	7.07303	6.32022	8.11239	6.6134
ADPGK	9.61083	9.97397	9.17757	9.3558	8.95369	9.43952	9.4451	8.98479	9.94719	10.2282	9.24674	9.51262	10.1586	10.3752	10.1023	8.92868	8.97154	8.71818	8.90575	9.15609	8.89094	9.61433	9.21962	8.91995	9.74917	9.42473	9.0415	9.31393	9.55885	9.60712	8.8206	9.13672	9.01072	9.30811	9.15621	8.85752	9.23217	9.44438	9.53673	9.59994	8.90484	8.69523	9.388	9.18054	8.9815	9.21485	9.08204	8.87215	9.41909
ADPRH	6.38754	6.31499	5.85606	5.89015	5.64537	5.82061	5.84785	5.93907	5.81286	6.16015	5.84785	6.02698	6.04985	6.34647	6.37198	5.74781	5.76174	5.8714	5.67565	5.7205	5.67176	5.61673	5.68065	5.95793	5.77156	5.67292	6.04187	5.80993	5.63296	5.86283	5.81785	5.51409	5.74454	5.68318	5.56064	5.6423	5.43871	5.45994	5.66208	5.77346	5.86656	5.92627	5.54135	5.82858	5.88752	5.65818	5.66749	5.72235	5.62846
ADPRM	7.42378	7.5485	8.23749	8.00633	8.02668	8.17626	6.76367	7.52487	8.17036	7.34444	8.13447	7.79348	7.53799	7.68514	7.77606	9.2848	7.93408	7.77251	7.81038	8.26287	7.26027	8.09274	8.09425	7.78065	8.0108	6.01607	8.63702	7.70047	7.6146	7.56759	6.81443	6.7392	7.62431	8.13129	8.06628	7.73493	7.67235	7.5338	7.40966	7.82402	7.67976	8.06648	8.84152	7.50364	8.30003	7.85048	7.9358	7.56155	7.97611
ADRA1A	4.88604	4.8069	4.51572	4.52193	4.67244	4.53103	4.75078	4.56857	4.76564	5.13317	4.45477	4.54146	4.62286	4.68764	4.68646	4.62286	4.45954	4.47674	4.78811	4.54936	4.40692	4.55971	4.58979	4.69105	4.40256	4.59257	4.8202	4.58572	4.55921	4.64892	4.96175	4.65398	4.49391	4.28215	4.60429	4.39083	4.56539	4.61025	4.4611	4.17412	4.61538	4.57876	4.91224	4.81143	4.91144	4.64587	4.23374	4.87119	4.79669
ADRA1B	4.97922	4.92065	4.71447	4.7191	4.75844	4.7798	5.06001	4.89549	4.84947	5.01791	4.80544	4.7793	5.0598	4.77833	4.97584	4.73866	4.77071	5.08828	5.06439	4.83863	4.62589	4.6237	4.74435	4.69401	4.77818	4.72303	5.05404	4.85319	4.59803	4.75072	4.96714	4.74255	4.84462	4.80781	4.53265	4.65463	4.4653	4.70679	4.3434	4.83908	4.61959	4.50126	5.10837	4.97141	4.69856	4.60361	4.88197	4.80494	4.88476
ADRA1D	4.89173	4.74499	4.84333	4.68875	4.86712	4.85232	4.8126	5.00764	4.81047	4.96311	4.78811	4.83906	4.87775	4.83906	4.76199	4.9338	4.89804	4.69429	5.05124	4.74037	4.68908	4.82229	4.83906	4.95799	4.71209	4.88677	5.14543	4.78423	4.83906	4.61727	5.09486	4.91395	4.77325	4.70773	4.7164	4.77968	4.84422	4.8912	4.65975	4.83192	4.97106	4.82014	4.73734	4.8746	5.34951	4.57669	4.84136	5.196	4.99861
ADRA2A	6.17659	6.21986	6.94807	5.85453	4.56024	6.69046	5.07887	5.89554	6.90825	5.09619	6.34985	4.29624	6.25626	4.95047	4.78414	4.78642	4.04738	4.0519	5.67484	5.28476	5.74344	7.74479	4.37829	4.42842	5.34165	5.08166	5.31103	5.64598	5.99255	6.28431	5.37084	5.2919	4.32213	4.83109	5.25121	5.1571	4.97995	4.78648	5.90256	6.3129	4.87428	4.23076	5.0749	4.91403	5.13438	5.1302	6.22743	5.8835	4.93442
ADRA2B	6.63507	6.55199	6.58638	6.55253	6.5738	6.74325	6.62039	7.11923	6.8856	6.88882	6.76508	6.68748	6.6803	6.79614	6.83297	6.76777	6.5815	6.56524	6.99052	6.66557	6.60676	6.37343	6.66701	6.84612	6.65915	6.84836	6.94618	6.49116	6.46814	6.69102	7.14796	6.34617	6.75359	6.59578	6.48117	6.48426	6.58375	6.58805	6.15638	6.75859	6.5017	6.54796	6.66005	6.52266	6.81476	6.43192	6.50407	6.64829	6.52781
ADRA2C	6.99303	6.38105	6.50252	6.20675	6.87761	6.12864	6.74991	6.99162	6.66554	6.84422	6.2805	6.28639	6.52737	6.14837	6.6566	6.82174	7.49989	6.61222	7.27303	6.475	7.1018	6.67395	6.59478	7.23056	6.6048	6.92664	6.97155	6.47733	6.66127	6.56755	7.33626	6.51726	6.50998	6.33295	6.74991	9.05875	7.819	7.39526	6.951	6.67957	7.57981	6.63038	6.77539	7.34025	6.57928	7.04868	6.87732	7.7306	6.84756
ADRB1	4.44507	4.25611	4.12582	4.06193	4.17281	3.95566	4.25421	4.60909	4.28237	4.18353	4.14062	4.14066	4.30079	4.32484	4.29623	4.39579	4.03443	4.04847	4.27026	4.11498	4.11684	4.16502	4.03539	4.16037	4.05746	4.1035	4.14272	4.1035	4.13561	4.12798	4.49546	4.19815	3.95752	3.94066	4.10593	4.18861	4.09953	4.06432	4.08037	4.36577	4.089	4.13531	4.36618	4.15013	4.6664	4.21082	4.16502	4.8264	4.20653
ADRB2	5.31076	7.21932	7.14944	5.70549	4.48249	5.72681	4.51827	6.0709	6.8545	5.67689	6.01268	6.39994	6.94268	7.55506	6.99012	4.96716	4.36749	4.66718	6.1939	5.15836	4.68479	6.96422	4.82111	4.30301	6.45194	4.8248	5.05612	4.94197	7.02137	6.75093	5.1269	4.89405	4.73055	6.08984	5.74241	7.20556	6.28176	6.65851	7.28898	7.0665	5.65144	5.03483	5.48213	4.9123	5.24295	5.7531	4.94867	5.9573	5.36497
ADRB3	5.42837	5.70398	5.52245	6.60463	5.28384	5.47407	5.48268	5.48924	5.41451	5.48681	5.43567	5.48924	5.36613	5.8272	5.42546	5.37526	5.47274	5.6252	5.35624	5.74193	5.4989	5.33202	5.42231	5.23951	5.49245	5.91012	5.60334	5.54676	5.45208	5.64212	5.36013	5.33043	5.78857	5.36191	5.32201	5.49113	5.53727	5.33479	5.26162	5.4888	5.74926	5.52664	5.30741	5.45453	5.40038	5.67319	5.6013	5.70775	5.36534
ADRM1	8.5338	8.02865	7.64292	7.58242	8.10849	7.92221	8.45646	7.83	7.87683	8.27666	7.52288	7.60414	8.11335	7.91866	8.20549	7.34944	7.78142	7.74947	7.65006	7.83349	8.0011	7.41668	7.49125	7.55842	7.52384	8.90442	7.70738	8.02683	7.64234	8.08528	7.81171	7.8244	8.43576	7.54417	7.59547	7.74674	7.65541	7.8008	7.76248	7.99344	8.21099	7.56427	7.69518	7.72161	7.43784	7.99059	7.88364	8.1257	7.67394
ADSL	9.52513	9.71188	9.94503	9.84431	10.69	9.73466	10.2779	9.79917	9.86817	9.65943	9.98677	10.0436	9.54048	9.63543	9.70821	10.9949	10.266	10.9667	10.1118	10.1109	10.3768	9.69659	10.2961	10.5506	9.80456	9.97344	11.1219	9.27495	9.95927	9.33789	9.4718	9.39268	10.6484	9.91546	10.0016	9.57364	8.9268	9.73266	9.89745	9.32596	10.2169	9.70538	11.075	10.4114	10.7721	9.79497	10.1673	9.33611	9.98124
ADSS	9.67155	9.28834	9.4083	9.00807	10.2046	9.3488	9.66427	9.16139	9.40181	9.41352	9.3488	9.29795	9.43438	9.3488	9.43436	8.9487	9.57563	9.91726	9.1853	9.44091	9.45493	9.40292	9.06703	9.47776	8.86873	9.44782	9.29195	9.66229	9.22068	9.31512	9.40829	9.18014	10.1277	9.81601	8.85737	9.07633	8.12316	9.41469	9.01682	8.64037	9.04448	9.27434	9.09157	9.9938	8.87737	9.3488	9.75421	8.33299	9.64139
ADTRP	4.85484	5.06256	4.60421	4.58712	4.32705	4.54781	4.37347	4.98968	4.8486	5.38448	4.63024	4.80647	5.42906	6.04826	4.8416	4.59227	4.56322	4.44079	4.47323	4.19254	4.01335	4.64264	4.31974	4.33228	4.43348	4.41308	4.48409	4.12266	4.58143	4.73975	4.87767	4.33561	4.27724	4.23683	4.33698	4.16049	4.19783	4.28379	4.0801	4.98564	4.80966	4.54442	4.99373	4.67558	5.11111	4.44849	4.51636	4.73518	5.14728
AEBP1	12.3996	9.78174	10.2331	10.7222	8.402	10.6117	9.25116	9.83341	12.1201	9.39856	11.2872	10.5909	12.2423	11.0208	10.6177	8.60358	8.02784	8.92968	8.88877	9.52469	9.05427	11.5727	8.93311	8.14762	9.70948	9.50432	8.38516	9.88865	11.3543	11.2925	8.93854	9.58468	7.85335	8.37035	10.8271	10.1193	8.03231	10.8594	10.6979	11.4635	8.72584	8.6512	8.54436	8.39448	8.36699	9.42759	9.40229	9.02523	8.06808
AEN	8.22315	7.60445	6.81195	6.77642	7.94978	7.82428	8.41559	7.26045	7.50012	7.85266	7.67917	7.55198	7.75361	7.3526	8.28928	7.19642	7.29622	7.56871	7.11587	7.94242	7.28105	7.04526	7.55736	7.8285	7.98322	7.86515	8.38143	7.47748	7.37247	7.9606	7.35633	8.25147	7.24644	7.6122	7.56126	7.506	7.5752	7.38389	7.32676	6.77723	7.98046	7.29823	7.25398	8.02753	7.7952	7.34264	7.99694	7.58528	7.3807
AFAP1	6.99446	6.80021	7.08755	7.22277	7.04665	7.4768	6.34774	5.66045	6.71664	6.64	6.55599	6.95141	6.81832	5.43962	6.78275	6.17001	6.86858	6.64283	6.67654	7.2279	7.21799	6.74067	6.90438	6.59971	6.79867	7.01537	6.69937	7.67978	6.86643	6.86251	5.34557	6.7474	6.48577	6.9767	7.03201	7.71421	6.71903	6.00956	7.04461	6.62833	6.77224	6.97789	6.06885	6.69627	6.17285	7.07019	7.14451	5.26666	6.33674
AFDN	6.12824	5.88568	6.22818	6.56914	6.39298	5.95298	6.86079	6.34009	6.06464	5.97336	6.07548	6.54402	6.00338	5.77049	5.96646	6.39877	6.21656	6.63877	6.40266	6.10214	6.41746	5.8613	6.38473	6.70514	6.32225	6.1353	6.59302	6.37913	6.20838	6.39488	6.34666	6.2962	6.57802	6.21656	6.3425	6.02419	6.31599	6.29431	5.946	6.25868	6.61979	6.03948	6.01133	6.23078	6.20706	6.14718	6.01288	5.79934	5.9849
AFDN-DT	4.52553	4.63188	5.469	7.3345	6.3574	4.86263	7.92611	6.40645	4.9365	5.02651	5.14639	5.63175	4.63283	4.61594	4.76678	6.9079	4.58315	5.80127	6.51769	4.99258	6.23092	5.86424	5.57439	8.10801	5.29606	5.12177	6.158	4.61393	5.97601	5.28781	5.70403	4.66495	6.1972	4.97172	5.67823	7.87637	7.92373	6.56041	5.73948	6.22101	4.77902	6.24575	5.78805	5.51666	6.22799	7.04629	5.16293	6.81211	6.3673
AFF1	10.5379	11.0642	11.1242	11.0573	10.5784	10.4354	9.3517	11.471	10.8217	10.8003	10.8237	10.1487	10.6743	10.8246	11.0718	9.80434	11.0872	10.7265	11.0751	10.7304	10.9086	11.2894	10.3595	10.7532	10.5342	9.46651	11.0413	10.475	11.1849	10.7226	11.6884	8.22036	9.95535	10.4001	11.0775	11.9498	12.652	11.1951	10.8921	11.0099	9.3134	10.7913	9.5068	10.7931	10.5324	10.2452	10.6869	11.7989	10.2651
AFF2	6.32992	6.59626	8.52874	6.97986	7.79916	6.85525	7.67864	6.36363	6.33002	6.68029	7.3491	7.34709	6.68129	6.44343	6.29371	6.35746	7.98866	8.62593	6.78642	7.74173	7.58442	6.59386	7.10152	6.90834	6.72377	7.14256	7.6989	7.60776	6.5062	6.23885	5.82705	6.74145	7.08675	7.20383	7.08055	6.01592	6.3138	6.59399	7.08675	6.88654	7.74878	8.48738	8.07219	7.59731	7.0925	7.27766	8.50874	6.82141	7.37867
AFF3	5.67261	5.81068	6.44481	5.51249	6.37982	6.05876	6.4716	5.61537	5.48799	5.89761	6.2117	6.2389	5.94131	5.49734	5.7172	6.27941	6.59773	6.79527	6.15261	6.32099	6.54297	5.37058	6.57898	6.92295	6.42566	5.59426	6.67063	6.44284	5.88135	5.87414	6.03402	6.15631	6.09876	6.03194	6.66662	5.46098	5.35798	5.49123	6.03389	5.84019	6.79916	6.65642	6.17649	6.11861	6.30547	6.19024	6.47049	5.59404	6.46508
AFF4	7.06247	4.98091	4.57552	4.50877	5.07944	4.75833	4.80065	4.64909	5.10441	5.3701	4.45378	4.74366	5.64583	4.82558	6.57491	4.34286	4.87584	4.61588	4.62327	4.92331	4.74847	4.71029	4.51926	4.67849	4.75127	4.43513	5.2937	4.90072	4.76381	5.25412	5.43086	5.32274	4.79044	5.59464	4.58764	4.77575	4.4733	4.52983	4.63155	4.28016	4.85995	4.74185	4.404	4.71525	4.81247	4.82638	4.67123	4.67183	4.72004
AFG3L2	8.78675	8.35876	8.5804	8.97303	9.0445	8.72091	9.49246	9.38112	8.48664	8.71501	8.43078	8.71078	8.44523	8.76021	8.76477	8.81286	10.1265	8.86147	8.89626	8.8092	9.00974	8.29438	8.69673	8.91334	8.95804	9.08767	9.12788	9.22568	8.72702	8.71301	9.54695	8.53779	9.54828	8.62933	8.88558	8.77357	9.0108	8.77341	8.79411	8.66172	9.74834	8.95478	8.84221	8.74955	8.68801	9.02912	8.81003	8.65389	8.50453
AFM	3.64667	3.71733	3.56939	3.63944	3.83297	3.64555	3.69895	8.94441	3.71499	3.60405	3.52474	3.51902	3.76327	3.57418	3.4917	3.60903	3.60793	3.51063	5.96713	3.44041	3.44041	3.49777	3.4779	3.58022	3.53086	3.54646	3.62561	3.63925	3.53033	3.65154	6.59302	3.40372	3.65338	3.42978	3.69753	3.47837	3.51358	3.65816	3.83347	6.87437	3.95402	3.6456	3.42406	3.65756	3.88439	3.54554	3.54497	3.55674	3.4197
AFP	6.1449	5.73019	5.57229	5.76944	5.72882	5.71538	5.66626	5.82663	5.60184	5.83773	5.50357	5.59198	5.90138	5.42505	5.90653	5.40697	5.41854	5.28902	5.63586	5.38703	5.25828	5.37514	5.717	5.2948	5.47736	5.53296	5.60341	5.4174	5.30363	5.62387	5.84275	5.25477	5.58365	5.3084	5.41242	5.25843	5.60448	5.83417	5.28572	5.8231	5.92423	5.33116	5.72023	5.81713	6.10243	5.65617	5.55218	5.91206	5.69088
AFTPH	9.29967	9.36114	9.39188	9.48184	9.32424	9.19983	9.07707	10.7253	9.39357	9.60707	9.18615	9.2451	9.44438	9.87358	9.4102	9.07911	9.27578	8.98138	9.80221	9.11198	8.92118	9.51716	9.16866	8.63448	9.21119	8.77255	9.12531	8.92435	9.34028	9.21123	10.7953	8.92693	9.01659	9.16954	9.21466	9.52131	9.62688	9.48481	9.30413	10.0607	8.81656	9.3012	9.05478	9.08984	9.46997	9.14447	9.18828	9.63784	9.15167
AGA	8.66051	9.22883	8.48082	8.90036	8.55126	8.99628	8.12216	9.18327	9.33718	8.70965	8.19591	8.45238	9.58812	9.448	9.22039	8.84095	8.13453	7.96666	8.36475	8.51264	9.08876	9.44335	7.73267	9.18795	8.9553	7.97622	8.4436	8.32244	8.93935	9.01273	9.15306	7.73865	8.01757	8.14154	8.48602	8.64999	7.62656	7.93677	8.39379	8.1886	8.59643	7.61957	8.93625	8.67244	8.09472	8.51264	8.19719	8.47276	8.16316
AGAP1	7.32521	7.46229	7.97791	7.60515	8.22816	8.17726	8.7856	7.81477	7.42429	6.38955	8.01736	8.01801	7.00422	6.28697	7.17023	6.97679	8.20856	8.25559	7.64004	8.67181	8.60577	7.81789	8.79047	7.79738	8.15873	8.4513	8.36287	8.8438	8.08267	8.50489	8.06661	8.07438	8.53727	8.43635	8.5447	7.84421	8.82069	8.32209	8.16278	7.49747	8.47152	7.8793	7.2479	7.22416	6.72027	8.21882	8.29605	7.0855	7.15102
AGAP2	6.7244	6.4812	6.26173	6.22666	6.29194	6.31359	6.32444	6.57562	6.47648	6.80357	6.54122	6.22968	6.53601	6.45914	6.3708	6.26024	6.51319	6.4812	6.70169	6.58316	6.44326	6.31726	6.4559	6.53484	6.42596	6.62139	6.53489	6.37498	6.28339	6.47566	6.76889	6.55409	6.58676	6.38156	6.38112	6.16676	6.28729	6.42572	6.16712	6.77314	6.99844	6.36475	6.70478	6.74533	7.0238	6.59939	6.77251	6.69812	6.70108
AGBL2	4.87909	4.66544	4.93589	5.76606	5.07848	5.00021	5.41168	5.415	4.916	5.08851	5.42292	5.90943	4.70471	4.86873	4.86533	5.19692	5.58697	5.168	5.8949	6.28772	5.21565	5.5028	6.40184	5.08564	6.07337	4.76694	5.64378	5.91385	5.55946	4.61936	5.13306	5.16172	4.74664	5.84777	5.5302	5.79312	5.83234	4.53392	5.45519	5.01487	5.68419	6.20273	5.85928	6.12433	5.76752	4.68098	5.6566	5.74513	5.70772
AGBL3	3.19338	3.16859	3.47114	3.60025	3.5753	3.30912	3.38058	3.70631	3.35267	3.33491	3.42532	3.40834	3.31029	3.07754	3.30287	3.50489	3.45342	3.60999	4.01839	3.69745	3.39458	3.6253	3.56478	3.27708	3.46861	3.4943	3.34133	3.90057	3.64091	3.28513	3.44227	3.37467	3.47281	3.4943	3.7035	3.74741	3.52667	3.61148	3.82502	3.6582	3.78784	4.07173	3.72496	3.71081	3.48072	3.45194	3.47549	3.86027	3.45581
AGBL5	6.5713	6.70069	6.55505	6.77305	8.07489	7.13324	8.13409	7.31322	6.37448	6.39458	6.3176	6.36852	6.69099	6.10085	6.21002	7.841	7.40501	7.18072	7.65645	7.10702	7.50265	6.63003	7.12431	7.88013	6.81134	7.79192	7.71253	7.49083	6.88826	6.88626	7.38541	7.41163	7.94788	6.84667	7.03955	7.21433	6.91898	6.87941	6.98337	6.92342	8.15305	7.42531	7.81172	7.41789	7.60609	7.39204	7.44785	6.91544	7.82207
AGER	6.58085	6.59997	6.25363	6.10989	6.35574	6.33739	6.65669	6.86554	6.45796	6.73245	6.51966	6.51102	6.55472	6.53676	6.57963	6.31989	6.4975	6.49144	6.70548	6.48007	6.35326	6.38539	6.72328	6.61761	6.50235	6.83471	7.00586	6.37272	6.38154	6.47251	6.94962	6.5005	6.39407	6.48653	6.53645	6.44737	6.48272	6.42572	6.12036	6.59302	6.79689	6.38352	6.54887	6.58604	7.04928	6.35419	6.3356	6.87155	6.51443
AGFG1	9.74449	9.47898	8.94461	8.90253	9.63591	9.3093	9.67572	9.2389	9.48034	9.57351	9.03108	9.16001	9.51376	9.28611	9.67214	8.82624	9.07678	9.31461	9.11834	9.09174	9.11938	9.1816	9.02289	9.23639	9.10452	9.05274	9.05244	9.35563	9.2749	9.39488	9.02003	9.49297	8.92662	9.18315	8.98591	9.06184	9.58151	9.32828	8.99477	8.84702	9.31533	9.10965	8.96795	9.42602	8.86373	9.26066	8.9674	9.48885	8.87837
AGFG2	6.57176	6.4846	6.30535	6.3478	6.41468	6.23857	6.46068	6.54984	6.45116	6.54331	6.29693	6.27229	6.42248	6.54344	6.43697	6.5134	6.30706	6.31874	6.49484	6.69739	6.15403	6.23464	6.45182	6.6137	6.29927	6.486	6.57256	6.15109	6.29377	6.50569	6.58361	6.26127	6.45213	6.37544	6.11338	5.99186	6.14566	6.34237	6.15096	6.3129	6.42639	6.35514	6.35064	6.54008	6.79488	6.68277	5.97003	6.21084	6.64668
AGGF1	8.26882	8.65472	8.91489	8.88471	8.52087	8.84296	8.81506	8.15397	8.55918	8.223	8.66821	8.70848	8.4882	8.29819	8.63774	8.4034	9.55154	8.65943	8.63438	9.04207	9.11754	8.5993	8.96598	8.77614	9.05685	7.42837	8.35437	9.32008	8.66478	8.67858	8.27681	9.31145	8.29339	8.55568	8.66091	8.74139	9.24438	8.5448	8.91202	8.19875	8.62548	9.19851	8.77361	8.51735	7.98403	8.85827	8.79267	8.33619	7.92995
AGK	8.03718	8.01328	8.52806	8.50319	9.00017	8.56827	8.71173	8.24064	8.15616	8.2108	8.20182	8.5945	8.17734	8.01064	8.32385	8.43633	8.72061	8.87627	8.50828	8.54471	8.83394	8.10654	8.60511	9.03859	8.25864	8.60963	8.21386	8.71354	8.11235	8.24064	8.44493	8.9489	9.79908	8.95622	8.51263	8.00985	8.17885	8.29125	8.28619	8.20395	9.12938	8.73888	8.72424	8.97812	8.92752	8.13407	8.86791	7.88278	9.13124
AGL	8.91843	9.43326	9.62285	9.73726	9.22838	9.87894	9.24948	10.0398	9.15483	8.36693	9.71119	9.63264	9.37268	9.37184	9.21414	10.0048	9.85972	9.21951	9.95686	9.8682	9.85025	9.5673	10.1717	9.27648	9.83918	9.55963	9.61836	10.2314	9.52957	9.50422	10.0385	8.91582	9.67718	9.49293	9.93974	9.31384	8.51735	8.68158	9.89213	9.35116	9.80199	9.6147	9.8162	9.50081	9.24509	9.95967	10.2149	8.68763	9.62783
AGMAT	4.82106	5.9848	5.61117	7.01955	5.05639	5.50122	5.92117	13.0808	5.33548	5.74553	4.66061	5.03937	5.99005	6.61583	5.23442	4.63078	4.99865	4.88764	11.5203	4.78335	6.13942	5.2772	4.98761	4.97751	4.67152	7.16916	5.13805	4.39326	5.447	5.16495	12.4954	4.67326	6.79138	5.34972	4.74833	4.74611	5.45208	5.32419	8.52082	11.8788	6.84873	5.53721	5.31688	5.21403	5.04507	6.48485	5.59992	5.68236	5.53925
AGO1	8.16575	8.06324	8.55183	8.38858	8.44178	8.23427	8.63206	7.92628	8.35776	8.14986	8.28684	8.14986	8.32979	8.25355	8.42666	7.7813	7.60813	8.0657	7.67791	8.19197	8.18789	8.27186	7.80119	8.08343	8.17124	8.45588	8.0814	8.09836	8.18789	8.35328	7.50119	7.25903	8.55657	8.26849	8.37846	7.80562	7.67714	7.75433	8.29138	8.12577	8.53813	8.21976	7.13049	8.07714	8.20445	8.08838	8.19501	7.49254	8.29066
AGO3	7.89656	7.583	7.35761	7.27937	7.73871	7.46576	7.62247	6.84075	7.4129	7.77895	7.86595	7.58965	7.46804	7.62413	7.89	7.51755	8.36461	7.91983	6.9542	7.29812	7.15022	7.29102	7.11346	7.09324	7.23736	7.61807	7.37498	7.26711	7.3718	7.83554	6.68749	6.78861	8.25989	7.62407	6.96911	7.18276	6.1464	6.2972	7.18503	6.3706	6.77897	7.29607	6.3635	7.06177	6.44222	7.80464	7.10539	6.24982	6.79926
AGO4	5.18462	6.28562	5.20453	5.35841	5.11876	5.11837	5.03189	5.01538	5.4167	5.39098	5.26647	5.48203	6.06953	6.80224	6.00291	4.92627	5.29	4.9473	5.01683	5.0232	5.00052	5.86301	4.87657	4.74491	5.04235	4.8076	4.80305	5.17279	5.23739	5.46275	5.09197	4.80691	5.32125	5.21375	5.07076	4.9366	4.75338	4.53056	5.3648	5.53343	4.96259	5.22754	5.2214	4.97332	5.17104	5.31888	5.09247	4.98772	5.12613
AGPAT1	8.55145	8.35521	8.32253	9.22647	8.66817	8.56422	8.60256	8.64632	8.44583	8.57921	8.37596	8.35323	8.57503	8.55314	8.45663	8.35806	8.42612	8.40731	8.79015	8.75361	8.50821	8.57242	8.60453	8.7597	8.75549	9.50372	8.7278	8.65667	8.57272	8.608	8.77729	8.77973	8.7283	8.62584	8.64011	8.58614	8.8065	8.9899	8.78085	8.62921	8.64583	8.64738	8.60237	8.71507	9.03523	8.93299	9.16257	8.79038	8.74935
AGPAT2	7.96621	7.8173	7.29311	7.5262	7.92708	7.63432	7.96996	8.0211	7.95982	7.80819	7.44226	7.53038	7.99329	7.99257	7.7914	7.65563	7.97985	7.50994	8.03402	7.59269	7.8248	7.62089	7.76956	7.79562	7.68779	7.65042	8.52272	7.5301	7.7661	7.78965	8.44445	7.80446	7.35773	7.52981	7.59955	7.38088	7.47749	7.7249	7.45134	7.92758	8.06797	7.7496	7.62383	7.7717	7.93152	8.05903	7.92597	7.94198	7.93854
AGPAT3	6.09647	6.07668	5.78744	5.63063	5.68348	5.87335	5.91131	6.53111	5.91249	6.21144	5.62011	5.90105	6.20021	6.23772	6.21702	5.13907	5.97711	5.65046	5.84521	5.75164	5.79262	5.96762	5.59826	5.64573	5.92229	5.92554	6.06666	5.90766	5.59198	6.03672	6.35833	5.9847	5.6106	5.72271	5.65749	5.46619	5.7893	5.83521	5.51607	6.03246	5.9645	5.6253	5.69072	6.44409	5.97096	5.92412	5.90105	5.94306	6.23733
AGPAT4	7.85002	7.11877	7.31727	7.33011	7.04383	7.23072	7.81671	5.95231	7.41011	7.99195	6.76729	7.11918	7.42051	7.78209	7.73393	7.1515	6.81374	6.95205	6.93745	7.24182	7.44621	7.16676	7.16325	7.90392	7.37396	7.03035	7.6141	6.86404	7.13852	7.27668	6.69589	7.34238	7.98029	6.81491	7.43984	6.99462	6.81428	6.67331	7.48509	6.55361	6.68422	6.8449	6.93629	6.61358	6.68962	7.14618	6.60646	6.06831	6.58934
AGPAT5	9.3665	9.35299	10.192	9.44168	10.4516	10.0102	9.96145	9.37936	9.24706	9.04622	9.38938	9.50385	9.1956	9.11407	9.52652	9.88676	10.4425	10.1711	9.63988	9.56969	10.656	9.35472	9.72224	10.4658	9.96124	10.6284	10.2041	10.3631	9.65542	9.86611	9.12536	10.0896	11.061	9.11668	10.142	9.1882	11.1052	10.6476	10.0965	9.22213	10.6445	10.2562	10.1797	10.3223	10.0808	10.045	9.82032	8.15127	9.9907
AGPS	8.59953	8.47099	7.68163	7.78087	7.58549	8.6666	7.8532	7.76688	8.15921	8.14646	7.98541	7.74035	8.83229	8.96069	8.40598	7.11845	7.44708	7.65746	6.71319	7.69889	7.54528	8.30992	7.20004	7.13884	7.97164	7.38267	6.92673	7.89815	7.99434	8.35685	8.08686	8.10895	8.31627	7.40046	7.60892	8.15888	7.35662	7.26795	7.72796	7.28988	6.51874	7.20008	6.88437	7.06351	6.99855	7.35967	7.09097	6.82867	6.22637
AGR2	4.37474	4.38719	4.37559	4.27798	4.98827	5.63804	9.87993	4.86355	5.18079	4.26962	4.06594	4.18054	4.27612	5.03562	4.39917	5.09153	4.36621	4.73883	4.91871	4.27944	4.28998	7.95012	4.18463	4.2499	4.26068	7.9927	4.51531	4.22771	5.74428	4.22432	7.57384	3.9187	5.99457	4.06551	4.25153	4.13892	4.31948	4.13891	4.32075	6.51841	4.32183	4.49709	4.63232	5.22765	9.48849	4.91028	4.69545	4.92706	4.40853
AGRN	7.41006	6.97484	7.55147	7.66322	7.64223	7.6171	8.43473	8.0933	7.36214	6.79587	7.35853	7.33681	7.62023	6.6672	7.12421	8.19046	7.82105	7.10324	8.32188	8.29304	7.91692	8.64621	7.93131	7.10913	7.92501	8.12755	8.1241	8.51276	8.24104	8.45892	8.68364	8.15373	7.95976	7.74806	8.55674	9.04812	8.71615	8.59294	7.88088	8.15882	8.30971	8.3632	7.83383	7.14496	7.36161	8.54283	8.51876	9.02012	7.07657
AGRP	6.04685	5.77761	5.86128	5.86535	5.887	5.65076	5.91842	5.86105	5.75038	6.08594	5.86418	5.92347	5.9131	6.13804	5.80793	6.01964	5.87891	5.86638	5.85066	5.7346	5.60113	5.71241	5.86038	5.86418	5.89631	5.93948	5.99488	5.72621	5.94507	5.91675	6.00417	5.62766	5.87009	5.83924	5.6681	5.71869	5.72063	5.86418	5.72813	5.86418	6.04342	5.96323	5.81722	5.82363	5.78388	5.78472	5.71263	6.08296	5.91256
AGT	7.53386	8.67152	6.57888	6.93602	5.27581	6.41922	5.87178	9.71554	6.47403	5.86292	5.64406	6.20607	5.92877	6.36277	6.32109	5.10804	4.9145	5.22111	7.36265	5.05471	5.51219	7.04382	5.12012	5.17838	5.15506	5.34509	5.08213	5.14715	6.1002	6.0684	9.25876	5.02584	4.95204	5.55774	6.14104	5.53652	4.99097	6.00685	5.83797	7.98503	5.18114	5.56064	5.56916	5.34184	5.38161	6.97497	5.40673	5.78837	5.59698
AGTPBP1	8.34713	9.125	8.39855	8.04441	9.15961	8.67453	9.32939	8.24122	8.83104	8.25888	8.84793	9.01936	8.74216	8.98805	8.70636	8.8594	9.169	8.7876	8.90844	9.0288	9.7388	8.77077	9.39392	9.70085	8.77664	9.39303	9.4079	8.69331	8.79856	8.76373	7.81067	9.16088	9.77515	9.14661	8.80361	8.37228	8.09447	7.99478	9.03262	8.37983	9.5156	8.85307	8.93352	9.52593	8.493	9.28567	9.38859	7.42203	9.17165
AGTR1	6.93683	8.36049	8.9975	7.53168	4.55887	5.95068	4.60918	8.63536	7.46824	6.54367	5.94725	5.65284	6.36321	4.85001	6.789	4.89471	4.329	4.83166	7.17235	7.3294	7.2064	7.34567	5.59651	4.19514	5.65519	4.30179	4.35911	6.05395	7.93772	5.75442	7.44265	5.53678	5.9837	6.37232	6.80186	4.83391	6.3146	4.28153	5.88128	5.82045	4.41471	4.44184	7.06003	5.65818	6.13893	4.73301	5.96855	5.87888	4.53128
AGTR2	4.76694	5.005	5.03437	7.10187	4.7101	4.43767	4.77846	4.89173	5.41306	4.96902	6.06836	5.30256	4.60373	4.94146	5.57662	4.85817	5.18928	5.71491	5.23972	6.47308	6.48616	5.37819	4.97285	4.57765	6.29265	4.6253	4.80465	7.17898	6.53789	5.76672	4.91586	6.38478	4.79465	4.77568	4.60469	4.80687	4.70162	4.60115	4.72593	4.26641	4.75576	4.594	6.97532	4.63556	5.09122	5.21629	4.61316	5.82837	4.64959
AGXT	6.00301	5.92412	5.87215	5.90918	5.77491	5.70084	6.28534	6.31642	5.73637	5.96277	5.6987	5.94734	5.88052	5.70153	5.9126	6.10823	5.85631	5.81643	6.14209	5.66862	5.76661	5.68931	5.93891	5.96372	5.93731	5.87043	5.81512	5.80664	5.66623	5.72486	6.09624	5.65362	6.01794	5.73059	5.76104	5.58797	5.62564	5.69549	5.70229	6.06255	5.87043	5.67096	6.16551	6.02191	5.95912	5.73851	5.94808	6.07976	5.82442
AHCTF1	9.04257	8.23427	8.72714	8.43896	9.41801	8.7237	8.81554	8.13883	8.46792	8.62841	8.21797	8.29065	8.29008	7.96547	8.42447	8.56052	8.59121	9.04664	8.48331	8.5836	8.43267	8.56064	8.508	9.2501	7.99053	9.68984	8.508	8.699	8.35284	8.36393	8.71315	8.87203	8.84279	8.82005	8.41489	8.63005	8.28485	8.40684	8.48493	8.04602	8.26096	8.49457	7.86102	8.83757	8.23491	8.21629	8.36844	8.57625	8.9766
AHCY	8.71963	9.29634	9.9717	9.53953	10.2069	9.83592	10.2867	10.9323	9.49692	9.38288	9.14052	9.52852	9.40511	9.42283	8.99279	10.3924	9.76085	9.96665	10.3684	9.59732	10.1592	9.15978	9.74027	10.0643	9.38376	10.3691	10.439	9.44086	9.46399	9.53174	10.4059	9.71707	10.4953	9.54146	9.6554	8.8584	8.55101	9.88704	9.73213	9.92773	10.4462	9.84818	10.9761	9.14942	9.64158	10.1492	10.0354	8.29075	9.7625
AHCYL1	11.0125	10.8095	10.5563	10.6861	10.6516	10.5176	10.9695	11.413	10.6121	10.6618	10.7831	10.7705	10.893	10.8191	10.9121	10.6488	10.3853	10.5077	10.8917	10.7751	10.8602	10.8109	10.7138	10.6389	10.8878	10.4446	10.6989	10.5522	10.6796	10.9131	11.6763	9.81611	10.9092	10.7232	11.0815	11.4117	10.6037	10.6511	10.9836	11.0671	10.7653	10.9807	10.1665	10.2468	10.2917	11.0673	10.8794	11.0462	10.2704
AHCYL2	7.50977	7.4389	9.5816	7.93065	6.54535	7.48711	7.05301	8.30629	7.2796	6.68561	7.26963	7.55051	7.34948	7.2713	7.16868	6.86198	7.20196	6.83613	7.74974	7.62265	7.45604	7.59691	7.59129	6.88825	8.41692	7.29334	6.52112	7.42103	7.71092	7.3493	8.89728	7.21023	8.30029	7.50921	8.0021	7.5994	8.10283	7.35868	8.05543	7.78503	7.16618	7.60277	7.59145	6.71953	6.75532	7.39614	7.67862	7.31643	6.77456
AHDC1	6.59884	6.33789	7.32598	7.2551	7.359	6.81338	7.24204	6.60922	6.66696	6.34906	7.20895	7.24563	6.4849	6.12612	6.22438	7.24204	7.83406	7.32028	7.41649	8.30325	7.30269	6.63452	8.05327	7.24204	7.9654	7.92209	7.34644	8.09605	7.12343	7.02281	6.59455	6.99612	7.46543	7.62979	7.58996	7.72985	7.5847	7.75017	7.31392	6.9368	8.0779	7.95427	7.45346	6.88709	6.86701	7.21831	7.76096	7.47516	7.26864
AHI1	8.34891	7.69229	8.2207	9.29649	7.84215	8.70779	7.29847	7.03628	8.09477	7.90073	8.32914	8.38408	7.23113	7.48808	8.28693	6.29775	8.23752	8.0353	8.02969	8.2757	8.80616	8.54319	8.4209	9.24821	9.10085	7.85726	8.39809	8.17164	8.03077	7.82465	7.66453	7.24138	8.76787	7.99692	8.3726	9.04292	7.74467	7.80947	8.18747	7.90954	8.2588	8.43796	8.72323	8.72053	7.00067	8.68911	7.6309	7.3446	8.68604
AHNAK	11.0184	10.9159	10.5946	10.2322	8.58832	10.0688	8.40495	10.0787	10.8868	10.4267	10.9741	9.78626	11.0515	11.1067	10.5025	9.54384	8.57731	8.83741	10.5077	9.55968	8.91764	11.1995	8.94696	8.00458	9.86098	8.79141	8.92005	9.42863	10.7134	10.4521	10.5532	9.2567	7.58893	9.88649	11.0473	11.8701	11.7321	10.4635	10.7455	10.9832	7.94945	9.11071	8.89342	8.10758	8.95862	9.88547	9.25925	11.2275	9.44657
AHNAK2	7.36012	5.34013	4.70867	5.15546	4.45566	7.41069	4.87963	5.2434	6.84527	4.89511	4.84525	4.97051	6.59412	5.04987	4.87932	4.21692	4.8631	4.73199	4.55816	4.8502	4.81804	6.4437	4.61065	4.53484	4.55998	4.64505	4.72119	4.99521	5.1194	5.20932	4.72849	4.61325	4.42365	4.26046	5.14933	5.00125	4.70841	5.6894	4.98941	5.9614	4.97106	4.79466	4.95419	4.39762	5.66255	6.53092	5.00369	5.32603	4.59862
AHR	10.1675	10.7537	9.41324	9.42284	7.05781	10.0795	5.78965	8.75622	11.0239	9.97131	9.54563	9.03918	11.1112	10.9866	10.8114	6.50449	5.80635	6.0268	7.6272	7.9421	7.2795	11.3999	6.4174	5.61438	8.70365	7.87217	6.04661	7.61671	10.6686	11.1388	9.20939	6.71062	5.98559	9.28578	9.79364	9.50354	9.51701	9.58652	10.2368	10.5469	5.46142	6.35938	6.34528	6.36109	7.31307	7.42867	6.32062	9.52521	7.67606
AHSA1	10.1767	10.0378	10.3489	10.208	10.2031	10.2198	10.3247	9.94536	9.87976	10.7157	10.2946	10.3733	9.98122	10.0182	10.277	9.7858	10.6378	10.4292	9.77023	9.74729	10.4175	9.25613	9.51199	9.38078	9.71909	10.2842	10.0404	9.49683	9.66968	9.33744	10.2446	10.2591	10.25	10.0846	9.14606	9.31742	9.53793	9.36362	9.58579	9.51426	10.0065	10.6183	10.3675	9.8897	9.99678	10.238	10.5353	10.0958	10.1207
AHSG	5.69427	5.73121	5.35529	5.42405	5.46895	5.44095	5.80296	5.9654	5.70562	5.64743	5.59052	5.49684	5.58648	5.64892	5.6309	5.89965	5.35609	5.75811	5.918	5.57684	5.49101	5.29637	5.43165	5.47274	5.53329	5.73075	5.62471	5.55694	5.36472	5.49251	6.22919	5.64566	5.70045	5.45214	5.47226	5.29981	5.52999	5.4743	5.2083	5.53759	5.74201	5.41225	5.43609	5.34111	5.86087	5.54092	5.53506	5.63053	5.75133
AHSP	6.52824	6.87506	6.08603	6.07245	6.26541	6.02799	6.26541	6.70063	6.67455	6.74752	6.30391	6.45818	6.22183	6.48909	6.3934	6.34063	6.10369	6.22615	6.55292	6.42865	6.00581	5.98197	6.70601	6.29921	6.23239	6.24648	6.20235	5.99006	5.95423	6.65771	6.5439	6.22613	6.02564	6.09033	5.86263	5.89185	6.0294	6.40419	5.96297	5.8617	6.25941	6.2038	6.07754	6.19598	6.42462	6.05325	6.17858	6.32979	6.50341
AICDA	3.92582	3.8056	3.74324	3.68648	3.88209	4.02009	3.75666	3.57563	3.80476	3.99235	3.55195	3.66009	3.89791	3.99993	3.90453	3.76315	3.70285	3.65965	3.53161	3.76123	3.57554	3.69607	3.61312	3.66755	3.55451	3.67681	3.67627	3.50005	3.46594	3.64976	3.56805	3.59182	3.73353	3.65171	3.63403	3.50958	3.6168	3.56571	3.57926	3.75445	3.7963	3.72978	3.81512	3.73845	3.81875	3.70586	3.76836	4.37643	3.83552
AIDA	9.9605	9.52102	10.2508	9.47509	9.82415	10.4129	9.4618	9.12849	9.9613	9.47885	9.54621	9.54205	9.73262	9.73755	9.70926	9.25055	9.29281	9.79696	8.89094	9.1537	9.44426	9.58501	8.87334	9.53441	9.10848	8.24404	9.09063	9.18618	9.74363	9.56218	8.74401	10.0166	9.23742	9.20387	9.18708	9.86545	8.25493	9.78236	9.40402	9.08033	7.75741	8.77931	8.84591	9.537	8.44084	9.25805	8.76338	8.65361	9.36345
AIF1	11.6059	12.2241	10.0029	9.64018	9.0474	11.4651	8.14724	10.748	12.032	12.0313	10.6905	10.8838	12.0845	12.3258	12.0569	9.60153	8.1489	8.76307	9.16705	9.67281	8.77169	11.2177	9.06731	9.51214	10.4519	9.48659	8.56466	9.31264	10.8742	11.6554	9.86994	8.66011	8.60453	10.6579	9.87262	10.4216	10.618	10.2965	11.0988	11.4549	8.18551	7.72897	8.5591	8.42571	8.4868	9.56046	8.1523	10.6533	10.158
AIFM1	7.77801	8.3762	7.6586	8.09191	8.26949	8.06782	9.03864	10.8069	7.96671	8.04104	8.05268	8.07239	8.16565	8.29084	8.26373	8.73549	8.58757	8.26477	8.49049	7.97322	8.07739	7.76819	7.8845	8.11254	7.97241	7.58084	8.3632	8.10367	7.84105	7.50941	10.0646	7.80178	9.09221	7.61724	8.12434	8.51126	8.86281	7.67147	8.31547	8.80303	8.02371	8.0435	7.61502	7.95806	7.22329	8.39957	8.0576	8.64145	7.53781
AIM2	7.63413	7.71995	5.7795	5.20034	5.44729	7.22356	5.29605	5.99199	6.5889	7.24666	5.52421	5.82708	7.27879	8.20717	8.09855	5.3409	5.27699	5.33601	5.33336	5.67827	5.35941	6.69134	5.338	5.5028	5.4946	5.63927	5.0694	5.38934	5.42999	7.39522	5.25102	5.25748	5.03719	7.24897	5.17949	5.91709	5.65689	5.65622	5.98358	6.12151	6.16684	5.15057	5.36499	5.36896	5.53431	6.27843	5.62838	7.1103	5.68548
AIMP1	9.72911	9.69681	9.73941	9.73544	9.94026	9.8545	9.57989	9.88691	9.8664	9.98939	9.76373	9.29675	9.50348	9.58757	9.7989	10.101	10.2138	9.51433	9.49873	9.43033	9.56799	9.94255	9.24394	9.52689	9.34294	8.81115	9.97742	9.26143	9.60237	9.62959	9.79063	9.58163	10.0618	9.25802	9.27363	9.84101	9.64533	9.04993	9.33173	9.50391	8.77091	9.72253	9.72067	9.35157	9.58936	9.79819	9.063	9.66455	9.52376
AIMP2	9.19428	8.90943	9.36596	8.72814	9.58417	9.75767	10.6561	9.51586	8.98367	9.09929	8.77317	8.94742	9.00693	8.90042	9.00807	9.86349	9.25298	9.31561	9.05702	9.08357	9.49229	8.92935	9.19479	9.37361	9.11198	9.73237	9.29371	9.49962	9.04574	9.24964	9.52958	9.96301	10.3622	8.56177	9.24088	9.5622	9.89612	9.6192	9.20458	8.72493	9.59532	8.811	9.45561	9.31193	9.8782	8.79342	9.11325	9.16639	8.66916
AIP	8.70176	8.87897	9.30712	8.69312	9.15807	8.69038	8.72703	8.98236	8.88337	8.80973	8.5143	8.5387	8.85401	9.03949	8.57858	9.22841	9.19774	8.8705	9.29485	8.86771	8.06407	9.04646	8.51493	8.83553	8.52611	8.92967	9.59339	8.99953	9.15354	8.69151	8.70573	8.92603	9.21716	8.73699	8.71574	8.88266	9.07371	8.94501	8.84474	8.98629	8.84173	8.88266	9.78413	8.54883	8.95677	9.13618	8.90336	9.09456	9.0594
AIPL1	5.23678	5.00823	4.87925	4.99381	4.9296	4.73383	5.20278	4.99415	4.97578	5.23754	4.93445	4.92252	4.81219	5.03126	4.8953	5.00154	5.09122	4.88384	5.03795	5.08787	4.5736	4.74857	5.20257	5.05433	4.94968	5.00823	5.16324	4.87043	5.00769	4.92532	4.9305	4.85222	4.8885	4.91017	4.82373	4.65833	4.86686	4.73382	4.77597	4.85229	5.66902	4.76942	5.27208	5.18992	5.53016	4.77396	5.15722	5.2275	5.27851
AIRE	6.66829	6.39638	6.51658	6.30927	6.57862	6.33381	6.64151	6.42572	6.58112	6.64239	6.38515	6.24982	6.65029	6.57092	6.38202	6.42406	6.47724	6.47528	6.54186	6.50698	6.42652	6.40697	6.53144	6.51883	6.6048	6.57041	6.81118	6.28053	6.58468	6.75238	6.31486	6.36504	6.36568	6.43647	6.42434	6.23677	6.36425	6.51139	6.2529	6.35935	6.74505	6.6076	6.82171	6.50444	6.61665	6.54391	6.48146	6.90804	6.80157
AJAP1	5.69918	5.63877	6.15207	5.77788	7.34039	5.75358	6.85632	6.80686	5.88868	5.69103	5.66049	6.36262	6.14437	5.69741	5.56139	7.11106	5.95327	6.15899	6.58085	7.37278	6.22403	7.15592	6.24835	8.56373	5.6944	6.41417	6.86386	5.64119	5.95782	7.04411	6.49085	6.16418	6.98592	7.18113	6.64717	9.43153	10.3703	7.9166	5.8821	6.46488	6.66909	5.78245	6.26631	7.30249	6.12505	5.67134	7.81134	9.24672	6.02292
AK1	8.36559	8.43218	7.5884	7.97108	7.99502	7.87313	8.08546	7.71204	7.77382	7.11383	7.71016	7.53778	7.6809	6.89887	7.32233	7.51478	8.2082	7.63115	7.93568	8.24589	8.14333	7.63062	7.94263	7.7274	7.53432	8.11443	7.37655	8.14256	7.48241	8.05168	7.88349	8.34071	7.85098	7.26841	7.63324	7.8842	7.73248	8.19274	7.45547	7.4997	8.10998	7.9641	7.52248	7.64666	7.43872	8.77907	8.08645	7.5926	7.38055
AK2	8.68219	8.57509	9.27017	8.5718	10.054	8.8967	9.99406	10.1377	8.55327	8.30622	8.99771	9.26529	8.55894	8.58124	8.37144	9.75678	8.9242	9.45188	9.91855	9.5273	9.89995	9.00986	9.73114	10.153	9.40914	9.60779	10.5401	9.4427	9.22504	8.99539	9.93278	9.05818	10.4858	9.37528	9.67559	9.43398	9.16053	9.14676	9.57728	9.42852	9.53264	9.816	10.0865	9.78232	9.64736	9.74397	9.72307	9.49952	8.99579
AK4	9.53622	7.91931	7.2424	6.77945	8.37872	7.39008	8.47163	12.5772	8.01531	8.46763	6.65174	7.08691	8.54136	7.94044	6.7892	6.51231	8.08748	6.63742	10.7346	6.82	8.30959	7.31033	6.91381	9.35432	6.79185	8.55665	9.53941	6.46254	7.13454	8.66381	11.416	7.33056	9.45894	6.48397	7.5247	9.30327	8.42465	7.69046	8.26523	10.5721	6.85381	7.79709	7.97689	8.27361	9.16582	8.66488	7.72053	8.03431	7.58016
AK5	5.83897	5.42123	5.63137	5.76469	5.38219	5.3824	5.40647	5.64901	5.57123	5.50792	5.46657	5.27878	5.82174	5.45355	5.29429	5.35622	4.94928	5.42506	5.10801	5.11972	5.50268	5.58714	5.14637	5.29721	5.27099	5.19091	5.67469	5.25531	5.19153	5.18052	5.78049	5.22843	5.45895	5.00617	5.15031	5.40742	5.15615	5.34909	5.07266	6.09885	6.43365	5.99754	6.69702	6.5474	6.59071	6.28445	5.50029	5.80585	6.33841
AK6	9.53061	9.18793	9.30745	9.09865	9.41154	9.10785	9.50496	9.41787	9.47111	9.58852	9.25987	9.27987	9.22107	9.14336	9.67772	9.75869	9.11781	9.27983	9.72614	9.15276	9.58824	9.23347	9.23637	9.33625	9.44133	8.3915	9.18785	9.03711	9.15381	9.2327	9.61105	9.34972	9.19125	9.46636	9.34294	9.26626	9.08961	9.26357	9.32177	9.31012	8.98385	9.32427	9.60544	9.44201	9.17875	9.30403	9.0445	9.0591	9.2087
AKAP1	7.87918	8.32345	8.66028	8.79304	9.20317	8.49394	9.41293	9.84709	8.90794	7.76088	8.74942	8.75648	8.51083	8.62533	8.23899	9.42799	9.42185	8.59086	9.97815	8.97896	9.35839	9.42074	9.30522	9.19519	8.41189	9.44932	9.70957	8.71331	9.52355	8.37575	9.96464	8.87827	9.46961	8.7558	9.25711	8.84247	10.0422	8.92196	9.53503	9.36037	9.78321	8.97879	8.67498	8.54258	8.03485	8.36653	9.0695	8.55314	8.38524
AKAP10	8.03808	8.40805	8.12832	8.3823	8.16056	8.17973	7.30081	7.84963	8.43672	8.62341	8.42621	8.50721	7.91471	8.95242	8.14926	8.18698	8.67499	7.80209	7.94352	8.92385	7.15139	8.24184	8.97216	8.05	8.14447	6.91289	8.63841	8.32313	8.41887	8.65739	7.94353	8.23446	7.75223	8.36561	7.6359	8.62267	8.83555	7.53986	7.88029	7.771	8.11703	8.29285	8.10023	8.39855	8.30556	7.67826	8.1298	7.88592	7.8293
AKAP11	9.56849	10.1098	10.5951	10.285	9.43503	10.6659	10.1112	9.92361	10.024	9.60022	10.1664	10.0408	10.024	10.091	10.1082	9.7432	10.6206	9.88768	10.0332	9.90616	9.95998	10.3726	9.8314	10.2834	10.1641	9.7677	9.81613	9.96975	10.2301	9.99731	9.86936	9.5821	10.0825	10.0387	10.3147	10.345	10.5873	10.9317	10.2302	10.0914	9.31898	10.1061	9.11887	9.73426	9.90031	10.4674	9.74096	9.82472	9.36901
AKAP12	12.2221	10.7153	12.2817	12.3245	11.5981	12.3317	12.2989	10.3355	12.033	11.5116	11.4764	11.6715	10.0034	9.63586	12.6676	10.7538	10.0164	11.8061	10.56	11.0742	12.0438	11.8349	10.6289	11.7319	11.6475	12.1912	11.4816	11.4714	11.6514	11.9083	10.7132	11.9744	11.0072	10.9399	11.7723	12.9151	12.1611	11.4209	10.7813	10.2703	9.81088	10.5703	9.17302	10.3627	11.7292	12.4011	9.43847	11.7307	11.9641
AKAP13	10.7068	9.52859	9.58422	9.29025	9.32596	9.16767	9.71149	9.00801	9.75461	10.0092	9.57261	9.63026	10.0192	9.66446	10.3438	8.72347	9.82299	9.13102	8.52277	9.74205	9.64696	9.72142	9.95533	9.04279	10.5208	9.56589	9.48597	9.75664	9.48969	9.79887	8.74498	8.79906	8.28855	9.35249	10.6284	10.4345	10.6734	9.77019	10.3164	8.99476	8.98934	9.70065	8.62773	8.62372	7.97703	9.31654	9.38304	8.61889	9.03424
AKAP17A	9.24955	9.81925	9.88195	10.2296	9.82996	9.65471	10.1115	8.97985	9.78991	9.84165	9.98706	10.0846	8.81029	9.11075	9.86354	9.48066	10.5832	9.70444	10.0051	10.7154	10.2165	9.87754	10.7106	10.4405	10.2278	10.4425	10.2581	10.5586	10.2169	9.81784	9.62437	10.2545	9.86293	9.93296	9.82673	9.88734	10.024	9.97548	10.5236	9.48201	9.99092	10.1743	9.46049	9.94436	8.89629	9.6591	10.2853	9.61613	10.216
AKAP3	4.84241	4.87736	5.04501	4.99939	4.99264	4.82656	4.86817	5.22984	4.85775	4.93614	4.5736	4.72194	4.80324	4.76651	4.94263	5.37615	5.38489	4.94594	5.28467	4.84475	5.70442	4.83266	5.03346	5.15887	5.17388	4.93245	5.11805	5.04037	4.86955	4.55365	5.40541	5.1231	4.95823	4.80868	4.83186	4.827	4.68821	4.70417	4.91779	5.34784	5.30073	5.05707	5.5188	4.98251	5.23442	5.12409	4.97603	5.06251	5.0616
AKAP4	6.03234	6.13333	5.87604	5.84967	5.86098	6.04331	6.0017	6.1532	5.99646	6.16982	5.90903	5.79448	5.96832	5.91771	5.96372	6.00934	6.00218	6.00897	5.99653	5.96782	5.89233	5.80781	6.07867	5.97955	5.96372	5.99845	6.09861	5.96372	5.95309	5.93083	6.26815	5.94241	6.02187	5.7392	5.91747	5.78071	5.85333	5.99176	5.78786	5.75953	6.14641	5.90059	5.96372	5.74912	5.96372	5.95017	6.09912	6.29478	5.86471
AKAP5	4.77696	4.70281	4.65259	5.77928	4.77197	4.50424	4.75728	4.84742	4.8026	4.86402	4.56257	4.76327	4.74411	4.73168	4.65259	4.48447	4.57189	4.54491	4.78369	4.44001	4.44948	5.09689	4.53916	4.82937	4.46703	4.58863	4.85782	4.5631	4.68751	4.67363	4.6774	4.49894	4.54857	4.64318	4.42012	4.43295	4.40157	4.45841	4.45228	4.65259	5.12708	4.72938	4.70185	4.74399	4.8081	4.96604	4.68541	4.93333	5.15591
AKAP6	4.85731	4.966	4.60756	4.68789	4.94528	4.68376	5.10192	4.86524	4.69409	5.0318	4.77298	4.63105	5.0468	4.85615	5.00772	4.85516	4.69362	5.24636	4.84621	4.73289	4.72029	4.56997	4.55883	4.8822	4.78659	4.81637	5.06443	4.77625	4.61177	4.839	4.7748	4.78659	4.78659	4.55175	4.68443	4.71419	4.72905	4.65284	4.35483	4.41608	4.69451	4.51691	4.53569	4.73103	4.86602	4.55325	4.85057	4.75378	4.70797
AKAP7	7.45902	8.39973	8.23004	8.60291	7.42119	8.04427	7.84614	8.3405	8.08635	6.75155	7.84468	7.83804	8.48231	8.73098	8.59967	8.04772	7.15622	7.18298	8.25918	8.4453	9.10425	8.50608	7.72319	7.52397	8.14843	7.66281	6.72321	8.64318	8.35696	7.9335	7.71919	8.14929	8.13039	8.02223	8.06634	8.39786	8.80881	7.75086	8.48127	8.27203	7.88875	8.25348	8.01167	7.30031	8.06335	7.81606	7.78785	8.04711	6.54429
AKAP8	8.18933	8.50278	8.86377	8.65382	8.78332	8.38486	8.68324	8.48442	8.41722	8.09643	8.61803	8.66427	8.12489	8.30829	8.29359	8.39741	8.78646	8.76719	8.92988	8.78996	8.52915	8.68579	8.87377	8.69542	8.64858	8.615	8.74097	8.97461	8.83452	8.52891	8.23346	8.56873	8.31581	8.61955	8.94557	8.86914	9.04179	9.32894	8.71544	8.47489	9.24638	8.76269	8.56864	8.36721	7.87917	8.51663	8.48122	8.38208	8.1258
AKAP8L	7.32968	7.1792	7.59187	8.03294	8.01003	7.30752	8.61223	6.5326	7.10084	7.40702	7.62015	8.10326	6.76789	6.90993	7.22281	7.8398	8.75728	7.96723	8.01932	8.66181	8.27086	7.45166	8.78467	8.2764	8.30064	8.32727	8.29161	8.50867	7.79854	7.16436	7.45401	8.72094	8.23742	7.99035	7.87189	7.50116	8.3886	8.4542	8.09715	7.44883	9.06413	8.56466	8.04429	7.44179	6.55944	8.21317	7.98136	7.2797	8.03945
AKAP9	8.8976	9.01771	9.48045	9.47205	9.66991	9.65763	9.29739	9.72245	9.34952	8.74885	9.59813	9.61024	9.36502	9.51562	9.40388	10.0189	9.87122	9.77498	9.98864	9.46258	9.71634	9.54122	9.71297	9.19521	9.31118	8.75515	8.38469	9.39033	9.34562	9.08475	10.1412	9.45958	9.84899	10.0286	9.74614	9.75692	9.68632	9.36584	9.48004	9.40267	8.94104	9.26507	8.89968	10.0463	8.62241	9.69921	9.32093	9.17935	9.5949
AKIP1	8.48327	8.75518	8.35298	8.34404	7.91492	8.75792	8.37803	8.16297	8.69371	8.82714	8.54791	8.24911	8.6827	8.75802	8.50391	8.29503	8.35344	8.07601	7.95796	8.36492	8.26822	8.34783	8.0626	7.49098	8.15755	7.40383	8.05888	8.49971	8.40439	8.56363	7.97806	7.9796	7.89793	7.89202	8.2569	8.68676	8.70854	8.00139	8.28548	7.99667	7.7979	7.95227	8.64823	7.81144	6.79633	8.17879	7.72349	8.04804	8.00403
AKIRIN1	9.78778	9.04427	8.63392	8.91783	9.77731	8.71497	10.0261	8.60933	8.89836	9.37547	9.3319	9.51252	9.2197	9.15492	9.86979	9.45534	9.45369	9.5197	9.49552	9.60276	9.48058	8.92379	9.45054	9.5844	9.28901	9.43742	9.44703	9.90152	8.90295	9.35177	9.96464	9.00531	10.1285	9.90175	9.35851	8.92573	8.27509	8.62674	9.04384	7.99242	9.91999	8.92991	8.93607	8.65336	7.48958	9.14658	9.39609	9.152	8.94097
AKIRIN2	5.84242	5.64015	5.64715	5.89654	5.81632	5.43056	5.83798	5.57584	5.01625	5.54635	5.56442	5.40013	5.50695	5.42673	6.08795	5.47119	5.88195	6.16263	5.54887	5.54948	6.20328	5.62409	5.62837	6.1001	5.71419	6.4738	5.67408	5.5693	5.30428	5.60542	5.17962	6.35739	6.19586	5.60189	5.35772	5.53404	5.94918	5.54635	5.50267	5.43025	5.97592	5.70853	5.94108	6.22074	5.86671	5.62256	5.90677	6.30449	5.71679
AKR1A1	10.3808	10.8845	10.469	10.3641	10.4543	10.4573	9.9527	12.2021	10.8939	10.5782	10.4503	10.7918	11.1544	11.4158	10.9428	10.6887	10.0529	10.2944	11.1686	10.8639	10.5078	10.6897	10.7024	10.2199	10.5751	10.4294	11.2346	9.88482	10.7368	10.6672	11.6746	9.54739	10.1123	10.5756	10.458	10.3197	9.48829	10.4463	10.7507	11.3274	10.8583	10.286	11.0167	10.5017	10.3822	10.7486	10.6945	10.164	10.1955
AKR1B1	10.6103	11.8215	11.0337	10.3984	10.46	11.0543	10.2658	9.92054	11.056	10.6972	10.8701	11.3119	11.9429	12.6452	11.6166	10.1703	10.1656	10.5595	10.3992	10.5722	10.4719	11.5533	10.3072	10.422	11.1032	10.5272	9.79892	10.2496	11.1458	10.9682	11.6072	10.8301	11.6495	10.9183	10.7219	11.1681	10.3265	10.7447	11.4475	11.5957	10.8828	10.2603	10.7614	10.2337	10.4152	10.5679	10.4499	10.4261	10.7938
AKR1B10	4.77793	4.80922	4.38881	4.19977	4.31859	5.77889	4.58378	4.3757	4.29241	4.63633	4.36514	6.26331	4.53938	4.29126	4.57545	5.03569	4.17697	4.43281	4.33835	4.42403	4.53695	4.27176	4.6166	4.37377	5.03623	4.70787	4.54752	4.50097	4.33324	4.35686	4.48043	4.48227	4.49699	4.75511	4.33159	4.73908	4.37437	4.31547	4.21823	4.57163	4.97106	4.67791	4.64538	4.49243	5.11616	4.62833	4.29054	5.04945	4.54014
AKR1C1	9.51807	9.09002	8.6132	9.1713	7.65469	11.2712	8.13325	9.9675	10.0601	9.28318	9.07865	9.08015	7.77643	8.03841	8.01398	9.82371	7.42073	8.41106	10.0661	10.6772	8.48305	9.24323	9.79999	7.52326	9.09002	8.89221	7.80598	10.4167	9.69587	8.4418	10.7423	8.74497	8.49106	10.0252	9.42817	9.89397	10.4584	8.52757	8.53671	9.1546	8.44313	8.95502	9.37128	8.54182	9.98935	8.87914	9.39051	9.17683	7.21095
AKR1C2	8.90317	8.52859	8.2633	9.01824	7.45795	11.2002	7.8977	9.36683	9.64661	8.69888	8.90575	8.60165	7.10035	7.40477	7.84528	9.40242	7.05599	7.82749	9.70901	10.2323	8.06332	8.70518	9.61531	6.67379	8.69565	8.55938	7.6291	9.99745	9.36838	7.94316	10.0393	8.37153	8.14197	9.64632	9.15567	9.58167	10.049	8.24094	8.0919	8.69196	7.83238	8.46295	8.98834	8.24401	9.76135	8.43969	9.11771	8.65693	6.8757
AKR1C3	9.04432	9.22456	8.93622	9.93204	6.41633	10.344	8.12248	11.589	9.73233	8.71356	8.35176	8.99445	8.76538	8.08241	8.82525	12.0049	6.24238	6.8183	10.8843	9.98952	8.89055	9.37615	9.17538	6.23709	9.41447	8.68558	6.69735	10.5271	9.43966	9.53349	11.1294	8.53906	7.68645	7.34632	9.5552	9.78923	11.5091	9.2312	8.96621	10.5811	4.19997	9.60858	9.24923	6.37519	8.91894	9.13696	9.22801	10.0727	6.85021
AKR1C4	3.70159	3.40397	3.33726	3.54129	3.41037	3.62111	3.41869	3.7894	3.45926	3.50087	3.33067	3.55243	3.6335	3.41027	3.54118	3.63697	3.48603	3.43329	3.6311	3.50572	3.438	3.5882	3.60838	3.28332	3.48475	3.37253	3.58306	3.51304	3.54493	3.51213	3.77903	3.32324	3.52174	3.52356	3.5497	3.61071	3.6729	3.4756	3.55723	3.70508	3.62111	3.5439	3.65825	3.52441	3.61375	3.62331	3.51662	3.50989	3.5739
AKR1D1	3.51827	3.48669	3.38791	3.44249	3.52448	3.38732	3.45758	3.30858	3.46805	3.825	3.322	3.41211	3.37229	3.51536	3.48301	3.39279	3.47586	3.33137	3.40851	3.38642	3.43389	3.53233	3.33086	3.3197	3.28361	3.34554	3.47028	3.43533	3.45	3.29026	3.42396	3.42113	3.36339	3.38192	3.31459	3.39134	3.3578	3.27323	3.42883	3.42161	3.48679	3.57463	3.60807	3.50247	3.69608	3.47953	3.35803	3.80856	4.11018
AKR7A2	9.33962	9.5007	10.1343	9.83823	9.88684	9.42963	9.51158	10.8796	9.4167	9.45283	9.81459	9.71409	9.54352	9.53624	9.29337	10.3544	10.3194	9.85977	10.7151	10.252	9.71079	9.67046	10.0331	9.70877	9.82829	9.76363	10.449	9.94233	9.81986	9.70809	10.6577	9.49414	9.97705	9.77406	10.1157	10.0803	9.30337	10.0106	10.0339	9.44051	9.9533	10.0479	10.6423	9.43921	9.78065	9.81269	9.90982	9.83068	9.37419
AKR7A3	6.77738	7.12813	7.61661	7.12684	7.12582	6.96873	6.97706	10.0533	7.14331	6.92543	7.17112	7.03212	7.33131	7.19714	6.92922	7.8909	7.45721	7.19693	8.82608	7.60974	7.27433	7.30487	7.51484	7.29109	7.33163	7.17518	7.5821	7.44428	7.26921	7.26647	9.73146	7.01035	7.54858	7.11226	7.47801	7.45421	6.98138	7.43538	7.61678	8.78049	7.70973	7.62441	8.01124	7.30753	7.37803	7.48566	7.60997	7.36596	7.29939
AKT1	7.77629	7.66325	7.41848	7.69022	7.61256	7.48839	7.4225	7.06802	7.52033	7.46927	7.26147	7.34489	7.7862	7.67647	7.62431	7.1264	7.74154	7.37288	7.40704	7.55937	7.66697	7.14923	7.43975	7.01584	7.02929	7.87481	7.62006	7.67435	7.25498	7.52167	7.31695	7.87522	7.59361	7.27669	7.48857	7.35341	7.63983	6.83578	7.76095	7.47644	7.80353	7.63596	7.33904	7.43278	7.37005	7.90088	8.096	7.544	7.12721
AKT2	5.58556	5.38596	5.56719	5.5007	5.67756	5.46043	5.71919	5.70449	5.624	5.69499	5.51824	5.46948	5.46185	5.64276	5.70715	5.8434	5.56656	5.62427	5.80742	5.6945	5.70223	5.71092	5.71543	5.82718	5.76762	6.53129	6.06606	5.58951	5.71698	5.54074	5.74265	5.86573	5.65107	5.81231	5.55211	5.75212	5.87821	6.02475	5.60752	5.47013	5.62627	5.6253	5.47498	5.65718	5.54336	5.47544	5.7544	6.22873	5.85333
AKT3	9.45823	9.06361	8.02626	7.76065	7.44896	8.7262	6.32056	8.92514	9.58902	7.7692	9.05533	8.15032	8.88346	8.66839	8.03557	7.07964	6.44539	7.67716	8.6188	8.36774	7.69025	9.89291	7.77444	6.86541	7.97292	9.6615	8.18653	7.58248	9.68217	9.44779	9.72286	7.29968	9.39857	10.4882	8.99722	9.49663	9.17388	9.57618	8.44179	9.10925	9.14439	6.78578	6.77333	6.86563	7.45725	8.57233	7.45101	9.09199	7.47233
AKTIP	8.6085	8.51095	9.53001	9.01335	7.75254	8.42607	8.56341	9.1503	8.7127	7.62484	8.82578	8.50973	8.46152	8.29993	8.42576	8.93452	8.58047	7.44818	8.87728	8.65874	8.3512	9.0911	8.34163	6.979	8.75303	8.57912	7.38419	9.38742	9.16582	8.58661	9.32748	8.39084	7.82365	8.42396	9.15736	9.09978	8.60274	9.23319	8.77724	8.87236	8.33297	8.54175	8.70886	8.07548	8.34346	8.77513	8.15005	8.7419	7.1394
ALAD	8.09007	8.1877	8.18225	7.96855	7.17415	8.47224	7.21344	10.2468	8.48526	7.6062	7.57632	7.73195	8.26007	8.33786	7.90305	7.37172	7.41078	7.15428	9.05392	7.73274	8.34983	8.60908	7.54942	7.17751	7.71991	7.66548	7.57054	7.46868	8.20758	8.28819	9.5545	7.98317	7.25941	7.55699	7.81939	8.61403	8.1491	7.97287	8.37984	9.3624	7.07767	7.80353	7.65435	6.79104	6.59837	8.49505	7.85319	7.40585	7.02622
ALAS1	8.1164	8.68612	8.51395	8.49223	8.88075	7.60133	8.60605	8.75262	8.3048	8.59982	8.37991	8.58209	8.95616	9.48035	8.34968	8.19971	8.87206	8.43755	8.83302	8.77318	8.61237	8.79656	8.26717	8.96316	8.24625	8.93025	8.41453	8.79991	9.04433	8.68896	9.79261	8.64961	8.86158	8.59239	8.2779	8.53561	8.66746	8.34147	9.48208	8.7147	8.55805	8.43636	8.29788	8.14732	8.10391	8.12387	8.2219	7.8331	7.71936
ALAS2	6.16431	6.7023	6.29627	5.72423	5.73244	5.87262	6.11575	6.19816	6.14933	6.49855	6.21025	6.7164	6.21182	6.32647	5.76445	6.05537	5.90543	5.90642	6.66931	6.65734	5.81023	5.55665	7.73287	6.13259	5.88591	5.88066	6.25537	5.74391	5.86371	6.44984	7.10461	5.85882	5.94197	6.03111	5.61465	5.97654	5.5987	5.71429	5.5641	6.1522	5.92244	5.97101	6.04228	5.89037	6.43128	5.808	5.61181	6.07976	6.32709
ALB	4.2832	4.19035	4.14251	4.18078	4.19528	4.29932	4.39035	4.31761	4.30422	4.3028	4.13325	4.20749	4.17684	4.2785	4.62018	4.30422	4.50496	4.27992	4.35803	4.30381	4.20811	4.1787	4.30224	4.33051	4.17425	4.3408	4.48625	4.26409	4.16071	4.29097	4.42986	4.23124	4.26414	4.22688	4.27257	4.14414	4.11161	4.32873	4.15699	4.42528	4.64895	4.38147	4.4958	4.79032	4.71841	4.51752	4.36849	4.67425	4.59117
ALCAM	10.935	9.81313	9.401	11.7807	9.83082	8.92277	5.93961	10.4257	9.90752	11.5805	9.88315	8.71879	10.7886	9.69813	10.586	8.27335	8.25651	9.1184	9.22636	9.02905	9.47002	10.403	7.56578	9.77958	8.70985	8.06343	11.1352	8.67314	10.3971	10.5836	9.72762	5.80364	4.30304	7.98659	9.76399	8.77657	9.46395	10.2708	9.80648	10.2952	4.92129	9.4092	6.03703	7.83744	10.7605	10.4618	6.72053	9.29256	10.3509
ALDH18A1	9.273	8.76967	9.0303	8.87451	9.35919	9.73732	9.57399	8.36448	8.71592	8.64093	8.85013	8.93135	9.08068	8.24913	8.81475	8.99208	9.39293	8.90099	8.54115	8.66204	9.32209	8.66011	8.79362	8.90932	8.32814	8.79486	9.51522	8.90406	8.46678	9.08467	8.61327	9.35849	10.3817	8.64087	8.91318	8.9679	8.50736	8.91595	8.72851	8.47706	9.21305	9.06301	9.02723	8.93809	9.16851	9.83568	9.21283	8.66734	8.34707
ALDH1A1	10.1834	11.2954	10.8577	11.3954	7.20999	9.78853	5.07068	11.7625	10.9766	9.73462	11.3385	10.5929	11.2485	12.1087	11.0222	5.39428	4.48542	7.17307	10.1452	9.62698	8.82138	11.8988	6.86237	4.81238	10.5537	7.15682	8.36843	8.78603	11.6493	10.6084	11.9598	8.57115	6.96652	9.6835	9.9035	11.765	10.5578	10.6939	11.276	11.0771	4.86614	5.86318	6.52096	6.35749	5.826	9.11371	5.23373	11.1204	6.68125
ALDH1A2	6.68561	6.49617	7.10722	8.18894	6.70573	6.4403	5.84188	7.10722	6.50992	7.38328	7.70386	7.4105	6.60871	6.80701	8.09433	6.60698	6.47724	6.69637	6.69465	7.68151	7.22748	6.72069	7.35805	8.07127	7.7185	6.76334	7.48264	7.66915	7.12309	7.40863	6.96648	7.77078	7.52214	7.41893	7.25938	6.72362	8.62819	8.16407	6.91904	6.54081	6.39818	7.01591	7.26961	6.05135	6.76633	7.78268	6.72169	8.36841	6.67068
ALDH1A3	10.8254	8.80305	8.74591	6.99023	8.32613	9.24906	8.09417	7.56929	10.1601	11.3445	6.99445	6.85409	10.1893	7.96717	8.23154	7.69616	8.47799	7.13596	6.49618	7.05344	7.20098	8.75132	6.62596	6.44816	8.73194	7.56336	11.8256	8.09435	7.72083	8.24935	8.09582	7.32024	5.3632	7.54638	7.05277	11.7829	6.0833	7.18257	7.57611	7.59675	5.22044	6.69673	6.47237	6.29693	6.78103	8.01274	8.48904	5.90751	7.33521
ALDH1B1	7.33958	6.7469	6.5015	6.89642	7.13925	7.15385	7.15629	7.52057	6.88275	6.98651	6.4751	6.7306	7.62832	6.66598	6.96822	7.00724	6.69204	6.51408	7.32228	7.1264	7.11547	6.71645	6.86505	6.86238	6.68829	7.17242	7.6377	6.99755	6.77893	7.07585	8.11574	7.21547	7.20429	6.80081	6.79422	6.63427	6.78608	6.91288	6.52336	6.75102	7.1192	6.76419	7.49684	6.79551	7.33452	6.88908	7.08688	7.16731	6.80505
ALDH1L1	7.48922	7.34128	7.31883	7.35291	7.47046	7.06829	7.89697	10.8662	7.73787	7.37202	7.17939	7.17818	7.33305	7.39279	7.17731	8.0492	7.26735	7.3875	9.6611	7.37007	7.10221	7.4248	7.39275	7.47	7.27333	7.49158	7.54107	7.12396	7.53003	7.25096	10.1635	7.30297	7.22354	7.31481	7.19858	7.20088	7.13138	7.31745	7.39497	9.89203	7.44782	7.16776	7.31856	7.32068	7.37062	7.19153	7.41123	7.82858	7.38231
ALDH2	9.89603	10.2703	11.2762	10.6538	9.53906	10.4098	9.66348	12.1872	10.6909	10.065	9.90105	10.0758	11.062	11.1344	10.5742	9.26754	9.79353	9.74597	10.8281	10.0677	9.42167	10.8526	9.83845	9.90067	10.0492	9.62668	9.63027	9.74933	10.5201	10.1657	11.792	9.93141	9.45926	10.0561	10.5676	11.2007	10.5418	10.2524	10.8831	11.5293	9.16574	10.2745	9.93649	8.59619	8.60769	9.80958	9.83957	10.235	8.84313
ALDH3A1	5.04937	5.24776	4.81935	4.86109	4.9616	4.8328	5.05821	5.28266	5.43003	5.23784	4.89455	5.07254	4.9807	5.18504	4.98938	5.16936	5.07101	5.00703	5.20072	5.00314	4.84642	4.57837	4.9577	4.89193	5.03676	5.17315	5.4611	5.11821	4.86895	5.07101	5.39462	5.11228	4.92867	5.08633	5.04407	5.21587	4.96723	5.29101	4.74246	5.03643	5.50252	4.89842	5.13255	5.02545	5.27205	4.81428	5.05344	5.32565	5.23093
ALDH3A2	8.74019	9.54607	10.1016	9.54484	9.7118	9.29947	8.79614	11.2894	9.36149	9.41991	9.39359	9.328	9.46724	9.54047	9.14156	10.2643	10.2089	9.57082	10.12	9.8736	9.29805	9.42198	9.68625	9.40855	10.0665	9.38897	10.0739	9.97427	9.6626	9.7395	10.6729	9.6512	9.52165	9.56449	9.83703	10.5311	10.091	9.73685	10.0057	10.6876	9.25817	10.1189	10.1625	9.12282	9.17745	9.82761	9.92759	10.0793	9.92516
ALDH3B1	7.46178	7.74552	6.77698	6.90704	6.64402	7.40717	6.85308	8.0815	7.4598	7.88736	6.90914	6.97954	7.73195	7.77159	7.45575	6.80245	6.90269	6.77056	7.39607	6.8994	6.79227	7.43135	7.29721	6.93451	7.19135	7.237	7.1718	6.81631	7.16254	7.47112	8.02728	6.90616	6.94538	7.07402	7.12039	7.49666	7.21628	7.24672	7.22348	7.98775	7.0432	6.87228	7.18749	7.15222	7.40086	7.27335	7.18332	7.92408	7.24739
ALDH3B2	3.92582	4.03309	3.79066	3.95306	3.88568	3.9902	4.0329	4.06676	3.73692	3.96617	3.68257	3.89206	4.01391	4.02847	4.03505	3.95975	3.94787	3.94312	3.61571	3.82511	3.77961	3.75115	3.70614	3.88609	3.79439	3.78482	3.93083	3.80772	3.79446	3.88581	3.81262	3.85361	3.75899	3.79284	3.78655	3.78117	3.88872	3.76868	3.79881	3.93981	3.92212	3.86729	3.83757	4.05466	4.29928	3.8044	3.70169	4.28972	3.90884
ALDH4A1	6.9621	7.14213	6.77414	6.75311	6.80281	6.84901	6.87277	8.96981	6.91666	6.77183	6.74015	6.94772	7.05622	7.14004	6.73409	6.81942	6.7645	6.69581	7.80606	6.92541	6.90287	6.72991	6.9879	6.87788	7.01649	6.98978	7.22611	6.7838	6.97274	6.90027	8.86644	6.87587	6.77985	6.83196	6.78402	6.90665	6.84003	6.9083	6.87227	7.92786	7.08695	6.8569	6.83746	6.73474	6.93284	7.008	6.9008	6.78748	6.9083
ALDH5A1	6.76219	7.87305	9.06993	9.67334	9.11029	8.59161	9.34324	9.83886	7.48734	6.56378	9.04519	9.15226	7.53256	7.29061	7.83364	9.50151	10.0119	9.56466	9.60868	9.82118	9.69613	8.41356	9.85173	10.0714	9.81874	9.2597	9.01774	9.77075	8.66172	8.13047	9.74003	9.58601	9.94679	9.18532	9.693	9.43232	9.82135	10.0126	9.58166	8.93731	9.92705	9.95554	9.17903	9.30835	8.17827	8.84031	9.80818	8.99661	8.66507
ALDH6A1	8.81614	9.42504	10.3439	10.3123	8.95274	8.92017	8.44276	13.1864	9.16712	8.23789	9.37098	9.06794	8.91802	9.14129	8.65014	9.17896	9.65272	8.90884	11.938	9.72394	9.76234	9.52528	9.41183	9.66301	9.69297	9.57612	9.11806	9.40483	9.6241	8.84731	12.5999	9.35629	9.43418	9.25792	9.69774	10.4125	10.1204	9.40052	10.2492	12.1187	9.68796	9.67403	9.34384	8.65825	7.08901	9.06244	9.73713	9.41155	8.63274
ALDH7A1	9.30423	9.62727	9.93662	9.95878	10.3215	7.63762	10.4044	11.5401	8.94669	8.52243	9.28771	9.30819	9.17808	8.88356	8.89784	10.1426	8.94162	10.2114	9.74577	9.67736	9.55604	9.17446	9.59015	10.0307	9.29022	9.15761	10.2024	10.082	9.27212	9.23801	10.4915	10.0289	9.49322	9.21406	9.5862	9.4282	9.37454	9.65981	9.61328	10.0163	9.92288	9.79851	9.90973	10.1189	9.4971	9.62713	9.91767	9.24497	10.1216
ALDH8A1	4.07505	4.19647	4.21408	9.95006	4.73136	4.8974	4.02536	11.9178	3.99197	4.5196	3.99227	4.07866	3.99734	5.1298	4.47502	4.69003	4.25522	4.17469	10.4121	3.96216	5.10021	5.98633	3.78172	4.67514	3.77203	3.98816	4.37213	4.06106	5.69978	4.66108	11.3124	3.90739	3.74182	3.84386	4.75152	5.37308	5.71091	3.97828	7.35644	10.4629	4.6848	3.78714	3.87296	5.58874	4.21843	5.13207	4.39729	8.5687	3.93374
ALDH9A1	10.5591	11.4569	10.7887	11.2288	11.3585	10.7763	10.7232	12.2512	10.7653	10.5622	11.1702	10.6605	11.296	11.4173	10.9047	11.4356	11.5287	11.0094	11.2992	10.9392	11.8668	11.2119	10.4429	10.8338	11.0772	11.2475	11.0145	10.9965	10.9169	10.9559	12.092	10.4513	10.6918	10.6288	10.8791	11.7851	12.867	11.822	11.3047	11.3887	10.6382	10.9307	11.4403	11.2554	10.3392	10.8021	10.9965	12.0295	10.7777
ALDOA	12.0319	12.024	10.9848	10.9363	12.2336	11.3695	11.9504	11.7133	11.9202	12.3523	11.1334	10.9972	12.0896	12.2375	11.8107	11.3742	11.7093	10.8461	11.6318	10.9993	11.2047	11.2948	10.5298	12.1218	10.9847	12.4354	12.6339	11.2033	11.3267	11.995	12.1534	11.3454	12.0636	10.8907	11.3096	12.2327	11.5483	12.043	11.469	11.6382	12.0661	11.2443	11.5325	11.4874	11.8719	12.1588	11.338	11.737	11.7131
ALDOAP2	4.97887	5.15483	4.67709	4.81434	4.9616	4.83768	4.8724	4.94985	5.07495	5.00893	4.9724	4.69004	4.72715	4.81101	4.9583	4.71	4.94583	4.93968	4.83848	4.80908	4.86431	4.59267	4.9577	4.99789	4.96624	5.05642	5.08255	4.83741	4.60857	4.74299	4.91999	4.74409	4.98899	4.82031	4.84066	4.82039	4.82097	4.79889	4.81526	4.9669	4.77699	5.08305	4.86339	4.90308	5.37023	4.82781	5.02455	6.05532	5.35506
ALDOB	6.47093	6.33096	6.52726	6.30016	6.29177	6.01431	6.35831	14.68	6.37472	6.72324	5.91722	6.49774	6.51502	7.65684	6.33082	6.43267	6.32977	6.31338	13.8102	6.49604	6.03944	6.2005	6.25544	6.46077	6.0808	6.42035	6.60663	6.36835	5.78585	6.29134	14.4372	6.39735	6.08858	6.83565	5.9127	6.77108	7.88911	7.02095	11.694	14.2005	6.38224	6.55881	6.68076	6.60604	6.51161	6.58737	6.48718	7.7354	6.93547
ALDOC	7.03014	6.92385	7.14556	6.53218	7.64007	7.07391	7.80005	7.21002	6.92643	7.43639	6.34792	6.39489	7.13495	7.23846	7.03014	6.79071	7.3537	6.77726	7.11887	6.62671	6.86368	6.84864	6.49819	7.94699	7.0231	7.20912	7.55333	6.3321	6.88931	7.15192	6.84062	6.29966	7.07886	6.54256	6.7142	6.78704	6.3146	6.77426	6.72669	7.33368	7.75115	7.00493	7.48409	7.48831	7.37612	6.27882	7.59122	6.98465	7.46484
ALG12	6.44601	6.51777	6.3453	6.37215	6.29673	6.1586	6.28948	6.49581	6.54517	6.73142	6.54867	6.39721	6.40674	6.37229	6.37571	6.08025	6.11896	6.28257	6.50867	6.57209	6.4673	6.25728	6.60035	6.63478	6.43621	6.42035	6.75255	6.40011	6.41221	6.37656	6.71702	6.24035	6.30629	6.32382	6.26166	6.35919	6.31374	6.38325	6.31533	6.31228	6.57235	6.29977	6.1367	6.17686	6.61954	6.4036	6.21301	6.69615	6.30469
ALG13	8.40204	8.66321	8.71238	9.0035	9.51729	8.4608	7.65823	7.82177	8.88666	8.3783	8.93033	8.82872	8.10886	8.90741	8.68526	8.15467	8.98446	9.0258	8.86964	8.89911	9.44799	9.01533	8.86874	8.74437	8.87357	8.52009	8.8059	8.96735	8.84485	8.6358	7.38032	8.67894	8.11724	9.22176	9.15786	9.28537	8.56403	8.4773	9.01088	8.81423	8.63372	9.6657	8.8618	8.66282	8.00246	9.23806	8.98481	7.98697	8.57816
ALG3	7.54012	7.46459	7.09403	6.95731	7.52067	7.38342	7.56843	7.61315	7.50266	7.66938	7.12271	7.19109	7.7903	7.68904	7.51144	7.19236	7.13191	7.39127	7.11799	7.2299	7.2554	6.91492	7.15687	7.71199	7.30282	7.54685	7.58605	7.36736	7.22567	7.50365	7.24025	7.61277	7.70603	7.13804	7.00403	7.10461	7.00338	7.31179	6.94028	7.07377	7.75527	6.88134	6.99954	7.092	7.14402	7.69049	7.31615	7.3848	7.11822
ALG5	9.8167	9.89257	9.85105	9.69264	9.87772	10.5127	10.2874	10.2744	10.2375	9.57767	9.95339	9.99121	10.0752	9.91394	9.87918	11.1752	9.93587	9.95018	10.4452	9.86404	9.98407	10.0406	10.2109	10.5455	9.98684	9.92118	10.6092	10.1392	10.1151	9.94389	10.0474	9.91762	10.3628	9.76488	9.98858	9.79471	10.1395	10.4661	9.96734	9.97693	9.82934	9.39008	10.8778	9.90821	10.3751	10.223	10.1645	9.70938	9.30994
ALG6	8.10482	8.9589	8.68655	8.59938	8.89486	8.54866	8.6526	8.19785	8.54444	8.58872	8.53796	8.60458	8.5446	8.53796	8.73519	8.80633	8.83005	9.00151	8.53284	8.21864	8.69587	8.71138	8.4786	9.1898	8.49735	8.10478	8.91326	8.40185	8.70666	8.52174	8.15211	7.96291	9.24932	8.471	8.20905	8.29642	8.07118	7.805	8.67367	8.24938	8.13375	8.71586	8.60088	8.84855	8.31394	8.81383	8.49854	7.95698	8.57093
ALG8	8.48967	8.29815	8.42055	8.23225	9.40077	8.96641	9.48065	8.55209	8.42732	8.42195	8.31841	8.77945	8.49777	8.61399	8.44528	8.85581	8.76049	9.27778	8.32555	8.59765	8.04088	8.39181	8.81734	9.63164	8.45351	9.13816	9.46169	9.04129	8.44632	8.60552	8.49556	9.26856	9.73873	8.41612	8.46078	8.06265	8.55022	8.12738	8.63669	8.1657	8.94039	8.33831	8.9163	9.21157	9.57855	8.90965	8.96828	7.86126	8.91955
ALG9	6.99057	7.3258	7.31467	7.45442	8.315	6.80584	8.03166	6.99681	7.15514	7.23938	6.87953	7.15759	7.10991	7.11358	7.20909	7.27758	7.02826	7.93053	7.08791	7.37282	6.13113	7.21995	7.34956	7.83916	6.68034	7.64449	8.17711	7.90459	7.20525	7.17646	7.03505	7.62092	8.00678	7.23505	7.21926	8.35775	6.79844	6.96314	7.36988	6.68004	7.5578	7.10142	7.54386	7.94932	8.18086	7.82909	7.62289	6.39292	7.36449
ALK	6.79789	7.61092	6.28479	6.13	6.32464	6.33418	6.82439	6.30837	6.71154	6.77783	6.82435	7.12559	8.12327	8.85337	7.6698	6.06949	6.28964	6.77797	5.98516	6.53271	6.16337	8.36638	6.51309	7.31427	6.87156	6.57001	6.30837	6.62724	6.36328	6.83139	6.36574	8.16769	6.3664	7.37805	6.23627	6.87118	6.20152	6.62458	7.07453	7.09911	7.43893	6.05421	6.3167	6.15181	6.70693	6.52846	6.18752	6.55565	6.37005
ALKBH1	7.84303	7.52753	8.16446	8.13681	8.25757	7.84236	7.38127	7.97409	7.83282	7.77494	7.86992	8.19356	7.75737	8.19301	8.05617	8.36639	8.05844	8.08795	8.28625	8.4551	8.39192	8.11024	8.3787	8.03281	7.96128	8.44185	8.7312	8.64389	8.13964	7.93341	8.16512	8.2695	8.06751	8.21005	8.05874	8.3613	8.67503	7.95412	8.05668	7.98388	8.41396	8.35017	8.82108	8.1563	8.51266	8.16305	8.21069	8.08149	7.7159
ALKBH4	6.14701	6.21021	7.071	6.97047	6.92004	6.80169	6.3501	6.61663	6.37622	6.66808	6.6261	6.66177	6.30647	6.44895	6.36945	6.7776	6.85827	6.74417	6.93084	7.37881	7.34823	6.29141	6.95739	6.91891	6.76985	6.89889	6.63741	7.00137	6.76985	6.73007	6.83284	7.02121	7.5412	6.97367	6.78956	6.92078	7.11932	7.06325	6.76014	6.22863	6.92552	6.84711	7.18878	6.1144	6.0635	6.21336	6.8685	6.72005	7.16511
ALLC	5.03973	5.079	5.09391	4.84049	5.14073	5.19158	5.17694	5.25296	5.0091	5.26564	5.02159	4.6581	4.89519	5.11691	4.69502	5.38057	4.9563	4.96748	5.17232	5.07101	4.95096	4.96899	5.35213	5.09391	5.02465	5.15112	5.40617	4.92613	4.88255	5.09188	5.09717	5.02238	4.96506	4.90753	4.84613	4.71951	4.64953	5.05488	4.76771	5.51106	5.58679	5.43382	5.4943	5.18033	5.64082	5.21646	5.24724	5.8274	5.39963
ALMS1	8.70109	9.33109	8.87098	9.33618	8.81491	8.45727	8.69876	8.83278	9.0158	9.89961	9.8966	9.5701	8.43614	9.27828	9.14481	9.31021	9.34985	9.56312	8.78491	8.84839	9.02687	9.07776	9.80534	9.26859	9.3464	9.5897	8.70302	8.87464	8.78009	8.86819	8.71549	9.02898	8.99554	9.53483	9.16472	9.12598	9.20669	9.13161	9.38847	8.93177	9.18777	8.71151	8.4468	9.23775	8.81872	8.666	9.44045	10.2741	10.3327
ALOX12	4.22867	4.17577	4.1525	3.88772	4.11816	3.97997	3.98679	4.4543	4.32801	4.6636	3.94122	4.03655	4.63481	4.09333	4.20214	3.91215	4.03208	3.98481	3.90282	4.00804	3.91123	3.8369	4.11676	4.35319	3.87828	4.06949	4.1328	3.95755	3.93975	4.12409	4.31177	3.94076	4.12312	3.96136	4.00182	4.0069	4.01129	3.97875	4.01473	4.14146	4.24203	4.06453	4.0262	3.96403	4.02112	3.93102	3.89124	4.27897	4.11981
ALOX12B	4.63499	5.04577	4.44507	4.51935	4.6288	4.43506	4.88332	4.91763	4.63218	4.82979	4.75671	4.6228	4.6288	4.67701	4.58853	4.68885	4.65049	4.60673	4.84508	4.73209	4.72793	4.52515	4.5137	4.35576	4.80282	4.79331	5.08226	4.63546	4.56799	4.70745	4.75823	4.6291	4.60697	4.38631	4.56812	4.61319	4.54916	4.52247	4.46084	4.38435	4.6288	4.41457	4.54941	4.24572	4.57137	4.70036	4.60516	4.977	4.73162
ALOX12P2	6.007	5.79668	5.7957	5.70947	5.73238	5.56224	5.7267	5.97053	5.80867	6.19851	5.77051	5.72515	6.02114	5.91527	5.72298	6.14225	6.12298	5.77494	5.9737	5.6718	5.39213	5.64733	5.74002	5.85928	5.76398	6.09859	5.77071	5.19478	5.63672	5.8709	6.01905	5.811	5.49948	5.69988	5.72798	5.70077	5.89748	5.56547	5.43622	5.99753	6.21136	6.30024	5.83607	6.23389	6.83114	6.00029	5.76821	6.61395	6.22224
ALOX15	3.97813	4.03167	3.8274	3.86893	3.97647	4.18621	4.00169	4.27612	4.2587	3.98488	4.25098	4.00412	4.03575	4.01305	4.0049	3.8273	3.9065	3.96006	4.11592	4.08498	3.90724	3.93078	3.9958	3.98493	3.95179	4.14458	4.22688	3.96339	3.89748	3.9944	4.2764	3.97603	3.90031	3.98724	3.89617	3.83658	3.9076	3.95711	3.78607	4.05555	4.06105	3.948	3.91854	4.02378	4.12593	3.93337	3.9855	4.55783	4.16838
ALOX15B	5.16062	5.3727	4.89866	5.06425	4.53223	4.45737	4.40376	5.33885	4.89371	5.26792	5.03806	5.11046	6.96893	7.59597	7.0797	4.29918	4.34664	4.71597	4.69586	4.76056	4.54297	5.76993	4.78098	4.91505	5.38183	5.14649	4.94869	4.64584	4.99712	4.87971	4.9305	4.58821	4.50084	4.72076	4.69624	4.27782	4.38045	4.78794	6.19539	6.08293	4.72066	4.71837	4.6565	4.77961	4.75809	4.63142	4.4981	5.1636	4.9865
ALOX5	9.81572	10.5857	8.18995	6.51518	6.88288	9.60929	5.3612	8.24007	10.559	10.6044	8.07249	8.44463	11.7963	11.9517	10.6905	6.00642	6.57093	5.08401	6.60784	6.36384	6.50027	10.9979	5.66557	6.2616	8.53852	8.83178	5.89674	6.75075	10.2346	10.7412	6.96456	6.4679	5.92788	7.28181	8.36176	8.84429	7.81623	8.20284	10.398	10.6543	6.44192	6.90671	5.64543	5.74735	4.8299	7.89151	6.16297	8.51614	9.53183
ALOX5AP	9.81769	9.95381	8.53903	7.64564	7.02155	8.58529	6.52827	8.97859	10.5822	10.7871	8.16108	8.18583	10.3302	10.7436	10.7767	7.20718	6.10877	6.28746	7.06532	7.29084	6.50065	9.98743	6.28653	6.05865	8.03316	7.14146	7.19757	7.16979	9.94534	9.46224	7.29998	6.45203	6.34671	7.84641	8.78061	8.49899	9.33138	8.86799	9.17076	10.6635	6.79287	6.95534	7.17564	6.90587	6.88546	8.39806	6.8496	9.48602	10.0304
ALOXE3	6.37773	6.47492	5.84077	5.89917	5.92065	5.92361	6.16339	6.05668	6.21686	6.29841	6.12751	5.66474	6.38732	6.45224	6.18105	5.98732	5.84021	5.82754	5.68935	5.81923	5.70394	5.93161	6.00607	6.00297	6.03759	5.95782	6.05918	5.65944	5.81516	5.81352	6.07292	5.85686	5.95738	5.7153	5.68209	5.60298	5.77216	5.76552	5.85904	6.21651	6.41558	5.80787	6.3591	6.12078	6.60342	6.03806	5.99543	6.31994	6.30469
ALPG	7.01856	7.10982	6.79904	6.61871	6.90671	6.78202	6.9334	7.18644	7.04953	7.1104	6.88229	6.90246	7.05197	6.8472	6.76851	6.80429	6.81692	7.01061	7.11641	6.94108	6.8764	6.80478	7.23515	7.16269	6.96487	7.21797	7.07724	6.79666	6.93641	6.85529	7.28632	6.88471	7.18838	6.90864	6.79785	6.70379	6.91826	6.9442	6.73119	7.17541	7.30566	6.87829	6.8602	6.95083	7.06044	6.72671	6.94256	6.85963	6.85342
ALPI	5.95115	5.71713	5.54584	5.66619	5.68572	5.47368	5.86243	6.00417	6.07413	6.11506	5.86798	5.80389	5.79222	5.82969	5.82786	5.79832	5.7575	5.92325	6.14901	5.8615	5.81868	5.57212	5.79789	6.04499	5.6944	5.83265	5.84837	5.77197	5.86481	5.90095	6.00767	5.80248	5.85217	5.7104	5.91365	5.55714	5.62091	5.89887	5.37231	5.82497	6.09402	5.46534	5.70924	5.5177	5.81699	5.40639	5.72022	5.84375	5.66344
ALPK1	7.41205	7.79164	7.41006	7.68845	7.55345	6.98594	7.41703	7.44526	7.56069	8.38135	7.98431	7.92571	7.5226	7.83951	7.78604	7.72184	7.95841	8.07316	7.45185	7.49777	7.2752	7.4839	7.83773	7.52682	7.66671	7.83886	7.59071	7.30913	7.34897	7.46511	7.54967	7.44318	7.53604	7.72313	7.60134	7.6376	7.62457	7.61792	7.61262	7.81566	7.59657	7.22601	7.10515	7.62058	7.35006	7.34776	7.66147	8.66248	8.02455
ALPK3	6.36123	6.26935	7.02064	7.05881	6.79006	5.90992	9.31937	6.62587	6.93751	5.7695	7.46194	7.94196	6.65713	6.4052	6.54139	7.50083	6.61474	6.25973	6.92221	8.18761	7.75359	6.93326	8.70866	6.70663	8.25803	8.9172	5.99394	8.94473	7.04908	6.90738	7.34839	8.19965	7.44376	8.13812	8.26256	5.59508	5.75633	5.82841	7.29433	6.95351	8.469	8.43553	6.73929	7.26886	6.77934	7.78373	8.52314	6.33847	5.60647
ALPL	4.49735	4.6883	4.23909	4.36639	4.11371	4.28351	4.10676	4.99063	4.48043	4.51056	4.17717	4.12521	4.44509	4.31228	4.31845	4.2506	4.25364	4.24477	4.87587	4.25708	4.22587	4.1348	4.31378	4.50005	4.32839	4.28554	4.30219	4.10761	4.21509	4.42129	5.3916	4.18073	4.27894	4.28229	3.99344	4.06976	4.2516	4.23457	4.06291	4.87447	4.44462	4.1508	4.14066	4.06844	4.66302	4.37076	4.12571	4.50545	4.56332
ALPP	5.18956	4.88647	4.93417	4.96477	5.02168	4.80316	4.88866	5.06593	5.24699	5.29245	4.72556	5.06415	5.18147	4.9798	5.00103	4.96186	4.67502	4.92154	4.79369	4.78521	4.64309	4.80676	4.78397	4.91649	4.84054	4.75286	5.01833	4.63462	4.64677	4.85181	4.81846	4.72667	4.81856	4.79779	4.68955	4.56053	4.7353	4.81972	4.47601	5.13274	5.3005	4.79471	5.25595	4.81143	5.04903	5.23984	4.74165	5.14261	5.00878
ALS2CL	7.48856	7.46037	7.21902	7.42678	7.18137	7.41038	7.50439	7.97563	7.45181	7.60291	7.22785	7.11753	7.35106	7.28572	7.27568	7.23728	7.03368	7.17747	7.75863	7.24994	7.03624	7.32235	7.31551	7.41921	7.39543	7.53003	7.78907	7.15522	7.32276	7.45196	8.2517	7.25403	7.31866	7.20474	7.13347	7.14347	7.08001	7.04984	7.1497	8.24848	7.87562	7.51473	7.79615	7.85752	8.40355	7.80617	7.52702	7.99125	7.91301
ALX1	5.79933	6.54423	5.42669	11.1457	5.61534	5.9858	5.68401	6.01554	6.30001	6.05807	5.69671	5.42743	5.70583	5.50652	6.77366	5.45083	5.55312	5.59179	6.30708	5.35829	5.46879	8.85705	5.48066	5.52278	5.44281	5.55462	5.80529	5.53799	7.81554	6.27964	6.07978	5.547	7.76057	5.92194	5.41858	5.34585	5.57522	5.30816	5.70904	6.10511	5.66164	5.50729	6.47162	5.65405	6.08653	5.83598	5.70013	6.22721	5.77334
ALX3	6.38939	6.59342	6.28053	6.12612	6.61039	6.60117	6.74808	6.63216	6.60334	6.49398	6.29817	6.2017	6.31592	6.31422	6.33003	6.14766	6.11974	6.53546	6.40527	6.27737	6.32994	6.20603	6.60283	6.61138	6.37152	6.67874	6.43907	6.34179	6.3139	6.50414	6.6783	6.30454	6.67198	6.33022	6.37528	6.37136	6.13142	6.33317	6.02686	6.08601	6.4487	5.87511	6.3532	6.20271	6.86214	6.13101	5.83654	6.39876	6.31677
ALX4	5.99498	6.01617	5.77087	5.85855	5.81025	5.73079	5.92424	6.02516	5.82169	6.14269	5.81271	6.02928	6.06665	6.11291	5.96575	5.77133	5.8925	5.83559	5.81957	5.63904	5.68983	5.67002	5.84445	5.82547	5.62451	5.73803	5.65941	5.83249	5.72082	5.78838	5.84783	5.81419	5.65821	5.75546	5.62498	5.55684	5.74449	5.67809	5.65914	5.76544	5.97803	5.98164	6.13709	6.09782	6.0915	5.97975	5.9215	6.24961	6.0706
AMACR	5.88682	5.85028	5.71919	5.7633	6.10982	5.82148	6.22411	6.02688	5.88101	6.06049	5.78829	5.77031	5.72071	5.787	5.80669	5.81046	5.86389	5.85438	5.91524	6.00873	5.68182	5.82205	6.17908	6.03269	5.88412	5.84879	6.14381	5.74223	5.61179	5.83827	6.00516	5.9011	5.66573	6.06049	5.97521	5.59486	5.70799	5.8427	5.66056	5.86306	5.83827	5.83323	5.94882	5.74494	6.15325	5.73077	5.81776	6.15382	5.53403
AMBN	5.71644	5.25261	5.09046	4.93556	5.10051	4.99723	5.12714	5.1442	5.17678	5.3508	5.09166	4.76461	5.47196	5.46352	5.09046	5.01312	4.69006	5.0049	4.73594	5.1189	5.02839	4.9089	4.92157	5.21321	4.98373	5.20821	5.11339	4.96265	4.9597	5.13957	5.14436	5.02067	4.80414	4.98157	5.09046	4.80985	4.93243	5.0609	4.92885	5.25739	5.09046	5.30139	4.91476	5.61231	5.17316	5.2451	5.33058	5.58775	5.6035
AMBP	6.48696	6.57976	6.08906	6.28053	6.34915	6.26597	6.44819	6.37393	6.28919	6.61868	6.20333	6.30616	6.9065	6.45592	6.40376	6.36568	6.21232	6.36607	6.14337	6.3398	6.03368	6.17807	6.11809	6.21867	6.24133	6.26303	6.30756	5.95007	6.07235	6.36615	6.26213	6.16497	6.39243	6.09628	6.03392	6.07093	6.26062	6.36174	6.04785	5.99073	6.30555	6.34978	5.87287	6.25646	6.63944	6.2029	6.19894	6.25213	6.14099
AMBRA1	8.78748	8.52123	8.55614	8.59401	8.76288	8.5121	8.77482	8.53241	8.61683	8.46059	8.66206	8.6915	8.78285	8.75737	8.61306	8.86059	8.89597	8.84127	8.90053	9.2346	8.69409	8.66725	8.93015	8.93734	8.78816	8.9369	9.21234	8.86945	8.76341	8.66821	8.73223	9.10613	8.79129	8.81099	8.81055	8.79129	8.97656	8.63001	8.63033	8.91659	9.37552	8.97832	8.85229	8.67004	8.99234	8.92284	9.13586	8.95168	8.76049
AMD1	10.2951	9.76699	10.019	10.054	9.7149	9.57931	10.3008	9.48679	9.58995	9.99309	9.58855	9.7521	9.4733	9.93987	10.4808	10.7139	9.56178	9.91184	10.3141	9.75059	10.7437	9.84748	9.69267	10.4742	10.2756	10.2406	10.0711	9.85353	9.90492	9.65915	10.056	10.4042	10.6948	10.1239	10.0924	10.0682	9.86647	9.57362	9.92527	9.58352	10.2154	9.93652	10.2831	9.72152	10.2262	9.98652	9.9067	9.23681	9.76738
AMELX	4.08338	3.7968	3.88297	3.88338	3.83597	3.91948	3.87895	3.80607	3.95436	4.03886	3.88474	3.89847	4.07645	3.97976	3.69302	3.948	3.91656	3.75664	3.8727	3.7643	3.89091	3.72017	3.98259	3.91282	3.98481	3.88595	3.91908	3.88395	3.87525	3.81303	4.0835	3.90882	3.91654	3.87995	3.80649	3.87158	3.84805	3.84161	3.84711	3.94668	4.1232	3.91282	4.13348	3.95162	3.96071	4.03856	3.83033	4.14624	3.82861
AMELY	5.11509	5.14065	5.18482	5.0194	5.0995	5.24935	5.33755	5.08937	5.25039	5.27854	5.20682	5.11057	5.19109	5.3125	5.23252	5.28353	5.27938	5.16488	5.08982	5.03409	5.11463	5.28147	5.19952	5.23037	5.2431	5.18692	5.52527	5.09756	5.02019	5.2105	5.43392	5.14145	5.17474	5.03453	5.11686	5.10448	5.03937	5.24095	4.93326	5.19126	5.46819	5.26792	5.14997	5.28543	5.48982	5.30119	5.28843	5.77041	5.57123
AMFR	9.25922	9.37959	9.77844	8.92236	8.1489	8.86563	9.22678	9.02908	8.9196	8.47134	9.06375	8.07515	9.66565	9.15583	8.76505	10.1207	9.2948	7.2041	10.5696	9.22419	8.81827	9.4668	9.37072	7.61758	8.93425	8.99952	8.07961	9.18982	9.47868	9.56016	10.2218	9.54484	7.9881	9.09979	9.50674	9.62984	9.01554	8.78793	9.48634	9.37719	9.61481	9.61565	9.41516	8.3361	8.58285	9.07389	9.50417	7.98371	6.67484
AMHR2	6.16947	5.96428	5.59518	5.71137	5.84995	5.93545	6.87933	6.21263	5.85768	6.25225	5.84885	5.99116	6.2372	6.08449	6.01842	5.90114	5.73611	6.31489	6.04782	5.87299	5.4679	5.63279	5.89141	6.04499	5.99116	6.0034	6.19266	5.38726	5.67016	6.14708	6.18245	5.76832	5.73435	5.61076	6.08762	5.59942	5.81786	6.14962	5.5231	6.09208	6.44344	6.20709	5.83746	6.54936	6.01549	6.14099	5.8922	6.18986	6.36074
AMIGO2	10.1705	9.25743	7.67842	6.77205	7.88151	8.89428	6.02892	8.83452	10.2209	10.3623	8.70679	8.58474	10.9337	10.3573	9.29705	9.81382	4.33365	6.22117	7.95273	7.2085	8.71093	10.3653	5.80877	5.65753	7.798	8.23541	4.71428	7.08405	9.9503	10.2802	9.24139	6.03547	7.14925	7.39473	8.14285	9.5212	8.61315	8.32359	8.93793	10.3336	4.92328	5.12639	4.95007	5.5748	5.14325	7.3246	5.5338	9.33602	5.85434
AMMECR1	8.14956	7.70595	8.32569	8.91219	8.51353	8.55102	9.1927	7.85718	7.7428	7.55029	8.27482	8.33575	7.75391	7.279	8.37517	8.13287	8.48063	8.98729	8.0951	8.67305	9.29179	8.46167	8.4586	8.04587	8.35627	8.52056	7.9246	8.74798	8.25681	8.48142	8.06538	8.72773	9.15262	8.54131	8.29387	7.55896	7.9504	8.10086	8.28131	7.66796	7.95439	8.21018	7.97898	8.41108	8.4098	8.31514	8.30578	7.77454	7.19135
AMN	7.43235	7.28659	7.04017	7.14614	7.27914	7.0219	7.29468	7.69658	7.45651	7.58339	7.14946	7.15209	7.36434	7.40942	7.17323	7.31299	7.35061	7.37871	7.79832	7.51616	7.31018	7.14348	7.43167	7.65864	7.43358	7.55833	7.80498	7.25627	7.34305	7.40726	7.97961	7.45622	7.47424	7.35955	7.3314	7.45834	7.34252	7.43537	7.07627	7.50398	7.73798	7.26841	7.55217	7.46731	7.41438	7.324	7.31741	7.47867	7.56931
AMOT	4.05133	4.06414	4.48071	4.58853	4.37387	4.23501	4.27657	4.59875	4.03865	3.69302	4.29419	4.00934	3.7982	3.8274	3.9067	4.03224	4.39484	4.34911	4.20996	4.34706	4.22214	4.00406	4.28606	4.43854	4.56847	4.2038	4.2183	4.23672	4.27609	3.8963	4.08603	4.38087	3.98543	4.12725	4.34815	6.07756	5.01119	4.40391	4.45244	4.33618	4.59905	5.17828	4.57568	4.39213	4.61441	4.15061	4.2376	4.75331	4.49392
AMOTL2	9.67773	10.0331	10.7397	11.084	10.1517	10.6665	10.006	10.8156	10.3998	9.37097	10.5995	10.5476	9.6273	9.05357	10.7849	9.00848	7.98269	9.99369	11.0794	11.2874	9.99491	10.858	9.62787	10.4371	10.6416	9.3611	8.89476	10.6459	10.6837	10.7889	10.6277	11.1114	8.92274	11.6617	10.9472	11.8828	11.3262	10.7974	11.1081	10.8341	9.67116	9.4139	9.62924	9.38901	8.91791	10.0393	10.1284	10.5239	7.71168
AMPD1	4.83588	5.73324	5.0715	5.47543	4.95935	5.07145	4.97904	5.08975	4.95144	4.95289	4.66048	4.78956	4.91593	4.92853	5.08113	5.00149	5.07762	4.93435	4.76004	4.65349	4.92613	5.04163	4.83997	4.95248	5.42202	4.79077	4.92476	4.86176	4.86748	5.05813	4.84316	4.58813	4.95925	4.61122	4.76166	4.6321	4.80688	4.67062	4.77099	5.11383	5.00405	4.98097	5.33054	4.55064	4.95353	5.1453	4.911	5.72862	4.75469
AMPD2	9.03742	8.40315	8.14003	8.39959	8.12546	8.27403	8.1306	7.96929	8.48868	8.73638	7.93495	7.99267	8.44246	7.99598	8.93498	7.13612	8.27027	7.91217	8.26699	8.63911	8.25124	8.19719	8.42526	8.05718	7.59014	9.21635	7.98708	8.60637	8.24113	8.67943	8.11706	7.57768	8.97312	8.02478	8.30387	8.24891	8.20505	8.23855	8.20074	8.14961	8.19198	8.05932	7.68449	7.61694	7.80357	8.30391	8.07376	7.5289	8.44943
AMPD3	7.70724	8.87656	7.19379	7.19477	6.9956	7.69094	7.76777	7.42822	8.72229	9.45036	7.75005	8.02163	8.77679	8.81802	9.11036	7.00618	7.82133	7.68196	7.43145	7.95123	7.03612	7.9165	8.45738	6.88411	7.74982	7.89888	7.39487	8.46432	7.91754	8.43386	7.31263	8.11052	6.9158	8.35809	7.9713	6.94297	6.98908	7.74578	8.44041	8.22142	7.3697	8.85427	7.20542	8.05656	6.58767	6.88879	8.08455	6.95269	7.94493
AMPH	6.68394	5.88879	9.44979	7.25725	7.87629	7.74264	6.69832	5.89388	6.42591	7.0915	7.51367	7.44288	6.25808	5.54714	6.65318	7.81845	9.12893	8.53023	8.46586	7.92882	7.52758	7.33325	7.41701	7.63238	7.39543	7.31575	7.77434	7.13379	7.35061	5.93575	5.85306	7.04955	7.92971	7.10535	7.7486	7.03267	9.37106	6.06332	8.22177	6.11969	8.41337	8.26691	9.02034	7.20949	8.06672	7.46194	7.70186	8.43115	8.34655
AMT	7.1749	7.86842	8.30345	8.4035	7.12582	6.92872	8.19021	9.20202	8.0869	7.86951	8.11714	8.79653	7.19844	7.38756	7.48764	8.45387	8.81953	6.6733	8.88702	8.94548	7.73192	8.23525	9.21229	7.20592	8.42796	8.67414	6.93936	8.21309	8.34815	7.8126	9.10799	8.41365	6.56859	7.912	8.65563	8.49556	7.73199	7.64388	8.79259	8.62941	8.96962	8.87651	8.82509	7.80309	7.91314	7.00556	8.22702	7.4674	7.27904
AMZ2	10.2057	10.509	10.3123	10.2834	10.6812	10.7043	10.926	10.5309	10.3664	10.0276	10.4156	10.2483	10.1342	10.2931	10.3854	10.9356	10.9419	10.5471	10.4997	10.6445	10.7417	10.1385	10.5868	10.433	10.2975	9.47928	11.0002	10.5947	10.3999	10.2064	10.354	10.5306	10.5788	10.2225	10.4833	10.6447	10.8036	10.2555	10.5943	10.2915	10.534	10.4931	10.7984	10.715	10.7184	10.3114	10.3675	10.4562	10.5184
ANAPC10	7.70442	8.23976	8.43734	8.0457	8.51853	8.15109	8.12522	7.8949	8.30541	7.85222	8.04815	8.32253	8.20745	7.96881	8.24866	9.30029	8.51323	8.33366	8.68406	8.42784	8.48333	8.13022	8.199	8.30355	8.10337	7.12957	8.61442	8.51196	8.29273	7.91742	7.80931	8.38747	8.85399	8.34581	7.98766	8.33622	8.23437	7.46775	8.11385	8.16382	8.06015	8.42056	9.10558	8.3506	8.6336	8.37471	8.2169	7.47676	8.14573
ANAPC13	10.4196	11.0906	11.1467	11.1707	11.502	10.9698	11.5073	11.178	10.8587	10.4741	10.9988	11.1467	10.8161	10.6446	10.7483	10.863	11.1163	11.4175	11.3496	11.5148	11.4198	11.0627	11.3171	11.8121	11.6419	11.0991	11.3807	11.3255	11.1942	10.7766	11.4751	11.3686	11.4751	11.2848	11.1461	10.9492	10.8612	11.3932	11.1016	10.8502	11.6162	11.4711	11.3117	11.7057	11.6529	11.6956	11.3957	10.5612	10.9226
ANAPC15	7.20434	7.45575	6.84067	7.20571	7.65359	6.98691	7.95079	7.34069	7.23124	7.46174	6.76292	6.99534	7.44641	7.26558	7.27461	8.08266	7.1633	7.46789	7.35932	7.35112	6.81568	7.03957	7.28474	7.74951	7.14762	7.7771	7.63626	7.53291	7.2204	7.45386	7.33298	7.55458	7.49393	7.24483	7.11471	6.93377	7.04447	6.89533	7.07928	7.34269	7.60178	7.07363	8.20197	7.8034	7.79363	7.48499	7.31695	6.9949	7.38793
ANAPC2	6.28465	5.97651	6.14162	6.13	6.08912	6.15126	6.45817	6.04731	6.22245	6.42854	6.02643	6.23163	6.04374	6.2928	6.33245	6.22245	6.21801	5.99594	6.14079	6.24734	6.29909	6.05543	6.18682	6.06612	6.28525	6.22344	6.1145	6.14932	6.24917	6.22245	6.23533	6.28716	6.1496	6.14887	5.99755	6.22245	6.57123	6.02297	6.25577	6.18917	6.91254	6.36516	6.67629	6.18502	6.16202	6.40638	6.32709	6.62718	6.38063
ANAPC5	9.91825	10.1567	10.6253	10.3427	10.4484	10.6049	10.7183	10.1508	10.2675	10.3769	10.3473	10.5453	9.87193	9.7744	10.14	10.4388	10.225	10.7014	10.3988	10.2747	10.6236	10.2427	10.6427	11.1329	10.8641	10.7638	10.6533	10.6251	10.4163	10.4183	10.0578	10.1988	10.5757	10.4464	10.4574	10.3862	10.5631	10.3261	10.486	10.1042	10.867	10.3632	10.7337	10.7223	10.3704	10.542	10.334	10.1552	10.2324
ANG	6.95073	6.862	7.25029	6.21456	5.62457	6.18983	5.50515	8.32216	7.71451	6.76755	6.11355	6.21104	7.52229	8.5715	6.72024	5.87531	5.70863	5.42328	7.3026	6.11318	5.80524	7.04696	5.35639	5.6703	5.9041	5.6576	6.02179	5.28609	7.31448	7.06111	7.97811	5.99668	5.68019	5.13387	6.17862	7.6432	6.61935	7.8662	6.96312	7.61741	5.19053	5.33678	5.4193	5.39101	6.34104	7.06428	5.87321	6.44394	6.01135
ANGEL1	7.31777	7.75654	7.44469	7.2793	7.61474	7.43386	7.40985	7.11883	7.36893	7.86957	7.56582	7.70321	7.96886	8.11248	7.71776	7.73614	7.42893	7.62083	7.582	7.5802	7.35326	7.44898	7.85061	8.15518	7.47808	7.85857	7.54107	7.40601	7.28383	7.50483	7.35295	7.61474	7.79242	7.43526	7.56132	7.38945	7.64223	7.41066	7.8018	7.27277	7.87713	7.79983	8.01467	7.59898	7.38859	7.5101	7.90201	7.15843	7.70292
ANGEL2	8.31622	8.9045	9.80251	9.29123	10.0671	9.59399	10.0231	9.01178	9.15812	8.72203	9.4996	9.51709	8.52767	8.97057	8.87409	9.57346	9.78839	10.1497	9.531	9.72691	9.56568	9.32631	9.68887	10.3573	9.63913	9.43424	9.5296	9.6726	9.38894	8.99319	8.52983	9.77263	9.82503	10.0478	9.65299	9.50864	9.12144	10.297	9.63743	9.30206	9.86727	9.7691	9.78599	10.3172	8.80358	9.50612	9.7129	9.48391	9.80944
ANGPT1	7.8279	9.40403	11.0323	10.719	7.08995	9.57094	4.98707	8.89458	7.83745	9.60043	9.69289	8.3475	6.91119	7.16295	9.01188	8.12067	7.23213	7.85226	8.77396	8.9264	9.45933	9.09251	8.35723	5.52735	8.64322	7.82747	5.42382	8.87675	9.33239	9.07056	8.94457	8.26923	7.97326	9.00813	8.70704	8.8821	9.16615	8.48991	7.9071	8.13788	3.7991	7.65043	9.44098	7.76388	7.8671	7.89348	8.93303	8.45573	5.41817
ANGPT2	8.44499	8.84675	8.64105	9.22774	7.7803	8.06015	8.67722	6.52834	9.14452	9.0996	8.88657	7.10392	7.56173	6.88303	8.77242	7.18444	6.43573	6.65203	5.62279	6.79799	7.2492	7.61024	5.31403	7.5389	6.93746	6.98898	6.06174	7.5115	7.41908	8.79632	6.28074	5.85969	8.82894	6.69129	8.53523	8.90811	10.4128	9.27571	7.11591	7.00843	5.41625	6.66399	5.38615	6.15813	7.47274	7.61159	6.56394	6.18195	6.04771
ANGPT4	7.33904	7.35618	6.86379	7.03077	7.20541	6.92356	7.18267	7.10312	7.22937	7.27626	6.73245	6.98069	7.30812	7.26554	7.18694	7.23587	6.962	7.19684	7.04093	6.80869	6.7537	6.89153	7.12856	7.01373	6.89454	6.8502	6.94035	6.65473	6.82432	6.96691	6.8571	6.70809	7.02868	6.8581	6.70204	6.58337	6.90196	6.97365	6.74561	7.11187	7.17656	6.91347	7.25968	7.04978	7.32517	7.16223	6.96418	7.35451	7.29073
ANGPTL2	9.70537	8.67391	9.48573	9.06379	8.20809	9.64606	7.00046	8.13735	10.0749	8.51754	9.74386	9.07343	9.64171	8.02816	9.29726	6.13397	6.50428	8.4148	7.13957	9.59642	8.85355	9.54569	7.80325	7.63371	10.0694	8.02848	7.93303	9.47977	10.3544	10.2374	7.43798	8.72652	7.60929	8.57252	9.86218	8.92946	6.95103	7.81842	8.82045	8.65088	6.95753	7.58445	7.52869	7.04489	7.25006	8.79717	8.43919	7.31473	7.34652
ANGPTL3	3.70687	3.59172	3.44981	5.53682	3.61846	3.74301	3.81831	8.4465	3.71225	3.97394	3.67867	3.67529	3.59255	3.71821	3.52535	3.64435	3.55892	3.67979	6.44194	3.55082	3.74938	3.55571	3.77142	3.83062	3.61436	3.72452	3.92035	3.56392	3.55094	3.67022	7.45981	3.56948	3.51484	3.58541	3.51063	3.53266	3.6077	3.56378	4.40201	6.83796	3.61944	3.972	3.56524	3.84812	3.94328	3.63311	3.82769	3.67341	3.79812
ANGPTL4	10.2891	6.97879	6.41717	6.77944	6.60734	7.0975	6.73261	7.29084	7.63381	8.58627	7.00777	7.11492	7.93216	6.8472	8.26404	7.1264	6.54592	6.58895	6.88236	6.60878	6.92101	6.10007	6.52866	7.12024	6.67592	6.81328	7.39968	6.9066	6.42601	7.279	7.31567	6.46792	6.93157	6.58801	6.58298	6.88661	6.5792	6.93551	6.23574	6.24898	7.02135	5.9238	6.92038	6.51542	6.71021	8.15895	6.34753	6.74349	7.28798
ANGPTL7	5.45426	5.31407	7.57373	5.18523	5.04037	5.19493	5.09244	6.10111	5.1767	5.33844	5.08316	5.0705	5.17824	5.17468	5.17257	5.15678	5.13529	5.01567	5.5221	5.22098	5.03479	4.90698	5.17257	5.12965	5.17257	5.05746	5.19528	5.05435	5.17836	5.08714	5.17747	5.06283	4.98886	5.24033	5.36117	5.23596	5.05833	5.06316	5.14001	5.48122	5.36698	5.0561	5.19639	5.1477	5.60547	5.16412	4.93959	5.70343	5.27413
ANGPTL8	5.37037	5.07829	5.02886	5.19604	4.99905	4.95345	5.34111	5.39006	4.89037	5.26503	4.95485	5.17499	5.23814	4.98608	5.16592	5.11244	5.25669	5.17335	5.49303	5.08474	4.97527	5.05419	5.26421	5.168	4.97728	5.13672	5.19348	5.05528	5.14591	5.1134	5.22287	4.98922	5.27675	5.21681	4.99069	5.09631	4.88582	5.0623	4.8654	5.22045	5.42263	5.38073	5.35275	5.26402	5.68578	5.08301	5.4129	5.52804	5.54077
ANK1	6.06613	6.40929	5.94613	5.75457	5.96134	6.16519	6.16659	6.27399	5.9167	6.4311	5.84777	5.93315	5.95745	6.11885	6.19507	6.13106	5.77817	5.7591	6.15027	6.13826	5.77253	5.81627	6.07637	5.8467	5.88426	5.93126	6.02989	5.73997	5.98309	6.12976	5.99732	5.86367	5.77431	6.06369	5.75354	5.62179	6.03685	5.74234	5.757	6.08741	6.73674	5.94144	6.1212	6.02093	6.60146	6.33875	5.97391	6.62348	6.27279
ANK2	10.2381	8.72701	8.09457	9.25356	7.84328	7.94616	9.16162	11.0066	9.48744	8.26601	8.5968	9.13353	6.42487	6.00345	8.85683	5.2993	8.41592	8.7598	10.8483	7.94779	8.93163	8.9465	8.49823	8.77558	8.92196	7.66689	9.16119	8.7185	8.72861	8.48436	11.6591	10.0794	8.41742	8.43071	9.9806	8.20871	9.40853	8.62612	9.46895	10.8566	7.0152	9.43098	7.76797	7.40043	9.28362	7.65011	6.09981	9.06999	4.96604
ANK3	7.64265	7.66559	9.33862	10.3759	9.80841	8.58285	10.2313	11.7782	7.92431	7.76981	9.17633	9.07057	6.69946	7.47235	8.31744	9.83443	9.37296	9.79378	11.0068	9.43404	9.85037	9.81134	9.32223	10.1289	10.0693	8.87955	10.0031	9.90455	9.8041	8.6365	11.7738	9.83649	9.583	9.17406	10.0371	11.4976	10.3201	10.0983	9.91459	10.5266	8.71834	9.71976	9.60423	9.74362	9.08205	10.0274	9.33071	10.8111	9.86061
ANKEF1	5.32029	5.20601	5.19765	5.40112	6.52681	5.61772	6.02112	5.63415	5.13967	5.21523	5.33091	5.68613	5.49368	5.34136	5.34298	6.44786	6.61996	6.09893	5.65939	5.17252	6.47419	5.76303	5.34117	6.06543	5.79662	5.93668	5.64566	6.07192	5.54995	5.53306	6.60587	5.70076	6.77074	5.36569	6.02124	5.78139	6.11692	5.87629	5.73283	5.75156	6.34539	6.04276	5.64659	6.27143	5.47661	5.04651	5.80084	5.8871	5.52568
ANKFY1	6.98012	7.35616	7.50243	7.29258	6.75671	7.71453	6.52901	6.90963	7.12378	6.7824	7.0671	7.157	7.25592	7.1457	7.03907	6.5267	6.86245	7.25524	6.54642	6.77444	6.07901	6.93666	6.82539	6.70675	7.01201	6.0899	6.52141	7.10167	6.72462	6.91797	6.60812	6.63317	6.83936	6.85323	6.72115	6.93208	6.80966	6.5043	6.50013	6.61137	6.69126	7.15735	6.88385	6.75013	6.91696	6.77261	6.66746	6.68867	6.27921
ANKH	6.7244	6.4252	7.5849	6.34545	5.53593	6.61608	5.56546	5.70986	6.26741	5.6089	6.07976	6.2186	6.83707	6.16629	5.96907	5.79505	6.17005	5.74927	6.65059	6.16136	6.36423	7.87957	5.63947	5.29087	6.12981	5.64753	5.21067	7.25048	6.70467	6.7946	5.67964	5.42169	4.96101	6.07776	7.74036	7.67153	7.20122	6.85608	7.44544	7.20042	5.20796	6.11621	6.45527	5.59826	5.48696	6.50418	6.12022	7.72561	4.92045
ANKLE2	8.4259	7.71901	8.27088	8.1059	8.22313	8.67114	8.18007	7.13824	7.95847	8.48813	7.74418	8.08748	7.72638	7.35055	8.21031	8.26498	8.40729	8.55652	8.1819	8.04265	8.68199	8.19538	8.44083	9.24805	8.35543	8.2285	8.27242	8.40283	8.07962	8.29342	7.48697	8.84917	8.506	8.80285	8.24161	8.22601	8.64429	8.17739	8.50408	7.81404	8.64101	8.37333	7.94127	8.19129	7.69359	8.2226	8.18121	7.72684	7.72865
ANKMY1	6.12744	6.18764	6.23138	6.35025	6.42477	6.20753	6.84284	6.30391	6.33231	5.99447	6.47136	6.61575	6.06976	6.23211	6.07375	6.172	7.23457	6.35025	6.52967	6.74332	6.56303	6.10608	6.62745	6.76199	5.97334	6.34792	6.48882	6.95835	6.16868	5.94181	6.13877	6.45049	6.41615	5.9681	6.36266	6.13907	6.49535	6.68298	6.57749	6.58767	6.63957	6.14445	6.48882	6.15107	5.99074	6.20077	6.38511	6.26117	6.69801
ANKMY2	9.07098	9.58029	10.1127	9.81279	9.03023	9.6042	9.69751	9.56563	9.55003	8.83915	9.57616	9.27648	9.16889	9.54926	9.43797	9.39565	9.35228	9.26581	9.52195	9.43955	9.03874	9.69914	9.36536	9.22706	9.1557	8.10916	8.30723	9.49813	9.59041	9.40498	9.54082	9.31157	9.38548	8.4469	9.47412	9.68332	10.0954	9.72949	9.61371	9.18564	8.15006	9.45723	9.50049	8.97632	9.6346	9.59105	9.23657	9.39805	7.62752
ANKRA2	7.95694	9.03765	9.41734	9.45273	9.01874	8.60168	8.34647	8.57992	9.12642	8.22533	9.44664	9.50483	8.21181	8.77836	8.74342	9.21876	9.09015	9.13868	9.44588	9.56253	8.76499	9.33506	9.80781	9.3829	9.24974	8.18214	9.39307	9.81221	9.16378	8.94745	7.97673	9.33074	8.18246	9.02428	9.10541	9.27209	9.35418	9.14868	9.52686	9.14978	8.87411	9.48523	9.67208	9.94898	8.84264	8.73259	9.22705	8.45241	9.0099
ANKRD1	7.91191	4.61993	3.79792	3.85168	4.05819	4.13691	5.31967	4.32221	4.16506	4.28606	3.94388	4.43573	4.21352	4.3719	4.60228	4.6615	3.88685	4.0734	4.51096	3.98881	3.73221	3.98432	4.05893	3.97641	4.17102	4.22588	4.09408	4.03368	4.2059	4.1639	4.35603	4.09447	3.88087	5.06001	4.69073	3.75	3.82216	3.86976	4.6134	4.41863	4.33242	4.20896	4.45272	4.17501	4.80621	4.85598	4.11441	4.50565	4.35808
ANKRD10	9.49949	9.79017	9.72192	9.94316	10.0101	10.1375	10.0192	9.70671	10.4699	10.2673	10.2375	10.4512	9.87945	10.2163	9.91918	10.043	9.6346	10.275	9.62425	9.9758	10.1294	10.6487	10.3037	10.8105	9.85175	8.90741	9.89366	9.9726	10.4301	9.86986	9.8027	10.0745	9.44667	10.0245	9.88443	9.50232	9.83224	10.4919	9.94857	10.3318	9.26545	10.0125	9.34545	11.1972	10.2017	9.41962	9.53902	9.2421	10.0702
ANKRD10-IT1	8.70798	9.29715	8.91853	9.11527	8.9056	8.8507	9.22587	9.05417	9.18051	9.70538	9.57585	9.71239	8.73921	9.18784	9.06529	8.88932	9.42957	9.45128	8.7956	8.78635	8.71984	9.06188	9.65074	9.15307	9.17431	9.37533	8.53895	8.95548	8.8587	8.94336	8.93553	9.03355	8.99986	9.11659	9.10378	9.0747	8.96394	9.23846	9.2341	8.99079	8.90361	8.73696	8.29072	9.33623	9.0519	8.96895	9.20383	9.83428	10.0851
ANKRD11	8.95261	8.95383	9.28401	9.52969	8.61677	9.02236	9.62615	8.48593	8.80988	8.49446	9.3005	9.4931	8.45569	8.6166	8.95813	8.46562	9.74577	8.6248	8.7868	9.74981	9.52012	8.94657	9.68297	8.70511	9.18019	9.91936	8.84495	9.58036	8.95383	9.04831	8.63469	9.4759	8.8479	9.04917	9.25151	9.34515	8.64646	9.20602	9.35195	8.51846	9.00534	9.17803	7.86487	8.1747	7.39125	9.2001	9.24871	8.60402	8.05812
ANKRD12	9.34766	9.63015	9.67087	9.91841	8.62374	9.19181	8.40463	9.03744	9.41938	9.37418	9.42276	9.25718	9.23071	10.0413	9.48278	8.76665	9.7984	8.78526	8.21321	9.13276	9.22215	9.73329	9.1353	8.50174	9.50631	9.03337	8.26644	8.99953	9.32455	9.33754	9.33596	8.56333	9.10449	9.18251	9.27449	9.37913	9.5772	9.31011	9.46321	9.19177	9.16723	9.0865	8.20339	8.88672	7.4463	9.58966	9.01361	9.12289	8.93916
ANKRD17	8.90706	9.07707	9.13197	9.24863	9.76942	9.14807	9.34481	8.67007	8.65866	8.76475	9.36728	9.39067	9.0923	8.98616	8.94397	8.96269	9.71179	9.47398	9.1897	9.51733	9.62826	9.13834	9.57555	9.70101	9.43829	8.8637	9.76271	9.72113	9.0407	9.09834	9.30266	9.59658	9.70942	9.40406	9.56282	9.42449	9.37657	8.96166	9.45584	8.85588	9.21887	9.81283	8.60696	9.37309	9.09737	9.29021	9.46071	8.56836	8.62581
ANKRD2	5.92543	5.54103	5.29605	5.14461	5.28493	5.24627	5.59826	6.04345	5.62371	5.65421	5.41565	5.4095	5.75847	5.26322	5.6767	5.69216	5.28664	5.50065	6.0561	5.47993	5.5349	5.19137	5.47993	5.69926	5.48114	5.6899	5.76474	5.50676	5.33662	5.65124	6.25142	5.38517	5.4804	5.31989	5.24306	5.3784	5.54314	5.41565	5.03711	5.31926	5.33929	5.38116	4.90203	5.14058	5.61412	5.31288	5.15959	5.73982	5.43163
ANKRD26	5.84395	6.09691	6.89432	6.8173	6.07619	7.19971	7.18877	6.16228	6.36875	5.76785	6.42286	7.00553	5.579	6.02132	6.1909	6.24541	7.25486	6.59212	6.25928	6.79515	6.65508	6.24251	6.70663	6.99161	6.5114	7.0045	5.66633	6.40174	6.51607	6.11553	6.27194	6.80847	7.46463	6.09639	6.13339	6.80876	6.06829	5.90453	6.36678	5.73839	6.59009	6.32848	6.37381	6.61233	6.03438	6.2442	6.25559	5.61306	5.85295
ANKRD27	8.72195	8.91396	8.95016	8.81243	8.72871	8.84732	8.52168	8.64019	8.78511	8.48997	8.85008	8.64424	8.54147	8.98274	8.94141	7.65551	8.98658	8.36862	9.13844	8.81932	8.6285	9.2892	8.80179	8.70822	8.37323	9.33334	8.65698	8.46779	9.01943	8.91853	8.92672	8.89386	9.54746	8.71329	8.83582	9.39806	9.47743	9.43258	9.08244	9.04577	8.43277	8.87461	8.57116	8.08138	7.87772	8.90741	8.80518	9.26218	8.82925
ANKRD28	9.68812	7.83743	8.12185	8.35167	7.67898	7.89379	8.33201	8.50219	8.1037	8.52346	7.66779	8.0937	8.31273	7.80711	8.71608	8.35413	8.19152	7.87195	8.3971	8.08232	8.23073	8.19152	8.25018	8.38852	7.96628	8.35818	8.3289	8.01939	8.17272	7.76233	8.26056	7.90062	8.19152	7.86502	8.30725	8.6495	8.25987	8.15141	8.22354	8.21377	8.1853	8.38273	8.04838	8.08484	8.59623	8.07436	8.31644	8.34336	7.20787
ANKRD34C	4.12328	4.2144	4.09547	4.62188	4.37117	4.33297	4.81237	4.38968	4.1378	4.20841	4.08428	4.03988	4.1147	4.19909	3.95157	4.4626	4.30811	4.31769	4.17327	4.01598	3.98082	4.17898	4.06967	4.25777	4.14166	4.14885	4.18491	4.14279	4.09977	4.18885	4.1012	4.18666	4.30843	4.79296	4.18833	4.04733	6.84891	8.21348	3.97004	4.44546	6.67183	4.42117	4.40026	4.13999	4.98545	4.17598	4.22128	4.65395	4.33598
ANKRD36	7.91033	8.59939	9.86909	9.38981	9.31515	8.47937	8.37454	7.74605	8.37839	7.71948	9.31556	9.24367	7.63061	8.83015	8.25217	9.4893	9.78386	8.94384	8.21381	8.93455	9.26312	9.1877	9.8164	8.89825	8.43305	8.12035	8.80581	8.33192	8.80646	8.4969	7.39569	8.77794	7.57759	9.2602	9.0823	9.23476	8.56714	9.68384	9.37752	8.29758	7.94804	8.49328	9.10027	9.428	7.42388	9.27091	8.51747	7.13635	8.71101
ANKRD36B	8.48543	9.24072	9.42305	9.95015	9.9676	9.3423	9.70087	8.58043	9.35314	8.93576	10.6114	10.4783	8.21181	9.75429	8.95661	9.89785	10.044	10.3205	8.25188	9.31375	9.4018	9.6037	10.625	9.70366	8.84725	8.43333	9.59832	9.00169	8.81575	9.252	8.15913	9.73873	7.1517	9.58663	9.85446	9.59958	9.40643	9.71344	9.94975	10.095	9.25101	9.32759	8.97444	12.1377	9.29136	9.63986	10.3442	7.51861	10.9283
ANKRD36BP2	3.54829	3.39738	3.3526	3.39741	3.49792	3.4944	3.42766	3.39502	3.62069	3.58184	3.65543	3.60363	3.44995	3.48179	3.67013	3.49104	3.62023	3.46276	3.38118	3.44912	3.28958	3.5104	3.52577	3.53656	3.35591	3.38925	3.39068	3.53604	3.40109	3.29848	3.44912	3.58342	3.53778	3.51749	3.39926	3.45251	3.33808	3.31606	3.43354	3.15858	3.61192	3.49339	3.67294	3.50667	3.95054	3.48179	3.49236	3.53896	3.6168
ANKRD40	7.3839	7.32194	7.36176	7.55676	7.77023	7.6536	7.44779	7.00899	7.19247	7.35295	7.02309	7.39968	7.45974	7.57688	7.65348	7.62464	7.51567	7.36214	7.54464	7.4357	7.63269	7.6619	7.10957	7.78751	7.04225	7.43804	7.61366	7.65501	7.45324	7.36558	7.2091	7.58922	8.00604	7.605	7.19934	7.25468	7.39271	6.83047	7.47314	7.21206	7.23933	7.76688	7.74958	7.30192	7.13258	7.45107	7.19899	6.84757	7.80318
ANKRD40CL	3.50536	3.60484	3.56833	3.60484	3.60484	3.54248	3.67441	3.60484	3.8224	3.85041	3.43435	3.54231	3.74195	3.54162	3.60434	3.6489	3.62229	3.49666	3.61217	3.62624	3.54164	3.44058	3.74429	3.66565	3.49702	3.57019	3.71104	3.62727	3.53417	3.58985	3.6038	3.50545	3.49678	3.62696	3.38519	3.41694	3.55902	3.4583	3.62829	3.52367	3.83736	3.70459	3.66593	3.58347	3.46518	3.57494	3.71583	3.65058	3.77565
ANKRD46	7.34793	7.97265	9.72084	9.60725	9.68666	8.75723	9.33292	9.65178	8.28365	7.17355	8.98898	9.21649	7.93677	8.31518	8.09937	10.3213	9.57348	9.65787	9.93388	9.83321	10.2608	9.07604	9.81403	9.91736	9.37999	9.6123	10.05	10.1134	9.14422	8.52901	9.62287	9.96861	10.8841	9.5896	9.26294	9.55359	10.214	10.2438	9.33685	8.80072	9.52766	9.63256	10.2046	10.1785	10.474	9.85816	9.75068	9.21766	8.95961
ANKRD49	8.10515	8.77029	8.94447	8.86373	8.617	8.06542	8.98856	8.60817	8.74169	8.5855	8.69155	8.67747	7.99731	8.74355	8.35616	9.63527	8.65677	8.72741	9.32905	8.91719	7.66077	9.08569	9.26952	8.73797	8.75617	8.67844	9.16563	8.6731	9.03321	8.84946	8.42266	9.22626	8.97313	8.76516	8.74833	8.91307	9.30084	8.14418	8.97056	9.19532	9.14457	8.85009	9.6421	8.94999	9.11617	8.56449	8.74469	8.71798	8.50049
ANKRD53	4.72872	4.74493	4.62521	4.85621	4.50691	5.09818	4.73061	4.77491	4.62671	4.72073	4.87412	4.4862	4.69742	4.63274	4.75507	4.46886	4.57161	4.56293	4.98244	4.54345	4.42055	4.43654	4.81303	4.77431	4.6881	4.69551	4.8943	4.69742	4.60009	4.84317	4.91249	4.71983	4.56038	4.744	4.60824	4.71423	4.6531	4.72825	4.45768	4.90446	5.13144	4.44808	4.8806	4.69742	4.85143	4.63091	4.79969	4.98041	4.54237
ANKRD55	4.24702	4.47561	4.23989	4.05127	4.00215	3.66062	4.05661	4.62509	4.13128	4.35689	3.91058	3.99086	4.46345	4.31471	4.58433	4.04194	4.05623	3.85298	4.04928	3.94789	3.96644	4.23318	3.94529	3.96018	3.91083	3.91593	4.19317	3.82554	4.18049	4.08197	3.97366	4.08993	3.81779	3.94206	3.77602	3.85167	3.71937	3.81805	3.98262	4.74639	4.28674	4.21779	5.51538	4.30957	4.57479	4.00923	4.11062	4.26903	4.12853
ANKRD6	8.06557	7.00057	8.52082	8.26485	9.18288	8.58001	9.37121	7.18818	8.84791	6.67979	9.04493	9.62091	7.69206	7.57512	8.14312	7.49628	8.27419	9.05029	8.35354	9.24196	9.25223	8.42415	9.94414	8.76103	10.3841	9.23871	9.11961	9.23821	8.61132	8.61154	7.09946	9.99964	8.39381	8.93767	9.00715	7.52729	8.73169	7.95849	8.90171	7.90454	9.0698	8.55206	8.80465	8.94609	6.06045	6.7818	9.54066	7.7222	8.22646
ANKRD7	3.65213	3.74822	3.79419	3.95215	3.84414	4.30255	4.23256	3.85633	3.83457	3.87057	3.85916	3.86055	3.91282	3.78575	3.86385	4.46005	4.21413	3.99033	4.09588	4.00653	4.98147	3.93121	3.95566	4.4032	4.28336	4.29331	3.66289	4.13146	3.8659	3.96664	4.00832	3.9201	4.93485	3.77659	4.04454	3.73121	3.71211	3.89537	3.92134	3.68607	4.43906	4.23382	4.26462	4.21109	4.67015	4.0808	4.10703	4.1385	4.56106
ANKS1A	8.76235	9.27841	9.42596	10.3828	9.687	9.5815	9.41962	9.58049	9.12452	8.63672	9.45719	9.32104	9.10762	8.99445	9.45635	8.58012	9.73428	9.27295	9.42238	9.55987	10.2555	9.2663	9.30152	10.1025	10.0376	9.69886	9.64984	9.72716	9.64352	9.3524	9.62371	9.66292	10.243	9.35977	9.68563	9.88505	10.5832	9.81502	9.62713	9.15074	9.54161	9.782	8.73464	9.09424	9.77349	9.29269	9.47309	9.23017	9.44217
ANKS1B	4.63215	4.40788	4.48833	4.18589	4.51752	4.36184	4.63627	4.64447	4.43502	4.54878	4.35363	4.3765	4.51752	4.46214	4.29429	4.40566	6.25709	4.47944	4.5903	4.3814	4.63828	4.36642	4.52753	4.68042	4.72858	4.617	4.54764	4.42419	4.24166	4.39923	4.48748	4.70896	4.65877	4.61025	4.52802	4.36587	4.39623	4.34267	4.51255	4.34278	4.97106	4.5192	4.92106	4.5078	5.00042	4.51752	4.4851	4.63206	4.69089
ANKZF1	7.70022	7.98304	8.03704	7.99704	8.52204	7.98538	8.58155	8.16367	8.062	7.98647	7.94986	8.29748	7.68293	7.76857	7.91774	8.2666	8.33202	8.15599	8.47574	8.31008	7.8184	8.08093	8.48911	8.62729	8.07263	8.55934	8.59804	8.25083	8.08239	7.95682	8.04615	8.23802	8.41782	8.09791	8.01011	8.06084	8.15224	7.94935	8.20448	8.29009	8.69124	8.2231	8.02759	8.40104	8.46317	7.87931	8.15971	8.21934	8.36884
ANO1	8.63606	6.10814	7.24876	7.7088	7.3457	7.76057	8.75254	4.75954	7.25169	6.09134	6.03701	5.52063	7.66927	6.80119	6.61096	6.72614	5.08703	5.47024	5.40666	4.69222	4.99381	8.91377	4.00033	3.90532	5.07106	5.3585	4.2504	5.28229	7.91193	7.4258	5.90679	4.17122	4.49696	4.45965	7.32536	4.25313	6.57058	7.53034	8.18092	7.76192	4.17974	5.27585	4.04659	5.87477	4.85516	7.3941	6.91985	5.59324	4.6126
ANO10	7.75701	7.82328	7.71924	8.04918	7.35772	7.88842	7.44968	8.46808	7.76591	7.82319	7.38996	7.44859	7.89929	7.80659	7.54049	7.43529	7.15207	7.1459	7.8998	7.61834	7.23771	7.74733	7.36517	7.7622	7.11179	7.99219	7.5621	7.66808	7.60509	7.70249	8.94504	7.36934	7.40104	7.21417	7.47776	7.47546	8.47749	7.80526	7.36694	7.6699	6.92323	7.42999	7.1743	7.0575	6.73444	8.14138	7.34348	7.55444	7.63388
ANO2	5.08508	5.29579	5.07535	4.86255	5.76832	4.73327	5.84309	4.95526	5.32132	5.31388	5.28729	5.80689	4.83828	4.89597	5.28098	6.3448	6.43983	6.15703	5.45506	6.29766	5.33384	4.98782	5.6254	6.02993	7.69296	5.48702	6.39252	5.38896	5.26826	5.29626	4.94553	5.83132	4.97124	6.82177	6.14058	7.06087	7.54311	5.6254	5.7879	5.38029	6.84509	6.07806	6.01121	5.99593	5.8681	5.82788	6.29387	5.91061	6.29062
ANO3	4.09491	4.52216	4.9491	5.26591	3.82372	4.59662	3.80018	4.39169	5.00476	4.00748	4.63839	3.89582	3.91282	4.68097	4.24841	3.86838	3.72725	3.91534	3.76464	3.4987	3.69661	5.48249	3.78145	3.66062	3.9927	3.81746	3.75731	3.85742	4.80247	5.26904	3.85549	3.77602	3.59171	3.57307	3.81887	3.30498	4.06048	3.70881	3.94909	4.37487	3.79509	3.89365	4.27612	3.90553	4.00312	3.85598	3.9613	3.88024	3.93189
ANOS1	9.22768	8.95773	8.38359	7.89309	7.33519	8.85213	7.43432	6.8495	8.80128	7.59792	8.58583	7.64896	10.1658	10.3975	8.503	9.86493	7.11807	6.97328	7.2717	8.42632	8.53297	8.73473	8.23008	8.23498	9.88678	7.47344	7.86081	6.75837	8.82824	8.09948	6.20491	5.57408	9.81563	9.18279	8.71568	7.06531	7.46269	8.74559	8.57894	8.81992	6.80279	9.19508	8.05031	6.67061	8.31609	9.02436	8.55538	8.31255	6.89691
ANP32A	10.2739	11.1568	11.6963	11.2405	12.1838	11.1482	12.6959	10.9758	10.7131	10.8739	11.5561	11.6065	10.7405	11.0374	10.7203	11.4604	12.3753	12.2459	10.9883	11.5663	11.8934	10.7652	11.5726	12.0729	12.1027	11.6629	11.9036	11.4979	11.15	10.7451	10.7677	12.0852	11.777	11.5105	11.3769	10.9369	10.9492	11.9277	11.2259	10.6737	11.8395	11.7988	11.6282	11.9079	11.6016	11.5941	11.6115	11.0007	11.9669
ANP32A-IT1	3.80697	4.16718	3.77437	3.8336	4.13792	3.8293	4.13733	3.90202	4.06381	4.15243	4.41174	4.52208	4.01326	5.04123	4.01445	4.66749	4.72257	5.26058	3.63596	3.59923	3.91003	4.07262	4.41073	4.43827	4.40435	4.23794	4.08833	3.79962	3.47833	3.74277	3.50008	4.33636	4.26614	4.26888	4.05348	3.88645	4.33473	4.28825	4.11625	4.23529	3.96211	4.07772	3.86248	3.886	3.62204	4.04699	4.27172	3.81187	5.98404
ANP32B	11.3089	11.5861	11.7495	11.782	12.4574	11.9193	12.3837	11.203	11.5217	11.4228	11.8176	11.9319	11.3162	11.5052	11.3688	11.7746	12.1289	12.2046	11.4012	12.0953	12.689	11.7712	12.0537	12.4257	11.6578	12.6481	12.356	12.1314	11.731	11.568	11.0962	12.1713	12.6564	11.7215	11.945	11.6029	11.8918	11.9566	11.8724	11.511	12.2646	11.9629	11.7645	12.0883	11.5797	12.1244	12.1882	11.5609	12.1149
ANP32C	3.86394	3.79812	3.79764	3.38693	3.7439	3.66185	3.9762	3.83257	3.61101	3.75201	3.71722	3.28866	3.80896	3.51188	3.63209	3.69284	3.89322	3.90905	3.87536	3.98104	3.89893	3.6918	3.87545	4.22263	3.98008	3.97219	4.35097	3.82295	3.84029	3.74886	3.97046	4.10616	3.97608	3.85494	3.81135	3.72973	3.79098	3.97949	3.68654	4.04511	4.15489	3.76562	3.81757	4.21381	4.32942	3.9845	3.98137	4.0731	4.04905
ANP32D	3.72391	3.58231	3.73971	3.58113	3.78103	3.49366	3.8781	3.94593	3.7053	3.84596	3.54552	3.60001	3.74532	3.74505	3.79014	3.58123	3.69294	3.65741	3.65686	3.58082	3.61799	3.72057	3.57251	3.70221	3.63648	3.65293	3.71961	3.52431	3.74082	3.61267	3.74829	3.66443	3.81106	3.65686	3.60903	3.53442	3.66089	3.65507	3.57423	3.68672	4.08366	3.45585	3.72596	3.56792	3.7046	3.66747	3.70514	3.77887	3.70086
ANP32E	10.0384	10.2668	10.5448	10.5553	12.1215	10.7214	11.34	10.1926	9.98142	9.93849	10.5771	10.7179	9.77212	9.92182	9.98935	10.7807	11.6099	11.7432	10.6022	10.6542	12.8887	10.4291	10.6111	12.1438	10.5538	11.6515	11.4385	10.8854	10.6733	10.211	10.2378	11.3686	12.2318	10.7964	10.8108	10.3295	10.5087	11.0262	10.586	10.0847	11.7619	10.9681	10.6128	12.2968	11.3872	11.1742	11.3455	9.48441	11.8208
ANPEP	8.71385	7.97328	5.54964	7.03294	5.31368	7.31733	5.00145	11.6906	7.98717	9.01737	5.25389	5.31013	7.43156	7.16966	7.38385	4.9545	4.6488	4.94272	9.8096	5.25238	5.58401	7.34451	5.22721	4.7923	5.06646	5.63064	5.18989	5.29942	5.99659	7.66415	11.6573	4.91477	5.22734	5.14447	5.08451	5.25661	5.42062	5.11153	7.56297	10.4077	5.31082	5.56008	5.46288	4.62109	5.42199	5.74166	5.38571	5.9124	6.98166
ANTXR1	7.94629	6.45905	6.32477	6.91981	6.09737	7.64335	6.19811	5.10552	7.33113	6.02498	6.51111	6.60336	8.11593	6.67571	6.29704	5.92214	6.43922	6.39058	5.87155	5.94981	5.97453	6.78022	5.91672	5.84025	6.0491	5.34092	5.48583	5.989	6.2793	6.58656	5.47546	6.16669	6.8323	6.16625	6.22718	8.15171	5.69081	6.30529	5.62452	5.42405	5.75262	5.9378	5.79722	5.83547	5.95216	6.83294	5.8831	5.69891	5.8666
ANXA1	13.0187	11.9976	10.7467	9.54277	8.2509	11.3364	7.4641	10.1542	12.0557	12.0955	10.7543	10.3599	12.0819	11.4942	12.0614	8.93771	6.55495	7.74275	8.78245	8.70679	8.60906	11.0236	7.3031	6.35048	9.64082	8.60198	7.11318	9.02566	11.0847	11.7337	9.12035	9.00369	6.90216	9.86836	10.9181	12.3593	10.3598	10.3749	10.6628	11.2156	5.1442	7.14667	7.77844	7.65268	7.25502	10.2853	7.81199	11.3356	9.49789
ANXA10	3.31045	3.46978	3.36529	3.37107	3.46932	3.39569	3.29845	3.7111	3.31903	3.47981	3.39977	3.39977	3.38095	3.55383	3.43011	3.49504	3.29581	3.54047	3.15	3.24983	3.20245	3.30689	3.22135	3.35285	3.34898	3.28517	3.37467	3.31887	3.18627	3.39977	3.27492	3.44837	3.17577	3.31615	3.17594	3.27136	3.35407	3.41993	3.19192	3.48977	3.69488	3.40062	3.52327	3.66219	3.78115	3.6795	3.38503	3.925	3.50478
ANXA11	10.9017	11.1856	10.0086	10.2117	9.46671	11.1202	9.55216	10.9915	10.9186	10.9534	10.1734	9.7992	11.2403	11.0808	10.7742	9.47359	9.02058	8.80073	10.6876	9.57818	9.28139	11.1054	8.97822	8.94784	9.85211	9.78895	9.43633	9.33707	10.9978	10.8344	11.5095	9.56766	9.58984	9.5294	10.1857	10.4417	10.3844	10.3382	10.777	10.9216	8.70952	9.57811	9.30751	7.97651	7.70659	9.97382	9.45724	10.5621	9.52383
ANXA13	5.58555	5.16638	5.00111	9.61718	5.07944	5.16277	5.68401	5.6148	5.45657	5.48405	4.91803	4.84285	5.55846	5.90841	5.33969	5.04276	4.87111	5.07926	5.14487	4.65336	5.59215	5.22854	4.97135	4.98838	5.05113	5.74461	5.19238	4.86383	6.0207	5.50101	6.38324	4.97288	5.19229	4.69387	5.35377	7.44643	6.48724	6.25106	5.46911	6.04653	5.23026	5.26995	4.94004	5.31076	5.33497	5.47963	5.00087	7.61848	5.24453
ANXA2	13.8298	13.6853	12.8501	12.5293	10.9661	13.4365	10.1693	12.6167	13.4939	13.5825	12.9422	12.4245	13.829	13.8235	13.5384	11.9508	8.95705	10.7442	11.6076	11.4618	11.2453	13.3655	10.7677	9.29886	12.609	11.8301	10.4831	11.5814	13.1215	13.7492	12.2307	11.7383	9.8584	12.2439	12.4606	13.9132	12.5441	13.4575	12.9705	12.8694	8.40112	10.5415	11.1981	10.2494	10.512	12.7749	10.0669	13.6551	11.8552
ANXA2P1	5.50819	5.40798	4.76701	4.38377	4.10412	4.97443	4.15686	4.64347	5.07729	5.12573	4.80153	4.32061	5.64099	5.30152	5.24743	4.67156	4.21798	4.1396	4.40366	4.40583	4.25102	5.11983	4.36428	4.49439	4.62827	4.44594	4.44006	4.51571	4.88	5.21299	4.72226	4.21434	4.28548	4.60856	4.57472	5.60636	4.60833	5.09956	4.92864	4.65476	3.98971	4.02308	4.66395	4.27623	4.28924	4.63908	4.20943	5.46492	4.44125
ANXA2P2	11.7244	11.6566	10.864	10.4441	9.31269	11.2403	8.9405	10.6148	11.4143	11.6605	10.9315	10.4022	11.6926	11.6697	11.3937	10.0405	8.42854	9.04333	9.68253	9.68645	9.50005	11.3416	9.25791	8.48851	10.6143	9.86693	8.94928	9.61929	11.1239	11.7628	10.3234	9.83171	8.57576	10.2905	10.4568	11.8338	10.5367	11.5108	10.9017	10.8254	9.4833	9.0648	9.60014	8.8707	9.55012	10.822	8.52749	11.7693	10.0175
ANXA2P3	6.78064	7.4325	6.87727	6.70441	6.29019	7.02943	5.91131	6.69488	7.24513	7.27157	6.43485	6.49858	7.52205	7.25742	7.49037	6.50635	6.25448	6.16834	6.55826	5.91473	6.47077	7.11048	6.42635	6.18153	6.97302	6.52466	6.6355	6.60285	7.28302	7.83782	6.77845	6.53904	5.40784	6.75491	6.64274	7.13431	6.92145	6.92566	7.23752	6.83317	6.42914	5.96325	6.32458	6.14559	6.17965	6.58206	5.80789	7.19136	6.59504
ANXA3	5.27753	6.04834	7.36739	8.07665	7.73343	7.08076	8.99225	7.79459	6.88762	5.17159	7.93043	8.87851	5.80567	5.03607	6.21526	9.34005	4.81626	9.19721	8.94851	7.25994	6.81556	8.88374	7.08691	7.80397	7.73956	7.27132	6.58807	8.94683	8.78156	10.0166	8.83739	9.27171	6.2292	8.59642	9.21812	10.7749	10.121	8.70201	7.10003	7.70921	6.6022	7.28315	6.76462	8.47013	8.36098	7.85048	7.45667	10.2372	5.70663
ANXA4	10.9526	10.9417	9.98409	11.6281	9.56167	11.2358	9.21932	11.8159	10.8681	10.9221	10.001	9.80862	11.0765	11.3751	10.5784	10.5022	9.95078	8.7448	10.501	9.43787	9.55608	11.5742	9.46282	8.26346	9.48241	9.45038	9.58681	9.27729	10.9957	10.6586	11.5192	9.50865	8.68884	9.85707	9.87898	10.6882	10.4455	9.84519	10.7175	10.5767	8.47713	9.46734	10.3165	9.25733	8.88288	9.91875	9.45454	10.4124	8.85238
ANXA5	13.0584	12.7456	12.3337	12.2433	11.2987	12.7643	10.5952	11.6712	12.6252	12.7065	12.1185	12.1947	12.783	12.4918	12.7862	10.5406	11.1549	10.9196	11.3012	11.2984	11.849	12.4437	10.9691	10.5447	11.9838	10.8882	11.0665	11.3405	12.3698	12.6063	11.6247	11.4206	10.9293	11.4875	12.007	12.0951	11.8561	11.7547	12.2579	11.9737	7.47914	11.2375	11.5294	10.6473	10.9562	12.6731	11.0289	11.8446	10.9329
ANXA6	9.18312	9.38038	9.04228	9.42772	8.88982	9.31683	8.30807	8.494	9.32433	9.27898	9.16581	8.33288	9.20731	8.91528	8.98311	7.53978	8.65289	8.52809	8.71064	9.10972	8.55452	8.94644	8.52078	8.48788	8.33496	8.24886	8.67497	9.31977	8.98735	9.30335	8.36185	9.04558	7.96735	8.54736	8.83642	8.51758	7.66775	8.74767	8.78303	8.42755	7.88449	8.20206	8.62163	8.72832	7.76721	9.062	8.47102	7.76692	7.8098
ANXA7	10.7931	10.7088	10.5085	10.2317	9.53548	10.7435	9.57165	10.8896	10.6297	10.2556	10.3829	10.0591	10.8585	10.7602	10.6247	10.5327	10.0592	9.48819	10.5972	9.86797	10.2775	10.777	9.58234	9.08849	10.2346	10.0926	9.72782	10.4852	10.7233	10.6516	10.929	10.0263	10.2426	9.98749	10.6002	10.8813	11.4128	10.7043	10.4711	10.8837	9.83244	10.1464	10.4864	9.78528	9.61171	10.5901	9.87696	11.1548	9.4107
ANXA9	5.84127	5.74063	5.48247	5.49366	5.7534	5.83933	5.76498	8.06086	5.76037	5.77237	5.3982	5.40454	5.92847	5.80029	5.77846	5.83833	5.63425	5.30678	6.3544	5.51006	5.20969	5.89982	5.82543	5.85804	5.83019	5.69296	5.83017	5.27329	5.61237	5.65272	7.70732	5.49042	5.73094	5.45219	5.49522	6.41972	7.16133	6.33605	5.37685	6.83368	6.0911	5.6253	5.82256	5.84769	5.98732	5.98892	5.49486	5.88072	5.75424
AOAH	8.64971	9.80237	7.57603	7.40263	6.90489	8.13498	6.03439	7.35241	9.24691	9.46044	7.42272	8.63927	9.3412	10.0253	9.55326	6.56632	6.0001	6.63796	7.12194	7.32841	6.76215	8.48842	6.98701	6.622	7.91537	6.89802	6.38862	7.07797	8.27292	8.70734	6.92911	6.63738	6.181	8.27842	7.55238	7.74467	7.67691	7.60591	8.40872	7.88509	6.61761	6.39419	6.34305	6.04285	6.18769	6.50734	5.89017	7.37612	6.83782
AOC1	4.99002	4.68595	4.86593	6.75716	4.76191	5.11645	5.17311	11.8581	5.20584	4.93908	4.84506	4.93363	4.92078	5.01278	4.98739	4.59585	4.76694	4.90372	9.88683	4.73728	5.04357	6.67681	4.70377	4.9559	4.84648	4.95556	4.88198	4.68347	6.4711	4.82986	11.0549	4.78793	4.74453	4.78262	4.70881	4.62722	4.9851	4.74863	8.27709	11.1706	4.8294	4.629	4.98043	4.74943	5.01492	5.04854	4.81273	5.85171	4.80885
AOC2	4.87187	4.84994	4.55625	4.69321	4.6012	4.70945	4.67301	4.52745	4.81744	4.72574	4.72391	4.69047	4.5777	4.58834	4.62779	4.61549	4.8554	4.61144	4.59871	4.72464	5.28106	4.73696	4.87904	4.48546	4.50156	5.26458	4.98047	4.48528	4.6506	4.7047	4.8726	4.7538	4.59094	4.62198	4.45125	4.68046	4.66639	4.465	4.7165	4.79428	5.09433	4.9993	5.02922	4.91376	4.56489	5.17446	4.77497	4.73142	5.05076
AOC3	9.73064	9.09254	7.78089	8.03282	6.79856	9.86042	5.76238	8.4423	10.7129	9.48095	9.41316	8.19852	9.18473	8.56066	8.93288	5.47799	5.66503	7.06533	7.15821	6.70152	6.92088	9.8666	6.08217	4.64837	7.1304	6.89778	6.47517	7.78497	9.19585	8.93741	8.98525	9.08796	6.16606	6.99639	8.04049	7.94641	6.85354	6.4944	7.71263	8.05704	5.28827	6.09801	6.6403	5.7889	5.32964	6.83739	6.62757	7.22639	5.86238
AOC4P	6.99409	6.7784	6.73399	6.56592	6.74564	6.64118	7.01242	7.0805	7.0312	6.86563	6.77704	6.86696	6.91987	6.70863	6.86099	6.8334	6.793	6.94013	7.11998	6.74563	6.72433	6.51541	6.88483	6.99269	6.78254	6.83062	7.04763	6.68121	6.65528	6.74205	7.13251	6.68987	6.8272	6.7859	6.62191	6.54344	6.66973	6.71821	6.48721	7.06152	7.11747	6.94411	7.14925	6.88118	7.38202	7.1524	7.09173	7.41752	6.95279
AOPEP	9.5358	8.68087	9.32235	9.42776	10.1767	9.14696	10.3896	9.74994	9.50541	9.56796	9.45578	10.4332	8.67054	8.99138	8.89963	10.6469	9.25308	10.0439	10.3986	9.13096	9.5943	10.0511	9.49664	10.1008	8.7578	9.58141	11.5606	10.6546	9.50815	10.2285	9.72129	11.3148	9.17118	10.027	9.96404	10.2453	10.9562	10.1036	9.83675	9.84778	9.53277	8.90458	10.0683	9.92826	10.7304	10.5415	8.56437	10.2684	10.3248
AOX1	8.61343	7.24452	6.06599	7.11603	5.03505	7.71134	5.79553	9.94125	8.57033	6.48672	7.61638	5.44644	6.6739	5.39887	7.60433	7.3892	4.71761	5.6798	7.40932	7.73533	5.79974	7.43622	4.8367	4.78163	6.05657	8.66756	5.58779	5.45076	6.55303	8.5155	9.58709	5.56469	5.4755	6.05907	7.50033	10.7742	7.49585	5.9398	6.57285	8.14369	6.9483	5.33948	6.15554	4.86401	6.41253	6.9536	5.09544	8.80846	5.51018
AP1AR	8.18283	8.42633	8.08019	8.15431	8.32844	7.44067	7.97624	8.76295	8.04737	8.21965	8.02121	8.10684	8.47211	8.49903	8.45441	8.76746	8.64125	8.02681	8.71377	8.50821	8.9689	8.59477	8.6667	9.20159	8.51371	7.78226	8.75655	8.61764	8.471	8.41599	8.97441	8.72785	9.20453	8.33081	8.3587	8.54135	9.04194	7.78974	9.17519	8.35204	8.01667	8.21758	8.08908	9.36762	9.3174	8.32916	7.91249	7.41679	8.33673
AP1B1	8.17114	8.53079	7.34569	7.393	7.36396	7.78488	7.67312	7.74857	8.18326	8.11239	7.54442	7.81828	8.80011	9.11616	8.64633	7.2645	7.38221	7.19256	7.49547	7.60781	7.43435	8.17797	7.62666	7.62132	7.92456	8.07351	7.64148	7.49739	7.92063	8.02805	7.79458	6.90551	7.07384	7.71344	7.54779	7.64431	7.6249	7.65588	8.3311	8.38272	7.67486	7.20937	7.324	7.27563	7.74839	7.77415	7.45169	7.99662	7.53468
AP1G1	7.65189	7.56328	7.78852	8.15867	7.30661	7.79492	8.41615	7.89449	7.43102	7.60901	7.58223	8.05847	7.44789	7.62972	7.87825	7.60083	8.75964	6.80755	7.90135	8.07397	7.86476	7.65276	8.0264	6.76523	7.93942	7.72085	7.34692	8.28777	7.56809	7.92503	8.46315	8.4788	7.39587	7.7308	7.63239	7.99411	7.79689	8.15855	7.83596	7.32827	7.16487	8.44138	7.7772	6.73579	8.2612	8.44052	7.77988	7.52847	7.00608
AP1G2	6.66694	7.27128	6.83352	7.4167	7.25567	6.88337	7.12312	7.21509	7.23173	6.85	6.95415	7.82737	6.9248	7.13315	7.1771	7.50803	7.47098	6.63412	7.75592	7.53404	6.6655	7.51427	8.22165	7.68811	6.96877	8.05549	7.15473	7.39154	7.44235	7.48626	7.51348	7.29988	7.10167	7.02262	6.86503	7.76828	7.51446	7.40832	7.17845	7.57257	7.91424	7.3609	7.01599	7.50358	7.746	7.53434	7.079	7.393	7.78674
AP1M2	6.2517	6.3166	6.01005	6.34146	6.03467	6.06538	6.32621	8.13889	6.08545	6.34953	6.02145	5.88538	6.22236	6.25559	6.10515	6.20242	5.93593	5.99071	7.0641	5.99913	6.09103	6.61986	5.83077	6.1548	6.60804	6.95339	6.17275	6.00806	6.22683	6.54367	8.1798	5.9532	6.17314	5.89599	6.23564	6.25324	6.25682	6.43506	5.76427	6.72133	5.88594	6.05696	5.65455	6.22977	6.70538	6.19557	6.59572	7.19832	6.34229
AP1S1	8.66973	8.61341	8.64506	8.27312	9.49162	8.9053	8.20476	8.93704	8.73346	8.49803	8.6912	8.44993	8.96508	8.73653	8.49526	8.90155	8.9626	9.20158	9.04902	9.09682	9.38574	8.6125	8.91949	9.20322	9.06787	8.97149	8.57774	8.89151	8.74936	9.00126	9.20386	9.19057	10.3559	9.75848	8.76144	8.44781	8.6883	9.09018	8.62878	8.7673	9.87782	9.26164	9.80359	9.28033	8.01174	8.65003	9.25027	8.80241	10.3561
AP1S2	10.0235	11.5022	9.59821	9.05504	10.0026	9.57883	9.04395	9.10302	10.404	10.7167	10.546	10.8924	10.8514	11.5295	10.7182	9.77776	10.647	10.2057	9.45817	10.4813	9.19932	10.4169	10.6248	8.39675	10.3241	9.5422	8.91867	9.32562	10.1538	10.046	8.35922	10.1245	9.61052	10.4056	9.64412	9.15885	9.21056	9.31241	10.5425	9.18909	8.60322	9.73505	9.76396	10.6216	7.64299	8.8755	10.6839	8.98665	9.19866
AP2A2	8.94125	9.74481	8.99739	8.83516	9.05905	9.12071	8.5578	9.14669	9.42282	9.37201	8.83786	8.67928	9.47373	9.77265	9.54823	8.09228	8.80769	8.38149	9.19299	8.75471	8.76192	9.19365	8.553	8.47436	8.80295	9.7329	9.16423	8.84609	9.2348	9.28919	9.3581	8.68606	8.721	8.6178	8.82868	8.80881	8.85828	8.70094	9.43018	9.43118	8.52762	8.75968	8.37378	8.79902	8.07821	9.0272	8.67978	8.66188	9.02368
AP2B1	8.80568	8.84368	8.90568	8.51311	9.00653	9.31324	8.5582	8.97756	8.8394	8.19793	8.69399	8.5286	8.97115	8.89259	8.69099	8.59457	8.78946	8.5885	9.43185	9.06264	9.50852	9.31061	9.01097	8.9131	9.02374	9.42176	9.18903	9.48153	9.2516	9.37023	9.6427	9.65162	8.6028	9.02134	9.43531	9.47906	9.27242	9.06936	9.37558	9.46068	9.82764	9.37258	8.75737	8.59688	8.39945	9.42892	9.18365	8.69217	8.14169
AP2M1	8.93303	8.82303	8.42225	8.42681	8.3589	8.47116	8.6082	8.35997	8.72318	9.03303	8.61209	8.40412	8.88324	8.87017	8.99161	8.41893	8.61297	8.47615	8.29044	8.5851	8.65203	8.24273	8.05049	8.80692	8.29273	8.71683	8.54682	8.69059	8.30606	8.87468	8.20853	8.85353	8.50473	8.2262	8.74919	8.83695	8.3962	8.73364	8.43283	7.91652	8.62677	8.51723	8.52857	8.01388	7.65946	8.94266	8.51903	8.62216	8.28531
AP2S1	9.98728	10.4606	9.34142	9.32582	9.80027	9.86601	8.78879	9.64645	10.2746	10.4973	9.75595	9.50199	10.3196	10.3968	10.1665	9.55882	9.63608	9.65808	9.26308	9.45656	9.40538	9.43525	9.17624	9.74593	9.59511	8.78802	9.79644	9.29127	9.37175	9.94709	9.2586	9.76059	9.58195	9.37749	9.295	9.17588	9.14759	9.72879	9.34762	9.50097	9.93514	9.24572	9.87282	9.51122	9.4988	10.2817	9.53336	9.42357	9.88873
AP3B1	9.12193	9.38727	9.05693	8.81435	9.38069	9.52433	9.19778	9.2839	9.24926	9.17094	8.88457	9.24492	9.56598	9.57882	9.30252	8.84311	9.4383	9.41695	8.7595	9.07547	9.33549	9.09634	8.94179	9.58324	8.77989	8.426	9.43686	9.33265	9.14674	9.12158	9.32328	9.61191	8.81963	8.84817	9.04853	9.07671	9.29241	9.29054	8.96883	8.92572	8.89519	8.86411	8.43928	9.41532	9.18597	9.4758	9.12283	8.95232	9.17512
AP3B2	5.56801	5.38686	5.43457	5.27242	5.62461	5.20923	5.76584	5.3475	5.59608	5.17367	5.3829	5.58044	5.32265	5.36782	5.05591	5.26717	5.51047	5.37859	5.36784	5.68487	5.35091	5.35289	5.75861	5.50574	5.90674	6.32004	6.09264	5.46726	5.37519	5.54063	5.703	5.71861	5.4897	7.59304	5.78061	5.40923	5.41201	5.68728	5.51036	5.22687	8.17101	5.66185	5.42095	5.2453	5.25436	5.54404	5.89393	5.79129	6.70819
AP3D1	9.2969	9.81789	9.69337	9.86328	9.71607	9.93352	10.3607	9.93992	9.66054	9.70075	9.86269	9.88737	9.53156	9.49382	9.63598	9.27689	9.92578	9.762	9.86322	9.91683	9.92316	9.55389	10.0019	9.77499	9.6474	10.0757	9.77293	10.1396	9.74368	9.88423	10.0603	9.87445	9.58908	9.72639	9.89291	9.78334	10.2588	10.1692	9.98548	9.70068	10.0338	9.87653	9.17375	9.42264	9.43655	10.2601	10.0501	9.93414	9.59486
AP3M2	7.35405	7.52186	8.6919	8.71881	8.74819	8.71125	8.53786	7.68704	8.425	8.04903	8.3724	8.89441	7.55001	7.90192	7.98103	8.50578	8.61578	8.37249	8.74381	8.60798	9.10468	8.42715	8.9249	8.87448	8.32428	8.76078	9.16296	8.9973	8.4053	8.16675	8.29672	8.67005	9.20744	8.78883	8.49958	8.69442	8.94435	9.26714	8.75311	7.8053	9.12292	8.61578	8.73509	8.69906	8.86486	8.48769	8.65998	7.96017	8.94042
AP3S1	11.7248	11.7061	11.4786	11.218	11.0255	11.4286	10.5399	10.759	11.7239	11.2289	11.4699	11.0073	11.5566	11.4008	11.2775	10.5848	10.3241	10.8844	10.7753	11.14	10.863	11.2505	11.0382	10.9053	10.9733	10.9567	11.1341	11.0457	11.3605	11.3487	10.2062	11.0619	10.7204	11.0525	10.7621	11.1774	11.1993	11.1898	10.9124	11.0111	10.7548	10.8104	11.1272	11.1713	10.7581	11.697	11.0229	10.6667	10.9349
AP4E1	4.15442	4.05394	4.11142	4.26166	4.14835	4.31818	4.1897	4.11185	3.97581	3.89763	4.15631	4.13418	4.46798	4.19873	4.39203	4.22507	4.32244	4.18399	4.02105	4.36896	4.3042	3.88346	4.18399	4.30898	4.18852	4.23669	4.43909	3.89279	3.89098	4.17902	3.90444	4.13257	4.30685	4.1459	4.21358	4.08624	4.09295	4.1689	4.2398	4.31463	4.2344	4.45885	3.9817	4.24362	4.34466	4.05106	4.16984	3.96868	4.01208
AP4M1	7.142	7.2197	7.63379	7.76892	8.38574	8.09615	7.49944	6.99329	7.4129	7.02242	7.74332	7.80374	7.32298	7.31152	7.10909	8.06065	7.81607	8.1982	7.83947	7.86935	7.63356	7.35578	7.88769	8.0522	7.73074	7.74594	7.76254	7.94789	7.59453	7.37759	6.92082	8.28584	8.75285	8.26712	7.41147	7.80619	7.49083	7.70465	7.5544	7.32412	8.06715	8.06032	8.16541	7.69493	7.90801	7.06961	7.94557	7.2137	8.35995
AP4S1	6.96528	6.7182	7.35236	7.1137	6.97538	6.71043	6.34809	6.3027	7.02424	6.63732	7.11436	7.32952	6.72953	6.91094	7.24577	8.0066	7.71396	7.01932	6.87919	7.32298	6.18911	7.16459	7.32751	6.33887	7.11629	6.45431	6.85727	7.38266	6.9784	6.79857	6.28459	7.25283	7.03061	7.02607	7.18228	7.1239	7.22649	6.72191	6.78321	6.43748	6.7087	7.67695	7.55602	6.89869	6.68292	6.70783	6.7635	7.1077	6.89349
AP5M1	9.41726	10.1554	9.98884	10.0401	9.86797	9.72258	9.37139	10.5103	10.0167	9.86455	9.91387	9.91068	10.1461	10.1147	10.1625	10.499	10.2233	9.85257	10.4604	10.1519	10.3448	10.196	10.0006	9.87387	10.528	10.2354	9.8804	9.97467	10.1708	10.0983	10.5979	9.94706	9.62828	10.2299	10.2513	10.1986	10.1064	9.51034	10.201	10.0871	9.8317	9.95575	10.1102	9.9385	9.98874	9.64533	9.9848	9.61122	9.32094
AP5S1	6.94227	7.53318	7.35236	7.31762	6.92606	7.41107	6.55085	7.14574	7.19588	6.89034	6.81926	6.80925	7.34416	7.04262	6.86066	6.31114	6.95339	6.83654	7.1954	6.97305	7.00493	7.07923	6.77292	6.83686	6.956	6.72578	7.23372	6.97158	6.98986	7.11113	6.98529	6.74824	6.97305	6.68738	7.00271	7.32309	7.50233	7.26576	6.98442	6.49887	6.54424	7.20833	6.77273	6.13229	6.68052	7.158	7.06279	7.15106	6.68189
APAF1	8.06078	8.63894	9.17674	9.0748	8.9274	9.35157	8.93932	6.76817	8.63787	8.736	8.69599	9.00024	8.42888	8.51181	8.80992	8.67389	8.55631	9.02134	8.16996	9.17668	9.18243	8.89642	8.89819	9.38108	8.92637	8.48217	8.55473	9.41902	8.78085	8.82404	7.29597	9.4409	8.89143	9.28416	8.42058	8.77933	9.16467	8.51935	8.90484	7.91364	8.31695	8.52955	8.57665	8.88615	8.24436	8.72846	8.86475	8.15193	8.32831
APBA1	5.10651	4.94206	4.8264	5.09729	5.00983	4.80208	5.02163	5.02015	5.07554	5.3693	4.85419	4.93627	5.01959	5.05209	4.97108	4.92982	4.94583	5.00734	4.99029	4.95807	4.96571	4.63296	5.18567	5.05965	4.97108	5.05522	5.06461	4.91783	4.88647	5.02917	5.07913	4.87881	4.98955	4.99606	4.94659	4.79083	4.87725	5.08904	4.74318	4.9564	4.96063	4.99707	4.70241	4.80535	5.04133	5.02412	4.93496	5.56094	5.2111
APBA2	7.52668	7.81617	7.80826	7.25358	8.59544	7.40244	8.64705	7.30086	7.76365	7.76026	7.6496	8.03615	7.51824	7.42253	7.51664	8.40587	8.48008	8.46766	8.10587	8.30796	8.28265	7.35436	8.55274	8.11901	8.13356	8.90784	8.76506	8.14449	7.3963	7.69107	7.1899	8.64329	8.18219	8.24329	8.23098	7.41631	8.42821	8.14364	8.15856	7.84801	8.59235	8.55492	8.55285	8.31863	8.45187	8.17477	8.61119	8.04792	8.95614
APBA3	7.84326	7.74958	7.65473	7.86414	7.49321	7.51921	7.45187	7.56438	7.72632	7.95698	7.73807	7.70854	8.02412	7.78555	7.85847	7.15457	7.58778	7.51595	7.87141	7.80715	7.23866	8.02124	7.6269	7.49561	7.58272	7.92234	7.66335	7.58225	7.83035	7.91639	7.56956	7.46592	7.39218	7.46107	7.55317	7.65559	7.69371	7.71183	7.69922	7.59727	7.37268	7.46629	7.34481	7.13333	7.3574	7.57666	7.74156	7.35439	7.47955
APBB1	6.3867	6.23062	6.06697	6.2114	6.62782	5.68943	6.39977	6.19289	6.21102	6.10073	6.08472	6.0234	6.09613	5.77286	5.94028	5.94458	6.32396	6.22909	6.57503	6.61324	6.46369	5.78283	6.63519	6.71134	5.97426	7.05169	6.83193	6.6394	6.16868	6.21826	6.41906	6.83705	6.40675	6.1256	6.46567	6.33914	6.34981	6.06658	6.33118	6.26409	6.60609	6.31085	6.23294	6.37186	6.29092	6.25657	6.38572	6.12227	6.03206
APBB1IP	6.47571	6.58461	6.22321	6.11227	6.15433	6.20939	6.25313	6.5187	6.62216	6.62923	6.21112	6.16883	6.97743	7.47288	6.54483	5.85799	6.12399	6.02782	6.32525	6.20803	5.91692	6.37467	6.20287	5.98395	6.08663	6.19366	5.99255	5.81912	6.24236	6.39896	6.55795	6.04667	6.03603	6.12516	5.97896	6.02278	6.01035	6.08861	6.17946	6.90649	6.45474	5.8903	6.1216	6.20803	5.97192	6.24533	6.07347	6.53246	6.18909
APBB2	9.46104	9.28287	10.9377	9.9246	9.13961	9.48155	10.3798	8.76971	9.58888	8.89838	10.0012	8.8321	8.94315	7.96157	9.65109	9.38457	8.13841	8.82317	8.63751	9.13968	9.41262	9.38588	8.29804	8.66555	9.25513	8.80212	9.64062	9.02776	9.55746	9.46784	8.75025	9.26418	9.47754	8.78316	9.26971	9.40692	9.89335	8.73823	8.84242	8.58191	8.71939	8.57176	8.03733	9.2385	9.19937	9.2795	8.47692	7.83489	8.18938
APC	8.51979	8.83729	9.05227	8.5827	8.76976	8.82693	8.71507	7.92731	8.52461	7.8279	8.67398	8.79395	8.8018	8.88999	8.68175	8.46133	9.10468	8.92452	8.88751	9.02602	8.81532	8.82195	8.86845	8.71249	8.9769	7.63419	8.8174	9.19791	8.84401	8.79154	8.3345	9.18751	8.3432	8.80661	8.91234	8.73343	9.27969	9.01769	8.98181	8.44774	8.47896	9.15729	8.35507	8.65046	8.2576	8.88348	8.79265	8.14041	8.01259
APC2	7.07341	6.9854	6.77207	6.65533	6.85494	6.76262	6.93368	7.25639	7.0195	7.27303	6.96728	6.9043	7.19659	7.15131	6.96654	6.98322	6.85688	6.99372	7.31196	7.01549	6.654	6.82929	6.95439	6.97337	7.01868	7.03552	7.39447	6.81372	6.98966	7.09829	7.26469	7.03126	7.14277	7.116	6.94712	6.87715	6.91967	7.07744	6.82183	7.1367	7.64145	6.68242	7.12128	6.85191	7.48444	6.88523	7.09531	7.26771	7.14794
APCS	5.92762	5.75821	5.59363	5.68986	5.79341	5.65116	5.90288	6.04675	5.70448	5.70899	5.64677	5.82098	5.78216	5.5978	5.69193	5.92983	5.7657	5.7017	5.71522	5.69733	5.56621	5.63761	5.88587	5.88685	5.73678	5.78216	6.01717	5.65869	5.58913	5.84532	6.11749	5.61471	5.72999	5.64162	5.65291	9.67343	5.71911	5.61857	5.62814	5.79774	5.88562	6.08012	6.06264	5.97298	6.29738	5.78237	5.83654	6.23305	5.97913
APEH	7.04031	7.75778	7.42378	7.62478	8.27521	7.71273	8.15005	8.61077	7.50903	7.6358	7.39898	7.8535	7.84692	7.86945	7.69845	8.31328	7.68602	7.89186	8.37365	8.31554	7.76948	7.64556	8.05739	8.47411	7.73837	8.88324	8.61172	8.54494	7.86009	8.1064	8.65015	8.54851	8.23797	7.70629	7.97333	8.35402	8.62319	8.04763	8.26115	8.05026	8.65322	7.92228	8.5213	7.65373	7.50717	8.14602	8.12092	7.86685	7.58966
APEX1	10.5767	10.934	11.3604	11.3932	12.3743	11.1848	11.9336	10.7992	10.9576	10.988	11.6295	11.916	10.8071	10.544	10.8453	12.3693	12.3548	12.3974	11.4935	12.177	12.064	11.0919	12.2361	12.12	11.7196	12.7051	12.5126	11.9226	11.4225	11.1709	10.5458	12.351	12.5513	11.6752	11.7861	11.1708	11.1711	11.7506	11.6808	10.9011	12.6186	11.9748	12.7627	12.1726	12.2126	11.4774	12.3713	11.063	12.2505
APEX2	7.11287	7.0712	6.76324	6.85381	7.12872	6.96688	7.22831	6.93435	7.04481	7.11615	6.84653	7.13412	7.388	7.37119	7.29362	6.70869	7.1009	6.97917	6.80492	6.90169	6.84337	6.74183	6.86797	6.96458	6.80816	7.31351	7.25391	6.8525	6.83412	6.98188	6.74241	7.10317	7.28997	6.79372	6.69084	6.91779	6.87483	6.69421	6.92609	6.75898	6.82393	6.6648	6.86291	6.79308	7.20004	6.94984	7.03699	6.82095	7.01764
APH1A	9.65043	9.87787	9.88802	9.62611	10.2299	9.7299	9.52736	9.60303	9.73308	9.93484	9.61751	9.35754	10.0201	10.1411	9.74249	9.48702	9.87308	9.95748	9.90732	10.0822	11.1442	9.75233	9.84366	10.3936	9.88347	10.1477	10.0484	9.98186	10.0168	9.912	9.72626	9.9872	10.2988	10.0509	9.99119	9.92962	10.5259	10.5309	10.2135	9.76244	9.74757	9.87975	10.0364	9.96681	9.27979	9.74416	9.6681	9.58749	9.70957
APH1B	7.67821	8.01167	6.56059	6.56993	6.90671	7.24379	6.33815	7.19998	7.96218	8.30052	6.82912	6.98023	8.45726	8.52309	8.47235	6.59603	6.53962	6.59415	6.50456	6.8896	6.07411	7.39105	6.43772	6.78381	7.11155	6.66181	7.00779	6.98702	7.06796	7.91737	6.91078	6.72131	6.42586	6.89201	6.76926	6.79381	6.66689	6.79717	7.13379	7.18944	5.93409	6.13308	6.85122	6.58962	6.89392	6.83442	6.48027	6.91328	6.97332
API5	9.14217	9.17797	9.73426	9.72226	9.31092	9.31935	9.86467	9.24217	9.1319	8.9585	9.4326	9.43091	9.24555	9.37647	9.29911	9.69621	9.51761	9.17903	9.55843	9.72111	9.73988	9.62751	9.90406	9.42848	9.50318	10.1023	9.22027	10.1978	9.62641	9.48193	9.6516	10.22	9.86967	9.50181	9.83778	9.85655	9.91452	9.55288	9.66553	9.76408	9.78053	9.60711	9.60437	9.94188	9.95852	9.23637	9.65526	9.83972	9.23096
APIP	9.32779	9.44021	9.1413	9.07518	9.5213	9.13888	9.46335	9.54308	9.63058	9.38371	9.3594	9.06858	9.8779	9.78612	9.5882	10.0056	9.48076	9.51211	9.93266	9.22597	9.60908	9.24511	9.51839	9.31419	9.26097	9.2133	9.59923	9.14714	9.17735	9.38709	9.69706	9.26899	9.47006	9.40765	9.03774	9.36633	9.54412	8.34608	9.59239	9.08383	8.98288	9.21417	9.79674	9.81427	9.54498	9.3488	9.20803	9.17587	9.54851
APLNR	7.09566	8.32568	6.30675	7.01869	5.36684	7.11132	5.71527	6.99081	8.53713	7.63192	7.98106	6.50404	8.68705	7.01969	8.29306	5.66773	5.58344	5.70974	6.5839	5.53594	7.09599	6.82358	5.7093	5.67931	6.32249	6.68119	5.62197	7.61312	7.1194	6.71574	7.4643	5.82268	6.03064	7.5196	7.57011	5.91377	6.71303	6.98757	6.74437	7.57814	5.85343	6.28443	6.46943	5.74068	5.92197	5.15916	7.47048	6.82367	6.36812
APLP1	5.8523	5.4254	5.75207	5.6503	5.65436	5.98309	6.36807	5.61182	5.63568	5.78076	5.91038	5.64802	5.72964	5.65984	5.61863	5.82013	6.28507	6.03896	5.3135	6.03361	6.36484	5.47424	5.9267	5.79057	5.96797	6.51384	6.06475	6.28137	5.54155	6.24906	5.71235	6.20677	6.20195	6.41399	5.81076	6.07701	6.50108	7.17807	5.50603	5.65959	6.66947	6.25459	6.1026	5.52318	6.01807	6.74712	6.15735	6.12622	5.97737
APLP2	10.7823	11.213	10.4835	10.9922	9.93147	10.1723	10.9146	11.4446	10.8618	11.2092	10.5182	10.3022	11.4656	11.4574	10.9698	10.0303	10.1281	9.86662	11.3653	11.0229	9.99869	11.2757	10.6629	9.53226	10.7046	10.9007	10.7626	11.1661	11.0564	11.0663	11.8703	11.0245	9.95523	10.4954	11.229	12.07	12.0488	11.6867	11.3011	11.389	10.3759	11.1571	10.4556	10.2185	10.6467	11.6415	10.8149	12.0146	10.3177
APMAP	9.82032	10.9335	10.2952	10.2036	10.1313	10.345	9.81407	9.96748	10.4338	10.5588	10.1976	10.3905	10.705	10.8162	10.5709	10.5588	10.1843	10.1779	10.3015	10.4831	10.8658	10.4687	10.6283	10.518	10.7708	10.3126	10.7723	10.9072	10.5866	11.0091	10.5283	10.5	10.6653	10.5487	10.6875	10.2997	10.4027	10.9136	10.8385	10.2225	10.3703	10.0634	10.4513	10.205	10.4385	10.7883	10.2509	9.95017	9.96568
APOA1	5.47442	5.45943	5.06682	5.69518	5.54773	5.22018	5.53149	5.88724	5.60027	5.84205	5.43167	5.31902	5.57901	5.24685	5.30212	5.90253	5.33949	5.45743	5.92134	5.32181	4.98915	5.27715	5.67296	5.17978	5.69962	5.62874	5.39616	5.33701	5.15382	5.60542	5.86998	5.47521	5.34872	5.11496	5.26763	5.30533	5.11837	5.47432	5.13579	5.20722	5.75094	5.26741	5.48832	5.17558	5.93131	5.40424	5.55587	5.33427	5.99562
APOA2	5.249	5.10183	4.92261	4.95656	4.97676	4.96941	5.16972	5.38812	5.027	5.14861	4.84229	4.96311	5.20984	4.99742	5.27995	4.98804	5.15694	5.06313	5.06108	5.03685	5.05374	5.06441	5.15545	5.09965	4.97228	5.15752	5.22816	5.05037	4.89411	5.11648	4.99272	4.93182	4.83198	4.87932	4.9014	4.77391	5.08235	4.89739	5.02618	5.35286	5.51428	5.12831	5.08917	5.11672	5.46622	5.26469	5.00732	5.43894	5.32054
APOA4	6.49784	6.47514	6.29823	6.02717	6.4555	6.36479	6.67198	6.47663	6.62423	6.71348	6.21379	6.0845	6.71314	6.48909	6.44262	6.65648	6.34117	6.77275	6.54936	6.55834	6.20087	6.30012	6.70598	6.71307	6.52516	6.46265	6.82432	6.4286	6.30513	6.36433	6.52009	6.59424	6.53434	6.49582	6.45731	6.4866	6.34021	6.45574	5.99731	6.62219	6.94993	6.19385	6.33621	6.68519	6.53262	6.26572	6.37679	6.38519	6.84047
APOB	4.82287	4.86297	4.69295	4.68875	4.684	4.80415	4.61508	5.32487	4.90812	5.10711	4.80131	4.82065	4.99981	4.65224	5.0267	4.56953	4.76721	4.65526	4.88651	5.43638	4.60526	4.66637	5.35899	4.65313	4.71808	4.76589	4.74825	4.35219	4.7391	4.79701	4.80948	4.51886	4.74869	4.57253	4.4967	4.49875	4.63086	4.70733	4.42848	4.77926	4.6848	4.58729	4.58679	4.5812	5.00912	4.23072	4.57606	4.80646	4.28981
APOBEC1	5.24214	5.15725	5.08593	4.97815	5.15009	5.12774	5.38641	5.28644	5.30424	5.38303	5.00466	4.9851	5.18097	5.29747	5.34978	5.06493	4.86906	5.18861	5.0523	5.07159	4.84696	5.08395	4.99648	4.82075	4.96795	5.06716	5.17958	4.99324	4.80025	4.94627	4.97478	4.91732	4.92867	4.8992	5.0825	4.99746	4.92258	4.87534	4.93595	4.84525	5.05097	5.13434	5.28144	5.02994	5.72512	5.1568	4.93732	5.43489	5.23541
APOBEC2	5.76672	6.52177	5.50055	6.51518	5.53739	6.92712	5.67693	5.70719	5.76336	6.3462	5.54662	5.5926	5.75463	5.78626	5.6767	5.59523	5.69554	5.48842	5.75427	5.6241	5.40055	5.28293	5.6333	5.85928	5.77441	5.72941	5.90639	5.60636	5.56476	5.58226	5.88518	5.62434	5.75588	5.6612	5.55721	5.54105	5.61324	5.53369	5.33339	5.84366	5.97304	5.72276	5.90679	5.40378	6.1138	6.02758	5.74341	6.12749	6.08505
APOBEC3B	6.94596	7.25778	6.15021	6.98044	9.34725	8.47849	8.60986	6.34107	5.7529	6.56472	6.24646	6.47581	5.53584	5.60873	6.03622	9.22107	8.43993	8.95132	7.48415	6.79555	7.51842	6.88519	6.3836	7.07356	6.87866	8.56308	7.61964	6.93089	7.10379	5.31605	6.69046	6.62019	6.28085	6.73059	7.29688	6.18855	6.53375	5.31121	7.59553	6.20668	8.73764	7.89804	8.20989	8.53812	7.44702	8.78312	8.41624	5.18767	8.25159
APOBEC3C	7.50307	7.45448	7.18578	7.11633	6.97895	7.34175	6.80202	6.93358	7.45464	7.45099	7.48423	7.22129	7.29127	7.65568	7.35335	6.86506	7.24747	7.57817	6.77474	6.97698	6.65738	7.10037	6.81734	6.97602	6.99081	7.47409	6.6503	6.56236	6.92057	7.10501	6.62344	6.96571	6.75571	7.06647	7.09901	8.12527	7.53719	7.30949	7.09561	7.17562	6.85381	6.90123	6.47524	7.26597	7.47102	7.2323	7.28064	8.35317	8.03538
APOBEC3F	6.10455	5.76189	6.27772	6.01174	6.28163	6.21779	6.17387	6.32737	6.37252	5.74569	6.10354	5.89125	6.19569	6.13655	6.02763	6.61455	6.5496	6.31232	6.92045	6.35553	5.85909	6.48301	6.20986	6.43279	6.11428	6.17729	6.63808	6.04216	6.15185	6.11344	6.40043	6.23364	6.11833	6.08174	6.20308	6.54312	6.50683	5.99469	6.26846	6.57059	6.59514	6.2162	6.91135	6.49948	6.47871	6.51619	6.43687	6.35823	6.29383
APOBEC3G	9.57174	9.70414	9.04212	8.07693	10.017	8.86135	6.76931	8.30515	9.30656	8.74621	8.70953	8.82572	9.60678	10.2636	9.60077	8.80171	9.04279	8.15974	9.15878	8.37517	7.9705	9.61907	7.66496	8.62102	8.49954	8.9426	9.88663	7.27514	9.13767	9.17634	7.27023	7.40614	5.01602	8.71595	8.82011	10.0244	8.80795	7.87507	10.169	10.1594	7.90216	8.94976	10.2622	8.63623	8.58581	8.89361	8.23678	8.73126	10.6183
APOBR	6.32456	6.63713	6.03418	5.64539	5.5165	5.99426	5.7721	5.85677	6.59713	7.03355	5.86048	6.07276	6.95366	7.11262	6.92896	5.52495	5.64601	5.92465	5.79692	5.72687	5.7382	6.52862	5.69586	5.6038	6.01778	5.77177	5.56773	5.85507	6.16999	6.26854	5.8975	5.58426	5.74591	5.96967	6.0121	5.83737	5.95026	5.82723	6.28749	6.15047	5.81305	5.45337	5.68622	5.59826	5.48536	5.25391	5.678	6.13028	5.98118
APOC1	12.6326	13.3	11.5328	11.0465	8.92889	10.4222	8.05337	10.1345	13.2681	13.2775	12.6707	13.1719	13.9198	14.0892	13.7378	9.72921	7.17907	8.87678	9.35503	11.5797	8.57819	13.4519	10.9452	8.65487	13.2529	11.2526	9.1761	9.38034	13.0387	10.9325	7.30889	8.24793	8.51374	12.9428	11.4591	7.39436	8.26359	11.2635	13.4891	13.5096	8.2704	9.56268	9.40061	9.3911	9.47067	10.0545	8.49253	10.3945	12.1908
APOC3	5.48437	5.21746	5.29634	5.2214	5.37815	5.26124	5.22408	6.52555	5.46078	5.52295	5.28897	5.23898	5.55846	5.60891	5.52811	5.51856	5.33751	5.28003	6.22595	5.16677	5.31314	5.60291	5.36248	5.18111	5.09555	5.30924	5.60935	5.28587	5.23712	5.42503	6.01905	5.4493	5.24889	5.21399	5.29842	5.13847	5.1543	5.1109	5.0817	6.14639	5.08657	5.30491	5.62772	5.51369	5.41168	5.38571	5.39106	5.46764	5.24771
APOD	6.60083	7.25578	6.60901	6.08095	6.23949	6.92296	5.13283	6.20675	7.10916	5.89238	7.85776	5.3289	6.20675	5.5445	6.36695	5.25966	5.17438	6.38702	5.87356	7.37011	5.68557	6.99173	5.5144	5.47125	6.75426	5.92566	6.02864	7.00617	6.95641	6.15373	6.6239	6.81135	5.55046	5.90718	7.38737	6.1073	5.75492	5.55081	6.34808	6.57344	6.05433	5.72999	6.97298	5.32218	5.31608	6.12427	6.46046	6.06055	5.24803
APOE	12.3755	13.0463	10.8841	10.7257	8.51599	10.7364	8.08346	12.0694	12.2771	12.5519	11.7841	12.3098	13.4101	13.646	13.6126	8.21882	6.89053	9.07261	9.92431	11.2295	9.45309	12.364	9.54298	8.00059	12.252	8.74696	8.54619	9.22375	11.9266	11.2651	11.0498	8.1581	7.64131	11.5866	10.8398	7.87303	8.43134	10.8514	12.4203	12.7655	7.99166	8.17732	7.83599	8.06266	7.43007	10.0516	8.16956	10.1893	11.6686
APOF	4.34228	4.53143	4.43933	4.37893	4.50986	4.46049	4.41128	4.66296	4.43062	4.61181	4.35155	4.28717	4.22536	4.30055	4.52534	4.37202	4.52067	4.62389	4.35536	4.63845	4.46526	4.47156	4.61582	4.37496	4.36429	4.35256	4.48114	4.45358	4.37239	4.43062	4.50421	4.32582	4.31378	4.34133	4.31	4.24254	4.41591	4.34263	4.28967	4.32509	4.23906	4.55073	4.45121	4.2738	4.64373	4.29708	4.4007	4.88239	4.57285
APOH	4.74248	4.99131	4.98214	4.7329	4.71344	4.73115	4.70655	7.24745	4.74031	4.85507	4.81022	4.57202	4.96247	5.01112	4.76848	4.73411	4.6329	4.80801	5.69188	4.4725	4.55132	4.65609	4.5944	4.58331	4.46038	4.63799	4.70412	4.55826	4.60526	4.69126	6.20583	4.52197	4.61181	4.51893	4.63524	4.68361	4.57278	4.50835	4.79069	8.15869	4.95069	4.81846	5.1404	4.65072	4.98302	4.80106	4.72549	4.85842	5.01389
APOL1	9.0179	7.72725	7.26082	7.41975	6.53215	7.76876	6.41196	7.59586	8.06755	7.1049	7.49808	7.39146	8.19922	7.94771	7.74016	6.34315	6.49047	6.46247	7.36052	7.55873	6.67647	8.17702	6.7508	6.38036	7.40985	7.03277	6.94035	7.35102	7.92724	7.73363	7.5031	6.71598	6.49929	6.80036	8.01771	8.92436	8.3226	7.2358	7.92251	8.18202	6.79165	6.94087	6.58054	6.66471	6.47914	7.33247	7.05348	8.39225	6.75067
APOL2	8.04271	8.24761	7.94585	7.85645	7.27869	8.01932	7.03825	7.9786	8.27636	7.89212	7.6849	7.79333	8.23953	8.34884	8.10953	7.35586	7.39725	7.31966	7.85704	7.78719	7.32899	7.97288	7.50865	7.00083	7.47335	7.53761	7.49533	7.57346	7.81763	7.946	8.10241	7.32873	6.81406	7.36735	7.69314	8.2966	7.80727	7.37206	7.82321	8.13219	7.40435	7.69365	7.69514	7.11719	7.19998	8.24505	7.63991	7.99068	7.17214
APOL3	7.10948	7.58434	7.52103	6.66453	5.63785	7.64116	5.65821	7.52763	8.26486	6.7993	6.71034	7.26152	7.00151	7.68395	7.53705	5.47703	5.62033	5.94029	6.97068	6.73568	5.69383	8.25314	5.91199	5.84849	6.04136	6.14965	5.82057	6.61456	8.38066	7.74694	7.5465	5.83991	5.77204	6.38348	6.97211	7.95232	7.39493	6.18212	7.45596	7.48941	5.77834	5.84451	6.10214	6.00366	6.16836	6.43157	6.32423	6.94154	5.71005
APOL5	5.63516	5.47636	5.35886	5.08453	5.38111	4.9895	5.339	5.35659	5.58706	5.53818	5.36092	5.26192	5.56515	5.51321	5.24926	5.25559	5.44491	5.47471	5.05885	5.2579	5.26317	5.18761	5.21875	5.57534	5.26198	5.35659	5.8678	5.07033	5.12018	5.40056	5.61157	5.18763	5.28685	5.08318	5.11877	5.15531	5.13577	5.32055	5.02618	5.42248	5.68622	5.28725	5.69426	5.25306	5.81915	5.35659	5.56995	5.97251	5.5949
APOL6	7.15167	7.22748	6.45746	6.22241	5.99979	7.17122	5.68739	7.06113	7.28247	7.01279	6.61224	6.44259	7.33597	7.54299	7.11596	6.02847	6.07337	5.85233	6.30732	6.90649	5.51882	6.87168	5.82476	5.69834	6.06996	6.03463	5.56335	5.75633	6.82591	7.01776	6.70462	5.7477	5.15192	5.8049	6.35102	7.54359	6.7719	6.32409	6.5949	6.96936	5.93826	6.16492	5.81511	5.66556	6.55924	6.4774	6.13872	7.85107	6.48757
APOLD1	10.7738	9.32813	6.88698	7.45356	7.79823	9.05824	7.90131	9.3302	10.3657	8.13241	7.16948	7.78466	9.86923	6.73769	10.9985	7.65901	8.55342	7.35039	9.79801	8.08266	9.44206	8.43477	7.27279	8.66574	7.86725	8.21066	8.46209	9.36313	9.47132	8.7241	9.86243	6.90308	7.92367	7.82545	9.29099	8.64348	8.27866	7.7467	8.38645	7.5682	9.26711	7.70151	8.40097	8.76208	7.59551	7.81952	7.89002	8.86997	7.53133
APOM	5.99918	5.77201	5.73851	7.08319	6.6168	5.83927	6.15319	12.1451	6.04998	6.076	5.68521	5.85732	5.8945	5.97692	6.07816	6.79575	6.12483	6.12824	10.1405	6.13725	5.85317	5.45761	5.90613	6.5156	6.6606	6.0279	6.20459	5.97957	5.84422	5.9769	10.7985	6.26936	5.9136	5.76323	6.24965	5.85319	5.88684	5.74336	7.43231	10.739	7.09145	5.75365	7.3368	6.63713	6.98326	6.12278	6.12536	6.05376	6.27871
APOO	8.09207	8.38491	7.8008	8.11835	9.75633	8.17658	9.32726	9.38373	8.14257	8.21354	8.36108	8.58468	8.46016	8.8393	8.19419	10.6829	9.97299	9.15257	9.00495	8.78284	9.14092	7.93994	8.83891	9.6586	8.66127	9.01158	9.60312	9.10184	8.11692	7.91395	9.76932	9.03713	9.9026	8.99736	8.40975	8.46307	8.78896	8.14297	8.62859	8.26773	9.4673	8.6367	9.68428	9.39897	9.26587	8.57799	8.80545	8.5385	9.12542
APOOL	8.80847	8.55921	9.23774	9.52316	8.76888	9.13109	9.72832	9.769	8.78981	8.6205	8.79883	8.91454	8.94345	8.92154	8.45033	9.08824	9.53631	8.58409	9.44195	9.07219	9.31904	9.03705	8.68359	8.77786	8.94404	8.88089	8.56892	8.91184	8.9849	8.46416	9.64364	8.97402	9.30325	8.81079	9.08402	9.31888	9.29225	8.74126	8.99668	9.06358	9.19477	10.159	8.86552	8.84644	8.42508	9.4816	9.08314	9.05422	8.59658
APP	12.1838	12.4611	13.2216	11.3607	12.2669	12.125	11.66	12.5635	12.1116	11.8776	12.3457	11.7415	12.2363	11.6946	11.7836	12.4636	12.3411	12.3207	12.4386	12.1624	12.786	12.6308	12.1551	11.2753	12.8985	12.4846	12.1194	12.7074	12.7361	12.0553	13.1644	12.5763	12.8247	12.0756	12.4049	13.6663	12.8753	12.8679	12.6824	12.7567	11.9096	13.0009	12.3491	11.6917	11.9977	12.9458	12.5082	13.0624	11.5684
APPBP2	8.33858	9.33128	9.90461	9.80245	9.60798	10.1332	9.70145	9.41022	8.84985	8.31599	9.75936	9.55209	8.70587	8.64419	8.82844	9.48202	9.94543	9.6692	9.6592	10.112	9.87999	9.46104	9.92887	9.42761	9.73457	9.25602	9.54125	10.2614	9.43216	9.17444	9.1696	9.47131	8.9225	9.67663	9.9403	9.77905	10.522	9.76596	9.7986	9.30797	9.76562	10.0461	9.76987	9.72107	8.75884	9.89861	9.81594	10.04	8.99559
APPL1	8.75469	9.11972	9.7695	9.07998	8.98088	9.07713	8.78619	8.87708	8.60382	9.00502	9.27611	8.95416	9.37774	9.29383	8.9714	9.07713	9.36468	8.88207	9.09924	9.1309	9.51214	9.26506	8.86315	9.41279	9.1075	8.66642	9.18504	9.08306	9.48503	8.86467	8.46315	9.07516	8.99511	8.94797	9.29542	9.15377	9.53088	9.53704	9.58426	9.10416	9.00564	9.53892	8.9678	8.95892	7.26275	9.19695	9.30158	8.65693	8.61232
APPL2	7.25984	7.84191	7.5196	7.45562	7.55988	7.69063	7.83011	7.02286	7.43758	6.92914	7.30438	7.98721	7.1794	7.41446	8.01909	8.35933	8.02111	8.08258	6.98787	7.92834	7.3294	7.49425	7.52475	8.35494	7.45798	6.15996	6.91232	7.80872	7.50674	7.61724	6.41014	7.88884	7.20851	7.96716	7.37813	6.84042	7.32972	6.64237	7.51802	7.46228	7.67205	7.465	8.05172	7.42932	8.39043	7.30377	7.31395	6.77351	8.17209
APRT	8.92983	9.16297	8.58647	8.42941	8.30526	8.71637	9.2638	8.98872	9.1216	9.0919	8.70131	8.82872	9.18788	9.14878	9.14228	9.44001	8.96478	8.19106	9.31313	9.14105	8.6621	8.88848	9.06078	8.27421	8.86222	9.1712	8.38357	8.76307	9.12715	9.1969	8.9982	9.4181	8.95477	8.74248	8.93285	8.76041	8.30111	9.18173	9.00165	9.03276	9.5549	8.9372	9.22429	7.78066	8.72086	8.83514	9.04243	8.67522	8.22453
APTX	7.5316	7.67152	7.82698	8.26533	8.24104	8.40842	7.84465	7.96594	7.75668	7.50884	7.97474	8.15548	7.65705	7.71161	7.58998	8.3936	8.90736	8.10485	8.45775	8.70294	9.24404	8.18567	8.63265	8.91177	8.51487	8.80943	8.71018	8.54421	8.18029	8.16759	8.56258	8.86458	8.69695	8.50029	8.28972	8.11452	7.91409	7.92483	8.33703	7.81524	8.27741	7.93786	8.86293	8.5546	8.66261	8.22355	8.17212	7.73944	7.79492
AQP1	9.1375	9.41167	7.18629	8.15989	5.53136	9.02813	5.99088	12.3232	9.04573	6.37682	8.20895	7.3088	9.20266	8.08985	8.47827	6.16507	5.8922	6.02634	10.492	6.00769	5.86928	8.00796	5.63511	5.51276	7.3088	6.27332	5.10106	8.8189	8.29982	7.83879	11.6711	5.4417	6.4149	7.70826	8.75534	9.3019	7.99888	7.29228	9.00984	11.0738	6.00271	6.45831	5.72489	6.03373	6.38974	6.19139	7.7202	7.62778	5.43775
AQP2	6.79882	6.53168	6.49481	6.46783	6.48043	6.3699	6.41856	7.42493	6.59949	6.70522	6.38181	6.41643	6.62369	6.70601	6.38915	6.55483	6.26804	6.349	6.89559	6.27431	6.18712	6.32308	6.4894	6.12932	6.55573	6.4966	6.71294	6.59133	6.47469	6.63898	8.7649	6.32944	6.28474	6.36465	6.34055	6.24932	6.47068	6.54455	6.21028	7.14761	6.66711	6.94528	6.52525	6.57242	6.94473	6.77538	6.26882	7.01452	6.58787
AQP3	8.40243	8.0334	7.86434	7.2773	7.58296	9.19124	8.35547	11.6601	7.61367	7.44226	7.90465	7.97997	8.28893	7.54799	8.2272	7.29805	7.16091	8.07633	11.3673	9.64407	7.04831	9.78438	9.07806	6.79512	8.24974	8.53142	7.90701	10.9204	9.79828	8.91926	13.2036	9.18212	6.31797	8.72225	8.99209	9.99789	7.76611	8.67138	9.16498	9.70679	7.95473	8.56838	8.99345	6.62092	5.84768	8.76666	8.57931	9.4165	7.02901
AQP4	4.44076	4.11663	4.36954	4.35485	4.2876	4.17199	4.3978	4.11745	4.21738	4.12197	4.21468	4.36294	4.18829	4.22344	4.327	4.46634	4.42055	4.55481	4.2056	4.49719	4.85205	4.10756	4.53	4.69739	5.81353	5.26043	4.44795	4.73906	4.39868	4.12572	4.33086	5.43661	4.42055	4.88179	4.5468	4.45784	4.35169	4.7654	4.4976	3.71421	4.09374	5.31444	4.65841	4.15605	4.46155	4.33286	4.2546	4.58151	4.24232
AQP5	5.58516	5.57323	5.17638	5.3786	5.30714	5.50087	5.41084	5.49557	5.74212	5.65361	5.37905	5.33262	5.64862	5.49697	5.51995	5.37299	5.11878	5.49513	5.3786	5.50252	5.16607	5.1693	5.54433	5.36623	5.18835	5.23499	5.50463	5.38523	5.3771	5.49615	5.3771	5.29993	5.27675	5.01071	5.28709	5.25884	5.08523	5.42248	5.01998	5.17312	5.70419	5.24973	5.51978	5.3455	5.26324	5.2016	5.52701	5.62275	5.3771
AQP6	6.50414	6.22239	6.39454	7.1083	6.09582	6.03438	6.14137	7.30803	6.32967	6.67757	6.24819	6.16018	6.34991	6.2162	6.26999	5.94414	5.93246	6.13358	7.46994	6.16818	6.07099	5.85645	6.21186	6.07869	6.29765	6.4612	6.52073	6.21186	6.7895	6.2081	8.98378	6.32188	6.18823	6.22665	6.34432	6.13135	6.09402	6.32484	6.34699	6.64937	6.17582	6.28441	6.51032	6.39981	6.51232	6.57268	6.58436	6.87227	6.43424
AQP8	5.90814	6.11434	5.72651	5.79831	5.93792	5.52925	5.81604	5.89864	5.95583	6.17532	5.87136	5.92535	5.96415	6.04003	5.86078	5.90814	5.94947	5.91769	5.90638	5.67843	5.67743	5.70997	5.91935	5.94608	5.8349	5.92438	6.13183	5.8943	5.63736	5.85548	5.77109	6.03414	5.90814	5.8024	5.64597	5.64243	5.75719	5.84706	5.52925	5.66151	6.10708	5.83526	6.11854	5.9943	6.00925	6.04499	5.66414	6.12809	5.99841
AQP9	9.64581	9.41742	5.73851	6.10838	6.20088	6.77099	5.89504	7.36409	9.99382	11.1198	6.36239	6.52357	10.3419	10.6266	9.68612	5.71075	5.86418	5.93305	6.09929	5.85962	5.94769	7.27851	5.92955	6.13016	6.81014	6.3656	6.33345	5.88122	7.4483	8.6801	6.53204	6.00162	5.90603	6.32249	6.27946	6.42704	5.82772	5.7956	8.11103	6.79127	6.00768	6.28213	5.99948	6.61991	6.88546	6.91271	6.19379	6.99876	9.71488
AQR	8.43068	8.61233	8.60284	8.63689	9.07423	8.60648	9.29682	8.11327	8.45354	8.87378	8.65056	8.76366	8.61628	8.61792	8.76377	8.19667	8.96136	8.97718	8.24252	8.69288	8.71821	8.50124	8.69093	8.9323	9.14361	9.289	8.9827	8.7961	8.44752	8.52289	8.35059	9.11368	8.9659	8.49758	8.50338	8.51828	8.6642	8.73632	8.58732	8.11712	8.61805	8.65261	8.06128	9.01261	9.02922	8.33165	8.69445	8.14461	8.54341
AR	6.21432	6.24023	6.81812	6.64645	6.03953	5.93974	5.92983	6.35148	5.89767	5.86338	6.0954	6.07436	6.16635	5.89714	5.88045	5.8867	6.1363	6.00277	6.32326	6.14878	6.23532	6.17647	5.68881	5.98395	6.2048	5.94424	6.09555	6.04634	6.29192	5.97706	6.39978	6.0507	5.72628	5.73127	6.62371	8.2211	8.66146	7.47812	5.94028	6.60432	6.22064	6.04369	6.43934	6.05167	6.24891	5.93249	5.6584	7.78777	5.84325
ARAF	7.76129	7.6408	7.26651	7.47751	7.78441	7.5325	7.48399	7.77788	7.73986	7.56732	7.26413	7.50845	7.66066	7.69204	7.68943	7.45779	7.41161	7.32254	8.03078	7.84219	7.30654	7.52219	7.67986	7.44005	7.36453	8.23292	7.73935	8.01947	7.76683	7.82365	8.09412	7.85012	7.53371	7.47142	7.69601	7.82263	8.10571	7.32991	8.00342	7.85347	7.96831	7.58654	7.29227	7.67941	7.646	7.73316	7.87245	7.64681	7.20533
ARAP1	7.91676	8.78002	7.9091	8.2744	7.84744	8.01469	7.65962	7.51363	8.47794	8.83816	7.94477	7.93546	8.80767	8.99881	8.59114	7.47664	7.74078	7.37682	8.09874	8.30996	7.12861	8.78288	8.00213	7.97876	8.3134	8.13276	7.9847	8.10608	8.4802	8.55968	7.93302	8.09919	7.47281	8.09987	8.21186	9.03029	8.79999	8.21052	8.91254	8.8088	8.08969	8.12965	7.72046	7.41426	7.08426	8.3456	8.06591	8.69338	8.03862
ARAP3	7.38163	7.73866	8.23697	8.3758	7.52377	7.63797	6.76936	7.53981	8.36003	7.53063	8.06682	7.86561	7.75922	7.64265	7.99811	6.86805	6.74214	7.59718	7.86231	7.51848	7.9418	8.06501	7.23435	6.99361	7.18773	7.29203	7.45441	7.47022	8.47776	8.32823	7.76115	7.55222	7.66355	8.09303	7.82209	6.99181	7.15051	7.05535	7.81668	7.9307	7.70607	7.66603	7.62435	7.13171	7.17751	8.19909	7.55643	7.34928	7.14325
ARC	6.90286	5.55855	5.20927	5.0708	5.15365	5.14949	5.52914	5.46764	5.76327	5.83245	5.06421	5.09538	5.95383	5.63185	6.68382	5.2741	5.2863	5.16317	5.86119	6.14358	5.37041	5.05902	5.34509	5.1822	5.79129	5.54023	5.52512	5.28606	5.51339	5.7448	7.05545	5.05598	5.36131	6.03367	5.40867	5.31874	5.20111	5.61872	5.58067	5.26549	5.88049	6.03431	5.25667	5.35989	5.48286	5.65144	5.51192	5.43615	5.91438
ARCN1	10.0709	9.88625	9.90666	9.88042	9.58779	9.56749	9.93329	9.47163	9.75146	9.85379	9.57493	9.3362	9.73983	9.60047	9.95348	9.29671	8.78353	9.5988	9.28759	9.64125	8.71406	9.52596	9.35126	9.47981	9.44844	9.49291	9.55654	10.0082	9.57925	10.0429	9.6186	9.81011	9.66086	9.25745	9.6854	9.86574	9.77522	9.50819	9.74488	9.14678	9.28388	9.62978	8.88311	9.5036	9.17149	10.5662	9.60869	9.85809	8.90039
AREG	10.8705	5.67938	4.35318	4.25227	4.03302	4.86952	4.33717	4.96042	7.95829	6.21548	4.05765	4.30631	9.04359	4.28928	10.7213	4.38194	4.44471	3.98412	4.9087	4.12629	4.18605	5.5246	4.1801	4.21789	4.06661	4.27249	4.49056	5.57239	6.23242	6.73705	6.61948	3.79081	4.15602	4.41203	5.14892	5.41607	4.30151	4.0002	4.54825	4.60755	4.38975	4.28259	4.5627	4.77822	4.50263	4.83818	4.27506	4.34399	5.91689
AREL1	7.61464	8.01844	7.58244	7.78988	8.92668	7.92297	7.68259	7.70452	7.77078	7.94825	7.89267	8.00201	7.81996	8.06522	8.03199	7.81363	8.55896	8.6401	8.58175	8.5372	8.43585	8.07162	8.54896	8.88494	8.61852	8.99073	8.76065	8.85669	8.07381	8.42761	8.32078	8.60438	7.772	8.26091	8.32078	8.38681	8.34661	7.67539	8.557	7.93069	9.06785	8.63672	7.97054	9.05346	8.2866	8.30545	8.65051	7.3526	7.87767
ARF3	9.6925	9.65437	8.90887	9.01262	10.3461	9.81832	9.56372	9.68735	9.60366	10.1657	8.76439	9.1278	9.95297	9.73033	9.48217	9.33265	9.79797	9.90633	9.64838	9.12492	9.11636	9.30557	8.93625	10.5168	9.47241	10.0659	10.2719	9.20622	9.28366	9.69351	9.61117	9.38853	9.80283	9.54406	9.05345	9.41185	9.11434	9.35841	9.21062	9.67204	9.53917	9.84801	9.65456	9.56779	9.71893	10.194	9.55869	9.34325	9.76047
ARF4	12.9197	12.468	12.3697	12.4524	12.1933	12.781	12.3084	11.9696	12.532	12.739	12.3184	12.4532	12.7547	11.9442	12.6544	12.0878	11.6351	12.0515	12.0232	12.2344	12.671	12.1425	12.0574	12.3297	12.2468	12.5472	12.0657	12.3508	12.2427	12.7732	12.134	12.5792	12.4768	12.2779	12.3706	12.3088	11.9431	12.2175	12.0982	12.0954	11.9499	11.8591	12.4452	12.2163	12.6733	13.807	12.0792	12.1657	11.7852
ARF5	9.53714	9.50339	9.59511	9.78655	10.0969	9.92755	10.0398	9.72251	9.76221	9.71455	9.94301	9.85925	9.41674	9.48329	9.67252	10.5091	10.1368	10.2334	10.1274	10.3497	10.4442	9.75893	10.1502	10.2926	10.2823	10.1747	9.9538	10.2103	10.0143	9.97197	9.86308	10.4039	10.8322	10.4207	10.139	9.92254	10.009	10.3523	9.81466	9.5097	10.5906	10.1764	10.9653	9.98995	10.3671	9.32439	10.2149	10.1272	10.6032
ARF6	10.1187	9.68528	8.75341	9.02549	8.92331	9.07898	8.47754	8.91672	9.31952	9.3054	8.76495	8.95947	9.6187	9.81875	9.75854	8.48778	8.77873	8.65587	9.21733	8.67419	8.85679	9.49459	8.15532	8.39594	8.87723	9.16229	8.9574	9.04141	9.54127	9.3834	9.8433	8.89683	8.45278	9.03578	9.31265	9.43407	10.2571	9.213	9.29361	9.21188	8.40036	8.80527	8.79955	8.22162	7.92358	9.29146	8.5126	9.9817	8.43981
ARFGAP1	8.19193	7.99528	8.2085	8.18654	7.87504	8.12687	8.17659	7.66892	8.0085	8.22493	8.05064	8.0646	7.92045	7.94116	8.04191	7.89038	7.86316	8.02889	8.01929	8.24744	8.14423	7.89635	8.45815	8.17805	8.09737	8.64743	8.22487	8.1173	7.95497	8.28925	8.11317	8.27474	8.50762	8.07382	7.99487	8.15098	8.27722	8.28575	8.11592	8.06664	8.61069	8.10253	8.01108	8.03397	8.04969	8.17786	8.28909	8.15315	8.27041
ARFGAP2	7.42624	8.13917	8.13966	8.37397	8.52978	7.94955	8.24172	8.07173	7.87921	7.88563	7.86573	8.09289	7.9565	8.17872	7.92259	7.5141	8.19401	8.12327	8.31197	8.59367	8.21039	8.12765	8.45674	8.26915	8.32839	8.86355	8.52956	8.31442	8.29658	8.06223	8.15645	8.28409	7.88752	8.05762	8.29505	8.31532	8.53788	8.01692	8.52194	8.1898	8.97535	8.17061	8.41127	8.18143	7.94853	8.07873	8.50007	8.15257	8.0407
ARFGAP3	11.5995	10.6082	10.8933	10.1839	10.2718	10.704	9.95731	10.2321	10.4833	10.826	10.2669	10.4964	10.7794	10.4188	11.2142	10.2556	10.2891	10.5281	10.1472	10.3891	10.289	10.9656	10.152	9.9433	10.2064	9.78936	10.4068	9.70318	10.7154	10.1468	10.6284	9.45417	9.35638	10.4161	10.4739	10.4461	9.40855	9.67695	10.6529	10.4318	10.168	10.4854	10.3862	10.4648	10.2641	11.3902	10.4845	10.221	9.94755
ARFGEF1	8.94274	8.91843	9.35176	9.26695	9.71458	9.26442	9.04356	9.55029	9.07358	9.02677	9.4649	9.64715	8.90492	9.01118	9.08076	9.25402	10.0887	9.99723	9.30605	9.52527	9.63967	9.49585	9.90119	9.58043	9.44081	9.06186	9.50608	9.76141	9.39307	9.14821	9.55561	9.85241	9.25697	9.63058	9.50238	9.20996	9.31914	9.61281	9.57301	9.23855	9.50377	9.69247	9.30598	10.3273	8.46111	8.95472	9.70405	9.06747	9.00518
ARFGEF2	9.33194	9.49462	9.88616	9.26508	9.08967	9.91921	9.42676	9.84341	9.40734	9.47442	9.29246	9.41924	9.67876	9.61026	9.71918	9.13976	9.47394	9.25612	9.64756	9.0057	10.016	9.58911	9.25593	9.18317	9.23128	8.22944	9.08106	9.48224	9.4838	9.46878	10.1703	8.87564	10.3949	9.03892	9.4331	9.52638	9.59525	9.56967	9.55175	9.524	8.9669	9.40024	8.70331	9.29522	8.78987	9.84145	9.20873	9.10308	8.67198
ARFIP1	9.31606	9.67573	10.1081	9.66407	9.56895	9.653	9.40769	9.52947	9.44084	9.26593	9.56848	9.69859	9.75438	9.86143	9.58806	10.2625	9.8627	9.60533	9.57119	9.72967	9.48929	9.80524	9.77474	9.34711	9.67479	8.45131	9.50251	9.77923	9.65893	9.40374	9.36344	9.53908	9.60023	9.33097	9.56663	9.80227	9.84333	9.44784	9.67546	9.38063	9.14765	9.84448	10.0433	9.70662	9.73281	10.115	9.7439	9.40721	9.07987
ARFIP2	7.59332	7.72192	7.7073	7.6091	7.96346	7.7811	8.23816	7.89295	7.74967	7.51689	7.61489	7.83828	7.77995	7.29921	7.38465	8.01327	7.82329	7.83292	7.89085	8.05244	7.94631	7.21142	7.83828	7.83803	7.76229	8.05202	8.03849	7.88919	7.57192	7.89862	8.02211	7.76006	8.15971	7.50723	7.83346	7.82259	7.81438	7.32078	7.62224	7.82752	8.47329	8.18274	8.61058	7.90018	8.2498	8.52247	8.24987	8.35366	8.00318
ARFRP1	7.5946	7.38684	8.3554	7.48219	7.43978	8.15585	7.69253	7.52016	7.44925	7.40146	7.64125	7.56592	7.55606	7.58174	7.58493	7.13355	7.60992	7.50266	7.34581	7.68495	7.7046	7.21468	7.34905	7.58805	7.54795	6.7209	7.72286	7.65214	7.42062	7.53467	7.46757	7.39568	8.42704	7.2305	7.49807	7.61302	7.28753	7.93143	6.9868	6.83515	7.36949	7.74439	7.40321	6.59241	6.64504	7.50691	7.30055	7.29257	7.34532
ARG1	4.70447	6.71795	4.68427	4.673	4.77622	4.79096	4.5347	5.01188	5.68083	4.7829	4.60178	4.52854	4.73463	4.64887	4.57281	4.43593	4.53301	4.5022	4.6701	4.61456	4.7138	4.57522	4.71404	4.74331	4.63832	4.74761	4.70951	4.47062	4.59889	5.12192	4.85885	4.55847	4.63186	4.32939	4.55536	4.38087	4.49246	4.59729	4.61028	4.76007	4.97627	4.57477	4.67576	4.89907	4.63758	4.5734	4.50444	5.04951	5.4085
ARG2	7.28114	6.61098	6.95538	6.16819	8.84715	5.50045	8.70769	10.5242	6.34372	5.73356	5.28209	6.75798	6.95932	7.00606	7.1085	9.6725	8.48184	7.8318	10.4994	5.7466	8.30392	7.28892	5.98822	8.08758	6.37413	8.67133	9.64099	6.76778	7.57981	6.20345	11.646	6.98255	8.40719	8.04423	8.42414	7.80513	5.67734	6.21223	8.30752	9.07046	7.75873	7.82054	8.30095	8.06474	8.07038	7.37884	7.34125	7.63709	8.68559
ARGLU1	10.325	11.2254	11.5433	11.7941	11.3395	11.4479	12.1026	10.4999	11.573	10.9793	12.0624	12.4383	9.90473	10.7333	11.0852	12.1212	11.7167	11.624	11.8192	11.8709	11.3341	11.5562	12.615	12.5424	11.4307	10.7981	11.7382	11.5303	11.8764	11.2471	10.9926	12.0485	12.0336	11.6248	11.661	12.0313	11.8078	11.5353	12.0389	11.4208	11.8555	12.1484	11.8864	12.454	12.2236	11.1929	11.5168	11.0709	11.7154
ARHGAP1	11.3569	11.1236	11.0716	11.1665	10.4821	10.9444	9.89677	10.9085	11.6103	10.8431	10.9639	10.5629	11.4907	10.9593	10.8667	9.37795	10.3224	10.246	10.5142	10.6722	10.2655	11.1083	10.2842	10.114	10.3838	10.821	10.2203	10.8125	11.0782	11.2628	10.5413	10.5448	9.82114	10.159	10.868	11.5375	11.6518	10.5868	10.8591	11.0056	9.8297	10.4644	9.46308	9.68649	9.14409	10.6357	10.4471	11.1236	10.0228
ARHGAP10	8.16046	8.37475	8.30836	7.93226	8.83416	8.18698	8.47682	7.93788	8.47038	8.37424	8.24221	8.50714	8.24945	8.40861	8.27702	8.9767	8.27928	8.49263	8.44601	8.64905	8.32515	8.16275	8.41118	8.59149	8.24392	8.1108	8.80319	8.78148	8.54067	7.80247	7.55823	8.62225	7.88836	8.09567	8.32168	7.54834	8.85057	7.82853	8.55177	8.15837	8.8522	8.725	8.89973	8.53088	7.99395	7.94469	8.44726	8.45635	8.62111
ARHGAP11A	4.9359	4.97892	5.14129	5.02975	7.334	5.75274	7.22364	4.49424	4.97987	4.91711	5.2743	5.91477	4.7052	4.78047	4.8273	6.69042	6.95883	6.31067	5.47993	5.61027	6.59437	4.67102	5.35119	7.30364	5.44965	6.5929	6.8547	5.82201	4.85612	4.61298	4.47783	6.49016	7.02209	5.11591	5.00455	4.59855	4.42572	4.82093	5.57562	4.84064	7.12102	5.58972	6.21422	6.61244	5.22366	5.54996	6.59547	3.85749	6.16164
ARHGAP12	7.63737	8.46075	8.72687	8.46112	8.44272	8.6389	8.14555	8.28794	8.56464	7.30608	8.42288	8.39347	8.2071	8.59694	8.30387	8.28693	8.18968	8.27697	8.07831	8.09454	8.06783	8.59325	8.26357	8.03082	8.06986	7.39122	6.83652	8.65911	8.61584	8.51165	8.23209	8.56584	8.49276	7.93044	8.10544	8.33181	8.6531	8.24007	8.33001	8.16002	7.68323	8.26077	8.20332	8.54044	7.35363	8.58342	7.73538	7.77835	7.89577
ARHGAP17	9.22334	9.59556	9.37662	9.30799	9.20046	9.13842	9.25018	8.626	9.58711	9.50107	9.61715	9.49507	9.38449	9.73215	9.69937	8.53494	9.40304	9.22456	9.1846	9.62004	9.22425	9.37615	9.39963	9.3272	9.49945	8.77666	9.65396	9.65456	9.5373	9.50102	8.88882	9.63062	10.0593	9.66003	9.50427	9.26728	9.25363	9.13494	9.63131	9.44232	9.55648	9.35966	8.94268	9.10357	8.94057	9.7279	9.73727	9.20087	9.47715
ARHGAP19	8.05612	8.08198	8.56723	8.39151	9.21306	8.88881	10.4287	8.33859	8.23008	7.59615	8.45383	8.37008	7.81379	8.12757	8.21875	10.0781	8.69228	9.13913	8.10197	8.68797	8.50092	8.34783	8.42336	9.05495	8.41899	8.99696	8.62446	9.18256	8.65565	8.50092	8.01582	8.94599	9.43099	8.39948	8.58393	8.54066	8.15276	8.63519	8.68219	8.04129	8.99677	8.56104	8.14691	9.25116	8.67307	7.70179	8.74103	8.03829	8.26825
ARHGAP22	6.41171	6.5024	5.43164	5.27941	5.15961	5.78276	6.55867	5.41048	5.96935	6.1769	5.61502	5.9527	6.73588	7.3755	6.49509	5.23761	5.08629	5.23863	5.57588	5.82022	5.12658	6.36676	5.73652	5.33661	5.59525	5.5068	5.23648	5.43931	6.2345	5.84725	5.37792	5.11198	5.37767	5.51353	5.41495	5.38294	6.20509	5.87089	5.96493	5.97935	5.30073	5.28137	5.15803	5.12577	5.32348	5.21456	6.0926	6.25854	4.81704
ARHGAP24	7.3403	7.0265	7.80106	8.24412	6.47435	6.91913	6.44533	9.23961	6.85925	6.96879	6.95309	6.67616	6.98293	6.94656	6.71884	7.28036	5.91738	7.08063	8.77739	7.3421	7.23985	8.05071	7.26454	7.25718	6.62911	5.85808	5.22511	7.55042	7.96883	6.18655	8.98106	7.39896	5.71159	5.86285	7.59521	7.11054	7.0265	6.97333	7.52697	8.47331	8.19752	6.02909	7.42329	6.18047	6.69761	6.24955	6.19874	7.61848	5.86784
ARHGAP25	7.81742	9.43305	8.09918	7.92382	7.54504	8.02813	7.49083	7.28723	8.41374	8.52476	8.48705	8.3099	9.15373	9.7203	9.03954	6.5199	7.19747	7.23205	7.31607	8.08402	7.42972	8.799	7.67967	7.24544	8.2619	7.66214	7.5955	7.97042	8.18748	8.6419	6.6495	7.83855	6.87464	8.27026	7.96568	7.60881	8.03361	7.49169	8.72839	8.51341	6.51802	7.99784	7.63857	7.41095	7.35505	7.2383	7.78629	7.34311	7.12965
ARHGAP26	8.3946	8.40094	7.153	7.45284	6.79006	7.68017	6.55746	7.20019	8.21418	8.66679	7.54641	7.55599	8.56663	8.8207	8.00856	6.30623	6.5004	6.60709	6.89045	7.08129	6.58624	8.05359	6.47174	6.65092	6.80913	6.79094	6.72242	6.75041	7.64945	7.53321	7.03607	6.30824	6.75798	6.78925	7.07539	7.35192	8.1743	6.86461	7.47954	7.655	6.39484	6.65642	6.47698	6.46192	6.8829	6.96703	6.656	7.32717	7.42486
ARHGAP28	5.42837	4.91933	4.94301	6.71332	4.96054	5.29746	5.00352	5.02268	5.16955	5.14164	5.18378	4.89191	5.07705	4.97938	5.26733	5.68102	5.91109	4.9015	4.97716	4.89866	5.07707	5.28052	4.9265	4.95162	4.71584	5.47549	4.94724	5.25839	5.25993	5.08932	4.95471	4.89307	5.29151	5.18173	4.8913	5.24134	6.44783	5.29429	4.68652	5.11706	5.23753	5.4572	5.03488	5.49398	5.43649	5.29151	5.06053	5.77497	5.14486
ARHGAP29	10.3352	9.84231	10.1316	11.2423	7.53365	10.2392	7.54517	10.4567	10.4315	8.72084	9.76528	9.12527	9.89126	9.31572	10.222	9.46602	5.8876	7.15622	10.348	8.1036	8.91943	11.7857	6.7765	7.17516	8.66447	8.95306	7.13465	9.67968	11.0712	10.9546	11.4327	8.6356	10.0381	9.13094	10.787	11.3939	10.5781	10.9455	9.96384	11.3285	4.53097	8.04637	7.73782	7.6663	8.46125	10.1014	8.2477	11.6953	6.81626
ARHGAP32	7.27766	6.60188	7.71038	8.25329	7.77655	6.69236	7.55436	7.70922	7.14056	6.69436	7.80598	7.50977	7.17559	6.26458	7.06247	7.07736	8.27059	7.79719	8.08428	8.22809	7.60631	7.5895	8.54462	7.70036	8.17181	8.92011	7.78845	7.60668	7.89255	7.16387	7.73346	7.60025	8.17306	8.92549	8.4869	8.65528	9.66131	8.35633	8.25253	7.38968	8.83059	8.01337	7.13767	7.36063	7.40398	7.35813	8.39316	8.73891	7.90157
ARHGAP33	7.4701	7.34719	7.05968	7.51565	7.32128	6.86972	7.42611	7.3155	7.23968	7.41604	7.15371	7.38852	7.41237	7.15817	7.25892	7.30312	7.30048	7.37493	7.27437	7.37182	7.20008	6.80995	7.38724	7.37351	7.16411	7.92374	7.77881	7.2318	6.91074	7.23261	7.12674	7.2045	7.58232	7.1911	6.93581	6.96224	7.09336	6.94352	6.98698	7.21055	7.41093	7.45016	7.28718	7.44422	7.60598	7.41788	7.3526	7.33394	7.53125
ARHGAP35	6.96557	6.98735	7.00459	6.9783	7.10988	6.59986	7.00882	7.34724	7.12688	6.90131	6.84355	6.95204	6.9896	7.11624	6.86665	6.99461	7.2555	7.2135	7.1165	7.17651	7.01087	6.78365	7.12705	7.18479	6.97256	7.33573	7.25899	7.06684	6.79192	6.87976	7.36463	7.03151	7.10244	6.84395	6.83854	7.03151	6.99938	7.19105	6.79126	6.80067	7.0865	7.05251	7.28602	6.8757	7.22261	7.09682	6.90008	6.73593	6.9752
ARHGAP4	8.07453	8.57026	7.67792	7.74736	7.68318	7.76615	7.87783	7.56148	8.1648	8.58678	7.9662	7.81615	8.24866	8.4144	8.55117	8.00355	7.65077	7.54158	7.89736	7.78094	7.49903	8.0605	8.03959	8.10822	7.86992	8.05094	7.88382	7.58245	8.16326	8.07349	7.92202	7.89337	7.70675	7.93789	7.74878	7.89022	7.87018	7.67472	8.03089	8.16673	8.04606	7.64674	7.88743	7.47902	7.94817	7.64123	7.75367	8.16074	7.99015
ARHGAP44	6.26052	5.39687	8.12362	7.22569	6.02089	6.52724	6.05477	6.43267	6.46978	6.31131	6.90267	6.4306	5.79452	5.93796	6.05657	5.98353	6.43267	6.57644	6.62862	7.14664	6.07776	6.64864	6.45243	6.11888	6.7585	6.09534	6.58093	7.07485	6.98971	6.58013	6.97478	5.73536	6.1031	6.56762	6.56831	6.85845	7.5441	6.2741	6.68719	6.41498	6.32626	5.99669	6.32786	5.60507	5.96734	6.70077	6.6616	5.92204	5.79866
ARHGAP45	8.47503	9.72093	8.39395	7.86266	7.22907	8.34108	7.31822	8.01418	9.08629	8.9531	8.2887	8.31145	9.04151	9.58201	9.3491	7.27211	6.65102	7.1753	7.53332	7.51276	7.22166	8.87172	7.34683	7.26509	7.9954	7.44807	7.17274	7.50952	8.66055	8.94636	7.43269	7.25618	7.07391	8.00418	7.6656	8.04699	8.04277	7.96766	8.68245	8.83689	6.72406	6.56427	7.16286	6.63778	6.83055	7.10796	7.2275	7.6868	6.97732
ARHGAP5	9.15922	8.93985	9.9463	9.67109	9.21916	9.08103	9.43589	9.39453	8.71666	8.51213	9.91762	9.71696	8.69777	8.53841	9.19876	9.94994	10.5222	9.24617	9.93347	9.99822	9.62485	9.21619	9.77838	10.2437	9.78659	9.22899	9.4	9.96695	9.45908	9.19241	9.44823	9.55316	9.06732	9.8321	10.2685	10.7616	10.1658	9.68166	9.87144	9.39443	9.6221	10.3959	9.46015	9.35632	9.42467	9.4474	10.05	10.1006	9.65951
ARHGAP6	7.51963	8.03333	8.60289	8.82728	7.44594	7.65101	7.36669	8.08673	7.58186	7.77707	8.496	7.40152	6.92539	7.08511	7.95773	7.37523	7.0839	7.90754	8.83966	7.80411	7.61205	8.20173	7.31476	7.49821	7.65999	7.19618	7.4149	6.17713	8.14673	7.32438	9.02791	6.58354	6.64711	7.34103	8.29059	8.1969	8.25048	7.48746	8.36902	8.00879	7.69305	8.53926	7.72463	6.70516	7.29484	7.6768	7.60072	8.64795	6.93875
ARHGDIA	8.56368	8.16013	7.75504	7.99305	8.26748	8.07986	7.9722	8.12531	8.21302	8.47341	7.94926	7.73627	8.57361	8.40235	8.50917	7.65587	7.77719	7.91424	8.05301	7.99438	7.82668	7.93625	7.83828	8.01453	7.63797	8.65851	8.14747	7.87917	8.02585	8.244	8.13331	8.14949	7.81192	7.77514	7.88295	8.12558	8.07986	8.05195	7.90046	8.27689	8.16701	7.84502	8.01564	8.20843	8.43107	8.29392	8.23808	8.5609	8.07986
ARHGDIB	11.0699	11.701	10.3526	9.61142	9.00664	10.7112	7.61054	10.0814	11.3287	11.4627	10.6882	10.0145	11.6251	11.8217	11.6375	8.23608	7.43452	9.12817	9.29636	9.7121	8.78155	10.9878	8.64609	7.75592	10.1712	9.29481	7.87842	9.6383	10.8112	11.0819	9.17087	9.26641	7.87216	10.3909	10.2321	9.58954	9.80947	9.67433	11.0728	11.0439	7.09739	8.48464	8.98104	8.71869	8.32352	9.03851	8.95837	10.0311	9.73206
ARHGDIG	6.70705	6.92385	6.66471	6.5711	6.57494	6.56122	6.92542	6.75608	6.71717	6.92372	6.65642	6.75604	6.92272	6.65642	6.99655	6.62324	6.54344	6.60848	6.7359	6.52866	6.53971	6.60732	6.65642	6.58859	6.56181	6.63082	6.65683	6.53385	6.63135	6.73663	6.64082	6.39896	6.57125	6.61954	6.41844	6.39864	6.30332	6.74572	6.42414	6.68833	7.01484	6.59023	6.89679	6.60646	7.16618	6.83247	6.63483	6.84104	6.87286
ARHGEF10	8.82325	8.51452	9.19007	8.77053	8.5662	9.52063	9.41866	8.35117	9.0673	8.17614	8.99637	9.21106	8.30413	7.80906	8.60518	8.41367	8.38376	9.10826	8.77197	9.10908	8.44142	8.81615	9.05339	8.15274	8.71772	8.45239	8.39416	9.44277	9.0792	8.6928	8.03518	9.01913	8.41882	8.67856	8.92315	8.88117	8.70336	9.57982	8.57944	8.78963	8.15204	8.71473	7.92695	8.49792	8.64268	9.11763	9.21062	8.81631	7.63682
ARHGEF10L	7.90442	8.30794	8.52084	8.35417	7.73996	8.21677	8.15562	8.91925	8.23199	8.21843	8.23835	8.16471	8.52394	8.41879	8.43235	7.87733	7.81482	7.86646	8.81552	8.28399	7.71854	8.95283	8.25825	7.50622	7.84301	7.82612	7.42245	8.22901	8.82332	8.34408	8.87888	7.76498	7.95356	7.88949	8.4573	8.93479	8.88775	8.55152	8.72412	8.90792	8.22593	8.21677	7.76616	7.12629	6.95149	8.02769	8.11557	9.02357	7.45215
ARHGEF11	7.03014	7.0291	6.69694	6.96081	6.95694	6.89767	7.08587	6.57484	7.1403	7.31886	6.7854	7.0291	7.12775	7.1929	7.164	6.6827	7.25995	7.23166	6.81553	7.16067	6.68609	6.35784	7.13991	7.31042	6.79501	7.67871	6.96349	6.99373	6.82336	7.17882	6.74774	7.02388	7.17015	7.22481	6.67659	6.8829	7.14549	7.0291	6.86048	6.86976	7.0291	7.05564	7.00573	7.26877	7.36481	7.09231	7.09981	7.10579	7.47472
ARHGEF12	10.7077	10.5999	11.015	11.0249	10.6318	10.2218	10.6924	11.7629	10.4787	10.0136	11.0607	10.4046	10.3762	10.1945	10.5974	10.3962	10.367	10.7868	11.3959	10.9928	10.1905	11.2955	10.8014	10.5705	11.0998	10.8567	10.2569	11.1401	11.289	10.9283	11.9494	11.1239	10.4824	11.0603	11.6368	12.1837	12.8523	11.3884	11.1834	11.4775	10.577	11.1126	10.1425	10.6831	10.697	11.1848	11.1793	12.2969	10.5214
ARHGEF15	6.63032	6.6506	6.41039	6.61567	6.54414	6.38115	6.73143	6.87763	6.65351	7.11996	6.74487	6.75285	6.47894	6.59276	6.62572	6.48597	6.80286	6.84936	6.79	6.65351	6.54742	6.12485	6.88519	6.64014	6.61323	6.94787	6.95831	6.46629	6.33557	6.66034	7.00726	6.66062	6.68162	6.72322	6.50324	6.51884	6.59293	6.67065	6.40208	6.74861	6.69628	6.52352	6.60519	6.47575	6.80075	6.46201	6.61938	7.30382	6.82957
ARHGEF16	6.8404	6.75999	6.32698	6.85333	6.69438	6.58562	7.22095	6.95271	6.63555	6.80979	6.5285	6.59958	6.59657	6.81795	6.62393	6.30983	6.70837	6.71486	6.79522	6.68203	6.51431	6.65703	6.72253	6.45569	6.90285	7.02157	6.90975	6.52909	6.72783	6.74102	7.23585	6.73546	6.76061	6.33427	6.42538	6.28032	6.39574	6.6102	6.43456	6.92859	7.10591	6.66975	6.69658	6.92385	7.08506	6.53026	6.99305	7.19014	7.21871
ARHGEF17	8.15019	8.07017	8.24034	8.44364	7.89095	7.92677	8.14754	8.07227	8.35631	8.14439	8.56988	8.14319	7.88761	7.91354	7.92853	7.95191	7.87408	8.26272	8.34414	8.39926	7.85696	8.06454	8.20998	8.28786	8.02396	8.30182	8.27333	8.60487	8.20852	8.37245	8.19291	8.52298	7.94436	7.90463	8.32	8.42957	8.52141	7.93849	8.34022	8.38768	8.03554	8.17981	7.78845	7.99677	8.15714	7.91519	8.234	8.20259	7.93535
ARHGEF18	8.40661	9.5805	8.83442	8.54548	8.79858	8.79231	9.21662	8.78316	8.84685	8.87448	8.78864	8.80276	9.15112	9.91631	9.28289	8.82691	8.90156	8.8934	9.1079	9.00738	9.00631	9.04605	8.79073	8.5271	8.95188	9.43333	8.93225	9.24344	8.96998	9.07954	9.21609	8.97857	8.18152	8.85856	8.85256	8.88668	8.93608	9.23812	9.2909	8.78945	8.9319	8.99379	7.949	8.33121	7.89468	8.76328	9.23901	8.61888	8.17116
ARHGEF2	8.62061	9.3115	8.44241	8.78122	9.5274	9.28506	8.5644	7.25526	8.98438	9.75889	8.75072	9.03409	9.1511	9.1439	8.93866	9.20643	9.56247	9.26237	8.88725	9.10301	9.24783	8.80366	8.91886	8.96253	9.01811	10.4457	9.00381	9.01223	8.83599	8.82916	7.94729	8.68569	9.203	9.37656	8.74716	8.56974	9.68037	8.98577	9.20567	8.7616	9.13434	9.08269	8.5688	8.97969	8.98716	8.92743	9.64966	8.27196	9.1486
ARHGEF26	4.63595	4.1705	5.58068	4.18064	4.06959	4.62833	3.70373	4.53163	4.49685	3.89541	4.30294	3.86055	3.96385	3.65626	4.12847	3.88337	4.40501	4.26162	4.52204	4.26298	4.87934	4.25943	3.82896	3.80319	4.46588	3.85487	4.04662	4.88711	4.60776	4.30098	4.14829	3.96178	4.77663	3.6724	4.6993	3.66308	3.95227	4.12091	4.19585	3.74077	3.98513	4.63374	4.06799	3.65448	3.91959	4.09608	3.87802	4.13479	3.67268
ARHGEF28	7.00763	6.69002	7.44891	7.80315	7.50573	6.81101	7.55254	8.96484	6.77172	6.21148	7.51124	7.31228	6.90762	6.18311	6.7547	7.29136	7.86074	7.6247	8.55574	7.6253	7.32247	7.91252	7.74373	7.73987	7.78292	6.6929	7.78262	7.38941	7.71197	7.28516	8.56445	7.39781	6.56173	6.67515	8.1796	8.47326	8.31643	7.22023	8.15951	8.69572	7.47562	8.59546	8.1003	8.0595	7.6945	7.24914	8.08158	7.60149	6.93626
ARHGEF3	9.78574	9.62727	9.38462	8.96923	9.36178	9.33557	8.94613	10.0239	9.17735	8.56462	9.29562	8.81319	9.80654	9.79956	9.61904	9.52141	9.81048	8.75311	9.61957	8.96911	8.93302	9.93597	8.69435	9.81785	9.2503	9.21955	8.99784	8.9091	9.95176	9.60768	9.93512	8.42176	8.94706	8.8269	9.70325	8.98879	10.2583	9.19828	9.59434	9.68097	8.65089	10.0381	8.18339	10.1759	7.60695	8.93949	9.17065	10.2271	8.72299
ARHGEF38	5.35084	5.34358	4.91822	5.00823	5.15066	5.13138	4.96033	5.13138	5.22545	5.6079	4.98574	5.14522	5.29356	5.27538	5.12249	5.1973	5.11097	5.00996	5.08773	5.03519	4.83167	5.01097	4.99263	5.06781	5.0862	5.13138	4.91093	4.84045	4.92948	5.11905	5.2122	4.98914	5.07525	4.85774	4.79859	4.80749	4.84474	4.84637	4.83014	5.41889	5.57681	5.42448	5.335	5.59133	5.55176	5.24985	5.18181	5.40142	5.62839
ARHGEF4	5.99905	5.55783	6.03637	5.7425	6.62057	6.24128	6.71767	5.74472	5.94223	5.44206	5.81622	5.89405	5.42524	4.8981	5.25391	6.05658	5.9858	5.93493	6.42051	6.16757	5.75753	5.49453	6.20893	6.15022	6.37859	6.53467	6.0884	5.80144	5.67765	5.95243	5.9602	5.96009	6.26803	6.1482	5.99905	5.06771	5.54176	6.26823	5.99905	5.43403	7.66175	5.85373	6.37583	6.2074	5.99947	6.27386	6.86366	5.99828	6.30469
ARHGEF40	9.44473	9.5703	9.97315	9.97961	9.43821	9.84688	9.0814	7.96854	9.41379	9.11351	10.1515	9.84993	9.10285	9.06785	9.47035	10.9317	11.3941	10.1726	11.4204	10.4299	9.69528	9.5606	10.428	9.31689	9.55305	10.5378	10.0036	10.622	9.95526	9.62915	8.70156	10.3463	9.35755	10.0335	10.246	9.39829	10.5241	11.0131	11.0861	8.5863	9.68644	10.3219	9.99404	8.68918	8.64873	9.45204	10.3911	9.24994	9.90982
ARHGEF5	6.93381	6.40473	6.85431	7.23648	7.81232	6.66109	7.59904	7.15267	6.7028	6.32129	6.982	7.17719	6.83824	6.77969	6.7336	7.59491	7.90337	7.4659	7.6432	7.38031	7.25384	7.44205	7.36138	8.10181	7.07492	7.36993	7.35055	7.39936	7.35494	6.99641	8.08348	7.75892	7.23988	6.94153	7.4641	8.44516	7.8049	7.40689	7.57669	7.47309	7.75836	7.94278	7.39543	7.19897	7.7933	6.53433	7.48094	7.79006	8.06013
ARHGEF6	9.00879	10.0505	9.56663	9.02653	6.76463	9.23187	6.77815	8.29525	9.60369	9.23984	8.81096	8.36069	9.45229	9.66852	9.60404	6.48303	6.25902	7.19618	7.78468	7.85824	7.82916	9.5356	6.99192	6.4834	8.39267	7.62777	6.47833	7.86923	9.31863	9.23416	7.83147	7.39025	7.1893	8.17465	8.50046	8.65128	8.82242	8.21617	8.86629	9.24588	6.27363	6.5956	6.99547	6.80873	6.67615	7.62805	7.00958	8.34799	6.88329
ARHGEF7	9.16196	9.33996	9.07208	9.3719	8.93415	9.70681	9.52191	9.15092	9.54439	9.40856	9.51535	9.68238	9.02175	9.08146	9.2444	8.40275	8.74276	9.75566	9.1124	9.90047	9.64825	9.10864	10.1103	9.23755	9.12543	8.51705	8.94961	9.94431	9.33654	9.11882	9.15483	9.58649	9.9058	9.92709	9.395	8.77107	9.21428	9.49812	9.33419	9.29361	9.88882	9.2968	8.62148	9.90011	9.60865	8.92328	9.78653	8.45921	8.91476
ARHGEF9	7.12397	7.5403	8.40175	5.00892	6.99186	7.53164	7.84137	7.70808	7.49684	6.79406	7.77333	7.26479	7.00859	6.80907	6.51791	7.3952	7.50063	7.14792	7.93363	7.88337	8.01107	7.52991	7.52776	7.44684	7.71346	7.5403	6.80782	7.85204	7.50959	7.48854	8.02956	8.14852	7.84014	7.09902	8.14272	8.00847	7.79834	7.21003	8.05149	7.91743	7.42466	7.91913	8.16341	7.22164	6.32084	8.37516	7.85654	7.54753	6.20812
ARID1A	9.50593	9.80087	10.2798	10.2693	11.117	10.0291	10.7429	9.36522	9.57381	9.8582	10.719	10.9439	9.77718	9.98529	9.85922	10.2222	10.9962	11.1074	10.4809	11.1251	11.1387	10.0733	11.1922	11.0826	10.9186	10.9762	11.3829	11.2563	10.1572	9.89153	9.86279	10.467	11.5341	11.4714	10.9337	10.0774	9.91621	10.4482	10.6949	9.76164	11.1988	11.1915	9.8043	10.7101	10.7793	10.5208	11.2097	9.94238	11.4136
ARID3A	6.81782	7.31525	6.82265	7.23975	8.07001	7.22314	8.83099	6.85006	7.30722	7.81485	7.29396	7.40341	7.3454	7.59955	6.85893	6.5967	6.9852	7.94528	6.80287	7.88987	7.62772	7.12872	7.85129	8.12202	7.31257	8.59946	7.58432	7.73894	7.13215	7.17072	6.92914	8.01649	7.7868	7.2893	6.84737	6.77888	6.76816	7.3454	7.3454	7.04959	7.78613	7.23094	6.82451	8.51483	6.97029	7.44872	7.6807	6.42283	7.66807
ARID3B	7.20777	7.05017	7.20472	6.66751	8.89768	6.7529	9.76328	6.95329	6.89724	7.39845	7.25725	7.54221	6.92113	6.99232	6.63687	7.11143	7.40858	8.5405	7.2256	8.16719	7.86201	6.83417	8.05827	8.91442	7.626	9.79717	8.83727	8.46328	7.03075	6.88837	7.31484	8.65333	7.92157	7.45847	7.04291	6.60476	7.29754	7.13982	7.19266	6.88085	8.84046	7.49677	6.95488	8.87218	8.26888	7.3318	7.94364	7.4001	8.37007
ARID4A	7.92373	8.32831	8.96001	8.78465	8.27419	8.29012	7.9164	8.02538	8.472	7.89632	8.10014	8.32463	8.03096	8.22245	8.41425	8.35005	8.46283	8.10969	8.15537	8.31355	8.31559	8.59562	8.00821	8.0819	7.87886	7.22614	7.62229	8.29973	8.60229	8.26556	7.76888	8.3044	7.28528	8.02667	8.21357	8.26249	8.36792	7.98733	8.27135	8.16859	7.96648	8.42715	8.39193	8.3936	7.73614	7.99209	8.12184	8.03546	8.05949
ARID4B	9.77801	9.83839	10.6537	10.5691	10.9952	10.2928	10.6702	9.39	10.0127	9.94152	10.4842	10.6228	9.78594	9.99824	9.99958	10.4475	10.6168	11.0421	10.4067	10.8322	10.6097	10.4674	10.8136	10.8484	10.6286	9.49745	10.5567	11.0163	10.3869	10.2089	9.72216	10.7966	10.8998	11.0226	10.4942	10.6456	9.9393	10.8791	10.5972	10.0405	10.605	10.746	10.4349	11.4379	10.0633	10.4275	10.6901	9.7833	10.8275
ARID5A	7.67982	7.59832	7.18542	7.28448	6.72397	6.92541	6.83074	6.84652	7.78658	7.97318	7.0078	7.35474	7.81554	7.5908	8.16673	6.57345	6.77589	6.48647	7.0937	7.22895	6.95692	7.16272	6.64053	6.80262	7.0239	7.35856	7.28869	7.04714	7.30538	7.4781	7.31315	6.73761	6.92588	7.3156	7.46527	6.84455	6.69035	6.73949	7.3323	7.47068	6.5172	6.4291	6.44287	6.68629	6.76925	6.65754	6.76143	7.15089	6.61233
ARID5B	11.6392	10.8902	11.2816	11.4034	9.93452	11.1302	9.04954	11.1867	11.1224	11.2519	10.5904	10.4134	10.9789	10.1119	11.5628	8.0116	9.70731	10.3845	10.6464	10.645	10.1654	11.0516	10.3891	10.529	10.8589	10.2806	10.8522	10.7386	10.9039	11.2667	11.8946	11.3941	9.61235	10.8689	11.4907	10.6883	9.80827	10.0629	10.8355	10.8372	9.54888	11.3406	10.1738	9.66413	8.67495	10.1556	10.354	11.1783	10.5163
ARIH1	9.01516	9.03259	9.26279	8.96111	9.14303	9.09029	10.1386	8.51052	9.06915	9.15889	9.28018	9.3902	9.13523	9.20737	9.22591	9.04051	9.03263	9.31525	9.16291	9.72675	9.58435	9.00155	9.5262	9.1653	10.1229	9.5675	9.4334	9.58447	9.09615	8.76652	8.94578	9.41022	8.50118	9.81443	9.54627	9.20529	9.24775	9.73379	9.44276	8.91023	9.76163	9.91221	9.19961	9.10567	8.8731	9.2416	9.47298	8.91006	9.06652
ARIH2	7.9715	8.21997	8.39748	8.4848	8.51746	8.11941	8.28073	8.00613	8.25564	8.04403	8.46998	8.38868	7.8974	8.15722	8.19366	8.57454	8.641	8.60499	8.58762	8.7245	8.90892	8.08653	8.65148	9.25731	8.82939	9.19929	8.52258	9.01608	8.54596	8.52128	8.10148	8.8421	8.73395	8.72482	8.80833	8.98301	9.18185	8.77713	8.72058	8.28826	9.15424	8.56679	8.59623	8.65117	8.07496	8.16327	8.51942	8.46457	7.8653
ARL1	9.7801	9.63531	10.4568	10.5204	9.30454	10.1439	9.77817	10.013	9.79092	9.7756	10.2464	9.89518	9.66866	9.1342	9.47915	10.4008	9.68006	9.82088	9.98939	10.0121	10.0517	9.75864	9.94301	10.0641	10.4837	9.60713	9.82781	10.1639	9.88693	10.0577	10.1409	9.4141	9.29844	10.0898	10.143	10.4759	10.5445	10.848	9.79616	9.60468	9.35918	10.0199	10.2786	9.54776	9.64043	10.8062	9.85294	10.0828	8.72451
ARL14	3.7386	3.51602	3.62696	3.6029	3.91507	3.88836	4.07586	3.74137	3.80686	3.5869	3.49207	3.60345	3.88265	3.6824	3.65595	3.87534	3.76485	3.77899	4.23232	3.83383	3.69016	4.01794	3.71753	3.84975	3.67659	3.78485	3.93567	3.74062	3.80231	4.85604	4.87534	3.89231	3.85271	4.02317	4.01558	3.5869	3.72032	3.59478	3.78474	3.65965	3.75697	3.84975	3.84899	3.75816	3.66936	3.90993	3.54916	4.20649	3.91214
ARL15	8.01724	7.96079	6.98278	6.44333	7.08554	6.93808	6.5287	7.77234	7.77656	6.69847	7.65626	6.59415	8.38217	8.21437	7.83109	7.50745	6.67134	7.13138	7.08617	6.22438	6.31937	7.0559	5.56401	5.92935	6.07254	5.21563	6.25033	6.1239	7.33382	7.14167	7.7539	5.42885	5.98521	6.44932	6.76174	6.8033	5.91722	5.09511	6.64912	6.85344	5.89314	6.86578	6.77743	5.89053	6.21458	7.2332	7.22435	6.66744	6.60841
ARL2	8.27087	7.7445	8.246	8.17386	8.92184	8.44096	8.41904	8.73247	8.25797	8.00459	8.00724	8.03521	8.0744	7.8384	7.84016	8.02541	8.21154	8.78226	8.76312	8.11909	8.69199	8.11751	8.00118	8.83487	8.20942	8.55688	9.00085	8.04649	8.21351	8.17525	8.67596	8.25235	9.23703	7.76511	8.22885	8.31354	7.3541	8.34065	7.94653	8.6165	9.11345	8.70023	8.75597	8.88884	8.69426	8.84482	8.69646	7.57582	8.93409
ARL2BP	9.82757	9.49363	10.0447	9.6417	8.53042	10.0484	9.58169	9.48066	9.68651	9.15468	9.5454	9.5857	9.73858	9.318	9.54951	9.79425	9.84034	8.72345	9.22425	9.85991	9.67401	9.52212	9.76297	8.41526	9.35437	9.31221	8.74457	9.85033	9.6265	9.73056	9.36718	9.78809	9.23539	9.59878	9.80116	9.74669	9.03497	10.1822	9.39429	8.9107	9.08246	9.31043	9.53157	8.47051	9.43787	9.54548	9.19084	9.04633	7.94522
ARL3	9.13361	9.12806	9.28081	9.20646	10.2747	9.54122	10.1081	9.70803	9.21861	8.65895	9.43933	9.47386	9.07274	8.77504	8.84668	11.4476	10.4265	10.1532	10.6558	9.89652	10.2802	9.55603	10.3519	10.391	9.73787	10.7953	10.8631	10.3354	9.703	9.60849	10.0226	9.99492	11.0147	9.84529	10.0485	10.6545	10.7687	10.5745	9.85042	9.16068	10.4507	9.84007	10.7669	10.3285	10.2467	10.2817	9.60571	10.5071	9.90298
ARL4A	10.2263	9.12871	9.44856	10.4076	8.18645	9.42815	8.60974	8.57189	9.37264	9.29829	8.97213	9.15659	9.92984	9.08031	10.0174	9.25013	9.53139	9.01472	8.94584	9.17458	9.24091	9.22243	8.22303	7.96575	8.8055	8.97031	8.20803	8.77219	9.62472	9.67508	8.39394	8.16111	9.47879	8.63864	9.55351	10.343	9.25534	9.38981	9.17538	8.72513	7.28972	8.36452	9.07739	8.49966	8.54778	8.35828	8.11543	9.28989	8.57584
ARL4C	11.4643	12.0985	9.10827	10.3903	10.094	10.2895	7.61191	8.7155	11.7843	12.0541	9.3334	9.39403	11.8601	10.9464	11.987	8.08095	8.15082	7.49674	8.50705	8.3184	8.94658	11.1671	6.57051	7.48415	8.67656	9.10135	7.32832	8.7936	11.737	10.7379	8.12921	7.22764	8.19906	9.29688	9.786	10.4365	11.3342	10.389	10.495	10.8996	7.6719	7.17892	6.68561	8.08028	7.92083	9.28911	6.06545	10.8853	9.93296
ARL4D	7.79198	7.34944	8.26023	7.50507	7.55027	7.5471	7.52497	8.15276	7.43214	7.61465	7.84702	7.81662	7.54542	7.03467	7.31309	7.14452	7.09234	8.05673	8.00349	8.55859	7.09893	7.44383	8.25807	7.70932	7.05994	7.5083	7.58966	8.27067	7.77692	7.27387	9.15086	8.32511	7.32474	7.34686	7.36464	8.86445	7.90889	8.04316	6.89738	7.84295	7.88595	7.2366	7.60831	8.02061	6.99342	7.80322	8.92963	8.38765	7.19527
ARL6IP1	10.797	11.1455	11.232	11.2788	11.5165	10.8746	11.4489	10.828	10.8926	10.8516	11.081	11.0681	11.18	11.4746	11.1468	11.7154	11.7039	11.4894	11.4777	11.5142	12.063	11.3384	11.3932	12.0811	11.8361	12.1093	12.1076	11.9462	11.4925	11.2365	11.379	11.8701	12.6151	11.3497	11.5442	11.1199	11.5587	11.7497	11.69	10.7069	11.4142	11.2457	11.9894	11.9914	12.0245	10.7367	11.5591	10.7016	11.517
ARL6IP4	9.43808	9.62487	9.61292	9.64854	10.043	9.59312	9.87882	9.94983	9.73207	9.74974	9.69682	9.62858	9.55162	9.62437	9.56588	10.2249	9.87929	10.165	9.8294	9.64134	9.63067	9.3568	9.41832	10.4045	10.232	9.49214	10.2063	9.6809	9.72542	9.65187	9.77232	9.70232	9.63937	9.70728	9.76926	9.59533	9.80515	10.0118	9.48708	9.76977	10.0965	9.79199	10.3919	9.66732	9.03828	9.68041	9.69986	10.1606	9.67432
ARL6IP5	11.9922	12.5249	12.0949	11.3063	10.9131	11.9319	10.5034	12.0745	12.1462	11.8461	11.4475	11.336	12.3864	12.5297	12.0418	11.0894	10.1826	10.7339	10.8716	11.1129	10.933	12.1933	10.7212	12.1973	11.1576	10.6623	11.2008	11.0069	11.9116	11.7813	11.5382	10.7773	10.1571	10.9276	11.3146	11.6953	11.237	11.5366	11.6079	12.1336	9.37892	11.1614	10.9659	10.845	10.9592	11.5904	10.6999	11.0313	9.79027
ARL8B	11.4222	11.5298	11.5673	11.2503	10.7684	11.0967	10.3658	11.2518	11.503	11.8607	11.3567	11.2601	11.6242	11.8886	11.6458	10.8195	11.2286	10.8352	11.097	11.3134	11.0699	11.4195	11.0318	11.2825	11.3947	10.9798	11.1856	11.3075	11.3785	11.3445	11.1533	10.8531	11.0475	11.1733	11.2952	11.3757	11.3121	11.5313	11.5237	11.1578	10.7229	11.403	11.2844	10.9149	11.0576	11.2129	11.0906	11.0269	10.797
ARMC1	9.43869	9.68332	10.0007	9.8549	10.2068	10.2801	9.97866	9.72193	9.84698	9.37107	10.1343	10.007	9.65822	9.81098	9.68611	10.9179	10.2486	10.4154	9.97705	9.98921	10.6564	9.80636	10.2229	10.5594	10.1822	9.66801	10.6217	10.1047	9.9315	9.80323	9.37502	10.433	10.9135	10.0991	9.91916	9.93999	10.0006	10.559	9.94051	9.75236	9.72013	10.1981	10.6141	9.88461	10.4477	10.0325	10.0148	8.71568	9.61094
ARMC4	6.30639	6.19669	6.33717	6.28053	6.32708	6.10279	6.1765	6.1112	6.19677	6.4045	6.21314	6.01408	6.28031	6.13464	6.3719	6.17536	6.17481	6.30866	6.2669	6.33564	6.00312	6.15454	6.09239	6.34143	6.19969	6.35869	6.49096	6.09849	6.04861	6.06166	6.17629	6.13462	6.21726	6.08507	6.01774	6.10806	6.29382	6.21309	5.91916	6.28763	6.52365	6.39978	6.66294	6.53985	7.07271	6.1341	6.39025	6.36158	6.54697
ARMC6	6.69712	6.8871	6.6548	6.86975	7.22388	6.72052	7.56128	6.85111	7.02402	6.76033	6.8896	6.85252	6.61691	6.78825	6.79712	7.00758	7.0646	7.06164	7.17948	7.27797	6.83474	6.65181	7.16694	7.40572	6.89874	7.59887	7.6398	6.91266	6.81065	6.8621	7.15724	7.30711	7.04171	6.93168	6.8871	6.73843	6.86919	7.062	6.7467	6.17892	7.47132	7.10228	7.36464	6.97148	6.96888	6.99794	6.93761	6.98465	6.81626
ARMC7	7.6217	7.62322	7.51122	7.69759	7.61654	7.55698	7.74753	7.80132	7.75045	7.85243	7.48728	7.60031	7.69759	7.80123	7.62129	7.49799	7.70901	7.61724	7.911	7.70269	7.69609	7.42902	7.87531	7.89373	7.70561	7.81199	7.96438	7.65012	7.59526	7.82619	8.11405	7.8749	7.4429	7.67383	7.4045	7.57587	7.67627	7.55706	7.49537	7.88906	8.08972	7.75723	7.67182	7.67344	7.80452	7.68618	7.70943	7.97482	7.69759
ARMC8	8.0864	8.04716	8.57352	8.41835	8.21932	8.07821	8.19152	8.30699	7.90553	7.74398	8.24139	8.26614	7.56568	7.86676	8.148	7.71297	8.60337	8.24678	8.35475	8.33558	8.19737	8.25847	8.40493	8.17517	8.03594	7.09339	8.23397	9.06135	8.22469	8.26015	8.2999	8.42423	7.32016	8.24268	7.93176	8.51356	8.77666	8.2736	8.28298	8.28155	8.50113	8.58596	8.13982	7.95823	7.91955	8.75282	8.21489	8.08825	7.35238
ARMC9	8.00964	7.17549	6.30934	6.4258	7.66501	7.83744	8.46956	5.63195	7.45247	6.83778	7.20202	7.63704	8.13889	7.54921	6.56281	7.7322	8.18905	7.96773	6.24105	7.41684	7.28616	6.75668	7.52367	7.27451	7.08083	7.14979	7.83976	8.16746	6.45765	6.54502	5.84926	7.63665	8.46506	7.72485	6.87162	6.35949	5.61365	6.6748	7.19266	6.08359	7.56725	7.22269	7.86237	7.28197	6.66968	7.01731	7.97992	6.071	6.63518
ARMCX1	9.14454	9.8808	11.0998	10.7062	9.96736	10.2226	9.88455	9.37208	10.3812	9.47701	10.2815	10.0325	9.73734	9.77992	9.66958	10.4067	10.0164	9.75566	10.3286	10.7101	10.8285	10.5938	10.2699	10.1113	10.1737	9.91503	10.3935	10.223	10.4837	10.1656	9.58501	10.2537	10.7915	9.83068	10.4849	10.6794	11.0005	10.3673	10.5385	9.7777	9.20697	10.6685	10.7331	10.1803	9.95324	10.8087	10.1124	10.1578	9.61808
ARMCX2	9.17432	9.56506	10.6642	10.6205	10.3772	10.6362	11.2294	9.72808	9.59864	9.21964	10.3551	10.2657	9.62174	9.15058	9.32133	10.5518	10.5805	10.0773	10.537	10.509	10.7475	10.238	10.3602	10.1486	10.1254	10.5962	10.6754	10.7504	10.0294	10.2961	10.8924	10.8493	10.8282	9.91177	10.4126	10.8215	11.0738	10.2095	10.2449	9.87182	8.75416	10.9301	9.76738	10.6584	11.1815	8.90883	10.0381	10.6769	10.1108
ARMCX3	10.5196	10.4447	10.9103	10.6885	9.80477	10.6443	10.7527	10.2575	10.6304	10.6341	10.6714	10.6921	10.5602	10.2636	10.5587	10.2839	9.8908	9.90327	9.76296	10.3707	10.6011	10.6943	10.1048	9.52847	10.4097	10.3887	9.82128	10.4207	10.5215	10.5613	10.7617	10.4213	10.2933	10.7096	10.5213	10.6228	10.8536	10.0735	10.3719	9.72541	8.3904	10.2104	9.37636	9.86629	9.9289	10.7726	9.82555	10.2258	9.54137
ARMCX4	4.93192	5.24769	5.27845	5.54911	4.74995	5.12954	5.48282	5.39659	5.08607	5.13282	5.50936	5.40411	4.98978	5.25542	5.12669	5.39265	5.52424	5.335	5.11984	5.0924	5.27845	5.42038	5.46283	5.31379	5.18457	5.2512	5.52622	5.27143	5.43673	5.21373	5.26438	5.78404	5.41442	5.0966	5.1816	5.88555	5.4969	5.22604	5.1377	5.13274	5.30506	5.16859	5.27845	5.36341	5.29995	5.23573	5.15404	5.2324	4.74345
ARMCX5	6.91601	7.70528	8.47775	8.26917	8.4453	7.92215	8.77995	7.87655	7.83873	7.17355	7.82855	8.07037	7.56654	7.4514	7.69375	8.56255	8.26396	8.05459	8.16629	8.54947	8.25552	8.30341	8.34208	7.75596	8.09258	7.94752	8.54178	8.88066	8.23351	7.7675	7.76984	7.84943	8.10221	7.97189	8.44678	7.98848	8.04276	8.25102	7.99739	7.70458	8.31914	8.62139	8.33139	8.21645	7.93983	8.31666	8.56379	7.01666	7.63997
ARMCX6	9.97155	10.3913	10.7729	11.065	10.3932	10.5315	10.6542	9.99371	10.5416	10.3325	10.3297	10.49	10.4873	10.5683	10.3058	11.1022	10.1596	10.2206	10.6436	10.7059	10.6087	10.7563	10.6531	10.4588	10.2145	11.0891	11.1752	10.8305	10.7093	10.4742	10.149	10.5614	10.8405	10.5384	10.6482	10.5814	10.6271	10.3259	10.5158	10.149	9.96088	10.3547	10.9594	10.636	11.3552	10.9586	10.1735	10.2055	10.1061
ARMH3	6.94572	7.24141	7.08364	7.0952	6.78449	7.04662	6.95457	7.02397	7.15794	7.09271	6.78413	6.87481	7.36525	7.33132	6.94123	7.06886	7.02713	6.7367	7.1109	7.29929	7.02246	7.06975	6.95322	6.92819	6.72436	7.56905	7.73374	7.09645	7.08556	6.85018	6.86229	7.0292	7.22301	7.01137	6.89418	7.15973	7.4266	7.36801	7.21132	7.29304	7.68725	7.55216	7.00514	7.38465	7.45738	7.17844	7.14707	7.1109	6.7476
ARMT1	8.92145	9.6201	9.79763	10.7947	9.84627	10.0182	9.82703	10.3615	9.38521	9.27696	9.39609	9.14125	9.55721	9.83637	9.5184	10.201	8.90085	9.27472	9.66705	9.34821	10.4912	9.71576	9.20982	9.91561	9.54319	9.62996	9.16816	9.57832	9.5782	9.5924	9.7469	9.40433	10.5272	9.29258	8.56136	10.1784	9.36627	9.13076	9.41896	9.58917	9.28577	8.78017	9.4331	9.69621	9.26584	9.84875	9.23981	8.79047	9.14488
ARNT	8.31481	8.37981	8.89963	8.96669	8.66392	8.74713	7.72656	7.65135	8.64098	8.52475	8.49157	8.13159	8.51868	8.44984	8.40153	8.0439	8.37179	8.366	8.34283	8.54113	9.56528	8.66316	8.3824	8.75782	8.28332	8.00676	8.07019	8.76114	8.89435	8.4757	7.8981	8.48905	8.58844	8.71329	8.51363	8.99049	9.2029	8.56393	8.81485	8.00576	7.67087	8.19288	8.33966	8.41508	8.13982	8.24018	8.34178	8.3227	8.03809
ARNT2	6.66612	6.30641	7.92903	7.98965	8.77496	7.65001	9.25793	7.73538	6.87371	7.38892	7.78336	7.88131	6.31188	6.10942	5.70223	8.69803	8.86722	8.83045	8.5124	8.3196	8.42663	7.96723	8.45446	8.02945	8.73811	8.21177	8.30353	8.41298	7.94919	8.19643	8.39822	8.6833	7.30084	8.31022	8.83966	10.0682	10.4058	10.0524	8.04971	7.84445	9.38212	8.23924	7.95784	8.10321	7.69338	7.75138	8.61706	10.1285	8.39468
ARNTL	8.7997	8.41885	7.66246	7.45672	6.67794	8.01949	6.8795	8.16278	8.52622	8.20126	7.89285	8.06078	7.8373	8.55562	8.23316	7.0682	7.46664	6.46937	7.89696	7.1265	6.99751	8.19761	7.15928	6.98302	7.17748	6.96389	7.27807	8.18061	7.89051	8.09417	8.48232	6.72451	6.65303	7.59214	7.43615	8.67613	8.1177	7.56504	7.97893	7.85213	7.18762	7.41963	7.80591	7.13615	6.98573	7.71451	7.23017	7.59799	7.23325
ARNTL2	6.92721	5.55278	5.09414	5.18436	5.49204	5.74096	5.86696	5.34058	5.94117	6.56386	5.08365	5.31331	6.5176	5.34509	5.50371	5.57232	5.33078	6.06727	4.76321	4.83983	5.18108	5.43524	5.00597	4.83171	4.84916	5.76156	5.02212	4.8089	5.20079	5.52844	4.85481	5.22661	6.01771	4.90034	5.01742	6.17989	6.3564	4.81602	4.85144	5.15666	4.86258	4.63475	5.52825	4.9895	5.71846	4.90743	5.63097	5.05771	5.20569
ARPC1A	9.9922	10.0594	10.0083	9.9572	10.7989	10.6061	9.38448	10.1854	10.3423	9.98171	10.2641	9.95675	10.0118	10.0836	9.99687	10.5322	10.3908	10.6782	10.2238	10.2871	10.6628	9.94354	10.1599	10.4828	10.488	9.60579	9.77999	10.9733	10.2598	10.578	10.0432	10.9292	11.6169	10.6701	10.348	10.6372	10.6669	10.5962	10.2103	10.154	10.328	10.2552	10.5482	10.4997	10.3639	9.52699	10.1072	10.5439	10.5619
ARPC1B	12.2703	12.52	10.832	10.1779	9.87071	12.4962	8.78476	10.6639	12.1976	12.4828	11.1151	11.1379	12.345	12.3255	12.4974	9.13601	9.261	9.60222	9.90921	10.1164	9.43468	11.5781	9.70802	8.92726	10.8297	9.92109	8.6421	10.161	11.5433	12.0991	10.194	9.90458	9.4368	10.7615	10.8364	11.9113	11.1168	10.2896	11.573	11.4451	8.86847	9.33168	9.4752	8.29584	7.93507	9.64438	9.23743	10.9766	10.682
ARPC2	13.0604	13.0839	12.1265	11.8931	12.1985	12.8932	12.3836	12.0966	12.8911	13.1301	12.4739	12.3126	13.1827	13.1134	13.0608	11.7047	11.9855	11.8938	11.8754	12.3316	12.2455	12.6982	11.9885	12.0018	12.4764	12.3327	12.2932	12.2488	12.5684	13.0588	12.2367	12.2572	12.0787	12.344	12.3893	12.6231	12.4876	12.347	12.678	12.5926	11.7724	11.8372	11.937	12.0558	11.8353	12.5458	11.7186	12.3615	11.9758
ARPC3	11.8341	12.2349	11.2248	10.94	11.3636	11.7662	11.038	11.3547	12.088	12.2001	11.3416	11.3159	12.283	12.3706	12.2086	12.0265	10.6012	11.2375	11.2481	10.1368	10.6986	11.4469	9.89719	10.7156	11.4643	10.6572	10.9234	10.2505	11.5472	11.435	10.8484	10.8296	11.0218	11.3891	10.2019	10.7323	10.3891	10.8513	11.2141	11.9379	11.2188	10.8714	11.6145	11.2944	11.0239	11.7312	10.8029	11.3796	11.3362
ARPC4	9.09522	9.19233	8.64315	8.91227	8.72509	9.04236	8.64117	8.90988	9.02371	9.33956	8.71868	8.8204	9.36655	9.46044	9.13066	8.76339	8.55913	8.63849	8.87334	8.86433	8.63316	8.88548	8.48239	9.02658	8.59466	9.36937	8.91531	8.62865	8.99446	9.06135	8.98794	8.9768	8.72587	8.73428	8.65563	8.97098	9.07347	8.95267	8.72577	9.06234	8.96403	8.36006	8.75866	8.6452	8.79214	8.56838	8.31918	9.02596	8.39383
ARPC5	11.7864	12.192	11.3632	11.4016	11.1879	11.921	10.7911	11.1664	12.0308	12.0715	11.5359	11.5842	12.1412	12.2812	12.1038	11.8113	10.972	11.292	11.3372	10.9275	11.5434	11.6648	10.8764	11.357	11.4317	10.3941	11.1464	11.0435	11.5886	12.0253	10.7475	10.8234	11.4059	12.1857	11.4606	11.5938	11.9125	11.6344	11.6419	11.6091	10.0169	10.9066	11.3706	11.3982	10.9182	11.4898	10.5865	11.6855	11.2848
ARPC5L	10.2531	9.7412	9.39536	9.63946	10.0318	10.0157	10.5023	9.7178	9.67092	9.79928	9.63978	9.67132	9.62368	9.81508	9.85198	9.40228	9.77257	9.56194	9.60094	9.51132	10.1062	9.57809	9.61743	9.71091	9.5363	10.9689	9.96447	9.8904	9.60816	9.84141	10.1322	9.7052	10.5211	9.57508	9.42553	9.60587	9.38488	9.48108	9.54518	9.51725	9.76587	9.46433	9.54442	9.57463	9.13666	9.88262	9.67966	9.59341	9.66616
ARPIN	5.99317	6.33562	6.48758	7.28133	5.90863	6.29696	6.33522	5.98528	6.13505	6.08203	6.25051	6.13105	6.32709	6.55778	6.38473	5.47344	6.60037	6.03283	5.66054	6.01548	6.02434	5.93293	6.08745	5.87799	6.27704	5.84319	5.5758	6.03649	6.26767	6.08465	6.05327	6.166	5.54838	5.9502	6.06309	6.17334	6.29599	6.18123	6.31592	5.69987	5.67691	5.82616	5.72497	5.82363	5.45195	6.11983	5.93122	5.49039	6.11322
ARPP19	10.6518	10.5164	10.8689	10.8444	10.904	10.5637	10.2697	10.7944	10.5083	10.7922	10.6082	10.4201	10.7072	10.728	10.5653	10.8047	11.0724	11.1726	11.2105	10.5678	10.9135	10.4514	10.5881	10.9268	11.1256	11.3284	10.9057	10.8093	10.7863	10.4922	11.0689	10.9811	10.4119	11.0021	11.0081	10.3663	10.7147	11.392	10.8819	10.9048	11.319	11.355	11.3673	11.3875	10.3906	11.4505	10.8025	11.1827	10.6613
ARPP21	3.75641	3.93873	3.83635	3.94617	3.74636	4.81152	3.76725	3.78126	3.81023	4.12159	3.57206	3.91738	3.92761	3.72557	3.86305	3.99057	3.52293	3.67279	3.56954	3.74919	3.69039	3.64192	3.7397	3.6053	3.6788	3.71776	3.77498	3.69505	3.61012	3.63223	3.53533	3.81314	3.86305	3.68546	3.57284	3.54293	3.46433	3.61522	3.57346	3.62474	3.81106	3.88823	3.67091	3.74919	4.16163	4.28658	3.75692	3.87234	3.88838
ARR3	6.33984	6.18995	6.09288	6.07608	6.55949	6.19695	6.25512	6.38182	6.27795	6.38305	6.29498	6.28198	6.28386	6.30216	6.23015	6.2814	6.20229	6.39444	6.10805	6.21116	6.05294	6.02933	6.30075	6.26073	6.26941	6.23971	6.43536	6.16613	5.95797	6.16166	6.18388	6.27969	6.29533	6.14821	6.08824	5.96687	6.29753	6.27259	5.90813	6.39358	6.51874	6.30024	6.16939	6.46671	6.76423	6.25203	6.30564	6.41302	6.62869
ARRB1	7.28399	8.46419	7.4937	7.07829	7.27028	7.23967	7.32198	6.9151	7.87267	7.92288	7.40942	7.09207	7.91875	7.92108	7.86336	6.79826	6.63605	6.67926	6.76856	7.3804	6.73001	7.44698	7.39633	6.64893	7.30123	6.66796	7.11255	7.04289	7.69545	8.13786	7.07708	7.34274	6.70317	7.27089	7.45708	7.7472	8.47885	7.11122	7.65428	7.47866	7.46878	7.30674	6.78199	6.36672	7.1629	7.05394	6.94951	6.83122	6.86041
ARRB2	6.77572	7.38418	6.18225	6.01453	6.40473	6.07236	6.1512	6.10494	6.93491	7.38284	6.41929	6.54401	7.5939	7.91704	7.18114	5.6183	6.0945	6.05767	5.57085	6.36807	5.7683	6.44727	6.15397	5.96207	6.50022	6.45477	6.08505	5.9662	6.5558	6.70013	6.09538	6.13257	6.25641	6.31868	6.1524	6.09301	6.24713	6.2626	6.74876	6.72756	6.71549	6.07728	5.57621	6.21992	5.94003	6.24963	6.31868	6.8197	6.84245
ARSA	7.11757	6.97474	6.04046	5.71774	5.91722	6.50384	5.70668	6.50975	6.64459	6.76681	5.6724	5.27593	6.65546	7.34669	6.72931	5.83773	5.76251	5.77535	6.03919	5.80069	5.29612	6.0642	5.5983	5.77438	5.99858	6.13247	6.12576	5.67027	5.76251	6.5753	6.11763	5.49732	5.69409	6.01332	5.93809	5.88287	5.57657	5.54373	6.21423	6.38473	5.7797	6.07885	5.81039	5.31636	5.41776	6.03638	5.70539	5.96845	5.71693
ARSB	5.92333	6.26762	4.85516	5.28283	4.93713	5.46028	4.63188	5.82875	5.73227	5.94696	4.64767	4.79957	6.8142	6.57528	6.68394	4.43033	4.44744	4.87912	4.37253	4.61724	4.47821	5.27872	4.26877	4.46445	4.58185	4.50841	4.85516	5.33392	4.83264	5.60536	4.94759	4.5343	4.57832	4.65368	4.60762	4.46536	4.40222	4.36821	4.79025	5.18581	4.33376	4.86398	4.6995	4.50532	5.07084	4.87871	4.61652	4.85933	4.67807
ARSD	6.59761	6.59635	6.4249	6.3676	6.54129	6.33084	6.79412	6.89245	6.8345	6.77944	6.5525	6.68631	6.80972	6.54461	6.74105	6.63781	6.45015	6.59717	6.80482	6.67345	6.62672	6.44946	6.62624	6.83287	6.67172	6.91823	7.09674	6.70601	6.60087	6.41828	7.06022	6.92318	6.58743	6.68393	6.66905	6.79206	6.60843	6.55995	6.44984	6.64756	6.66485	6.56289	6.54709	6.67966	6.65782	6.43775	6.54482	7.02651	6.62053
ARSE	5.26852	4.93059	5.08985	7.58178	5.30949	4.85081	5.12926	8.39838	5.17682	5.04245	5.14389	4.98327	5.36144	5.49741	5.14008	5.60094	4.72627	5.20429	7.57001	4.98522	5.24707	6.37344	4.96616	5.21733	5.07023	5.53116	5.21557	6.02276	6.38342	5.27675	8.50745	5.76891	4.99034	5.01356	5.73663	4.87382	4.93555	5.66197	6.33181	7.86103	5.10049	4.96354	5.36926	4.98217	5.2351	5.05428	5.15363	5.80958	5.27136
ARSF	6.42353	6.43093	6.21377	6.07295	6.3869	5.98252	6.37615	6.93187	6.391	6.53557	6.23267	6.38567	6.54417	6.35956	6.33621	6.36235	6.65733	6.55215	6.9368	6.33454	5.98834	5.84572	6.33454	6.33454	6.22409	6.17407	6.42888	6.29472	6.08524	6.33856	7.24681	6.18269	6.45534	6.46026	5.99945	6.10254	6.01359	6.33061	6.19621	6.79256	6.669	6.34061	6.78205	6.38985	6.7338	6.26038	6.23997	6.03032	6.14544
ARSJ	7.49918	6.09235	6.69557	6.22426	5.64554	6.85874	4.5359	6.60426	5.51592	6.79202	5.23448	5.44645	6.63906	5.34596	5.49513	4.52531	5.29701	4.82789	6.16289	5.32658	5.0598	6.66533	4.83527	4.73733	4.68936	5.06551	6.59455	5.26002	6.75102	6.69164	7.16854	5.03182	5.01493	5.40209	5.35496	5.47544	6.12533	4.9756	5.41144	6.51301	4.71875	5.3784	5.32354	5.06885	5.07253	6.63243	4.6288	5.46404	5.60884
ART1	6.12505	6.32375	6.04144	5.97898	6.11885	5.83796	6.1829	6.07816	6.1733	6.35218	5.85107	5.89199	6.42599	6.35561	6.15588	6.08836	5.78105	5.96678	5.82554	6.2053	6.12155	5.73479	6.26216	6.1829	6.061	6.4341	6.42888	6.01585	5.78894	6.07974	6.12155	5.99269	6.0234	5.94318	5.90145	5.68198	5.88431	6.27809	5.73582	6.18477	6.42539	6.1716	6.32444	6.27189	6.46377	6.11617	6.18664	6.1516	6.50108
ART3	3.57153	3.56274	3.85134	3.42864	3.33115	3.48982	3.39217	3.42864	3.51588	3.52476	3.40266	3.30402	3.53257	3.39352	3.5954	3.26534	3.54383	3.31826	3.29796	3.36346	3.44009	3.04983	3.24662	3.44777	3.50195	3.31493	3.55786	3.28356	3.30375	3.35074	3.38156	3.3629	3.42864	3.36774	3.34295	3.34594	3.27029	3.26662	3.32476	3.66084	3.46838	3.79608	3.59793	3.54701	3.80765	3.88047	3.61049	3.46758	3.54905
ART4	5.46471	4.63301	4.74866	4.24964	4.34582	5.36001	4.31891	5.69785	6.59512	4.52209	5.98265	4.80837	4.52192	5.48974	5.65798	4.48992	4.02896	4.59633	4.31911	4.53457	4.4221	6.02052	4.36435	4.3491	4.28759	4.58097	4.85819	5.60739	5.48716	4.79686	4.33956	5.235	4.27047	4.54423	4.27894	4.24324	4.4212	4.53528	4.74528	4.84446	4.39378	4.26065	3.93239	4.53045	4.85241	4.27193	4.40296	5.15677	4.45285
ARTN	6.30646	6.15325	6.13264	6.6537	6.19958	6.28053	6.42771	6.86961	6.37379	6.39811	6.17632	6.09987	6.21112	6.2208	5.93339	6.44747	6.21491	6.14963	6.6961	6.27964	6.17293	6.04547	6.22612	6.35025	6.21729	6.52355	6.36208	6.20798	6.2852	6.30226	6.89591	6.19456	6.28053	5.89481	6.2224	6.07938	6.21508	6.08935	5.91722	6.63936	6.86445	6.18101	6.66081	6.52837	6.70973	6.24532	6.23617	6.69842	6.22048
ARVCF	7.85227	7.62411	7.59991	7.53811	7.86595	7.40296	7.87524	7.77951	7.90583	8.17016	8.07142	7.76015	7.76185	7.79389	7.67092	7.87526	7.81171	7.91781	7.85012	8.04543	7.73966	7.62655	8.07192	8.08009	7.86966	8.27169	8.25161	7.77666	7.78564	7.84424	8.08001	7.82972	8.04199	7.74331	7.88368	7.66231	7.66233	7.92293	7.5744	7.6077	8.00141	7.66209	7.7044	7.77816	8.01768	7.67018	7.88281	7.83243	7.92248
ASAH1	13.0925	13.7317	12.6387	12.4289	11.0804	12.6315	11.2332	13.2763	13.2746	13.4559	12.9519	12.9101	13.8179	13.9223	13.6889	11.2812	10.9403	10.9055	12.2587	12.2068	11.5121	13.2819	11.6082	11.0927	12.9965	11.6885	11.0396	11.6184	12.9935	13.0314	13.1744	11.1509	10.5373	12.6711	12.3784	12.1597	12.2095	12.6254	13.3456	13.4166	10.1518	11.3788	11.398	11.0807	11.4989	12.4956	10.9244	11.9379	12.3312
ASAP1	9.05517	9.60509	7.98626	8.0143	8.832	9.13276	8.215	7.33266	8.8752	8.73684	8.89768	8.59357	9.51552	9.77454	9.22289	8.16488	8.45088	8.41897	7.23854	8.48858	8.93063	8.24401	8.32172	8.1836	8.25518	7.63166	8.06591	8.85847	7.94223	8.53435	6.47625	8.51731	9.16198	8.95488	8.46925	8.05128	8.58971	8.30952	8.59411	8.4745	8.62514	8.96345	7.20132	8.13304	8.29991	8.52422	8.45051	8.05801	8.37735
ASAP1-IT1	6.53247	5.85485	5.29442	5.70133	5.36982	5.12039	5.21683	5.53216	5.82757	5.61949	6.20575	5.76912	6.22375	6.79552	5.9861	5.30166	5.38244	5.20326	4.83745	5.09429	5.28171	5.91075	5.62564	5.27549	5.56925	5.51232	5.38852	5.26331	5.34628	5.70636	5.14083	5.45933	5.19895	6.01117	5.68966	5.30774	5.75117	6.05489	5.39048	6.12409	5.39738	4.99913	5.21199	6.52389	6.41984	5.42676	5.53069	5.77706	5.76809
ASAP2	9.83083	9.23584	10.2926	9.29369	10.4931	9.40699	10.0561	10.1079	9.56688	8.09251	9.64647	9.78347	8.71468	8.42546	8.52797	9.5028	9.95582	10.1085	10.1521	9.55924	9.89458	9.90152	9.6222	8.9294	9.11595	9.77463	9.62337	9.73902	10.183	9.24039	10.3546	9.64538	9.71476	9.732	9.68047	8.93532	9.509	9.60436	9.82928	9.83454	9.87716	9.34271	9.16618	9.8388	9.4606	9.31548	9.74171	8.51683	9.41771
ASAP3	7.97163	8.06949	8.57293	8.60257	8.16136	8.58881	8.01009	7.99082	8.13143	7.51861	8.2227	8.1157	7.7215	7.4286	7.86461	7.21114	8.05489	7.6274	8.43628	8.49847	7.78831	7.77203	8.2782	8.00665	7.81687	8.30578	8.26597	8.2478	7.95979	8.22384	8.07249	8.11872	8.36183	7.84571	8.26347	8.21895	7.33891	7.95595	8.12105	7.87829	9.01666	8.34087	8.14415	7.81235	8.07249	8.68301	7.87643	7.72751	7.52726
ASB1	7.29809	7.65348	8.36661	7.94605	7.63174	7.9426	8.2229	7.47355	7.627	7.70308	8.01546	8.18552	7.23745	7.55814	7.47767	7.47299	7.99677	8.24786	7.48923	8.09875	7.81987	7.74759	8.20259	7.33334	7.91739	7.99753	7.66146	8.36381	7.68903	7.6695	7.60632	7.70194	7.60203	7.69483	7.9264	7.85647	8.08327	7.89507	7.97611	7.66332	8.26728	8.28734	7.74476	7.68234	7.95505	7.74974	8.0403	7.79475	7.79475
ASB13	7.48596	8.70859	8.61531	8.53293	7.3597	8.53514	8.64206	10.0054	8.33801	7.91669	8.25902	8.36188	8.82354	8.96233	8.30239	8.41063	9.06978	7.76314	9.3215	8.58206	8.20377	8.77944	8.4478	7.29832	8.66678	8.45239	7.19608	8.33841	8.59873	8.46693	8.95266	8.10109	8.95204	7.9496	8.61082	9.33459	9.1835	8.57979	8.76188	9.36418	8.91445	9.08896	9.14477	7.25893	7.68326	8.44651	8.8666	9.25034	7.16435
ASB4	4.77084	4.48913	4.51736	4.56459	4.60681	4.49218	4.58229	4.51736	4.55214	4.6361	4.43486	4.49331	4.65139	4.49559	4.50196	4.6978	4.67668	4.47156	4.58285	4.52615	4.55379	4.45468	4.51736	5.01231	4.38435	4.32839	4.55017	4.43957	4.33245	4.17259	4.46262	4.52687	4.43642	4.38839	4.26184	4.36453	4.51736	4.30703	4.38606	4.57936	4.99661	4.49047	4.85615	4.79634	5.01978	4.50575	4.68441	4.66396	4.4886
ASB6	7.16815	6.9573	6.90786	6.82896	6.85427	7.17417	7.4078	6.74121	6.95153	7.05413	6.8004	6.85046	7.027	7.01513	6.81224	6.77227	6.91431	6.97538	7.21884	7.18874	7.13298	6.84198	7.05747	7.01085	7.02767	7.35426	7.26778	7.29767	6.97329	7.20422	7.21486	7.14001	7.52878	6.83953	6.95711	7.01919	7.26031	7.06862	6.84318	7.17985	7.27735	6.98053	6.7966	6.75702	7.12337	7.05747	7.12728	7.13542	6.77852
ASB7	5.80389	5.75339	5.61036	5.5581	6.02387	5.73905	6.33759	5.91724	5.92575	6.05179	5.69579	5.5171	5.69286	5.77286	5.87447	5.61398	6.17989	6.17553	5.79795	6.24869	5.67571	5.90155	6.03318	6.08714	5.86332	5.75607	6.465	6.05421	5.72075	5.91902	5.81285	6.20948	5.88798	6.06013	5.66458	5.447	5.4101	6.08068	5.62299	5.69337	6.13786	5.94156	5.86363	5.45014	6.28299	6.16072	5.66264	5.96767	5.7809
ASB8	7.67807	8.62447	8.87052	8.6428	7.96286	8.75855	7.70359	8.67288	8.4143	8.51269	8.31759	8.07692	8.37014	8.63153	8.24016	7.77382	8.15583	8.27419	8.62303	8.40855	8.36816	8.46631	8.07613	8.52549	8.60441	7.67242	7.81848	8.24682	8.26187	8.2703	8.49647	8.22331	8.11454	8.34228	8.21832	8.53957	8.77803	8.42891	8.33872	8.29987	7.86051	8.29186	8.33763	6.85892	6.50976	8.17133	7.96863	8.32339	7.39496
ASB9	5.05692	5.17412	5.95082	5.73093	4.75098	5.45599	5.30774	7.60142	5.3819	4.88934	5.09641	4.79467	5.16476	4.73527	5.02618	5.22544	5.13561	4.73142	6.92468	5.1514	4.8929	5.27998	5.33149	5.16105	5.19529	5.13036	5.17412	5.07907	5.07513	5.18608	7.34469	5.90224	6.0203	4.77361	5.39861	5.29353	4.727	4.62878	5.53985	6.11412	4.88421	5.96541	6.65801	4.92763	4.88905	4.95574	5.13807	4.74053	4.73563
ASCC1	7.16477	7.6561	7.87758	7.57519	8.15611	8.23993	8.40441	7.61333	7.34662	7.03617	7.38593	7.59572	7.42935	7.44463	7.54208	8.74022	7.78383	7.69472	7.64726	8.07217	7.99311	7.67332	7.86433	7.98618	7.73152	8.0847	8.75057	8.36125	7.66739	7.73128	7.43754	8.23104	8.85231	7.61855	7.80079	8.15819	8.06943	8.11126	7.8799	7.21906	8.02019	7.82705	8.46581	7.6819	8.14574	8.18165	7.68996	7.22316	7.66144
ASCC2	7.15267	7.03325	6.79211	6.84175	7.02291	6.92259	6.76564	6.91848	7.12807	7.09249	6.60997	6.81369	7.10991	7.22606	7.21077	6.24588	6.842	6.62029	7.16103	7.17056	7.13738	7.06592	7.10512	7.30793	6.73793	7.90151	7.25767	6.45254	7.08615	6.65902	7.26927	6.63271	6.88353	6.73169	6.75658	7.29037	6.78213	6.6246	7.32938	7.34163	7.18534	6.74179	6.81113	6.81234	7.01363	6.9827	7.17505	6.98465	6.5107
ASCC3	8.28483	8.20273	7.63059	7.99744	8.02171	9.12573	8.04703	6.99318	7.69983	7.90978	7.08647	7.53699	8.2433	7.28777	8.69653	7.49122	7.65499	7.6604	6.74077	7.97167	8.5365	7.64549	7.39189	8.1819	7.50641	7.25949	8.07523	8.16483	7.43051	8.36358	6.6387	7.79832	8.17456	7.10625	7.48808	7.90578	7.89285	6.80936	7.72718	7.18699	6.83822	7.70309	6.6044	8.20952	7.50935	8.42129	7.68466	6.99518	7.4528
ASCL1	5.89292	5.98329	5.63781	5.91891	5.84938	5.67056	5.838	6.05833	5.9851	6.12354	5.84016	5.60556	5.86569	5.81989	5.97644	5.73468	5.63901	5.81052	5.80947	5.66883	5.61238	5.69519	5.71753	5.63651	5.54174	5.93977	5.75449	5.54802	5.63859	5.74038	5.81352	5.72611	5.63452	5.77414	5.47632	5.51512	5.69967	5.56191	5.50743	6.00926	6.49679	6.0445	6.02469	6.38551	6.91755	5.95462	5.97391	6.17128	6.10012
ASCL2	3.6302	3.63372	3.54281	3.49533	3.67234	3.49545	3.74261	3.76753	3.65402	3.62968	3.64718	3.86055	3.74351	3.57398	3.63837	3.7	3.74999	3.72814	3.46951	3.64105	3.56845	3.33759	3.58649	3.52781	3.5422	3.52732	3.53518	3.53038	3.50423	3.54281	3.54866	3.53412	3.5158	3.5167	3.49453	3.48205	3.40355	3.55984	3.36268	3.35279	3.48187	3.367	3.40369	3.47427	3.46363	3.32965	3.46783	3.35062	3.37897
ASCL3	5.58395	5.64189	5.10135	5.19606	5.14027	5.26809	5.27969	5.55957	5.63947	5.63494	5.27969	5.10697	5.47316	5.62632	5.38401	4.98588	5.06249	5.10671	5.26007	5.02444	4.83546	5.20797	5.02074	5.24645	5.08896	5.40223	4.94968	4.8924	5.07728	5.40724	5.67962	5.10067	4.87855	5.04656	4.80946	4.72027	5.15676	5.16064	4.87199	5.65889	5.68027	5.46436	5.29111	5.64588	5.91061	5.29548	5.21685	6.1306	6.45628
ASF1A	8.18781	9.2051	10.1717	10.3946	9.66543	9.19292	9.74992	9.08671	9.06824	8.24119	9.63683	9.31772	8.90608	8.80494	9.16501	10.0764	9.66695	9.51124	9.70714	9.91126	11.2741	9.44896	9.69151	10.0303	10.6694	9.33521	9.97007	9.75391	9.69735	9.17791	8.63791	10.0466	9.80413	9.55344	9.77168	9.50793	9.89478	9.85886	9.74113	9.50303	9.82327	10.3313	10.3278	9.87276	9.95028	9.5536	9.82864	8.76697	8.97437
ASF1B	7.1577	7.00852	6.21888	6.61344	7.87281	6.9111	7.79233	6.67304	6.52606	6.84681	6.86576	7.07633	7.05168	6.70566	6.63474	7.26511	7.44063	7.50956	7.17858	6.92847	7.93854	6.15344	6.95622	7.75281	6.82361	7.71834	7.53745	7.5389	6.64872	6.76325	6.54322	7.39427	7.71152	6.57372	6.76773	6.55208	6.78843	6.77206	6.92706	6.87282	7.7625	7.35682	7.60503	7.9264	7.80708	7.26967	7.82585	7.00523	8.17985
ASGR1	6.53164	7.25089	6.33801	6.11558	5.98264	6.62122	6.45965	6.17117	7.22494	7.41606	6.39844	6.51376	7.03205	8.18801	7.14628	6.19249	6.40436	6.46864	5.89658	6.68832	5.87639	6.36379	6.61085	5.78613	6.40611	6.07355	6.44191	6.27368	6.28955	6.87865	5.9203	5.85625	6.00132	6.58315	6.15097	6.336	5.87982	5.92343	6.56534	6.23481	6.41793	6.39844	6.41701	5.96189	6.48387	6.91258	6.41239	6.07768	6.30469
ASGR2	6.51174	7.00624	6.10554	6.06985	6.2219	6.31955	6.06523	6.84312	6.75734	6.92474	6.26435	6.47548	6.81646	7.145	6.62065	6.17678	5.92792	5.98769	6.48909	6.39977	6.2215	6.35912	6.2049	6.52438	6.29358	6.38721	6.57488	6.13689	6.36643	6.72857	6.9411	6.3297	6.23215	6.21826	6.29421	6.40211	6.19338	6.3658	6.43623	6.68632	6.36537	6.32553	6.21652	6.17705	6.26113	6.23685	6.00299	6.68285	6.33824
ASH1L	6.69056	6.82851	6.84353	6.92588	7.17452	6.98786	6.65103	6.82425	6.87596	6.61227	6.86377	6.60928	6.65616	6.84648	6.5755	6.58931	7.77707	7.10954	6.65398	6.71005	6.6669	6.99646	6.70913	7.0909	6.73094	5.95782	6.65036	6.57673	6.77275	6.86499	6.75804	6.94525	7.09033	7.03958	6.87417	6.90744	7.48339	7.26882	6.62955	7.1216	6.48436	7.03934	6.94377	7.01992	5.9851	6.81051	7.14278	6.82813	6.83362
ASH2L	9.06369	9.20979	9.6293	9.31594	9.58535	9.67501	9.50061	9.29014	9.23893	8.96079	9.35857	9.2322	9.11191	9.0576	9.13713	9.65828	9.78814	9.43434	9.36773	9.65667	9.74654	9.28185	9.48006	9.45566	9.48182	9.4351	9.78908	9.81161	9.40883	9.24175	8.94732	10.0464	9.73315	10.5321	9.53536	9.18252	9.77563	10.3136	9.40215	9.02175	9.54208	9.65101	9.76904	9.47097	9.58521	9.447	9.41533	9.38716	9.25772
ASIC1	6.15203	6.1228	6.36197	6.33521	6.15078	6.18442	6.33764	6.20778	6.21328	6.40334	6.23367	6.50025	6.22936	6.07031	5.78352	5.98431	5.87715	6.52819	6.39818	6.4157	5.85291	5.71226	6.51178	6.58029	6.17128	5.97386	6.50384	6.04806	6.25421	6.15738	5.9956	6.3998	6.44107	6.38776	6.234	5.81902	5.92328	6.19361	5.94833	5.83625	6.73583	6.44636	6.65615	6.21879	6.81809	7.11388	6.66017	6.1642	6.4878
ASIC2	5.67469	5.65282	5.75248	5.24735	5.70831	5.42197	5.39968	5.48541	5.38267	5.36619	5.25594	5.27277	5.29874	5.49376	5.40932	5.75442	5.1614	5.92654	5.464	5.45805	6.25236	5.19421	5.48592	5.42029	5.77048	5.31695	5.9866	5.62281	5.22641	5.57882	5.61258	5.47004	5.69053	5.32611	5.51106	6.41051	4.84069	5.51106	5.05628	5.61585	5.7304	5.32257	6.04658	7.34102	5.77326	5.45881	5.1642	5.06048	5.34449
ASIC4	5.60982	5.59823	5.28224	5.18868	5.278	5.28091	5.38573	5.8138	5.58193	5.69467	5.36566	5.42472	5.45335	5.61007	5.51606	5.34799	5.26473	5.40264	5.85375	5.44649	5.27954	5.21443	5.18646	5.58676	5.35905	5.59562	5.6566	5.49826	5.26965	5.40644	5.98224	5.40869	5.35133	5.44667	5.40793	5.16709	5.37464	5.36095	5.10339	5.47664	5.44937	5.18915	5.28127	5.42962	5.94473	5.35136	5.39318	5.47788	5.61618
ASIP	5.71024	5.67758	5.03107	5.11329	4.92606	5.67212	5.71508	5.53252	5.62824	5.50299	5.33066	5.26712	5.58794	5.6267	5.81037	5.39938	5.48204	5.24964	5.28172	5.16217	4.92178	5.40539	5.39154	5.22979	5.10905	5.01097	5.48807	5.09756	4.99526	5.17868	5.31177	4.99518	5.22801	4.99657	5.14235	5.16916	4.89504	5.1638	4.99526	5.08874	5.08657	4.9366	5.04441	5.22062	5.78234	5.17821	4.88585	5.26712	5.42506
ASL	7.5666	7.36663	7.0682	6.79688	7.24204	6.86796	6.34776	8.83974	7.22123	7.04113	6.72055	6.93397	7.4506	7.31349	7.19217	7.43539	6.70184	6.80058	8.01793	7.06161	6.20715	7.38402	6.66448	7.20747	6.78667	6.24737	6.58548	6.92229	7.3771	7.10461	8.73848	6.68879	6.27476	7.0121	6.83705	7.03374	7.43696	7.1639	7.08952	8.22068	7.09803	7.09617	7.30977	6.73062	6.34725	7.22742	6.67932	6.66397	7.29424
ASMT	4.90026	4.64778	4.56501	4.69608	4.89925	4.59503	4.73895	5.07604	4.76645	4.89011	4.67776	4.6214	4.84156	4.84627	4.8417	4.96357	4.69681	4.64383	4.798	4.54679	4.66193	4.73943	4.84307	4.81565	4.67698	4.73895	4.78625	4.6031	4.62053	4.82454	4.84271	4.54874	4.79072	4.56787	4.47537	4.50187	4.60483	4.60031	4.51561	4.73895	4.86076	4.86732	4.83456	4.76471	5.33724	4.72886	4.69486	4.97263	4.74729
ASMTL	9.55194	9.54347	9.90806	9.31433	10.1332	9.2247	9.138	9.6374	9.40583	9.06569	9.53989	9.55225	9.5458	9.35148	9.254	9.80236	9.97295	9.41369	9.89439	10.3259	9.43275	9.70979	10.1303	9.64155	9.6838	9.58203	10.5235	10.3128	10.1956	8.95261	9.56577	10.1975	8.21397	9.29823	10.1231	10.5595	10.6028	11.0678	10.4439	9.33073	9.84055	10.2104	9.95555	8.0154	7.76843	9.97393	9.98566	10.5349	8.86122
ASMTL-AS1	4.73637	4.64135	4.65583	4.49622	4.93124	4.4863	4.93714	4.90754	4.75145	4.80346	4.66174	4.5988	4.85392	4.80654	4.81679	5.12606	4.77971	4.76783	4.87965	4.59089	4.35594	4.23156	4.71711	4.66825	4.76867	4.83209	5.02427	4.73589	4.65139	4.7403	4.6	4.48209	4.77313	4.63965	4.51741	4.6321	4.62933	4.67937	4.51438	4.78735	4.64038	4.70143	4.9406	4.97371	4.62558	4.67659	4.66429	4.90533	4.84504
ASNA1	7.54407	7.59714	7.51803	7.28528	7.80647	7.49237	7.43939	7.92337	7.7484	7.53431	7.30849	7.36874	7.65465	7.63485	7.58488	8.1293	7.70643	7.78907	7.59483	7.7584	7.67394	7.0416	7.26752	7.36983	7.39543	7.26639	7.83719	8.06606	7.14268	7.55645	7.59916	7.65438	7.23662	7.14956	7.43991	7.30961	7.46834	7.86212	7.16424	7.45151	8.04766	7.7518	8.40754	7.81483	7.5467	7.87695	8.13722	8.13066	7.96535
ASNS	7.49168	7.69503	8.67868	8.45111	9.94653	9.731	9.68581	7.32203	7.88903	7.70339	8.49031	9.30172	6.84152	6.83701	7.61014	9.25785	9.10404	9.32807	8.10533	8.58217	9.62113	8.50408	9.42805	9.2909	8.88076	9.47677	8.57555	9.20606	8.66812	8.57947	7.34691	9.18343	10.6835	9.17263	8.81027	8.55874	8.61673	9.24825	8.61721	7.9085	9.80274	9.30702	9.18466	9.28069	8.93218	8.73123	9.38585	7.53617	9.87357
ASNSD1	10.0472	9.98807	10.565	10.1271	10.6317	10.2249	10.6738	9.80027	10.3743	9.87138	10.3341	10.4416	9.69193	9.9866	9.90691	11.217	10.3452	10.4951	10.7093	10.3531	10.405	10.1734	10.6565	10.6147	10.4358	10.5439	10.7851	10.4691	10.4043	10.2935	9.96796	10.5182	10.8568	10.3346	10.1407	10.1091	10.1159	10.4144	10.295	10.0316	10.5716	10.2524	11.2588	10.0524	10.6329	10.009	10.5325	9.23991	10.4275
ASPA	6.82215	6.75997	5.25213	7.95921	5.09752	6.47327	4.40205	9.69304	7.01047	4.31358	7.23535	6.56981	5.52394	4.99846	6.82874	4.75355	4.16974	4.50249	8.43827	5.49041	3.81195	6.88029	4.58888	4.25404	4.66988	4.69615	4.8181	5.34607	6.36643	6.28743	9.63029	5.52237	4.62688	5.88827	4.69533	5.24099	4.8881	3.9322	6.3163	8.5803	4.33087	4.44212	5.20663	5.36526	4.29132	6.72842	5.08059	6.07976	4.99117
ASPH	10.6491	10.5385	10.1454	10.1071	8.66459	10.3844	8.87933	9.67831	10.3656	10.3398	8.90673	8.88999	10.4817	9.66065	9.80556	9.4539	8.80258	8.30525	9.71509	8.67857	9.31211	9.87368	8.25976	7.99973	8.85832	8.52643	7.99994	8.83472	9.49077	10.6252	9.50607	8.3637	8.70387	8.63549	9.45455	10.6842	9.39943	9.84533	9.34895	9.28786	8.5867	8.37573	9.05674	8.66058	8.49523	10.0577	8.77482	9.51001	8.61863
ASPHD1	5.44258	5.65282	5.23996	5.1515	5.39513	5.50238	5.87262	5.61585	5.45204	5.595	5.37846	5.37509	6.30213	5.39485	5.47254	5.5673	5.70197	5.55066	5.76417	5.66241	5.60109	5.82035	5.64665	5.52852	5.44928	6.57565	5.73319	5.61376	5.65456	7.56535	5.72793	5.8214	5.53965	8.07987	6.28807	6.41384	5.48677	5.78889	5.49746	5.56292	9.20292	5.80607	5.78873	5.51288	5.39546	5.71177	5.87716	5.63259	5.48489
ASPM	6.40409	6.97631	5.30911	7.38946	10.6896	8.83834	9.34796	5.2932	6.06104	6.93084	7.39282	7.63286	4.99097	4.56452	5.89748	9.00176	8.96134	10.7967	7.54227	7.30093	9.46556	5.26017	7.56958	10.6377	6.90503	10.1372	10.0284	8.25392	6.44767	7.89838	4.50991	9.00666	10.6938	7.5044	6.9381	6.09057	5.72947	5.63039	7.79125	5.13563	8.97833	7.48067	8.54174	10.8015	9.43774	8.1503	9.17653	3.92675	10.3928
ASPN	12.0123	9.42772	13.4647	11.587	10.1737	13.3855	5.38363	9.91859	11.9846	11.2358	11.1037	10.8522	11.2041	10.0399	12.1032	7.10393	4.91501	10.3557	9.71266	11.0396	12.4005	11.7254	10.7759	4.073	11.13	9.82343	9.03209	11.344	12.5288	9.79659	9.03538	10.2876	8.55088	10.261	11.3545	8.14688	8.45081	10.9655	10.571	10.5993	4.67592	4.41733	10.7277	9.41647	7.87888	9.81659	10.8679	8.55465	5.1231
ASPSCR1	6.19237	6.55331	6.52844	6.49509	6.79051	6.51586	6.70281	6.67264	6.06829	5.99242	6.32129	6.20379	6.30104	6.45914	6.45636	6.36018	6.65102	6.32613	6.46298	6.54951	6.38051	6.32355	6.50047	6.63222	6.51782	7.62289	6.80443	6.75774	6.21505	6.13218	6.49159	6.63172	6.3384	6.18273	6.40129	6.3778	6.81525	6.42593	6.58142	6.51143	6.65173	6.30024	6.6724	6.15592	5.57439	6.94977	6.82587	6.49917	6.16
ASRGL1	7.99384	9.08091	8.04234	8.88159	9.17694	8.0453	9.9444	10.4009	8.49852	8.41197	8.51466	8.7245	8.62647	9.36682	8.69528	9.66243	8.4944	8.93289	9.12684	8.34465	9.09246	8.98576	8.35737	8.70822	8.84324	9.65001	8.76805	9.12665	8.89379	8.43624	10.0209	9.01742	9.38161	8.61183	8.06245	7.9081	7.46376	7.64959	8.85907	8.91758	10.3867	7.88241	8.71351	8.89523	8.30078	8.52328	8.77762	8.31351	8.15753
ASS1	8.29985	8.34587	8.8695	9.83846	7.07568	10.092	7.8282	13.6766	8.66705	8.1758	8.24061	7.50402	8.55381	7.20689	7.58791	8.78483	7.38547	7.64241	12.2045	7.69928	8.26537	8.81005	7.45021	6.75419	9.28042	8.26425	7.61434	7.78705	8.74065	9.72362	13.2218	7.31206	8.03309	7.31966	9.79398	12.1123	12.0247	11.2958	9.97823	13.124	8.85194	8.06957	9.27177	6.07776	6.52791	10.5795	8.33633	11.911	7.79873
ASTE1	6.87854	7.46579	8.17606	7.94015	7.79484	7.47557	7.32391	7.43705	7.56802	7.75239	8.00815	7.83415	7.24627	7.68041	7.52499	7.99102	8.05283	7.58235	7.61861	8.09746	7.71667	7.82645	8.05255	8.29506	7.37595	7.7552	7.66503	8.34434	7.93497	7.63299	7.17075	7.9524	7.8867	7.86436	7.75789	7.82601	8.61584	8.18101	7.78307	7.45513	7.69517	7.91576	8.01267	7.38331	7.87749	7.45261	7.94304	7.88116	7.24714
ASTN1	4.31161	4.23337	6.62195	4.56916	5.10259	4.44242	4.68625	4.41782	4.08415	4.68175	4.78321	5.47919	4.28461	4.30253	4.21768	4.1607	3.9539	7.06759	4.90883	7.58241	5.52625	3.9358	6.76315	4.64712	4.99281	6.28095	4.26176	8.53798	4.11176	5.12916	4.12444	6.40613	6.37498	8.33912	5.62647	7.12229	9.54974	8.12709	4.59171	4.51964	5.1831	5.26668	4.41782	5.69952	4.51454	4.7798	4.41347	8.07732	4.50808
ASTN2	7.37812	6.76123	7.68611	7.01765	8.63258	7.51786	9.01223	6.9404	6.57265	6.13975	7.11068	6.88915	6.70902	6.34485	6.81178	10.5292	8.24879	7.41239	7.36668	7.18009	8.55523	6.89375	6.99908	7.77643	7.21413	8.03092	7.92342	7.07153	7.03118	6.84168	7.15064	7.2053	7.51069	7.63127	7.10896	6.80303	7.51409	6.81988	7.21616	6.60903	7.21143	6.71613	7.37931	6.87207	9.23214	6.95345	6.84908	6.84671	6.98051
ASXL1	8.3441	8.12157	9.41862	8.74537	8.81467	8.91428	9.11403	7.98942	8.58105	8.17893	8.67581	9.0199	7.77178	8.03052	8.51025	8.30365	8.96226	9.04639	8.68776	9.00289	8.86756	8.40744	9.14405	9.15305	8.48403	8.25515	9.01483	9.081	8.65679	8.57769	8.36592	9.2387	9.0109	8.508	8.92357	8.66977	8.49014	9.23277	8.74332	8.16673	8.69431	8.7713	8.30926	8.5722	8.36635	8.51011	8.7604	7.87989	8.76337
ASXL2	8.34137	8.58132	8.40396	8.28218	8.32193	8.81952	8.07404	8.35245	8.30814	8.32144	8.41324	8.34599	8.80742	8.90126	8.60735	7.87028	8.52024	8.19673	8.52631	8.55595	8.76551	8.80427	8.48672	7.8076	8.34958	8.43001	8.20067	8.55661	8.56526	8.56533	8.53329	8.20937	8.41892	8.58732	8.68152	8.65473	8.94394	8.62166	8.6	8.69956	8.06812	8.45433	7.53063	7.70984	8.14741	8.74314	8.4367	8.47898	7.44996
ATAD2	7.35742	7.79138	7.924	8.18291	9.82773	8.89363	9.13145	6.57411	7.51321	7.33663	8.09737	8.65506	6.5219	6.90024	7.44673	8.7822	9.83578	9.28013	7.75217	8.23314	9.4666	7.07645	8.21045	9.49194	7.48325	8.90501	9.44572	8.85417	7.47376	7.26671	5.74388	9.14883	10.3999	8.03759	7.39595	7.52628	7.07646	7.09094	7.67661	6.11081	8.41937	8.29175	8.19608	9.00586	8.79572	8.75945	8.97058	6.35773	9.00355
ATAD2B	7.34258	7.45295	8.48796	8.68573	9.01171	8.52975	8.83178	6.867	7.82717	7.7899	8.55108	8.5948	7.28381	7.78367	8.2487	8.51768	8.76994	8.86924	7.68289	8.63086	8.65726	8.23028	8.83115	8.13667	8.08315	8.18513	8.47225	9.01788	8.16192	7.85138	7.13396	8.74693	8.69268	8.70672	8.14281	7.97622	8.18943	8.21287	8.16234	7.22141	7.87929	7.98586	7.7331	8.84819	8.35642	7.94696	8.48253	6.8675	8.11359
ATAD5	6.30399	6.25293	6.42643	6.49742	8.20204	7.05614	7.68824	6.0491	6.17318	6.52421	7.02999	7.27792	6.24656	6.57964	6.32046	7.09234	8.03519	7.96971	6.09236	7.07369	7.76902	6.11668	7.27034	7.85664	6.76733	7.19921	7.28692	6.81417	6.26429	6.25484	5.80879	7.66735	7.77955	6.85303	6.67389	6.04669	6.24711	6.15097	6.70366	6.33499	7.96353	6.84011	7.15707	8.16323	6.79508	6.5911	7.8065	6.21021	7.51561
ATAT1	5.85581	5.83617	6.18509	6.82838	6.52973	6.34789	6.72678	6.16695	5.99073	6.07151	6.27402	6.72254	5.98736	6.17861	5.84079	6.80279	6.95469	6.68098	6.54587	6.8896	6.44111	5.81431	7.30077	7.30957	7.10505	7.51688	6.99338	6.71642	6.17579	6.08418	6.26096	7.17549	7.37627	7.01445	6.38381	6.32155	6.17862	6.49886	6.31127	5.69179	7.15861	6.96597	6.45451	7.14261	6.6941	6.51862	6.8987	6.59525	6.7269
ATF1	9.79795	9.94658	10.3406	9.7028	9.68275	10.1149	10.005	9.36997	10.0072	9.95546	10.1064	9.90804	9.75818	10.0165	10.0485	10.7399	9.84863	9.98785	10.5742	10.1478	9.8729	10.0998	10.2314	10.5959	10.466	8.94186	10.1098	9.79204	10.2186	9.85311	9.5112	9.73761	9.89027	10.5933	10.1695	10.4816	10.7075	10.1338	10.0457	9.96124	9.78145	10.4325	10.5918	9.79696	10.0594	10.1293	9.71742	9.96437	9.9558
ATF2	10.125	10.1802	10.9973	10.5187	10.9372	10.6001	10.4802	9.84462	10.1541	10.0123	10.6472	10.4435	10.1509	10.2448	10.1155	11.015	10.7319	10.4586	11.0036	10.8903	10.8882	10.5583	10.9592	10.9066	10.833	10.6714	10.7654	10.6454	10.7285	10.2315	10.1281	10.9752	10.8685	11.0545	10.8389	10.7987	11.0242	11.1545	11.0089	10.3093	11.0554	11.0525	11.167	11.0034	10.9829	10.7637	10.7561	10.5643	10.8461
ATF3	11.3373	10.5463	7.67322	8.35875	7.35692	9.88876	7.77292	9.13014	11.77	11.6171	8.46624	11.2643	11.6243	10.0961	12.4214	7.38567	7.57417	6.88577	11.9766	10.8112	10.0858	11.3642	8.00674	8.30932	10.471	8.56482	8.96358	9.13025	12.3505	12.0554	11.7624	7.77797	6.6785	12.1592	10.0947	11.8177	8.69439	8.23317	11.1552	10.3263	6.1797	10.9311	5.7436	6.82725	6.85403	10.6735	6.63091	11.4589	9.38002
ATF4	11.7655	11.1448	11.4127	11.5791	11.4137	11.3891	11.7342	10.9411	11.6069	11.1127	11.43	11.5856	10.8907	11.0733	11.3733	11.4441	10.9796	11.5134	11.2421	11.5632	11.4018	11.4171	11.1158	11.2198	11.0283	11.1679	11.5603	10.7044	11.6933	11.0531	11.5454	10.9029	10.5703	11.481	11.4874	11.327	10.6005	11.1044	11.3387	11.2666	11.7365	11.1034	11.415	10.9542	11.1166	11.2559	11.2693	11.3177	10.9531
ATF5	7.96611	8.81929	7.81755	7.77107	7.75583	8.89049	7.65662	7.7867	9.03729	9.10881	7.57067	8.02291	9.00919	9.29877	8.8295	7.49249	7.86458	7.49943	8.08082	7.71342	7.73059	8.07228	7.76744	7.63243	8.23708	8.19366	7.92649	7.97013	8.20456	8.46324	8.12651	7.67139	7.45191	8.03289	7.95127	8.2569	8.29716	9.13492	8.75267	7.87696	8.83571	7.61148	7.75689	6.75964	7.50284	10.0064	7.43825	8.02272	7.25101
ATF6	8.97894	8.9178	8.34029	8.50943	8.79137	9.11783	8.58583	8.79369	8.55294	9.20625	8.1173	8.51992	9.02505	8.96786	8.9035	8.23687	9.03999	8.70307	8.43899	8.27233	9.1367	8.47538	8.09085	8.89704	8.35835	8.56975	8.64472	8.3617	8.48975	8.64254	8.61902	8.58315	8.88681	8.30698	8.19719	8.27424	8.30114	8.24612	8.1583	8.47804	7.56276	8.53808	8.12268	8.65671	8.3798	8.83471	8.31019	8.43267	8.34231
ATF6B	7.60939	7.84386	7.86257	7.88765	7.97314	7.74945	7.44118	7.71999	7.84526	7.86667	7.62368	7.68995	8.00685	8.13479	7.94192	7.89916	7.62543	7.44279	7.83993	7.89923	7.88382	7.79408	8.0653	8.50405	8.31372	7.94524	8.29852	8.11051	7.84399	7.88675	7.58047	7.92115	8.16718	7.78682	7.9261	8.11251	8.25134	7.78166	8.20445	7.88765	7.82855	7.90537	8.1236	6.72026	7.30737	7.94004	7.98906	7.99766	7.39012
ATF7	4.79621	4.6626	4.69816	4.74595	4.67244	4.65075	4.5693	4.69419	4.90403	4.62622	4.64852	4.76682	4.79227	4.76989	4.59724	4.90214	4.66369	4.72798	4.54817	4.73758	4.50644	4.46192	4.91754	4.86779	4.68662	4.67244	4.78286	4.63532	4.44412	4.52221	4.67962	4.60248	4.6277	4.4257	4.50402	4.52924	4.5997	4.63829	4.35442	4.72263	4.63979	4.79876	4.73234	4.75231	5.0214	4.49008	4.68576	4.46073	4.64385
ATF7IP	8.07025	8.71391	8.55425	8.74439	9.41424	8.88612	8.81899	7.27481	8.51811	8.13295	9.23477	9.06231	8.47995	8.78901	8.59817	8.81893	9.1582	9.22139	8.6363	9.29067	9.77657	8.5603	8.98857	8.81387	9.79763	9.1401	8.95778	9.44578	8.33408	8.77942	7.98521	9.73375	9.22052	9.40793	8.92997	8.94076	8.98436	8.74372	8.8936	8.96168	8.01575	9.38541	8.43074	8.19398	8.19265	8.65566	8.95401	8.66102	8.07301
ATF7IP2	6.69747	7.16863	7.56921	7.50954	8.04503	6.378	9.40423	6.84544	7.03679	7.24994	7.86487	7.80304	6.57483	7.29698	7.90764	8.0837	6.52343	7.88363	7.83946	7.98574	7.92854	6.91047	8.24568	7.975	6.54938	7.52006	8.59469	7.88313	7.36475	7.41406	6.84551	7.57472	8.27936	7.75193	7.69346	7.66356	6.589	7.33992	8.09379	6.98099	6.81493	8.38947	8.1103	7.69141	7.09917	7.58485	8.36829	7.06015	7.53411
ATG10	5.96537	6.25199	6.08771	6.02718	6.11865	5.82769	6.15322	6.19138	5.9707	6.46518	5.81763	6.0335	6.12313	6.26598	5.94599	6.27022	6.2217	6.03086	5.68554	6.01468	5.77494	5.67476	5.98345	6.08259	5.69749	5.94685	6.25307	5.88969	5.72996	6.04922	5.74136	5.92335	6.04252	5.87858	5.9214	5.58236	5.84357	5.90294	5.79724	5.90639	6.47018	6.70562	6.29081	6.1913	6.82144	6.43871	6.3053	6.42578	6.70157
ATG101	10.0176	8.47567	8.55049	8.32229	8.52734	9.0464	9.07263	8.21917	8.81561	9.5575	8.53077	8.80733	8.95827	8.42928	9.52251	8.67557	8.34446	8.67404	8.72832	8.93326	8.93922	8.66431	8.45877	8.65431	9.04119	8.77627	8.65335	8.96221	9.03116	9.17507	9.17158	8.5009	8.62181	9.18091	8.82398	8.847	8.91666	8.79318	8.65859	8.31135	7.99566	8.60133	8.6075	8.14343	8.03159	9.40706	8.55616	8.80624	7.88775
ATG12	9.99323	9.92838	9.9456	9.96735	9.77572	9.91192	9.58018	9.28077	10.2539	9.72952	10.0981	10.0503	9.79785	10.3752	9.77063	9.95986	9.41544	9.9531	9.26642	9.46589	9.53859	9.78093	9.93337	9.69059	9.38255	8.74809	9.47724	10.0464	9.72437	9.73874	8.43002	10.1129	9.44982	9.53703	9.24336	9.49133	9.41986	9.38465	9.58918	9.35697	9.21387	9.33194	9.64037	9.51147	9.54908	9.49433	9.44767	8.31133	9.71862
ATG13	7.74026	7.69988	7.66093	7.98979	7.95381	7.55027	8.05779	7.99793	7.68037	7.48219	7.70527	7.54442	7.78482	7.80723	7.47339	7.59573	8.082	7.76559	8.25997	8.10506	8.00097	7.71658	8.0272	8.16102	8.12407	8.21339	8.17463	8.13489	7.80781	7.92683	7.95821	8.28724	7.63469	7.98118	8.22433	8.50279	8.55042	7.92315	8.34892	8.06455	8.82316	8.24983	8.14364	7.93252	8.47962	7.98118	8.17021	7.74806	7.92421
ATG14	7.47149	7.93687	8.66047	8.74011	8.26114	8.08492	7.87642	8.30629	8.27408	7.87066	8.4503	8.65537	7.85768	8.31729	7.86088	8.60526	8.69005	8.63309	8.58231	8.92087	8.78376	8.69854	8.91099	8.27421	8.8522	8.81266	9.0572	9.00181	8.49825	8.09326	7.70064	8.19927	7.98129	8.34626	8.47896	8.30793	8.40275	7.98539	8.61085	8.36759	8.96956	9.0393	8.97038	9.14778	7.711	8.22469	8.79683	7.98478	8.65794
ATG16L1	5.3913	5.49694	5.19064	5.27889	5.45176	5.20455	5.54786	5.3914	5.25308	5.61795	5.50037	5.53029	5.42244	5.96942	5.43685	5.27239	5.84019	5.51487	5.37474	5.43685	5.36944	5.52093	5.55252	5.53283	5.30081	5.69579	5.59953	5.15285	5.26751	5.43685	5.36412	5.60542	5.34759	5.6038	5.55839	5.11729	5.37768	5.6245	5.03428	5.36423	5.21899	5.01914	5.49924	5.53545	5.60884	5.26324	5.25701	5.31916	5.70686
ATG2A	8.34227	8.47107	8.5563	8.58115	8.64588	8.13291	9.11274	8.64033	8.49061	8.25355	8.42834	8.50531	8.34815	8.33431	8.39829	8.24589	8.94174	8.55069	8.88166	9.08712	8.59418	8.39029	8.86877	8.59353	8.78096	9.01715	8.71192	9.05293	8.53178	8.59438	8.51928	8.54186	8.56695	8.74995	8.78394	8.59861	8.88399	8.41325	8.58724	8.87633	9.4042	8.98482	8.35862	8.22634	8.30251	8.60045	9.08615	8.3361	9.02627
ATG2B	7.05143	7.0692	7.50912	7.69022	6.70737	7.72676	5.51272	6.85346	7.16143	6.77954	6.69108	7.15247	6.76452	6.81951	7.237	6.09754	7.84338	6.64908	6.96923	7.07235	6.86007	8.01072	6.78014	6.69174	6.59383	6.30551	6.44315	7.38943	7.28356	7.2767	7.79942	7.05345	7.62443	6.82758	6.63981	7.36894	7.67555	6.23197	7.54906	6.26191	5.54312	6.63685	5.43383	6.64695	5.66137	7.21748	6.85183	5.82328	6.52129
ATG3	10.4783	10.4812	9.76913	9.58039	9.53628	10.0112	9.40747	9.94252	10.4811	10.6169	9.86651	9.79361	10.5634	10.6589	10.4893	9.69481	9.53315	9.21909	9.76929	9.64946	9.56041	10.2225	9.40542	10.0216	9.85222	8.90735	9.29155	9.79251	10.1759	10.4147	9.84079	9.48564	9.65769	9.69021	9.73027	10.0011	10.1236	9.83512	10.0718	9.9562	9.0374	9.16981	9.66659	9.38106	9.01189	9.89785	9.12239	10.0988	9.30553
ATG4A	7.87484	8.025	7.59248	7.50214	6.77281	7.72181	6.94857	7.98654	8.0129	7.88478	7.61667	7.19133	8.21051	8.12686	8.15964	7.47266	6.96954	6.57633	7.4551	7.17017	7.17012	7.62901	6.77585	7.13381	7.43731	6.4133	7.03577	7.10817	7.64081	7.75737	7.94673	6.60841	7.19712	7.48353	7.40974	7.71559	8.09741	6.82845	7.62375	7.49502	6.43432	7.13704	7.25181	7.04994	7.08392	7.57774	6.77555	7.04626	6.81081
ATG4B	8.37635	8.37352	8.14319	7.94633	8.85032	8.29644	8.87324	8.19356	8.20591	8.11646	8.04927	8.4033	8.1	8.14693	8.36845	8.34701	8.37663	8.31971	8.40102	8.41029	8.29732	8.1756	8.61556	8.53335	8.30013	8.67032	8.71296	8.50915	8.29393	8.3123	8.15094	8.51358	8.69613	8.37352	8.37665	8.08979	8.16515	8.29077	8.4412	8.37772	8.95414	8.56303	8.78027	8.35429	8.24408	8.64467	8.44738	7.9434	8.21251
ATG5	9.16376	9.05851	8.89469	9.24773	9.26156	9.36242	9.34714	8.78099	9.29851	9.22182	8.79777	8.97329	9.15385	9.29135	9.4789	9.92311	9.02766	9.21106	9.11448	8.84538	9.7391	9.10978	8.99808	9.8945	9.6117	10.2194	9.75713	8.84443	9.1219	9.19105	9.07126	9.29043	9.75225	9.08314	8.7516	8.79879	9.02138	8.38411	8.89552	8.77029	8.70072	8.79761	9.38986	9.50021	9.3127	9.15201	8.43937	8.85114	9.27101
ATG7	7.61545	8.52797	7.12995	7.30823	7.37343	7.58938	7.10125	7.37835	8.13771	8.34756	7.50851	7.6856	8.66779	9.38632	8.37704	7.41461	6.97778	7.2203	6.79373	7.26602	7.31446	7.86136	7.10857	7.45806	7.63896	7.59382	7.56931	7.57658	7.60106	7.68367	6.95432	7.10984	7.12544	7.75395	7.26236	6.78154	6.94634	7.35405	7.94643	7.70807	7.02584	6.94291	7.26549	7.49965	7.05011	7.46164	7.10051	6.81394	7.32846
ATG9A	7.46298	7.68273	7.4319	7.62429	7.81921	7.68768	7.75409	7.84609	7.46726	7.64358	7.47525	7.35012	7.48055	7.52854	7.53706	7.1256	7.76146	7.46882	7.79109	7.51635	7.74999	7.58109	7.68203	7.64693	7.57923	8.42311	7.75266	7.62608	7.39047	7.59845	7.70403	7.64626	7.50198	7.3161	7.47668	7.57388	7.74883	7.7045	7.62486	7.59075	8.18329	7.63912	7.35533	7.54821	7.48565	7.99358	7.74354	7.85777	7.7986
ATIC	9.31438	9.34484	9.47629	9.50651	11.0287	10.2468	11.6479	9.54035	9.56945	9.57853	9.62322	9.99084	9.46884	9.60206	9.41961	10.1861	10.7866	10.5045	9.80528	10.0906	10.4621	9.554	10.2618	10.2181	9.67285	10.4564	10.7586	10.2837	9.47714	9.67099	9.34497	10.6032	10.9347	9.70303	10.0434	9.77116	10.0996	10.3139	9.90358	9.14986	10.6763	9.98596	9.87541	10.1972	10.4212	9.66868	10.4287	9.3766	10.0177
ATM	8.29038	9.58046	9.30433	9.02041	8.59765	7.8315	8.86958	8.14061	8.84596	8.74474	9.07473	8.77659	9.1682	9.80083	9.47136	8.50361	7.82545	8.83314	8.32144	8.83314	8.25439	9.45017	9.06316	8.33473	8.98472	8.48476	8.24466	8.36986	8.92211	9.18197	7.89463	9.26296	8.33298	9.07191	9.38136	9.15758	9.43079	8.98785	9.41102	9.21955	8.54195	9.09309	8.23005	9.2604	7.81342	8.87302	9.02034	8.65613	8.67037
ATMIN	9.15617	9.48523	9.98695	9.6667	9.27848	9.65303	9.55735	9.5415	9.26665	8.52718	9.67443	9.6288	9.30318	9.32616	9.52268	9.969	10.2922	8.94878	9.92761	9.98346	10.0157	9.53712	10.1142	8.63657	9.92262	9.81887	8.77802	10.0316	9.68395	9.4338	9.47153	10.3002	9.16104	9.7536	9.96333	9.78892	9.24048	9.90008	10.04	9.53484	10.6231	10.0753	10.0809	9.17528	9.60948	9.28414	10.1095	9.3899	8.01493
ATN1	7.13489	7.16756	6.92996	6.88818	7.01716	6.85309	7.02722	6.97284	7.01317	7.2454	7.01787	7.04688	7.43918	7.21026	6.9395	6.97799	7.0536	7.1448	6.98201	7.00003	6.84489	6.87413	7.15768	7.09952	7.01785	6.93455	7.07874	7.02194	6.96572	7.07264	7.0143	7.1309	7.19211	7.15791	6.8886	6.88683	6.99953	7.00493	6.77557	6.75798	6.92156	7.05417	6.89707	6.85509	7.02841	6.97434	6.98	7.08575	7.07769
ATOH1	5.56057	5.43282	5.22353	5.1713	5.41168	5.16871	5.17581	5.52661	5.40459	5.65827	5.07405	5.35108	5.68705	5.28223	5.29723	5.27081	5.30476	5.15473	5.38351	5.26896	5.15878	5.21327	5.34527	5.31936	5.29203	5.19765	5.68536	5.34798	5.03032	5.1731	5.45151	5.29112	5.35108	5.36853	5.09647	5.15447	5.41144	5.68176	5.12867	5.3917	5.72779	5.40065	5.47476	5.26596	5.56867	5.19046	5.31698	5.47712	5.55416
ATOX1	10.1452	10.3937	9.39269	9.56214	9.96708	9.78752	9.75082	10.2946	10.2619	10.4433	9.55667	9.3831	10.2513	10.4974	10.2902	10.4259	9.03391	9.79513	10.0207	9.29957	9.12615	9.61734	9.13592	10.1201	9.49899	9.15253	9.96981	9.23408	9.66953	10.0389	10.0273	9.65186	9.41666	9.50807	9.15476	9.81109	10.0174	9.83678	9.68969	9.75569	9.72386	9.20578	9.97503	9.70675	9.3732	10.0208	9.34147	10.3564	9.25522
ATP10A	9.45082	7.17106	6.62751	6.02448	5.9117	7.86812	5.6218	7.2997	7.7163	6.63595	6.80863	6.65238	7.76684	6.96362	7.03478	6.01833	5.46589	5.88861	6.35414	6.40439	5.96435	7.65615	5.84187	5.96369	6.08285	6.20363	5.73294	6.3855	7.41334	7.0155	6.77897	5.86461	5.87551	6.14877	6.67731	9.47467	6.39634	6.28607	6.87727	7.8594	5.80406	5.84824	5.56852	6.27286	6.09588	6.99092	6.09118	6.20181	6.0862
ATP10B	5.07154	5.43369	5.24831	5.17259	5.44729	5.01321	5.25141	5.47984	5.17009	5.41508	5.01709	4.99662	5.26058	5.29834	4.73773	5.52467	5.29043	5.1333	5.29306	4.87979	5.15683	5.18769	5.23903	5.32569	5.16942	5.7623	5.38792	4.78476	4.90936	5.25141	5.56366	4.90157	4.77442	4.7244	4.83036	5.00487	5.16756	4.76244	5.03153	5.44142	5.58088	5.07735	5.56852	5.81049	6.09588	4.99115	5.38193	6.04849	5.22149
ATP10D	9.42481	9.16412	9.54021	9.88413	7.69171	9.09323	6.99698	9.12839	9.23788	8.93019	9.01981	8.85592	9.06906	9.3952	10.1347	7.51838	8.10544	7.51131	9.41326	8.99084	8.64645	9.79225	8.30251	6.85457	8.86151	7.17057	8.29969	9.33748	9.54022	9.76368	9.55033	7.56938	8.02091	8.44428	9.34964	8.97815	9.55622	8.45387	9.46623	8.9653	4.35006	8.33477	8.22236	7.54347	7.75029	9.56439	7.51602	8.72864	6.66083
ATP11A	6.80158	6.73235	6.68258	6.50391	6.64956	7.08196	6.78441	6.71683	6.5851	6.71599	6.55726	6.71958	6.86786	7.17587	6.7547	6.54809	6.44898	6.53038	6.0423	6.5379	6.5736	6.74165	6.49311	6.50135	6.47315	6.04272	6.93726	7.19362	6.49141	6.67805	6.62269	6.86805	6.83966	6.55213	6.50017	6.57636	6.34867	6.32542	6.41275	6.53922	6.91519	6.85128	6.40824	6.65885	6.02691	6.82265	6.58682	6.70222	6.78186
ATP11B	9.2841	9.15881	10.068	9.67955	9.41945	9.89362	10.0751	8.95072	9.38063	9.13257	9.93198	9.81744	9.18804	9.0372	9.5128	10.1294	10.4303	9.88022	9.86424	9.8845	9.43101	9.5929	10.334	10.083	9.55108	9.30956	10.0304	9.3705	9.87035	9.65729	9.18262	10.6093	9.18059	9.93644	10.1809	9.87618	9.86437	9.80508	10.6453	9.54064	9.11422	10.4747	10.0129	10.0243	9.01328	9.87397	10.1064	9.38847	9.65894
ATP12A	5.96495	5.78031	5.5887	5.64661	5.6589	5.46625	5.95351	6.45005	5.68041	5.8774	5.69296	5.37114	5.86285	5.77944	5.84163	5.68059	5.51962	5.88841	6.07485	5.56924	5.63591	5.41969	5.56421	5.85928	5.77964	5.77632	6.11151	5.50108	5.7945	5.65141	6.75625	5.79868	5.72389	5.6805	5.53571	5.61629	5.779	5.72641	5.58732	5.82076	5.8895	5.65999	5.71937	5.61989	6.24903	5.81172	5.779	6.22009	5.63871
ATP13A1	8.01673	7.85158	7.80291	8.01037	7.95528	8.05491	8.20345	7.48045	7.87182	7.94039	7.65073	7.78167	7.95144	7.71471	8.11142	7.75403	7.88935	8.03578	8.2223	8.31355	8.30069	7.77724	8.47731	7.9697	8.22893	8.57777	8.23072	8.6792	7.99119	8.04433	7.77328	8.30225	8.00978	8.02462	8.16357	7.8165	8.52202	8.54627	8.30623	7.75252	8.31646	7.95685	7.83792	7.90859	7.65645	8.0051	8.40553	7.80927	7.80013
ATP13A2	6.86478	7.03063	6.54169	6.39549	6.76539	6.64654	6.7581	6.6937	6.86794	6.79826	6.70666	6.63999	7.13113	6.90892	6.79421	6.55075	6.97878	6.59674	6.97722	6.80893	6.79427	6.58827	6.9626	6.72302	6.7166	6.9126	6.80707	6.88362	6.65837	6.95416	6.96306	6.64877	6.83495	6.78412	6.70506	6.80559	6.5184	6.62015	6.84166	6.8119	7.10313	6.51132	6.89994	6.26435	6.78699	6.87083	6.92708	6.89325	6.78414
ATP13A3	11.1493	10.2295	9.42332	9.75698	10.3829	9.49789	10.8452	9.91682	10.0284	11.1957	9.79343	10.1186	10.5242	10.4026	10.6295	10.2688	10.207	10.3148	10.2403	9.86598	10.4677	10.0479	10.2608	10.7404	9.83903	10.6657	10.2323	10.0075	9.89054	10.5641	10.2571	10.2437	10.2469	10.101	10.2668	10.4837	10.8363	10.0854	10.6906	9.89745	10.2943	10.4102	9.87917	11.1547	9.93331	10.4645	10.3879	10.5638	10.657
ATP1A1	10.9677	10.3107	9.70078	10.1905	10.4898	10.4863	10.877	12.7022	10.2981	10.4873	9.88208	9.67608	10.523	10.5417	10.5398	11.2547	10.1398	10.156	11.9673	9.80492	10.5125	11.0271	9.56498	10.1079	10.0915	10.9877	10.2092	10.184	11.0721	10.4129	13.3254	10.2067	10.5209	10.3258	10.2243	9.68187	10.8719	10.7249	10.7941	11.4093	10.0923	10.2069	9.61472	10.0003	10.5742	10.3691	9.98065	11.176	10.3948
ATP1A2	6.1061	6.41689	10.4401	7.27596	6.66235	7.06286	6.25247	6.34573	7.74469	6.28245	6.36187	5.86416	5.35227	5.52384	5.35227	6.33687	7.94384	6.14614	7.55754	5.93264	7.69376	6.88512	6.01463	6.53203	6.15361	6.16768	6.34573	6.14958	7.21995	5.25588	6.06135	5.74011	5.82421	6.35985	8.06227	6.37628	12.1216	8.10948	7.20578	5.98639	6.07856	6.34291	7.43848	5.36552	6.06483	5.91129	5.95203	9.6682	8.46117
ATP1A3	4.05599	3.93239	3.97112	3.83591	3.99842	3.96189	4.04078	4.09982	3.94607	4.02874	3.89345	3.8886	4.01902	3.97112	3.86698	4.14447	3.98537	4.016	4.15745	3.96223	3.9032	3.75707	3.86746	4.17917	4.00283	4.07978	4.18625	4.00759	3.97839	3.92237	4.0555	4.04822	4.18493	3.99191	3.94775	4.06352	4.07266	3.99981	3.88425	3.87317	4.10854	3.97112	4.20274	3.80514	3.86918	3.77516	3.62702	4.22503	3.78368
ATP1B1	11.073	11.7151	11.9288	12.8129	10.8557	10.6621	10.0229	14.0479	10.3991	11.3878	11.4726	10.7121	12.161	11.7712	10.8478	10.827	10.9301	10.4378	13.4065	11.3452	11.919	12.5219	10.5214	9.36287	11.6681	11.1046	9.89346	11.1277	12.7779	11.1458	14.4825	10.3532	9.93886	12.2134	11.575	11.2615	12.4217	13.0089	11.8169	13.4047	9.69162	10.1833	10.4368	10.4887	8.81784	11.4283	10.1677	11.7326	10.4466
ATP1B2	6.36223	6.48594	6.31118	7.06491	5.89587	6.29421	6.37215	6.68494	6.40236	6.29795	6.73082	6.1301	6.44521	6.16836	6.2757	5.94853	5.78456	5.97815	6.7826	6.6225	5.91146	6.57174	6.19943	5.98395	6.3342	6.12694	6.06386	6.69417	6.29641	6.30909	7.00562	5.78611	6.49742	6.23174	6.44244	6.28786	7.1595	7.50447	6.11939	7.13222	5.66142	6.19471	5.64332	6.09997	6.58639	6.98345	6.43233	7.41958	5.68316
ATP1B3	12.9162	11.1084	10.112	11.1555	10.5259	10.7073	10.9905	10.7088	11.3378	11.7106	10.4722	10.2576	12.0412	11.5205	11.9085	10.0028	9.75776	9.86858	10.4308	9.35821	10.3726	10.9302	9.37712	10.8565	9.8157	10.877	10.6001	9.62503	10.7974	11.2062	11.688	10.2402	11.1628	9.92944	10.0424	10.3709	9.68008	10.2766	10.7824	10.5609	9.84517	9.04781	10.1319	10.1061	9.99634	11.234	9.86502	9.28365	10.0577
ATP1B4	3.94029	4.67113	3.88121	4.06651	3.92142	4.1173	3.91712	3.9232	3.85912	3.91998	3.81101	4.06044	4.04503	3.98607	4.16665	4.14133	4.2015	3.80409	3.99355	4.01869	4.27483	4.14878	3.99399	3.99058	3.98607	4.04687	4.13495	3.93567	4.08019	3.91998	4.07151	3.95313	3.86586	3.88189	3.89948	4.00356	4.06387	4.04933	3.95112	3.85268	4.10373	3.96168	3.88625	3.85868	3.93579	3.86316	3.86714	4.55483	3.99399
ATP2A1	4.56357	4.7836	4.43926	4.40227	4.61886	4.48611	4.54874	4.27179	4.4368	4.94662	4.45885	4.47044	4.69488	4.60646	4.55151	4.26582	4.46346	4.47787	4.39054	4.44675	4.27625	4.28975	4.61073	4.68341	4.55884	4.61324	4.72493	4.36084	4.37851	4.40565	4.6106	4.35792	4.36334	4.41151	4.31879	4.0454	4.37698	4.42167	4.18306	4.42494	4.92445	4.60756	4.27096	4.38228	4.33497	4.59265	4.49388	4.54821	4.667
ATP2A2	10.0604	10.5891	9.44357	9.96235	9.82991	10.7031	10.0601	9.42713	9.783	10.9736	10.0842	9.69802	10.1453	9.9211	10.3408	9.33354	9.97236	10.0894	9.91062	9.95543	9.91111	9.89635	10.1448	9.9211	10.5169	9.68108	9.50053	10.2329	9.95857	9.98917	9.76933	9.94847	9.50619	10.6364	10.2299	9.61035	9.53784	9.62139	10.4037	9.72097	9.65438	10.5812	9.22771	9.63647	9.29623	10.0106	9.9603	9.53906	9.57911
ATP2A3	7.20249	7.44782	6.88127	6.84797	6.25123	6.96385	5.87882	6.61122	7.312	7.3694	6.44541	6.47362	7.26298	7.53583	7.21788	6.07907	5.99898	6.10604	6.52296	6.16946	5.5936	7.13155	6.16433	6.07305	6.24466	6.50232	6.24039	6.09688	6.99119	7.49508	6.88082	5.72519	5.80436	6.31827	6.85239	6.88287	6.37967	6.15564	6.99666	7.52825	6.39479	6.14114	6.44284	6.30434	6.65083	6.02865	6.45701	6.76484	6.68394
ATP2B1	10.6314	10.7898	10.4353	10.9297	9.81911	10.5724	10.3153	9.4038	10.0245	10.9991	10.9264	10.7244	10.6717	10.6338	10.6416	10.3042	10.8023	11.0073	9.58178	11.1421	10.818	10.2717	11.1482	11.0236	11.1572	10.7721	10.8717	10.7399	10.3637	10.7135	9.75038	10.1278	10.21	10.9342	10.911	11.0333	10.1743	10.9726	10.7163	9.52518	8.43548	10.8823	9.70828	9.24869	9.24314	10.6744	10.3341	9.60358	9.54884
ATP2B2	5.23688	5.47263	5.08316	5.41328	5.1808	5.09815	6.14056	5.67646	5.34596	5.73486	5.57736	5.30569	5.43053	5.21104	5.46429	5.50521	5.37107	5.49591	5.14048	5.34936	5.10992	5.05664	5.32876	5.22759	5.36014	5.71056	5.37943	5.93167	5.04778	5.18269	5.40169	5.57591	5.37154	6.11884	5.07317	5.12628	5.21517	5.33651	5.02888	5.33762	6.28687	5.32334	5.33967	5.64012	5.63407	5.37943	5.5969	5.49035	5.35075
ATP2B3	5.42255	5.46763	5.35423	5.39003	5.57829	5.37176	5.48537	5.46611	5.46665	5.39239	5.27726	5.49132	5.40273	5.40313	5.25678	5.41054	5.46024	5.57416	5.40954	5.46245	5.35579	5.31058	5.29069	5.51036	5.39225	5.37244	5.73929	5.451	5.32981	5.45602	5.39352	5.27861	5.28661	5.33725	5.22971	5.39995	5.3072	5.27931	5.29265	5.13523	5.54085	5.45999	5.64037	5.58326	5.66385	5.52941	5.56888	5.45244	5.36591
ATP2B4	10.1397	9.79044	9.91195	9.94853	9.10308	9.8139	8.6197	8.96884	9.55617	9.59562	9.81088	8.97902	10.0931	9.6252	9.40878	9.2828	10.4916	8.78578	9.17621	8.69829	9.12095	10.0198	9.1953	9.70749	9.1202	8.75759	9.77367	8.95721	9.69406	10.1802	9.04957	9.02908	9.40428	9.43257	10.2754	11.1658	11.918	10.7263	9.9237	9.89951	7.16013	9.27015	8.38929	7.06883	9.23677	10.5025	9.04122	10.2078	9.17234
ATP2C1	8.60641	8.3738	9.44756	9.04571	9.00879	8.62118	8.77814	8.37301	8.63459	8.94834	9.42863	9.82954	8.47253	8.40849	8.92405	9.28447	9.8975	9.40088	9.4659	10.1466	9.58208	8.97489	10.6442	9.73767	10.1493	8.43342	9.83066	9.50337	9.66953	9.10747	9.18157	10.1875	9.0907	9.48263	9.58567	8.92454	9.28895	9.95804	9.65681	8.63162	9.64187	9.7986	9.89554	9.38843	8.57939	8.41806	9.78221	9.0217	9.8551
ATP2C2	4.97112	4.97112	4.79686	4.58689	4.69008	4.83264	4.88564	5.25319	5.04296	5.26897	4.75092	4.79193	4.97112	5.00012	4.94776	4.76557	4.94947	4.86051	5.1468	4.82739	4.97112	4.77273	4.8378	4.75511	5.1322	5.32079	5.03266	4.84543	4.83792	4.73251	5.44963	4.94583	4.81353	4.95904	4.9675	4.69984	4.76281	4.80784	4.87791	5.62764	5.19278	4.67294	5.29209	4.98068	5.36207	4.98468	5.02648	5.58955	5.15507
ATP4A	6.55456	6.1932	6.05857	5.87377	6.27774	6.03956	6.24675	6.21181	6.43203	6.50357	6.32303	6.26195	6.20922	6.22992	6.3009	6.23777	6.36802	6.19845	6.22909	6.27205	6.16095	5.93851	6.23691	6.40666	6.25822	6.28115	6.45607	6.23303	6.16609	6.22015	6.26584	6.12228	6.34761	6.29582	6.20713	6.07771	6.06708	6.24541	6.08151	6.17662	6.72589	6.20151	6.39331	6.35024	6.18672	5.99416	6.30014	6.10562	6.37908
ATP4B	4.75069	4.62954	4.62023	4.51195	4.86173	4.77276	5.51576	4.8208	4.86931	4.92065	4.61004	4.54863	4.76464	4.74253	4.55365	5.04555	5.18229	4.91275	5.03746	4.94489	4.47865	4.22324	4.80951	4.8854	4.7883	4.76079	4.97531	4.85914	4.74753	4.49701	5.03703	4.85623	4.83218	4.72287	4.95382	4.9204	5.82058	6.12608	5.04839	4.95513	5.42766	5.35111	5.66163	5.07739	5.31751	4.69793	4.86429	6.42092	4.89134
ATP5F1A	12.4435	12.6631	13.037	13.4819	13.3363	13.2297	13.5856	13.8844	12.673	12.5623	12.9631	13.1231	12.3818	12.6376	12.6142	13.7001	13.8604	13.3718	13.1389	13.1411	13.6769	12.8027	13.2416	13.2238	13.4091	13.4165	13.4562	13.4866	12.9192	12.8616	13.8653	12.958	13.5102	13.082	13.1979	13.1186	13.1728	13.0663	13.0887	13.0944	13.7969	13.1773	13.4547	13.1428	13.4109	13.5804	13.1389	12.7527	12.9638
ATP5F1B	11.2479	11.1428	11.2528	11.3655	11.8303	11.6113	12.2037	12.42	11.0107	11.3868	11.1776	11.3706	11.0399	10.9595	11.1902	11.9674	11.4835	11.8996	11.5476	11.3237	11.4044	10.8309	11.1917	11.8507	11.3685	11.2571	11.7378	11.7057	11.1025	11.1246	12.5253	11.556	11.8377	11.4306	11.2877	11.3499	11.205	11.2322	11.1843	11.3496	11.7078	11.1772	11.819	11.5002	11.5691	11.6822	11.4816	11.1616	11.0798
ATP5F1C	11.5372	11.5624	11.4365	11.6448	11.9495	11.6557	12.1671	12.661	11.7034	11.4459	11.4106	11.2968	11.5146	11.5631	11.4689	12.6858	11.7225	11.8215	12.4127	11.7234	11.9148	11.7486	11.8968	12.1691	11.7075	12.2821	12.0134	11.7566	11.693	11.7881	12.6811	11.9566	12.4274	11.7015	11.7052	11.7232	11.9092	11.8436	11.7725	11.9991	11.9686	11.2761	12.5755	12.1944	12.5028	11.7301	11.6328	12.107	11.6627
ATP5F1D	8.90862	9.18354	9.06252	9.14387	9.46802	8.96846	9.22724	9.82678	9.18264	8.9628	8.84704	8.68417	9.0007	8.87085	8.88078	9.44566	9.10096	9.22698	9.71396	9.29418	8.85385	8.96552	8.82997	9.33734	8.71793	8.58726	9.66889	8.92674	9.22657	9.03192	10.0119	9.25752	8.48367	8.69374	9.05378	9.41778	9.6455	10.0091	9.05278	9.18106	9.51283	9.2667	9.54929	8.70933	8.77066	9.53587	9.36834	9.70776	8.95203
ATP5F1E	12.8514	13.1341	12.6148	12.3797	12.791	12.8728	12.4802	12.8258	13.157	12.9557	12.7218	12.6757	13.1135	13.145	12.9129	13.3019	12.3452	12.8812	13.2692	12.4341	12.9393	12.7704	12.791	12.9441	12.7644	12.8665	12.8671	12.4375	12.7688	12.9426	12.8791	12.6534	13.2028	12.9481	12.4521	12.463	12.3279	12.921	12.7234	13.0889	12.8576	12.3605	12.9006	12.9082	13.2023	12.6959	12.4695	12.0922	12.5831
ATP5IF1	9.93773	9.9725	9.78489	10.0361	10.3512	9.56431	10.2214	10.9347	9.81914	9.44109	10.079	9.72753	9.79077	10.1339	9.81678	11.6327	9.61183	10.1024	10.7827	10.0594	10.0577	9.71773	10.0827	10.4916	10.0462	9.80956	10.4309	10.1411	9.99482	9.79549	11.0412	8.93726	10.5775	9.68142	10.3686	10.8645	10.0902	10.1577	10.0574	10.2454	10.1134	9.91505	10.8121	10.1324	9.49314	10.4621	9.56717	11.2886	9.4907
ATP5MC1	9.37275	9.35223	8.98197	9.11309	9.88846	9.6466	9.29317	10.4357	9.02597	9.22417	9.17736	9.09909	9.32696	9.09215	9.19	10.4227	9.36546	9.44092	10.0395	9.00883	9.3751	9.01489	9.2192	9.97705	8.98129	9.20276	10.0162	8.90101	9.33262	9.33614	10.5058	9.31535	9.58377	8.94321	9.15063	9.55579	9.79845	9.39586	9.04362	9.25925	9.2302	8.43665	10.019	9.31751	9.77334	9.75503	8.84282	9.24901	9.17119
ATP5MC2	11.0304	11.5472	11.5064	11.5063	12.5652	11.9044	12.1479	11.8495	11.7211	11.9456	11.8914	11.7888	11.4654	11.6961	11.3022	12.6996	12.1924	12.7398	12.0763	12.0339	11.9128	11.621	12.0695	12.8017	12.1847	11.9953	12.6285	11.6387	11.8456	11.3657	11.7307	12.0122	12.2868	12.3378	11.7795	11.6393	11.8625	12.3132	11.7424	11.7468	12.0498	12.0416	12.7516	12.1254	12.5145	11.7059	12.0813	11.7496	12.303
ATP5MC3	11.5082	11.7112	11.3578	11.4657	12.483	11.8733	12.6711	12.7692	11.6674	11.7841	11.7304	11.6016	11.7653	11.6312	11.6609	12.8602	12.2167	12.0111	12.2807	11.9979	12.0068	11.4965	11.9806	12.3144	11.8013	12.0406	12.6286	11.6638	11.6561	11.7243	12.9623	12.3083	12.2934	11.9936	11.7729	11.7101	11.8176	11.882	11.8303	11.9521	12.1379	11.8762	12.769	12.1645	12.5373	12.1736	11.8364	11.7571	12.1202
ATP5ME	11.2363	11.374	11.1874	11.389	11.7687	11.1563	11.6879	11.7923	11.6503	11.4113	11.4866	11.4065	11.1346	11.3103	11.148	12.593	11.3513	11.6525	12.2783	11.4499	11.6259	11.4244	11.6275	12.1075	11.5062	11.9922	12.0683	11.2145	11.5137	11.363	11.9541	11.7692	12.2724	11.6626	11.2929	11.3563	11.4391	11.3486	11.2515	11.67	11.9116	11.2472	12.1838	11.946	11.8859	11.954	11.2649	11.307	11.5571
ATP5MG	11.9939	12.1181	12.3054	12.218	12.7714	11.5906	12.5287	12.58	12.392	12.196	12.4117	12.1567	12.0906	12.256	12.1297	13.4763	11.8396	12.8804	12.8153	12.5805	11.6095	12.1827	12.713	12.6526	12.5332	12.2547	13.1378	12.2071	12.3592	12.1529	12.6326	12.5484	12.6797	12.7525	12.3793	12.2036	12.1303	11.9902	12.3696	12.2351	12.8891	12.619	13.2954	12.8289	12.9751	12.4504	12.691	12.1284	12.5569
ATP5MPL	10.7884	11.1505	11.0084	10.9381	11.7161	11.067	10.897	11.606	11.4191	11.2153	11.1861	11.0138	11.0881	11.2253	11.1101	12.5146	11.2928	11.4925	11.7866	11.0247	11.2108	11.0286	11.3099	11.9718	11.0579	11.6157	11.6345	11.0767	10.8148	11.1462	11.3596	11.6545	12.2099	11.4385	10.9513	10.9048	11.179	10.9665	11.0384	11.6157	11.9183	10.9353	12.2048	11.6087	12.0874	11.6364	11.3729	10.9295	11.452
ATP5PB	12.0693	12.4336	12.1198	12.2619	12.574	12.2883	12.4697	13.0464	12.4359	12.3912	12.3635	12.3572	12.3575	12.3692	12.2413	13.4733	12.5249	12.4904	12.7931	12.3286	12.6034	12.1992	12.4881	12.6039	12.4581	12.1771	12.825	12.414	12.2631	12.2948	13.0043	11.771	13.0129	12.3331	12.3128	12.2205	11.4762	11.8915	12.3514	12.4481	12.7177	12.2352	13.14	12.4113	12.949	12.4202	12.4735	12.1915	12.3129
ATP5PD	11.611	11.6373	11.3982	11.4615	11.8196	11.7393	11.7053	12.3769	11.7874	11.648	11.3983	11.2818	11.7066	11.785	11.5163	12.4922	11.3097	11.4667	11.7963	11.2568	11.4253	11.4144	11.2058	11.3641	11.3684	10.924	11.7671	11.2283	11.4243	11.4082	12.288	11.4851	11.1914	11.3267	11.1932	11.3301	11.1912	11.1479	11.2777	11.7687	11.5039	11.09	12.0508	11.4962	11.5933	11.7036	11.3139	11.4322	11.198
ATP5PF	11.0999	11.2125	11.3445	11.3909	11.8938	11.2014	11.627	12.2095	11.4973	11.2983	11.3917	11.2474	11.328	11.3678	11.1654	12.4736	11.643	11.7279	12.1272	11.4633	12.1539	11.3392	11.4955	11.9478	12.0925	11.7771	11.996	11.455	11.4247	11.3969	12.3234	11.9612	13.3573	11.5412	11.3547	11.5279	11.5394	12.0225	11.4163	11.8105	11.7767	11.5475	12.0628	11.8979	11.9095	11.5763	11.4713	11.4293	11.6357
ATP5PO	11.5398	11.8418	12.0502	12.0731	12.63	11.7717	12.2592	12.2814	12.3526	11.7806	12.2453	11.9913	11.7228	11.7658	11.6818	13.3574	12.1147	12.5405	12.8174	12.2729	12.4006	11.9658	12.4269	12.9179	12.6142	12.1553	13.0551	11.9201	12.0893	11.8884	12.6125	12.374	12.4675	12.417	12.1762	12.0581	11.7885	12.6098	11.9807	12.275	12.6327	12.2884	13.2192	12.474	12.8781	12.1781	12.1513	11.5756	12.2962
ATP6AP1	10.6009	10.6396	10.0652	10.1553	9.76894	10.0126	9.93836	10.1195	10.2043	10.6074	9.84392	9.87008	10.9436	11.2874	10.607	9.32095	9.8419	9.34375	9.74481	9.73657	9.5785	10.2589	9.62691	9.13785	9.9326	10.0122	9.84344	10.1763	10.1247	10.1271	10.4038	9.80189	9.4375	9.81888	9.90033	9.65621	9.79679	9.73142	10.4512	10.2917	9.55185	9.88968	9.30446	8.9528	9.51612	9.92828	9.43732	9.37417	9.196
ATP6AP2	12.4748	12.9374	12.5056	12.4618	11.4325	12.5459	11.7671	12.8676	12.6461	12.6957	12.3419	12.1878	13.0151	12.9841	12.8869	12.1068	12.0868	11.4821	12.1425	12.1377	12.0725	12.7067	11.9905	11.1666	12.5283	11.9661	11.5393	12.3302	12.6691	12.6491	12.7914	11.9109	11.8022	12.0982	12.3482	12.43	12.5577	12.0082	12.613	12.7397	11.4267	12.0252	12.0127	11.6409	11.5647	12.6248	12.0014	12.4007	11.7188
ATP6V0A1	8.02249	8.55131	7.85269	8.2281	7.67057	8.00557	7.80689	8.5031	8.08718	8.31546	7.87579	8.10117	8.35496	8.68471	8.37403	7.6047	8.09351	7.70851	8.05044	7.98667	7.68516	8.09377	7.9583	7.4253	7.88684	8.07559	7.79713	7.86414	7.97569	8.09337	8.747	7.38271	7.83962	8.2832	8.09532	8.00721	8.01084	8.05208	8.06347	8.61754	8.29246	7.82996	7.67181	7.81514	7.93941	7.77758	8.16079	7.993	8.06684
ATP6V0A2	7.88151	6.99645	6.42178	6.19062	7.22645	7.31836	7.41096	6.01256	7.14406	7.5841	6.89083	7.4111	7.30109	7.18287	7.50336	7.12586	7.62776	7.52568	6.52587	6.9934	7.18407	6.82474	7.16245	7.42256	6.96706	7.68441	7.06997	7.31526	6.90403	7.05737	6.26505	7.97006	7.89277	7.63759	6.33301	6.20085	6.7365	5.76251	6.93683	6.36945	6.71971	6.87298	7.0243	6.59694	6.7665	6.63614	6.88695	5.96416	6.69113
ATP6V0A4	4.35199	4.12851	4.088	4.31667	4.22424	4.46955	3.97483	9.26051	4.10402	4.16456	3.97425	3.86793	4.03768	5.15562	4.0406	4.55452	3.77601	3.84193	8.72511	3.97905	4.69717	5.39296	4.08243	4.17278	3.85399	3.96644	4.35099	4.08849	7.73359	4.18509	10.3242	4.03651	4.46579	3.97689	3.74264	3.75721	3.90348	3.82391	6.02382	7.655	4.13248	4.04572	4.0912	4.37758	4.39537	4.43954	4.18576	4.89941	4.21691
ATP6V0B	10.657	10.7581	9.41281	9.28763	9.86204	9.97365	9.28706	10.5852	10.553	11.1052	9.78398	9.86728	10.922	11.1494	10.9881	10.6791	10.0009	9.72436	10.4502	9.66754	9.94076	9.90089	9.49654	9.61638	10.2744	9.54967	10.0828	10.0481	10.1	10.4128	10.9762	8.95498	10.7001	10.1587	9.62758	9.44992	9.00793	9.4359	10.1538	10.5283	9.9099	9.53347	10.8419	9.67827	9.4554	10.279	9.64216	10.0996	10.1532
ATP6V0C	10.4477	10.433	9.46783	9.63801	9.7071	9.70954	9.75892	10.5275	10.1311	10.5147	9.77531	9.79887	10.5239	10.7167	10.3989	9.10897	9.53368	9.41906	10.0782	9.98348	9.48359	9.98883	9.59059	9.58428	9.88006	9.95001	9.88086	10.0891	10.051	10.1174	10.6619	9.73347	10.1213	9.92213	9.81527	9.52518	9.65424	9.89957	9.98763	10.3544	9.80738	9.71144	9.48905	9.21666	9.3395	10.0586	9.97273	10.0105	9.87855
ATP6V0D1	10.0184	10.7405	9.67329	9.7258	8.81225	9.91605	8.91442	10.0717	10.4285	10.7201	9.92091	9.80498	11.0341	11.3148	10.6026	9.97099	9.89215	8.47043	9.90843	9.8864	9.41624	9.79846	9.28876	8.57429	10.0217	9.22475	8.92664	9.76986	9.96054	10.1862	9.97472	9.3732	9.16005	9.78748	9.83104	9.7344	8.69695	9.88505	10.0636	10.3815	10.0698	9.84884	10.3275	8.1787	8.76149	10.346	9.30936	10.0711	9.16793
ATP6V0E1	12.3471	12.2088	11.7085	11.0987	10.8199	11.8144	10.6242	11.9242	12.1712	12.1642	11.4099	11.287	12.4566	12.6934	12.1864	11.3144	10.382	10.7059	11.8781	11.157	10.8439	12.1015	10.6387	10.6393	11.5733	10.3533	11.0149	11.3302	12.0327	12.3483	12.0984	10.9459	10.3417	11.273	11.3128	11.6568	11.6533	11.7823	11.8018	12.0035	9.33082	10.9281	11.2623	10.8004	10.6746	11.5813	10.2019	10.6084	10.7441
ATP6V0E2	7.04746	7.26682	7.51156	7.15705	7.79722	7.62533	8.01776	9.2313	7.02506	7.00615	7.16866	7.44777	6.84267	7.61287	7.27542	7.45408	7.85445	7.69594	8.06377	7.94688	7.9587	7.32043	7.90135	6.88259	7.65205	8.50222	6.77236	8.41237	7.33069	7.52717	8.57194	8.35635	9.01321	7.8535	8.0833	8.02704	8.57998	8.87523	7.64788	8.01394	8.63941	7.36509	7.4742	7.7536	7.6166	6.98465	8.23984	7.61133	7.76635
ATP6V1A	11.2853	11.7033	10.4104	10.5337	10.1646	10.7872	10.4652	12.077	11.317	11.8788	10.6027	10.654	11.7547	11.6584	11.5019	10.5158	10.5586	9.91806	11.5234	10.7144	10.8778	11.1923	10.4476	10.9633	10.9464	9.98547	10.9077	10.7399	11.128	11.4349	12.5482	10.6294	10.7484	10.7817	10.9597	10.8601	10.9249	11.1265	11.248	11.4336	10.4698	10.7877	10.6536	10.5871	9.88475	11.0612	10.5339	10.8248	10.4186
ATP6V1B1	5.24748	4.86093	4.81149	5.13775	4.96512	4.88353	4.91524	6.28159	5.02479	4.90041	4.91132	4.95729	4.97106	4.94109	5.01698	4.97106	4.7767	5.07352	5.70472	4.88651	4.74782	4.77547	4.86852	4.88592	4.92793	5.09459	5.14313	5.03158	5.0534	5.06499	6.74112	5.11497	4.99097	4.79296	4.88265	4.74879	4.71383	4.97104	4.75809	5.49168	4.97106	4.98624	4.97106	4.87825	4.94319	4.97106	4.76891	5.13135	4.94201
ATP6V1B2	10.7267	11.4921	10.0542	9.532	9.51088	10.6513	9.25006	11.325	10.9897	11.4079	10.3814	10.4647	11.4671	11.897	11.5038	8.80918	9.30452	9.39973	9.77782	9.70802	9.59122	10.7929	9.44126	9.12659	10.4896	9.16443	9.38138	9.96576	10.538	10.6775	10.728	9.69527	10.2564	10.0886	9.7968	9.59722	9.44837	10.1051	10.8701	10.8848	9.65846	9.28089	9.26521	9.25371	9.14267	9.9312	9.2751	9.07349	9.5674
ATP6V1C1	9.6117	9.88726	8.49846	8.30723	7.89578	9.22305	7.40207	9.45017	9.49215	10.1273	8.85367	8.87813	10.104	10.2683	10.0849	8.41378	8.59662	7.56689	8.38978	8.39372	8.35873	9.13672	7.84055	7.45418	8.73035	7.44732	8.07815	7.74477	8.86261	9.49915	9.31533	7.97829	8.71294	8.7314	8.04086	8.42879	8.5815	8.39167	9.00257	8.61222	6.43425	8.30562	7.80326	7.11267	7.54762	8.53664	7.51126	7.86273	8.16542
ATP6V1D	10.8954	10.5758	9.97871	10.1183	10.1936	10.1957	9.35501	11.0694	10.3794	10.8638	10.1656	10.1243	10.7749	11.1769	10.7357	10.8472	10.266	9.99715	10.632	10.1238	9.58031	10.3509	9.98078	9.73203	10.4182	10.4139	10.3973	10.1795	10.1613	10.3494	11.2155	9.52739	9.83523	10.3163	9.84207	10.6556	10.6671	9.95774	10.3805	10.1485	9.2788	10.2334	10.4307	9.71407	10.0897	10.2851	9.8618	10.5591	9.71894
ATP6V1E1	10.2585	10.3004	9.97615	9.95853	9.69681	9.96549	9.43711	10.8923	10.1797	10.3241	9.87741	9.84438	10.1548	10.4926	10.4612	10.1415	9.88402	9.68044	10.0828	9.81077	9.83752	10.1413	9.51122	9.68167	9.92933	10.0699	10.2633	10.686	10.2332	9.90302	10.837	9.01766	10.2026	9.71796	9.9021	10.2012	10.0908	9.73046	9.9204	9.97946	9.18629	9.39449	9.76955	10.0597	9.70553	9.94476	9.32665	10.1951	9.54278
ATP6V1F	10.5804	10.4284	9.68356	10.39	9.66537	9.89018	9.24231	10.48	10.6078	11.1152	9.93204	9.99865	10.6493	11.0476	10.6699	10.0064	9.38247	9.56964	10.5617	10.2113	9.73629	10.4956	10.0466	10.0422	10.4428	9.39552	9.72283	10.0198	10.4648	10.4883	11.0579	10.2633	10.7143	10.3902	9.88708	9.52263	9.9736	10.2823	10.4014	10.4533	9.57401	9.42315	10.1908	10.1951	10.5857	9.01729	9.43783	9.93421	10.2627
ATP6V1G1	12.2592	11.9687	11.9414	11.9481	12.0386	12.0741	12.4302	11.9768	11.9922	12.2593	12.079	12.0889	11.8984	11.9487	12.0571	12.8014	12.1561	12.207	12.2666	12.2415	12.903	12.0063	12.3464	12.3894	12.251	12.3439	12.3671	12.408	11.9468	12.0729	11.9511	12.0343	12.3307	12.3763	12.04	12.0485	12.2866	12.274	12.1592	11.4207	11.6303	11.683	12.3682	12.061	12.1978	12.2802	11.9043	11.9254	11.8254
ATP6V1G2	5.49082	5.76746	5.59091	6.52951	5.44729	5.42293	5.82132	6.15319	5.83493	5.42619	5.62361	5.44809	5.78892	5.38721	5.43803	5.77631	5.93789	5.56471	5.72232	5.89163	5.12537	5.59232	5.55652	5.86889	5.53972	5.72011	5.70902	5.45657	5.47904	5.4893	6.02471	5.72232	6.03336	5.27952	5.7709	5.96295	6.46641	6.09993	5.52527	5.94321	5.73883	5.42448	6.15411	5.71414	5.7414	6.1541	5.60291	5.72232	5.86238
ATP6V1H	9.0801	9.66178	9.22579	9.10268	9.22141	9.3524	9.2495	10.1211	9.40698	9.72459	8.83529	9.00669	9.7959	9.80667	9.34562	9.78285	9.35707	8.7852	9.88842	9.59848	10.0033	9.46461	9.25687	9.46116	9.45527	9.56621	9.88872	9.63025	9.51231	9.72594	10.5792	9.20096	10.1221	9.12595	9.35446	9.71989	9.58457	9.79232	9.7484	9.40004	9.43227	9.18406	9.54918	9.0504	8.93471	9.54906	9.00871	9.28753	8.70445
ATP7A	7.60219	7.77947	8.2197	8.10139	7.50863	7.63247	7.55054	7.37973	7.71551	7.6377	7.64027	7.60387	7.85328	7.9212	7.97554	7.64879	7.63066	7.13643	7.68713	7.83745	7.9077	7.91328	7.7632	7.31078	8.0176	6.87763	7.80975	7.87451	7.87135	7.57268	7.48223	7.46256	7.38851	7.68675	8.31635	7.92964	8.32746	7.92368	7.98019	7.77754	7.4984	8.26826	7.66944	7.53542	7.23478	8.52232	7.7915	7.35381	6.59792
ATP7B	6.04441	5.44165	6.84048	7.04425	7.47467	7.35326	8.60693	6.87738	6.18413	5.22927	6.53712	6.51161	6.04706	5.59147	5.59899	7.86551	6.64951	7.31702	6.97862	6.95467	7.49378	6.37959	7.07424	7.33837	6.71536	7.38343	7.65615	7.00739	6.59531	6.78365	6.7321	7.69132	7.15565	7.01064	6.60237	6.30285	7.01867	6.96563	6.97199	6.78298	7.88224	7.29612	7.49112	7.24356	8.202	8.05022	7.67668	6.13184	7.37743
ATP8A1	8.34214	9.92083	9.24219	8.188	8.27872	7.91449	8.76525	8.74007	8.8369	7.7809	8.92754	9.12034	8.68143	9.87504	8.5253	9.47546	7.27679	8.64818	9.01795	8.70831	8.29039	9.66946	9.01275	7.618	8.98898	8.17051	8.01494	9.3012	9.3691	8.64425	8.56554	8.10925	8.82568	8.96196	9.56646	8.96615	10.1855	8.96064	9.68908	9.65204	7.01581	8.54924	8.10981	8.56145	8.53085	8.46169	9.08117	8.94249	8.07364
ATP8A2	6.23027	5.92023	6.45976	7.63679	8.53059	6.95289	7.82733	6.44143	6.13306	6.43491	6.92131	6.85522	6.49759	6.05445	6.24908	7.42835	8.60252	7.63789	6.98596	7.0792	9.1425	6.07357	7.48189	8.46079	6.75914	7.55895	7.38069	7.16875	6.67198	6.72898	6.1623	7.33298	6.96874	6.82693	7.03201	6.12672	5.86147	6.21221	7.52192	6.3663	7.93638	7.86973	7.61502	7.49951	8.19982	6.61617	7.31282	5.76447	6.6002
ATP8B1	8.72904	9.45877	9.1169	9.17502	8.84503	8.51471	8.86054	8.84904	9.2117	10.209	9.80261	9.25391	8.58226	9.43132	9.25473	9.37866	9.83352	9.29829	9.07486	8.85275	9.54883	9.32875	9.69953	9.09051	9.46738	9.71108	9.08111	8.85192	9.13549	8.97276	8.96633	8.85715	9.13931	9.59704	9.40214	9.68107	9.77249	9.60094	9.62548	9.41989	9.25686	9.49384	8.59893	8.87458	7.61168	8.93165	9.28307	10.7321	10.8258
ATP8B2	8.39023	8.07847	8.00929	7.84267	7.70605	8.09415	7.69881	7.59785	8.15456	7.99885	7.8811	7.86325	8.26512	7.95224	7.8961	7.85342	7.78682	7.68883	7.95172	7.75601	7.74223	8.03082	8.03189	8.04369	7.95224	7.89888	8.09446	7.68439	8.11012	7.95224	7.64558	7.90266	8.20871	7.91536	7.93176	7.7404	7.71006	7.9972	7.81768	8.06988	8.13703	8.16824	8.02047	7.90705	8.44061	8.26083	8.08422	8.33439	8.27835
ATP8B3	4.0439	3.84386	3.73327	3.92418	3.85659	3.64152	4.10379	3.97737	3.99284	4.00461	3.9153	3.88218	3.96715	3.96758	3.83389	3.91065	3.77367	3.9136	4.006	3.85757	3.92418	4.07796	3.78301	4.0797	3.92418	3.81638	4.10111	3.80531	3.76187	3.87873	3.96387	3.97607	3.92418	3.90839	3.85295	3.84268	3.81558	3.9939	3.80683	3.83198	4.38943	3.92418	4.07927	3.83794	4.06967	3.92418	4.09355	4.174	4.34506
ATP8B4	6.61643	7.62753	6.99862	6.01938	4.38523	6.5989	3.94748	5.87671	7.60842	7.06771	7.0347	6.32106	7.023	7.48447	7.11666	4.35926	4.10144	4.22236	4.42292	5.38052	4.12862	6.98728	4.62075	3.78081	5.40547	4.23594	4.21431	4.91302	7.25654	7.1841	4.81876	4.26584	4.07011	5.33456	5.14468	5.37376	5.08481	4.94158	5.70335	6.30574	3.91385	4.09872	3.9707	4.43424	4.34326	4.70062	4.67419	5.13813	4.91796
ATP9A	8.76758	8.34217	10.6953	9.77294	9.59036	9.34818	10.1038	8.22983	8.6863	7.92176	10.4551	10.2495	7.8909	7.65129	8.32539	10.5567	11.3053	10.2431	10.1943	10.7018	10.2826	9.75939	10.9089	9.77548	10.3034	9.59003	10.4209	10.6932	9.89704	9.05748	8.96841	10.5129	9.69851	10.4154	10.856	9.5838	10.102	10.7853	10.4636	8.55047	10.3016	10.5667	9.47896	9.58209	10.6242	9.30635	10.4174	8.81946	9.56955
ATP9B	7.75643	8.73082	8.76759	9.46303	8.37265	8.62519	8.93339	8.27053	8.34557	8.51053	8.32791	8.92764	8.77901	8.63228	8.62267	8.43957	9.49602	8.49134	8.64271	8.77028	8.11247	8.67622	8.9598	8.28277	9.28151	9.29789	8.42772	9.09315	8.70963	8.47229	8.29146	8.55132	8.3046	9.03477	8.75483	8.65165	8.92477	9.05722	9.07291	8.20988	9.0013	9.02399	8.42821	8.4562	7.93031	9.08748	8.72173	8.18598	8.15455
ATPAF2	6.76391	7.06618	6.88022	6.65445	7.28006	7.22577	6.51379	7.43864	7.15847	7.28918	6.47433	6.65501	7.22101	7.48734	7.08344	7.14094	6.80265	6.76325	7.21083	6.76989	6.30085	6.74916	6.85478	7.0855	6.76189	5.50693	7.21184	7.08686	7.06855	6.84578	7.27601	6.23101	6.79107	6.62167	6.79683	6.64423	6.77398	6.7308	6.91235	6.60703	6.68631	6.71769	6.98126	6.19865	6.93265	6.87819	6.89105	6.45861	6.53926
ATR	8.63081	9.07306	9.13693	8.91702	9.1756	9.21683	9.68766	8.85289	9.10814	8.8458	9.36191	9.34925	9.05075	9.20163	9.25595	9.35035	9.56914	9.38908	9.14145	9.25802	9.49906	9.34978	9.50182	9.65691	9.09839	9.2206	8.96297	9.4045	9.19339	9.13638	8.77163	9.0973	9.51965	9.17786	9.41414	9.28315	9.37328	9.21826	9.44935	9.17686	9.35036	9.38097	9.23106	9.46596	8.89676	9.31373	9.63758	8.68429	9.00585
ATRAID	10.757	10.9197	10.9934	11.0109	10.5621	11.2705	10.8731	11.2911	11.0686	10.7623	10.6951	10.389	11.0002	10.9478	10.8234	12.0113	10.6523	10.4512	11.6013	10.7001	10.946	11.2214	10.4827	10.9371	10.9299	10.7099	11.0882	10.9414	11.2684	11.0672	11.3124	10.9005	11.1355	10.5459	11.0433	11.1413	11.1086	11.3039	10.8873	11.0489	10.2983	10.8235	11.6462	10.9516	11.1294	11.1474	10.3993	11.0751	10.1837
ATRN	7.64101	8.41251	9.18051	8.85764	8.49567	8.7661	8.18183	8.52656	7.98409	8.09239	8.66057	8.51322	8.47737	8.39759	8.18008	8.60685	8.94609	8.71335	8.71989	8.94911	9.31686	8.63142	8.90128	8.51808	9.00287	8.5288	8.71769	9.34483	8.66944	8.66943	8.7869	8.82927	9.12369	8.67763	9.05869	8.75512	9.26565	9.42781	9.0044	8.38144	8.68803	9.15869	8.07411	8.27758	8.12507	9.22357	9.04551	8.49262	7.98309
ATRNL1	3.76047	4.50254	7.39431	6.37544	5.99626	5.63403	4.24291	5.31874	5.61288	4.11287	6.38325	4.89319	3.55449	4.16247	4.7648	4.29596	4.70721	6.33862	4.94137	5.77351	6.66981	6.96173	4.61381	6.5587	4.73912	4.41415	5.90682	6.93536	6.61448	6.70018	5.22759	5.73348	5.96525	4.29582	6.37977	5.38157	4.80749	4.54712	5.41796	4.70834	5.40619	3.80173	5.98139	4.7128	6.44718	7.29188	5.98074	4.42717	5.68064
ATRX	9.20129	9.67286	9.94394	10.2104	10.1113	9.53111	10.302	9.43058	9.63424	9.35394	10.1189	10.1864	9.51756	9.48298	9.62627	9.64292	10.3113	10.3316	10.114	10.2941	10.064	10.0051	10.4445	10.1732	10.0694	9.88313	10.3301	10.6069	9.95067	9.70456	9.59499	10.5984	9.87226	10.2099	10.3555	10.0662	10.1765	9.50696	10.1983	9.58117	10.3351	10.4457	9.41648	10.8953	10.4021	9.97416	10.4441	9.38418	9.83557
ATXN1	9.6927	9.93783	9.9777	10.3945	9.22277	10.2776	8.95949	9.21638	10.0712	9.97604	9.83612	9.17139	10.0863	10.0719	10.1539	9.68047	9.32523	9.32232	9.19748	8.89568	8.8342	9.92116	8.78974	9.01274	9.85297	8.98236	9.30971	9.16284	9.70122	9.76604	8.91324	9.03382	7.91773	8.89595	9.78089	9.42592	10.1147	9.74029	9.74626	9.85709	8.19317	9.46392	8.92463	9.54258	8.34281	9.32382	8.28732	9.62026	8.77982
ATXN10	10.7236	10.8323	11.193	11.3222	11.9351	11.1085	11.2217	11.0365	10.8028	10.7416	11.3396	11.374	10.8094	10.648	10.8016	11.7461	11.8253	12.1938	11.4718	11.5806	11.7898	11.0977	11.6397	11.899	11.4169	11.1339	12.0237	11.1165	11.2286	10.5283	11.1001	11.1034	11.4772	11.469	11.4398	11.1457	10.6574	10.9122	11.3255	10.9882	11.9151	11.6992	11.8224	11.9605	11.9937	11.7119	11.7205	11.2515	11.4703
ATXN2	7.27185	7.58163	7.92907	7.94406	7.92741	7.95401	8.03933	7.5718	7.58332	7.57807	7.98332	7.86234	7.49857	7.72581	7.52902	7.35443	7.90489	8.3223	7.74896	8.05359	8.28238	7.46541	8.27252	8.20985	8.40442	8.06522	7.77209	8.17951	7.78134	7.59149	7.63122	8.0144	8.11325	8.41807	8.03884	7.99654	7.85894	8.04314	8.0264	7.73723	8.41002	8.04542	7.63839	7.9439	7.67048	8.16605	8.03728	7.5036	7.73123
ATXN2L	6.30349	6.01096	6.02132	6.14542	6.0787	5.95437	6.36372	6.60755	6.55042	6.70946	6.46441	6.36047	6.16679	6.2517	6.31965	5.93614	6.293	6.41923	6.49753	6.35194	6.28003	5.90522	6.48037	6.53608	6.32079	6.54558	6.69037	6.2321	6.05624	6.41572	6.55855	6.30326	6.45852	6.22434	6.13343	6.06708	6.30456	6.42526	5.97268	5.8668	6.17966	5.72017	5.30625	6.18996	6.33207	5.98555	6.15647	6.04304	6.49266
ATXN3	7.88497	7.82426	7.73351	7.87071	8.37755	7.67811	6.99938	7.0969	7.98891	8.05303	8.11661	7.89379	8.02939	8.51424	8.11255	7.8076	8.51841	8.23899	7.70419	7.92717	8.00023	8.16478	7.91914	7.69085	8.14024	7.92704	8.12688	7.78905	7.958	7.85838	7.18084	8.56423	8.76724	8.25921	7.90967	7.86799	7.52725	7.2015	7.84535	7.52802	7.27268	7.9574	8.13652	7.66837	7.09285	7.82645	7.69871	6.70636	8.01657
ATXN3L	3.73447	3.5823	3.4872	3.61646	3.80759	3.62649	3.53946	3.87321	3.60211	3.87697	3.63212	3.76013	3.81336	3.71037	3.63837	3.68309	3.65886	3.71159	3.61151	3.52785	3.41959	3.54396	3.61818	3.51117	3.62042	3.68858	3.71647	3.5678	3.61426	3.50429	3.69538	3.57898	3.41104	3.41039	3.51989	3.39134	3.56889	3.54701	3.46721	3.63803	3.74219	3.52613	3.97546	3.75858	3.8831	3.65756	3.88265	3.96318	3.73464
ATXN7	9.71674	9.4041	9.14634	8.89363	8.49901	8.76577	8.47436	8.66963	9.38283	9.40607	9.38834	9.63342	9.41703	9.65734	10.156	8.43929	9.15262	8.88291	9.46996	9.34401	9.22865	9.83132	9.5003	9.40798	9.1782	9.03804	8.58771	9.34487	9.52297	9.39665	9.5969	9.28998	8.8333	9.96529	9.78877	9.86362	9.64465	9.35983	9.5106	9.46803	8.47176	9.0369	8.19942	8.92834	8.11259	8.76509	8.98464	8.94347	8.79795
ATXN7L1	4.97016	5.48047	4.65808	5.18902	4.36464	5.00248	4.80991	5.87052	4.97294	4.71481	4.75564	4.80736	5.01454	4.96679	4.91088	4.9693	4.69728	4.4786	5.25706	4.73193	4.65946	4.66009	4.71344	4.45089	4.74662	4.63637	4.62765	4.44864	4.86237	4.63182	5.6658	4.34613	5.41259	4.81538	4.48099	4.44939	4.62984	4.77333	4.47843	5.29426	4.80979	4.8041	5.03008	4.44181	4.94009	4.49234	4.78724	4.35558	4.31545
ATXN7L3B	8.39776	9.03903	10.0793	10.2937	10.0954	9.69257	10.3409	9.41449	8.86808	9.22947	9.64104	9.61154	8.29512	8.64719	8.91865	9.65405	10.3645	10.5003	10.3293	10.3034	10.3489	9.27515	10.251	10.8535	10.7432	10.2934	10.4421	10.2176	9.63074	9.43573	9.75691	10.5913	10.2278	10.6762	10.3525	9.77262	10.1994	10.4574	10.1416	9.40921	10.6098	11.0381	10.2296	10.0581	10.5161	9.87473	10.3281	9.56435	10.1042
ATXN8OS	5.20238	5.26335	5.00819	5.02921	5.12554	4.95673	5.19166	5.22923	5.16448	5.42676	5.07069	5.00448	5.14236	5.23019	5.06937	4.90374	5.01648	5.17964	4.88413	5.05147	4.80314	4.84469	4.97249	4.99249	4.97352	4.98509	4.93545	4.99973	4.82091	5.04989	5.0046	4.88317	5.00962	5.09577	4.91451	4.77553	4.77273	4.91377	4.85079	5.17794	5.11687	5.14968	5.13554	5.19433	5.19887	4.89974	4.98978	5.38294	5.21275
AUH	8.44064	8.80969	9.15128	9.41947	9.54309	8.99081	9.496	11.2279	8.91405	8.28349	8.883	9.41142	8.48472	8.88502	8.52312	10.1991	9.08175	9.34705	10.351	9.33816	9.76413	9.47207	9.47226	9.81688	8.9967	9.18058	9.22729	9.6033	9.25385	9.02939	10.8624	9.38079	9.25274	8.96647	9.01002	9.69053	9.92769	9.36229	9.38379	10.1453	8.7991	9.45578	9.72	9.69588	8.93479	9.12683	9.18503	9.60723	9.05186
AUNIP	5.27337	5.16571	5.30319	5.62025	7.18957	5.66667	7.69303	4.89586	4.5888	5.02664	5.74619	6.60398	5.39905	5.31989	5.37185	6.34248	6.39946	6.71896	6.03458	6.61604	6.93946	5.33602	6.5475	7.37178	5.83695	7.69549	7.10444	6.92206	5.30664	5.47736	5.31327	6.75407	8.06762	6.08444	5.51096	4.94437	5.57575	5.43163	5.68316	5.39348	8.07867	6.37623	6.95998	7.51176	7.20937	6.52261	7.36435	5.23245	7.66891
AUP1	9.08639	9.17267	8.76971	8.79406	9.38049	9.25069	8.9512	8.62655	9.12137	9.39245	8.805	9.09791	8.97119	9.2698	9.34165	9.03941	8.35301	8.91102	9.22529	8.86924	8.85033	8.97119	9.04227	8.98584	8.92954	9.28026	9.18381	8.92039	9.06604	8.93044	8.97119	9.07834	9.26521	8.76008	8.75885	8.72532	8.91328	8.7922	9.05837	9.2051	8.74676	8.77579	9.49197	8.52845	8.94428	9.09609	8.90586	8.85482	8.82908
AURKA	6.71069	6.80099	6.46755	6.74448	9.29916	8.28676	9.48426	6.55091	6.46194	6.59651	6.95201	7.8062	6.25099	5.41768	6.54424	8.23282	8.32522	9.1898	7.24401	7.88894	9.35839	6.33222	8.12955	9.38864	7.29824	9.57303	9.73683	8.33215	6.64416	6.78722	6.18191	8.82542	10.5326	7.04531	6.61492	6.61703	6.59689	6.66594	7.36429	5.91337	9.04734	7.48381	8.63899	9.07711	8.6161	7.91294	8.6365	6.00318	8.2148
AURKAIP1	9.74931	9.89232	9.63602	9.81338	10.4836	9.86748	10.174	10.5335	9.74231	9.8579	9.60509	9.7975	9.60379	9.6983	9.74311	10.3581	9.87972	9.57877	10.3614	9.9732	9.99703	9.64394	9.77492	10.2209	9.74101	10.2558	10.5452	10.0711	9.84892	9.92754	10.6009	9.48675	10.6496	9.7968	9.84734	9.92479	9.07079	9.50786	9.76475	10.0249	10.807	9.96466	10.6706	10.0649	9.71931	10.2984	10.2281	9.95693	9.9187
AURKB	5.77487	5.37297	4.85265	5.70373	8.92388	6.84037	7.75169	5.08129	4.96535	5.47827	6.17336	6.72826	4.64988	4.72515	5.06301	7.43079	7.29622	8.14986	6.41609	6.84625	7.33084	4.56813	6.93897	8.82224	5.92857	7.3974	9.07703	7.15798	5.78683	5.21717	4.63058	6.95985	7.88194	6.17993	5.99945	5.25731	5.13814	4.91466	6.21983	5.41413	8.48537	6.66771	8.06137	8.05895	8.00453	6.92884	8.22001	4.86823	8.3665
AURKC	6.69981	6.53409	6.32046	6.02001	6.44393	6.23808	6.10425	6.2307	6.41558	6.11394	6.24675	6.34689	6.39088	6.57682	6.27146	6.07407	6.19376	6.09448	5.95795	5.94228	5.85674	6.21447	6.23294	6.02332	5.98683	6.12457	6.36827	6.01154	6.01638	6.23593	6.08819	5.92049	6.1059	5.7037	6.11445	5.773	6.12232	6.42237	6.21656	6.51084	6.58325	6.07786	6.26248	6.31129	6.37777	6.39256	6.41158	6.20708	6.53988
AUTS2	10.1628	9.43588	11.3751	10.5333	10.8103	10.4799	10.9328	9.71215	9.10085	9.07747	11.4165	11.5473	8.90582	8.47847	9.59975	10.3176	11.7705	11.4103	10.9496	11.8979	11.4157	9.57986	12.121	11.1661	11.6569	10.9005	10.6926	11.2973	10.2243	8.85271	9.6707	10.8014	11.022	12.3795	11.2734	9.21183	9.65473	9.96771	11.0011	9.33183	11.7964	11.3391	10.3295	10.9099	9.94706	9.71161	11.827	9.15543	11.8277
AVEN	8.28838	7.41199	7.0988	7.03048	8.1176	7.82897	8.91226	6.78805	8.15282	8.219	7.34912	7.64225	8.16656	7.41289	7.61444	7.95191	7.08558	7.93717	7.2947	7.91319	7.41596	7.27576	7.63052	7.92209	7.53464	7.71006	8.15032	8.4658	7.16435	7.89763	6.27916	8.59692	8.29819	7.74126	7.47668	7.15479	7.92233	8.04678	7.32536	6.79985	7.7407	7.41373	8.11619	8.04289	6.79216	7.3297	7.57719	7.40746	7.61277
AVIL	6.21369	6.02607	5.96074	6.13355	5.69117	6.62535	5.67518	6.04094	6.28786	6.84307	6.21852	6.39651	5.93411	6.18378	5.62873	5.91731	5.81183	5.77485	6.40476	5.5303	5.18608	6.81523	6.18772	5.77909	6.04741	5.76785	5.51775	5.44318	6.25227	6.70889	6.66907	5.46999	5.00976	6.06916	6.03857	7.60869	5.67626	5.20733	6.27719	6.57525	5.52052	5.82417	5.68478	5.97053	5.96696	5.97106	5.71353	5.70987	5.92026
AVL9	7.69274	8.5931	8.93504	8.9266	8.74777	9.16232	9.75533	8.94859	8.5802	8.38613	9.09391	9.1706	8.50774	9.00654	8.56472	9.45175	9.2471	9.88148	9.00654	9.37734	9.34667	8.98623	9.30023	9.23751	9.30293	8.92591	8.08663	9.7587	8.94821	8.76599	8.89067	9.40853	10.024	8.28398	9.17111	8.9264	8.96832	9.00325	9.2555	8.97043	9.80118	9.30377	9.046	10.0427	8.71277	7.96924	9.85889	8.33378	8.29475
AVP	4.92378	4.8134	4.91542	4.72319	4.62734	4.82397	4.83932	5.20635	4.86283	4.95083	4.81665	4.84319	4.95555	4.84021	4.78909	4.81728	4.94754	4.87197	4.81124	5.01694	5.08731	4.57716	5.06322	5.02191	4.65884	5.10024	5.15819	4.85109	4.87988	4.82376	5.03091	4.97566	4.98382	4.84573	4.79705	4.85671	4.8444	4.91685	4.56259	4.6137	5.14198	4.82803	4.92321	4.68199	4.8177	4.59915	4.74042	4.81851	4.95769
AVPI1	9.42038	8.68229	7.56443	7.00162	6.77243	7.71453	7.22147	7.673	8.26084	9.69711	6.89227	6.95564	9.86281	8.73561	9.2506	6.55251	6.84321	6.62971	7.93103	7.1522	6.8446	7.78434	6.64408	6.6383	7.12205	7.39372	7.17202	6.83704	7.48278	7.55152	8.32853	6.91517	7.26129	7.18182	7.34056	8.22891	7.6057	7.10345	7.86679	7.69508	7.20613	7.08875	7.32799	6.90182	6.7957	7.87144	7.47729	7.89403	7.80015
AVPR1A	6.86579	6.54559	6.51902	6.62751	6.56536	6.43774	6.46842	6.50039	6.69133	6.62645	6.62645	6.75087	6.72443	6.16262	6.52023	6.78577	6.57074	6.35455	6.45002	6.65884	6.61594	6.36723	6.62645	6.80133	6.55679	6.4507	7.21616	6.4808	6.55106	6.78612	6.88796	6.45807	6.73809	6.77938	6.39191	6.56101	6.72727	6.47157	6.54533	6.60302	6.73879	6.69491	6.98141	6.67954	6.98573	6.77247	6.58242	7.06859	6.72061
AVPR1B	7.5586	7.2145	7.06779	7.16174	7.24667	7.04336	7.4503	7.50625	7.33647	7.57674	7.29273	7.18993	7.3941	7.31366	7.43088	7.17673	7.36367	7.34204	7.2166	7.31865	6.7611	7.07571	7.26221	7.27008	7.23555	7.37461	7.59596	7.08008	7.05525	7.37728	7.41402	7.18385	7.24444	7.01132	7.05618	6.98279	7.18088	7.3348	7.09572	7.29224	7.39193	7.31366	7.9482	7.718	8.09108	7.47924	7.34461	8.1066	7.77155
AVPR2	5.93543	5.84012	5.68992	5.66758	5.56291	5.99393	6.09694	6.394	6.0736	6.22366	5.66421	5.90062	6.0352	6.03301	6.176	5.79832	5.59058	5.69784	6.23495	5.91417	5.82638	5.71433	5.71712	6.10739	5.96079	5.94374	6.35634	5.945	5.80486	5.83784	6.49718	5.69905	5.9986	5.91417	5.75251	5.8972	5.85256	5.95822	5.67281	6.3129	5.97096	5.8542	6.02913	5.7889	5.94635	5.9115	5.85655	5.92247	6.21903
AXIN1	7.00344	6.89656	6.99093	6.9089	7.04125	6.819	7.15494	7.03897	7.02354	7.10469	6.72681	7.01381	7.02521	6.96813	7.02785	6.84975	7.03305	6.79079	7.07436	7.04166	6.51633	6.73255	7.06161	6.96879	6.64978	7.24061	7.11524	6.80179	6.82107	6.789	6.80851	6.95052	7.20827	6.8995	6.67239	6.59005	6.94256	6.75359	6.94256	7.20987	7.20569	6.98431	6.92725	6.97767	7.3744	6.94256	7.06504	7.37869	7.38557
AXL	10.4344	9.18914	9.75254	9.19559	7.34675	9.63303	6.48315	8.3959	9.33607	8.96378	8.97947	8.91634	10.0111	9.8137	10.0814	6.37026	6.67959	8.01172	7.47165	8.64775	7.89493	10.0484	6.83547	5.17723	8.74674	7.72622	6.47916	8.05973	10.0294	9.27533	8.07087	8.24327	7.0238	8.02861	9.08056	8.90581	10.0679	9.65284	9.81441	10.0961	6.56682	7.09409	6.94857	5.73579	5.91613	8.33323	7.51008	9.25869	6.12357
AZGP1	3.7422	3.47507	3.47258	3.87639	3.7369	3.681	3.73724	9.7345	3.91917	3.77128	3.46862	3.73397	3.73909	3.68125	3.59122	3.65284	3.68061	3.73806	7.45464	3.6327	3.76908	3.71722	3.7998	3.97313	3.80792	3.72653	4.15791	3.86107	3.66974	3.56557	8.91432	3.76373	3.70541	3.8036	3.55086	3.50025	3.86716	3.88679	4.59212	8.61792	4.07401	3.77733	3.61261	3.76306	3.89733	3.75493	3.91477	4.11417	3.86084
AZGP1P1	5.02237	4.80477	4.63041	4.79912	4.70323	4.76377	4.9177	5.57351	4.90665	5.19989	4.88762	4.85516	5.03574	4.96991	4.87949	4.7497	4.84912	4.82181	4.97957	4.67081	4.68966	4.7613	4.79318	4.72463	4.74516	4.7569	4.74245	4.69502	4.64557	4.65873	5.42676	4.94733	4.87431	4.72205	4.83925	4.80203	4.84939	4.55331	4.41564	5.26675	5.031	4.88673	4.89663	5.05095	4.81977	4.92384	5.02272	5.32785	5.02899
AZI2	8.87527	8.53448	8.59458	8.46927	8.11373	8.68098	7.8532	8.00084	8.6174	9.00416	8.21127	8.37253	8.65562	8.6365	8.97918	8.77013	8.13156	8.14276	8.38221	8.66743	8.67043	8.74541	8.48132	9.07307	8.49362	8.11864	7.92654	8.42479	8.82333	8.69274	8.09521	8.42042	8.0084	8.56379	8.6021	8.82219	8.95427	8.6531	8.86583	8.65351	7.92996	8.29961	8.8852	8.14953	8.33611	8.5482	8.18154	8.18045	7.86003
AZIN1	10.6022	10.4987	10.8635	10.3094	10.6552	10.761	10.8428	10.2767	10.8215	10.1925	10.9437	10.7307	10.6345	10.3475	10.6081	11.1022	10.8123	10.9296	10.6268	11.0294	11.5394	10.4525	10.7433	10.8666	10.9385	10.7924	10.9759	10.8831	10.569	10.3775	10.2144	10.884	11.287	11.3218	11.0505	10.1455	10.4978	11.4541	10.5993	10.145	10.9795	11.0436	11.0086	10.8107	10.8283	10.9437	11.0101	10.1254	10.423
AZU1	5.18667	5.18969	5.13093	5.03705	4.99187	4.90681	5.0732	5.33674	5.23929	5.03417	5.1203	5.07254	5.03197	5.04069	5.09621	5.06973	4.96913	5.03725	5.17502	5.17094	5.09133	4.87726	5.22767	5.11848	5.23377	5.09507	5.30923	5.0268	4.99916	4.96568	5.10629	5.03287	5.38395	4.94151	5.16982	5.04548	4.90242	5.02547	4.69653	5.11249	5.35263	4.93235	5.38084	4.85343	5.00147	5.12124	5.00487	4.7619	5.01547
B2M	14.7863	14.7346	14.3848	14.1279	13.1361	14.5198	12.3585	14.5974	14.6783	14.6048	14.3624	14.5073	14.7201	14.7671	14.7637	13.8471	13.4734	13.3137	14.1068	14.1262	13.6388	14.5532	13.3912	12.77	14.2894	13.2421	13.0763	14.0186	14.4486	14.5828	14.2422	13.495	12.9048	14.2342	14.1807	14.3514	14.2828	14.0274	14.4116	14.5164	11.3981	13.4171	13.4617	13.3771	13.3421	14.1279	13.2796	14.2542	13.9725
B3GALNT1	8.40969	7.86106	9.61326	9.02227	9.65243	8.98089	9.04383	8.37484	7.94531	8.16033	9.14518	8.7075	8.59159	8.18825	8.52692	10.019	9.68641	9.09377	9.00832	9.42969	9.49923	8.15919	9.37122	10.5106	8.96648	8.02695	8.96283	10.0419	8.66953	8.7616	8.61335	9.29513	9.45418	9.14299	9.17815	8.52276	8.47759	9.07489	9.0339	8.0354	8.96698	10.2996	10.0274	8.70699	7.8316	9.21506	9.24459	7.78289	9.18011
B3GALT1	4.08538	4.18806	4.25826	4.03124	4.10859	4.07	4.64954	4.38048	4.29963	4.34811	4.03587	4.04918	4.24164	4.00683	4.092	4.51343	4.16608	4.21066	4.06142	4.04297	4.14194	3.86189	4.20768	4.35251	4.2608	4.0887	4.21811	4.00076	3.95509	3.84727	4.19537	4.13504	4.08954	4.10064	4.12337	3.85053	3.9453	4.15249	3.87101	3.99263	4.02205	4.53989	4.11276	4.72016	4.46478	4.34032	4.13523	3.76927	4.11014
B3GALT2	4.48704	5.02174	5.6028	7.75419	9.54782	5.79113	4.34814	5.64383	5.68903	4.89494	9.40695	8.13624	4.95617	4.13139	5.43089	4.38868	10.31	5.70152	10.1662	9.80022	5.37613	5.86602	8.41667	8.29256	10.3484	5.15232	4.9188	10.3206	6.43076	7.33523	4.89963	7.03414	4.96613	8.85541	5.93993	4.73895	4.49876	4.93089	8.39643	4.79437	9.32679	6.42909	10.2198	8.83995	4.37129	4.96795	7.35482	4.75019	10.3784
B3GALT4	7.19243	7.19348	6.95769	6.85795	6.49174	7.20839	6.75547	7.03894	7.07756	7.20316	6.87761	6.65962	7.41058	7.70446	7.10758	7.11604	6.72414	6.48509	6.92713	6.9029	6.85393	6.95711	6.63962	6.76831	7.03979	6.99643	7.028	7.07238	7.05246	7.32286	7.15602	6.80814	6.87396	6.65856	6.95702	7.30673	7.2815	7.04979	7.03082	7.05369	6.50223	6.8413	6.55621	6.51204	6.4543	6.60751	6.50772	7.42468	6.50077
B3GALT5	4.12101	3.88535	4.10918	4.29356	4.24148	4.01728	4.09486	3.98206	4.13175	4.23459	4.18763	3.94136	4.18483	3.97072	4.03261	4.04003	4.22494	4.05321	3.92692	3.92015	3.97859	4.1936	4.04003	4.13508	4.11024	4.02791	4.06199	3.84165	3.84748	4.17829	4.09871	4.0146	3.8955	4.26888	3.9518	3.95087	3.77941	3.87418	3.80033	3.90095	4.1517	4.22407	3.99943	3.9851	4.1198	3.85432	3.9153	4.00393	3.74478
B3GAT1	6.47677	6.415	6.3129	6.40176	6.98471	6.24972	7.959	6.75136	6.4389	6.53616	6.4639	6.7425	6.70622	6.51555	6.33135	7.19849	7.15926	6.95226	6.76322	7.33822	6.27317	5.89021	7.43207	6.48099	6.78935	7.18204	6.91057	7.21358	6.47417	6.75319	6.57478	7.43012	6.91094	7.70394	6.78935	6.52139	6.76636	6.83682	6.53303	6.48823	7.9308	7.02482	6.95994	6.97399	7.18507	6.57316	7.43265	6.30222	6.65211
B3GAT3	7.22286	7.32453	6.89264	7.24779	7.3944	7.31657	7.33314	6.90898	7.0753	7.38748	7.06065	7.04266	7.17601	7.51156	7.17036	7.24397	6.956	6.98418	7.09268	7.29084	7.08553	6.95597	7.38786	7.17679	7.0573	7.74124	7.53547	7.58554	7.05804	7.50453	7.40067	7.57062	7.22286	7.02545	7.1578	7.17496	7.64622	6.9959	7.3806	7.18527	7.39858	6.96396	7.30109	7.42724	7.22286	7.35856	7.31072	7.38549	7.10485
B3GNT2	9.58759	9.61294	8.21464	7.7691	7.25796	8.4269	6.65231	8.79389	9.20539	9.06161	8.82925	9.0946	9.84001	10.3985	9.45882	8.80162	7.82015	6.60823	7.99736	7.78773	7.3728	9.12902	7.23184	6.66442	8.68668	5.59501	7.4234	6.87114	9.02839	8.93963	8.83999	7.82518	7.05931	8.1814	7.76415	8.91989	8.9324	8.30854	8.92964	8.18131	5.44278	7.58048	7.31782	5.25102	6.77771	7.40377	6.67034	7.5972	7.14516
B3GNT3	6.49574	6.21255	5.92903	6.15097	6.15084	6.16275	6.16614	6.65789	6.24458	6.45775	6.20327	6.2224	6.37693	6.39388	6.07035	6.19194	6.15084	6.25857	6.421	6.11027	6.18806	5.93371	6.14578	6.31141	5.99394	6.34314	6.51268	6.20417	6.22387	6.223	6.74357	6.25399	6.26964	6.2137	5.90023	5.89952	6.02758	6.04547	5.97841	6.34627	6.45331	5.7757	5.8654	6.22417	6.2985	5.957	5.96907	6.21972	6.03825
B3GNT4	7.21646	6.96974	6.77105	7.08725	7.0835	6.7332	7.11868	7.44829	7.01997	7.18978	6.90171	6.9767	7.13267	6.96225	7.04115	7.07968	6.99387	7.21857	7.22462	7.05989	6.78239	6.65701	6.94707	7.09045	6.77158	7.10264	7.11497	6.66131	6.87868	6.96145	7.29879	6.78822	6.75534	6.99387	6.90668	6.61	6.85547	6.80157	6.61521	7.1337	6.99387	6.95046	7.32095	6.93172	7.4309	6.94333	6.89738	7.43185	7.27497
B3GNTL1	6.53946	6.90101	6.73491	6.52302	7.05788	7.03313	7.15476	6.03375	6.95569	7.005	6.63847	6.54768	6.57055	6.98817	6.82457	6.86816	6.68423	6.68657	6.56887	6.78003	6.09118	6.50843	6.89944	6.88187	6.49161	6.53946	6.93309	6.8116	6.80683	7.01161	6.20539	7.17258	6.57592	6.32612	6.64143	6.40377	6.48973	6.30897	6.89704	6.68764	6.03473	6.76497	6.88385	6.10961	6.41014	6.63315	6.71895	6.27703	6.96789
B4GALNT1	5.93594	5.78359	5.385	5.42979	5.51538	5.36825	5.55237	5.54912	5.53672	5.7351	5.22468	5.57739	5.65246	5.75503	5.52795	5.39464	5.39892	5.37639	5.31608	5.37442	5.26843	5.32914	5.31639	5.13376	5.28778	5.70625	5.80695	5.32493	5.13991	5.57965	5.3771	5.50679	5.58609	5.52795	5.35339	5.51704	5.52795	5.35809	5.25533	5.60502	5.8025	5.69444	5.71294	5.76748	6.09058	5.96783	5.63884	6.17158	6.31861
B4GALT1	10.3403	9.8406	8.77199	9.65198	8.41127	9.41847	7.68262	9.13031	9.61357	9.64459	8.76348	8.8702	10.128	9.54265	10.0292	7.55825	7.91336	7.96491	8.90642	8.64716	8.46142	9.61355	7.94713	7.63456	8.43518	8.6707	8.14832	8.70013	9.49732	9.62647	10.0278	8.43588	7.68441	8.56574	9.18223	9.69215	8.90489	8.99049	9.09392	9.75436	7.61557	8.37889	7.67826	8.43071	7.68378	9.49175	8.48587	8.80778	8.51398
B4GALT2	7.37747	7.09078	7.11567	7.2151	7.30435	7.13824	7.18706	7.03892	7.11373	7.18117	7.27478	6.74629	7.17198	6.60956	6.94804	7.10247	7.46593	7.34508	7.19139	7.35954	7.41956	6.60919	7.46465	7.33573	7.16293	7.86124	7.38901	7.1363	7.02863	7.42591	6.96131	7.39169	7.83483	7.02904	7.35797	7.27757	7.11178	7.09421	7.13398	6.37392	7.73624	7.21163	7.08376	6.82571	6.90129	7.16802	7.34941	6.58951	7.0395
B4GALT3	8.24994	7.68663	7.58279	7.95162	8.88436	8.22164	7.69869	7.51371	8.16493	8.48169	7.86132	7.67725	7.8588	7.96099	8.41327	7.71117	8.10546	8.28887	8.26584	8.20593	9.11812	7.93788	8.01244	8.72154	7.82633	8.33879	8.50219	8.62297	8.07521	8.34467	8.37972	8.37194	8.99497	8.48945	7.7451	8.09486	8.72701	8.54364	8.08685	7.53599	7.6335	8.09664	7.68101	8.37073	8.02613	8.1667	8.13348	7.68069	8.07895
B4GALT4	8.74997	8.218	8.2542	8.59904	8.10479	8.11773	7.90573	8.71412	8.56447	8.40862	8.1659	7.98603	8.28502	7.88658	8.64437	7.92258	8.12599	8.0327	8.40521	8.1536	7.92206	8.03611	7.80133	8.523	8.055	7.69583	8.23274	8.9219	8.16459	8.84737	8.82965	8.42937	7.89809	7.80349	8.0409	8.40707	8.28065	8.11793	7.9587	8.1536	7.96461	8.07934	7.86818	7.99588	7.77837	8.40393	7.78699	8.20992	7.87828
B4GALT5	9.88938	9.38864	9.75112	9.93872	9.42269	9.62096	9.61587	8.78893	9.37318	9.96268	9.19293	9.24128	9.93714	9.87469	9.9376	9.42255	9.48135	9.3171	9.33557	9.41371	9.86706	9.56672	9.11144	9.54251	9.18168	9.5915	9.54687	9.69864	9.58966	9.8429	9.74856	9.66508	11.0743	9.6977	9.48335	9.26441	8.80041	8.97795	9.83362	9.4083	9.33704	9.46523	8.94653	8.87989	8.55534	9.78223	9.44453	8.60648	9.35874
B4GALT6	6.03402	6.1498	7.59444	7.31576	6.60399	7.52256	8.67162	6.28515	5.92179	6.39159	6.69668	6.80916	6.02187	4.82509	6.07504	7.22469	8.52417	7.87097	7.51926	6.90805	8.39887	6.11361	6.58691	7.26879	7.15303	6.58225	6.89802	7.05743	6.73925	6.83079	6.20252	7.56533	8.56855	6.87546	7.28884	7.19351	8.10563	6.049	7.0151	6.04536	7.44786	7.19247	7.6242	7.2773	7.34316	8.60818	7.61599	6.03032	6.08907
B4GALT7	7.51311	7.22963	7.57073	7.7081	7.53654	7.34073	7.43796	7.39448	7.54426	7.40404	7.37222	7.18054	7.63427	7.51895	7.42795	7.95763	7.66931	7.49173	7.94388	7.63074	7.59047	7.48345	7.6097	7.86159	7.55699	7.37998	8.11014	7.69093	7.62434	7.68975	7.4638	7.4668	7.24495	7.39258	7.72108	7.56127	7.6894	7.85407	7.63713	7.51463	7.87199	7.83353	7.93651	7.38427	7.56964	7.88435	7.586	7.58324	7.21478
B4GAT1	8.00122	8.55714	9.38466	9.59285	9.25689	8.71695	9.23766	9.53767	8.21963	7.94599	8.89984	8.8543	8.15991	8.19246	7.6731	9.91767	9.36653	9.56091	9.51025	9.69405	9.44995	8.61225	9.4923	9.53669	8.99757	9.1242	9.49008	10.6266	8.97786	9.01476	9.5155	9.53014	9.80678	8.93748	9.63591	9.93001	10.3235	9.82713	9.41658	9.14881	9.88429	10.1336	9.74599	9.20878	8.97948	9.58061	9.73309	9.84906	8.8938
B9D1	6.25091	6.42271	6.45976	6.49196	7.47286	6.56306	6.83099	7.55858	6.4243	5.94203	6.66864	6.78827	6.61933	6.06346	5.92269	8.94859	7.38899	7.2012	7.96381	7.26753	6.35493	6.43353	6.81668	8.25774	7.40394	6.30765	7.90687	7.89112	6.80182	6.90769	7.56986	6.24792	7.18316	6.96532	7.78932	8.05213	7.68936	7.60863	6.86053	6.70705	8.16232	7.69768	8.75816	6.89636	7.67476	7.91261	7.64354	8.06915	7.1792
B9D2	7.27632	6.96763	6.76335	6.61871	7.36356	6.91306	7.04373	7.13654	7.00048	7.00837	6.76625	6.67586	7.04471	7.09048	6.99036	7.415	7.28683	7.22245	7.32182	6.90131	7.14426	6.88661	7.07928	7.3469	7.26414	6.76275	7.7107	7.14536	7.09067	7.13388	7.30876	6.86662	6.97251	7.27948	7.00735	7.22075	7.28811	7.59889	6.79364	7.02367	7.80671	7.33117	7.45484	6.83877	7.11291	7.0325	7.11794	7.42649	7.10154
BAALC	4.11343	4.58063	4.3753	4.33912	4.57606	4.62833	4.38138	4.10985	5.0792	4.52617	4.25527	3.95702	5.15604	4.32064	3.90536	4.22507	3.96867	4.2694	4.24006	4.30223	4.58823	4.0565	4.16134	4.23266	4.28969	4.89881	4.60531	5.26615	4.33349	5.04386	4.67962	4.40558	4.42741	4.46425	4.52938	5.22144	5.3025	7.25082	4.9311	4.79804	4.96458	4.69442	4.34698	5.36951	4.51785	4.44374	4.44521	4.65109	4.23189
BAAT	5.70594	5.80362	5.69322	5.58309	5.72956	5.51213	5.74947	5.84182	5.73127	5.88555	5.54884	5.41932	5.54093	5.51355	5.86455	5.35249	5.43766	5.56154	5.65913	5.73255	5.62833	5.32775	5.78155	5.65416	5.57358	5.97381	5.98313	5.87013	5.46084	5.43854	5.98224	5.67816	5.60694	5.4657	5.59592	5.50946	5.63591	5.54426	5.55742	5.83077	5.93292	5.66974	5.70872	5.71718	6.02775	5.56125	5.59053	5.87997	5.6566
BABAM1	9.28444	9.34677	9.40882	9.42649	9.86574	9.29049	9.8581	9.32491	9.57007	9.56196	9.3367	9.49988	9.23119	9.19579	9.33405	9.74973	9.75905	9.65968	9.65953	9.64007	9.59416	9.20214	9.57097	9.94409	9.61604	9.66571	10.0768	9.68489	9.59175	9.47343	9.25292	9.89912	9.36531	9.24336	9.40322	9.06025	9.43955	9.67174	9.41678	9.23742	10.0303	9.39791	10.1325	9.71295	9.60201	9.56524	9.56511	8.96781	9.54692
BABAM2	8.81251	8.86459	8.85905	8.91859	9.00934	9.03996	9.18694	9.20357	9.08047	8.47957	8.21511	8.40694	8.82537	8.60494	8.81127	8.30765	8.4228	8.46177	8.7059	8.61103	8.75421	8.52787	8.23939	8.5188	8.47048	9.01303	8.61855	8.59373	8.58326	8.79988	9.14845	8.23206	8.55328	8.05627	8.72187	9.03745	8.39211	8.63002	8.44984	8.75999	8.74612	8.5363	8.13764	8.22893	8.69501	8.89379	8.3019	8.62844	8.16248
BACE1	8.571	7.95322	8.41736	8.82593	7.58544	8.14901	7.60652	7.83023	8.53317	7.9544	8.73011	7.96242	8.54516	7.55661	8.51209	8.5225	8.22715	7.80109	8.30346	8.84885	7.5707	8.52597	8.27776	7.78366	8.47641	7.65447	8.09054	8.73483	8.33535	8.89173	8.08588	8.50667	7.7994	7.99021	8.89456	9.49695	8.81903	7.54445	8.67974	8.05705	7.82844	8.52399	7.8955	7.49768	7.57259	8.51274	8.26035	8.07024	7.26806
BACE2	8.88312	8.68473	7.85423	7.89299	8.38622	8.07877	6.18519	8.37665	8.58965	7.63764	7.65912	7.63435	8.47042	7.66468	7.77158	6.66879	8.1689	7.54416	8.10003	7.60134	7.42956	7.96574	7.14919	7.77212	7.71609	7.43738	8.869	7.18009	7.92181	8.7587	8.46683	7.38472	8.25257	7.50574	7.78756	7.59973	7.14297	7.30962	7.60961	7.86614	6.9887	7.33851	7.4216	6.97855	7.20032	8.49505	7.60511	6.7623	7.6026
BACH1	10.4735	10.1494	10.231	9.91659	9.6893	9.85979	9.76134	8.89195	10.3283	10.7285	9.40031	10.3466	10.2528	10.2026	10.8329	9.06885	9.35084	10.0587	9.05319	10.0471	10.1654	9.92046	9.65613	10.1742	10.4412	8.95509	9.96475	10.0727	9.98478	10.1604	9.26663	9.82551	10.2252	10.0474	9.85117	9.19289	8.84273	9.2784	9.75076	9.1929	9.61553	9.11125	8.58642	10.3777	9.90167	9.62984	9.38685	9.00436	9.58533
BACH2	6.34675	6.0681	8.63226	8.24422	8.99811	7.89606	9.28209	4.98995	5.87573	6.55326	8.21454	10.065	5.6079	4.68155	7.18568	6.27405	8.18653	9.87314	7.49887	10.0409	10.4961	6.50028	9.88098	9.4884	9.81938	9.62892	8.35661	10.2206	7.54223	6.67066	4.92238	9.03885	8.43571	9.60182	8.70558	5.29814	5.1566	6.96621	7.75859	6.14944	8.86693	8.81004	7.02293	8.72211	8.99015	7.43175	10.0597	5.22089	8.15204
BAD	7.53432	7.29785	7.81525	7.61451	7.83407	7.54492	7.66647	7.70688	7.40509	7.0732	7.54253	7.1386	7.4081	7.13412	7.18197	7.97256	7.77877	7.70992	7.90621	7.82737	7.43463	7.3924	7.34876	7.6807	7.19135	7.58895	8.2828	7.57626	7.55861	7.54581	7.68177	7.80919	7.36507	7.29147	7.65203	7.8838	7.82704	7.65876	7.19555	7.6424	7.92101	7.96559	8.27059	7.44193	7.50301	7.91676	7.43753	7.86784	7.36289
BAG1	9.33564	9.0695	8.71004	8.87878	9.14641	9.01381	8.67238	9.68662	8.95582	8.8827	8.84145	8.81494	9.04303	9.07926	9.13522	9.25086	8.57645	8.78125	9.47665	8.90832	9.08896	9.13618	8.69896	8.88077	8.74618	9.30959	8.96502	9.10551	9.13327	9.29915	10.2834	8.79247	8.91379	8.46525	9.27687	9.32923	9.43705	9.21127	9.08967	9.21178	9.41856	8.84609	9.12339	8.67693	8.54965	8.20623	8.62938	8.82295	8.14748
BAG2	9.60123	9.08667	8.23837	10.2842	6.9041	9.23774	8.60538	7.52999	9.13332	9.4431	7.99312	8.60764	8.68738	7.59299	9.49799	7.25101	6.56019	7.24481	7.30557	7.28336	8.54442	9.39062	6.36939	6.51624	8.22387	7.53387	6.69539	7.48404	7.96799	9.38175	7.08764	7.69771	8.99846	6.69328	7.71139	7.58826	5.42004	7.37052	7.27856	7.4546	6.34078	7.52075	7.19897	6.00632	5.91888	8.13284	8.06237	7.10714	5.69506
BAG3	11.9051	9.71394	10.0278	9.60664	10.1349	10.3478	9.90902	10.6701	10.1401	11.3445	9.71993	10.0044	11.1569	9.21393	10.5789	9.20486	10.5022	9.78809	10.0727	10.1736	10.5409	9.53106	9.72267	9.72626	9.51151	10.4552	10.6876	10.475	9.80768	10.1044	11.418	9.89558	10.6059	10.1154	10.1873	9.96054	10.5303	9.74037	9.93842	9.34895	9.60588	9.95541	9.68276	9.30157	9.2994	10.3632	10.0601	9.95658	9.76078
BAG4	6.10006	5.97126	5.93298	5.57625	6.18665	6.39763	5.28481	5.4517	5.8425	5.84664	5.39027	5.52278	6.2608	6.31506	6.0114	5.59674	6.53096	5.34205	5.34307	5.36755	5.72908	5.78925	4.86639	5.22039	5.07315	5.78095	6.20865	5.66937	5.37522	5.62476	5.50157	5.70448	6.22728	5.73126	5.05045	5.1352	5.34359	5.36939	5.61481	5.4144	5.23592	5.13222	6.03333	5.33544	5.04903	5.26604	4.96617	4.82641	4.9992
BAG5	9.38389	9.44974	9.58387	9.43603	9.64497	9.52365	9.19738	9.40156	9.10425	8.89482	9.13005	9.3902	8.95296	8.97322	9.46615	9.27995	9.98857	9.46626	9.42441	9.38091	9.55359	9.4473	9.1283	9.17137	9.12575	10.1227	9.60204	9.58723	9.4611	9.26186	9.58973	9.72654	9.98726	9.23839	9.78416	9.69071	9.93547	9.56474	9.35072	9.28891	9.73724	9.67469	9.21568	9.19616	8.46319	9.40578	9.61568	9.67924	8.96617
BAG6	8.86792	9.24685	9.06941	9.88854	9.99964	9.48283	9.66209	9.01415	9.13417	9.12053	8.89327	9.08605	9.06137	9.16992	9.30013	9.07453	9.41927	9.45309	9.64526	9.57142	9.72362	9.34382	9.67523	10.1379	9.54156	10.9481	10.081	9.93595	9.33398	9.2598	9.60073	9.74636	10.1782	9.40788	9.4225	9.57758	9.78519	9.43976	9.55104	9.31853	10.2962	9.39758	9.19439	9.75494	9.74642	9.68428	9.79543	9.05324	9.33245
BAGE	3.97508	4.17404	4.22843	3.82667	4.25191	4.22843	4.24736	3.8951	3.99989	3.89678	4.01256	4.19424	4.0526	3.87724	3.8951	3.6998	4.10402	3.87221	4.02547	4.03918	4.06395	4.43999	3.93753	4.16069	3.97286	3.79662	4.17399	4.03988	3.91227	3.97222	3.70574	4.17574	4.26747	3.90077	4.06174	4.01542	3.91636	3.94185	3.85868	3.87764	4.04297	3.95183	3.79463	3.77874	5.02275	3.95418	3.97672	3.88699	3.91806
BAHCC1	6.89615	7.18518	7.41473	7.24499	8.52951	7.11666	7.89673	7.02592	7.34843	6.9981	7.66953	7.76602	6.80793	6.88077	7.00087	7.86644	8.6306	8.36516	7.78195	8.6	8.09037	7.13315	8.56772	8.15397	8.31353	8.9826	8.73548	8.83324	7.55987	7.37353	6.46872	8.61661	8.25805	8.21526	8.10642	7.53233	7.71084	7.57059	8.10711	7.05306	8.91675	8.47483	7.74093	9.13031	7.41419	7.69496	9.34761	7.06956	8.36561
BAHD1	7.91087	7.87991	7.59843	8.0037	8.22776	7.69682	7.95158	8.04475	7.5628	7.76177	7.7453	7.85588	7.83841	7.88083	7.85548	7.81042	7.84751	7.48732	8.24941	8.28423	8.0037	7.90652	8.45898	7.71519	7.8625	8.4967	7.6132	8.88853	7.74829	7.8577	8.36686	8.59494	7.92972	8.04754	8.04594	7.96549	8.16021	8.5181	8.06352	8.20073	8.80346	8.44427	8.22307	8.05215	7.80136	8.02884	8.59377	8.11967	7.51831
BAIAP2	7.81649	6.82577	6.29147	6.44781	6.56779	6.42007	6.53499	7.42025	6.60596	6.82917	6.14765	6.38927	7.18114	7.07303	7.29056	6.48388	6.19745	6.08887	6.4786	6.67781	6.10442	6.64807	6.49925	6.14222	6.57892	6.77518	6.68699	6.51837	6.45846	6.64372	6.94683	6.53099	6.3925	6.4119	6.63781	6.75595	7.32158	6.67065	6.8094	7.15829	6.74149	6.70471	6.86342	6.95334	6.89616	7.09009	6.74526	6.76126	6.80264
BAIAP2L2	3.84837	3.65642	3.81748	3.87513	3.76093	3.70718	4.09312	4.06882	3.806	3.92717	3.74473	4.07266	3.92836	3.93915	3.87971	3.86934	3.87513	3.8676	3.92655	3.74143	3.79813	3.91555	3.74485	3.71188	3.75267	3.83701	3.87513	3.83383	3.87108	3.90914	3.85422	3.63283	3.76171	3.93624	4.09447	4.01219	3.93285	3.74207	4.02078	3.94433	3.75109	3.95888	4.08386	4.00476	4.02994	3.76944	3.88417	3.73844	4.11981
BAIAP3	7.04093	6.60286	6.64165	6.38909	6.63129	6.5073	6.62118	6.97252	6.82768	6.83366	6.62477	6.66694	6.94753	6.70761	6.61167	6.71505	6.76273	6.69948	6.90213	6.59072	6.78334	6.78674	6.71008	6.79626	7.06172	7.13128	6.96844	6.4708	6.9049	6.85734	6.98701	6.81941	6.78334	6.56051	6.75933	6.4709	6.7601	7.36916	6.64072	6.95085	6.43947	7.2562	6.97367	6.86072	6.88131	6.70887	7.07969	6.9331	7.13356
BAK1	7.11048	6.98011	6.62042	7.05389	7.24124	7.01657	7.35089	6.84445	6.9948	7.04414	6.82293	6.78678	7.52353	7.33004	7.19851	7.56153	7.03871	6.8417	7.04357	7.01969	6.84095	6.84865	6.93743	7.23309	6.99633	7.17305	7.15773	6.53784	6.74713	6.92835	6.96645	6.80632	6.99054	6.90671	6.69204	6.65687	6.70216	6.89249	6.86085	7.1019	7.38156	7.07511	7.35804	7.09948	7.36386	7.28827	7.2131	6.91714	7.12072
BAMBI	7.97832	7.92092	9.35971	9.78391	9.24111	8.79994	9.2242	8.56248	8.86616	8.52972	9.23551	8.98156	7.4814	7.19504	8.72004	8.70239	9.04487	9.14669	8.76716	9.08537	8.8565	8.99515	8.59177	5.94977	8.70942	9.15913	8.45181	8.93094	9.59176	10.1404	8.8308	10.1474	8.48393	8.09123	9.4019	7.21292	5.34843	9.08102	8.93715	8.10046	7.90218	10.8843	8.36936	8.05353	7.54369	9.33147	8.58441	6.98923	7.7416
BANF1	7.42862	7.48111	7.76671	7.87442	8.30129	7.49426	8.34327	7.4275	7.299	7.55466	8.00579	7.86077	7.42552	7.30846	7.47196	8.50474	8.46046	8.42272	7.87996	8.42205	8.25437	7.56316	8.34755	8.39016	8.14186	8.57551	8.71984	8.15142	7.75862	7.58029	7.58772	8.62421	8.74109	8.24436	8.04104	8.08174	8.45452	8.24207	7.7629	7.26813	8.34099	8.4675	8.92676	8.53417	8.51266	8.18702	8.76332	8.51646	8.58193
BANK1	5.58168	5.47319	7.28108	5.56146	5.1551	5.72924	5.22581	6.11826	6.23563	6.10392	5.09481	4.67133	6.26411	5.11026	5.94879	5.04213	5.6683	5.45522	5.80859	5.14709	5.83425	5.91414	4.76229	5.53279	5.14769	5.09742	5.37717	4.87675	6.5993	6.24988	5.82367	4.75624	4.85921	5.35247	5.50857	8.11499	9.13332	4.97536	5.8225	6.26983	4.35454	6.01598	5.6948	4.71988	5.15868	5.00394	4.66647	5.52303	6.285
BANP	8.71127	8.67604	9.20355	9.07294	9.01862	8.78659	9.45316	8.68732	8.9992	9.82304	9.31203	9.07661	8.75782	8.7907	8.8221	9.04727	9.46119	8.81546	9.13221	9.50079	9.14703	8.77873	9.43889	9.13157	9.30351	9.1578	9.314	9.38517	9.11928	8.82553	8.97836	9.36443	9.2329	9.15552	8.95793	8.91075	8.78236	9.15652	9.09045	8.50954	9.17482	9.06357	9.24119	8.40726	8.86447	8.93727	9.10678	8.81402	8.91303
BAP1	8.1737	8.06459	7.87134	8.21766	8.55065	7.99833	8.15014	7.80632	8.0777	7.92988	7.96905	7.84871	7.92182	7.86776	7.95843	8.01496	8.22434	8.1321	8.37347	8.41564	8.26634	7.82145	8.39702	8.82572	8.02754	8.96979	8.6406	8.40214	8.23171	8.00217	8.23567	8.50859	8.33724	8.19489	8.3543	8.21763	8.32254	8.2683	8.55882	8.23927	9.27629	8.58858	8.27245	8.208	8.00055	8.51616	8.60773	7.97851	8.21694
[truncated: 11,399 more rows]
[truncated: 4 more columns]
