# Supplementary material for: Characterization of Continuous Transcriptional Heterogeneity in High-Risk Blastemal-Type Wilms’ Tumors Using Unsupervised Machine Learning
Source: Int J Mol Sci. 2023 Feb 9;24(4):3532. doi: 10.3390/ijms24043532 (PMC9965420; doi:10.3390/ijms24043532)
Supplement: Supplementary file 1 [file ijms-24-03532-s001.zip › Table S2 - integrated metadata.xlsx]

## Sheet: Sheet1
WT number	Exome	RNAseq	mRNA array	miRNA array	sex	age (months)	bilateral / relapse	histological type	stage	metastasis at diagosis	relapse / metastasis	death	active disease	follow-up < 2 yrs	mutation		DKFZ identifier						DKFZ identifier from gene expression matrix	Sample GEO accession from gene expression matrix						Sample GEO accession from GSE53224 series matrix	Sample characteristics from GSE53224 series matrix (gender)	Sample characteristics from GSE53224 series matrix (histology)						Notes
WT055			x	x	female	101		necrotic	3	y	y	-	y	-			1079						dkfz1079	GSM1287918						GSM1287918	female	completely necrotic
WT056			x	x	male	124		regressive	3	y	y	y	-	-			1080						dkfz1080	GSM1287919						GSM1287919	male	regressive
WT057			x	x	female	41		stromal	1	-	-	-	-	-			1081						dkfz1081	GSM1287920						GSM1287920	female	stromal type
WT058			x	x	female	35		mixed	2	-	-	-	-	-			1082						dkfz1082	GSM1287921						GSM1287921	female	triphasic
WT059			x	x	female	43		blastemal	3	-	-	-	-	y	SIX2 c.A530G, p.Q177R (het)		1083						dkfz1083	GSM1287922						GSM1287922	female	blastemal
WT060			x	x	male	27		mixed	1	-	-	-	-	-			1084						dkfz1084	GSM1287923						GSM1287923	male	triphasic
WT061			x	x	female		relapse	diffuse anaplasia	3	y	y	y	-	-			1085						dkfz1085	GSM1287924						GSM1287924	female	diffuse anaplasia
WT062			x	x	male	58		regressive	1	-	-	-	-	-			1086						dkfz1086	GSM1287925						GSM1287925	male	regressive
WT063			x	x	female	4		mixed	1	-	y	-	y	-			1087						dkfz1087	GSM1287926						GSM1287926	female	triphasic
WT064			x	x	male	37		mixed	3	-	-	-	-	-			1088						dkfz1088	GSM1287927						GSM1287927	male	triphasic
WT065			x	x	male	22		mixed	1	-	-	-	-	y			1089						dkfz1089	GSM1287928						GSM1287928	male	triphasic
WT066			x	x	female	45		regressive	1	-	-	-	y	y			1090						dkfz1090	GSM1287929						GSM1287929	female	regressive
WT067			x	x	female	60		regressive	-	y	-	-	-	y			1091						dkfz1091	GSM1287930						GSM1287930	female	regressive
WT068			x	x	female	42		necrotic	1	-	-	-	-	-			1092						dkfz1092	GSM1287931						GSM1287931	female	completely necrotic
WT069			x	x	male	116		regressive	2	-	-	-	-	y	MYCN c.C131T:p.P44L (het)		1093						dkfz1093	GSM1287932						GSM1287932	male	regressive
WT070			x	x	male	6		epithelial	1	-	-	-	-	-			1094						dkfz1094	GSM1287933						GSM1287933	male	epithelial type
WT071			x	x	female	148		regressive	1	-	-	-	-	y			1095						dkfz1095	GSM1287934						GSM1287934	female	regressive
WT072			x	x	female	29		mixed	1	-	-	-	-	y	DROSHA c.G3439A:p.E1147K (het)		1096						dkfz1096	GSM1287935						GSM1287935	female	triphasic
WT043	x	x	x		female	22	bilateral	blastemal	3	y	y	y	-	-			1120						dkfz1120	GSM1287936						GSM1287936	female	blastemal
WT012	x	x	x		male	12	-	blastemal	1	-	-	-	-	-			1122						dkfz1122	GSM1287937						GSM1287937	male	blastemal
WT033	x	x	x		male	52	-	diffuse anaplasia	2	-	y	y	-	-			1124						dkfz1124	GSM1287938						GSM1287938	male	blastemal
WT002	x	x	x		male	82	-	regressive	1	-	y	-	-	-			1127						dkfz1127	GSM1287939						GSM1287939	male	regressive
WT029	x	x	x		male	8	-	blastemal	1	-	-	-	-	-			1129						dkfz1129	GSM1287940						GSM1287940	male	blastemal
WT047	x	x	x		male	34	bilateral	blastemal/focal anaplasia	1	-	-	-	-	-	SIX1 c.A530G, p.Q177R (hom)		1130						dkfz1130	GSM1287941						GSM1287941	male	blastemal
WT035	x	x	x	x	male	41		blastemal	1	-	-	-	-	-			1133						dkfz1133	GSM1287942						GSM1287942	male	blastemal
WT030	x	x	x		female	66	-	diffuse anaplasia	3	-	y	y	-	-			1134						dkfz1134	GSM1287943						GSM1287943	female	blastemal
WT048	x	x	x		male	31	bilateral	blastemal	2	y	-	-	-	-	SIX1 c.A530G, p.Q177R (het)		1135						dkfz1135	GSM1287944						GSM1287944	male	blastemal
WT010	x	x	x	x	female	78		blastemal	1	-	y	-	-	-	DGCR8 c.243_244insT:p.K82X (hom)		1136						dkfz1136	GSM1287945						GSM1287945	female	blastemal
WT003	x	x	x	x	male	9		blastemal	1	-	-	-	-	-	DICER1 c.G5656A:p.G1886R * (het)		1138						dkfz1138	GSM1287946						GSM1287946	male	blastemal
WT049	x	x	x	x	female	146		blastemal	2	-	y	-	y	y	DGCR8 c.G637T:p.E213X (het)		1139						dkfz1139	GSM1287947						GSM1287947	female	blastemal
WT042	x	x	x	x	male	41		blastemal	2	y	-	-	-	-	DIS3L2 c.C2479T:p.Q827X * (het)		1140						dkfz1140	GSM1287948						GSM1287948	male	blastemal
WT016	x	x	x	x	female	44	bilateral	blastemal/regressive	1	-	-	-	-	-	DGCR8 c.G1552A:p.E518K (hom)		1141						dkfz1141	GSM1287949						GSM1287949	female	blastemal
WT052-T1	x	x	x	x	female	88		blastemal	3	y	y	y	-	-	MYCN c.C130A:p.P44T & c.C131T:p.P44L (hom)		1142						dkfz1142	GSM1287950						GSM1287950	female	blastemal
WT054	x	x	x	x	male	23	bilateral	blastemal	3	y	-	-	-	-			1144						dkfz1144	GSM1287951						GSM1287951	male	blastemal
WT038-T2	x	x	x		female	50	bilateral	blastemal	1	-	-	-	-	-	MYCN c.C131T:p.P44L (het)		1146						dkfz1146	GSM1287952						GSM1287952	female	blastemal
WT004-T1	x	x	x	x	female	82	multifocal	blastemal	1	-	-	-	-	y			1149						dkfz1149	GSM1287953						GSM1287953	female	blastemal
WT024	x	x	x		female	29	bilateral	blastemal	3	y	y	y	-	-			1154						dkfz1154	GSM1287954						GSM1287954	female	blastemal
WT073			x		female	153	-	blastemal	1	-	-	-	-	-			1158						dkfz1158	GSM1287955						GSM1287955	female	blastemal
WT001	x	x	x		female	25	-	blastemal	1	-	-	-	-	-			1160						dkfz1160	GSM1287956						GSM1287956	female	blastemal
WT038-T1	x	x	x		female	50	bilateral	blastemal	1	-	-	-	-	-			1224						dkfz1224	GSM1287957						GSM1287957	female	blastemal
WT074			x		female	23	-	blastemal/xenograft	3	-	-	-	-	y			1225						dkfz1225	GSM1287958						GSM1287958	female	blastemal
WT004-T2	x	x	x		female	83	multifocal	blastemal	1	-	-	-	-	y			1226						dkfz1226	GSM1287959						GSM1287959	female	blastemal
WT075			x		female	5	-	blastemal before chemoth.	1	-	-	-	-	-			1227						dkfz1227	GSM1287960						GSM1287960	female	blastemal
WT014	x		x	x	female	55		blastemal	2	-	-	-	-	-	SIX2 c.A530G, p.Q177R (het); DROSHA c.G3439A:p.E1147K (het)		1242						dkfz1242	GSM1287961						GSM1287961	female	blastemal
WT026	x		x		female	20	-	blastemal	1	-	-	-	-	-			1243						dkfz1243	GSM1287962						GSM1287962	female	blastemal
WT025	x	x	x		female	109	-	blastemal	1	-	y	-	-	y			1244						dkfz1244	GSM1287963						GSM1287963	female	blastemal
WT036	x	x	x		male	35	-	blastemal	1	-	-	-	-	-			1245						dkfz1245	GSM1287964						GSM1287964	male	blastemal
WT037	x	x	x		female	133	-	blastemal	1	-	-	-	-	-	DIS3L2 c.A410G:p.Y137C * (het)		1247						dkfz1247	GSM1287965						GSM1287965	female	blastemal						Outlier, removed from PCA analysis
WT044-T1	x	x	x		male	45	-	regressive	1	-	y	-	-	-			1248						dkfz1248	GSM1287966						GSM1287966	male	regressive
WT044-T2	x	x	x		male	54	relapse	blastemal	1	-	-	-	-	-			1250						dkfz1250	GSM1287967						GSM1287967	male	blastemal						Outlier, removed from PCA analysis
WT076			x		male	125	-	blastemal	3	y	y	y	-	-			1251						dkfz1251	GSM1287968						GSM1287968	male	blastemal						Outlier, removed from PCA analysis
WT022	x	x	x		female	85	-	blastemal	3	-	-	-	-	-			1252						dkfz1252	GSM1287969						GSM1287969	female	blastemal
WT045	x	x	x	x	female	26		blastemal	2	-	-	-	-	y	DROSHA c.G3664A:p.E1222K (het)		1253						dkfz1253	GSM1287970						GSM1287970	female	blastemal
