# Supplementary material for: Characterization of Continuous Transcriptional Heterogeneity in High-Risk Blastemal-Type Wilms’ Tumors Using Unsupervised Machine Learning
Source: Int J Mol Sci. 2023 Feb 9;24(4):3532. doi: 10.3390/ijms24043532 (PMC9965420; doi:10.3390/ijms24043532)
Supplement: Supplementary file 1 [file ijms-24-03532-s001.zip › Table S3 - selected genes for heatmap.xlsx]

## Sheet: __ Table S3 - selected_genes
Selected genes	Assumed annotation in the fetal kidney
ACTA1	Un-induced mesenchyme, Muscle
ACTA2	Un-induced mesenchyme, Muscle
ACTB	Housekeeping gene
ADGRE1	Macrophages
ADRB1	Juxtaglomerular cells
ALDH2	Protects against acute kidney injury
AQP1	Proximal tubule
AQP2	Collecting duct
C1QA	Macrophages
C1QB	Macrophages
CCL2	Monocytes (later become Macrophages)
CD14	Monocytes (later become Macrophages)
CD19	B cells
CD34	Endothelial cells
CD3D	T cells
CD3E	T cells
CD3G	T cells
CD4	T cells
CD40	Dendritic cells
CD79A	B cells
CD79B	B cells
CD8A	T cells
CD93	Endothelial cells
CDH1	Distal tubule
CDH11	Un-induced mesenchyme, Cap mesenchyme
CDH5	Endothelial cells
CDH6	Proximal tubule
CITED1	Cap mesenchyme
CLCNKB	Loop of henle, Collecting duct (intercalated cells)
CLDN4	Collecting duct
CLDN6	Epithelial marker
CLDN7	Epithelial marker
CLDN8	Distal tubule , Loop of Henle , Collecting duct
COL1A1	Un-induced mesenchyme
COL1A2	Un-induced mesenchyme
COL3A1	Un-induced mesenchyme
COL5A2	Un-induced mesenchyme
CRYM	Cap mesenchyme
CTLA4	T cells (immune checkpoint)
CXCL2	Monocytes (later become Macrophages)
CXCR6	T cells
DES	Muscle
DYSF	Endothelial cells
EDNRB	Endothelial cells
EPCAM	Epithelial marker
ESRP1	Epithelial marker
EYA1	Cap mesenchyme
FN1	Un-induced mesenchyme
FOXD1	Un-induced mesenchyme
FOXI1	Distal tubule, Collecting duct (Intercalated Cells)
GAPDH	Housekeeping gene
GATA3	Distal tubule, Collecting duct
GZMA	NK cells
HNF4A	Proximal tubule
IL10	Macrophages
IL1B	Macrophages
KCNJ1	Loop of Henle
KDR	Endothelial cells
KRT18	Epithelial marker, Collecting duct
KRT19	Epithelial marker
LAG3	T cells (immune checkpoint)
LRP2	Proximal tubule
LTF	Neutrophils
MAFB	Podocytes
MEIS1	Un-induced mesenchyme
MKI67	Cell cycle (G2 phase)
MRC1	Macrophages
MUC1	Distal tubule, Collecting duct
MYH3	Un-induced mesenchyme, Muscle
MYL1	Muscle
MYO1B	Muscle
MYO1D	Muscle
MYO5A	Muscle
MYO9A	Muscle
MYOG	Muscle
NCAM1	Cap mesenchyme
NPHS1	Podocytes
NPHS2	Podocytes
OCLN	Epithelial marker
PAX2	Renal epithelial marker
PAX8	Renal epithelial marker
PDGFRB	Mesangial cells
PODXL	Podocytes
PROM1	Renal epithelial marker
PTPRO	Podocytes
REN	Juxtaglomerular cells
RHBG	Collecting duct
S100A8	Neutrophils
S100A9	Neutrophils
SALL2	Cap mesenchyme
SERPINE1	Un-induced mesenchyme (human)
SERPINE2	Un-induced mesenchyme (mouse)
SIX2	Cap mesenchyme
SLC12A1	Loop of henle, Distal tubule
SLC22A6	Proximal tubule
SLC34A1	Proximal tubule
SLC5A1	Proximal tubule
SYNPO	Podocytes
TOP2A	Cell cycle (G2 phase)
UMOD	Loop of henle, Distal tubule
VIM	Un-induced mesenchyme
WT1	Un-induced mesenchyme, Cap mesenchyme, Podocytes
