# Supplementary material for: Characterization of Continuous Transcriptional Heterogeneity in High-Risk Blastemal-Type Wilms’ Tumors Using Unsupervised Machine Learning
Source: Int J Mol Sci. 2023 Feb 9;24(4):3532. doi: 10.3390/ijms24043532 (PMC9965420; doi:10.3390/ijms24043532)
Supplement: Supplementary file 1 [file ijms-24-03532-s001.zip › Table S4 - GO enrichment stromalArc.xlsx]

## Sheet: Genes list
ABCA1
ABCG1
ACKR3
ACP5
ACTA2
ACTG2
ACTN1
ADA
ADA2
ADAM12
ADAMDEC1
ADAP2
ADCY7
ADGRE2
ADORA2B
ADORA3
AHR
AIF1
AIM2
ALDH1A3
ALOX5
ALOX5AP
ANGPTL2
ANXA1
AOAH
APOC1
APOE
AQP9
AREG
ARHGAP25
ARHGDIB
ARL4C
ARPC1B
ASPN
ATP8B4
BAG2
BASP1
BCL2A1
BIN2
BMP2K
BTK
C1QA
C1QB
C1R
C1S
C3
C3AR1
C5AR1
CAPG
CASP1
CCDC102B
CCL11
CCL18
CCL2
CCL20
CCL4
CCL5
CCL7
CCL8
CCN1
CCN4
CCR1
CCR2
CCR5
CCRL2
CD14
CD163
CD28
CD300A
CD33
CD36
CD38
CD44
CD48
CD52
CD53
CD69
CD72
CD84
CD86
CEBPB
CES1
CFD
CFH
CHI3L1
CHIT1
CLC
CLEC10A
CLEC2B
CLEC4A
CLEC5A
CLEC7A
CLIC2
CNN1
COL10A1
COL14A1
COL15A1
COL16A1
COL1A1
COL1A2
COL3A1
COL5A1
COL5A2
COL6A3
COL8A1
COL8A2
COLEC12
COMP
CORO1A
CORO1C
CPA3
CR1
CRISPLD2
CRTAM
CSF2RA
CSF2RB
CSTA
CSTB
CTSD
CTSL
CTSS
CTSZ
CXCL2
CXCL3
CXCL8
CXCL9
CXCR2
CYB5R4
CYBB
CYBRD1
CYTIP
DCLK1
DCN
DHRS9
DMXL2
DOCK10
DOCK2
DPEP2
DPYSL3
DUSP10
EDNRA
EEA1
EGR2
EGR3
ELL2
EMILIN1
EMP1
EMP3
EPYC
ERAP2
EREG
EVI2A
EVI2B
FABP4
FABP5
FAM49A
FAP
FAR2
FAS
FBLN1
FBN1
FCER1G
FCGR1B
FCGR2A
FCGR2B
FCGR2C
FCGR3B
FCN1
FGF7
FGR
FILIP1L
FKBP11
FLI1
FN1
FOLR2
FPR1
FPR3
FUCA1
FXYD5
FYB1
GAS7
GASK1B
GATA6
GBP2
GEM
GFPT2
GLIPR1
GLT8D2
GM2A
GMFG
GNA15
GPNMB
GPR171
GPR183
GPR65
GREM1
GRN
GZMB
GZMK
HCK
HCLS1
HLA-DMA
HLA-DPA1
HLA-DPB1
HLA-DQB1
HLA-DRA
HLA-DRB4
HLA-DRB6
HMOX1
HPSE
HRH1
HS3ST2
HSD11B1
HSPA6
ICAM1
IGF1
IGKC
IGLC1
IGSF6
IL10
IL10RA
IL1RN
IL33
IL6
IL7R
INHBA
IRAK3
IRF8
ISLR
ITGA4
ITGAM
ITGAX
ITGB2
ITK
JCHAIN
KCNE4
KCNMA1
KDELR3
KIAA0930
KLRB1
LAIR1
LAMP3
LAPTM5
LAT2
LCP1
LCP2
LEP
LGALS1
LGALS3
LGMN
LHFPL2
LILRB1
LILRB2
LILRB4
LILRB5
LINC00312
LINC00597
LIPA
LMCD1
LOX
LPXN
LRRC15
LST1
LUM
LY86
LY96
LYN
LYZ
M6PR
MAFF
MAN2B1
MAP3K8
MARCHF1
MARCO
MCOLN1
MCTP1
MCUB
ME1
MERTK
MFAP4
MFAP5
MFSD1
MGAT4A
MGP
MICB
MILR1
MMP1
MMP12
MMP2
MMP9
MMRN1
MNDA
MPP1
MRC1
MS4A4A
MS4A6A
MSR1
MX2
MXRA5
MYO1F
MYO5A
NABP1
NAGK
NAIP
NAV3
NCF2
NCF4
NCKAP1L
NIBAN1
NINJ2
NLRP3
NNMT
NOD2
NPC1
NPL
NRP2
NUPR1
OAS2
OGN
OLFML1
OLFML2B
OLR1
OSMR
P2RY14
PAPSS2
PCOLCE
PDGFRA
PDLIM3
PHACTR1
PIEZO2
PIK3CG
PILRA
PLA2G7
PLAC8
PLAUR
PLBD1
PLD3
PLEK
PLIN2
PLN
PLTP
PLXDC1
PLXNC1
POSTN
PPARG
PPBP
PRRX1
PTAFR
PTGDR
PTGIS
PTGS2
PTPN22
PTPRC
PTPRE
PYCARD
PYGL
RAB31
RAC2
RAP2B
RARRES1
RASSF2
RGCC
RGS1
RGS2
RIPK2
RNASE1
RNASE2
RNASE6
RNASET2
RND3
RNF130
RSAD2
RUBCNL
S100A11
S100A12
S100A8
S100A9
SAMHD1
SAMSN1
SCG2
SDC3
SDS
SEC24D
SELL
SERPINE1
SERPINF1
SFRP4
SH2B3
SH3BGRL3
SLA
SLAMF7
SLAMF8
SLC15A3
SLC16A6
SLC1A3
SLC29A3
SLC2A3
SLC31A2
SLC38A6
SLC46A3
SLCO2B1
SMPDL3A
SOAT1
SPON1
SRGN
SRPX
SRPX2
ST8SIA4
STEAP1
STK17B
STK4
SULF1
TAGLN
TBXAS1
TCIRG1
TDO2
TENT5A
TFEC
TGFBI
THBD
THBS1
THBS2
THEMIS2
TIGAR
TIMP1
TIMP2
TLR1
TLR2
TLR4
TLR7
TM6SF1
TMEM144
TMEM158
TMEM255A
TNFAIP3
TNFAIP6
TNFRSF1B
TRAF3IP3
TRAT1
TRBC1
TREM1
TREM2
TWIST1
TYROBP
UCP2
UPP1
VAV1
VCAN
VSIG4
VWF
XAF1
ZEB2
ZFPM2
ZNF331

## Sheet: Toppgene results
Category	ID	Name	Selected	Source	p-value	q-value Bonferroni	q-value FDR B&H	q-value FDR B&Y	Hit Count in Query List	Hit Count in Genome	Hit in Query List
GO: Molecular Function	GO:0005201	extracellular matrix structural constituent			6.552e-26	7.076e-23	7.076e-23	5.351e-22	38	178	CHI3L1,MFAP4,FBLN1,FBN1,MGP,SPON1,COL14A1,SRPX,COL1A1,COL1A2,COL3A1,COL5A1,COL5A2,COL6A3,COL8A1,COL8A2,COL10A1,MXRA5,COL15A1,VWF,COL16A1,COMP,FN1,MMRN1,POSTN,CCN1,VCAN,ASPN,DCN,SRPX2,OGN,EMILIN1,TGFBI,MFAP5,THBS1,THBS2,LUM,PCOLCE
GO: Molecular Function	GO:0005102	signaling receptor binding			9.635e-23	1.041e-19	5.203e-20	3.935e-19	112	1815	ABCA1,EREG,CEBPB,PDGFRA,HLA-DPA1,HLA-DQB1,LILRB2,HLA-DRA,CLEC7A,ACTN1,LY96,FABP4,CCR2,S100A8,S100A9,TYROBP,S100A12,FAP,FBLN1,FBN1,FCN1,PIK3CG,MICB,CXCL9,AHR,CCL2,FGF7,CCL4,CCL5,PLAUR,CCL7,CCL8,CCL11,GPNMB,CCL18,CCL20,FGR,MMP9,COL3A1,COL5A1,VWF,COL16A1,COMP,FN1,PILRA,ANXA1,FPR1,ICAM1,GMFG,APOE,PPARG,PPBP,AREG,IGF1,CCN1,PYCARD,JCHAIN,IGKC,IGLC1,FYB1,IL1RN,MARCO,IL6,CXCL8,LRRC15,IL10,INHBA,RIPK2,ITG…
GO: Molecular Function	GO:0005539	glycosaminoglycan binding			1.194e-20	1.289e-17	4.297e-18	3.249e-17	38	246	CFH,ADGRE2,FBN1,CCL2,FGF7,CCL5,CCL7,CCL8,GPNMB,SELL,COL5A1,COMP,FN1,APOE,POSTN,CCN1,VCAN,JCHAIN,DCN,ITGAM,ADA2,NRP2,NOD2,CCN4,PTPRC,SULF1,CRISPLD2,DPYSL3,EPYC,NLRP3,THBS1,THBS2,CD14,TLR2,CD44,TREM2,TNFAIP6,PCOLCE
GO: Molecular Function	GO:0038023	signaling receptor activity			2.054e-15	2.218e-12	5.546e-13	4.194e-12	92	1668	ABCA1,EREG,IGSF6,PDGFRA,HLA-DPA1,HLA-DQB1,LILRB2,CD300A,HLA-DRA,CLEC7A,EVI2A,TLR7,LY96,ADGRE2,CCR2,ADORA2B,COLEC12,ADORA3,FCER1G,FCGR1B,FCGR2B,FCN1,HRH1,CCL2,CCR1,CCL5,PLAUR,CCR5,GPR171,MERTK,MRC1,GPR65,FOLR2,FPR1,FPR3,ICAM1,PPARG,CR1,FAS,CSF2RA,CSF2RB,IL1RN,MARCO,IL7R,CXCR2,SLAMF8,IL10,IL10RA,ITGA4,PTAFR,PTGDR,ITGAX,ITGB2,LILRB1,NRP2,PTPRC,PTPRE,CLEC4A,ACKR3,P2RY14,C3AR1,C5AR1,KLRB1,LILRB5,LILRB…
GO: Molecular Function	GO:0060089	molecular transducer activity			9.009e-14	9.73e-11	1.946e-11	1.472e-10	94	1836	ABCA1,EREG,IGSF6,PDGFRA,HLA-DPA1,HLA-DQB1,LILRB2,CD300A,HLA-DRA,CLEC7A,EVI2A,TLR7,LY96,ADGRE2,CCR2,ADORA2B,COLEC12,ADORA3,FCER1G,FCGR1B,FCGR2B,FCN1,HRH1,CCL2,CCR1,CCL5,PLAUR,CCR5,GPR171,MERTK,MRC1,GPR65,FOLR2,FPR1,FPR3,ICAM1,RGCC,PPARG,CR1,FAS,CSF2RA,CSF2RB,IL1RN,MARCO,IL7R,CXCR2,SLAMF8,IL10,IL10RA,ITGA4,PTAFR,PTGDR,ITGAX,ITGB2,LILRB1,NRP2,PTPRC,PTPRE,CLEC4A,ACKR3,P2RY14,C3AR1,C5AR1,KLRB1,LILRB5,…
GO: Molecular Function	GO:0038187	pattern recognition receptor activity			2.556e-13	2.761e-10	4.601e-11	3.479e-10	11	21	CLEC7A,TLR7,LY96,COLEC12,FCN1,MARCO,PTAFR,CD14,CD36,TLR2,TLR4
GO: Molecular Function	GO:0043394	proteoglycan binding			6.213e-13	6.71e-10	9.586e-11	7.249e-10	14	44	CFH,GPNMB,COL5A1,COMP,FN1,APOE,CTSL,CTSS,ITGAM,HPSE,ADA2,PTPRC,THBS1,GREM1
GO: Molecular Function	GO:0044877	protein-containing complex binding			1.18e-12	1.274e-09	1.593e-10	1.205e-09	75	1356	ABCA1,HLA-DMA,PDGFRA,LILRB2,HLA-DRA,CORO1C,ACTN1,COLEC12,FAP,FBLN1,FBN1,FCER1G,FCGR1B,FCGR2A,FCGR2B,FCGR3B,AHR,AIF1,COL14A1,GPNMB,FGR,MMP9,MMP12,COL3A1,COL5A1,VWF,COL16A1,COMP,FN1,ICAM1,GMFG,GAS7,APOE,FAS,MSR1,IGF1,CCN1,SRGN,JCHAIN,FYB1,CTSL,CTSS,LRRC15,MYO5A,ASPN,DCN,ITGB2,LILRB1,NOD2,CCN4,KCNMA1,GNA15,TAGLN,DOCK2,CAPG,LCP1,EMILIN1,OLR1,ARPC1B,LGALS3,TGFBI,CORO1A,FCGR2C,THBS1,TIMP2,CD36,TLR2,CD4…
GO: Molecular Function	GO:0005178	integrin binding	1		3.013e-12	3.255e-09	3.275e-10	2.477e-09	22	146	ACTN1,FAP,FBLN1,FBN1,GPNMB,COL3A1,COL5A1,VWF,COL16A1,COMP,FN1,ICAM1,IGF1,CCN1,ITGB2,CCN4,LCP1,EMILIN1,TGFBI,THBS1,TIMP2,LYN
GO: Molecular Function	GO:0005518	collagen binding	1		3.032e-12	3.275e-09	3.275e-10	2.477e-09	17	80	COL14A1,MMP9,MMP12,VWF,COMP,FN1,SRGN,CTSL,CTSS,LRRC15,ASPN,DCN,TGFBI,THBS1,CD44,LUM,PCOLCE
GO: Molecular Function	GO:0008201	heparin binding			4.606e-12	4.975e-09	4.522e-10	3.42e-09	24	180	CFH,FBN1,CCL2,FGF7,CCL5,CCL7,CCL8,GPNMB,SELL,COL5A1,COMP,FN1,APOE,POSTN,CCN1,ITGAM,ADA2,NRP2,CCN4,PTPRC,CRISPLD2,THBS1,THBS2,PCOLCE
GO: Molecular Function	GO:0042379	chemokine receptor binding			6.383e-11	6.894e-08	5.745e-09	4.345e-08	15	71	CCR2,CXCL9,CCL2,CCL4,CCL5,CCL7,CCL8,CCL11,CCL18,CCL20,PPBP,CXCL8,CCRL2,CXCL2,CXCL3
GO: Molecular Function	GO:0008009	chemokine activity			7.385e-11	7.976e-08	6.032e-09	4.561e-08	13	50	CXCL9,CCL2,CCL4,CCL5,CCL7,CCL8,CCL11,CCL18,CCL20,PPBP,CXCL8,CXCL2,CXCL3
GO: Molecular Function	GO:1901681	sulfur compound binding			7.819e-11	8.444e-08	6.032e-09	4.561e-08	28	279	CFH,ADGRE2,FBN1,CCL2,FGF7,CCL5,CCL7,CCL8,GPNMB,SELL,COL5A1,COMP,FN1,APOE,POSTN,CCN1,SOAT1,ITGAM,ADA2,NRP2,CCN4,PTPRC,CRISPLD2,DPYSL3,THBS1,THBS2,GREM1,PCOLCE
GO: Molecular Function	GO:0004620	phospholipase activity			8.505e-11	9.185e-08	6.123e-09	4.631e-08	28	280	PLBD1,PDGFRA,HMOX1,PLD3,CLC,HRH1,CCR1,CCL5,CCR5,CCL8,PLEK,GPR65,ANXA1,FPR1,FPR3,APOC1,CCN1,CXCR2,PTAFR,ITK,SMPDL3A,GM2A,C3AR1,GNA15,C5AR1,PLA2G7,RGS2,EDNRA
GO: Molecular Function	GO:0030020	extracellular matrix structural constituent conferring tensile strength			1.188e-10	1.283e-07	8.016e-09	6.062e-08	12	42	COL14A1,COL1A1,COL1A2,COL3A1,COL5A1,COL5A2,COL6A3,COL8A1,COL8A2,COL10A1,COL15A1,COL16A1
GO: Molecular Function	GO:0016298	lipase activity			1.747e-10	1.886e-07	1.11e-08	8.392e-08	30	329	PLBD1,PDGFRA,CES1,HMOX1,PLD3,CLC,HRH1,CCR1,CCL5,CCR5,CCL8,PLEK,GPR65,ANXA1,FPR1,FPR3,APOC1,CCN1,CXCR2,PTAFR,ITK,SMPDL3A,GM2A,C3AR1,GNA15,C5AR1,PLA2G7,RGS2,EDNRA,LIPA
GO: Molecular Function	GO:0042277	peptide binding			2.372e-10	2.562e-07	1.423e-08	1.076e-07	35	441	HLA-DPA1,HLA-DPB1,HLA-DQB1,LILRB2,HLA-DRA,CCR2,FCGR2B,CCR1,CCR5,TMEM158,FPR1,FPR3,APOE,PPARG,MSR1,CTSD,MARCO,CXCR2,INHBA,ITGAM,ITGB2,LILRB1,NOD2,ERAP2,ACKR3,C1QA,KDELR3,CCRL2,EDNRA,CD14,CD36,TLR1,TLR2,TLR4,TREM2
GO: Molecular Function	GO:0033218	amide binding			3.209e-10	3.465e-07	1.824e-08	1.379e-07	38	515	HLA-DPA1,HLA-DPB1,HLA-DQB1,LILRB2,HLA-DRA,CCR2,FCGR2B,CCR1,CCR5,PLTP,FOLR2,TMEM158,FPR1,FPR3,APOE,PPARG,MSR1,CTSD,MARCO,SOAT1,CXCR2,INHBA,ITGAM,ITGB2,LILRB1,NOD2,ERAP2,ACKR3,C1QA,KDELR3,CCRL2,EDNRA,CD14,CD36,TLR1,TLR2,TLR4,TREM2
GO: Molecular Function	GO:0019955	cytokine binding			8.236e-10	8.895e-07	4.447e-08	3.363e-07	21	176	CCR2,CCR1,CCR5,COMP,FAS,CSF2RA,CSF2RB,IL1RN,IL7R,CXCR2,IL10RA,ITGA4,NRP2,ACKR3,CCRL2,THBS1,CD36,CD44,GREM1,OSMR,TNFRSF1B
GO: Molecular Function	GO:0004888	transmembrane signaling receptor activity			1.122e-09	1.211e-06	5.769e-08	4.362e-07	69	1387	ABCA1,EREG,IGSF6,PDGFRA,HLA-DPA1,HLA-DQB1,LILRB2,HLA-DRA,EVI2A,TLR7,ADGRE2,CCR2,ADORA2B,COLEC12,ADORA3,FCER1G,FCGR1B,FCGR2B,HRH1,CCL2,CCR1,CCR5,GPR171,MERTK,MRC1,GPR65,FPR1,FPR3,ICAM1,PPARG,CR1,FAS,CSF2RA,CSF2RB,MARCO,IL7R,CXCR2,IL10RA,PTAFR,PTGDR,ITGB2,LILRB1,NRP2,PTPRC,PTPRE,CLEC4A,ACKR3,P2RY14,C3AR1,C5AR1,KLRB1,LILRB5,NPC1,CCRL2,GPR183,EDNRA,FCGR2C,THBD,CD14,PLXNC1,TLR1,TLR4,CD44,TREM2,CD69,CD…
GO: Molecular Function	GO:0005125	cytokine activity			2.764e-09	2.986e-06	1.357e-07	1.026e-06	23	225	CXCL9,CCL2,CCL4,CCL5,CCL7,CCL8,CCL11,CCL18,CCL20,PPBP,AREG,IL1RN,IL6,CXCL8,IL10,INHBA,SCG2,IL33,GRN,CXCL2,CXCL3,TIMP1,GREM1
GO: Molecular Function	GO:0042802	identical protein binding			3.933e-09	4.248e-06	1.847e-07	1.397e-06	87	1997	NPL,CEBPB,PDGFRA,LILRB2,ACTN1,HMOX1,FABP5,TWIST1,CCR2,TYROBP,S100A11,FAP,FBLN1,FBN1,CLC,FCER1G,PIK3CG,AHR,CCL4,CCL5,EEA1,ALDH1A3,PLEK,MMP9,PLN,AIM2,ALOX5AP,COL1A1,COL1A2,VWF,FN1,ANXA1,OLFML2B,BAG2,SAMHD1,APOE,PPARG,FAS,ABCG1,PYCARD,JCHAIN,SDC3,SLAMF7,SLAMF8,MYO5A,INHBA,RIPK2,GBP2,BCL2A1,ITGA4,ADA2,LILRB1,PTGS2,NRP2,CD84,STK4,SRPX2,PTPRC,PTPRE,BTK,KCNMA1,C1QB,C1S,PYGL,SDS,CLEC2B,CASP1,TDO2,LCP1,EM…
GO: Molecular Function	GO:0004175	endopeptidase activity			1.528e-08	1.651e-05	6.878e-07	5.201e-06	48	859	SERPINF1,CLEC7A,S100A8,S100A9,FAP,CLC,PLAUR,MMP1,MMP2,MMP9,MMP12,AIM2,COL6A3,PPARG,CR1,FAS,IGF1,CCN1,PYCARD,LAMP3,CSTA,CSTB,CTSD,CTSL,CTSS,IL6,CTSZ,LGMN,NAIP,RIPK2,PTGS2,CFD,ADAMDEC1,C1R,C1S,C3,RARRES1,CASP1,ADAM12,NLRP3,THBS1,TIMP1,TIMP2,GZMB,GZMK,SERPINE1,CD44,LYN
GO: Molecular Function	GO:0030246	carbohydrate binding			2.119e-08	2.289e-05	9.156e-07	6.924e-06	25	292	MAN2B1,CLEC5A,HLA-DRA,CLEC7A,CHI3L1,COLEC12,CLC,FCN1,CLEC10A,SELL,MRC1,SLC2A3,VCAN,FUCA1,CLEC4A,PYGL,KLRB1,CLEC2B,OLR1,LGALS1,LGALS3,CD33,CD69,CD72,M6PR
GO: Molecular Function	GO:0019865	immunoglobulin binding			2.234e-08	2.413e-05	9.282e-07	7.019e-06	9	31	FCER1G,FCGR1B,FCGR2A,FCGR2B,FCGR3B,VWF,JCHAIN,LGALS3,FCGR2C
GO: Molecular Function	GO:0001851	complement component C3b binding			3.803e-08	4.107e-05	1.521e-06	1.15e-05	5	6	CFH,VSIG4,CR1,ITGAM,ITGB2
GO: Molecular Function	GO:0019864	IgG binding			6.184e-08	6.679e-05	2.342e-06	1.771e-05	6	11	FCER1G,FCGR1B,FCGR2A,FCGR2B,FCGR3B,FCGR2C
GO: Molecular Function	GO:0048018	receptor ligand activity			6.289e-08	6.792e-05	2.342e-06	1.771e-05	33	497	EREG,FBN1,CXCL9,CCL2,FGF7,CCL4,CCL5,CCL7,CCL8,CCL11,GPNMB,CCL18,CCL20,GMFG,PPBP,AREG,IGF1,IL1RN,IL6,CXCL8,IL10,INHBA,ADA2,SCG2,IL33,GRN,CXCL2,CXCL3,OGN,LEP,LGALS3,TIMP1,GREM1
GO: Molecular Function	GO:0002020	protease binding			7.162e-08	7.735e-05	2.489e-06	1.882e-05	26	333	SERPINF1,FAP,FBLN1,COL1A1,COL1A2,COL3A1,SELL,COL6A3,VWF,COMP,FN1,FAS,PYCARD,CSTA,CSTB,NAIP,RIPK2,C3,RARRES1,CASP1,TIMP1,TIMP2,CD28,SERPINE1,TNFAIP3,PCOLCE
GO: Molecular Function	GO:0001968	fibronectin binding			7.209e-08	7.786e-05	2.489e-06	1.882e-05	9	35	FBLN1,MMP2,MMP9,COMP,CTSL,CTSS,LRRC15,ITGA4,THBS1
GO: Molecular Function	GO:0001540	amyloid-beta binding			7.374e-08	7.964e-05	2.489e-06	1.882e-05	13	85	LILRB2,FCGR2B,APOE,MSR1,MARCO,ITGAM,ITGB2,LILRB1,C1QA,CD36,TLR2,TLR4,TREM2
GO: Molecular Function	GO:0030546	signaling receptor activator activity			7.955e-08	8.592e-05	2.604e-06	1.969e-05	33	502	EREG,FBN1,CXCL9,CCL2,FGF7,CCL4,CCL5,CCL7,CCL8,CCL11,GPNMB,CCL18,CCL20,GMFG,PPBP,AREG,IGF1,IL1RN,IL6,CXCL8,IL10,INHBA,ADA2,SCG2,IL33,GRN,CXCL2,CXCL3,OGN,LEP,LGALS3,TIMP1,GREM1
GO: Molecular Function	GO:0048020	CCR chemokine receptor binding			9.501e-08	0.0001026	3.018e-06	2.282e-05	10	47	CCR2,CCL2,CCL4,CCL5,CCL7,CCL8,CCL11,CCL18,CCL20,CCRL2
GO: Molecular Function	GO:0008289	lipid binding			1.149e-07	0.0001241	3.544e-06	2.68e-05	44	804	ABCA1,CD300A,LY96,FABP4,FABP5,S100A8,S100A9,BIN2,HSD11B1,EEA1,PLEK,PLTP,ALOX5AP,SELL,COMP,ANXA1,RUBCNL,APOC1,APOE,PPARG,ABCG1,IGF1,JCHAIN,FYB1,SOAT1,ADAP2,NCF4,PTAFR,BTK,C3,NPC1,PLA2G7,GPR183,MCOLN1,THBS1,RNASE2,MCTP1,CD14,CD36,TLR1,TLR2,TLR4,TREM2,LYN
GO: Molecular Function	GO:0005198	structural molecule activity			1.274e-07	0.0001376	3.822e-06	2.89e-05	43	779	ACTN1,CHI3L1,MFAP4,FBLN1,FBN1,MGP,SPON1,COL14A1,SRPX,COL1A1,COL1A2,COL3A1,COL5A1,COL5A2,COL6A3,COL8A1,COL8A2,COL10A1,MXRA5,COL15A1,VWF,COL16A1,COMP,FN1,ANXA1,APOE,MMRN1,POSTN,CCN1,VCAN,ASPN,DCN,SRPX2,PDLIM3,OGN,EMILIN1,ARPC1B,TGFBI,MFAP5,THBS1,THBS2,LUM,PCOLCE
GO: Molecular Function	GO:0098772	molecular function regulator			1.928e-07	0.0002082	5.628e-06	4.256e-05	79	1905	EREG,SERPINF1,CHI3L1,FBLN1,FBN1,KCNE4,CXCL9,CCL2,FGF7,CCL4,CCL5,CCL7,CCL8,CCL11,GPNMB,CCL18,CCL20,PLN,ALOX5AP,VAV1,COL6A3,FN1,BMP2K,ANXA1,RGCC,BAG2,GMFG,DOCK10,APOC1,APOE,PPBP,AREG,ARHGDIB,IGF1,PYCARD,CSTA,CSTB,IL1RN,IL6,CXCL8,ADAP2,PHACTR1,IL10,INHBA,NAIP,FXYD5,NCF2,NCF4,ADA2,GEM,ZEB2,STK4,SCG2,GM2A,C3,ARHGAP25,MCUB,IL33,RAC2,DOCK2,RARRES1,CASP1,GRN,NUPR1,CXCL2,CXCL3,OGN,RGS1,RGS2,LEP,LGALS3,TIM…
GO: Molecular Function	GO:0001846	opsonin binding			2.012e-07	0.0002173	5.719e-06	4.325e-05	7	20	CFH,VSIG4,CR1,ITGAM,ITGB2,C5AR1,CD14
GO: Molecular Function	GO:0035325	Toll-like receptor binding			2.208e-07	0.0002385	6.115e-06	4.624e-05	6	13	LY96,S100A8,S100A9,CD36,TLR1,TLR2
GO: Molecular Function	GO:0097153	cysteine-type endopeptidase activity involved in apoptotic process			2.831e-07	0.0003057	7.643e-06	5.78e-05	21	245	CLEC7A,S100A8,S100A9,CLC,PLAUR,MMP9,PPARG,FAS,IGF1,CCN1,PYCARD,LAMP3,CTSD,IL6,NAIP,RIPK2,PTGS2,CASP1,NLRP3,THBS1,CD44
GO: Molecular Function	GO:0005126	cytokine receptor binding			3.014e-07	0.0003255	7.939e-06	6.004e-05	24	312	CCR2,CXCL9,CCL2,CCL4,CCL5,CCL7,CCL8,CCL11,CCL18,CCL20,PPBP,PYCARD,IL1RN,IL6,CXCL8,IL10,INHBA,SH2B3,CCRL2,CXCL2,CXCL3,CD44,GREM1,LYN
GO: Molecular Function	GO:0004197	cysteine-type endopeptidase activity			5.039e-07	0.0005442	1.296e-05	9.798e-05	26	368	CLEC7A,S100A8,S100A9,CLC,PLAUR,MMP9,AIM2,PPARG,FAS,IGF1,CCN1,PYCARD,LAMP3,CTSD,CTSL,CTSS,IL6,CTSZ,LGMN,NAIP,RIPK2,PTGS2,CASP1,NLRP3,THBS1,CD44
GO: Molecular Function	GO:0030545	receptor regulator activity			5.679e-07	0.0006133	1.422e-05	0.0001075	33	547	EREG,FBN1,CXCL9,CCL2,FGF7,CCL4,CCL5,CCL7,CCL8,CCL11,GPNMB,CCL18,CCL20,GMFG,PPBP,AREG,IGF1,IL1RN,IL6,CXCL8,IL10,INHBA,ADA2,SCG2,IL33,GRN,CXCL2,CXCL3,OGN,LEP,LGALS3,TIMP1,GREM1
GO: Molecular Function	GO:0038024	cargo receptor activity			5.792e-07	0.0006255	1.422e-05	0.0001075	17	173	ABCA1,CLEC7A,CD163,COLEC12,FCN1,MRC1,FOLR2,MSR1,IGKC,IGLC1,MARCO,ITGAM,ITGB2,ACKR3,OLR1,CD36,TRBC1
GO: Molecular Function	GO:0004672	protein kinase activity			7.252e-07	0.0007833	1.741e-05	0.0001316	59	1315	EREG,PDGFRA,STK17B,CD300A,CORO1C,CHI3L1,ADCY7,FABP4,ADORA2B,S100A12,PIK3CG,CCL2,CCL5,CCL8,GPNMB,FGR,MERTK,BMP2K,MAP3K8,FPR1,RGCC,GMFG,APOE,SLA,IGF1,CCN1,PYCARD,IL1RN,IL6,RASSF2,RIPK2,PTPN22,ZEB2,ITK,NRP2,NOD2,STK4,PTPRC,BTK,C5AR1,RAC2,RAP2B,SH2B3,LCP2,RGS2,LEP,EDNRA,THBS1,TLR1,TLR4,TREM2,IRAK3,DUSP10,TNFAIP3,GREM1,LYN,HCK,DCLK1,NCKAP1L
GO: Molecular Function	GO:0008233	peptidase activity			9.883e-07	0.001067	2.32e-05	0.0001755	58	1296	SERPINF1,CLEC7A,S100A8,S100A9,FAP,FBLN1,CLC,PLAUR,MMP1,MMP2,MMP9,MMP12,AIM2,COL6A3,FN1,CPA3,PPARG,CR1,FAS,IGF1,CCN1,PYCARD,LAMP3,CSTA,CSTB,CTSD,CTSL,CTSS,IL6,CTSZ,LGMN,NAIP,RIPK2,PTGS2,CFD,ADAMDEC1,ERAP2,DPEP2,C1R,C1S,C3,IL33,RARRES1,CASP1,GRN,ADAM12,NUPR1,NLRP3,THBS1,TIMP1,TIMP2,GZMB,GZMK,SERPINE1,CD44,TNFAIP3,LYN,PCOLCE
GO: Molecular Function	GO:0004629	phospholipase C activity			1.069e-06	0.001155	2.445e-05	0.0001849	16	161	PDGFRA,HRH1,CCR1,CCL5,CCR5,PLEK,GPR65,FPR1,FPR3,CXCR2,PTAFR,ITK,C3AR1,GNA15,C5AR1,EDNRA
GO: Molecular Function	GO:0016788	hydrolase activity, acting on ester bonds			1.087e-06	0.001174	2.445e-05	0.0001849	56	1237	PLBD1,PDGFRA,CES1,CD300A,ACP5,HMOX1,PLD3,CLC,AHR,HRH1,CCR1,CCL5,CCR5,CCL8,PLEK,GPR65,BMP2K,ANXA1,FPR1,FPR3,AOAH,SAMHD1,APOC1,CCN1,VCAN,RNASET2,IL6,CXCL8,CXCR2,PHACTR1,PTPN22,PTAFR,ZEB2,ITK,NOD2,PTPRC,PTPRE,SMPDL3A,SULF1,GM2A,C3AR1,GNA15,C5AR1,PLA2G7,TIGAR,OAS2,RGS2,EDNRA,LGALS3,RNASE1,LIPA,RNASE2,RNASE6,CD33,DUSP10,NCKAP1L
GO: Molecular Function	GO:0001875	lipopolysaccharide immune receptor activity			1.384e-06	0.001495	3.051e-05	0.0002307	4	5	LY96,PTAFR,TLR2,TLR4
GO: Molecular Function	GO:0001848	complement binding			1.514e-06	0.001635	3.271e-05	0.0002474	7	26	CFH,VSIG4,CR1,ITGAM,ITGB2,C3AR1,C5AR1
GO: Molecular Function	GO:0016773	phosphotransferase activity, alcohol group as acceptor			1.602e-06	0.00173	3.393e-05	0.0002566	62	1444	EREG,PDGFRA,STK17B,CD300A,CORO1C,CHI3L1,ADCY7,FABP4,ADORA2B,S100A12,PIK3CG,CCL2,CCL5,CCL8,GPNMB,FGR,MERTK,NAGK,BMP2K,MAP3K8,FPR1,RGCC,GMFG,APOE,SLA,IGF1,CCN1,PYCARD,IL1RN,IL6,RASSF2,RIPK2,PTPN22,ZEB2,ITK,NRP2,NOD2,STK4,PTPRC,BTK,C5AR1,RAC2,TIGAR,RAP2B,SH2B3,LCP2,PAPSS2,RGS2,LEP,EDNRA,THBS1,TLR1,TLR4,TREM2,IRAK3,DUSP10,TNFAIP3,GREM1,LYN,HCK,DCLK1,NCKAP1L
GO: Molecular Function	GO:0036041	long-chain fatty acid binding			2.165e-06	0.002338	4.342e-05	0.0003284	6	18	FABP4,S100A8,S100A9,ALOX5AP,PPARG,CD36
GO: Molecular Function	GO:0042834	peptidoglycan binding			2.165e-06	0.002338	4.342e-05	0.0003284	6	18	JCHAIN,NOD2,NLRP3,CD14,TLR2,TREM2
GO: Molecular Function	GO:0004896	cytokine receptor activity			2.171e-06	0.002345	4.342e-05	0.0003284	12	96	CCR2,CCR1,CCR5,CSF2RA,CSF2RB,IL7R,CXCR2,IL10RA,ACKR3,CCRL2,CD44,OSMR
GO: Molecular Function	GO:0008081	phosphoric diester hydrolase activity			3.852e-06	0.00416	7.564e-05	0.000572	19	242	PDGFRA,HMOX1,PLD3,HRH1,CCR1,CCL5,CCR5,PLEK,GPR65,FPR1,FPR3,CXCR2,PTAFR,ITK,SMPDL3A,C3AR1,GNA15,C5AR1,EDNRA
GO: Molecular Function	GO:0019838	growth factor binding			4.031e-06	0.004354	7.722e-05	0.000584	17	199	EREG,PDGFRA,COL1A1,COL1A2,COL3A1,COL5A1,CSF2RB,CCN1,IL1RN,IL7R,IL10RA,NRP2,CCN4,SRPX2,THBS1,CD36,OSMR
GO: Molecular Function	GO:0070891	lipoteichoic acid binding			4.076e-06	0.004402	7.722e-05	0.000584	4	6	CD14,CD36,TLR2,TREM2
GO: Molecular Function	GO:0016301	kinase activity			4.32e-06	0.004665	8.044e-05	0.0006083	66	1621	EREG,PDGFRA,STK17B,CD300A,CORO1C,CHI3L1,ADCY7,FABP4,ADORA2B,S100A12,PIK3CG,CCL2,CCL5,CCL8,GPNMB,FGR,MERTK,MPP1,NAGK,BMP2K,MAP3K8,FPR1,RGCC,GMFG,APOE,SLA,IGF1,CCN1,PYCARD,IL1RN,IL6,SLAMF8,RASSF2,RIPK2,PTPN22,ZEB2,ITK,NRP2,NOD2,STK4,PTPRC,BTK,C5AR1,RAC2,TIGAR,RAP2B,SH2B3,LCP2,PAPSS2,NUPR1,RGS2,LEP,EDNRA,THBS1,TLR1,TLR4,CD44,TREM2,IRAK3,DUSP10,TNFAIP3,GREM1,LYN,HCK,DCLK1,NCKAP1L
GO: Molecular Function	GO:0050839	cell adhesion molecule binding			5.554e-06	0.005998	0.0001017	0.0007688	30	525	LILRB2,ACTN1,S100A11,FAP,FBLN1,FBN1,GPNMB,COL3A1,SELL,COL5A1,VWF,COL16A1,COMP,FN1,ANXA1,ICAM1,POSTN,IGF1,CCN1,FXYD5,ITGA4,ITGB2,CCN4,CAPG,LCP1,EMILIN1,TGFBI,THBS1,TIMP2,LYN
GO: Molecular Function	GO:0048407	platelet-derived growth factor binding			7.131e-06	0.007702	0.0001284	0.0009707	5	13	PDGFRA,COL1A1,COL1A2,COL3A1,COL5A1
GO: Molecular Function	GO:0005504	fatty acid binding			7.8e-06	0.008424	0.0001381	0.001044	8	45	FABP4,FABP5,S100A8,S100A9,ALOX5AP,APOC1,PPARG,CD36
GO: Molecular Function	GO:0050544	arachidonic acid binding			9.336e-06	0.01008	0.0001626	0.00123	4	7	S100A8,S100A9,ALOX5AP,PPARG
GO: Molecular Function	GO:0016493	C-C chemokine receptor activity			1.067e-05	0.01152	0.0001801	0.001362	6	23	CCR2,CCR1,CCR5,CXCR2,ACKR3,CCRL2
GO: Molecular Function	GO:0043395	heparan sulfate proteoglycan binding			1.067e-05	0.01152	0.0001801	0.001362	6	23	CFH,COMP,APOE,ITGAM,PTPRC,GREM1
GO: Molecular Function	GO:0001664	G protein-coupled receptor binding			1.092e-05	0.0118	0.0001815	0.001373	21	308	CCR2,FCN1,CXCL9,CCL2,CCL4,CCL5,CCL7,CCL8,CCL11,CCL18,CCL20,FPR1,PPBP,MARCO,CXCL8,ADA2,C3,GNA15,CCRL2,CXCL2,CXCL3
GO: Molecular Function	GO:0071791	chemokine (C-C motif) ligand 5 binding			1.257e-05	0.01358	0.0002057	0.001556	3	3	CCR2,CCR1,CCR5
GO: Molecular Function	GO:0050840	extracellular matrix binding			1.363e-05	0.01472	0.0002196	0.001661	9	63	OLFML2B,CCN1,CTSS,LRRC15,DCN,LGALS1,LGALS3,TGFBI,THBS1
GO: Molecular Function	GO:0060090	molecular adaptor activity			1.492e-05	0.01611	0.0002369	0.001792	27	470	ABCA1,CLEC7A,CD163,COLEC12,FCN1,COL14A1,COL1A2,MRC1,COL8A2,ANXA1,FOLR2,SLA,MSR1,JCHAIN,IGKC,IGLC1,MARCO,ADAP2,ITGAM,ITGB2,TRAT1,ACKR3,SH2B3,OLR1,CD28,CD36,TRBC1
GO: Molecular Function	GO:0042578	phosphoric ester hydrolase activity			1.708e-05	0.01844	0.0002673	0.002021	35	700	PDGFRA,CD300A,ACP5,HMOX1,PLD3,AHR,HRH1,CCR1,CCL5,CCR5,PLEK,GPR65,BMP2K,FPR1,FPR3,SAMHD1,VCAN,CXCR2,PHACTR1,PTPN22,PTAFR,ZEB2,ITK,PTPRC,PTPRE,SMPDL3A,C3AR1,GNA15,C5AR1,TIGAR,EDNRA,LGALS3,CD33,DUSP10,NCKAP1L
GO: Molecular Function	GO:0050543	icosatetraenoic acid binding			1.833e-05	0.0198	0.0002828	0.002139	4	8	S100A8,S100A9,ALOX5AP,PPARG
GO: Molecular Function	GO:0019956	chemokine binding			1.902e-05	0.02055	0.0002854	0.002158	7	37	CCR2,CCR1,CCR5,CXCR2,ITGA4,ACKR3,CCRL2
GO: Molecular Function	GO:0001530	lipopolysaccharide binding			1.902e-05	0.02055	0.0002854	0.002158	7	37	LY96,PTAFR,RNASE2,CD14,TLR2,TLR4,TREM2
GO: Molecular Function	GO:0071813	lipoprotein particle binding			2.041e-05	0.02204	0.0002979	0.002253	8	51	ABCA1,COLEC12,APOE,MSR1,OLR1,THBS1,CD36,TREM2
GO: Molecular Function	GO:0071814	protein-lipid complex binding			2.041e-05	0.02204	0.0002979	0.002253	8	51	ABCA1,COLEC12,APOE,MSR1,OLR1,THBS1,CD36,TREM2
GO: Molecular Function	GO:0019957	C-C chemokine binding			2.295e-05	0.02478	0.0003219	0.002434	6	26	CCR2,CCR1,CCR5,CXCR2,ACKR3,CCRL2
GO: Molecular Function	GO:0001637	G protein-coupled chemoattractant receptor activity			2.295e-05	0.02478	0.0003219	0.002434	6	26	CCR2,CCR1,CCR5,CXCR2,ACKR3,CCRL2
GO: Molecular Function	GO:0004950	chemokine receptor activity			2.295e-05	0.02478	0.0003219	0.002434	6	26	CCR2,CCR1,CCR5,CXCR2,ACKR3,CCRL2
GO: Molecular Function	GO:0042803	protein homodimerization activity			2.481e-05	0.02679	0.0003435	0.002598	45	1019	CEBPB,PDGFRA,LILRB2,ACTN1,HMOX1,TWIST1,CCR2,S100A11,FAP,FCER1G,AHR,CCL5,EEA1,ALDH1A3,PLEK,PLN,ALOX5AP,VWF,ANXA1,OLFML2B,APOE,ABCG1,PYCARD,JCHAIN,RIPK2,GBP2,BCL2A1,ITGA4,ADA2,LILRB1,PTGS2,STK4,PTPRC,PTPRE,KCNMA1,C1QB,PYGL,SDS,LGALS1,LGALS3,CORO1A,CD28,CD69,IRAK3,GREM1
GO: Molecular Function	GO:0031406	carboxylic acid binding			2.926e-05	0.0316	0.0003986	0.003014	21	329	FABP4,FABP5,CCR2,S100A8,S100A9,FCN1,CCL2,ALOX5AP,FOLR2,APOC1,PPARG,SLC1A3,VCAN,PTGDR,PYGL,ST8SIA4,TDO2,CD33,CD36,CD44,TNFAIP6
GO: Molecular Function	GO:0016772	transferase activity, transferring phosphorus-containing groups			2.952e-05	0.03189	0.0003986	0.003014	70	1859	EREG,PDGFRA,STK17B,CD300A,CORO1C,CHI3L1,ADCY7,FABP4,ADORA2B,S100A12,PIK3CG,CCL2,CCL5,CCL8,GPNMB,FGR,MERTK,MPP1,NAGK,BMP2K,MAP3K8,TENT5A,FPR1,RGCC,GMFG,APOE,PPARG,SLA,IGF1,CCN1,PYCARD,IL1RN,IL6,CXCL8,SLAMF8,RASSF2,RIPK2,PTPN22,ZEB2,ITK,NRP2,NOD2,STK4,PTPRC,BTK,C5AR1,RAC2,TIGAR,RAP2B,SH2B3,OAS2,LCP2,PAPSS2,NUPR1,RGS2,LEP,EDNRA,THBS1,TLR1,TLR4,CD44,TREM2,IRAK3,DUSP10,TNFAIP3,GREM1,LYN,HCK,DCLK1,NCKA…
GO: Molecular Function	GO:0046983	protein dimerization activity			3.314e-05	0.03579	0.0004418	0.003341	61	1557	CEBPB,PDGFRA,LILRB2,ACTN1,HMOX1,TWIST1,CCR2,S100A11,FAP,FCER1G,AHR,CCL5,CCL11,EEA1,ALDH1A3,PLEK,PLN,ALOX5AP,TFEC,VWF,ANXA1,OLFML2B,APOE,PPARG,ABCG1,PYCARD,JCHAIN,CYBB,IL10,MYO5A,INHBA,RIPK2,GBP2,NCF4,BCL2A1,ITGA4,ITGAM,HPSE,ITGAX,ADA2,ITGB2,LILRB1,PTGS2,STK4,PTPRC,PTPRE,KCNMA1,C1QB,PYGL,SDS,LGALS1,LGALS3,CORO1A,CD28,CD36,TLR1,TLR2,TLR4,CD69,IRAK3,GREM1
GO: Molecular Function	GO:0030234	enzyme regulator activity			3.384e-05	0.03655	0.0004457	0.003371	47	1096	SERPINF1,CHI3L1,FBLN1,CCL5,CCL8,PLN,ALOX5AP,COL6A3,FN1,BMP2K,ANXA1,RGCC,BAG2,GMFG,APOC1,APOE,ARHGDIB,IGF1,PYCARD,CSTA,CSTB,ADAP2,PHACTR1,NAIP,NCF2,NCF4,ZEB2,STK4,GM2A,C3,ARHGAP25,RAC2,DOCK2,RARRES1,CASP1,NUPR1,RGS1,RGS2,LGALS3,TIMP1,TIMP2,TLR1,TLR4,SERPINE1,GREM1,PCOLCE,NCKAP1L
GO: Molecular Function	GO:0008083	growth factor activity			3.503e-05	0.03783	0.0004558	0.003447	14	167	EREG,FGF7,GMFG,PPBP,AREG,IGF1,IL6,IL10,INHBA,ADA2,GRN,OGN,LEP,TIMP1
GO: Molecular Function	GO:0043177	organic acid binding			5.142e-05	0.05553	0.0006611	0.004999	21	342	FABP4,FABP5,CCR2,S100A8,S100A9,FCN1,CCL2,ALOX5AP,FOLR2,APOC1,PPARG,SLC1A3,VCAN,PTGDR,PYGL,ST8SIA4,TDO2,CD33,CD36,CD44,TNFAIP6
GO: Molecular Function	GO:0042287	MHC protein binding			6.84e-05	0.07387	0.000869	0.006572	8	60	HLA-DPA1,HLA-DQB1,LILRB2,HLA-DRA,CLEC7A,PILRA,LILRB1,MARCHF1
GO: Molecular Function	GO:0030169	low-density lipoprotein particle binding			8.031e-05	0.08674	0.001009	0.007627	6	32	COLEC12,MSR1,OLR1,THBS1,CD36,TREM2
GO: Molecular Function	GO:0004707	MAP kinase activity			8.188e-05	0.08843	0.001016	0.007687	22	380	CD300A,ADORA2B,S100A12,PIK3CG,MAP3K8,FPR1,APOE,IGF1,IL1RN,RIPK2,PTPN22,ZEB2,NOD2,PTPRC,C5AR1,SH2B3,RGS2,THBS1,TLR4,IRAK3,DUSP10,LYN
GO: Molecular Function	GO:0004875	complement receptor activity			0.0001186	0.1281	0.001423	0.01076	3	5	CR1,C3AR1,C5AR1
GO: Molecular Function	GO:0001847	opsonin receptor activity			0.0001186	0.1281	0.001423	0.01076	3	5	CR1,C5AR1,CD14
GO: Molecular Function	GO:0035662	Toll-like receptor 4 binding			0.0001186	0.1281	0.001423	0.01076	3	5	LY96,S100A8,S100A9
GO: Molecular Function	GO:0050786	RAGE receptor binding			0.0001204	0.13	0.001429	0.01081	4	12	S100A8,S100A9,S100A12,FPR1
GO: Molecular Function	GO:0004713	protein tyrosine kinase activity			0.0001352	0.146	0.001587	0.012	16	237	EREG,PDGFRA,CCL5,FGR,MERTK,SLA,RIPK2,ITK,NRP2,PTPRC,BTK,RAP2B,EDNRA,GREM1,LYN,HCK
GO: Molecular Function	GO:0033293	monocarboxylic acid binding			0.0001382	0.1493	0.001605	0.01214	9	84	FABP4,FABP5,S100A8,S100A9,ALOX5AP,APOC1,PPARG,PYGL,CD36
GO: Molecular Function	GO:0030021	extracellular matrix structural constituent conferring compression resistance			0.000154	0.1663	0.00177	0.01338	5	23	VCAN,ASPN,DCN,OGN,LUM
GO: Molecular Function	GO:0048029	monosaccharide binding			0.0001658	0.179	0.001885	0.01425	9	86	MAN2B1,COLEC12,MRC1,SLC2A3,CLEC4A,PYGL,LGALS1,LGALS3,M6PR
GO: Molecular Function	GO:0004715	non-membrane spanning protein tyrosine kinase activity			0.0001834	0.1981	0.002064	0.01561	7	52	FGR,SLA,RIPK2,ITK,BTK,LYN,HCK
GO: Molecular Function	GO:0008047	enzyme activator activity			0.0001887	0.2038	0.002101	0.01589	27	546	FBLN1,CCL5,CCL8,ALOX5AP,FN1,RGCC,GMFG,APOC1,APOE,ARHGDIB,IGF1,PYCARD,ADAP2,NCF2,NCF4,STK4,GM2A,ARHGAP25,DOCK2,CASP1,NUPR1,RGS1,RGS2,TIMP2,GREM1,PCOLCE,NCKAP1L
GO: Molecular Function	GO:0050542	icosanoid binding			0.0001909	0.2061	0.002103	0.01591	5	24	S100A8,S100A9,ALOX5AP,PPARG,PTGDR
GO: Molecular Function	GO:0005496	steroid binding			0.0002027	0.2189	0.002211	0.01672	10	108	ABCA1,HSD11B1,COMP,APOE,PPARG,ABCG1,IGF1,SOAT1,NPC1,GPR183
GO: Molecular Function	GO:0031726	CCR1 chemokine receptor binding			0.0002331	0.2517	0.002492	0.01885	3	6	CCL4,CCL5,CCL7
GO: Molecular Function	GO:0031727	CCR2 chemokine receptor binding			0.0002331	0.2517	0.002492	0.01885	3	6	CCR2,CCL2,CCL7
GO: Molecular Function	GO:0061134	peptidase regulator activity			0.000249	0.2689	0.002636	0.01994	15	225	SERPINF1,FBLN1,COL6A3,FN1,PYCARD,CSTA,CSTB,NAIP,C3,RARRES1,CASP1,TIMP1,TIMP2,SERPINE1,PCOLCE
GO: Molecular Function	GO:0004016	adenylate cyclase activity			0.0002843	0.307	0.002981	0.02254	16	253	ABCA1,ADGRE2,ADCY7,CCR2,ADORA2B,CXCL9,PLN,GPR65,FPR1,MARCO,PTGDR,GNA15,RGS1,RGS2,EDNRA,TIMP2
GO: Molecular Function	GO:0009975	cyclase activity			0.0003118	0.3367	0.003207	0.02425	17	281	ABCA1,ADGRE2,ADCY7,CCR2,ADORA2B,CXCL9,PLN,GPR65,FPR1,MARCO,PTGDR,GNA15,RGS1,RGS2,EDNRA,TIMP2,CD38
GO: Molecular Function	GO:0016849	phosphorus-oxygen lyase activity			0.0003118	0.3367	0.003207	0.02425	17	281	ABCA1,ADGRE2,ADCY7,CCR2,ADORA2B,CXCL9,PLN,GPR65,FPR1,MARCO,PTGDR,GNA15,RGS1,RGS2,EDNRA,TIMP2,CD38
GO: Molecular Function	GO:0050220	prostaglandin-E synthase activity			0.0004009	0.4329	0.004084	0.03089	3	7	ITGAM,ITGB2,NOD2
GO: Molecular Function	GO:0004051	arachidonate 5-lipoxygenase activity			0.0005462	0.5899	0.005412	0.04093	2	2	ALOX5,ALOX5AP
GO: Molecular Function	GO:0042497	triacyl lipopeptide binding			0.0005462	0.5899	0.005412	0.04093	2	2	TLR1,TLR2
GO: Molecular Function	GO:0035717	chemokine (C-C motif) ligand 7 binding			0.0005462	0.5899	0.005412	0.04093	2	2	CCR2,CCR1
GO: Molecular Function	GO:0008234	cysteine-type peptidase activity			0.0005778	0.624	0.005673	0.0429	31	711	CLEC7A,S100A8,S100A9,CLC,PLAUR,MMP9,AIM2,PPARG,FAS,IGF1,CCN1,PYCARD,LAMP3,CSTA,CSTB,CTSD,CTSL,CTSS,IL6,CTSZ,LGMN,NAIP,RIPK2,PTGS2,IL33,CASP1,NUPR1,NLRP3,THBS1,CD44,TNFAIP3
GO: Molecular Function	GO:0032934	sterol binding			0.0006101	0.6589	0.005936	0.04489	7	63	ABCA1,APOE,PPARG,ABCG1,SOAT1,NPC1,GPR183
GO: Molecular Function	GO:0003823	antigen binding			0.0006455	0.6972	0.006225	0.04707	12	171	HLA-DPA1,HLA-DPB1,HLA-DQB1,HLA-DRA,JCHAIN,IGKC,IGLC1,IL7R,ITGA4,LILRB4,CD48,TRBC1
GO: Molecular Function	GO:0015026	coreceptor activity			0.0007963	0.86	0.007611	0.05756	6	48	LY96,CCR5,ITGA4,ACKR3,CD28,CD86
GO: Molecular Function	GO:0070851	growth factor receptor binding			0.0008328	0.8994	0.00789	0.05967	11	152	EREG,PDGFRA,FGF7,AREG,PYCARD,IL1RN,IL6,IL10,CD44,GREM1,LYN
GO: Molecular Function	GO:0043236	laminin binding			0.0008983	0.9702	0.008436	0.0638	5	33	CTSS,LRRC15,LGALS1,LGALS3,THBS1
GO: Molecular Function	GO:0019763	immunoglobulin receptor activity			0.0009294	1	0.008653	0.06544	3	9	FCER1G,FCGR1B,FCGR2B
GO: Molecular Function	GO:1901567	fatty acid derivative binding			0.0009919	1	0.009156	0.06924	6	50	S100A8,S100A9,ALOX5AP,PPARG,SOAT1,PTGDR
GO: Molecular Function	GO:0050664	oxidoreductase activity, acting on NAD(P)H, oxygen as acceptor			0.001033	1	0.009458	0.07153	5	34	CYBB,SLAMF8,NCF2,NCF4,CYB5R4
GO: Molecular Function	GO:0016829	lyase activity			0.001092	1	0.009911	0.07495	26	581	NPL,ABCA1,ADGRE2,ME1,ADCY7,CCR2,ADORA2B,CXCL9,PLN,ALOX5AP,GPR65,FPR1,IGF1,MARCO,PTGDR,GNA15,SDS,TIGAR,NUPR1,RGS1,RGS2,EDNRA,RNASE1,RNASE2,TIMP2,CD38
GO: Molecular Function	GO:0015248	sterol transporter activity			0.001183	1	0.01065	0.08052	5	35	ABCA1,APOE,PPARG,ABCG1,NPC1
GO: Molecular Function	GO:0032395	MHC class II receptor activity			0.001305	1	0.01155	0.08736	3	10	HLA-DPA1,HLA-DQB1,HLA-DRA
GO: Molecular Function	GO:0071723	lipopeptide binding			0.001305	1	0.01155	0.08736	3	10	CD14,TLR1,TLR2
GO: Molecular Function	GO:0004222	metalloendopeptidase activity			0.001329	1	0.01167	0.08824	10	137	FAP,MMP1,MMP2,MMP9,MMP12,ADAMDEC1,RARRES1,ADAM12,TIMP1,TIMP2
GO: Molecular Function	GO:0005044	scavenger receptor activity			0.001352	1	0.01178	0.08905	6	53	CD163,COLEC12,MSR1,MARCO,ACKR3,CD36
GO: Molecular Function	GO:0120020	cholesterol transfer activity			0.001481	1	0.0128	0.09679	4	22	ABCA1,APOE,PPARG,ABCG1
GO: Molecular Function	GO:0034988	Fc-gamma receptor I complex binding			0.001576	1	0.0134	0.1013	2	3	FGR,LGALS3
GO: Molecular Function	GO:0001850	complement component C3a binding			0.001576	1	0.0134	0.1013	2	3	CR1,C3AR1
GO: Molecular Function	GO:0120015	sterol transfer activity			0.001761	1	0.01477	0.1117	4	23	ABCA1,APOE,PPARG,ABCG1
GO: Molecular Function	GO:0030023	extracellular matrix constituent conferring elasticity			0.001764	1	0.01477	0.1117	3	11	FBN1,EMILIN1,MFAP5
GO: Molecular Function	GO:0008237	metallopeptidase activity			0.001826	1	0.01517	0.1147	13	219	FAP,MMP1,MMP2,MMP9,MMP12,CPA3,ADAMDEC1,ERAP2,DPEP2,RARRES1,ADAM12,TIMP1,TIMP2
GO: Molecular Function	GO:0005509	calcium ion binding			0.001925	1	0.01587	0.12	30	734	ACTN1,ADGRE2,S100A8,S100A9,S100A11,S100A12,FBLN1,FBN1,MGP,AIF1,MMP12,PLN,SELL,COMP,ANXA1,AOAH,MMRN1,VCAN,MYO5A,ASPN,CLEC4A,SULF1,C1R,C1S,LCP1,THBD,THBS1,THBS2,MCTP1,CD69
GO: Molecular Function	GO:0015485	cholesterol binding			0.001978	1	0.01618	0.1224	6	57	ABCA1,APOE,PPARG,ABCG1,SOAT1,NPC1
GO: Molecular Function	GO:0140272	exogenous protein binding			0.002012	1	0.01622	0.1226	7	77	CLEC5A,CCR5,MRC1,ICAM1,CR1,NPC1,CD86
GO: Molecular Function	GO:0001618	virus receptor activity			0.002012	1	0.01622	0.1226	7	77	CLEC5A,CCR5,MRC1,ICAM1,CR1,NPC1,CD86
GO: Molecular Function	GO:0005537	mannose binding			0.002075	1	0.01648	0.1246	4	24	MAN2B1,MRC1,CLEC4A,M6PR
GO: Molecular Function	GO:0097199	cysteine-type endopeptidase activity involved in apoptotic signaling pathway			0.002075	1	0.01648	0.1246	4	24	PLAUR,MMP9,FAS,CASP1
GO: Molecular Function	GO:0042056	chemoattractant activity			0.002182	1	0.0172	0.1301	5	40	FGF7,CCL5,GPNMB,SCG2,LGALS3
GO: Molecular Function	GO:0016004	phospholipase activator activity			0.002311	1	0.01809	0.1368	3	12	CCL5,CCL8,GM2A
GO: Molecular Function	GO:0023023	MHC protein complex binding			0.002425	1	0.01885	0.1425	4	25	HLA-DMA,LILRB2,HLA-DRA,LILRB1
GO: Molecular Function	GO:0004435	phosphatidylinositol phospholipase C activity			0.002815	1	0.02171	0.1642	4	26	CCR1,CCL5,CCR5,EDNRA
GO: Molecular Function	GO:0097493	structural molecule activity conferring elasticity			0.002954	1	0.02215	0.1675	3	13	FBN1,EMILIN1,MFAP5
GO: Molecular Function	GO:0033691	sialic acid binding			0.002954	1	0.02215	0.1675	3	13	FCN1,ST8SIA4,CD33
GO: Molecular Function	GO:0001608	G protein-coupled nucleotide receptor activity			0.002954	1	0.02215	0.1675	3	13	GPR171,PTAFR,P2RY14
GO: Molecular Function	GO:0045028	G protein-coupled purinergic nucleotide receptor activity			0.002954	1	0.02215	0.1675	3	13	GPR171,PTAFR,P2RY14
GO: Molecular Function	GO:0016504	peptidase activator activity			0.003016	1	0.0224	0.1694	5	43	FBLN1,FN1,PYCARD,CASP1,PCOLCE
GO: Molecular Function	GO:0043178	alcohol binding			0.003028	1	0.0224	0.1694	8	105	ABCA1,APOE,PPARG,ABCG1,SOAT1,ADAP2,MYO5A,NPC1
GO: Molecular Function	GO:0023025	MHC class Ib protein complex binding			0.003103	1	0.02264	0.1712	2	4	LILRB2,LILRB1
GO: Molecular Function	GO:0032396	inhibitory MHC class I receptor activity			0.003103	1	0.02264	0.1712	2	4	LILRB2,LILRB1
GO: Molecular Function	GO:0003924	GTPase activity			0.003374	1	0.02446	0.185	31	796	CORO1C,CCL2,CCL4,CCL5,CCL7,CCL8,CCL11,CCL18,CCL20,VAV1,GPR65,ICAM1,DOCK10,RND3,ARHGDIB,PYCARD,MX2,ADAP2,GBP2,GEM,GNA15,ARHGAP25,RAC2,DOCK2,RAB31,RAP2B,RGS1,RGS2,ARL4C,PLXNC1,NCKAP1L
GO: Molecular Function	GO:0120013	lipid transfer activity			0.003687	1	0.02641	0.1997	5	45	ABCA1,PLTP,APOE,PPARG,ABCG1
GO: Molecular Function	GO:0060229	lipase activator activity			0.003695	1	0.02641	0.1997	3	14	CCL5,CCL8,GM2A
GO: Molecular Function	GO:0016702	oxidoreductase activity, acting on single donors with incorporation of molecular oxygen, incorporation of two atoms of oxygen			0.003717	1	0.02641	0.1997	4	28	ALOX5,ALOX5AP,PTGS2,TDO2
GO: Molecular Function	GO:0016701	oxidoreductase activity, acting on single donors with incorporation of molecular oxygen			0.004234	1	0.02989	0.226	4	29	ALOX5,ALOX5AP,PTGS2,TDO2
GO: Molecular Function	GO:0003779	actin binding			0.004373	1	0.03067	0.2319	20	451	CORO1C,ACTN1,AIF1,CCR5,CNN1,GMFG,GAS7,MYO1F,PHACTR1,MYO5A,FXYD5,NOD2,PDLIM3,KCNMA1,TAGLN,CAPG,LCP1,ARPC1B,CORO1A,HCLS1
GO: Molecular Function	GO:0004666	prostaglandin-endoperoxide synthase activity			0.005092	1	0.03503	0.2649	2	5	PTGS2,NOD2
GO: Molecular Function	GO:0048030	disaccharide binding			0.005092	1	0.03503	0.2649	2	5	LGALS1,LGALS3
GO: Molecular Function	GO:0004982	N-formyl peptide receptor activity			0.005092	1	0.03503	0.2649	2	5	FPR1,FPR3
GO: Molecular Function	GO:0008191	metalloendopeptidase inhibitor activity			0.005493	1	0.03708	0.2804	3	16	RARRES1,TIMP1,TIMP2
GO: Molecular Function	GO:0050700	CARD domain binding			0.005493	1	0.03708	0.2804	3	16	RIPK2,NOD2,CASP1
GO: Molecular Function	GO:0070492	oligosaccharide binding			0.005493	1	0.03708	0.2804	3	16	SELL,LGALS1,LGALS3
GO: Molecular Function	GO:0005543	phospholipid binding			0.005681	1	0.03811	0.2882	20	462	ABCA1,CD300A,BIN2,EEA1,PLEK,PLTP,ANXA1,RUBCNL,APOC1,APOE,ABCG1,JCHAIN,ADAP2,NCF4,PTAFR,BTK,PLA2G7,THBS1,MCTP1,TREM2
GO: Molecular Function	GO:0042289	MHC class II protein binding			0.006557	1	0.04371	0.3306	3	17	HLA-DPA1,HLA-DQB1,HLA-DRA
GO: Molecular Function	GO:0048365	Rac GTPase binding			0.006818	1	0.04518	0.3416	6	73	CORO1C,VAV1,ARHGDIB,NCF2,DOCK2,NCKAP1L
GO: Molecular Function	GO:0034186	apolipoprotein A-I binding			0.007521	1	0.04826	0.365	2	6	ABCA1,TREM2
GO: Molecular Function	GO:0070051	fibrinogen binding			0.007521	1	0.04826	0.365	2	6	FBLN1,THBS1
GO: Molecular Function	GO:0004568	chitinase activity			0.007521	1	0.04826	0.365	2	6	CHI3L1,CHIT1
GO: Molecular Function	GO:0060228	phosphatidylcholine-sterol O-acyltransferase activator activity			0.007521	1	0.04826	0.365	2	6	APOC1,APOE
GO: Molecular Function	GO:0019863	IgE binding			0.007521	1	0.04826	0.365	2	6	FCER1G,LGALS3
GO: Molecular Function	GO:0042605	peptide antigen binding			0.007552	1	0.04826	0.365	4	34	HLA-DPA1,HLA-DPB1,HLA-DQB1,HLA-DRA
GO: Molecular Function	GO:0016175	superoxide-generating NADPH oxidase activity			0.007735	1	0.04885	0.3695	3	18	CYBB,NCF2,NCF4
GO: Molecular Function	GO:0008035	high-density lipoprotein particle binding			0.007735	1	0.04885	0.3695	3	18	ABCA1,CD36,TREM2
GO: Biological Process	GO:0001775	cell activation			2.302e-78	1.444e-74	1.444e-74	1.346e-73	174	1558	ATP8B4,CEBPB,MAN2B1,HLA-DMA,PDGFRA,HLA-DPA1,HLA-DPB1,LILRB2,CLEC5A,CD300A,ACTA2,VSIG4,CLEC7A,TCIRG1,TLR7,ACTN1,HMOX1,CHI3L1,CHIT1,ADGRE2,ADA,PLAC8,FABP5,CCR2,S100A8,ADORA2B,S100A9,TYROBP,S100A11,S100A12,CLC,FCER1G,FCGR2A,FCGR2B,FCGR3B,FCN1,PIK3CG,MICB,AHR,AIF1,CCL2,CCL5,PLAUR,BIN2,GPNMB,CCL20,FGR,MERTK,PLEK,MMP9,MNDA,HSPA6,ALOX5,VAV1,COL1A1,COL1A2,COL3A1,SELL,VWF,COMP,FN1,LAT2,ANXA1,MAP3K8,FPR1,I…
GO: Biological Process	GO:0045321	leukocyte activation			1.441e-70	9.041e-67	4.52e-67	4.213e-66	157	1385	ATP8B4,CEBPB,MAN2B1,HLA-DMA,HLA-DPA1,HLA-DPB1,LILRB2,CLEC5A,CD300A,VSIG4,CLEC7A,TCIRG1,TLR7,HMOX1,CHI3L1,CHIT1,ADGRE2,ADA,PLAC8,FABP5,CCR2,S100A8,ADORA2B,S100A9,TYROBP,S100A11,S100A12,CLC,FCER1G,FCGR2A,FCGR2B,FCGR3B,FCN1,PIK3CG,MICB,AHR,AIF1,CCL2,CCL5,PLAUR,BIN2,GPNMB,CCL20,FGR,MERTK,MMP9,MNDA,HSPA6,ALOX5,VAV1,SELL,LAT2,ANXA1,MAP3K8,FPR1,ICAM1,GMFG,DOCK10,PPARG,PPBP,CR1,FAS,MILR1,SLC2A3,RSAD2,IGF…
GO: Biological Process	GO:0006952	defense response			5.71e-70	3.581e-66	1.194e-66	1.113e-65	178	1849	CFH,EREG,CEBPB,HLA-DPA1,HLA-DPB1,HLA-DQB1,LILRB2,CLEC5A,CD300A,HLA-DRA,ACP5,HLA-DRB4,SERPINF1,VSIG4,CLEC7A,TCIRG1,TLR7,HMOX1,LY96,CHI3L1,ADGRE2,ADA,ADCY7,CD163,PLAC8,FABP4,CCR2,S100A8,ADORA2B,S100A9,TYROBP,COLEC12,S100A12,ADORA3,FCER1G,FCGR1B,FCGR2B,FCN1,PIK3CG,MICB,CXCL9,HRH1,AIF1,CCL2,CCR1,CCL4,CCL5,CCL7,CCR5,CCL8,CCL11,MMP2,CCL18,CCL20,FGR,CLEC10A,MMP9,MMP12,AIM2,LY86,MNDA,ALOX5,ALOX5AP,VAV1,T…
GO: Biological Process	GO:0002252	immune effector process			1.259e-66	7.894e-63	1.973e-63	1.839e-62	150	1332	CFH,ATP8B4,CEBPB,MAN2B1,HLA-DMA,HLA-DQB1,LILRB2,CLEC5A,CD300A,VSIG4,TCIRG1,TLR7,HMOX1,CHI3L1,CHIT1,ADGRE2,ADA,PLAC8,FABP5,CCR2,S100A8,ADORA2B,S100A9,TYROBP,S100A11,S100A12,CLC,FCER1G,FCGR2A,FCGR2B,FCGR3B,FCN1,PIK3CG,MICB,CXCL9,CCL2,CCL5,PLAUR,BIN2,CCL20,FGR,MMP9,MMP12,AIM2,MNDA,HSPA6,ALOX5,VAV1,SELL,LAT2,ANXA1,FPR1,ICAM1,RGCC,GMFG,DOCK10,SAMHD1,PPBP,CR1,FAS,MILR1,SLC2A3,RSAD2,PYCARD,IGKC,RNASET2,…
GO: Biological Process	GO:0002682	regulation of immune system process			1.272e-62	7.978e-59	1.596e-59	1.487e-58	166	1775	CFH,EREG,CEBPB,HLA-DMA,HLA-DPA1,HLA-DPB1,HLA-DQB1,LILRB2,CD300A,HLA-DRA,HLA-DRB4,VSIG4,CLEC7A,EVI2B,TLR7,HMOX1,LY96,ADGRE2,ADA,ADCY7,CCR2,S100A8,ADORA2B,S100A9,TYROBP,COLEC12,FBN1,CLC,FCER1G,FCGR1B,FCGR2A,FCGR2B,FCN1,MICB,LPXN,AHR,AIF1,CCL2,CCR1,CCL4,CCL5,CCL7,CCL8,GPR171,GPNMB,MMP2,CCL20,FGR,MERTK,CLEC10A,MMP9,MMP12,AIM2,MNDA,VAV1,COL1A1,COL1A2,COL3A1,THEMIS2,MPP1,SELL,LAT2,PILRA,ANXA1,MAP3K8,FP…
GO: Biological Process	GO:0002274	myeloid leukocyte activation			1.763e-59	1.106e-55	1.843e-56	1.718e-55	106	683	ATP8B4,MAN2B1,LILRB2,CLEC5A,CD300A,VSIG4,TCIRG1,TLR7,HMOX1,CHI3L1,CHIT1,ADGRE2,PLAC8,FABP5,CCR2,S100A8,ADORA2B,S100A9,TYROBP,S100A11,S100A12,FCER1G,FCGR2A,FCGR2B,FCGR3B,FCN1,PIK3CG,AIF1,CCL5,PLAUR,BIN2,FGR,MMP9,MNDA,HSPA6,ALOX5,SELL,LAT2,FPR1,GMFG,PPARG,PPBP,CR1,MILR1,SLC2A3,PYCARD,RNASET2,MYO1F,CSTB,FUCA1,CTSD,FYB1,CTSS,IL6,CTSZ,CXCL8,CXCR2,CYBB,IL10,PTAFR,ITGAM,HPSE,ITGAX,ADA2,ITGB2,CD84,CFD,PT…
GO: Biological Process	GO:0006954	inflammatory response			6.768e-59	4.245e-55	6.064e-56	5.652e-55	113	805	CEBPB,CD300A,ACP5,SERPINF1,CLEC7A,TCIRG1,TLR7,HMOX1,LY96,CHI3L1,ADGRE2,ADA,ADCY7,CD163,FABP4,CCR2,S100A8,ADORA2B,S100A9,TYROBP,S100A12,ADORA3,FCER1G,FCGR2B,PIK3CG,CXCL9,HRH1,AIF1,CCL2,CCR1,CCL4,CCL5,CCL7,CCR5,CCL8,CCL11,CCL18,CCL20,MMP9,AIM2,LY86,ALOX5,ALOX5AP,THEMIS2,FN1,ANXA1,FOLR2,FPR1,FPR3,ICAM1,AOAH,APOE,PPARG,PPBP,IGF1,PYCARD,IL1RN,CTSS,IL6,CXCL8,CXCR2,CYBB,SLAMF8,IL10,NAIP,RIPK2,PTAFR,PTGD…
GO: Biological Process	GO:0002366	leukocyte activation involved in immune response			2.282e-58	1.431e-54	1.789e-55	1.668e-54	108	732	ATP8B4,MAN2B1,LILRB2,CLEC5A,CD300A,TCIRG1,HMOX1,CHI3L1,CHIT1,ADGRE2,ADA,PLAC8,FABP5,CCR2,S100A8,ADORA2B,S100A9,TYROBP,S100A11,S100A12,FCER1G,FCGR2A,FCGR2B,FCGR3B,FCN1,PIK3CG,PLAUR,BIN2,CCL20,FGR,MMP9,MNDA,HSPA6,ALOX5,SELL,LAT2,ANXA1,FPR1,ICAM1,GMFG,DOCK10,PPBP,CR1,MILR1,SLC2A3,PYCARD,RNASET2,MYO1F,CSTB,FUCA1,CTSD,CTSS,IL6,CTSZ,CXCR2,CYBB,IL10,RIPK2,PTAFR,ITGAM,HPSE,ITGAX,ADA2,ITGB2,LILRB1,CD84,CF…
GO: Biological Process	GO:0002263	cell activation involved in immune response			4.021e-58	2.522e-54	2.802e-55	2.612e-54	108	736	ATP8B4,MAN2B1,LILRB2,CLEC5A,CD300A,TCIRG1,HMOX1,CHI3L1,CHIT1,ADGRE2,ADA,PLAC8,FABP5,CCR2,S100A8,ADORA2B,S100A9,TYROBP,S100A11,S100A12,FCER1G,FCGR2A,FCGR2B,FCGR3B,FCN1,PIK3CG,PLAUR,BIN2,CCL20,FGR,MMP9,MNDA,HSPA6,ALOX5,SELL,LAT2,ANXA1,FPR1,ICAM1,GMFG,DOCK10,PPBP,CR1,MILR1,SLC2A3,PYCARD,RNASET2,MYO1F,CSTB,FUCA1,CTSD,CTSS,IL6,CTSZ,CXCR2,CYBB,IL10,RIPK2,PTAFR,ITGAM,HPSE,ITGAX,ADA2,ITGB2,LILRB1,CD84,CF…
GO: Biological Process	GO:0002443	leukocyte mediated immunity			2.044e-57	1.282e-53	1.282e-54	1.195e-53	118	918	ATP8B4,MAN2B1,HLA-DMA,HLA-DQB1,LILRB2,CLEC5A,CD300A,TCIRG1,HMOX1,CHI3L1,CHIT1,ADGRE2,PLAC8,FABP5,CCR2,S100A8,ADORA2B,S100A9,TYROBP,S100A11,S100A12,CLC,FCER1G,FCGR2A,FCGR2B,FCGR3B,FCN1,PIK3CG,MICB,PLAUR,BIN2,CCL20,FGR,MMP9,MNDA,HSPA6,ALOX5,VAV1,SELL,LAT2,FPR1,ICAM1,GMFG,PPBP,CR1,FAS,MILR1,SLC2A3,RSAD2,PYCARD,IGKC,RNASET2,MYO1F,CSTB,IGLC1,FUCA1,SLAMF7,CTSD,CTSS,IL6,CTSZ,IL7R,CXCR2,CYBB,IL10,PTAFR,I…
GO: Biological Process	GO:0050776	regulation of immune response			2.765e-55	1.734e-51	1.577e-52	1.47e-51	129	1170	CFH,EREG,HLA-DMA,HLA-DPA1,HLA-DPB1,HLA-DQB1,LILRB2,CD300A,HLA-DRA,HLA-DRB4,VSIG4,CLEC7A,TLR7,HMOX1,LY96,ADGRE2,ADA,ADCY7,CCR2,S100A8,ADORA2B,S100A9,TYROBP,COLEC12,CLC,FCER1G,FCGR1B,FCGR2A,FCGR2B,FCN1,MICB,LPXN,CCL5,MMP2,CCL20,FGR,CLEC10A,MMP12,AIM2,MNDA,VAV1,COL1A1,COL1A2,COL3A1,THEMIS2,SELL,LAT2,PILRA,ANXA1,FPR1,FPR3,ICAM1,RGCC,SAMHD1,APOE,PPARG,CR1,RSAD2,PYCARD,IGKC,MYO1F,IGLC1,SLAMF7,FYB1,CTSL…
GO: Biological Process	GO:0051707	response to other organism			2.4e-53	1.506e-49	1.255e-50	1.169e-49	147	1604	CFH,ABCA1,CD52,EREG,CEBPB,HLA-DPA1,HLA-DPB1,HLA-DQB1,LILRB2,CLEC5A,CD300A,HLA-DRA,ACP5,HLA-DRB4,ACTA2,VSIG4,CLEC7A,TLR7,LY96,CHIT1,PLAC8,FABP4,S100A8,S100A9,TYROBP,COLEC12,S100A12,FCER1G,FCGR1B,FCGR2B,FCN1,PIK3CG,MICB,CXCL9,AIF1,CCL2,CCL4,CCL5,CCL7,CCR5,CCL8,CCL11,MMP2,CCL18,CCL20,FGR,CLEC10A,MMP12,AIM2,LY86,MNDA,VAV1,MRC1,ANXA1,TENT5A,ICAM1,IRF8,SAMHD1,APOE,PPARG,PPBP,CR1,RSAD2,CSF2RB,PYCARD,JCH…
GO: Biological Process	GO:0043207	response to external biotic stimulus			2.816e-53	1.766e-49	1.359e-50	1.266e-49	147	1606	CFH,ABCA1,CD52,EREG,CEBPB,HLA-DPA1,HLA-DPB1,HLA-DQB1,LILRB2,CLEC5A,CD300A,HLA-DRA,ACP5,HLA-DRB4,ACTA2,VSIG4,CLEC7A,TLR7,LY96,CHIT1,PLAC8,FABP4,S100A8,S100A9,TYROBP,COLEC12,S100A12,FCER1G,FCGR1B,FCGR2B,FCN1,PIK3CG,MICB,CXCL9,AIF1,CCL2,CCL4,CCL5,CCL7,CCR5,CCL8,CCL11,MMP2,CCL18,CCL20,FGR,CLEC10A,MMP12,AIM2,LY86,MNDA,VAV1,MRC1,ANXA1,TENT5A,ICAM1,IRF8,SAMHD1,APOE,PPARG,PPBP,CR1,RSAD2,CSF2RB,PYCARD,JCH…
GO: Biological Process	GO:0009607	response to biotic stimulus			3.917e-53	2.456e-49	1.755e-50	1.635e-49	148	1633	CFH,ABCA1,CD52,EREG,CEBPB,HLA-DPA1,HLA-DPB1,HLA-DQB1,LILRB2,CLEC5A,CD300A,HLA-DRA,ACP5,HLA-DRB4,ACTA2,VSIG4,CLEC7A,TLR7,LY96,CHIT1,PLAC8,FABP4,S100A8,S100A9,TYROBP,COLEC12,S100A12,FCER1G,FCGR1B,FCGR2B,FCN1,PIK3CG,MICB,CXCL9,AIF1,CCL2,CCL4,CCL5,CCL7,CCR5,CCL8,CCL11,MMP2,CCL18,CCL20,FGR,CLEC10A,MMP12,AIM2,LY86,MNDA,VAV1,MRC1,ANXA1,TENT5A,ICAM1,IRF8,SAMHD1,APOE,PPARG,PPBP,CR1,RSAD2,CSF2RB,PYCARD,JCH…
GO: Biological Process	GO:0043299	leukocyte degranulation			1.982e-52	1.243e-48	8.288e-50	7.725e-49	90	546	ATP8B4,MAN2B1,LILRB2,CLEC5A,CD300A,TCIRG1,HMOX1,CHI3L1,CHIT1,ADGRE2,PLAC8,FABP5,CCR2,S100A8,ADORA2B,S100A9,TYROBP,S100A11,S100A12,FCER1G,FCGR2A,FCGR2B,FCGR3B,FCN1,PIK3CG,PLAUR,BIN2,FGR,MMP9,MNDA,HSPA6,ALOX5,SELL,LAT2,FPR1,GMFG,PPBP,CR1,MILR1,SLC2A3,PYCARD,RNASET2,MYO1F,CSTB,FUCA1,CTSD,CTSS,CTSZ,CXCR2,CYBB,PTAFR,ITGAM,HPSE,ITGAX,ADA2,ITGB2,CD84,CFD,PTPRC,BTK,GM2A,PYGL,C3,C3AR1,C5AR1,RAC2,DOCK2,GLI…
GO: Biological Process	GO:0032940	secretion by cell			2.931e-52	1.838e-48	1.149e-49	1.071e-48	149	1682	ABCA1,ATP8B4,MAN2B1,LILRB2,CLEC5A,CD300A,TCIRG1,ACTN1,HMOX1,CHI3L1,CHIT1,ADGRE2,PLAC8,FABP5,TWIST1,CCR2,S100A8,ADORA2B,S100A9,TYROBP,S100A11,S100A12,FBLN1,FCER1G,FCGR2A,FCGR2B,FCGR3B,FCN1,PIK3CG,UCP2,AIF1,FGF7,CCR1,CCL5,PLAUR,BIN2,CCL8,FGR,MERTK,PLEK,MMP9,MMP12,AIM2,MNDA,HSPA6,ALOX5,SELL,VWF,COMP,FN1,LAT2,ANXA1,FPR1,RGCC,GMFG,APOE,PPARG,PPBP,CR1,SLC1A3,MILR1,SLC2A3,MMRN1,POSTN,ABCG1,RSAD2,IGF1,SR…
GO: Biological Process	GO:0140352	export from cell			1.875e-51	1.176e-47	6.918e-49	6.448e-48	150	1730	ABCA1,ATP8B4,MAN2B1,LILRB2,CLEC5A,CD300A,TCIRG1,ACTN1,HMOX1,CHI3L1,CHIT1,ADGRE2,PLAC8,FABP5,TWIST1,CCR2,S100A8,ADORA2B,S100A9,TYROBP,S100A11,S100A12,FBLN1,KCNE4,FCER1G,FCGR2A,FCGR2B,FCGR3B,FCN1,PIK3CG,UCP2,AIF1,FGF7,CCR1,CCL5,PLAUR,BIN2,CCL8,FGR,MERTK,PLEK,MMP9,MMP12,AIM2,MNDA,HSPA6,ALOX5,SELL,VWF,COMP,FN1,LAT2,ANXA1,FPR1,RGCC,GMFG,APOE,PPARG,PPBP,CR1,SLC1A3,MILR1,SLC2A3,MMRN1,POSTN,ABCG1,RSAD2,I…
GO: Biological Process	GO:0002684	positive regulation of immune system process			3.083e-51	1.934e-47	1.074e-48	1.001e-47	129	1268	CFH,EREG,HLA-DMA,HLA-DPA1,HLA-DPB1,HLA-DQB1,LILRB2,CD300A,HLA-DRA,HLA-DRB4,VSIG4,CLEC7A,EVI2B,TLR7,HMOX1,LY96,ADGRE2,ADA,CCR2,S100A8,ADORA2B,S100A9,TYROBP,COLEC12,FCER1G,FCGR2A,FCGR2B,FCN1,MICB,LPXN,AIF1,CCL2,CCR1,CCL4,CCL5,CCL7,CCL8,MMP2,CCL20,FGR,CLEC10A,MMP9,MMP12,AIM2,MNDA,VAV1,THEMIS2,SELL,LAT2,ANXA1,MAP3K8,FPR1,FPR3,ICAM1,RGCC,CR1,RSAD2,IGF1,PYCARD,IGKC,IGLC1,FYB1,CTSL,MARCO,CTSS,IL6,IL7R,C…
GO: Biological Process	GO:0046903	secretion			3.473e-51	2.178e-47	1.147e-48	1.069e-47	154	1834	ABCA1,ATP8B4,MAN2B1,LILRB2,CLEC5A,CD300A,TCIRG1,ACTN1,HMOX1,CHI3L1,CHIT1,ADGRE2,ADA,PLAC8,FABP5,TWIST1,CCR2,S100A8,ADORA2B,S100A9,TYROBP,S100A11,S100A12,FBLN1,FCER1G,FCGR2A,FCGR2B,FCGR3B,FCN1,PIK3CG,UCP2,AIF1,FGF7,CCR1,CCL5,PLAUR,BIN2,CCL8,FGR,MERTK,PLEK,MMP9,MMP12,AIM2,MNDA,HSPA6,ALOX5,SELL,VWF,COMP,FN1,LAT2,ANXA1,FPR1,RGCC,GMFG,APOE,PPARG,PPBP,CR1,SLC1A3,AQP9,MILR1,SLC2A3,MMRN1,POSTN,ABCG1,RSAD…
GO: Biological Process	GO:0002444	myeloid leukocyte mediated immunity			6.398e-51	4.013e-47	2.006e-48	1.87e-47	90	568	ATP8B4,MAN2B1,LILRB2,CLEC5A,CD300A,TCIRG1,HMOX1,CHI3L1,CHIT1,ADGRE2,PLAC8,FABP5,CCR2,S100A8,ADORA2B,S100A9,TYROBP,S100A11,S100A12,FCER1G,FCGR2A,FCGR2B,FCGR3B,FCN1,PIK3CG,PLAUR,BIN2,FGR,MMP9,MNDA,HSPA6,ALOX5,SELL,LAT2,FPR1,GMFG,PPBP,CR1,MILR1,SLC2A3,PYCARD,RNASET2,MYO1F,CSTB,FUCA1,CTSD,CTSS,IL6,CTSZ,CXCR2,CYBB,PTAFR,ITGAM,HPSE,ITGAX,ADA2,ITGB2,CD84,CFD,PTPRC,BTK,GM2A,PYGL,C3,C3AR1,C5AR1,RAC2,DOCK2…
GO: Biological Process	GO:0002275	myeloid cell activation involved in immune response			1.19e-50	7.465e-47	3.555e-48	3.313e-47	89	557	ATP8B4,MAN2B1,LILRB2,CLEC5A,CD300A,TCIRG1,HMOX1,CHI3L1,CHIT1,ADGRE2,PLAC8,FABP5,CCR2,S100A8,ADORA2B,S100A9,TYROBP,S100A11,S100A12,FCER1G,FCGR2A,FCGR3B,FCN1,PIK3CG,PLAUR,BIN2,FGR,MMP9,MNDA,HSPA6,ALOX5,SELL,LAT2,FPR1,GMFG,PPBP,CR1,MILR1,SLC2A3,PYCARD,RNASET2,MYO1F,CSTB,FUCA1,CTSD,CTSS,CTSZ,CXCR2,CYBB,PTAFR,ITGAM,HPSE,ITGAX,ADA2,ITGB2,CD84,CFD,PTPRC,BTK,GM2A,PYGL,C3,C3AR1,C5AR1,IL33,RAC2,DOCK2,GLIPR…
GO: Biological Process	GO:0098542	defense response to other organism			7.209e-48	4.521e-44	2.055e-45	1.916e-44	124	1250	CFH,EREG,CEBPB,HLA-DPA1,HLA-DPB1,HLA-DQB1,CLEC5A,CD300A,HLA-DRA,ACP5,HLA-DRB4,VSIG4,CLEC7A,TLR7,LY96,PLAC8,S100A8,S100A9,TYROBP,COLEC12,S100A12,FCER1G,FCGR1B,FCGR2B,FCN1,PIK3CG,MICB,CXCL9,AIF1,CCL2,CCL4,CCL5,CCL7,CCL8,CCL11,MMP2,CCL18,CCL20,FGR,CLEC10A,MMP12,AIM2,LY86,MNDA,VAV1,MRC1,ANXA1,ICAM1,IRF8,SAMHD1,APOE,PPARG,PPBP,CR1,RSAD2,PYCARD,JCHAIN,IGKC,MYO1F,IGLC1,XAF1,SLAMF7,CTSL,MARCO,CTSS,IL6,MX…
GO: Biological Process	GO:0016050	vesicle organization			1.628e-47	1.021e-43	4.44e-45	4.139e-44	147	1784	ABCA1,ATP8B4,MAN2B1,LILRB2,CLEC5A,CD300A,CORO1C,CLEC7A,TCIRG1,ACTN1,HMOX1,CHI3L1,CHIT1,ADGRE2,CD163,PLAC8,FABP5,CCR2,S100A8,ADORA2B,S100A9,TYROBP,COLEC12,S100A11,S100A12,FCER1G,FCGR1B,FCGR2A,FCGR2B,FCGR3B,FCN1,PIK3CG,AIF1,CCR1,CCL5,PLAUR,BIN2,CCL8,SRPX,EEA1,FGR,PLEK,CLEC10A,MMP9,MNDA,HSPA6,ALOX5,SELL,MRC1,SFRP4,VWF,FN1,LAT2,ANXA1,FOLR2,FPR1,RUBCNL,GMFG,APOC1,APOE,PPARG,PPBP,CR1,MILR1,SLC2A3,AREG,…
GO: Biological Process	GO:0045055	regulated exocytosis			5.479e-47	3.436e-43	1.432e-44	1.335e-43	102	837	ATP8B4,MAN2B1,LILRB2,CLEC5A,CD300A,TCIRG1,ACTN1,HMOX1,CHI3L1,CHIT1,ADGRE2,PLAC8,FABP5,CCR2,S100A8,ADORA2B,S100A9,TYROBP,S100A11,S100A12,FCER1G,FCGR2A,FCGR2B,FCGR3B,FCN1,PIK3CG,PLAUR,BIN2,FGR,PLEK,MMP9,MNDA,HSPA6,ALOX5,SELL,VWF,FN1,LAT2,FPR1,GMFG,PPBP,CR1,MILR1,SLC2A3,MMRN1,IGF1,SRGN,PYCARD,RNASET2,MYO1F,CSTB,FUCA1,CTSD,CTSS,CTSZ,CXCR2,CYBB,ISLR,PTAFR,ITGAM,HPSE,ITGAX,ADA2,ITGB2,CD84,CFD,PTPRC,BTK…
GO: Biological Process	GO:0050900	leukocyte migration			3.579e-46	2.245e-42	8.979e-44	8.37e-43	83	534	CD300A,HMOX1,ADGRE2,ADA,CCR2,S100A8,S100A9,S100A12,FCER1G,PIK3CG,CXCL9,HRH1,AIF1,CCL2,CCR1,CCL4,CCL5,CCL7,CCR5,CCL8,CCL11,MMP1,CCL18,CCL20,MERTK,MMP9,VAV1,COL1A1,COL1A2,MPP1,SELL,FN1,ANXA1,FOLR2,ICAM1,PPBP,PYCARD,JCHAIN,IGKC,SDC3,IGLC1,IL1RN,IL6,CXCL8,CXCR2,SLAMF8,IL10,LGMN,PTPN22,ITGA4,PTAFR,ITGAM,ITGAX,ITGB2,NOD2,CD84,SCG2,C3AR1,C5AR1,IL33,RAC2,PLA2G7,GPR183,CXCL2,CXCL3,EMILIN1,OLR1,LEP,EDNRA,L…
GO: Biological Process	GO:0061025	membrane fusion			3.773e-46	2.367e-42	9.102e-44	8.484e-43	115	1107	ATP8B4,MAN2B1,LILRB2,CLEC5A,CD300A,TCIRG1,ACTN1,HMOX1,CHI3L1,CHIT1,ADGRE2,PLAC8,FABP5,CCR2,S100A8,ADORA2B,S100A9,TYROBP,S100A11,S100A12,FCER1G,FCGR2A,FCGR2B,FCGR3B,FCN1,PIK3CG,CXCL9,CCR1,CCL5,PLAUR,CCR5,BIN2,CCL8,EEA1,FGR,PLEK,MMP9,MNDA,HSPA6,ALOX5,SELL,VWF,FN1,LAT2,ANXA1,FOLR2,FPR1,RUBCNL,GMFG,PPBP,CR1,MILR1,SLC2A3,MMRN1,IGF1,SRGN,PYCARD,RNASET2,MYO1F,CSTB,FUCA1,CTSD,CTSS,CTSZ,MX2,CXCR2,CYBB,MYO…
GO: Biological Process	GO:0006887	exocytosis			5.939e-46	3.725e-42	1.284e-43	1.197e-42	107	953	ATP8B4,MAN2B1,LILRB2,CLEC5A,CD300A,TCIRG1,ACTN1,HMOX1,CHI3L1,CHIT1,ADGRE2,PLAC8,FABP5,CCR2,S100A8,ADORA2B,S100A9,TYROBP,S100A11,S100A12,FCER1G,FCGR2A,FCGR2B,FCGR3B,FCN1,PIK3CG,CCR1,CCL5,PLAUR,BIN2,CCL8,FGR,PLEK,MMP9,MNDA,HSPA6,ALOX5,SELL,VWF,FN1,LAT2,ANXA1,FPR1,GMFG,PPBP,CR1,MILR1,SLC2A3,MMRN1,IGF1,SRGN,PYCARD,RNASET2,MYO1F,CSTB,FUCA1,CTSD,CTSS,CTSZ,CXCR2,CYBB,MYO5A,ISLR,PTAFR,ITGAM,HPSE,ITGAX,AD…
GO: Biological Process	GO:0140029	exocytic process			5.939e-46	3.725e-42	1.284e-43	1.197e-42	107	953	ATP8B4,MAN2B1,LILRB2,CLEC5A,CD300A,TCIRG1,ACTN1,HMOX1,CHI3L1,CHIT1,ADGRE2,PLAC8,FABP5,CCR2,S100A8,ADORA2B,S100A9,TYROBP,S100A11,S100A12,FCER1G,FCGR2A,FCGR2B,FCGR3B,FCN1,PIK3CG,CCR1,CCL5,PLAUR,BIN2,CCL8,FGR,PLEK,MMP9,MNDA,HSPA6,ALOX5,SELL,VWF,FN1,LAT2,ANXA1,FPR1,GMFG,PPBP,CR1,MILR1,SLC2A3,MMRN1,IGF1,SRGN,PYCARD,RNASET2,MYO1F,CSTB,FUCA1,CTSD,CTSS,CTSZ,CXCR2,CYBB,MYO5A,ISLR,PTAFR,ITGAM,HPSE,ITGAX,AD…
GO: Biological Process	GO:0099500	vesicle fusion to plasma membrane			5.939e-46	3.725e-42	1.284e-43	1.197e-42	107	953	ATP8B4,MAN2B1,LILRB2,CLEC5A,CD300A,TCIRG1,ACTN1,HMOX1,CHI3L1,CHIT1,ADGRE2,PLAC8,FABP5,CCR2,S100A8,ADORA2B,S100A9,TYROBP,S100A11,S100A12,FCER1G,FCGR2A,FCGR2B,FCGR3B,FCN1,PIK3CG,CCR1,CCL5,PLAUR,BIN2,CCL8,FGR,PLEK,MMP9,MNDA,HSPA6,ALOX5,SELL,VWF,FN1,LAT2,ANXA1,FPR1,GMFG,PPBP,CR1,MILR1,SLC2A3,MMRN1,IGF1,SRGN,PYCARD,RNASET2,MYO1F,CSTB,FUCA1,CTSD,CTSS,CTSZ,CXCR2,CYBB,MYO5A,ISLR,PTAFR,ITGAM,HPSE,ITGAX,AD…
GO: Biological Process	GO:0006906	vesicle fusion			1.775e-45	1.113e-41	3.711e-43	3.459e-42	109	1003	ATP8B4,MAN2B1,LILRB2,CLEC5A,CD300A,TCIRG1,ACTN1,HMOX1,CHI3L1,CHIT1,ADGRE2,PLAC8,FABP5,CCR2,S100A8,ADORA2B,S100A9,TYROBP,S100A11,S100A12,FCER1G,FCGR2A,FCGR2B,FCGR3B,FCN1,PIK3CG,CCR1,CCL5,PLAUR,BIN2,CCL8,EEA1,FGR,PLEK,MMP9,MNDA,HSPA6,ALOX5,SELL,VWF,FN1,LAT2,ANXA1,FPR1,RUBCNL,GMFG,PPBP,CR1,MILR1,SLC2A3,MMRN1,IGF1,SRGN,PYCARD,RNASET2,MYO1F,CSTB,FUCA1,CTSD,CTSS,CTSZ,CXCR2,CYBB,MYO5A,ISLR,PTAFR,ITGAM,H…
GO: Biological Process	GO:0090174	organelle membrane fusion			3.176e-45	1.992e-41	6.427e-43	5.99e-42	109	1009	ATP8B4,MAN2B1,LILRB2,CLEC5A,CD300A,TCIRG1,ACTN1,HMOX1,CHI3L1,CHIT1,ADGRE2,PLAC8,FABP5,CCR2,S100A8,ADORA2B,S100A9,TYROBP,S100A11,S100A12,FCER1G,FCGR2A,FCGR2B,FCGR3B,FCN1,PIK3CG,CCR1,CCL5,PLAUR,BIN2,CCL8,EEA1,FGR,PLEK,MMP9,MNDA,HSPA6,ALOX5,SELL,VWF,FN1,LAT2,ANXA1,FPR1,RUBCNL,GMFG,PPBP,CR1,MILR1,SLC2A3,MMRN1,IGF1,SRGN,PYCARD,RNASET2,MYO1F,CSTB,FUCA1,CTSD,CTSS,CTSZ,CXCR2,CYBB,MYO5A,ISLR,PTAFR,ITGAM,H…
GO: Biological Process	GO:0032101	regulation of response to external stimulus			6.298e-45	3.95e-41	1.234e-42	1.151e-41	118	1201	EREG,CEBPB,PDGFRA,CD300A,ACP5,SERPINF1,VSIG4,CLEC7A,TLR7,LY96,ADA,ADCY7,FABP4,CCR2,S100A8,ADORA2B,S100A9,COLEC12,S100A12,FAP,FCER1G,FCGR2B,FCN1,PIK3CG,MICB,AIF1,CCL2,CCR1,CCL4,CCL5,PLAUR,CCL7,MMP2,CCL18,FGR,PLEK,CLEC10A,MMP9,MMP12,AIM2,LY86,MNDA,ALOX5AP,VAV1,MPP1,SELL,FN1,ANXA1,AOAH,SAMHD1,APOE,PPARG,CR1,RSAD2,IGF1,PYCARD,MYO1F,CTSL,MARCO,CTSS,IL6,CXCL8,CXCR2,SLAMF8,IL10,LGMN,RIPK2,PTPN22,PTAFR,I…
GO: Biological Process	GO:0036230	granulocyte activation			6.629e-45	4.158e-41	1.26e-42	1.174e-41	80	508	ATP8B4,MAN2B1,LILRB2,CLEC5A,CD300A,TCIRG1,CHI3L1,CHIT1,PLAC8,FABP5,CCR2,S100A8,S100A9,TYROBP,S100A11,S100A12,FCER1G,FCGR2A,FCGR2B,FCGR3B,FCN1,CCL5,PLAUR,BIN2,FGR,MMP9,MNDA,HSPA6,ALOX5,SELL,FPR1,GMFG,PPBP,CR1,SLC2A3,PYCARD,RNASET2,MYO1F,CSTB,FUCA1,CTSD,CTSS,CTSZ,CXCL8,CXCR2,CYBB,PTAFR,ITGAM,HPSE,ITGAX,ADA2,ITGB2,CFD,PTPRC,GM2A,PYGL,C3,C3AR1,C5AR1,DOCK2,GLIPR1,CRISPLD2,RAB31,RAP2B,LAIR1,GRN,OLR1,LG…
GO: Biological Process	GO:0042119	neutrophil activation			2.617e-44	1.641e-40	4.828e-42	4.5e-41	79	502	ATP8B4,MAN2B1,LILRB2,CLEC5A,CD300A,TCIRG1,CHI3L1,CHIT1,PLAC8,FABP5,S100A8,S100A9,TYROBP,S100A11,S100A12,FCER1G,FCGR2A,FCGR2B,FCGR3B,FCN1,CCL5,PLAUR,BIN2,FGR,MMP9,MNDA,HSPA6,ALOX5,SELL,FPR1,GMFG,PPBP,CR1,SLC2A3,PYCARD,RNASET2,MYO1F,CSTB,FUCA1,CTSD,CTSS,CTSZ,CXCL8,CXCR2,CYBB,PTAFR,ITGAM,HPSE,ITGAX,ADA2,ITGB2,CFD,PTPRC,GM2A,PYGL,C3,C3AR1,C5AR1,DOCK2,GLIPR1,CRISPLD2,RAB31,RAP2B,LAIR1,GRN,OLR1,LGALS3,…
GO: Biological Process	GO:0048284	organelle fusion			2.842e-44	1.783e-40	5.093e-42	4.747e-41	109	1032	ATP8B4,MAN2B1,LILRB2,CLEC5A,CD300A,TCIRG1,ACTN1,HMOX1,CHI3L1,CHIT1,ADGRE2,PLAC8,FABP5,CCR2,S100A8,ADORA2B,S100A9,TYROBP,S100A11,S100A12,FCER1G,FCGR2A,FCGR2B,FCGR3B,FCN1,PIK3CG,CCR1,CCL5,PLAUR,BIN2,CCL8,EEA1,FGR,PLEK,MMP9,MNDA,HSPA6,ALOX5,SELL,VWF,FN1,LAT2,ANXA1,FPR1,RUBCNL,GMFG,PPBP,CR1,MILR1,SLC2A3,MMRN1,IGF1,SRGN,PYCARD,RNASET2,MYO1F,CSTB,FUCA1,CTSD,CTSS,CTSZ,CXCR2,CYBB,MYO5A,ISLR,PTAFR,ITGAM,H…
GO: Biological Process	GO:0045087	innate immune response			9.544e-44	5.986e-40	1.663e-41	1.55e-40	109	1045	CFH,EREG,HLA-DPA1,HLA-DPB1,HLA-DQB1,CLEC5A,CD300A,HLA-DRA,HLA-DRB4,VSIG4,CLEC7A,TLR7,LY96,S100A8,S100A9,TYROBP,COLEC12,S100A12,FCER1G,FCGR1B,FCGR2B,FCN1,PIK3CG,MICB,AIF1,CCL2,CCL4,CCL5,CCL7,CCL8,CCL11,MMP2,CCL18,CCL20,FGR,CLEC10A,MMP12,AIM2,LY86,MNDA,VAV1,MRC1,ANXA1,ICAM1,IRF8,SAMHD1,APOE,PPARG,CR1,RSAD2,PYCARD,JCHAIN,IGKC,MYO1F,IGLC1,XAF1,SLAMF7,CTSL,MARCO,CTSS,MX2,CYBB,SLAMF8,LGMN,NAIP,RIPK2,GB…
GO: Biological Process	GO:0016477	cell migration			2.945e-43	1.847e-39	4.992e-41	4.653e-40	140	1757	PDGFRA,CD300A,CORO1C,SERPINF1,ACTA2,CLEC7A,HMOX1,ADGRE2,ADA,TWIST1,CCR2,S100A8,ADORA2B,S100A9,S100A12,ADORA3,FAP,FBLN1,FCER1G,PIK3CG,CXCL9,HRH1,AIF1,CCL2,FGF7,CCR1,CCL4,CCL5,CCL7,CCR5,BIN2,CCL8,CCL11,MMP1,GPNMB,MMP2,CCL18,CCL20,FGR,MERTK,MMP9,MMP12,VAV1,COL1A1,COL1A2,COL3A1,MPP1,SELL,COL5A1,FN1,ANXA1,FOLR2,ICAM1,RGCC,DOCK10,APOE,PPARG,PPBP,FAS,RND3,POSTN,ARHGDIB,IGF1,CCN1,PYCARD,VCAN,JCHAIN,IGKC,…
GO: Biological Process	GO:0002446	neutrophil mediated immunity			4.637e-43	2.909e-39	7.654e-41	7.135e-40	78	506	ATP8B4,MAN2B1,LILRB2,CLEC5A,CD300A,TCIRG1,CHI3L1,CHIT1,PLAC8,FABP5,S100A8,S100A9,TYROBP,S100A11,S100A12,FCER1G,FCGR2A,FCGR3B,FCN1,PLAUR,BIN2,FGR,MMP9,MNDA,HSPA6,ALOX5,SELL,FPR1,GMFG,PPBP,CR1,SLC2A3,PYCARD,RNASET2,MYO1F,CSTB,FUCA1,CTSD,CTSS,IL6,CTSZ,CXCR2,CYBB,PTAFR,ITGAM,HPSE,ITGAX,ADA2,ITGB2,CFD,PTPRC,GM2A,PYGL,C3,C3AR1,C5AR1,DOCK2,GLIPR1,CRISPLD2,RAB31,RAP2B,LAIR1,GRN,OLR1,LGALS3,RNASE2,CD14,TI…
GO: Biological Process	GO:0001816	cytokine production			1.246e-42	7.817e-39	2.004e-40	1.868e-39	99	875	ABCA1,EREG,CEBPB,HLA-DPA1,HLA-DPB1,LILRB2,CLEC5A,ACP5,VSIG4,CLEC7A,TCIRG1,TLR7,HMOX1,LY96,CHI3L1,ADCY7,FABP4,TWIST1,CCR2,S100A8,ADORA2B,S100A9,TYROBP,S100A12,FBLN1,CLC,FCER1G,FCGR2B,FCN1,PIK3CG,AIF1,CCL2,CCL5,GPNMB,CCL20,FGR,MERTK,MMP12,AIM2,MNDA,FN1,ANXA1,RGCC,IRF8,PPARG,POSTN,RSAD2,IGF1,SRGN,PYCARD,IL1RN,IL6,CYBB,IL10,INHBA,RIPK2,GATA6,PTPN22,PTAFR,HPSE,LILRB1,PTGS2,ITK,NOD2,CD84,CCN4,PTPRC,CLE…
GO: Biological Process	GO:0043312	neutrophil degranulation			2.909e-42	1.825e-38	4.561e-40	4.252e-39	76	488	ATP8B4,MAN2B1,LILRB2,CLEC5A,CD300A,TCIRG1,CHI3L1,CHIT1,PLAC8,FABP5,S100A8,S100A9,TYROBP,S100A11,S100A12,FCER1G,FCGR2A,FCGR3B,FCN1,PLAUR,BIN2,FGR,MMP9,MNDA,HSPA6,ALOX5,SELL,FPR1,GMFG,PPBP,CR1,SLC2A3,PYCARD,RNASET2,MYO1F,CSTB,FUCA1,CTSD,CTSS,CTSZ,CXCR2,CYBB,PTAFR,ITGAM,HPSE,ITGAX,ADA2,ITGB2,CFD,PTPRC,GM2A,PYGL,C3,C3AR1,C5AR1,DOCK2,GLIPR1,CRISPLD2,RAB31,RAP2B,LAIR1,GRN,OLR1,LGALS3,RNASE2,CD14,TIMP2,…
GO: Biological Process	GO:0002283	neutrophil activation involved in immune response			4.559e-42	2.86e-38	6.974e-40	6.501e-39	76	491	ATP8B4,MAN2B1,LILRB2,CLEC5A,CD300A,TCIRG1,CHI3L1,CHIT1,PLAC8,FABP5,S100A8,S100A9,TYROBP,S100A11,S100A12,FCER1G,FCGR2A,FCGR3B,FCN1,PLAUR,BIN2,FGR,MMP9,MNDA,HSPA6,ALOX5,SELL,FPR1,GMFG,PPBP,CR1,SLC2A3,PYCARD,RNASET2,MYO1F,CSTB,FUCA1,CTSD,CTSS,CTSZ,CXCR2,CYBB,PTAFR,ITGAM,HPSE,ITGAX,ADA2,ITGB2,CFD,PTPRC,GM2A,PYGL,C3,C3AR1,C5AR1,DOCK2,GLIPR1,CRISPLD2,RAB31,RAP2B,LAIR1,GRN,OLR1,LGALS3,RNASE2,CD14,TIMP2,…
GO: Biological Process	GO:0022610	biological adhesion			7.854e-42	4.926e-38	1.173e-39	1.093e-38	128	1516	CEBPB,HLA-DMA,PDGFRA,HLA-DPA1,HLA-DPB1,LILRB2,CD300A,CORO1C,VSIG4,ACTN1,ADGRE2,ADA,CCR2,S100A8,S100A9,S100A11,FAP,MFAP4,FBLN1,FBN1,FCGR2B,PIK3CG,SPON1,LPXN,AIF1,CCL2,COL14A1,CCR1,CCL4,CCL5,CCL11,SRPX,GPNMB,MMP2,MERTK,PLEK,MMP12,VAV1,COL1A1,COL3A1,THEMIS2,SELL,COL5A1,COL6A3,COL8A1,COL8A2,COL15A1,VWF,COL16A1,COMP,FN1,ANXA1,FOLR2,MAP3K8,ICAM1,RGCC,CYTIP,MMRN1,RND3,POSTN,ARHGDIB,IGF1,CCN1,PYCARD,VCAN…
GO: Biological Process	GO:0007155	cell adhesion			2.535e-41	1.59e-37	3.697e-39	3.446e-38	127	1509	CEBPB,HLA-DMA,PDGFRA,HLA-DPA1,HLA-DPB1,LILRB2,CD300A,CORO1C,VSIG4,ACTN1,ADGRE2,ADA,CCR2,S100A8,S100A9,S100A11,FAP,MFAP4,FBLN1,FBN1,FCGR2B,PIK3CG,SPON1,LPXN,AIF1,CCL2,COL14A1,CCR1,CCL4,CCL5,CCL11,SRPX,GPNMB,MMP2,MERTK,PLEK,MMP12,VAV1,COL1A1,COL3A1,THEMIS2,SELL,COL5A1,COL6A3,COL8A1,COL8A2,COL15A1,VWF,COL16A1,COMP,FN1,ANXA1,FOLR2,MAP3K8,ICAM1,RGCC,CYTIP,MMRN1,RND3,POSTN,ARHGDIB,IGF1,CCN1,PYCARD,VCAN…
GO: Biological Process	GO:0050865	regulation of cell activation			4.839e-41	3.035e-37	6.898e-39	6.43e-38	87	689	CEBPB,HLA-DMA,PDGFRA,HLA-DPA1,HLA-DPB1,LILRB2,CD300A,ACTA2,VSIG4,CLEC7A,HMOX1,ADGRE2,ADA,CCR2,ADORA2B,TYROBP,CLC,FCER1G,FCGR2B,AHR,AIF1,CCL2,CCL5,GPNMB,CCL20,FGR,MERTK,PLEK,MNDA,VAV1,ANXA1,MAP3K8,APOE,PPARG,CR1,FAS,MILR1,IGF1,PYCARD,IGKC,IGLC1,SLAMF7,IL6,IL7R,SLAMF8,IL10,INHBA,RIPK2,PTPN22,PTAFR,SAMSN1,ITGAM,ITGB2,LILRB1,NOD2,CD84,PTPRC,PTPRE,BTK,IL33,RAC2,LILRB4,LST1,SH2B3,GRN,GPR183,EMILIN1,LEP…
GO: Biological Process	GO:0048870	cell motility			7.372e-40	4.624e-36	1.005e-37	9.369e-37	142	1932	EREG,PDGFRA,CD300A,CORO1C,SERPINF1,ACTA2,CLEC7A,HMOX1,ADGRE2,ADA,TWIST1,CCR2,S100A8,ADORA2B,S100A9,S100A12,ADORA3,FAP,FBLN1,FCER1G,PIK3CG,CXCL9,HRH1,AIF1,CCL2,FGF7,CCR1,CCL4,CCL5,CCL7,CCR5,BIN2,CCL8,CCL11,MMP1,GPNMB,MMP2,CCL18,CCL20,FGR,MERTK,MMP9,MMP12,PLTP,VAV1,COL1A1,COL1A2,COL3A1,MPP1,SELL,COL5A1,FN1,ANXA1,FOLR2,ICAM1,RGCC,DOCK10,APOE,PPARG,PPBP,FAS,RND3,POSTN,ARHGDIB,IGF1,CCN1,PYCARD,VCAN,JC…
GO: Biological Process	GO:0051674	localization of cell			7.372e-40	4.624e-36	1.005e-37	9.369e-37	142	1932	EREG,PDGFRA,CD300A,CORO1C,SERPINF1,ACTA2,CLEC7A,HMOX1,ADGRE2,ADA,TWIST1,CCR2,S100A8,ADORA2B,S100A9,S100A12,ADORA3,FAP,FBLN1,FCER1G,PIK3CG,CXCL9,HRH1,AIF1,CCL2,FGF7,CCR1,CCL4,CCL5,CCL7,CCR5,BIN2,CCL8,CCL11,MMP1,GPNMB,MMP2,CCL18,CCL20,FGR,MERTK,MMP9,MMP12,PLTP,VAV1,COL1A1,COL1A2,COL3A1,MPP1,SELL,COL5A1,FN1,ANXA1,FOLR2,ICAM1,RGCC,DOCK10,APOE,PPARG,PPBP,FAS,RND3,POSTN,ARHGDIB,IGF1,CCN1,PYCARD,VCAN,JC…
GO: Biological Process	GO:0034097	response to cytokine			3.89e-38	2.44e-34	5.191e-36	4.838e-35	113	1287	EREG,CEBPB,HLA-DPA1,HLA-DPB1,HLA-DQB1,HLA-DRA,ACP5,HLA-DRB4,TCIRG1,HMOX1,CHI3L1,FABP4,TWIST1,CCR2,FCER1G,FCGR1B,CXCL9,AIF1,CCL2,CCR1,CCL4,CCL5,CCL7,CCR5,CCL8,CCL11,MMP1,MMP2,CCL18,CCL20,MMP9,MMP12,AIM2,MNDA,ALOX5,VAV1,COL1A1,COL1A2,COL3A1,MRC1,FN1,ANXA1,MAP3K8,FPR1,ICAM1,IRF8,SAMHD1,PPARG,PPBP,FAS,POSTN,RSAD2,CSF2RA,CSF2RB,PYCARD,LAMP3,XAF1,IL1RN,IL6,IL7R,CXCL8,MX2,CXCR2,IL10,IL10RA,RIPK2,GBP2,IT…
GO: Biological Process	GO:0002694	regulation of leukocyte activation			2.203e-37	1.382e-33	2.879e-35	2.683e-34	80	639	CEBPB,HLA-DMA,HLA-DPA1,HLA-DPB1,LILRB2,CD300A,VSIG4,CLEC7A,HMOX1,ADGRE2,ADA,CCR2,ADORA2B,TYROBP,CLC,FCER1G,FCGR2B,AHR,AIF1,CCL2,CCL5,GPNMB,CCL20,FGR,MERTK,MNDA,VAV1,ANXA1,MAP3K8,PPARG,CR1,FAS,MILR1,IGF1,PYCARD,IGKC,IGLC1,SLAMF7,IL6,IL7R,SLAMF8,IL10,INHBA,RIPK2,PTPN22,PTAFR,SAMSN1,ITGAM,ITGB2,LILRB1,NOD2,CD84,PTPRC,PTPRE,BTK,IL33,RAC2,LILRB4,LST1,GRN,GPR183,LEP,LGALS1,NLRP3,LGALS3,CORO1A,THBS1,EGR…
GO: Biological Process	GO:0030595	leukocyte chemotaxis			3.246e-37	2.036e-33	4.155e-35	3.873e-34	53	243	ADGRE2,CCR2,S100A8,S100A9,S100A12,FCER1G,PIK3CG,CXCL9,HRH1,AIF1,CCL2,CCR1,CCL4,CCL5,CCL7,CCR5,CCL8,CCL11,CCL18,CCL20,VAV1,MPP1,SELL,ANXA1,FOLR2,PPBP,IL1RN,IL6,CXCL8,CXCR2,SLAMF8,IL10,LGMN,ITGAM,ITGB2,NOD2,SCG2,C3AR1,C5AR1,RAC2,PLA2G7,GPR183,CXCL2,CXCL3,EDNRA,LGALS3,CORO1A,THBS1,SERPINE1,TREM1,GREM1,LYN,NCKAP1L
GO: Biological Process	GO:0071345	cellular response to cytokine stimulus			5.631e-37	3.532e-33	7.063e-35	6.584e-34	107	1188	EREG,CEBPB,HLA-DPA1,HLA-DPB1,HLA-DQB1,HLA-DRA,HLA-DRB4,TCIRG1,HMOX1,CHI3L1,FABP4,TWIST1,CCR2,FCER1G,FCGR1B,CXCL9,AIF1,CCL2,CCR1,CCL4,CCL5,CCL7,CCR5,CCL8,CCL11,MMP1,MMP2,CCL18,CCL20,MMP9,MMP12,AIM2,MNDA,ALOX5,VAV1,COL1A1,COL1A2,MRC1,FN1,ANXA1,MAP3K8,FPR1,ICAM1,IRF8,SAMHD1,PPARG,PPBP,FAS,POSTN,RSAD2,CSF2RA,CSF2RB,PYCARD,XAF1,IL1RN,IL6,IL7R,CXCL8,MX2,CXCR2,IL10,IL10RA,RIPK2,GBP2,ITGA4,PTAFR,ITGAM,IT…
GO: Biological Process	GO:0097529	myeloid leukocyte migration			7.359e-37	4.616e-33	9.05e-35	8.436e-34	52	235	CD300A,ADGRE2,CCR2,S100A8,S100A9,S100A12,FCER1G,PIK3CG,CXCL9,HRH1,AIF1,CCL2,CCR1,CCL4,CCL5,CCL7,CCL8,CCL11,CCL18,CCL20,VAV1,MPP1,SELL,ANXA1,FOLR2,PPBP,IL1RN,IL6,CXCL8,CXCR2,SLAMF8,LGMN,ITGAM,ITGB2,NOD2,SCG2,C3AR1,C5AR1,RAC2,PLA2G7,CXCL2,CXCL3,EMILIN1,EDNRA,LGALS3,THBS1,SERPINE1,TREM2,TREM1,GREM1,LYN,NCKAP1L
GO: Biological Process	GO:0031347	regulation of defense response			1.208e-36	7.574e-33	1.456e-34	1.358e-33	91	861	EREG,CEBPB,CD300A,ACP5,SERPINF1,VSIG4,CLEC7A,TLR7,LY96,ADA,ADCY7,FABP4,CCR2,S100A8,ADORA2B,S100A9,COLEC12,S100A12,FCER1G,FCGR2B,FCN1,PIK3CG,MICB,CCL5,MMP2,CCL18,FGR,CLEC10A,MMP9,MMP12,AIM2,MNDA,ALOX5AP,VAV1,ANXA1,AOAH,SAMHD1,APOE,PPARG,CR1,RSAD2,IGF1,PYCARD,MYO1F,CTSL,MARCO,CTSS,IL6,SLAMF8,IL10,LGMN,RIPK2,PTPN22,PTAFR,ITGAM,ITGB2,LILRB1,PTGIS,PTGS2,NOD2,CCN4,PTPRC,CLEC4A,BTK,C3,IL33,PLA2G7,GRN,NU…
GO: Biological Process	GO:0001817	regulation of cytokine production			2.128e-36	1.335e-32	2.519e-34	2.348e-33	87	789	EREG,CEBPB,HLA-DPA1,HLA-DPB1,LILRB2,CLEC5A,ACP5,VSIG4,CLEC7A,TLR7,HMOX1,LY96,ADCY7,TWIST1,CCR2,ADORA2B,TYROBP,FBLN1,CLC,FCER1G,FCGR2B,FCN1,AIF1,CCL2,CCL5,GPNMB,CCL20,FGR,MERTK,MMP12,AIM2,MNDA,FN1,ANXA1,RGCC,IRF8,PPARG,POSTN,RSAD2,IGF1,SRGN,PYCARD,IL1RN,IL6,CYBB,IL10,INHBA,RIPK2,GATA6,PTPN22,PTAFR,HPSE,LILRB1,PTGS2,NOD2,CD84,CCN4,PTPRC,CLEC4A,SULF1,BTK,NAV3,C3,C3AR1,C5AR1,IL33,CASP1,LEP,NLRP3,THBS…
GO: Biological Process	GO:0060326	cell chemotaxis			2.203e-36	1.381e-32	2.558e-34	2.385e-33	59	328	PDGFRA,ADGRE2,CCR2,S100A8,S100A9,S100A12,FCER1G,PIK3CG,CXCL9,HRH1,AIF1,CCL2,CCR1,CCL4,CCL5,CCL7,CCR5,BIN2,CCL8,CCL11,CCL18,CCL20,VAV1,MPP1,SELL,ANXA1,FOLR2,PPBP,IL1RN,IL6,CXCL8,CXCR2,SLAMF8,IL10,LGMN,ITGAM,ITGB2,NOD2,ACKR3,SCG2,C3AR1,C5AR1,RAC2,PLA2G7,CCRL2,GPR183,CXCL2,CXCL3,EDNRA,LGALS3,CORO1A,THBS1,EGR3,LOX,SERPINE1,TREM1,GREM1,LYN,NCKAP1L
GO: Biological Process	GO:0032103	positive regulation of response to external stimulus			7.621e-36	4.78e-32	8.691e-34	8.101e-33	81	689	EREG,CEBPB,CD300A,CLEC7A,TLR7,LY96,FABP4,CCR2,S100A8,ADORA2B,S100A9,COLEC12,S100A12,FCER1G,FCN1,PIK3CG,MICB,AIF1,CCL2,CCR1,CCL4,CCL5,CCL7,MMP2,CCL18,CLEC10A,MMP12,AIM2,LY86,MNDA,ALOX5AP,VAV1,SELL,FN1,RSAD2,PYCARD,CTSL,MARCO,CTSS,IL6,CXCL8,CXCR2,LGMN,RIPK2,PTPN22,PTAFR,ITGAM,ITGB2,PTGS2,NOD2,CCN4,CLEC4A,SCG2,BTK,C3,C3AR1,C5AR1,IL33,RAC2,PLA2G7,GRN,NUPR1,EDNRA,THBD,THBS1,CD14,CD28,CD86,CD36,TLR1,TL…
GO: Biological Process	GO:0050778	positive regulation of immune response			3.194e-35	2.003e-31	3.577e-33	3.335e-32	93	938	CFH,EREG,HLA-DMA,HLA-DPA1,HLA-DPB1,HLA-DQB1,CD300A,HLA-DRA,HLA-DRB4,VSIG4,CLEC7A,TLR7,LY96,ADA,CCR2,S100A8,ADORA2B,S100A9,COLEC12,FCER1G,FCGR2A,FCGR2B,FCN1,MICB,LPXN,CCL5,MMP2,FGR,CLEC10A,MMP12,AIM2,MNDA,VAV1,THEMIS2,LAT2,ANXA1,FPR1,FPR3,RGCC,CR1,RSAD2,PYCARD,IGKC,IGLC1,FYB1,CTSL,MARCO,CTSS,IL6,IL10,LGMN,RIPK2,PTPN22,PTAFR,ITGAM,ITGB2,LILRB1,ITK,NOD2,CFD,PTPRC,TRAT1,CLEC4A,BTK,C1QA,C1QB,C1R,C1S,C…
GO: Biological Process	GO:0043062	extracellular structure organization			1.979e-33	1.242e-29	2.178e-31	2.03e-30	68	510	ABCA1,PDGFRA,HMOX1,FAP,MFAP4,FBLN1,FBN1,COL14A1,MMP1,MMP2,MMP9,MMP12,PLTP,COL1A1,COL1A2,COL3A1,COL5A1,COL5A2,COL6A3,COL8A1,COL8A2,COL10A1,COL15A1,VWF,COL16A1,COMP,FN1,OLFML2B,ICAM1,RGCC,APOC1,APOE,MSR1,POSTN,ABCG1,CCN1,VCAN,CTSL,CTSS,IL6,SOAT1,ITGA4,DCN,ITGAM,ITGAX,ITGB2,SULF1,NPC1,CRISPLD2,PLA2G7,CAPG,LCP1,ADAM12,EMILIN1,LGALS3,TGFBI,MFAP5,THBS1,LIPA,TIMP1,TIMP2,LOX,CD36,SERPINE1,CD44,GREM1,LUM,…
GO: Biological Process	GO:0009617	response to bacterium			2.563e-33	1.608e-29	2.772e-31	2.584e-30	82	766	ABCA1,CD52,CEBPB,LILRB2,ACP5,LY96,CHIT1,PLAC8,FABP4,S100A8,S100A9,S100A12,FCER1G,FCGR2B,CXCL9,CCL2,CCL5,CCR5,CCL20,FGR,LY86,MRC1,TENT5A,ICAM1,IRF8,PPBP,CSF2RB,PYCARD,JCHAIN,IGKC,MYO1F,IGLC1,IL1RN,IL6,CXCL8,SLAMF8,IL10,IL10RA,RIPK2,GBP2,PTPN22,NCF2,PTAFR,DCN,LILRB1,PTGS2,NOD2,CD84,CFD,PYGL,C3,C5AR1,TMEM255A,CASP1,OAS2,GRN,CXCL2,CXCL3,RGS1,EDNRA,NLRP3,THBD,RNASE1,RNASE2,RNASE6,CD14,CD86,CD36,TLR1,T…
GO: Biological Process	GO:0030334	regulation of cell migration			1.036e-32	6.499e-29	1.101e-30	1.027e-29	95	1052	PDGFRA,CD300A,CORO1C,SERPINF1,ACTA2,CLEC7A,HMOX1,ADA,CCR2,ADORA2B,ADORA3,FBLN1,AIF1,CCL2,FGF7,CCR1,CCL4,CCL5,CCL7,CCL8,CCL11,GPNMB,MMP2,CCL20,FGR,MMP9,MMP12,COL1A1,COL3A1,MPP1,SELL,FN1,ANXA1,ICAM1,RGCC,DOCK10,APOE,PPARG,FAS,RND3,POSTN,ARHGDIB,IGF1,CCN1,PYCARD,MYO1F,SDC3,IL1RN,IL6,CXCL8,LRRC15,CXCR2,PHACTR1,SLAMF8,LGMN,MYO5A,PTPN22,ITGA4,PTAFR,DCN,ITGAX,PTGS2,NRP2,NOD2,CCN4,SRPX2,PTPRC,SULF1,ACKR3…
GO: Biological Process	GO:2000145	regulation of cell motility			5.94e-32	3.725e-28	6.209e-30	5.787e-29	97	1120	EREG,PDGFRA,CD300A,CORO1C,SERPINF1,ACTA2,CLEC7A,HMOX1,ADA,TWIST1,CCR2,ADORA2B,ADORA3,FBLN1,AIF1,CCL2,FGF7,CCR1,CCL4,CCL5,CCL7,CCL8,CCL11,GPNMB,MMP2,CCL20,FGR,MMP9,MMP12,COL1A1,COL3A1,MPP1,SELL,FN1,ANXA1,ICAM1,RGCC,DOCK10,APOE,PPARG,FAS,RND3,POSTN,ARHGDIB,IGF1,CCN1,PYCARD,MYO1F,SDC3,IL1RN,IL6,CXCL8,LRRC15,CXCR2,PHACTR1,SLAMF8,LGMN,MYO5A,PTPN22,ITGA4,PTAFR,DCN,ITGAX,PTGS2,NRP2,NOD2,CCN4,SRPX2,PTPRC…
GO: Biological Process	GO:0002253	activation of immune response			1.658e-31	1.04e-27	1.705e-29	1.589e-28	79	752	CFH,HLA-DPA1,HLA-DPB1,HLA-DQB1,CD300A,HLA-DRA,HLA-DRB4,VSIG4,CLEC7A,TLR7,LY96,ADA,S100A8,S100A9,COLEC12,FCER1G,FCGR2A,FCGR2B,FCN1,MICB,LPXN,FGR,CLEC10A,AIM2,MNDA,VAV1,THEMIS2,LAT2,FPR1,FPR3,RGCC,CR1,RSAD2,PYCARD,IGKC,IGLC1,FYB1,CTSL,MARCO,CTSS,IL10,LGMN,RIPK2,PTPN22,PTAFR,ITGAM,ITGB2,ITK,NOD2,CFD,PTPRC,TRAT1,CLEC4A,BTK,C1QA,C1QB,C1R,C1S,C3,C3AR1,C5AR1,LILRB4,LCP2,ARPC1B,LGALS3,CD14,CD28,CD86,CD36…
GO: Biological Process	GO:0019221	cytokine-mediated signaling pathway			2.003e-31	1.256e-27	2.026e-29	1.889e-28	82	814	EREG,HLA-DPA1,HLA-DPB1,HLA-DQB1,HLA-DRA,HLA-DRB4,HMOX1,TWIST1,CCR2,FCER1G,FCGR1B,CXCL9,CCL2,CCR1,CCL4,CCL5,CCL7,CCR5,CCL8,CCL11,MMP1,MMP2,CCL18,CCL20,MMP9,MMP12,AIM2,ALOX5,VAV1,COL1A2,FN1,ANXA1,MAP3K8,FPR1,ICAM1,IRF8,SAMHD1,PPARG,PPBP,FAS,RSAD2,CSF2RA,CSF2RB,PYCARD,XAF1,IL1RN,IL6,IL7R,CXCL8,MX2,CXCR2,IL10,IL10RA,RIPK2,GBP2,PTAFR,ITGAM,ITGAX,ITGB2,PTGS2,NOD2,PTPRC,ACKR3,IL33,SH2B3,CASP1,CCRL2,OAS2…
GO: Biological Process	GO:0046649	lymphocyte activation			2.838e-31	1.78e-27	2.825e-29	2.633e-28	82	818	CEBPB,HLA-DMA,HLA-DPA1,HLA-DPB1,LILRB2,CD300A,VSIG4,CLEC7A,TCIRG1,ADA,CCR2,TYROBP,CLC,FCER1G,FCGR2B,PIK3CG,MICB,AHR,AIF1,CCL2,CCL5,GPNMB,CCL20,MERTK,MNDA,VAV1,LAT2,ANXA1,MAP3K8,ICAM1,DOCK10,CR1,FAS,RSAD2,IGF1,PYCARD,IGKC,IGLC1,SLAMF7,IL6,IL7R,SLAMF8,IL10,INHBA,RIPK2,PTPN22,ITGA4,SAMSN1,ITGAM,ITGAX,ITGB2,LILRB1,ITK,NOD2,PTPRC,CLEC4A,BTK,RAC2,LILRB4,DOCK2,LST1,GPR183,LCP1,LEP,LGALS1,NLRP3,LGALS3,CO…
GO: Biological Process	GO:0071621	granulocyte chemotaxis			5.543e-31	3.477e-27	5.432e-29	5.063e-28	38	138	ADGRE2,S100A8,S100A9,S100A12,FCER1G,PIK3CG,CXCL9,HRH1,CCL2,CCL4,CCL5,CCL7,CCL8,CCL11,CCL18,CCL20,VAV1,MPP1,SELL,ANXA1,PPBP,IL1RN,CXCL8,CXCR2,ITGAM,ITGB2,NOD2,SCG2,C3AR1,C5AR1,RAC2,CXCL2,CXCL3,EDNRA,LGALS3,THBS1,TREM1,NCKAP1L
GO: Biological Process	GO:0097530	granulocyte migration			2.074e-30	1.301e-26	2.001e-28	1.865e-27	40	163	CD300A,ADGRE2,S100A8,S100A9,S100A12,FCER1G,PIK3CG,CXCL9,HRH1,CCL2,CCL4,CCL5,CCL7,CCL8,CCL11,CCL18,CCL20,VAV1,MPP1,SELL,ANXA1,PPBP,IL1RN,CXCL8,CXCR2,SLAMF8,ITGAM,ITGB2,NOD2,SCG2,C3AR1,C5AR1,RAC2,CXCL2,CXCL3,EDNRA,LGALS3,THBS1,TREM1,NCKAP1L
GO: Biological Process	GO:0051270	regulation of cellular component movement			2.323e-30	1.457e-26	2.208e-28	2.058e-27	99	1219	EREG,PDGFRA,CD300A,CORO1C,SERPINF1,ACTA2,CLEC7A,ACTN1,HMOX1,ADA,TWIST1,CCR2,ADORA2B,ADORA3,FBLN1,AIF1,CCL2,FGF7,CCR1,CCL4,CCL5,CCL7,CCL8,CCL11,GPNMB,MMP2,CCL20,FGR,MMP9,MMP12,PLN,COL1A1,COL3A1,MPP1,SELL,FN1,ANXA1,ICAM1,RGCC,DOCK10,APOE,PPARG,FAS,RND3,POSTN,ARHGDIB,IGF1,CCN1,PYCARD,MYO1F,SDC3,IL1RN,IL6,CXCL8,LRRC15,CXCR2,PHACTR1,SLAMF8,LGMN,MYO5A,PTPN22,ITGA4,PTAFR,DCN,ITGAX,PTGS2,NRP2,NOD2,CCN4,S…
GO: Biological Process	GO:0040012	regulation of locomotion			3.813e-30	2.392e-26	3.57e-28	3.327e-27	98	1203	EREG,PDGFRA,CD300A,CORO1C,SERPINF1,ACTA2,CLEC7A,HMOX1,ADA,TWIST1,CCR2,ADORA2B,ADORA3,FBLN1,AIF1,CCL2,FGF7,CCR1,CCL4,CCL5,CCL7,CCL8,CCL11,GPNMB,MMP2,CCL20,FGR,MMP9,MMP12,COL1A1,COL3A1,MPP1,SELL,FN1,ANXA1,ICAM1,RGCC,DOCK10,APOE,PPARG,FAS,RND3,POSTN,ARHGDIB,IGF1,CCN1,PYCARD,MYO1F,SDC3,IL1RN,IL6,CXCL8,LRRC15,CXCR2,PHACTR1,SLAMF8,LGMN,MYO5A,PTPN22,ITGA4,PTAFR,DCN,ITGAX,PTGS2,NRP2,NOD2,CCN4,SRPX2,PTPRC…
GO: Biological Process	GO:0001819	positive regulation of cytokine production			3.744e-29	2.348e-25	3.454e-27	3.219e-26	63	508	EREG,CEBPB,HLA-DPA1,HLA-DPB1,LILRB2,CLEC5A,CLEC7A,TLR7,HMOX1,LY96,TWIST1,CCR2,ADORA2B,TYROBP,FCER1G,FCN1,AIF1,CCL2,CCL5,CCL20,FGR,MMP12,AIM2,MNDA,ANXA1,RGCC,IRF8,POSTN,RSAD2,PYCARD,IL1RN,IL6,CYBB,IL10,RIPK2,PTPN22,PTAFR,HPSE,LILRB1,PTGS2,NOD2,CD84,PTPRC,SULF1,C3,C3AR1,C5AR1,IL33,CASP1,LEP,NLRP3,THBS1,CD14,CD28,CD86,CD36,TLR1,TLR2,TLR4,CRTAM,SERPINE1,TREM2,LUM
GO: Biological Process	GO:0006935	chemotaxis			5.309e-29	3.33e-25	4.826e-27	4.498e-26	73	697	PDGFRA,ADGRE2,CCR2,S100A8,S100A9,S100A12,FCER1G,PIK3CG,CXCL9,HRH1,AIF1,CCL2,FGF7,CCR1,CCL4,CCL5,PLAUR,CCL7,CCR5,BIN2,CCL8,CCL11,GPNMB,CCL18,CCL20,VAV1,MPP1,SELL,FN1,ANXA1,FOLR2,FPR1,FPR3,PPBP,CCN1,IL1RN,IL6,CXCL8,CXCR2,SLAMF8,IL10,LGMN,PTAFR,ITGAM,ITGB2,NRP2,NOD2,ACKR3,SCG2,C3AR1,C5AR1,RAC2,DOCK2,PLA2G7,CCRL2,GPR183,CXCL2,CXCL3,EDNRA,LGALS3,CORO1A,THBS1,RNASE2,EGR2,EGR3,PLXNC1,LOX,SERPINE1,TREM2,…
GO: Biological Process	GO:0070661	leukocyte proliferation			5.39e-29	3.381e-25	4.83e-27	4.502e-26	53	348	CEBPB,HLA-DPA1,HLA-DPB1,LILRB2,CD300A,VSIG4,TCIRG1,ADA,CCR2,TYROBP,CLC,FCGR2B,PIK3CG,AHR,AIF1,CCL5,CCL8,GPNMB,MNDA,ANXA1,IGF1,PYCARD,IL6,IL7R,IL10,RIPK2,PTPN22,ITGAM,ITGAX,ITGB2,LILRB1,PTPRC,BTK,IL33,RAC2,DOCK2,LST1,GPR183,LEP,LGALS3,CORO1A,CD28,CD86,CD38,TLR4,CRTAM,CD44,TREM2,TNFAIP3,GREM1,TNFRSF1B,LYN,NCKAP1L
GO: Biological Process	GO:0042330	taxis			6.98e-29	4.378e-25	6.166e-27	5.747e-26	73	700	PDGFRA,ADGRE2,CCR2,S100A8,S100A9,S100A12,FCER1G,PIK3CG,CXCL9,HRH1,AIF1,CCL2,FGF7,CCR1,CCL4,CCL5,PLAUR,CCL7,CCR5,BIN2,CCL8,CCL11,GPNMB,CCL18,CCL20,VAV1,MPP1,SELL,FN1,ANXA1,FOLR2,FPR1,FPR3,PPBP,CCN1,IL1RN,IL6,CXCL8,CXCR2,SLAMF8,IL10,LGMN,PTAFR,ITGAM,ITGB2,NRP2,NOD2,ACKR3,SCG2,C3AR1,C5AR1,RAC2,DOCK2,PLA2G7,CCRL2,GPR183,CXCL2,CXCL3,EDNRA,LGALS3,CORO1A,THBS1,RNASE2,EGR2,EGR3,PLXNC1,LOX,SERPINE1,TREM2,…
GO: Biological Process	GO:0030198	extracellular matrix organization			9.933e-29	6.23e-25	8.653e-27	8.065e-26	56	399	PDGFRA,FAP,MFAP4,FBLN1,FBN1,COL14A1,MMP1,MMP2,MMP9,MMP12,COL1A1,COL1A2,COL3A1,COL5A1,COL5A2,COL6A3,COL8A1,COL8A2,COL10A1,COL15A1,VWF,COL16A1,COMP,FN1,OLFML2B,ICAM1,RGCC,POSTN,CCN1,VCAN,CTSL,CTSS,IL6,ITGA4,DCN,ITGAM,ITGAX,ITGB2,SULF1,CRISPLD2,CAPG,LCP1,ADAM12,EMILIN1,LGALS3,TGFBI,MFAP5,THBS1,TIMP1,TIMP2,LOX,SERPINE1,CD44,GREM1,LUM,TNFRSF1B
GO: Biological Process	GO:0050727	regulation of inflammatory response			1.115e-28	6.993e-25	9.58e-27	8.93e-26	57	416	CEBPB,ACP5,SERPINF1,CLEC7A,TLR7,ADA,ADCY7,FABP4,CCR2,S100A8,ADORA2B,S100A9,S100A12,FCER1G,FCGR2B,PIK3CG,CCL5,CCL18,MMP9,ALOX5AP,ANXA1,AOAH,APOE,PPARG,IGF1,PYCARD,CTSS,IL6,SLAMF8,IL10,PTGIS,PTGS2,NOD2,CCN4,PTPRC,BTK,C3,IL33,PLA2G7,GRN,NUPR1,LEP,EDNRA,NLRP3,CD28,TLR2,TLR4,SERPINE1,CD44,TREM2,DUSP10,TNFAIP3,TNFAIP6,OSMR,TNFRSF1B,LYN,HCK
GO: Biological Process	GO:0051249	regulation of lymphocyte activation			1.45e-28	9.093e-25	1.229e-26	1.145e-25	64	538	CEBPB,HLA-DMA,HLA-DPA1,HLA-DPB1,LILRB2,CD300A,VSIG4,CLEC7A,ADA,CCR2,TYROBP,CLC,FCGR2B,AHR,AIF1,CCL2,CCL5,GPNMB,CCL20,MERTK,MNDA,VAV1,ANXA1,MAP3K8,CR1,FAS,IGF1,PYCARD,IGKC,IGLC1,SLAMF7,IL6,IL7R,SLAMF8,IL10,INHBA,RIPK2,PTPN22,SAMSN1,LILRB1,NOD2,PTPRC,BTK,RAC2,LILRB4,LST1,GPR183,LEP,LGALS1,NLRP3,LGALS3,CORO1A,EGR3,CD28,CD86,CD38,TLR4,CD44,DUSP10,TNFAIP3,TNFRSF1B,TRBC1,LYN,NCKAP1L
GO: Biological Process	GO:0002697	regulation of immune effector process			1.521e-28	9.543e-25	1.272e-26	1.186e-25	62	503	CFH,CD300A,VSIG4,HMOX1,ADGRE2,CCR2,ADORA2B,CLC,FCER1G,FCGR2B,MICB,CCL2,CCL5,CCL20,FGR,MMP12,AIM2,VAV1,ANXA1,CR1,RSAD2,PYCARD,IGKC,IGLC1,IL6,IL7R,SLAMF8,IL10,RIPK2,PTPN22,PTAFR,ITGAM,ITGB2,LILRB1,NOD2,CD84,PTPRC,BTK,C1QA,C1QB,C1R,C1S,C3,C3AR1,C5AR1,IL33,RAC2,GRN,LEP,NLRP3,LGALS3,CD28,CD86,CD36,TLR2,TLR4,CRTAM,IRAK3,DUSP10,TNFAIP3,TNFRSF1B,LYN
GO: Biological Process	GO:0031349	positive regulation of defense response			6.345e-28	3.979e-24	5.236e-26	4.88e-25	64	552	EREG,CEBPB,CD300A,CLEC7A,TLR7,LY96,FABP4,CCR2,S100A8,ADORA2B,S100A9,COLEC12,S100A12,FCER1G,FCN1,PIK3CG,MICB,CCL5,MMP2,CCL18,CLEC10A,MMP12,AIM2,MNDA,ALOX5AP,VAV1,RSAD2,PYCARD,CTSL,MARCO,CTSS,IL6,LGMN,RIPK2,PTPN22,PTAFR,ITGAM,ITGB2,PTGS2,NOD2,CCN4,CLEC4A,BTK,C3,IL33,PLA2G7,GRN,NUPR1,EDNRA,CD14,CD28,CD86,CD36,TLR1,TLR2,TLR4,CRTAM,SERPINE1,TREM2,IRAK3,TNFAIP3,OSMR,LYN,HCK
GO: Biological Process	GO:0030593	neutrophil chemotaxis			7.922e-28	4.969e-24	6.453e-26	6.015e-25	33	114	S100A8,S100A9,S100A12,FCER1G,PIK3CG,CXCL9,CCL2,CCL4,CCL5,CCL7,CCL8,CCL11,CCL18,CCL20,VAV1,MPP1,SELL,PPBP,IL1RN,CXCL8,CXCR2,ITGAM,ITGB2,NOD2,C3AR1,C5AR1,RAC2,CXCL2,CXCL3,EDNRA,LGALS3,TREM1,NCKAP1L
GO: Biological Process	GO:0042110	T cell activation			8.835e-28	5.541e-24	7.03e-26	6.553e-25	63	537	CEBPB,HLA-DMA,HLA-DPA1,HLA-DPB1,LILRB2,CD300A,VSIG4,CLEC7A,TCIRG1,ADA,CCR2,CLC,FCER1G,FCGR2B,PIK3CG,MICB,AIF1,CCL2,CCL5,GPNMB,CCL20,VAV1,ANXA1,MAP3K8,ICAM1,CR1,FAS,RSAD2,IGF1,PYCARD,IL6,IL7R,IL10,RIPK2,PTPN22,ITGAM,ITGAX,ITGB2,LILRB1,ITK,NOD2,PTPRC,CLEC4A,RAC2,LILRB4,DOCK2,GPR183,LCP1,LEP,LGALS1,NLRP3,LGALS3,CORO1A,EGR3,CD28,CD86,CRTAM,CD44,CD48,DUSP10,TNFRSF1B,LYN,NCKAP1L
GO: Biological Process	GO:0080134	regulation of response to stress			8.855e-28	5.554e-24	7.03e-26	6.553e-25	113	1671	EREG,CEBPB,PDGFRA,CD300A,ACP5,SERPINF1,ACTA2,VSIG4,CLEC7A,TLR7,LY96,ADA,ADCY7,FABP4,TWIST1,CCR2,S100A8,ADORA2B,S100A9,COLEC12,S100A12,FAP,FCER1G,FCGR2B,FCN1,PIK3CG,MICB,CCL2,CCL5,PLAUR,MMP2,CCL18,FGR,PLEK,CLEC10A,MMP9,MMP12,AIM2,MNDA,ALOX5AP,VAV1,PRRX1,SFRP4,ANXA1,AOAH,BAG2,SAMHD1,APOE,PPARG,CR1,FAS,RSAD2,IGF1,PYCARD,MYO1F,IL1RN,CTSL,MARCO,CTSS,IL6,SLAMF8,IL10,LGMN,RASSF2,RIPK2,PTPN22,PTAFR,ITGAM…
GO: Biological Process	GO:0002237	response to molecule of bacterial origin			1.338e-27	8.392e-24	1.049e-25	9.777e-25	53	371	ABCA1,CEBPB,LILRB2,ACP5,LY96,S100A8,FCGR2B,CXCL9,CCL2,CCL5,CCR5,LY86,MRC1,ICAM1,IRF8,PPBP,CSF2RB,PYCARD,IL1RN,IL6,CXCL8,IL10,IL10RA,RIPK2,PTPN22,NCF2,PTAFR,DCN,LILRB1,PTGS2,NOD2,CD84,C5AR1,CASP1,CXCL2,CXCL3,EDNRA,NLRP3,THBD,CD14,CD86,CD36,TLR1,TLR2,TLR4,SERPINE1,TREM2,IRAK3,DUSP10,TNFAIP3,TNFRSF1B,LYN,HCK
GO: Biological Process	GO:0002250	adaptive immune response			1.553e-27	9.739e-24	1.202e-25	1.121e-24	72	715	HLA-DMA,HLA-DPA1,HLA-DPB1,HLA-DQB1,LILRB2,HLA-DRA,HLA-DRB4,TCIRG1,ADA,ADCY7,CCR2,CLC,FCER1G,FCGR1B,FCGR2B,PIK3CG,MICB,CCL20,CLEC10A,LAT2,ANXA1,ICAM1,CR1,FAS,RSAD2,PYCARD,JCHAIN,IGKC,LAMP3,IGLC1,SLAMF7,CTSL,CTSS,IL6,IL7R,IL10,RIPK2,SAMSN1,LILRB1,ITK,NOD2,CD84,PTPRC,TRAT1,ERAP2,CLEC4A,BTK,C1QA,C1QB,C1R,C1S,C3,C3AR1,LILRB5,IL33,LILRB4,LAIR1,GPR183,MCOLN1,NLRP3,CD28,CD86,GZMB,TLR4,CRTAM,CD44,CD48,DUS…
GO: Biological Process	GO:0030155	regulation of cell adhesion			1.659e-27	1.041e-23	1.269e-25	1.183e-24	75	777	CEBPB,HLA-DMA,HLA-DPA1,HLA-DPB1,LILRB2,CD300A,CORO1C,VSIG4,ADA,CCR2,FBLN1,FCGR2B,PIK3CG,LPXN,AIF1,CCL2,CCL5,GPNMB,MMP2,MMP12,VAV1,COL1A1,COL8A1,COL16A1,FN1,ANXA1,MAP3K8,ICAM1,RGCC,CYTIP,MMRN1,POSTN,ARHGDIB,IGF1,CCN1,PYCARD,MYO1F,IL1RN,IL6,IL7R,CXCL8,IL10,RIPK2,FXYD5,PTPN22,ITGA4,PTAFR,ITGB2,LILRB1,NOD2,PTPRC,ADAMDEC1,RAC2,LILRB4,SH2B3,EMILIN1,LEP,LGALS1,NLRP3,LGALS3,TGFBI,CORO1A,THBS1,EGR3,PLXNC1…
GO: Biological Process	GO:0002764	immune response-regulating signaling pathway			2.211e-27	1.387e-23	1.671e-25	1.557e-24	71	699	HLA-DPA1,HLA-DPB1,HLA-DQB1,LILRB2,CD300A,HLA-DRA,HLA-DRB4,CLEC7A,TLR7,LY96,ADA,S100A8,S100A9,COLEC12,FCER1G,FCGR1B,FCGR2A,FCGR2B,FCN1,MICB,LPXN,FGR,CLEC10A,MNDA,VAV1,THEMIS2,LAT2,FPR1,FPR3,CR1,RSAD2,IGKC,IGLC1,FYB1,CTSL,MARCO,CTSS,LGMN,RIPK2,PTPN22,PTAFR,ITGAM,ITGB2,LILRB1,ITK,NOD2,PTPRC,TRAT1,CLEC4A,BTK,C3AR1,C5AR1,LILRB4,LCP2,ARPC1B,LGALS3,CD14,CD28,CD86,CD33,CD36,CD38,TLR1,TLR2,TLR4,IRAK3,TNFA…
GO: Biological Process	GO:0002685	regulation of leukocyte migration			5.373e-27	3.37e-23	4.012e-25	3.74e-24	42	222	CD300A,HMOX1,ADA,CCR2,AIF1,CCL2,CCR1,CCL4,CCL5,CCL7,CCL8,CCL20,MMP9,MPP1,SELL,ANXA1,ICAM1,PYCARD,IL6,CXCL8,CXCR2,SLAMF8,LGMN,PTPN22,ITGA4,PTAFR,NOD2,C3AR1,C5AR1,IL33,RAC2,PLA2G7,EMILIN1,EDNRA,LGALS3,THBS1,TLR2,SERPINE1,TREM2,GREM1,LYN,NCKAP1L
GO: Biological Process	GO:0032496	response to lipopolysaccharide			1.22e-26	7.655e-23	9.005e-25	8.394e-24	51	356	ABCA1,CEBPB,LILRB2,ACP5,LY96,S100A8,CXCL9,CCL2,CCL5,CCR5,LY86,MRC1,ICAM1,IRF8,PPBP,CSF2RB,PYCARD,IL1RN,IL6,CXCL8,IL10,IL10RA,RIPK2,PTPN22,NCF2,PTAFR,DCN,LILRB1,PTGS2,NOD2,CD84,C5AR1,CASP1,CXCL2,CXCL3,EDNRA,NLRP3,THBD,CD14,CD86,CD36,TLR2,TLR4,SERPINE1,TREM2,IRAK3,DUSP10,TNFAIP3,TNFRSF1B,LYN,HCK
GO: Biological Process	GO:0071216	cellular response to biotic stimulus			1.426e-26	8.943e-23	1.04e-24	9.693e-24	44	254	ABCA1,CEBPB,LILRB2,CLEC7A,LY96,FCGR2B,CXCL9,CCL2,CCL5,CCR5,LY86,MRC1,ICAM1,IRF8,PPBP,PYCARD,IL1RN,IL6,CXCL8,IL10,RIPK2,PTPN22,PTAFR,LILRB1,NOD2,CD84,BTK,TIGAR,CASP1,CXCL2,CXCL3,NLRP3,CD14,CD86,CD36,TLR1,TLR2,TLR4,SERPINE1,TREM2,TNFAIP3,TNFRSF1B,LYN,HCK
GO: Biological Process	GO:1990266	neutrophil migration			2.088e-26	1.309e-22	1.505e-24	1.403e-23	34	135	S100A8,S100A9,S100A12,FCER1G,PIK3CG,CXCL9,CCL2,CCL4,CCL5,CCL7,CCL8,CCL11,CCL18,CCL20,VAV1,MPP1,SELL,PPBP,IL1RN,CXCL8,CXCR2,SLAMF8,ITGAM,ITGB2,NOD2,C3AR1,C5AR1,RAC2,CXCL2,CXCL3,EDNRA,LGALS3,TREM1,NCKAP1L
GO: Biological Process	GO:0002757	immune response-activating signal transduction			1.126e-25	7.064e-22	8e-24	7.457e-23	67	664	HLA-DPA1,HLA-DPB1,HLA-DQB1,CD300A,HLA-DRA,HLA-DRB4,CLEC7A,TLR7,LY96,ADA,S100A8,S100A9,COLEC12,FCER1G,FCGR2A,FCGR2B,FCN1,MICB,LPXN,FGR,CLEC10A,MNDA,VAV1,THEMIS2,LAT2,FPR1,FPR3,CR1,RSAD2,IGKC,IGLC1,FYB1,CTSL,MARCO,CTSS,LGMN,RIPK2,PTPN22,PTAFR,ITGAM,ITGB2,ITK,NOD2,PTPRC,TRAT1,CLEC4A,BTK,C3AR1,C5AR1,LILRB4,LCP2,ARPC1B,LGALS3,CD14,CD28,CD86,CD36,CD38,TLR1,TLR2,TLR4,IRAK3,TNFAIP3,TRBC1,LYN,HCK,NCKAP1L
GO: Biological Process	GO:0045088	regulation of innate immune response			1.135e-25	7.12e-22	8e-24	7.457e-23	57	475	EREG,CD300A,VSIG4,CLEC7A,TLR7,LY96,S100A8,S100A9,COLEC12,FCER1G,FCGR2B,FCN1,MICB,CCL5,MMP2,FGR,CLEC10A,MMP12,AIM2,MNDA,VAV1,SAMHD1,APOE,PPARG,CR1,RSAD2,PYCARD,MYO1F,CTSL,MARCO,CTSS,SLAMF8,LGMN,RIPK2,PTPN22,PTAFR,ITGAM,ITGB2,LILRB1,NOD2,CLEC4A,BTK,GRN,LEP,CD14,CD86,CD36,TLR1,TLR2,TLR4,CRTAM,TREM2,IRAK3,DUSP10,TNFAIP3,LYN,HCK
GO: Biological Process	GO:0071219	cellular response to molecule of bacterial origin			1.487e-25	9.329e-22	1.037e-23	9.662e-23	41	227	ABCA1,CEBPB,LILRB2,LY96,FCGR2B,CXCL9,CCL2,CCL5,CCR5,LY86,MRC1,ICAM1,IRF8,PPBP,PYCARD,IL1RN,IL6,CXCL8,IL10,RIPK2,PTPN22,PTAFR,LILRB1,NOD2,CD84,CASP1,CXCL2,CXCL3,NLRP3,CD14,CD86,CD36,TLR1,TLR2,TLR4,SERPINE1,TREM2,TNFAIP3,TNFRSF1B,LYN,HCK
GO: Biological Process	GO:0070663	regulation of leukocyte proliferation			1.697e-25	1.064e-21	1.169e-23	1.09e-22	43	255	CEBPB,HLA-DPA1,HLA-DPB1,LILRB2,CD300A,VSIG4,ADA,CCR2,TYROBP,CLC,FCGR2B,AHR,AIF1,CCL5,CCL8,GPNMB,MNDA,ANXA1,IGF1,PYCARD,IL6,IL10,RIPK2,PTPN22,LILRB1,PTPRC,BTK,RAC2,LST1,GPR183,LEP,LGALS3,CORO1A,CD28,CD86,CD38,TLR4,CD44,TNFAIP3,GREM1,TNFRSF1B,LYN,NCKAP1L
GO: Biological Process	GO:0046651	lymphocyte proliferation			3.799e-25	2.383e-21	2.59e-23	2.414e-22	47	319	CEBPB,HLA-DPA1,HLA-DPB1,LILRB2,CD300A,VSIG4,ADA,CCR2,TYROBP,CLC,FCGR2B,PIK3CG,AHR,AIF1,CCL5,GPNMB,MNDA,ANXA1,IGF1,PYCARD,IL6,IL7R,IL10,RIPK2,PTPN22,ITGAM,ITGAX,ITGB2,LILRB1,PTPRC,BTK,RAC2,DOCK2,LST1,GPR183,LEP,LGALS3,CORO1A,CD28,CD86,CD38,TLR4,CRTAM,CD44,TNFRSF1B,LYN,NCKAP1L
GO: Biological Process	GO:0032943	mononuclear cell proliferation			5.755e-25	3.609e-21	3.881e-23	3.618e-22	47	322	CEBPB,HLA-DPA1,HLA-DPB1,LILRB2,CD300A,VSIG4,ADA,CCR2,TYROBP,CLC,FCGR2B,PIK3CG,AHR,AIF1,CCL5,GPNMB,MNDA,ANXA1,IGF1,PYCARD,IL6,IL7R,IL10,RIPK2,PTPN22,ITGAM,ITGAX,ITGB2,LILRB1,PTPRC,BTK,RAC2,DOCK2,LST1,GPR183,LEP,LGALS3,CORO1A,CD28,CD86,CD38,TLR4,CRTAM,CD44,TNFRSF1B,LYN,NCKAP1L
GO: Biological Process	GO:0007159	leukocyte cell-cell adhesion			7.701e-25	4.83e-21	5.139e-23	4.79e-22	50	372	CEBPB,HLA-DMA,HLA-DPA1,HLA-DPB1,LILRB2,CD300A,VSIG4,ADA,CCR2,S100A8,S100A9,FCGR2B,AIF1,CCL2,CCL5,GPNMB,VAV1,SELL,ANXA1,MAP3K8,ICAM1,IGF1,PYCARD,IL6,IL7R,IL10,RIPK2,PTPN22,ITGA4,PTAFR,ITGAM,ITGB2,LILRB1,NOD2,PTPRC,RAC2,LILRB4,OLR1,LEP,LGALS1,NLRP3,LGALS3,CORO1A,EGR3,CD28,CD86,CD44,DUSP10,LYN,NCKAP1L
GO: Biological Process	GO:0009611	response to wounding			1.35e-24	8.467e-21	8.912e-23	8.307e-22	70	756	EREG,PDGFRA,ACTA2,CLEC7A,ACTN1,HMOX1,CCR2,S100A8,S100A9,TYROBP,ADORA3,FAP,FBLN1,FCER1G,PIK3CG,AIF1,CCL2,FGF7,CCR1,PLAUR,MAFF,MMP2,MERTK,PLEK,MMP12,VAV1,COL1A1,COL1A2,COL3A1,COL5A1,VWF,COMP,FN1,ANXA1,APOE,SLC1A3,MMRN1,POSTN,IGF1,CCN1,IL6,IL10,INHBA,GATA6,DCN,HPSE,CCN4,C3,NINJ2,GNA15,DPYSL3,RAP2B,SH2B3,GRN,LCP1,LCP2,PAPSS2,LGALS1,ZFPM2,THBD,THBS1,TIMP1,LOX,CD36,TLR4,SERPINE1,CD44,DUSP10,TNFAIP3,LYN
GO: Biological Process	GO:0002831	regulation of response to biotic stimulus			1.53e-24	9.598e-21	9.998e-23	9.319e-22	60	556	EREG,CD300A,VSIG4,CLEC7A,TLR7,LY96,S100A8,S100A9,COLEC12,FCER1G,FCGR2B,FCN1,MICB,CCL5,MMP2,FGR,CLEC10A,MMP12,AIM2,LY86,MNDA,VAV1,SAMHD1,APOE,PPARG,CR1,RSAD2,PYCARD,MYO1F,CTSL,MARCO,CTSS,SLAMF8,LGMN,RIPK2,PTPN22,PTAFR,ITGAM,ITGB2,LILRB1,NOD2,CD84,CLEC4A,BTK,TIGAR,GRN,LEP,CD14,CD86,CD36,TLR1,TLR2,TLR4,CRTAM,TREM2,IRAK3,DUSP10,TNFAIP3,LYN,HCK
GO: Biological Process	GO:0042127	regulation of cell population proliferation			2.732e-24	1.714e-20	1.767e-22	1.647e-21	116	1921	EREG,CEBPB,PDGFRA,HLA-DPA1,HLA-DPB1,LILRB2,CD300A,SERPINF1,VSIG4,CLEC7A,TCIRG1,HMOX1,ADA,PLAC8,FABP4,TWIST1,CCR2,ADORA2B,TYROBP,S100A11,ADORA3,FAP,FBLN1,CLC,FCGR2B,CXCL9,AHR,AIF1,CCL2,FGF7,CCL5,CCL8,CCL11,SRPX,GPNMB,MMP2,MMP9,MMP12,MNDA,CNN1,PRRX1,SFRP4,COMP,FN1,ANXA1,FOLR2,RGCC,APOE,PPARG,FAS,SLA,AREG,IGF1,CCN1,PYCARD,IL6,CTSZ,IL7R,CXCL8,CXCR2,IL10,LGMN,INHBA,RIPK2,GATA6,PTPN22,ITGA4,PTAFR,HPSE,…
GO: Biological Process	GO:0071222	cellular response to lipopolysaccharide			5.751e-24	3.607e-20	3.681e-22	3.431e-21	39	221	ABCA1,CEBPB,LILRB2,LY96,CXCL9,CCL2,CCL5,CCR5,LY86,MRC1,ICAM1,IRF8,PPBP,PYCARD,IL1RN,IL6,CXCL8,IL10,RIPK2,PTPN22,PTAFR,LILRB1,NOD2,CD84,CASP1,CXCL2,CXCL3,NLRP3,CD14,CD86,CD36,TLR2,TLR4,SERPINE1,TREM2,TNFAIP3,TNFRSF1B,LYN,HCK
GO: Biological Process	GO:0050867	positive regulation of cell activation			7.582e-24	4.755e-20	4.803e-22	4.477e-21	53	443	HLA-DMA,HLA-DPA1,HLA-DPB1,LILRB2,ACTA2,CLEC7A,ADA,CCR2,ADORA2B,TYROBP,FCER1G,AIF1,CCL2,CCL5,FGR,PLEK,VAV1,ANXA1,MAP3K8,IGF1,PYCARD,IGKC,IGLC1,IL6,IL7R,IL10,RIPK2,PTPN22,PTAFR,ITGAM,ITGB2,LILRB1,NOD2,PTPRC,BTK,IL33,LILRB4,GPR183,LEP,LGALS1,NLRP3,CORO1A,THBS1,EGR3,CD28,CD86,CD38,TLR4,TREM2,DUSP10,TRBC1,LYN,NCKAP1L
GO: Biological Process	GO:0043900	regulation of multi-organism process			9.321e-24	5.846e-20	5.846e-22	5.449e-21	72	825	EREG,CD300A,VSIG4,CLEC7A,TLR7,LY96,ADA,S100A8,S100A9,COLEC12,FBLN1,FCER1G,FCGR2B,FCN1,MICB,CCL4,CCL5,CCL8,MMP2,FGR,CLEC10A,MMP12,AIM2,LY86,MNDA,VAV1,SAMHD1,APOE,PPARG,CR1,ARHGDIB,RSAD2,IGF1,PYCARD,MYO1F,LAMP3,CTSL,MARCO,CTSS,CXCL8,SLAMF8,LGMN,INHBA,RIPK2,PTPN22,PTAFR,ITGAM,ITGB2,LILRB1,NOD2,CD84,CLEC4A,BTK,GRN,LEP,LGALS1,CD14,TIMP1,CD28,CD86,CD36,TLR1,TLR2,TLR4,CRTAM,TREM2,LHFPL2,IRAK3,DUSP10,TNF…
GO: Biological Process	GO:0050670	regulation of lymphocyte proliferation			9.991e-24	6.266e-20	6.204e-22	5.783e-21	40	238	CEBPB,HLA-DPA1,HLA-DPB1,LILRB2,CD300A,VSIG4,ADA,CCR2,TYROBP,CLC,FCGR2B,AHR,AIF1,CCL5,GPNMB,MNDA,ANXA1,IGF1,PYCARD,IL6,IL10,RIPK2,PTPN22,LILRB1,PTPRC,BTK,RAC2,LST1,GPR183,LEP,LGALS3,CORO1A,CD28,CD86,CD38,TLR4,CD44,TNFRSF1B,LYN,NCKAP1L
GO: Biological Process	GO:0032944	regulation of mononuclear cell proliferation			1.383e-23	8.675e-20	8.505e-22	7.928e-21	40	240	CEBPB,HLA-DPA1,HLA-DPB1,LILRB2,CD300A,VSIG4,ADA,CCR2,TYROBP,CLC,FCGR2B,AHR,AIF1,CCL5,GPNMB,MNDA,ANXA1,IGF1,PYCARD,IL6,IL10,RIPK2,PTPN22,LILRB1,PTPRC,BTK,RAC2,LST1,GPR183,LEP,LGALS3,CORO1A,CD28,CD86,CD38,TLR4,CD44,TNFRSF1B,LYN,NCKAP1L
GO: Biological Process	GO:0006909	phagocytosis			1.919e-23	1.204e-19	1.168e-21	1.089e-20	49	382	ABCA1,CD300A,CORO1C,CLEC7A,CCR2,TYROBP,COLEC12,FCER1G,FCGR2A,FCGR2B,FCN1,AIF1,CCL2,BIN2,SRPX,FGR,MERTK,VAV1,ANXA1,IRF8,PPARG,MSR1,PYCARD,IGKC,IGLC1,MARCO,NCF2,NCF4,ITGAM,ITGB2,NOD2,PTPRC,C3,ARHGAP25,DOCK2,RAB31,ARPC1B,LEP,CORO1A,THBS1,CD14,CD36,TLR2,TLR4,TREM2,TRBC1,LYN,HCK,NCKAP1L
GO: Biological Process	GO:0050663	cytokine secretion			2.241e-23	1.405e-19	1.351e-21	1.26e-20	42	272	ABCA1,CLEC5A,TCIRG1,CHI3L1,TWIST1,S100A12,FBLN1,FCGR2B,FCN1,AIF1,FGR,MMP12,AIM2,FN1,ANXA1,RGCC,POSTN,SRGN,PYCARD,IL6,IL10,RIPK2,PTPN22,LILRB1,NOD2,CD84,CCN4,IL33,CASP1,LCP2,LEP,NLRP3,CD14,CD36,TLR1,TLR2,TLR4,CRTAM,TREM1,TNFAIP3,TNFRSF1B,LYN
GO: Biological Process	GO:0002683	negative regulation of immune system process			4.231e-23	2.653e-19	2.527e-21	2.356e-20	56	515	CEBPB,LILRB2,CD300A,VSIG4,HMOX1,LY96,ADA,CCR2,TYROBP,FBN1,FCER1G,FCGR2B,MICB,LPXN,CCL2,GPR171,GPNMB,MERTK,MMP12,MNDA,COL3A1,ANXA1,SAMHD1,PPARG,CR1,FAS,MILR1,IGF1,IL7R,CXCR2,SLAMF8,IL10,INHBA,PTPN22,SAMSN1,LILRB1,NOD2,CD84,PTPRC,BTK,IL33,LILRB4,LST1,GRN,EMILIN1,LGALS3,THBS1,CD14,CD86,TLR4,CD44,IRAK3,DUSP10,TNFAIP3,GREM1,LYN
GO: Biological Process	GO:0002696	positive regulation of leukocyte activation			4.947e-23	3.102e-19	2.927e-21	2.728e-20	51	425	HLA-DMA,HLA-DPA1,HLA-DPB1,LILRB2,CLEC7A,ADA,CCR2,ADORA2B,TYROBP,FCER1G,AIF1,CCL2,CCL5,FGR,VAV1,ANXA1,MAP3K8,IGF1,PYCARD,IGKC,IGLC1,IL6,IL7R,IL10,RIPK2,PTPN22,PTAFR,ITGAM,ITGB2,LILRB1,NOD2,PTPRC,BTK,IL33,LILRB4,GPR183,LEP,LGALS1,NLRP3,CORO1A,THBS1,EGR3,CD28,CD86,CD38,TLR4,TREM2,DUSP10,TRBC1,LYN,NCKAP1L
GO: Biological Process	GO:0030335	positive regulation of cell migration			6.163e-23	3.865e-19	3.612e-21	3.367e-20	61	617	PDGFRA,ACTA2,CLEC7A,HMOX1,CCR2,ADORA2B,FBLN1,AIF1,CCL2,FGF7,CCR1,CCL4,CCL5,CCL7,CCL8,CCL11,GPNMB,MMP2,CCL20,FGR,MMP9,COL1A1,SELL,FN1,ANXA1,ICAM1,POSTN,IGF1,CCN1,PYCARD,MYO1F,IL6,CXCL8,LRRC15,CXCR2,LGMN,MYO5A,ITGA4,PTAFR,ITGAX,PTGS2,NRP2,CCN4,SRPX2,PTPRC,ACKR3,C3AR1,C5AR1,RAC2,PLA2G7,GRN,EDNRA,LGALS3,CORO1A,THBS1,TLR2,SERPINE1,TREM2,TNFAIP6,LYN,NCKAP1L
GO: Biological Process	GO:2000147	positive regulation of cell motility			1.069e-22	6.706e-19	6.209e-21	5.788e-20	62	644	PDGFRA,ACTA2,CLEC7A,HMOX1,TWIST1,CCR2,ADORA2B,FBLN1,AIF1,CCL2,FGF7,CCR1,CCL4,CCL5,CCL7,CCL8,CCL11,GPNMB,MMP2,CCL20,FGR,MMP9,COL1A1,SELL,FN1,ANXA1,ICAM1,POSTN,IGF1,CCN1,PYCARD,MYO1F,IL6,CXCL8,LRRC15,CXCR2,LGMN,MYO5A,ITGA4,PTAFR,ITGAX,PTGS2,NRP2,CCN4,SRPX2,PTPRC,ACKR3,C3AR1,C5AR1,RAC2,PLA2G7,GRN,EDNRA,LGALS3,CORO1A,THBS1,TLR2,SERPINE1,TREM2,TNFAIP6,LYN,NCKAP1L
GO: Biological Process	GO:1901700	response to oxygen-containing compound			1.295e-22	8.123e-19	7.452e-21	6.946e-20	110	1839	ABCA1,EREG,CEBPB,PDGFRA,LILRB2,ACP5,SERPINF1,CLEC7A,TCIRG1,HMOX1,LY96,ADA,ME1,ADCY7,S100A8,COLEC12,FBN1,FCGR2B,PIK3CG,MICB,UCP2,CXCL9,AHR,HRH1,AIF1,CCL2,CCL5,CCL7,CCR5,MMP2,MMP9,MMP12,PLN,LY86,COL1A1,COL1A2,COL3A1,SELL,MRC1,COL5A2,COL16A1,ANXA1,FOLR2,ICAM1,IRF8,APOE,PPARG,PPBP,SLC1A3,AQP9,AREG,POSTN,IGF1,CSF2RB,PYCARD,IL1RN,IL6,CXCL8,CYBB,IL10,IL10RA,LGMN,MYO5A,INHBA,RIPK2,PTPN22,NCF2,ITGA4,PTAFR…
GO: Biological Process	GO:0040017	positive regulation of locomotion			2.838e-22	1.78e-18	1.618e-20	1.508e-19	63	677	PDGFRA,ACTA2,CLEC7A,HMOX1,TWIST1,CCR2,ADORA2B,FBLN1,AIF1,CCL2,FGF7,CCR1,CCL4,CCL5,CCL7,CCL8,CCL11,GPNMB,MMP2,CCL20,FGR,MMP9,COL1A1,SELL,FN1,ANXA1,ICAM1,POSTN,IGF1,CCN1,PYCARD,MYO1F,IL6,CXCL8,LRRC15,CXCR2,LGMN,MYO5A,ITGA4,PTAFR,ITGAX,PTGS2,NRP2,CCN4,SRPX2,PTPRC,ACKR3,SCG2,C3AR1,C5AR1,RAC2,PLA2G7,GRN,EDNRA,LGALS3,CORO1A,THBS1,TLR2,SERPINE1,TREM2,TNFAIP6,LYN,NCKAP1L
GO: Biological Process	GO:0051241	negative regulation of multicellular organismal process			3.244e-22	2.035e-18	1.833e-20	1.708e-19	97	1500	PDGFRA,CORO1C,ACP5,SERPINF1,VSIG4,HMOX1,ADA,ADCY7,PLAC8,TWIST1,CCR2,ADORA2B,TYROBP,FAP,FBLN1,FBN1,FCGR2B,PIK3CG,AHR,CCL2,CCR1,PLAUR,CCL11,GPR171,GPNMB,MMP2,MERTK,MMP9,PLN,COL3A1,COL5A1,COL5A2,FN1,ANXA1,RGCC,APOC1,APOE,PPARG,FAS,AREG,ARHGDIB,IGF1,SRGN,PYCARD,IL6,CTSZ,SLAMF8,IL10,LGMN,INHBA,ASPN,GATA6,PTPN22,DCN,LILRB1,PTGS2,NOD2,CD84,STK4,CCN4,PTPRC,CLEC4A,SULF1,BTK,KCNMA1,NAV3,IL33,LILRB4,DPYSL3,…
GO: Biological Process	GO:0051272	positive regulation of cellular component movement			7.235e-22	4.538e-18	4.052e-20	3.777e-19	62	668	PDGFRA,ACTA2,CLEC7A,HMOX1,TWIST1,CCR2,ADORA2B,FBLN1,AIF1,CCL2,FGF7,CCR1,CCL4,CCL5,CCL7,CCL8,CCL11,GPNMB,MMP2,CCL20,FGR,MMP9,COL1A1,SELL,FN1,ANXA1,ICAM1,POSTN,IGF1,CCN1,PYCARD,MYO1F,IL6,CXCL8,LRRC15,CXCR2,LGMN,MYO5A,ITGA4,PTAFR,ITGAX,PTGS2,NRP2,CCN4,SRPX2,PTPRC,ACKR3,C3AR1,C5AR1,RAC2,PLA2G7,GRN,EDNRA,LGALS3,CORO1A,THBS1,TLR2,SERPINE1,TREM2,TNFAIP6,LYN,NCKAP1L
GO: Biological Process	GO:0048514	blood vessel morphogenesis			7.895e-22	4.952e-18	4.382e-20	4.085e-19	66	755	EREG,PDGFRA,SERPINF1,HMOX1,CHI3L1,TWIST1,CCR2,FAP,PIK3CG,AHR,CCL2,CCL5,CCL11,GPNMB,MMP2,MMP9,COL3A1,COL8A1,COL8A2,PRRX1,COL15A1,COMP,FN1,ANXA1,RGCC,APOE,PPARG,CCN1,IL6,CXCL8,CXCR2,CYBB,IL10,GATA6,DCN,HPSE,ITGAX,ITGB2,PTGIS,PTGS2,NRP2,STK4,SRPX2,SULF1,ACKR3,SCG2,C3,C3AR1,C5AR1,PLXDC1,GRN,ADAM12,EMILIN1,LEP,EDNRA,LGALS3,ZFPM2,TGFBI,THBS1,THBS2,EGR3,LOX,CD36,SERPINE1,TNFAIP3,GREM1
GO: Biological Process	GO:0001568	blood vessel development			1.093e-21	6.853e-18	6.011e-20	5.603e-19	70	849	EREG,PDGFRA,SERPINF1,ACTA2,HMOX1,CHI3L1,TWIST1,CCR2,FAP,PIK3CG,AHR,CCL2,CCL5,CCL11,GPNMB,MMP2,MMP9,COL1A1,COL1A2,COL3A1,COL5A1,COL8A1,COL8A2,PRRX1,COL15A1,COMP,FN1,ANXA1,RGCC,APOE,PPARG,CCN1,IL6,CXCL8,CXCR2,CYBB,IL10,GATA6,DCN,HPSE,ITGAX,ITGB2,PTGIS,PTGS2,NRP2,STK4,SRPX2,SULF1,ACKR3,SCG2,C3,C3AR1,C5AR1,PLXDC1,GRN,ADAM12,EMILIN1,LEP,EDNRA,LGALS3,ZFPM2,TGFBI,THBS1,THBS2,EGR3,LOX,CD36,SERPINE1,TNFAI…
GO: Biological Process	GO:0002521	leukocyte differentiation			1.13e-21	7.085e-18	6.161e-20	5.743e-19	58	591	CEBPB,HLA-DMA,LILRB2,TCIRG1,EVI2B,ADA,CCR2,TYROBP,FBN1,FCER1G,FCGR2B,AHR,CCR1,CCL5,CCL20,MERTK,MMP9,VAV1,ANXA1,DOCK10,PPARG,CR1,FAS,RSAD2,IL6,IL7R,SLAMF8,IL10,INHBA,RASSF2,RIPK2,PTPN22,ITGA4,ITGAM,LILRB1,ITK,CCN4,PTPRC,BTK,LILRB4,DOCK2,GPR183,LEP,LGALS1,NLRP3,LGALS3,EGR3,CD28,CD86,TLR2,TLR4,CD44,TREM2,DUSP10,TNFAIP3,LYN,HCLS1,NCKAP1L
GO: Biological Process	GO:1903037	regulation of leukocyte cell-cell adhesion			1.691e-21	1.06e-17	9.141e-20	8.521e-19	44	336	CEBPB,HLA-DMA,HLA-DPA1,HLA-DPB1,LILRB2,CD300A,VSIG4,ADA,CCR2,FCGR2B,AIF1,CCL2,CCL5,GPNMB,VAV1,ANXA1,MAP3K8,ICAM1,IGF1,PYCARD,IL6,IL7R,IL10,RIPK2,PTPN22,ITGA4,PTAFR,ITGB2,LILRB1,NOD2,PTPRC,LILRB4,LEP,LGALS1,NLRP3,LGALS3,CORO1A,EGR3,CD28,CD86,CD44,DUSP10,LYN,NCKAP1L
GO: Biological Process	GO:0042060	wound healing			1.788e-21	1.121e-17	9.584e-20	8.934e-19	59	617	EREG,PDGFRA,ACTA2,CLEC7A,ACTN1,HMOX1,CCR2,S100A8,S100A9,FAP,FBLN1,FCER1G,PIK3CG,CCL2,FGF7,PLAUR,MAFF,MERTK,PLEK,MMP12,VAV1,COL1A1,COL1A2,COL3A1,COL5A1,VWF,COMP,FN1,ANXA1,APOE,MMRN1,POSTN,IGF1,CCN1,IL6,GATA6,DCN,HPSE,CCN4,C3,NINJ2,GNA15,RAP2B,SH2B3,LCP1,LCP2,PAPSS2,ZFPM2,THBD,THBS1,TIMP1,LOX,CD36,TLR4,SERPINE1,CD44,DUSP10,TNFAIP3,LYN
GO: Biological Process	GO:0050863	regulation of T cell activation			1.953e-21	1.225e-17	1.038e-19	9.674e-19	45	354	CEBPB,HLA-DMA,HLA-DPA1,HLA-DPB1,LILRB2,CD300A,VSIG4,ADA,CCR2,CLC,FCGR2B,AIF1,CCL2,CCL5,GPNMB,CCL20,VAV1,ANXA1,MAP3K8,CR1,IGF1,PYCARD,IL6,IL7R,IL10,RIPK2,PTPN22,LILRB1,NOD2,PTPRC,RAC2,LILRB4,LEP,LGALS1,NLRP3,LGALS3,CORO1A,EGR3,CD28,CD86,CD44,DUSP10,TNFRSF1B,LYN,NCKAP1L
GO: Biological Process	GO:0033993	response to lipid			2.133e-21	1.338e-17	1.124e-19	1.048e-18	76	1000	ABCA1,CEBPB,LILRB2,ACP5,SERPINF1,LY96,S100A8,MICB,CXCL9,AHR,AIF1,CCL2,CCL5,CCR5,MMP2,PLN,LY86,COL1A1,MRC1,ANXA1,ICAM1,IRF8,PPARG,PPBP,FAS,AREG,POSTN,ABCG1,IGF1,CSF2RB,PYCARD,IL1RN,IL6,CXCL8,CYBB,IL10,IL10RA,INHBA,RIPK2,PTPN22,NCF2,PTAFR,PTGDR,DCN,LILRB1,PTGS2,NOD2,CD84,KCNMA1,C5AR1,NPC1,CASP1,GRN,CXCL2,CXCL3,ARPC1B,LEP,EDNRA,NLRP3,THBD,THBS1,CD14,CD86,LOX,CD36,CD38,TLR2,TLR4,SERPINE1,TREM2,IRAK3,…
GO: Biological Process	GO:0001944	vasculature development			2.405e-21	1.508e-17	1.257e-19	1.172e-18	71	884	EREG,PDGFRA,SERPINF1,ACTA2,HMOX1,CHI3L1,TWIST1,CCR2,FAP,PIK3CG,AHR,CCL2,CCL5,CCL11,GPNMB,MMP2,MMP9,COL1A1,COL1A2,COL3A1,COL5A1,COL8A1,COL8A2,PRRX1,COL15A1,COMP,FN1,ANXA1,RGCC,APOE,PPARG,IGF1,CCN1,IL6,CXCL8,CXCR2,CYBB,IL10,GATA6,DCN,HPSE,ITGAX,ITGB2,PTGIS,PTGS2,NRP2,STK4,SRPX2,SULF1,ACKR3,SCG2,C3,C3AR1,C5AR1,PLXDC1,GRN,ADAM12,EMILIN1,LEP,EDNRA,LGALS3,ZFPM2,TGFBI,THBS1,THBS2,EGR3,LOX,CD36,SERPINE1,…
GO: Biological Process	GO:0098609	cell-cell adhesion			3.05e-21	1.913e-17	1.581e-19	1.474e-18	72	911	CEBPB,HLA-DMA,PDGFRA,HLA-DPA1,HLA-DPB1,LILRB2,CD300A,VSIG4,ACTN1,ADA,CCR2,S100A8,S100A9,S100A11,FCGR2B,PIK3CG,AIF1,CCL2,COL14A1,CCL5,GPNMB,PLEK,VAV1,SELL,COL8A2,COMP,ANXA1,MAP3K8,ICAM1,RGCC,IGF1,CCN1,PYCARD,CSTA,IL1RN,IL6,IL7R,IL10,RIPK2,FXYD5,PTPN22,ITGA4,PTAFR,ITGAM,ITGAX,ITGB2,LILRB1,NOD2,CD84,SRPX2,PTPRC,NINJ2,RAC2,LILRB4,RAP2B,SH2B3,OLR1,LEP,LGALS1,NLRP3,LGALS3,CORO1A,EGR3,CD28,CD86,CD33,CD4…
GO: Biological Process	GO:0001525	angiogenesis			3.172e-21	1.989e-17	1.631e-19	1.52e-18	60	645	EREG,PDGFRA,SERPINF1,HMOX1,CHI3L1,TWIST1,CCR2,FAP,PIK3CG,AHR,CCL2,CCL5,CCL11,GPNMB,MMP2,MMP9,COL8A1,COL8A2,COL15A1,FN1,ANXA1,RGCC,PPARG,CCN1,IL6,CXCL8,CXCR2,CYBB,IL10,GATA6,DCN,HPSE,ITGAX,ITGB2,PTGIS,PTGS2,NRP2,STK4,SRPX2,SULF1,ACKR3,SCG2,C3,C3AR1,C5AR1,PLXDC1,GRN,ADAM12,EMILIN1,LEP,EDNRA,LGALS3,TGFBI,THBS1,THBS2,EGR3,CD36,SERPINE1,TNFAIP3,GREM1
GO: Biological Process	GO:1903555	regulation of tumor necrosis factor superfamily cytokine production			1.13e-20	7.089e-17	5.763e-19	5.372e-18	33	184	ACP5,CLEC7A,LY96,TWIST1,CCR2,TYROBP,FCER1G,CCL2,GPNMB,IGF1,PYCARD,CYBB,IL10,RIPK2,PTPN22,PTAFR,LILRB1,NOD2,CD84,PTPRC,CLEC4A,LEP,THBS1,CD14,CD86,CD33,CD36,TLR1,TLR2,TLR4,TREM2,IRAK3,TNFAIP3
GO: Biological Process	GO:0050729	positive regulation of inflammatory response			1.661e-20	1.042e-16	8.402e-19	7.832e-18	32	173	CEBPB,CLEC7A,TLR7,FABP4,CCR2,S100A8,ADORA2B,S100A9,S100A12,FCER1G,PIK3CG,CCL5,CCL18,ALOX5AP,CTSS,IL6,PTGS2,NOD2,CCN4,BTK,C3,IL33,PLA2G7,GRN,NUPR1,EDNRA,CD28,TLR2,TLR4,SERPINE1,TREM2,OSMR
GO: Biological Process	GO:0022407	regulation of cell-cell adhesion			2.52e-20	1.581e-16	1.265e-18	1.179e-17	49	450	CEBPB,HLA-DMA,HLA-DPA1,HLA-DPB1,LILRB2,CD300A,VSIG4,ADA,CCR2,FCGR2B,AIF1,CCL2,CCL5,GPNMB,VAV1,ANXA1,MAP3K8,ICAM1,RGCC,IGF1,PYCARD,IL1RN,IL6,IL7R,IL10,RIPK2,FXYD5,PTPN22,ITGA4,PTAFR,ITGB2,LILRB1,NOD2,PTPRC,LILRB4,SH2B3,LEP,LGALS1,NLRP3,LGALS3,CORO1A,EGR3,CD28,CD86,CD44,DUSP10,TNFAIP3,LYN,NCKAP1L
GO: Biological Process	GO:0071706	tumor necrosis factor superfamily cytokine production			2.696e-20	1.691e-16	1.342e-18	1.251e-17	33	189	ACP5,CLEC7A,LY96,TWIST1,CCR2,TYROBP,FCER1G,CCL2,GPNMB,IGF1,PYCARD,CYBB,IL10,RIPK2,PTPN22,PTAFR,LILRB1,NOD2,CD84,PTPRC,CLEC4A,LEP,THBS1,CD14,CD86,CD33,CD36,TLR1,TLR2,TLR4,TREM2,IRAK3,TNFAIP3
GO: Biological Process	GO:0010941	regulation of cell death			2.722e-20	1.707e-16	1.344e-18	1.253e-17	110	1969	CEBPB,STK17B,CLEC5A,SERPINF1,CLEC7A,EVI2B,ACTN1,HMOX1,ADA,PLAC8,TWIST1,S100A8,S100A9,TYROBP,FAP,FCER1G,FCGR2B,PIK3CG,UCP2,AHR,AIF1,CCL2,CCL5,PLAUR,CCR5,SRPX,GPNMB,MMP2,ALDH1A3,MERTK,MMP9,MNDA,VAV1,SELL,SFRP4,COMP,FN1,ANXA1,ICAM1,RGCC,APOE,PPARG,FAS,IGF1,CCN1,PYCARD,LAMP3,CTSD,IL1RN,IL6,CTSZ,IL7R,CXCR2,IL10,LGMN,INHBA,RASSF2,NAIP,RIPK2,GATA6,NCF2,BCL2A1,ITGA4,ITGAM,ITGB2,LILRB1,PTGIS,PTGS2,NOD2,ST…
GO: Biological Process	GO:1903039	positive regulation of leukocyte cell-cell adhesion			2.995e-20	1.878e-16	1.467e-18	1.368e-17	37	247	HLA-DMA,HLA-DPA1,HLA-DPB1,LILRB2,ADA,CCR2,AIF1,CCL2,CCL5,VAV1,ANXA1,MAP3K8,ICAM1,IGF1,PYCARD,IL6,IL7R,RIPK2,PTPN22,ITGA4,PTAFR,ITGB2,LILRB1,NOD2,PTPRC,LILRB4,LEP,LGALS1,NLRP3,CORO1A,EGR3,CD28,CD86,CD44,DUSP10,LYN,NCKAP1L
GO: Biological Process	GO:0002687	positive regulation of leukocyte migration			3.834e-20	2.404e-16	1.859e-18	1.733e-17	30	152	CCR2,AIF1,CCL2,CCR1,CCL4,CCL5,CCL7,CCL8,CCL20,MMP9,SELL,ICAM1,PYCARD,IL6,CXCL8,CXCR2,LGMN,ITGA4,PTAFR,C3AR1,C5AR1,RAC2,PLA2G7,EDNRA,LGALS3,THBS1,TLR2,SERPINE1,TREM2,NCKAP1L
GO: Biological Process	GO:0002548	monocyte chemotaxis			3.854e-20	2.417e-16	1.859e-18	1.733e-17	22	68	CCR2,S100A12,AIF1,CCL2,CCR1,CCL4,CCL5,CCL7,CCL8,CCL11,CCL18,CCL20,ANXA1,FOLR2,IL6,SLAMF8,LGMN,PLA2G7,LGALS3,SERPINE1,GREM1,LYN
GO: Biological Process	GO:0050866	negative regulation of cell activation			6.877e-20	4.313e-16	3.293e-18	3.069e-17	35	223	CEBPB,PDGFRA,LILRB2,CD300A,VSIG4,HMOX1,CCR2,TYROBP,FCGR2B,GPNMB,MERTK,MNDA,ANXA1,APOE,PPARG,FAS,MILR1,IL10,INHBA,PTPN22,SAMSN1,LILRB1,CD84,PTPRC,BTK,LST1,SH2B3,GRN,EMILIN1,LGALS3,THBD,CD86,CD44,TNFAIP3,LYN
GO: Biological Process	GO:0032680	regulation of tumor necrosis factor production			6.93e-20	4.346e-16	3.293e-18	3.069e-17	32	181	ACP5,CLEC7A,LY96,TWIST1,CCR2,TYROBP,FCER1G,CCL2,GPNMB,IGF1,PYCARD,CYBB,IL10,RIPK2,PTPN22,PTAFR,LILRB1,NOD2,CD84,PTPRC,CLEC4A,LEP,THBS1,CD14,CD33,CD36,TLR1,TLR2,TLR4,TREM2,IRAK3,TNFAIP3
GO: Biological Process	GO:0071674	mononuclear cell migration			7.057e-20	4.426e-16	3.328e-18	3.102e-17	25	98	CCR2,S100A12,AIF1,CCL2,CCR1,CCL4,CCL5,CCL7,CCL8,CCL11,CCL18,CCL20,ANXA1,FOLR2,IL6,SLAMF8,LGMN,C3AR1,C5AR1,PLA2G7,LGALS3,THBS1,SERPINE1,GREM1,LYN
GO: Biological Process	GO:0032640	tumor necrosis factor production			1.161e-19	7.28e-16	5.433e-18	5.064e-17	32	184	ACP5,CLEC7A,LY96,TWIST1,CCR2,TYROBP,FCER1G,CCL2,GPNMB,IGF1,PYCARD,CYBB,IL10,RIPK2,PTPN22,PTAFR,LILRB1,NOD2,CD84,PTPRC,CLEC4A,LEP,THBS1,CD14,CD33,CD36,TLR1,TLR2,TLR4,TREM2,IRAK3,TNFAIP3
GO: Biological Process	GO:0002703	regulation of leukocyte mediated immunity			1.928e-19	1.209e-15	8.955e-18	8.347e-17	35	230	CD300A,HMOX1,ADGRE2,CCR2,ADORA2B,CLC,FCER1G,FCGR2B,MICB,CCL20,FGR,VAV1,CR1,RSAD2,IL6,IL7R,IL10,PTAFR,ITGAM,ITGB2,LILRB1,NOD2,CD84,PTPRC,BTK,C3,RAC2,LEP,NLRP3,CD28,TLR2,TLR4,CRTAM,TNFRSF1B,LYN
GO: Biological Process	GO:0009967	positive regulation of signal transduction			2.772e-19	1.738e-15	1.278e-17	1.191e-16	103	1823	EREG,PDGFRA,CD300A,ACTA2,TLR7,HMOX1,LY96,CHI3L1,ADA,FABP5,CCR2,S100A8,ADORA2B,S100A9,S100A12,FCGR2B,PIK3CG,CCL2,FGF7,CCR1,CCL4,CCL5,PLAUR,CCL7,CCL8,CCL11,SRPX,GPNMB,CCL18,ALDH1A3,CCL20,FGR,MMP9,MMP12,LY86,VAV1,COL1A1,COL3A1,PRRX1,SFRP4,GPR65,LMCD1,MAP3K8,FPR1,ICAM1,APOE,FAS,SLA,AREG,RSAD2,IGF1,CCN1,PYCARD,IL1RN,MARCO,IL6,IL7R,IL10,IL10RA,INHBA,RASSF2,RIPK2,GATA6,PTPN22,DCN,HPSE,PTGIS,ZEB2,NOD2,CD…
GO: Biological Process	GO:0002790	peptide secretion			2.924e-19	1.834e-15	1.339e-17	1.248e-16	61	729	ABCA1,CLEC5A,TCIRG1,CHI3L1,TWIST1,S100A8,S100A9,S100A12,FBLN1,FCGR2B,FCN1,UCP2,AIF1,CCL5,FGR,PLEK,MMP12,AIM2,COMP,FN1,ANXA1,RGCC,APOE,PPARG,POSTN,ABCG1,RSAD2,IGF1,SRGN,PYCARD,IL1RN,IL6,IL10,MYO5A,RIPK2,PTPN22,LILRB1,NOD2,CD84,CCN4,SCG2,IL33,CASP1,LCP2,LEP,NLRP3,CD14,CD33,CD36,CD38,TLR1,TLR2,TLR4,CRTAM,TREM2,TREM1,TNFAIP3,TNFRSF1B,CYB5R4,LYN,M6PR
GO: Biological Process	GO:0071692	protein localization to extracellular region			3.706e-19	2.325e-15	1.685e-17	1.57e-16	59	688	ABCA1,CLEC5A,TCIRG1,CHI3L1,TWIST1,S100A12,FBLN1,FBN1,FCGR2B,FCN1,UCP2,AIF1,CCL5,FGR,PLEK,MMP12,AIM2,COMP,FN1,ANXA1,RGCC,APOE,POSTN,ABCG1,RSAD2,IGF1,SRGN,PYCARD,IL1RN,IL6,IL10,MYO5A,RIPK2,PTPN22,LILRB1,NOD2,CD84,CCN4,SCG2,IL33,CASP1,LCP2,LEP,NLRP3,CD14,CD33,CD36,CD38,TLR1,TLR2,TLR4,CRTAM,TREM2,TREM1,TNFAIP3,TNFRSF1B,CYB5R4,LYN,M6PR
GO: Biological Process	GO:0008284	positive regulation of cell population proliferation			4.631e-19	2.904e-15	2.09e-17	1.948e-16	76	1096	EREG,PDGFRA,HLA-DPA1,HLA-DPB1,LILRB2,CLEC7A,TCIRG1,HMOX1,ADA,PLAC8,FABP4,TWIST1,CCR2,ADORA2B,FBLN1,AIF1,CCL2,FGF7,CCL5,CCL11,MMP2,MMP9,MMP12,PRRX1,COMP,FN1,ANXA1,FOLR2,AREG,IGF1,CCN1,PYCARD,IL6,CTSZ,IL7R,CXCR2,IL10,LGMN,RIPK2,GATA6,PTPN22,ITGA4,PTAFR,HPSE,ITGAX,PTGS2,NRP2,NOD2,CCN4,PTPRC,SCG2,C3AR1,C5AR1,RAC2,GRN,GPR183,LEP,EDNRA,LGALS3,ZFPM2,CORO1A,THBS1,TIMP1,EGR3,CD28,CD86,CD38,TLR4,SERPINE1,T…
GO: Biological Process	GO:0050707	regulation of cytokine secretion			5.201e-19	3.262e-15	2.33e-17	2.172e-16	35	237	CLEC5A,TWIST1,FBLN1,FCGR2B,FCN1,AIF1,FGR,MMP12,AIM2,FN1,ANXA1,RGCC,POSTN,SRGN,PYCARD,IL6,IL10,RIPK2,PTPN22,LILRB1,NOD2,CD84,CCN4,IL33,CASP1,NLRP3,CD14,CD36,TLR1,TLR2,TLR4,CRTAM,TNFAIP3,TNFRSF1B,LYN
GO: Biological Process	GO:0042098	T cell proliferation			6.983e-19	4.38e-15	3.106e-17	2.895e-16	34	224	CEBPB,HLA-DPA1,HLA-DPB1,LILRB2,VSIG4,CCR2,CLC,PIK3CG,AIF1,CCL5,GPNMB,ANXA1,IGF1,PYCARD,IL6,IL10,RIPK2,PTPN22,ITGAM,ITGAX,ITGB2,LILRB1,PTPRC,RAC2,DOCK2,LEP,LGALS3,CORO1A,CD28,CD86,CRTAM,CD44,TNFRSF1B,NCKAP1L
GO: Biological Process	GO:0009306	protein secretion			9.87e-19	6.191e-15	4.36e-17	4.064e-16	58	680	ABCA1,CLEC5A,TCIRG1,CHI3L1,TWIST1,S100A12,FBLN1,FCGR2B,FCN1,UCP2,AIF1,CCL5,FGR,PLEK,MMP12,AIM2,COMP,FN1,ANXA1,RGCC,APOE,POSTN,ABCG1,RSAD2,IGF1,SRGN,PYCARD,IL1RN,IL6,IL10,MYO5A,RIPK2,PTPN22,LILRB1,NOD2,CD84,CCN4,SCG2,IL33,CASP1,LCP2,LEP,NLRP3,CD14,CD33,CD36,CD38,TLR1,TLR2,TLR4,CRTAM,TREM2,TREM1,TNFAIP3,TNFRSF1B,CYB5R4,LYN,M6PR
GO: Biological Process	GO:0022409	positive regulation of cell-cell adhesion			1.034e-18	6.482e-15	4.533e-17	4.225e-16	38	290	HLA-DMA,HLA-DPA1,HLA-DPB1,LILRB2,ADA,CCR2,AIF1,CCL2,CCL5,VAV1,ANXA1,MAP3K8,ICAM1,IGF1,PYCARD,IL6,IL7R,IL10,RIPK2,PTPN22,ITGA4,PTAFR,ITGB2,LILRB1,NOD2,PTPRC,LILRB4,LEP,LGALS1,NLRP3,CORO1A,EGR3,CD28,CD86,CD44,DUSP10,LYN,NCKAP1L
GO: Biological Process	GO:0035592	establishment of protein localization to extracellular region			1.058e-18	6.635e-15	4.607e-17	4.295e-16	58	681	ABCA1,CLEC5A,TCIRG1,CHI3L1,TWIST1,S100A12,FBLN1,FCGR2B,FCN1,UCP2,AIF1,CCL5,FGR,PLEK,MMP12,AIM2,COMP,FN1,ANXA1,RGCC,APOE,POSTN,ABCG1,RSAD2,IGF1,SRGN,PYCARD,IL1RN,IL6,IL10,MYO5A,RIPK2,PTPN22,LILRB1,NOD2,CD84,CCN4,SCG2,IL33,CASP1,LCP2,LEP,NLRP3,CD14,CD33,CD36,CD38,TLR1,TLR2,TLR4,CRTAM,TREM2,TREM1,TNFAIP3,TNFRSF1B,CYB5R4,LYN,M6PR
GO: Biological Process	GO:0042981	regulation of apoptotic process			1.525e-18	9.566e-15	6.597e-17	6.149e-16	100	1779	CEBPB,STK17B,CLEC5A,CLEC7A,EVI2B,ACTN1,HMOX1,ADA,PLAC8,TWIST1,S100A8,S100A9,TYROBP,FAP,FCER1G,PIK3CG,UCP2,AIF1,CCL2,CCL5,PLAUR,CCR5,SRPX,MMP2,ALDH1A3,MERTK,MMP9,MNDA,VAV1,SELL,SFRP4,COMP,FN1,ANXA1,ICAM1,RGCC,APOE,PPARG,FAS,IGF1,CCN1,PYCARD,LAMP3,CTSD,IL1RN,IL6,CTSZ,IL7R,CXCR2,IL10,LGMN,INHBA,RASSF2,NAIP,RIPK2,GATA6,NCF2,BCL2A1,ITGA4,ITGAM,LILRB1,PTGIS,PTGS2,NOD2,STK4,PTPRC,ACKR3,SCG2,BTK,KCNMA1,C…
GO: Biological Process	GO:0002833	positive regulation of response to biotic stimulus			1.677e-18	1.052e-14	7.203e-17	6.714e-16	45	419	EREG,CD300A,CLEC7A,TLR7,LY96,S100A8,S100A9,COLEC12,FCER1G,FCN1,MICB,CCL5,MMP2,CLEC10A,MMP12,AIM2,LY86,MNDA,VAV1,RSAD2,PYCARD,CTSL,MARCO,CTSS,LGMN,RIPK2,PTPN22,PTAFR,ITGAM,ITGB2,NOD2,CLEC4A,BTK,GRN,CD14,CD86,CD36,TLR1,TLR2,TLR4,CRTAM,IRAK3,TNFAIP3,LYN,HCK
GO: Biological Process	GO:0035239	tube morphogenesis			1.72e-18	1.079e-14	7.339e-17	6.841e-16	73	1045	EREG,PDGFRA,SERPINF1,HMOX1,CHI3L1,TWIST1,CCR2,FAP,MGP,PIK3CG,AHR,CCL2,CCL5,CCL11,GPNMB,MMP2,MMP9,COL3A1,COL8A1,COL8A2,PRRX1,COL15A1,COMP,FN1,ANXA1,RGCC,APOE,PPARG,AREG,IGF1,CCN1,CTSD,IL6,CTSZ,CXCL8,CXCR2,CYBB,IL10,GATA6,DCN,HPSE,ITGAX,ITGB2,PTGIS,PTGS2,ZEB2,NRP2,STK4,SRPX2,SULF1,ACKR3,SCG2,C3,C3AR1,C5AR1,PLXDC1,GRN,ADAM12,EMILIN1,LEP,EDNRA,LGALS3,ZFPM2,TGFBI,THBS1,THBS2,EGR3,LOX,CD36,SERPINE1,CD4…
GO: Biological Process	GO:0045785	positive regulation of cell adhesion			3.244e-18	2.035e-14	1.375e-16	1.281e-15	47	465	HLA-DMA,HLA-DPA1,HLA-DPB1,LILRB2,ADA,CCR2,FBLN1,AIF1,CCL2,CCL5,VAV1,COL8A1,COL16A1,FN1,ANXA1,MAP3K8,ICAM1,MMRN1,IGF1,CCN1,PYCARD,IL6,IL7R,IL10,RIPK2,PTPN22,ITGA4,PTAFR,ITGB2,LILRB1,NOD2,PTPRC,LILRB4,EMILIN1,LEP,LGALS1,NLRP3,CORO1A,THBS1,EGR3,CD28,CD86,CD36,CD44,DUSP10,LYN,NCKAP1L
GO: Biological Process	GO:0043067	regulation of programmed cell death			5.232e-18	3.282e-14	2.202e-16	2.053e-15	100	1811	CEBPB,STK17B,CLEC5A,CLEC7A,EVI2B,ACTN1,HMOX1,ADA,PLAC8,TWIST1,S100A8,S100A9,TYROBP,FAP,FCER1G,PIK3CG,UCP2,AIF1,CCL2,CCL5,PLAUR,CCR5,SRPX,MMP2,ALDH1A3,MERTK,MMP9,MNDA,VAV1,SELL,SFRP4,COMP,FN1,ANXA1,ICAM1,RGCC,APOE,PPARG,FAS,IGF1,CCN1,PYCARD,LAMP3,CTSD,IL1RN,IL6,CTSZ,IL7R,CXCR2,IL10,LGMN,INHBA,RASSF2,NAIP,RIPK2,GATA6,NCF2,BCL2A1,ITGA4,ITGAM,LILRB1,PTGIS,PTGS2,NOD2,STK4,PTPRC,ACKR3,SCG2,BTK,KCNMA1,C…
GO: Biological Process	GO:0035295	tube development			5.305e-18	3.327e-14	2.218e-16	2.068e-15	81	1276	EREG,PDGFRA,SERPINF1,HMOX1,CHI3L1,ADA,TWIST1,CCR2,FAP,MGP,BASP1,PIK3CG,AHR,CCL2,FGF7,CCL5,CCL11,GPNMB,MMP2,HSD11B1,MMP9,COL3A1,COL8A1,COL8A2,PRRX1,COL15A1,COMP,FN1,ANXA1,RGCC,APOE,PPARG,AREG,IGF1,CCN1,VCAN,CTSD,IL6,CTSZ,CXCL8,CXCR2,CYBB,IL10,GATA6,DCN,HPSE,ITGAX,ITGB2,PTGIS,PTGS2,ZEB2,NRP2,STK4,SRPX2,SULF1,ACKR3,SCG2,C3,C3AR1,C5AR1,CRISPLD2,TIGAR,PLXDC1,GRN,ADAM12,EMILIN1,LEP,EDNRA,LGALS3,ZFPM2,T…
GO: Biological Process	GO:0045089	positive regulation of innate immune response			6.691e-18	4.196e-14	2.779e-16	2.59e-15	43	396	EREG,CD300A,CLEC7A,TLR7,LY96,S100A8,S100A9,COLEC12,FCER1G,FCN1,MICB,CCL5,MMP2,CLEC10A,MMP12,AIM2,MNDA,VAV1,RSAD2,PYCARD,CTSL,MARCO,CTSS,LGMN,RIPK2,PTPN22,PTAFR,ITGAM,ITGB2,NOD2,CLEC4A,BTK,CD14,CD86,CD36,TLR1,TLR2,TLR4,CRTAM,IRAK3,TNFAIP3,LYN,HCK
GO: Biological Process	GO:0002699	positive regulation of immune effector process			8.251e-18	5.175e-14	3.404e-16	3.173e-15	34	242	CD300A,HMOX1,ADGRE2,CCR2,ADORA2B,FCER1G,MICB,CCL2,FGR,VAV1,ANXA1,RSAD2,IL6,RIPK2,PTPN22,PTAFR,ITGAM,ITGB2,LILRB1,NOD2,CD84,PTPRC,BTK,C3,IL33,RAC2,NLRP3,CD28,CD86,CD36,TLR2,TLR4,CRTAM,LYN
GO: Biological Process	GO:0001818	negative regulation of cytokine production			8.829e-18	5.538e-14	3.619e-16	3.374e-15	39	326	ACP5,VSIG4,HMOX1,ADCY7,TWIST1,TYROBP,FBLN1,FCGR2B,GPNMB,MERTK,FN1,ANXA1,RGCC,PPARG,IGF1,SRGN,PYCARD,IL6,IL10,INHBA,GATA6,PTPN22,LILRB1,NOD2,CD84,PTPRC,CLEC4A,BTK,NAV3,IL33,NLRP3,THBS1,CD33,TLR2,TLR4,TREM2,IRAK3,TNFAIP3,NCKAP1L
GO: Biological Process	GO:0072359	circulatory system development			1.26e-17	7.903e-14	5.132e-16	4.783e-15	82	1322	EREG,PDGFRA,SERPINF1,ACTA2,HMOX1,CHI3L1,TWIST1,CCR2,FAP,FBN1,BASP1,PIK3CG,AHR,CCL2,COL14A1,CCL5,CCL11,GPNMB,MMP2,MMP9,PLN,COL1A1,COL1A2,COL3A1,COL5A1,COL8A1,COL8A2,PRRX1,COL15A1,COMP,FN1,ANXA1,RGCC,APOE,PPARG,IGF1,CCN1,VCAN,IL6,CXCL8,ADAP2,CXCR2,CYBB,IL10,GATA6,ITGA4,DCN,HPSE,ITGAX,ITGB2,PTGIS,PTGS2,NRP2,STK4,CCN4,SRPX2,PDLIM3,SULF1,ACKR3,SCG2,C3,C3AR1,C5AR1,PLXDC1,GRN,ADAM12,EMILIN1,RGS2,LEP,EDN…
GO: Biological Process	GO:0002819	regulation of adaptive immune response			1.732e-17	1.086e-13	7.009e-16	6.533e-15	30	187	HLA-DMA,ADA,ADCY7,CCR2,CLC,FCER1G,FCGR2B,CCL20,ANXA1,CR1,RSAD2,PYCARD,IL6,IL7R,IL10,RIPK2,SAMSN1,LILRB1,NOD2,PTPRC,BTK,C3,IL33,NLRP3,CD28,CD44,CD48,DUSP10,TNFAIP3,TNFRSF1B
GO: Biological Process	GO:1902533	positive regulation of intracellular signal transduction			2.021e-17	1.267e-13	8.124e-16	7.573e-15	74	1119	EREG,PDGFRA,ACTA2,TLR7,HMOX1,CHI3L1,ADA,S100A8,ADORA2B,S100A9,S100A12,FCGR2B,PIK3CG,CCL2,FGF7,CCR1,CCL4,CCL5,CCL7,CCL8,CCL11,GPNMB,CCL18,CCL20,FGR,VAV1,COL3A1,GPR65,LMCD1,MAP3K8,FPR1,ICAM1,APOE,AREG,IGF1,PYCARD,IL1RN,MARCO,IL6,RASSF2,RIPK2,PTPN22,DCN,HPSE,ZEB2,NOD2,CD84,PTPRC,TRAT1,ACKR3,C3,C5AR1,RAC2,DOCK2,CASP1,GPR183,NUPR1,LEP,LGALS1,EDNRA,THBS1,CD14,TIMP2,CD28,CD86,CD36,TLR1,TLR2,TLR4,CD44,TR…
GO: Biological Process	GO:0051251	positive regulation of lymphocyte activation			2.176e-17	1.365e-13	8.693e-16	8.103e-15	41	371	HLA-DMA,HLA-DPA1,HLA-DPB1,LILRB2,CLEC7A,ADA,CCR2,TYROBP,AIF1,CCL2,CCL5,VAV1,ANXA1,MAP3K8,IGF1,PYCARD,IGKC,IGLC1,IL6,IL7R,RIPK2,PTPN22,LILRB1,NOD2,PTPRC,BTK,LILRB4,GPR183,LEP,LGALS1,NLRP3,CORO1A,EGR3,CD28,CD86,CD38,TLR4,DUSP10,TRBC1,LYN,NCKAP1L
GO: Biological Process	GO:0030097	hemopoiesis			2.224e-17	1.395e-13	8.828e-16	8.228e-15	70	1018	CEBPB,HLA-DMA,PDGFRA,LILRB2,CLEC5A,TCIRG1,EVI2B,ACTN1,ADA,CCR2,TYROBP,FBN1,FCER1G,FCGR2B,AHR,CCR1,CCL5,GPR171,CCL20,MERTK,PLEK,MMP9,VAV1,FLI1,ANXA1,IRF8,DOCK10,PPARG,CR1,FAS,RSAD2,IL6,IL7R,SLAMF8,IL10,INHBA,RASSF2,RIPK2,PTPN22,ITGA4,ITGAM,LILRB1,ITK,STK4,CCN4,PTPRC,BTK,LILRB4,DOCK2,SH2B3,GPR183,LEP,LGALS1,NLRP3,LGALS3,MFAP5,THBS1,EGR3,CD28,CD86,LOX,TLR2,TLR4,CD44,TREM2,DUSP10,TNFAIP3,LYN,HCLS1,NC…
GO: Biological Process	GO:0002688	regulation of leukocyte chemotaxis			2.589e-17	1.624e-13	1.021e-15	9.521e-15	25	123	CCR2,AIF1,CCL2,CCR1,CCL4,CCL5,CCL7,MPP1,SELL,IL6,CXCL8,CXCR2,SLAMF8,LGMN,NOD2,C3AR1,C5AR1,RAC2,PLA2G7,EDNRA,THBS1,SERPINE1,GREM1,LYN,NCKAP1L
GO: Biological Process	GO:0006959	humoral immune response			2.639e-17	1.655e-13	1.035e-15	9.643e-15	41	373	CFH,HLA-DMA,HLA-DQB1,VSIG4,CCR2,S100A8,S100A9,S100A12,FCGR2B,FCN1,CXCL9,CCL2,RGCC,PPBP,CR1,JCHAIN,IGKC,IGLC1,IL6,CXCL8,IL10,NOD2,CFD,PTPRC,C1QA,C1QB,C1R,C1S,C3,C3AR1,C5AR1,GPR183,CXCL2,CXCL3,RNASE2,RNASE6,CD28,TREM2,TREM1,TRBC1,LYZ
GO: Biological Process	GO:0002520	immune system development			2.984e-17	1.871e-13	1.162e-15	1.083e-14	74	1127	CEBPB,HLA-DMA,PDGFRA,LILRB2,CLEC5A,TCIRG1,EVI2B,ACTN1,ADA,CCR2,TYROBP,FBN1,CLC,FCER1G,FCGR2B,AHR,CCR1,CCL5,GPR171,CCL20,MERTK,PLEK,MMP9,VAV1,FLI1,ANXA1,IRF8,DOCK10,SAMHD1,PPARG,CR1,FAS,RSAD2,IL6,IL7R,SLAMF8,IL10,INHBA,RASSF2,RIPK2,PTPN22,ITGA4,ITGAM,LILRB1,ITK,STK4,CCN4,PTPRC,BTK,C3AR1,LILRB4,DOCK2,SH2B3,GPR183,LEP,LGALS1,NLRP3,LGALS3,MFAP5,THBS1,EGR3,CD28,CD86,LOX,TLR2,TLR4,CD44,TREM2,IRAK3,DUSP…
GO: Biological Process	GO:0002768	immune response-regulating cell surface receptor signaling pathway			5.063e-17	3.176e-13	1.96e-15	1.827e-14	48	519	HLA-DPA1,HLA-DPB1,HLA-DQB1,LILRB2,CD300A,HLA-DRA,HLA-DRB4,ADA,FCER1G,FCGR1B,FCGR2A,FCGR2B,FCN1,MICB,LPXN,FGR,CLEC10A,MNDA,VAV1,THEMIS2,LAT2,FPR1,FPR3,CR1,IGKC,IGLC1,FYB1,RIPK2,PTPN22,LILRB1,ITK,PTPRC,TRAT1,CLEC4A,BTK,C3AR1,C5AR1,LILRB4,LCP2,ARPC1B,LGALS3,CD28,CD38,TLR2,TRBC1,LYN,HCK,NCKAP1L
GO: Biological Process	GO:1902105	regulation of leukocyte differentiation			5.707e-17	3.579e-13	2.196e-15	2.047e-14	38	326	CEBPB,HLA-DMA,LILRB2,EVI2B,ADA,CCR2,TYROBP,FBN1,FCGR2B,CCR1,CCL5,CCL20,ANXA1,CR1,FAS,IL6,IL7R,SLAMF8,INHBA,RASSF2,RIPK2,LILRB1,PTPRC,BTK,LILRB4,LGALS1,NLRP3,LGALS3,EGR3,CD28,CD86,TLR4,CD44,TREM2,DUSP10,LYN,HCLS1,NCKAP1L
GO: Biological Process	GO:0043085	positive regulation of catalytic activity			5.792e-17	3.632e-13	2.215e-15	2.065e-14	91	1611	EREG,PDGFRA,CD300A,CORO1C,CLEC7A,CHI3L1,ADCY7,S100A8,ADORA2B,S100A9,S100A12,FBLN1,PIK3CG,HRH1,CCL2,CCL4,CCL5,CCL7,CCL8,CCL11,GPNMB,CCL18,CCL20,FGR,PLEK,AIM2,ALOX5,ALOX5AP,VAV1,GPR65,FN1,MAP3K8,FPR1,FPR3,ICAM1,RGCC,GMFG,DOCK10,APOC1,APOE,PPARG,CR1,FAS,ARHGDIB,IGF1,CCN1,PYCARD,CTSD,IL1RN,ADAP2,CXCR2,LGMN,RASSF2,RIPK2,NCF2,NCF4,PTAFR,ITGAM,ITGB2,ZEB2,ITK,NOD2,STK4,PTPRC,GM2A,C3AR1,GNA15,ARHGAP25,C5A…
GO: Biological Process	GO:0150076	neuroinflammatory response			6.128e-17	3.843e-13	2.329e-15	2.171e-14	21	82	TLR7,TYROBP,AIF1,MMP9,PPARG,IGF1,IL6,ITGAM,ITGB2,PTGS2,PTPRC,C1QA,C5AR1,IL33,GRN,NUPR1,TLR1,TLR2,TLR4,TREM2,TNFRSF1B
GO: Biological Process	GO:0070372	regulation of ERK1 and ERK2 cascade			6.277e-17	3.937e-13	2.372e-15	2.211e-14	39	345	PDGFRA,ACTA2,CHI3L1,FBLN1,CCL2,CCR1,CCL4,CCL5,CCL7,CCL8,CCL11,GPNMB,CCL18,CCL20,FN1,ICAM1,APOE,IGF1,CCN1,PYCARD,MARCO,IL6,RIPK2,PTPN22,NOD2,PTPRC,ACKR3,C3,C5AR1,GPR183,EMILIN1,EDNRA,CD36,TLR2,TLR4,CD44,TREM2,DUSP10,LYN
GO: Biological Process	GO:0002695	negative regulation of leukocyte activation			6.657e-17	4.176e-13	2.5e-15	2.331e-14	30	196	CEBPB,LILRB2,CD300A,VSIG4,HMOX1,CCR2,TYROBP,FCGR2B,GPNMB,MERTK,MNDA,ANXA1,PPARG,FAS,MILR1,IL10,INHBA,PTPN22,SAMSN1,LILRB1,CD84,PTPRC,BTK,LST1,GRN,LGALS3,CD86,CD44,TNFAIP3,LYN
GO: Biological Process	GO:0051247	positive regulation of protein metabolic process			7.154e-17	4.487e-13	2.671e-15	2.49e-14	100	1882	EREG,PDGFRA,LILRB2,CD300A,ACTA2,CLEC7A,TLR7,HMOX1,CHI3L1,ADCY7,CCR2,S100A8,ADORA2B,S100A9,TYROBP,S100A12,FBLN1,FCGR2B,PIK3CG,SPON1,AIF1,CCL2,FGF7,CCR1,CCL4,CCL5,PLAUR,CCL7,CCL8,CCL11,GPNMB,CCL18,CCL20,MMP9,AIM2,FN1,MAP3K8,FPR1,ICAM1,RGCC,BAG2,APOE,PPARG,CR1,FAS,AREG,ABCG1,IGF1,CCN1,PYCARD,CTSD,IL1RN,MARCO,IL6,SOAT1,CYBB,LGMN,INHBA,RASSF2,RIPK2,PTPN22,PTAFR,PTGS2,ZEB2,NOD2,CD84,STK4,PTPRC,ACKR3,C3…
GO: Biological Process	GO:0043902	positive regulation of multi-organism process			7.684e-17	4.819e-13	2.852e-15	2.658e-14	50	567	EREG,CD300A,CLEC7A,TLR7,LY96,S100A8,S100A9,COLEC12,FCER1G,FCN1,MICB,CCL5,MMP2,CLEC10A,MMP12,AIM2,LY86,MNDA,VAV1,APOE,RSAD2,PYCARD,CTSL,MARCO,CTSS,LGMN,INHBA,RIPK2,PTPN22,PTAFR,ITGAM,ITGB2,NOD2,CLEC4A,BTK,GRN,LGALS1,CD14,CD28,CD86,CD36,TLR1,TLR2,TLR4,CRTAM,LHFPL2,IRAK3,TNFAIP3,LYN,HCK
GO: Biological Process	GO:0050870	positive regulation of T cell activation			9.233e-17	5.791e-13	3.406e-15	3.175e-14	32	229	HLA-DMA,HLA-DPA1,HLA-DPB1,LILRB2,ADA,CCR2,AIF1,CCL2,CCL5,VAV1,ANXA1,MAP3K8,IGF1,PYCARD,IL6,IL7R,RIPK2,PTPN22,LILRB1,NOD2,PTPRC,LILRB4,LEP,LGALS1,NLRP3,CORO1A,EGR3,CD28,CD86,DUSP10,LYN,NCKAP1L
GO: Biological Process	GO:0032635	interleukin-6 production			9.881e-17	6.197e-13	3.624e-15	3.378e-14	29	184	EREG,CEBPB,LILRB2,CLEC7A,TLR7,TWIST1,ADORA2B,TYROBP,FCER1G,AIF1,PYCARD,IL1RN,IL6,IL10,RIPK2,PTPN22,PTAFR,NOD2,CD84,IL33,LEP,CD36,TLR1,TLR2,TLR4,TREM2,IRAK3,TNFAIP3,NCKAP1L
GO: Biological Process	GO:1901701	cellular response to oxygen-containing compound			1.771e-16	1.111e-12	6.457e-15	6.019e-14	79	1300	ABCA1,CEBPB,PDGFRA,LILRB2,SERPINF1,CLEC7A,TCIRG1,LY96,ADCY7,COLEC12,FBN1,FCGR2B,PIK3CG,UCP2,CXCL9,AHR,HRH1,AIF1,CCL2,CCL5,CCL7,CCR5,MMP2,MMP9,LY86,COL1A1,COL1A2,COL3A1,MRC1,COL5A2,COL16A1,ANXA1,FOLR2,ICAM1,IRF8,PPARG,PPBP,AQP9,IGF1,PYCARD,IL1RN,IL6,CXCL8,CYBB,IL10,LGMN,MYO5A,INHBA,RIPK2,PTPN22,ITGA4,PTAFR,PTGDR,LILRB1,PTGS2,NOD2,CD84,PTPRE,BTK,GNA15,RAB31,CASP1,CXCL2,CXCL3,LEP,LGALS1,NLRP3,THBS1,…
GO: Biological Process	GO:0032675	regulation of interleukin-6 production			1.936e-16	1.214e-12	7.02e-15	6.544e-14	28	174	EREG,CEBPB,LILRB2,CLEC7A,TLR7,TWIST1,ADORA2B,TYROBP,FCER1G,AIF1,PYCARD,IL1RN,IL6,IL10,RIPK2,PTPN22,PTAFR,NOD2,CD84,IL33,CD36,TLR1,TLR2,TLR4,TREM2,IRAK3,TNFAIP3,NCKAP1L
GO: Biological Process	GO:0048534	hematopoietic or lymphoid organ development			2.335e-16	1.465e-12	8.417e-15	7.846e-14	70	1065	CEBPB,HLA-DMA,PDGFRA,LILRB2,CLEC5A,TCIRG1,EVI2B,ACTN1,ADA,CCR2,TYROBP,FBN1,FCER1G,FCGR2B,AHR,CCR1,CCL5,GPR171,CCL20,MERTK,PLEK,MMP9,VAV1,FLI1,ANXA1,IRF8,DOCK10,PPARG,CR1,FAS,RSAD2,IL6,IL7R,SLAMF8,IL10,INHBA,RASSF2,RIPK2,PTPN22,ITGA4,ITGAM,LILRB1,ITK,STK4,CCN4,PTPRC,BTK,LILRB4,DOCK2,SH2B3,GPR183,LEP,LGALS1,NLRP3,LGALS3,MFAP5,THBS1,EGR3,CD28,CD86,LOX,TLR2,TLR4,CD44,TREM2,DUSP10,TNFAIP3,LYN,HCLS1,NC…
GO: Biological Process	GO:0045576	mast cell activation			2.518e-16	1.579e-12	9.025e-15	8.412e-14	20	77	CD300A,HMOX1,ADGRE2,ADORA2B,S100A12,FCER1G,FCGR2B,PIK3CG,FGR,LAT2,MILR1,FYB1,CD84,PTPRE,BTK,RAC2,LCP2,TLR4,CD48,LYN
GO: Biological Process	GO:0051046	regulation of secretion			2.571e-16	1.613e-12	9.163e-15	8.541e-14	66	964	CLEC5A,CD300A,TCIRG1,HMOX1,ADGRE2,ADA,TWIST1,CCR2,S100A8,ADORA2B,S100A9,FBLN1,FCER1G,FCGR2B,FCN1,UCP2,AIF1,CCL5,FGR,MMP12,AIM2,FN1,ANXA1,RGCC,APOE,PPARG,POSTN,ABCG1,RSAD2,IGF1,SRGN,PYCARD,IL1RN,IL6,IL10,MYO5A,INHBA,RIPK2,PTPN22,PTAFR,ITGAM,ITGB2,LILRB1,NOD2,CD84,CCN4,IL33,RAC2,CASP1,OAS2,LEP,NLRP3,LGALS3,MCTP1,CD14,CD33,CD36,CD38,TLR1,TLR2,TLR4,CRTAM,TREM2,TNFAIP3,TNFRSF1B,LYN
GO: Biological Process	GO:0070371	ERK1 and ERK2 cascade			3.241e-16	2.032e-12	1.148e-14	1.07e-13	39	362	PDGFRA,ACTA2,CHI3L1,FBLN1,CCL2,CCR1,CCL4,CCL5,CCL7,CCL8,CCL11,GPNMB,CCL18,CCL20,FN1,ICAM1,APOE,IGF1,CCN1,PYCARD,MARCO,IL6,RIPK2,PTPN22,NOD2,PTPRC,ACKR3,C3,C5AR1,GPR183,EMILIN1,EDNRA,CD36,TLR2,TLR4,CD44,TREM2,DUSP10,LYN
GO: Biological Process	GO:1990868	response to chemokine			3.667e-16	2.3e-12	1.285e-14	1.198e-13	22	100	CCR2,CXCL9,CCL2,CCR1,CCL4,CCL5,CCL7,CCR5,CCL8,CCL11,CCL18,CCL20,PPBP,CXCL8,CXCR2,ACKR3,SH2B3,CCRL2,CXCL2,CXCL3,LOX,TREM2
GO: Biological Process	GO:1990869	cellular response to chemokine			3.667e-16	2.3e-12	1.285e-14	1.198e-13	22	100	CCR2,CXCL9,CCL2,CCR1,CCL4,CCL5,CCL7,CCR5,CCL8,CCL11,CCL18,CCL20,PPBP,CXCL8,CXCR2,ACKR3,SH2B3,CCRL2,CXCL2,CXCL3,LOX,TREM2
GO: Biological Process	GO:0070098	chemokine-mediated signaling pathway			3.775e-16	2.368e-12	1.316e-14	1.226e-13	21	89	CCR2,CXCL9,CCL2,CCR1,CCL4,CCL5,CCL7,CCR5,CCL8,CCL11,CCL18,CCL20,PPBP,CXCL8,CXCR2,ACKR3,SH2B3,CCRL2,CXCL2,CXCL3,TREM2
GO: Biological Process	GO:0019220	regulation of phosphate metabolic process			4.215e-16	2.644e-12	1.461e-14	1.362e-13	102	1994	EREG,PDGFRA,LILRB2,CD300A,CORO1C,ACTA2,TLR7,CHI3L1,ADCY7,FABP4,TWIST1,ADORA2B,S100A12,FBLN1,FCGR2B,PIK3CG,AHR,HRH1,AIF1,CCL2,FGF7,CCR1,CCL4,CCL5,PLAUR,CCL7,CCL8,CCL11,GPNMB,CCL18,HSD11B1,CCL20,FGR,PLEK,MMP9,SFRP4,FN1,MAP3K8,FPR1,ICAM1,RGCC,GMFG,APOC1,APOE,FAS,AREG,IGF1,CCN1,PYCARD,VCAN,IL1RN,MARCO,IL6,PHACTR1,SLAMF8,INHBA,RASSF2,RIPK2,PTPN22,PTAFR,SAMSN1,ITGB2,PTGS2,ZEB2,NOD2,CD84,STK4,SRPX2,PTPR…
GO: Biological Process	GO:0051174	regulation of phosphorus metabolic process			4.359e-16	2.734e-12	1.502e-14	1.4e-13	102	1995	EREG,PDGFRA,LILRB2,CD300A,CORO1C,ACTA2,TLR7,CHI3L1,ADCY7,FABP4,TWIST1,ADORA2B,S100A12,FBLN1,FCGR2B,PIK3CG,AHR,HRH1,AIF1,CCL2,FGF7,CCR1,CCL4,CCL5,PLAUR,CCL7,CCL8,CCL11,GPNMB,CCL18,HSD11B1,CCL20,FGR,PLEK,MMP9,SFRP4,FN1,MAP3K8,FPR1,ICAM1,RGCC,GMFG,APOC1,APOE,FAS,AREG,IGF1,CCN1,PYCARD,VCAN,IL1RN,MARCO,IL6,PHACTR1,SLAMF8,INHBA,RASSF2,RIPK2,PTPN22,PTAFR,SAMSN1,ITGB2,PTGS2,ZEB2,NOD2,CD84,STK4,SRPX2,PTPR…
GO: Biological Process	GO:0002429	immune response-activating cell surface receptor signaling pathway			4.548e-16	2.852e-12	1.559e-14	1.453e-13	45	485	HLA-DPA1,HLA-DPB1,HLA-DQB1,CD300A,HLA-DRA,HLA-DRB4,ADA,FCER1G,FCGR2A,FCGR2B,FCN1,MICB,LPXN,FGR,CLEC10A,MNDA,VAV1,THEMIS2,LAT2,FPR1,FPR3,CR1,IGKC,IGLC1,FYB1,RIPK2,PTPN22,ITK,PTPRC,TRAT1,CLEC4A,BTK,C3AR1,C5AR1,LILRB4,LCP2,ARPC1B,LGALS3,CD28,CD38,TLR2,TRBC1,LYN,HCK,NCKAP1L
GO: Biological Process	GO:1903557	positive regulation of tumor necrosis factor superfamily cytokine production			4.594e-16	2.881e-12	1.566e-14	1.46e-13	22	101	CLEC7A,LY96,TWIST1,CCR2,TYROBP,FCER1G,CCL2,PYCARD,CYBB,RIPK2,PTAFR,NOD2,CD84,PTPRC,LEP,THBS1,CD14,CD86,CD36,TLR1,TLR2,TLR4
GO: Biological Process	GO:0042129	regulation of T cell proliferation			7.454e-16	4.675e-12	2.527e-14	2.356e-13	28	183	CEBPB,HLA-DPA1,HLA-DPB1,LILRB2,VSIG4,CCR2,CLC,AIF1,CCL5,GPNMB,ANXA1,IGF1,PYCARD,IL6,IL10,RIPK2,PTPN22,LILRB1,PTPRC,RAC2,LEP,LGALS3,CORO1A,CD28,CD86,CD44,TNFRSF1B,NCKAP1L
GO: Biological Process	GO:0070374	positive regulation of ERK1 and ERK2 cascade			7.619e-16	4.779e-12	2.569e-14	2.395e-13	32	246	PDGFRA,ACTA2,CHI3L1,CCL2,CCR1,CCL4,CCL5,CCL7,CCL8,CCL11,GPNMB,CCL18,CCL20,ICAM1,APOE,PYCARD,MARCO,IL6,RIPK2,PTPN22,NOD2,PTPRC,ACKR3,C3,C5AR1,GPR183,EDNRA,CD36,TLR2,TLR4,CD44,TREM2
GO: Biological Process	GO:0048646	anatomical structure formation involved in morphogenesis			8.51e-16	5.338e-12	2.854e-14	2.661e-13	80	1365	EREG,HLA-DMA,PDGFRA,SERPINF1,TCIRG1,ACTN1,HMOX1,CHI3L1,ADA,TWIST1,CCR2,TYROBP,FAP,PIK3CG,CXCL9,AHR,CCL2,CCL5,CCL11,GPNMB,MMP2,ALDH1A3,MMP9,COL1A1,COL5A1,COL5A2,COL8A1,COL8A2,COL15A1,FN1,ANXA1,RGCC,PPARG,CCN1,IL1RN,IL6,CXCL8,CXCR2,CYBB,IL10,INHBA,GATA6,ITGA4,DCN,HPSE,ITGAX,ITGB2,PTGIS,PTGS2,ZEB2,NRP2,STK4,SRPX2,SULF1,ACKR3,SCG2,C3,C3AR1,C5AR1,PLXDC1,GRN,ADAM12,EMILIN1,LEP,EDNRA,LGALS3,ZFPM2,TGFBI,…
GO: Biological Process	GO:0002791	regulation of peptide secretion			1.242e-15	7.789e-12	4.143e-14	3.862e-13	49	585	CLEC5A,TCIRG1,TWIST1,S100A8,S100A9,FBLN1,FCGR2B,FCN1,UCP2,AIF1,CCL5,FGR,MMP12,AIM2,FN1,ANXA1,RGCC,APOE,PPARG,POSTN,ABCG1,RSAD2,IGF1,SRGN,PYCARD,IL6,IL10,RIPK2,PTPN22,LILRB1,NOD2,CD84,CCN4,IL33,CASP1,LEP,NLRP3,CD14,CD33,CD36,CD38,TLR1,TLR2,TLR4,CRTAM,TREM2,TNFAIP3,TNFRSF1B,LYN
GO: Biological Process	GO:0051336	regulation of hydrolase activity			1.462e-15	9.167e-12	4.85e-14	4.521e-13	82	1435	PDGFRA,CD300A,CORO1C,SERPINF1,CLEC7A,S100A8,S100A9,FBLN1,AHR,HRH1,CCL2,CCL4,CCL5,PLAUR,CCL7,CCL8,CCL11,CCL18,CCL20,PLEK,MMP9,PLN,AIM2,VAV1,COL6A3,GPR65,FN1,ANXA1,FPR1,FPR3,ICAM1,DOCK10,APOC1,PPARG,CR1,FAS,ARHGDIB,IGF1,CCN1,PYCARD,VCAN,LAMP3,CSTA,CSTB,CTSD,IL6,ADAP2,CXCR2,PHACTR1,LGMN,NAIP,RIPK2,PTAFR,PTGS2,ITK,PTPRC,GM2A,C3,C3AR1,GNA15,ARHGAP25,C5AR1,DOCK2,RARRES1,CASP1,OAS2,GRN,RGS1,RGS2,EDNRA,N…
GO: Biological Process	GO:1903530	regulation of secretion by cell			1.571e-15	9.856e-12	5.187e-14	4.835e-13	62	898	CLEC5A,CD300A,TCIRG1,HMOX1,ADGRE2,TWIST1,CCR2,ADORA2B,FBLN1,FCER1G,FCGR2B,FCN1,UCP2,AIF1,CCL5,FGR,MMP12,AIM2,FN1,ANXA1,RGCC,APOE,PPARG,POSTN,ABCG1,RSAD2,IGF1,SRGN,PYCARD,IL1RN,IL6,IL10,MYO5A,INHBA,RIPK2,PTPN22,PTAFR,ITGAM,ITGB2,LILRB1,NOD2,CD84,CCN4,IL33,RAC2,CASP1,LEP,NLRP3,LGALS3,MCTP1,CD14,CD33,CD36,CD38,TLR1,TLR2,TLR4,CRTAM,TREM2,TNFAIP3,TNFRSF1B,LYN
GO: Biological Process	GO:0071346	cellular response to interferon-gamma			1.751e-15	1.098e-11	5.749e-14	5.359e-13	28	189	HLA-DPA1,HLA-DPB1,HLA-DQB1,HLA-DRA,HLA-DRB4,FCGR1B,AIF1,CCL2,CCL4,CCL5,CCL7,CCL8,CCL11,CCL18,CCL20,MRC1,ICAM1,IRF8,PPARG,GBP2,PTAFR,CAPG,CASP1,OAS2,TLR2,TLR4,CD44,HCK
GO: Biological Process	GO:0002460	adaptive immune response based on somatic recombination of immune receptors built from immunoglobulin superfamily domains			1.87e-15	1.173e-11	6.11e-14	5.695e-13	40	401	HLA-DMA,HLA-DQB1,TCIRG1,ADA,CCR2,CLC,FCER1G,FCGR2B,MICB,CCL20,ANXA1,ICAM1,CR1,FAS,RSAD2,IGKC,IGLC1,IL6,IL7R,IL10,RIPK2,LILRB1,NOD2,PTPRC,BTK,C1QA,C1QB,C1R,C1S,C3,C3AR1,IL33,NLRP3,CD28,GZMB,TLR4,CRTAM,TNFAIP3,TNFRSF1B,TRBC1
GO: Biological Process	GO:0010562	positive regulation of phosphorus metabolic process			2.261e-15	1.418e-11	7.311e-14	6.815e-13	76	1277	EREG,PDGFRA,LILRB2,CD300A,ACTA2,CHI3L1,ADCY7,ADORA2B,S100A12,FCGR2B,PIK3CG,HRH1,AIF1,CCL2,FGF7,CCR1,CCL4,CCL5,PLAUR,CCL7,CCL8,CCL11,GPNMB,CCL18,CCL20,FGR,PLEK,MMP9,MAP3K8,FPR1,ICAM1,RGCC,APOE,FAS,AREG,IGF1,CCN1,PYCARD,IL1RN,MARCO,IL6,INHBA,RASSF2,RIPK2,PTPN22,PTAFR,PTGS2,ZEB2,NOD2,CD84,STK4,PTPRC,ACKR3,C3,C5AR1,TIGAR,NIBAN1,RAP2B,GPR183,LCP2,NUPR1,LEP,EDNRA,THBS1,TIMP2,CD33,CD36,TLR1,TLR2,TLR4,CD…
GO: Biological Process	GO:0045937	positive regulation of phosphate metabolic process			2.261e-15	1.418e-11	7.311e-14	6.815e-13	76	1277	EREG,PDGFRA,LILRB2,CD300A,ACTA2,CHI3L1,ADCY7,ADORA2B,S100A12,FCGR2B,PIK3CG,HRH1,AIF1,CCL2,FGF7,CCR1,CCL4,CCL5,PLAUR,CCL7,CCL8,CCL11,GPNMB,CCL18,CCL20,FGR,PLEK,MMP9,MAP3K8,FPR1,ICAM1,RGCC,APOE,FAS,AREG,IGF1,CCN1,PYCARD,IL1RN,MARCO,IL6,INHBA,RASSF2,RIPK2,PTPN22,PTAFR,PTGS2,ZEB2,NOD2,CD84,STK4,PTPRC,ACKR3,C3,C5AR1,TIGAR,NIBAN1,RAP2B,GPR183,LCP2,NUPR1,LEP,EDNRA,THBS1,TIMP2,CD33,CD36,TLR1,TLR2,TLR4,CD…
GO: Biological Process	GO:0023014	signal transduction by protein phosphorylation			2.337e-15	1.466e-11	7.515e-14	7.005e-13	68	1061	EREG,PDGFRA,CD300A,ACTA2,CHI3L1,ADORA2B,S100A12,FBLN1,FCGR2B,PIK3CG,CCL2,FGF7,CCR1,CCL4,CCL5,CCL7,CCR5,CCL8,CCL11,GPNMB,CCL18,CCL20,SFRP4,FN1,MAP3K8,FPR1,ICAM1,APOE,FAS,AREG,IGF1,CSF2RA,CSF2RB,CCN1,PYCARD,IL1RN,MARCO,IL6,INHBA,RASSF2,RIPK2,PTPN22,ZEB2,NOD2,CD84,STK4,PTPRC,ACKR3,SCG2,C3,C5AR1,SH2B3,GPR183,EMILIN1,RGS2,LEP,EDNRA,THBS1,TIMP2,CD36,TLR2,TLR4,CD44,TREM2,IRAK3,DUSP10,GREM1,LYN
GO: Biological Process	GO:0030098	lymphocyte differentiation			2.409e-15	1.511e-11	7.709e-14	7.185e-13	40	404	HLA-DMA,LILRB2,TCIRG1,ADA,CCR2,FCER1G,FCGR2B,AHR,CCL20,MERTK,VAV1,ANXA1,DOCK10,CR1,FAS,RSAD2,IL6,IL7R,SLAMF8,IL10,INHBA,RIPK2,PTPN22,ITGA4,ITK,PTPRC,BTK,LILRB4,DOCK2,GPR183,LEP,LGALS1,NLRP3,EGR3,CD28,CD86,CD44,DUSP10,TNFAIP3,NCKAP1L
GO: Biological Process	GO:0043408	regulation of MAPK cascade			2.533e-15	1.589e-11	8.065e-14	7.517e-13	60	857	PDGFRA,CD300A,ACTA2,CHI3L1,ADORA2B,S100A12,FBLN1,FCGR2B,PIK3CG,CCL2,CCR1,CCL4,CCL5,CCL7,CCL8,CCL11,GPNMB,CCL18,CCL20,SFRP4,FN1,MAP3K8,FPR1,ICAM1,APOE,FAS,IGF1,CCN1,PYCARD,IL1RN,MARCO,IL6,INHBA,RASSF2,RIPK2,PTPN22,ZEB2,NOD2,CD84,PTPRC,ACKR3,C3,C5AR1,SH2B3,GPR183,EMILIN1,RGS2,LEP,EDNRA,THBS1,TIMP2,CD36,TLR2,TLR4,CD44,TREM2,IRAK3,DUSP10,GREM1,LYN
GO: Biological Process	GO:0002218	activation of innate immune response			3.179e-15	1.994e-11	1.007e-13	9.387e-13	36	330	CD300A,CLEC7A,TLR7,LY96,S100A8,S100A9,COLEC12,FCER1G,FCN1,CLEC10A,AIM2,MNDA,RSAD2,PYCARD,CTSL,MARCO,CTSS,LGMN,RIPK2,PTPN22,PTAFR,ITGAM,ITGB2,NOD2,CLEC4A,BTK,CD14,CD86,CD36,TLR1,TLR2,TLR4,IRAK3,TNFAIP3,LYN,HCK
GO: Biological Process	GO:0002221	pattern recognition receptor signaling pathway			3.201e-15	2.008e-11	1.009e-13	9.405e-13	29	209	CD300A,CLEC7A,TLR7,LY96,S100A8,S100A9,COLEC12,FCN1,RSAD2,CTSL,MARCO,CTSS,LGMN,RIPK2,PTPN22,PTAFR,ITGAM,ITGB2,NOD2,BTK,CD14,CD86,CD36,TLR1,TLR2,TLR4,IRAK3,TNFAIP3,LYN
GO: Biological Process	GO:0032760	positive regulation of tumor necrosis factor production			3.811e-15	2.39e-11	1.195e-13	1.114e-12	21	99	CLEC7A,LY96,TWIST1,CCR2,TYROBP,FCER1G,CCL2,PYCARD,CYBB,RIPK2,PTAFR,NOD2,CD84,PTPRC,LEP,THBS1,CD14,CD36,TLR1,TLR2,TLR4
GO: Biological Process	GO:0006897	endocytosis			4.478e-15	2.808e-11	1.397e-13	1.302e-12	56	769	ABCA1,CD300A,CLEC7A,HMOX1,CD163,COLEC12,FCER1G,FCGR1B,FCGR2B,FCN1,PIK3CG,AIF1,BIN2,EEA1,CLEC10A,MRC1,SFRP4,FOLR2,APOC1,APOE,PPARG,MSR1,PYCARD,JCHAIN,IGKC,IGLC1,MARCO,SOAT1,CXCL8,CXCR2,IL10RA,ITGA4,ITGAM,ITGB2,LILRB1,TRAT1,ACKR3,C3,ARHGAP25,NPC1,DOCK2,RAB31,GRN,OLR1,LGALS3,THBS1,LIPA,MCTP1,CD14,CD36,SERPINE1,TREM2,GREM1,TRBC1,M6PR,NCKAP1L
GO: Biological Process	GO:0000165	MAPK cascade			4.57e-15	2.866e-11	1.419e-13	1.323e-12	67	1049	EREG,PDGFRA,CD300A,ACTA2,CHI3L1,ADORA2B,S100A12,FBLN1,FCGR2B,PIK3CG,CCL2,FGF7,CCR1,CCL4,CCL5,CCL7,CCR5,CCL8,CCL11,GPNMB,CCL18,CCL20,SFRP4,FN1,MAP3K8,FPR1,ICAM1,APOE,FAS,AREG,IGF1,CSF2RA,CSF2RB,CCN1,PYCARD,IL1RN,MARCO,IL6,INHBA,RASSF2,RIPK2,PTPN22,ZEB2,NOD2,CD84,PTPRC,ACKR3,SCG2,C3,C5AR1,SH2B3,GPR183,EMILIN1,RGS2,LEP,EDNRA,THBS1,TIMP2,CD36,TLR2,TLR4,CD44,TREM2,IRAK3,DUSP10,GREM1,LYN
GO: Biological Process	GO:0002224	toll-like receptor signaling pathway			6.631e-15	4.159e-11	2.049e-13	1.91e-12	25	154	CD300A,TLR7,LY96,S100A8,S100A9,COLEC12,RSAD2,CTSL,CTSS,LGMN,RIPK2,PTPN22,ITGAM,ITGB2,NOD2,BTK,CD14,CD86,CD36,TLR1,TLR2,TLR4,IRAK3,TNFAIP3,LYN
GO: Biological Process	GO:0050708	regulation of protein secretion			7.428e-15	4.659e-11	2.284e-13	2.129e-12	46	545	CLEC5A,TCIRG1,TWIST1,FBLN1,FCGR2B,FCN1,UCP2,AIF1,CCL5,FGR,MMP12,AIM2,FN1,ANXA1,RGCC,APOE,POSTN,ABCG1,RSAD2,IGF1,SRGN,PYCARD,IL6,IL10,RIPK2,PTPN22,LILRB1,NOD2,CD84,CCN4,IL33,CASP1,LEP,NLRP3,CD14,CD33,CD36,CD38,TLR1,TLR2,TLR4,CRTAM,TREM2,TNFAIP3,TNFRSF1B,LYN
GO: Biological Process	GO:0032270	positive regulation of cellular protein metabolic process			7.541e-15	4.73e-11	2.307e-13	2.151e-12	92	1774	EREG,PDGFRA,LILRB2,CD300A,ACTA2,CLEC7A,CHI3L1,ADCY7,S100A8,ADORA2B,S100A9,S100A12,FBLN1,FCGR2B,PIK3CG,SPON1,AIF1,CCL2,FGF7,CCR1,CCL4,CCL5,PLAUR,CCL7,CCL8,CCL11,GPNMB,CCL18,CCL20,MMP9,AIM2,FN1,MAP3K8,FPR1,ICAM1,RGCC,BAG2,APOE,PPARG,CR1,FAS,AREG,IGF1,CCN1,PYCARD,CTSD,IL1RN,MARCO,IL6,LGMN,INHBA,RASSF2,RIPK2,PTPN22,PTAFR,PTGS2,ZEB2,NOD2,CD84,STK4,PTPRC,ACKR3,C3,C5AR1,IL33,NIBAN1,RAP2B,CASP1,GRN,GPR18…
GO: Biological Process	GO:0010324	membrane invagination			7.774e-15	4.876e-11	2.359e-13	2.199e-12	56	779	ABCA1,CD300A,CLEC7A,HMOX1,CD163,COLEC12,FCER1G,FCGR1B,FCGR2B,FCN1,PIK3CG,AIF1,BIN2,EEA1,CLEC10A,MRC1,SFRP4,FOLR2,APOC1,APOE,PPARG,MSR1,PYCARD,JCHAIN,IGKC,IGLC1,MARCO,SOAT1,CXCL8,CXCR2,IL10RA,ITGA4,ITGAM,ITGB2,LILRB1,TRAT1,ACKR3,C3,ARHGAP25,NPC1,DOCK2,RAB31,GRN,OLR1,LGALS3,THBS1,LIPA,MCTP1,CD14,CD36,SERPINE1,TREM2,GREM1,TRBC1,M6PR,NCKAP1L
GO: Biological Process	GO:0001932	regulation of protein phosphorylation			7.787e-15	4.884e-11	2.359e-13	2.199e-12	87	1625	EREG,PDGFRA,CD300A,CORO1C,ACTA2,TLR7,CHI3L1,ADCY7,FABP4,TWIST1,ADORA2B,S100A12,FBLN1,FCGR2B,PIK3CG,AIF1,CCL2,FGF7,CCR1,CCL4,CCL5,PLAUR,CCL7,CCL8,CCL11,GPNMB,CCL18,CCL20,FGR,MMP9,SFRP4,FN1,MAP3K8,FPR1,ICAM1,RGCC,GMFG,APOE,FAS,AREG,IGF1,CCN1,PYCARD,IL1RN,MARCO,IL6,INHBA,RASSF2,RIPK2,PTPN22,SAMSN1,ITGB2,PTGS2,ZEB2,NOD2,CD84,STK4,PTPRC,ACKR3,C3,C5AR1,RAC2,NIBAN1,RAP2B,SH2B3,GPR183,LCP2,EMILIN1,RGS2,L…
GO: Biological Process	GO:0050777	negative regulation of immune response			8.306e-15	5.21e-11	2.505e-13	2.335e-12	26	170	CD300A,VSIG4,HMOX1,CCR2,FCGR2B,MMP12,COL3A1,ANXA1,SAMHD1,PPARG,CR1,IL7R,SLAMF8,IL10,SAMSN1,LILRB1,NOD2,CD84,PTPRC,IL33,GRN,LGALS3,IRAK3,DUSP10,TNFAIP3,LYN
GO: Biological Process	GO:0006900	vesicle budding from membrane			8.432e-15	5.289e-11	2.531e-13	2.359e-12	59	855	ABCA1,CD300A,CLEC7A,HMOX1,CD163,COLEC12,FCER1G,FCGR1B,FCGR2B,FCN1,PIK3CG,AIF1,BIN2,EEA1,CLEC10A,MRC1,SFRP4,FOLR2,APOC1,APOE,PPARG,AREG,MSR1,PYCARD,JCHAIN,IGKC,IGLC1,MARCO,CTSZ,SOAT1,CXCL8,CXCR2,IL10RA,ITGA4,ITGAM,ITGB2,LILRB1,SEC24D,TRAT1,ACKR3,C3,ARHGAP25,NPC1,DOCK2,RAB31,GRN,OLR1,LGALS3,THBS1,LIPA,MCTP1,CD14,CD36,SERPINE1,TREM2,GREM1,TRBC1,M6PR,NCKAP1L
GO: Biological Process	GO:0042325	regulation of phosphorylation			9.565e-15	5.999e-11	2.857e-13	2.663e-12	92	1781	EREG,PDGFRA,CD300A,CORO1C,ACTA2,TLR7,CHI3L1,ADCY7,FABP4,TWIST1,ADORA2B,S100A12,FBLN1,FCGR2B,PIK3CG,AIF1,CCL2,FGF7,CCR1,CCL4,CCL5,PLAUR,CCL7,CCL8,CCL11,GPNMB,CCL18,CCL20,FGR,MMP9,SFRP4,FN1,MAP3K8,FPR1,ICAM1,RGCC,GMFG,APOE,FAS,AREG,IGF1,CCN1,PYCARD,IL1RN,MARCO,IL6,PHACTR1,SLAMF8,INHBA,RASSF2,RIPK2,PTPN22,SAMSN1,ITGB2,PTGS2,ZEB2,NOD2,CD84,STK4,SRPX2,PTPRC,ACKR3,C3,C5AR1,RAC2,TIGAR,NIBAN1,RAP2B,SH2B3…
GO: Biological Process	GO:0045765	regulation of angiogenesis			9.658e-15	6.058e-11	2.871e-13	2.676e-12	40	421	SERPINF1,HMOX1,CHI3L1,TWIST1,CCR2,CCL2,CCL5,CCL11,GPNMB,MMP9,ANXA1,RGCC,PPARG,IL6,CXCL8,CXCR2,CYBB,IL10,GATA6,DCN,ITGAX,ITGB2,PTGIS,PTGS2,SRPX2,SULF1,C3,C3AR1,C5AR1,GRN,ADAM12,EMILIN1,LEP,LGALS3,THBS1,THBS2,CD36,SERPINE1,TNFAIP3,GREM1
GO: Biological Process	GO:0051094	positive regulation of developmental process			9.992e-15	6.267e-11	2.956e-13	2.755e-12	87	1632	CEBPB,HLA-DMA,PDGFRA,LILRB2,CORO1C,SERPINF1,CLEC7A,EVI2B,HMOX1,CHI3L1,ADA,TWIST1,CCR2,S100A9,TYROBP,BASP1,CXCL9,FGF7,CCR1,CCL5,CCL11,MMP9,COL1A1,SFRP4,FN1,ANXA1,RGCC,APOE,PPARG,MSR1,IGF1,CCN1,IL6,IL7R,CXCL8,CXCR2,CYBB,IL10,INHBA,RIPK2,GATA6,DCN,HPSE,ITGAX,ITGB2,PTGIS,PTGS2,ZEB2,STK4,CCN4,SRPX2,PTPRC,BTK,C3,C3AR1,C5AR1,LILRB4,DPYSL3,GRN,ADAM12,RGS2,LEP,LGALS1,EDNRA,NLRP3,LGALS3,ZFPM2,THBS1,THBS2,T…
GO: Biological Process	GO:0050920	regulation of chemotaxis			1.174e-14	7.361e-11	3.456e-13	3.221e-12	30	236	PDGFRA,CCR2,AIF1,CCL2,CCR1,CCL4,CCL5,CCL7,MPP1,SELL,FN1,IL6,CXCL8,CXCR2,SLAMF8,LGMN,NOD2,SCG2,C3AR1,C5AR1,RAC2,PLA2G7,GPR183,EDNRA,THBS1,SERPINE1,TREM2,GREM1,LYN,NCKAP1L
GO: Biological Process	GO:0051050	positive regulation of transport			1.536e-14	9.635e-11	4.503e-13	4.197e-12	70	1157	ABCA1,CEBPB,CLEC5A,CLEC7A,TWIST1,CCR2,S100A8,ADORA2B,S100A9,FCER1G,FCGR2B,FCN1,CXCL9,AIF1,CCL2,CCR1,CCL4,CCL5,FGR,MERTK,MMP12,AIM2,ALOX5,PLTP,SFRP4,ANXA1,RGCC,APOE,PPARG,POSTN,ABCG1,IGF1,PYCARD,CTSS,IL6,IL10,INHBA,RIPK2,PTPN22,PTAFR,ITGAM,ITGB2,PTGS2,NOD2,CD84,PTPRC,C3,IL33,RAC2,DOCK2,RAB31,CASP1,LEP,EDNRA,NLRP3,LGALS3,CD14,CD33,CD36,CD38,TLR1,TLR2,GZMB,TLR4,CRTAM,SERPINE1,TREM2,GREM1,HCLS1,NCKAP…
GO: Biological Process	GO:0010942	positive regulation of cell death			1.84e-14	1.154e-10	5.368e-13	5.004e-12	58	845	STK17B,CLEC7A,HMOX1,S100A8,S100A9,TYROBP,FAP,FCGR2B,UCP2,CCL2,CCL5,PLAUR,SRPX,MMP2,ALDH1A3,MMP9,MNDA,VAV1,SFRP4,ANXA1,RGCC,PPARG,FAS,CCN1,PYCARD,CTSD,IL6,CTSZ,CXCR2,IL10,INHBA,RASSF2,RIPK2,GATA6,NCF2,ITGA4,ITGAM,ITGB2,LILRB1,PTGIS,PTGS2,STK4,PTPRC,KCNMA1,C1QA,TIGAR,CASP1,GRN,NUPR1,LEP,NLRP3,THBS1,CD36,GZMB,TLR4,CD44,TNFRSF1B,LYN
GO: Biological Process	GO:0034341	response to interferon-gamma			2.125e-14	1.333e-10	6.171e-13	5.753e-12	28	208	HLA-DPA1,HLA-DPB1,HLA-DQB1,HLA-DRA,HLA-DRB4,FCGR1B,AIF1,CCL2,CCL4,CCL5,CCL7,CCL8,CCL11,CCL18,CCL20,MRC1,ICAM1,IRF8,PPARG,GBP2,PTAFR,CAPG,CASP1,OAS2,TLR2,TLR4,CD44,HCK
GO: Biological Process	GO:0071396	cellular response to lipid			2.301e-14	1.443e-10	6.649e-13	6.198e-12	50	654	ABCA1,CEBPB,LILRB2,SERPINF1,LY96,CXCL9,AHR,CCL2,CCL5,CCR5,MMP2,LY86,COL1A1,MRC1,ANXA1,ICAM1,IRF8,PPARG,PPBP,IGF1,PYCARD,IL1RN,IL6,CXCL8,IL10,INHBA,RIPK2,PTPN22,PTAFR,PTGDR,LILRB1,NOD2,CD84,NPC1,CASP1,CXCL2,CXCL3,LEP,NLRP3,CD14,CD86,CD36,TLR2,TLR4,SERPINE1,TREM2,TNFAIP3,TNFRSF1B,LYN,HCK
GO: Biological Process	GO:0002690	positive regulation of leukocyte chemotaxis			2.509e-14	1.573e-10	7.218e-13	6.728e-12	20	96	CCR2,AIF1,CCL2,CCR1,CCL4,CCL5,CCL7,SELL,IL6,CXCL8,CXCR2,LGMN,C3AR1,C5AR1,RAC2,PLA2G7,EDNRA,THBS1,SERPINE1,NCKAP1L
GO: Biological Process	GO:0042742	defense response to bacterium			2.578e-14	1.617e-10	7.383e-13	6.882e-12	36	353	CEBPB,ACP5,PLAC8,S100A8,S100A9,S100A12,FCER1G,CCL20,FGR,IRF8,PPBP,PYCARD,JCHAIN,IGKC,MYO1F,IGLC1,IL6,SLAMF8,IL10,RIPK2,GBP2,NOD2,C5AR1,GRN,NLRP3,RNASE2,RNASE6,CD36,TLR2,TLR4,SERPINE1,TREM2,TREM1,TRBC1,LYZ,HCK
GO: Biological Process	GO:0042327	positive regulation of phosphorylation			2.598e-14	1.63e-10	7.407e-13	6.905e-12	71	1197	EREG,PDGFRA,CD300A,ACTA2,CHI3L1,ADCY7,ADORA2B,S100A12,FCGR2B,PIK3CG,AIF1,CCL2,FGF7,CCR1,CCL4,CCL5,PLAUR,CCL7,CCL8,CCL11,GPNMB,CCL18,CCL20,FGR,MMP9,MAP3K8,FPR1,ICAM1,RGCC,APOE,FAS,AREG,IGF1,CCN1,PYCARD,IL1RN,MARCO,IL6,INHBA,RASSF2,RIPK2,PTPN22,PTGS2,ZEB2,NOD2,CD84,STK4,PTPRC,ACKR3,C3,C5AR1,TIGAR,NIBAN1,RAP2B,GPR183,LCP2,NUPR1,LEP,EDNRA,THBS1,TIMP2,CD36,TLR1,TLR2,TLR4,CD44,TREM2,GREM1,LYN,HCLS1,NCK…
GO: Biological Process	GO:0042116	macrophage activation			2.935e-14	1.841e-10	8.33e-13	7.765e-12	21	109	VSIG4,TLR7,TYROBP,FCGR2B,AIF1,PPARG,IL6,IL10,ITGAM,ITGB2,CD84,PTPRC,C1QA,C5AR1,IL33,GRN,THBS1,TLR1,TLR2,TLR4,TREM2
GO: Biological Process	GO:0032102	negative regulation of response to external stimulus			3.097e-14	1.942e-10	8.75e-13	8.156e-12	40	436	PDGFRA,ACP5,SERPINF1,VSIG4,ADA,ADCY7,FAP,FCGR2B,MICB,AIF1,CCL2,PLAUR,MMP12,AOAH,SAMHD1,APOE,PPARG,CR1,IGF1,PYCARD,SLAMF8,IL10,LILRB1,PTGIS,NOD2,PTPRC,SH2B3,GRN,LEP,NLRP3,THBD,THBS1,SERPINE1,CD44,IRAK3,DUSP10,TNFAIP3,GREM1,TNFAIP6,TNFRSF1B
GO: Biological Process	GO:0001774	microglial cell activation			3.554e-14	2.229e-10	9.951e-13	9.276e-12	16	55	TLR7,TYROBP,AIF1,PPARG,IL6,ITGAM,ITGB2,PTPRC,C1QA,C5AR1,IL33,GRN,TLR1,TLR2,TLR4,TREM2
GO: Biological Process	GO:0002269	leukocyte activation involved in inflammatory response			3.554e-14	2.229e-10	9.951e-13	9.276e-12	16	55	TLR7,TYROBP,AIF1,PPARG,IL6,ITGAM,ITGB2,PTPRC,C1QA,C5AR1,IL33,GRN,TLR1,TLR2,TLR4,TREM2
GO: Biological Process	GO:0007599	hemostasis			3.97e-14	2.49e-10	1.107e-12	1.031e-11	36	358	PDGFRA,ACTN1,S100A9,FAP,FBLN1,FCER1G,PIK3CG,PLAUR,MAFF,MERTK,PLEK,VAV1,COL1A1,COL1A2,COL3A1,FLI1,VWF,COMP,APOE,MMRN1,IL6,GATA6,HPSE,C3,GNA15,RAP2B,SH2B3,LCP2,PAPSS2,ZFPM2,THBD,THBS1,CD36,TLR4,SERPINE1,LYN
GO: Biological Process	GO:0002526	acute inflammatory response			5.078e-14	3.185e-10	1.409e-12	1.314e-11	22	125	CEBPB,CD163,S100A8,FCER1G,FCGR2B,PIK3CG,CCL5,ALOX5,ALOX5AP,FN1,ICAM1,PPARG,IL1RN,IL6,CXCR2,PTGS2,BTK,C3,NUPR1,NLRP3,TREM1,OSMR
GO: Biological Process	GO:0007162	negative regulation of cell adhesion			6.025e-14	3.779e-10	1.665e-12	1.552e-11	34	324	CEBPB,LILRB2,CD300A,CORO1C,VSIG4,FBLN1,FCGR2B,LPXN,GPNMB,MMP2,MMP12,COL1A1,ANXA1,RGCC,POSTN,ARHGDIB,MYO1F,IL1RN,IL10,FXYD5,PTPN22,LILRB1,PTPRC,ADAMDEC1,SH2B3,LGALS1,LGALS3,TGFBI,THBS1,PLXNC1,CD86,SERPINE1,CD44,TNFAIP3
GO: Biological Process	GO:0001934	positive regulation of protein phosphorylation			7.626e-14	4.783e-10	2.098e-12	1.955e-11	68	1140	EREG,PDGFRA,CD300A,ACTA2,CHI3L1,ADCY7,ADORA2B,S100A12,FCGR2B,PIK3CG,AIF1,CCL2,FGF7,CCR1,CCL4,CCL5,PLAUR,CCL7,CCL8,CCL11,GPNMB,CCL18,CCL20,MMP9,MAP3K8,FPR1,ICAM1,RGCC,APOE,FAS,AREG,IGF1,CCN1,PYCARD,IL1RN,MARCO,IL6,INHBA,RASSF2,RIPK2,PTPN22,PTGS2,ZEB2,NOD2,CD84,STK4,PTPRC,ACKR3,C3,C5AR1,NIBAN1,RAP2B,GPR183,LCP2,LEP,EDNRA,THBS1,TIMP2,CD36,TLR1,TLR2,TLR4,CD44,TREM2,GREM1,LYN,HCLS1,NCKAP1L
GO: Biological Process	GO:0002449	lymphocyte mediated immunity			8.377e-14	5.254e-10	2.294e-12	2.139e-11	37	387	HLA-DMA,HLA-DQB1,TCIRG1,CCR2,CLC,FCER1G,FCGR2B,MICB,CCL20,VAV1,ICAM1,CR1,FAS,RSAD2,IGKC,IGLC1,SLAMF7,IL6,IL7R,IL10,LILRB1,NOD2,PTPRC,BTK,C1QA,C1QB,C1R,C1S,C3,LEP,NLRP3,CORO1A,CD28,GZMB,CRTAM,TNFRSF1B,TRBC1
GO: Biological Process	GO:0050715	positive regulation of cytokine secretion			9.216e-14	5.78e-10	2.513e-12	2.343e-11	24	157	CLEC5A,TWIST1,FCN1,AIF1,FGR,MMP12,AIM2,RGCC,POSTN,PYCARD,IL10,RIPK2,PTPN22,NOD2,CD84,IL33,CASP1,NLRP3,CD14,CD36,TLR1,TLR2,TLR4,CRTAM
GO: Biological Process	GO:0002758	innate immune response-activating signal transduction			9.509e-14	5.964e-10	2.582e-12	2.406e-11	33	310	CD300A,CLEC7A,TLR7,LY96,S100A8,S100A9,COLEC12,FCER1G,FCN1,CLEC10A,RSAD2,CTSL,MARCO,CTSS,LGMN,RIPK2,PTPN22,PTAFR,ITGAM,ITGB2,NOD2,CLEC4A,BTK,CD14,CD86,CD36,TLR1,TLR2,TLR4,IRAK3,TNFAIP3,LYN,HCK
GO: Biological Process	GO:0051051	negative regulation of transport			1.014e-13	6.359e-10	2.741e-12	2.555e-11	48	632	LILRB2,CD300A,HMOX1,ADA,FABP5,TWIST1,CCR2,FBLN1,KCNE4,FCGR2B,CLIC2,UCP2,AHR,MMP9,PLN,SFRP4,FN1,ANXA1,ICAM1,RGCC,APOC1,APOE,PPARG,RSAD2,SRGN,IL1RN,IL6,IL10,INHBA,PTPN22,LILRB1,GEM,PTGS2,CD84,TRAT1,IL33,RGS2,LEP,NLRP3,LGALS3,CORO1A,THBS1,MCTP1,CD33,CD36,TLR2,TNFAIP3,TNFRSF1B
GO: Biological Process	GO:0007596	blood coagulation			1.383e-13	8.676e-10	3.723e-12	3.471e-11	35	353	PDGFRA,ACTN1,S100A9,FAP,FBLN1,FCER1G,PIK3CG,PLAUR,MAFF,MERTK,PLEK,VAV1,COL1A1,COL1A2,COL3A1,VWF,COMP,APOE,MMRN1,IL6,GATA6,HPSE,C3,GNA15,RAP2B,SH2B3,LCP2,PAPSS2,ZFPM2,THBD,THBS1,CD36,TLR4,SERPINE1,LYN
GO: Biological Process	GO:0032602	chemokine production			1.84e-13	1.154e-09	4.932e-12	4.598e-11	20	106	CLEC7A,TLR7,HMOX1,TWIST1,S100A8,ADORA2B,S100A9,AIF1,CCL5,POSTN,PYCARD,IL6,IL10,RIPK2,NOD2,CD84,IL33,TLR2,TLR4,TREM2
GO: Biological Process	GO:0060548	negative regulation of cell death			2.049e-13	1.285e-09	5.468e-12	5.097e-11	69	1192	CEBPB,CLEC5A,SERPINF1,EVI2B,HMOX1,ADA,PLAC8,TWIST1,FCER1G,PIK3CG,UCP2,AHR,AIF1,CCL2,CCL5,PLAUR,CCR5,GPNMB,MERTK,MMP9,COMP,FN1,ANXA1,ICAM1,APOE,FAS,IGF1,CCN1,LAMP3,IL1RN,IL6,IL7R,CXCR2,IL10,LGMN,NAIP,RIPK2,GATA6,BCL2A1,LILRB1,PTGS2,NOD2,CCN4,ACKR3,SCG2,C5AR1,NPC1,TIGAR,GRN,NUPR1,LEP,EDNRA,LGALS3,ZFPM2,CORO1A,THBS1,TIMP1,EGR3,CD28,CD38,SERPINE1,CD44,TREM2,TNFAIP3,GREM1,TNFRSF1B,HCK,HCLS1,NCKAP1L
GO: Biological Process	GO:0050817	coagulation			2.471e-13	1.55e-09	6.567e-12	6.121e-11	35	360	PDGFRA,ACTN1,S100A9,FAP,FBLN1,FCER1G,PIK3CG,PLAUR,MAFF,MERTK,PLEK,VAV1,COL1A1,COL1A2,COL3A1,VWF,COMP,APOE,MMRN1,IL6,GATA6,HPSE,C3,GNA15,RAP2B,SH2B3,LCP2,PAPSS2,ZFPM2,THBD,THBS1,CD36,TLR4,SERPINE1,LYN
GO: Biological Process	GO:1901342	regulation of vasculature development			2.549e-13	1.599e-09	6.746e-12	6.288e-11	40	465	SERPINF1,HMOX1,CHI3L1,TWIST1,CCR2,CCL2,CCL5,CCL11,GPNMB,MMP9,ANXA1,RGCC,PPARG,IL6,CXCL8,CXCR2,CYBB,IL10,GATA6,DCN,ITGAX,ITGB2,PTGIS,PTGS2,SRPX2,SULF1,C3,C3AR1,C5AR1,GRN,ADAM12,EMILIN1,LEP,LGALS3,THBS1,THBS2,CD36,SERPINE1,TNFAIP3,GREM1
GO: Biological Process	GO:0032755	positive regulation of interleukin-6 production			2.667e-13	1.672e-09	7.027e-12	6.55e-11	20	108	EREG,LILRB2,CLEC7A,TLR7,TWIST1,ADORA2B,TYROBP,FCER1G,AIF1,PYCARD,IL1RN,IL6,RIPK2,PTAFR,NOD2,IL33,CD36,TLR1,TLR2,TLR4
GO: Biological Process	GO:0043065	positive regulation of apoptotic process			2.743e-13	1.72e-09	7.197e-12	6.709e-11	53	772	STK17B,CLEC7A,HMOX1,S100A8,S100A9,TYROBP,FAP,CCL2,CCL5,PLAUR,SRPX,MMP2,ALDH1A3,MMP9,MNDA,VAV1,SFRP4,ANXA1,RGCC,PPARG,FAS,CCN1,PYCARD,CTSD,IL6,CTSZ,CXCR2,IL10,INHBA,RASSF2,RIPK2,GATA6,NCF2,ITGA4,ITGAM,LILRB1,PTGIS,PTGS2,STK4,PTPRC,KCNMA1,TIGAR,CASP1,GRN,NUPR1,LEP,NLRP3,THBS1,GZMB,TLR4,CD44,TNFRSF1B,LYN
GO: Biological Process	GO:0050921	positive regulation of chemotaxis			3.295e-13	2.067e-09	8.611e-12	8.026e-11	23	151	CCR2,AIF1,CCL2,CCR1,CCL4,CCL5,CCL7,SELL,FN1,IL6,CXCL8,CXCR2,LGMN,SCG2,C3AR1,C5AR1,RAC2,PLA2G7,EDNRA,THBS1,SERPINE1,TREM2,NCKAP1L
GO: Biological Process	GO:0071675	regulation of mononuclear cell migration			3.557e-13	2.231e-09	9.256e-12	8.627e-11	15	53	CCR2,AIF1,CCL2,CCR1,CCL5,SLAMF8,LGMN,C3AR1,C5AR1,PLA2G7,LGALS3,THBS1,SERPINE1,GREM1,LYN
GO: Biological Process	GO:0006911	phagocytosis, engulfment			3.58e-13	2.245e-09	9.277e-12	8.648e-11	21	123	ABCA1,CD300A,FCER1G,FCGR2B,AIF1,BIN2,PPARG,MSR1,IGKC,IGLC1,MARCO,ITGAM,ITGB2,C3,ARHGAP25,RAB31,THBS1,CD36,TREM2,TRBC1,NCKAP1L
GO: Biological Process	GO:0002886	regulation of myeloid leukocyte mediated immunity			3.72e-13	2.333e-09	9.566e-12	8.917e-11	16	63	CD300A,HMOX1,ADGRE2,CCR2,ADORA2B,FCER1G,FCGR2B,FGR,PTAFR,ITGAM,ITGB2,CD84,BTK,C3,RAC2,LYN
GO: Biological Process	GO:0043410	positive regulation of MAPK cascade			3.721e-13	2.334e-09	9.566e-12	8.917e-11	46	607	PDGFRA,ACTA2,CHI3L1,ADORA2B,S100A12,FCGR2B,PIK3CG,CCL2,CCR1,CCL4,CCL5,CCL7,CCL8,CCL11,GPNMB,CCL18,CCL20,MAP3K8,FPR1,ICAM1,APOE,IGF1,PYCARD,IL1RN,MARCO,IL6,RASSF2,RIPK2,PTPN22,ZEB2,NOD2,CD84,PTPRC,ACKR3,C3,C5AR1,GPR183,LEP,EDNRA,THBS1,TIMP2,CD36,TLR2,TLR4,CD44,TREM2
GO: Biological Process	GO:0009719	response to endogenous stimulus			3.916e-13	2.456e-09	1.003e-11	9.345e-11	90	1834	ABCA1,EREG,CEBPB,PDGFRA,SERPINF1,TCIRG1,ME1,ADCY7,FBN1,FCER1G,FCGR2B,PIK3CG,AHR,HRH1,AIF1,CCL2,FGF7,CCL5,MMP2,PLN,COL1A1,COL1A2,COL3A1,COL5A2,MXRA5,SFRP4,COL16A1,COMP,ANXA1,FOLR2,ICAM1,APOE,PPARG,FAS,AQP9,AREG,POSTN,ABCG1,IGF1,CCN1,IL1RN,CTSL,CTSS,IL6,CXCL8,CYBB,IL10,LGMN,MYO5A,INHBA,ASPN,RIPK2,GATA6,PTPN22,NCF2,ITGA4,PTAFR,PTGDR,ITGB2,PTGS2,NOD2,PTPRE,SULF1,KCNMA1,GNA15,NPC1,TIGAR,RAB31,GRN,EMIL…
GO: Biological Process	GO:0043068	positive regulation of programmed cell death			4.326e-13	2.713e-09	1.103e-11	1.028e-10	53	781	STK17B,CLEC7A,HMOX1,S100A8,S100A9,TYROBP,FAP,CCL2,CCL5,PLAUR,SRPX,MMP2,ALDH1A3,MMP9,MNDA,VAV1,SFRP4,ANXA1,RGCC,PPARG,FAS,CCN1,PYCARD,CTSD,IL6,CTSZ,CXCR2,IL10,INHBA,RASSF2,RIPK2,GATA6,NCF2,ITGA4,ITGAM,LILRB1,PTGIS,PTGS2,STK4,PTPRC,KCNMA1,TIGAR,CASP1,GRN,NUPR1,LEP,NLRP3,THBS1,GZMB,TLR4,CD44,TNFRSF1B,LYN
GO: Biological Process	GO:0019882	antigen processing and presentation			4.693e-13	2.944e-09	1.192e-11	1.111e-10	28	235	HLA-DMA,HLA-DPA1,HLA-DPB1,HLA-DQB1,LILRB2,HLA-DRA,HLA-DRB4,FCER1G,FCGR1B,FCGR2B,ICAM1,PYCARD,CTSD,CTSL,CTSS,CYBB,LGMN,PTPN22,NCF2,NCF4,NOD2,SEC24D,ERAP2,CLEC4A,MARCHF1,THBS1,CD36,TREM2
GO: Biological Process	GO:0031663	lipopolysaccharide-mediated signaling pathway			4.86e-13	3.048e-09	1.229e-11	1.146e-10	16	64	LY96,CCL2,CCL5,LY86,RIPK2,PTPN22,PTAFR,CD84,CD14,CD36,TLR2,TLR4,TREM2,TNFAIP3,LYN,HCK
GO: Biological Process	GO:0002822	regulation of adaptive immune response based on somatic recombination of immune receptors built from immunoglobulin superfamily domains			5.535e-13	3.472e-09	1.394e-11	1.3e-10	24	170	HLA-DMA,ADA,CCR2,CLC,FCER1G,FCGR2B,CCL20,ANXA1,CR1,RSAD2,IL6,IL7R,IL10,RIPK2,LILRB1,NOD2,PTPRC,BTK,C3,IL33,NLRP3,CD28,TNFAIP3,TNFRSF1B
GO: Biological Process	GO:0032612	interleukin-1 production			5.846e-13	3.667e-09	1.467e-11	1.367e-10	21	126	ABCA1,ACP5,CLEC7A,TYROBP,CCL20,AIM2,MNDA,ANXA1,IGF1,PYCARD,IL10,RIPK2,NOD2,CASP1,NLRP3,CD33,CD36,TLR2,TLR4,TREM2,TNFAIP3
GO: Biological Process	GO:0090087	regulation of peptide transport			6.656e-13	4.175e-09	1.663e-11	1.55e-10	56	867	CLEC5A,TCIRG1,TWIST1,S100A8,S100A9,FBLN1,FCGR2B,FCN1,UCP2,AIF1,CCL2,CCL5,FGR,MMP12,AIM2,FN1,ANXA1,RGCC,APOE,PPARG,POSTN,ABCG1,RSAD2,IGF1,SRGN,PYCARD,IL6,IL10,RIPK2,PTPN22,ITGAM,ITGB2,LILRB1,PTGS2,NOD2,CD84,CCN4,IL33,RAC2,CASP1,LCP1,LEP,NLRP3,CD14,CD33,CD36,CD38,TLR1,TLR2,TLR4,CRTAM,TREM2,TNFAIP3,TNFRSF1B,LYN,HCLS1
GO: Biological Process	GO:0002700	regulation of production of molecular mediator of immune response			6.68e-13	4.19e-09	1.663e-11	1.55e-10	23	156	HMOX1,CCR2,CLC,FCER1G,FCGR2B,CCL20,RSAD2,IL6,IL10,PTPN22,LILRB1,NOD2,PTPRC,BTK,IL33,NLRP3,CD28,CD36,TLR2,TLR4,IRAK3,TNFAIP3,TNFRSF1B
GO: Biological Process	GO:0061900	glial cell activation			8.172e-13	5.125e-09	2.026e-11	1.888e-10	16	66	TLR7,TYROBP,AIF1,PPARG,IL6,ITGAM,ITGB2,PTPRC,C1QA,C5AR1,IL33,GRN,TLR1,TLR2,TLR4,TREM2
GO: Biological Process	GO:0022603	regulation of anatomical structure morphogenesis			9.196e-13	5.768e-09	2.271e-11	2.117e-10	71	1288	HLA-DMA,PDGFRA,CORO1C,SERPINF1,HMOX1,CHI3L1,ADA,TWIST1,CCR2,TYROBP,FBLN1,BASP1,CXCL9,CCL2,FGF7,CCL5,CCL7,CCL11,GPNMB,FGR,MMP9,COL5A1,COL5A2,FN1,ANXA1,ICAM1,RGCC,GAS7,APOE,PPARG,RND3,POSTN,IL1RN,IL6,CXCL8,CXCR2,CYBB,IL10,ASPN,GATA6,DCN,ITGAX,ITGB2,PTGIS,PTGS2,ZEB2,SRPX2,SULF1,C3,C3AR1,C5AR1,LST1,GRN,ADAM12,EMILIN1,LEP,EDNRA,LGALS3,CORO1A,THBS1,THBS2,PLXNC1,CD36,SERPINE1,CD44,TREM2,CD53,TNFAIP3,GRE…
GO: Biological Process	GO:0048585	negative regulation of response to stimulus			9.758e-13	6.12e-09	2.4e-11	2.237e-10	92	1927	EREG,PDGFRA,CD300A,ACP5,SERPINF1,VSIG4,HMOX1,LY96,ADA,ADCY7,TWIST1,CCR2,FAP,FBLN1,FBN1,FCGR2B,CLIC2,MICB,UCP2,LPXN,AIF1,CCL2,CCL5,PLAUR,PLEK,MMP9,MMP12,COL3A1,SFRP4,ANXA1,ICAM1,AOAH,SAMHD1,APOE,PPARG,CR1,FAS,AREG,IGF1,PYCARD,IL1RN,MARCO,IL6,IL7R,CXCL8,SLAMF8,IL10,LGMN,RASSF2,ASPN,PTPN22,BCL2A1,SAMSN1,DCN,LILRB1,PTGIS,PTGS2,NOD2,CD84,STK4,PTPRC,PTPRE,SULF1,ACKR3,SCG2,ARHGAP25,IL33,LILRB4,SH2B3,GRN…
GO: Biological Process	GO:0070664	negative regulation of leukocyte proliferation			1.055e-12	6.615e-09	2.584e-11	2.409e-10	18	90	CEBPB,LILRB2,CD300A,VSIG4,TYROBP,FCGR2B,CCL8,GPNMB,MNDA,IL10,LILRB1,BTK,LST1,CD86,CD44,TNFAIP3,GREM1,LYN
GO: Biological Process	GO:0006968	cellular defense response			1.157e-12	7.258e-09	2.819e-11	2.627e-10	15	57	LILRB2,CLEC5A,TCIRG1,LY96,CCR2,ADORA2B,TYROBP,CXCL9,CCR5,MNDA,CXCR2,NCF2,ITK,TRAT1,C5AR1
GO: Biological Process	GO:0098657	import into cell			1.159e-12	7.272e-09	2.819e-11	2.627e-10	58	932	ABCA1,CD300A,CLEC7A,HMOX1,CD163,COLEC12,FCER1G,FCGR1B,FCGR2B,FCN1,PIK3CG,AIF1,BIN2,EEA1,CLEC10A,MRC1,SFRP4,FOLR2,APOC1,APOE,PPARG,SLC1A3,MSR1,PYCARD,JCHAIN,IGKC,IGLC1,MARCO,SOAT1,CXCL8,CXCR2,IL10RA,ITGA4,ITGAM,ITGB2,LILRB1,TRAT1,ACKR3,C3,ARHGAP25,NPC1,DOCK2,RAB31,GRN,OLR1,RGS2,LGALS3,THBS1,LIPA,MCTP1,CD14,CD36,SERPINE1,TREM2,GREM1,TRBC1,M6PR,NCKAP1L
GO: Biological Process	GO:0042108	positive regulation of cytokine biosynthetic process			1.278e-12	8.018e-09	3.096e-11	2.886e-10	17	79	EREG,CLEC7A,TLR7,HMOX1,CCR2,TYROBP,CCL20,IL6,CYBB,PTAFR,PTPRC,THBS1,CD28,CD86,TLR1,TLR2,TLR4
GO: Biological Process	GO:0031348	negative regulation of defense response			1.29e-12	8.092e-09	3.112e-11	2.901e-10	29	263	ACP5,SERPINF1,VSIG4,ADA,ADCY7,FCGR2B,MICB,MMP12,AOAH,SAMHD1,APOE,PPARG,CR1,IGF1,PYCARD,SLAMF8,IL10,LILRB1,PTGIS,NOD2,PTPRC,GRN,NLRP3,CD44,IRAK3,DUSP10,TNFAIP3,TNFAIP6,TNFRSF1B
GO: Biological Process	GO:0042107	cytokine metabolic process			1.357e-12	8.513e-09	3.262e-11	3.04e-10	22	146	EREG,CEBPB,CLEC7A,TLR7,HMOX1,CCR2,TYROBP,CCL20,IL6,CYBB,IL10,INHBA,PTAFR,LILRB1,PTPRC,THBS1,CD28,CD86,TLR1,TLR2,TLR4,TREM1
GO: Biological Process	GO:0042035	regulation of cytokine biosynthetic process			1.496e-12	9.381e-09	3.567e-11	3.325e-10	21	132	EREG,CEBPB,CLEC7A,TLR7,HMOX1,CCR2,TYROBP,CCL20,IL6,CYBB,IL10,INHBA,PTAFR,LILRB1,PTPRC,THBS1,CD28,CD86,TLR1,TLR2,TLR4
GO: Biological Process	GO:0099024	plasma membrane invagination			1.496e-12	9.381e-09	3.567e-11	3.325e-10	21	132	ABCA1,CD300A,FCER1G,FCGR2B,AIF1,BIN2,PPARG,MSR1,IGKC,IGLC1,MARCO,ITGAM,ITGB2,C3,ARHGAP25,RAB31,THBS1,CD36,TREM2,TRBC1,NCKAP1L
GO: Biological Process	GO:0070665	positive regulation of leukocyte proliferation			1.505e-12	9.436e-09	3.574e-11	3.332e-10	23	162	HLA-DPA1,HLA-DPB1,LILRB2,ADA,CCR2,AIF1,CCL5,ANXA1,IGF1,PYCARD,IL6,RIPK2,PTPN22,PTPRC,GPR183,LEP,CORO1A,CD28,CD86,CD38,TLR4,LYN,NCKAP1L
GO: Biological Process	GO:1902107	positive regulation of leukocyte differentiation			1.536e-12	9.633e-09	3.635e-11	3.388e-10	24	178	HLA-DMA,LILRB2,EVI2B,ADA,CCR2,TYROBP,CCR1,CCL5,ANXA1,IL6,IL7R,RIPK2,PTPRC,BTK,LILRB4,LGALS1,NLRP3,LGALS3,EGR3,CD86,TREM2,DUSP10,HCLS1,NCKAP1L
GO: Biological Process	GO:0008285	negative regulation of cell population proliferation			1.547e-12	9.703e-09	3.648e-11	3.4e-10	55	859	EREG,CEBPB,LILRB2,CD300A,SERPINF1,VSIG4,HMOX1,ADORA2B,TYROBP,S100A11,ADORA3,FAP,FBLN1,FCGR2B,AHR,AIF1,CCL2,CCL8,SRPX,GPNMB,MMP9,MNDA,CNN1,SFRP4,RGCC,APOE,PPARG,FAS,IGF1,IL6,CXCL8,IL10,INHBA,LILRB1,PTGS2,STK4,SULF1,SCG2,BTK,LST1,RARRES1,SH2B3,NUPR1,OGN,LGALS3,THBS1,TIMP2,CD86,CD33,TLR2,CD44,DUSP10,TNFAIP3,GREM1,LYN
GO: Biological Process	GO:1903706	regulation of hemopoiesis			1.595e-12	1e-08	3.746e-11	3.492e-10	42	538	CEBPB,HLA-DMA,LILRB2,EVI2B,ADA,CCR2,TYROBP,FBN1,FCGR2B,CCR1,CCL5,GPR171,CCL20,ANXA1,CR1,FAS,IL6,IL7R,SLAMF8,INHBA,RASSF2,RIPK2,LILRB1,PTPRC,BTK,LILRB4,LEP,LGALS1,NLRP3,LGALS3,THBS1,EGR3,CD28,CD86,LOX,TLR4,CD44,TREM2,DUSP10,LYN,HCLS1,NCKAP1L
GO: Biological Process	GO:0010243	response to organonitrogen compound			1.689e-12	1.059e-08	3.953e-11	3.685e-10	65	1133	ABCA1,EREG,CEBPB,PDGFRA,TCIRG1,ADA,ADCY7,FBN1,FCER1G,FCGR2B,PIK3CG,AHR,HRH1,AIF1,MMP2,MMP9,MMP12,PLN,COL1A1,COL1A2,COL3A1,SELL,COL5A2,COL16A1,ANXA1,FOLR2,ICAM1,APOE,PPARG,SLC1A3,AQP9,AREG,IGF1,IL6,CYBB,IL10,LGMN,MYO5A,RIPK2,PTPN22,ITGA4,PTAFR,ITGB2,PTGS2,NOD2,PTPRE,GNA15,C5AR1,NNMT,NPC1,RAB31,RGS2,LEP,EDNRA,NLRP3,THBD,TIMP1,EGR2,CD36,TLR2,TLR4,TREM2,IRAK3,TNFAIP3,LYN
GO: Biological Process	GO:0019932	second-messenger-mediated signaling			1.726e-12	1.083e-08	4.025e-11	3.752e-10	46	634	ABCA1,ADGRE2,ADA,ADCY7,CCR2,ADORA2B,CLIC2,CXCL9,AHR,HRH1,CCL2,CCR1,CCL4,CCR5,CCL20,PLEK,PLN,GPR65,LAT2,LMCD1,ANXA1,FPR1,FPR3,APOE,IGF1,MARCO,CXCL8,CXCR2,MYO5A,PTGDR,PTPRC,TRAT1,ACKR3,BTK,C3AR1,GNA15,C5AR1,CCRL2,MCOLN1,RGS1,RGS2,EDNRA,THBS1,MCTP1,CD36,TREM2
GO: Biological Process	GO:1901698	response to nitrogen compound			1.749e-12	1.097e-08	4.062e-11	3.786e-10	68	1219	ABCA1,EREG,CEBPB,PDGFRA,TCIRG1,ADA,ADCY7,COLEC12,FBN1,FCER1G,FCGR2B,PIK3CG,AHR,HRH1,AIF1,MMP2,MMP9,MMP12,PLN,COL1A1,COL1A2,COL3A1,SELL,COL5A2,COL16A1,ANXA1,FOLR2,ICAM1,APOE,PPARG,SLC1A3,AQP9,AREG,IGF1,IL6,CYBB,IL10,LGMN,MYO5A,RIPK2,PTPN22,ITGA4,PTAFR,ITGB2,PTGS2,NOD2,PTPRE,GNA15,C5AR1,NNMT,NPC1,RAB31,TDO2,RGS2,LEP,EDNRA,NLRP3,THBD,THBS1,TIMP1,EGR2,CD36,TLR2,TLR4,TREM2,IRAK3,TNFAIP3,LYN
GO: Biological Process	GO:0051250	negative regulation of lymphocyte activation			1.956e-12	1.227e-08	4.527e-11	4.219e-10	23	164	CEBPB,LILRB2,CD300A,VSIG4,TYROBP,FCGR2B,GPNMB,MERTK,MNDA,ANXA1,FAS,IL10,INHBA,PTPN22,SAMSN1,LILRB1,BTK,LST1,LGALS3,CD86,CD44,TNFAIP3,LYN
GO: Biological Process	GO:0032722	positive regulation of chemokine production			2.184e-12	1.37e-08	5.036e-11	4.695e-10	16	70	CLEC7A,TLR7,HMOX1,TWIST1,ADORA2B,AIF1,CCL5,POSTN,PYCARD,IL6,RIPK2,NOD2,CD84,IL33,TLR2,TLR4
GO: Biological Process	GO:0050671	positive regulation of lymphocyte proliferation			2.375e-12	1.49e-08	5.457e-11	5.087e-10	22	150	HLA-DPA1,HLA-DPB1,LILRB2,ADA,CCR2,AIF1,CCL5,ANXA1,IGF1,PYCARD,IL6,RIPK2,PTPN22,PTPRC,GPR183,LEP,CORO1A,CD28,CD86,CD38,TLR4,NCKAP1L
GO: Biological Process	GO:0002532	production of molecular mediator involved in inflammatory response			2.438e-12	1.529e-08	5.582e-11	5.203e-10	17	82	CD300A,CLEC7A,ADCY7,FCER1G,ALOX5,ALOX5AP,PYCARD,SLAMF8,NOD2,BTK,GRN,LEP,CD36,TLR4,SERPINE1,DUSP10,LYN
GO: Biological Process	GO:0070201	regulation of establishment of protein localization			3.063e-12	1.921e-08	6.986e-11	6.512e-10	55	874	CLEC5A,TCIRG1,TWIST1,FBLN1,FCGR2B,FCN1,UCP2,AIF1,CCL2,CCL5,FGR,MMP12,AIM2,FN1,ANXA1,RGCC,APOE,POSTN,ABCG1,RSAD2,IGF1,SRGN,PYCARD,CTSD,IL6,IL10,RIPK2,PTPN22,ITGAM,ITGB2,LILRB1,PTGS2,NOD2,CD84,CCN4,IL33,RAC2,CASP1,LCP1,LEP,NLRP3,CD14,CD33,CD36,CD38,TLR1,TLR2,GZMB,TLR4,CRTAM,TREM2,TNFAIP3,TNFRSF1B,LYN,HCLS1
GO: Biological Process	GO:0032946	positive regulation of mononuclear cell proliferation			3.121e-12	1.958e-08	7.093e-11	6.611e-10	22	152	HLA-DPA1,HLA-DPB1,LILRB2,ADA,CCR2,AIF1,CCL5,ANXA1,IGF1,PYCARD,IL6,RIPK2,PTPN22,PTPRC,GPR183,LEP,CORO1A,CD28,CD86,CD38,TLR4,NCKAP1L
GO: Biological Process	GO:0050864	regulation of B cell activation			3.276e-12	2.055e-08	7.399e-11	6.896e-10	25	201	CD300A,ADA,TYROBP,FCGR2B,AHR,MNDA,FAS,IGKC,IGLC1,IL6,SLAMF8,IL10,INHBA,SAMSN1,NOD2,PTPRC,BTK,GPR183,CD28,CD38,TLR4,TNFAIP3,TRBC1,LYN,NCKAP1L
GO: Biological Process	GO:0001776	leukocyte homeostasis			3.279e-12	2.057e-08	7.399e-11	6.896e-10	19	109	TCIRG1,ADA,CCR2,FCER1G,AHR,CCL2,MERTK,ANXA1,DOCK10,FAS,IL6,CXCR2,SH2B3,GPR183,CORO1A,CD44,TNFAIP3,LYN,NCKAP1L
GO: Biological Process	GO:0051223	regulation of protein transport			3.612e-12	2.265e-08	8.119e-11	7.568e-10	53	825	CLEC5A,TCIRG1,TWIST1,FBLN1,FCGR2B,FCN1,UCP2,AIF1,CCL2,CCL5,FGR,MMP12,AIM2,FN1,ANXA1,RGCC,APOE,POSTN,ABCG1,RSAD2,IGF1,SRGN,PYCARD,IL6,IL10,RIPK2,PTPN22,ITGAM,ITGB2,LILRB1,PTGS2,NOD2,CD84,CCN4,IL33,RAC2,CASP1,LCP1,LEP,NLRP3,CD14,CD33,CD36,CD38,TLR1,TLR2,TLR4,CRTAM,TREM2,TNFAIP3,TNFRSF1B,LYN,HCLS1
GO: Biological Process	GO:0032637	interleukin-8 production			3.691e-12	2.315e-08	8.269e-11	7.707e-10	17	84	CLEC7A,TLR7,CHI3L1,FCN1,ANXA1,PYCARD,IL10,PTPN22,NOD2,PTPRC,LEP,CD14,CD33,TLR1,TLR2,TLR4,SERPINE1
GO: Biological Process	GO:0043069	negative regulation of programmed cell death			4.031e-12	2.528e-08	8.998e-11	8.387e-10	62	1071	CEBPB,CLEC5A,EVI2B,HMOX1,ADA,PLAC8,TWIST1,FCER1G,PIK3CG,UCP2,AIF1,CCL2,CCL5,PLAUR,CCR5,MERTK,MMP9,COMP,FN1,ANXA1,ICAM1,APOE,FAS,IGF1,CCN1,LAMP3,IL1RN,IL6,IL7R,CXCR2,IL10,LGMN,NAIP,RIPK2,GATA6,BCL2A1,LILRB1,PTGS2,NOD2,ACKR3,SCG2,C5AR1,TIGAR,GRN,NUPR1,LEP,EDNRA,LGALS3,CORO1A,THBS1,TIMP1,EGR3,CD28,CD38,SERPINE1,CD44,TREM2,TNFAIP3,GREM1,HCK,HCLS1,NCKAP1L
GO: Biological Process	GO:0002698	negative regulation of immune effector process			4.196e-12	2.632e-08	9.332e-11	8.698e-10	21	139	CD300A,VSIG4,HMOX1,CCR2,FCGR2B,MICB,ANXA1,CR1,IL7R,SLAMF8,IL10,LILRB1,NOD2,CD84,PTPRC,IL33,GRN,LGALS3,IRAK3,DUSP10,TNFAIP3
GO: Biological Process	GO:0050764	regulation of phagocytosis			4.592e-12	2.88e-08	1.018e-10	9.485e-10	19	111	CD300A,CLEC7A,FCER1G,FCGR2B,CCL2,FGR,MERTK,PPARG,PYCARD,NOD2,PTPRC,C3,DOCK2,RAB31,CD36,TLR2,TREM2,HCK,NCKAP1L
GO: Biological Process	GO:0043066	negative regulation of apoptotic process			4.893e-12	3.069e-08	1.081e-10	1.007e-09	61	1048	CEBPB,CLEC5A,EVI2B,HMOX1,ADA,PLAC8,TWIST1,FCER1G,PIK3CG,UCP2,AIF1,CCL2,CCL5,PLAUR,CCR5,MERTK,MMP9,COMP,FN1,ANXA1,ICAM1,APOE,FAS,IGF1,CCN1,LAMP3,IL1RN,IL6,IL7R,CXCR2,IL10,LGMN,NAIP,RIPK2,GATA6,BCL2A1,LILRB1,PTGS2,NOD2,ACKR3,SCG2,C5AR1,GRN,NUPR1,LEP,EDNRA,LGALS3,CORO1A,THBS1,TIMP1,EGR3,CD28,CD38,SERPINE1,CD44,TREM2,TNFAIP3,GREM1,HCK,HCLS1,NCKAP1L
GO: Biological Process	GO:0051345	positive regulation of hydrolase activity			5.224e-12	3.277e-08	1.15e-10	1.072e-09	55	886	PDGFRA,CD300A,CORO1C,CLEC7A,S100A8,S100A9,FBLN1,HRH1,CCL2,CCL4,CCL5,CCL7,CCL8,CCL11,CCL18,CCL20,PLEK,AIM2,VAV1,GPR65,FN1,FPR1,FPR3,ICAM1,DOCK10,PPARG,CR1,FAS,ARHGDIB,CCN1,PYCARD,CTSD,ADAP2,CXCR2,LGMN,RIPK2,PTAFR,ITK,PTPRC,GM2A,C3AR1,GNA15,ARHGAP25,C5AR1,DOCK2,CASP1,GRN,RGS1,RGS2,EDNRA,NLRP3,CD33,LYN,PCOLCE,NCKAP1L
GO: Biological Process	GO:0090025	regulation of monocyte chemotaxis			5.372e-12	3.37e-08	1.175e-10	1.095e-09	11	27	CCR2,AIF1,CCL2,CCR1,CCL5,SLAMF8,LGMN,PLA2G7,SERPINE1,GREM1,LYN
GO: Biological Process	GO:1903708	positive regulation of hemopoiesis			5.378e-12	3.373e-08	1.175e-10	1.095e-09	26	223	HLA-DMA,LILRB2,EVI2B,ADA,CCR2,TYROBP,CCR1,CCL5,ANXA1,IL6,IL7R,INHBA,RIPK2,PTPRC,BTK,LILRB4,LEP,LGALS1,NLRP3,LGALS3,EGR3,CD86,TREM2,DUSP10,HCLS1,NCKAP1L
GO: Biological Process	GO:0042113	B cell activation			5.52e-12	3.462e-08	1.202e-10	1.121e-09	32	338	CD300A,TCIRG1,ADA,TYROBP,FCGR2B,AHR,MNDA,LAT2,DOCK10,FAS,IGKC,IGLC1,IL6,IL7R,SLAMF8,IL10,INHBA,ITGA4,SAMSN1,NOD2,PTPRC,BTK,GPR183,LGALS1,CD28,CD86,CD38,TLR4,TNFAIP3,TRBC1,LYN,NCKAP1L
GO: Biological Process	GO:0032642	regulation of chemokine production			5.826e-12	3.654e-08	1.264e-10	1.179e-09	18	99	CLEC7A,TLR7,HMOX1,TWIST1,ADORA2B,AIF1,CCL5,POSTN,PYCARD,IL6,IL10,RIPK2,NOD2,CD84,IL33,TLR2,TLR4,TREM2
GO: Biological Process	GO:0030217	T cell differentiation			6.206e-12	3.892e-08	1.342e-10	1.251e-09	29	280	HLA-DMA,LILRB2,TCIRG1,ADA,CCR2,FCER1G,CCL20,VAV1,ANXA1,CR1,FAS,RSAD2,IL6,IL7R,RIPK2,PTPN22,ITK,PTPRC,LILRB4,DOCK2,GPR183,LEP,NLRP3,EGR3,CD28,CD86,CD44,DUSP10,NCKAP1L
GO: Biological Process	GO:0032652	regulation of interleukin-1 production			6.382e-12	4.003e-08	1.375e-10	1.282e-09	19	113	ACP5,CLEC7A,TYROBP,CCL20,AIM2,MNDA,ANXA1,IGF1,PYCARD,IL10,RIPK2,NOD2,CASP1,NLRP3,CD33,TLR2,TLR4,TREM2,TNFAIP3
GO: Biological Process	GO:0045766	positive regulation of angiogenesis			7.311e-12	4.586e-08	1.57e-10	1.464e-09	26	226	HMOX1,CHI3L1,TWIST1,CCL5,CCL11,MMP9,ANXA1,CXCL8,CXCR2,CYBB,IL10,GATA6,ITGAX,ITGB2,PTGIS,PTGS2,SRPX2,C3,C3AR1,C5AR1,GRN,ADAM12,LGALS3,THBS1,SERPINE1,GREM1
GO: Biological Process	GO:0043300	regulation of leukocyte degranulation			8.262e-12	5.182e-08	1.768e-10	1.648e-09	14	54	CD300A,HMOX1,ADGRE2,CCR2,ADORA2B,FCER1G,FCGR2B,FGR,PTAFR,ITGAM,ITGB2,CD84,RAC2,LYN
GO: Biological Process	GO:0071887	leukocyte apoptotic process			8.381e-12	5.257e-08	1.788e-10	1.667e-09	20	129	ADA,CLC,FCER1G,CCL5,CCR5,MERTK,ANXA1,FAS,CTSL,IL6,IL7R,CXCR2,IL10,LILRB1,NOD2,BTK,LGALS3,CD44,LYN,HCLS1
GO: Biological Process	GO:0042089	cytokine biosynthetic process			8.434e-12	5.29e-08	1.793e-10	1.671e-09	21	144	EREG,CEBPB,CLEC7A,TLR7,HMOX1,CCR2,TYROBP,CCL20,IL6,CYBB,IL10,INHBA,PTAFR,LILRB1,PTPRC,THBS1,CD28,CD86,TLR1,TLR2,TLR4
GO: Biological Process	GO:0002793	positive regulation of peptide secretion			9.521e-12	5.972e-08	2.017e-10	1.88e-09	32	345	CLEC5A,TWIST1,S100A8,S100A9,FCN1,AIF1,FGR,MMP12,AIM2,RGCC,POSTN,ABCG1,IGF1,PYCARD,IL6,IL10,RIPK2,PTPN22,NOD2,CD84,IL33,CASP1,NLRP3,CD14,CD33,CD36,CD38,TLR1,TLR2,TLR4,CRTAM,TREM2
GO: Biological Process	GO:0070555	response to interleukin-1			1.079e-11	6.766e-08	2.278e-10	2.123e-09	25	212	CEBPB,CHI3L1,CCL2,CCL4,CCL5,CCL7,CCL8,CCL11,CCL18,CCL20,FN1,ANXA1,MAP3K8,ICAM1,PYCARD,IL1RN,IL6,CXCL8,RIPK2,GBP2,PTGIS,NOD2,CD38,SERPINE1,IRAK3
GO: Biological Process	GO:0006898	receptor-mediated endocytosis			1.177e-11	7.382e-08	2.477e-10	2.309e-09	34	390	CD300A,HMOX1,CD163,COLEC12,FCER1G,FCGR1B,FCGR2B,MRC1,SFRP4,FOLR2,APOC1,APOE,MSR1,JCHAIN,IGKC,IGLC1,MARCO,SOAT1,CXCL8,CXCR2,ITGA4,ITGAM,ITGB2,LILRB1,ACKR3,C3,NPC1,RAB31,LIPA,CD14,CD36,SERPINE1,GREM1,M6PR
GO: Biological Process	GO:0061041	regulation of wound healing			1.298e-11	8.144e-08	2.724e-10	2.539e-09	22	163	PDGFRA,ACTA2,CLEC7A,S100A9,FAP,FCER1G,CCL2,PLAUR,PLEK,ANXA1,APOE,HPSE,CCN4,SH2B3,THBD,THBS1,CD36,TLR4,SERPINE1,DUSP10,TNFAIP3,LYN
GO: Biological Process	GO:0032963	collagen metabolic process			1.494e-11	9.373e-08	3.124e-10	2.912e-09	20	133	ADORA2B,FAP,MFAP4,CCL2,MMP1,MMP2,MMP9,MMP12,COL1A1,COL1A2,COL5A1,COL15A1,RGCC,PPARG,CTSD,CTSL,CTSS,IL6,EMILIN1,SERPINE1
GO: Biological Process	GO:0051047	positive regulation of secretion			1.502e-11	9.421e-08	3.13e-10	2.918e-09	40	529	CLEC5A,TWIST1,S100A8,ADORA2B,S100A9,FCER1G,FCN1,AIF1,FGR,MMP12,AIM2,RGCC,POSTN,ABCG1,IGF1,PYCARD,IL6,IL10,INHBA,RIPK2,PTPN22,PTAFR,ITGAM,ITGB2,NOD2,CD84,IL33,CASP1,LEP,NLRP3,LGALS3,CD14,CD33,CD36,CD38,TLR1,TLR2,TLR4,CRTAM,TREM2
GO: Biological Process	GO:0002440	production of molecular mediator of immune response			1.621e-11	1.017e-07	3.366e-10	3.138e-09	30	311	HLA-DQB1,TCIRG1,HMOX1,CCR2,CLC,FCER1G,FCGR2B,CCL20,SAMHD1,FAS,RSAD2,IGKC,IL6,IL7R,IL10,PTPN22,LILRB1,NOD2,PTPRC,BTK,IL33,NLRP3,CD28,CD36,TLR2,TLR4,TREM1,IRAK3,TNFAIP3,TNFRSF1B
GO: Biological Process	GO:0046631	alpha-beta T cell activation			1.661e-11	1.042e-07	3.438e-10	3.205e-09	22	165	CEBPB,CD300A,TCIRG1,ADA,CCR2,CCL20,ANXA1,RSAD2,IL6,RIPK2,PTPN22,LILRB1,ITK,PTPRC,CLEC4A,DOCK2,GPR183,NLRP3,CD28,CD86,CD44,NCKAP1L
GO: Biological Process	GO:0002718	regulation of cytokine production involved in immune response			2.075e-11	1.301e-07	4.281e-10	3.991e-09	17	93	HMOX1,CCR2,CLC,FCER1G,CCL20,RSAD2,IL6,IL10,LILRB1,NOD2,BTK,NLRP3,CD36,TLR2,TLR4,IRAK3,TNFRSF1B
GO: Biological Process	GO:0071347	cellular response to interleukin-1			2.204e-11	1.382e-07	4.532e-10	4.225e-09	23	184	CEBPB,CHI3L1,CCL2,CCL4,CCL5,CCL7,CCL8,CCL11,CCL18,CCL20,FN1,MAP3K8,ICAM1,PYCARD,IL1RN,IL6,CXCL8,RIPK2,GBP2,PTGIS,NOD2,SERPINE1,IRAK3
GO: Biological Process	GO:0031401	positive regulation of protein modification process			2.22e-11	1.392e-07	4.55e-10	4.241e-09	71	1379	EREG,PDGFRA,LILRB2,CD300A,ACTA2,CHI3L1,ADCY7,ADORA2B,S100A12,FCGR2B,PIK3CG,AIF1,CCL2,FGF7,CCR1,CCL4,CCL5,PLAUR,CCL7,CCL8,CCL11,GPNMB,CCL18,CCL20,MMP9,MAP3K8,FPR1,ICAM1,RGCC,APOE,FAS,AREG,IGF1,CCN1,PYCARD,IL1RN,MARCO,IL6,INHBA,RASSF2,RIPK2,PTPN22,PTGS2,ZEB2,NOD2,CD84,STK4,PTPRC,ACKR3,C3,C5AR1,NIBAN1,RAP2B,GPR183,LCP2,NUPR1,LEP,EDNRA,THBS1,TIMP2,CD33,CD36,TLR1,TLR2,TLR4,CD44,TREM2,GREM1,LYN,HCLS1,N…
GO: Biological Process	GO:0050714	positive regulation of protein secretion			2.234e-11	1.401e-07	4.564e-10	4.254e-09	30	315	CLEC5A,TWIST1,FCN1,AIF1,FGR,MMP12,AIM2,RGCC,POSTN,ABCG1,IGF1,PYCARD,IL6,IL10,RIPK2,PTPN22,NOD2,CD84,IL33,CASP1,NLRP3,CD14,CD33,CD36,CD38,TLR1,TLR2,TLR4,CRTAM,TREM2
GO: Biological Process	GO:0032611	interleukin-1 beta production			2.686e-11	1.685e-07	5.47e-10	5.099e-09	18	108	ABCA1,ACP5,CLEC7A,TYROBP,AIM2,MNDA,IGF1,PYCARD,RIPK2,NOD2,CASP1,NLRP3,CD33,CD36,TLR2,TLR4,TREM2,TNFAIP3
GO: Biological Process	GO:0045730	respiratory burst			2.792e-11	1.751e-07	5.668e-10	5.283e-09	12	39	CD52,CLEC7A,PIK3CG,JCHAIN,CYBB,SLAMF8,NCF2,NCF4,RAC2,GRN,DUSP10,HCK
GO: Biological Process	GO:1903532	positive regulation of secretion by cell			2.832e-11	1.777e-07	5.731e-10	5.342e-09	38	493	CLEC5A,TWIST1,ADORA2B,FCER1G,FCN1,AIF1,FGR,MMP12,AIM2,RGCC,POSTN,ABCG1,IGF1,PYCARD,IL6,IL10,INHBA,RIPK2,PTPN22,PTAFR,ITGAM,ITGB2,NOD2,CD84,IL33,CASP1,LEP,NLRP3,LGALS3,CD14,CD33,CD36,CD38,TLR1,TLR2,TLR4,CRTAM,TREM2
GO: Biological Process	GO:1903034	regulation of response to wounding			3.279e-11	2.056e-07	6.612e-10	6.163e-09	24	205	PDGFRA,ACTA2,CLEC7A,S100A9,FAP,FCER1G,CCL2,PLAUR,PLEK,ANXA1,APOE,IL10,HPSE,CCN4,SH2B3,GRN,THBD,THBS1,CD36,TLR4,SERPINE1,DUSP10,TNFAIP3,LYN
GO: Biological Process	GO:0002706	regulation of lymphocyte mediated immunity			3.823e-11	2.398e-07	7.685e-10	7.163e-09	22	172	CCR2,CLC,FCER1G,FCGR2B,MICB,CCL20,VAV1,CR1,RSAD2,IL6,IL7R,IL10,LILRB1,NOD2,PTPRC,BTK,C3,LEP,NLRP3,CD28,CRTAM,TNFRSF1B
GO: Biological Process	GO:0050878	regulation of body fluid levels			4.423e-11	2.774e-07	8.864e-10	8.262e-09	40	548	PDGFRA,ACTN1,ADA,ADCY7,S100A9,FAP,FBLN1,FCER1G,PIK3CG,PLAUR,MAFF,MERTK,PLEK,VAV1,COL1A1,COL1A2,COL3A1,FLI1,VWF,COMP,APOE,MMRN1,IL6,GATA6,HPSE,KCNMA1,C3,GNA15,RAP2B,SH2B3,OAS2,LCP2,PAPSS2,ZFPM2,THBD,THBS1,CD36,TLR4,SERPINE1,LYN
GO: Biological Process	GO:0042102	positive regulation of T cell proliferation			5.043e-11	3.163e-07	1.007e-09	9.389e-09	18	112	HLA-DPA1,HLA-DPB1,LILRB2,CCR2,AIF1,CCL5,ANXA1,IGF1,PYCARD,IL6,RIPK2,PTPN22,PTPRC,LEP,CORO1A,CD28,CD86,NCKAP1L
GO: Biological Process	GO:1900046	regulation of hemostasis			6.151e-11	3.858e-07	1.225e-09	1.142e-08	16	86	PDGFRA,S100A9,FAP,FCER1G,PLAUR,PLEK,COMP,APOE,HPSE,SH2B3,THBD,THBS1,CD36,TLR4,SERPINE1,LYN
GO: Biological Process	GO:0052547	regulation of peptidase activity			6.238e-11	3.913e-07	1.234e-09	1.151e-08	37	483	SERPINF1,CLEC7A,S100A8,S100A9,FBLN1,PLAUR,MMP9,AIM2,COL6A3,FN1,PPARG,CR1,FAS,IGF1,CCN1,PYCARD,LAMP3,CSTA,CSTB,CTSD,IL6,LGMN,NAIP,RIPK2,PTGS2,C3,RARRES1,CASP1,GRN,NLRP3,THBS1,TIMP1,TIMP2,SERPINE1,CD44,LYN,PCOLCE
GO: Biological Process	GO:0051222	positive regulation of protein transport			6.238e-11	3.913e-07	1.234e-09	1.151e-08	37	483	CLEC5A,TWIST1,FCN1,AIF1,CCL2,FGR,MMP12,AIM2,RGCC,POSTN,ABCG1,IGF1,PYCARD,IL6,IL10,RIPK2,PTPN22,ITGAM,ITGB2,PTGS2,NOD2,CD84,IL33,RAC2,CASP1,LEP,NLRP3,CD14,CD33,CD36,CD38,TLR1,TLR2,TLR4,CRTAM,TREM2,HCLS1
GO: Biological Process	GO:0048002	antigen processing and presentation of peptide antigen			6.556e-11	4.112e-07	1.293e-09	1.205e-08	23	194	HLA-DMA,HLA-DPA1,HLA-DPB1,HLA-DQB1,HLA-DRA,HLA-DRB4,FCER1G,FCGR1B,FCGR2B,PYCARD,CTSD,CTSL,CTSS,CYBB,LGMN,NCF2,NCF4,SEC24D,ERAP2,CLEC4A,MARCHF1,CD36,TREM2
GO: Biological Process	GO:0002367	cytokine production involved in immune response			6.838e-11	4.289e-07	1.345e-09	1.253e-08	18	114	HMOX1,CCR2,CLC,FCER1G,CCL20,RSAD2,IL6,IL10,LILRB1,NOD2,BTK,NLRP3,CD36,TLR2,TLR4,TREM1,IRAK3,TNFRSF1B
GO: Biological Process	GO:0001501	skeletal system development			7.474e-11	4.688e-07	1.465e-09	1.365e-08	41	582	PDGFRA,ACP5,CHI3L1,TWIST1,TYROBP,FBN1,MGP,COL14A1,MMP2,FGR,MMP9,COL1A1,COL1A2,COL3A1,FLI1,COL5A2,COL6A3,COL10A1,PRRX1,SFRP4,COMP,IGF1,CCN1,VCAN,RASSF2,LILRB1,CCN4,PTPRC,SULF1,SH2B3,EPYC,PAPSS2,LEP,LGALS3,TGFBI,THBS1,TIMP1,LOX,CD44,GREM1,LUM
GO: Biological Process	GO:0030168	platelet activation			9.314e-11	5.842e-07	1.82e-09	1.696e-08	21	163	PDGFRA,ACTN1,FCER1G,PIK3CG,MERTK,PLEK,VAV1,COL1A1,COL1A2,COL3A1,VWF,COMP,APOE,IL6,GNA15,RAP2B,SH2B3,LCP2,THBD,TLR4,LYN
GO: Biological Process	GO:1904018	positive regulation of vasculature development			9.348e-11	5.863e-07	1.821e-09	1.697e-08	26	253	HMOX1,CHI3L1,TWIST1,CCL5,CCL11,MMP9,ANXA1,CXCL8,CXCR2,CYBB,IL10,GATA6,ITGAX,ITGB2,PTGIS,PTGS2,SRPX2,C3,C3AR1,C5AR1,GRN,ADAM12,LGALS3,THBS1,SERPINE1,GREM1
GO: Biological Process	GO:0048878	chemical homeostasis			9.734e-11	6.105e-07	1.89e-09	1.762e-08	68	1334	ABCA1,CD52,CYBRD1,PDGFRA,SERPINF1,TCIRG1,HMOX1,ADCY7,FABP4,FABP5,CCR2,S100A8,S100A9,CLIC2,PIK3CG,UCP2,CXCL9,CCL2,FGF7,CCR1,CCL5,CCL7,CCR5,CCL8,CCL11,PLN,STEAP1,SFRP4,GPR65,SLC31A2,FPR1,FPR3,ICAM1,APOE,PPARG,AQP9,ABCG1,IGF1,IL6,SOAT1,CXCR2,SLAMF8,MYO5A,PTGDR,DCN,CCN4,PTPRC,ACKR3,KCNMA1,PYGL,C3AR1,GNA15,C5AR1,MCUB,NPC1,TBXAS1,DMXL2,CCRL2,GRN,MCOLN1,LEP,LGALS1,EDNRA,CORO1A,CD36,CD38,CYB5R4,LYN
GO: Biological Process	GO:0002285	lymphocyte activation involved in immune response			9.941e-11	6.235e-07	1.924e-09	1.794e-08	23	198	ADA,CCR2,FCER1G,FCGR2B,CCL20,ANXA1,ICAM1,DOCK10,IL6,IL10,RIPK2,LILRB1,PTPRC,GPR183,LCP1,LGALS1,NLRP3,LGALS3,CORO1A,CD28,CD86,TLR4,TNFAIP3
GO: Biological Process	GO:0072677	eosinophil migration			1.011e-10	6.339e-07	1.95e-09	1.818e-08	10	26	CD300A,HRH1,CCL2,CCL4,CCL5,CCL7,CCL8,CCL11,SCG2,LGALS3
GO: Biological Process	GO:0032677	regulation of interleukin-8 production			1.014e-10	6.358e-07	1.95e-09	1.818e-08	15	76	CLEC7A,TLR7,FCN1,ANXA1,PYCARD,IL10,PTPN22,NOD2,PTPRC,CD14,CD33,TLR1,TLR2,TLR4,SERPINE1
GO: Biological Process	GO:0071622	regulation of granulocyte chemotaxis			1.286e-10	8.065e-07	2.467e-09	2.299e-08	13	54	CCL2,CCL5,MPP1,SELL,CXCL8,CXCR2,NOD2,C3AR1,C5AR1,RAC2,EDNRA,THBS1,NCKAP1L
GO: Biological Process	GO:0002504	antigen processing and presentation of peptide or polysaccharide antigen via MHC class II			1.321e-10	8.287e-07	2.527e-09	2.355e-08	17	104	HLA-DMA,HLA-DPA1,HLA-DPB1,HLA-DQB1,HLA-DRA,HLA-DRB4,FCER1G,FCGR2B,PYCARD,CTSD,CTSL,CTSS,LGMN,SEC24D,MARCHF1,THBS1,TREM2
GO: Biological Process	GO:1904951	positive regulation of establishment of protein localization			1.419e-10	8.897e-07	2.704e-09	2.521e-08	38	521	CLEC5A,TWIST1,FCN1,AIF1,CCL2,FGR,MMP12,AIM2,RGCC,POSTN,ABCG1,IGF1,PYCARD,IL6,IL10,RIPK2,PTPN22,ITGAM,ITGB2,PTGS2,NOD2,CD84,IL33,RAC2,CASP1,LEP,NLRP3,CD14,CD33,CD36,CD38,TLR1,TLR2,GZMB,TLR4,CRTAM,TREM2,HCLS1
GO: Biological Process	GO:0032494	response to peptidoglycan			1.474e-10	9.244e-07	2.801e-09	2.611e-08	8	14	IL6,RIPK2,NOD2,C5AR1,NLRP3,TLR2,TREM2,IRAK3
GO: Biological Process	GO:0045619	regulation of lymphocyte differentiation			1.648e-10	1.034e-06	3.123e-09	2.911e-08	23	203	HLA-DMA,LILRB2,ADA,CCR2,CCL20,ANXA1,CR1,FAS,IL6,IL7R,SLAMF8,INHBA,RIPK2,PTPRC,BTK,LILRB4,NLRP3,EGR3,CD28,CD86,CD44,DUSP10,NCKAP1L
GO: Biological Process	GO:0030888	regulation of B cell proliferation			1.915e-10	1.201e-06	3.618e-09	3.372e-08	14	67	CD300A,ADA,TYROBP,FCGR2B,AHR,MNDA,IL10,PTPRC,BTK,GPR183,CD38,TLR4,LYN,NCKAP1L
GO: Biological Process	GO:0050728	negative regulation of inflammatory response			1.992e-10	1.249e-06	3.751e-09	3.496e-08	22	187	ACP5,SERPINF1,ADA,ADCY7,FCGR2B,AOAH,APOE,PPARG,IGF1,PYCARD,SLAMF8,IL10,PTGIS,NOD2,PTPRC,GRN,NLRP3,CD44,DUSP10,TNFAIP3,TNFAIP6,TNFRSF1B
GO: Biological Process	GO:0043303	mast cell degranulation			2.106e-10	1.321e-06	3.956e-09	3.687e-08	13	56	CD300A,HMOX1,ADGRE2,ADORA2B,FCER1G,PIK3CG,FGR,LAT2,MILR1,CD84,BTK,RAC2,LYN
GO: Biological Process	GO:0050766	positive regulation of phagocytosis			2.184e-10	1.37e-06	4.089e-09	3.811e-08	15	80	CLEC7A,FCER1G,FCGR2B,CCL2,MERTK,PPARG,PYCARD,NOD2,PTPRC,C3,DOCK2,RAB31,CD36,TREM2,NCKAP1L
GO: Biological Process	GO:0001906	cell killing			2.45e-10	1.537e-06	4.574e-09	4.264e-08	22	189	CFH,CLEC7A,TYROBP,S100A12,FCGR2B,MICB,CCL2,VAV1,ICAM1,SLAMF7,IL7R,IL10,ITGAM,LILRB1,PTPRC,C3,LEP,CORO1A,GZMB,CRTAM,TREM1,LYZ
GO: Biological Process	GO:0002279	mast cell activation involved in immune response			2.674e-10	1.677e-06	4.977e-09	4.639e-08	13	57	CD300A,HMOX1,ADGRE2,ADORA2B,FCER1G,PIK3CG,FGR,LAT2,MILR1,CD84,BTK,RAC2,LYN
GO: Biological Process	GO:0050851	antigen receptor-mediated signaling pathway			2.875e-10	1.803e-06	5.335e-09	4.973e-08	29	328	HLA-DPA1,HLA-DPB1,HLA-DQB1,CD300A,HLA-DRA,HLA-DRB4,ADA,FCGR2B,LPXN,MNDA,THEMIS2,LAT2,IGKC,IGLC1,FYB1,RIPK2,PTPN22,ITK,PTPRC,TRAT1,BTK,LILRB4,LCP2,LGALS3,CD28,CD38,TRBC1,LYN,NCKAP1L
GO: Biological Process	GO:0050869	negative regulation of B cell activation			2.884e-10	1.809e-06	5.336e-09	4.974e-08	11	37	CD300A,TYROBP,FCGR2B,MNDA,FAS,IL10,INHBA,SAMSN1,BTK,TNFAIP3,LYN
GO: Biological Process	GO:0032880	regulation of protein localization			2.902e-10	1.82e-06	5.353e-09	4.99e-08	62	1188	CLEC5A,TCIRG1,TWIST1,TYROBP,FBLN1,FCER1G,FCGR2B,FCN1,UCP2,AIF1,CCL2,CCL5,FGR,MMP12,AIM2,FN1,ANXA1,RGCC,APOE,POSTN,ABCG1,RSAD2,IGF1,SRGN,PYCARD,CTSD,IL6,LRRC15,IL10,MYO5A,RIPK2,PTPN22,ITGAM,ITGB2,LILRB1,PTGS2,NOD2,CD84,CCN4,IL33,RAC2,LILRB4,CASP1,LCP1,LEP,NLRP3,LGALS3,CD14,CD33,CD36,CD38,TLR1,TLR2,GZMB,TLR4,CRTAM,TREM2,TNFAIP3,TNFRSF1B,LYN,DCLK1,HCLS1
GO: Biological Process	GO:0009615	response to virus			2.989e-10	1.875e-06	5.498e-09	5.125e-08	30	350	ACTA2,TLR7,MICB,CXCL9,CCL4,CCL5,CCL8,CCL11,FGR,MMP12,AIM2,SAMHD1,RSAD2,PYCARD,IL6,MX2,PTPN22,ITGAX,LILRB1,PTPRC,IL33,OAS2,NLRP3,RNASE1,RNASE2,RNASE6,CD86,IRAK3,TNFAIP3,DCLK1
GO: Biological Process	GO:0002448	mast cell mediated immunity			3.378e-10	2.119e-06	6.195e-09	5.775e-08	13	58	CD300A,HMOX1,ADGRE2,ADORA2B,FCER1G,PIK3CG,FGR,LAT2,MILR1,CD84,BTK,RAC2,LYN
GO: Biological Process	GO:0032651	regulation of interleukin-1 beta production			3.439e-10	2.157e-06	6.289e-09	5.862e-08	16	96	ACP5,CLEC7A,TYROBP,AIM2,MNDA,IGF1,PYCARD,RIPK2,NOD2,CASP1,NLRP3,CD33,TLR2,TLR4,TREM2,TNFAIP3
GO: Biological Process	GO:0018108	peptidyl-tyrosine phosphorylation			3.667e-10	2.3e-06	6.686e-09	6.232e-08	33	420	EREG,PDGFRA,CD300A,FGF7,CCL5,FGR,MERTK,ICAM1,SLA,AREG,IGF1,IL6,RIPK2,PTPN22,SAMSN1,ITGB2,ITK,NRP2,NOD2,PTPRC,BTK,RAP2B,SH2B3,LEP,EDNRA,CD36,TLR4,CD44,TREM2,GREM1,LYN,HCK,HCLS1
GO: Biological Process	GO:0018212	peptidyl-tyrosine modification			4.404e-10	2.762e-06	8.006e-09	7.462e-08	33	423	EREG,PDGFRA,CD300A,FGF7,CCL5,FGR,MERTK,ICAM1,SLA,AREG,IGF1,IL6,RIPK2,PTPN22,SAMSN1,ITGB2,ITK,NRP2,NOD2,PTPRC,BTK,RAP2B,SH2B3,LEP,EDNRA,CD36,TLR4,CD44,TREM2,GREM1,LYN,HCK,HCLS1
GO: Biological Process	GO:0048245	eosinophil chemotaxis			4.629e-10	2.903e-06	8.391e-09	7.821e-08	9	22	HRH1,CCL2,CCL4,CCL5,CCL7,CCL8,CCL11,SCG2,LGALS3
GO: Biological Process	GO:0032945	negative regulation of mononuclear cell proliferation			5.348e-10	3.354e-06	9.611e-09	8.959e-08	15	85	CEBPB,LILRB2,CD300A,VSIG4,TYROBP,FCGR2B,GPNMB,MNDA,IL10,LILRB1,BTK,LST1,CD86,CD44,LYN
GO: Biological Process	GO:0050672	negative regulation of lymphocyte proliferation			5.348e-10	3.354e-06	9.611e-09	8.959e-08	15	85	CEBPB,LILRB2,CD300A,VSIG4,TYROBP,FCGR2B,GPNMB,MNDA,IL10,LILRB1,BTK,LST1,CD86,CD44,LYN
GO: Biological Process	GO:0030193	regulation of blood coagulation			5.348e-10	3.354e-06	9.611e-09	8.959e-08	15	85	PDGFRA,S100A9,FAP,FCER1G,PLAUR,PLEK,APOE,HPSE,SH2B3,THBD,THBS1,CD36,TLR4,SERPINE1,LYN
GO: Biological Process	GO:0060627	regulation of vesicle-mediated transport			8.53e-10	5.35e-06	1.529e-08	1.425e-07	41	631	CD300A,CLEC7A,HMOX1,ADGRE2,CCR2,ADORA2B,FCER1G,FCGR2B,CCL2,FGR,MERTK,SFRP4,ANXA1,APOC1,APOE,PPARG,PYCARD,MYO5A,PTAFR,ITGAM,ITGB2,LILRB1,NOD2,CD84,PTPRC,C3,RAC2,DOCK2,RAB31,LGALS3,CORO1A,MCTP1,CD14,CD36,TLR2,SERPINE1,TREM2,GREM1,LYN,HCK,NCKAP1L
GO: Biological Process	GO:0032609	interferon-gamma production			9.207e-10	5.775e-06	1.645e-08	1.534e-07	18	133	HLA-DPA1,HLA-DPB1,CLEC7A,TCIRG1,TLR7,CCR2,IRF8,PYCARD,IL10,INHBA,RIPK2,PTPN22,LILRB1,ITK,NOD2,IL33,CD14,TLR4
GO: Biological Process	GO:1903531	negative regulation of secretion by cell			9.552e-10	5.991e-06	1.702e-08	1.586e-07	25	261	CD300A,HMOX1,CCR2,FBLN1,FCGR2B,UCP2,FN1,ANXA1,RGCC,APOE,PPARG,RSAD2,SRGN,IL1RN,IL6,IL10,INHBA,PTPN22,LILRB1,CD84,IL33,LEP,NLRP3,TNFAIP3,TNFRSF1B
GO: Biological Process	GO:0051235	maintenance of location			9.939e-10	6.234e-06	1.766e-08	1.646e-07	30	368	ABCA1,PLIN2,S100A8,S100A9,FBN1,CLIC2,CXCL9,CCR5,PLN,APOE,PPARG,MSR1,ABCG1,SRGN,IL6,SOAT1,IL10,MYO5A,PTPRC,GM2A,C3,KDELR3,MCOLN1,LEP,LGALS1,EDNRA,LGALS3,CORO1A,CD36,LYN
GO: Biological Process	GO:0002495	antigen processing and presentation of peptide antigen via MHC class II			1.012e-09	6.345e-06	1.792e-08	1.671e-07	16	103	HLA-DMA,HLA-DPA1,HLA-DPB1,HLA-DQB1,HLA-DRA,HLA-DRB4,FCER1G,FCGR2B,PYCARD,CTSD,CTSL,CTSS,LGMN,SEC24D,MARCHF1,TREM2
GO: Biological Process	GO:2000106	regulation of leukocyte apoptotic process			1.172e-09	7.348e-06	2.07e-08	1.929e-07	16	104	ADA,FCER1G,CCL5,CCR5,MERTK,ANXA1,IL7R,CXCR2,IL10,LILRB1,NOD2,BTK,LGALS3,CD44,LYN,HCLS1
GO: Biological Process	GO:0044092	negative regulation of molecular function			1.216e-09	7.628e-06	2.143e-08	1.997e-07	66	1354	CD300A,CORO1C,SERPINF1,HMOX1,ADCY7,FABP4,TWIST1,CCR2,ADORA3,KCNE4,CLIC2,AHR,CCL5,PLAUR,PLEK,MMP9,PLN,AIM2,COL6A3,SFRP4,ANXA1,BAG2,GMFG,APOC1,APOE,PPARG,CR1,IGF1,PYCARD,LAMP3,CSTA,CSTB,IL1RN,MARCO,IL6,CTSZ,PHACTR1,IL10,NAIP,PTPN22,ITGA4,PTGIS,GEM,PTGS2,NOD2,PTPRC,C3,TIGAR,RARRES1,SH2B3,NUPR1,RGS1,RGS2,EDNRA,NLRP3,LGALS3,THBS1,TIMP1,TIMP2,SERPINE1,CD44,IRAK3,DUSP10,TNFAIP3,LYN,NCKAP1L
GO: Biological Process	GO:0150077	regulation of neuroinflammatory response			1.307e-09	8.196e-06	2.296e-08	2.14e-07	11	42	MMP9,PPARG,IGF1,IL6,PTGS2,PTPRC,IL33,GRN,NUPR1,TREM2,TNFRSF1B
GO: Biological Process	GO:0006873	cellular ion homeostasis			1.41e-09	8.844e-06	2.47e-08	2.303e-07	45	748	CD52,CYBRD1,PDGFRA,TCIRG1,HMOX1,CCR2,S100A8,S100A9,CLIC2,PIK3CG,CXCL9,CCL2,CCR1,CCL5,CCL7,CCR5,CCL8,CCL11,PLN,GPR65,SLC31A2,FPR1,FPR3,APOE,CXCR2,SLAMF8,MYO5A,PTGDR,PTPRC,ACKR3,KCNMA1,C3AR1,GNA15,C5AR1,MCUB,TBXAS1,DMXL2,CCRL2,GRN,MCOLN1,EDNRA,CORO1A,CD36,CD38,LYN
GO: Biological Process	GO:0019725	cellular homeostasis			1.439e-09	9.026e-06	2.514e-08	2.343e-07	57	1088	CD52,CYBRD1,PDGFRA,SERPINF1,TCIRG1,HMOX1,CCR2,S100A8,S100A9,CLIC2,PIK3CG,UCP2,CXCL9,CCL2,CCR1,CCL5,CCL7,CCR5,CCL8,CCL11,PLN,GPR65,SLC31A2,FPR1,FPR3,ICAM1,APOE,IGF1,IL6,SH3BGRL3,CXCR2,CYBB,SLAMF8,MYO5A,NCF2,NCF4,PTGDR,PTPRC,ACKR3,KCNMA1,C3AR1,GNA15,C5AR1,MCUB,RAC2,TBXAS1,DMXL2,CCRL2,GRN,MCOLN1,LGALS1,EDNRA,CORO1A,LOX,CD36,CD38,LYN
GO: Biological Process	GO:0050818	regulation of coagulation			1.444e-09	9.057e-06	2.516e-08	2.345e-07	15	91	PDGFRA,S100A9,FAP,FCER1G,PLAUR,PLEK,APOE,HPSE,SH2B3,THBD,THBS1,CD36,TLR4,SERPINE1,LYN
GO: Biological Process	GO:0032720	negative regulation of tumor necrosis factor production			1.604e-09	1.006e-05	2.787e-08	2.598e-07	14	78	ACP5,TWIST1,GPNMB,IGF1,IL10,PTPN22,LILRB1,NOD2,CLEC4A,CD33,TLR4,TREM2,IRAK3,TNFAIP3
GO: Biological Process	GO:0009595	detection of biotic stimulus			1.792e-09	1.124e-05	3.105e-08	2.894e-07	9	25	CLEC7A,LY96,NOD2,NLRP3,TLR1,TLR2,TLR4,CRTAM,TREM2
GO: Biological Process	GO:0002673	regulation of acute inflammatory response			1.812e-09	1.136e-05	3.131e-08	2.918e-07	12	54	FCER1G,FCGR2B,PIK3CG,CCL5,ALOX5AP,PPARG,IL6,PTGS2,BTK,C3,NLRP3,OSMR
GO: Biological Process	GO:0032615	interleukin-12 production			1.863e-09	1.169e-05	3.21e-08	2.992e-07	13	66	ACP5,CLEC7A,IRF8,IL10,RIPK2,LILRB1,NOD2,LEP,THBS1,CD36,TLR2,TLR4,IRAK3
GO: Biological Process	GO:2000146	negative regulation of cell motility			1.872e-09	1.174e-05	3.217e-08	2.999e-07	30	378	CD300A,CORO1C,SERPINF1,HMOX1,ADA,ADORA3,FBLN1,AIF1,CCL2,COL3A1,RGCC,APOE,PPARG,FAS,ARHGDIB,IL1RN,SLAMF8,DCN,SULF1,NAV3,IL33,DPYSL3,RAP2B,EMILIN1,THBS1,MCTP1,TIMP1,SERPINE1,DUSP10,GREM1
GO: Biological Process	GO:0030162	regulation of proteolysis			2.02e-09	1.267e-05	3.461e-08	3.226e-07	46	784	SERPINF1,CLEC7A,S100A8,S100A9,FBLN1,SPON1,PLAUR,MMP9,AIM2,COL6A3,FN1,BAG2,APOE,PPARG,CR1,FAS,IGF1,CCN1,PYCARD,LAMP3,CSTA,CSTB,CTSD,IL6,CTSZ,IL10,LGMN,NAIP,RIPK2,PTGS2,C3,IL33,RARRES1,CASP1,GRN,NUPR1,NLRP3,THBS1,TIMP1,TIMP2,SERPINE1,CD44,TREM2,TNFRSF1B,LYN,PCOLCE
GO: Biological Process	GO:0030099	myeloid cell differentiation			2.113e-09	1.325e-05	3.611e-08	3.366e-07	34	474	CEBPB,CLEC5A,TCIRG1,EVI2B,ACTN1,TYROBP,FBN1,FCER1G,CCR1,CCL5,GPR171,MMP9,FLI1,IRF8,PPARG,FAS,INHBA,RASSF2,ITGAM,LILRB1,CCN4,LILRB4,SH2B3,GPR183,LEP,LGALS3,THBS1,LOX,TLR2,TLR4,TREM2,LYN,HCLS1,NCKAP1L
GO: Biological Process	GO:0090022	regulation of neutrophil chemotaxis			2.128e-09	1.335e-05	3.627e-08	3.381e-07	10	34	MPP1,SELL,CXCL8,CXCR2,NOD2,C3AR1,C5AR1,RAC2,EDNRA,NCKAP1L
GO: Biological Process	GO:0052548	regulation of endopeptidase activity			2.238e-09	1.404e-05	3.805e-08	3.546e-07	33	451	SERPINF1,CLEC7A,S100A8,S100A9,PLAUR,MMP9,AIM2,COL6A3,PPARG,CR1,FAS,IGF1,CCN1,PYCARD,LAMP3,CSTA,CSTB,CTSD,IL6,LGMN,NAIP,RIPK2,PTGS2,C3,RARRES1,CASP1,NLRP3,THBS1,TIMP1,TIMP2,SERPINE1,CD44,LYN
GO: Biological Process	GO:1903556	negative regulation of tumor necrosis factor superfamily cytokine production			2.269e-09	1.423e-05	3.847e-08	3.586e-07	14	80	ACP5,TWIST1,GPNMB,IGF1,IL10,PTPN22,LILRB1,NOD2,CLEC4A,CD33,TLR4,TREM2,IRAK3,TNFAIP3
GO: Biological Process	GO:0050673	epithelial cell proliferation			2.302e-09	1.444e-05	3.891e-08	3.627e-07	35	500	EREG,CEBPB,SERPINF1,HMOX1,TWIST1,ADORA2B,FAP,CCL2,FGF7,CCL5,CCL11,MMP12,COL8A1,COL8A2,RGCC,APOE,PPARG,AREG,IGF1,IL6,IL10,ITGA4,NRP2,NOD2,SULF1,SCG2,C5AR1,GRN,NUPR1,LEP,EDNRA,THBS1,EGR3,DUSP10,TNFAIP3
GO: Biological Process	GO:0030003	cellular cation homeostasis			2.426e-09	1.522e-05	4.09e-08	3.813e-07	44	734	CD52,CYBRD1,PDGFRA,TCIRG1,HMOX1,CCR2,S100A8,S100A9,CLIC2,PIK3CG,CXCL9,CCL2,CCR1,CCL5,CCL7,CCR5,CCL8,CCL11,PLN,GPR65,SLC31A2,FPR1,FPR3,APOE,CXCR2,SLAMF8,MYO5A,PTGDR,PTPRC,ACKR3,KCNMA1,C3AR1,GNA15,C5AR1,MCUB,DMXL2,CCRL2,GRN,MCOLN1,EDNRA,CORO1A,CD36,CD38,LYN
GO: Biological Process	GO:0051093	negative regulation of developmental process			2.466e-09	1.547e-05	4.147e-08	3.865e-07	60	1194	ABCA1,EREG,CORO1C,SERPINF1,PLAC8,TWIST1,CCR2,FBLN1,FBN1,FCGR2B,AHR,CCL2,CCR1,CCL11,GPR171,MMP9,COL3A1,COL5A1,COL5A2,ANXA1,RGCC,APOE,PPARG,FAS,AREG,POSTN,ARHGDIB,ABCG1,IGF1,SRGN,IL6,CTSZ,LGMN,INHBA,ASPN,DCN,LILRB1,STK4,CCN4,SULF1,LILRB4,DPYSL3,EMILIN1,RGS2,LEP,LGALS1,ZFPM2,THBS1,THBS2,TIMP1,CD86,CD36,CD38,TLR2,TLR4,SERPINE1,CD44,DUSP10,GREM1,LYN
GO: Biological Process	GO:0051048	negative regulation of secretion			2.614e-09	1.639e-05	4.383e-08	4.085e-07	26	295	CD300A,HMOX1,ADA,CCR2,FBLN1,FCGR2B,UCP2,FN1,ANXA1,RGCC,APOE,PPARG,RSAD2,SRGN,IL1RN,IL6,IL10,INHBA,PTPN22,LILRB1,CD84,IL33,LEP,NLRP3,TNFAIP3,TNFRSF1B
GO: Biological Process	GO:0030336	negative regulation of cell migration			2.837e-09	1.78e-05	4.745e-08	4.423e-07	29	362	CD300A,CORO1C,SERPINF1,HMOX1,ADA,ADORA3,AIF1,CCL2,COL3A1,RGCC,APOE,PPARG,FAS,ARHGDIB,IL1RN,SLAMF8,DCN,SULF1,NAV3,IL33,DPYSL3,RAP2B,EMILIN1,THBS1,MCTP1,TIMP1,SERPINE1,DUSP10,GREM1
GO: Biological Process	GO:0006875	cellular metal ion homeostasis			2.904e-09	1.822e-05	4.845e-08	4.516e-07	41	658	CD52,CYBRD1,PDGFRA,TCIRG1,HMOX1,CCR2,S100A8,S100A9,CLIC2,PIK3CG,CXCL9,CCL2,CCR1,CCL5,CCL7,CCR5,CCL8,CCL11,PLN,GPR65,SLC31A2,FPR1,FPR3,APOE,CXCR2,MYO5A,PTGDR,PTPRC,ACKR3,KCNMA1,C3AR1,GNA15,C5AR1,MCUB,CCRL2,MCOLN1,EDNRA,CORO1A,CD36,CD38,LYN
GO: Biological Process	GO:0042533	tumor necrosis factor biosynthetic process			2.921e-09	1.832e-05	4.847e-08	4.518e-07	10	35	CLEC7A,CCR2,TYROBP,CYBB,IL10,LILRB1,THBS1,TLR1,TLR2,TLR4
GO: Biological Process	GO:0042534	regulation of tumor necrosis factor biosynthetic process			2.921e-09	1.832e-05	4.847e-08	4.518e-07	10	35	CLEC7A,CCR2,TYROBP,CYBB,IL10,LILRB1,THBS1,TLR1,TLR2,TLR4
GO: Biological Process	GO:0045428	regulation of nitric oxide biosynthetic process			3.177e-09	1.993e-05	5.258e-08	4.901e-07	14	82	ACP5,CLEC7A,HRH1,AIF1,ICAM1,IGF1,IL6,IL10,ITGB2,PTGIS,PTGS2,CD36,TLR2,TLR4
GO: Biological Process	GO:0050801	ion homeostasis			3.325e-09	2.086e-05	5.488e-08	5.116e-07	50	909	ABCA1,CD52,CYBRD1,PDGFRA,TCIRG1,HMOX1,CCR2,S100A8,S100A9,CLIC2,PIK3CG,CXCL9,CCL2,CCR1,CCL5,CCL7,CCR5,CCL8,CCL11,PLN,STEAP1,SFRP4,GPR65,SLC31A2,FPR1,FPR3,APOE,ABCG1,CXCR2,SLAMF8,MYO5A,PTGDR,DCN,PTPRC,ACKR3,KCNMA1,C3AR1,GNA15,C5AR1,MCUB,TBXAS1,DMXL2,CCRL2,GRN,MCOLN1,EDNRA,CORO1A,CD36,CD38,LYN
GO: Biological Process	GO:0072503	cellular divalent inorganic cation homeostasis			3.608e-09	2.263e-05	5.94e-08	5.537e-07	37	559	CD52,PDGFRA,TCIRG1,CCR2,S100A8,S100A9,CLIC2,PIK3CG,CXCL9,CCL2,CCR1,CCL5,CCL7,CCR5,CCL8,CCL11,PLN,GPR65,FPR1,FPR3,APOE,CXCR2,MYO5A,PTGDR,PTPRC,ACKR3,C3AR1,GNA15,C5AR1,MCUB,CCRL2,MCOLN1,EDNRA,CORO1A,CD36,CD38,LYN
GO: Biological Process	GO:0002576	platelet degranulation			3.631e-09	2.277e-05	5.962e-08	5.557e-07	17	128	ACTN1,FCER1G,PLEK,VWF,FN1,PPBP,MMRN1,IGF1,SRGN,ISLR,CFD,THBS1,TIMP1,CD36,SERPINE1,LHFPL2,LYN
GO: Biological Process	GO:0006925	inflammatory cell apoptotic process			3.952e-09	2.479e-05	6.455e-08	6.017e-07	9	27	CCL5,CCR5,ANXA1,FAS,CTSL,IL6,CXCR2,NOD2,CD44
GO: Biological Process	GO:0071677	positive regulation of mononuclear cell migration			3.952e-09	2.479e-05	6.455e-08	6.017e-07	9	27	CCR2,AIF1,CCL2,CCR1,CCL5,LGMN,PLA2G7,LGALS3,SERPINE1
GO: Biological Process	GO:0010574	regulation of vascular endothelial growth factor production			3.965e-09	2.487e-05	6.459e-08	6.021e-07	10	36	CCR2,ADORA2B,CCL2,IL6,HPSE,PTGS2,SULF1,C3,C3AR1,C5AR1
GO: Biological Process	GO:0032653	regulation of interleukin-10 production			4.348e-09	2.727e-05	7.064e-08	6.585e-07	12	58	CLEC7A,TYROBP,FCER1G,FCGR2B,PYCARD,LILRB1,NOD2,CD84,CD28,TLR2,TLR4,TREM2
GO: Biological Process	GO:0051271	negative regulation of cellular component movement			4.524e-09	2.837e-05	7.332e-08	6.834e-07	31	416	CD300A,CORO1C,SERPINF1,ACTN1,HMOX1,ADA,ADORA3,FBLN1,AIF1,CCL2,COL3A1,RGCC,APOE,PPARG,FAS,ARHGDIB,IL1RN,SLAMF8,DCN,SULF1,NAV3,IL33,DPYSL3,RAP2B,EMILIN1,THBS1,MCTP1,TIMP1,SERPINE1,DUSP10,GREM1
GO: Biological Process	GO:1902622	regulation of neutrophil migration			4.811e-09	3.018e-05	7.777e-08	7.249e-07	11	47	MPP1,SELL,CXCL8,CXCR2,SLAMF8,NOD2,C3AR1,C5AR1,RAC2,EDNRA,NCKAP1L
GO: Biological Process	GO:0002755	MyD88-dependent toll-like receptor signaling pathway			5.326e-09	3.341e-05	8.588e-08	8.005e-07	10	37	CD300A,TLR7,LY96,BTK,CD14,CD36,TLR1,TLR2,TLR4,IRAK3
GO: Biological Process	GO:0090026	positive regulation of monocyte chemotaxis			5.499e-09	3.449e-05	8.843e-08	8.243e-07	8	20	CCR2,AIF1,CCL2,CCR1,CCL5,LGMN,PLA2G7,SERPINE1
GO: Biological Process	GO:0098771	inorganic ion homeostasis			5.58e-09	3.5e-05	8.95e-08	8.343e-07	47	838	CD52,CYBRD1,PDGFRA,TCIRG1,HMOX1,CCR2,S100A8,S100A9,CLIC2,PIK3CG,CXCL9,CCL2,CCR1,CCL5,CCL7,CCR5,CCL8,CCL11,PLN,STEAP1,SFRP4,GPR65,SLC31A2,FPR1,FPR3,APOE,CXCR2,SLAMF8,MYO5A,PTGDR,PTPRC,ACKR3,KCNMA1,C3AR1,GNA15,C5AR1,MCUB,TBXAS1,DMXL2,CCRL2,GRN,MCOLN1,EDNRA,CORO1A,CD36,CD38,LYN
GO: Biological Process	GO:0045621	positive regulation of lymphocyte differentiation			6.014e-09	3.772e-05	9.622e-08	8.969e-07	16	116	HLA-DMA,LILRB2,ADA,CCR2,ANXA1,IL6,IL7R,RIPK2,PTPRC,BTK,LILRB4,NLRP3,EGR3,CD86,DUSP10,NCKAP1L
GO: Biological Process	GO:0045580	regulation of T cell differentiation			6.087e-09	3.818e-05	9.714e-08	9.055e-07	19	167	HLA-DMA,LILRB2,ADA,CCR2,CCL20,ANXA1,CR1,IL6,IL7R,RIPK2,PTPRC,LILRB4,NLRP3,EGR3,CD28,CD86,CD44,DUSP10,NCKAP1L
GO: Biological Process	GO:0055082	cellular chemical homeostasis			6.111e-09	3.833e-05	9.728e-08	9.068e-07	50	926	CD52,CYBRD1,PDGFRA,SERPINF1,TCIRG1,HMOX1,CCR2,S100A8,S100A9,CLIC2,PIK3CG,UCP2,CXCL9,CCL2,CCR1,CCL5,CCL7,CCR5,CCL8,CCL11,PLN,GPR65,SLC31A2,FPR1,FPR3,ICAM1,APOE,IGF1,CXCR2,SLAMF8,MYO5A,PTGDR,PTPRC,ACKR3,KCNMA1,C3AR1,GNA15,C5AR1,MCUB,TBXAS1,DMXL2,CCRL2,GRN,MCOLN1,LGALS1,EDNRA,CORO1A,CD36,CD38,LYN
GO: Biological Process	GO:0010573	vascular endothelial growth factor production			7.087e-09	4.445e-05	1.125e-07	1.049e-06	10	38	CCR2,ADORA2B,CCL2,IL6,HPSE,PTGS2,SULF1,C3,C3AR1,C5AR1
GO: Biological Process	GO:0045582	positive regulation of T cell differentiation			7.351e-09	4.611e-05	1.164e-07	1.085e-06	15	102	HLA-DMA,LILRB2,ADA,CCR2,ANXA1,IL6,IL7R,RIPK2,PTPRC,LILRB4,NLRP3,EGR3,CD86,DUSP10,NCKAP1L
GO: Biological Process	GO:1904019	epithelial cell apoptotic process			7.377e-09	4.627e-05	1.165e-07	1.086e-06	17	134	HMOX1,PIK3CG,CCL2,SFRP4,ICAM1,RGCC,FAS,IGF1,IL6,IL10,ITGA4,STK4,SCG2,NUPR1,THBS1,SERPINE1,TNFAIP3
GO: Biological Process	GO:0006874	cellular calcium ion homeostasis			7.711e-09	4.836e-05	1.215e-07	1.133e-06	35	524	CD52,PDGFRA,TCIRG1,CCR2,CLIC2,PIK3CG,CXCL9,CCL2,CCR1,CCL5,CCL7,CCR5,CCL8,CCL11,PLN,GPR65,FPR1,FPR3,APOE,CXCR2,MYO5A,PTGDR,PTPRC,ACKR3,C3AR1,GNA15,C5AR1,MCUB,CCRL2,MCOLN1,EDNRA,CORO1A,CD36,CD38,LYN
GO: Biological Process	GO:0032649	regulation of interferon-gamma production			7.739e-09	4.854e-05	1.216e-07	1.134e-06	16	118	HLA-DPA1,HLA-DPB1,CLEC7A,TLR7,CCR2,IRF8,PYCARD,IL10,INHBA,RIPK2,PTPN22,LILRB1,NOD2,IL33,CD14,TLR4
GO: Biological Process	GO:0034121	regulation of toll-like receptor signaling pathway			8.116e-09	5.091e-05	1.273e-07	1.186e-06	13	74	CD300A,LY96,RSAD2,PTPN22,NOD2,CD14,CD36,TLR1,TLR2,TLR4,IRAK3,TNFAIP3,LYN
GO: Biological Process	GO:0042100	B cell proliferation			8.432e-09	5.289e-05	1.319e-07	1.229e-06	15	103	CD300A,ADA,TYROBP,FCGR2B,AHR,MNDA,IL7R,IL10,PTPRC,BTK,GPR183,CD38,TLR4,LYN,NCKAP1L
GO: Biological Process	GO:0042535	positive regulation of tumor necrosis factor biosynthetic process			8.711e-09	5.464e-05	1.359e-07	1.267e-06	8	21	CLEC7A,CCR2,TYROBP,CYBB,THBS1,TLR1,TLR2,TLR4
GO: Biological Process	GO:0045597	positive regulation of cell differentiation			9.235e-09	5.792e-05	1.437e-07	1.34e-06	58	1176	CEBPB,HLA-DMA,LILRB2,SERPINF1,CLEC7A,EVI2B,ADA,TWIST1,CCR2,S100A9,TYROBP,CXCL9,CCR1,CCL5,COL1A1,SFRP4,FN1,ANXA1,RGCC,APOE,PPARG,MSR1,IGF1,CCN1,IL6,IL7R,INHBA,RIPK2,GATA6,PTGS2,ZEB2,STK4,CCN4,PTPRC,BTK,LILRB4,DPYSL3,GRN,RGS2,LEP,LGALS1,NLRP3,LGALS3,TIMP2,EGR3,PLXNC1,CD86,CD36,TLR2,SERPINE1,TREM2,CD53,DUSP10,GREM1,TNFRSF1B,LYN,HCLS1,NCKAP1L
GO: Biological Process	GO:0033028	myeloid cell apoptotic process			9.343e-09	5.86e-05	1.45e-07	1.352e-06	10	39	CLEC5A,FCER1G,CCL5,CCR5,ANXA1,CTSL,IL6,CXCR2,NOD2,CD44
GO: Biological Process	GO:0032655	regulation of interleukin-12 production			9.719e-09	6.096e-05	1.505e-07	1.403e-06	12	62	ACP5,CLEC7A,IRF8,IL10,RIPK2,LILRB1,NOD2,THBS1,CD36,TLR2,TLR4,IRAK3
GO: Biological Process	GO:0048872	homeostasis of number of cells			1.03e-08	6.458e-05	1.591e-07	1.483e-06	26	315	TCIRG1,HMOX1,ADA,CCR2,FCER1G,AHR,CCL2,COL14A1,MERTK,ANXA1,DOCK10,FAS,IL6,IL7R,CXCR2,INHBA,RASSF2,SH2B3,GPR183,CORO1A,LIPA,CD44,TNFAIP3,LYN,HCLS1,NCKAP1L
GO: Biological Process	GO:0002821	positive regulation of adaptive immune response			1.119e-08	7.016e-05	1.724e-07	1.607e-06	16	121	HLA-DMA,ADA,CCR2,FCER1G,ANXA1,RSAD2,PYCARD,IL6,RIPK2,NOD2,PTPRC,BTK,C3,NLRP3,CD28,CD44
GO: Biological Process	GO:0050678	regulation of epithelial cell proliferation			1.159e-08	7.269e-05	1.782e-07	1.661e-06	31	433	EREG,SERPINF1,HMOX1,TWIST1,ADORA2B,CCL2,FGF7,CCL5,CCL11,MMP12,RGCC,APOE,PPARG,AREG,IGF1,IL6,IL10,ITGA4,NRP2,NOD2,SULF1,SCG2,C5AR1,GRN,NUPR1,LEP,EDNRA,THBS1,EGR3,DUSP10,TNFAIP3
GO: Biological Process	GO:0032613	interleukin-10 production			1.177e-08	7.38e-05	1.804e-07	1.682e-06	12	63	CLEC7A,TYROBP,FCER1G,FCGR2B,PYCARD,LILRB1,NOD2,CD84,CD28,TLR2,TLR4,TREM2
GO: Biological Process	GO:0072507	divalent inorganic cation homeostasis			1.208e-08	7.574e-05	1.847e-07	1.722e-06	37	585	CD52,PDGFRA,TCIRG1,CCR2,S100A8,S100A9,CLIC2,PIK3CG,CXCL9,CCL2,CCR1,CCL5,CCL7,CCR5,CCL8,CCL11,PLN,GPR65,FPR1,FPR3,APOE,CXCR2,MYO5A,PTGDR,PTPRC,ACKR3,C3AR1,GNA15,C5AR1,MCUB,CCRL2,MCOLN1,EDNRA,CORO1A,CD36,CD38,LYN
GO: Biological Process	GO:0050730	regulation of peptidyl-tyrosine phosphorylation			1.255e-08	7.872e-05	1.915e-07	1.785e-06	25	296	EREG,PDGFRA,CD300A,FGF7,CCL5,ICAM1,AREG,IGF1,IL6,RIPK2,PTPN22,SAMSN1,ITGB2,NOD2,PTPRC,RAP2B,SH2B3,LEP,CD36,TLR4,CD44,TREM2,GREM1,LYN,HCLS1
GO: Biological Process	GO:0032732	positive regulation of interleukin-1 production			1.419e-08	8.903e-05	2.147e-07	2.002e-06	12	64	CLEC7A,TYROBP,CCL20,AIM2,MNDA,PYCARD,RIPK2,NOD2,CASP1,NLRP3,TLR2,TLR4
GO: Biological Process	GO:0043030	regulation of macrophage activation			1.419e-08	8.903e-05	2.147e-07	2.002e-06	12	64	VSIG4,FCGR2B,PPARG,IL6,IL10,CD84,PTPRC,IL33,GRN,THBS1,TLR4,TREM2
GO: Biological Process	GO:0019722	calcium-mediated signaling			1.42e-08	8.905e-05	2.147e-07	2.002e-06	23	255	ADA,CCR2,CLIC2,CCR1,CCL4,CCR5,CCL20,PLEK,PLN,LAT2,LMCD1,IGF1,CXCL8,CXCR2,MYO5A,PTPRC,TRAT1,ACKR3,BTK,CCRL2,MCOLN1,MCTP1,TREM2
GO: Biological Process	GO:0001909	leukocyte mediated cytotoxicity			1.421e-08	8.913e-05	2.147e-07	2.002e-06	16	123	TYROBP,FCGR2B,MICB,CCL2,VAV1,ICAM1,SLAMF7,IL7R,ITGAM,LILRB1,PTPRC,LEP,CORO1A,GZMB,CRTAM,TREM1
GO: Biological Process	GO:0072593	reactive oxygen species metabolic process			1.424e-08	8.933e-05	2.147e-07	2.002e-06	26	320	ACP5,CLEC7A,TYROBP,HRH1,AIF1,VAV1,ICAM1,IGF1,CCN1,IL6,CYBB,IL10,NCF2,NCF4,ITGAM,ITGB2,PTGIS,PTGS2,RAC2,TIGAR,LEP,THBS1,CD36,TLR2,TLR4,CYB5R4
GO: Biological Process	GO:0060333	interferon-gamma-mediated signaling pathway			1.488e-08	9.332e-05	2.238e-07	2.086e-06	14	92	HLA-DPA1,HLA-DPB1,HLA-DQB1,HLA-DRA,HLA-DRB4,FCGR1B,ICAM1,IRF8,PPARG,GBP2,PTAFR,OAS2,CD44,HCK
GO: Biological Process	GO:0033003	regulation of mast cell activation			1.51e-08	9.471e-05	2.266e-07	2.112e-06	11	52	CD300A,HMOX1,ADGRE2,ADORA2B,FCER1G,FGR,MILR1,CD84,PTPRE,RAC2,LYN
GO: Biological Process	GO:0071495	cellular response to endogenous stimulus			1.586e-08	9.947e-05	2.374e-07	2.213e-06	69	1541	CEBPB,PDGFRA,SERPINF1,TCIRG1,ADCY7,FBN1,FCGR2B,PIK3CG,AHR,HRH1,AIF1,CCL2,FGF7,CCL5,MMP2,COL1A1,COL1A2,COL3A1,COL5A2,SFRP4,COL16A1,COMP,ANXA1,FOLR2,ICAM1,PPARG,AQP9,POSTN,IGF1,CCN1,CTSL,CTSS,CXCL8,CYBB,IL10,LGMN,MYO5A,INHBA,ASPN,RIPK2,GATA6,PTPN22,NCF2,ITGA4,PTAFR,PTGDR,PTGS2,NOD2,PTPRE,SULF1,GNA15,NPC1,TIGAR,RAB31,EMILIN1,LEP,NLRP3,CORO1A,THBS1,EGR3,LOX,CD36,TLR2,TLR4,SERPINE1,CD44,TREM2,GREM1,LYN
GO: Biological Process	GO:0002478	antigen processing and presentation of exogenous peptide antigen			1.596e-08	0.0001001	2.383e-07	2.221e-06	19	177	HLA-DMA,HLA-DPA1,HLA-DPB1,HLA-DQB1,HLA-DRA,HLA-DRB4,FCER1G,FCGR1B,FCGR2B,CTSD,CTSL,CTSS,CYBB,LGMN,NCF2,NCF4,SEC24D,CLEC4A,CD36
GO: Biological Process	GO:0006809	nitric oxide biosynthetic process			1.716e-08	0.0001077	2.557e-07	2.384e-06	14	93	ACP5,CLEC7A,HRH1,AIF1,ICAM1,IGF1,IL6,IL10,ITGB2,PTGIS,PTGS2,CD36,TLR2,TLR4
GO: Biological Process	GO:0043269	regulation of ion transport			1.727e-08	0.0001083	2.565e-07	2.391e-06	45	812	CEBPB,LILRB2,CD300A,TCIRG1,TWIST1,CCR2,KCNE4,CLIC2,PIK3CG,CXCL9,AHR,CCL2,CCR1,CCL4,CCL5,MMP9,PLN,ALOX5,SFRP4,SLC31A2,ICAM1,APOE,IGF1,IL1RN,CTSS,CYBB,MYO5A,FXYD5,PTPN22,PTAFR,LILRB1,GEM,PTGS2,CD84,KCNMA1,RGS2,LEP,EDNRA,LGALS3,CORO1A,THBS1,CD33,SERPINE1,TREM2,LYN
GO: Biological Process	GO:0055074	calcium ion homeostasis			1.73e-08	0.0001085	2.565e-07	2.391e-06	35	541	CD52,PDGFRA,TCIRG1,CCR2,CLIC2,PIK3CG,CXCL9,CCL2,CCR1,CCL5,CCL7,CCR5,CCL8,CCL11,PLN,GPR65,FPR1,FPR3,APOE,CXCR2,MYO5A,PTGDR,PTPRC,ACKR3,C3AR1,GNA15,C5AR1,MCUB,CCRL2,MCOLN1,EDNRA,CORO1A,CD36,CD38,LYN
GO: Biological Process	GO:0097435	supramolecular fiber organization			1.792e-08	0.0001124	2.651e-07	2.471e-06	42	729	PDGFRA,CORO1C,ACTN1,MFAP4,AIF1,COL14A1,CCL11,PLEK,COL1A1,COL1A2,COL3A1,COL5A1,COL5A2,GPR65,COMP,ICAM1,RGCC,GMFG,GAS7,APOE,RND3,PYCARD,PHACTR1,PDLIM3,NAV3,ARHGAP25,RAC2,DPYSL3,CAPG,LCP1,EMILIN1,ARPC1B,MFAP5,CORO1A,LOX,CD36,TLR2,GREM1,LUM,HCK,HCLS1,NCKAP1L
GO: Biological Process	GO:0002544	chronic inflammatory response			2.019e-08	0.0001266	2.979e-07	2.777e-06	8	23	CEBPB,S100A8,ADORA2B,CCL5,CCL11,IL10,THBS1,TNFAIP3
GO: Biological Process	GO:0002573	myeloid leukocyte differentiation			2.032e-08	0.0001274	2.991e-07	2.788e-06	22	239	CEBPB,TCIRG1,EVI2B,TYROBP,FBN1,FCER1G,CCR1,CCL5,MMP9,PPARG,INHBA,RASSF2,ITGAM,LILRB1,CCN4,LILRB4,GPR183,TLR2,TLR4,TREM2,LYN,HCLS1
GO: Biological Process	GO:0001503	ossification			2.072e-08	0.00013	3.044e-07	2.837e-06	31	444	CEBPB,CLEC5A,ACP5,TCIRG1,TWIST1,MGP,AHR,CCR1,GPNMB,MMP2,FGR,COL1A1,COL1A2,COL5A2,COMP,BMP2K,AREG,RSAD2,IGF1,CCN1,SRGN,VCAN,IL6,RASSF2,ASPN,PTGS2,CCN4,LEP,EGR2,LOX,GREM1
GO: Biological Process	GO:0110148	biomineralization			2.102e-08	0.0001318	3.073e-07	2.864e-06	19	180	CEBPB,TCIRG1,TWIST1,MGP,CCR1,GPNMB,FGR,COL1A1,COL1A2,COMP,BMP2K,IGF1,CCN1,SRGN,ASPN,PTGS2,LEP,LOX,GREM1
GO: Biological Process	GO:0031214	biomineral tissue development			2.102e-08	0.0001318	3.073e-07	2.864e-06	19	180	CEBPB,TCIRG1,TWIST1,MGP,CCR1,GPNMB,FGR,COL1A1,COL1A2,COMP,BMP2K,IGF1,CCN1,SRGN,ASPN,PTGS2,LEP,LOX,GREM1
GO: Biological Process	GO:0007229	integrin-mediated signaling pathway			2.107e-08	0.0001322	3.074e-07	2.865e-06	15	110	TYROBP,FBLN1,FCER1G,FGR,PLEK,VAV1,COL3A1,COL16A1,FYB1,ITGA4,ITGAM,ITGAX,ITGB2,TIMP1,HCK
GO: Biological Process	GO:0051607	defense response to virus			2.197e-08	0.0001378	3.197e-07	2.98e-06	23	261	TLR7,MICB,CXCL9,CCL5,MMP12,AIM2,SAMHD1,RSAD2,PYCARD,IL6,MX2,PTPN22,ITGAX,LILRB1,PTPRC,IL33,OAS2,NLRP3,RNASE1,RNASE2,RNASE6,CD86,TNFAIP3
GO: Biological Process	GO:0071223	cellular response to lipoteichoic acid			2.246e-08	0.0001409	3.254e-07	3.033e-06	6	10	RIPK2,CD14,CD36,TLR2,TLR4,TREM2
GO: Biological Process	GO:0070391	response to lipoteichoic acid			2.246e-08	0.0001409	3.254e-07	3.033e-06	6	10	RIPK2,CD14,CD36,TLR2,TLR4,TREM2
GO: Biological Process	GO:0002456	T cell mediated immunity			2.261e-08	0.0001418	3.268e-07	3.046e-06	16	127	CCR2,CLC,FCGR2B,MICB,CCL20,ICAM1,RSAD2,IL6,IL7R,LILRB1,NOD2,PTPRC,NLRP3,GZMB,CRTAM,TNFRSF1B
GO: Biological Process	GO:0043901	negative regulation of multi-organism process			2.363e-08	0.0001482	3.407e-07	3.176e-06	22	241	VSIG4,ADA,FBLN1,FCN1,MICB,CCL4,CCL5,CCL8,MMP12,SAMHD1,PPARG,CR1,ARHGDIB,RSAD2,IGF1,SLAMF8,LILRB1,GRN,TIMP1,IRAK3,DUSP10,TNFAIP3
GO: Biological Process	GO:0048771	tissue remodeling			2.455e-08	0.000154	3.532e-07	3.292e-06	21	221	ACP5,TCIRG1,CCR2,AHR,GPNMB,MMP2,MERTK,MMP9,ANXA1,IGF1,CTSS,IL6,RASSF2,ITGA4,RAC2,LEP,LIPA,TIMP1,CD38,TNFAIP3,GREM1
GO: Biological Process	GO:0031341	regulation of cell killing			2.702e-08	0.0001695	3.878e-07	3.615e-06	15	112	CFH,CLEC7A,TYROBP,FCGR2B,MICB,CCL2,VAV1,ICAM1,IL7R,IL10,ITGAM,LILRB1,PTPRC,LEP,CRTAM
GO: Biological Process	GO:0002792	negative regulation of peptide secretion			2.752e-08	0.0001726	3.941e-07	3.674e-06	19	183	FBLN1,FCGR2B,UCP2,FN1,ANXA1,RGCC,APOE,PPARG,RSAD2,SRGN,IL6,IL10,PTPN22,LILRB1,CD84,IL33,LEP,NLRP3,TNFAIP3
GO: Biological Process	GO:0055080	cation homeostasis			2.765e-08	0.0001734	3.951e-07	3.682e-06	45	825	CD52,CYBRD1,PDGFRA,TCIRG1,HMOX1,CCR2,S100A8,S100A9,CLIC2,PIK3CG,CXCL9,CCL2,CCR1,CCL5,CCL7,CCR5,CCL8,CCL11,PLN,STEAP1,GPR65,SLC31A2,FPR1,FPR3,APOE,CXCR2,SLAMF8,MYO5A,PTGDR,PTPRC,ACKR3,KCNMA1,C3AR1,GNA15,C5AR1,MCUB,DMXL2,CCRL2,GRN,MCOLN1,EDNRA,CORO1A,CD36,CD38,LYN
GO: Biological Process	GO:0032731	positive regulation of interleukin-1 beta production			2.817e-08	0.0001767	4.016e-07	3.743e-06	11	55	CLEC7A,TYROBP,AIM2,MNDA,PYCARD,RIPK2,NOD2,CASP1,NLRP3,TLR2,TLR4
GO: Biological Process	GO:0030282	bone mineralization			2.833e-08	0.0001777	4.029e-07	3.756e-06	16	129	TWIST1,MGP,CCR1,GPNMB,FGR,COL1A2,COMP,BMP2K,IGF1,CCN1,SRGN,ASPN,PTGS2,LEP,LOX,GREM1
GO: Biological Process	GO:0055065	metal ion homeostasis			2.843e-08	0.0001783	4.035e-07	3.761e-06	42	741	CD52,CYBRD1,PDGFRA,TCIRG1,HMOX1,CCR2,S100A8,S100A9,CLIC2,PIK3CG,CXCL9,CCL2,CCR1,CCL5,CCL7,CCR5,CCL8,CCL11,PLN,STEAP1,GPR65,SLC31A2,FPR1,FPR3,APOE,CXCR2,MYO5A,PTGDR,PTPRC,ACKR3,KCNMA1,C3AR1,GNA15,C5AR1,MCUB,CCRL2,MCOLN1,EDNRA,CORO1A,CD36,CD38,LYN
GO: Biological Process	GO:0090303	positive regulation of wound healing			2.905e-08	0.0001822	4.113e-07	3.833e-06	12	68	CLEC7A,S100A9,CCL2,PLEK,ANXA1,HPSE,CCN4,THBD,THBS1,CD36,TLR4,SERPINE1
GO: Biological Process	GO:0001667	ameboidal-type cell migration			2.931e-08	0.0001838	4.14e-07	3.859e-06	33	501	CORO1C,SERPINF1,ACTA2,HMOX1,TWIST1,ADORA2B,FAP,FGF7,MMP9,MMP12,FN1,ANXA1,RGCC,APOE,PPARG,ARHGDIB,IGF1,LGMN,ITGA4,DCN,ITGB2,PTGS2,ZEB2,NRP2,SRPX2,SCG2,GRN,THBS1,TIMP1,EGR3,SERPINE1,DUSP10,GREM1
GO: Biological Process	GO:0046209	nitric oxide metabolic process			2.985e-08	0.0001872	4.208e-07	3.922e-06	14	97	ACP5,CLEC7A,HRH1,AIF1,ICAM1,IGF1,IL6,IL10,ITGB2,PTGIS,PTGS2,CD36,TLR2,TLR4
GO: Biological Process	GO:0019884	antigen processing and presentation of exogenous antigen			3.007e-08	0.0001886	4.229e-07	3.942e-06	19	184	HLA-DMA,HLA-DPA1,HLA-DPB1,HLA-DQB1,HLA-DRA,HLA-DRB4,FCER1G,FCGR1B,FCGR2B,CTSD,CTSL,CTSS,CYBB,LGMN,NCF2,NCF4,SEC24D,CLEC4A,CD36
GO: Biological Process	GO:0002705	positive regulation of leukocyte mediated immunity			3.014e-08	0.000189	4.229e-07	3.942e-06	17	147	ADORA2B,FCER1G,MICB,FGR,VAV1,RSAD2,IL6,PTAFR,ITGAM,ITGB2,NOD2,PTPRC,BTK,C3,NLRP3,CD28,CRTAM
GO: Biological Process	GO:0046634	regulation of alpha-beta T cell activation			3.053e-08	0.0001915	4.274e-07	3.984e-06	15	113	CD300A,ADA,CCR2,CCL20,ANXA1,IL6,RIPK2,PTPN22,LILRB1,PTPRC,NLRP3,CD28,CD86,CD44,NCKAP1L
GO: Biological Process	GO:0071224	cellular response to peptidoglycan			3.098e-08	0.0001943	4.327e-07	4.033e-06	5	6	RIPK2,NOD2,NLRP3,TLR2,TREM2
GO: Biological Process	GO:0023057	negative regulation of signaling			3.348e-08	0.00021	4.666e-07	4.35e-06	71	1636	EREG,LILRB2,CD300A,HMOX1,LY96,ADA,ADCY7,TWIST1,FBLN1,FBN1,FCGR2B,CLIC2,UCP2,LPXN,CCL5,PLAUR,PLEK,MMP9,MMP12,SFRP4,ICAM1,SAMHD1,APOE,PPARG,FAS,AREG,IGF1,PYCARD,IL1RN,MARCO,IL6,CXCL8,IL10,LGMN,INHBA,RASSF2,ASPN,PTPN22,BCL2A1,DCN,PTGS2,NOD2,STK4,PTPRC,PTPRE,TRAT1,SULF1,ACKR3,SCG2,ARHGAP25,LILRB4,SH2B3,RGS1,EMILIN1,RGS2,LEP,EDNRA,NLRP3,LGALS3,THBS1,CD14,TIMP2,CD38,TLR4,SERPINE1,CD44,IRAK3,DUSP10,TNFA…
GO: Biological Process	GO:0032418	lysosome localization			3.422e-08	0.0002147	4.749e-07	4.427e-06	13	83	CD300A,HMOX1,ADGRE2,ADORA2B,FCER1G,PIK3CG,FGR,LAT2,MILR1,CD84,BTK,RAC2,LYN
GO: Biological Process	GO:0060348	bone development			3.423e-08	0.0002147	4.749e-07	4.427e-06	22	246	ACP5,TWIST1,TYROBP,FBN1,COL14A1,COL1A1,FLI1,COL6A3,SFRP4,COMP,IGF1,LILRB1,CCN4,PTPRC,SULF1,SH2B3,EPYC,PAPSS2,LEP,THBS1,LOX,GREM1
GO: Biological Process	GO:0050830	defense response to Gram-positive bacterium			3.445e-08	0.0002161	4.77e-07	4.446e-06	15	114	ACP5,FGR,MYO1F,IL6,RIPK2,GBP2,NOD2,C5AR1,NLRP3,RNASE2,RNASE6,CD36,TLR2,LYZ,HCK
GO: Biological Process	GO:0090130	tissue migration			3.46e-08	0.000217	4.78e-07	4.455e-06	28	381	CORO1C,SERPINF1,ACTA2,ACTG2,HMOX1,ADORA2B,FAP,FGF7,MMP9,ANXA1,RGCC,APOE,PPARG,IGF1,LGMN,DCN,ITGB2,PTGS2,ZEB2,NRP2,SRPX2,SCG2,GRN,THBS1,EGR3,SERPINE1,DUSP10,GREM1
GO: Biological Process	GO:0014070	response to organic cyclic compound			3.525e-08	0.0002211	4.849e-07	4.52e-06	53	1068	ABCA1,CEBPB,SERPINF1,ADA,PLIN2,COLEC12,PIK3CG,AHR,HRH1,AIF1,CCL2,CCL5,CCR5,MMP2,PLN,COL1A1,SELL,ANXA1,FOLR2,ICAM1,PPARG,FAS,AQP9,AREG,POSTN,IGF1,IL1RN,IL6,CYBB,IL10,INHBA,RIPK2,NCF2,PTAFR,PTGS2,NOD2,KCNMA1,GNA15,NPC1,GRN,ARPC1B,LEP,LGALS1,EDNRA,THBD,THBS1,LOX,CD36,CD38,TLR2,IRAK3,LUM,LYN
GO: Biological Process	GO:0043549	regulation of kinase activity			3.526e-08	0.0002211	4.849e-07	4.52e-06	50	978	EREG,PDGFRA,CD300A,CORO1C,CHI3L1,ADCY7,FABP4,ADORA2B,S100A12,PIK3CG,CCL5,GPNMB,FGR,MAP3K8,FPR1,RGCC,GMFG,APOE,IGF1,CCN1,PYCARD,IL1RN,IL6,SLAMF8,RASSF2,RIPK2,PTPN22,ZEB2,NOD2,STK4,PTPRC,C5AR1,RAC2,TIGAR,RAP2B,SH2B3,LCP2,RGS2,LEP,EDNRA,THBS1,TLR1,TLR4,CD44,IRAK3,DUSP10,TNFAIP3,GREM1,LYN,NCKAP1L
GO: Biological Process	GO:0072676	lymphocyte migration			3.883e-08	0.0002435	5.329e-07	4.967e-06	15	115	CCR2,PIK3CG,AIF1,CCL2,CCL4,CCL5,CCL7,CCL8,CCL11,CCL18,CCL20,ICAM1,PYCARD,ITGA4,GPR183
GO: Biological Process	GO:0040013	negative regulation of locomotion			3.972e-08	0.0002491	5.44e-07	5.07e-06	30	432	CD300A,CORO1C,SERPINF1,HMOX1,ADA,ADORA3,FBLN1,AIF1,CCL2,COL3A1,RGCC,APOE,PPARG,FAS,ARHGDIB,IL1RN,SLAMF8,DCN,SULF1,NAV3,IL33,DPYSL3,RAP2B,EMILIN1,THBS1,MCTP1,TIMP1,SERPINE1,DUSP10,GREM1
GO: Biological Process	GO:0035987	endodermal cell differentiation			4.162e-08	0.000261	5.687e-07	5.301e-06	10	45	MMP2,MMP9,COL5A1,COL5A2,COL8A1,FN1,INHBA,GATA6,ITGA4,ITGB2
GO: Biological Process	GO:0008015	blood circulation			4.417e-08	0.0002771	6.023e-07	5.614e-06	37	615	CES1,ACTA2,HMOX1,ADA,ADORA2B,ADORA3,KCNE4,CLIC2,PIK3CG,AHR,HRH1,MMP2,PLN,ALOX5,COL1A2,FLI1,COMP,ICAM1,CPA3,APOE,PPARG,POSTN,CTSZ,CXCR2,NCF2,PTAFR,PTGS2,ERAP2,KCNMA1,C3AR1,TBXAS1,OLR1,RGS2,LEP,EDNRA,CD36,CD38
GO: Biological Process	GO:0022617	extracellular matrix disassembly			4.592e-08	0.000288	6.247e-07	5.823e-06	13	85	FAP,MMP1,MMP2,MMP9,MMP12,CTSL,CTSS,IL6,CAPG,LCP1,TIMP1,TIMP2,CD44
GO: Biological Process	GO:0007204	positive regulation of cytosolic calcium ion concentration			4.765e-08	0.0002989	6.47e-07	6.03e-06	27	363	CD52,PDGFRA,CCR2,CLIC2,PIK3CG,CXCL9,CCR1,CCR5,PLN,GPR65,FPR1,FPR3,CXCR2,MYO5A,PTGDR,PTPRC,ACKR3,C3AR1,GNA15,C5AR1,CCRL2,MCOLN1,EDNRA,CORO1A,CD36,CD38,LYN
GO: Biological Process	GO:0045123	cellular extravasation			4.809e-08	0.0003016	6.5e-07	6.059e-06	12	71	CCR2,PIK3CG,CCL2,CCL5,SELL,ICAM1,ITGA4,PTAFR,ITGAM,ITGB2,LEP,TREM1
GO: Biological Process	GO:0033627	cell adhesion mediated by integrin			4.809e-08	0.0003016	6.5e-07	6.059e-06	12	71	ADA,FBN1,PIK3CG,LPXN,CCL5,COL16A1,ICAM1,ITGA4,ITGB2,SERPINE1,LYN,NCKAP1L
GO: Biological Process	GO:1902563	regulation of neutrophil activation			4.849e-08	0.0003041	6.541e-07	6.097e-06	6	11	CD300A,FCGR2B,PTAFR,ITGAM,ITGB2,GRN
GO: Biological Process	GO:1904645	response to amyloid-beta			5.05e-08	0.0003167	6.784e-07	6.324e-06	11	58	FCGR2B,MMP2,MMP9,MMP12,ICAM1,IGF1,LGMN,ITGA4,CD36,TLR4,TREM2
GO: Biological Process	GO:2001057	reactive nitrogen species metabolic process			5.051e-08	0.0003168	6.784e-07	6.324e-06	14	101	ACP5,CLEC7A,HRH1,AIF1,ICAM1,IGF1,IL6,IL10,ITGB2,PTGIS,PTGS2,CD36,TLR2,TLR4
GO: Biological Process	GO:0071402	cellular response to lipoprotein particle stimulus			5.086e-08	0.000319	6.803e-07	6.341e-06	9	35	ABCA1,FCER1G,APOE,PPARG,ABCG1,ITGB2,NPC1,CD36,TLR4
GO: Biological Process	GO:1901652	response to peptide			5.087e-08	0.0003191	6.803e-07	6.341e-06	35	565	EREG,TCIRG1,ADCY7,FBN1,FCGR2B,MMP2,MMP9,MMP12,PLN,COL1A1,ANXA1,ICAM1,PPARG,AREG,IGF1,CYBB,IL10,LGMN,MYO5A,RIPK2,PTPN22,ITGA4,PTGS2,NOD2,PTPRE,RAB31,LEP,TIMP1,EGR2,CD36,TLR2,TLR4,TREM2,TNFAIP3,LYN
GO: Biological Process	GO:1901699	cellular response to nitrogen compound			5.167e-08	0.0003241	6.891e-07	6.423e-06	42	757	CEBPB,PDGFRA,TCIRG1,ADCY7,COLEC12,FBN1,FCGR2B,PIK3CG,AHR,HRH1,AIF1,MMP2,COL1A1,COL1A2,COL3A1,COL5A2,COL16A1,FOLR2,ICAM1,PPARG,AQP9,IGF1,CYBB,LGMN,MYO5A,RIPK2,PTPN22,ITGA4,PTAFR,PTGS2,NOD2,PTPRE,GNA15,RAB31,LEP,NLRP3,THBS1,CD36,TLR2,TLR4,TREM2,LYN
GO: Biological Process	GO:0071417	cellular response to organonitrogen compound			5.175e-08	0.0003246	6.891e-07	6.423e-06	40	701	CEBPB,PDGFRA,TCIRG1,ADCY7,FBN1,FCGR2B,PIK3CG,AHR,HRH1,AIF1,MMP2,COL1A1,COL1A2,COL3A1,COL5A2,COL16A1,FOLR2,ICAM1,PPARG,AQP9,IGF1,CYBB,LGMN,MYO5A,RIPK2,PTPN22,ITGA4,PTAFR,PTGS2,NOD2,PTPRE,GNA15,RAB31,LEP,NLRP3,CD36,TLR2,TLR4,TREM2,LYN
GO: Biological Process	GO:0002407	dendritic cell chemotaxis			6.066e-08	0.0003805	8.061e-07	7.514e-06	8	26	CCR2,PIK3CG,CCR1,CCL5,CCR5,CXCR2,SLAMF8,GPR183
GO: Biological Process	GO:0030199	collagen fibril organization			6.085e-08	0.0003816	8.068e-07	7.52e-06	11	59	COL14A1,COL1A1,COL1A2,COL3A1,COL5A1,COL5A2,COMP,EMILIN1,LOX,GREM1,LUM
GO: Biological Process	GO:0050710	negative regulation of cytokine secretion			6.109e-08	0.0003831	8.083e-07	7.535e-06	13	87	FBLN1,FCGR2B,FN1,ANXA1,RGCC,SRGN,IL6,IL10,PTPN22,LILRB1,CD84,NLRP3,TNFAIP3
GO: Biological Process	GO:0003013	circulatory system process			6.397e-08	0.0004012	8.447e-07	7.874e-06	37	624	CES1,ACTA2,HMOX1,ADA,ADORA2B,ADORA3,KCNE4,CLIC2,PIK3CG,AHR,HRH1,MMP2,PLN,ALOX5,COL1A2,FLI1,COMP,ICAM1,CPA3,APOE,PPARG,POSTN,CTSZ,CXCR2,NCF2,PTAFR,PTGS2,ERAP2,KCNMA1,C3AR1,TBXAS1,OLR1,RGS2,LEP,EDNRA,CD36,CD38
GO: Biological Process	GO:0043086	negative regulation of catalytic activity			6.427e-08	0.0004031	8.469e-07	7.894e-06	49	967	CD300A,CORO1C,SERPINF1,ADCY7,FABP4,CCR2,AHR,PLAUR,PLEK,MMP9,PLN,COL6A3,ANXA1,BAG2,GMFG,APOC1,APOE,PPARG,CR1,IGF1,PYCARD,LAMP3,CSTA,CSTB,MARCO,IL6,PHACTR1,NAIP,PTPN22,PTGS2,PTPRC,C3,TIGAR,RARRES1,SH2B3,RGS1,RGS2,EDNRA,LGALS3,THBS1,TIMP1,TIMP2,SERPINE1,CD44,IRAK3,DUSP10,TNFAIP3,LYN,NCKAP1L
GO: Biological Process	GO:0060099	regulation of phagocytosis, engulfment			6.504e-08	0.0004079	8.552e-07	7.971e-06	7	18	CD300A,PPARG,C3,RAB31,CD36,TREM2,NCKAP1L
GO: Biological Process	GO:0034612	response to tumor necrosis factor			6.603e-08	0.0004141	8.664e-07	8.076e-06	25	322	CHI3L1,FABP4,CCL2,CCL4,CCL5,CCL7,CCL8,CCL11,CCL18,CCL20,AIM2,COL1A1,ICAM1,FAS,POSTN,PYCARD,IL6,CXCL8,GBP2,PTGS2,CASP1,THBS1,CD14,TNFAIP3,TNFRSF1B
GO: Biological Process	GO:0032623	interleukin-2 production			6.635e-08	0.0004161	8.688e-07	8.098e-06	12	73	VSIG4,CLEC7A,CCR2,FCER1G,ANXA1,RIPK2,NOD2,PTPRC,NAV3,CD28,CD86,TNFAIP3
GO: Biological Process	GO:0097242	amyloid-beta clearance			6.649e-08	0.000417	8.688e-07	8.098e-06	9	36	APOE,MSR1,MARCO,ITGAM,ITGB2,C3,C5AR1,CD36,TREM2
GO: Biological Process	GO:0010648	negative regulation of cell communication			6.732e-08	0.0004222	8.778e-07	8.182e-06	70	1632	EREG,LILRB2,CD300A,HMOX1,LY96,ADA,ADCY7,TWIST1,FBLN1,FBN1,FCGR2B,CLIC2,UCP2,LPXN,CCL5,PLAUR,PLEK,MMP9,MMP12,SFRP4,ICAM1,SAMHD1,APOE,PPARG,FAS,AREG,IGF1,PYCARD,IL1RN,MARCO,IL6,CXCL8,IL10,LGMN,INHBA,RASSF2,ASPN,PTPN22,BCL2A1,DCN,PTGS2,NOD2,STK4,PTPRC,PTPRE,SULF1,ACKR3,SCG2,ARHGAP25,LILRB4,SH2B3,RGS1,EMILIN1,RGS2,LEP,EDNRA,NLRP3,LGALS3,THBS1,CD14,TIMP2,CD38,TLR4,SERPINE1,CD44,IRAK3,DUSP10,TNFAIP3,GR…
GO: Biological Process	GO:0050852	T cell receptor signaling pathway			6.98e-08	0.0004378	9.083e-07	8.466e-06	20	214	HLA-DPA1,HLA-DPB1,HLA-DQB1,CD300A,HLA-DRA,HLA-DRB4,ADA,THEMIS2,FYB1,RIPK2,PTPN22,ITK,PTPRC,TRAT1,BTK,LILRB4,LCP2,LGALS3,CD28,TRBC1
GO: Biological Process	GO:1903036	positive regulation of response to wounding			7.025e-08	0.0004406	9.103e-07	8.485e-06	13	88	CLEC7A,S100A9,CCL2,PLEK,ANXA1,HPSE,CCN4,GRN,THBD,THBS1,CD36,TLR4,SERPINE1
GO: Biological Process	GO:1901214	regulation of neuron death			7.025e-08	0.0004406	9.103e-07	8.485e-06	28	394	CEBPB,SERPINF1,HMOX1,TYROBP,FCGR2B,CCL2,CCL5,GPNMB,APOE,FAS,IGF1,IL6,CTSZ,IL10,LGMN,NAIP,NCF2,ITGAM,ITGB2,KCNMA1,C1QA,C5AR1,TIGAR,GRN,NUPR1,CORO1A,TLR4,TNFRSF1B
GO: Biological Process	GO:0002920	regulation of humoral immune response			7.417e-08	0.0004652	9.592e-07	8.94e-06	16	138	CFH,HLA-DMA,VSIG4,FCGR2B,CR1,IGKC,IGLC1,NOD2,PTPRC,C1QA,C1QB,C1R,C1S,C3,C3AR1,C5AR1
GO: Biological Process	GO:0019915	lipid storage			7.762e-08	0.0004868	1.002e-06	9.337e-06	12	74	ABCA1,PLIN2,APOE,PPARG,MSR1,ABCG1,IL6,SOAT1,GM2A,C3,LEP,CD36
GO: Biological Process	GO:0043277	apoptotic cell clearance			8.041e-08	0.0005043	1.036e-06	9.652e-06	10	48	CCR2,TYROBP,FCN1,CCL2,MERTK,MARCO,C3,THBS1,CD36,TREM2
GO: Biological Process	GO:0090023	positive regulation of neutrophil chemotaxis			8.454e-08	0.0005302	1.087e-06	1.013e-05	8	27	SELL,CXCL8,CXCR2,C3AR1,C5AR1,RAC2,EDNRA,NCKAP1L
GO: Biological Process	GO:0002675	positive regulation of acute inflammatory response			8.615e-08	0.0005403	1.105e-06	1.03e-05	9	37	FCER1G,PIK3CG,CCL5,ALOX5AP,IL6,PTGS2,BTK,C3,OSMR
GO: Biological Process	GO:2000107	negative regulation of leukocyte apoptotic process			8.734e-08	0.0005478	1.118e-06	1.042e-05	11	61	ADA,FCER1G,CCL5,CCR5,MERTK,IL7R,CXCR2,LILRB1,NOD2,CD44,HCLS1
GO: Biological Process	GO:0051924	regulation of calcium ion transport			8.875e-08	0.0005566	1.134e-06	1.057e-05	24	304	LILRB2,CLIC2,PIK3CG,CXCL9,AHR,CCL2,CCR1,CCL4,CCL5,PLN,ICAM1,IGF1,MYO5A,PTPN22,LILRB1,GEM,PTGS2,CD84,EDNRA,LGALS3,CORO1A,CD33,SERPINE1,LYN
GO: Biological Process	GO:0032490	detection of molecule of bacterial origin			9.517e-08	0.0005969	1.213e-06	1.131e-05	6	12	LY96,NOD2,TLR1,TLR2,TLR4,TREM2
GO: Biological Process	GO:1905153	regulation of membrane invagination			1.01e-07	0.0006335	1.282e-06	1.195e-05	7	19	CD300A,PPARG,C3,RAB31,CD36,TREM2,NCKAP1L
GO: Biological Process	GO:0030889	negative regulation of B cell proliferation			1.01e-07	0.0006335	1.282e-06	1.195e-05	7	19	CD300A,TYROBP,FCGR2B,MNDA,IL10,BTK,LYN
GO: Biological Process	GO:1904035	regulation of epithelial cell apoptotic process			1.061e-07	0.0006655	1.344e-06	1.253e-05	14	107	HMOX1,CCL2,SFRP4,ICAM1,RGCC,IGF1,IL6,IL10,ITGA4,SCG2,NUPR1,THBS1,SERPINE1,TNFAIP3
GO: Biological Process	GO:0042136	neurotransmitter biosynthetic process			1.077e-07	0.0006756	1.362e-06	1.27e-05	15	124	ACP5,CLEC7A,HRH1,AIF1,ICAM1,SLC1A3,IGF1,IL6,IL10,ITGB2,PTGIS,PTGS2,CD36,TLR2,TLR4
GO: Biological Process	GO:0043304	regulation of mast cell degranulation			1.107e-07	0.0006942	1.397e-06	1.302e-05	9	38	CD300A,HMOX1,ADGRE2,ADORA2B,FCER1G,FGR,CD84,RAC2,LYN
GO: Biological Process	GO:0030194	positive regulation of blood coagulation			1.161e-07	0.000728	1.459e-06	1.36e-05	8	28	S100A9,PLEK,HPSE,THBD,THBS1,CD36,TLR4,SERPINE1
GO: Biological Process	GO:1900048	positive regulation of hemostasis			1.161e-07	0.000728	1.459e-06	1.36e-05	8	28	S100A9,PLEK,HPSE,THBD,THBS1,CD36,TLR4,SERPINE1
GO: Biological Process	GO:0032663	regulation of interleukin-2 production			1.236e-07	0.0007753	1.551e-06	1.445e-05	11	63	VSIG4,CLEC7A,CCR2,ANXA1,RIPK2,NOD2,PTPRC,NAV3,CD28,CD86,TNFAIP3
GO: Biological Process	GO:0097190	apoptotic signaling pathway			1.275e-07	0.0007995	1.596e-06	1.487e-05	38	669	CEBPB,HMOX1,LY96,S100A8,S100A9,TYROBP,PLAUR,SRPX,MMP9,ICAM1,FAS,IGF1,SRGN,PYCARD,INHBA,BCL2A1,ITGAM,PTGIS,PTGS2,STK4,PTPRC,ACKR3,SCG2,BTK,IL33,CASP1,NUPR1,LGALS3,THBS1,CD14,CD28,CD38,GZMB,TLR4,SERPINE1,CD44,TNFAIP3,TNFRSF1B
GO: Biological Process	GO:2000116	regulation of cysteine-type endopeptidase activity			1.282e-07	0.000804	1.602e-06	1.493e-05	22	265	CLEC7A,S100A8,S100A9,PLAUR,MMP9,AIM2,PPARG,FAS,IGF1,CCN1,PYCARD,LAMP3,CTSD,IL6,LGMN,NAIP,RIPK2,PTGS2,CASP1,NLRP3,THBS1,CD44
GO: Biological Process	GO:0033006	regulation of mast cell activation involved in immune response			1.411e-07	0.0008849	1.759e-06	1.64e-05	9	39	CD300A,HMOX1,ADGRE2,ADORA2B,FCER1G,FGR,CD84,RAC2,LYN
GO: Biological Process	GO:0045859	regulation of protein kinase activity			1.441e-07	0.0009036	1.793e-06	1.671e-05	46	903	EREG,CD300A,CORO1C,CHI3L1,ADCY7,FABP4,ADORA2B,S100A12,PIK3CG,CCL5,GPNMB,FGR,MAP3K8,FPR1,RGCC,GMFG,APOE,IGF1,CCN1,PYCARD,IL1RN,IL6,RASSF2,RIPK2,PTPN22,ZEB2,NOD2,STK4,PTPRC,C5AR1,RAC2,RAP2B,SH2B3,LCP2,RGS2,LEP,EDNRA,THBS1,TLR1,TLR4,IRAK3,DUSP10,TNFAIP3,GREM1,LYN,NCKAP1L
GO: Biological Process	GO:0035296	regulation of tube diameter			1.462e-07	0.0009172	1.813e-06	1.69e-05	18	183	ACTA2,HMOX1,ADORA2B,AHR,HRH1,MMP2,ALOX5,COMP,ICAM1,APOE,PTAFR,PTGS2,KCNMA1,TBXAS1,RGS2,LEP,EDNRA,CD38
GO: Biological Process	GO:0097746	regulation of blood vessel diameter			1.462e-07	0.0009172	1.813e-06	1.69e-05	18	183	ACTA2,HMOX1,ADORA2B,AHR,HRH1,MMP2,ALOX5,COMP,ICAM1,APOE,PTAFR,PTGS2,KCNMA1,TBXAS1,RGS2,LEP,EDNRA,CD38
GO: Biological Process	GO:0032757	positive regulation of interleukin-8 production			1.48e-07	0.0009283	1.831e-06	1.707e-05	10	51	CLEC7A,TLR7,FCN1,PYCARD,NOD2,CD14,TLR1,TLR2,TLR4,SERPINE1
GO: Biological Process	GO:0032695	negative regulation of interleukin-12 production			1.524e-07	0.0009561	1.882e-06	1.754e-05	7	20	ACP5,IL10,LILRB1,NOD2,THBS1,TLR2,IRAK3
GO: Biological Process	GO:0010575	positive regulation of vascular endothelial growth factor production			1.572e-07	0.000986	1.937e-06	1.806e-05	8	29	ADORA2B,IL6,HPSE,PTGS2,SULF1,C3,C3AR1,C5AR1
GO: Biological Process	GO:0035150	regulation of tube size			1.588e-07	0.0009962	1.953e-06	1.821e-05	18	184	ACTA2,HMOX1,ADORA2B,AHR,HRH1,MMP2,ALOX5,COMP,ICAM1,APOE,PTAFR,PTGS2,KCNMA1,TBXAS1,RGS2,LEP,EDNRA,CD38
GO: Biological Process	GO:0051338	regulation of transferase activity			1.627e-07	0.00102	1.997e-06	1.861e-05	52	1089	EREG,PDGFRA,CD300A,CORO1C,CHI3L1,ADCY7,FABP4,ADORA2B,S100A12,PIK3CG,CCL5,GPNMB,FGR,MAP3K8,FPR1,RGCC,BAG2,GMFG,APOE,PPARG,IGF1,CCN1,PYCARD,IL1RN,IL6,SLAMF8,RASSF2,RIPK2,PTPN22,ZEB2,NOD2,STK4,PTPRC,C5AR1,RAC2,TIGAR,RAP2B,SH2B3,LCP2,RGS2,LEP,EDNRA,THBS1,TLR1,TLR4,CD44,IRAK3,DUSP10,TNFAIP3,GREM1,LYN,NCKAP1L
GO: Biological Process	GO:0010517	regulation of phospholipase activity			1.661e-07	0.001042	2.035e-06	1.897e-05	17	165	PDGFRA,HRH1,CCL5,PLEK,GPR65,ANXA1,FPR1,FPR3,CCN1,CXCR2,PTAFR,ITK,C3AR1,GNA15,C5AR1,RGS2,EDNRA
GO: Biological Process	GO:0042092	type 2 immune response			1.785e-07	0.00112	2.178e-06	2.03e-05	9	40	CCR2,ANXA1,RSAD2,IL6,IL10,NOD2,IL33,NLRP3,CD86
GO: Biological Process	GO:0034142	toll-like receptor 4 signaling pathway			1.785e-07	0.00112	2.178e-06	2.03e-05	9	40	LY96,RIPK2,PTPN22,ITGAM,ITGB2,CD14,TLR4,TNFAIP3,LYN
GO: Biological Process	GO:0050853	B cell receptor signaling pathway			1.825e-07	0.001145	2.223e-06	2.072e-05	15	129	CD300A,FCGR2B,LPXN,MNDA,LAT2,IGKC,IGLC1,PTPN22,ITK,PTPRC,BTK,CD38,TRBC1,LYN,NCKAP1L
GO: Biological Process	GO:0072376	protein activation cascade			1.971e-07	0.001236	2.396e-06	2.233e-05	19	207	CFH,VSIG4,FBLN1,FCN1,VWF,RGCC,CR1,IGKC,IGLC1,IL10,CFD,C1QA,C1QB,C1R,C1S,C3,C3AR1,C5AR1,TRBC1
GO: Biological Process	GO:0009968	negative regulation of signal transduction			2.016e-07	0.001265	2.446e-06	2.28e-05	65	1513	EREG,CD300A,HMOX1,LY96,ADA,ADCY7,TWIST1,FBLN1,FBN1,FCGR2B,CLIC2,LPXN,CCL5,PLAUR,PLEK,MMP9,MMP12,SFRP4,ICAM1,SAMHD1,APOE,PPARG,FAS,AREG,IGF1,PYCARD,IL1RN,MARCO,IL6,CXCL8,IL10,LGMN,RASSF2,ASPN,PTPN22,BCL2A1,DCN,PTGS2,NOD2,STK4,PTPRC,PTPRE,SULF1,ACKR3,SCG2,ARHGAP25,LILRB4,SH2B3,RGS1,EMILIN1,RGS2,EDNRA,NLRP3,LGALS3,THBS1,CD14,TIMP2,TLR4,SERPINE1,CD44,IRAK3,DUSP10,TNFAIP3,GREM1,LYN
GO: Biological Process	GO:0051130	positive regulation of cellular component organization			2.022e-07	0.001268	2.448e-06	2.282e-05	60	1350	ABCA1,EREG,CORO1C,SERPINF1,CLEC7A,S100A9,TYROBP,CXCL9,AHR,PLAUR,CCL11,MMP1,PLEK,MMP9,AIM2,SFRP4,COL16A1,GPR65,FN1,ANXA1,ICAM1,RGCC,GMFG,APOE,PPARG,FAS,IGF1,PYCARD,JCHAIN,IL6,DCN,ZEB2,SRPX2,NAV3,C3,RAC2,DPYSL3,RAB31,CAPG,GRN,LCP1,EMILIN1,RGS2,ARPC1B,CORO1A,THBS2,CD14,PLXNC1,CD28,CD36,GZMB,TLR4,SERPINE1,TREM2,CD53,GREM1,LYN,HCK,HCLS1,NCKAP1L
GO: Biological Process	GO:0048247	lymphocyte chemotaxis			2.031e-07	0.001274	2.45e-06	2.283e-05	11	66	CCR2,PIK3CG,CCL2,CCL4,CCL5,CCL7,CCL8,CCL11,CCL18,CCL20,GPR183
GO: Biological Process	GO:0045824	negative regulation of innate immune response			2.031e-07	0.001274	2.45e-06	2.283e-05	11	66	VSIG4,MMP12,SAMHD1,PPARG,CR1,SLAMF8,LILRB1,GRN,IRAK3,DUSP10,TNFAIP3
GO: Biological Process	GO:0036336	dendritic cell migration			2.102e-07	0.001319	2.526e-06	2.355e-05	8	30	CCR2,PIK3CG,CCR1,CCL5,CCR5,CXCR2,SLAMF8,GPR183
GO: Biological Process	GO:0071624	positive regulation of granulocyte chemotaxis			2.102e-07	0.001319	2.526e-06	2.355e-05	8	30	SELL,CXCL8,CXCR2,C3AR1,C5AR1,RAC2,EDNRA,NCKAP1L
GO: Biological Process	GO:0051090	regulation of DNA-binding transcription factor activity			2.111e-07	0.001324	2.531e-06	2.359e-05	41	768	TLR7,HMOX1,LY96,CHI3L1,TWIST1,S100A8,S100A9,S100A12,ADORA3,AIM2,SFRP4,ICAM1,RGCC,PPARG,PYCARD,IL1RN,IL6,IL10,RASSF2,RIPK2,PTPN22,ITGB2,PTGIS,NOD2,CD84,BTK,CASP1,NUPR1,LGALS1,NLRP3,CD14,CD36,TLR1,TLR2,TLR4,TREM2,IRAK3,TNFAIP3,GREM1,HCK,HCLS1
GO: Biological Process	GO:0002824	positive regulation of adaptive immune response based on somatic recombination of immune receptors built from immunoglobulin superfamily domains			2.12e-07	0.00133	2.533e-06	2.361e-05	14	113	HLA-DMA,ADA,CCR2,FCER1G,ANXA1,RSAD2,IL6,RIPK2,NOD2,PTPRC,BTK,C3,NLRP3,CD28
GO: Biological Process	GO:2000377	regulation of reactive oxygen species metabolic process			2.121e-07	0.00133	2.533e-06	2.361e-05	20	229	ACP5,CLEC7A,TYROBP,HRH1,AIF1,ICAM1,IGF1,IL6,IL10,ITGAM,ITGB2,PTGIS,PTGS2,RAC2,TIGAR,LEP,THBS1,CD36,TLR2,TLR4
GO: Biological Process	GO:0051092	positive regulation of NF-kappaB transcription factor activity			2.18e-07	0.001367	2.6e-06	2.423e-05	31	493	TLR7,HMOX1,LY96,CHI3L1,S100A8,S100A9,S100A12,AIM2,ICAM1,PYCARD,IL1RN,IL6,RASSF2,RIPK2,PTPN22,ITGB2,NOD2,CD84,BTK,CASP1,LGALS1,NLRP3,CD14,CD36,TLR1,TLR2,TLR4,TREM2,IRAK3,TNFAIP3,GREM1
GO: Biological Process	GO:0042493	response to drug			2.224e-07	0.001395	2.647e-06	2.468e-05	55	1194	ABCA1,SERPINF1,HMOX1,ADA,ADCY7,PLIN2,S100A8,AHR,HRH1,AIF1,CCL7,MMP2,MMP9,AIM2,COL1A1,SELL,ANXA1,FOLR2,ICAM1,PPARG,SLC1A3,AREG,IGF1,IL6,CYBB,SLAMF8,IL10,INHBA,RIPK2,GATA6,PTPN22,PTAFR,PTGS2,NOD2,KCNMA1,GNA15,NNMT,NPC1,TDO2,RGS2,LEP,LGALS1,EDNRA,THBS1,CD14,TIMP2,LOX,CD38,TLR2,TLR4,SERPINE1,CD69,TNFAIP3,LYN,NCKAP1L
GO: Biological Process	GO:0098581	detection of external biotic stimulus			2.243e-07	0.001407	2.665e-06	2.484e-05	7	21	CLEC7A,LY96,NOD2,TLR1,TLR2,TLR4,TREM2
GO: Biological Process	GO:0030316	osteoclast differentiation			2.368e-07	0.001486	2.808e-06	2.618e-05	14	114	CEBPB,TCIRG1,TYROBP,FBN1,FCER1G,CCR1,CCL5,RASSF2,LILRB1,CCN4,LILRB4,GPR183,TLR4,TREM2
GO: Biological Process	GO:0150062	complement-mediated synapse pruning			2.446e-07	0.001534	2.895e-06	2.698e-05	4	4	ITGAM,C1QA,C3,TREM2
GO: Biological Process	GO:0002709	regulation of T cell mediated immunity			2.497e-07	0.001566	2.949e-06	2.749e-05	12	82	CCR2,CLC,FCGR2B,CCL20,RSAD2,IL6,IL7R,LILRB1,NOD2,PTPRC,NLRP3,TNFRSF1B
GO: Biological Process	GO:0050679	positive regulation of epithelial cell proliferation			2.618e-07	0.001642	3.086e-06	2.877e-05	20	232	HMOX1,TWIST1,ADORA2B,CCL2,FGF7,CCL5,CCL11,MMP12,AREG,IGF1,IL6,IL10,ITGA4,NRP2,NOD2,SCG2,C5AR1,GRN,EGR3,TNFAIP3
GO: Biological Process	GO:0071356	cellular response to tumor necrosis factor			2.626e-07	0.001647	3.09e-06	2.881e-05	23	299	CHI3L1,FABP4,CCL2,CCL4,CCL5,CCL7,CCL8,CCL11,CCL18,CCL20,AIM2,COL1A1,ICAM1,FAS,POSTN,PYCARD,IL6,CXCL8,GBP2,CASP1,THBS1,TNFAIP3,TNFRSF1B
GO: Biological Process	GO:0048659	smooth muscle cell proliferation			2.658e-07	0.001667	3.122e-06	2.91e-05	19	211	EREG,HMOX1,AIF1,CCL5,MMP2,MMP9,CNN1,PPARG,IGF1,IL6,IL10,PTAFR,PTGS2,CCN4,C3AR1,OGN,EDNRA,THBS1,TNFAIP3
GO: Biological Process	GO:0050820	positive regulation of coagulation			2.779e-07	0.001743	3.258e-06	3.037e-05	8	31	S100A9,PLEK,HPSE,THBD,THBS1,CD36,TLR4,SERPINE1
GO: Biological Process	GO:0010631	epithelial cell migration			2.867e-07	0.001798	3.355e-06	3.127e-05	26	372	CORO1C,SERPINF1,HMOX1,ADORA2B,FAP,FGF7,MMP9,ANXA1,RGCC,APOE,PPARG,IGF1,LGMN,DCN,ITGB2,PTGS2,ZEB2,NRP2,SRPX2,SCG2,GRN,THBS1,EGR3,SERPINE1,DUSP10,GREM1
GO: Biological Process	GO:0019886	antigen processing and presentation of exogenous peptide antigen via MHC class II			2.901e-07	0.00182	3.389e-06	3.159e-05	13	99	HLA-DMA,HLA-DPA1,HLA-DPB1,HLA-DQB1,HLA-DRA,HLA-DRB4,FCER1G,FCGR2B,CTSD,CTSL,CTSS,LGMN,SEC24D
GO: Biological Process	GO:0051091	positive regulation of DNA-binding transcription factor activity			2.979e-07	0.001868	3.472e-06	3.237e-05	35	608	TLR7,HMOX1,LY96,CHI3L1,S100A8,S100A9,S100A12,AIM2,ICAM1,RGCC,PPARG,PYCARD,IL1RN,IL6,IL10,RASSF2,RIPK2,PTPN22,ITGB2,NOD2,CD84,BTK,CASP1,LGALS1,NLRP3,CD14,CD36,TLR1,TLR2,TLR4,TREM2,IRAK3,TNFAIP3,GREM1,HCLS1
GO: Biological Process	GO:0019724	B cell mediated immunity			3.006e-07	0.001885	3.498e-06	3.26e-05	20	234	HLA-DMA,HLA-DQB1,TCIRG1,FCER1G,FCGR2B,CR1,FAS,IGKC,IGLC1,IL10,NOD2,PTPRC,BTK,C1QA,C1QB,C1R,C1S,C3,CD28,TRBC1
GO: Biological Process	GO:0045429	positive regulation of nitric oxide biosynthetic process			3.13e-07	0.001963	3.635e-06	3.389e-05	10	55	CLEC7A,HRH1,AIF1,ICAM1,IL6,ITGB2,PTGS2,CD36,TLR2,TLR4
GO: Biological Process	GO:0001780	neutrophil homeostasis			3.227e-07	0.002024	3.728e-06	3.475e-05	7	22	CCR2,MERTK,ANXA1,IL6,CXCR2,SH2B3,CD44
GO: Biological Process	GO:0002374	cytokine secretion involved in immune response			3.227e-07	0.002024	3.728e-06	3.475e-05	7	22	IL10,LILRB1,NOD2,NLRP3,TLR2,TREM1,TNFRSF1B
GO: Biological Process	GO:0002577	regulation of antigen processing and presentation			3.227e-07	0.002024	3.728e-06	3.475e-05	7	22	LILRB2,FCGR2B,PYCARD,PTPN22,NOD2,THBS1,TREM2
GO: Biological Process	GO:0010035	response to inorganic substance			3.248e-07	0.002037	3.745e-06	3.491e-05	36	638	CYBRD1,SERPINF1,TCIRG1,HMOX1,ADA,ADCY7,FABP4,S100A8,UCP2,MMP2,MMP9,PLN,ALOX5AP,COL1A1,FN1,ANXA1,ICAM1,PPARG,FAS,SLC1A3,AQP9,AREG,IL6,CYBB,IL10,LGMN,PTGS2,KCNMA1,C1QA,NPC1,TIGAR,MCOLN1,THBS1,CD14,CD36,TNFAIP3
GO: Biological Process	GO:0060191	regulation of lipase activity			3.257e-07	0.002043	3.748e-06	3.494e-05	18	193	PDGFRA,HRH1,CCL5,PLEK,GPR65,ANXA1,FPR1,FPR3,APOC1,CCN1,CXCR2,PTAFR,ITK,C3AR1,GNA15,C5AR1,RGS2,EDNRA
GO: Biological Process	GO:0050709	negative regulation of protein secretion			3.29e-07	0.002064	3.78e-06	3.523e-05	17	173	FBLN1,FCGR2B,UCP2,FN1,ANXA1,RGCC,APOE,RSAD2,SRGN,IL6,IL10,PTPN22,LILRB1,CD84,IL33,NLRP3,TNFAIP3
GO: Biological Process	GO:0010952	positive regulation of peptidase activity			3.309e-07	0.002076	3.795e-06	3.537e-05	19	214	CLEC7A,S100A8,S100A9,FBLN1,AIM2,FN1,PPARG,CR1,FAS,CCN1,PYCARD,CTSD,LGMN,RIPK2,CASP1,GRN,NLRP3,LYN,PCOLCE
GO: Biological Process	GO:0090132	epithelium migration			3.347e-07	0.002099	3.831e-06	3.571e-05	26	375	CORO1C,SERPINF1,HMOX1,ADORA2B,FAP,FGF7,MMP9,ANXA1,RGCC,APOE,PPARG,IGF1,LGMN,DCN,ITGB2,PTGS2,ZEB2,NRP2,SRPX2,SCG2,GRN,THBS1,EGR3,SERPINE1,DUSP10,GREM1
GO: Biological Process	GO:0042063	gliogenesis			3.607e-07	0.002262	4.12e-06	3.841e-05	25	352	CCR2,S100A8,S100A9,CCL2,FN1,ANXA1,PPARG,FAS,AREG,IGF1,VCAN,IL6,ITGAM,C1QA,C5AR1,IL33,GRN,GPR183,EGR2,TLR2,TLR4,TREM2,DUSP10,TNFRSF1B,LYN
GO: Biological Process	GO:0002286	T cell activation involved in immune response			3.647e-07	0.002287	4.158e-06	3.876e-05	14	118	CCR2,FCER1G,FCGR2B,CCL20,ANXA1,ICAM1,IL6,RIPK2,LILRB1,GPR183,LCP1,NLRP3,LGALS3,CD86
GO: Biological Process	GO:0009636	response to toxic substance			3.692e-07	0.002316	4.203e-06	3.917e-05	34	586	CES1,HMOX1,ADA,ADCY7,S100A8,S100A9,CLIC2,AHR,CCL4,CCL5,CCL7,MMP2,ALOX5AP,COL1A1,ANXA1,ICAM1,APOE,FAS,AREG,IGF1,IL6,CYBB,IL10,PTGS2,KCNMA1,NUPR1,RGS2,LEP,CD14,CD36,TLR2,TLR4,TNFAIP3,LYN
GO: Biological Process	GO:1904407	positive regulation of nitric oxide metabolic process			3.736e-07	0.002343	4.244e-06	3.956e-05	10	56	CLEC7A,HRH1,AIF1,ICAM1,IL6,ITGB2,PTGS2,CD36,TLR2,TLR4
GO: Biological Process	GO:0043271	negative regulation of ion transport			4.097e-07	0.00257	4.646e-06	4.331e-05	18	196	LILRB2,CD300A,TWIST1,KCNE4,CLIC2,AHR,MMP9,PLN,SFRP4,ICAM1,IL1RN,LILRB1,GEM,PTGS2,RGS2,LEP,THBS1,CD33
GO: Biological Process	GO:0003018	vascular process in circulatory system			4.104e-07	0.002574	4.646e-06	4.331e-05	19	217	ACTA2,HMOX1,ADORA2B,AHR,HRH1,MMP2,ALOX5,COMP,ICAM1,APOE,CXCR2,PTAFR,PTGS2,KCNMA1,TBXAS1,RGS2,LEP,EDNRA,CD38
GO: Biological Process	GO:0043281	regulation of cysteine-type endopeptidase activity involved in apoptotic process			4.219e-07	0.002646	4.768e-06	4.444e-05	20	239	CLEC7A,S100A8,S100A9,PLAUR,MMP9,PPARG,FAS,IGF1,CCN1,PYCARD,LAMP3,CTSD,IL6,NAIP,RIPK2,PTGS2,CASP1,NLRP3,THBS1,CD44
GO: Biological Process	GO:1901136	carbohydrate derivative catabolic process			4.419e-07	0.002771	4.985e-06	4.646e-05	18	197	NPL,CHIT1,ADA,UPP1,MMP12,NAGK,AOAH,SAMHD1,VCAN,SDC3,FUCA1,DCN,HPSE,ADA2,GM2A,OGN,CD44,LUM
GO: Biological Process	GO:0002828	regulation of type 2 immune response			4.704e-07	0.00295	5.287e-06	4.929e-05	8	33	CCR2,ANXA1,RSAD2,IL6,NOD2,IL33,NLRP3,CD86
GO: Biological Process	GO:0055094	response to lipoprotein particle			4.704e-07	0.00295	5.287e-06	4.929e-05	8	33	ABCA1,FCER1G,APOE,PPARG,ITGB2,NPC1,CD36,TLR4
GO: Biological Process	GO:0050731	positive regulation of peptidyl-tyrosine phosphorylation			4.727e-07	0.002965	5.304e-06	4.944e-05	19	219	EREG,PDGFRA,FGF7,CCL5,ICAM1,AREG,IGF1,IL6,RIPK2,NOD2,PTPRC,LEP,CD36,TLR4,CD44,TREM2,GREM1,LYN,HCLS1
GO: Biological Process	GO:0043491	protein kinase B signaling			4.785e-07	0.003001	5.359e-06	4.995e-05	22	286	EREG,PDGFRA,CHI3L1,PIK3CG,CCL2,FGF7,CCL5,MERTK,VAV1,AREG,IGF1,IL6,HPSE,TRAT1,RAC2,SH2B3,LEP,THBS1,CD28,CD86,LOX,HCLS1
GO: Biological Process	GO:2001198	regulation of dendritic cell differentiation			4.871e-07	0.003055	5.446e-06	5.076e-05	6	15	CEBPB,LILRB2,FCGR2B,LILRB1,LGALS1,LGALS3
GO: Biological Process	GO:0070997	neuron death			5.102e-07	0.0032	5.694e-06	5.308e-05	28	434	CEBPB,SERPINF1,HMOX1,TYROBP,FCGR2B,CCL2,CCL5,GPNMB,APOE,FAS,IGF1,IL6,CTSZ,IL10,LGMN,NAIP,NCF2,ITGAM,ITGB2,KCNMA1,C1QA,C5AR1,TIGAR,GRN,NUPR1,CORO1A,TLR4,TNFRSF1B
GO: Biological Process	GO:0033674	positive regulation of kinase activity			5.256e-07	0.003297	5.855e-06	5.458e-05	36	651	EREG,PDGFRA,CD300A,CHI3L1,ADCY7,ADORA2B,S100A12,PIK3CG,CCL5,GPNMB,FGR,MAP3K8,FPR1,RGCC,IGF1,CCN1,IL1RN,RASSF2,RIPK2,ZEB2,NOD2,STK4,PTPRC,C5AR1,TIGAR,RAP2B,LCP2,LEP,EDNRA,THBS1,TLR1,TLR4,CD44,GREM1,LYN,NCKAP1L
GO: Biological Process	GO:0031589	cell-substrate adhesion			5.271e-07	0.003306	5.862e-06	5.464e-05	26	384	CORO1C,ACTN1,FBLN1,MERTK,MMP12,COL1A1,COL3A1,COL8A1,VWF,COL16A1,FN1,MMRN1,POSTN,CCN1,ITGA4,HPSE,ITGB2,RAC2,EMILIN1,LGALS1,CORO1A,THBS1,CD36,SERPINE1,CD44,GREM1
GO: Biological Process	GO:0001910	regulation of leukocyte mediated cytotoxicity			5.489e-07	0.003442	6.093e-06	5.679e-05	12	88	TYROBP,FCGR2B,MICB,CCL2,VAV1,ICAM1,IL7R,ITGAM,LILRB1,PTPRC,LEP,CRTAM
GO: Biological Process	GO:2000379	positive regulation of reactive oxygen species metabolic process			5.514e-07	0.003458	6.11e-06	5.695e-05	14	122	CLEC7A,TYROBP,HRH1,AIF1,ICAM1,IL6,ITGAM,ITGB2,PTGS2,LEP,THBS1,CD36,TLR2,TLR4
GO: Biological Process	GO:0046635	positive regulation of alpha-beta T cell activation			5.853e-07	0.003671	6.474e-06	6.035e-05	11	73	ADA,CCR2,ANXA1,IL6,RIPK2,PTPN22,PTPRC,NLRP3,CD28,CD86,NCKAP1L
GO: Biological Process	GO:0033032	regulation of myeloid cell apoptotic process			6.033e-07	0.003784	6.662e-06	6.21e-05	8	34	CLEC5A,FCER1G,CCL5,CCR5,ANXA1,CXCR2,NOD2,CD44
GO: Biological Process	GO:0048608	reproductive structure development			6.1e-07	0.003826	6.724e-06	6.268e-05	31	517	EREG,CEBPB,PDGFRA,SERPINF1,ADA,BASP1,AHR,FGF7,PLAUR,MMP2,MERTK,VWF,ANXA1,ICAM1,PPARG,IGF1,CCN1,IL10,INHBA,GATA6,ITGA4,DCN,PTGIS,PTGS2,STK4,SULF1,NUPR1,LEP,ZFPM2,SERPINE1,CD44
GO: Biological Process	GO:0048729	tissue morphogenesis			6.22e-07	0.003901	6.833e-06	6.369e-05	43	860	PDGFRA,ACTA2,ACTG2,TWIST1,MGP,AHR,FGF7,COL14A1,CCL11,MMP2,ALDH1A3,MMP9,MMP12,COL3A1,COL5A1,COL5A2,COL6A3,COL8A1,FN1,AREG,IGF1,CCN1,CTSD,IL1RN,IL6,CTSZ,CXCR2,IL10,INHBA,GATA6,ITGA4,ITGAX,ITGB2,ZEB2,NRP2,STK4,SULF1,LCP1,EDNRA,ZFPM2,CD44,TNFAIP3,GREM1
GO: Biological Process	GO:0061448	connective tissue development			6.22e-07	0.003901	6.833e-06	6.369e-05	23	314	ACTA2,CHI3L1,MGP,COL14A1,COL1A1,COL5A1,COL6A3,PRRX1,COMP,IGF1,CCN1,CCN4,SULF1,C3AR1,EPYC,LEP,TGFBI,THBS1,TIMP1,LOX,CD44,GREM1,LUM
GO: Biological Process	GO:0051480	regulation of cytosolic calcium ion concentration			6.324e-07	0.003966	6.934e-06	6.464e-05	27	413	CD52,PDGFRA,CCR2,CLIC2,PIK3CG,CXCL9,CCR1,CCR5,PLN,GPR65,FPR1,FPR3,CXCR2,MYO5A,PTGDR,PTPRC,ACKR3,C3AR1,GNA15,C5AR1,CCRL2,MCOLN1,EDNRA,CORO1A,CD36,CD38,LYN
GO: Biological Process	GO:0042310	vasoconstriction			6.485e-07	0.004067	7.086e-06	6.605e-05	13	106	ACTA2,AHR,HRH1,MMP2,ALOX5,COMP,ICAM1,PTAFR,PTGS2,TBXAS1,LEP,EDNRA,CD38
GO: Biological Process	GO:0002702	positive regulation of production of molecular mediator of immune response			6.485e-07	0.004067	7.086e-06	6.605e-05	13	106	FCER1G,RSAD2,IL6,PTPN22,LILRB1,NOD2,PTPRC,IL33,NLRP3,CD28,CD36,TLR2,TLR4
GO: Biological Process	GO:0006816	calcium ion transport			6.56e-07	0.004115	7.156e-06	6.67e-05	30	492	LILRB2,CLIC2,PIK3CG,CXCL9,AHR,HRH1,CCL2,CCR1,CCL4,CCL5,CCR5,CCL8,PLN,ICAM1,IGF1,MYO5A,PTPN22,LILRB1,GEM,PTGS2,CD84,PTPRC,MCUB,MCOLN1,EDNRA,LGALS3,CORO1A,CD33,SERPINE1,LYN
GO: Biological Process	GO:0061458	reproductive system development			7.19e-07	0.00451	7.829e-06	7.298e-05	31	521	EREG,CEBPB,PDGFRA,SERPINF1,ADA,BASP1,AHR,FGF7,PLAUR,MMP2,MERTK,VWF,ANXA1,ICAM1,PPARG,IGF1,CCN1,IL10,INHBA,GATA6,ITGA4,DCN,PTGIS,PTGS2,STK4,SULF1,NUPR1,LEP,ZFPM2,SERPINE1,CD44
GO: Biological Process	GO:0002704	negative regulation of leukocyte mediated immunity			7.307e-07	0.004583	7.933e-06	7.394e-05	10	60	CD300A,HMOX1,CCR2,FCGR2B,CR1,IL7R,LILRB1,NOD2,CD84,PTPRC
GO: Biological Process	GO:0006956	complement activation			7.311e-07	0.004585	7.933e-06	7.394e-05	17	183	CFH,VSIG4,FCN1,RGCC,CR1,IGKC,IGLC1,IL10,CFD,C1QA,C1QB,C1R,C1S,C3,C3AR1,C5AR1,TRBC1
GO: Biological Process	GO:0022408	negative regulation of cell-cell adhesion			7.393e-07	0.004637	8.008e-06	7.464e-05	18	204	CEBPB,LILRB2,CD300A,VSIG4,FCGR2B,GPNMB,ANXA1,RGCC,IL1RN,IL10,FXYD5,PTPN22,LILRB1,SH2B3,LGALS3,CD86,CD44,TNFAIP3
GO: Biological Process	GO:0045862	positive regulation of proteolysis			7.425e-07	0.004657	8.027e-06	7.482e-05	26	391	CLEC7A,S100A8,S100A9,FBLN1,SPON1,AIM2,FN1,BAG2,APOE,PPARG,CR1,FAS,CCN1,PYCARD,CTSD,LGMN,RIPK2,IL33,CASP1,GRN,NUPR1,NLRP3,TREM2,TNFRSF1B,LYN,PCOLCE
GO: Biological Process	GO:1903426	regulation of reactive oxygen species biosynthetic process			7.435e-07	0.004663	8.027e-06	7.482e-05	14	125	ACP5,CLEC7A,HRH1,AIF1,ICAM1,IGF1,IL6,IL10,ITGB2,PTGIS,PTGS2,CD36,TLR2,TLR4
GO: Biological Process	GO:0060100	positive regulation of phagocytosis, engulfment			7.648e-07	0.004797	8.227e-06	7.669e-05	6	16	PPARG,C3,RAB31,CD36,TREM2,NCKAP1L
GO: Biological Process	GO:1905155	positive regulation of membrane invagination			7.648e-07	0.004797	8.227e-06	7.669e-05	6	16	PPARG,C3,RAB31,CD36,TREM2,NCKAP1L
GO: Biological Process	GO:0035710	CD4-positive, alpha-beta T cell activation			8.061e-07	0.005056	8.658e-06	8.07e-05	13	108	CEBPB,TCIRG1,CCR2,CCL20,ANXA1,RSAD2,IL6,RIPK2,GPR183,NLRP3,CD86,CD44,NCKAP1L
GO: Biological Process	GO:0048661	positive regulation of smooth muscle cell proliferation			8.198e-07	0.005142	8.787e-06	8.19e-05	14	126	EREG,HMOX1,AIF1,CCL5,MMP2,MMP9,IGF1,IL6,IL10,PTAFR,PTGS2,CCN4,C3AR1,THBS1
GO: Biological Process	GO:0031334	positive regulation of protein-containing complex assembly			8.21e-07	0.005149	8.787e-06	8.19e-05	21	272	ABCA1,CLEC7A,AHR,CCL11,MMP1,PLEK,AIM2,ICAM1,GMFG,FAS,PYCARD,JCHAIN,NAV3,CAPG,LCP1,ARPC1B,CORO1A,CD36,TLR4,HCK,NCKAP1L
GO: Biological Process	GO:0048660	regulation of smooth muscle cell proliferation			8.527e-07	0.005348	9.111e-06	8.492e-05	18	206	EREG,HMOX1,AIF1,CCL5,MMP2,MMP9,CNN1,PPARG,IGF1,IL6,IL10,PTAFR,PTGS2,CCN4,C3AR1,OGN,THBS1,TNFAIP3
GO: Biological Process	GO:1905517	macrophage migration			8.569e-07	0.005375	9.14e-06	8.52e-05	10	61	CCR2,CCL2,CCL5,SLAMF8,C3AR1,C5AR1,EMILIN1,LGALS3,THBS1,TREM2
GO: Biological Process	GO:0006811	ion transport			8.947e-07	0.005612	9.528e-06	8.881e-05	76	1956	ABCA1,ATP8B4,CEBPB,SLCO2B1,LILRB2,CD300A,TCIRG1,SLC15A3,ADA,FABP4,PLIN2,TWIST1,CCR2,KCNE4,FCER1G,CLIC2,PIK3CG,UCP2,CXCL9,AHR,HRH1,CCL2,CCR1,CCL4,CCL5,CCR5,CCL8,MMP9,PLN,ALOX5,PLTP,STEAP1,SFRP4,SLC31A2,ANXA1,FOLR2,ICAM1,APOC1,APOE,PPARG,SLC1A3,AQP9,ABCG1,IGF1,PIEZO2,IL1RN,CTSS,CYBB,MYO5A,FXYD5,PTPN22,PTAFR,LILRB1,GEM,PTGS2,CD84,PTPRC,BTK,KCNMA1,MCUB,NUPR1,MCOLN1,RGS2,LEP,EDNRA,LGALS3,CORO1A,THBS1,…
GO: Biological Process	GO:0051897	positive regulation of protein kinase B signaling			9.186e-07	0.005762	9.765e-06	9.102e-05	17	186	EREG,PDGFRA,CHI3L1,PIK3CG,FGF7,VAV1,AREG,IGF1,IL6,HPSE,TRAT1,RAC2,LEP,THBS1,CD28,CD86,HCLS1
GO: Biological Process	GO:0030574	collagen catabolic process			9.355e-07	0.005868	9.928e-06	9.254e-05	9	48	FAP,MMP1,MMP2,MMP9,MMP12,COL15A1,CTSD,CTSL,CTSS
GO: Biological Process	GO:0010543	regulation of platelet activation			9.671e-07	0.006066	1.025e-05	9.551e-05	8	36	PDGFRA,FCER1G,PLEK,APOE,SH2B3,THBD,TLR4,LYN
GO: Biological Process	GO:0019730	antimicrobial humoral response			9.937e-07	0.006232	1.051e-05	9.796e-05	14	128	S100A8,S100A9,S100A12,CXCL9,CCL2,PPBP,JCHAIN,CXCL8,NOD2,CXCL2,CXCL3,RNASE2,RNASE6,LYZ
GO: Biological Process	GO:0016064	immunoglobulin mediated immune response			9.977e-07	0.006257	1.053e-05	9.819e-05	19	230	HLA-DMA,HLA-DQB1,TCIRG1,FCER1G,FCGR2B,CR1,IGKC,IGLC1,IL10,NOD2,PTPRC,BTK,C1QA,C1QB,C1R,C1S,C3,CD28,TRBC1
GO: Biological Process	GO:1903409	reactive oxygen species biosynthetic process			1.002e-06	0.006285	1.056e-05	9.846e-05	15	147	ACP5,CLEC7A,HRH1,AIF1,ICAM1,IGF1,IL6,CYBB,IL10,ITGB2,PTGIS,PTGS2,CD36,TLR2,TLR4
GO: Biological Process	GO:0009725	response to hormone			1.032e-06	0.006471	1.086e-05	0.0001012	49	1062	EREG,SERPINF1,TCIRG1,ME1,ADCY7,FBN1,AIF1,MMP2,PLN,COL1A1,SFRP4,ANXA1,ICAM1,PPARG,FAS,AREG,POSTN,ABCG1,IGF1,IL1RN,CTSL,CTSS,IL6,CYBB,IL10,MYO5A,INHBA,GATA6,NCF2,PTAFR,PTGDR,PTGS2,PTPRE,KCNMA1,GNA15,NPC1,RAB31,GRN,ARPC1B,LEP,THBS1,TIMP1,TIMP2,EGR2,LOX,CD38,TLR2,LYN,HCLS1
GO: Biological Process	GO:0002830	positive regulation of type 2 immune response			1.16e-06	0.007274	1.218e-05	0.0001136	6	17	RSAD2,IL6,NOD2,IL33,NLRP3,CD86
GO: Biological Process	GO:0002282	microglial cell activation involved in immune response			1.175e-06	0.007367	1.232e-05	0.0001148	4	5	TYROBP,IL33,GRN,TREM2
GO: Biological Process	GO:0030183	B cell differentiation			1.191e-06	0.007469	1.247e-05	0.0001162	15	149	TCIRG1,ADA,FCGR2B,AHR,DOCK10,SLAMF8,IL10,INHBA,ITGA4,PTPRC,BTK,GPR183,LGALS1,TNFAIP3,NCKAP1L
GO: Biological Process	GO:0002888	positive regulation of myeloid leukocyte mediated immunity			1.21e-06	0.00759	1.263e-05	0.0001177	8	37	ADORA2B,FCER1G,FGR,PTAFR,ITGAM,ITGB2,BTK,C3
GO: Biological Process	GO:1902624	positive regulation of neutrophil migration			1.21e-06	0.00759	1.263e-05	0.0001177	8	37	SELL,CXCL8,CXCR2,C3AR1,C5AR1,RAC2,EDNRA,NCKAP1L
GO: Biological Process	GO:0032729	positive regulation of interferon-gamma production			1.319e-06	0.008273	1.374e-05	0.0001281	11	79	HLA-DPA1,HLA-DPB1,CLEC7A,TLR7,CCR2,IRF8,PYCARD,RIPK2,PTPN22,CD14,TLR4
GO: Biological Process	GO:0045637	regulation of myeloid cell differentiation			1.557e-06	0.009766	1.619e-05	0.000151	21	283	CEBPB,EVI2B,TYROBP,FBN1,CCR1,CCL5,GPR171,FAS,INHBA,RASSF2,LILRB1,LILRB4,LEP,LGALS3,THBS1,LOX,TLR4,TREM2,LYN,HCLS1,NCKAP1L
GO: Biological Process	GO:0097756	negative regulation of blood vessel diameter			1.662e-06	0.01042	1.726e-05	0.0001609	13	115	ACTA2,AHR,HRH1,MMP2,ALOX5,COMP,ICAM1,PTAFR,PTGS2,TBXAS1,LEP,EDNRA,CD38
GO: Biological Process	GO:0060263	regulation of respiratory burst			1.707e-06	0.01071	1.761e-05	0.0001642	6	18	CLEC7A,JCHAIN,SLAMF8,RAC2,GRN,DUSP10
GO: Biological Process	GO:0034134	toll-like receptor 2 signaling pathway			1.707e-06	0.01071	1.761e-05	0.0001642	6	18	RIPK2,NOD2,TLR1,TLR2,TNFAIP3,LYN
GO: Biological Process	GO:0046629	gamma-delta T cell activation			1.707e-06	0.01071	1.761e-05	0.0001642	6	18	MICB,LILRB1,NOD2,PTPRC,EGR3,NCKAP1L
GO: Biological Process	GO:0010878	cholesterol storage			1.707e-06	0.01071	1.761e-05	0.0001642	6	18	ABCA1,PPARG,MSR1,ABCG1,SOAT1,CD36
GO: Biological Process	GO:0032733	positive regulation of interleukin-10 production			1.855e-06	0.01163	1.91e-05	0.0001781	8	39	CLEC7A,FCER1G,PYCARD,NOD2,CD28,TLR2,TLR4,TREM2
GO: Biological Process	GO:0042133	neurotransmitter metabolic process			1.91e-06	0.01198	1.964e-05	0.0001831	16	175	ACP5,CLEC7A,HRH1,AIF1,ICAM1,SLC1A3,IGF1,IL6,IL10,ITGB2,PTGIS,PTGS2,SDS,CD36,TLR2,TLR4
GO: Biological Process	GO:0001101	response to acid chemical			1.954e-06	0.01225	2.006e-05	0.0001869	25	386	ABCA1,CEBPB,PDGFRA,SERPINF1,MICB,MMP2,COL1A1,COL1A2,COL3A1,COL5A2,COL16A1,FOLR2,ICAM1,PPARG,SLC1A3,CYBB,PTAFR,PTGDR,PTGS2,LEP,CD36,CD38,TLR2,TLR4,LYN
GO: Biological Process	GO:0010959	regulation of metal ion transport			1.986e-06	0.01246	2.035e-05	0.0001897	28	465	LILRB2,KCNE4,CLIC2,PIK3CG,CXCL9,AHR,CCL2,CCR1,CCL4,CCL5,PLN,SLC31A2,ICAM1,IGF1,MYO5A,FXYD5,PTPN22,LILRB1,GEM,PTGS2,CD84,EDNRA,LGALS3,CORO1A,CD33,SERPINE1,TREM2,LYN
GO: Biological Process	GO:0002335	mature B cell differentiation			1.997e-06	0.01252	2.043e-05	0.0001904	7	28	ADA,FCGR2B,DOCK10,SLAMF8,GPR183,LGALS1,TNFAIP3
GO: Biological Process	GO:0033002	muscle cell proliferation			2.059e-06	0.01291	2.103e-05	0.0001961	21	288	EREG,HMOX1,AIF1,CCL5,MMP2,MMP9,CNN1,PPARG,IGF1,IL6,IL10,GATA6,PTAFR,PTGS2,CCN4,C3AR1,OGN,EDNRA,ZFPM2,THBS1,TNFAIP3
GO: Biological Process	GO:0002887	negative regulation of myeloid leukocyte mediated immunity			2.175e-06	0.01364	2.211e-05	0.0002061	5	11	CD300A,HMOX1,CCR2,FCGR2B,CD84
GO: Biological Process	GO:0046643	regulation of gamma-delta T cell activation			2.175e-06	0.01364	2.211e-05	0.0002061	5	11	LILRB1,NOD2,PTPRC,EGR3,NCKAP1L
GO: Biological Process	GO:0035747	natural killer cell chemotaxis			2.175e-06	0.01364	2.211e-05	0.0002061	5	11	PIK3CG,CCL2,CCL4,CCL5,CCL7
GO: Biological Process	GO:0002761	regulation of myeloid leukocyte differentiation			2.683e-06	0.01683	2.723e-05	0.0002538	14	139	CEBPB,EVI2B,TYROBP,FBN1,CCR1,CCL5,INHBA,RASSF2,LILRB1,LILRB4,TLR4,TREM2,LYN,HCLS1
GO: Biological Process	GO:0008360	regulation of cell shape			2.924e-06	0.01834	2.962e-05	0.0002761	15	160	CCL2,CCL7,CCL11,FGR,FN1,ANXA1,ICAM1,GAS7,RND3,IL6,ITGB2,LST1,CORO1A,PLXNC1,HCK
GO: Biological Process	GO:0050854	regulation of antigen receptor-mediated signaling pathway			3.155e-06	0.01979	3.187e-05	0.000297	10	70	CD300A,ADA,FCGR2B,LPXN,PTPN22,PTPRC,TRAT1,LILRB4,LGALS3,LYN
GO: Biological Process	GO:0072678	T cell migration			3.155e-06	0.01979	3.187e-05	0.000297	10	70	CCR2,PIK3CG,AIF1,CCL2,CCL5,CCL20,ICAM1,PYCARD,ITGA4,GPR183
GO: Biological Process	GO:0045936	negative regulation of phosphate metabolic process			3.269e-06	0.02051	3.297e-05	0.0003073	34	646	CD300A,CORO1C,FABP4,TWIST1,FBLN1,AHR,PLEK,SFRP4,GMFG,APOC1,APOE,IGF1,PYCARD,IL6,PHACTR1,INHBA,RASSF2,PTPN22,SAMSN1,PTPRC,TIGAR,NIBAN1,SH2B3,NUPR1,EMILIN1,RGS2,LGALS3,TLR4,IRAK3,DUSP10,TNFAIP3,GREM1,LYN,NCKAP1L
GO: Biological Process	GO:0002861	regulation of inflammatory response to antigenic stimulus			3.304e-06	0.02072	3.326e-05	0.00031	7	30	FCER1G,FCGR2B,IL10,NOD2,BTK,C3,CD28
GO: Biological Process	GO:2000403	positive regulation of lymphocyte migration			3.357e-06	0.02106	3.374e-05	0.0003145	8	42	CCR2,AIF1,CCL4,CCL5,CCL7,CCL20,PYCARD,ITGA4
GO: Biological Process	GO:0010563	negative regulation of phosphorus metabolic process			3.381e-06	0.02121	3.393e-05	0.0003163	34	647	CD300A,CORO1C,FABP4,TWIST1,FBLN1,AHR,PLEK,SFRP4,GMFG,APOC1,APOE,IGF1,PYCARD,IL6,PHACTR1,INHBA,RASSF2,PTPN22,SAMSN1,PTPRC,TIGAR,NIBAN1,SH2B3,NUPR1,EMILIN1,RGS2,LGALS3,TLR4,IRAK3,DUSP10,TNFAIP3,GREM1,LYN,NCKAP1L
GO: Biological Process	GO:0033033	negative regulation of myeloid cell apoptotic process			3.433e-06	0.02153	3.434e-05	0.0003201	6	20	CLEC5A,FCER1G,CCL5,CCR5,CXCR2,NOD2
GO: Biological Process	GO:0002523	leukocyte migration involved in inflammatory response			3.433e-06	0.02153	3.434e-05	0.0003201	6	20	S100A8,S100A9,CCL2,SLAMF8,ITGAM,ITGB2
GO: Biological Process	GO:0071220	cellular response to bacterial lipoprotein			3.462e-06	0.02171	3.446e-05	0.0003212	4	6	CD14,CD36,TLR1,TLR2
GO: Biological Process	GO:0071221	cellular response to bacterial lipopeptide			3.462e-06	0.02171	3.446e-05	0.0003212	4	6	CD14,CD36,TLR1,TLR2
GO: Biological Process	GO:0070339	response to bacterial lipopeptide			3.462e-06	0.02171	3.446e-05	0.0003212	4	6	CD14,CD36,TLR1,TLR2
GO: Biological Process	GO:0098883	synapse pruning			3.661e-06	0.02296	3.633e-05	0.0003386	5	12	ITGAM,C1QA,C1QB,C3,TREM2
GO: Biological Process	GO:0032621	interleukin-18 production			3.661e-06	0.02296	3.633e-05	0.0003386	5	12	IL10,NOD2,CD84,NLRP3,TLR2
GO: Biological Process	GO:0090066	regulation of anatomical structure size			3.693e-06	0.02316	3.659e-05	0.0003411	32	592	ACTA2,HMOX1,ADORA2B,AHR,HRH1,CCL11,MMP2,PLEK,ALOX5,VAV1,COMP,FN1,ICAM1,GMFG,APOE,PYCARD,IL7R,PTAFR,PTGS2,KCNMA1,TBXAS1,CAPG,RGS2,ARPC1B,LEP,EDNRA,CORO1A,CD38,TLR2,HCK,HCLS1,NCKAP1L
GO: Biological Process	GO:0002832	negative regulation of response to biotic stimulus			3.713e-06	0.02329	3.673e-05	0.0003424	12	105	VSIG4,MICB,MMP12,SAMHD1,PPARG,CR1,SLAMF8,LILRB1,GRN,IRAK3,DUSP10,TNFAIP3
GO: Biological Process	GO:0009628	response to abiotic stimulus			3.753e-06	0.02354	3.707e-05	0.0003455	57	1375	SERPINF1,TLR7,HMOX1,CHI3L1,ADA,PLAC8,TWIST1,MFAP4,MICB,UCP2,HRH1,AIF1,CCL2,CCL7,CCL11,MMP2,HSPA6,COL1A1,COL3A1,TFEC,GPR65,ANXA1,ICAM1,RGCC,BAG2,NABP1,PPARG,FAS,SLC1A3,AQP9,POSTN,IGF1,PIEZO2,CTSS,CYBB,LGMN,GATA6,PTAFR,DCN,PTGIS,PTGS2,PTPRC,KCNMA1,TIGAR,CASP1,MCOLN1,LEP,EDNRA,THBD,THBS1,CD14,CD36,CD38,TLR2,TLR4,CYB5R4,LYN
GO: Biological Process	GO:0034122	negative regulation of toll-like receptor signaling pathway			4.045e-06	0.02537	3.989e-05	0.0003718	8	43	CD300A,LY96,NOD2,CD14,TLR4,IRAK3,TNFAIP3,LYN
GO: Biological Process	GO:1903428	positive regulation of reactive oxygen species biosynthetic process			4.099e-06	0.02571	4.035e-05	0.0003761	10	72	CLEC7A,HRH1,AIF1,ICAM1,IL6,ITGB2,PTGS2,CD36,TLR2,TLR4
GO: Biological Process	GO:0071827	plasma lipoprotein particle organization			4.104e-06	0.02574	4.035e-05	0.0003761	12	106	ABCA1,HMOX1,PLTP,APOC1,APOE,MSR1,ABCG1,SOAT1,NPC1,PLA2G7,LIPA,CD36
GO: Biological Process	GO:0031099	regeneration			4.133e-06	0.02592	4.057e-05	0.0003782	18	230	CEBPB,HMOX1,MMP2,PRRX1,ANXA1,APOE,PPARG,FAS,POSTN,IGF1,IL10,NINJ2,C5AR1,NNMT,GRN,LCP1,SERPINE1,DUSP10
GO: Biological Process	GO:0002507	tolerance induction			4.186e-06	0.02626	4.103e-05	0.0003824	7	31	LILRB2,CLC,C3AR1,CD86,IRAK3,TNFAIP3,LYN
GO: Biological Process	GO:0070838	divalent metal ion transport			4.201e-06	0.02635	4.103e-05	0.0003824	30	539	LILRB2,CLIC2,PIK3CG,CXCL9,AHR,HRH1,CCL2,CCR1,CCL4,CCL5,CCR5,CCL8,PLN,ICAM1,IGF1,MYO5A,PTPN22,LILRB1,GEM,PTGS2,CD84,PTPRC,MCUB,MCOLN1,EDNRA,LGALS3,CORO1A,CD33,SERPINE1,LYN
GO: Biological Process	GO:1900047	negative regulation of hemostasis			4.206e-06	0.02638	4.103e-05	0.0003824	9	57	PDGFRA,FAP,PLAUR,COMP,APOE,SH2B3,THBD,THBS1,SERPINE1
GO: Biological Process	GO:0002437	inflammatory response to antigenic stimulus			4.206e-06	0.02638	4.103e-05	0.0003824	9	57	FCER1G,FCGR2B,ICAM1,CXCR2,IL10,NOD2,BTK,C3,CD28
GO: Biological Process	GO:0046660	female sex differentiation			4.422e-06	0.02774	4.307e-05	0.0004015	14	145	EREG,CEBPB,PDGFRA,AHR,FGF7,MMP2,MERTK,ICAM1,INHBA,NUPR1,LEP,ZFPM2,SERPINE1,LHFPL2
GO: Biological Process	GO:0050868	negative regulation of T cell activation			4.658e-06	0.02921	4.529e-05	0.0004222	13	126	CEBPB,LILRB2,CD300A,VSIG4,FCGR2B,GPNMB,ANXA1,IL10,PTPN22,LILRB1,LGALS3,CD86,CD44
GO: Biological Process	GO:0051224	negative regulation of protein transport			4.666e-06	0.02927	4.531e-05	0.0004223	18	232	FBLN1,FCGR2B,UCP2,FN1,ANXA1,RGCC,APOE,RSAD2,SRGN,IL6,IL10,PTPN22,LILRB1,CD84,IL33,NLRP3,CD36,TNFAIP3
GO: Biological Process	GO:0002313	mature B cell differentiation involved in immune response			4.716e-06	0.02958	4.571e-05	0.0004261	6	21	ADA,FCGR2B,DOCK10,GPR183,LGALS1,TNFAIP3
GO: Biological Process	GO:0008217	regulation of blood pressure			4.857e-06	0.03046	4.701e-05	0.0004382	17	210	CES1,ACTA2,HMOX1,AHR,COL1A2,CPA3,PPARG,POSTN,CTSZ,NCF2,PTAFR,PTGS2,ERAP2,C3AR1,LEP,EDNRA,CD36
GO: Biological Process	GO:0002889	regulation of immunoglobulin mediated immune response			4.882e-06	0.03062	4.711e-05	0.0004391	9	58	FCER1G,FCGR2B,CR1,IL10,NOD2,PTPRC,BTK,C3,CD28
GO: Biological Process	GO:0002712	regulation of B cell mediated immunity			4.882e-06	0.03062	4.711e-05	0.0004391	9	58	FCER1G,FCGR2B,CR1,IL10,NOD2,PTPRC,BTK,C3,CD28
GO: Biological Process	GO:0051216	cartilage development			4.956e-06	0.03108	4.774e-05	0.000445	18	233	CHI3L1,MGP,COL14A1,COL1A1,COL6A3,PRRX1,COMP,CCN1,CCN4,SULF1,EPYC,LEP,TGFBI,THBS1,TIMP1,CD44,GREM1,LUM
GO: Biological Process	GO:0010038	response to metal ion			4.989e-06	0.03129	4.8e-05	0.0004474	25	407	CYBRD1,SERPINF1,TCIRG1,HMOX1,ADCY7,FABP4,S100A8,MMP9,PLN,ALOX5AP,FN1,ICAM1,PPARG,FAS,AQP9,CYBB,LGMN,PTGS2,KCNMA1,C1QA,NPC1,TIGAR,MCOLN1,THBS1,CD14
GO: Biological Process	GO:0072511	divalent inorganic cation transport			5.42e-06	0.034	5.206e-05	0.0004853	30	546	LILRB2,CLIC2,PIK3CG,CXCL9,AHR,HRH1,CCL2,CCR1,CCL4,CCL5,CCR5,CCL8,PLN,ICAM1,IGF1,MYO5A,PTPN22,LILRB1,GEM,PTGS2,CD84,PTPRC,MCUB,MCOLN1,EDNRA,LGALS3,CORO1A,CD33,SERPINE1,LYN
GO: Biological Process	GO:0002720	positive regulation of cytokine production involved in immune response			5.649e-06	0.03543	5.417e-05	0.000505	9	59	FCER1G,RSAD2,IL6,LILRB1,NOD2,NLRP3,CD36,TLR2,TLR4
GO: Biological Process	GO:0050691	regulation of defense response to virus by host			5.784e-06	0.03628	5.538e-05	0.0005162	8	45	MICB,CCL5,MMP12,AIM2,PYCARD,PTPN22,LILRB1,TNFAIP3
GO: Biological Process	GO:0043301	negative regulation of leukocyte degranulation			5.84e-06	0.03663	5.575e-05	0.0005197	5	13	CD300A,HMOX1,CCR2,FCGR2B,CD84
GO: Biological Process	GO:0002430	complement receptor mediated signaling pathway			5.84e-06	0.03663	5.575e-05	0.0005197	5	13	FPR1,FPR3,CR1,C3AR1,C5AR1
GO: Biological Process	GO:0051346	negative regulation of hydrolase activity			6.046e-06	0.03792	5.755e-05	0.0005364	28	493	SERPINF1,AHR,PLAUR,PLEK,MMP9,PLN,COL6A3,ANXA1,APOC1,CR1,IGF1,LAMP3,CSTA,CSTB,IL6,PHACTR1,NAIP,PTGS2,C3,RARRES1,RGS2,LGALS3,THBS1,TIMP1,TIMP2,SERPINE1,CD44,NCKAP1L
GO: Biological Process	GO:0097006	regulation of plasma lipoprotein particle levels			6.056e-06	0.03798	5.755e-05	0.0005364	12	110	ABCA1,HMOX1,PLTP,APOC1,APOE,MSR1,ABCG1,SOAT1,NPC1,PLA2G7,LIPA,CD36
GO: Biological Process	GO:0071825	protein-lipid complex subunit organization			6.056e-06	0.03798	5.755e-05	0.0005364	12	110	ABCA1,HMOX1,PLTP,APOC1,APOE,MSR1,ABCG1,SOAT1,NPC1,PLA2G7,LIPA,CD36
GO: Biological Process	GO:0030278	regulation of ossification			6.28e-06	0.03939	5.95e-05	0.0005546	18	237	CEBPB,TCIRG1,TWIST1,MGP,AHR,CCR1,COMP,BMP2K,AREG,RSAD2,IGF1,CCN1,SRGN,IL6,RASSF2,CCN4,EGR2,GREM1
GO: Biological Process	GO:1904950	negative regulation of establishment of protein localization			6.28e-06	0.03939	5.95e-05	0.0005546	18	237	FBLN1,FCGR2B,UCP2,FN1,ANXA1,RGCC,APOE,RSAD2,SRGN,IL6,IL10,PTPN22,LILRB1,CD84,IL33,NLRP3,CD36,TNFAIP3
GO: Biological Process	GO:0061082	myeloid leukocyte cytokine production			6.545e-06	0.04105	6.192e-05	0.0005772	7	33	HMOX1,FCER1G,LILRB1,CD36,TLR2,TLR4,IRAK3
GO: Biological Process	GO:0046545	development of primary female sexual characteristics			6.587e-06	0.04131	6.222e-05	0.0005799	13	130	EREG,CEBPB,PDGFRA,AHR,FGF7,MMP2,ICAM1,INHBA,NUPR1,LEP,ZFPM2,SERPINE1,LHFPL2
GO: Biological Process	GO:0006801	superoxide metabolic process			6.743e-06	0.04229	6.36e-05	0.0005928	10	76	ACP5,CLEC7A,TYROBP,CYBB,NCF2,NCF4,ITGAM,ITGB2,CD36,CYB5R4
GO: Biological Process	GO:1905521	regulation of macrophage migration			6.867e-06	0.04307	6.467e-05	0.0006028	8	46	CCL2,CCL5,SLAMF8,C3AR1,C5AR1,EMILIN1,THBS1,TREM2
GO: Biological Process	GO:0001936	regulation of endothelial cell proliferation			7.267e-06	0.04558	6.823e-05	0.000636	16	194	HMOX1,ADORA2B,CCL2,CCL11,RGCC,APOE,PPARG,IGF1,IL10,ITGA4,NRP2,SULF1,SCG2,LEP,THBS1,EGR3
GO: Biological Process	GO:0060759	regulation of response to cytokine stimulus			7.267e-06	0.04558	6.823e-05	0.000636	16	194	CCL5,MMP12,SAMHD1,PPARG,PYCARD,IL1RN,IL6,RIPK2,PTPRC,SH2B3,CASP1,TLR2,TLR4,TREM2,IRAK3,TNFAIP3
GO: Biological Process	GO:0051347	positive regulation of transferase activity			7.427e-06	0.04658	6.963e-05	0.000649	36	731	EREG,PDGFRA,CD300A,CHI3L1,ADCY7,ADORA2B,S100A12,PIK3CG,CCL5,GPNMB,FGR,MAP3K8,FPR1,RGCC,IGF1,CCN1,IL1RN,RASSF2,RIPK2,ZEB2,NOD2,STK4,PTPRC,C5AR1,TIGAR,RAP2B,LCP2,LEP,EDNRA,THBS1,TLR1,TLR4,CD44,GREM1,LYN,NCKAP1L
GO: Biological Process	GO:0043542	endothelial cell migration			7.481e-06	0.04692	7.003e-05	0.0006528	20	288	SERPINF1,HMOX1,ADORA2B,FAP,ANXA1,RGCC,APOE,PPARG,IGF1,LGMN,DCN,ITGB2,PTGS2,NRP2,SRPX2,SCG2,GRN,THBS1,EGR3,GREM1
GO: Biological Process	GO:0009887	animal organ morphogenesis			7.567e-06	0.04746	7.073e-05	0.0006593	52	1240	EREG,CEBPB,PDGFRA,ACP5,ACTA2,ACTG2,TCIRG1,TWIST1,FBN1,MGP,BASP1,AHR,CCL2,FGF7,COL14A1,CCL11,MMP2,ALDH1A3,FGR,COL1A1,COL1A2,COL3A1,COL5A1,FLI1,COL5A2,COL6A3,COL8A1,COL8A2,PRRX1,SFRP4,COMP,AREG,IGF1,CCN1,CTSD,IL6,CTSZ,MYO5A,INHBA,ASPN,GATA6,DCN,ITGAX,NRP2,SULF1,EDNRA,ZFPM2,THBS1,SERPINE1,CD44,TNFAIP3,GREM1
GO: Biological Process	GO:0010518	positive regulation of phospholipase activity			7.666e-06	0.04808	7.155e-05	0.0006669	14	152	PDGFRA,HRH1,CCL5,GPR65,FPR1,FPR3,CCN1,CXCR2,PTAFR,ITK,C3AR1,GNA15,C5AR1,EDNRA
GO: Biological Process	GO:0032493	response to bacterial lipoprotein			7.935e-06	0.04977	7.395e-05	0.0006893	4	7	CD14,CD36,TLR1,TLR2
GO: Biological Process	GO:0010951	negative regulation of endopeptidase activity			8.015e-06	0.05027	7.458e-05	0.0006952	19	265	SERPINF1,PLAUR,MMP9,COL6A3,CR1,IGF1,LAMP3,CSTA,CSTB,IL6,NAIP,PTGS2,C3,RARRES1,THBS1,TIMP1,TIMP2,SERPINE1,CD44
GO: Biological Process	GO:0050873	brown fat cell differentiation			8.117e-06	0.05091	7.497e-05	0.0006988	8	47	CEBPB,PLAC8,FABP4,PPARG,PTGS2,RGS2,LEP,DUSP10
GO: Biological Process	GO:0014002	astrocyte development			8.117e-06	0.05091	7.497e-05	0.0006988	8	47	S100A8,S100A9,IL6,C1QA,C5AR1,GRN,TLR4,TREM2
GO: Biological Process	GO:1904646	cellular response to amyloid-beta			8.117e-06	0.05091	7.497e-05	0.0006988	8	47	FCGR2B,ICAM1,IGF1,LGMN,ITGA4,CD36,TLR4,TREM2
GO: Biological Process	GO:0097028	dendritic cell differentiation			8.117e-06	0.05091	7.497e-05	0.0006988	8	47	CEBPB,LILRB2,FCGR2B,LILRB1,LGALS1,LGALS3,TREM2,LYN
GO: Biological Process	GO:0010883	regulation of lipid storage			8.117e-06	0.05091	7.497e-05	0.0006988	8	47	ABCA1,PPARG,MSR1,ABCG1,IL6,C3,LEP,CD36
GO: Biological Process	GO:0019935	cyclic-nucleotide-mediated signaling			8.181e-06	0.05131	7.546e-05	0.0007033	22	340	ABCA1,ADGRE2,ADCY7,ADORA2B,CXCL9,AHR,HRH1,CCL2,CCR1,PLN,GPR65,ANXA1,FPR1,APOE,MARCO,PTGDR,GNA15,RGS1,RGS2,EDNRA,THBS1,CD36
GO: Biological Process	GO:0051248	negative regulation of protein metabolic process			8.224e-06	0.05158	7.574e-05	0.000706	53	1277	LILRB2,CD300A,CORO1C,SERPINF1,FABP4,TWIST1,TYROBP,FBLN1,SPON1,PLAUR,MMP9,COL6A3,SFRP4,BAG2,GMFG,APOE,CR1,IGF1,PYCARD,LAMP3,CSTA,CSTB,IL6,CTSZ,PHACTR1,IL10,INHBA,RASSF2,NAIP,PTPN22,SAMSN1,LILRB1,PTGS2,PTPRC,C3,NIBAN1,RARRES1,SH2B3,EMILIN1,RGS2,LGALS3,THBS1,TIMP1,TIMP2,TLR4,SERPINE1,CD44,IRAK3,DUSP10,TNFAIP3,GREM1,LYN,NCKAP1L
GO: Biological Process	GO:0071404	cellular response to low-density lipoprotein particle stimulus			8.448e-06	0.05299	7.77e-05	0.0007242	6	23	ABCA1,FCER1G,PPARG,ITGB2,NPC1,CD36
GO: Biological Process	GO:0061844	antimicrobial humoral immune response mediated by antimicrobial peptide			8.545e-06	0.0536	7.824e-05	0.0007293	10	78	S100A9,S100A12,CXCL9,CCL2,PPBP,CXCL8,NOD2,CXCL2,CXCL3,RNASE6
GO: Biological Process	GO:0002260	lymphocyte homeostasis			8.545e-06	0.0536	7.824e-05	0.0007293	10	78	TCIRG1,ADA,AHR,DOCK10,FAS,CORO1A,CD44,TNFAIP3,LYN,NCKAP1L
GO: Biological Process	GO:0045670	regulation of osteoclast differentiation			8.545e-06	0.0536	7.824e-05	0.0007293	10	78	CEBPB,TYROBP,FBN1,CCR1,CCL5,RASSF2,LILRB1,LILRB4,TLR4,TREM2
GO: Biological Process	GO:0045834	positive regulation of lipid metabolic process			8.796e-06	0.05517	8.042e-05	0.0007496	15	175	PDGFRA,TWIST1,ADORA2B,FGR,ANXA1,APOC1,APOE,PPARG,ABCG1,IGF1,CCN1,PTGS2,NOD2,CD36,LYN
GO: Biological Process	GO:0070431	nucleotide-binding oligomerization domain containing 2 signaling pathway			8.919e-06	0.05594	8.131e-05	0.0007579	5	14	RIPK2,PTPN22,NOD2,TLR4,TNFAIP3
GO: Biological Process	GO:0002679	respiratory burst involved in defense response			8.919e-06	0.05594	8.131e-05	0.0007579	5	14	PIK3CG,SLAMF8,GRN,DUSP10,HCK
GO: Biological Process	GO:0030029	actin filament-based process			9.168e-06	0.0575	8.345e-05	0.0007779	39	830	PDGFRA,CORO1C,ACTA2,ACTN1,S100A9,TYROBP,KCNE4,AIF1,FGF7,CCL11,FGR,PLEK,PLN,CNN1,GPR65,ANXA1,ICAM1,RGCC,GMFG,GAS7,RND3,ARHGDIB,PYCARD,MYO1F,PHACTR1,MYO5A,PDLIM3,ARHGAP25,RAC2,DOCK2,DPYSL3,CAPG,LCP1,ARPC1B,CORO1A,TLR2,HCK,HCLS1,NCKAP1L
GO: Biological Process	GO:0034113	heterotypic cell-cell adhesion			9.838e-06	0.0617	8.942e-05	0.0008335	9	63	LILRB2,IL1RN,IL10,ITGA4,ITGAX,ITGB2,PTPRC,CD44,TNFAIP3
GO: Biological Process	GO:0002724	regulation of T cell cytokine production			9.916e-06	0.06219	9e-05	0.0008389	7	35	CCR2,CLC,CCL20,RSAD2,IL6,NLRP3,TNFRSF1B
GO: Biological Process	GO:1902532	negative regulation of intracellular signal transduction			1.007e-05	0.06316	9.127e-05	0.0008507	34	681	CD300A,ADCY7,TWIST1,FBLN1,CLIC2,PLAUR,PLEK,MMP9,SFRP4,APOE,IGF1,PYCARD,MARCO,RASSF2,PTPN22,BCL2A1,PTGS2,PTPRC,ACKR3,ARHGAP25,SH2B3,RGS1,EMILIN1,RGS2,EDNRA,NLRP3,THBS1,TIMP2,TLR4,CD44,IRAK3,DUSP10,TNFAIP3,LYN
GO: Biological Process	GO:0044419	interspecies interaction between organisms			1.027e-05	0.06441	9.295e-05	0.0008664	43	960	CFH,PDGFRA,CLEC5A,HLA-DRA,CLEC7A,CCR2,S100A9,S100A12,FBLN1,FCGR2B,FCN1,MICB,CCL2,CCL4,CCL5,CCR5,CCL8,MMP1,EEA1,MMP9,MRC1,FN1,PILRA,ICAM1,APOE,CR1,RSAD2,LAMP3,CXCL8,LRRC15,NRP2,ACKR3,C1QA,NPC1,DOCK2,LGALS1,CD28,CD86,TLR2,TREM1,LYN,LYZ,HCK
GO: Biological Process	GO:0009612	response to mechanical stimulus			1.049e-05	0.06581	9.482e-05	0.0008838	18	246	TLR7,CHI3L1,MMP2,COL1A1,COL3A1,PPARG,FAS,SLC1A3,POSTN,IGF1,PIEZO2,DCN,PTGS2,CASP1,EDNRA,THBS1,CD36,TLR4
GO: Biological Process	GO:0030449	regulation of complement activation			1.051e-05	0.0659	9.482e-05	0.0008838	12	116	CFH,VSIG4,CR1,IGKC,IGLC1,C1QA,C1QB,C1R,C1S,C3,C3AR1,C5AR1
GO: Biological Process	GO:0002312	B cell activation involved in immune response			1.075e-05	0.06742	9.686e-05	0.0009029	10	80	ADA,FCGR2B,DOCK10,IL10,PTPRC,GPR183,LGALS1,CD28,TLR4,TNFAIP3
GO: Biological Process	GO:0150064	vertebrate eye-specific patterning			1.11e-05	0.06961	9.832e-05	0.0009165	3	3	ITGAM,C1QA,C3
GO: Biological Process	GO:2000363	positive regulation of prostaglandin-E synthase activity			1.11e-05	0.06961	9.832e-05	0.0009165	3	3	ITGAM,ITGB2,NOD2
GO: Biological Process	GO:2000361	regulation of prostaglandin-E synthase activity			1.11e-05	0.06961	9.832e-05	0.0009165	3	3	ITGAM,ITGB2,NOD2
GO: Biological Process	GO:0032701	negative regulation of interleukin-18 production			1.11e-05	0.06961	9.832e-05	0.0009165	3	3	IL10,NOD2,CD84
GO: Biological Process	GO:2001202	negative regulation of transforming growth factor-beta secretion			1.11e-05	0.06961	9.832e-05	0.0009165	3	3	FBLN1,FN1,LILRB1
GO: Biological Process	GO:0090264	regulation of immune complex clearance by monocytes and macrophages			1.11e-05	0.06961	9.832e-05	0.0009165	3	3	CCR2,FCGR2B,CCL2
GO: Biological Process	GO:0071727	cellular response to triacyl bacterial lipopeptide			1.11e-05	0.06961	9.832e-05	0.0009165	3	3	CD14,TLR1,TLR2
GO: Biological Process	GO:0071725	response to triacyl bacterial lipopeptide			1.11e-05	0.06961	9.832e-05	0.0009165	3	3	CD14,TLR1,TLR2
GO: Biological Process	GO:0038123	toll-like receptor TLR1:TLR2 signaling pathway			1.11e-05	0.06961	9.832e-05	0.0009165	3	3	CD14,TLR1,TLR2
GO: Biological Process	GO:0002774	Fc receptor mediated inhibitory signaling pathway			1.11e-05	0.06961	9.832e-05	0.0009165	3	3	LILRB2,LILRB1,LYN
GO: Biological Process	GO:0002436	immune complex clearance by monocytes and macrophages			1.11e-05	0.06961	9.832e-05	0.0009165	3	3	CCR2,FCGR2B,CCL2
GO: Biological Process	GO:0002540	leukotriene production involved in inflammatory response			1.11e-05	0.06961	9.832e-05	0.0009165	3	3	ALOX5,ALOX5AP,SERPINE1
GO: Biological Process	GO:0002686	negative regulation of leukocyte migration			1.12e-05	0.07023	9.906e-05	0.0009233	8	49	CD300A,HMOX1,ADA,CCL2,SLAMF8,IL33,EMILIN1,GREM1
GO: Biological Process	GO:0002708	positive regulation of lymphocyte mediated immunity			1.148e-05	0.07198	0.0001014	0.000945	12	117	FCER1G,MICB,VAV1,RSAD2,IL6,NOD2,PTPRC,BTK,C3,NLRP3,CD28,CRTAM
GO: Biological Process	GO:0007015	actin filament organization			1.187e-05	0.07446	0.0001047	0.0009762	25	428	CORO1C,ACTN1,AIF1,CCL11,PLEK,GPR65,ICAM1,RGCC,GMFG,GAS7,RND3,PYCARD,PHACTR1,PDLIM3,ARHGAP25,RAC2,DPYSL3,CAPG,LCP1,ARPC1B,CORO1A,TLR2,HCK,HCLS1,NCKAP1L
GO: Biological Process	GO:0001782	B cell homeostasis			1.208e-05	0.07574	0.0001062	0.0009901	7	36	ADA,AHR,DOCK10,CD44,TNFAIP3,LYN,NCKAP1L
GO: Biological Process	GO:0043372	positive regulation of CD4-positive, alpha-beta T cell differentiation			1.208e-05	0.07574	0.0001062	0.0009901	7	36	CCR2,ANXA1,IL6,RIPK2,NLRP3,CD86,NCKAP1L
GO: Biological Process	GO:0019216	regulation of lipid metabolic process			1.214e-05	0.07617	0.0001067	0.0009944	26	456	ABCA1,PDGFRA,ME1,FABP5,PLIN2,TWIST1,ADORA2B,PIK3CG,HRH1,FGR,ANXA1,RUBCNL,APOC1,APOE,PPARG,ABCG1,IGF1,CCN1,PTGS2,NOD2,KCNMA1,C3,GLIPR1,LEP,CD36,LYN
GO: Biological Process	GO:0030036	actin cytoskeleton organization			1.24e-05	0.07777	0.0001088	0.001014	35	718	PDGFRA,CORO1C,ACTN1,S100A9,TYROBP,AIF1,FGF7,CCL11,FGR,PLEK,CNN1,GPR65,ANXA1,ICAM1,RGCC,GMFG,GAS7,RND3,ARHGDIB,PYCARD,MYO1F,PHACTR1,PDLIM3,ARHGAP25,RAC2,DOCK2,DPYSL3,CAPG,LCP1,ARPC1B,CORO1A,TLR2,HCK,HCLS1,NCKAP1L
GO: Biological Process	GO:0015918	sterol transport			1.252e-05	0.07854	0.0001097	0.001023	12	118	ABCA1,CES1,PLTP,APOC1,APOE,PPARG,MSR1,ABCG1,SOAT1,NPC1,LEP,CD36
GO: Biological Process	GO:0010712	regulation of collagen metabolic process			1.278e-05	0.08014	0.0001116	0.00104	9	65	ADORA2B,FAP,MFAP4,CCL2,RGCC,PPARG,IL6,EMILIN1,SERPINE1
GO: Biological Process	GO:0007566	embryo implantation			1.278e-05	0.08014	0.0001116	0.00104	9	65	FBLN1,MMP2,MMP9,MMP12,ARHGDIB,PTGIS,PTGS2,GRN,TIMP1
GO: Biological Process	GO:0098543	detection of other organism			1.314e-05	0.08238	0.0001144	0.001067	5	15	CLEC7A,NOD2,TLR1,TLR2,TLR4
GO: Biological Process	GO:0090594	inflammatory response to wounding			1.314e-05	0.08238	0.0001144	0.001067	5	15	HMOX1,CCR2,GRN,TIMP1,CD44
GO: Biological Process	GO:0035588	G protein-coupled purinergic receptor signaling pathway			1.427e-05	0.08953	0.0001242	0.001157	6	25	ADA,ADORA2B,ADORA3,GPR171,PTAFR,P2RY14
GO: Biological Process	GO:0032964	collagen biosynthetic process			1.451e-05	0.09099	0.0001259	0.001173	9	66	ADORA2B,CCL2,COL1A1,COL5A1,RGCC,PPARG,IL6,EMILIN1,SERPINE1
GO: Biological Process	GO:0006026	aminoglycan catabolic process			1.451e-05	0.09099	0.0001259	0.001173	9	66	CHIT1,VCAN,SDC3,FUCA1,DCN,HPSE,OGN,CD44,LUM
GO: Biological Process	GO:0046632	alpha-beta T cell differentiation			1.487e-05	0.09326	0.0001288	0.001201	12	120	ADA,CCR2,CCL20,ANXA1,RSAD2,IL6,RIPK2,ITK,GPR183,NLRP3,CD86,NCKAP1L
GO: Biological Process	GO:0010466	negative regulation of peptidase activity			1.501e-05	0.09412	0.0001298	0.00121	19	277	SERPINF1,PLAUR,MMP9,COL6A3,CR1,IGF1,LAMP3,CSTA,CSTB,IL6,NAIP,PTGS2,C3,RARRES1,THBS1,TIMP1,TIMP2,SERPINE1,CD44
GO: Biological Process	GO:0001915	negative regulation of T cell mediated cytotoxicity			1.559e-05	0.09779	0.0001343	0.001252	4	8	FCGR2B,IL7R,LILRB1,PTPRC
GO: Biological Process	GO:0046645	positive regulation of gamma-delta T cell activation			1.559e-05	0.09779	0.0001343	0.001252	4	8	LILRB1,NOD2,PTPRC,NCKAP1L
GO: Biological Process	GO:0002765	immune response-inhibiting signal transduction			1.559e-05	0.09779	0.0001343	0.001252	4	8	LILRB2,LILRB1,CD33,LYN
GO: Biological Process	GO:1900274	regulation of phospholipase C activity			1.597e-05	0.1002	0.0001374	0.001281	13	141	PDGFRA,HRH1,PLEK,GPR65,FPR1,FPR3,CXCR2,PTAFR,ITK,C3AR1,GNA15,C5AR1,EDNRA
GO: Biological Process	GO:0043200	response to amino acid			1.618e-05	0.1015	0.000139	0.001296	12	121	CEBPB,PDGFRA,MMP2,COL1A1,COL1A2,COL3A1,COL5A2,COL16A1,ICAM1,SLC1A3,CYBB,LYN
GO: Biological Process	GO:2000351	regulation of endothelial cell apoptotic process			1.643e-05	0.1031	0.000141	0.001314	9	67	CCL2,ICAM1,RGCC,IL10,ITGA4,SCG2,THBS1,SERPINE1,TNFAIP3
GO: Biological Process	GO:0019229	regulation of vasoconstriction			1.666e-05	0.1045	0.0001427	0.00133	10	84	AHR,HRH1,MMP2,ALOX5,ICAM1,PTAFR,PTGS2,TBXAS1,LEP,CD38
GO: Biological Process	GO:0032743	positive regulation of interleukin-2 production			1.757e-05	0.1102	0.0001501	0.001399	7	38	CLEC7A,CCR2,ANXA1,RIPK2,PTPRC,CD28,CD86
GO: Biological Process	GO:0042554	superoxide anion generation			1.757e-05	0.1102	0.0001501	0.001399	7	38	ACP5,CLEC7A,TYROBP,CYBB,NCF2,ITGAM,ITGB2
GO: Biological Process	GO:0032753	positive regulation of interleukin-4 production			1.821e-05	0.1142	0.0001554	0.001448	6	26	CEBPB,FCER1G,IL33,NLRP3,CD28,CD86
GO: Biological Process	GO:0045860	positive regulation of protein kinase activity			1.83e-05	0.1148	0.000156	0.001454	31	611	EREG,CD300A,CHI3L1,ADCY7,ADORA2B,S100A12,PIK3CG,CCL5,GPNMB,MAP3K8,FPR1,RGCC,IGF1,CCN1,IL1RN,RASSF2,RIPK2,ZEB2,NOD2,STK4,PTPRC,C5AR1,RAP2B,LCP2,LEP,EDNRA,THBS1,TLR1,TLR4,GREM1,NCKAP1L
GO: Biological Process	GO:0042326	negative regulation of phosphorylation			1.855e-05	0.1164	0.0001579	0.001471	28	524	CD300A,CORO1C,FABP4,TWIST1,FBLN1,SFRP4,GMFG,APOE,IGF1,PYCARD,IL6,INHBA,RASSF2,PTPN22,SAMSN1,PTPRC,TIGAR,NIBAN1,SH2B3,NUPR1,EMILIN1,RGS2,TLR4,IRAK3,DUSP10,TNFAIP3,GREM1,LYN
GO: Biological Process	GO:2000401	regulation of lymphocyte migration			1.857e-05	0.1165	0.0001579	0.001471	9	68	CCR2,AIF1,CCL2,CCL4,CCL5,CCL7,CCL20,PYCARD,ITGA4
GO: Biological Process	GO:0010935	regulation of macrophage cytokine production			1.876e-05	0.1176	0.000159	0.001482	5	16	LILRB1,CD36,TLR2,TLR4,IRAK3
GO: Biological Process	GO:0010885	regulation of cholesterol storage			1.876e-05	0.1176	0.000159	0.001482	5	16	ABCA1,PPARG,MSR1,ABCG1,CD36
GO: Biological Process	GO:0010632	regulation of epithelial cell migration			1.904e-05	0.1194	0.0001612	0.001502	20	307	CORO1C,SERPINF1,HMOX1,ADORA2B,FGF7,MMP9,ANXA1,RGCC,APOE,PPARG,IGF1,LGMN,DCN,PTGS2,NRP2,SRPX2,GRN,THBS1,SERPINE1,DUSP10
GO: Biological Process	GO:0071229	cellular response to acid chemical			1.909e-05	0.1197	0.0001614	0.001504	17	233	ABCA1,CEBPB,PDGFRA,SERPINF1,MMP2,COL1A1,COL1A2,COL3A1,COL5A2,COL16A1,FOLR2,PPARG,CYBB,PTAFR,PTGDR,LEP,LYN
GO: Biological Process	GO:0060193	positive regulation of lipase activity			1.958e-05	0.1228	0.0001653	0.001541	14	165	PDGFRA,HRH1,CCL5,GPR65,FPR1,FPR3,CCN1,CXCR2,PTAFR,ITK,C3AR1,GNA15,C5AR1,EDNRA
GO: Biological Process	GO:0001935	endothelial cell proliferation			1.965e-05	0.1232	0.0001656	0.001544	16	210	HMOX1,ADORA2B,CCL2,CCL11,RGCC,APOE,PPARG,IGF1,IL10,ITGA4,NRP2,SULF1,SCG2,LEP,THBS1,EGR3
GO: Biological Process	GO:0051896	regulation of protein kinase B signaling			1.999e-05	0.1254	0.0001683	0.001568	18	258	EREG,PDGFRA,CHI3L1,PIK3CG,FGF7,VAV1,AREG,IGF1,IL6,HPSE,TRAT1,RAC2,SH2B3,LEP,THBS1,CD28,CD86,HCLS1
GO: Biological Process	GO:1903038	negative regulation of leukocyte cell-cell adhesion			2.002e-05	0.1255	0.0001683	0.001569	13	144	CEBPB,LILRB2,CD300A,VSIG4,FCGR2B,GPNMB,ANXA1,IL10,PTPN22,LILRB1,LGALS3,CD86,CD44
GO: Biological Process	GO:0032633	interleukin-4 production			2.101e-05	0.1318	0.0001764	0.001644	7	39	CEBPB,FCER1G,ITK,IL33,NLRP3,CD28,CD86
GO: Biological Process	GO:0030301	cholesterol transport			2.17e-05	0.1361	0.0001819	0.001696	11	105	ABCA1,CES1,PLTP,APOC1,APOE,MSR1,ABCG1,SOAT1,NPC1,LEP,CD36
GO: Biological Process	GO:0008585	female gonad development			2.249e-05	0.1411	0.0001883	0.001755	12	125	EREG,CEBPB,PDGFRA,AHR,FGF7,MMP2,ICAM1,INHBA,NUPR1,LEP,ZFPM2,SERPINE1
GO: Biological Process	GO:1905523	positive regulation of macrophage migration			2.298e-05	0.1441	0.0001916	0.001786	6	27	CCL2,CCL5,C3AR1,C5AR1,THBS1,TREM2
GO: Biological Process	GO:0002438	acute inflammatory response to antigenic stimulus			2.298e-05	0.1441	0.0001916	0.001786	6	27	FCER1G,FCGR2B,ICAM1,CXCR2,BTK,C3
GO: Biological Process	GO:0045624	positive regulation of T-helper cell differentiation			2.298e-05	0.1441	0.0001916	0.001786	6	27	CCR2,ANXA1,IL6,RIPK2,NLRP3,CD86
GO: Biological Process	GO:0002820	negative regulation of adaptive immune response			2.345e-05	0.1471	0.0001952	0.00182	8	54	FCGR2B,CR1,IL7R,SAMSN1,LILRB1,NOD2,PTPRC,IL33
GO: Biological Process	GO:0010950	positive regulation of endopeptidase activity			2.347e-05	0.1472	0.0001952	0.00182	15	190	CLEC7A,S100A8,S100A9,AIM2,PPARG,CR1,FAS,CCN1,PYCARD,CTSD,LGMN,RIPK2,CASP1,NLRP3,LYN
GO: Biological Process	GO:0010810	regulation of cell-substrate adhesion			2.376e-05	0.149	0.0001974	0.00184	17	237	CORO1C,FBLN1,MMP12,COL1A1,COL8A1,COL16A1,FN1,MMRN1,POSTN,CCN1,RAC2,EMILIN1,LGALS1,THBS1,CD36,SERPINE1,GREM1
GO: Biological Process	GO:0043367	CD4-positive, alpha-beta T cell differentiation			2.517e-05	0.1579	0.0002088	0.001946	10	88	CCR2,CCL20,ANXA1,RSAD2,IL6,RIPK2,GPR183,NLRP3,CD86,NCKAP1L
GO: Biological Process	GO:0006957	complement activation, alternative pathway			2.609e-05	0.1636	0.0002162	0.002015	5	17	CFH,VSIG4,CR1,CFD,C3
GO: Biological Process	GO:1904062	regulation of cation transmembrane transport			2.672e-05	0.1676	0.0002208	0.002058	23	394	TCIRG1,TWIST1,CCR2,KCNE4,CLIC2,PIK3CG,CXCL9,AHR,CCL2,MMP9,PLN,ALOX5,SLC31A2,CTSS,MYO5A,FXYD5,PTPN22,GEM,RGS2,EDNRA,CORO1A,TREM2,LYN
GO: Biological Process	GO:0071496	cellular response to external stimulus			2.672e-05	0.1676	0.0002208	0.002058	22	367	TLR7,HMOX1,ADORA2B,AIF1,UPP1,MMP9,COL1A1,FOLR2,ICAM1,PPARG,FAS,POSTN,PIEZO2,CYBB,ITGA4,PTGS2,PTPRC,CASP1,LEP,EDNRA,TLR4,LYN
GO: Biological Process	GO:0046638	positive regulation of alpha-beta T cell differentiation			2.691e-05	0.1688	0.0002221	0.00207	8	55	ADA,CCR2,ANXA1,IL6,RIPK2,NLRP3,CD86,NCKAP1L
GO: Biological Process	GO:0044706	multi-multicellular organism process			2.715e-05	0.1703	0.0002238	0.002086	18	264	ADCY7,FBLN1,MAFF,MMP2,MMP9,MMP12,COL16A1,ARHGDIB,PTAFR,PTGIS,PTGS2,EPYC,GRN,RGS2,LEP,THBD,TIMP1,CD38
GO: Biological Process	GO:2000501	regulation of natural killer cell chemotaxis			2.757e-05	0.1729	0.0002269	0.002115	4	9	CCL2,CCL4,CCL5,CCL7
GO: Biological Process	GO:0010507	negative regulation of autophagy			2.78e-05	0.1744	0.0002282	0.002127	10	89	HMOX1,IL10,IL10RA,PTPN22,NPC1,TIGAR,NUPR1,LEP,TREM2,TNFAIP3
GO: Biological Process	GO:0070227	lymphocyte apoptotic process			2.78e-05	0.1744	0.0002282	0.002127	10	89	ADA,CLC,CCL5,FAS,IL7R,IL10,BTK,LGALS3,CD44,LYN
GO: Biological Process	GO:1901216	positive regulation of neuron death			2.853e-05	0.179	0.0002335	0.002176	12	128	TYROBP,FCGR2B,FAS,CTSZ,NCF2,ITGAM,ITGB2,KCNMA1,C1QA,GRN,NUPR1,TLR4
GO: Biological Process	GO:0006939	smooth muscle contraction			2.853e-05	0.179	0.0002335	0.002176	12	128	ACTA2,ADA,ADORA2B,CNN1,COMP,PTAFR,PTGS2,SULF1,KCNMA1,RGS2,EDNRA,CD38
GO: Biological Process	GO:0044089	positive regulation of cellular component biogenesis			2.855e-05	0.1791	0.0002335	0.002176	29	566	ABCA1,CLEC7A,AHR,CCL11,MMP1,PLEK,AIM2,COL16A1,GPR65,ICAM1,RGCC,GMFG,FAS,PYCARD,JCHAIN,SRPX2,NAV3,RAC2,DPYSL3,CAPG,LCP1,EMILIN1,ARPC1B,CORO1A,THBS2,CD36,TLR4,HCK,NCKAP1L
GO: Biological Process	GO:0030728	ovulation			2.87e-05	0.18	0.0002344	0.002185	6	28	EREG,INHBA,PTGS2,RGS2,LEP,TNFAIP6
GO: Biological Process	GO:0048871	multicellular organismal homeostasis			2.877e-05	0.1805	0.0002347	0.002187	28	537	CEBPB,ACP5,TCIRG1,ADCY7,PLAC8,FABP4,FABP5,CCR2,UCP2,FGF7,COL14A1,CCL5,JCHAIN,IGKC,IL1RN,CTSS,IL6,PTGS2,NOD2,RAC2,LEP,CORO1A,LIPA,CD36,CD38,TLR4,TNFAIP3,LYZ
GO: Biological Process	GO:0032735	positive regulation of interleukin-12 production			2.956e-05	0.1854	0.0002404	0.002241	7	41	CLEC7A,IRF8,RIPK2,NOD2,CD36,TLR2,TLR4
GO: Biological Process	GO:0038083	peptidyl-tyrosine autophosphorylation			2.956e-05	0.1854	0.0002404	0.002241	7	41	FGR,SLA,ITK,BTK,GREM1,LYN,HCK
GO: Biological Process	GO:0072577	endothelial cell apoptotic process			2.967e-05	0.1861	0.000241	0.002247	9	72	CCL2,ICAM1,RGCC,IL10,ITGA4,SCG2,THBS1,SERPINE1,TNFAIP3
GO: Biological Process	GO:0007187	G protein-coupled receptor signaling pathway, coupled to cyclic nucleotide second messenger			3.001e-05	0.1882	0.0002435	0.002269	18	266	ABCA1,ADGRE2,ADCY7,ADORA2B,CXCL9,HRH1,CCL2,CCR1,PLN,GPR65,ANXA1,FPR1,MARCO,PTGDR,GNA15,RGS1,RGS2,EDNRA
GO: Biological Process	GO:0030195	negative regulation of blood coagulation			3.08e-05	0.1932	0.0002496	0.002326	8	56	PDGFRA,FAP,PLAUR,APOE,SH2B3,THBD,THBS1,SERPINE1
GO: Biological Process	GO:0031532	actin cytoskeleton reorganization			3.087e-05	0.1936	0.0002498	0.002329	11	109	PDGFRA,S100A9,FGF7,PLEK,GPR65,ANXA1,GMFG,ARHGDIB,PHACTR1,HCK,HCLS1
GO: Biological Process	GO:0038093	Fc receptor signaling pathway			3.101e-05	0.1945	0.0002506	0.002336	17	242	FCER1G,FCGR1B,FCGR2A,FCGR2B,FGR,VAV1,LAT2,IGKC,IGLC1,ITK,PTPRC,BTK,LCP2,ARPC1B,LYN,HCK,NCKAP1L
GO: Biological Process	GO:0043405	regulation of MAP kinase activity			3.279e-05	0.2056	0.0002647	0.002467	22	372	CD300A,ADORA2B,S100A12,PIK3CG,MAP3K8,FPR1,APOE,IGF1,IL1RN,RIPK2,PTPN22,ZEB2,NOD2,PTPRC,C5AR1,SH2B3,RGS2,THBS1,TLR4,IRAK3,DUSP10,LYN
GO: Biological Process	GO:2000514	regulation of CD4-positive, alpha-beta T cell activation			3.318e-05	0.2081	0.0002675	0.002494	9	73	CCR2,CCL20,ANXA1,IL6,RIPK2,NLRP3,CD86,CD44,NCKAP1L
GO: Biological Process	GO:1901222	regulation of NIK/NF-kappaB signaling			3.331e-05	0.2089	0.0002682	0.0025	12	130	TLR7,CHI3L1,RASSF2,PTPN22,NOD2,NLRP3,CD14,TLR1,TLR2,TLR4,TREM2,GREM1
GO: Biological Process	GO:0034109	homotypic cell-cell adhesion			3.378e-05	0.2119	0.0002716	0.002532	10	91	PDGFRA,ACTN1,PIK3CG,CCL5,PLEK,COMP,RAP2B,SH2B3,LGALS1,LYN
GO: Biological Process	GO:0022411	cellular component disassembly			3.46e-05	0.217	0.0002778	0.00259	32	662	HMOX1,FAP,MMP1,MMP2,PLEK,MMP9,MMP12,RUBCNL,APOC1,APOE,MSR1,CTSL,CTSS,IL6,SOAT1,ITGAM,NAV3,C1QA,C1QB,C3,NPC1,TIGAR,CAPG,LCP1,MCOLN1,LIPA,TIMP1,TIMP2,CD36,CD44,TREM2,IRAK3
GO: Biological Process	GO:0007565	female pregnancy			3.474e-05	0.2179	0.0002786	0.002597	16	220	ADCY7,FBLN1,MMP2,MMP9,MMP12,COL16A1,ARHGDIB,PTGIS,PTGS2,EPYC,GRN,RGS2,LEP,THBD,TIMP1,CD38
GO: Biological Process	GO:2000516	positive regulation of CD4-positive, alpha-beta T cell activation			3.48e-05	0.2182	0.0002787	0.002598	7	42	CCR2,ANXA1,IL6,RIPK2,NLRP3,CD86,NCKAP1L
GO: Biological Process	GO:1904036	negative regulation of epithelial cell apoptotic process			3.514e-05	0.2204	0.0002811	0.00262	8	57	HMOX1,ICAM1,IGF1,IL10,SCG2,NUPR1,SERPINE1,TNFAIP3
GO: Biological Process	GO:0010934	macrophage cytokine production			3.547e-05	0.2225	0.0002829	0.002637	5	18	LILRB1,CD36,TLR2,TLR4,IRAK3
GO: Biological Process	GO:0050871	positive regulation of B cell activation			3.55e-05	0.2227	0.0002829	0.002637	13	152	ADA,IGKC,IGLC1,IL6,NOD2,PTPRC,BTK,GPR183,CD28,CD38,TLR4,TRBC1,NCKAP1L
GO: Biological Process	GO:0002455	humoral immune response mediated by circulating immunoglobulin			3.55e-05	0.2227	0.0002829	0.002637	13	152	HLA-DQB1,FCGR2B,CR1,IGKC,IGLC1,NOD2,PTPRC,C1QA,C1QB,C1R,C1S,C3,TRBC1
GO: Biological Process	GO:0046677	response to antibiotic			3.7e-05	0.2321	0.0002945	0.002745	22	375	HMOX1,ADA,ADCY7,S100A8,AHR,CCL7,MMP2,COL1A1,ANXA1,ICAM1,SLC1A3,AREG,IGF1,IL6,CYBB,IL10,RGS2,LEP,CD14,TLR4,TNFAIP3,CYB5R4
GO: Biological Process	GO:0006508	proteolysis			3.768e-05	0.2363	0.0002995	0.002792	69	1915	CES1,SERPINF1,CLEC7A,S100A8,S100A9,FAP,FBLN1,CLC,SPON1,PLAUR,MMP1,MMP2,MMP9,MMP12,AIM2,COL6A3,COMP,FN1,BAG2,CPA3,APOE,PPARG,CR1,FAS,IGF1,CCN1,SRGN,PYCARD,LAMP3,CSTA,CSTB,CTSD,CTSL,CTSS,IL6,CTSZ,IL10,LGMN,RNF130,NAIP,RIPK2,PTGS2,CFD,ADAMDEC1,ERAP2,DPEP2,C1R,C1S,C3,IL33,RARRES1,CASP1,GRN,ADAM12,NUPR1,OLR1,NLRP3,THBS1,TIMP1,TIMP2,GZMB,GZMK,SERPINE1,CD44,TREM2,TNFAIP3,TNFRSF1B,LYN,PCOLCE
GO: Biological Process	GO:0043370	regulation of CD4-positive, alpha-beta T cell differentiation			3.998e-05	0.2508	0.0003174	0.002959	8	58	CCR2,CCL20,ANXA1,IL6,RIPK2,NLRP3,CD86,NCKAP1L
GO: Biological Process	GO:0046633	alpha-beta T cell proliferation			4.077e-05	0.2557	0.0003233	0.003014	7	43	CCR2,RIPK2,PTPN22,PTPRC,DOCK2,CD28,CD44
GO: Biological Process	GO:0014068	positive regulation of phosphatidylinositol 3-kinase signaling			4.083e-05	0.2561	0.0003233	0.003014	10	93	PDGFRA,PIK3CG,CCL5,FGR,IGF1,DCN,LEP,CD28,LYN,HCLS1
GO: Biological Process	GO:0015850	organic hydroxy compound transport			4.111e-05	0.2579	0.0003252	0.003031	19	298	ABCA1,CES1,SLCO2B1,CD300A,ADORA2B,FCER1G,PLTP,APOC1,APOE,PPARG,AQP9,MSR1,ABCG1,SOAT1,LILRB1,NPC1,LEP,LGALS3,CD36
GO: Biological Process	GO:0071230	cellular response to amino acid stimulus			4.128e-05	0.2589	0.0003261	0.00304	9	75	CEBPB,PDGFRA,MMP2,COL1A1,COL1A2,COL3A1,COL5A2,COL16A1,CYBB
GO: Biological Process	GO:1902565	positive regulation of neutrophil activation			4.268e-05	0.2677	0.0003326	0.0031	3	4	PTAFR,ITGAM,ITGB2
GO: Biological Process	GO:0001810	regulation of type I hypersensitivity			4.268e-05	0.2677	0.0003326	0.0031	3	4	FCER1G,FCGR2B,BTK
GO: Biological Process	GO:0016068	type I hypersensitivity			4.268e-05	0.2677	0.0003326	0.0031	3	4	FCER1G,FCGR2B,BTK
GO: Biological Process	GO:0043315	positive regulation of neutrophil degranulation			4.268e-05	0.2677	0.0003326	0.0031	3	4	PTAFR,ITGAM,ITGB2
GO: Biological Process	GO:2001201	regulation of transforming growth factor-beta secretion			4.268e-05	0.2677	0.0003326	0.0031	3	4	FBLN1,FN1,LILRB1
GO: Biological Process	GO:0071726	cellular response to diacyl bacterial lipopeptide			4.268e-05	0.2677	0.0003326	0.0031	3	4	CD14,CD36,TLR2
GO: Biological Process	GO:0071724	response to diacyl bacterial lipopeptide			4.268e-05	0.2677	0.0003326	0.0031	3	4	CD14,CD36,TLR2
GO: Biological Process	GO:0038124	toll-like receptor TLR6:TLR2 signaling pathway			4.268e-05	0.2677	0.0003326	0.0031	3	4	CD14,CD36,TLR2
GO: Biological Process	GO:0032497	detection of lipopolysaccharide			4.268e-05	0.2677	0.0003326	0.0031	3	4	LY96,TLR4,TREM2
GO: Biological Process	GO:0002434	immune complex clearance			4.268e-05	0.2677	0.0003326	0.0031	3	4	CCR2,FCGR2B,CCL2
GO: Biological Process	GO:0002538	arachidonic acid metabolite production involved in inflammatory response			4.268e-05	0.2677	0.0003326	0.0031	3	4	ALOX5,ALOX5AP,SERPINE1
GO: Biological Process	GO:0007186	G protein-coupled receptor signaling pathway			4.354e-05	0.2731	0.0003382	0.003152	54	1392	ABCA1,EREG,ADGRE2,ADA,ADCY7,CCR2,ADORA2B,ADORA3,FCN1,PIK3CG,CXCL9,HRH1,CCL2,CCR1,CCL4,CCL5,CCL7,CCR5,CCL8,CCL11,GPR171,CCL18,CCL20,PLEK,PLN,VAV1,GPR65,ANXA1,FPR1,FPR3,APOE,PPARG,PPBP,AREG,MARCO,CXCL8,CXCR2,PTAFR,PTGDR,ACKR3,BTK,C3,P2RY14,C3AR1,GNA15,C5AR1,RAC2,CCRL2,GPR183,CXCL2,CXCL3,RGS1,RGS2,EDNRA
GO: Biological Process	GO:0050858	negative regulation of antigen receptor-mediated signaling pathway			4.357e-05	0.2732	0.0003382	0.003152	6	30	CD300A,FCGR2B,LPXN,PTPN22,LILRB4,LGALS3
GO: Biological Process	GO:0043302	positive regulation of leukocyte degranulation			4.357e-05	0.2732	0.0003382	0.003152	6	30	ADORA2B,FCER1G,FGR,PTAFR,ITGAM,ITGB2
GO: Biological Process	GO:0032661	regulation of interleukin-18 production			4.515e-05	0.2832	0.0003496	0.003259	4	10	IL10,NOD2,CD84,TLR2
GO: Biological Process	GO:0002246	wound healing involved in inflammatory response			4.515e-05	0.2832	0.0003496	0.003259	4	10	HMOX1,CCR2,TIMP1,CD44
GO: Biological Process	GO:0050798	activated T cell proliferation			4.536e-05	0.2845	0.0003504	0.003266	8	59	CLC,IGF1,PYCARD,ITGAM,ITGAX,ITGB2,CD86,CRTAM
GO: Biological Process	GO:0030850	prostate gland development			4.536e-05	0.2845	0.0003504	0.003266	8	59	SERPINF1,AHR,PLAUR,MMP2,ANXA1,IGF1,SULF1,CD44
GO: Biological Process	GO:0034762	regulation of transmembrane transport			4.546e-05	0.2851	0.0003507	0.003269	31	641	TCIRG1,FABP5,TWIST1,CCR2,KCNE4,CLIC2,PIK3CG,CXCL9,AHR,CCL2,MMP9,PLN,ALOX5,SLC31A2,IGF1,CTSS,CYBB,MYO5A,FXYD5,PTPN22,PTAFR,GEM,KCNMA1,C3,RGS2,LEP,EDNRA,CORO1A,THBS1,TREM2,LYN
GO: Biological Process	GO:2001236	regulation of extrinsic apoptotic signaling pathway			4.551e-05	0.2855	0.0003507	0.003269	14	178	HMOX1,SRPX,ICAM1,FAS,IGF1,PYCARD,INHBA,STK4,PTPRC,SCG2,LGALS3,THBS1,SERPINE1,TNFAIP3
GO: Biological Process	GO:0045596	negative regulation of cell differentiation			4.585e-05	0.2876	0.0003529	0.003289	38	860	ABCA1,EREG,CORO1C,TWIST1,FBLN1,FBN1,FCGR2B,AHR,CCL11,GPR171,MMP9,COL3A1,COL5A1,COL5A2,ANXA1,APOE,PPARG,FAS,AREG,POSTN,ABCG1,IGF1,IL6,CTSZ,INHBA,LILRB1,CCN4,LILRB4,DPYSL3,RGS2,LGALS1,ZFPM2,CD38,TLR4,CD44,DUSP10,GREM1,LYN
GO: Biological Process	GO:0150079	negative regulation of neuroinflammatory response			4.726e-05	0.2964	0.0003619	0.003374	5	19	PPARG,IGF1,PTPRC,GRN,TNFRSF1B
GO: Biological Process	GO:1904996	positive regulation of leukocyte adhesion to vascular endothelial cell			4.726e-05	0.2964	0.0003619	0.003374	5	19	CCR2,ICAM1,ITGA4,PTAFR,ITGB2
GO: Biological Process	GO:0010888	negative regulation of lipid storage			4.726e-05	0.2964	0.0003619	0.003374	5	19	ABCA1,PPARG,ABCG1,IL6,LEP
GO: Biological Process	GO:0043031	negative regulation of macrophage activation			4.726e-05	0.2964	0.0003619	0.003374	5	19	VSIG4,FCGR2B,PPARG,PTPRC,GRN
GO: Biological Process	GO:0045622	regulation of T-helper cell differentiation			4.757e-05	0.2984	0.0003639	0.003392	7	44	CCR2,CCL20,ANXA1,IL6,RIPK2,NLRP3,CD86
GO: Biological Process	GO:0007169	transmembrane receptor protein tyrosine kinase signaling pathway			4.848e-05	0.3041	0.0003704	0.003452	35	767	EREG,PDGFRA,TCIRG1,CCL2,FGF7,PLAUR,MMP2,FGR,MERTK,MMP9,VAV1,COL1A1,AREG,IGF1,CYBB,LGMN,RASSF2,NCF2,NCF4,DCN,NRP2,PTPRE,TRAT1,SULF1,SH2B3,LCP2,EMILIN1,ARPC1B,LEP,THBS1,LOX,GREM1,LYN,HCK,NCKAP1L
GO: Biological Process	GO:0097191	extrinsic apoptotic signaling pathway			4.912e-05	0.3081	0.0003748	0.003493	17	251	HMOX1,SRPX,ICAM1,FAS,IGF1,PYCARD,INHBA,BCL2A1,STK4,PTPRC,SCG2,IL33,LGALS3,THBS1,SERPINE1,TNFAIP3,TNFRSF1B
GO: Biological Process	GO:0061138	morphogenesis of a branching epithelium			5.068e-05	0.3178	0.0003862	0.0036	16	227	PDGFRA,MGP,AHR,FGF7,CCL11,AREG,IGF1,CTSD,IL6,CTSZ,IL10,STK4,SULF1,EDNRA,CD44,GREM1
GO: Biological Process	GO:0097755	positive regulation of blood vessel diameter			5.1e-05	0.3199	0.0003877	0.003614	9	77	HMOX1,ADORA2B,AHR,MMP2,APOE,PTAFR,KCNMA1,RGS2,LEP
GO: Biological Process	GO:0046637	regulation of alpha-beta T cell differentiation			5.1e-05	0.3199	0.0003877	0.003614	9	77	ADA,CCR2,CCL20,ANXA1,IL6,RIPK2,NLRP3,CD86,NCKAP1L
GO: Biological Process	GO:0050819	negative regulation of coagulation			5.134e-05	0.322	0.0003896	0.003632	8	60	PDGFRA,FAP,PLAUR,APOE,SH2B3,THBD,THBS1,SERPINE1
GO: Biological Process	GO:0031960	response to corticosteroid			5.143e-05	0.3226	0.0003896	0.003632	14	180	SERPINF1,AIF1,COL1A1,ANXA1,ICAM1,FAS,AREG,IL1RN,IL6,CYBB,IL10,PTAFR,PTGS2,KCNMA1
GO: Biological Process	GO:0002262	myeloid cell homeostasis			5.143e-05	0.3226	0.0003896	0.003632	14	180	HMOX1,CCR2,FCER1G,CCL2,MERTK,ANXA1,IL6,CXCR2,INHBA,SH2B3,CD44,LYN,HCLS1,NCKAP1L
GO: Biological Process	GO:0032673	regulation of interleukin-4 production			5.302e-05	0.3325	0.0004006	0.003734	6	31	CEBPB,FCER1G,IL33,NLRP3,CD28,CD86
GO: Biological Process	GO:0032647	regulation of interferon-alpha production			5.302e-05	0.3325	0.0004006	0.003734	6	31	TLR7,MMP12,IL10,RIPK2,PTPN22,TLR4
GO: Biological Process	GO:0001959	regulation of cytokine-mediated signaling pathway			5.464e-05	0.3427	0.0004124	0.003844	14	181	CCL5,MMP12,SAMHD1,PPARG,PYCARD,IL1RN,IL6,RIPK2,PTPRC,SH2B3,CASP1,TREM2,IRAK3,TNFAIP3
GO: Biological Process	GO:0048144	fibroblast proliferation			5.505e-05	0.3453	0.000415	0.003868	11	116	EREG,PDGFRA,CD300A,FBLN1,MMP9,FN1,PPARG,IGF1,NUPR1,EDNRA,SERPINE1
GO: Biological Process	GO:0010863	positive regulation of phospholipase C activity			5.589e-05	0.3505	0.0004208	0.003922	12	137	PDGFRA,HRH1,GPR65,FPR1,FPR3,CXCR2,PTAFR,ITK,C3AR1,GNA15,C5AR1,EDNRA
GO: Biological Process	GO:0006027	glycosaminoglycan catabolic process			5.796e-05	0.3635	0.0004359	0.004063	8	61	VCAN,SDC3,FUCA1,DCN,HPSE,OGN,CD44,LUM
GO: Biological Process	GO:0032269	negative regulation of cellular protein metabolic process			5.932e-05	0.3721	0.0004456	0.004153	48	1202	CD300A,CORO1C,SERPINF1,FABP4,TWIST1,FBLN1,PLAUR,MMP9,COL6A3,SFRP4,BAG2,GMFG,APOE,CR1,IGF1,PYCARD,LAMP3,CSTA,CSTB,IL6,CTSZ,PHACTR1,IL10,RASSF2,NAIP,PTPN22,SAMSN1,PTGS2,PTPRC,C3,NIBAN1,RARRES1,SH2B3,EMILIN1,RGS2,LGALS3,THBS1,TIMP1,TIMP2,TLR4,SERPINE1,CD44,IRAK3,DUSP10,TNFAIP3,GREM1,LYN,NCKAP1L
GO: Biological Process	GO:0001960	negative regulation of cytokine-mediated signaling pathway			6.257e-05	0.3924	0.0004689	0.00437	9	79	CCL5,MMP12,SAMHD1,PPARG,IL1RN,IL6,PTPRC,SH2B3,IRAK3
GO: Biological Process	GO:0002292	T cell differentiation involved in immune response			6.257e-05	0.3924	0.0004689	0.00437	9	79	CCR2,FCER1G,CCL20,ANXA1,IL6,RIPK2,GPR183,NLRP3,CD86
GO: Biological Process	GO:0002377	immunoglobulin production			6.324e-05	0.3966	0.0004733	0.004412	15	207	HLA-DQB1,TCIRG1,FCGR2B,SAMHD1,FAS,IGKC,IL6,IL7R,IL10,NOD2,PTPRC,BTK,IL33,CD28,TNFAIP3
GO: Biological Process	GO:0048246	macrophage chemotaxis			6.396e-05	0.4011	0.000477	0.004446	7	46	CCL2,CCL5,SLAMF8,C3AR1,C5AR1,LGALS3,THBS1
GO: Biological Process	GO:0032692	negative regulation of interleukin-1 production			6.396e-05	0.4011	0.000477	0.004446	7	46	ACP5,IGF1,IL10,NLRP3,CD33,TREM2,TNFAIP3
GO: Biological Process	GO:0002369	T cell cytokine production			6.396e-05	0.4011	0.000477	0.004446	7	46	CCR2,CLC,CCL20,RSAD2,IL6,NLRP3,TNFRSF1B
GO: Biological Process	GO:0010758	regulation of macrophage chemotaxis			6.404e-05	0.4016	0.000477	0.004446	6	32	CCL2,CCL5,SLAMF8,C3AR1,C5AR1,THBS1
GO: Biological Process	GO:2001056	positive regulation of cysteine-type endopeptidase activity			6.458e-05	0.405	0.0004805	0.004479	13	161	CLEC7A,S100A8,S100A9,AIM2,PPARG,FAS,CCN1,PYCARD,CTSD,LGMN,RIPK2,CASP1,NLRP3
GO: Biological Process	GO:1902041	regulation of extrinsic apoptotic signaling pathway via death domain receptors			6.527e-05	0.4094	0.0004851	0.004521	8	62	HMOX1,ICAM1,FAS,STK4,LGALS3,THBS1,SERPINE1,TNFAIP3
GO: Biological Process	GO:0032908	regulation of transforming growth factor beta1 production			6.97e-05	0.4372	0.0005155	0.004805	4	11	TYROBP,GATA6,THBS1,LUM
GO: Biological Process	GO:0001781	neutrophil apoptotic process			6.97e-05	0.4372	0.0005155	0.004805	4	11	ANXA1,IL6,CXCR2,CD44
GO: Biological Process	GO:0002883	regulation of hypersensitivity			6.97e-05	0.4372	0.0005155	0.004805	4	11	FCER1G,FCGR2B,BTK,C3
GO: Biological Process	GO:0060907	positive regulation of macrophage cytokine production			6.97e-05	0.4372	0.0005155	0.004805	4	11	LILRB1,CD36,TLR2,TLR4
GO: Biological Process	GO:0044403	symbiotic process			7.179e-05	0.4503	0.0005303	0.004943	39	911	CFH,PDGFRA,CLEC5A,HLA-DRA,CCR2,FBLN1,FCGR2B,FCN1,MICB,CCL2,CCL4,CCL5,CCR5,CCL8,MMP1,EEA1,MMP9,MRC1,FN1,PILRA,ICAM1,APOE,CR1,RSAD2,LAMP3,CXCL8,LRRC15,NRP2,ACKR3,C1QA,NPC1,DOCK2,LGALS1,CD28,CD86,TLR2,TREM1,LYN,HCK
GO: Biological Process	GO:0001933	negative regulation of protein phosphorylation			7.316e-05	0.4589	0.0005399	0.005032	25	478	CD300A,CORO1C,FABP4,TWIST1,FBLN1,SFRP4,GMFG,APOE,IGF1,PYCARD,IL6,RASSF2,PTPN22,SAMSN1,PTPRC,NIBAN1,SH2B3,EMILIN1,RGS2,TLR4,IRAK3,DUSP10,TNFAIP3,GREM1,LYN
GO: Biological Process	GO:0061756	leukocyte adhesion to vascular endothelial cell			7.373e-05	0.4624	0.0005434	0.005065	7	47	CCR2,SELL,ICAM1,ITGA4,PTAFR,ITGB2,LEP
GO: Biological Process	GO:1901215	negative regulation of neuron death			7.601e-05	0.4767	0.0005596	0.005216	17	260	CEBPB,SERPINF1,HMOX1,CCL2,CCL5,GPNMB,APOE,IGF1,IL6,IL10,LGMN,NAIP,C5AR1,TIGAR,GRN,CORO1A,TNFRSF1B
GO: Biological Process	GO:0051926	negative regulation of calcium ion transport			7.628e-05	0.4784	0.0005602	0.005222	9	81	LILRB2,CLIC2,AHR,PLN,ICAM1,LILRB1,GEM,PTGS2,CD33
GO: Biological Process	GO:0061045	negative regulation of wound healing			7.628e-05	0.4784	0.0005602	0.005222	9	81	PDGFRA,FAP,PLAUR,APOE,SH2B3,THBD,THBS1,SERPINE1,DUSP10
GO: Biological Process	GO:0032607	interferon-alpha production			7.681e-05	0.4818	0.0005635	0.005252	6	33	TLR7,MMP12,IL10,RIPK2,PTPN22,TLR4
GO: Biological Process	GO:0006812	cation transport			7.781e-05	0.488	0.0005701	0.005314	54	1423	LILRB2,CD300A,TCIRG1,SLC15A3,ADA,TWIST1,CCR2,KCNE4,FCER1G,CLIC2,PIK3CG,UCP2,CXCL9,AHR,HRH1,CCL2,CCR1,CCL4,CCL5,CCR5,CCL8,MMP9,PLN,ALOX5,STEAP1,SLC31A2,ICAM1,SLC1A3,IGF1,PIEZO2,CTSS,MYO5A,FXYD5,PTPN22,LILRB1,GEM,PTGS2,CD84,PTPRC,BTK,KCNMA1,MCUB,NUPR1,MCOLN1,RGS2,LEP,EDNRA,LGALS3,CORO1A,CD33,SERPINE1,TREM2,LYN,SLC38A6
GO: Biological Process	GO:0034765	regulation of ion transmembrane transport			7.862e-05	0.4931	0.0005754	0.005363	27	539	TCIRG1,TWIST1,CCR2,KCNE4,CLIC2,PIK3CG,CXCL9,AHR,CCL2,MMP9,PLN,ALOX5,SLC31A2,CTSS,CYBB,MYO5A,FXYD5,PTPN22,PTAFR,GEM,KCNMA1,RGS2,EDNRA,CORO1A,THBS1,TREM2,LYN
GO: Biological Process	GO:0002922	positive regulation of humoral immune response			7.973e-05	0.5001	0.0005795	0.005401	5	21	HLA-DMA,FCGR2B,NOD2,PTPRC,C3
GO: Biological Process	GO:0035357	peroxisome proliferator activated receptor signaling pathway			7.973e-05	0.5001	0.0005795	0.005401	5	21	FABP5,TWIST1,PPARG,PTGIS,LEP
GO: Biological Process	GO:1903978	regulation of microglial cell activation			7.973e-05	0.5001	0.0005795	0.005401	5	21	PPARG,IL6,PTPRC,GRN,TREM2
GO: Biological Process	GO:0010759	positive regulation of macrophage chemotaxis			7.973e-05	0.5001	0.0005795	0.005401	5	21	CCL2,CCL5,C3AR1,C5AR1,THBS1
GO: Biological Process	GO:0061081	positive regulation of myeloid leukocyte cytokine production involved in immune response			7.973e-05	0.5001	0.0005795	0.005401	5	21	FCER1G,LILRB1,CD36,TLR2,TLR4
GO: Biological Process	GO:0051770	positive regulation of nitric-oxide synthase biosynthetic process			7.973e-05	0.5001	0.0005795	0.005401	5	21	CCL2,CCL20,NOD2,TLR2,TLR4
GO: Biological Process	GO:1904894	positive regulation of receptor signaling pathway via STAT			8.295e-05	0.5202	0.0006021	0.005612	10	101	CD300A,CCL5,IGF1,IL6,IL7R,IL10,IL10RA,LEP,LYN,HCLS1
GO: Biological Process	GO:0061515	myeloid cell development			8.403e-05	0.527	0.0006093	0.005679	9	82	EVI2B,TYROBP,FBN1,FLI1,ITGAM,LILRB1,SH2B3,TLR2,NCKAP1L
GO: Biological Process	GO:0045907	positive regulation of vasoconstriction			8.469e-05	0.5311	0.0006124	0.005708	7	48	HRH1,ALOX5,ICAM1,PTAFR,PTGS2,TBXAS1,CD38
GO: Biological Process	GO:0033628	regulation of cell adhesion mediated by integrin			8.469e-05	0.5311	0.0006124	0.005708	7	48	ADA,PIK3CG,LPXN,CCL5,SERPINE1,LYN,NCKAP1L
GO: Biological Process	GO:0038094	Fc-gamma receptor signaling pathway			8.475e-05	0.5316	0.0006124	0.005708	12	143	FCER1G,FCGR2A,FCGR2B,FGR,VAV1,IGKC,IGLC1,PTPRC,ARPC1B,LYN,HCK,NCKAP1L
GO: Biological Process	GO:0070482	response to oxygen levels			8.517e-05	0.5342	0.0006147	0.00573	23	425	HMOX1,ADA,TWIST1,UCP2,MMP2,COL1A1,ICAM1,RGCC,PPARG,FAS,POSTN,CYBB,GATA6,PTGIS,PTGS2,KCNMA1,TIGAR,LEP,EDNRA,THBS1,CD38,TLR2,CYB5R4
GO: Biological Process	GO:0045807	positive regulation of endocytosis			8.728e-05	0.5474	0.0006292	0.005865	11	122	SFRP4,APOE,PPARG,C3,RAB31,CD14,CD36,SERPINE1,TREM2,GREM1,NCKAP1L
GO: Biological Process	GO:0044057	regulation of system process			8.818e-05	0.5531	0.000635	0.005919	33	727	ADA,FABP5,ADORA2B,ADORA3,KCNE4,CLIC2,PIK3CG,AHR,HRH1,AIF1,COL14A1,MMP2,PLN,ALOX5,CNN1,LMCD1,ICAM1,IGF1,CTSS,IL6,IL10,INHBA,PTAFR,ITGAX,PTGS2,CCN4,KCNMA1,TBXAS1,RGS2,LEP,CD38,TLR4,TNFRSF1B
GO: Biological Process	GO:0035690	cellular response to drug			8.915e-05	0.5591	0.0006412	0.005977	25	484	SERPINF1,HMOX1,ADCY7,AHR,HRH1,AIF1,CCL7,AIM2,ANXA1,FOLR2,ICAM1,IL6,CYBB,SLAMF8,IL10,RIPK2,PTPN22,PTAFR,PTGS2,NOD2,GNA15,THBS1,SERPINE1,CD69,TNFAIP3
GO: Biological Process	GO:0070527	platelet aggregation			9.195e-05	0.5767	0.0006606	0.006158	8	65	PDGFRA,ACTN1,PIK3CG,PLEK,COMP,RAP2B,SH2B3,LYN
GO: Biological Process	GO:0043254	regulation of protein-containing complex assembly			9.21e-05	0.5776	0.0006609	0.00616	25	485	ABCA1,CLEC7A,AHR,CCL11,MMP1,PLEK,AIM2,ICAM1,GMFG,APOE,FAS,PYCARD,JCHAIN,XAF1,NAV3,CAPG,LCP1,ARPC1B,CORO1A,CD36,TLR2,TLR4,HCK,HCLS1,NCKAP1L
GO: Biological Process	GO:0002431	Fc receptor mediated stimulatory signaling pathway			9.687e-05	0.6076	0.000694	0.006469	12	145	FCER1G,FCGR2A,FCGR2B,FGR,VAV1,IGKC,IGLC1,PTPRC,ARPC1B,LYN,HCK,NCKAP1L
GO: Biological Process	GO:0002823	negative regulation of adaptive immune response based on somatic recombination of immune receptors built from immunoglobulin superfamily domains			9.693e-05	0.608	0.000694	0.006469	7	49	FCGR2B,CR1,IL7R,LILRB1,NOD2,PTPRC,IL33
GO: Biological Process	GO:0006629	lipid metabolic process			9.81e-05	0.6153	0.0007016	0.006539	55	1471	PLBD1,ABCA1,PDGFRA,CES1,PLD3,ME1,FABP4,FABP5,PLIN2,TWIST1,ADORA2B,PIK3CG,HRH1,FGF7,HSD11B1,ALDH1A3,FGR,PLEK,ALOX5,PLTP,ALOX5AP,ANXA1,RUBCNL,AOAH,APOC1,APOE,PPARG,ABCG1,IGF1,FAR2,CCN1,SDC3,FUCA1,IL1RN,SOAT1,LGMN,MYO5A,GATA6,PTGIS,PTGS2,NOD2,SMPDL3A,KCNMA1,GM2A,C3,ST8SIA4,NPC1,GLIPR1,TBXAS1,PLA2G7,LEP,LIPA,CD36,DHRS9,LYN
GO: Biological Process	GO:0002902	regulation of B cell apoptotic process			0.0001013	0.6354	0.0007237	0.006746	5	22	ADA,IL10,BTK,CD44,LYN
GO: Biological Process	GO:0032905	transforming growth factor beta1 production			0.0001027	0.6443	0.0007312	0.006816	4	12	TYROBP,GATA6,THBS1,LUM
GO: Biological Process	GO:0034135	regulation of toll-like receptor 2 signaling pathway			0.0001027	0.6443	0.0007312	0.006816	4	12	NOD2,TLR1,TNFAIP3,LYN
GO: Biological Process	GO:0002676	regulation of chronic inflammatory response			0.0001027	0.6443	0.0007312	0.006816	4	12	ADORA2B,CCL5,IL10,TNFAIP3
GO: Biological Process	GO:0030100	regulation of endocytosis			0.0001028	0.6449	0.0007312	0.006816	16	241	CD300A,SFRP4,APOC1,APOE,PPARG,LILRB1,C3,RAB31,LGALS3,MCTP1,CD14,CD36,SERPINE1,TREM2,GREM1,NCKAP1L
GO: Biological Process	GO:0097696	receptor signaling pathway via STAT			0.0001032	0.6472	0.000733	0.006832	14	192	CD300A,CCR2,CCL2,CCL5,IGF1,IL6,IL7R,IL10,IL10RA,PTPRC,SH2B3,LEP,LYN,HCLS1
GO: Biological Process	GO:1902564	negative regulation of neutrophil activation			0.0001049	0.6581	0.0007362	0.006862	3	5	CD300A,FCGR2B,GRN
GO: Biological Process	GO:0001796	regulation of type IIa hypersensitivity			0.0001049	0.6581	0.0007362	0.006862	3	5	FCER1G,FCGR2B,C3
GO: Biological Process	GO:0001794	type IIa hypersensitivity			0.0001049	0.6581	0.0007362	0.006862	3	5	FCER1G,FCGR2B,C3
GO: Biological Process	GO:0060266	negative regulation of respiratory burst involved in inflammatory response			0.0001049	0.6581	0.0007362	0.006862	3	5	SLAMF8,GRN,DUSP10
GO: Biological Process	GO:0002892	regulation of type II hypersensitivity			0.0001049	0.6581	0.0007362	0.006862	3	5	FCER1G,FCGR2B,C3
GO: Biological Process	GO:0097350	neutrophil clearance			0.0001049	0.6581	0.0007362	0.006862	3	5	CCR2,MERTK,ANXA1
GO: Biological Process	GO:0002238	response to molecule of fungal origin			0.0001049	0.6581	0.0007362	0.006862	3	5	CLEC7A,BTK,TLR2
GO: Biological Process	GO:0070427	nucleotide-binding oligomerization domain containing 1 signaling pathway			0.0001049	0.6581	0.0007362	0.006862	3	5	RIPK2,TLR4,TNFAIP3
GO: Biological Process	GO:1902031	regulation of NADP metabolic process			0.0001049	0.6581	0.0007362	0.006862	3	5	ME1,HSD11B1,TIGAR
GO: Biological Process	GO:0002445	type II hypersensitivity			0.0001049	0.6581	0.0007362	0.006862	3	5	FCER1G,FCGR2B,C3
GO: Biological Process	GO:0002580	regulation of antigen processing and presentation of peptide or polysaccharide antigen via MHC class II			0.0001049	0.6581	0.0007362	0.006862	3	5	PYCARD,THBS1,TREM2
GO: Biological Process	GO:0007160	cell-matrix adhesion			0.0001079	0.6768	0.0007562	0.007049	16	242	CORO1C,ACTN1,MMP12,COL3A1,COL16A1,FN1,POSTN,ITGA4,HPSE,ITGB2,EMILIN1,THBS1,CD36,SERPINE1,CD44,GREM1
GO: Biological Process	GO:2001233	regulation of apoptotic signaling pathway			0.0001091	0.684	0.0007634	0.007115	24	461	HMOX1,S100A8,S100A9,PLAUR,SRPX,MMP9,ICAM1,FAS,IGF1,PYCARD,INHBA,BCL2A1,PTGS2,STK4,PTPRC,ACKR3,SCG2,NUPR1,LGALS3,THBS1,GZMB,SERPINE1,CD44,TNFAIP3
GO: Biological Process	GO:0001894	tissue homeostasis			0.00011	0.6902	0.0007695	0.007172	17	268	ACP5,TCIRG1,CCR2,FGF7,COL14A1,JCHAIN,IGKC,CTSS,IL6,NOD2,RAC2,CORO1A,LIPA,CD38,TLR4,TNFAIP3,LYZ
GO: Biological Process	GO:0006953	acute-phase response			0.0001106	0.6936	0.0007724	0.007199	7	50	CEBPB,CD163,CCL5,FN1,IL1RN,IL6,PTGS2
GO: Biological Process	GO:1901224	positive regulation of NIK/NF-kappaB signaling			0.0001113	0.6984	0.000776	0.007233	9	85	TLR7,CHI3L1,NOD2,CD14,TLR1,TLR2,TLR4,TREM2,GREM1
GO: Biological Process	GO:0060761	negative regulation of response to cytokine stimulus			0.0001113	0.6984	0.000776	0.007233	9	85	CCL5,MMP12,SAMHD1,PPARG,IL1RN,IL6,PTPRC,SH2B3,IRAK3
GO: Biological Process	GO:0110149	regulation of biomineralization			0.0001151	0.7221	0.0008006	0.007462	10	105	CEBPB,TWIST1,MGP,CCR1,COMP,BMP2K,CCN1,SRGN,ASPN,GREM1
GO: Biological Process	GO:0070167	regulation of biomineral tissue development			0.0001151	0.7221	0.0008006	0.007462	10	105	CEBPB,TWIST1,MGP,CCR1,COMP,BMP2K,CCN1,SRGN,ASPN,GREM1
GO: Biological Process	GO:0003012	muscle system process			0.0001202	0.7536	0.0008346	0.007779	26	523	ACTA2,ACTG2,HMOX1,ADA,ADORA2B,KCNE4,CLIC2,PIK3CG,AIF1,COL14A1,PLN,CNN1,COMP,LMCD1,IGF1,GATA6,PTAFR,PTGS2,CCN4,SULF1,KCNMA1,RGS2,LEP,EDNRA,CD38,TNFRSF1B
GO: Biological Process	GO:0060429	epithelium development			0.0001211	0.7595	0.0008401	0.007831	55	1483	EREG,CEBPB,PDGFRA,CES1,ACTA2,TWIST1,MGP,BASP1,AHR,FGF7,PLAUR,CCL11,MAFF,MMP2,ALDH1A3,MMP9,MMP12,COL5A1,SFRP4,ANXA1,ICAM1,PPARG,AREG,IGF1,CCN1,VCAN,CSTA,CTSD,CTSL,IL6,CTSZ,CXCR2,IL10,MYO5A,INHBA,GATA6,ITGA4,HPSE,ITGAX,PTGS2,ZEB2,STK4,SULF1,KCNMA1,TAGLN,TIGAR,RAP2B,LCP1,EDNRA,LGALS3,DHRS9,SERPINE1,CD44,DUSP10,GREM1
GO: Biological Process	GO:0032928	regulation of superoxide anion generation			0.0001271	0.7972	0.0008809	0.008211	5	23	ACP5,CLEC7A,TYROBP,ITGAM,ITGB2
GO: Biological Process	GO:2000406	positive regulation of T cell migration			0.0001277	0.8009	0.000884	0.00824	6	36	CCR2,AIF1,CCL5,CCL20,PYCARD,ITGA4
GO: Biological Process	GO:0001763	morphogenesis of a branching structure			0.0001305	0.8186	0.0009026	0.008413	16	246	PDGFRA,MGP,AHR,FGF7,CCL11,AREG,IGF1,CTSD,IL6,CTSZ,IL10,STK4,SULF1,EDNRA,CD44,GREM1
GO: Biological Process	GO:0043112	receptor metabolic process			0.0001318	0.8264	0.0009102	0.008484	15	221	FCER1G,SFRP4,APOE,PPARG,CXCL8,CXCR2,IL10,LGMN,ITGB2,LILRB1,TRAT1,ACKR3,RAB31,CD36,GREM1
GO: Biological Process	GO:0045861	negative regulation of proteolysis			0.0001383	0.8676	0.0009544	0.008896	21	382	SERPINF1,PLAUR,MMP9,COL6A3,CR1,IGF1,LAMP3,CSTA,CSTB,IL6,CTSZ,IL10,NAIP,PTGS2,C3,RARRES1,THBS1,TIMP1,TIMP2,SERPINE1,CD44
GO: Biological Process	GO:0042267	natural killer cell mediated cytotoxicity			0.000141	0.8844	0.0009708	0.009049	8	69	MICB,VAV1,SLAMF7,LILRB1,LEP,CORO1A,GZMB,CRTAM
GO: Biological Process	GO:0042093	T-helper cell differentiation			0.000141	0.8844	0.0009708	0.009049	8	69	CCR2,CCL20,ANXA1,IL6,RIPK2,GPR183,NLRP3,CD86
GO: Biological Process	GO:0001649	osteoblast differentiation			0.0001433	0.8988	0.0009855	0.009186	16	248	CEBPB,CLEC5A,TCIRG1,TWIST1,AHR,GPNMB,COL1A1,AREG,IGF1,CCN1,VCAN,IL6,RASSF2,CCN4,LOX,GREM1
GO: Biological Process	GO:0021782	glial cell development			0.0001441	0.9037	0.0009898	0.009226	11	129	S100A8,S100A9,IL6,ITGAM,C1QA,C5AR1,GRN,TLR2,TLR4,TREM2,LYN
GO: Biological Process	GO:0002923	regulation of humoral immune response mediated by circulating immunoglobulin			0.0001458	0.9144	0.0009917	0.009244	4	13	FCGR2B,CR1,NOD2,PTPRC
GO: Biological Process	GO:0072683	T cell extravasation			0.0001458	0.9144	0.0009917	0.009244	4	13	CCR2,CCL2,CCL5,ICAM1
GO: Biological Process	GO:0033004	negative regulation of mast cell activation			0.0001458	0.9144	0.0009917	0.009244	4	13	CD300A,HMOX1,MILR1,CD84
GO: Biological Process	GO:0033197	response to vitamin E			0.0001458	0.9144	0.0009917	0.009244	4	13	ADA,COL1A1,PPARG,LEP
GO: Biological Process	GO:0002468	dendritic cell antigen processing and presentation			0.0001458	0.9144	0.0009917	0.009244	4	13	FCGR2B,NOD2,CLEC4A,THBS1
GO: Biological Process	GO:0071888	macrophage apoptotic process			0.0001458	0.9144	0.0009917	0.009244	4	13	CCL5,CCR5,CTSL,NOD2
GO: Biological Process	GO:0033700	phospholipid efflux			0.0001458	0.9144	0.0009917	0.009244	4	13	ABCA1,APOC1,APOE,ABCG1
GO: Biological Process	GO:0045628	regulation of T-helper 2 cell differentiation			0.0001458	0.9144	0.0009917	0.009244	4	13	ANXA1,IL6,NLRP3,CD86
GO: Biological Process	GO:0002524	hypersensitivity			0.0001458	0.9144	0.0009917	0.009244	4	13	FCER1G,FCGR2B,BTK,C3
GO: Biological Process	GO:0010742	macrophage derived foam cell differentiation			0.0001496	0.9382	0.001014	0.009454	6	37	ABCA1,PPARG,MSR1,ABCG1,SOAT1,CD36
GO: Biological Process	GO:0045920	negative regulation of exocytosis			0.0001496	0.9382	0.001014	0.009454	6	37	CD300A,HMOX1,CCR2,FCGR2B,ANXA1,CD84
GO: Biological Process	GO:0045589	regulation of regulatory T cell differentiation			0.0001496	0.9382	0.001014	0.009454	6	37	LILRB2,CR1,LILRB4,CD28,CD44,DUSP10
GO: Biological Process	GO:0042130	negative regulation of T cell proliferation			0.0001562	0.9795	0.001057	0.009849	8	70	CEBPB,LILRB2,VSIG4,GPNMB,IL10,LILRB1,CD86,CD44
GO: Biological Process	GO:0070228	regulation of lymphocyte apoptotic process			0.0001562	0.9795	0.001057	0.009849	8	70	ADA,CCL5,IL7R,IL10,BTK,LGALS3,CD44,LYN
GO: Biological Process	GO:0045761	regulation of adenylate cyclase activity			0.0001572	0.9857	0.001062	0.009899	16	250	ABCA1,ADGRE2,ADCY7,CCR2,ADORA2B,CXCL9,PLN,GPR65,FPR1,MARCO,PTGDR,GNA15,RGS1,RGS2,EDNRA,TIMP2
GO: Biological Process	GO:0046641	positive regulation of alpha-beta T cell proliferation			0.0001576	0.9888	0.001062	0.009899	5	24	CCR2,RIPK2,PTPN22,PTPRC,CD28
GO: Biological Process	GO:0051043	regulation of membrane protein ectodomain proteolysis			0.0001576	0.9888	0.001062	0.009899	5	24	APOE,IL10,TIMP1,TIMP2,TNFRSF1B
GO: Biological Process	GO:0002710	negative regulation of T cell mediated immunity			0.0001576	0.9888	0.001062	0.009899	5	24	FCGR2B,IL7R,LILRB1,NOD2,PTPRC
GO: Biological Process	GO:1903305	regulation of regulated secretory pathway			0.0001588	0.9962	0.001069	0.009963	14	200	CD300A,HMOX1,ADGRE2,CCR2,ADORA2B,FCER1G,FCGR2B,FGR,PTAFR,ITGAM,ITGB2,CD84,RAC2,LYN
GO: Biological Process	GO:0007568	aging			0.0001603	1	0.001078	0.01005	20	358	SERPINF1,ADA,TWIST1,CCL11,MMP2,MMP9,COMP,ICAM1,APOE,IL10,BCL2A1,DCN,ITGB2,PTGS2,C1QA,LEP,TIMP1,TIMP2,SERPINE1,TNFRSF1B
GO: Biological Process	GO:0046849	bone remodeling			0.0001697	1	0.001139	0.01062	10	110	ACP5,TCIRG1,CTSS,IL6,RASSF2,RAC2,LEP,CD38,TNFAIP3,GREM1
GO: Biological Process	GO:0002294	CD4-positive, alpha-beta T cell differentiation involved in immune response			0.0001726	1	0.001158	0.01079	8	71	CCR2,CCL20,ANXA1,IL6,RIPK2,GPR183,NLRP3,CD86
GO: Biological Process	GO:0090077	foam cell differentiation			0.0001743	1	0.001166	0.01087	6	38	ABCA1,PPARG,MSR1,ABCG1,SOAT1,CD36
GO: Biological Process	GO:0032691	negative regulation of interleukin-1 beta production			0.0001743	1	0.001166	0.01087	6	38	ACP5,IGF1,NLRP3,CD33,TREM2,TNFAIP3
GO: Biological Process	GO:0090322	regulation of superoxide metabolic process			0.0001743	1	0.001166	0.01087	6	38	ACP5,CLEC7A,TYROBP,ITGAM,ITGB2,CD36
GO: Biological Process	GO:0035821	modulation of process of other organism			0.0001781	1	0.00119	0.01109	13	178	CLEC7A,S100A9,S100A12,FBLN1,CCL2,CCL4,CCL5,CCL8,MMP9,APOE,TLR2,TREM1,LYZ
GO: Biological Process	GO:0016032	viral process			0.0001803	1	0.001203	0.01121	36	853	CFH,PDGFRA,CLEC5A,HLA-DRA,CCR2,FBLN1,FCGR2B,FCN1,MICB,CCL2,CCL4,CCL5,CCR5,CCL8,MMP1,EEA1,MMP9,MRC1,PILRA,ICAM1,APOE,CR1,RSAD2,LAMP3,CXCL8,LRRC15,NRP2,ACKR3,C1QA,NPC1,DOCK2,LGALS1,CD28,CD86,LYN,HCK
GO: Biological Process	GO:0006979	response to oxidative stress			0.0001833	1	0.001222	0.01139	25	507	PDGFRA,HMOX1,ADA,MICB,UCP2,AIF1,MMP2,MMP9,COL1A1,ANXA1,APOE,AREG,IL6,CYBB,IL10,NCF2,NCF4,PTGS2,BTK,THBS1,MCTP1,CD36,CD38,TLR4,TNFAIP3
GO: Biological Process	GO:0010876	lipid localization			0.000185	1	0.001232	0.01148	23	448	ABCA1,ATP8B4,CES1,SLCO2B1,FABP4,PLIN2,PLTP,ANXA1,APOC1,APOE,PPARG,AQP9,MSR1,ABCG1,IL6,SOAT1,INHBA,GM2A,C3,NPC1,LEP,THBS1,CD36
GO: Biological Process	GO:0032479	regulation of type I interferon production			0.0001888	1	0.001256	0.01171	11	133	TLR7,MMP12,PYCARD,IL10,RIPK2,PTPN22,LILRB1,CD14,TLR2,TLR4,TNFAIP3
GO: Biological Process	GO:0007167	enzyme linked receptor protein signaling pathway			0.0001898	1	0.001261	0.01175	44	1124	EREG,PDGFRA,TCIRG1,FBN1,CCL2,FGF7,PLAUR,MMP2,FGR,MERTK,MMP9,VAV1,COL1A1,COL1A2,COL3A1,SFRP4,COMP,AREG,IGF1,CCN1,CYBB,LGMN,INHBA,RASSF2,ASPN,GATA6,NCF2,NCF4,DCN,NRP2,PTPRE,TRAT1,SULF1,SH2B3,LCP2,EMILIN1,ARPC1B,LEP,THBS1,LOX,GREM1,LYN,HCK,NCKAP1L
GO: Biological Process	GO:0002293	alpha-beta T cell differentiation involved in immune response			0.0001905	1	0.001263	0.01177	8	72	CCR2,CCL20,ANXA1,IL6,RIPK2,GPR183,NLRP3,CD86
GO: Biological Process	GO:0002287	alpha-beta T cell activation involved in immune response			0.0001905	1	0.001263	0.01177	8	72	CCR2,CCL20,ANXA1,IL6,RIPK2,GPR183,NLRP3,CD86
GO: Biological Process	GO:0032727	positive regulation of interferon-alpha production			0.0001935	1	0.001279	0.01192	5	25	TLR7,MMP12,RIPK2,PTPN22,TLR4
GO: Biological Process	GO:0032703	negative regulation of interleukin-2 production			0.0001935	1	0.001279	0.01192	5	25	VSIG4,NOD2,PTPRC,NAV3,TNFAIP3
GO: Biological Process	GO:0002693	positive regulation of cellular extravasation			0.0001935	1	0.001279	0.01192	5	25	CCR2,CCL2,ICAM1,ITGA4,PTAFR
GO: Biological Process	GO:0007249	I-kappaB kinase/NF-kappaB signaling			0.0001941	1	0.001281	0.01194	17	281	TLR7,HMOX1,LY96,S100A12,PYCARD,IL1RN,RASSF2,RIPK2,NOD2,BTK,CASP1,LGALS1,CD14,CD36,TLR2,TLR4,TNFAIP3
GO: Biological Process	GO:0051917	regulation of fibrinolysis			0.0002005	1	0.001318	0.01229	4	14	FAP,THBD,THBS1,SERPINE1
GO: Biological Process	GO:0045060	negative thymic T cell selection			0.0002005	1	0.001318	0.01229	4	14	FAS,PTPRC,DOCK2,CD28
GO: Biological Process	GO:0035358	regulation of peroxisome proliferator activated receptor signaling pathway			0.0002005	1	0.001318	0.01229	4	14	FABP5,TWIST1,PTGIS,LEP
GO: Biological Process	GO:0070486	leukocyte aggregation			0.0002005	1	0.001318	0.01229	4	14	S100A8,S100A9,RAC2,CD44
GO: Biological Process	GO:0014066	regulation of phosphatidylinositol 3-kinase signaling			0.0002017	1	0.001324	0.01234	11	134	PDGFRA,TWIST1,PIK3CG,CCL5,FGR,IGF1,DCN,LEP,CD28,LYN,HCLS1
GO: Biological Process	GO:0032689	negative regulation of interferon-gamma production			0.0002022	1	0.001324	0.01234	6	39	IL10,INHBA,LILRB1,NOD2,IL33,TLR4
GO: Biological Process	GO:0046640	regulation of alpha-beta T cell proliferation			0.0002022	1	0.001324	0.01234	6	39	CCR2,RIPK2,PTPN22,PTPRC,CD28,CD44
GO: Biological Process	GO:0002701	negative regulation of production of molecular mediator of immune response			0.0002022	1	0.001324	0.01234	6	39	HMOX1,FCGR2B,IL10,LILRB1,IL33,IRAK3
GO: Biological Process	GO:0060264	regulation of respiratory burst involved in inflammatory response			0.0002064	1	0.00134	0.01249	3	6	SLAMF8,GRN,DUSP10
GO: Biological Process	GO:1903613	regulation of protein tyrosine phosphatase activity			0.0002064	1	0.00134	0.01249	3	6	PTPRC,LGALS3,CD33
GO: Biological Process	GO:0034136	negative regulation of toll-like receptor 2 signaling pathway			0.0002064	1	0.00134	0.01249	3	6	NOD2,TNFAIP3,LYN
GO: Biological Process	GO:0010757	negative regulation of plasminogen activation			0.0002064	1	0.00134	0.01249	3	6	CTSZ,THBS1,SERPINE1
GO: Biological Process	GO:0038044	transforming growth factor-beta secretion			0.0002064	1	0.00134	0.01249	3	6	FBLN1,FN1,LILRB1
GO: Biological Process	GO:2000503	positive regulation of natural killer cell chemotaxis			0.0002064	1	0.00134	0.01249	3	6	CCL4,CCL5,CCL7
GO: Biological Process	GO:0002767	immune response-inhibiting cell surface receptor signaling pathway			0.0002064	1	0.00134	0.01249	3	6	LILRB2,LILRB1,LYN
GO: Biological Process	GO:1903238	positive regulation of leukocyte tethering or rolling			0.0002064	1	0.00134	0.01249	3	6	CCR2,ITGA4,PTAFR
GO: Biological Process	GO:0070848	response to growth factor			0.0002085	1	0.001353	0.01261	34	794	PDGFRA,TWIST1,FBN1,CCL2,FGF7,CCL5,COL1A1,COL1A2,COL3A1,MXRA5,SFRP4,COMP,ANXA1,POSTN,CCN1,IL6,CXCL8,IL10,LGMN,ASPN,GATA6,DCN,NRP2,SULF1,EMILIN1,CORO1A,THBS1,EGR3,LOX,SERPINE1,CD44,GREM1,LUM,TNFRSF1B
GO: Biological Process	GO:0002228	natural killer cell mediated immunity			0.0002099	1	0.001358	0.01266	8	73	MICB,VAV1,SLAMF7,LILRB1,LEP,CORO1A,GZMB,CRTAM
GO: Biological Process	GO:0010812	negative regulation of cell-substrate adhesion			0.0002099	1	0.001358	0.01266	8	73	CORO1C,FBLN1,MMP12,COL1A1,POSTN,LGALS1,THBS1,SERPINE1
GO: Biological Process	GO:0048145	regulation of fibroblast proliferation			0.0002118	1	0.001369	0.01276	10	113	EREG,PDGFRA,CD300A,FBLN1,MMP9,FN1,PPARG,IGF1,NUPR1,SERPINE1
GO: Biological Process	GO:0010634	positive regulation of epithelial cell migration			0.0002218	1	0.001431	0.01334	13	182	HMOX1,ADORA2B,FGF7,MMP9,ANXA1,IGF1,LGMN,PTGS2,NRP2,SRPX2,GRN,THBS1,SERPINE1
GO: Biological Process	GO:0007259	receptor signaling pathway via JAK-STAT			0.0002218	1	0.001431	0.01334	13	182	CD300A,CCR2,CCL2,CCL5,IGF1,IL6,IL10,IL10RA,PTPRC,SH2B3,LEP,LYN,HCLS1
GO: Biological Process	GO:0032088	negative regulation of NF-kappaB transcription factor activity			0.0002226	1	0.001435	0.01337	9	93	ADORA3,AIM2,PYCARD,IL10,PTGIS,NOD2,NLRP3,IRAK3,TNFAIP3
GO: Biological Process	GO:0007498	mesoderm development			0.0002249	1	0.001448	0.0135	16	258	MMP2,MMP9,COL5A1,COL5A2,COL8A1,FN1,IL1RN,IL10,INHBA,GATA6,ITGA4,ITGB2,BTK,ZFPM2,TNFAIP3,HCK
GO: Biological Process	GO:0043409	negative regulation of MAPK cascade			0.0002271	1	0.001461	0.01362	14	207	CD300A,FBLN1,SFRP4,APOE,IGF1,PTPN22,PTPRC,SH2B3,EMILIN1,RGS2,TLR4,IRAK3,DUSP10,LYN
GO: Biological Process	GO:0032648	regulation of interferon-beta production			0.000229	1	0.001472	0.01372	7	56	TLR7,PYCARD,RIPK2,PTPN22,LILRB1,TLR2,TLR4
GO: Biological Process	GO:0032606	type I interferon production			0.0002297	1	0.001474	0.01374	11	136	TLR7,MMP12,PYCARD,IL10,RIPK2,PTPN22,LILRB1,CD14,TLR2,TLR4,TNFAIP3
GO: Biological Process	GO:0032987	protein-lipid complex disassembly			0.0002308	1	0.001477	0.01377	8	74	HMOX1,APOC1,APOE,MSR1,SOAT1,NPC1,LIPA,CD36
GO: Biological Process	GO:0034381	plasma lipoprotein particle clearance			0.0002308	1	0.001477	0.01377	8	74	HMOX1,APOC1,APOE,MSR1,SOAT1,NPC1,LIPA,CD36
GO: Biological Process	GO:0071829	plasma lipoprotein particle disassembly			0.0002308	1	0.001477	0.01377	8	74	HMOX1,APOC1,APOE,MSR1,SOAT1,NPC1,LIPA,CD36
GO: Biological Process	GO:0048511	rhythmic process			0.0002315	1	0.00148	0.0138	19	340	EREG,PDGFRA,SERPINF1,ADA,TWIST1,AHR,HRH1,ANXA1,PPARG,FAS,IGF1,IL6,INHBA,KCNMA1,HS3ST2,LEP,EGR2,EGR3,SERPINE1
GO: Biological Process	GO:0045066	regulatory T cell differentiation			0.0002335	1	0.001491	0.0139	6	40	LILRB2,CR1,LILRB4,CD28,CD44,DUSP10
GO: Biological Process	GO:0060541	respiratory system development			0.000235	1	0.001498	0.01396	16	259	PDGFRA,CHI3L1,ADA,MGP,BASP1,FGF7,HSD11B1,ALDH1A3,IGF1,CTSD,CTSZ,GATA6,CRISPLD2,ZFPM2,LIPA,LOX
GO: Biological Process	GO:0010226	response to lithium ion			0.0002352	1	0.001498	0.01396	5	26	ADCY7,FABP4,PPARG,FAS,PTGS2
GO: Biological Process	GO:0045061	thymic T cell selection			0.0002352	1	0.001498	0.01396	5	26	HLA-DMA,FAS,PTPRC,DOCK2,CD28
GO: Biological Process	GO:0050848	regulation of calcium-mediated signaling			0.0002445	1	0.001555	0.0145	10	115	ADA,CLIC2,CCL4,PLEK,PLN,LMCD1,IGF1,MYO5A,TRAT1,TREM2
GO: Biological Process	GO:0003006	developmental process involved in reproduction			0.0002451	1	0.001558	0.01452	34	801	EREG,CEBPB,PDGFRA,SERPINF1,ADA,BASP1,AHR,FGF7,PLAUR,MMP2,MERTK,VWF,ANXA1,ICAM1,PPARG,AREG,IGF1,CCN1,IL10,INHBA,GATA6,ITGA4,PTGDR,DCN,PTGIS,PTGS2,STK4,SULF1,NUPR1,LEP,ZFPM2,SERPINE1,CD44,LHFPL2
GO: Biological Process	GO:0097305	response to alcohol			0.0002454	1	0.001558	0.01452	16	260	ABCA1,ADCY7,S100A8,AHR,CCL7,CCR5,ICAM1,PPARG,IGF1,CYBB,INHBA,PTGDR,RGS2,LEP,CD14,TLR4
GO: Biological Process	GO:0031343	positive regulation of cell killing			0.0002534	1	0.001607	0.01498	8	75	CLEC7A,TYROBP,MICB,CCL2,VAV1,ITGAM,PTPRC,CRTAM
GO: Biological Process	GO:0032965	regulation of collagen biosynthetic process			0.0002562	1	0.001618	0.01508	7	57	ADORA2B,CCL2,RGCC,PPARG,IL6,EMILIN1,SERPINE1
GO: Biological Process	GO:0001913	T cell mediated cytotoxicity			0.0002562	1	0.001618	0.01508	7	57	FCGR2B,MICB,IL7R,LILRB1,PTPRC,GZMB,CRTAM
GO: Biological Process	GO:0009620	response to fungus			0.0002562	1	0.001618	0.01508	7	57	CLEC7A,S100A8,S100A9,S100A12,BTK,TLR2,TLR4
GO: Biological Process	GO:0010001	glial cell differentiation			0.0002562	1	0.001618	0.01508	16	261	S100A8,S100A9,PPARG,IGF1,IL6,ITGAM,C1QA,C5AR1,GRN,EGR2,TLR2,TLR4,TREM2,DUSP10,TNFRSF1B,LYN
GO: Biological Process	GO:0001890	placenta development			0.0002603	1	0.001642	0.01531	13	185	CEBPB,ADA,VWF,PPARG,CCN1,IL10,ITGA4,DCN,PTGIS,PTGS2,STK4,LEP,SERPINE1
GO: Biological Process	GO:0051348	negative regulation of transferase activity			0.0002666	1	0.00168	0.01566	18	316	CD300A,CORO1C,FABP4,BAG2,GMFG,APOE,PPARG,PYCARD,IL6,PTPN22,PTPRC,TIGAR,SH2B3,RGS2,IRAK3,DUSP10,TNFAIP3,LYN
GO: Biological Process	GO:0043383	negative T cell selection			0.0002687	1	0.001689	0.01574	4	15	FAS,PTPRC,DOCK2,CD28
GO: Biological Process	GO:0002863	positive regulation of inflammatory response to antigenic stimulus			0.0002687	1	0.001689	0.01574	4	15	FCER1G,BTK,C3,CD28
GO: Biological Process	GO:0090197	positive regulation of chemokine secretion			0.0002687	1	0.001689	0.01574	4	15	AIF1,POSTN,PYCARD,IL33
GO: Biological Process	GO:0031668	cellular response to extracellular stimulus			0.00027	1	0.001695	0.0158	17	289	HMOX1,ADORA2B,AIF1,UPP1,MMP9,COL1A1,FOLR2,ICAM1,PPARG,FAS,POSTN,CYBB,ITGA4,PTGS2,PTPRC,LEP,LYN
GO: Biological Process	GO:0071248	cellular response to metal ion			0.0002765	1	0.001734	0.01617	14	211	SERPINF1,HMOX1,ADCY7,FABP4,MMP9,ALOX5AP,FN1,PPARG,FAS,CYBB,LGMN,PTGS2,TIGAR,MCOLN1
GO: Biological Process	GO:0038096	Fc-gamma receptor signaling pathway involved in phagocytosis			0.0002777	1	0.001738	0.0162	11	139	FCGR2A,FCGR2B,FGR,VAV1,IGKC,IGLC1,PTPRC,ARPC1B,LYN,HCK,NCKAP1L
GO: Biological Process	GO:0002433	immune response-regulating cell surface receptor signaling pathway involved in phagocytosis			0.0002777	1	0.001738	0.0162	11	139	FCGR2A,FCGR2B,FGR,VAV1,IGKC,IGLC1,PTPRC,ARPC1B,LYN,HCK,NCKAP1L
GO: Biological Process	GO:0019058	viral life cycle			0.0002782	1	0.00174	0.01622	19	345	CLEC5A,FCN1,CCL2,CCL5,CCR5,CCL8,EEA1,MRC1,ICAM1,APOE,CR1,RSAD2,LAMP3,CXCL8,LRRC15,NPC1,LGALS1,CD28,CD86
GO: Biological Process	GO:0017157	regulation of exocytosis			0.0002791	1	0.001744	0.01625	16	263	CD300A,HMOX1,ADGRE2,CCR2,ADORA2B,FCER1G,FCGR2B,FGR,ANXA1,MYO5A,PTAFR,ITGAM,ITGB2,CD84,RAC2,LYN
GO: Biological Process	GO:0051769	regulation of nitric-oxide synthase biosynthetic process			0.0002835	1	0.001766	0.01646	5	27	CCL2,CCL20,NOD2,TLR2,TLR4
GO: Biological Process	GO:0051767	nitric-oxide synthase biosynthetic process			0.0002835	1	0.001766	0.01646	5	27	CCL2,CCL20,NOD2,TLR2,TLR4
GO: Biological Process	GO:1903306	negative regulation of regulated secretory pathway			0.0002835	1	0.001766	0.01646	5	27	CD300A,HMOX1,CCR2,FCGR2B,CD84
GO: Biological Process	GO:0006636	unsaturated fatty acid biosynthetic process			0.0002859	1	0.001775	0.01655	7	58	FABP5,ALOX5,ALOX5AP,ANXA1,PTGIS,PTGS2,TBXAS1
GO: Biological Process	GO:0031638	zymogen activation			0.0002859	1	0.001775	0.01655	7	58	PYCARD,CTSZ,LGMN,RIPK2,C1R,THBS1,SERPINE1
GO: Biological Process	GO:0032608	interferon-beta production			0.0002859	1	0.001775	0.01655	7	58	TLR7,PYCARD,RIPK2,PTPN22,LILRB1,TLR2,TLR4
GO: Biological Process	GO:0046427	positive regulation of receptor signaling pathway via JAK-STAT			0.000306	1	0.001896	0.01768	9	97	CD300A,CCL5,IGF1,IL6,IL10,IL10RA,LEP,LYN,HCLS1
GO: Biological Process	GO:0043154	negative regulation of cysteine-type endopeptidase activity involved in apoptotic process			0.000306	1	0.001896	0.01768	9	97	PLAUR,MMP9,IGF1,LAMP3,IL6,NAIP,PTGS2,THBS1,CD44
GO: Biological Process	GO:0002891	positive regulation of immunoglobulin mediated immune response			0.0003074	1	0.001901	0.01772	6	42	FCER1G,NOD2,PTPRC,BTK,C3,CD28
GO: Biological Process	GO:0002714	positive regulation of B cell mediated immunity			0.0003074	1	0.001901	0.01772	6	42	FCER1G,NOD2,PTPRC,BTK,C3,CD28
GO: Biological Process	GO:0016485	protein processing			0.0003085	1	0.001905	0.01775	15	239	CES1,SPON1,COMP,BAG2,CPA3,SRGN,PYCARD,CTSS,CTSZ,LGMN,RIPK2,C1R,CASP1,THBS1,SERPINE1
GO: Biological Process	GO:0010594	regulation of endothelial cell migration			0.0003085	1	0.001905	0.01775	15	239	SERPINF1,HMOX1,ADORA2B,ANXA1,RGCC,APOE,PPARG,IGF1,LGMN,DCN,PTGS2,NRP2,SRPX2,GRN,THBS1
GO: Biological Process	GO:0061919	process utilizing autophagic mechanism			0.0003104	1	0.001912	0.01783	25	525	TCIRG1,HMOX1,S100A8,S100A9,SRPX,RUBCNL,IRF8,PYCARD,LAMP3,CTSD,IL10,IL10RA,RIPK2,PTPN22,DCN,NOD2,CD84,NPC1,TIGAR,NUPR1,MCOLN1,LEP,TLR2,TREM2,TNFAIP3
GO: Biological Process	GO:0006914	autophagy			0.0003104	1	0.001912	0.01783	25	525	TCIRG1,HMOX1,S100A8,S100A9,SRPX,RUBCNL,IRF8,PYCARD,LAMP3,CTSD,IL10,IL10RA,RIPK2,PTPN22,DCN,NOD2,CD84,NPC1,TIGAR,NUPR1,MCOLN1,LEP,TLR2,TREM2,TNFAIP3
GO: Biological Process	GO:0031279	regulation of cyclase activity			0.0003168	1	0.00195	0.01817	16	266	ABCA1,ADGRE2,ADCY7,CCR2,ADORA2B,CXCL9,PLN,GPR65,FPR1,MARCO,PTGDR,GNA15,RGS1,RGS2,EDNRA,TIMP2
GO: Biological Process	GO:0046456	icosanoid biosynthetic process			0.0003182	1	0.001957	0.01824	7	59	FABP5,ALOX5,ALOX5AP,ANXA1,PTGIS,PTGS2,TBXAS1
GO: Biological Process	GO:0001938	positive regulation of endothelial cell proliferation			0.0003226	1	0.001982	0.01847	10	119	HMOX1,ADORA2B,CCL2,CCL11,IGF1,IL10,ITGA4,NRP2,SCG2,EGR3
GO: Biological Process	GO:1904892	regulation of receptor signaling pathway via STAT			0.0003254	1	0.001997	0.01861	12	165	CD300A,CCL5,IGF1,IL6,IL7R,IL10,IL10RA,PTPRC,SH2B3,LEP,LYN,HCLS1
GO: Biological Process	GO:0048545	response to steroid hormone			0.0003265	1	0.002002	0.01866	21	407	SERPINF1,AIF1,COL1A1,ANXA1,ICAM1,PPARG,FAS,AREG,IGF1,IL1RN,IL6,CYBB,IL10,PTAFR,PTGS2,KCNMA1,NPC1,THBS1,LOX,CD38,TLR2
GO: Biological Process	GO:0000302	response to reactive oxygen species			0.0003302	1	0.002023	0.01885	16	267	PDGFRA,HMOX1,ADA,UCP2,MMP2,MMP9,COL1A1,ANXA1,APOE,AREG,IL6,IL10,BTK,THBS1,CD36,TNFAIP3
GO: Biological Process	GO:0044409	entry into host			0.000334	1	0.002044	0.01905	11	142	CLEC5A,FCN1,CCR5,MRC1,ICAM1,CR1,LAMP3,CXCL8,NPC1,LGALS1,CD86
GO: Biological Process	GO:0043433	negative regulation of DNA-binding transcription factor activity			0.0003371	1	0.002061	0.01921	13	190	HMOX1,TWIST1,ADORA3,AIM2,SFRP4,PYCARD,IL10,PTGIS,NOD2,NUPR1,NLRP3,IRAK3,TNFAIP3
GO: Biological Process	GO:0031664	regulation of lipopolysaccharide-mediated signaling pathway			0.0003388	1	0.002061	0.01921	5	28	LY96,LY86,CD84,CD36,TNFAIP3
GO: Biological Process	GO:0042730	fibrinolysis			0.0003388	1	0.002061	0.01921	5	28	FAP,PLAUR,THBD,THBS1,SERPINE1
GO: Biological Process	GO:0050901	leukocyte tethering or rolling			0.0003388	1	0.002061	0.01921	5	28	CCR2,SELL,ITGA4,PTAFR,LEP
GO: Biological Process	GO:0085029	extracellular matrix assembly			0.0003388	1	0.002061	0.01921	5	28	MFAP4,COL1A2,RGCC,EMILIN1,LOX
GO: Biological Process	GO:0048143	astrocyte activation			0.0003388	1	0.002061	0.01921	5	28	IL6,C1QA,C5AR1,GRN,TREM2
GO: Biological Process	GO:0006869	lipid transport			0.0003485	1	0.002117	0.01974	21	409	ABCA1,ATP8B4,CES1,SLCO2B1,FABP4,PLIN2,PLTP,ANXA1,APOC1,APOE,PPARG,AQP9,MSR1,ABCG1,SOAT1,INHBA,GM2A,NPC1,LEP,THBS1,CD36
GO: Biological Process	GO:0071900	regulation of protein serine/threonine kinase activity			0.0003487	1	0.002117	0.01974	26	560	CD300A,ADORA2B,S100A12,PIK3CG,MAP3K8,FPR1,RGCC,APOE,IGF1,PYCARD,IL1RN,RIPK2,PTPN22,ZEB2,NOD2,STK4,PTPRC,C5AR1,SH2B3,RGS2,THBS1,TLR4,IRAK3,DUSP10,TNFAIP3,LYN
GO: Biological Process	GO:0001820	serotonin secretion			0.000352	1	0.002127	0.01982	4	16	CD300A,FCER1G,LILRB1,LGALS3
GO: Biological Process	GO:0002864	regulation of acute inflammatory response to antigenic stimulus			0.000352	1	0.002127	0.01982	4	16	FCER1G,FCGR2B,BTK,C3
GO: Biological Process	GO:0002281	macrophage activation involved in immune response			0.000352	1	0.002127	0.01982	4	16	TYROBP,IL33,GRN,TREM2
GO: Biological Process	GO:0071639	positive regulation of monocyte chemotactic protein-1 production			0.000352	1	0.002127	0.01982	4	16	CLEC7A,TWIST1,NOD2,CD84
GO: Biological Process	GO:0010875	positive regulation of cholesterol efflux			0.000352	1	0.002127	0.01982	4	16	ABCA1,PLTP,APOE,ABCG1
GO: Biological Process	GO:0035265	organ growth			0.0003523	1	0.002127	0.01982	15	242	PDGFRA,BASP1,AHR,FGF7,COL14A1,COL6A3,COMP,IGF1,GATA6,STK4,CCN4,RGS2,LEP,ZFPM2,THBS1
GO: Biological Process	GO:0033344	cholesterol efflux			0.0003535	1	0.002128	0.01984	7	60	ABCA1,PLTP,APOC1,APOE,ABCG1,SOAT1,NPC1
GO: Biological Process	GO:2000110	negative regulation of macrophage apoptotic process			0.0003552	1	0.002128	0.01984	3	7	CCL5,CCR5,NOD2
GO: Biological Process	GO:0060268	negative regulation of respiratory burst			0.0003552	1	0.002128	0.01984	3	7	SLAMF8,GRN,DUSP10
GO: Biological Process	GO:0043305	negative regulation of mast cell degranulation			0.0003552	1	0.002128	0.01984	3	7	CD300A,HMOX1,CD84
GO: Biological Process	GO:0034128	negative regulation of MyD88-independent toll-like receptor signaling pathway			0.0003552	1	0.002128	0.01984	3	7	LY96,CD14,TLR4
GO: Biological Process	GO:0070432	regulation of nucleotide-binding oligomerization domain containing 2 signaling pathway			0.0003552	1	0.002128	0.01984	3	7	PTPN22,TLR4,TNFAIP3
GO: Biological Process	GO:2000553	positive regulation of T-helper 2 cell cytokine production			0.0003552	1	0.002128	0.01984	3	7	RSAD2,IL6,NLRP3
GO: Biological Process	GO:0002536	respiratory burst involved in inflammatory response			0.0003552	1	0.002128	0.01984	3	7	SLAMF8,GRN,DUSP10
GO: Biological Process	GO:1903524	positive regulation of blood circulation			0.0003565	1	0.002129	0.01985	9	99	ADA,HRH1,ALOX5,ICAM1,PTAFR,PTGS2,TBXAS1,RGS2,CD38
GO: Biological Process	GO:1903035	negative regulation of response to wounding			0.0003565	1	0.002129	0.01985	9	99	PDGFRA,FAP,PLAUR,APOE,SH2B3,THBD,THBS1,SERPINE1,DUSP10
GO: Biological Process	GO:0002474	antigen processing and presentation of peptide antigen via MHC class I			0.0003565	1	0.002129	0.01985	9	99	FCER1G,FCGR1B,CYBB,NCF2,NCF4,SEC24D,ERAP2,CLEC4A,CD36
GO: Biological Process	GO:0031670	cellular response to nutrient			0.0003629	1	0.002165	0.02018	8	79	HMOX1,COL1A1,FOLR2,PPARG,POSTN,CYBB,PTGS2,LEP
GO: Biological Process	GO:0051339	regulation of lyase activity			0.0003737	1	0.002228	0.02077	16	270	ABCA1,ADGRE2,ADCY7,CCR2,ADORA2B,CXCL9,PLN,GPR65,FPR1,MARCO,PTGDR,GNA15,RGS1,RGS2,EDNRA,TIMP2
GO: Biological Process	GO:0045667	regulation of osteoblast differentiation			0.0003766	1	0.002241	0.02089	11	144	CEBPB,TCIRG1,TWIST1,AHR,AREG,IGF1,CCN1,IL6,RASSF2,CCN4,GREM1
GO: Biological Process	GO:0032355	response to estradiol			0.0003766	1	0.002241	0.02089	11	144	MMP2,COL1A1,ANXA1,AREG,POSTN,IL10,PTGS2,GRN,ARPC1B,LEP,CD38
GO: Biological Process	GO:0071241	cellular response to inorganic substance			0.0003843	1	0.002285	0.0213	15	244	SERPINF1,HMOX1,ADCY7,FABP4,MMP9,ALOX5AP,FN1,PPARG,FAS,CYBB,LGMN,PTGS2,TIGAR,MCOLN1,THBS1
GO: Biological Process	GO:0032715	negative regulation of interleukin-6 production			0.0003918	1	0.002326	0.02168	7	61	IL10,PTPN22,CD84,TLR4,IRAK3,TNFAIP3,NCKAP1L
GO: Biological Process	GO:0030041	actin filament polymerization			0.0003919	1	0.002326	0.02168	13	193	AIF1,CCL11,ICAM1,GMFG,GAS7,PYCARD,CAPG,ARPC1B,CORO1A,TLR2,HCK,HCLS1,NCKAP1L
GO: Biological Process	GO:0050856	regulation of T cell receptor signaling pathway			0.0003985	1	0.002358	0.02198	6	44	CD300A,ADA,PTPN22,TRAT1,LILRB4,LGALS3
GO: Biological Process	GO:0030890	positive regulation of B cell proliferation			0.0003985	1	0.002358	0.02198	6	44	ADA,PTPRC,GPR183,CD38,TLR4,NCKAP1L
GO: Biological Process	GO:1904037	positive regulation of epithelial cell apoptotic process			0.0003985	1	0.002358	0.02198	6	44	CCL2,SFRP4,RGCC,IL6,ITGA4,THBS1
GO: Biological Process	GO:0001783	B cell apoptotic process			0.000402	1	0.002365	0.02205	5	29	ADA,IL10,BTK,CD44,LYN
GO: Biological Process	GO:0050855	regulation of B cell receptor signaling pathway			0.000402	1	0.002365	0.02205	5	29	CD300A,FCGR2B,LPXN,PTPN22,LYN
GO: Biological Process	GO:1901623	regulation of lymphocyte chemotaxis			0.000402	1	0.002365	0.02205	5	29	CCR2,CCL2,CCL4,CCL5,CCL7
GO: Biological Process	GO:0042832	defense response to protozoan			0.000402	1	0.002365	0.02205	5	29	CLEC7A,IRF8,IL6,IL10,GBP2
GO: Biological Process	GO:0034369	plasma lipoprotein particle remodeling			0.000402	1	0.002365	0.02205	5	29	PLTP,APOC1,APOE,ABCG1,PLA2G7
GO: Biological Process	GO:0034368	protein-lipid complex remodeling			0.000402	1	0.002365	0.02205	5	29	PLTP,APOC1,APOE,ABCG1,PLA2G7
GO: Biological Process	GO:0048016	inositol phosphate-mediated signaling			0.0004047	1	0.002379	0.02218	12	169	HRH1,GPR65,LMCD1,FPR1,FPR3,IGF1,CXCR2,MYO5A,C3AR1,GNA15,C5AR1,EDNRA
GO: Biological Process	GO:2000241	regulation of reproductive process			0.0004118	1	0.002418	0.02254	13	194	SERPINF1,ADA,MMP12,ARHGDIB,IGF1,INHBA,PTAFR,STK4,SULF1,NUPR1,ZFPM2,TIMP1,LHFPL2
GO: Biological Process	GO:0051701	interaction with host			0.0004223	1	0.002475	0.02307	14	220	CLEC5A,FBLN1,FCN1,CCR5,MMP9,MRC1,ICAM1,CR1,LAMP3,CXCL8,NPC1,LGALS1,CD86,TLR2
GO: Biological Process	GO:0007398	ectoderm development			0.0004223	1	0.002475	0.02307	14	220	MMP2,MMP9,COL5A1,COL5A2,COL8A1,FN1,IL1RN,IL10,INHBA,GATA6,ITGA4,ITGAM,ITGB2,TNFAIP3
GO: Biological Process	GO:0001912	positive regulation of leukocyte mediated cytotoxicity			0.0004334	1	0.002538	0.02366	7	62	TYROBP,MICB,CCL2,VAV1,ITGAM,PTPRC,CRTAM
GO: Biological Process	GO:0043523	regulation of neuron apoptotic process			0.0004393	1	0.00257	0.02396	16	274	CEBPB,HMOX1,TYROBP,CCL2,APOE,FAS,CTSZ,LGMN,NAIP,NCF2,ITGAM,KCNMA1,C5AR1,GRN,NUPR1,CORO1A
GO: Biological Process	GO:0048010	vascular endothelial growth factor receptor signaling pathway			0.000445	1	0.002601	0.02424	9	102	CCL2,VAV1,CYBB,NCF2,NCF4,NRP2,SULF1,EMILIN1,NCKAP1L
GO: Biological Process	GO:0019233	sensory perception of pain			0.0004491	1	0.002622	0.02444	11	147	FABP5,CCR2,CCL2,ALOX5,IL1RN,CTSS,IL10,PTAFR,PTGS2,EDNRA,TLR4
GO: Biological Process	GO:0042036	negative regulation of cytokine biosynthetic process			0.0004513	1	0.002624	0.02446	6	45	TYROBP,IL6,IL10,INHBA,LILRB1,PTPRC
GO: Biological Process	GO:0001821	histamine secretion			0.0004523	1	0.002624	0.02446	4	17	ADA,BTK,EDNRA,LYN
GO: Biological Process	GO:0071285	cellular response to lithium ion			0.0004523	1	0.002624	0.02446	4	17	ADCY7,FABP4,PPARG,FAS
GO: Biological Process	GO:0045064	T-helper 2 cell differentiation			0.0004523	1	0.002624	0.02446	4	17	ANXA1,IL6,NLRP3,CD86
GO: Biological Process	GO:0034435	cholesterol esterification			0.0004523	1	0.002624	0.02446	4	17	APOC1,APOE,ABCG1,SOAT1
GO: Biological Process	GO:0034434	sterol esterification			0.0004523	1	0.002624	0.02446	4	17	APOC1,APOE,ABCG1,SOAT1
GO: Biological Process	GO:0034433	steroid esterification			0.0004523	1	0.002624	0.02446	4	17	APOC1,APOE,ABCG1,SOAT1
GO: Biological Process	GO:0071363	cellular response to growth factor stimulus			0.0004575	1	0.002652	0.02472	32	763	PDGFRA,TWIST1,FBN1,CCL2,FGF7,CCL5,COL1A1,COL1A2,COL3A1,SFRP4,COMP,ANXA1,POSTN,CCN1,IL6,CXCL8,IL10,LGMN,ASPN,GATA6,DCN,NRP2,SULF1,EMILIN1,CORO1A,THBS1,EGR3,LOX,SERPINE1,CD44,GREM1,TNFRSF1B
GO: Biological Process	GO:0008154	actin polymerization or depolymerization			0.0004623	1	0.002678	0.02496	14	222	AIF1,CCL11,PLEK,ICAM1,GMFG,GAS7,PYCARD,CAPG,ARPC1B,CORO1A,TLR2,HCK,HCLS1,NCKAP1L
GO: Biological Process	GO:0007507	heart development			0.0004714	1	0.002728	0.02542	30	699	PDGFRA,TWIST1,FBN1,BASP1,AHR,COL14A1,MMP2,MMP9,PLN,COL3A1,COL5A1,PPARG,IGF1,CCN1,VCAN,ADAP2,GATA6,ITGA4,NRP2,STK4,CCN4,PDLIM3,EMILIN1,RGS2,EDNRA,ZFPM2,THBS1,LOX,GREM1,TNFRSF1B
GO: Biological Process	GO:1904994	regulation of leukocyte adhesion to vascular endothelial cell			0.0004737	1	0.002733	0.02548	5	30	CCR2,ICAM1,ITGA4,PTAFR,ITGB2
GO: Biological Process	GO:0034367	protein-containing complex remodeling			0.0004737	1	0.002733	0.02548	5	30	PLTP,APOC1,APOE,ABCG1,PLA2G7
GO: Biological Process	GO:1903010	regulation of bone development			0.0004737	1	0.002733	0.02548	5	30	TYROBP,FBN1,LILRB1,LOX,GREM1
GO: Biological Process	GO:0014009	glial cell proliferation			0.0004784	1	0.002758	0.0257	7	63	FAS,AREG,IGF1,IL6,IL33,TREM2,LYN
GO: Biological Process	GO:0072330	monocarboxylic acid biosynthetic process			0.000496	1	0.002847	0.02654	15	250	FABP5,ALDH1A3,ALOX5,ALOX5AP,ANXA1,APOC1,SLC1A3,VCAN,MYO5A,DCN,PTGIS,PTGS2,SDS,TBXAS1,DHRS9
GO: Biological Process	GO:0032386	regulation of intracellular transport			0.000502	1	0.002847	0.02654	20	391	CD300A,HMOX1,ADGRE2,ADORA2B,FCER1G,CCL2,FGR,PLN,MX2,PTPN22,ITGAM,ITGB2,PTGS2,CD84,RAC2,LCP1,LEP,CD36,LYN,HCLS1
GO: Biological Process	GO:1902567	negative regulation of eosinophil activation			0.0005025	1	0.002847	0.02654	2	2	CD300A,CCR2
GO: Biological Process	GO:0016046	detection of fungus			0.0005025	1	0.002847	0.02654	2	2	CLEC7A,TLR4
GO: Biological Process	GO:2000471	regulation of hematopoietic stem cell migration			0.0005025	1	0.002847	0.02654	2	2	CCR2,PTPRC
GO: Biological Process	GO:2000458	regulation of astrocyte chemotaxis			0.0005025	1	0.002847	0.02654	2	2	CCR2,GPR183
GO: Biological Process	GO:0071306	cellular response to vitamin E			0.0005025	1	0.002847	0.02654	2	2	COL1A1,PPARG
GO: Biological Process	GO:0042495	detection of triacyl bacterial lipopeptide			0.0005025	1	0.002847	0.02654	2	2	TLR1,TLR2
GO: Biological Process	GO:0090291	negative regulation of osteoclast proliferation			0.0005025	1	0.002847	0.02654	2	2	TNFAIP3,GREM1
GO: Biological Process	GO:0090265	positive regulation of immune complex clearance by monocytes and macrophages			0.0005025	1	0.002847	0.02654	2	2	CCR2,CCL2
GO: Biological Process	GO:0070488	neutrophil aggregation			0.0005025	1	0.002847	0.02654	2	2	S100A8,S100A9
GO: Biological Process	GO:1904235	regulation of substrate-dependent cell migration, cell attachment to substrate			0.0005025	1	0.002847	0.02654	2	2	FBLN1,FN1
GO: Biological Process	GO:1904237	positive regulation of substrate-dependent cell migration, cell attachment to substrate			0.0005025	1	0.002847	0.02654	2	2	FBLN1,FN1
GO: Biological Process	GO:0110090	positive regulation of hippocampal neuron apoptotic process			0.0005025	1	0.002847	0.02654	2	2	TYROBP,ITGAM
GO: Biological Process	GO:0035700	astrocyte chemotaxis			0.0005025	1	0.002847	0.02654	2	2	CCR2,GPR183
GO: Biological Process	GO:0032499	detection of peptidoglycan			0.0005025	1	0.002847	0.02654	2	2	NOD2,TREM2
GO: Biological Process	GO:2000473	positive regulation of hematopoietic stem cell migration			0.0005025	1	0.002847	0.02654	2	2	CCR2,PTPRC
GO: Biological Process	GO:0002588	positive regulation of antigen processing and presentation of peptide antigen via MHC class II			0.0005025	1	0.002847	0.02654	2	2	PYCARD,TREM2
GO: Biological Process	GO:0002582	positive regulation of antigen processing and presentation of peptide or polysaccharide antigen via MHC class II			0.0005025	1	0.002847	0.02654	2	2	PYCARD,TREM2
GO: Biological Process	GO:0009268	response to pH			0.0005094	1	0.002881	0.02685	6	46	SERPINF1,GPR65,CTSS,LGMN,KCNMA1,MCOLN1
GO: Biological Process	GO:0007202	activation of phospholipase C activity			0.0005094	1	0.002881	0.02685	10	126	HRH1,GPR65,FPR1,FPR3,CXCR2,ITK,C3AR1,GNA15,C5AR1,EDNRA
GO: Biological Process	GO:0048017	inositol lipid-mediated signaling			0.0005245	1	0.002964	0.02763	13	199	PDGFRA,TWIST1,PIK3CG,CCL5,FGR,IGF1,ADAP2,PTAFR,DCN,LEP,CD28,LYN,HCLS1
GO: Biological Process	GO:0008347	glial cell migration			0.000527	1	0.002975	0.02773	7	64	CCR2,CCL2,FN1,FAS,VCAN,GPR183,TREM2
GO: Biological Process	GO:0030324	lung development			0.0005285	1	0.002981	0.02779	14	225	PDGFRA,CHI3L1,ADA,MGP,FGF7,HSD11B1,IGF1,CTSD,CTSZ,GATA6,CRISPLD2,ZFPM2,LIPA,LOX
GO: Biological Process	GO:0050688	regulation of defense response to virus			0.0005508	1	0.003101	0.02891	8	84	MICB,CCL5,MMP12,AIM2,PYCARD,PTPN22,LILRB1,TNFAIP3
GO: Biological Process	GO:0030101	natural killer cell activation			0.0005508	1	0.003101	0.02891	9	105	TYROBP,MICB,MERTK,SLAMF7,PTPN22,ITGB2,PTPRC,LEP,CORO1A
GO: Biological Process	GO:0002230	positive regulation of defense response to virus by host			0.0005546	1	0.003103	0.02892	5	31	CCL5,AIM2,PYCARD,PTPN22,LILRB1
GO: Biological Process	GO:0010743	regulation of macrophage derived foam cell differentiation			0.0005546	1	0.003103	0.02892	5	31	ABCA1,PPARG,MSR1,ABCG1,CD36
GO: Biological Process	GO:0043032	positive regulation of macrophage activation			0.0005546	1	0.003103	0.02892	5	31	IL10,IL33,THBS1,TLR4,TREM2
GO: Biological Process	GO:0050859	negative regulation of B cell receptor signaling pathway			0.000559	1	0.003103	0.02892	3	8	CD300A,FCGR2B,LPXN
GO: Biological Process	GO:0043313	regulation of neutrophil degranulation			0.000559	1	0.003103	0.02892	3	8	PTAFR,ITGAM,ITGB2
GO: Biological Process	GO:0002885	positive regulation of hypersensitivity			0.000559	1	0.003103	0.02892	3	8	FCER1G,BTK,C3
GO: Biological Process	GO:2000427	positive regulation of apoptotic cell clearance			0.000559	1	0.003103	0.02892	3	8	CCL2,C3,TREM2
GO: Biological Process	GO:0034238	macrophage fusion			0.000559	1	0.003103	0.02892	3	8	TYROBP,CD44,TREM2
GO: Biological Process	GO:1903979	negative regulation of microglial cell activation			0.000559	1	0.003103	0.02892	3	8	PPARG,PTPRC,GRN
GO: Biological Process	GO:0034154	toll-like receptor 7 signaling pathway			0.000559	1	0.003103	0.02892	3	8	TLR7,RSAD2,PTPN22
GO: Biological Process	GO:0034127	regulation of MyD88-independent toll-like receptor signaling pathway			0.000559	1	0.003103	0.02892	3	8	LY96,CD14,TLR4
GO: Biological Process	GO:0051045	negative regulation of membrane protein ectodomain proteolysis			0.000559	1	0.003103	0.02892	3	8	IL10,TIMP1,TIMP2
GO: Biological Process	GO:0010887	negative regulation of cholesterol storage			0.000559	1	0.003103	0.02892	3	8	ABCA1,PPARG,ABCG1
GO: Biological Process	GO:1904415	regulation of xenophagy			0.000559	1	0.003103	0.02892	3	8	RIPK2,NOD2,TLR2
GO: Biological Process	GO:1904417	positive regulation of xenophagy			0.000559	1	0.003103	0.02892	3	8	RIPK2,NOD2,TLR2
GO: Biological Process	GO:0045630	positive regulation of T-helper 2 cell differentiation			0.000559	1	0.003103	0.02892	3	8	IL6,NLRP3,CD86
GO: Biological Process	GO:0150078	positive regulation of neuroinflammatory response			0.0005713	1	0.003163	0.02948	4	18	IL6,IL33,NUPR1,TREM2
GO: Biological Process	GO:0034375	high-density lipoprotein particle remodeling			0.0005713	1	0.003163	0.02948	4	18	PLTP,APOC1,APOE,ABCG1
GO: Biological Process	GO:0090196	regulation of chemokine secretion			0.0005713	1	0.003163	0.02948	4	18	AIF1,POSTN,PYCARD,IL33
GO: Biological Process	GO:1905952	regulation of lipid localization			0.0005828	1	0.003224	0.03005	12	176	ABCA1,PLTP,APOC1,APOE,PPARG,MSR1,ABCG1,IL6,C3,LEP,THBS1,CD36
GO: Biological Process	GO:0032147	activation of protein kinase activity			0.0005931	1	0.003277	0.03055	21	426	CD300A,CHI3L1,ADCY7,ADORA2B,CCL5,MAP3K8,FPR1,RGCC,IGF1,RIPK2,NOD2,STK4,PTPRC,C5AR1,LEP,EDNRA,THBS1,TLR1,TLR4,GREM1,NCKAP1L
GO: Biological Process	GO:0043525	positive regulation of neuron apoptotic process			0.0005964	1	0.00329	0.03067	8	85	TYROBP,FAS,CTSZ,NCF2,ITGAM,KCNMA1,GRN,NUPR1
GO: Biological Process	GO:0030500	regulation of bone mineralization			0.0005964	1	0.00329	0.03067	8	85	TWIST1,MGP,CCR1,COMP,BMP2K,CCN1,SRGN,GREM1
GO: Biological Process	GO:0001659	temperature homeostasis			0.000613	1	0.003376	0.03147	12	177	CEBPB,PLAC8,FABP4,FABP5,CCR2,UCP2,CCL5,IL1RN,PTGS2,LEP,CD36,TLR4
GO: Biological Process	GO:0046718	viral entry into host cell			0.0006132	1	0.003376	0.03147	10	129	CLEC5A,FCN1,CCR5,MRC1,ICAM1,CR1,LAMP3,NPC1,LGALS1,CD86
GO: Biological Process	GO:0030323	respiratory tube development			0.0006291	1	0.003461	0.03226	14	229	PDGFRA,CHI3L1,ADA,MGP,FGF7,HSD11B1,IGF1,CTSD,CTSZ,GATA6,CRISPLD2,ZFPM2,LIPA,LOX
GO: Biological Process	GO:0032970	regulation of actin filament-based process			0.0006299	1	0.003463	0.03228	21	428	PDGFRA,ACTA2,CCL11,FGR,PLEK,PLN,GPR65,ICAM1,RGCC,GMFG,RND3,ARHGDIB,PYCARD,MYO1F,CAPG,ARPC1B,CORO1A,TLR2,HCK,HCLS1,NCKAP1L
GO: Biological Process	GO:2000117	negative regulation of cysteine-type endopeptidase activity			0.0006322	1	0.003466	0.03231	9	107	PLAUR,MMP9,IGF1,LAMP3,IL6,NAIP,PTGS2,THBS1,CD44
GO: Biological Process	GO:0007200	phospholipase C-activating G protein-coupled receptor signaling pathway			0.0006322	1	0.003466	0.03231	9	107	HRH1,GPR65,FPR1,FPR3,CXCR2,C3AR1,GNA15,C5AR1,EDNRA
GO: Biological Process	GO:0045639	positive regulation of myeloid cell differentiation			0.0006322	1	0.003466	0.03231	9	107	EVI2B,TYROBP,CCR1,CCL5,INHBA,LEP,TREM2,HCLS1,NCKAP1L
GO: Biological Process	GO:0032371	regulation of sterol transport			0.0006361	1	0.003484	0.03248	7	66	ABCA1,PLTP,APOC1,APOE,PPARG,ABCG1,LEP
GO: Biological Process	GO:1900015	regulation of cytokine production involved in inflammatory response			0.0006429	1	0.003519	0.0328	6	48	CLEC7A,ADCY7,PYCARD,NOD2,LEP,TLR4
GO: Biological Process	GO:0001516	prostaglandin biosynthetic process			0.0006455	1	0.003524	0.03284	5	32	FABP5,ANXA1,PTGIS,PTGS2,TBXAS1
GO: Biological Process	GO:0001562	response to protozoan			0.0006455	1	0.003524	0.03284	5	32	CLEC7A,IRF8,IL6,IL10,GBP2
GO: Biological Process	GO:0046457	prostanoid biosynthetic process			0.0006455	1	0.003524	0.03284	5	32	FABP5,ANXA1,PTGIS,PTGS2,TBXAS1
GO: Biological Process	GO:0060485	mesenchyme development			0.0006475	1	0.003531	0.03291	17	312	CORO1C,ACTA2,ACTG2,TWIST1,BASP1,PLAUR,COL1A1,FN1,RGCC,IL6,ITGA4,ZEB2,NRP2,EDNRA,ZFPM2,THBS1,GREM1
GO: Biological Process	GO:0033673	negative regulation of kinase activity			0.0006481	1	0.003531	0.03292	16	284	CD300A,CORO1C,FABP4,GMFG,APOE,PYCARD,IL6,PTPN22,PTPRC,TIGAR,SH2B3,RGS2,IRAK3,DUSP10,TNFAIP3,LYN
GO: Biological Process	GO:0031400	negative regulation of protein modification process			0.0006605	1	0.00359	0.03347	29	681	CD300A,CORO1C,FABP4,TWIST1,FBLN1,SFRP4,BAG2,GMFG,APOE,IGF1,PYCARD,IL6,PHACTR1,RASSF2,PTPN22,SAMSN1,PTPRC,NIBAN1,SH2B3,EMILIN1,RGS2,LGALS3,TLR4,IRAK3,DUSP10,TNFAIP3,GREM1,LYN,NCKAP1L
GO: Biological Process	GO:0001704	formation of primary germ layer			0.0006623	1	0.00359	0.03347	13	204	MMP2,MMP9,COL5A1,COL5A2,COL8A1,FN1,IL1RN,IL10,INHBA,GATA6,ITGA4,ITGB2,TNFAIP3
GO: Biological Process	GO:0001705	ectoderm formation			0.0006623	1	0.00359	0.03347	13	204	MMP2,MMP9,COL5A1,COL5A2,COL8A1,FN1,IL1RN,IL10,INHBA,GATA6,ITGA4,ITGB2,TNFAIP3
GO: Biological Process	GO:0001706	endoderm formation			0.0006623	1	0.00359	0.03347	13	204	MMP2,MMP9,COL5A1,COL5A2,COL8A1,FN1,IL1RN,IL10,INHBA,GATA6,ITGA4,ITGB2,TNFAIP3
GO: Biological Process	GO:0001707	mesoderm formation			0.0006623	1	0.00359	0.03347	13	204	MMP2,MMP9,COL5A1,COL5A2,COL8A1,FN1,IL1RN,IL10,INHBA,GATA6,ITGA4,ITGB2,TNFAIP3
GO: Biological Process	GO:0007369	gastrulation			0.0006623	1	0.00359	0.03347	13	204	MMP2,MMP9,COL5A1,COL5A2,COL8A1,FN1,IL1RN,IL10,INHBA,GATA6,ITGA4,ITGB2,TNFAIP3
GO: Biological Process	GO:0034763	negative regulation of transmembrane transport			0.0006644	1	0.003599	0.03354	11	154	FABP5,TWIST1,KCNE4,CLIC2,AHR,MMP9,PLN,GEM,RGS2,LEP,THBS1
GO: Biological Process	GO:0046777	protein autophosphorylation			0.0006871	1	0.003718	0.03466	15	258	PDGFRA,STK17B,GPNMB,FGR,SLA,RASSF2,ITK,STK4,PTPRC,BTK,RAP2B,IRAK3,GREM1,LYN,HCK
GO: Biological Process	GO:0043407	negative regulation of MAP kinase activity			0.0006969	1	0.003762	0.03507	8	87	CD300A,APOE,PTPN22,SH2B3,RGS2,IRAK3,DUSP10,LYN
GO: Biological Process	GO:0071260	cellular response to mechanical stimulus			0.0006969	1	0.003762	0.03507	8	87	TLR7,COL1A1,FAS,PIEZO2,PTGS2,CASP1,EDNRA,TLR4
GO: Biological Process	GO:1905953	negative regulation of lipid localization			0.000697	1	0.003762	0.03507	7	67	ABCA1,APOC1,PPARG,ABCG1,IL6,LEP,THBS1
GO: Biological Process	GO:0032956	regulation of actin cytoskeleton organization			0.0007004	1	0.003777	0.03521	19	372	PDGFRA,CCL11,FGR,PLEK,GPR65,ICAM1,RGCC,GMFG,RND3,ARHGDIB,PYCARD,MYO1F,CAPG,ARPC1B,CORO1A,TLR2,HCK,HCLS1,NCKAP1L
GO: Biological Process	GO:0046425	regulation of receptor signaling pathway via JAK-STAT			0.0007013	1	0.003779	0.03522	11	155	CD300A,CCL5,IGF1,IL6,IL10,IL10RA,PTPRC,SH2B3,LEP,LYN,HCLS1
GO: Biological Process	GO:0051608	histamine transport			0.0007111	1	0.003825	0.03565	4	19	ADA,BTK,EDNRA,LYN
GO: Biological Process	GO:0046851	negative regulation of bone remodeling			0.0007111	1	0.003825	0.03565	4	19	IL6,CD38,TNFAIP3,GREM1
GO: Biological Process	GO:0007188	adenylate cyclase-modulating G protein-coupled receptor signaling pathway			0.0007148	1	0.003842	0.03581	14	232	ABCA1,ADGRE2,ADCY7,ADORA2B,CXCL9,PLN,GPR65,FPR1,MARCO,PTGDR,GNA15,RGS1,RGS2,EDNRA
GO: Biological Process	GO:2000404	regulation of T cell migration			0.0007191	1	0.003856	0.03594	6	49	CCR2,AIF1,CCL5,CCL20,PYCARD,ITGA4
GO: Biological Process	GO:0002707	negative regulation of lymphocyte mediated immunity			0.0007191	1	0.003856	0.03594	6	49	FCGR2B,CR1,IL7R,LILRB1,NOD2,PTPRC
GO: Biological Process	GO:0030001	metal ion transport			0.0007193	1	0.003856	0.03594	39	1022	LILRB2,TCIRG1,KCNE4,CLIC2,PIK3CG,CXCL9,AHR,HRH1,CCL2,CCR1,CCL4,CCL5,CCR5,CCL8,PLN,STEAP1,SLC31A2,ICAM1,SLC1A3,IGF1,MYO5A,FXYD5,PTPN22,LILRB1,GEM,PTGS2,CD84,PTPRC,KCNMA1,MCUB,MCOLN1,EDNRA,LGALS3,CORO1A,CD33,SERPINE1,TREM2,LYN,SLC38A6
GO: Biological Process	GO:0048332	mesoderm morphogenesis			0.0007254	1	0.003885	0.03621	13	206	MMP2,MMP9,COL5A1,COL5A2,COL8A1,FN1,IL1RN,IL10,INHBA,GATA6,ITGA4,ITGB2,TNFAIP3
GO: Biological Process	GO:0071295	cellular response to vitamin			0.000747	1	0.003998	0.03726	5	33	COL1A1,FOLR2,PPARG,POSTN,LEP
GO: Biological Process	GO:2001235	positive regulation of apoptotic signaling pathway			0.0007588	1	0.004057	0.03782	13	207	S100A8,S100A9,PLAUR,SRPX,MMP9,FAS,PYCARD,INHBA,STK4,PTPRC,NUPR1,THBS1,GZMB
GO: Biological Process	GO:0006469	negative regulation of protein kinase activity			0.0007733	1	0.004131	0.03851	15	261	CD300A,CORO1C,FABP4,GMFG,APOE,PYCARD,IL6,PTPN22,PTPRC,SH2B3,RGS2,IRAK3,DUSP10,TNFAIP3,LYN
GO: Biological Process	GO:0007267	cell-cell signaling			0.0007948	1	0.004243	0.03955	63	1899	EREG,LILRB2,TCIRG1,FABP5,CCR2,S100A8,ADORA2B,S100A9,TYROBP,UCP2,CXCL9,HRH1,CCL2,FGF7,CCR1,CCL4,CCL5,CCL7,CCR5,CCL8,GPNMB,CCL18,CCL20,MERTK,MMP9,COL1A1,SFRP4,ANXA1,APOE,PPARG,SLC1A3,AREG,SRGN,IL1RN,IL6,LGMN,MYO5A,INHBA,ITGAM,ITGB2,PTGS2,ZEB2,STK4,CCN4,SULF1,BTK,KCNMA1,C1QA,C3,GNA15,LEP,MCTP1,EGR2,EGR3,CD33,CD38,TLR2,CD44,TNFAIP3,GREM1,TNFAIP6,CYB5R4,LYN
GO: Biological Process	GO:0014013	regulation of gliogenesis			0.0008221	1	0.004347	0.04052	11	158	CCR2,PPARG,FAS,IGF1,IL6,GPR183,TLR2,TREM2,DUSP10,TNFRSF1B,LYN
GO: Biological Process	GO:0031623	receptor internalization			0.0008246	1	0.004347	0.04052	10	134	FCER1G,SFRP4,CXCL8,CXCR2,ITGB2,LILRB1,ACKR3,RAB31,CD36,GREM1
GO: Biological Process	GO:0043615	astrocyte cell migration			0.0008248	1	0.004347	0.04052	3	9	CCR2,CCL2,GPR183
GO: Biological Process	GO:0048251	elastic fiber assembly			0.0008248	1	0.004347	0.04052	3	9	MFAP4,EMILIN1,LOX
GO: Biological Process	GO:0071225	cellular response to muramyl dipeptide			0.0008248	1	0.004347	0.04052	3	9	RIPK2,PTPN22,NOD2
GO: Biological Process	GO:0033007	negative regulation of mast cell activation involved in immune response			0.0008248	1	0.004347	0.04052	3	9	CD300A,HMOX1,CD84
GO: Biological Process	GO:0033029	regulation of neutrophil apoptotic process			0.0008248	1	0.004347	0.04052	3	9	ANXA1,CXCR2,CD44
GO: Biological Process	GO:0035360	positive regulation of peroxisome proliferator activated receptor signaling pathway			0.0008248	1	0.004347	0.04052	3	9	FABP5,PTGIS,LEP
GO: Biological Process	GO:0090270	regulation of fibroblast growth factor production			0.0008248	1	0.004347	0.04052	3	9	AIF1,RGCC,PTGS2
GO: Biological Process	GO:0090269	fibroblast growth factor production			0.0008248	1	0.004347	0.04052	3	9	AIF1,RGCC,PTGS2
GO: Biological Process	GO:0010912	positive regulation of isomerase activity			0.0008248	1	0.004347	0.04052	3	9	ITGAM,ITGB2,NOD2
GO: Biological Process	GO:0010911	regulation of isomerase activity			0.0008248	1	0.004347	0.04052	3	9	ITGAM,ITGB2,NOD2
GO: Biological Process	GO:0045586	regulation of gamma-delta T cell differentiation			0.0008248	1	0.004347	0.04052	3	9	PTPRC,EGR3,NCKAP1L
GO: Biological Process	GO:0002578	negative regulation of antigen processing and presentation			0.0008248	1	0.004347	0.04052	3	9	LILRB2,FCGR2B,THBS1
GO: Biological Process	GO:0045627	positive regulation of T-helper 1 cell differentiation			0.0008248	1	0.004347	0.04052	3	9	CCR2,ANXA1,RIPK2
GO: Biological Process	GO:2000242	negative regulation of reproductive process			0.0008325	1	0.004384	0.04087	7	69	SERPINF1,ADA,ARHGDIB,IGF1,SULF1,ZFPM2,TIMP1
GO: Biological Process	GO:2001234	negative regulation of apoptotic signaling pathway			0.0008358	1	0.004398	0.04099	15	263	HMOX1,PLAUR,MMP9,ICAM1,FAS,IGF1,BCL2A1,PTGS2,ACKR3,SCG2,LGALS3,THBS1,SERPINE1,CD44,TNFAIP3
GO: Biological Process	GO:0010595	positive regulation of endothelial cell migration			0.0008733	1	0.00458	0.04269	10	135	HMOX1,ADORA2B,ANXA1,IGF1,LGMN,PTGS2,NRP2,SRPX2,GRN,THBS1
GO: Biological Process	GO:0032930	positive regulation of superoxide anion generation			0.0008734	1	0.00458	0.04269	4	20	CLEC7A,TYROBP,ITGAM,ITGB2
GO: Biological Process	GO:0090195	chemokine secretion			0.0008734	1	0.00458	0.04269	4	20	AIF1,POSTN,PYCARD,IL33
GO: Biological Process	GO:0032495	response to muramyl dipeptide			0.0008734	1	0.00458	0.04269	4	20	RIPK2,PTPN22,NOD2,TNFAIP3
GO: Biological Process	GO:0017144	drug metabolic process			0.0008817	1	0.00462	0.04306	31	760	NPL,ACP5,CLEC7A,CHIT1,ADA,HRH1,AIF1,NAGK,FOLR2,ICAM1,IGF1,VCAN,IL6,CYBB,IL10,PTGDR,DCN,ITGAM,ADA2,ITGB2,PTGIS,PTGS2,SDS,RAC2,PLA2G7,NUPR1,CD36,TLR2,DHRS9,TLR4,TREM2
GO: Biological Process	GO:0002534	cytokine production involved in inflammatory response			0.0008923	1	0.004671	0.04354	6	51	CLEC7A,ADCY7,PYCARD,NOD2,LEP,TLR4
GO: Biological Process	GO:0001655	urogenital system development			0.0009019	1	0.004718	0.04398	19	380	PDGFRA,SERPINF1,ACTA2,FBN1,BASP1,AHR,PLAUR,MMP2,MMP9,ANXA1,IGF1,VCAN,CXCR2,DCN,SULF1,C3AR1,EDNRA,CD44,GREM1
GO: Biological Process	GO:0031098	stress-activated protein kinase signaling cascade			0.0009165	1	0.00479	0.04465	18	351	ADORA2B,FCGR2B,SFRP4,MAP3K8,FAS,PYCARD,IL1RN,RASSF2,RIPK2,PTPN22,ZEB2,NOD2,STK4,LEP,TLR4,DUSP10,GREM1,LYN
GO: Biological Process	GO:0032787	monocarboxylic acid metabolic process			0.0009271	1	0.004842	0.04513	29	696	CES1,ME1,FABP4,FABP5,TWIST1,ALDH1A3,ALOX5,ALOX5AP,ANXA1,AOAH,APOC1,PPARG,SLC1A3,IGF1,VCAN,MYO5A,DCN,PTGIS,PTGS2,C3,SDS,NPC1,TBXAS1,TIGAR,NUPR1,LEP,LIPA,CD36,DHRS9
GO: Biological Process	GO:0033077	T cell differentiation in thymus			0.0009387	1	0.004894	0.04562	8	91	HLA-DMA,ADA,FAS,IL7R,PTPRC,DOCK2,EGR3,CD28
GO: Biological Process	GO:0014015	positive regulation of gliogenesis			0.0009387	1	0.004894	0.04562	8	91	CCR2,PPARG,IGF1,IL6,TLR2,TREM2,TNFRSF1B,LYN
GO: Biological Process	GO:0032728	positive regulation of interferon-beta production			0.0009853	1	0.005133	0.04784	5	35	TLR7,RIPK2,PTPN22,TLR2,TLR4
GO: Biological Process	GO:0002637	regulation of immunoglobulin production			0.0009881	1	0.005143	0.04794	7	71	FCGR2B,IL6,IL10,PTPRC,IL33,CD28,TNFAIP3
GO: Biological Process	GO:1902106	negative regulation of leukocyte differentiation			0.0009979	1	0.005189	0.04837	9	114	FBN1,FCGR2B,ANXA1,INHBA,LILRB1,LILRB4,TLR4,CD44,LYN
GO: Biological Process	GO:0008625	extrinsic apoptotic signaling pathway via death domain receptors			0.001009	1	0.005241	0.04885	8	92	HMOX1,ICAM1,FAS,STK4,LGALS3,THBS1,SERPINE1,TNFAIP3
GO: Biological Process	GO:0014065	phosphatidylinositol 3-kinase signaling			0.001009	1	0.005241	0.04886	11	162	PDGFRA,TWIST1,PIK3CG,CCL5,FGR,IGF1,DCN,LEP,CD28,LYN,HCLS1
GO: Biological Process	GO:0031330	negative regulation of cellular catabolic process			0.001011	1	0.005245	0.04889	15	268	HMOX1,PIK3CG,APOC1,LAMP3,IL10,IL10RA,PTPN22,NPC1,TIGAR,NUPR1,LEP,TIMP1,TIMP2,TREM2,TNFAIP3
GO: Biological Process	GO:1901653	cellular response to peptide			0.001017	1	0.005271	0.04914	20	414	TCIRG1,ADCY7,FBN1,FCGR2B,ICAM1,PPARG,IGF1,LGMN,MYO5A,RIPK2,PTPN22,ITGA4,NOD2,PTPRE,RAB31,LEP,CD36,TLR4,TREM2,LYN
GO: Biological Process	GO:0097237	cellular response to toxic substance			0.001049	1	0.005426	0.05058	15	269	HMOX1,ADCY7,S100A8,S100A9,CLIC2,CCL7,ALOX5AP,ANXA1,APOE,IL6,CYBB,IL10,PTGS2,CD36,TNFAIP3
GO: Biological Process	GO:0070302	regulation of stress-activated protein kinase signaling cascade			0.001049	1	0.005426	0.05058	15	269	FCGR2B,SFRP4,FAS,PYCARD,IL1RN,RASSF2,RIPK2,PTPN22,ZEB2,NOD2,LEP,TLR4,DUSP10,GREM1,LYN
GO: Biological Process	GO:0045137	development of primary sexual characteristics			0.001049	1	0.005426	0.05058	15	269	EREG,CEBPB,PDGFRA,BASP1,AHR,FGF7,MMP2,ICAM1,INHBA,GATA6,NUPR1,LEP,ZFPM2,SERPINE1,LHFPL2
GO: Biological Process	GO:0032966	negative regulation of collagen biosynthetic process			0.00106	1	0.005464	0.05093	4	21	ADORA2B,PPARG,IL6,EMILIN1
GO: Biological Process	GO:0060192	negative regulation of lipase activity			0.00106	1	0.005464	0.05093	4	21	PLEK,ANXA1,APOC1,RGS2
GO: Biological Process	GO:0032693	negative regulation of interleukin-10 production			0.00106	1	0.005464	0.05093	4	21	TYROBP,FCGR2B,LILRB1,CD84
GO: Biological Process	GO:0002643	regulation of tolerance induction			0.00106	1	0.005464	0.05093	4	21	LILRB2,CLC,CD86,IRAK3
GO: Biological Process	GO:0051384	response to glucocorticoid			0.001061	1	0.005466	0.05095	11	163	SERPINF1,AIF1,ANXA1,ICAM1,FAS,AREG,IL1RN,IL6,IL10,PTAFR,PTGS2
GO: Biological Process	GO:0043547	positive regulation of GTPase activity			0.001078	1	0.005546	0.0517	20	416	CORO1C,CCL2,CCL4,CCL5,CCL7,CCL8,CCL11,CCL18,CCL20,VAV1,GPR65,ICAM1,DOCK10,ARHGDIB,ADAP2,ARHGAP25,DOCK2,RGS1,RGS2,NCKAP1L
GO: Biological Process	GO:0016525	negative regulation of angiogenesis			0.001089	1	0.005599	0.05219	12	189	SERPINF1,CCR2,CCL2,RGCC,PPARG,DCN,SULF1,EMILIN1,THBS1,THBS2,CD36,SERPINE1
GO: Biological Process	GO:2000108	positive regulation of leukocyte apoptotic process			0.001124	1	0.005758	0.05367	5	36	CCL5,ANXA1,IL10,CD44,LYN
GO: Biological Process	GO:1902991	regulation of amyloid precursor protein catabolic process			0.001124	1	0.005758	0.05367	5	36	SPON1,APOE,ABCG1,IGF1,LYN
GO: Biological Process	GO:0070423	nucleotide-binding oligomerization domain containing signaling pathway			0.001124	1	0.005758	0.05367	5	36	RIPK2,PTPN22,NOD2,TLR4,TNFAIP3
GO: Biological Process	GO:0045932	negative regulation of muscle contraction			0.001124	1	0.005758	0.05367	5	36	ADORA2B,PIK3CG,PTGS2,KCNMA1,RGS2
GO: Biological Process	GO:0009266	response to temperature stimulus			0.00113	1	0.005787	0.05394	15	271	HMOX1,PLAC8,MICB,UCP2,CCL2,HSPA6,TFEC,BAG2,PPARG,IGF1,PTGS2,THBS1,CD14,TLR4,LYN
GO: Biological Process	GO:0008064	regulation of actin polymerization or depolymerization			0.00114	1	0.005826	0.0543	12	190	CCL11,PLEK,ICAM1,GMFG,PYCARD,CAPG,ARPC1B,CORO1A,TLR2,HCK,HCLS1,NCKAP1L
GO: Biological Process	GO:0048754	branching morphogenesis of an epithelial tube			0.00114	1	0.005826	0.0543	12	190	PDGFRA,MGP,AHR,CCL11,AREG,IGF1,CTSD,CTSZ,STK4,EDNRA,CD44,GREM1
GO: Biological Process	GO:0001666	response to hypoxia			0.001151	1	0.005857	0.05459	19	388	HMOX1,ADA,TWIST1,UCP2,MMP2,ICAM1,RGCC,POSTN,CYBB,GATA6,PTGIS,PTGS2,KCNMA1,TIGAR,LEP,EDNRA,THBS1,CD38,TLR2
GO: Biological Process	GO:0043434	response to peptide hormone			0.001152	1	0.005857	0.05459	22	480	EREG,TCIRG1,ADCY7,FBN1,PLN,COL1A1,ANXA1,ICAM1,PPARG,AREG,IGF1,CYBB,IL10,MYO5A,PTGS2,PTPRE,RAB31,LEP,TIMP1,EGR2,TLR2,LYN
GO: Biological Process	GO:0051209	release of sequestered calcium ion into cytosol			0.001154	1	0.005857	0.05459	10	140	CLIC2,CXCL9,CCR5,PLN,MYO5A,PTPRC,MCOLN1,EDNRA,CORO1A,LYN
GO: Biological Process	GO:0002866	positive regulation of acute inflammatory response to antigenic stimulus			0.001159	1	0.005857	0.05459	3	10	FCER1G,BTK,C3
GO: Biological Process	GO:2000425	regulation of apoptotic cell clearance			0.001159	1	0.005857	0.05459	3	10	CCL2,C3,TREM2
GO: Biological Process	GO:0060087	relaxation of vascular associated smooth muscle			0.001159	1	0.005857	0.05459	3	10	ADORA2B,KCNMA1,RGS2
GO: Biological Process	GO:0051918	negative regulation of fibrinolysis			0.001159	1	0.005857	0.05459	3	10	THBD,THBS1,SERPINE1
GO: Biological Process	GO:0070099	regulation of chemokine-mediated signaling pathway			0.001159	1	0.005857	0.05459	3	10	CCL5,SH2B3,TREM2
GO: Biological Process	GO:0002291	T cell activation via T cell receptor contact with antigen bound to MHC molecule on antigen presenting cell			0.001159	1	0.005857	0.05459	3	10	ICAM1,LILRB1,LGALS3
GO: Biological Process	GO:0070424	regulation of nucleotide-binding oligomerization domain containing signaling pathway			0.001159	1	0.005857	0.05459	3	10	PTPN22,TLR4,TNFAIP3
GO: Biological Process	GO:0002158	osteoclast proliferation			0.001159	1	0.005857	0.05459	3	10	TCIRG1,TNFAIP3,GREM1
GO: Biological Process	GO:0010519	negative regulation of phospholipase activity			0.001159	1	0.005857	0.05459	3	10	PLEK,ANXA1,RGS2
GO: Biological Process	GO:1903236	regulation of leukocyte tethering or rolling			0.001159	1	0.005857	0.05459	3	10	CCR2,ITGA4,PTAFR
GO: Biological Process	GO:0002579	positive regulation of antigen processing and presentation			0.001159	1	0.005857	0.05459	3	10	PYCARD,NOD2,TREM2
GO: Biological Process	GO:0050850	positive regulation of calcium-mediated signaling			0.00121	1	0.006111	0.05696	6	54	ADA,CCL4,LMCD1,IGF1,TRAT1,TREM2
GO: Biological Process	GO:1902905	positive regulation of supramolecular fiber organization			0.00122	1	0.006154	0.05736	13	218	CCL11,PLEK,GPR65,ICAM1,RGCC,GMFG,APOE,PYCARD,NAV3,ARPC1B,CORO1A,HCK,NCKAP1L
GO: Biological Process	GO:0071357	cellular response to type I interferon			0.001244	1	0.00626	0.05835	8	95	MMP12,IRF8,SAMHD1,RSAD2,XAF1,MX2,GBP2,OAS2
GO: Biological Process	GO:0060337	type I interferon signaling pathway			0.001244	1	0.00626	0.05835	8	95	MMP12,IRF8,SAMHD1,RSAD2,XAF1,MX2,GBP2,OAS2
GO: Biological Process	GO:0048708	astrocyte differentiation			0.001244	1	0.00626	0.05835	8	95	S100A8,S100A9,IL6,C1QA,C5AR1,GRN,TLR4,TREM2
GO: Biological Process	GO:0001541	ovarian follicle development			0.001263	1	0.006349	0.05918	7	74	EREG,CEBPB,AHR,FGF7,MMP2,ICAM1,INHBA
GO: Biological Process	GO:0050918	positive chemotaxis			0.001263	1	0.006349	0.05918	7	74	FGF7,CCL5,GPNMB,CXCL8,SCG2,LGALS3,CORO1A
GO: Biological Process	GO:0045986	negative regulation of smooth muscle contraction			0.001273	1	0.006361	0.05929	4	22	ADORA2B,PTGS2,KCNMA1,RGS2
GO: Biological Process	GO:0010713	negative regulation of collagen metabolic process			0.001273	1	0.006361	0.05929	4	22	ADORA2B,PPARG,IL6,EMILIN1
GO: Biological Process	GO:0010544	negative regulation of platelet activation			0.001273	1	0.006361	0.05929	4	22	PDGFRA,APOE,SH2B3,THBD
GO: Biological Process	GO:0140131	positive regulation of lymphocyte chemotaxis			0.001273	1	0.006361	0.05929	4	22	CCR2,CCL4,CCL5,CCL7
GO: Biological Process	GO:2000352	negative regulation of endothelial cell apoptotic process			0.001276	1	0.006361	0.05929	5	37	ICAM1,IL10,SCG2,SERPINE1,TNFAIP3
GO: Biological Process	GO:0090505	epiboly involved in wound healing			0.001276	1	0.006361	0.05929	5	37	MMP12,COL5A1,CCN1,LCP1,CD44
GO: Biological Process	GO:0071634	regulation of transforming growth factor beta production			0.001276	1	0.006361	0.05929	5	37	TYROBP,GATA6,PTGS2,THBS1,LUM
GO: Biological Process	GO:0035872	nucleotide-binding domain, leucine rich repeat containing receptor signaling pathway			0.001276	1	0.006361	0.05929	5	37	RIPK2,PTPN22,NOD2,TLR4,TNFAIP3
GO: Biological Process	GO:0002691	regulation of cellular extravasation			0.001276	1	0.006361	0.05929	5	37	CCR2,CCL2,ICAM1,ITGA4,PTAFR
GO: Biological Process	GO:0044319	wound healing, spreading of cells			0.001276	1	0.006361	0.05929	5	37	MMP12,COL5A1,CCN1,LCP1,CD44
GO: Biological Process	GO:0090257	regulation of muscle system process			0.001283	1	0.00639	0.05956	16	303	ADA,ADORA2B,CLIC2,PIK3CG,AIF1,COL14A1,PLN,CNN1,LMCD1,IGF1,PTAFR,PTGS2,CCN4,KCNMA1,RGS2,TNFRSF1B
GO: Biological Process	GO:0051283	negative regulation of sequestering of calcium ion			0.001285	1	0.006391	0.05957	10	142	CLIC2,CXCL9,CCR5,PLN,MYO5A,PTPRC,MCOLN1,EDNRA,CORO1A,LYN
GO: Biological Process	GO:0045471	response to ethanol			0.001285	1	0.006391	0.05957	10	142	ADCY7,S100A8,CCL7,ICAM1,IGF1,CYBB,RGS2,LEP,CD14,TLR4
GO: Biological Process	GO:2000181	negative regulation of blood vessel morphogenesis			0.001304	1	0.006474	0.06034	12	193	SERPINF1,CCR2,CCL2,RGCC,PPARG,DCN,SULF1,EMILIN1,THBS1,THBS2,CD36,SERPINE1
GO: Biological Process	GO:0030832	regulation of actin filament length			0.001304	1	0.006474	0.06034	12	193	CCL11,PLEK,ICAM1,GMFG,PYCARD,CAPG,ARPC1B,CORO1A,TLR2,HCK,HCLS1,NCKAP1L
GO: Biological Process	GO:0048678	response to axon injury			0.001331	1	0.006604	0.06155	8	96	TYROBP,AIF1,MMP2,APOE,DPYSL3,GRN,LGALS1,LYN
GO: Biological Process	GO:0045058	T cell selection			0.001333	1	0.006611	0.06162	6	55	HLA-DMA,FAS,IL6,PTPRC,DOCK2,CD28
GO: Biological Process	GO:2001237	negative regulation of extrinsic apoptotic signaling pathway			0.001352	1	0.006697	0.06242	9	119	HMOX1,ICAM1,FAS,IGF1,SCG2,LGALS3,THBS1,SERPINE1,TNFAIP3
GO: Biological Process	GO:0043280	positive regulation of cysteine-type endopeptidase activity involved in apoptotic process			0.001355	1	0.006707	0.06252	10	143	CLEC7A,S100A8,S100A9,PPARG,FAS,CCN1,PYCARD,CTSD,CASP1,NLRP3
GO: Biological Process	GO:0051402	neuron apoptotic process			0.00142	1	0.006994	0.0652	16	306	CEBPB,HMOX1,TYROBP,CCL2,APOE,FAS,CTSZ,LGMN,NAIP,NCF2,ITGAM,KCNMA1,C5AR1,GRN,NUPR1,CORO1A
GO: Biological Process	GO:0120162	positive regulation of cold-induced thermogenesis			0.001423	1	0.006994	0.0652	8	97	CEBPB,PLAC8,FABP4,FABP5,CCR2,UCP2,LEP,CD36
GO: Biological Process	GO:0051282	regulation of sequestering of calcium ion			0.001428	1	0.006994	0.0652	10	144	CLIC2,CXCL9,CCR5,PLN,MYO5A,PTPRC,MCOLN1,EDNRA,CORO1A,LYN
GO: Biological Process	GO:0090504	epiboly			0.001443	1	0.006994	0.0652	5	38	MMP12,COL5A1,CCN1,LCP1,CD44
GO: Biological Process	GO:1902523	positive regulation of protein K63-linked ubiquitination			0.001452	1	0.006994	0.0652	2	3	PTPN22,NOD2
GO: Biological Process	GO:0001812	positive regulation of type I hypersensitivity			0.001452	1	0.006994	0.0652	2	3	FCER1G,BTK
GO: Biological Process	GO:0001802	type III hypersensitivity			0.001452	1	0.006994	0.0652	2	3	FCER1G,BTK
GO: Biological Process	GO:0001803	regulation of type III hypersensitivity			0.001452	1	0.006994	0.0652	2	3	FCER1G,BTK
GO: Biological Process	GO:0001805	positive regulation of type III hypersensitivity			0.001452	1	0.006994	0.0652	2	3	FCER1G,BTK
GO: Biological Process	GO:1903615	positive regulation of protein tyrosine phosphatase activity			0.001452	1	0.006994	0.0652	2	3	PTPRC,CD33
GO: Biological Process	GO:0043456	regulation of pentose-phosphate shunt			0.001452	1	0.006994	0.0652	2	3	HSD11B1,TIGAR
GO: Biological Process	GO:0071226	cellular response to molecule of fungal origin			0.001452	1	0.006994	0.0652	2	3	CLEC7A,BTK
GO: Biological Process	GO:0046061	dATP catabolic process			0.001452	1	0.006994	0.0652	2	3	ADA,SAMHD1
GO: Biological Process	GO:0034157	positive regulation of toll-like receptor 7 signaling pathway			0.001452	1	0.006994	0.0652	2	3	RSAD2,PTPN22
GO: Biological Process	GO:1903971	positive regulation of response to macrophage colony-stimulating factor			0.001452	1	0.006994	0.0652	2	3	TLR2,TLR4
GO: Biological Process	GO:1903974	positive regulation of cellular response to macrophage colony-stimulating factor stimulus			0.001452	1	0.006994	0.0652	2	3	TLR2,TLR4
GO: Biological Process	GO:1901329	regulation of odontoblast differentiation			0.001452	1	0.006994	0.0652	2	3	CEBPB,SERPINE1
GO: Biological Process	GO:2001189	negative regulation of T cell activation via T cell receptor contact with antigen bound to MHC molecule on antigen presenting cell			0.001452	1	0.006994	0.0652	2	3	LILRB1,LGALS3
GO: Biological Process	GO:0002277	myeloid dendritic cell activation involved in immune response			0.001452	1	0.006994	0.0652	2	3	PYCARD,DOCK2
GO: Biological Process	GO:0070340	detection of bacterial lipopeptide			0.001452	1	0.006994	0.0652	2	3	TLR1,TLR2
GO: Biological Process	GO:0002399	MHC class II protein complex assembly			0.001452	1	0.006994	0.0652	2	3	HLA-DMA,HLA-DRA
GO: Biological Process	GO:1904149	regulation of microglial cell mediated cytotoxicity			0.001452	1	0.006994	0.0652	2	3	TYROBP,ITGAM
GO: Biological Process	GO:1904151	positive regulation of microglial cell mediated cytotoxicity			0.001452	1	0.006994	0.0652	2	3	TYROBP,ITGAM
GO: Biological Process	GO:0070433	negative regulation of nucleotide-binding oligomerization domain containing 2 signaling pathway			0.001452	1	0.006994	0.0652	2	3	PTPN22,TNFAIP3
GO: Biological Process	GO:0070428	regulation of nucleotide-binding oligomerization domain containing 1 signaling pathway			0.001452	1	0.006994	0.0652	2	3	TLR4,TNFAIP3
GO: Biological Process	GO:0070425	negative regulation of nucleotide-binding oligomerization domain containing signaling pathway			0.001452	1	0.006994	0.0652	2	3	PTPN22,TNFAIP3
GO: Biological Process	GO:0035702	monocyte homeostasis			0.001452	1	0.006994	0.0652	2	3	CCL2,SH2B3
GO: Biological Process	GO:0071403	cellular response to high density lipoprotein particle stimulus			0.001452	1	0.006994	0.0652	2	3	ABCA1,ABCG1
GO: Biological Process	GO:0090634	microglial cell mediated cytotoxicity			0.001452	1	0.006994	0.0652	2	3	TYROBP,ITGAM
GO: Biological Process	GO:0006154	adenosine catabolic process			0.001452	1	0.006994	0.0652	2	3	ADA,ADA2
GO: Biological Process	GO:0045957	negative regulation of complement activation, alternative pathway			0.001452	1	0.006994	0.0652	2	3	VSIG4,CR1
GO: Biological Process	GO:0002752	cell surface pattern recognition receptor signaling pathway			0.001452	1	0.006994	0.0652	2	3	FCN1,TLR2
GO: Biological Process	GO:0002432	granuloma formation			0.001452	1	0.006994	0.0652	2	3	CEBPB,TNFAIP3
GO: Biological Process	GO:0002585	positive regulation of antigen processing and presentation of peptide antigen			0.001452	1	0.006994	0.0652	2	3	PYCARD,TREM2
GO: Biological Process	GO:0002503	peptide antigen assembly with MHC class II protein complex			0.001452	1	0.006994	0.0652	2	3	HLA-DMA,HLA-DRA
GO: Biological Process	GO:0019933	cAMP-mediated signaling			0.001455	1	0.007006	0.0653	15	278	ABCA1,ADGRE2,ADCY7,ADORA2B,CXCL9,AHR,PLN,GPR65,FPR1,MARCO,PTGDR,GNA15,RGS1,RGS2,EDNRA
GO: Biological Process	GO:0002762	negative regulation of myeloid leukocyte differentiation			0.001466	1	0.00705	0.06572	6	56	FBN1,INHBA,LILRB1,LILRB4,TLR4,LYN
GO: Biological Process	GO:0015909	long-chain fatty acid transport			0.001478	1	0.007102	0.0662	7	76	FABP4,PLIN2,ANXA1,APOE,PPARG,THBS1,CD36
GO: Biological Process	GO:0038061	NIK/NF-kappaB signaling			0.001487	1	0.007134	0.0665	12	196	TLR7,CHI3L1,RASSF2,PTPN22,NOD2,NLRP3,CD14,TLR1,TLR2,TLR4,TREM2,GREM1
GO: Biological Process	GO:0048015	phosphatidylinositol-mediated signaling			0.001487	1	0.007134	0.0665	12	196	PDGFRA,TWIST1,PIK3CG,CCL5,FGR,IGF1,PTAFR,DCN,LEP,CD28,LYN,HCLS1
GO: Biological Process	GO:0042476	odontogenesis			0.001504	1	0.007212	0.06723	10	145	PDGFRA,TCIRG1,TWIST1,COL1A1,COL1A2,MYO5A,INHBA,ASPN,EDNRA,SERPINE1
GO: Biological Process	GO:0001911	negative regulation of leukocyte mediated cytotoxicity			0.001515	1	0.007235	0.06743	4	23	FCGR2B,IL7R,LILRB1,PTPRC
GO: Biological Process	GO:0032717	negative regulation of interleukin-8 production			0.001515	1	0.007235	0.06743	4	23	ANXA1,IL10,PTPN22,CD33
GO: Biological Process	GO:0006837	serotonin transport			0.001515	1	0.007235	0.06743	4	23	CD300A,FCER1G,LILRB1,LGALS3
GO: Biological Process	GO:1903975	regulation of glial cell migration			0.001515	1	0.007235	0.06743	4	23	CCR2,FAS,GPR183,TREM2
GO: Biological Process	GO:0071800	podosome assembly			0.001515	1	0.007235	0.06743	4	23	BIN2,CAPG,LCP1,HCK
GO: Biological Process	GO:0034766	negative regulation of ion transmembrane transport			0.001519	1	0.00725	0.06758	9	121	TWIST1,KCNE4,CLIC2,AHR,MMP9,PLN,GEM,RGS2,THBS1
GO: Biological Process	GO:0045444	fat cell differentiation			0.00152	1	0.00725	0.06758	14	251	CEBPB,PLAC8,FABP4,PPARG,IGF1,IL6,PTGS2,STK4,CCN4,RGS2,LEP,ZFPM2,EGR2,DUSP10
GO: Biological Process	GO:0048589	developmental growth			0.00153	1	0.007291	0.06796	32	821	EREG,PDGFRA,PLAC8,BASP1,AHR,FGF7,COL14A1,CCL11,COL6A3,COMP,FN1,ANXA1,APOE,AREG,POSTN,IGF1,LGMN,GATA6,ITGA4,ZEB2,NRP2,STK4,CCN4,C3,NINJ2,RGS2,LEP,ZFPM2,THBS1,SERPINE1,DUSP10,DCLK1
GO: Biological Process	GO:2000109	regulation of macrophage apoptotic process			0.001567	1	0.007425	0.06921	3	11	CCL5,CCR5,NOD2
GO: Biological Process	GO:0046085	adenosine metabolic process			0.001567	1	0.007425	0.06921	3	11	ADA,PTGDR,ADA2
GO: Biological Process	GO:0060346	bone trabecula formation			0.001567	1	0.007425	0.06921	3	11	MMP2,COL1A1,GREM1
GO: Biological Process	GO:0014062	regulation of serotonin secretion			0.001567	1	0.007425	0.06921	3	11	CD300A,LILRB1,LGALS3
GO: Biological Process	GO:0002604	regulation of dendritic cell antigen processing and presentation			0.001567	1	0.007425	0.06921	3	11	FCGR2B,NOD2,THBS1
GO: Biological Process	GO:0002634	regulation of germinal center formation			0.001567	1	0.007425	0.06921	3	11	HLA-DMA,ADA,TNFAIP3
GO: Biological Process	GO:0051764	actin crosslink formation			0.001567	1	0.007425	0.06921	3	11	ACTN1,AIF1,DPYSL3
GO: Biological Process	GO:2000551	regulation of T-helper 2 cell cytokine production			0.001567	1	0.007425	0.06921	3	11	RSAD2,IL6,NLRP3
GO: Biological Process	GO:0006940	regulation of smooth muscle contraction			0.001595	1	0.00755	0.07038	7	77	ADA,ADORA2B,CNN1,PTAFR,PTGS2,KCNMA1,RGS2
GO: Biological Process	GO:0060760	positive regulation of response to cytokine stimulus			0.001608	1	0.007602	0.07086	6	57	MMP12,RIPK2,CASP1,TLR2,TLR4,TREM2
GO: Biological Process	GO:0006690	icosanoid metabolic process			0.001608	1	0.007602	0.07086	9	122	FABP5,ALOX5,ALOX5AP,ANXA1,PTGIS,PTGS2,TBXAS1,TLR2,TLR4
GO: Biological Process	GO:0050829	defense response to Gram-negative bacterium			0.001622	1	0.007647	0.07128	8	99	PYCARD,IL6,RNASE2,RNASE6,TLR4,SERPINE1,TREM1,LYZ
GO: Biological Process	GO:0097306	cellular response to alcohol			0.001622	1	0.007647	0.07128	8	99	ABCA1,ADCY7,AHR,CCL7,PPARG,CYBB,INHBA,PTGDR
GO: Biological Process	GO:0034340	response to type I interferon			0.001622	1	0.007647	0.07128	8	99	MMP12,IRF8,SAMHD1,RSAD2,XAF1,MX2,GBP2,OAS2
GO: Biological Process	GO:1903792	negative regulation of anion transport			0.001625	1	0.007647	0.07128	5	39	SFRP4,IL1RN,RGS2,LEP,THBS1
GO: Biological Process	GO:0032660	regulation of interleukin-17 production			0.001625	1	0.007647	0.07128	5	39	IL6,NOD2,TLR2,TLR4,NCKAP1L
GO: Biological Process	GO:0071604	transforming growth factor beta production			0.001625	1	0.007647	0.07128	5	39	TYROBP,GATA6,PTGS2,THBS1,LUM
GO: Biological Process	GO:0036293	response to decreased oxygen levels			0.001634	1	0.007684	0.07162	19	400	HMOX1,ADA,TWIST1,UCP2,MMP2,ICAM1,RGCC,POSTN,CYBB,GATA6,PTGIS,PTGS2,KCNMA1,TIGAR,LEP,EDNRA,THBS1,CD38,TLR2
GO: Biological Process	GO:0030833	regulation of actin filament polymerization			0.001637	1	0.007689	0.07167	11	172	CCL11,ICAM1,GMFG,PYCARD,CAPG,ARPC1B,CORO1A,TLR2,HCK,HCLS1,NCKAP1L
GO: Biological Process	GO:0043087	regulation of GTPase activity			0.001655	1	0.007772	0.07244	22	494	CORO1C,CCL2,CCL4,CCL5,CCL7,CCL8,CCL11,CCL18,CCL20,VAV1,GPR65,ICAM1,DOCK10,ARHGDIB,PYCARD,ADAP2,ARHGAP25,DOCK2,RGS1,RGS2,PLXNC1,NCKAP1L
GO: Biological Process	GO:0051208	sequestering of calcium ion			0.001666	1	0.007817	0.07286	10	147	CLIC2,CXCL9,CCR5,PLN,MYO5A,PTPRC,MCOLN1,EDNRA,CORO1A,LYN
GO: Biological Process	GO:0048662	negative regulation of smooth muscle cell proliferation			0.00172	1	0.008055	0.07508	7	78	HMOX1,AIF1,CNN1,PPARG,IL10,OGN,TNFAIP3
GO: Biological Process	GO:0045453	bone resorption			0.00172	1	0.008055	0.07508	7	78	ACP5,TCIRG1,CTSS,IL6,RAC2,CD38,TNFAIP3
GO: Biological Process	GO:0007492	endoderm development			0.001752	1	0.008197	0.07641	13	227	MMP2,MMP9,COL5A1,COL5A2,COL8A1,FN1,IL1RN,IL10,INHBA,GATA6,ITGA4,ITGB2,TNFAIP3
GO: Biological Process	GO:0045598	regulation of fat cell differentiation			0.001753	1	0.008197	0.07641	10	148	CEBPB,PPARG,IGF1,IL6,PTGS2,STK4,CCN4,LEP,ZFPM2,DUSP10
GO: Biological Process	GO:0040007	growth			0.001773	1	0.008285	0.07722	42	1181	EREG,PDGFRA,PLAC8,S100A8,S100A9,BASP1,AHR,FGF7,COL14A1,CCL11,COL6A3,COMP,FN1,ANXA1,APOE,PPARG,AREG,POSTN,IGF1,CSF2RB,LGMN,INHBA,GATA6,ITGA4,ZEB2,NRP2,STK4,CCN4,C3,NINJ2,RGS2,LEP,ZFPM2,THBS1,CD38,SERPINE1,CD44,DUSP10,GREM1,EMP1,EMP3,DCLK1
GO: Biological Process	GO:0034138	toll-like receptor 3 signaling pathway			0.001786	1	0.008316	0.07751	4	24	COLEC12,PTPN22,CD86,TNFAIP3
GO: Biological Process	GO:0034123	positive regulation of toll-like receptor signaling pathway			0.001786	1	0.008316	0.07751	4	24	RSAD2,PTPN22,TLR1,TLR2
GO: Biological Process	GO:0071605	monocyte chemotactic protein-1 production			0.001786	1	0.008316	0.07751	4	24	CLEC7A,TWIST1,NOD2,CD84
GO: Biological Process	GO:0071637	regulation of monocyte chemotactic protein-1 production			0.001786	1	0.008316	0.07751	4	24	CLEC7A,TWIST1,NOD2,CD84
GO: Biological Process	GO:0010447	response to acidic pH			0.001786	1	0.008316	0.07751	4	24	SERPINF1,GPR65,CTSS,LGMN
GO: Biological Process	GO:0006739	NADP metabolic process			0.001824	1	0.00848	0.07905	5	40	ME1,HSD11B1,NCF2,TIGAR,CYB5R4
GO: Biological Process	GO:2000249	regulation of actin cytoskeleton reorganization			0.001824	1	0.00848	0.07905	5	40	PDGFRA,GMFG,ARHGDIB,HCK,HCLS1
GO: Biological Process	GO:0044087	regulation of cellular component biogenesis			0.001829	1	0.008495	0.07919	38	1040	ABCA1,CORO1C,CLEC7A,AHR,CCL11,MMP1,PLEK,AIM2,COL16A1,GPR65,ICAM1,RGCC,GMFG,APOE,FAS,CCN1,PYCARD,JCHAIN,XAF1,SRPX2,NAV3,RAC2,DPYSL3,CAPG,LCP1,NUPR1,EMILIN1,ARPC1B,CORO1A,THBS1,THBS2,CD36,TLR2,TLR4,GREM1,HCK,HCLS1,NCKAP1L
GO: Biological Process	GO:0044283	small molecule biosynthetic process			0.001867	1	0.008661	0.08073	30	763	CES1,ADA,FABP5,HRH1,UPP1,ALDH1A3,PLEK,ALOX5,PLTP,ALOX5AP,ANXA1,SAMHD1,APOC1,APOE,SLC1A3,ABCG1,VCAN,IL6,MYO5A,NCF2,PTAFR,DCN,ADA2,PTGIS,PTGS2,SMPDL3A,SDS,TBXAS1,LEP,DHRS9
GO: Biological Process	GO:1903522	regulation of blood circulation			0.001867	1	0.008661	0.08073	17	344	ADA,ADORA3,KCNE4,CLIC2,PIK3CG,AHR,HRH1,MMP2,PLN,ALOX5,ICAM1,PTAFR,PTGS2,TBXAS1,RGS2,LEP,CD38
GO: Biological Process	GO:2001238	positive regulation of extrinsic apoptotic signaling pathway			0.001924	1	0.008919	0.08314	6	59	SRPX,PYCARD,INHBA,STK4,PTPRC,THBS1
GO: Biological Process	GO:0051098	regulation of binding			0.001932	1	0.00895	0.08342	20	437	HMOX1,TWIST1,CLIC2,SPON1,PLAUR,MMP9,PLN,BAG2,APOE,PPARG,IGF1,CTSZ,IL10,RIPK2,ITGA4,STK4,LGALS3,LOX,CD36,TLR4
GO: Biological Process	GO:0030838	positive regulation of actin filament polymerization			0.001962	1	0.009076	0.0846	8	102	CCL11,ICAM1,GMFG,PYCARD,ARPC1B,CORO1A,HCK,NCKAP1L
GO: Biological Process	GO:0060420	regulation of heart growth			0.001962	1	0.009076	0.0846	8	102	BASP1,AHR,COL14A1,IGF1,GATA6,CCN4,RGS2,ZFPM2
GO: Biological Process	GO:0016042	lipid catabolic process			0.001984	1	0.00917	0.08548	17	346	PLBD1,CES1,PLD3,FABP4,FABP5,TWIST1,PIK3CG,HSD11B1,AOAH,APOC1,APOE,FUCA1,SMPDL3A,GM2A,PLA2G7,LEP,LIPA
GO: Biological Process	GO:0042590	antigen processing and presentation of exogenous peptide antigen via MHC class I			0.001991	1	0.009189	0.08565	7	80	FCER1G,FCGR1B,CYBB,NCF2,NCF4,CLEC4A,CD36
GO: Biological Process	GO:0031100	animal organ regeneration			0.001991	1	0.009189	0.08565	7	80	CEBPB,HMOX1,PPARG,IL10,C5AR1,NNMT,LCP1
GO: Biological Process	GO:0044344	cellular response to fibroblast growth factor stimulus			0.002033	1	0.009377	0.08741	10	151	CCL2,FGF7,CCL5,COL1A1,POSTN,CXCL8,SULF1,THBS1,EGR3,CD44
GO: Biological Process	GO:0098751	bone cell development			0.00204	1	0.009394	0.08757	5	41	TYROBP,FBN1,FLI1,LILRB1,SH2B3
GO: Biological Process	GO:0045940	positive regulation of steroid metabolic process			0.00204	1	0.009394	0.08757	5	41	ADORA2B,APOC1,APOE,ABCG1,IGF1
GO: Biological Process	GO:0098792	xenophagy			0.002056	1	0.009404	0.08765	3	12	RIPK2,NOD2,TLR2
GO: Biological Process	GO:0001660	fever generation			0.002056	1	0.009404	0.08765	3	12	CCL5,IL1RN,PTGS2
GO: Biological Process	GO:0046348	amino sugar catabolic process			0.002056	1	0.009404	0.08765	3	12	NPL,CHIT1,NAGK
GO: Biological Process	GO:0072641	type I interferon secretion			0.002056	1	0.009404	0.08765	3	12	MMP12,PTPN22,LILRB1
GO: Biological Process	GO:0042492	gamma-delta T cell differentiation			0.002056	1	0.009404	0.08765	3	12	PTPRC,EGR3,NCKAP1L
GO: Biological Process	GO:0034115	negative regulation of heterotypic cell-cell adhesion			0.002056	1	0.009404	0.08765	3	12	IL1RN,IL10,TNFAIP3
GO: Biological Process	GO:0002003	angiotensin maturation			0.002056	1	0.009404	0.08765	3	12	CES1,CPA3,CTSZ
GO: Biological Process	GO:0070587	regulation of cell-cell adhesion involved in gastrulation			0.002056	1	0.009404	0.08765	3	12	IL1RN,IL10,TNFAIP3
GO: Biological Process	GO:0019371	cyclooxygenase pathway			0.002056	1	0.009404	0.08765	3	12	PTGIS,PTGS2,TBXAS1
GO: Biological Process	GO:1901570	fatty acid derivative biosynthetic process			0.002087	1	0.009537	0.08889	8	103	FABP5,ALOX5,ALOX5AP,ANXA1,FAR2,PTGIS,PTGS2,TBXAS1
GO: Biological Process	GO:0032373	positive regulation of sterol transport			0.002089	1	0.009537	0.08889	4	25	ABCA1,PLTP,APOE,ABCG1
GO: Biological Process	GO:0032376	positive regulation of cholesterol transport			0.002089	1	0.009537	0.08889	4	25	ABCA1,PLTP,APOE,ABCG1
GO: Biological Process	GO:0060324	face development			0.002099	1	0.009565	0.08916	6	60	PDGFRA,MMP2,ALDH1A3,COL1A1,ITGA4,CRISPLD2
GO: Biological Process	GO:0031295	T cell costimulation			0.002099	1	0.009565	0.08916	6	60	VAV1,MAP3K8,LGALS1,CD28,CD86,LYN
GO: Biological Process	GO:0032481	positive regulation of type I interferon production			0.002139	1	0.009741	0.0908	7	81	TLR7,MMP12,RIPK2,PTPN22,CD14,TLR2,TLR4
GO: Biological Process	GO:0051259	protein complex oligomerization			0.002164	1	0.009848	0.0918	27	669	HMOX1,ME1,COLEC12,FCER1G,CCL5,MMP1,ALDH1A3,MMP9,PLN,AIM2,ALOX5AP,COL1A1,COL1A2,VWF,SAMHD1,APOE,FAS,PYCARD,JCHAIN,NOD2,KCNMA1,DPYSL3,TDO2,MCOLN1,EMILIN1,NLRP3,TNFAIP3
GO: Biological Process	GO:1903169	regulation of calcium ion transmembrane transport			0.002242	1	0.0102	0.09504	11	179	CLIC2,PIK3CG,CXCL9,AHR,PLN,MYO5A,PTPN22,GEM,EDNRA,CORO1A,LYN
GO: Biological Process	GO:0043949	regulation of cAMP-mediated signaling			0.002262	1	0.01028	0.09584	14	262	ABCA1,ADGRE2,ADCY7,ADORA2B,CXCL9,PLN,GPR65,FPR1,MARCO,PTGDR,GNA15,RGS1,RGS2,EDNRA
GO: Biological Process	GO:1902042	negative regulation of extrinsic apoptotic signaling pathway via death domain receptors			0.002274	1	0.01033	0.09627	5	42	HMOX1,ICAM1,FAS,SERPINE1,TNFAIP3
GO: Biological Process	GO:0070231	T cell apoptotic process			0.002285	1	0.01036	0.09658	6	61	ADA,CLC,CCL5,FAS,IL7R,LGALS3
GO: Biological Process	GO:0018149	peptide cross-linking			0.002285	1	0.01036	0.09658	6	61	COL3A1,FN1,ANXA1,CSTA,DCN,THBS1
GO: Biological Process	GO:0008406	gonad development			0.002342	1	0.01062	0.09895	14	263	EREG,CEBPB,PDGFRA,BASP1,AHR,FGF7,MMP2,ICAM1,INHBA,GATA6,NUPR1,LEP,ZFPM2,SERPINE1
GO: Biological Process	GO:1901343	negative regulation of vasculature development			0.002348	1	0.01063	0.09909	12	207	SERPINF1,CCR2,CCL2,RGCC,PPARG,DCN,SULF1,EMILIN1,THBS1,THBS2,CD36,SERPINE1
GO: Biological Process	GO:0071901	negative regulation of protein serine/threonine kinase activity			0.002349	1	0.01063	0.09909	10	154	CD300A,APOE,PYCARD,PTPN22,SH2B3,RGS2,IRAK3,DUSP10,TNFAIP3,LYN
GO: Biological Process	GO:0007548	sex differentiation			0.002377	1	0.01074	0.1001	16	322	EREG,CEBPB,PDGFRA,BASP1,AHR,FGF7,MMP2,MERTK,ICAM1,INHBA,GATA6,NUPR1,LEP,ZFPM2,SERPINE1,LHFPL2
GO: Biological Process	GO:0051403	stress-activated MAPK cascade			0.002377	1	0.01074	0.1001	16	322	ADORA2B,FCGR2B,SFRP4,MAP3K8,FAS,PYCARD,IL1RN,RASSF2,RIPK2,PTPN22,ZEB2,NOD2,LEP,TLR4,DUSP10,GREM1
GO: Biological Process	GO:0002009	morphogenesis of an epithelium			0.002426	1	0.01093	0.1019	26	641	PDGFRA,TWIST1,MGP,AHR,FGF7,CCL11,MMP2,ALDH1A3,MMP12,COL5A1,AREG,IGF1,CCN1,CTSD,IL6,CTSZ,CXCR2,IL10,ITGAX,ZEB2,STK4,SULF1,LCP1,EDNRA,CD44,GREM1
GO: Biological Process	GO:0034104	negative regulation of tissue remodeling			0.002426	1	0.01093	0.1019	4	26	IL6,CD38,TNFAIP3,GREM1
GO: Biological Process	GO:0032366	intracellular sterol transport			0.002426	1	0.01093	0.1019	4	26	ABCA1,CES1,ABCG1,NPC1
GO: Biological Process	GO:0032367	intracellular cholesterol transport			0.002426	1	0.01093	0.1019	4	26	ABCA1,CES1,ABCG1,NPC1
GO: Biological Process	GO:0010638	positive regulation of organelle organization			0.002449	1	0.01103	0.1028	27	675	EREG,PLAUR,CCL11,PLEK,MMP9,GPR65,ANXA1,ICAM1,RGCC,GMFG,FAS,IGF1,PYCARD,DCN,NAV3,RAC2,CAPG,GRN,LCP1,ARPC1B,CORO1A,CD28,GZMB,TREM2,HCK,HCLS1,NCKAP1L
GO: Biological Process	GO:0001937	negative regulation of endothelial cell proliferation			0.002459	1	0.01106	0.1031	7	83	CCL2,RGCC,APOE,PPARG,SULF1,SCG2,THBS1
GO: Biological Process	GO:0070373	negative regulation of ERK1 and ERK2 cascade			0.002459	1	0.01106	0.1031	7	83	FBLN1,IGF1,PTPRC,EMILIN1,TLR4,DUSP10,LYN
GO: Biological Process	GO:0022612	gland morphogenesis			0.002463	1	0.01106	0.1031	10	155	CEBPB,FGF7,CCL11,MMP2,AREG,IGF1,IL6,SULF1,CD44,TNFAIP3
GO: Biological Process	GO:0008037	cell recognition			0.002464	1	0.01106	0.1031	13	236	CLEC7A,COLEC12,FCN1,FOLR2,VCAN,IGKC,IGLC1,DOCK2,LGALS3,CORO1A,CD36,CRTAM,TRBC1
GO: Biological Process	GO:0031294	lymphocyte costimulation			0.002483	1	0.01114	0.1038	6	62	VAV1,MAP3K8,LGALS1,CD28,CD86,LYN
GO: Biological Process	GO:1904063	negative regulation of cation transmembrane transport			0.0025	1	0.01121	0.1045	8	106	TWIST1,KCNE4,CLIC2,AHR,MMP9,PLN,GEM,RGS2
GO: Biological Process	GO:0019835	cytolysis			0.002527	1	0.01132	0.1055	5	43	CFH,MICB,LILRB1,GZMB,LYZ
GO: Biological Process	GO:0016045	detection of bacterium			0.002628	1	0.01163	0.1084	3	13	NOD2,TLR1,TLR2
GO: Biological Process	GO:1901163	regulation of trophoblast cell migration			0.002628	1	0.01163	0.1084	3	13	MMP12,ARHGDIB,TIMP1
GO: Biological Process	GO:0097278	complement-dependent cytotoxicity			0.002628	1	0.01163	0.1084	3	13	CFH,IL10,C3
GO: Biological Process	GO:0035589	G protein-coupled purinergic nucleotide receptor signaling pathway			0.002628	1	0.01163	0.1084	3	13	GPR171,PTAFR,P2RY14
GO: Biological Process	GO:0034374	low-density lipoprotein particle remodeling			0.002628	1	0.01163	0.1084	3	13	APOE,ABCG1,PLA2G7
GO: Biological Process	GO:2001204	regulation of osteoclast development			0.002628	1	0.01163	0.1084	3	13	TYROBP,FBN1,LILRB1
GO: Biological Process	GO:1903011	negative regulation of bone development			0.002628	1	0.01163	0.1084	3	13	FBN1,LILRB1,GREM1
GO: Biological Process	GO:0002002	regulation of angiotensin levels in blood			0.002628	1	0.01163	0.1084	3	13	CES1,CPA3,CTSZ
GO: Biological Process	GO:0002664	regulation of T cell tolerance induction			0.002628	1	0.01163	0.1084	3	13	LILRB2,CLC,CD86
GO: Biological Process	GO:0045906	negative regulation of vasoconstriction			0.002628	1	0.01163	0.1084	3	13	AHR,MMP2,LEP
GO: Biological Process	GO:0044557	relaxation of smooth muscle			0.002628	1	0.01163	0.1084	3	13	ADORA2B,KCNMA1,RGS2
GO: Biological Process	GO:0002730	regulation of dendritic cell cytokine production			0.002628	1	0.01163	0.1084	3	13	NOD2,TLR2,TLR4
GO: Biological Process	GO:0010872	regulation of cholesterol esterification			0.002628	1	0.01163	0.1084	3	13	APOC1,APOE,ABCG1
GO: Biological Process	GO:0070586	cell-cell adhesion involved in gastrulation			0.002628	1	0.01163	0.1084	3	13	IL1RN,IL10,TNFAIP3
GO: Biological Process	GO:0051549	positive regulation of keratinocyte migration			0.002628	1	0.01163	0.1084	3	13	FGF7,MMP9,SERPINE1
GO: Biological Process	GO:0045625	regulation of T-helper 1 cell differentiation			0.002628	1	0.01163	0.1084	3	13	CCR2,ANXA1,RIPK2
GO: Biological Process	GO:0002551	mast cell chemotaxis			0.002628	1	0.01163	0.1084	3	13	CCL5,CCL11,RAC2
GO: Biological Process	GO:0032872	regulation of stress-activated MAPK cascade			0.002687	1	0.01189	0.1108	14	267	FCGR2B,SFRP4,FAS,PYCARD,IL1RN,RASSF2,RIPK2,PTPN22,ZEB2,NOD2,LEP,TLR4,DUSP10,GREM1
GO: Biological Process	GO:0002381	immunoglobulin production involved in immunoglobulin mediated immune response			0.002694	1	0.01191	0.111	6	63	HLA-DQB1,IL10,NOD2,PTPRC,BTK,CD28
GO: Biological Process	GO:0031342	negative regulation of cell killing			0.002799	1	0.01232	0.1149	4	27	FCGR2B,IL7R,LILRB1,PTPRC
GO: Biological Process	GO:0036037	CD8-positive, alpha-beta T cell activation			0.002799	1	0.01232	0.1149	4	27	PTPN22,LILRB1,CLEC4A,NCKAP1L
GO: Biological Process	GO:0032461	positive regulation of protein oligomerization			0.002799	1	0.01232	0.1149	4	27	MMP1,AIM2,FAS,JCHAIN
GO: Biological Process	GO:0002719	negative regulation of cytokine production involved in immune response			0.002799	1	0.01232	0.1149	4	27	HMOX1,IL10,LILRB1,IRAK3
GO: Biological Process	GO:0090382	phagosome maturation			0.0028	1	0.01232	0.1149	5	44	TCIRG1,SRPX,SLAMF8,RAB31,CORO1A
GO: Biological Process	GO:0032620	interleukin-17 production			0.0028	1	0.01232	0.1149	5	44	IL6,NOD2,TLR2,TLR4,NCKAP1L
GO: Biological Process	GO:1990845	adaptive thermogenesis			0.002831	1	0.01242	0.1157	10	158	CEBPB,PLAC8,FABP4,FABP5,CCR2,UCP2,PPARG,LEP,CD36,TLR4
GO: Biological Process	GO:0071774	response to fibroblast growth factor			0.002831	1	0.01242	0.1157	10	158	CCL2,FGF7,CCL5,COL1A1,POSTN,CXCL8,SULF1,THBS1,EGR3,CD44
GO: Biological Process	GO:1902566	regulation of eosinophil activation			0.002861	1	0.01242	0.1157	2	4	CD300A,CCR2
GO: Biological Process	GO:0001798	positive regulation of type IIa hypersensitivity			0.002861	1	0.01242	0.1157	2	4	FCER1G,C3
GO: Biological Process	GO:0060244	negative regulation of cell proliferation involved in contact inhibition			0.002861	1	0.01242	0.1157	2	4	FAP,SRPX
GO: Biological Process	GO:0002894	positive regulation of type II hypersensitivity			0.002861	1	0.01242	0.1157	2	4	FCER1G,C3
GO: Biological Process	GO:0071279	cellular response to cobalt ion			0.002861	1	0.01242	0.1157	2	4	SERPINF1,TIGAR
GO: Biological Process	GO:0035684	helper T cell extravasation			0.002861	1	0.01242	0.1157	2	4	CCL2,CCL5
GO: Biological Process	GO:0035697	CD8-positive, alpha-beta T cell extravasation			0.002861	1	0.01242	0.1157	2	4	CCR2,CCL5
GO: Biological Process	GO:0042494	detection of bacterial lipoprotein			0.002861	1	0.01242	0.1157	2	4	TLR1,TLR2
GO: Biological Process	GO:0046103	inosine biosynthetic process			0.002861	1	0.01242	0.1157	2	4	ADA,ADA2
GO: Biological Process	GO:0034155	regulation of toll-like receptor 7 signaling pathway			0.002861	1	0.01242	0.1157	2	4	RSAD2,PTPN22
GO: Biological Process	GO:0002351	serotonin production involved in inflammatory response			0.002861	1	0.01242	0.1157	2	4	CD300A,FCER1G
GO: Biological Process	GO:0110088	hippocampal neuron apoptotic process			0.002861	1	0.01242	0.1157	2	4	TYROBP,ITGAM
GO: Biological Process	GO:0110089	regulation of hippocampal neuron apoptotic process			0.002861	1	0.01242	0.1157	2	4	TYROBP,ITGAM
GO: Biological Process	GO:0034465	response to carbon monoxide			0.002861	1	0.01242	0.1157	2	4	IL10,KCNMA1
GO: Biological Process	GO:0002605	negative regulation of dendritic cell antigen processing and presentation			0.002861	1	0.01242	0.1157	2	4	FCGR2B,THBS1
GO: Biological Process	GO:1903225	negative regulation of endodermal cell differentiation			0.002861	1	0.01242	0.1157	2	4	COL5A1,COL5A2
GO: Biological Process	GO:0002442	serotonin secretion involved in inflammatory response			0.002861	1	0.01242	0.1157	2	4	CD300A,FCER1G
GO: Biological Process	GO:0002586	regulation of antigen processing and presentation of peptide antigen via MHC class II			0.002861	1	0.01242	0.1157	2	4	PYCARD,TREM2
GO: Biological Process	GO:0048732	gland development			0.00289	1	0.01254	0.1168	22	517	CEBPB,PDGFRA,SERPINF1,HMOX1,ADA,AHR,FGF7,PLAUR,CCL11,MMP2,ALDH1A3,VWF,ANXA1,AREG,IGF1,IL6,IL10,GATA6,SULF1,OAS2,CD44,TNFAIP3
GO: Biological Process	GO:0042982	amyloid precursor protein metabolic process			0.002918	1	0.01265	0.1179	6	64	SPON1,APOE,ABCG1,IGF1,SOAT1,LYN
GO: Biological Process	GO:0009895	negative regulation of catabolic process			0.00294	1	0.01274	0.1187	16	329	HMOX1,PIK3CG,APOC1,LAMP3,IL10,IL10RA,PTPN22,NPC1,TIGAR,NUPR1,LEP,TIMP1,TIMP2,TREM2,IRAK3,TNFAIP3
GO: Biological Process	GO:0051495	positive regulation of cytoskeleton organization			0.002952	1	0.01278	0.1191	13	241	CCL11,PLEK,GPR65,ICAM1,RGCC,GMFG,PYCARD,NAV3,ARPC1B,CORO1A,HCK,HCLS1,NCKAP1L
GO: Biological Process	GO:0048705	skeletal system morphogenesis			0.002972	1	0.01286	0.1198	14	270	PDGFRA,ACP5,TWIST1,MGP,COL14A1,MMP2,FGR,COL1A1,COL6A3,PRRX1,SFRP4,COMP,THBS1,GREM1
GO: Biological Process	GO:0015908	fatty acid transport			0.002974	1	0.01286	0.1198	8	109	FABP4,PLIN2,ANXA1,APOE,PPARG,LEP,THBS1,CD36
GO: Biological Process	GO:0006910	phagocytosis, recognition			0.003008	1	0.01299	0.1211	7	86	CLEC7A,COLEC12,FCN1,IGKC,IGLC1,CD36,TRBC1
GO: Biological Process	GO:0051099	positive regulation of binding			0.003083	1	0.01331	0.124	12	214	TWIST1,CLIC2,SPON1,PLAUR,MMP9,APOE,PPARG,IGF1,RIPK2,STK4,LGALS3,TLR4
GO: Biological Process	GO:0001953	negative regulation of cell-matrix adhesion			0.003094	1	0.01334	0.1243	5	45	CORO1C,MMP12,POSTN,THBS1,SERPINE1
GO: Biological Process	GO:0042987	amyloid precursor protein catabolic process			0.003094	1	0.01334	0.1243	5	45	SPON1,APOE,ABCG1,IGF1,LYN
GO: Biological Process	GO:0097553	calcium ion transmembrane import into cytosol			0.003099	1	0.01334	0.1244	10	160	CLIC2,CXCL9,CCR5,PLN,MYO5A,PTPRC,MCOLN1,EDNRA,CORO1A,LYN
GO: Biological Process	GO:0007190	activation of adenylate cyclase activity			0.003099	1	0.01334	0.1244	10	160	ABCA1,ADGRE2,ADCY7,ADORA2B,ADORA3,CXCL9,PLN,GPR65,PTGDR,EDNRA
GO: Biological Process	GO:0050680	negative regulation of epithelial cell proliferation			0.003144	1	0.01351	0.126	11	187	EREG,SERPINF1,CCL2,RGCC,APOE,PPARG,SULF1,SCG2,NUPR1,THBS1,DUSP10
GO: Biological Process	GO:0043534	blood vessel endothelial cell migration			0.003144	1	0.01351	0.126	11	187	HMOX1,ANXA1,RGCC,APOE,PPARG,IGF1,PTGS2,SRPX2,THBS1,EGR3,GREM1
GO: Biological Process	GO:0002763	positive regulation of myeloid leukocyte differentiation			0.003156	1	0.01355	0.1263	6	65	EVI2B,TYROBP,CCR1,CCL5,TREM2,HCLS1
GO: Biological Process	GO:0032374	regulation of cholesterol transport			0.003156	1	0.01355	0.1263	6	65	ABCA1,PLTP,APOC1,APOE,ABCG1,LEP
GO: Biological Process	GO:0001505	regulation of neurotransmitter levels			0.003208	1	0.01374	0.1281	19	425	ACP5,CLEC7A,ADORA2B,HRH1,AIF1,ICAM1,SLC1A3,IGF1,IL6,IL10,ITGB2,PTGIS,PTGS2,SDS,RGS2,MCTP1,CD36,TLR2,TLR4
GO: Biological Process	GO:2000353	positive regulation of endothelial cell apoptotic process			0.003209	1	0.01374	0.1281	4	28	CCL2,RGCC,ITGA4,THBS1
GO: Biological Process	GO:0014829	vascular associated smooth muscle contraction			0.003209	1	0.01374	0.1281	4	28	ACTA2,COMP,EDNRA,CD38
GO: Biological Process	GO:0034114	regulation of heterotypic cell-cell adhesion			0.003209	1	0.01374	0.1281	4	28	IL1RN,IL10,CD44,TNFAIP3
GO: Biological Process	GO:0010675	regulation of cellular carbohydrate metabolic process			0.003241	1	0.01387	0.1292	10	161	HRH1,HSD11B1,PLEK,RUBCNL,IGF1,IL6,PTAFR,TIGAR,NUPR1,LEP
GO: Biological Process	GO:0061450	trophoblast cell migration			0.003291	1	0.01395	0.13	3	14	MMP12,ARHGDIB,TIMP1
GO: Biological Process	GO:0097531	mast cell migration			0.003291	1	0.01395	0.13	3	14	CCL5,CCL11,RAC2
GO: Biological Process	GO:1902430	negative regulation of amyloid-beta formation			0.003291	1	0.01395	0.13	3	14	SPON1,APOE,IGF1
GO: Biological Process	GO:0031392	regulation of prostaglandin biosynthetic process			0.003291	1	0.01395	0.13	3	14	FABP5,ANXA1,PTGS2
GO: Biological Process	GO:0014831	gastro-intestinal system smooth muscle contraction			0.003291	1	0.01395	0.13	3	14	PTAFR,SULF1,KCNMA1
GO: Biological Process	GO:0035630	bone mineralization involved in bone maturation			0.003291	1	0.01395	0.13	3	14	IGF1,LEP,GREM1
GO: Biological Process	GO:0034356	NAD biosynthesis via nicotinamide riboside salvage pathway			0.003291	1	0.01395	0.13	3	14	PTGIS,PTGS2,NNMT
GO: Biological Process	GO:0001973	G protein-coupled adenosine receptor signaling pathway			0.003291	1	0.01395	0.13	3	14	ADA,ADORA2B,ADORA3
GO: Biological Process	GO:1900025	negative regulation of substrate adhesion-dependent cell spreading			0.003291	1	0.01395	0.13	3	14	CORO1C,FBLN1,POSTN
GO: Biological Process	GO:0009143	nucleoside triphosphate catabolic process			0.003291	1	0.01395	0.13	3	14	ADA,SAMHD1,SMPDL3A
GO: Biological Process	GO:0010745	negative regulation of macrophage derived foam cell differentiation			0.003291	1	0.01395	0.13	3	14	ABCA1,PPARG,ABCG1
GO: Biological Process	GO:0061042	vascular wound healing			0.003291	1	0.01395	0.13	3	14	HPSE,SERPINE1,TNFAIP3
GO: Biological Process	GO:0002674	negative regulation of acute inflammatory response			0.003291	1	0.01395	0.13	3	14	FCGR2B,PPARG,NLRP3
GO: Biological Process	GO:1903054	negative regulation of extracellular matrix organization			0.003291	1	0.01395	0.13	3	14	FAP,EMILIN1,TNFRSF1B
GO: Biological Process	GO:0006509	membrane protein ectodomain proteolysis			0.003409	1	0.0144	0.1342	5	46	APOE,IL10,TIMP1,TIMP2,TNFRSF1B
GO: Biological Process	GO:0010470	regulation of gastrulation			0.003409	1	0.0144	0.1342	5	46	COL5A1,COL5A2,IL1RN,IL10,TNFAIP3
GO: Biological Process	GO:0070266	necroptotic process			0.003409	1	0.0144	0.1342	5	46	LY96,FAS,PYGL,CD14,TLR4
GO: Biological Process	GO:1903053	regulation of extracellular matrix organization			0.003409	1	0.0144	0.1342	5	46	FAP,RGCC,IL6,EMILIN1,TNFRSF1B
GO: Biological Process	GO:0015718	monocarboxylic acid transport			0.003409	1	0.0144	0.1342	11	189	SLCO2B1,FABP4,PLIN2,ANXA1,APOE,PPARG,AQP9,LEP,THBS1,SLC16A6,CD36
GO: Biological Process	GO:0051258	protein polymerization			0.003427	1	0.01446	0.1348	15	304	AIF1,CCL11,ICAM1,GMFG,GAS7,PYCARD,MX2,NAV3,CAPG,ARPC1B,CORO1A,TLR2,HCK,HCLS1,NCKAP1L
GO: Biological Process	GO:0022008	neurogenesis			0.003509	1	0.0148	0.138	59	1866	CEBPB,SERPINF1,TWIST1,CCR2,S100A8,S100A9,CCL2,CCL5,CCL11,MMP2,COL3A1,PRRX1,FN1,ANXA1,DOCK10,GAS7,APOE,PPARG,FAS,SLC1A3,AREG,POSTN,IGF1,VCAN,IL6,CTSZ,PHACTR1,INHBA,ITGA4,ITGAM,ZEB2,NRP2,KCNMA1,NAV3,C1QA,C3,C5AR1,IL33,RAC2,LST1,DPYSL3,GRN,GPR183,RGS2,LEP,LGALS1,TIMP2,EGR2,PLXNC1,CD38,TLR2,TLR4,CD44,TREM2,DUSP10,TNFRSF1B,LYN,DCLK1,NCKAP1L
GO: Biological Process	GO:0044255	cellular lipid metabolic process			0.003516	1	0.01482	0.1381	39	1117	PLBD1,PDGFRA,CES1,FABP4,FABP5,TWIST1,PIK3CG,FGF7,ALDH1A3,FGR,PLEK,ALOX5,ALOX5AP,ANXA1,AOAH,APOC1,APOE,PPARG,ABCG1,CCN1,SDC3,FUCA1,SOAT1,MYO5A,GATA6,PTGIS,PTGS2,NOD2,SMPDL3A,GM2A,C3,ST8SIA4,TBXAS1,PLA2G7,LEP,LIPA,CD36,DHRS9,LYN
GO: Biological Process	GO:0008202	steroid metabolic process			0.003532	1	0.01488	0.1387	17	366	ABCA1,PDGFRA,CES1,ADORA2B,HRH1,HSD11B1,APOC1,APOE,ABCG1,IGF1,SOAT1,LGMN,KCNMA1,NPC1,LEP,LIPA,DHRS9
GO: Biological Process	GO:0046620	regulation of organ growth			0.003537	1	0.01489	0.1388	9	137	BASP1,AHR,COL14A1,IGF1,GATA6,STK4,CCN4,RGS2,ZFPM2
GO: Biological Process	GO:0071407	cellular response to organic cyclic compound			0.003578	1	0.01505	0.1403	26	660	ABCA1,CEBPB,SERPINF1,COLEC12,PIK3CG,AHR,HRH1,AIF1,CCL2,CCL5,MMP2,COL1A1,ANXA1,FOLR2,ICAM1,PPARG,AQP9,IGF1,IL10,INHBA,PTAFR,PTGS2,NOD2,GNA15,NPC1,LGALS1
GO: Biological Process	GO:0034599	cellular response to oxidative stress			0.003609	1	0.01517	0.1414	16	336	PDGFRA,HMOX1,AIF1,MMP2,MMP9,ANXA1,IL6,CYBB,IL10,NCF2,NCF4,BTK,THBS1,CD36,TLR4,TNFAIP3
GO: Biological Process	GO:0060143	positive regulation of syncytium formation by plasma membrane fusion			0.003658	1	0.01534	0.143	4	29	TYROBP,CXCL9,TREM2,CD53
GO: Biological Process	GO:0031954	positive regulation of protein autophosphorylation			0.003658	1	0.01534	0.143	4	29	GPNMB,RASSF2,RAP2B,GREM1
GO: Biological Process	GO:0045117	azole transmembrane transport			0.003658	1	0.01534	0.143	4	29	ADA,BTK,EDNRA,LYN
GO: Biological Process	GO:1902003	regulation of amyloid-beta formation			0.003658	1	0.01534	0.143	4	29	SPON1,APOE,ABCG1,IGF1
GO: Biological Process	GO:1903307	positive regulation of regulated secretory pathway			0.003675	1	0.0154	0.1435	6	67	ADORA2B,FCER1G,FGR,PTAFR,ITGAM,ITGB2
GO: Biological Process	GO:0006958	complement activation, classical pathway			0.003712	1	0.01554	0.1449	9	138	CR1,IGKC,IGLC1,C1QA,C1QB,C1R,C1S,C3,TRBC1
GO: Biological Process	GO:0032459	regulation of protein oligomerization			0.003747	1	0.01568	0.1461	5	47	MMP1,AIM2,APOE,FAS,JCHAIN
GO: Biological Process	GO:0110053	regulation of actin filament organization			0.003855	1	0.01612	0.1503	14	278	CCL11,PLEK,GPR65,ICAM1,RGCC,GMFG,PYCARD,CAPG,ARPC1B,CORO1A,TLR2,HCK,HCLS1,NCKAP1L
GO: Biological Process	GO:1990874	vascular associated smooth muscle cell proliferation			0.003879	1	0.0162	0.151	7	90	HMOX1,MMP2,MMP9,CNN1,PPARG,IGF1,IL10
GO: Biological Process	GO:1904705	regulation of vascular associated smooth muscle cell proliferation			0.003879	1	0.0162	0.151	7	90	HMOX1,MMP2,MMP9,CNN1,PPARG,IGF1,IL10
GO: Biological Process	GO:0010811	positive regulation of cell-substrate adhesion			0.003893	1	0.01625	0.1514	9	139	FBLN1,COL8A1,COL16A1,FN1,MMRN1,CCN1,EMILIN1,THBS1,CD36
GO: Biological Process	GO:0043388	positive regulation of DNA binding			0.003957	1	0.0165	0.1538	6	68	TWIST1,PLAUR,MMP9,PPARG,IGF1,TLR4
GO: Biological Process	GO:0051604	protein maturation			0.003985	1	0.01661	0.1548	15	309	CES1,SPON1,COMP,BAG2,CPA3,SRGN,PYCARD,CTSS,CTSZ,LGMN,RIPK2,C1R,CASP1,THBS1,SERPINE1
GO: Biological Process	GO:0061430	bone trabecula morphogenesis			0.004046	1	0.01674	0.156	3	15	MMP2,COL1A1,GREM1
GO: Biological Process	GO:0097202	activation of cysteine-type endopeptidase activity			0.004046	1	0.01674	0.156	3	15	PYCARD,LGMN,RIPK2
GO: Biological Process	GO:0002862	negative regulation of inflammatory response to antigenic stimulus			0.004046	1	0.01674	0.156	3	15	FCGR2B,IL10,NOD2
GO: Biological Process	GO:0002921	negative regulation of humoral immune response			0.004046	1	0.01674	0.156	3	15	VSIG4,FCGR2B,CR1
GO: Biological Process	GO:0033089	positive regulation of T cell differentiation in thymus			0.004046	1	0.01674	0.156	3	15	ADA,IL7R,EGR3
GO: Biological Process	GO:0045059	positive thymic T cell selection			0.004046	1	0.01674	0.156	3	15	HLA-DMA,PTPRC,DOCK2
GO: Biological Process	GO:0002371	dendritic cell cytokine production			0.004046	1	0.01674	0.156	3	15	NOD2,TLR2,TLR4
GO: Biological Process	GO:0010755	regulation of plasminogen activation			0.004046	1	0.01674	0.156	3	15	CTSZ,THBS1,SERPINE1
GO: Biological Process	GO:0035745	T-helper 2 cell cytokine production			0.004046	1	0.01674	0.156	3	15	RSAD2,IL6,NLRP3
GO: Biological Process	GO:0051547	regulation of keratinocyte migration			0.004046	1	0.01674	0.156	3	15	FGF7,MMP9,SERPINE1
GO: Biological Process	GO:0002517	T cell tolerance induction			0.004046	1	0.01674	0.156	3	15	LILRB2,CLC,CD86
GO: Biological Process	GO:0032273	positive regulation of protein polymerization			0.004082	1	0.01688	0.1573	9	140	CCL11,ICAM1,GMFG,PYCARD,NAV3,ARPC1B,CORO1A,HCK,NCKAP1L
GO: Biological Process	GO:0006692	prostanoid metabolic process			0.004107	1	0.01694	0.1579	5	48	FABP5,ANXA1,PTGIS,PTGS2,TBXAS1
GO: Biological Process	GO:0006693	prostaglandin metabolic process			0.004107	1	0.01694	0.1579	5	48	FABP5,ANXA1,PTGIS,PTGS2,TBXAS1
GO: Biological Process	GO:0030225	macrophage differentiation			0.004107	1	0.01694	0.1579	5	48	MMP9,INHBA,ITGAM,TLR2,HCLS1
GO: Biological Process	GO:0043029	T cell homeostasis			0.004107	1	0.01694	0.1579	5	48	TCIRG1,AHR,FAS,CORO1A,NCKAP1L
GO: Biological Process	GO:0002825	regulation of T-helper 1 type immune response			0.004148	1	0.01705	0.1589	4	30	CCR2,ANXA1,RIPK2,IL33
GO: Biological Process	GO:0032891	negative regulation of organic acid transport			0.004148	1	0.01705	0.1589	4	30	IL1RN,RGS2,LEP,THBS1
GO: Biological Process	GO:0034377	plasma lipoprotein particle assembly			0.004148	1	0.01705	0.1589	4	30	ABCA1,APOC1,APOE,SOAT1
GO: Biological Process	GO:0034110	regulation of homotypic cell-cell adhesion			0.004148	1	0.01705	0.1589	4	30	CCL5,SH2B3,LGALS1,LYN
GO: Biological Process	GO:0010818	T cell chemotaxis			0.004148	1	0.01705	0.1589	4	30	CCR2,PIK3CG,CCL5,GPR183
GO: Biological Process	GO:0009408	response to heat			0.004153	1	0.01706	0.159	11	194	HMOX1,MICB,CCL2,HSPA6,TFEC,BAG2,IGF1,PTGS2,THBS1,CD14,LYN
GO: Biological Process	GO:0006631	fatty acid metabolic process			0.004212	1	0.01729	0.1612	18	404	CES1,FABP4,FABP5,TWIST1,ALOX5,ALOX5AP,ANXA1,AOAH,APOC1,PPARG,MYO5A,PTGIS,PTGS2,C3,TBXAS1,LEP,LIPA,CD36
GO: Biological Process	GO:0022414	reproductive process			0.004217	1	0.0173	0.1612	53	1652	EREG,CEBPB,PDGFRA,SERPINF1,ADA,ADCY7,S100A11,FBLN1,BASP1,AHR,FGF7,PLAUR,MAFF,MMP2,MERTK,MMP9,MMP12,PLTP,VWF,COL16A1,ANXA1,FOLR2,ICAM1,PPARG,AREG,ARHGDIB,IGF1,CCN1,IL10,INHBA,GATA6,ITGA4,PTAFR,PTGDR,DCN,PTGIS,PTGS2,STK4,SULF1,EPYC,GRN,NUPR1,RGS2,LEP,EDNRA,ZFPM2,THBD,TIMP1,CD38,SERPINE1,CD44,LHFPL2,TNFAIP6
GO: Biological Process	GO:0018193	peptidyl-amino acid modification			0.004297	1	0.01762	0.1642	45	1352	EREG,PDGFRA,CD300A,CHI3L1,FKBP11,TWIST1,S100A8,S100A9,FGF7,CCL5,FGR,MERTK,ICAM1,SLA,AREG,IGF1,IL6,RASSF2,RIPK2,PTPN22,SAMSN1,DCN,ITGB2,PTGS2,ITK,NRP2,NOD2,STK4,PTPRC,BTK,RAP2B,SH2B3,LEP,EDNRA,EGR2,LOX,CD36,TLR4,CD44,TREM2,GREM1,LYN,HCK,DCLK1,HCLS1
GO: Biological Process	GO:0000003	reproduction			0.004373	1	0.01791	0.167	53	1655	EREG,CEBPB,PDGFRA,SERPINF1,ADA,ADCY7,S100A11,FBLN1,BASP1,AHR,FGF7,PLAUR,MAFF,MMP2,MERTK,MMP9,MMP12,PLTP,VWF,COL16A1,ANXA1,FOLR2,ICAM1,PPARG,AREG,ARHGDIB,IGF1,CCN1,IL10,INHBA,GATA6,ITGA4,PTAFR,PTGDR,DCN,PTGIS,PTGS2,STK4,SULF1,EPYC,GRN,NUPR1,RGS2,LEP,EDNRA,ZFPM2,THBD,TIMP1,CD38,SERPINE1,CD44,LHFPL2,TNFAIP6
GO: Biological Process	GO:0042509	regulation of tyrosine phosphorylation of STAT protein			0.004381	1	0.01793	0.1672	7	92	CCL5,IGF1,IL6,SH2B3,LEP,LYN,HCLS1
GO: Biological Process	GO:0060284	regulation of cell development			0.004392	1	0.01797	0.1675	39	1132	CORO1C,SERPINF1,CLEC7A,CCR2,S100A9,TYROBP,FBLN1,FBN1,COL14A1,CCL5,CCL11,COL3A1,PRRX1,FN1,APOE,PPARG,FAS,POSTN,IGF1,IL6,CTSZ,PHACTR1,SLAMF8,LILRB1,ZEB2,CCN4,DPYSL3,GRN,GPR183,RGS2,LGALS1,TIMP2,PLXNC1,CD38,TLR2,TREM2,DUSP10,TNFRSF1B,LYN
GO: Biological Process	GO:0010506	regulation of autophagy			0.004398	1	0.01798	0.1676	16	343	HMOX1,PYCARD,LAMP3,IL10,IL10RA,RIPK2,PTPN22,DCN,NOD2,NPC1,TIGAR,NUPR1,LEP,TLR2,TREM2,TNFAIP3
GO: Biological Process	GO:1903523	negative regulation of blood circulation			0.004493	1	0.01832	0.1708	5	49	PIK3CG,AHR,MMP2,PLN,LEP
GO: Biological Process	GO:0034383	low-density lipoprotein particle clearance			0.004493	1	0.01832	0.1708	5	49	HMOX1,SOAT1,NPC1,LIPA,CD36
GO: Biological Process	GO:0090495	low-density lipoprotein particle disassembly			0.004493	1	0.01832	0.1708	5	49	HMOX1,SOAT1,NPC1,LIPA,CD36
GO: Biological Process	GO:0010661	positive regulation of muscle cell apoptotic process			0.004493	1	0.01832	0.1708	5	49	PPARG,CXCR2,GATA6,STK4,TIGAR
GO: Biological Process	GO:0070265	necrotic cell death			0.004568	1	0.01861	0.1735	6	70	LY96,AHR,FAS,PYGL,CD14,TLR4
GO: Biological Process	GO:0014074	response to purine-containing compound			0.004569	1	0.01861	0.1735	10	169	PIK3CG,AHR,COL1A1,SELL,PPARG,AQP9,AREG,PTAFR,PTGS2,THBD
GO: Biological Process	GO:0046890	regulation of lipid biosynthetic process			0.004603	1	0.01863	0.1736	12	225	FABP5,ADORA2B,HRH1,ANXA1,APOC1,APOE,ABCG1,IGF1,CCN1,PTGS2,C3,LEP
GO: Biological Process	GO:0001822	kidney development			0.004616	1	0.01863	0.1736	15	314	PDGFRA,SERPINF1,ACTA2,FBN1,BASP1,AHR,MMP9,VCAN,CXCR2,DCN,SULF1,C3AR1,EDNRA,CD44,GREM1
GO: Biological Process	GO:0043270	positive regulation of ion transport			0.004648	1	0.01863	0.1736	16	345	CEBPB,CCR2,CXCL9,CCL2,CCR1,CCL4,CCL5,ALOX5,APOE,CTSS,PTAFR,LEP,EDNRA,LGALS3,SERPINE1,TREM2
GO: Biological Process	GO:0043406	positive regulation of MAP kinase activity			0.004649	1	0.01863	0.1736	14	284	ADORA2B,S100A12,PIK3CG,MAP3K8,FPR1,IGF1,IL1RN,RIPK2,ZEB2,NOD2,PTPRC,C5AR1,THBS1,TLR4
GO: Biological Process	GO:1905954	positive regulation of lipid localization			0.004649	1	0.01863	0.1736	7	93	ABCA1,PLTP,APOE,MSR1,ABCG1,C3,CD36
GO: Biological Process	GO:0070542	response to fatty acid			0.004649	1	0.01863	0.1736	7	93	PPARG,PTAFR,PTGDR,PTGS2,CD36,TLR2,TLR4
GO: Biological Process	GO:0090200	positive regulation of release of cytochrome c from mitochondria			0.00468	1	0.01863	0.1736	4	31	PLAUR,MMP9,FAS,PYCARD
GO: Biological Process	GO:0007263	nitric oxide mediated signal transduction			0.00468	1	0.01863	0.1736	4	31	FPR1,APOE,THBS1,CD36
GO: Biological Process	GO:0045671	negative regulation of osteoclast differentiation			0.00468	1	0.01863	0.1736	4	31	FBN1,LILRB1,LILRB4,TLR4
GO: Biological Process	GO:0120161	regulation of cold-induced thermogenesis			0.004689	1	0.01863	0.1736	9	143	CEBPB,PLAC8,FABP4,FABP5,CCR2,UCP2,LEP,CD36,TLR4
GO: Biological Process	GO:0106106	cold-induced thermogenesis			0.004689	1	0.01863	0.1736	9	143	CEBPB,PLAC8,FABP4,FABP5,CCR2,UCP2,LEP,CD36,TLR4
GO: Biological Process	GO:0032911	negative regulation of transforming growth factor beta1 production			0.004698	1	0.01863	0.1736	2	5	TYROBP,GATA6
GO: Biological Process	GO:1901203	positive regulation of extracellular matrix assembly			0.004698	1	0.01863	0.1736	2	5	RGCC,EMILIN1
GO: Biological Process	GO:0031580	membrane raft distribution			0.004698	1	0.01863	0.1736	2	5	PTPRC,DOCK2
GO: Biological Process	GO:0030451	regulation of complement activation, alternative pathway			0.004698	1	0.01863	0.1736	2	5	VSIG4,CR1
GO: Biological Process	GO:0032763	regulation of mast cell cytokine production			0.004698	1	0.01863	0.1736	2	5	HMOX1,FCER1G
GO: Biological Process	GO:0045963	negative regulation of dopamine metabolic process			0.004698	1	0.01863	0.1736	2	5	ITGAM,ITGB2
GO: Biological Process	GO:0014900	muscle hyperplasia			0.004698	1	0.01863	0.1736	2	5	HMOX1,AIF1
GO: Biological Process	GO:0002901	mature B cell apoptotic process			0.004698	1	0.01863	0.1736	2	5	ADA,CD44
GO: Biological Process	GO:0002905	regulation of mature B cell apoptotic process			0.004698	1	0.01863	0.1736	2	5	ADA,CD44
GO: Biological Process	GO:0002906	negative regulation of mature B cell apoptotic process			0.004698	1	0.01863	0.1736	2	5	ADA,CD44
GO: Biological Process	GO:0009217	purine deoxyribonucleoside triphosphate catabolic process			0.004698	1	0.01863	0.1736	2	5	ADA,SAMHD1
GO: Biological Process	GO:0034241	positive regulation of macrophage fusion			0.004698	1	0.01863	0.1736	2	5	TYROBP,TREM2
GO: Biological Process	GO:1905041	regulation of epithelium regeneration			0.004698	1	0.01863	0.1736	2	5	SERPINE1,DUSP10
GO: Biological Process	GO:0033031	positive regulation of neutrophil apoptotic process			0.004698	1	0.01863	0.1736	2	5	ANXA1,CD44
GO: Biological Process	GO:0001922	B-1 B cell homeostasis			0.004698	1	0.01863	0.1736	2	5	AHR,TNFAIP3
GO: Biological Process	GO:0090131	mesenchyme migration			0.004698	1	0.01863	0.1736	2	5	ACTA2,ACTG2
GO: Biological Process	GO:0034165	positive regulation of toll-like receptor 9 signaling pathway			0.004698	1	0.01863	0.1736	2	5	RSAD2,PTPN22
GO: Biological Process	GO:1903972	regulation of cellular response to macrophage colony-stimulating factor stimulus			0.004698	1	0.01863	0.1736	2	5	TLR2,TLR4
[truncated: 153,785 more rows]
