# Supplementary material for: Characterization of Continuous Transcriptional Heterogeneity in High-Risk Blastemal-Type Wilms’ Tumors Using Unsupervised Machine Learning
Source: Int J Mol Sci. 2023 Feb 9;24(4):3532. doi: 10.3390/ijms24043532 (PMC9965420; doi:10.3390/ijms24043532)
Supplement: Supplementary file 1 [file ijms-24-03532-s001.zip › Table S5 - GO enrichment epithilialArc.xlsx]

## Sheet: Genes list
A1CF
ABCB1
ACADL
ACADSB
ACAT1
ACE2
ACOX2
ACPP
ACSF2
ACSM3
ADGRG1
ADH6
ADIRF
AFM
AGMAT
AK4
AKR1C3
AKR7A3
ALDH1L1
ALDH6A1
ALDH8A1
ALDOB
ANGPTL3
ANK2
ANK3
ANPEP
ANXA3
AOC1
AOX1
APOM
AQP1
AQP3
ARG2
ARHGAP24
ARSL						1
ASPA
ASS1
ATP1A1
ATP1B1
ATP6V0A4
AZGP1
BBOX1
BHMT
BHMT2
C1orf115
C21orf62
C4orf19
CA10
CA12
CA2
CALB1
CCDC198
CCN6
CDH1
CDH16
CDH6
CDS1
CHL1
CLCNKB
CLDN10
CLDN7
CLDN8
CLEC4M
CLIC5
CLMN
CLU
COBL
COBLL1
COL4A3
COL4A4
CRIM1
CRTAC1
CRYAB
CRYL1
CRYZ
CTXND1
CUBN
CWH43
CX3CL1
CXCL14
CYB5A
CYP3A5
CYP4F3
DAO
DCXR
DDAH1
DDC
DEFB1
DIO1
DIRAS2
DIRAS3
DNAJC6
DPYS
DSC1
ECHDC3
EFHD1
EFNA1
EGF
EGOT
EHHADH
ELF3
EMX2
ENPEP
EPHX2
EPS8L2
ERBB3
ERBB4
ESRRG
F2RL1
FABP1
FCGBP
FGB
FGF1
FGF9
FGFR3
FMO1
FMO4
FMO5
FOLH1B
FRK
FXYD2
G6PC
GABRA2
GAD1
GALNT11
GALNT14
GALNT3
GATA3
GATM
GBA3
GIPC2
GLDC
GLYAT
GOT1
GPC4
GPX3
GRAMD1C
GRB14
GULP1
HAO2
HGD
HLF
HMGCS2
HNF1B
HPD
HPGD
HPN
HSD11B2
HSD17B2
HSPA12A
HYAL1
IL17RB
IMPA2
IRF6
KANSL1L
KCNJ1
KCNJ15
KCNJ16
KHK
KL
KLK1
KNG1
KRT7
KRT8
LGALS2
LHX1
LINC00472
LIPC
LRP2
LRRC19
LRRC2
LZTS3
MAGI2
MAL
MAOA
MAOB
MAP7
MECOM
MET
MFAP3L
MME
MPPED2
MSRA
MST1L
MT1E
MT1F
MT1G
MT1H
MT1X
MTTP
MUC1
NAP1L2
NAT8B
NEBL
NELL1
NOX4
NPHS1
NPHS2
NPR1
NPR3
NPY1R
NR1H4
NR3C2
OGDHL
OLFML2A
OSBPL3
P3H2
PBLD
PCCA
PCK1
PCK2
PCP4
PDE1A
PDE8B
PDZK1
PDZK1IP1
PERP
PHYH
PIP5K1B
PIPOX
PLCL1
PLG
PLLP
PLPPR1
PLS1
PODXL
PPARGC1A
PPL
PPP1R1A
PRODH2
PRR15L
PTGER3
PTH1R
PTPRO
PVALB
RAB17
RAB25
RALYL
RAP1GAP
RBM47
RBP4
REEP5
REN
RETREG1
RGN
RHCG
RIDA
RNF128
S100A2
SBSPON
SDC4
SELENBP1
SERPINA5
SERPINA6
SERPINI1
SH3GL2
SH3YL1
SHANK2
SLC10A2
SLC12A1
SLC12A3
SLC13A1
SLC13A3
SLC14A1
SLC15A2
SLC16A4
SLC17A1
SLC17A3
SLC22A2
SLC22A5
SLC22A6
SLC26A4
SLC27A2
SLC2A2
SLC34A1
SLC3A1
SLC44A4
SLC4A1
SLC4A4
SLC5A12
SLC6A13
SLC7A9
SLCO4C1
SLPI
SORBS2
SOSTDC1
SOX9
SPINK1
SULT1C2
TACSTD2
TBX2
TFAP2A
TFAP2B
TFCP2L1
THSD7A
TMEM30B
TOM1L1
TOX3
TPD52L1
TRHDE
TRPM3
TSPAN1
TSPAN12
TSPAN8
TYRP1
UGT2A3
UGT2B28
UMOD
UPB1
VAV3
XPNPEP2
ZNF204P

## Sheet: Toppgene results
Category	ID	Name	Selected	Source	p-value	q-value Bonferroni	q-value FDR B&H	q-value FDR B&Y	Hit Count in Query List	Hit Count in Genome	Hit in Query List
GO: Molecular Function	GO:0016491	oxidoreductase activity			9.631e-14	1.025e-10	1.025e-10	7.734e-10	51	983	HGD,DDAH1,AOC1,MAOA,ACADL,MAOB,ACADSB,CYP3A5,ALDH8A1,PIPOX,DAO,ALDH1L1,ACOX2,ADH6,TYRP1,PPARGC1A,PRODH2,PHYH,HPD,GLDC,HPGD,DIO1,KHK,HSD11B2,HSD17B2,ALDOB,BBOX1,ALDH6A1,NPR3,FMO1,FMO4,FMO5,SELENBP1,AOX1,GPX3,NOX4,SLC4A1,ARG2,MSRA,CRYL1,RGN,CRYZ,EHHADH,P3H2,AKR7A3,AKR1C3,OGDHL,CYP4F3,HAO2,DCXR,CYB5A
GO: Molecular Function	GO:0005215	transporter activity			8.938e-10	9.51e-07	4.755e-07	3.589e-06	57	1505	TMEM30B,SLC17A3,AZGP1,SLC26A4,PDZK1,FABP1,ABCB1,APOM,PPARGC1A,SLC22A6,CLIC5,CLCNKB,TRPM3,KCNJ1,HPN,KCNJ15,KCNJ16,SLC5A12,SLC27A2,RHCG,ANK2,ANK3,ANXA3,RBP4,SLC13A3,SLC44A4,AQP1,AQP3,SLC2A2,SLC3A1,SLC4A1,SLC7A9,SLC6A13,RGN,SLC10A2,SHANK2,SLC12A1,SLC12A3,SLCO4C1,SLC13A1,SLC16A4,SLC14A1,SLC15A2,SLC17A1,SLC34A1,OSBPL3,SLC22A2,SLC22A5,ATP6V0A4,MTTP,ATP1A1,SLC4A4,ATP1B1,FXYD2,GRAMD1C,CYB5A,GABRA2
GO: Molecular Function	GO:0008509	anion transmembrane transporter activity			2.039e-09	2.169e-06	7.232e-07	5.458e-06	25	374	SLC17A3,SLC26A4,ABCB1,SLC22A6,CLIC5,CLCNKB,SLC5A12,SLC27A2,SLC13A3,SLC44A4,SLC2A2,SLC3A1,SLC4A1,SLC7A9,SLC6A13,SLC10A2,SLC12A1,SLC12A3,SLCO4C1,SLC13A1,SLC16A4,SLC17A1,SLC34A1,SLC4A4,GABRA2
GO: Molecular Function	GO:0015075	ion transmembrane transporter activity			3.219e-09	3.425e-06	8.562e-07	6.462e-06	47	1150	SLC17A3,SLC26A4,PDZK1,ABCB1,PPARGC1A,SLC22A6,CLIC5,CLCNKB,TRPM3,KCNJ1,HPN,KCNJ15,KCNJ16,SLC5A12,SLC27A2,RHCG,ANK2,ANK3,ANXA3,SLC13A3,SLC44A4,AQP1,SLC2A2,SLC3A1,SLC4A1,SLC7A9,SLC6A13,RGN,SLC10A2,SHANK2,SLC12A1,SLC12A3,SLCO4C1,SLC13A1,SLC16A4,SLC15A2,SLC17A1,SLC34A1,SLC22A2,SLC22A5,ATP6V0A4,ATP1A1,SLC4A4,ATP1B1,FXYD2,CYB5A,GABRA2
GO: Molecular Function	GO:0022857	transmembrane transporter activity			6.878e-09	7.318e-06	1.464e-06	1.105e-05	51	1340	SLC17A3,AZGP1,SLC26A4,PDZK1,ABCB1,PPARGC1A,SLC22A6,CLIC5,CLCNKB,TRPM3,KCNJ1,HPN,KCNJ15,KCNJ16,SLC5A12,SLC27A2,RHCG,ANK2,ANK3,ANXA3,RBP4,SLC13A3,SLC44A4,AQP1,AQP3,SLC2A2,SLC3A1,SLC4A1,SLC7A9,SLC6A13,RGN,SLC10A2,SHANK2,SLC12A1,SLC12A3,SLCO4C1,SLC13A1,SLC16A4,SLC14A1,SLC15A2,SLC17A1,SLC34A1,SLC22A2,SLC22A5,ATP6V0A4,ATP1A1,SLC4A4,ATP1B1,FXYD2,CYB5A,GABRA2
GO: Molecular Function	GO:0050660	flavin adenine dinucleotide binding			8.29e-09	8.821e-06	1.47e-06	1.11e-05	12	83	MAOA,ACADL,MAOB,ACADSB,DAO,ACOX2,PRODH2,FMO1,FMO4,FMO5,AOX1,NOX4
GO: Molecular Function	GO:0008514	organic anion transmembrane transporter activity			1.711e-08	1.821e-05	2.601e-06	1.963e-05	18	219	SLC17A3,SLC26A4,SLC22A6,SLC5A12,SLC27A2,SLC13A3,SLC44A4,SLC2A2,SLC3A1,SLC4A1,SLC7A9,SLC6A13,SLC10A2,SLCO4C1,SLC13A1,SLC16A4,SLC17A1,SLC4A4
GO: Molecular Function	GO:0015291	secondary active transmembrane transporter activity			2.282e-08	2.428e-05	3.035e-06	2.291e-05	19	249	SLC17A3,SLC26A4,SLC22A6,SLC5A12,SLC13A3,SLC4A1,SLC6A13,SLC10A2,SLC12A1,SLC12A3,SLCO4C1,SLC13A1,SLC16A4,SLC15A2,SLC17A1,SLC34A1,SLC22A5,SLC4A4,ATP1B1
GO: Molecular Function	GO:0022804	active transmembrane transporter activity			2.743e-08	2.919e-05	3.122e-06	2.357e-05	24	395	SLC17A3,SLC26A4,ABCB1,SLC22A6,SLC5A12,SLC13A3,SLC4A1,SLC6A13,RGN,SLC10A2,SLC12A1,SLC12A3,SLCO4C1,SLC13A1,SLC16A4,SLC15A2,SLC17A1,SLC34A1,SLC22A5,ATP6V0A4,ATP1A1,SLC4A4,ATP1B1,FXYD2
GO: Molecular Function	GO:0022853	active ion transmembrane transporter activity			2.934e-08	3.122e-05	3.122e-06	2.357e-05	20	280	SLC17A3,SLC26A4,SLC22A6,SLC5A12,SLC13A3,SLC4A1,SLC6A13,RGN,SLC10A2,SLC12A1,SLC12A3,SLCO4C1,SLC13A1,SLC15A2,SLC34A1,ATP6V0A4,ATP1A1,SLC4A4,ATP1B1,FXYD2
GO: Molecular Function	GO:0015318	inorganic molecular entity transmembrane transporter activity			4.41e-08	4.693e-05	4.266e-06	3.22e-05	43	1089	SLC17A3,SLC26A4,ABCB1,PPARGC1A,SLC22A6,CLIC5,CLCNKB,TRPM3,KCNJ1,HPN,KCNJ15,KCNJ16,SLC5A12,SLC27A2,ANK2,ANK3,ANXA3,RBP4,SLC13A3,AQP1,AQP3,SLC3A1,SLC4A1,SLC7A9,SLC6A13,RGN,SLC10A2,SHANK2,SLC12A1,SLC12A3,SLC13A1,SLC16A4,SLC14A1,SLC15A2,SLC17A1,SLC34A1,ATP6V0A4,ATP1A1,SLC4A4,ATP1B1,FXYD2,CYB5A,GABRA2
GO: Molecular Function	GO:0031406	carboxylic acid binding			9.091e-08	9.673e-05	7.611e-06	5.744e-05	21	329	RIDA,GAD1,DDAH1,PTGER3,DDC,ACOX2,FABP1,PPARGC1A,PHYH,GLDC,HPGD,NR1H4,GOT1,DPYS,ANXA3,SHANK2,P3H2,ASS1,PCCA,SERPINA5,PCK1
GO: Molecular Function	GO:0015293	symporter activity			9.299e-08	9.894e-05	7.611e-06	5.744e-05	14	145	SLC17A3,SLC5A12,SLC13A3,SLC6A13,SLC10A2,SLC12A1,SLC12A3,SLC13A1,SLC16A4,SLC15A2,SLC17A1,SLC34A1,SLC22A5,SLC4A4
GO: Molecular Function	GO:0043177	organic acid binding			1.744e-07	0.0001855	1.325e-05	0.0001	21	342	RIDA,GAD1,DDAH1,PTGER3,DDC,ACOX2,FABP1,PPARGC1A,PHYH,GLDC,HPGD,NR1H4,GOT1,DPYS,ANXA3,SHANK2,P3H2,ASS1,PCCA,SERPINA5,PCK1
GO: Molecular Function	GO:0015370	solute:sodium symporter activity			2.499e-07	0.0002659	1.773e-05	0.0001338	10	73	SLC17A3,SLC5A12,SLC13A3,SLC6A13,SLC10A2,SLC12A1,SLC12A3,SLC13A1,SLC34A1,SLC4A4
GO: Molecular Function	GO:0042803	protein homodimerization activity			4.43e-07	0.0004714	2.946e-05	0.0002224	39	1019	EPHX2,RIDA,ERBB3,ERBB4,UPB1,AOC1,IMPA2,MAOB,ACAT1,ACP3,MECOM,PTH1R,ACOX2,OLFML2A,TYRP1,SLC22A6,PTPRO,GLDC,HPGD,PVALB,TOX3,NR3C2,MME,HNF1B,NPR3,RAP1GAP,SH3GL2,AOX1,GRB14,CUBN,TFAP2A,TFAP2B,SLC4A1,CRYAB,CRYL1,SLC34A1,CDH1,CDH6,TPD52L1
GO: Molecular Function	GO:0042802	identical protein binding			5.783e-07	0.0006153	3.619e-05	0.0002732	61	1997	EPHX2,RIDA,HGD,ERBB3,ERBB4,UPB1,AOC1,GIPC2,IMPA2,MAOB,ACAT1,ACP3,MECOM,PBLD,PTH1R,ACOX2,S100A2,DEFB1,MET,NELL1,OLFML2A,TYRP1,SLC22A6,PTPRO,GLDC,HPGD,PVALB,TOX3,NR3C2,FGFR3,MME,ALDOB,BBOX1,SDC4,RHCG,HNF1B,NPR3,RAP1GAP,SH3GL2,AOX1,RALYL,GRB14,CLDN7,CUBN,AQP1,TFAP2A,TFAP2B,CLDN10,CLDN8,SLC4A1,CRYAB,CRYL1,SLC34A1,ASPA,ASS1,AKR7A3,SLC4A4,CDH1,CDH6,DCXR,TPD52L1
GO: Molecular Function	GO:0019842	vitamin binding			7.428e-07	0.0007904	4.357e-05	0.0003288	13	147	GAD1,DDC,PHYH,KL,GLDC,AFM,GOT1,CALB1,RBP4,CUBN,P3H2,OGDHL,PCCA
GO: Molecular Function	GO:0046914	transition metal ion binding			7.78e-07	0.0008278	4.357e-05	0.0003288	41	1125	RIDA,UPB1,DDAH1,AOC1,GALNT3,CYP3A5,ESRRG,GATA3,CA10,BHMT,S100A2,ADH6,PHYH,BHMT2,NR3C2,MME,BBOX1,MPPED2,KNG1,NR1H4,CA2,TRHDE,CA12,DPYS,CALB1,ANPEP,AOX1,ARG2,ACE2,MT1E,MT1F,MT1G,MT1H,RGN,CRYZ,MT1X,P3H2,CYP4F3,ENPEP,PCK1,PCK2
GO: Molecular Function	GO:0015103	inorganic anion transmembrane transporter activity			8.795e-07	0.0009358	4.586e-05	0.0003461	14	174	SLC17A3,SLC26A4,ABCB1,SLC22A6,CLIC5,CLCNKB,SLC4A1,SLC12A1,SLC12A3,SLC13A1,SLC17A1,SLC34A1,SLC4A4,GABRA2
GO: Molecular Function	GO:0015294	solute:cation symporter activity			9.051e-07	0.000963	4.586e-05	0.0003461	11	104	SLC17A3,SLC5A12,SLC13A3,SLC6A13,SLC10A2,SLC12A1,SLC12A3,SLC13A1,SLC15A2,SLC34A1,SLC4A4
GO: Molecular Function	GO:0005496	steroid binding			1.323e-06	0.001407	6.396e-05	0.0004828	11	108	ESRRG,KL,NR3C2,HSD11B2,NR1H4,CALB1,SERPINA6,OSBPL3,SLC22A2,ATP1A1,GRAMD1C
GO: Molecular Function	GO:0015077	monovalent inorganic cation transmembrane transporter activity			8.055e-06	0.008571	0.0003727	0.002813	23	506	SLC17A3,KCNJ1,HPN,KCNJ15,KCNJ16,SLC5A12,ANK2,ANK3,SLC13A3,AQP1,SLC6A13,SLC10A2,SLC12A1,SLC12A3,SLC13A1,SLC15A2,SLC34A1,ATP6V0A4,ATP1A1,SLC4A4,ATP1B1,FXYD2,CYB5A
GO: Molecular Function	GO:0046983	protein dimerization activity			9.009e-06	0.009586	0.000392	0.002959	48	1557	EPHX2,SOX9,RIDA,GAD1,ERBB3,ERBB4,UPB1,AOC1,IMPA2,MAOB,ACAT1,ACP3,GATA3,DAO,MECOM,PTH1R,ACOX2,MET,OLFML2A,TYRP1,SLC22A6,PTPRO,GLDC,HPGD,PVALB,TOX3,NR3C2,MME,NR1H4,HNF1B,NPR3,RAP1GAP,SH3GL2,AOX1,RBP4,GRB14,CUBN,TFAP2A,TFAP2B,SLC3A1,SLC4A1,CRYAB,CRYL1,SLC34A1,MTTP,CDH1,CDH6,TPD52L1
GO: Molecular Function	GO:0005342	organic acid transmembrane transporter activity			9.659e-06	0.01028	0.000392	0.002959	12	158	SLC17A3,SLC26A4,SLC5A12,SLC27A2,SLC13A3,SLC3A1,SLC7A9,SLC6A13,SLC10A2,SLC13A1,SLC16A4,SLC17A1
GO: Molecular Function	GO:0046943	carboxylic acid transmembrane transporter activity			9.659e-06	0.01028	0.000392	0.002959	12	158	SLC17A3,SLC26A4,SLC5A12,SLC27A2,SLC13A3,SLC3A1,SLC7A9,SLC6A13,SLC10A2,SLC13A1,SLC16A4,SLC17A1
GO: Molecular Function	GO:0015081	sodium ion transmembrane transporter activity			9.947e-06	0.01058	0.000392	0.002959	14	214	SLC17A3,SLC5A12,ANK3,SLC13A3,SLC6A13,SLC10A2,SLC12A1,SLC12A3,SLC13A1,SLC34A1,ATP1A1,SLC4A4,ATP1B1,FXYD2
GO: Molecular Function	GO:0016638	oxidoreductase activity, acting on the CH-NH2 group of donors			2.172e-05	0.02311	0.0007939	0.005992	5	22	AOC1,MAOA,MAOB,DAO,GLDC
GO: Molecular Function	GO:0008324	cation transmembrane transporter activity			2.178e-05	0.02318	0.0007939	0.005992	32	898	SLC17A3,PPARGC1A,TRPM3,KCNJ1,HPN,KCNJ15,KCNJ16,SLC5A12,RHCG,ANK2,ANK3,ANXA3,SLC13A3,SLC44A4,AQP1,SLC6A13,RGN,SLC10A2,SHANK2,SLC12A1,SLC12A3,SLC13A1,SLC15A2,SLC34A1,SLC22A2,SLC22A5,ATP6V0A4,ATP1A1,SLC4A4,ATP1B1,FXYD2,CYB5A
GO: Molecular Function	GO:0016705	oxidoreductase activity, acting on paired donors, with incorporation or reduction of molecular oxygen			2.238e-05	0.02382	0.0007939	0.005992	14	230	DDAH1,CYP3A5,TYRP1,PHYH,BBOX1,NPR3,FMO1,FMO4,FMO5,ARG2,P3H2,AKR1C3,CYP4F3,CYB5A
GO: Molecular Function	GO:0004499	N,N-dimethylaniline monooxygenase activity			4.001e-05	0.04257	0.001373	0.01036	3	5	FMO1,FMO4,FMO5
GO: Molecular Function	GO:0016614	oxidoreductase activity, acting on CH-OH group of donors			7.026e-05	0.07476	0.002336	0.01763	10	136	ADH6,HPGD,HSD11B2,HSD17B2,CRYL1,EHHADH,AKR7A3,AKR1C3,HAO2,DCXR
GO: Molecular Function	GO:0005343	organic acid:sodium symporter activity			7.491e-05	0.07971	0.002415	0.01823	5	28	SLC5A12,SLC13A3,SLC6A13,SLC10A2,SLC13A1
GO: Molecular Function	GO:0008270	zinc ion binding			0.000104	0.1106	0.003254	0.02456	29	845	UPB1,DDAH1,AOC1,ESRRG,GATA3,CA10,BHMT,ADH6,BHMT2,NR3C2,MME,BBOX1,KNG1,NR1H4,CA2,TRHDE,CA12,DPYS,CALB1,ANPEP,ACE2,MT1E,MT1F,MT1G,MT1H,RGN,CRYZ,MT1X,ENPEP
GO: Molecular Function	GO:0008131	primary amine oxidase activity			0.0001367	0.1455	0.004156	0.03137	3	7	AOC1,MAOA,MAOB
GO: Molecular Function	GO:0016641	oxidoreductase activity, acting on the CH-NH2 group of donors, oxygen as acceptor			0.0001669	0.1775	0.004864	0.03671	4	18	AOC1,MAOA,MAOB,DAO
GO: Molecular Function	GO:0008519	ammonium transmembrane transporter activity			0.0001694	0.1803	0.004864	0.03671	5	33	RHCG,SLC44A4,AQP1,SLC22A2,SLC22A5
GO: Molecular Function	GO:0005319	lipid transporter activity			0.000177	0.1883	0.004864	0.03671	10	152	TMEM30B,FABP1,ABCB1,APOM,SLC27A2,RBP4,SLC10A2,OSBPL3,MTTP,GRAMD1C
GO: Molecular Function	GO:1901681	sulfur compound binding			0.0001783	0.1897	0.004864	0.03671	14	279	AOC1,ACADL,ADGRG1,CCN6,NELL1,ANGPTL3,FGF1,FGF9,ALDH6A1,KNG1,LIPC,OGDHL,PCCA,SERPINA5
GO: Molecular Function	GO:0016616	oxidoreductase activity, acting on the CH-OH group of donors, NAD or NADP as acceptor			0.0002009	0.2138	0.005344	0.04033	9	126	ADH6,HPGD,HSD11B2,HSD17B2,CRYL1,EHHADH,AKR7A3,AKR1C3,DCXR
GO: Molecular Function	GO:0016709	oxidoreductase activity, acting on paired donors, with incorporation or reduction of molecular oxygen, NAD(P)H as one donor, and incorporation of one atom of oxygen			0.0002086	0.222	0.005415	0.04087	8	100	DDAH1,NPR3,FMO1,FMO4,FMO5,ARG2,AKR1C3,CYP4F3
GO: Molecular Function	GO:1901682	sulfur compound transmembrane transporter activity			0.0002257	0.2402	0.005718	0.04316	5	35	SLC26A4,SLC44A4,SLC3A1,SLC7A9,SLC13A1
GO: Molecular Function	GO:0022890	inorganic cation transmembrane transporter activity			0.0002539	0.2702	0.006033	0.04553	28	847	SLC17A3,PPARGC1A,TRPM3,KCNJ1,HPN,KCNJ15,KCNJ16,SLC5A12,ANK2,ANK3,ANXA3,SLC13A3,AQP1,SLC6A13,RGN,SLC10A2,SHANK2,SLC12A1,SLC12A3,SLC13A1,SLC15A2,SLC34A1,ATP6V0A4,ATP1A1,SLC4A4,ATP1B1,FXYD2,CYB5A
GO: Molecular Function	GO:0047150	betaine-homocysteine S-methyltransferase activity			0.0002611	0.2778	0.006033	0.04553	2	2	BHMT,BHMT2
GO: Molecular Function	GO:0004611	phosphoenolpyruvate carboxykinase activity			0.0002611	0.2778	0.006033	0.04553	2	2	PCK1,PCK2
GO: Molecular Function	GO:0004613	phosphoenolpyruvate carboxykinase (GTP) activity			0.0002611	0.2778	0.006033	0.04553	2	2	PCK1,PCK2
GO: Molecular Function	GO:0033218	amide binding			0.0002665	0.2835	0.006033	0.04553	20	515	ACADL,CLEC4M,PTGER3,F2RL1,PTH1R,CLU,KCNJ1,MME,ALDH6A1,NR1H4,TRHDE,NPR1,NPR3,NPY1R,ANPEP,SLC7A9,CRYAB,MTTP,PCCA,ENPEP
GO: Molecular Function	GO:0030492	hemoglobin binding			0.0003204	0.3409	0.007101	0.0536	3	9	CUBN,SLC4A1,LRP2
GO: Molecular Function	GO:0015079	potassium ion transmembrane transporter activity			0.0003748	0.3987	0.008069	0.0609	12	231	KCNJ1,HPN,KCNJ15,KCNJ16,ANK2,ANK3,AQP1,SLC12A1,SLC12A3,ATP1A1,ATP1B1,FXYD2
GO: Molecular Function	GO:0030506	ankyrin binding			0.0003792	0.4035	0.008069	0.0609	4	22	RHCG,SLC4A1,ATP1A1,CDH1
GO: Molecular Function	GO:0016831	carboxy-lyase activity			0.0004285	0.4559	0.008733	0.06591	5	40	GAD1,DDC,GOT1,PCK1,PCK2
GO: Molecular Function	GO:0004497	monooxygenase activity			0.000435	0.4629	0.008733	0.06591	10	170	DDAH1,CYP3A5,TYRP1,NPR3,FMO1,FMO4,FMO5,ARG2,AKR1C3,CYP4F3
GO: Molecular Function	GO:0016903	oxidoreductase activity, acting on the aldehyde or oxo group of donors			0.000435	0.4629	0.008733	0.06591	10	170	ALDH8A1,ALDH1L1,PPARGC1A,KHK,ALDOB,ALDH6A1,AOX1,SLC4A1,AKR1C3,OGDHL
GO: Molecular Function	GO:0008430	selenium binding			0.0004522	0.4812	0.00891	0.06725	3	10	DIO1,SELENBP1,GPX3
GO: Molecular Function	GO:0008235	metalloexopeptidase activity			0.0004711	0.5012	0.009113	0.06878	6	62	TRHDE,ANPEP,XPNPEP2,ACE2,FOLH1B,ENPEP
GO: Molecular Function	GO:0016829	lyase activity			0.0004875	0.5187	0.009263	0.06991	21	581	GAD1,ADGRG1,PTGER3,CA10,DDC,PTH1R,PPARGC1A,GLDC,KHK,ALDOB,GOT1,CA2,CA12,NPR1,NPR3,NPY1R,SLC4A1,EHHADH,OGDHL,PCK1,PCK2
GO: Molecular Function	GO:0070006	metalloaminopeptidase activity			0.0005371	0.5714	0.01003	0.07567	4	24	TRHDE,ANPEP,XPNPEP2,ENPEP
GO: Molecular Function	GO:0046873	metal ion transmembrane transporter activity			0.0005706	0.6071	0.0103	0.07776	22	630	SLC17A3,TRPM3,KCNJ1,HPN,KCNJ15,KCNJ16,SLC5A12,ANK2,ANK3,SLC13A3,AQP1,SLC6A13,RGN,SLC10A2,SLC12A1,SLC12A3,SLC13A1,SLC34A1,ATP1A1,SLC4A4,ATP1B1,FXYD2
GO: Molecular Function	GO:0008238	exopeptidase activity			0.0005713	0.6079	0.0103	0.07776	8	116	HPN,MME,TRHDE,ANPEP,XPNPEP2,ACE2,FOLH1B,ENPEP
GO: Molecular Function	GO:0008289	lipid binding			0.0005866	0.6242	0.0104	0.07852	26	804	RIDA,MAL,ESRRG,ACOX2,FABP1,SH3YL1,APOM,KL,KCNJ1,NR3C2,MME,HSD11B2,ALDOB,NR1H4,CALB1,ANXA3,SH3GL2,RBP4,SERPINA6,LIPC,OSBPL3,SLC22A2,MTTP,ATP1A1,GRAMD1C,SERPINA5
GO: Molecular Function	GO:1901618	organic hydroxy compound transmembrane transporter activity			0.0006712	0.7141	0.01167	0.08805	5	44	SLC5A12,RBP4,AQP1,AQP3,SLC10A2
GO: Molecular Function	GO:0008201	heparin binding			0.0006801	0.7236	0.01167	0.08805	10	180	AOC1,ADGRG1,CCN6,NELL1,ANGPTL3,FGF1,FGF9,KNG1,LIPC,SERPINA5
GO: Molecular Function	GO:0016597	amino acid binding			0.0006908	0.735	0.01167	0.08805	9	149	GAD1,DDAH1,DDC,PPARGC1A,GLDC,DPYS,ANXA3,SHANK2,ASS1
GO: Molecular Function	GO:0009674	potassium:sodium symporter activity			0.0007626	0.8114	0.01229	0.09278	2	3	SLC12A1,SLC12A3
GO: Molecular Function	GO:0008511	sodium:potassium:chloride symporter activity			0.0007626	0.8114	0.01229	0.09278	2	3	SLC12A1,SLC12A3
GO: Molecular Function	GO:0016941	natriuretic peptide receptor activity			0.0007626	0.8114	0.01229	0.09278	2	3	NPR1,NPR3
GO: Molecular Function	GO:0030955	potassium ion binding			0.0008095	0.8613	0.01267	0.0956	3	12	KCNJ1,ATP1A1,ATP1B1
GO: Molecular Function	GO:0016813	hydrolase activity, acting on carbon-nitrogen (but not peptide) bonds, in linear amidines			0.0008095	0.8613	0.01267	0.0956	3	12	DDAH1,ARG2,AGMAT
GO: Molecular Function	GO:0016830	carbon-carbon lyase activity			0.0008493	0.9037	0.0131	0.09885	7	95	GAD1,DDC,KHK,ALDOB,GOT1,PCK1,PCK2
GO: Molecular Function	GO:0015373	anion:sodium symporter activity			0.00104	1	0.01537	0.116	3	13	SLC12A1,SLC12A3,SLC13A1
GO: Molecular Function	GO:0005452	inorganic anion exchanger activity			0.00104	1	0.01537	0.116	3	13	SLC22A6,SLC4A1,SLC4A4
GO: Molecular Function	GO:0016725	oxidoreductase activity, acting on CH or CH2 groups			0.00104	1	0.01537	0.116	3	13	CYP3A5,ACOX2,AOX1
GO: Molecular Function	GO:0016620	oxidoreductase activity, acting on the aldehyde or oxo group of donors, NAD or NADP as acceptor			0.001196	1	0.01744	0.1316	9	161	ALDH8A1,ALDH1L1,PPARGC1A,KHK,ALDOB,ALDH6A1,SLC4A1,AKR1C3,OGDHL
GO: Molecular Function	GO:0005391	sodium:potassium-exchanging ATPase activity			0.001308	1	0.01855	0.14	3	14	ATP1A1,ATP1B1,FXYD2
GO: Molecular Function	GO:0005372	water transmembrane transporter activity			0.001308	1	0.01855	0.14	3	14	AQP1,AQP3,SLC14A1
GO: Molecular Function	GO:0015184	L-cystine transmembrane transporter activity			0.001509	1	0.02085	0.1574	2	4	SLC3A1,SLC7A9
GO: Molecular Function	GO:0140031	phosphorylation-dependent protein binding			0.001509	1	0.02085	0.1574	2	4	ANK2,ANK3
GO: Molecular Function	GO:0005326	neurotransmitter transmembrane transporter activity			0.001577	1	0.02149	0.1622	5	53	SLC13A3,SLC44A4,AQP1,SLC6A13,SLC22A2
GO: Molecular Function	GO:0008554	sodium transmembrane transporter activity, phosphorylative mechanism			0.001616	1	0.02149	0.1622	3	15	ATP1A1,ATP1B1,FXYD2
GO: Molecular Function	GO:0008556	potassium transmembrane transporter activity, phosphorylative mechanism			0.001616	1	0.02149	0.1622	3	15	ATP1A1,ATP1B1,FXYD2
GO: Molecular Function	GO:0008028	monocarboxylic acid transmembrane transporter activity			0.001716	1	0.02253	0.1701	5	54	SLC5A12,SLC27A2,SLC6A13,SLC10A2,SLC16A4
GO: Molecular Function	GO:0003996	acyl-CoA ligase activity			0.001965	1	0.02519	0.1901	3	16	ACSM3,SLC27A2,ACSF2
GO: Molecular Function	GO:0004089	carbonate dehydratase activity			0.001965	1	0.02519	0.1901	3	16	CA10,CA2,CA12
GO: Molecular Function	GO:0015662	ion transmembrane transporter activity, phosphorylative mechanism			0.002019	1	0.02557	0.193	5	56	RGN,ATP6V0A4,ATP1A1,ATP1B1,FXYD2
GO: Molecular Function	GO:0071949	FAD binding			0.002066	1	0.02587	0.1952	4	34	DAO,ACOX2,PRODH2,AOX1
GO: Molecular Function	GO:0042277	peptide binding			0.002161	1	0.02674	0.2018	16	441	CLEC4M,PTGER3,F2RL1,PTH1R,CLU,KCNJ1,MME,NR1H4,TRHDE,NPR1,NPR3,NPY1R,ANPEP,SLC7A9,CRYAB,ENPEP
GO: Molecular Function	GO:0004866	endopeptidase inhibitor activity			0.00221	1	0.02703	0.204	9	176	CRIM1,SPINK1,SERPINI1,KNG1,COL4A3,SERPINA6,TFAP2B,SLPI,SERPINA5
GO: Molecular Function	GO:0033293	monocarboxylic acid binding			0.002322	1	0.02808	0.2119	6	84	RIDA,ACOX2,FABP1,NR1H4,PCCA,SERPINA5
GO: Molecular Function	GO:0050354	triokinase activity			0.002488	1	0.02909	0.2196	2	5	KHK,ALDOB
GO: Molecular Function	GO:0061609	fructose-1-phosphate aldolase activity			0.002488	1	0.02909	0.2196	2	5	KHK,ALDOB
GO: Molecular Function	GO:0004957	prostaglandin E receptor activity			0.002488	1	0.02909	0.2196	2	5	PTGER3,HPGD
GO: Molecular Function	GO:0019199	transmembrane receptor protein kinase activity			0.002568	1	0.0297	0.2242	7	115	ERBB3,ERBB4,CRIM1,MET,FGFR3,SOSTDC1,EGF
GO: Molecular Function	GO:0030414	peptidase inhibitor activity			0.002873	1	0.03252	0.2455	9	183	CRIM1,SPINK1,SERPINI1,KNG1,COL4A3,SERPINA6,TFAP2B,SLPI,SERPINA5
GO: Molecular Function	GO:0061135	endopeptidase regulator activity			0.002873	1	0.03252	0.2455	9	183	CRIM1,SPINK1,SERPINI1,KNG1,COL4A3,SERPINA6,TFAP2B,SLPI,SERPINA5
GO: Molecular Function	GO:0016836	hydro-lyase activity			0.003202	1	0.03491	0.2635	9	186	CA10,PPARGC1A,KHK,ALDOB,CA2,CA12,SLC4A1,EHHADH,OGDHL
GO: Molecular Function	GO:0072349	modified amino acid transmembrane transporter activity			0.003281	1	0.03491	0.2635	3	19	SLC3A1,SLC7A9,SLC22A5
GO: Molecular Function	GO:0004653	polypeptide N-acetylgalactosaminyltransferase activity			0.003281	1	0.03491	0.2635	3	19	GALNT3,GALNT14,GALNT11
GO: Molecular Function	GO:0015106	bicarbonate transmembrane transporter activity			0.003281	1	0.03491	0.2635	3	19	SLC26A4,SLC4A1,SLC4A4
GO: Molecular Function	GO:0031420	alkali metal ion binding			0.003281	1	0.03491	0.2635	3	19	KCNJ1,ATP1A1,ATP1B1
GO: Molecular Function	GO:0015296	anion:cation symporter activity			0.003281	1	0.03491	0.2635	3	19	SLC12A1,SLC12A3,SLC13A1
GO: Molecular Function	GO:0015108	chloride transmembrane transporter activity			0.003413	1	0.03572	0.2696	7	121	SLC26A4,CLIC5,CLCNKB,SLC4A1,SLC12A1,SLC12A3,GABRA2
GO: Molecular Function	GO:0061134	peptidase regulator activity			0.00356	1	0.03572	0.2696	10	225	MAL,CRIM1,SPINK1,SERPINI1,KNG1,COL4A3,SERPINA6,TFAP2B,SLPI,SERPINA5
GO: Molecular Function	GO:0030145	manganese ion binding			0.003632	1	0.03572	0.2696	5	64	GALNT3,MPPED2,ARG2,PCK1,PCK2
GO: Molecular Function	GO:0015168	glycerol transmembrane transporter activity			0.003692	1	0.03572	0.2696	2	6	AQP1,AQP3
GO: Molecular Function	GO:0015142	tricarboxylic acid transmembrane transporter activity			0.003692	1	0.03572	0.2696	2	6	SLC13A3,SLC13A1
GO: Molecular Function	GO:0015137	citrate transmembrane transporter activity			0.003692	1	0.03572	0.2696	2	6	SLC13A3,SLC13A1
GO: Molecular Function	GO:0008422	beta-glucosidase activity			0.003692	1	0.03572	0.2696	2	6	KL,GBA3
GO: Molecular Function	GO:0003997	acyl-CoA oxidase activity			0.003692	1	0.03572	0.2696	2	6	ACADL,ACOX2
GO: Molecular Function	GO:0015220	choline transmembrane transporter activity			0.003692	1	0.03572	0.2696	2	6	SLC44A4,SLC22A2
GO: Molecular Function	GO:0140327	flippase activity			0.003692	1	0.03572	0.2696	2	6	TMEM30B,ABCB1
GO: Molecular Function	GO:0009055	electron transfer activity			0.003737	1	0.03582	0.2704	7	123	MAOB,ACADSB,GLDC,AOX1,NOX4,AKR7A3,CYB5A
GO: Molecular Function	GO:0017147	Wnt-protein binding			0.003777	1	0.03588	0.2708	4	40	TSPAN12,MET,PTPRO,EGF
GO: Molecular Function	GO:0034185	apolipoprotein binding			0.003815	1	0.03592	0.2711	3	20	PLG,LIPC,MTTP
GO: Molecular Function	GO:0004867	serine-type endopeptidase inhibitor activity			0.004073	1	0.03802	0.2869	6	94	CRIM1,SPINK1,SERPINI1,SERPINA6,SLPI,SERPINA5
GO: Molecular Function	GO:0051287	NAD binding			0.004425	1	0.04094	0.309	5	67	HPGD,HSD11B2,AOX1,CRYL1,CRYZ
GO: Molecular Function	GO:0004714	transmembrane receptor protein tyrosine kinase activity			0.004751	1	0.04358	0.3289	6	97	ERBB3,ERBB4,CRIM1,MET,FGFR3,EGF
GO: Molecular Function	GO:0000099	sulfur amino acid transmembrane transporter activity			0.005115	1	0.04498	0.3395	2	7	SLC3A1,SLC7A9
GO: Molecular Function	GO:0015141	succinate transmembrane transporter activity			0.005115	1	0.04498	0.3395	2	7	SLC13A3,SLC13A1
GO: Molecular Function	GO:0047035	testosterone dehydrogenase (NAD+) activity			0.005115	1	0.04498	0.3395	2	7	HSD17B2,AKR1C3
GO: Molecular Function	GO:0015204	urea transmembrane transporter activity			0.005115	1	0.04498	0.3395	2	7	AQP3,SLC14A1
GO: Molecular Function	GO:0038132	neuregulin binding			0.005115	1	0.04498	0.3395	2	7	ERBB3,ERBB4
GO: Biological Process	GO:0006082	organic acid metabolic process			1.341e-23	7.04e-20	7.04e-20	6.437e-19	72	1238	EPHX2,RIDA,GLYAT,HGD,GAD1,UPB1,DDAH1,ACADL,SLC17A3,ACADSB,ACAT1,CYP3A5,ALDH8A1,GATM,PIPOX,DAO,ALDH1L1,DDC,ACOX2,FABP1,BHMT,ADH6,TYRP1,PPARGC1A,PRODH2,PHYH,ACSM3,SULT1C2,HPD,GLDC,HPGD,BHMT2,ANGPTL3,KHK,UGT2B28,ALDOB,ALDH6A1,NR1H4,GOT1,SLC27A2,DPYS,FMO1,HYAL1,NOX4,ACSF2,SLC3A1,SLC4A1,ARG2,MSRA,CRYL1,RGN,LIPC,EGF,SLC17A1,SLC34A1,EHHADH,OSBPL3,UGT2A3,ASPA,ASS1,AKR1C3,AGMAT,FOLH1B,OGDHL,CYP4F3,PCCA,G6…
GO: Biological Process	GO:0019752	carboxylic acid metabolic process			1.965e-22	1.032e-18	5.16e-19	4.718e-18	67	1127	EPHX2,RIDA,GLYAT,HGD,GAD1,UPB1,DDAH1,ACADL,ACADSB,ACAT1,CYP3A5,ALDH8A1,GATM,PIPOX,DAO,ALDH1L1,DDC,ACOX2,FABP1,BHMT,ADH6,TYRP1,PPARGC1A,PRODH2,PHYH,ACSM3,HPD,GLDC,HPGD,BHMT2,ANGPTL3,KHK,UGT2B28,ALDOB,ALDH6A1,NR1H4,GOT1,SLC27A2,DPYS,HYAL1,NOX4,ACSF2,SLC3A1,SLC4A1,ARG2,MSRA,CRYL1,RGN,LIPC,EGF,SLC34A1,EHHADH,OSBPL3,UGT2A3,ASPA,ASS1,AKR1C3,AGMAT,FOLH1B,OGDHL,CYP4F3,PCCA,HAO2,DCXR,PCK1,PCK2,CYB5A
GO: Biological Process	GO:0043436	oxoacid metabolic process			3.023e-21	1.587e-17	5.292e-18	4.838e-17	68	1219	EPHX2,RIDA,GLYAT,HGD,GAD1,UPB1,DDAH1,ACADL,ACADSB,ACAT1,CYP3A5,ALDH8A1,GATM,PIPOX,DAO,ALDH1L1,DDC,ACOX2,FABP1,BHMT,ADH6,TYRP1,PPARGC1A,PRODH2,PHYH,ACSM3,SULT1C2,HPD,GLDC,HPGD,BHMT2,ANGPTL3,KHK,UGT2B28,ALDOB,ALDH6A1,NR1H4,GOT1,SLC27A2,DPYS,HYAL1,NOX4,ACSF2,SLC3A1,SLC4A1,ARG2,MSRA,CRYL1,RGN,LIPC,EGF,SLC34A1,EHHADH,OSBPL3,UGT2A3,ASPA,ASS1,AKR1C3,AGMAT,FOLH1B,OGDHL,CYP4F3,PCCA,HAO2,DCXR,PCK1,PCK2,CYB…
GO: Biological Process	GO:0072001	renal system development			1.729e-19	9.079e-16	2.27e-16	2.075e-15	35	333	SOX9,RIDA,ACAT1,GATA3,MECOM,MAGI2,NPHS2,PTPRO,KCNJ1,HPGD,FGF1,UMOD,MME,SDC4,CA2,NPHS1,COL4A3,COL4A4,HNF1B,CALB1,PODXL,RBP4,REN,AQP1,TFAP2A,TFAP2B,ARG2,LHX1,RGN,SLC12A1,SLC34A1,ASS1,EMX2,TACSTD2,ENPEP
GO: Biological Process	GO:0016054	organic acid catabolic process			5.6e-18	2.941e-14	4.901e-15	4.481e-14	31	281	RIDA,HGD,GAD1,DDAH1,ACADL,ACADSB,ACAT1,ALDH8A1,PIPOX,DAO,ALDH1L1,ACOX2,FABP1,PRODH2,PHYH,HPD,GLDC,ALDH6A1,GOT1,SLC27A2,HYAL1,ARG2,CRYL1,EHHADH,ASPA,CYP4F3,PCCA,HAO2,DCXR,PCK1,PCK2
GO: Biological Process	GO:0046395	carboxylic acid catabolic process			5.6e-18	2.941e-14	4.901e-15	4.481e-14	31	281	RIDA,HGD,GAD1,DDAH1,ACADL,ACADSB,ACAT1,ALDH8A1,PIPOX,DAO,ALDH1L1,ACOX2,FABP1,PRODH2,PHYH,HPD,GLDC,ALDH6A1,GOT1,SLC27A2,HYAL1,ARG2,CRYL1,EHHADH,ASPA,CYP4F3,PCCA,HAO2,DCXR,PCK1,PCK2
GO: Biological Process	GO:0001655	urogenital system development			1.188e-17	6.24e-14	8.915e-15	8.151e-14	35	380	SOX9,RIDA,ACAT1,GATA3,MECOM,MAGI2,NPHS2,PTPRO,KCNJ1,HPGD,FGF1,UMOD,MME,SDC4,CA2,NPHS1,COL4A3,COL4A4,HNF1B,CALB1,PODXL,RBP4,REN,AQP1,TFAP2A,TFAP2B,ARG2,LHX1,RGN,SLC12A1,SLC34A1,ASS1,EMX2,TACSTD2,ENPEP
GO: Biological Process	GO:0001822	kidney development			1.674e-17	8.792e-14	1.099e-14	1.005e-13	32	314	SOX9,RIDA,ACAT1,GATA3,MAGI2,NPHS2,PTPRO,KCNJ1,HPGD,FGF1,UMOD,MME,SDC4,CA2,NPHS1,COL4A3,COL4A4,HNF1B,CALB1,PODXL,REN,AQP1,TFAP2A,TFAP2B,ARG2,LHX1,RGN,SLC12A1,SLC34A1,ASS1,TACSTD2,ENPEP
GO: Biological Process	GO:0044282	small molecule catabolic process			2.005e-17	1.053e-13	1.17e-14	1.07e-13	38	462	RIDA,HGD,GAD1,UPB1,DDAH1,IMPA2,ACADL,ACADSB,ACAT1,ALDH8A1,PIPOX,DAO,ALDH1L1,ACOX2,FABP1,PRODH2,PHYH,HPD,GLDC,KHK,ALDOB,ALDH6A1,GOT1,SLC27A2,DPYS,HYAL1,CUBN,ARG2,CRYL1,EHHADH,ASPA,AKR1C3,CYP4F3,PCCA,HAO2,DCXR,PCK1,PCK2
GO: Biological Process	GO:0055114	oxidation-reduction process			8.625e-15	4.529e-11	4.529e-12	4.141e-11	58	1231	HGD,DDAH1,AOC1,MAOA,ACADL,MAOB,ACADSB,ACAT1,CYP3A5,ALDH8A1,PIPOX,DAO,ALDH1L1,ACOX2,FABP1,ADH6,TYRP1,PPARGC1A,PRODH2,PHYH,KL,HPD,GLDC,HPGD,DIO1,KHK,HSD11B2,HSD17B2,ALDOB,BBOX1,ALDH6A1,SLC27A2,NPR3,FMO1,FMO4,FMO5,SELENBP1,AOX1,GPX3,NOX4,SLC4A1,PPP1R1A,ARG2,MSRA,CRYL1,RGN,CRYZ,EHHADH,P3H2,AKR7A3,AKR1C3,OGDHL,CYP4F3,G6PC,HAO2,DCXR,PCK2,CYB5A
GO: Biological Process	GO:0017144	drug metabolic process			2.122e-14	1.114e-10	9.524e-12	8.708e-11	44	760	EPHX2,RIDA,GLYAT,HGD,DDAH1,MAOA,MAOB,ACAT1,CYP3A5,ACP3,ALDH8A1,GATM,PIPOX,DAO,HMGCS2,ALDH1L1,DDC,BHMT,ADH6,TYRP1,PPARGC1A,CLU,HPD,GLDC,BHMT2,AK4,DPYS,NPR1,FMO1,FMO4,AOX1,GPX3,CUBN,SLC44A4,ARG2,RGN,SLC34A1,ASPA,ASS1,AKR1C3,PCCA,HAO2,PCK1,PCK2
GO: Biological Process	GO:0032787	monocarboxylic acid metabolic process			2.176e-14	1.143e-10	9.524e-12	8.708e-11	42	696	EPHX2,GLYAT,GAD1,ACADL,ACADSB,ACAT1,CYP3A5,ALDH8A1,GATM,ACOX2,FABP1,ADH6,TYRP1,PPARGC1A,PRODH2,PHYH,ACSM3,HPGD,ANGPTL3,KHK,UGT2B28,ALDOB,NR1H4,SLC27A2,ACSF2,SLC4A1,CRYL1,RGN,LIPC,EHHADH,OSBPL3,UGT2A3,ASPA,AKR1C3,OGDHL,CYP4F3,PCCA,HAO2,DCXR,PCK1,PCK2,CYB5A
GO: Biological Process	GO:1901605	alpha-amino acid metabolic process			6.242e-14	3.278e-10	2.393e-11	2.188e-10	24	223	RIDA,GLYAT,HGD,GAD1,DDAH1,ACAT1,ALDH8A1,PIPOX,DAO,BHMT,TYRP1,PRODH2,HPD,GLDC,BHMT2,ALDH6A1,NR1H4,GOT1,NOX4,ARG2,MSRA,ASPA,ASS1,AGMAT
GO: Biological Process	GO:0006520	cellular amino acid metabolic process			6.381e-14	3.351e-10	2.393e-11	2.188e-10	30	366	RIDA,GLYAT,HGD,GAD1,UPB1,DDAH1,ACADSB,ACAT1,ALDH8A1,PIPOX,DAO,DDC,BHMT,TYRP1,PRODH2,HPD,GLDC,BHMT2,ALDH6A1,NR1H4,GOT1,DPYS,NOX4,SLC3A1,ARG2,MSRA,ASPA,ASS1,AGMAT,FOLH1B
GO: Biological Process	GO:0072006	nephron development			6.17e-13	3.24e-09	2.16e-10	1.975e-09	20	162	SOX9,ACAT1,GATA3,MAGI2,NPHS2,PTPRO,FGF1,UMOD,NPHS1,COL4A3,COL4A4,HNF1B,CALB1,PODXL,AQP1,TFAP2A,TFAP2B,LHX1,TACSTD2,ENPEP
GO: Biological Process	GO:0048878	chemical homeostasis			9.172e-13	4.816e-09	3.01e-10	2.752e-09	57	1334	EPHX2,ERBB4,SLC26A4,PTGER3,F2RL1,PTH1R,ACOX2,APOM,MET,PPARGC1A,KL,ACSM3,HPN,ANGPTL3,UMOD,NR3C2,CX3CL1,KNG1,NR1H4,GOT1,CA2,RHCG,CA12,NPR1,NPY1R,CALB1,ANK2,ANK3,ANPEP,RBP4,NOX4,CUBN,AQP1,AQP3,TFAP2B,SLC4A1,MT1E,MT1F,MT1G,MT1H,RGN,MT1X,LIPC,SLC12A1,SLC12A3,SLC34A1,PDE8B,ATP6V0A4,MTTP,LRP2,ATP1A1,SLC4A4,ATP1B1,CDH1,G6PC,PCK1,PCK2
GO: Biological Process	GO:0006629	lipid metabolic process			1.478e-12	7.76e-09	4.565e-10	4.174e-09	60	1471	EPHX2,CDS1,IMPA2,ACADL,ACADSB,ACAT1,CYP3A5,ALDH8A1,HMGCS2,PLPPR1,ACOX2,FABP1,SH3YL1,APOM,ADH6,TYRP1,PPARGC1A,PHYH,TFCP2L1,ACSM3,CLU,HPGD,GPC4,ANGPTL3,FGF1,PIP5K1B,VAV3,FGFR3,PLCL1,UGT2B28,HSD11B2,HSD17B2,SDC4,NR1H4,SLC27A2,CWH43,RBP4,ACSF2,CUBN,MAP7,SLC44A4,SERPINA6,GBA3,CRYL1,RGN,LIPC,EHHADH,PDE8B,OSBPL3,MTTP,AKR1C3,LRP2,CYP4F3,ATP1A1,PCCA,G6PC,HAO2,PCK1,PCK2,CYB5A
GO: Biological Process	GO:0006820	anion transport			3.604e-12	1.892e-08	1.051e-09	9.613e-09	39	709	TMEM30B,SLC17A3,SLC26A4,PDZK1,PTGER3,FABP1,ABCB1,SLC22A6,CLIC5,CLCNKB,SLC5A12,NR1H4,CA2,SLC27A2,CA12,RBP4,SLC13A3,SLC44A4,AQP1,SLC2A2,SLC3A1,SLC4A1,ARG2,SLC7A9,ACE2,SLC6A13,SLC10A2,SLC12A1,SLC12A3,SLCO4C1,SLC13A1,SLC16A4,SLC17A1,SLC34A1,MTTP,LRP2,SLC4A4,G6PC,GABRA2
GO: Biological Process	GO:1901615	organic hydroxy compound metabolic process			4.905e-12	2.576e-08	1.356e-09	1.24e-08	35	585	EPHX2,IMPA2,MAOA,ACADL,MAOB,GATA3,DAO,HMGCS2,DDC,PTH1R,ACOX2,ADH6,TYRP1,KL,HPN,ANGPTL3,DIO1,FGF1,PLCL1,NR1H4,GOT1,SLC27A2,NPR1,RBP4,CUBN,LIPC,SLC34A1,OSBPL3,MTTP,AKR1C3,LRP2,CYP4F3,HAO2,PCK1,PCK2
GO: Biological Process	GO:0072073	kidney epithelium development			3.195e-11	1.678e-07	8.389e-09	7.67e-08	18	157	SOX9,ACAT1,GATA3,MAGI2,NPHS2,PTPRO,FGF1,UMOD,SDC4,NPHS1,HNF1B,CALB1,PODXL,AQP1,TFAP2B,ARG2,LHX1,TACSTD2
GO: Biological Process	GO:0006811	ion transport			5.24e-11	2.751e-07	1.251e-08	1.144e-07	68	1956	PCP4,TMEM30B,MAOB,SLC17A3,SPINK1,SLC26A4,PDZK1,PTGER3,FABP1,ABCB1,PPARGC1A,SLC22A6,CLIC5,CLCNKB,TRPM3,KCNJ1,HPN,KCNJ15,KCNJ16,AK4,SLC5A12,CX3CL1,NR1H4,CA2,SLC27A2,RHCG,CA12,ANK2,ANK3,ANXA3,RBP4,SLC13A3,CUBN,SLC44A4,AQP1,CLDN10,SLC2A2,SLC3A1,SLC4A1,ARG2,SLC7A9,ACE2,SLC6A13,RGN,PLLP,SLC10A2,SHANK2,SLC12A1,EGF,SLC12A3,SLCO4C1,SLC13A1,SLC16A4,SLC15A2,SLC17A1,SLC34A1,SLC22A2,SLC22A5,ATP6V0A4,MTTP,LRP2…
GO: Biological Process	GO:0072009	nephron epithelium development	1		5.242e-11	2.753e-07	1.251e-08	1.144e-07	16	122	SOX9,ACAT1,GATA3,MAGI2,NPHS2,PTPRO,FGF1,UMOD,NPHS1,HNF1B,CALB1,PODXL,AQP1,TFAP2B,LHX1,TACSTD2
GO: Biological Process	GO:0044255	cellular lipid metabolic process			6.331e-11	3.325e-07	1.446e-08	1.322e-07	48	1117	EPHX2,CDS1,IMPA2,ACADL,ACADSB,ACAT1,CYP3A5,ALDH8A1,HMGCS2,PLPPR1,ACOX2,FABP1,SH3YL1,APOM,ADH6,TYRP1,PPARGC1A,PHYH,ACSM3,HPGD,GPC4,ANGPTL3,PIP5K1B,VAV3,FGFR3,SDC4,NR1H4,SLC27A2,CWH43,RBP4,ACSF2,MAP7,SLC44A4,GBA3,CRYL1,RGN,LIPC,EHHADH,MTTP,AKR1C3,LRP2,CYP4F3,PCCA,G6PC,HAO2,PCK1,PCK2,CYB5A
GO: Biological Process	GO:1901606	alpha-amino acid catabolic process			7.015e-11	3.684e-07	1.535e-08	1.403e-07	15	106	RIDA,HGD,GAD1,DDAH1,ACAT1,ALDH8A1,PIPOX,DAO,PRODH2,HPD,GLDC,ALDH6A1,GOT1,ARG2,ASPA
GO: Biological Process	GO:0009063	cellular amino acid catabolic process			7.616e-11	3.999e-07	1.541e-08	1.409e-07	16	125	RIDA,HGD,GAD1,DDAH1,ACADSB,ACAT1,ALDH8A1,PIPOX,DAO,PRODH2,HPD,GLDC,ALDH6A1,GOT1,ARG2,ASPA
GO: Biological Process	GO:0015711	organic anion transport			7.631e-11	4.007e-07	1.541e-08	1.409e-07	32	547	TMEM30B,SLC17A3,SLC26A4,PTGER3,FABP1,ABCB1,SLC22A6,SLC5A12,NR1H4,CA2,SLC27A2,CA12,RBP4,SLC13A3,SLC44A4,AQP1,SLC2A2,SLC3A1,SLC4A1,ARG2,SLC7A9,ACE2,SLC6A13,SLC10A2,SLCO4C1,SLC13A1,SLC16A4,SLC17A1,MTTP,LRP2,SLC4A4,G6PC
GO: Biological Process	GO:0042133	neurotransmitter metabolic process			1.964e-10	1.031e-06	3.819e-08	3.492e-07	18	175	RIDA,GLYAT,GAD1,UPB1,DDAH1,MAOA,MAOB,DDC,BHMT,CLU,GLDC,ALDH6A1,DPYS,SLC44A4,ARG2,RGN,SLC22A2,ASS1
GO: Biological Process	GO:0098656	anion transmembrane transport			3.738e-10	1.963e-06	7.01e-08	6.409e-07	27	423	SLC17A3,SLC26A4,ABCB1,SLC22A6,CLIC5,CLCNKB,SLC5A12,SLC27A2,RBP4,SLC13A3,SLC44A4,SLC2A2,SLC3A1,SLC4A1,SLC7A9,SLC6A13,SLC10A2,SLC12A1,SLC12A3,SLCO4C1,SLC13A1,SLC16A4,SLC17A1,SLC34A1,LRP2,SLC4A4,GABRA2
GO: Biological Process	GO:0008202	steroid metabolic process			4.244e-10	2.228e-06	7.684e-08	7.026e-07	25	366	EPHX2,ACADL,ACAT1,CYP3A5,HMGCS2,ACOX2,PPARGC1A,TFCP2L1,ANGPTL3,FGF1,UGT2B28,HSD11B2,HSD17B2,NR1H4,SLC27A2,CUBN,SERPINA6,LIPC,PDE8B,OSBPL3,MTTP,AKR1C3,LRP2,ATP1A1,G6PC
GO: Biological Process	GO:0044283	small molecule biosynthetic process			4.821e-10	2.532e-06	8.438e-08	7.716e-07	37	763	EPHX2,GAD1,PDE1A,UPB1,IMPA2,ACADL,ACAT1,ALDH8A1,GATM,HMGCS2,PTH1R,ACOX2,BHMT,PPARGC1A,ACSM3,HPGD,BHMT2,FGF1,PLCL1,ALDOB,NR1H4,GOT1,SLC27A2,HYAL1,RBP4,RGN,LIPC,EGF,PDE8B,OSBPL3,ASPA,ASS1,AKR1C3,FOLH1B,G6PC,PCK1,PCK2
GO: Biological Process	GO:0060429	epithelium development			5.393e-10	2.832e-06	9.135e-08	8.353e-07	55	1483	SOX9,ERBB4,ARHGAP24,ACAT1,GATA3,PERP,MECOM,IRF6,F2RL1,ABCB1,MAGI2,MET,TFCP2L1,NPHS2,CLIC5,PTPRO,HPN,GPC4,FGF1,UMOD,COBL,FGFR3,SDC4,CA2,TBX2,RHCG,NPHS1,COL4A4,KRT7,HNF1B,KRT8,RAB25,CALB1,DSC1,PODXL,SOSTDC1,REN,MAP7,SLC44A4,AQP1,AQP3,TFAP2A,TFAP2B,PPL,ARG2,LHX1,EGF,AKR1C3,LRP2,ELF3,MST1L,TACSTD2,CDH1,PCK1,PCK2
GO: Biological Process	GO:0042737	drug catabolic process			9.757e-10	5.123e-06	1.601e-07	1.464e-06	16	148	RIDA,HGD,MAOA,MAOB,ACAT1,CYP3A5,PIPOX,DAO,HPD,GLDC,DPYS,FMO4,GPX3,CUBN,PCK1,PCK2
GO: Biological Process	GO:0035295	tube development	1		1.78e-09	9.345e-06	2.832e-07	2.589e-06	49	1276	TSPAN12,SOX9,RIDA,ARHGAP24,DDAH1,ACAT1,GATA3,ADGRG1,MECOM,CCN6,MET,HPGD,ANGPTL3,FGF1,UMOD,COBL,FGF9,VAV3,FGFR3,MME,PLG,CX3CL1,SDC4,TBX2,COL4A3,COL4A4,HNF1B,NPR1,CALB1,THSD7A,ANPEP,PODXL,HYAL1,ANXA3,RBP4,SOSTDC1,AQP1,TFAP2A,TFAP2B,ARG2,LHX1,EFNA1,EGF,ASS1,LRP2,EMX2,TACSTD2,CDH1,ENPEP
GO: Biological Process	GO:0006631	fatty acid metabolic process			3.238e-09	1.7e-05	5.001e-07	4.572e-06	25	404	EPHX2,ACADL,ACADSB,ACAT1,ACOX2,FABP1,TYRP1,PPARGC1A,PHYH,ACSM3,HPGD,ANGPTL3,SLC27A2,ACSF2,CRYL1,RGN,LIPC,EHHADH,AKR1C3,CYP4F3,PCCA,HAO2,PCK1,PCK2,CYB5A
GO: Biological Process	GO:0003014	renal system process			3.723e-09	1.955e-05	5.585e-07	5.107e-06	15	140	PTGER3,F2RL1,SLC22A6,PTPRO,KCNJ1,HSD11B2,NPR1,NPR3,ANPEP,REN,AQP1,AQP3,TFAP2B,SLC4A1,AKR1C3
GO: Biological Process	GO:0050801	ion homeostasis			5.051e-09	2.652e-05	7.368e-07	6.737e-06	39	909	EPHX2,SLC26A4,PTGER3,F2RL1,PTH1R,KL,ANGPTL3,UMOD,NR3C2,CX3CL1,KNG1,NR1H4,GOT1,CA2,RHCG,CA12,NPR1,NPY1R,CALB1,ANK2,ANK3,ANPEP,CUBN,TFAP2B,SLC4A1,MT1E,MT1F,MT1G,MT1H,RGN,MT1X,SLC12A1,SLC12A3,SLC34A1,ATP6V0A4,LRP2,ATP1A1,SLC4A4,ATP1B1
GO: Biological Process	GO:0034220	ion transmembrane transport	1		8.467e-09	4.446e-05	1.186e-06	1.084e-05	52	1469	SLC17A3,SLC26A4,PDZK1,PTGER3,ABCB1,PPARGC1A,SLC22A6,CLIC5,CLCNKB,TRPM3,KCNJ1,HPN,KCNJ15,KCNJ16,AK4,SLC5A12,CX3CL1,SLC27A2,RHCG,ANK2,ANK3,ANXA3,RBP4,SLC13A3,SLC44A4,AQP1,SLC2A2,SLC3A1,SLC4A1,SLC7A9,SLC6A13,RGN,SLC10A2,SHANK2,SLC12A1,SLC12A3,SLCO4C1,SLC13A1,SLC16A4,SLC15A2,SLC17A1,SLC34A1,SLC22A2,SLC22A5,ATP6V0A4,LRP2,ATP1A1,SLC4A4,ATP1B1,FXYD2,CYB5A,GABRA2
GO: Biological Process	GO:0055085	transmembrane transport			8.582e-09	4.506e-05	1.186e-06	1.084e-05	60	1830	ERBB3,ERBB4,SLC17A3,AZGP1,SLC26A4,PDZK1,PTGER3,ABCB1,MET,PPARGC1A,SLC22A6,CLIC5,CLCNKB,TRPM3,CLU,KCNJ1,HPN,KCNJ15,KCNJ16,AK4,SLC5A12,CX3CL1,CA2,SLC27A2,RHCG,ANK2,ANK3,ANXA3,RBP4,SLC13A3,SLC44A4,AQP1,AQP3,SLC2A2,SLC3A1,SLC4A1,SLC7A9,SLC6A13,RGN,SLC10A2,SHANK2,SLC12A1,SLC12A3,SLCO4C1,SLC13A1,SLC16A4,SLC14A1,SLC15A2,SLC17A1,SLC34A1,SLC22A2,SLC22A5,ATP6V0A4,LRP2,ATP1A1,SLC4A4,ATP1B1,FXYD2,CYB5A,GABRA2
GO: Biological Process	GO:0046394	carboxylic acid biosynthetic process			1.433e-08	7.524e-05	1.929e-06	1.764e-05	23	372	EPHX2,GAD1,UPB1,ACADL,ALDH8A1,GATM,ACOX2,BHMT,ACSM3,HPGD,BHMT2,NR1H4,GOT1,SLC27A2,HYAL1,RGN,LIPC,EGF,OSBPL3,ASPA,ASS1,AKR1C3,FOLH1B
GO: Biological Process	GO:0016053	organic acid biosynthetic process			1.506e-08	7.909e-05	1.977e-06	1.808e-05	23	373	EPHX2,GAD1,UPB1,ACADL,ALDH8A1,GATM,ACOX2,BHMT,ACSM3,HPGD,BHMT2,NR1H4,GOT1,SLC27A2,HYAL1,RGN,LIPC,EGF,OSBPL3,ASPA,ASS1,AKR1C3,FOLH1B
GO: Biological Process	GO:0010038	response to metal ion			1.715e-08	9.004e-05	2.196e-06	2.008e-05	24	407	AOC1,MAOB,GATM,PPARGC1A,KCNJ1,FGB,KHK,ALDOB,GOT1,CA2,ANK3,AQP1,AQP3,TFAP2A,MT1E,MT1F,MT1G,MT1H,MT1X,SLC34A1,ASS1,AKR1C3,CDH1,CYB5A
GO: Biological Process	GO:0098771	inorganic ion homeostasis			2.013e-08	0.0001057	2.516e-06	2.301e-05	36	838	EPHX2,SLC26A4,PTGER3,F2RL1,PTH1R,KL,NR3C2,CX3CL1,KNG1,GOT1,CA2,RHCG,CA12,NPR1,NPY1R,CALB1,ANK2,ANK3,ANPEP,CUBN,TFAP2B,SLC4A1,MT1E,MT1F,MT1G,MT1H,RGN,MT1X,SLC12A1,SLC12A3,SLC34A1,ATP6V0A4,LRP2,ATP1A1,SLC4A4,ATP1B1
GO: Biological Process	GO:0072329	monocarboxylic acid catabolic process			2.29e-08	0.0001202	2.796e-06	2.557e-05	14	137	ACADL,ACAT1,ACOX2,FABP1,PHYH,SLC27A2,CRYL1,EHHADH,CYP4F3,PCCA,HAO2,DCXR,PCK1,PCK2
GO: Biological Process	GO:0042445	hormone metabolic process			2.448e-08	0.0001286	2.89e-06	2.643e-05	19	264	CYP3A5,ALDH8A1,GATA3,ADH6,PPARGC1A,HPN,DIO1,MME,HSD11B2,HSD17B2,RBP4,REN,SLC44A4,SERPINA6,ACE2,PDE8B,AKR1C3,ATP1A1,ENPEP
GO: Biological Process	GO:0035239	tube morphogenesis			2.477e-08	0.0001301	2.89e-06	2.643e-05	41	1045	TSPAN12,SOX9,ARHGAP24,DDAH1,GATA3,ADGRG1,MECOM,CCN6,MET,HPGD,ANGPTL3,FGF1,COBL,FGF9,VAV3,FGFR3,PLG,CX3CL1,SDC4,TBX2,COL4A3,COL4A4,HNF1B,NPR1,THSD7A,ANPEP,PODXL,HYAL1,ANXA3,SOSTDC1,AQP1,TFAP2A,TFAP2B,LHX1,EFNA1,EGF,LRP2,EMX2,TACSTD2,CDH1,ENPEP
GO: Biological Process	GO:0009636	response to toxic substance			2.661e-08	0.0001397	3.037e-06	2.777e-05	29	586	EPHX2,GLYAT,MAOB,SLC17A3,PDZK1,GATA3,DDC,FABP1,APOM,ADH6,MET,PPARGC1A,HPGD,ADIRF,GPX3,RBP4,AQP1,SLC4A1,CRYAB,MT1E,MT1F,MT1G,MT1H,RGN,MT1X,SLC15A2,ASS1,AKR7A3,CDH1
GO: Biological Process	GO:0007588	excretion			3.424e-08	0.0001798	3.825e-06	3.497e-05	11	80	PTGER3,NPHS2,CLCNKB,KCNJ1,UMOD,NR3C2,NPHS1,NPR1,ANPEP,SLC12A1,ATP6V0A4
GO: Biological Process	GO:0055080	cation homeostasis			4.386e-08	0.0002303	4.798e-06	4.387e-05	35	825	EPHX2,SLC26A4,PTGER3,F2RL1,PTH1R,KL,NR3C2,CX3CL1,KNG1,GOT1,CA2,RHCG,CA12,NPR1,NPY1R,CALB1,ANK2,ANK3,ANPEP,CUBN,TFAP2B,SLC4A1,MT1E,MT1F,MT1G,MT1H,RGN,MT1X,SLC12A1,SLC12A3,ATP6V0A4,LRP2,ATP1A1,SLC4A4,ATP1B1
GO: Biological Process	GO:0042493	response to drug			4.484e-08	0.0002354	4.805e-06	4.394e-05	44	1194	PCP4,SOX9,GAD1,AOC1,MAOB,GATA3,PTGER3,DDC,FABP1,ABCB1,ADH6,MET,PPARGC1A,SLC22A6,HPGD,AK4,VAV3,HSD11B2,ADIRF,CA2,CA12,HNF1B,SORBS2,RBP4,SLC13A3,REN,CUBN,SLC44A4,AQP1,TFAP2B,SLC4A1,ARG2,CRYAB,SLC13A1,SLC34A1,SLC22A2,SLC22A5,ASS1,LRP2,ATP1A1,EMX2,CDH1,PCK1,PCK2
GO: Biological Process	GO:0010035	response to inorganic substance			4.711e-08	0.0002474	4.947e-06	4.523e-05	30	638	AOC1,MAOB,GATM,FABP1,MET,PPARGC1A,KCNJ1,FGB,KHK,ALDOB,GOT1,CA2,KRT8,ANK3,AQP1,AQP3,TFAP2A,SLC4A1,CRYAB,MT1E,MT1F,MT1G,MT1H,RGN,MT1X,SLC34A1,ASS1,AKR1C3,CDH1,CYB5A
GO: Biological Process	GO:0010817	regulation of hormone levels			6.78e-08	0.000356	6.981e-06	6.383e-05	29	612	CYP3A5,ALDH8A1,GATA3,PTGER3,ADH6,PPARGC1A,HPN,FGB,DIO1,MME,HSD11B2,HSD17B2,NR1H4,HNF1B,NPY1R,RBP4,REN,SLC44A4,SERPINA6,AQP1,TFAP2B,SLC2A2,ACE2,PDE8B,AKR1C3,LRP2,ATP1A1,ENPEP,PCK2
GO: Biological Process	GO:0055067	monovalent inorganic cation homeostasis			7.146e-08	0.0003752	7.216e-06	6.598e-05	15	174	SLC26A4,NR3C2,CA2,RHCG,CA12,NPR1,ANPEP,TFAP2B,SLC4A1,SLC12A1,SLC12A3,ATP6V0A4,ATP1A1,SLC4A4,ATP1B1
GO: Biological Process	GO:1901565	organonitrogen compound catabolic process			7.785e-08	0.0004088	7.713e-06	7.053e-05	47	1348	SOX9,RIDA,HGD,GAD1,PDE1A,UPB1,DDAH1,MAOA,ACADL,MAOB,ACADSB,ACAT1,CYP3A5,ALDH8A1,PIPOX,DAO,ALDH1L1,BHMT,NELL1,PRODH2,CLU,HPD,GLDC,GPC4,PLG,RNF128,ALDH6A1,SDC4,GOT1,TRHDE,DPYS,ANPEP,HYAL1,TOM1L1,AOX1,CUBN,ARG2,GBA3,RGN,EFNA1,LIPC,EGF,PDE8B,ASPA,LRP2,CDH1,ENPEP
GO: Biological Process	GO:0072197	ureter morphogenesis			9.376e-08	0.0004923	9.117e-06	8.336e-05	5	9	SOX9,GATA3,MECOM,LHX1,EMX2
GO: Biological Process	GO:0005975	carbohydrate metabolic process			1.09e-07	0.0005726	1.041e-05	9.519e-05	30	663	IMPA2,GALNT3,PTH1R,PPARGC1A,KL,ANGPTL3,KHK,UGT2B28,ALDOB,NR1H4,GOT1,NPY1R,HYAL1,RBP4,TFAP2B,SLC2A2,SLC3A1,SLC4A1,PPP1R1A,GBA3,CRYL1,RGN,EGF,UGT2A3,OGDHL,G6PC,DCXR,PCK1,PCK2,CYB5A
GO: Biological Process	GO:0032835	glomerulus development	1		1.148e-07	0.0006031	1.077e-05	9.847e-05	10	71	MAGI2,NPHS2,PTPRO,NPHS1,COL4A3,COL4A4,PODXL,AQP1,LHX1,ENPEP
GO: Biological Process	GO:0008217	regulation of blood pressure			1.459e-07	0.0007662	1.344e-05	0.0001229	16	210	EPHX2,DDAH1,F2RL1,KL,ACSM3,PTPRO,MME,HSD11B2,KLK1,NPR1,NPR3,NPY1R,REN,ACE2,ATP1A1,ENPEP
GO: Biological Process	GO:0009062	fatty acid catabolic process			1.529e-07	0.0008027	1.384e-05	0.0001265	12	113	ACADL,ACAT1,ACOX2,FABP1,PHYH,SLC27A2,EHHADH,CYP4F3,PCCA,HAO2,PCK1,PCK2
GO: Biological Process	GO:0030855	epithelial cell differentiation	1		2.086e-07	0.001095	1.856e-05	0.0001697	35	880	SOX9,ERBB4,GATA3,PERP,IRF6,F2RL1,ABCB1,MAGI2,MET,TFCP2L1,NPHS2,CLIC5,PTPRO,FGFR3,RHCG,NPHS1,COL4A4,KRT7,HNF1B,KRT8,RAB25,DSC1,PODXL,REN,MAP7,SLC44A4,AQP3,TFAP2A,PPL,LHX1,AKR1C3,ELF3,CDH1,PCK1,PCK2
GO: Biological Process	GO:0010043	response to zinc ion			2.468e-07	0.001296	2.16e-05	0.0001975	9	59	KHK,ALDOB,CA2,MT1E,MT1F,MT1G,MT1H,MT1X,ASS1
GO: Biological Process	GO:0071280	cellular response to copper ion			2.626e-07	0.001379	2.26e-05	0.0002067	7	30	AOC1,AQP1,MT1E,MT1F,MT1G,MT1H,MT1X
GO: Biological Process	GO:0098754	detoxification			2.905e-07	0.001526	2.461e-05	0.000225	13	143	SLC17A3,PDZK1,FABP1,APOM,GPX3,MT1E,MT1F,MT1G,MT1H,RGN,MT1X,SLC15A2,AKR7A3
GO: Biological Process	GO:0001656	metanephros development			3.189e-07	0.001675	2.658e-05	0.0002431	11	99	SOX9,ACAT1,GATA3,NPHS2,UMOD,HNF1B,CALB1,AQP1,TFAP2A,TFAP2B,LHX1
GO: Biological Process	GO:1901617	organic hydroxy compound biosynthetic process			3.297e-07	0.001731	2.705e-05	0.0002473	18	281	IMPA2,GATA3,DAO,HMGCS2,DDC,PTH1R,ACOX2,TYRP1,KL,FGF1,PLCL1,NR1H4,GOT1,SLC27A2,OSBPL3,AKR1C3,PCK1,PCK2
GO: Biological Process	GO:0008285	negative regulation of cell population proliferation			3.528e-07	0.001852	2.85e-05	0.0002606	34	859	SOX9,RIDA,ERBB4,DDAH1,AZGP1,GATA3,ADGRG1,IRF6,PBLD,PTH1R,CCN6,MAGI2,NELL1,PPARGC1A,HPN,UMOD,FGFR3,PLG,SDC4,COL4A3,NPR1,NPR3,RAP1GAP,RBP4,NOX4,TFAP2A,TFAP2B,ARG2,ACE2,FRK,RGN,CLMN,P3H2,CDH1
GO: Biological Process	GO:0002064	epithelial cell development			5.002e-07	0.002626	3.967e-05	0.0003627	17	259	SOX9,F2RL1,ABCB1,MAGI2,MET,TFCP2L1,NPHS2,CLIC5,FGFR3,NPHS1,COL4A4,RAB25,PODXL,REN,MAP7,TFAP2A,CDH1
GO: Biological Process	GO:0046686	response to cadmium ion			5.061e-07	0.002658	3.967e-05	0.0003627	9	64	GOT1,MT1E,MT1F,MT1G,MT1H,MT1X,SLC34A1,AKR1C3,CYB5A
GO: Biological Process	GO:0072080	nephron tubule development			5.276e-07	0.002771	4.053e-05	0.0003706	11	104	SOX9,ACAT1,GATA3,FGF1,UMOD,HNF1B,CALB1,AQP1,TFAP2B,LHX1,TACSTD2
GO: Biological Process	GO:0015698	inorganic anion transport			5.326e-07	0.002797	4.053e-05	0.0003706	15	203	SLC17A3,SLC26A4,ABCB1,SLC22A6,CLIC5,CLCNKB,CA2,SLC4A1,SLC12A1,SLC12A3,SLC13A1,SLC17A1,SLC34A1,SLC4A4,GABRA2
GO: Biological Process	GO:0044242	cellular lipid catabolic process			5.636e-07	0.002959	4.228e-05	0.0003866	16	232	ACADL,ACAT1,ACOX2,FABP1,PHYH,ANGPTL3,SLC27A2,GBA3,LIPC,EHHADH,AKR1C3,CYP4F3,PCCA,HAO2,PCK1,PCK2
GO: Biological Process	GO:1990573	potassium ion import across plasma membrane			6.784e-07	0.003562	5.017e-05	0.0004587	8	49	KCNJ1,KCNJ15,KCNJ16,SLC12A1,SLC12A3,ATP1A1,ATP1B1,FXYD2
GO: Biological Process	GO:0061326	renal tubule development			7.734e-07	0.004061	5.64e-05	0.0005157	11	108	SOX9,ACAT1,GATA3,FGF1,UMOD,HNF1B,CALB1,AQP1,TFAP2B,LHX1,TACSTD2
GO: Biological Process	GO:0006814	sodium ion transport	1		1.04e-06	0.005462	7.482e-05	0.0006841	17	273	SLC17A3,KCNJ1,SLC5A12,ANK3,SLC13A3,SLC6A13,SLC10A2,SLC12A1,SLC12A3,SLC13A1,SLC17A1,SLC34A1,SLC22A5,ATP1A1,SLC4A4,ATP1B1,FXYD2
GO: Biological Process	GO:0009066	aspartate family amino acid metabolic process			1.088e-06	0.005714	7.721e-05	0.000706	8	52	RIDA,PIPOX,BHMT,BHMT2,GOT1,MSRA,ASPA,ASS1
GO: Biological Process	GO:0003013	circulatory system process			1.153e-06	0.006054	8.072e-05	0.000738	27	624	EPHX2,DDAH1,PTGER3,F2RL1,MET,KL,ACSM3,PTPRO,FGB,MME,HSD11B2,CX3CL1,KLK1,KNG1,TBX2,COL4A3,NPR1,NPR3,NPY1R,ANK2,NOX4,REN,ACE2,ATP1A1,ATP1B1,FXYD2,ENPEP
GO: Biological Process	GO:0048732	gland development			1.381e-06	0.00725	9.54e-05	0.0008722	24	517	SOX9,ERBB4,UPB1,ACAT1,GATA3,IRF6,MET,TFCP2L1,HPN,COBL,AK4,TBX2,HNF1B,RAP1GAP,SOSTDC1,RGN,EGF,ASS1,ELF3,MST1L,CDH1,SERPINA5,PCK1,PCK2
GO: Biological Process	GO:0042127	regulation of cell population proliferation			1.415e-06	0.007428	9.646e-05	0.000882	56	1921	SOX9,RIDA,PDE1A,ERBB3,ERBB4,DDAH1,AZGP1,GATA3,ADGRG1,MECOM,IRF6,PBLD,PTH1R,CCN6,MAGI2,NELL1,PPARGC1A,CLU,HPGD,HPN,FGF1,UMOD,FGF9,NR3C2,VAV3,FGFR3,PLG,CX3CL1,SDC4,TBX2,COL4A3,NPR1,NPR3,RAP1GAP,RAB25,HYAL1,RBP4,NOX4,CLDN7,AQP1,TFAP2A,TFAP2B,SLC4A1,ARG2,LHX1,ACE2,FRK,RGN,EGF,CLMN,P3H2,AKR1C3,LRP2,MST1L,TACSTD2,CDH1
GO: Biological Process	GO:0019725	cellular homeostasis			1.518e-06	0.007973	0.0001022	0.0009346	38	1088	EPHX2,PTGER3,F2RL1,PTH1R,PPARGC1A,NR3C2,PLG,CX3CL1,KNG1,NR1H4,GOT1,CA2,RHCG,NPY1R,CALB1,ANK2,NOX4,CUBN,AQP1,TFAP2B,SLC4A1,MT1E,MT1F,MT1G,MT1H,RGN,MT1X,SLC12A1,SLC12A3,SLC34A1,PDE8B,ATP6V0A4,LRP2,ATP1A1,SLC4A4,ATP1B1,PCK1,PCK2
GO: Biological Process	GO:0006575	cellular modified amino acid metabolic process			1.558e-06	0.008184	0.0001036	0.0009472	15	221	ACADL,GATA3,GATM,PIPOX,ALDH1L1,BHMT,HPN,BHMT2,DIO1,BBOX1,GPX3,LIPC,SLC22A5,ASS1,FOLH1B
GO: Biological Process	GO:0072243	metanephric nephron epithelium development			1.623e-06	0.008521	0.0001065	0.0009739	6	25	SOX9,ACAT1,NPHS2,UMOD,CALB1,AQP1
GO: Biological Process	GO:0048646	anatomical structure formation involved in morphogenesis			1.793e-06	0.009414	0.0001162	0.001063	44	1365	TSPAN12,SOX9,ARHGAP24,DDAH1,GATA3,PERP,ADGRG1,CCN6,ANGPTL3,FGF1,COBL,FGF9,VAV3,PLG,CX3CL1,SDC4,TBX2,NPHS1,COL4A3,COL4A4,NAT8B,HNF1B,KRT8,NPR1,CALB1,THSD7A,ANK2,NEBL,ANPEP,PODXL,HYAL1,ANXA3,RBP4,SLC44A4,AQP1,TFAP2A,TFAP2B,LHX1,EFNA1,EGF,SLC34A1,LRP2,CDH1,ENPEP
GO: Biological Process	GO:1901700	response to oxygen-containing compound			1.822e-06	0.009569	0.0001167	0.001067	54	1839	SOX9,AOC1,MAOB,GATA3,GATM,PTGER3,FABP1,APOM,ADH6,MET,PPARGC1A,SLC22A6,KL,CLU,GLDC,HPGD,KHK,HSD11B2,HSD17B2,ALDOB,CX3CL1,NR1H4,GOT1,CA2,COL4A3,HNF1B,KRT8,FMO1,SORBS2,HYAL1,GPX3,RBP4,GRB14,NOX4,REN,MAP7,AQP1,AQP3,TFAP2A,SLC2A2,SLC4A1,CRYAB,RGN,SLC34A1,PDE8B,ATP6V0A4,ASS1,SLPI,AKR1C3,ATP1A1,CDH1,GRAMD1C,PCK1,PCK2
GO: Biological Process	GO:0055082	cellular chemical homeostasis			1.914e-06	0.01005	0.0001211	0.001107	34	926	EPHX2,PTGER3,F2RL1,PTH1R,PPARGC1A,NR3C2,CX3CL1,KNG1,NR1H4,GOT1,CA2,RHCG,NPY1R,CALB1,ANK2,NOX4,CUBN,TFAP2B,SLC4A1,MT1E,MT1F,MT1G,MT1H,RGN,MT1X,SLC34A1,PDE8B,ATP6V0A4,LRP2,ATP1A1,SLC4A4,ATP1B1,PCK1,PCK2
GO: Biological Process	GO:1990169	stress response to copper ion			2.073e-06	0.01089	0.0001281	0.001171	5	15	MT1E,MT1F,MT1G,MT1H,MT1X
GO: Biological Process	GO:0010273	detoxification of copper ion			2.073e-06	0.01089	0.0001281	0.001171	5	15	MT1E,MT1F,MT1G,MT1H,MT1X
GO: Biological Process	GO:0006812	cation transport			2.244e-06	0.01178	0.000137	0.001253	45	1423	PCP4,MAOB,SLC17A3,SPINK1,PDZK1,PTGER3,PPARGC1A,TRPM3,KCNJ1,HPN,KCNJ15,KCNJ16,AK4,SLC5A12,CX3CL1,RHCG,ANK2,ANK3,ANXA3,SLC13A3,CUBN,SLC44A4,AQP1,ARG2,ACE2,SLC6A13,RGN,SLC10A2,SHANK2,SLC12A1,EGF,SLC12A3,SLC13A1,SLC15A2,SLC17A1,SLC34A1,SLC22A2,SLC22A5,ATP6V0A4,LRP2,ATP1A1,SLC4A4,ATP1B1,FXYD2,CYB5A
GO: Biological Process	GO:0009064	glutamine family amino acid metabolic process			2.495e-06	0.0131	0.0001506	0.001377	9	77	GAD1,DDAH1,DAO,PRODH2,NR1H4,GOT1,ARG2,ASS1,AGMAT
GO: Biological Process	GO:0008015	blood circulation			2.802e-06	0.01471	0.0001672	0.001529	26	615	EPHX2,DDAH1,PTGER3,F2RL1,MET,KL,ACSM3,PTPRO,FGB,MME,HSD11B2,CX3CL1,KLK1,KNG1,TBX2,COL4A3,NPR1,NPR3,NPY1R,ANK2,REN,ACE2,ATP1A1,ATP1B1,FXYD2,ENPEP
GO: Biological Process	GO:0009065	glutamine family amino acid catabolic process			3.322e-06	0.01744	0.000196	0.001792	6	28	GAD1,DDAH1,DAO,PRODH2,GOT1,ARG2
GO: Biological Process	GO:0015701	bicarbonate transport			3.509e-06	0.01843	0.0002048	0.001872	7	43	SLC26A4,PTGER3,CA2,CA12,AQP1,SLC4A1,SLC4A4
GO: Biological Process	GO:1903825	organic acid transmembrane transport			3.839e-06	0.02016	0.0002191	0.002003	14	208	SLC17A3,SLC26A4,SLC5A12,SLC27A2,RBP4,SLC13A3,SLC3A1,SLC7A9,SLC6A13,SLC10A2,SLC13A1,SLC16A4,SLC17A1,LRP2
GO: Biological Process	GO:1905039	carboxylic acid transmembrane transport			3.839e-06	0.02016	0.0002191	0.002003	14	208	SLC17A3,SLC26A4,SLC5A12,SLC27A2,RBP4,SLC13A3,SLC3A1,SLC7A9,SLC6A13,SLC10A2,SLC13A1,SLC16A4,SLC17A1,LRP2
GO: Biological Process	GO:0019755	one-carbon compound transport			4.166e-06	0.02188	0.0002327	0.002128	5	17	CA2,CA12,AQP1,AQP3,SLC14A1
GO: Biological Process	GO:0061687	detoxification of inorganic compound			4.166e-06	0.02188	0.0002327	0.002128	5	17	MT1E,MT1F,MT1G,MT1H,MT1X
GO: Biological Process	GO:0055078	sodium ion homeostasis			4.286e-06	0.02251	0.0002369	0.002166	8	62	NR3C2,NPR1,ANPEP,TFAP2B,SLC12A1,SLC12A3,ATP1A1,ATP1B1
GO: Biological Process	GO:0071248	cellular response to metal ion			4.533e-06	0.0238	0.0002463	0.002252	14	211	AOC1,PPARGC1A,KCNJ1,ANK3,AQP1,TFAP2A,MT1E,MT1F,MT1G,MT1H,MT1X,SLC34A1,AKR1C3,CDH1
GO: Biological Process	GO:0072359	circulatory system development			4.55e-06	0.02389	0.0002463	0.002252	42	1322	TSPAN12,SOX9,ERBB3,ERBB4,ARHGAP24,DDAH1,GATA3,ADGRG1,MECOM,CCN6,MET,KCNJ1,HPGD,ANGPTL3,FGF1,FGF9,VAV3,PLG,CX3CL1,TBX2,COL4A3,COL4A4,NPR1,NPY1R,SORBS2,THSD7A,ANK2,NEBL,ANPEP,HYAL1,ANXA3,RBP4,NOX4,AQP1,TFAP2A,TFAP2B,EFNA1,EGF,GALNT11,SLC22A5,LRP2,ENPEP
GO: Biological Process	GO:0046942	carboxylic acid transport			4.787e-06	0.02514	0.0002565	0.002345	19	373	SLC17A3,SLC26A4,FABP1,SLC22A6,SLC5A12,NR1H4,SLC27A2,RBP4,SLC13A3,SLC3A1,ARG2,SLC7A9,ACE2,SLC6A13,SLC10A2,SLC13A1,SLC16A4,SLC17A1,LRP2
GO: Biological Process	GO:0015849	organic acid transport			4.975e-06	0.02612	0.0002639	0.002413	19	374	SLC17A3,SLC26A4,FABP1,SLC22A6,SLC5A12,NR1H4,SLC27A2,RBP4,SLC13A3,SLC3A1,ARG2,SLC7A9,ACE2,SLC6A13,SLC10A2,SLC13A1,SLC16A4,SLC17A1,LRP2
GO: Biological Process	GO:0072207	metanephric epithelium development			5.104e-06	0.0268	0.000268	0.00245	6	30	SOX9,ACAT1,NPHS2,UMOD,CALB1,AQP1
GO: Biological Process	GO:0097501	stress response to metal ion			5.697e-06	0.02992	0.0002933	0.002682	5	18	MT1E,MT1F,MT1G,MT1H,MT1X
GO: Biological Process	GO:0046459	short-chain fatty acid metabolic process			5.697e-06	0.02992	0.0002933	0.002682	5	18	TYRP1,PHYH,PCCA,PCK1,PCK2
GO: Biological Process	GO:0019626	short-chain fatty acid catabolic process			6.191e-06	0.03251	0.0003156	0.002886	4	9	PHYH,PCCA,PCK1,PCK2
GO: Biological Process	GO:0043648	dicarboxylic acid metabolic process			6.38e-06	0.0335	0.0003221	0.002945	10	109	GAD1,ALDH1L1,PRODH2,PHYH,NR1H4,GOT1,ASPA,ASS1,PCK1,PCK2
GO: Biological Process	GO:0046688	response to copper ion			6.503e-06	0.03415	0.0003221	0.002945	7	47	AOC1,AQP1,MT1E,MT1F,MT1G,MT1H,MT1X
GO: Biological Process	GO:0035850	epithelial cell differentiation involved in kidney development	1		6.503e-06	0.03415	0.0003221	0.002945	7	47	GATA3,MAGI2,NPHS2,PTPRO,NPHS1,PODXL,LHX1
GO: Biological Process	GO:0035725	sodium ion transmembrane transport			6.962e-06	0.03656	0.0003416	0.003124	14	219	SLC17A3,SLC5A12,ANK3,SLC13A3,SLC6A13,SLC10A2,SLC12A1,SLC12A3,SLC13A1,SLC34A1,ATP1A1,SLC4A4,ATP1B1,FXYD2
GO: Biological Process	GO:0071466	cellular response to xenobiotic stimulus			7.549e-06	0.03964	0.000358	0.003274	13	191	EPHX2,GLYAT,AOC1,CYP3A5,PPARGC1A,UGT2B28,FMO1,AQP1,CRYZ,ASS1,AKR7A3,PCK1,PCK2
GO: Biological Process	GO:0072112	glomerular visceral epithelial cell differentiation			7.636e-06	0.0401	0.000358	0.003274	5	19	MAGI2,NPHS2,PTPRO,NPHS1,PODXL
GO: Biological Process	GO:0072189	ureter development			7.636e-06	0.0401	0.000358	0.003274	5	19	SOX9,GATA3,MECOM,LHX1,EMX2
GO: Biological Process	GO:0061318	renal filtration cell differentiation	1		7.636e-06	0.0401	0.000358	0.003274	5	19	MAGI2,NPHS2,PTPRO,NPHS1,PODXL
GO: Biological Process	GO:0006577	amino-acid betaine metabolic process			7.636e-06	0.0401	0.000358	0.003274	5	19	ACADL,BHMT,BHMT2,BBOX1,SLC22A5
GO: Biological Process	GO:0097164	ammonium ion metabolic process			7.725e-06	0.04057	0.000359	0.003282	14	221	CDS1,MAOA,ACADL,MAOB,DAO,DDC,BHMT,BBOX1,NPR1,SLC44A4,LIPC,SLC22A5,AKR1C3,AGMAT
GO: Biological Process	GO:0003073	regulation of systemic arterial blood pressure			8.137e-06	0.04273	0.0003748	0.003427	10	112	DDAH1,F2RL1,KL,PTPRO,MME,HSD11B2,KLK1,REN,ACE2,ENPEP
GO: Biological Process	GO:0006625	protein targeting to peroxisome			8.661e-06	0.04548	0.0003825	0.003497	8	68	EPHX2,PIPOX,DAO,ACOX2,PHYH,SLC27A2,EHHADH,HAO2
GO: Biological Process	GO:0072663	establishment of protein localization to peroxisome			8.661e-06	0.04548	0.0003825	0.003497	8	68	EPHX2,PIPOX,DAO,ACOX2,PHYH,SLC27A2,EHHADH,HAO2
GO: Biological Process	GO:0072662	protein localization to peroxisome			8.661e-06	0.04548	0.0003825	0.003497	8	68	EPHX2,PIPOX,DAO,ACOX2,PHYH,SLC27A2,EHHADH,HAO2
GO: Biological Process	GO:0055081	anion homeostasis			8.661e-06	0.04548	0.0003825	0.003497	8	68	ANGPTL3,NR1H4,GOT1,CA12,TFAP2B,SLC12A1,SLC12A3,SLC34A1
GO: Biological Process	GO:0048871	multicellular organismal homeostasis			8.668e-06	0.04551	0.0003825	0.003497	23	537	SOX9,ERBB4,ACADL,AZGP1,ESRRG,GATM,PBLD,PTGER3,PTH1R,MET,PPARGC1A,KCNJ1,PLCL1,CA2,NPR3,RBP4,NOX4,CUBN,AQP1,AQP3,TFAP2B,SLC22A5,CDH1
GO: Biological Process	GO:0001505	regulation of neurotransmitter levels			8.741e-06	0.0459	0.0003825	0.003497	20	425	RIDA,GLYAT,GAD1,UPB1,DDAH1,MAOA,MAOB,DDC,BHMT,CLU,GLDC,NR3C2,ALDH6A1,DPYS,SLC44A4,ARG2,RGN,SLC22A2,ASS1,GABRA2
GO: Biological Process	GO:0055065	metal ion homeostasis			9.623e-06	0.05053	0.0004176	0.003819	28	741	EPHX2,PTGER3,F2RL1,PTH1R,KL,NR3C2,CX3CL1,KNG1,GOT1,NPR1,NPY1R,CALB1,ANK2,ANK3,ANPEP,CUBN,TFAP2B,MT1E,MT1F,MT1G,MT1H,RGN,MT1X,SLC12A1,SLC12A3,LRP2,ATP1A1,ATP1B1
GO: Biological Process	GO:0072311	glomerular epithelial cell differentiation			1.006e-05	0.0528	0.0004328	0.003957	5	20	MAGI2,NPHS2,PTPRO,NPHS1,PODXL
GO: Biological Process	GO:0001823	mesonephros development			1.03e-05	0.05407	0.0004361	0.003987	10	115	SOX9,GATA3,FGF1,SDC4,HNF1B,CALB1,REN,ARG2,LHX1,TACSTD2
GO: Biological Process	GO:0018958	phenol-containing compound metabolic process			1.03e-05	0.05407	0.0004361	0.003987	10	115	MAOA,MAOB,GATA3,DAO,DDC,TYRP1,KL,HPN,DIO1,NPR1
GO: Biological Process	GO:0043574	peroxisomal transport			1.077e-05	0.05657	0.0004526	0.004138	8	70	EPHX2,PIPOX,DAO,ACOX2,PHYH,SLC27A2,EHHADH,HAO2
GO: Biological Process	GO:0006066	alcohol metabolic process			1.161e-05	0.06096	0.0004838	0.004424	19	397	EPHX2,IMPA2,ACADL,HMGCS2,PTH1R,ADH6,ANGPTL3,FGF1,PLCL1,NR1H4,GOT1,RBP4,CUBN,LIPC,SLC34A1,MTTP,AKR1C3,PCK1,PCK2
GO: Biological Process	GO:0022600	digestive system process			1.2e-05	0.063	0.000496	0.004536	10	117	SOX9,PBLD,PTGER3,FABP1,PLS1,NPR3,RBP4,AQP1,SLC2A2,SLC22A5
GO: Biological Process	GO:0006720	isoprenoid metabolic process			1.21e-05	0.06354	0.0004964	0.004539	11	143	CYP3A5,ALDH8A1,HMGCS2,APOM,ADH6,PHYH,GPC4,SDC4,RBP4,AKR1C3,LRP2
GO: Biological Process	GO:0001889	liver development			1.244e-05	0.06532	0.0005064	0.00463	12	171	SOX9,UPB1,ACAT1,MET,HPN,COBL,AK4,HNF1B,RGN,ASS1,PCK1,PCK2
GO: Biological Process	GO:0072234	metanephric nephron tubule development			1.303e-05	0.06844	0.0005265	0.004814	5	21	SOX9,ACAT1,UMOD,CALB1,AQP1
GO: Biological Process	GO:0061218	negative regulation of mesonephros development			1.372e-05	0.07206	0.0005482	0.005012	3	4	GATA3,HNF1B,TACSTD2
GO: Biological Process	GO:0015672	monovalent inorganic cation transport			1.378e-05	0.07236	0.0005482	0.005012	27	714	SLC17A3,PTGER3,KCNJ1,HPN,KCNJ15,KCNJ16,AK4,SLC5A12,ANK2,ANK3,SLC13A3,AQP1,SLC6A13,SLC10A2,SLC12A1,SLC12A3,SLC13A1,SLC15A2,SLC17A1,SLC34A1,SLC22A5,ATP6V0A4,ATP1A1,SLC4A4,ATP1B1,FXYD2,CYB5A
GO: Biological Process	GO:0015850	organic hydroxy compound transport			1.42e-05	0.07457	0.0005567	0.00509	16	298	PCP4,MAOB,PTGER3,APOM,CLU,SLC5A12,NR1H4,RBP4,REN,AQP1,AQP3,LIPC,SLC10A2,EGF,OSBPL3,GRAMD1C
GO: Biological Process	GO:0098659	inorganic cation import across plasma membrane			1.431e-05	0.07516	0.0005567	0.00509	9	95	KCNJ1,KCNJ15,KCNJ16,SLC12A1,SLC12A3,SLC34A1,ATP1A1,ATP1B1,FXYD2
GO: Biological Process	GO:0099587	inorganic ion import across plasma membrane			1.431e-05	0.07516	0.0005567	0.00509	9	95	KCNJ1,KCNJ15,KCNJ16,SLC12A1,SLC12A3,SLC34A1,ATP1A1,ATP1B1,FXYD2
GO: Biological Process	GO:0061008	hepaticobiliary system development			1.482e-05	0.07784	0.0005723	0.005233	12	174	SOX9,UPB1,ACAT1,MET,HPN,COBL,AK4,HNF1B,RGN,ASS1,PCK1,PCK2
GO: Biological Process	GO:0042135	neurotransmitter catabolic process			1.666e-05	0.08748	0.0006385	0.005838	5	22	MAOA,MAOB,BHMT,GLDC,ALDH6A1
GO: Biological Process	GO:0009719	response to endogenous stimulus			1.68e-05	0.0882	0.0006391	0.005844	51	1834	SOX9,ERBB4,AOC1,GALNT3,MAOB,ACAT1,ESRRG,GATA3,GATM,PBLD,DDC,MAGI2,PPARGC1A,KL,HPGD,HPN,ANGPTL3,FGB,FGF1,FGF9,NR3C2,KHK,FGFR3,HSD11B2,ALDOB,NR1H4,GOT1,CA2,RAP1GAP,SORBS2,HYAL1,ANXA3,SH3GL2,RBP4,GRB14,SOSTDC1,NOX4,REN,AQP1,TFAP2B,CRYAB,LHX1,SLC34A1,ATP6V0A4,ASS1,AKR1C3,LRP2,ATP1A1,CDH1,PCK1,PCK2
GO: Biological Process	GO:0006721	terpenoid metabolic process			1.734e-05	0.09106	0.0006551	0.00599	10	122	CYP3A5,ALDH8A1,HMGCS2,APOM,ADH6,GPC4,SDC4,RBP4,AKR1C3,LRP2
GO: Biological Process	GO:0030258	lipid modification			1.815e-05	0.09533	0.0006806	0.006223	16	304	EPHX2,IMPA2,ACADL,ACAT1,CYP3A5,PLPPR1,ACOX2,FABP1,PPARGC1A,PHYH,PIP5K1B,VAV3,FGFR3,SLC27A2,EHHADH,HAO2
GO: Biological Process	GO:0071276	cellular response to cadmium ion			1.827e-05	0.09596	0.0006806	0.006223	6	37	MT1E,MT1F,MT1G,MT1H,MT1X,AKR1C3
GO: Biological Process	GO:0042136	neurotransmitter biosynthetic process			1.999e-05	0.105	0.0007393	0.00676	10	124	GAD1,UPB1,DDAH1,DDC,CLU,SLC44A4,ARG2,RGN,SLC22A2,ASS1
GO: Biological Process	GO:0002003	angiotensin maturation			2.346e-05	0.1232	0.000859	0.007855	4	12	MME,REN,ACE2,ENPEP
GO: Biological Process	GO:0071241	cellular response to inorganic substance			2.356e-05	0.1237	0.000859	0.007855	14	244	AOC1,PPARGC1A,KCNJ1,ANK3,AQP1,TFAP2A,MT1E,MT1F,MT1G,MT1H,MT1X,SLC34A1,AKR1C3,CDH1
GO: Biological Process	GO:0006694	steroid biosynthetic process			2.418e-05	0.127	0.0008757	0.008007	13	213	HMGCS2,ACOX2,PPARGC1A,TFCP2L1,FGF1,HSD11B2,HSD17B2,NR1H4,SLC27A2,PDE8B,OSBPL3,AKR1C3,ATP1A1
GO: Biological Process	GO:0033993	response to lipid			2.479e-05	0.1302	0.0008916	0.008153	33	1000	SOX9,RIDA,MAOB,ESRRG,PTGER3,PPARGC1A,CLU,GLDC,HPGD,NR3C2,HSD11B2,HSD17B2,CX3CL1,NR1H4,GOT1,CA2,FMO1,ANXA3,RBP4,REN,MAP7,AQP1,AQP3,TFAP2A,CRYAB,SLC34A1,ASS1,SLPI,AKR1C3,ATP1A1,GRAMD1C,PCK1,PCK2
GO: Biological Process	GO:0022610	biological adhesion			2.521e-05	0.1324	0.0009004	0.008232	44	1516	CHL1,SOX9,ERBB3,AZGP1,GATA3,PERP,ADGRG1,CLEC4M,PTGER3,CCN6,MAGI2,SERPINI1,PTPRO,GPC4,ANGPTL3,FGB,UMOD,VAV3,PLG,CX3CL1,SDC4,KNG1,NPHS1,COL4A3,RAP1GAP,DSC1,ANK3,PODXL,HYAL1,ANXA3,CLDN7,CLDN10,CLDN8,SLC4A1,ARG2,ACE2,EFNA1,ASS1,ATP1B1,MUC1,TACSTD2,CDH1,CDH6,CDH16
GO: Biological Process	GO:0098655	cation transmembrane transport			2.553e-05	0.134	0.0009057	0.008281	36	1138	SLC17A3,PDZK1,PTGER3,PPARGC1A,TRPM3,KCNJ1,HPN,KCNJ15,KCNJ16,AK4,SLC5A12,CX3CL1,RHCG,ANK2,ANK3,ANXA3,SLC13A3,SLC44A4,AQP1,SLC6A13,RGN,SLC10A2,SHANK2,SLC12A1,SLC12A3,SLC13A1,SLC15A2,SLC34A1,SLC22A2,SLC22A5,ATP6V0A4,ATP1A1,SLC4A4,ATP1B1,FXYD2,CYB5A
GO: Biological Process	GO:0010842	retina layer formation			2.623e-05	0.1377	0.000912	0.008339	5	24	TSPAN12,CALB1,TFAP2A,TFAP2B,LHX1
GO: Biological Process	GO:0072010	glomerular epithelium development			2.623e-05	0.1377	0.000912	0.008339	5	24	MAGI2,NPHS2,PTPRO,NPHS1,PODXL
GO: Biological Process	GO:0001991	regulation of systemic arterial blood pressure by circulatory renin-angiotensin			2.623e-05	0.1377	0.000912	0.008339	5	24	F2RL1,MME,REN,ACE2,ENPEP
GO: Biological Process	GO:0061005	cell differentiation involved in kidney development			2.695e-05	0.1415	0.0009312	0.008514	7	58	GATA3,MAGI2,NPHS2,PTPRO,NPHS1,PODXL,LHX1
GO: Biological Process	GO:0051897	positive regulation of protein kinase B signaling			2.881e-05	0.1513	0.0009858	0.009014	12	186	ERBB3,ERBB4,GATA3,MET,KL,FGF1,FGF9,FGFR3,CX3CL1,NOX4,EGF,AKR1C3
GO: Biological Process	GO:0007586	digestion			2.905e-05	0.1525	0.0009858	0.009014	11	157	SOX9,PBLD,PTGER3,FABP1,PPARGC1A,PLS1,NPR3,RBP4,AQP1,SLC2A2,SLC22A5
GO: Biological Process	GO:0005996	monosaccharide metabolic process			2.91e-05	0.1528	0.0009858	0.009014	16	316	PPARGC1A,KHK,UGT2B28,ALDOB,GOT1,NPY1R,RBP4,TFAP2B,CRYL1,RGN,UGT2A3,G6PC,DCXR,PCK1,PCK2,CYB5A
GO: Biological Process	GO:0009712	catechol-containing compound metabolic process			3.019e-05	0.1585	0.00101	0.009232	7	59	MAOA,MAOB,GATA3,DAO,DDC,KL,NPR1
GO: Biological Process	GO:0006584	catecholamine metabolic process			3.019e-05	0.1585	0.00101	0.009232	7	59	MAOA,MAOB,GATA3,DAO,DDC,KL,NPR1
GO: Biological Process	GO:0072330	monocarboxylic acid biosynthetic process			3.08e-05	0.1617	0.001021	0.009333	14	250	EPHX2,GAD1,ACADL,ALDH8A1,GATM,ACOX2,ACSM3,HPGD,NR1H4,SLC27A2,RGN,LIPC,OSBPL3,AKR1C3
GO: Biological Process	GO:0006873	cellular ion homeostasis			3.11e-05	0.1633	0.001021	0.009333	27	748	EPHX2,PTGER3,F2RL1,PTH1R,NR3C2,CX3CL1,KNG1,GOT1,CA2,RHCG,NPY1R,CALB1,ANK2,CUBN,SLC4A1,MT1E,MT1F,MT1G,MT1H,RGN,MT1X,SLC34A1,ATP6V0A4,LRP2,ATP1A1,SLC4A4,ATP1B1
GO: Biological Process	GO:0008610	lipid biosynthetic process			3.11e-05	0.1633	0.001021	0.009333	27	748	EPHX2,CDS1,ACADL,ALDH8A1,HMGCS2,ACOX2,SH3YL1,PPARGC1A,TFCP2L1,ACSM3,HPGD,FGF1,PIP5K1B,HSD11B2,HSD17B2,NR1H4,SLC27A2,CWH43,SLC44A4,RGN,LIPC,PDE8B,OSBPL3,AKR1C3,ATP1A1,PCK1,PCK2
GO: Biological Process	GO:0072170	metanephric tubule development			3.238e-05	0.17	0.001056	0.009655	5	25	SOX9,ACAT1,UMOD,CALB1,AQP1
GO: Biological Process	GO:0140352	export from cell			3.276e-05	0.172	0.00106	0.009693	48	1730	PCP4,GAD1,AOC1,MAOB,SLC17A3,PDZK1,ACP3,GATA3,PTGER3,F2RL1,CLU,FGB,NR3C2,MME,PLG,CX3CL1,SDC4,KNG1,NR1H4,IL17RB,SLC27A2,HNF1B,A1CF,NPY1R,RAB25,DSC1,ANPEP,ANXA3,RBP4,REN,SLC44A4,AQP1,TFAP2B,SLC2A2,ARG2,FRK,EGF,SLCO4C1,SLC15A2,PDE8B,SLC22A2,SLPI,MTTP,LRP2,ATP1A1,ATP1B1,FXYD2,PCK2
GO: Biological Process	GO:0002002	regulation of angiotensin levels in blood			3.348e-05	0.1758	0.00106	0.009693	4	13	MME,REN,ACE2,ENPEP
GO: Biological Process	GO:0072015	glomerular visceral epithelial cell development			3.348e-05	0.1758	0.00106	0.009693	4	13	MAGI2,NPHS2,NPHS1,PODXL
GO: Biological Process	GO:0090102	cochlea development			3.374e-05	0.1772	0.00106	0.009693	7	60	SOX9,GATA3,HPN,PVALB,FGFR3,CALB1,CDH1
GO: Biological Process	GO:0072593	reactive oxygen species metabolic process			3.387e-05	0.1778	0.00106	0.009693	16	320	EPHX2,DDAH1,MAOB,F2RL1,CCN6,MET,CLU,GPX3,NOX4,TFAP2A,ARG2,CRYAB,ACE2,RGN,ASS1,AKR1C3
GO: Biological Process	GO:0019482	beta-alanine metabolic process			3.392e-05	0.1781	0.00106	0.009693	3	5	UPB1,ALDH6A1,DPYS
GO: Biological Process	GO:0006114	glycerol biosynthetic process			3.392e-05	0.1781	0.00106	0.009693	3	5	GOT1,PCK1,PCK2
GO: Biological Process	GO:0001523	retinoid metabolic process			3.458e-05	0.1816	0.001067	0.009757	9	106	CYP3A5,ALDH8A1,APOM,ADH6,GPC4,SDC4,RBP4,AKR1C3,LRP2
GO: Biological Process	GO:0019395	fatty acid oxidation			3.458e-05	0.1816	0.001067	0.009757	9	106	ACADL,ACAT1,ACOX2,FABP1,PPARGC1A,PHYH,SLC27A2,EHHADH,HAO2
GO: Biological Process	GO:0008652	cellular amino acid biosynthetic process			3.475e-05	0.1825	0.001067	0.009757	8	82	GAD1,UPB1,BHMT,BHMT2,GOT1,ASPA,ASS1,FOLH1B
GO: Biological Process	GO:0019637	organophosphate metabolic process			3.568e-05	0.1874	0.001089	0.009961	37	1203	GLYAT,CDS1,PDE1A,IMPA2,ACADSB,ACAT1,ACP3,PIPOX,HMGCS2,PLPPR1,PTH1R,SH3YL1,PPARGC1A,ACSM3,SULT1C2,ANGPTL3,PIP5K1B,AK4,KHK,VAV3,FGFR3,PLCL1,ALDOB,NR1H4,NPR1,CWH43,ACSF2,SLC44A4,SLC4A1,CRYL1,LIPC,EHHADH,PDE8B,OGDHL,G6PC,DCXR,PCK1
GO: Biological Process	GO:0050878	regulation of body fluid levels			3.649e-05	0.1916	0.001108	0.01013	22	548	ERBB4,GATA3,PTGER3,F2RL1,MET,PTPRO,FGB,VAV3,HSD11B2,PLG,CX3CL1,KNG1,NPR1,NPR3,AQP1,AQP3,TFAP2B,SLC4A1,SLC22A2,TSPAN8,CDH1,SERPINA5
GO: Biological Process	GO:0051180	vitamin transport			3.869e-05	0.2032	0.001168	0.01068	6	42	AFM,RBP4,CUBN,SLC44A4,SLC2A2,LRP2
GO: Biological Process	GO:0098739	import across plasma membrane			3.911e-05	0.2053	0.001173	0.01073	10	134	KCNJ1,KCNJ15,KCNJ16,SLC12A1,SLC12A3,SLC34A1,LRP2,ATP1A1,ATP1B1,FXYD2
GO: Biological Process	GO:0071294	cellular response to zinc ion			3.959e-05	0.2079	0.001181	0.0108	5	26	MT1E,MT1F,MT1G,MT1H,MT1X
GO: Biological Process	GO:0034440	lipid oxidation			4.012e-05	0.2107	0.00119	0.01088	9	108	ACADL,ACAT1,ACOX2,FABP1,PPARGC1A,PHYH,SLC27A2,EHHADH,HAO2
GO: Biological Process	GO:0060042	retina morphogenesis in camera-type eye			4.186e-05	0.2198	0.001235	0.01129	7	62	TSPAN12,SOX9,CALB1,RBP4,TFAP2A,TFAP2B,LHX1
GO: Biological Process	GO:0042632	cholesterol homeostasis			4.315e-05	0.2266	0.001266	0.01157	9	109	EPHX2,APOM,ACSM3,HPN,ANGPTL3,NR1H4,LIPC,MTTP,G6PC
GO: Biological Process	GO:0048593	camera-type eye morphogenesis			4.439e-05	0.2331	0.001288	0.01178	10	136	TSPAN12,SOX9,FGFR3,TBX2,CALB1,RBP4,AQP1,TFAP2A,TFAP2B,LHX1
GO: Biological Process	GO:0072210	metanephric nephron development			4.439e-05	0.2331	0.001288	0.01178	6	43	SOX9,NPHS2,AQP1,TFAP2A,TFAP2B,LHX1
GO: Biological Process	GO:0048839	inner ear development			4.48e-05	0.2352	0.001293	0.01182	13	226	SOX9,GATA3,CLIC5,HPN,PVALB,FGF9,FGFR3,SDC4,CALB1,CXCL14,SLC44A4,TFAP2A,CDH1
GO: Biological Process	GO:0072310	glomerular epithelial cell development			4.631e-05	0.2432	0.001316	0.01204	4	14	MAGI2,NPHS2,NPHS1,PODXL
GO: Biological Process	GO:0001657	ureteric bud development			4.638e-05	0.2435	0.001316	0.01204	9	110	SOX9,GATA3,FGF1,SDC4,HNF1B,CALB1,ARG2,LHX1,TACSTD2
GO: Biological Process	GO:0055092	sterol homeostasis			4.638e-05	0.2435	0.001316	0.01204	9	110	EPHX2,APOM,ACSM3,HPN,ANGPTL3,NR1H4,LIPC,MTTP,G6PC
GO: Biological Process	GO:0007155	cell adhesion			4.833e-05	0.2538	0.001364	0.01247	43	1509	CHL1,SOX9,ERBB3,AZGP1,GATA3,PERP,ADGRG1,CLEC4M,PTGER3,CCN6,MAGI2,SERPINI1,PTPRO,GPC4,ANGPTL3,FGB,UMOD,VAV3,PLG,CX3CL1,SDC4,KNG1,NPHS1,COL4A3,RAP1GAP,DSC1,ANK3,PODXL,HYAL1,ANXA3,CLDN7,CLDN10,CLDN8,SLC4A1,ARG2,EFNA1,ASS1,ATP1B1,MUC1,TACSTD2,CDH1,CDH6,CDH16
GO: Biological Process	GO:0072164	mesonephric tubule development			4.981e-05	0.2616	0.001391	0.01272	9	111	SOX9,GATA3,FGF1,SDC4,HNF1B,CALB1,ARG2,LHX1,TACSTD2
GO: Biological Process	GO:0072163	mesonephric epithelium development			4.981e-05	0.2616	0.001391	0.01272	9	111	SOX9,GATA3,FGF1,SDC4,HNF1B,CALB1,ARG2,LHX1,TACSTD2
GO: Biological Process	GO:0007031	peroxisome organization			5.336e-05	0.2802	0.001476	0.0135	8	87	EPHX2,PIPOX,DAO,ACOX2,PHYH,SLC27A2,EHHADH,HAO2
GO: Biological Process	GO:0016101	diterpenoid metabolic process			5.345e-05	0.2807	0.001476	0.0135	9	112	CYP3A5,ALDH8A1,APOM,ADH6,GPC4,SDC4,RBP4,AKR1C3,LRP2
GO: Biological Process	GO:0051260	protein homooligomerization			5.369e-05	0.2819	0.001476	0.0135	18	406	UPB1,ACADL,LZTS3,ACAT1,ACP3,NELL1,SLC22A6,CLU,DPYS,GPX3,CLDN7,CUBN,CRYAB,CRYZ,SLC34A1,CDH1,HAO2,DCXR
GO: Biological Process	GO:0098660	inorganic ion transmembrane transport			5.539e-05	0.2908	0.001515	0.01385	34	1088	SLC17A3,SLC26A4,PTGER3,CLIC5,CLCNKB,TRPM3,KCNJ1,HPN,KCNJ15,KCNJ16,AK4,SLC5A12,CX3CL1,ANK2,ANK3,SLC13A3,AQP1,SLC4A1,SLC6A13,RGN,SLC10A2,SLC12A1,SLC12A3,SLC13A1,SLC15A2,SLC17A1,SLC34A1,ATP6V0A4,ATP1A1,SLC4A4,ATP1B1,FXYD2,CYB5A,GABRA2
GO: Biological Process	GO:0061217	regulation of mesonephros development			5.77e-05	0.303	0.00157	0.01435	5	28	SOX9,GATA3,HNF1B,LHX1,TACSTD2
GO: Biological Process	GO:0006869	lipid transport			5.902e-05	0.3099	0.001597	0.01461	18	409	TMEM30B,FABP1,ABCB1,APOM,CLU,NR1H4,SLC27A2,GULP1,RBP4,REN,SLC4A1,LIPC,SLC10A2,EGF,OSBPL3,MTTP,GRAMD1C,SERPINA5
GO: Biological Process	GO:0055088	lipid homeostasis			6.023e-05	0.3162	0.001621	0.01482	11	170	EPHX2,ACOX2,APOM,ACSM3,HPN,ANGPTL3,NR1H4,GOT1,LIPC,MTTP,G6PC
GO: Biological Process	GO:0010876	lipid localization			6.051e-05	0.3178	0.001621	0.01482	19	448	TMEM30B,FABP1,ABCB1,APOM,CLU,ANGPTL3,NR1H4,SLC27A2,GULP1,RBP4,REN,SLC4A1,LIPC,SLC10A2,EGF,OSBPL3,MTTP,GRAMD1C,SERPINA5
GO: Biological Process	GO:0001990	regulation of systemic arterial blood pressure by hormone			6.565e-05	0.3447	0.00175	0.016	6	46	F2RL1,MME,HSD11B2,REN,ACE2,ENPEP
GO: Biological Process	GO:1990961	xenobiotic detoxification by transmembrane export across the plasma membrane			6.707e-05	0.3522	0.00177	0.01618	3	6	SLC17A3,PDZK1,SLC15A2
GO: Biological Process	GO:0019401	alditol biosynthetic process			6.707e-05	0.3522	0.00177	0.01618	3	6	GOT1,PCK1,PCK2
GO: Biological Process	GO:0035809	regulation of urine volume			6.885e-05	0.3616	0.001808	0.01653	5	29	PTGER3,NPR1,NPR3,TFAP2B,SLC4A1
GO: Biological Process	GO:0046903	secretion			6.962e-05	0.3656	0.001819	0.01663	49	1834	PCP4,GAD1,ERBB3,ERBB4,AOC1,MAOB,ACP3,GATA3,PTGER3,F2RL1,SLC22A6,CLU,FGB,NR3C2,MME,PLG,CX3CL1,SDC4,KNG1,NR1H4,IL17RB,CA2,SLC27A2,NPHS1,HNF1B,NPR1,NPR3,A1CF,NPY1R,RAB25,DSC1,ANPEP,ANXA3,RBP4,REN,SLC44A4,AQP1,TFAP2B,SLC2A2,ARG2,FRK,EGF,SLCO4C1,PDE8B,SLC22A2,SLPI,MTTP,LRP2,PCK2
GO: Biological Process	GO:0072521	purine-containing compound metabolic process			7.008e-05	0.368	0.001822	0.01666	23	614	GLYAT,PDE1A,SLC17A3,ACADSB,ACAT1,ACP3,PIPOX,HMGCS2,PPARGC1A,ACSM3,SULT1C2,AK4,KHK,ALDOB,NPR1,AOX1,ACSF2,SLC4A1,SLC17A1,EHHADH,PDE8B,OGDHL,G6PC
GO: Biological Process	GO:0015893	drug transport			7.284e-05	0.3825	0.001884	0.01723	13	237	PCP4,CA2,CA12,RBP4,SLC13A3,CUBN,SLC44A4,AQP1,ARG2,SLC13A1,SLC22A2,SLC22A5,LRP2
GO: Biological Process	GO:0006081	cellular aldehyde metabolic process			7.636e-05	0.4009	0.001956	0.01789	7	68	ALDH8A1,PRODH2,KHK,ALDOB,RBP4,AKR7A3,AKR1C3
GO: Biological Process	GO:0098661	inorganic anion transmembrane transport			7.637e-05	0.401	0.001956	0.01789	10	145	SLC26A4,CLIC5,CLCNKB,SLC4A1,SLC12A1,SLC12A3,SLC13A1,SLC17A1,SLC34A1,GABRA2
GO: Biological Process	GO:1901135	carbohydrate derivative metabolic process			8.066e-05	0.4235	0.002056	0.0188	38	1299	GLYAT,PDE1A,UPB1,GALNT3,ACADSB,ACAT1,ACP3,PIPOX,HMGCS2,PPARGC1A,ACSM3,SULT1C2,GPC4,AK4,KHK,ALDOB,SDC4,GALNT14,DPYS,NPR1,CWH43,HYAL1,ACSF2,MAP7,SLC4A1,GBA3,CRYL1,LIPC,EGF,SLC34A1,EHHADH,GALNT11,PDE8B,AKR1C3,OGDHL,MUC1,G6PC,DCXR
GO: Biological Process	GO:0072337	modified amino acid transport			8.16e-05	0.4285	0.00207	0.01893	5	30	PDZK1,SLC3A1,SLC7A9,SLC22A5,LRP2
GO: Biological Process	GO:0035810	positive regulation of urine volume			8.22e-05	0.4317	0.002075	0.01897	4	16	PTGER3,NPR1,NPR3,TFAP2B
GO: Biological Process	GO:0016042	lipid catabolic process			8.548e-05	0.4489	0.002148	0.01964	16	346	ACADL,ACAT1,ACOX2,FABP1,PHYH,ANGPTL3,SLC27A2,GBA3,LIPC,EHHADH,AKR1C3,CYP4F3,PCCA,HAO2,PCK1,PCK2
GO: Biological Process	GO:0090596	sensory organ morphogenesis			8.593e-05	0.4512	0.002149	0.01965	15	310	TSPAN12,SOX9,GATA3,CLIC5,HPN,FGF9,FGFR3,TBX2,CALB1,RBP4,SLC44A4,AQP1,TFAP2A,TFAP2B,LHX1
GO: Biological Process	GO:0048514	blood vessel morphogenesis			9.454e-05	0.4965	0.002353	0.02151	26	755	TSPAN12,ARHGAP24,DDAH1,ADGRG1,CCN6,HPGD,ANGPTL3,FGF1,FGF9,VAV3,PLG,CX3CL1,TBX2,COL4A3,COL4A4,NPR1,THSD7A,ANPEP,HYAL1,ANXA3,AQP1,TFAP2B,EFNA1,EGF,LRP2,ENPEP
GO: Biological Process	GO:1900027	regulation of ruffle assembly			9.61e-05	0.5046	0.002369	0.02166	5	31	ARHGAP24,SH3YL1,COBL,EPS8L2,TACSTD2
GO: Biological Process	GO:0055075	potassium ion homeostasis			9.61e-05	0.5046	0.002369	0.02166	5	31	TFAP2B,SLC12A1,SLC12A3,ATP1A1,ATP1B1
GO: Biological Process	GO:0071805	potassium ion transmembrane transport			0.0001018	0.5347	0.002498	0.02284	13	245	PTGER3,KCNJ1,HPN,KCNJ15,KCNJ16,ANK2,ANK3,AQP1,SLC12A1,SLC12A3,ATP1A1,ATP1B1,FXYD2
GO: Biological Process	GO:0006790	sulfur compound metabolic process			0.0001164	0.611	0.002842	0.02598	17	393	GLYAT,ACADSB,ACAT1,ACP3,PIPOX,HMGCS2,BHMT,ACSM3,SULT1C2,BHMT2,HYAL1,GPX3,NOX4,ACSF2,MSRA,EHHADH,PCCA
GO: Biological Process	GO:0043269	regulation of ion transport			0.0001235	0.6486	0.003003	0.02746	27	812	PCP4,MAOB,SPINK1,PDZK1,PTGER3,ABCB1,PPARGC1A,CLIC5,CLCNKB,KCNJ1,KCNJ15,KCNJ16,CX3CL1,CA2,ANK2,ANK3,ANXA3,CLDN10,ARG2,ACE2,RGN,SHANK2,EGF,SLC34A1,ATP1A1,ATP1B1,FXYD2
GO: Biological Process	GO:0043491	protein kinase B signaling			0.0001305	0.6855	0.003125	0.02858	14	286	SOX9,ERBB3,ERBB4,GATA3,MAGI2,MET,KL,FGF1,FGF9,FGFR3,CX3CL1,NOX4,EGF,AKR1C3
GO: Biological Process	GO:0072488	ammonium transmembrane transport			0.0001309	0.6875	0.003125	0.02858	5	33	RHCG,SLC44A4,AQP1,SLC22A2,SLC22A5
GO: Biological Process	GO:0003081	regulation of systemic arterial blood pressure by renin-angiotensin			0.0001309	0.6875	0.003125	0.02858	5	33	F2RL1,MME,REN,ACE2,ENPEP
GO: Biological Process	GO:0055083	monovalent inorganic anion homeostasis			0.0001309	0.6875	0.003125	0.02858	5	33	CA12,TFAP2B,SLC12A1,SLC12A3,SLC34A1
GO: Biological Process	GO:0043649	dicarboxylic acid catabolic process			0.0001349	0.7085	0.003206	0.02931	4	18	GAD1,ALDH1L1,GOT1,ASPA
GO: Biological Process	GO:0009887	animal organ morphogenesis			0.0001461	0.7674	0.003457	0.03161	36	1240	TSPAN12,SOX9,SLC26A4,GATA3,PERP,MECOM,MAGI2,MET,CLIC5,HPN,GPC4,FGF1,FGF9,FGFR3,CA2,TBX2,HNF1B,NPY1R,CALB1,HYAL1,RBP4,SOSTDC1,SLC44A4,AQP1,AQP3,TFAP2A,TFAP2B,LHX1,EFNA1,SHANK2,SLC34A1,LRP2,ELF3,EMX2,TACSTD2,CDH1
GO: Biological Process	GO:0140115	export across plasma membrane			0.0001472	0.773	0.003466	0.03169	6	53	SLC17A3,PDZK1,SLC15A2,ATP1A1,ATP1B1,FXYD2
GO: Biological Process	GO:0030155	regulation of cell adhesion			0.0001495	0.7851	0.003505	0.03205	26	777	SOX9,ERBB3,GATA3,ADGRG1,PTGER3,MAGI2,SERPINI1,PTPRO,FGB,VAV3,PLG,CX3CL1,SDC4,KNG1,RAP1GAP,ANK3,PODXL,HYAL1,CLDN7,SLC4A1,ARG2,EFNA1,ASS1,MUC1,TACSTD2,CDH1
GO: Biological Process	GO:0030003	cellular cation homeostasis			0.000153	0.8035	0.003571	0.03265	25	734	EPHX2,PTGER3,F2RL1,PTH1R,NR3C2,CX3CL1,KNG1,GOT1,CA2,NPY1R,CALB1,ANK2,CUBN,SLC4A1,MT1E,MT1F,MT1G,MT1H,RGN,MT1X,ATP6V0A4,LRP2,ATP1A1,SLC4A4,ATP1B1
GO: Biological Process	GO:0042446	hormone biosynthetic process			0.0001537	0.8069	0.003571	0.03265	8	101	PPARGC1A,DIO1,HSD11B2,HSD17B2,SLC44A4,PDE8B,AKR1C3,ATP1A1
GO: Biological Process	GO:0043583	ear development			0.0001576	0.8276	0.003646	0.03334	13	256	SOX9,GATA3,CLIC5,HPN,PVALB,FGF9,FGFR3,SDC4,CALB1,CXCL14,SLC44A4,TFAP2A,CDH1
GO: Biological Process	GO:0007267	cell-cell signaling			0.0001625	0.8532	0.003742	0.03421	49	1899	TSPAN12,SOX9,GAD1,ERBB4,GATA3,ADGRG1,PTGER3,CCN6,MAGI2,MET,PTPRO,GPC4,FGB,FGF1,FGF9,NR3C2,FGFR3,PLCL1,MME,PLG,CX3CL1,NR1H4,CA2,TRHDE,HNF1B,NPY1R,SORBS2,CALB1,ANK2,ANK3,RBP4,SOSTDC1,CXCL14,REN,AQP1,TFAP2A,TFAP2B,SLC2A2,LHX1,EFNA1,SHANK2,EGF,PDE8B,SLC22A2,LRP2,CDH1,ENPEP,PCK2,GABRA2
GO: Biological Process	GO:0050886	endocrine process			0.0001646	0.8642	0.003774	0.03451	8	102	GATA3,F2RL1,MME,HSD11B2,REN,AQP1,ACE2,ENPEP
GO: Biological Process	GO:1905330	regulation of morphogenesis of an epithelium			0.00017	0.8926	0.003868	0.03537	11	191	SOX9,GATA3,MAGI2,MET,GPC4,FGF1,TBX2,HNF1B,LHX1,TACSTD2,CDH1
GO: Biological Process	GO:0051896	regulation of protein kinase B signaling			0.0001702	0.8936	0.003868	0.03537	13	258	ERBB3,ERBB4,GATA3,MAGI2,MET,KL,FGF1,FGF9,FGFR3,CX3CL1,NOX4,EGF,AKR1C3
GO: Biological Process	GO:0016999	antibiotic metabolic process			0.000179	0.9398	0.004051	0.03704	9	131	MAOB,ADH6,GPX3,SLC34A1,ASPA,AKR1C3,HAO2,PCK1,PCK2
GO: Biological Process	GO:0003044	regulation of systemic arterial blood pressure mediated by a chemical signal			0.0001812	0.9516	0.004084	0.03734	6	55	F2RL1,MME,HSD11B2,REN,ACE2,ENPEP
GO: Biological Process	GO:0009750	response to fructose			0.0001836	0.964	0.004085	0.03735	3	8	PPARGC1A,KHK,PCK1
GO: Biological Process	GO:0015670	carbon dioxide transport			0.0001836	0.964	0.004085	0.03735	3	8	CA2,CA12,AQP1
GO: Biological Process	GO:0006531	aspartate metabolic process			0.0001836	0.964	0.004085	0.03735	3	8	GOT1,ASPA,ASS1
GO: Biological Process	GO:0006882	cellular zinc ion homeostasis			0.0002004	1	0.004408	0.04031	5	36	MT1E,MT1F,MT1G,MT1H,MT1X
GO: Biological Process	GO:0032350	regulation of hormone metabolic process			0.0002004	1	0.004408	0.04031	6	56	GATA3,PPARGC1A,HPN,PDE8B,AKR1C3,ATP1A1
GO: Biological Process	GO:0006821	chloride transport			0.0002007	1	0.004408	0.04031	9	133	SLC26A4,ABCB1,CLIC5,CLCNKB,CA2,SLC4A1,SLC12A1,SLC12A3,GABRA2
GO: Biological Process	GO:0030001	metal ion transport			0.0002031	1	0.004445	0.04064	31	1022	SLC17A3,SPINK1,PTGER3,TRPM3,KCNJ1,HPN,KCNJ15,KCNJ16,SLC5A12,CX3CL1,ANK2,ANK3,SLC13A3,CUBN,AQP1,SLC6A13,RGN,SLC10A2,SLC12A1,EGF,SLC12A3,SLC13A1,SLC17A1,SLC34A1,SLC22A5,ATP6V0A4,LRP2,ATP1A1,SLC4A4,ATP1B1,FXYD2
GO: Biological Process	GO:0006071	glycerol metabolic process			0.0002086	1	0.004545	0.04156	4	20	ANGPTL3,GOT1,PCK1,PCK2
GO: Biological Process	GO:2000377	regulation of reactive oxygen species metabolic process			0.0002102	1	0.004561	0.0417	12	229	DDAH1,F2RL1,CCN6,CLU,NOX4,TFAP2A,ARG2,CRYAB,ACE2,RGN,ASS1,AKR1C3
GO: Biological Process	GO:0051270	regulation of cellular component movement			0.0002241	1	0.004842	0.04427	35	1219	SOX9,ERBB3,ERBB4,GATA3,ADGRG1,PBLD,PTGER3,F2RL1,MAGI2,DEFB1,MET,PPARGC1A,PTPRO,ANGPTL3,FGF1,FGF9,CX3CL1,SDC4,RAB25,ANK2,PODXL,HYAL1,ANXA3,CXCL14,NOX4,CLDN7,AQP1,TFAP2A,RGN,EFNA1,EGF,MST1L,ATP1A1,TACSTD2,CDH1
GO: Biological Process	GO:0006006	glucose metabolic process			0.0002277	1	0.004865	0.04449	12	231	PPARGC1A,KHK,ALDOB,GOT1,NPY1R,RBP4,TFAP2B,RGN,G6PC,DCXR,PCK1,PCK2
GO: Biological Process	GO:0020028	endocytic hemoglobin import into cell			0.0002335	1	0.004865	0.04449	2	2	CUBN,LRP2
GO: Biological Process	GO:0072229	metanephric proximal convoluted tubule development			0.0002335	1	0.004865	0.04449	2	2	ACAT1,AQP1
GO: Biological Process	GO:0072019	proximal convoluted tubule development			0.0002335	1	0.004865	0.04449	2	2	ACAT1,AQP1
GO: Biological Process	GO:0035846	oviduct epithelium development			0.0002335	1	0.004865	0.04449	2	2	LHX1,CDH1
GO: Biological Process	GO:0035847	uterine epithelium development			0.0002335	1	0.004865	0.04449	2	2	LHX1,CDH1
GO: Biological Process	GO:0019543	propionate catabolic process			0.0002335	1	0.004865	0.04449	2	2	PCK1,PCK2
GO: Biological Process	GO:0097089	methyl-branched fatty acid metabolic process			0.0002335	1	0.004865	0.04449	2	2	PHYH,SLC27A2
GO: Biological Process	GO:0046327	glycerol biosynthetic process from pyruvate			0.0002335	1	0.004865	0.04449	2	2	PCK1,PCK2
GO: Biological Process	GO:0030277	maintenance of gastrointestinal epithelium			0.0002546	1	0.005243	0.04794	4	21	SOX9,PBLD,RBP4,SLC22A5
GO: Biological Process	GO:0070293	renal absorption			0.0002546	1	0.005243	0.04794	4	21	KCNJ1,AQP1,AQP3,AKR1C3
GO: Biological Process	GO:0006525	arginine metabolic process			0.0002546	1	0.005243	0.04794	4	21	DDAH1,ARG2,ASS1,AGMAT
GO: Biological Process	GO:0055069	zinc ion homeostasis			0.0002603	1	0.005338	0.04881	5	38	MT1E,MT1F,MT1G,MT1H,MT1X
GO: Biological Process	GO:0006766	vitamin metabolic process			0.0002646	1	0.005406	0.04943	9	138	ACP3,ALDH1L1,AOX1,CUBN,RGN,AKR1C3,LRP2,PCCA,CYB5A
GO: Biological Process	GO:0046364	monosaccharide biosynthetic process			0.000277	1	0.005638	0.05155	8	110	PPARGC1A,ALDOB,GOT1,RBP4,RGN,G6PC,PCK1,PCK2
GO: Biological Process	GO:0042908	xenobiotic transport			0.0003075	1	0.00621	0.05678	4	22	SLC17A3,PDZK1,SLC15A2,SLC22A5
GO: Biological Process	GO:0009081	branched-chain amino acid metabolic process			0.0003075	1	0.00621	0.05678	4	22	ACADSB,ACAT1,DAO,ALDH6A1
GO: Biological Process	GO:0006813	potassium ion transport			0.0003164	1	0.006365	0.0582	13	275	PTGER3,KCNJ1,HPN,KCNJ15,KCNJ16,ANK2,ANK3,AQP1,SLC12A1,SLC12A3,ATP1A1,ATP1B1,FXYD2
GO: Biological Process	GO:0006637	acyl-CoA metabolic process			0.0003327	1	0.006643	0.06074	8	113	GLYAT,ACADSB,ACAT1,PIPOX,HMGCS2,ACSM3,ACSF2,EHHADH
GO: Biological Process	GO:0035383	thioester metabolic process			0.0003327	1	0.006643	0.06074	8	113	GLYAT,ACADSB,ACAT1,PIPOX,HMGCS2,ACSM3,ACSF2,EHHADH
GO: Biological Process	GO:0098609	cell-cell adhesion			0.0003369	1	0.006701	0.06127	28	911	CHL1,SOX9,GATA3,PERP,CLEC4M,PTGER3,MAGI2,GPC4,FGB,UMOD,PLG,CX3CL1,SDC4,RAP1GAP,DSC1,ANK3,PODXL,ANXA3,CLDN7,CLDN10,CLDN8,SLC4A1,ARG2,ASS1,TACSTD2,CDH1,CDH6,CDH16
GO: Biological Process	GO:0034762	regulation of transmembrane transport			0.0003431	1	0.006798	0.06216	22	641	ERBB3,ERBB4,PDZK1,PTGER3,ABCB1,MET,PPARGC1A,CLIC5,CLCNKB,KCNJ1,KCNJ15,KCNJ16,CX3CL1,CA2,ANK2,ANK3,ANXA3,RGN,SHANK2,SLC34A1,ATP1B1,FXYD2
GO: Biological Process	GO:0009068	aspartate family amino acid catabolic process			0.0003678	1	0.007233	0.06613	4	23	RIDA,PIPOX,GOT1,ASPA
GO: Biological Process	GO:0019400	alditol metabolic process			0.0003678	1	0.007233	0.06613	4	23	ANGPTL3,GOT1,PCK1,PCK2
GO: Biological Process	GO:0007219	Notch signaling pathway			0.0003694	1	0.007238	0.06618	11	209	SOX9,PERP,NR1H4,GOT1,TBX2,HNF1B,SORBS2,EGF,GALNT11,ELF3,CDH6
GO: Biological Process	GO:0001525	angiogenesis			0.0003733	1	0.007287	0.06663	22	645	TSPAN12,ARHGAP24,DDAH1,ADGRG1,CCN6,ANGPTL3,FGF1,FGF9,VAV3,PLG,CX3CL1,COL4A3,COL4A4,NPR1,THSD7A,ANPEP,HYAL1,ANXA3,AQP1,EFNA1,EGF,ENPEP
GO: Biological Process	GO:0048608	reproductive structure development			0.0003787	1	0.007365	0.06734	19	517	SOX9,GATA3,ADGRG1,MET,FGF9,MME,PLG,HSD17B2,HNF1B,KRT8,RBP4,REN,MAP7,LHX1,SLC22A5,AKR1C3,LRP2,CDH1,SERPINA5
GO: Biological Process	GO:0051050	positive regulation of transport			0.0003839	1	0.007425	0.06789	33	1157	PCP4,TMEM30B,ERBB3,ERBB4,PDZK1,GATA3,F2RL1,ABCB1,MAGI2,MET,CLU,FGB,CX3CL1,SDC4,NR1H4,IL17RB,CA2,NPR1,RAP1GAP,A1CF,ANK2,ANK3,RBP4,AQP1,TSPAN1,ACE2,RGN,EGF,SLC34A1,LRP2,ATP1B1,CDH1,PCK2
GO: Biological Process	GO:0032836	glomerular basement membrane development			0.0003846	1	0.007425	0.06789	3	10	NPHS1,COL4A3,COL4A4
GO: Biological Process	GO:0009725	response to hormone			0.0003932	1	0.007562	0.06915	31	1062	MAOB,ACAT1,ESRRG,GATM,PPARGC1A,KL,HPGD,HPN,ANGPTL3,FGB,NR3C2,KHK,HSD11B2,ALDOB,NR1H4,GOT1,CA2,SORBS2,ANXA3,RBP4,GRB14,REN,AQP1,CRYAB,SLC34A1,ATP6V0A4,ASS1,AKR1C3,ATP1A1,PCK1,PCK2
GO: Biological Process	GO:0007568	aging			0.0004075	1	0.00781	0.07141	15	358	DDC,PTH1R,PPARGC1A,TFCP2L1,KL,MME,CX3CL1,TBX2,NOX4,ARG2,CRYAB,MSRA,RGN,ASS1,PCK1
GO: Biological Process	GO:0006767	water-soluble vitamin metabolic process			0.0004139	1	0.007903	0.07226	7	89	ACP3,ALDH1L1,AOX1,CUBN,RGN,PCCA,CYB5A
GO: Biological Process	GO:0061458	reproductive system development			0.0004162	1	0.007919	0.07241	19	521	SOX9,GATA3,ADGRG1,MET,FGF9,MME,PLG,HSD17B2,HNF1B,KRT8,RBP4,REN,MAP7,LHX1,SLC22A5,AKR1C3,LRP2,CDH1,SERPINA5
GO: Biological Process	GO:0042417	dopamine metabolic process			0.0004198	1	0.007957	0.07276	5	42	MAOA,MAOB,DAO,DDC,NPR1
GO: Biological Process	GO:0019585	glucuronate metabolic process			0.0004361	1	0.008208	0.07505	4	24	UGT2B28,CRYL1,UGT2A3,DCXR
GO: Biological Process	GO:0006063	uronic acid metabolic process			0.0004361	1	0.008208	0.07505	4	24	UGT2B28,CRYL1,UGT2A3,DCXR
GO: Biological Process	GO:0033865	nucleoside bisphosphate metabolic process			0.0004434	1	0.008257	0.07549	9	148	GLYAT,ACADSB,ACAT1,PIPOX,HMGCS2,ACSM3,SULT1C2,ACSF2,EHHADH
GO: Biological Process	GO:0033875	ribonucleoside bisphosphate metabolic process			0.0004434	1	0.008257	0.07549	9	148	GLYAT,ACADSB,ACAT1,PIPOX,HMGCS2,ACSM3,SULT1C2,ACSF2,EHHADH
GO: Biological Process	GO:0034032	purine nucleoside bisphosphate metabolic process			0.0004434	1	0.008257	0.07549	9	148	GLYAT,ACADSB,ACAT1,PIPOX,HMGCS2,ACSM3,SULT1C2,ACSF2,EHHADH
GO: Biological Process	GO:0055086	nucleobase-containing small molecule metabolic process			0.0004521	1	0.008389	0.0767	25	789	GLYAT,CDS1,PDE1A,UPB1,ACADSB,ACAT1,ACP3,PIPOX,HMGCS2,PPARGC1A,ACSM3,SULT1C2,AK4,KHK,ALDOB,ALDH6A1,DPYS,NPR1,AOX1,ACSF2,SLC4A1,EHHADH,PDE8B,OGDHL,PCK1
GO: Biological Process	GO:2000145	regulation of cell motility			0.0004579	1	0.008467	0.07741	32	1120	SOX9,ERBB3,ERBB4,GATA3,ADGRG1,PBLD,PTGER3,F2RL1,MAGI2,DEFB1,MET,PPARGC1A,ANGPTL3,FGF1,FGF9,CX3CL1,SDC4,RAB25,PODXL,HYAL1,ANXA3,CXCL14,NOX4,CLDN7,AQP1,TFAP2A,RGN,EFNA1,EGF,MST1L,TACSTD2,CDH1
GO: Biological Process	GO:0007162	negative regulation of cell adhesion			0.0004659	1	0.008583	0.07848	14	324	ERBB3,PTGER3,PTPRO,PLG,CX3CL1,SDC4,KNG1,PODXL,CLDN7,ARG2,ASS1,MUC1,TACSTD2,CDH1
GO: Biological Process	GO:0098657	import into cell			0.0004831	1	0.008839	0.08082	28	932	CLEC4M,DNAJC6,PTGER3,F2RL1,APOM,MAGI2,CLU,KCNJ1,SBSPON,KCNJ15,KCNJ16,NR1H4,SLC27A2,GULP1,RAB17,ANK2,SH3GL2,CUBN,TSPAN1,LIPC,SLC12A1,EGF,SLC12A3,SLC34A1,LRP2,ATP1A1,ATP1B1,FXYD2
GO: Biological Process	GO:0034764	positive regulation of transmembrane transport			0.0004831	1	0.008839	0.08082	12	251	ERBB3,ERBB4,PDZK1,ABCB1,MET,CX3CL1,CA2,ANK2,ANK3,RGN,SLC34A1,ATP1B1
GO: Biological Process	GO:0060688	regulation of morphogenesis of a branching structure			0.0004941	1	0.009008	0.08237	6	66	SOX9,MET,HNF1B,LHX1,TACSTD2,CDH1
GO: Biological Process	GO:0006641	triglyceride metabolic process			0.0004987	1	0.009061	0.08285	8	120	FABP1,ANGPTL3,RGN,LIPC,MTTP,G6PC,PCK1,PCK2
GO: Biological Process	GO:2000027	regulation of animal organ morphogenesis			0.000507	1	0.00918	0.08393	13	289	SOX9,GATA3,MAGI2,MET,HPN,GPC4,FGF1,TBX2,HNF1B,TFAP2A,LHX1,TACSTD2,CDH1
GO: Biological Process	GO:0009713	catechol-containing compound biosynthetic process			0.000513	1	0.009194	0.08406	4	25	GATA3,DAO,DDC,KL
GO: Biological Process	GO:0042423	catecholamine biosynthetic process			0.000513	1	0.009194	0.08406	4	25	GATA3,DAO,DDC,KL
GO: Biological Process	GO:0090189	regulation of branching involved in ureteric bud morphogenesis			0.000513	1	0.009194	0.08406	4	25	SOX9,HNF1B,LHX1,TACSTD2
GO: Biological Process	GO:0098801	regulation of renal system process			0.0005228	1	0.009214	0.08425	5	44	PTGER3,F2RL1,PTPRO,NPR1,ANPEP
GO: Biological Process	GO:0097178	ruffle assembly			0.0005228	1	0.009214	0.08425	5	44	ARHGAP24,SH3YL1,COBL,EPS8L2,TACSTD2
GO: Biological Process	GO:0072348	sulfur compound transport			0.0005228	1	0.009214	0.08425	5	44	SLC26A4,SLC44A4,SLC3A1,SLC7A9,SLC13A1
GO: Biological Process	GO:0006107	oxaloacetate metabolic process			0.0005229	1	0.009214	0.08425	3	11	GOT1,PCK1,PCK2
GO: Biological Process	GO:0046113	nucleobase catabolic process			0.0005229	1	0.009214	0.08425	3	11	ALDH6A1,DPYS,AOX1
GO: Biological Process	GO:0007417	central nervous system development			0.0005249	1	0.009218	0.08429	32	1129	SOX9,RIDA,ERBB4,MAL,MAOB,ACAT1,ADGRG1,MECOM,PTGER3,CA10,ABCB1,MET,PPARGC1A,SERPINI1,CLU,AK4,FGF9,FGFR3,TBX2,HNF1B,ANXA3,SH3GL2,CRTAC1,AQP1,TFAP2A,LHX1,SHANK2,EGF,ASPA,LRP2,EMX2,CDH1
GO: Biological Process	GO:0048592	eye morphogenesis			0.0005277	1	0.009237	0.08445	10	184	TSPAN12,SOX9,FGFR3,TBX2,CALB1,RBP4,AQP1,TFAP2A,TFAP2B,LHX1
GO: Biological Process	GO:0040007	growth			0.0005494	1	0.009584	0.08763	33	1181	SOX9,ERBB4,AZGP1,GATA3,MAGI2,TFCP2L1,HPN,FGF1,COBL,FGF9,FGFR3,PLG,PLS1,IL17RB,TBX2,HNF1B,NPR1,NPY1R,SORBS2,HYAL1,SH3GL2,RBP4,MAP7,SLC44A4,CRYAB,LHX1,MT1E,MT1F,MT1G,MT1H,MT1X,SHANK2,G6PC
GO: Biological Process	GO:2000379	positive regulation of reactive oxygen species metabolic process			0.0005568	1	0.009679	0.0885	8	122	DDAH1,F2RL1,CLU,NOX4,ACE2,RGN,ASS1,AKR1C3
GO: Biological Process	GO:0098742	cell-cell adhesion via plasma-membrane adhesion molecules			0.0005585	1	0.009679	0.0885	13	292	CHL1,MAGI2,GPC4,UMOD,CX3CL1,DSC1,ANXA3,CLDN7,CLDN10,CLDN8,CDH1,CDH6,CDH16
GO: Biological Process	GO:0001568	blood vessel development			0.0005799	1	0.01002	0.09159	26	849	TSPAN12,ARHGAP24,DDAH1,ADGRG1,CCN6,HPGD,ANGPTL3,FGF1,FGF9,VAV3,PLG,CX3CL1,TBX2,COL4A3,COL4A4,NPR1,THSD7A,ANPEP,HYAL1,ANXA3,AQP1,TFAP2B,EFNA1,EGF,LRP2,ENPEP
GO: Biological Process	GO:0006091	generation of precursor metabolites and energy			0.0005987	1	0.01025	0.09369	20	580	MAOB,ACADSB,ACAT1,HMGCS2,ADH6,TYRP1,PPARGC1A,KL,GLDC,AK4,KHK,ALDOB,AOX1,NOX4,SLC4A1,PPP1R1A,AKR7A3,OGDHL,G6PC,CYB5A
GO: Biological Process	GO:0060065	uterus development			0.0005991	1	0.01025	0.09369	4	26	GATA3,RBP4,LHX1,CDH1
GO: Biological Process	GO:0016338	calcium-independent cell-cell adhesion via plasma membrane cell-adhesion molecules			0.0005991	1	0.01025	0.09369	4	26	CX3CL1,CLDN7,CLDN10,CLDN8
GO: Biological Process	GO:0051259	protein complex oligomerization			0.0006089	1	0.01038	0.09492	22	669	UPB1,ACADL,LZTS3,ACAT1,ACP3,MAGI2,NELL1,SLC22A6,TRPM3,CLU,DPYS,GPX3,CLDN7,CUBN,SLC4A1,CRYAB,CRYZ,LIPC,SLC34A1,CDH1,HAO2,DCXR
GO: Biological Process	GO:0071495	cellular response to endogenous stimulus			0.0006144	1	0.01044	0.09546	40	1541	SOX9,ERBB4,AOC1,GALNT3,ESRRG,GATA3,PBLD,DDC,MAGI2,PPARGC1A,KL,HPGD,FGB,FGF1,FGF9,NR3C2,FGFR3,NR1H4,GOT1,CA2,RAP1GAP,SORBS2,HYAL1,SH3GL2,GRB14,SOSTDC1,NOX4,REN,AQP1,TFAP2B,LHX1,SLC34A1,ATP6V0A4,ASS1,AKR1C3,LRP2,ATP1A1,CDH1,PCK1,PCK2
GO: Biological Process	GO:0072507	divalent inorganic cation homeostasis			0.000666	1	0.01117	0.1022	20	585	EPHX2,PTGER3,F2RL1,PTH1R,KL,CX3CL1,KNG1,GOT1,NPY1R,CALB1,ANK2,ANK3,TFAP2B,MT1E,MT1F,MT1G,MT1H,RGN,MT1X,ATP1B1
GO: Biological Process	GO:0008584	male gonad development			0.0006799	1	0.01117	0.1022	9	157	SOX9,GATA3,ADGRG1,FGF9,RBP4,REN,MAP7,AKR1C3,LRP2
GO: Biological Process	GO:0072237	metanephric proximal tubule development			0.0006829	1	0.01117	0.1022	2	3	ACAT1,AQP1
GO: Biological Process	GO:0006579	amino-acid betaine catabolic process			0.0006829	1	0.01117	0.1022	2	3	ACADL,BHMT
GO: Biological Process	GO:0019859	thymine metabolic process			0.0006829	1	0.01117	0.1022	2	3	ALDH6A1,DPYS
GO: Biological Process	GO:0006210	thymine catabolic process			0.0006829	1	0.01117	0.1022	2	3	ALDH6A1,DPYS
GO: Biological Process	GO:2000611	positive regulation of thyroid hormone generation			0.0006829	1	0.01117	0.1022	2	3	GATA3,HPN
GO: Biological Process	GO:1904640	response to methionine			0.0006829	1	0.01117	0.1022	2	3	PPARGC1A,PCK1
GO: Biological Process	GO:0061625	glycolytic process through fructose-1-phosphate			0.0006829	1	0.01117	0.1022	2	3	KHK,ALDOB
GO: Biological Process	GO:0006805	xenobiotic metabolic process			0.0006894	1	0.01117	0.1022	8	126	EPHX2,GLYAT,AOC1,CYP3A5,UGT2B28,FMO1,CRYZ,AKR7A3
GO: Biological Process	GO:0072178	nephric duct morphogenesis			0.0006894	1	0.01117	0.1022	3	12	GATA3,HNF1B,LHX1
GO: Biological Process	GO:0006570	tyrosine metabolic process			0.0006894	1	0.01117	0.1022	3	12	HGD,TYRP1,HPD
GO: Biological Process	GO:0072017	distal tubule development			0.0006894	1	0.01117	0.1022	3	12	UMOD,CALB1,TFAP2B
GO: Biological Process	GO:0060068	vagina development			0.0006894	1	0.01117	0.1022	3	12	RBP4,LHX1,LRP2
GO: Biological Process	GO:0032463	negative regulation of protein homooligomerization			0.0006894	1	0.01117	0.1022	3	12	CLU,CLDN7,CRYAB
GO: Biological Process	GO:0046546	development of primary male sexual characteristics			0.0007116	1	0.0115	0.1051	9	158	SOX9,GATA3,ADGRG1,FGF9,RBP4,REN,MAP7,AKR1C3,LRP2
GO: Biological Process	GO:0050821	protein stabilization			0.0007342	1	0.01183	0.1081	10	192	PPARGC1A,CLU,AFM,A1CF,ANK2,TSPAN1,CRYAB,GBA3,EFNA1,ATP1B1
GO: Biological Process	GO:0040012	regulation of locomotion			0.0007538	1	0.0121	0.1107	33	1203	SOX9,ERBB3,ERBB4,GATA3,ADGRG1,PBLD,PTGER3,F2RL1,MAGI2,DEFB1,MET,PPARGC1A,PTPRO,ANGPTL3,FGF1,FGF9,CX3CL1,SDC4,RAB25,PODXL,HYAL1,ANXA3,CXCL14,NOX4,CLDN7,AQP1,TFAP2A,RGN,EFNA1,EGF,MST1L,TACSTD2,CDH1
GO: Biological Process	GO:0010951	negative regulation of endopeptidase activity			0.0007795	1	0.01248	0.1141	12	265	CRIM1,SPINK1,FABP1,SERPINI1,KNG1,COL4A3,SERPINA6,AQP1,TFAP2B,CRYAB,SLPI,SERPINA5
GO: Biological Process	GO:0050435	amyloid-beta metabolic process			0.0007845	1	0.01249	0.1142	5	48	CLU,MME,NAT8B,REN,EFNA1
GO: Biological Process	GO:0006094	gluconeogenesis			0.0007863	1	0.01249	0.1142	7	99	PPARGC1A,ALDOB,GOT1,RBP4,G6PC,PCK1,PCK2
GO: Biological Process	GO:0003407	neural retina development			0.0007875	1	0.01249	0.1142	6	72	TSPAN12,SOX9,CALB1,TFAP2A,TFAP2B,LHX1
GO: Biological Process	GO:0051674	localization of cell			0.0008235	1	0.01299	0.1187	47	1932	CHL1,SOX9,ERBB3,ERBB4,ARHGAP24,GATA3,ADGRG1,PBLD,PTGER3,F2RL1,S100A2,MAGI2,DEFB1,MET,PPARGC1A,PTPRO,GPC4,ANGPTL3,FGF1,UMOD,FGF9,VAV3,PLG,CX3CL1,SDC4,RAB25,PODXL,HYAL1,ANXA3,GRB14,CXCL14,NOX4,CLDN7,AQP1,TFAP2A,TSPAN1,SLC7A9,LHX1,RGN,EFNA1,EGF,MST1L,ATP1B1,EMX2,TACSTD2,CDH1,ENPEP
GO: Biological Process	GO:0048870	cell motility			0.0008235	1	0.01299	0.1187	47	1932	CHL1,SOX9,ERBB3,ERBB4,ARHGAP24,GATA3,ADGRG1,PBLD,PTGER3,F2RL1,S100A2,MAGI2,DEFB1,MET,PPARGC1A,PTPRO,GPC4,ANGPTL3,FGF1,UMOD,FGF9,VAV3,PLG,CX3CL1,SDC4,RAB25,PODXL,HYAL1,ANXA3,GRB14,CXCL14,NOX4,CLDN7,AQP1,TFAP2A,TSPAN1,SLC7A9,LHX1,RGN,EFNA1,EGF,MST1L,ATP1B1,EMX2,TACSTD2,CDH1,ENPEP
GO: Biological Process	GO:0002009	morphogenesis of an epithelium			0.0008465	1	0.01328	0.1214	21	641	SOX9,ARHGAP24,GATA3,MAGI2,MET,GPC4,FGF1,COBL,FGFR3,SDC4,CA2,TBX2,HNF1B,PODXL,SOSTDC1,TFAP2A,LHX1,EGF,LRP2,TACSTD2,CDH1
GO: Biological Process	GO:1903779	regulation of cardiac conduction			0.0008473	1	0.01328	0.1214	6	73	NPR1,ANK2,ACE2,ATP1A1,ATP1B1,FXYD2
GO: Biological Process	GO:0043062	extracellular structure organization			0.0008561	1	0.01338	0.1223	18	510	SOX9,APOM,OLFML2A,HPN,FGB,PLG,SDC4,NR1H4,NPHS1,COL4A3,COL4A4,HYAL1,CUBN,TFAP2A,LIPC,MTTP,ELF3,CDH1
GO: Biological Process	GO:0046189	phenol-containing compound biosynthetic process			0.000863	1	0.01345	0.1229	5	49	GATA3,DAO,DDC,TYRP1,KL
GO: Biological Process	GO:0001101	response to acid chemical			0.0008829	1	0.01348	0.1233	15	386	SOX9,PPARGC1A,SLC22A6,GLDC,HSD17B2,NR1H4,KRT8,RBP4,MAP7,AQP1,AQP3,ASS1,AKR1C3,CDH1,PCK1
GO: Biological Process	GO:0046689	response to mercury ion			0.0008862	1	0.01348	0.1233	3	13	GATM,AQP1,SLC34A1
GO: Biological Process	GO:0070493	thrombin-activated receptor signaling pathway			0.0008862	1	0.01348	0.1233	3	13	F2RL1,MET,HPGD
GO: Biological Process	GO:0071472	cellular response to salt stress			0.0008862	1	0.01348	0.1233	3	13	AQP1,SLC12A1,EFHD1
GO: Biological Process	GO:0046415	urate metabolic process			0.0008862	1	0.01348	0.1233	3	13	SLC17A3,SLC17A1,G6PC
GO: Biological Process	GO:1902224	ketone body metabolic process			0.0008862	1	0.01348	0.1233	3	13	ACAT1,HMGCS2,TYRP1
GO: Biological Process	GO:1904468	negative regulation of tumor necrosis factor secretion			0.0008862	1	0.01348	0.1233	3	13	CX3CL1,NR1H4,ARG2
GO: Biological Process	GO:0032351	negative regulation of hormone metabolic process			0.0008862	1	0.01348	0.1233	3	13	PDE8B,AKR1C3,ATP1A1
GO: Biological Process	GO:0030879	mammary gland development			0.0008885	1	0.01348	0.1233	9	163	SOX9,ERBB4,GATA3,IRF6,TBX2,SOSTDC1,EGF,ELF3,MST1L
GO: Biological Process	GO:2000147	positive regulation of cell motility			0.0008977	1	0.01358	0.1242	21	644	SOX9,ERBB4,GATA3,PTGER3,F2RL1,DEFB1,MET,ANGPTL3,FGF1,FGF9,CX3CL1,RAB25,PODXL,HYAL1,ANXA3,CXCL14,NOX4,CLDN7,AQP1,TFAP2A,EGF
GO: Biological Process	GO:0014070	response to organic cyclic compound			0.0009066	1	0.01368	0.1251	30	1068	AOC1,MAOB,ACAT1,ESRRG,PTGER3,PPARGC1A,SLC22A6,CLU,GLDC,HPGD,NR3C2,HSD11B2,NR1H4,GOT1,CA2,HNF1B,ANXA3,NOX4,REN,AQP1,AQP3,CRYAB,SLC34A1,ASS1,AKR1C3,ATP1A1,CDH1,GRAMD1C,PCK1,PCK2
GO: Biological Process	GO:0060675	ureteric bud morphogenesis			0.0009104	1	0.0137	0.1253	6	74	SOX9,GATA3,FGF1,HNF1B,LHX1,TACSTD2
GO: Biological Process	GO:0010669	epithelial structure maintenance			0.0009183	1	0.01374	0.1256	4	29	SOX9,PBLD,RBP4,SLC22A5
GO: Biological Process	GO:0003071	renal system process involved in regulation of systemic arterial blood pressure			0.0009183	1	0.01374	0.1256	4	29	F2RL1,PTPRO,HSD11B2,REN
GO: Biological Process	GO:0032940	secretion by cell			0.0009653	1	0.0144	0.1317	42	1682	PCP4,GAD1,AOC1,MAOB,ACP3,GATA3,PTGER3,F2RL1,CLU,FGB,NR3C2,MME,PLG,CX3CL1,SDC4,KNG1,NR1H4,IL17RB,SLC27A2,HNF1B,A1CF,NPY1R,RAB25,DSC1,ANPEP,ANXA3,RBP4,REN,SLC44A4,AQP1,TFAP2B,SLC2A2,ARG2,FRK,EGF,SLCO4C1,PDE8B,SLC22A2,SLPI,MTTP,LRP2,PCK2
GO: Biological Process	GO:0008203	cholesterol metabolic process			0.0009686	1	0.01441	0.1317	9	165	EPHX2,ACADL,HMGCS2,ANGPTL3,FGF1,NR1H4,CUBN,LIPC,MTTP
GO: Biological Process	GO:0072171	mesonephric tubule morphogenesis			0.0009772	1	0.01447	0.1323	6	75	SOX9,GATA3,FGF1,HNF1B,LHX1,TACSTD2
GO: Biological Process	GO:0016051	carbohydrate biosynthetic process			0.0009782	1	0.01447	0.1323	11	235	IMPA2,PTH1R,PPARGC1A,ALDOB,GOT1,RBP4,RGN,EGF,G6PC,PCK1,PCK2
GO: Biological Process	GO:0051094	positive regulation of developmental process			0.0009914	1	0.01462	0.1337	41	1632	PCP4,SOX9,ERBB3,ERBB4,DDAH1,GATA3,NAP1L2,MECOM,MAGI2,MET,NELL1,PPARGC1A,KL,SERPINI1,CLU,HPN,ANGPTL3,FGB,FGF1,COBL,FGF9,FGFR3,MME,ADIRF,CX3CL1,PLS1,NR1H4,CA2,TBX2,HYAL1,ANXA3,AQP1,TFAP2A,ARG2,LHX1,SHANK2,EGF,ASPA,LRP2,MST1L,TACSTD2
GO: Biological Process	GO:0019319	hexose biosynthetic process			0.0009941	1	0.01462	0.1337	7	103	PPARGC1A,ALDOB,GOT1,RBP4,G6PC,PCK1,PCK2
GO: Biological Process	GO:0007167	enzyme linked receptor protein signaling pathway			0.001001	1	0.01469	0.1343	31	1124	SOX9,ERBB3,ERBB4,GALNT3,CRIM1,GATA3,PBLD,MAGI2,MET,KL,HPGD,HPN,FGF1,FGF9,VAV3,FGFR3,NR1H4,GOT1,COL4A3,NPR1,SH3GL2,TOM1L1,GRB14,SOSTDC1,TFAP2A,TFAP2B,FRK,EFNA1,EGF,ATP6V0A4,LRP2
GO: Biological Process	GO:0009743	response to carbohydrate			0.001008	1	0.01471	0.1345	12	273	APOM,PPARGC1A,KHK,NR1H4,GOT1,COL4A3,HNF1B,NOX4,SLC2A2,PDE8B,PCK1,PCK2
GO: Biological Process	GO:0019318	hexose metabolic process			0.001008	1	0.01471	0.1345	12	273	PPARGC1A,KHK,ALDOB,GOT1,NPY1R,RBP4,TFAP2B,RGN,G6PC,DCXR,PCK1,PCK2
GO: Biological Process	GO:0046486	glycerolipid metabolic process			0.001019	1	0.01482	0.1355	17	475	CDS1,IMPA2,FABP1,SH3YL1,ANGPTL3,PIP5K1B,VAV3,FGFR3,NR1H4,CWH43,SLC44A4,RGN,LIPC,MTTP,G6PC,PCK1,PCK2
GO: Biological Process	GO:0001944	vasculature development			0.001043	1	0.01513	0.1383	26	884	TSPAN12,ARHGAP24,DDAH1,ADGRG1,CCN6,HPGD,ANGPTL3,FGF1,FGF9,VAV3,PLG,CX3CL1,TBX2,COL4A3,COL4A4,NPR1,THSD7A,ANPEP,HYAL1,ANXA3,AQP1,TFAP2B,EFNA1,EGF,LRP2,ENPEP
GO: Biological Process	GO:0006635	fatty acid beta-oxidation			0.001048	1	0.01515	0.1386	6	76	ACADL,ACAT1,ACOX2,FABP1,SLC27A2,EHHADH
GO: Biological Process	GO:0015697	quaternary ammonium group transport			0.001115	1	0.01596	0.1459	3	14	PDZK1,SLC22A2,SLC22A5
GO: Biological Process	GO:0009437	carnitine metabolic process			0.001115	1	0.01596	0.1459	3	14	ACADL,BBOX1,SLC22A5
GO: Biological Process	GO:0032530	regulation of microvillus organization			0.001115	1	0.01596	0.1459	3	14	PLS1,RAP1GAP,PODXL
GO: Biological Process	GO:2001223	negative regulation of neuron migration			0.001115	1	0.01596	0.1459	3	14	ERBB4,ADGRG1,CX3CL1
GO: Biological Process	GO:0070848	response to growth factor			0.001123	1	0.01603	0.1465	24	794	SOX9,ERBB4,GALNT3,GATA3,PBLD,DDC,MAGI2,PPARGC1A,KL,HPGD,FGF1,FGF9,FGFR3,GOT1,RAP1GAP,HYAL1,ANXA3,SH3GL2,SOSTDC1,NOX4,TFAP2B,LHX1,MT1G,LRP2
GO: Biological Process	GO:0015696	ammonium transport			0.001134	1	0.0161	0.1472	8	136	PCP4,MAOB,PDZK1,RHCG,SLC44A4,AQP1,SLC22A2,SLC22A5
GO: Biological Process	GO:0019751	polyol metabolic process			0.001134	1	0.0161	0.1472	8	136	IMPA2,PTH1R,ANGPTL3,PLCL1,GOT1,SLC34A1,PCK1,PCK2
GO: Biological Process	GO:0010466	negative regulation of peptidase activity			0.001142	1	0.01617	0.1478	12	277	CRIM1,SPINK1,FABP1,SERPINI1,KNG1,COL4A3,SERPINA6,AQP1,TFAP2B,CRYAB,SLPI,SERPINA5
GO: Biological Process	GO:0060562	epithelial tube morphogenesis			0.001169	1	0.0165	0.1509	15	397	SOX9,GATA3,MET,FGF1,COBL,SDC4,TBX2,HNF1B,PODXL,SOSTDC1,TFAP2A,LHX1,EGF,LRP2,TACSTD2
GO: Biological Process	GO:0006875	cellular metal ion homeostasis			0.001173	1	0.01652	0.151	21	658	EPHX2,PTGER3,F2RL1,PTH1R,NR3C2,CX3CL1,KNG1,GOT1,NPY1R,CALB1,ANK2,CUBN,MT1E,MT1F,MT1G,MT1H,RGN,MT1X,LRP2,ATP1A1,ATP1B1
GO: Biological Process	GO:0060993	kidney morphogenesis			0.001177	1	0.01652	0.151	7	106	SOX9,GATA3,FGF1,HNF1B,CALB1,LHX1,TACSTD2
GO: Biological Process	GO:0016477	cell migration			0.001244	1	0.01738	0.1589	43	1757	CHL1,SOX9,ERBB4,ARHGAP24,GATA3,ADGRG1,PBLD,PTGER3,F2RL1,S100A2,MAGI2,MET,PPARGC1A,PTPRO,GPC4,ANGPTL3,FGF1,UMOD,FGF9,VAV3,PLG,CX3CL1,SDC4,RAB25,PODXL,HYAL1,ANXA3,GRB14,CXCL14,NOX4,AQP1,TFAP2A,TSPAN1,SLC7A9,LHX1,EFNA1,EGF,MST1L,ATP1B1,EMX2,TACSTD2,CDH1,ENPEP
GO: Biological Process	GO:0007605	sensory perception of sound			0.001245	1	0.01738	0.1589	9	171	SLC26A4,CLIC5,HPN,COL4A3,EPS8L2,TFAP2A,ATP6V0A4,LRP2,CDH1
GO: Biological Process	GO:0043067	regulation of programmed cell death			0.001257	1	0.01751	0.1601	44	1811	CHL1,PCP4,SOX9,PDE1A,ERBB3,ERBB4,MAL,GATA3,PERP,MECOM,FABP1,MET,NELL1,PPARGC1A,CLU,KCNJ1,HPGD,HPN,TOX3,RETREG1,FGB,VAV3,FGFR3,CX3CL1,KNG1,NR1H4,COL4A3,NAT8B,HNF1B,ANK2,NOX4,CLDN7,AQP1,TFAP2A,TFAP2B,ARG2,CRYAB,RGN,EFNA1,AKR1C3,FOLH1B,MUC1,CDH1,TPD52L1
GO: Biological Process	GO:0098662	inorganic cation transmembrane transport			0.001269	1	0.01763	0.1612	28	993	SLC17A3,PTGER3,TRPM3,KCNJ1,HPN,KCNJ15,KCNJ16,AK4,SLC5A12,CX3CL1,ANK2,ANK3,SLC13A3,AQP1,SLC6A13,RGN,SLC10A2,SLC12A1,SLC12A3,SLC13A1,SLC15A2,SLC34A1,ATP6V0A4,ATP1A1,SLC4A4,ATP1B1,FXYD2,CYB5A
GO: Biological Process	GO:0009410	response to xenobiotic stimulus			0.001292	1	0.0179	0.1637	13	320	EPHX2,GLYAT,AOC1,CYP3A5,PPARGC1A,UGT2B28,FMO1,AQP1,CRYZ,ASS1,AKR7A3,PCK1,PCK2
GO: Biological Process	GO:0051289	protein homotetramerization			0.001312	1	0.01813	0.1658	7	108	UPB1,ACADL,ACP3,DPYS,GPX3,CRYZ,DCXR
GO: Biological Process	GO:0042573	retinoic acid metabolic process			0.001341	1	0.01839	0.1682	4	32	CYP3A5,ALDH8A1,ADH6,AKR1C3
GO: Biological Process	GO:0035461	vitamin transmembrane transport			0.001341	1	0.01839	0.1682	4	32	RBP4,SLC44A4,SLC2A2,LRP2
GO: Biological Process	GO:0006533	aspartate catabolic process			0.001352	1	0.01839	0.1682	2	4	GOT1,ASPA
GO: Biological Process	GO:0006562	proline catabolic process			0.001352	1	0.01839	0.1682	2	4	DAO,PRODH2
GO: Biological Process	GO:0060066	oviduct development			0.001352	1	0.01839	0.1682	2	4	LHX1,CDH1
GO: Biological Process	GO:0015811	L-cystine transport			0.001352	1	0.01839	0.1682	2	4	SLC3A1,SLC7A9
GO: Biological Process	GO:0036376	sodium ion export across plasma membrane			0.001378	1	0.01861	0.1701	3	15	ATP1A1,ATP1B1,FXYD2
GO: Biological Process	GO:0019627	urea metabolic process			0.001378	1	0.01861	0.1701	3	15	NR1H4,ARG2,ASS1
GO: Biological Process	GO:0042574	retinal metabolic process			0.001378	1	0.01861	0.1701	3	15	ALDH8A1,RBP4,AKR1C3
GO: Biological Process	GO:0006885	regulation of pH			0.001384	1	0.01864	0.1704	7	109	SLC26A4,CA2,RHCG,CA12,SLC4A1,ATP6V0A4,SLC4A4
GO: Biological Process	GO:0051272	positive regulation of cellular component movement			0.001412	1	0.01897	0.1734	21	668	SOX9,ERBB4,GATA3,PTGER3,F2RL1,DEFB1,MET,ANGPTL3,FGF1,FGF9,CX3CL1,RAB25,PODXL,HYAL1,ANXA3,CXCL14,NOX4,CLDN7,AQP1,TFAP2A,EGF
GO: Biological Process	GO:0071363	cellular response to growth factor stimulus			0.001471	1	0.0197	0.1801	23	763	SOX9,ERBB4,GALNT3,GATA3,PBLD,DDC,MAGI2,PPARGC1A,KL,HPGD,FGF1,FGF9,FGFR3,GOT1,RAP1GAP,HYAL1,SH3GL2,SOSTDC1,NOX4,TFAP2B,LHX1,MT1G,LRP2
GO: Biological Process	GO:0048545	response to steroid hormone			0.001494	1	0.01996	0.1825	15	407	MAOB,ESRRG,PPARGC1A,NR3C2,HSD11B2,NR1H4,GOT1,CA2,ANXA3,AQP1,ASS1,AKR1C3,ATP1A1,PCK1,PCK2
GO: Biological Process	GO:0035066	positive regulation of histone acetylation			0.001508	1	0.0201	0.1838	4	33	GATA3,NAP1L2,PPARGC1A,MUC1
GO: Biological Process	GO:0097327	response to antineoplastic agent			0.001538	1	0.02045	0.1869	7	111	SLC22A6,ADIRF,AQP1,ASS1,CDH1,PCK1,PCK2
GO: Biological Process	GO:0007169	transmembrane receptor protein tyrosine kinase signaling pathway			0.001573	1	0.02086	0.1907	23	767	SOX9,ERBB3,ERBB4,GALNT3,CRIM1,GATA3,MET,KL,HPN,FGF1,FGF9,VAV3,FGFR3,NR1H4,COL4A3,SH3GL2,TOM1L1,GRB14,TFAP2A,FRK,EFNA1,EGF,ATP6V0A4
GO: Biological Process	GO:0030195	negative regulation of blood coagulation			0.001586	1	0.02091	0.1912	5	56	PTGER3,FGB,PLG,KNG1,TSPAN8
GO: Biological Process	GO:0034765	regulation of ion transmembrane transport			0.001589	1	0.02091	0.1912	18	539	PDZK1,PTGER3,ABCB1,PPARGC1A,CLIC5,CLCNKB,KCNJ1,KCNJ15,KCNJ16,CX3CL1,ANK2,ANK3,ANXA3,RGN,SHANK2,SLC34A1,ATP1B1,FXYD2
GO: Biological Process	GO:0033002	muscle cell proliferation			0.001589	1	0.02091	0.1912	12	288	PDE1A,ERBB4,PPARGC1A,HPGD,FGF1,FGF9,CX3CL1,TBX2,NPR1,NPR3,RBP4,ACE2
GO: Biological Process	GO:0072078	nephron tubule morphogenesis			0.001656	1	0.0217	0.1984	6	83	SOX9,GATA3,FGF1,HNF1B,LHX1,TACSTD2
GO: Biological Process	GO:0040017	positive regulation of locomotion			0.001662	1	0.0217	0.1984	21	677	SOX9,ERBB4,GATA3,PTGER3,F2RL1,DEFB1,MET,ANGPTL3,FGF1,FGF9,CX3CL1,RAB25,PODXL,HYAL1,ANXA3,CXCL14,NOX4,CLDN7,AQP1,TFAP2A,EGF
GO: Biological Process	GO:0072176	nephric duct development			0.001678	1	0.0217	0.1984	3	16	GATA3,HNF1B,LHX1
GO: Biological Process	GO:0016114	terpenoid biosynthetic process			0.001678	1	0.0217	0.1984	3	16	ALDH8A1,HMGCS2,AKR1C3
GO: Biological Process	GO:0071474	cellular hyperosmotic response			0.001678	1	0.0217	0.1984	3	16	AQP1,SLC12A1,EFHD1
GO: Biological Process	GO:0006555	methionine metabolic process			0.001678	1	0.0217	0.1984	3	16	BHMT,BHMT2,MSRA
GO: Biological Process	GO:0071941	nitrogen cycle metabolic process			0.001678	1	0.0217	0.1984	3	16	NR1H4,ARG2,ASS1
GO: Biological Process	GO:0044062	regulation of excretion			0.001689	1	0.02174	0.1988	4	34	PTGER3,NPHS1,NPR1,ANPEP
GO: Biological Process	GO:0016486	peptide hormone processing			0.001689	1	0.02174	0.1988	4	34	MME,REN,ACE2,ENPEP
GO: Biological Process	GO:0006639	acylglycerol metabolic process			0.001708	1	0.02182	0.1995	8	145	FABP1,ANGPTL3,RGN,LIPC,MTTP,G6PC,PCK1,PCK2
GO: Biological Process	GO:0019218	regulation of steroid metabolic process			0.001708	1	0.02182	0.1995	8	145	EPHX2,ACADL,PPARGC1A,FGF1,NR1H4,PDE8B,AKR1C3,ATP1A1
GO: Biological Process	GO:0035148	tube formation			0.001708	1	0.02182	0.1995	9	179	SOX9,GATA3,COBL,SDC4,HNF1B,PODXL,TFAP2A,LRP2,CDH1
GO: Biological Process	GO:0031529	ruffle organization			0.001717	1	0.02182	0.1995	5	57	ARHGAP24,SH3YL1,COBL,EPS8L2,TACSTD2
GO: Biological Process	GO:1900047	negative regulation of hemostasis			0.001717	1	0.02182	0.1995	5	57	PTGER3,FGB,PLG,KNG1,TSPAN8
GO: Biological Process	GO:0007423	sensory organ development			0.00172	1	0.02182	0.1995	20	633	TSPAN12,SOX9,GATA3,CLIC5,HPN,PVALB,FGF9,FGFR3,SDC4,TBX2,CALB1,RBP4,CXCL14,SLC44A4,AQP1,TFAP2A,TFAP2B,CRYAB,LHX1,CDH1
GO: Biological Process	GO:0046173	polyol biosynthetic process			0.001761	1	0.02224	0.2034	6	84	IMPA2,PTH1R,PLCL1,GOT1,PCK1,PCK2
GO: Biological Process	GO:0050673	epithelial cell proliferation			0.001762	1	0.02224	0.2034	17	500	SOX9,RIDA,ERBB4,GATA3,IRF6,PBLD,HPN,FGF1,FGF9,FGFR3,HNF1B,RAP1GAP,HYAL1,RGN,MST1L,TACSTD2,CDH1
GO: Biological Process	GO:0044057	regulation of system process			0.001768	1	0.02227	0.2036	22	727	ACP3,PTGER3,F2RL1,PPARGC1A,PTPRO,FGB,CX3CL1,TBX2,NPHS1,NPR1,NPY1R,ANK2,ANPEP,REN,AQP1,ARG2,ACE2,SHANK2,SLC22A5,ATP1A1,ATP1B1,FXYD2
GO: Biological Process	GO:0031960	response to corticosteroid			0.001774	1	0.02229	0.2038	9	180	MAOB,HSD11B2,GOT1,ANXA3,AQP1,ASS1,AKR1C3,PCK1,PCK2
GO: Biological Process	GO:0006638	neutral lipid metabolic process			0.001783	1	0.02235	0.2044	8	146	FABP1,ANGPTL3,RGN,LIPC,MTTP,G6PC,PCK1,PCK2
GO: Biological Process	GO:0016125	sterol metabolic process			0.001843	1	0.02302	0.2105	9	181	EPHX2,ACADL,HMGCS2,ANGPTL3,FGF1,NR1H4,CUBN,LIPC,MTTP
GO: Biological Process	GO:0003018	vascular process in circulatory system			0.001846	1	0.02302	0.2105	10	217	EPHX2,DDAH1,PTGER3,F2RL1,FGB,CX3CL1,KNG1,NPR1,NPY1R,ACE2
GO: Biological Process	GO:1903409	reactive oxygen species biosynthetic process			0.001862	1	0.02312	0.2114	8	147	DDAH1,MAOB,CCN6,CLU,NOX4,ARG2,RGN,ASS1
GO: Biological Process	GO:0072088	nephron epithelium morphogenesis			0.001871	1	0.02312	0.2114	6	85	SOX9,GATA3,FGF1,HNF1B,LHX1,TACSTD2
GO: Biological Process	GO:0030193	regulation of blood coagulation			0.001871	1	0.02312	0.2114	6	85	PTGER3,F2RL1,FGB,PLG,KNG1,TSPAN8
GO: Biological Process	GO:0006855	drug transmembrane transport			0.001871	1	0.02312	0.2114	6	85	RBP4,SLC13A3,AQP1,SLC13A1,SLC22A2,LRP2
GO: Biological Process	GO:0003401	axis elongation			0.001885	1	0.02317	0.2119	4	35	SOX9,MAGI2,FGF1,HNF1B
GO: Biological Process	GO:0046677	response to antibiotic			0.001888	1	0.02317	0.2119	14	375	AOC1,MAOB,GATA3,PTGER3,FABP1,ADH6,MET,CLU,HPGD,HYAL1,RBP4,AQP1,SLC4A1,CRYAB
GO: Biological Process	GO:0048562	embryonic organ morphogenesis			0.001889	1	0.02317	0.2119	13	334	SOX9,GATA3,CLIC5,HPN,FGF9,TBX2,HNF1B,HYAL1,RBP4,SLC44A4,TFAP2A,LHX1,EFNA1
GO: Biological Process	GO:0043524	negative regulation of neuron apoptotic process			0.001914	1	0.02337	0.2137	9	182	CHL1,PCP4,ERBB3,PPARGC1A,TOX3,RETREG1,CX3CL1,TFAP2A,TFAP2B
GO: Biological Process	GO:0043069	negative regulation of programmed cell death			0.001914	1	0.02337	0.2137	29	1071	CHL1,PCP4,SOX9,ERBB3,ERBB4,GATA3,MECOM,FABP1,MET,PPARGC1A,CLU,KCNJ1,HPN,TOX3,RETREG1,FGB,CX3CL1,NR1H4,NAT8B,HNF1B,CLDN7,AQP1,TFAP2A,TFAP2B,ARG2,CRYAB,RGN,EFNA1,MUC1
GO: Biological Process	GO:0044262	cellular carbohydrate metabolic process			0.001939	1	0.02362	0.216	13	335	IMPA2,PTH1R,PPARGC1A,ANGPTL3,KHK,ALDOB,GOT1,PPP1R1A,GBA3,RGN,G6PC,PCK1,PCK2
GO: Biological Process	GO:1900046	regulation of hemostasis			0.001986	1	0.02403	0.2198	6	86	PTGER3,F2RL1,FGB,PLG,KNG1,TSPAN8
GO: Biological Process	GO:0035296	regulation of tube diameter			0.001986	1	0.02403	0.2198	9	183	EPHX2,PTGER3,F2RL1,FGB,CX3CL1,KNG1,NPR1,NPY1R,ACE2
GO: Biological Process	GO:0097746	regulation of blood vessel diameter			0.001986	1	0.02403	0.2198	9	183	EPHX2,PTGER3,F2RL1,FGB,CX3CL1,KNG1,NPR1,NPY1R,ACE2
GO: Biological Process	GO:0072224	metanephric glomerulus development			0.002014	1	0.0242	0.2213	3	17	NPHS2,AQP1,LHX1
GO: Biological Process	GO:0006544	glycine metabolic process			0.002014	1	0.0242	0.2213	3	17	RIDA,GLYAT,GLDC
GO: Biological Process	GO:0010248	establishment or maintenance of transmembrane electrochemical gradient			0.002014	1	0.0242	0.2213	3	17	ATP1A1,ATP1B1,FXYD2
GO: Biological Process	GO:0007420	brain development			0.002022	1	0.02424	0.2216	24	830	RIDA,ERBB4,MAOB,ACAT1,ADGRG1,MECOM,PTGER3,CA10,MET,PPARGC1A,AK4,FGF9,FGFR3,HNF1B,ANXA3,CRTAC1,AQP1,TFAP2A,LHX1,SHANK2,EGF,LRP2,EMX2,CDH1
GO: Biological Process	GO:0009308	amine metabolic process			0.002027	1	0.02424	0.2216	8	149	AOC1,MAOA,MAOB,DDC,BHMT,SULT1C2,NR1H4,AGMAT
GO: Biological Process	GO:0046879	hormone secretion			0.002032	1	0.02425	0.2217	14	378	GATA3,PTGER3,FGB,NR1H4,HNF1B,NPY1R,RBP4,REN,AQP1,TFAP2B,SLC2A2,PDE8B,LRP2,PCK2
GO: Biological Process	GO:0035150	regulation of tube size			0.002062	1	0.02449	0.2239	9	184	EPHX2,PTGER3,F2RL1,FGB,CX3CL1,KNG1,NPR1,NPY1R,ACE2
GO: Biological Process	GO:1902652	secondary alcohol metabolic process			0.002062	1	0.02449	0.2239	9	184	EPHX2,ACADL,HMGCS2,ANGPTL3,FGF1,NR1H4,CUBN,LIPC,MTTP
GO: Biological Process	GO:0030004	cellular monovalent inorganic cation homeostasis			0.00208	1	0.02465	0.2254	7	117	NR3C2,CA2,SLC4A1,ATP6V0A4,ATP1A1,SLC4A4,ATP1B1
GO: Biological Process	GO:0006536	glutamate metabolic process			0.002095	1	0.02471	0.226	4	36	GAD1,PRODH2,NR1H4,GOT1
GO: Biological Process	GO:0072028	nephron morphogenesis			0.002107	1	0.02471	0.226	6	87	SOX9,GATA3,FGF1,HNF1B,LHX1,TACSTD2
GO: Biological Process	GO:0120032	regulation of plasma membrane bounded cell projection assembly			0.00211	1	0.02471	0.226	10	221	ARHGAP24,F2RL1,SH3YL1,COBL,EPS8L2,RAP1GAP,RAB17,PODXL,AQP1,TACSTD2
GO: Biological Process	GO:0010941	regulation of cell death			0.002129	1	0.02471	0.226	46	1969	CHL1,PCP4,SOX9,PDE1A,ERBB3,ERBB4,MAL,GATA3,PERP,MECOM,ACOX2,FABP1,CCN6,MET,NELL1,PPARGC1A,CLU,KCNJ1,HPGD,HPN,TOX3,RETREG1,FGB,VAV3,FGFR3,CX3CL1,KNG1,NR1H4,COL4A3,NAT8B,HNF1B,ANK2,NOX4,CLDN7,AQP1,TFAP2A,TFAP2B,ARG2,CRYAB,RGN,EFNA1,AKR1C3,FOLH1B,MUC1,CDH1,TPD52L1
GO: Biological Process	GO:0046661	male sex differentiation			0.002139	1	0.02471	0.226	9	185	SOX9,GATA3,ADGRG1,FGF9,RBP4,REN,MAP7,AKR1C3,LRP2
GO: Biological Process	GO:0050819	negative regulation of coagulation			0.002158	1	0.02471	0.226	5	60	PTGER3,FGB,PLG,KNG1,TSPAN8
GO: Biological Process	GO:0046916	cellular transition metal ion homeostasis			0.002183	1	0.02471	0.226	7	118	CUBN,MT1E,MT1F,MT1G,MT1H,MT1X,LRP2
GO: Biological Process	GO:0042472	inner ear morphogenesis			0.002183	1	0.02471	0.226	7	118	SOX9,GATA3,CLIC5,HPN,FGF9,SLC44A4,TFAP2A
GO: Biological Process	GO:0044344	cellular response to fibroblast growth factor stimulus			0.002203	1	0.02471	0.226	8	151	GALNT3,GATA3,KL,FGF1,FGF9,FGFR3,HYAL1,LHX1
GO: Biological Process	GO:0072179	nephric duct formation			0.002231	1	0.02471	0.226	2	5	GATA3,HNF1B
GO: Biological Process	GO:1904352	positive regulation of protein catabolic process in the vacuole			0.002231	1	0.02471	0.226	2	5	RNF128,LRP2
GO: Biological Process	GO:0051167	xylulose 5-phosphate metabolic process			0.002231	1	0.02471	0.226	2	5	CRYL1,DCXR
GO: Biological Process	GO:0072221	metanephric distal convoluted tubule development			0.002231	1	0.02471	0.226	2	5	UMOD,CALB1
GO: Biological Process	GO:1901159	xylulose 5-phosphate biosynthetic process			0.002231	1	0.02471	0.226	2	5	CRYL1,DCXR
GO: Biological Process	GO:0042938	dipeptide transport			0.002231	1	0.02471	0.226	2	5	CA2,SLC15A2
GO: Biological Process	GO:0071442	positive regulation of histone H3-K14 acetylation			0.002231	1	0.02471	0.226	2	5	GATA3,NAP1L2
GO: Biological Process	GO:0006572	tyrosine catabolic process			0.002231	1	0.02471	0.226	2	5	HGD,HPD
GO: Biological Process	GO:0072025	distal convoluted tubule development			0.002231	1	0.02471	0.226	2	5	UMOD,CALB1
GO: Biological Process	GO:0071504	cellular response to heparin			0.002231	1	0.02471	0.226	2	5	SOX9,AOC1
GO: Biological Process	GO:0019541	propionate metabolic process			0.002231	1	0.02471	0.226	2	5	PCK1,PCK2
GO: Biological Process	GO:2000609	regulation of thyroid hormone generation			0.002231	1	0.02471	0.226	2	5	GATA3,HPN
GO: Biological Process	GO:1905907	negative regulation of amyloid fibril formation			0.002231	1	0.02471	0.226	2	5	CLU,CRYAB
GO: Biological Process	GO:0060681	branch elongation involved in ureteric bud branching			0.002231	1	0.02471	0.226	2	5	FGF1,HNF1B
GO: Biological Process	GO:0071332	cellular response to fructose stimulus			0.002231	1	0.02471	0.226	2	5	PPARGC1A,PCK1
GO: Biological Process	GO:0019640	glucuronate catabolic process to xylulose 5-phosphate			0.002231	1	0.02471	0.226	2	5	CRYL1,DCXR
GO: Biological Process	GO:0006001	fructose catabolic process			0.002231	1	0.02471	0.226	2	5	KHK,ALDOB
GO: Biological Process	GO:0061624	fructose catabolic process to hydroxyacetone phosphate and glyceraldehyde-3-phosphate			0.002231	1	0.02471	0.226	2	5	KHK,ALDOB
GO: Biological Process	GO:0006064	glucuronate catabolic process			0.002231	1	0.02471	0.226	2	5	CRYL1,DCXR
GO: Biological Process	GO:0035442	dipeptide transmembrane transport			0.002231	1	0.02471	0.226	2	5	CA2,SLC15A2
GO: Biological Process	GO:0061333	renal tubule morphogenesis			0.002233	1	0.02471	0.226	6	88	SOX9,GATA3,FGF1,HNF1B,LHX1,TACSTD2
GO: Biological Process	GO:0045861	negative regulation of proteolysis			0.002237	1	0.02471	0.226	14	382	CRIM1,SPINK1,FABP1,SERPINI1,KNG1,COL4A3,SERPINA6,AQP1,TFAP2B,CRYAB,EFNA1,SLPI,CDH1,SERPINA5
GO: Biological Process	GO:0009117	nucleotide metabolic process			0.002237	1	0.02471	0.226	21	694	GLYAT,CDS1,PDE1A,ACADSB,ACAT1,ACP3,PIPOX,HMGCS2,PPARGC1A,ACSM3,SULT1C2,AK4,KHK,ALDOB,NPR1,ACSF2,SLC4A1,EHHADH,PDE8B,OGDHL,PCK1
GO: Biological Process	GO:0060322	head development			0.00224	1	0.02471	0.226	25	885	SOX9,RIDA,ERBB4,MAOB,ACAT1,ADGRG1,MECOM,PTGER3,CA10,MET,PPARGC1A,AK4,FGF9,FGFR3,HNF1B,ANXA3,CRTAC1,AQP1,TFAP2A,LHX1,SHANK2,EGF,LRP2,EMX2,CDH1
GO: Biological Process	GO:0060491	regulation of cell projection assembly			0.002253	1	0.0248	0.2268	10	223	ARHGAP24,F2RL1,SH3YL1,COBL,EPS8L2,RAP1GAP,RAB17,PODXL,AQP1,TACSTD2
GO: Biological Process	GO:0050680	negative regulation of epithelial cell proliferation			0.0023	1	0.02527	0.231	9	187	SOX9,RIDA,GATA3,PBLD,HPN,FGFR3,RAP1GAP,RGN,CDH1
GO: Biological Process	GO:2000758	positive regulation of peptidyl-lysine acetylation			0.002322	1	0.02541	0.2323	4	37	GATA3,NAP1L2,PPARGC1A,MUC1
GO: Biological Process	GO:0051055	negative regulation of lipid biosynthetic process			0.002322	1	0.02541	0.2323	5	61	ACADL,NR1H4,PDE8B,AKR1C3,ATP1A1
GO: Biological Process	GO:0070365	hepatocyte differentiation			0.00239	1	0.02599	0.2376	3	18	HNF1B,PCK1,PCK2
GO: Biological Process	GO:1901160	primary amino compound metabolic process			0.00239	1	0.02599	0.2376	3	18	MAOA,DDC,AGMAT
GO: Biological Process	GO:0001977	renal system process involved in regulation of blood volume			0.00239	1	0.02599	0.2376	3	18	F2RL1,PTPRO,HSD11B2
GO: Biological Process	GO:0009914	hormone transport			0.002402	1	0.02606	0.2383	14	385	GATA3,PTGER3,FGB,NR1H4,HNF1B,NPY1R,RBP4,REN,AQP1,TFAP2B,SLC2A2,PDE8B,LRP2,PCK2
GO: Biological Process	GO:0051241	negative regulation of multicellular organismal process			0.002419	1	0.02619	0.2394	37	1500	SOX9,ERBB4,GATA3,ADGRG1,PBLD,PTGER3,F2RL1,APOM,CCN6,MET,PTPRO,HPN,FGB,FGF9,FGFR3,PLCL1,PLG,RNF128,CX3CL1,KNG1,NR1H4,TBX2,COL4A3,HNF1B,NPR1,NPR3,RAP1GAP,ANPEP,RBP4,GRB14,SOSTDC1,ARG2,RGN,EFNA1,TSPAN8,ATP1A1,TACSTD2
GO: Biological Process	GO:0009150	purine ribonucleotide metabolic process			0.00245	1	0.02647	0.242	18	561	GLYAT,PDE1A,ACADSB,ACAT1,PIPOX,HMGCS2,PPARGC1A,ACSM3,SULT1C2,AK4,KHK,ALDOB,NPR1,ACSF2,SLC4A1,EHHADH,PDE8B,OGDHL
GO: Biological Process	GO:0006753	nucleoside phosphate metabolic process			0.002561	1	0.02753	0.2518	21	702	GLYAT,CDS1,PDE1A,ACADSB,ACAT1,ACP3,PIPOX,HMGCS2,PPARGC1A,ACSM3,SULT1C2,AK4,KHK,ALDOB,NPR1,ACSF2,SLC4A1,EHHADH,PDE8B,OGDHL,PCK1
GO: Biological Process	GO:0006699	bile acid biosynthetic process			0.002564	1	0.02753	0.2518	4	38	ACOX2,NR1H4,SLC27A2,OSBPL3
GO: Biological Process	GO:0071549	cellular response to dexamethasone stimulus			0.002564	1	0.02753	0.2518	4	38	AQP1,ASS1,PCK1,PCK2
GO: Biological Process	GO:0050818	regulation of coagulation			0.002644	1	0.02834	0.2591	6	91	PTGER3,F2RL1,FGB,PLG,KNG1,TSPAN8
GO: Biological Process	GO:0090183	regulation of kidney development			0.002677	1	0.02863	0.2618	5	63	SOX9,GATA3,HNF1B,LHX1,TACSTD2
GO: Biological Process	GO:0050678	regulation of epithelial cell proliferation			0.002707	1	0.02889	0.2641	15	433	SOX9,RIDA,ERBB4,GATA3,PBLD,HPN,FGF1,FGF9,FGFR3,RAP1GAP,HYAL1,RGN,MST1L,TACSTD2,CDH1
GO: Biological Process	GO:0007009	plasma membrane organization			0.00273	1	0.02907	0.2658	10	229	PERP,CLU,KRT7,KRT8,ANK2,DSC1,ANK3,SH3GL2,PPL,SLC4A1
GO: Biological Process	GO:1902476	chloride transmembrane transport			0.002759	1	0.02928	0.2677	7	123	SLC26A4,CLIC5,CLCNKB,SLC4A1,SLC12A1,SLC12A3,GABRA2
GO: Biological Process	GO:0001894	tissue homeostasis			0.00276	1	0.02928	0.2677	11	268	SOX9,ERBB4,AZGP1,PBLD,PTH1R,KCNJ1,CA2,RBP4,NOX4,CUBN,SLC22A5
GO: Biological Process	GO:0042981	regulation of apoptotic process			0.002776	1	0.02939	0.2687	42	1779	CHL1,PCP4,SOX9,PDE1A,ERBB3,ERBB4,MAL,GATA3,PERP,FABP1,NELL1,PPARGC1A,CLU,KCNJ1,HPGD,HPN,TOX3,RETREG1,FGB,VAV3,FGFR3,CX3CL1,KNG1,NR1H4,COL4A3,NAT8B,HNF1B,ANK2,NOX4,CLDN7,AQP1,TFAP2A,TFAP2B,ARG2,CRYAB,RGN,EFNA1,AKR1C3,FOLH1B,MUC1,CDH1,TPD52L1
GO: Biological Process	GO:1905331	negative regulation of morphogenesis of an epithelium			0.002807	1	0.02942	0.269	3	19	GATA3,TBX2,TACSTD2
GO: Biological Process	GO:0032460	negative regulation of protein oligomerization			0.002807	1	0.02942	0.269	3	19	CLU,CLDN7,CRYAB
GO: Biological Process	GO:0030540	female genitalia development			0.002807	1	0.02942	0.269	3	19	RBP4,LHX1,LRP2
GO: Biological Process	GO:0090185	negative regulation of kidney development			0.002807	1	0.02942	0.269	3	19	GATA3,HNF1B,TACSTD2
GO: Biological Process	GO:0055064	chloride ion homeostasis			0.002807	1	0.02942	0.269	3	19	CA12,SLC12A1,SLC12A3
GO: Biological Process	GO:0030334	regulation of cell migration			0.002912	1	0.03044	0.2783	28	1052	SOX9,ERBB4,GATA3,ADGRG1,PBLD,PTGER3,F2RL1,MAGI2,MET,PPARGC1A,ANGPTL3,FGF1,FGF9,CX3CL1,SDC4,RAB25,PODXL,HYAL1,ANXA3,CXCL14,NOX4,AQP1,TFAP2A,EFNA1,EGF,MST1L,TACSTD2,CDH1
GO: Biological Process	GO:0071774	response to fibroblast growth factor			0.002916	1	0.03044	0.2783	8	158	GALNT3,GATA3,KL,FGF1,FGF9,FGFR3,HYAL1,LHX1
GO: Biological Process	GO:0030335	positive regulation of cell migration			0.002956	1	0.0308	0.2816	19	617	SOX9,ERBB4,GATA3,PTGER3,F2RL1,MET,ANGPTL3,FGF1,FGF9,CX3CL1,RAB25,PODXL,HYAL1,ANXA3,CXCL14,NOX4,AQP1,TFAP2A,EGF
GO: Biological Process	GO:0032526	response to retinoic acid			0.003019	1	0.03139	0.287	7	125	SOX9,HSD17B2,RBP4,MAP7,AQP1,AQP3,PCK1
GO: Biological Process	GO:2000179	positive regulation of neural precursor cell proliferation			0.00307	1	0.03186	0.2913	5	65	ADGRG1,CX3CL1,LHX1,EGF,LRP2
GO: Biological Process	GO:0052547	regulation of peptidase activity			0.003078	1	0.03188	0.2915	16	483	MAL,CRIM1,SPINK1,PERP,FABP1,SERPINI1,KNG1,COL4A3,SERPINA6,AQP1,TFAP2B,CRYAB,EFNA1,SLPI,CDH1,SERPINA5
GO: Biological Process	GO:1901361	organic cyclic compound catabolic process			0.003186	1	0.03269	0.2989	20	668	EPHX2,RIDA,HGD,PDE1A,UPB1,MAOA,MAOB,ACAT1,ALDH8A1,DAO,ALDH1L1,PRODH2,HPD,ALDH6A1,DPYS,AOX1,CUBN,RGN,PDE8B,AKR7A3
GO: Biological Process	GO:0009259	ribonucleotide metabolic process			0.003238	1	0.03269	0.2989	18	576	GLYAT,PDE1A,ACADSB,ACAT1,PIPOX,HMGCS2,PPARGC1A,ACSM3,SULT1C2,AK4,KHK,ALDOB,NPR1,ACSF2,SLC4A1,EHHADH,PDE8B,OGDHL
GO: Biological Process	GO:1901136	carbohydrate derivative catabolic process			0.003259	1	0.03269	0.2989	9	197	PDE1A,UPB1,ACAT1,GPC4,SDC4,DPYS,HYAL1,GBA3,PDE8B
GO: Biological Process	GO:0072079	nephron tubule formation			0.003265	1	0.03269	0.2989	3	20	SOX9,GATA3,HNF1B
GO: Biological Process	GO:0006590	thyroid hormone generation			0.003265	1	0.03269	0.2989	3	20	GATA3,HPN,DIO1
GO: Biological Process	GO:0006883	cellular sodium ion homeostasis			0.003265	1	0.03269	0.2989	3	20	NR3C2,ATP1A1,ATP1B1
GO: Biological Process	GO:0043523	regulation of neuron apoptotic process			0.003267	1	0.03269	0.2989	11	274	CHL1,PCP4,ERBB3,GATA3,PPARGC1A,TOX3,RETREG1,FGFR3,CX3CL1,TFAP2A,TFAP2B
GO: Biological Process	GO:0001658	branching involved in ureteric bud morphogenesis			0.003281	1	0.03269	0.2989	5	66	SOX9,FGF1,HNF1B,LHX1,TACSTD2
GO: Biological Process	GO:0009749	response to glucose			0.003284	1	0.03269	0.2989	10	235	APOM,PPARGC1A,KHK,NR1H4,COL4A3,HNF1B,NOX4,PDE8B,PCK1,PCK2
GO: Biological Process	GO:0106001	intestinal hexose absorption			0.003312	1	0.03269	0.2989	2	6	PLS1,SLC2A2
GO: Biological Process	GO:0072236	metanephric loop of Henle development			0.003312	1	0.03269	0.2989	2	6	UMOD,AQP1
GO: Biological Process	GO:0090080	positive regulation of MAPKKK cascade by fibroblast growth factor receptor signaling pathway			0.003312	1	0.03269	0.2989	2	6	KL,FGFR3
GO: Biological Process	GO:0090032	negative regulation of steroid hormone biosynthetic process			0.003312	1	0.03269	0.2989	2	6	PDE8B,ATP1A1
GO: Biological Process	GO:0060729	intestinal epithelial structure maintenance			0.003312	1	0.03269	0.2989	2	6	SOX9,SLC22A5
GO: Biological Process	GO:0071503	response to heparin			0.003312	1	0.03269	0.2989	2	6	SOX9,AOC1
GO: Biological Process	GO:0035502	metanephric part of ureteric bud development			0.003312	1	0.03269	0.2989	2	6	CALB1,LHX1
GO: Biological Process	GO:0097070	ductus arteriosus closure			0.003312	1	0.03269	0.2989	2	6	HPGD,TFAP2B
GO: Biological Process	GO:0035674	tricarboxylic acid transmembrane transport			0.003312	1	0.03269	0.2989	2	6	SLC13A3,SLC13A1
GO: Biological Process	GO:0006842	tricarboxylic acid transport			0.003312	1	0.03269	0.2989	2	6	SLC13A3,SLC13A1
GO: Biological Process	GO:0016191	synaptic vesicle uncoating			0.003312	1	0.03269	0.2989	2	6	DNAJC6,SH3GL2
GO: Biological Process	GO:0015747	urate transport			0.003312	1	0.03269	0.2989	2	6	SLC17A3,SLC17A1
GO: Biological Process	GO:0015746	citrate transport			0.003312	1	0.03269	0.2989	2	6	SLC13A3,SLC13A1
GO: Biological Process	GO:1900028	negative regulation of ruffle assembly			0.003312	1	0.03269	0.2989	2	6	ARHGAP24,TACSTD2
GO: Biological Process	GO:0006116	NADH oxidation			0.003312	1	0.03269	0.2989	2	6	ALDOB,PCK2
GO: Biological Process	GO:0015879	carnitine transport			0.003312	1	0.03269	0.2989	2	6	PDZK1,SLC22A5
GO: Biological Process	GO:0015695	organic cation transport			0.003395	1	0.03338	0.3052	4	41	PDZK1,SLC44A4,SLC22A2,SLC22A5
GO: Biological Process	GO:0046885	regulation of hormone biosynthetic process			0.003395	1	0.03338	0.3052	4	41	PPARGC1A,PDE8B,AKR1C3,ATP1A1
GO: Biological Process	GO:0051046	regulation of secretion			0.003428	1	0.03365	0.3077	26	964	PCP4,ERBB3,MAOB,GATA3,PTGER3,F2RL1,FGB,NR3C2,CX3CL1,SDC4,NR1H4,IL17RB,NPHS1,NPR1,A1CF,NPY1R,ANPEP,RBP4,REN,AQP1,TFAP2B,SLC2A2,ARG2,EGF,PDE8B,PCK2
GO: Biological Process	GO:0015748	organophosphate ester transport			0.003444	1	0.03374	0.3085	7	128	TMEM30B,SLC17A3,ABCB1,SLC44A4,SLC4A1,MTTP,G6PC
GO: Biological Process	GO:0006970	response to osmotic stress			0.003454	1	0.03377	0.3088	6	96	ABCB1,FMO1,MAP7,AQP1,SLC12A1,EFHD1
GO: Biological Process	GO:0006163	purine nucleotide metabolic process			0.003481	1	0.03398	0.3107	18	580	GLYAT,PDE1A,ACADSB,ACAT1,PIPOX,HMGCS2,PPARGC1A,ACSM3,SULT1C2,AK4,KHK,ALDOB,NPR1,ACSF2,SLC4A1,EHHADH,PDE8B,OGDHL
GO: Biological Process	GO:0009628	response to abiotic stimulus			0.003488	1	0.03398	0.3107	34	1375	SOX9,CDS1,DDAH1,ACADL,GATA3,FABP1,ABCB1,PPARGC1A,TRPM3,HPN,FGF1,AK4,MME,HSD11B2,ADIRF,GOT1,CA2,KRT8,FMO1,HYAL1,RBP4,NOX4,MAP7,AQP1,AQP3,PPL,CRYAB,SLC12A1,EFHD1,PDE8B,LRP2,ATP1A1,ATP1B1,PCK1
GO: Biological Process	GO:0072175	epithelial tube formation			0.003527	1	0.03423	0.313	8	163	SOX9,GATA3,COBL,SDC4,HNF1B,PODXL,TFAP2A,LRP2
GO: Biological Process	GO:0051384	response to glucocorticoid			0.003527	1	0.03423	0.313	8	163	MAOB,HSD11B2,GOT1,ANXA3,AQP1,ASS1,PCK1,PCK2
GO: Biological Process	GO:0104004	cellular response to environmental stimulus			0.003682	1	0.0356	0.3255	13	361	SOX9,GATA3,MME,ADIRF,GOT1,HYAL1,NOX4,AQP1,CRYAB,SLC12A1,EFHD1,ATP1A1,PCK1
GO: Biological Process	GO:0071214	cellular response to abiotic stimulus			0.003682	1	0.0356	0.3255	13	361	SOX9,GATA3,MME,ADIRF,GOT1,HYAL1,NOX4,AQP1,CRYAB,SLC12A1,EFHD1,ATP1A1,PCK1
GO: Biological Process	GO:0110111	negative regulation of animal organ morphogenesis			0.003708	1	0.03566	0.3261	4	42	GATA3,TBX2,HNF1B,TACSTD2
GO: Biological Process	GO:0000096	sulfur amino acid metabolic process			0.003708	1	0.03566	0.3261	4	42	BHMT,BHMT2,NOX4,MSRA
GO: Biological Process	GO:0009069	serine family amino acid metabolic process			0.003708	1	0.03566	0.3261	4	42	RIDA,GLYAT,DAO,GLDC
GO: Biological Process	GO:0051346	negative regulation of hydrolase activity			0.003752	1	0.03596	0.3288	16	493	CRIM1,SPINK1,FABP1,SERPINI1,HPN,ANGPTL3,KNG1,COL4A3,SERPINA6,AQP1,TFAP2B,PPP1R1A,CRYAB,RGN,SLPI,SERPINA5
GO: Biological Process	GO:0016137	glycoside metabolic process			0.003767	1	0.03596	0.3288	3	21	GBA3,SLC34A1,AKR1C3
GO: Biological Process	GO:0043691	reverse cholesterol transport			0.003767	1	0.03596	0.3288	3	21	APOM,CLU,LIPC
GO: Biological Process	GO:0009083	branched-chain amino acid catabolic process			0.003767	1	0.03596	0.3288	3	21	ACADSB,ACAT1,ALDH6A1
GO: Biological Process	GO:0019693	ribose phosphate metabolic process			0.003806	1	0.03625	0.3315	18	585	GLYAT,PDE1A,ACADSB,ACAT1,PIPOX,HMGCS2,PPARGC1A,ACSM3,SULT1C2,AK4,KHK,ALDOB,NPR1,ACSF2,SLC4A1,EHHADH,PDE8B,OGDHL
GO: Biological Process	GO:0009746	response to hexose			0.003811	1	0.03625	0.3315	10	240	APOM,PPARGC1A,KHK,NR1H4,COL4A3,HNF1B,NOX4,PDE8B,PCK1,PCK2
GO: Biological Process	GO:0052548	regulation of endopeptidase activity			0.003953	1	0.03753	0.3432	15	451	CRIM1,SPINK1,PERP,FABP1,SERPINI1,KNG1,COL4A3,SERPINA6,AQP1,TFAP2B,CRYAB,EFNA1,SLPI,CDH1,SERPINA5
GO: Biological Process	GO:1903524	positive regulation of blood circulation			0.004021	1	0.03811	0.3484	6	99	PTGER3,F2RL1,FGB,NPY1R,ACE2,ATP1A1
GO: Biological Process	GO:0009112	nucleobase metabolic process			0.00404	1	0.03823	0.3495	4	43	ACP3,ALDH6A1,DPYS,AOX1
GO: Biological Process	GO:0050954	sensory perception of mechanical stimulus			0.004099	1	0.03871	0.354	9	204	SLC26A4,CLIC5,HPN,COL4A3,EPS8L2,TFAP2A,ATP6V0A4,LRP2,CDH1
GO: Biological Process	GO:0019748	secondary metabolic process			0.004231	1	0.03981	0.364	5	70	DDC,TYRP1,FMO1,AKR7A3,AKR1C3
GO: Biological Process	GO:0071384	cellular response to corticosteroid stimulus			0.004231	1	0.03981	0.364	5	70	AQP1,ASS1,AKR1C3,PCK1,PCK2
GO: Biological Process	GO:0044872	lipoprotein localization			0.004313	1	0.0403	0.3685	3	22	CUBN,MTTP,LRP2
GO: Biological Process	GO:0042953	lipoprotein transport			0.004313	1	0.0403	0.3685	3	22	CUBN,MTTP,LRP2
GO: Biological Process	GO:0030903	notochord development			0.004313	1	0.0403	0.3685	3	22	SOX9,COBL,EFNA1
GO: Biological Process	GO:0060602	branch elongation of an epithelium			0.004313	1	0.0403	0.3685	3	22	SOX9,FGF1,HNF1B
GO: Biological Process	GO:0048738	cardiac muscle tissue development			0.00439	1	0.04089	0.3739	11	285	ERBB3,ERBB4,MET,FGF1,FGF9,TBX2,SORBS2,NEBL,RBP4,NOX4,LRP2
GO: Biological Process	GO:0030501	positive regulation of bone mineralization			0.004392	1	0.04089	0.3739	4	44	NELL1,KL,FGFR3,TFAP2A
GO: Biological Process	GO:0110110	positive regulation of animal organ morphogenesis			0.004435	1	0.04093	0.3742	6	101	SOX9,GATA3,HPN,FGF1,TFAP2A,LHX1
GO: Biological Process	GO:0120178	steroid hormone biosynthetic process			0.004496	1	0.04093	0.3742	5	71	PPARGC1A,HSD11B2,HSD17B2,AKR1C3,ATP1A1
GO: Biological Process	GO:0034284	response to monosaccharide			0.00453	1	0.04093	0.3742	10	246	APOM,PPARGC1A,KHK,NR1H4,COL4A3,HNF1B,NOX4,PDE8B,PCK1,PCK2
GO: Biological Process	GO:0045216	cell-cell junction organization			0.004543	1	0.04093	0.3742	8	170	PERP,F2RL1,PTPRO,NR1H4,ANK2,ACE2,CDH1,CDH6
GO: Biological Process	GO:0072235	metanephric distal tubule development			0.004591	1	0.04093	0.3742	2	7	UMOD,CALB1
GO: Biological Process	GO:0009820	alkaloid metabolic process			0.004591	1	0.04093	0.3742	2	7	CYP3A5,DDC
GO: Biological Process	GO:1901162	primary amino compound biosynthetic process			0.004591	1	0.04093	0.3742	2	7	DDC,AGMAT
GO: Biological Process	GO:0061518	microglial cell proliferation			0.004591	1	0.04093	0.3742	2	7	CLU,CX3CL1
GO: Biological Process	GO:0071440	regulation of histone H3-K14 acetylation			0.004591	1	0.04093	0.3742	2	7	GATA3,NAP1L2
GO: Biological Process	GO:0071422	succinate transmembrane transport			0.004591	1	0.04093	0.3742	2	7	SLC13A3,SLC13A1
GO: Biological Process	GO:0070295	renal water absorption			0.004591	1	0.04093	0.3742	2	7	AQP1,AQP3
GO: Biological Process	GO:0072014	proximal tubule development			0.004591	1	0.04093	0.3742	2	7	ACAT1,AQP1
GO: Biological Process	GO:0060059	embryonic retina morphogenesis in camera-type eye			0.004591	1	0.04093	0.3742	2	7	RBP4,LHX1
GO: Biological Process	GO:0071267	L-methionine salvage			0.004591	1	0.04093	0.3742	2	7	BHMT,BHMT2
GO: Biological Process	GO:0071265	L-methionine biosynthetic process			0.004591	1	0.04093	0.3742	2	7	BHMT,BHMT2
GO: Biological Process	GO:0043102	amino acid salvage			0.004591	1	0.04093	0.3742	2	7	BHMT,BHMT2
GO: Biological Process	GO:0032534	regulation of microvillus assembly			0.004591	1	0.04093	0.3742	2	7	RAP1GAP,PODXL
GO: Biological Process	GO:0000101	sulfur amino acid transport			0.004591	1	0.04093	0.3742	2	7	SLC3A1,SLC7A9
GO: Biological Process	GO:0015793	glycerol transport			0.004591	1	0.04093	0.3742	2	7	AQP1,AQP3
GO: Biological Process	GO:0072318	clathrin coat disassembly			0.004591	1	0.04093	0.3742	2	7	DNAJC6,SH3GL2
GO: Biological Process	GO:0015712	hexose phosphate transport			0.004591	1	0.04093	0.3742	2	7	SLC17A3,G6PC
GO: Biological Process	GO:0015760	glucose-6-phosphate transport			0.004591	1	0.04093	0.3742	2	7	SLC17A3,G6PC
GO: Biological Process	GO:0015744	succinate transport			0.004591	1	0.04093	0.3742	2	7	SLC13A3,SLC13A1
GO: Biological Process	GO:0071918	urea transmembrane transport			0.004591	1	0.04093	0.3742	2	7	AQP3,SLC14A1
GO: Biological Process	GO:0015838	amino-acid betaine transport			0.004591	1	0.04093	0.3742	2	7	PDZK1,SLC22A5
GO: Biological Process	GO:0060548	negative regulation of cell death			0.004678	1	0.04164	0.3807	30	1192	CHL1,PCP4,SOX9,ERBB3,ERBB4,GATA3,MECOM,FABP1,CCN6,MET,PPARGC1A,CLU,KCNJ1,HPN,TOX3,RETREG1,FGB,CX3CL1,NR1H4,NAT8B,HNF1B,CLDN7,AQP1,TFAP2A,TFAP2B,ARG2,CRYAB,RGN,EFNA1,MUC1
GO: Biological Process	GO:0003382	epithelial cell morphogenesis			0.004764	1	0.04233	0.387	4	45	MET,COL4A4,RAB25,CDH1
GO: Biological Process	GO:0048469	cell maturation			0.004796	1	0.04249	0.3885	9	209	SPINK1,GATA3,PTH1R,DEFB1,TFCP2L1,CX3CL1,ANK3,GRB14,REN
GO: Biological Process	GO:0034754	cellular hormone metabolic process			0.004802	1	0.04249	0.3885	7	136	CYP3A5,ALDH8A1,ADH6,PPARGC1A,HSD17B2,RBP4,AKR1C3
GO: Biological Process	GO:0048568	embryonic organ development			0.004807	1	0.04249	0.3885	16	506	SOX9,GATA3,CLIC5,HPN,COBL,FGF9,PLG,TBX2,HNF1B,KRT8,HYAL1,RBP4,SLC44A4,TFAP2A,LHX1,EFNA1
GO: Biological Process	GO:0048485	sympathetic nervous system development			0.004905	1	0.04293	0.3925	3	23	GATA3,TFAP2A,TFAP2B
GO: Biological Process	GO:0032026	response to magnesium ion			0.004905	1	0.04293	0.3925	3	23	KCNJ1,ANK3,SLC34A1
GO: Biological Process	GO:0015669	gas transport			0.004905	1	0.04293	0.3925	3	23	CA2,CA12,AQP1
GO: Biological Process	GO:0032656	regulation of interleukin-13 production			0.004905	1	0.04293	0.3925	3	23	GATA3,IL17RB,ARG2
GO: Biological Process	GO:0006833	water transport			0.004905	1	0.04293	0.3925	3	23	AQP1,AQP3,SLC14A1
GO: Biological Process	GO:0009067	aspartate family amino acid biosynthetic process			0.004905	1	0.04293	0.3925	3	23	BHMT,BHMT2,GOT1
GO: Biological Process	GO:0016052	carbohydrate catabolic process			0.004946	1	0.04322	0.3951	9	210	PPARGC1A,KHK,ALDOB,SLC4A1,GBA3,CRYL1,OGDHL,G6PC,DCXR
GO: Biological Process	GO:0007507	heart development			0.005248	1	0.04578	0.4186	20	699	SOX9,ERBB3,ERBB4,GATA3,MECOM,MET,FGF1,FGF9,TBX2,NPY1R,SORBS2,ANK2,NEBL,RBP4,NOX4,TFAP2A,EFNA1,GALNT11,SLC22A5,LRP2
GO: Biological Process	GO:0043066	negative regulation of apoptotic process			0.005305	1	0.04619	0.4224	27	1048	CHL1,PCP4,SOX9,ERBB3,ERBB4,GATA3,FABP1,PPARGC1A,CLU,KCNJ1,HPN,TOX3,RETREG1,FGB,CX3CL1,NR1H4,NAT8B,HNF1B,CLDN7,AQP1,TFAP2A,TFAP2B,ARG2,CRYAB,RGN,EFNA1,MUC1
GO: Biological Process	GO:0050891	multicellular organismal water homeostasis			0.005362	1	0.04654	0.4255	5	74	MET,AQP1,AQP3,TFAP2B,CDH1
GO: Biological Process	GO:0001885	endothelial cell development			0.005362	1	0.04654	0.4255	5	74	F2RL1,ABCB1,MET,COL4A4,REN
GO: Biological Process	GO:0045834	positive regulation of lipid metabolic process			0.005398	1	0.04675	0.4274	8	175	FABP1,PPARGC1A,ANGPTL3,FGF1,VAV3,FGFR3,NR1H4,RGN
GO: Biological Process	GO:1901657	glycosyl compound metabolic process			0.005404	1	0.04675	0.4274	7	139	UPB1,ACP3,AK4,DPYS,GBA3,SLC34A1,AKR1C3
GO: Biological Process	GO:0072503	cellular divalent inorganic cation homeostasis			0.005443	1	0.04701	0.4299	17	559	EPHX2,PTGER3,F2RL1,PTH1R,CX3CL1,KNG1,GOT1,NPY1R,CALB1,ANK2,MT1E,MT1F,MT1G,MT1H,RGN,MT1X,ATP1B1
GO: Biological Process	GO:0032462	regulation of protein homooligomerization			0.005543	1	0.04764	0.4356	3	24	CLU,CLDN7,CRYAB
GO: Biological Process	GO:0032291	axon ensheathment in central nervous system			0.005543	1	0.04764	0.4356	3	24	CLU,FGFR3,ASPA
GO: Biological Process	GO:0022010	central nervous system myelination			0.005543	1	0.04764	0.4356	3	24	CLU,FGFR3,ASPA
GO: Biological Process	GO:0003006	developmental process involved in reproduction			0.005609	1	0.04813	0.4401	22	801	SOX9,SPINK1,GATA3,ADGRG1,DEFB1,MET,FGF9,MME,PLG,HSD17B2,HNF1B,KRT8,RBP4,GRB14,REN,MAP7,LHX1,SLC22A5,AKR1C3,LRP2,CDH1,SERPINA5
GO: Biological Process	GO:0051048	negative regulation of secretion			0.005659	1	0.04848	0.4433	11	295	ERBB3,MAOB,PTGER3,F2RL1,CX3CL1,NR1H4,NPY1R,ANPEP,ARG2,EGF,PDE8B
GO: Biological Process	GO:0023061	signal release			0.005733	1	0.04903	0.4483	17	562	GAD1,GATA3,PTGER3,FGB,NR3C2,NR1H4,HNF1B,NPY1R,RBP4,REN,AQP1,TFAP2B,SLC2A2,PDE8B,SLC22A2,LRP2,PCK2
GO: Biological Process	GO:0032412	regulation of ion transmembrane transporter activity			0.005801	1	0.04953	0.4528	11	296	PDZK1,ABCB1,PPARGC1A,KCNJ1,ANK2,ANK3,ANXA3,RGN,SHANK2,ATP1B1,FXYD2
GO: Biological Process	GO:0042471	ear morphogenesis			0.005835	1	0.04974	0.4548	7	141	SOX9,GATA3,CLIC5,HPN,FGF9,SLC44A4,TFAP2A
GO: Cellular Component	GO:0045177	apical part of cell			8.171e-22	3.841e-19	3.841e-19	2.585e-18	43	465	CHL1,ERBB3,MAL,SLC17A3,SLC26A4,PDZK1,ACP3,PTH1R,FABP1,ABCB1,KL,CLIC5,PTPRO,HPN,UMOD,SLC5A12,CA2,RHCG,SORBS2,RAB17,ANK2,PODXL,NOX4,REN,CUBN,SLC44A4,AQP1,SLC2A2,SLC7A9,SLC10A2,SHANK2,SLC12A1,SLC12A3,SLC17A1,SLC34A1,SLC22A5,ATP6V0A4,LRP2,ATP1A1,ATP1B1,MUC1,CDH1,ENPEP
GO: Cellular Component	GO:0016323	basolateral plasma membrane	1		3.366e-20	1.582e-17	7.91e-18	5.324e-17	32	259	ERBB3,ERBB4,PTH1R,MET,SLC22A6,HPGD,KCNJ16,UMOD,CA2,RHCG,RAB17,ANK2,ANK3,CLDN7,MAP7,AQP1,AQP3,CLDN8,SLC2A2,SLC4A1,SLCO4C1,SLC14A1,SLC34A1,SLC22A2,SLC22A5,MTTP,ATP1A1,SLC4A4,ATP1B1,TACSTD2,CDH1,CDH16
GO: Cellular Component	GO:0016324	apical plasma membrane	1		6.692e-20	3.145e-17	1.048e-17	7.057e-17	37	373	ERBB3,MAL,SLC17A3,SLC26A4,PDZK1,PTH1R,ABCB1,KL,CLIC5,PTPRO,HPN,UMOD,SLC5A12,RHCG,SORBS2,RAB17,ANK2,PODXL,NOX4,CUBN,SLC44A4,AQP1,SLC2A2,SLC7A9,SLC10A2,SHANK2,SLC12A1,SLC12A3,SLC17A1,SLC34A1,SLC22A5,ATP6V0A4,LRP2,ATP1A1,ATP1B1,MUC1,ENPEP
GO: Cellular Component	GO:0031526	brush border membrane			6.989e-19	3.285e-16	8.212e-17	5.528e-16	19	72	SLC17A3,SLC26A4,PDZK1,PTGER3,PTH1R,ANPEP,CUBN,AQP1,SLC2A2,SLC3A1,SLC7A9,ACE2,SHANK2,SLC34A1,SLC22A5,ATP6V0A4,MTTP,LRP2,ENPEP
GO: Cellular Component	GO:0098862	cluster of actin-based cell projections			3.648e-17	1.715e-14	3.429e-15	2.308e-14	26	200	SLC17A3,SLC26A4,PDZK1,PTGER3,PTH1R,CLIC5,PVALB,MME,PLS1,EPS8L2,CALB1,ANPEP,CUBN,AQP1,SLC2A2,SLC3A1,SLC7A9,ACE2,SHANK2,SLC34A1,SLC22A5,ATP6V0A4,MTTP,LRP2,ENPEP,DCXR
GO: Cellular Component	GO:0005903	brush border			1.085e-16	5.097e-14	8.496e-15	5.718e-14	22	137	SLC17A3,SLC26A4,PDZK1,PTGER3,PTH1R,MME,PLS1,ANPEP,CUBN,AQP1,SLC2A2,SLC3A1,SLC7A9,ACE2,SHANK2,SLC34A1,SLC22A5,ATP6V0A4,MTTP,LRP2,ENPEP,DCXR
GO: Cellular Component	GO:0005902	microvillus			1.973e-16	9.274e-14	1.325e-14	8.917e-14	26	214	SLC17A3,SLC26A4,PDZK1,PTGER3,PTH1R,MME,PLS1,CA2,ANPEP,PODXL,CUBN,AQP1,SLC2A2,SLC3A1,SLC7A9,ACE2,LIPC,SLC10A2,SHANK2,SLC34A1,SLC22A5,ATP6V0A4,MTTP,LRP2,ENPEP,DCXR
GO: Cellular Component	GO:0098858	actin-based cell projection			6.432e-16	3.023e-13	3.779e-14	2.544e-13	32	361	SLC17A3,SLC26A4,PDZK1,ACP3,PTGER3,PTH1R,CLIC5,PVALB,MME,PLS1,CA2,EPS8L2,CALB1,ANPEP,PODXL,CUBN,AQP1,SLC2A2,SLC3A1,SLC7A9,ACE2,LIPC,SLC10A2,SHANK2,SLC34A1,OSBPL3,SLC22A5,ATP6V0A4,MTTP,LRP2,ENPEP,DCXR
GO: Cellular Component	GO:0032432	actin filament bundle			1.374e-15	6.457e-13	7.174e-14	4.829e-13	29	298	SLC17A3,SLC26A4,PDZK1,PTGER3,PTH1R,MME,PLS1,CA2,NEBL,ANPEP,PODXL,NOX4,CUBN,AQP1,SLC2A2,SLC3A1,SLC7A9,CRYAB,ACE2,LIPC,SLC10A2,SHANK2,SLC34A1,SLC22A5,ATP6V0A4,MTTP,LRP2,ENPEP,DCXR
GO: Cellular Component	GO:0005884	actin filament			1.804e-14	8.48e-12	8.48e-13	5.708e-12	36	518	SLC17A3,SLC26A4,PDZK1,ACP3,PTGER3,PTH1R,CLIC5,PVALB,COBL,MME,PLS1,CA2,EPS8L2,CALB1,NEBL,ANPEP,PODXL,NOX4,CUBN,AQP1,SLC2A2,SLC3A1,SLC7A9,CRYAB,ACE2,LIPC,SLC10A2,SHANK2,SLC34A1,OSBPL3,SLC22A5,ATP6V0A4,MTTP,LRP2,ENPEP,DCXR
GO: Cellular Component	GO:0031226	intrinsic component of plasma membrane			1.322e-11	6.214e-09	5.649e-10	3.803e-09	65	1790	TSPAN12,ERBB3,ERBB4,SLC17A3,SLC26A4,PERP,ADGRG1,CLEC4M,PTGER3,F2RL1,PLPPR1,PTH1R,MET,SLC22A6,NPHS2,KL,CLCNKB,PTPRO,KCNJ1,HPN,KCNJ15,KCNJ16,GPC4,FGFR3,MME,SDC4,IL17RB,TRHDE,RHCG,NPHS1,NPR3,NPY1R,ANK2,PODXL,NOX4,AQP1,AQP3,SLC2A2,SLC3A1,TSPAN1,SLC4A1,SLC7A9,SLC6A13,EFNA1,SLC10A2,SHANK2,SLC12A3,SLCO4C1,SLC13A1,SLC16A4,SLC14A1,SLC15A2,SLC17A1,SLC34A1,SLC22A2,TSPAN8,FOLH1B,ATP1A1,SLC4A4,ATP1B1,FXYD2,MU…
GO: Cellular Component	GO:0005887	integral component of plasma membrane			1.603e-11	7.533e-09	6.278e-10	4.225e-09	63	1710	TSPAN12,ERBB3,ERBB4,SLC17A3,SLC26A4,PERP,ADGRG1,CLEC4M,PTGER3,F2RL1,PLPPR1,PTH1R,MET,SLC22A6,NPHS2,KL,CLCNKB,PTPRO,KCNJ1,HPN,KCNJ15,KCNJ16,FGFR3,MME,SDC4,IL17RB,TRHDE,RHCG,NPHS1,NPR3,NPY1R,ANK2,PODXL,NOX4,AQP1,AQP3,SLC2A2,SLC3A1,TSPAN1,SLC4A1,SLC7A9,SLC6A13,SLC10A2,SHANK2,SLC12A3,SLCO4C1,SLC13A1,SLC16A4,SLC14A1,SLC15A2,SLC17A1,SLC34A1,SLC22A2,TSPAN8,FOLH1B,ATP1A1,SLC4A4,ATP1B1,FXYD2,MUC1,ENPEP,CD…
GO: Cellular Component	GO:0015629	actin cytoskeleton			1.46e-10	6.861e-08	5.278e-09	3.553e-08	39	814	SLC17A3,SLC26A4,PDZK1,ACP3,PTGER3,PTH1R,CLIC5,PVALB,COBL,MME,PLS1,CA2,EPS8L2,SORBS2,CALB1,NEBL,ANPEP,PODXL,NOX4,CUBN,AQP1,SLC2A2,SLC3A1,SLC7A9,CRYAB,MSRA,ACE2,LIPC,SLC10A2,SHANK2,SLC34A1,OSBPL3,SLC22A5,ATP6V0A4,MTTP,LRP2,CDH1,ENPEP,DCXR
GO: Cellular Component	GO:0031253	cell projection membrane			4.674e-10	2.197e-07	1.569e-08	1.056e-07	25	373	SLC17A3,SLC26A4,PDZK1,PTGER3,PTH1R,SH3YL1,UMOD,EPS8L2,RAB25,ANPEP,PODXL,CUBN,AQP1,SLC2A2,SLC3A1,SLC7A9,ACE2,SHANK2,SLC34A1,SLC22A5,ATP6V0A4,MTTP,LRP2,ENPEP,GABRA2
GO: Cellular Component	GO:0099081	supramolecular polymer			5.168e-08	2.429e-05	1.582e-06	1.065e-05	51	1529	CHL1,PCP4,SLC17A3,SLC26A4,PDZK1,ACP3,PTGER3,PTH1R,DEFB1,MET,CLIC5,PVALB,COBL,MME,PLS1,SDC4,CA2,COL4A3,COL4A4,KRT7,KRT8,EPS8L2,SORBS2,CALB1,ANK2,ANK3,NEBL,ANPEP,PODXL,NOX4,CUBN,MAP7,AQP1,SLC2A2,PPL,SLC3A1,SLC4A1,SLC7A9,CRYAB,ACE2,LIPC,SLC10A2,SHANK2,SLC34A1,OSBPL3,SLC22A5,ATP6V0A4,MTTP,LRP2,ENPEP,DCXR
GO: Cellular Component	GO:0099080	supramolecular complex			5.387e-08	2.532e-05	1.582e-06	1.065e-05	51	1531	CHL1,PCP4,SLC17A3,SLC26A4,PDZK1,ACP3,PTGER3,PTH1R,DEFB1,MET,CLIC5,PVALB,COBL,MME,PLS1,SDC4,CA2,COL4A3,COL4A4,KRT7,KRT8,EPS8L2,SORBS2,CALB1,ANK2,ANK3,NEBL,ANPEP,PODXL,NOX4,CUBN,MAP7,AQP1,SLC2A2,PPL,SLC3A1,SLC4A1,SLC7A9,CRYAB,ACE2,LIPC,SLC10A2,SHANK2,SLC34A1,OSBPL3,SLC22A5,ATP6V0A4,MTTP,LRP2,ENPEP,DCXR
GO: Cellular Component	GO:0099512	supramolecular fiber			2.864e-07	0.0001346	7.919e-06	5.33e-05	49	1522	CHL1,PCP4,SLC17A3,SLC26A4,PDZK1,ACP3,PTGER3,PTH1R,DEFB1,MET,CLIC5,PVALB,COBL,MME,PLS1,SDC4,CA2,KRT7,KRT8,EPS8L2,SORBS2,CALB1,ANK2,ANK3,NEBL,ANPEP,PODXL,NOX4,CUBN,MAP7,AQP1,SLC2A2,PPL,SLC3A1,SLC4A1,SLC7A9,CRYAB,ACE2,LIPC,SLC10A2,SHANK2,SLC34A1,OSBPL3,SLC22A5,ATP6V0A4,MTTP,LRP2,ENPEP,DCXR
GO: Cellular Component	GO:0005911	cell-cell junction	1		7.322e-07	0.0003441	1.912e-05	0.0001287	24	506	AOC1,PERP,ABCB1,MAGI2,NPHS2,HPN,NPHS1,KRT8,ANK2,DSC1,ANK3,PODXL,CLDN7,AQP3,CLDN10,CLDN8,SLC2A2,PPL,SLC4A1,ATP1A1,ATP1B1,TACSTD2,CDH1,CDH6
GO: Cellular Component	GO:0099513	polymeric cytoskeletal fiber			1.085e-06	0.00051	2.684e-05	0.0001807	43	1313	PCP4,SLC17A3,SLC26A4,PDZK1,ACP3,PTGER3,PTH1R,DEFB1,MET,CLIC5,PVALB,COBL,MME,PLS1,CA2,KRT7,KRT8,EPS8L2,CALB1,NEBL,ANPEP,PODXL,NOX4,CUBN,MAP7,AQP1,SLC2A2,PPL,SLC3A1,SLC7A9,CRYAB,ACE2,LIPC,SLC10A2,SHANK2,SLC34A1,OSBPL3,SLC22A5,ATP6V0A4,MTTP,LRP2,ENPEP,DCXR
GO: Cellular Component	GO:0031907	microbody lumen			1.517e-06	0.0007129	3.395e-05	0.0002285	8	55	EPHX2,PIPOX,DAO,ACOX2,FABP1,PHYH,EHHADH,HAO2
GO: Cellular Component	GO:0005782	peroxisomal matrix			1.517e-06	0.0007129	3.395e-05	0.0002285	8	55	EPHX2,PIPOX,DAO,ACOX2,FABP1,PHYH,EHHADH,HAO2
GO: Cellular Component	GO:0045121	membrane raft			2.453e-06	0.001153	5.209e-05	0.0003506	20	396	ERBB4,MAL,PDZK1,ADGRG1,SLC22A6,NPHS2,UMOD,MME,SDC4,NPHS1,ANK2,PODXL,AQP1,ACE2,PLLP,SLC34A1,LRP2,ATP1A1,ATP1B1,CDH1
GO: Cellular Component	GO:0098857	membrane microdomain			2.549e-06	0.001198	5.209e-05	0.0003506	20	397	ERBB4,MAL,PDZK1,ADGRG1,SLC22A6,NPHS2,UMOD,MME,SDC4,NPHS1,ANK2,PODXL,AQP1,ACE2,PLLP,SLC34A1,LRP2,ATP1A1,ATP1B1,CDH1
GO: Cellular Component	GO:0098589	membrane region			4.294e-06	0.002018	8.409e-05	0.000566	20	411	ERBB4,MAL,PDZK1,ADGRG1,SLC22A6,NPHS2,UMOD,MME,SDC4,NPHS1,ANK2,PODXL,AQP1,ACE2,PLLP,SLC34A1,LRP2,ATP1A1,ATP1B1,CDH1
GO: Cellular Component	GO:0009925	basal plasma membrane			5.091e-06	0.002393	9.572e-05	0.0006443	7	46	ERBB3,ERBB4,MET,RHCG,ANK3,AQP1,TACSTD2
GO: Cellular Component	GO:0036056	filtration diaphragm			9.616e-06	0.00452	0.0001674	0.001127	4	10	MAGI2,NPHS2,NPHS1,PODXL
GO: Cellular Component	GO:0036057	slit diaphragm			9.616e-06	0.00452	0.0001674	0.001127	4	10	MAGI2,NPHS2,NPHS1,PODXL
GO: Cellular Component	GO:0005777	peroxisome			1.285e-05	0.006041	0.0002083	0.001402	11	146	EPHX2,RIDA,AOC1,PIPOX,DAO,ACOX2,FABP1,PHYH,SLC27A2,EHHADH,HAO2
GO: Cellular Component	GO:0042579	microbody			1.285e-05	0.006041	0.0002083	0.001402	11	146	EPHX2,RIDA,AOC1,PIPOX,DAO,ACOX2,FABP1,PHYH,SLC27A2,EHHADH,HAO2
GO: Cellular Component	GO:0098805	whole membrane			7.137e-05	0.03354	0.001118	0.007526	47	1760	GAD1,ERBB4,MAL,MAOA,MAOB,PDZK1,ACP3,ADGRG1,DAO,TYRP1,SLC22A6,NPHS2,UMOD,MME,UGT2B28,SDC4,SLC27A2,NPHS1,RAB17,ANK2,DSC1,ANPEP,PODXL,ANXA3,SH3GL2,TOM1L1,GRB14,CUBN,AQP1,SLC3A1,TSPAN1,ACE2,PLLP,EGF,SLCO4C1,SLC34A1,CLMN,ATP6V0A4,ASS1,LRP2,ATP1A1,ATP1B1,CDH1,ENPEP,SERPINA5,CYB5A,GABRA2
GO: Cellular Component	GO:0045178	basal part of cell			8.394e-05	0.03945	0.001273	0.008566	7	70	ERBB3,ERBB4,MET,RHCG,ANK3,AQP1,TACSTD2
GO: Cellular Component	GO:0005739	mitochondrion			0.000146	0.06861	0.002144	0.01443	48	1866	RIDA,GLYAT,GAD1,ERBB4,DDAH1,MAOA,ACADL,MAOB,ACADSB,ACAT1,PERP,GATM,DAO,HMGCS2,ALDH1L1,ABCB1,CCN6,PPARGC1A,PRODH2,PHYH,TFCP2L1,ACSM3,CLU,GLDC,AK4,BBOX1,ALDH6A1,GOT1,SLC27A2,ANK2,NOX4,ACSF2,PPL,SLC3A1,ARG2,CRYAB,MSRA,ECHDC3,EHHADH,EFHD1,ASS1,AGMAT,OGDHL,PCCA,HAO2,PCK1,PCK2,CYB5A
GO: Cellular Component	GO:0009986	cell surface			0.0001962	0.09223	0.002795	0.01881	31	1035	AZGP1,PTGER3,ABCB1,MET,CLU,HPN,GPC4,ANGPTL3,FGB,FGFR3,MME,PLG,CX3CL1,SDC4,IL17RB,ANK3,ANPEP,CUBN,SLC4A1,CRYAB,ACE2,LIPC,SLC12A1,SLC34A1,TSPAN8,LRP2,MUC1,CDH1,CDH6,ENPEP,SERPINA5
GO: Cellular Component	GO:0043034	costamere			0.0002907	0.1366	0.004018	0.02704	4	22	SDC4,KRT8,ANK2,ANK3
GO: Cellular Component	GO:0016328	lateral plasma membrane			0.0003548	0.1668	0.004765	0.03207	6	63	ERBB3,PTPRO,ANK3,CLDN7,TACSTD2,CDH1
GO: Cellular Component	GO:0030054	cell junction			0.0005691	0.2675	0.00743	0.05001	36	1352	ARHGAP24,AOC1,LZTS3,PERP,IRF6,ABCB1,MAGI2,NPHS2,HPN,FGFR3,MME,SDC4,NPHS1,KRT8,SORBS2,ANK2,DSC1,ANK3,PODXL,NOX4,CLDN7,AQP3,CLDN10,CLDN8,SLC2A2,PPL,TSPAN1,SLC4A1,SHANK2,ATP1A1,ATP1B1,TACSTD2,CDH1,CDH6,C4orf19,GABRA2
GO: Cellular Component	GO:0030424	axon			0.000606	0.2848	0.007698	0.05181	25	817	PCP4,GAD1,DDC,CLU,PTPRO,PVALB,COBL,MME,GOT1,CA2,RAP1GAP,NPY1R,CALB1,ANK2,ANK3,ANXA3,SH3GL2,CRTAC1,MAP7,AQP1,CRYAB,SHANK2,LRP2,CDH1,GABRA2
GO: Cellular Component	GO:0005890	sodium:potassium-exchanging ATPase complex			0.0006603	0.3103	0.008167	0.05497	3	12	ATP1A1,ATP1B1,FXYD2
GO: Cellular Component	GO:0048471	perinuclear region of cytoplasm			0.0006847	0.3218	0.008252	0.05554	25	824	GALNT3,SLC17A3,MAGI2,NELL1,CLU,COBL,FGFR3,RNF128,ALDOB,CX3CL1,SORBS2,ANK2,SH3GL2,NOX4,MAP7,TSPAN1,MT1E,MT1F,MT1G,MT1H,MT1X,SLC34A1,OSBPL3,CDH1,TPD52L1
GO: Cellular Component	GO:1990357	terminal web			0.001313	0.617	0.01542	0.1038	2	4	COBL,PLS1
GO: Cellular Component	GO:0043025	neuronal cell body			0.001604	0.7539	0.01799	0.1211	22	732	PDE1A,PTGER3,DDC,MET,PPARGC1A,SERPINI1,HPN,PVALB,COBL,MME,CX3CL1,RAP1GAP,SORBS2,CALB1,RAB17,ANXA3,SH3GL2,AQP1,CRYAB,SHANK2,ASS1,GABRA2
GO: Cellular Component	GO:0090533	cation-transporting ATPase complex			0.001608	0.7557	0.01799	0.1211	3	16	ATP1A1,ATP1B1,FXYD2
GO: Cellular Component	GO:0005764	lysosome			0.001688	0.7934	0.01834	0.1234	22	735	SLC17A3,ACP3,GPC4,FGFR3,ALDOB,SDC4,GOT1,ANK2,ANK3,ANPEP,HYAL1,TOM1L1,CUBN,TSPAN1,FRK,EGF,SLCO4C1,SLC17A1,ATP6V0A4,ASS1,LRP2,ENPEP
GO: Cellular Component	GO:0000323	lytic vacuole			0.001717	0.8069	0.01834	0.1234	22	736	SLC17A3,ACP3,GPC4,FGFR3,ALDOB,SDC4,GOT1,ANK2,ANK3,ANPEP,HYAL1,TOM1L1,CUBN,TSPAN1,FRK,EGF,SLCO4C1,SLC17A1,ATP6V0A4,ASS1,LRP2,ENPEP
GO: Cellular Component	GO:0043296	apical junction complex			0.001772	0.833	0.01851	0.1246	8	148	AOC1,MAGI2,ANK3,CLDN7,CLDN10,CLDN8,TACSTD2,CDH1
GO: Cellular Component	GO:0036477	somatodendritic compartment			0.002164	1	0.02211	0.1489	29	1096	CHL1,PDE1A,LZTS3,PTGER3,DDC,MAGI2,MET,PPARGC1A,SERPINI1,CLU,PTPRO,HPN,PVALB,COBL,MME,CX3CL1,RAP1GAP,SORBS2,CALB1,RAB17,ANK3,ANXA3,SH3GL2,AQP1,CRYAB,SHANK2,ASS1,LRP2,GABRA2
GO: Cellular Component	GO:0005759	mitochondrial matrix			0.002406	1	0.02406	0.1619	16	478	RIDA,GLYAT,ERBB4,ACADL,ACADSB,ACAT1,HMGCS2,ACSM3,GLDC,AK4,ALDH6A1,ACSF2,ARG2,OGDHL,PCCA,PCK2
GO: Cellular Component	GO:0031091	platelet alpha granule			0.002597	1	0.02542	0.1711	6	92	CLU,FGB,PLG,KNG1,EGF,SERPINA5
GO: Cellular Component	GO:0005923	bicellular tight junction			0.002909	1	0.0279	0.1878	7	126	AOC1,MAGI2,ANK3,CLDN7,CLDN10,CLDN8,TACSTD2
GO: Cellular Component	GO:0044297	cell body			0.003032	1	0.02838	0.1911	23	820	PDE1A,PTGER3,DDC,MET,PPARGC1A,SERPINI1,HPN,PVALB,COBL,MME,CX3CL1,RAP1GAP,SORBS2,CALB1,RAB17,PODXL,ANXA3,SH3GL2,AQP1,CRYAB,SHANK2,ASS1,GABRA2
GO: Cellular Component	GO:0014704	intercalated disc			0.00308	1	0.02838	0.1911	5	66	ANK2,ANK3,SLC4A1,ATP1A1,ATP1B1
GO: Cellular Component	GO:0005587	collagen type IV trimer			0.003217	1	0.02908	0.1957	2	6	COL4A3,COL4A4
GO: Cellular Component	GO:0031093	platelet alpha granule lumen			0.003288	1	0.02916	0.1963	5	67	CLU,FGB,PLG,KNG1,EGF
GO: Cellular Component	GO:0044853	plasma membrane raft			0.003611	1	0.03143	0.2116	7	131	ERBB4,MAL,SLC22A6,AQP1,ATP1A1,ATP1B1,CDH1
GO: Cellular Component	GO:0070160	tight junction			0.003925	1	0.03296	0.2219	7	133	AOC1,MAGI2,ANK3,CLDN7,CLDN10,CLDN8,TACSTD2
GO: Cellular Component	GO:0043005	neuron projection			0.004026	1	0.03296	0.2219	38	1624	CHL1,PCP4,GAD1,LZTS3,PTGER3,DDC,MAGI2,MET,PPARGC1A,CLIC5,CLU,PTPRO,PVALB,COBL,MME,CX3CL1,GOT1,CA2,EPS8L2,RAP1GAP,NPY1R,SORBS2,CALB1,RAB17,ANK2,ANK3,ANXA3,SH3GL2,CRTAC1,MAP7,AQP1,CRYAB,SLC6A13,SHANK2,ASS1,LRP2,CDH1,GABRA2
GO: Cellular Component	GO:0031012	extracellular matrix			0.004102	1	0.03296	0.2219	18	598	AZGP1,CCN6,OLFML2A,CLU,SBSPON,GPC4,FGB,FGF1,FGF9,PLG,KNG1,COL4A3,COL4A4,ANXA3,P3H2,SLPI,MUC1,SERPINA5
GO: Cellular Component	GO:0016327	apicolateral plasma membrane			0.004138	1	0.03296	0.2219	3	22	KRT8,CLDN7,CLDN8
GO: Cellular Component	GO:0098533	ATPase dependent transmembrane transport complex			0.004138	1	0.03296	0.2219	3	22	ATP1A1,ATP1B1,FXYD2
GO: Cellular Component	GO:0005901	caveola			0.004333	1	0.03381	0.2276	6	102	ERBB4,SLC22A6,AQP1,ATP1A1,ATP1B1,CDH1
GO: Cellular Component	GO:0098642	network-forming collagen trimer			0.00446	1	0.03381	0.2276	2	7	COL4A3,COL4A4
GO: Cellular Component	GO:0098645	collagen network			0.00446	1	0.03381	0.2276	2	7	COL4A3,COL4A4
GO: Cellular Component	GO:0005794	Golgi apparatus			0.004871	1	0.03634	0.2446	38	1643	TMEM30B,MAL,GALNT3,ACP3,PERP,F2RL1,ABCB1,DEFB1,CLIC5,CLU,HPD,GPC4,RETREG1,ANGPTL3,UMOD,FGFR3,MME,RNF128,SDC4,GALNT14,RAP1GAP,ANK3,SH3GL2,TOM1L1,GRB14,CXCL14,CUBN,TFAP2A,CRYAB,ARSL,GALNT11,P3H2,MTTP,LRP2,ELF3,ATP1A1,MUC1,CDH1
GO: Cellular Component	GO:0098982	GABA-ergic synapse			0.005225	1	0.03837	0.2583	6	106	ERBB4,MAGI2,PTPRO,NR3C2,CALB1,GABRA2
GO: Cellular Component	GO:0062023	collagen-containing extracellular matrix			0.005431	1	0.03927	0.2643	15	474	AZGP1,CLU,SBSPON,GPC4,FGB,FGF9,PLG,KNG1,COL4A3,COL4A4,ANXA3,P3H2,SLPI,MUC1,SERPINA5
GO: Cellular Component	GO:0098651	basement membrane collagen trimer			0.005888	1	0.0413	0.278	2	8	COL4A3,COL4A4
GO: Cellular Component	GO:0034366	spherical high-density lipoprotein particle			0.005888	1	0.0413	0.278	2	8	APOM,CLU
GO: Cellular Component	GO:0030057	desmosome			0.005979	1	0.04133	0.2782	3	25	PERP,DSC1,PPL
GO: Cellular Component	GO:0030018	Z disc			0.006266	1	0.04268	0.2873	7	145	KRT8,SORBS2,ANK2,ANK3,NEBL,SLC4A1,CRYAB
GO: Cellular Component	GO:0097038	perinuclear endoplasmic reticulum			0.007439	1	0.04924	0.3314	3	27	CLU,NOX4,OSBPL3
GO: Cellular Component	GO:0034364	high-density lipoprotein particle			0.007439	1	0.04924	0.3314	3	27	APOM,CLU,LIPC
Human Phenotype	HP:0000121	Nephrocalcinosis			1.038e-07	0.0003369	0.0002525	0.002187	12	68	GALNT3,PTH1R,KL,CLCNKB,KCNJ1,COL4A3,COL4A4,SLC4A1,SLC12A1,SLC12A3,SLC34A1,ATP6V0A4
Human Phenotype	HP:0011042	Abnormal blood potassium concentration			1.556e-07	0.000505	0.0002525	0.002187	14	99	MET,CLCNKB,KCNJ1,NR3C2,HSD11B2,CA12,HNF1B,SLC2A2,SLC4A1,SLC12A1,SLC12A3,SLC34A1,EHHADH,FXYD2
Human Phenotype	HP:0002157	Azotemia			2.394e-07	0.0007769	0.000259	0.002243	20	209	SLC17A3,MET,UMOD,FGFR3,ALDOB,NR1H4,COL4A3,COL4A4,HNF1B,REN,SLC2A2,SLC3A1,SLC7A9,SLC22A5,ATP6V0A4,ASS1,MTTP,MUC1,PCCA,G6PC
Human Phenotype	HP:0004364	Abnormal circulating nitrogen compound concentration			3.271e-07	0.001061	0.0002653	0.002298	20	213	SLC17A3,MET,UMOD,FGFR3,ALDOB,NR1H4,COL4A3,COL4A4,HNF1B,REN,SLC2A2,SLC3A1,SLC7A9,SLC22A5,ATP6V0A4,ASS1,MTTP,MUC1,PCCA,G6PC
Human Phenotype	HP:0002900	Hypokalemia			4.309e-07	0.001398	0.0002797	0.002423	12	77	MET,CLCNKB,KCNJ1,HSD11B2,HNF1B,SLC2A2,SLC4A1,SLC12A1,SLC12A3,SLC34A1,EHHADH,FXYD2
Human Phenotype	HP:0002917	Hypomagnesemia			7.722e-07	0.002506	0.0004176	0.003618	7	22	CLCNKB,KCNJ1,HNF1B,SLC12A1,EGF,SLC12A3,FXYD2
Human Phenotype	HP:0000848	Increased circulating renin level			1.056e-06	0.003426	0.0004869	0.004218	6	15	CLCNKB,KCNJ1,NR3C2,HSD11B2,SLC12A1,SLC12A3
Human Phenotype	HP:0003111	Abnormal blood ion concentration			1.2e-06	0.003895	0.0004869	0.004218	26	366	GALNT3,GATA3,PTH1R,MET,KL,CLCNKB,KCNJ1,NR3C2,FGFR3,HSD11B2,ALDOB,CA12,COL4A3,COL4A4,HNF1B,NEBL,SLC2A2,SLC3A1,SLC4A1,SLC7A9,SLC12A1,EGF,SLC12A3,SLC34A1,EHHADH,FXYD2
Human Phenotype	HP:0002632	Low-to-normal blood pressure			2.038e-06	0.006614	0.0006624	0.005738	4	5	CLCNKB,KCNJ1,SLC12A1,SLC12A3
Human Phenotype	HP:0004921	Abnormal magnesium concentration			2.041e-06	0.006624	0.0006624	0.005738	7	25	CLCNKB,KCNJ1,HNF1B,SLC12A1,EGF,SLC12A3,FXYD2
Human Phenotype	HP:0011277	Abnormality of the urinary system physiology			2.363e-06	0.007667	0.000697	0.006038	50	1063	SOX9,HGD,ARHGAP24,GALNT3,SLC26A4,GATA3,GATM,PTH1R,CCN6,MET,PHYH,NPHS2,KL,CLCNKB,PTPRO,HPD,GLDC,KCNJ1,UMOD,FGFR3,PLG,ALDOB,CA2,COL4A3,COL4A4,HNF1B,NEBL,HYAL1,REN,CUBN,SLC2A2,SLC3A1,SLC4A1,SLC7A9,LHX1,SLC12A1,EGF,SLC12A3,SLC34A1,EHHADH,ATP6V0A4,ASS1,MTTP,LRP2,SLC4A4,FXYD2,MUC1,PCCA,G6PC,DCXR
Human Phenotype	HP:0010932	Abnormal circulating nucleobase concentration			3.455e-06	0.01121	0.0009204	0.007972	14	127	SLC17A3,UMOD,ALDOB,DPYS,HNF1B,REN,SLC2A2,SLC3A1,SLC7A9,ATP6V0A4,ASS1,MTTP,MUC1,G6PC
Human Phenotype	HP:0012591	Abnormal urinary electrolyte concentration			3.687e-06	0.01196	0.0009204	0.007972	15	146	PTH1R,CLCNKB,KCNJ1,ALDOB,HNF1B,SLC2A2,SLC3A1,SLC7A9,SLC12A1,EGF,SLC12A3,SLC34A1,EHHADH,FXYD2,MUC1
Human Phenotype	HP:0012607	Abnormal urine magnesium concentration			4.22e-06	0.0137	0.0009782	0.008474	5	11	CLCNKB,HNF1B,EGF,SLC12A3,FXYD2
Human Phenotype	HP:0011866	Abnormal urine anion concentration			4.903e-06	0.01591	0.001061	0.009188	13	113	PTH1R,PHYH,CLCNKB,KCNJ1,FGFR3,ALDOB,SLC2A2,SLC3A1,SLC7A9,SLC12A1,SLC34A1,EHHADH,MTTP
Human Phenotype	HP:0000128	Renal potassium wasting			5.993e-06	0.01945	0.001215	0.01053	4	6	CLCNKB,KCNJ1,SLC12A1,SLC12A3
Human Phenotype	HP:0000934	Chondrocalcinosis			1.358e-05	0.04406	0.002341	0.02027	6	22	CLCNKB,KCNJ1,HNF1B,SLC12A1,SLC12A3,FXYD2
Human Phenotype	HP:0003110	Abnormality of urine homeostasis			1.361e-05	0.04415	0.002341	0.02027	38	751	HGD,ARHGAP24,GATM,PTH1R,CCN6,MET,PHYH,NPHS2,CLCNKB,PTPRO,HPD,GLDC,KCNJ1,FGFR3,ALDOB,COL4A3,COL4A4,HNF1B,NEBL,HYAL1,CUBN,SLC2A2,SLC3A1,SLC7A9,SLC12A1,EGF,SLC12A3,SLC34A1,EHHADH,ATP6V0A4,ASS1,MTTP,LRP2,FXYD2,MUC1,PCCA,G6PC,DCXR
Human Phenotype	HP:0005567	Renal magnesium wasting			1.37e-05	0.04447	0.002341	0.02027	4	7	CLCNKB,HNF1B,SLC12A3,FXYD2
Human Phenotype	HP:0010930	Abnormal blood monovalent inorganic cation concentration			2.23e-05	0.07235	0.003617	0.03134	15	169	MET,CLCNKB,KCNJ1,NR3C2,HSD11B2,CA12,HNF1B,NEBL,SLC2A2,SLC4A1,SLC12A1,SLC12A3,SLC34A1,EHHADH,FXYD2
Human Phenotype	HP:0040084	Abnormal circulating renin			2.348e-05	0.0762	0.003628	0.03143	6	24	CLCNKB,KCNJ1,NR3C2,HSD11B2,SLC12A1,SLC12A3
Human Phenotype	HP:0100529	Abnormal blood phosphate concentration			2.582e-05	0.08379	0.003737	0.03237	11	95	GALNT3,PTH1R,MET,KL,FGFR3,ALDOB,COL4A3,COL4A4,SLC2A2,SLC34A1,EHHADH
Human Phenotype	HP:0004352	Abnormal circulating purine concentration			2.648e-05	0.08594	0.003737	0.03237	12	113	SLC17A3,UMOD,ALDOB,HNF1B,REN,SLC2A2,SLC3A1,SLC7A9,ATP6V0A4,MTTP,MUC1,G6PC
Human Phenotype	HP:0002149	Hyperuricemia			2.854e-05	0.0926	0.003858	0.03342	11	96	SLC17A3,UMOD,ALDOB,HNF1B,REN,SLC3A1,SLC7A9,ATP6V0A4,MTTP,MUC1,G6PC
Human Phenotype	HP:0012211	Abnormal renal physiology			3.72e-05	0.1207	0.004829	0.04183	38	784	SOX9,HGD,ARHGAP24,GALNT3,SLC26A4,GATA3,MET,PHYH,NPHS2,KL,CLCNKB,PTPRO,KCNJ1,UMOD,FGFR3,PLG,ALDOB,CA2,COL4A3,COL4A4,HNF1B,NEBL,REN,SLC2A2,SLC3A1,SLC4A1,SLC7A9,LHX1,SLC12A1,SLC12A3,SLC34A1,EHHADH,ATP6V0A4,MTTP,SLC4A4,FXYD2,MUC1,G6PC
Human Phenotype	HP:0000841	Hyperactive renin-angiotensin system			4.74e-05	0.1538	0.005778	0.05005	4	9	CLCNKB,KCNJ1,NR3C2,SLC12A1
Human Phenotype	HP:0011280	Abnormality of urine calcium concentration			4.807e-05	0.156	0.005778	0.05005	10	84	PTH1R,CLCNKB,KCNJ1,HNF1B,SLC3A1,SLC7A9,SLC12A1,SLC12A3,SLC34A1,FXYD2
Human Phenotype	HP:0004368	Increased purine level			5.543e-05	0.1799	0.006218	0.05387	11	103	SLC17A3,UMOD,ALDOB,HNF1B,REN,SLC3A1,SLC7A9,ATP6V0A4,MTTP,MUC1,G6PC
Human Phenotype	HP:0011865	Abnormal urine cation concentration			5.904e-05	0.1916	0.006218	0.05387	10	86	PTH1R,CLCNKB,KCNJ1,HNF1B,SLC3A1,SLC7A9,SLC12A1,SLC12A3,SLC34A1,FXYD2
Human Phenotype	HP:0000124	Renal tubular dysfunction			5.913e-05	0.1919	0.006218	0.05387	13	142	CLCNKB,FGFR3,ALDOB,CA2,SLC2A2,SLC3A1,SLC4A1,SLC7A9,SLC12A3,SLC34A1,EHHADH,ATP6V0A4,SLC4A4
Human Phenotype	HP:0004360	Abnormality of acid-base homeostasis			5.941e-05	0.1928	0.006218	0.05387	28	508	ACAT1,CCN6,MET,CLCNKB,HPD,GLDC,KCNJ1,NR3C2,FGFR3,HSD11B2,ALDOB,ALDH6A1,CA2,DPYS,SLC2A2,SLC3A1,SLC4A1,SLC7A9,SLC12A1,SLC12A3,SLC34A1,EHHADH,ATP6V0A4,ASS1,MTTP,SLC4A4,PCCA,G6PC
Human Phenotype	HP:0005959	Impaired gluconeogenesis			6.508e-05	0.2112	0.006599	0.05717	3	4	SLC22A5,PCK1,PCK2
Human Phenotype	HP:0100685	Abnormal Sharpey fiber morphology			7.458e-05	0.242	0.007334	0.06353	6	29	CLCNKB,KCNJ1,HNF1B,SLC12A1,SLC12A3,FXYD2
Human Phenotype	HP:0001960	Hypokalemic metabolic alkalosis			7.743e-05	0.2513	0.00739	0.06401	4	10	CLCNKB,KCNJ1,SLC12A1,SLC12A3
Human Phenotype	HP:0010929	Abnormal blood cation concentration			0.0001124	0.3647	0.01042	0.09026	21	338	GATA3,PTH1R,MET,CLCNKB,KCNJ1,NR3C2,FGFR3,HSD11B2,CA12,HNF1B,NEBL,SLC2A2,SLC3A1,SLC4A1,SLC7A9,SLC12A1,EGF,SLC12A3,SLC34A1,EHHADH,FXYD2
Human Phenotype	HP:0000847	Abnormality of renin-angiotensin system			0.0001336	0.4335	0.01184	0.1026	6	32	CLCNKB,KCNJ1,NR3C2,HSD11B2,SLC12A1,SLC12A3
Human Phenotype	HP:0000082	Abnormality of renal physiology			0.000135	0.4381	0.01184	0.1026	35	738	SOX9,HGD,ARHGAP24,GALNT3,GATA3,MET,PHYH,NPHS2,KL,CLCNKB,PTPRO,KCNJ1,UMOD,FGFR3,ALDOB,CA2,COL4A3,COL4A4,HNF1B,NEBL,REN,SLC2A2,SLC3A1,SLC4A1,SLC7A9,LHX1,SLC12A1,SLC12A3,SLC34A1,EHHADH,ATP6V0A4,MTTP,SLC4A4,FXYD2,MUC1
Human Phenotype	HP:0002148	Hypophosphatemia			0.0001647	0.5343	0.01406	0.1218	9	79	PTH1R,MET,FGFR3,ALDOB,COL4A3,COL4A4,SLC2A2,SLC34A1,EHHADH
Human Phenotype	HP:0003127	Hypocalciuria			0.0001753	0.569	0.01426	0.1236	4	12	CLCNKB,HNF1B,SLC12A3,FXYD2
Human Phenotype	HP:0010927	Abnormal blood inorganic cation concentration			0.0001758	0.5706	0.01426	0.1236	15	202	GATA3,PTH1R,MET,CLCNKB,KCNJ1,FGFR3,HNF1B,SLC3A1,SLC4A1,SLC7A9,SLC12A1,EGF,SLC12A3,SLC34A1,FXYD2
Human Phenotype	HP:0011026	Aplasia/Hypoplasia of the vagina			0.0001916	0.6219	0.01517	0.1314	5	22	SOX9,IRF6,HNF1B,LHX1,CYB5A
Human Phenotype	HP:0000859	Hyperaldosteronism			0.0002186	0.7093	0.0165	0.1429	7	49	CLCNKB,KCNJ1,NR3C2,HSD11B2,SLC12A1,SLC12A3,MTTP
Human Phenotype	HP:0002855	Abnormality of aldosterone production			0.0002186	0.7093	0.0165	0.1429	7	49	CLCNKB,KCNJ1,NR3C2,HSD11B2,SLC12A1,SLC12A3,MTTP
Human Phenotype	HP:0001949	Hypokalemic alkalosis			0.0002483	0.8056	0.0179	0.1551	4	13	CLCNKB,KCNJ1,SLC12A1,SLC12A3
Human Phenotype	HP:0012598	Abnormal urine potassium concentration			0.0002483	0.8056	0.0179	0.1551	4	13	CLCNKB,KCNJ1,SLC12A1,SLC12A3
Human Phenotype	HP:0000127	Renal salt wasting			0.000264	0.8566	0.01862	0.1613	6	36	CLCNKB,KCNJ1,SLC12A1,SLC12A3,SLC34A1,MUC1
Human Phenotype	HP:0002717	Adrenal overactivity			0.0002772	0.8994	0.01914	0.1658	8	67	CLCNKB,KCNJ1,NR3C2,HSD11B2,SLC12A1,SLC12A3,PDE8B,MTTP
Human Phenotype	HP:0012600	Abnormal urine chloride concentration			0.0003132	1	0.02013	0.1743	3	6	CLCNKB,KCNJ1,SLC12A1
Human Phenotype	HP:0003081	Increased urinary potassium			0.0003132	1	0.02013	0.1743	3	6	CLCNKB,KCNJ1,SLC12A1
Human Phenotype	HP:0002914	Hyperchloriduria			0.0003132	1	0.02013	0.1743	3	6	CLCNKB,KCNJ1,SLC12A1
Human Phenotype	HP:0011036	Abnormality of renal excretion			0.0003163	1	0.02013	0.1743	9	86	GALNT3,KL,CLCNKB,KCNJ1,REN,SLC12A1,SLC12A3,SLC34A1,MUC1
Human Phenotype	HP:0003324	Generalized muscle weakness			0.0003425	1	0.02137	0.1851	11	126	ERBB4,DAO,PPARGC1A,CLCNKB,KCNJ1,FGFR3,HNF1B,SLC12A1,EGF,SLC12A3,FXYD2
Human Phenotype	HP:0012575	Abnormal nephron morphology			0.0003753	1	0.02298	0.1991	26	507	SOX9,ARHGAP24,GATA3,NPHS2,PTPRO,KCNJ1,UMOD,FGFR3,ALDOB,CA2,COL4A3,COL4A4,HNF1B,NEBL,REN,CUBN,SLC3A1,SLC7A9,SLC12A1,SLC34A1,EHHADH,ATP6V0A4,MTTP,LRP2,MUC1,G6PC
Human Phenotype	HP:0004363	Abnormal circulating calcium concentration			0.0004611	1	0.02771	0.24	14	197	GATA3,PTH1R,MET,CLCNKB,KCNJ1,FGFR3,HNF1B,SLC3A1,SLC4A1,SLC7A9,SLC12A1,SLC12A3,SLC34A1,FXYD2
Human Phenotype	HP:0200114	Metabolic alkalosis			0.0004783	1	0.02822	0.2444	6	40	MET,CLCNKB,KCNJ1,HSD11B2,SLC12A1,SLC12A3
Human Phenotype	HP:0000091	Abnormal renal tubule morphology			0.0006221	1	0.03578	0.3099	22	410	ARHGAP24,NPHS2,PTPRO,UMOD,FGFR3,ALDOB,CA2,COL4A3,COL4A4,HNF1B,NEBL,REN,CUBN,SLC3A1,SLC7A9,SLC34A1,EHHADH,ATP6V0A4,MTTP,LRP2,MUC1,G6PC
Human Phenotype	HP:0002150	Hypercalciuria			0.0006607	1	0.03578	0.3099	8	76	PTH1R,CLCNKB,KCNJ1,SLC3A1,SLC7A9,SLC12A1,SLC12A3,SLC34A1
Human Phenotype	HP:0011741	Secondary hyperaldosteronism			0.000673	1	0.03578	0.3099	2	2	CLCNKB,SLC12A3
Human Phenotype	HP:0006584	Small abnormally formed scapulae			0.000673	1	0.03578	0.3099	2	2	SOX9,FGFR3
Human Phenotype	HP:0000420	Short nasal septum			0.000673	1	0.03578	0.3099	2	2	TFAP2A,ARSL
Human Phenotype	HP:0003648	Lacticaciduria			0.000673	1	0.03578	0.3099	2	2	SLC34A1,EHHADH
Human Phenotype	HP:0003355	Aminoaciduria			0.0006836	1	0.03578	0.3099	15	229	HGD,GATM,CCN6,PHYH,HPD,GLDC,ALDOB,SLC2A2,SLC3A1,SLC7A9,SLC34A1,EHHADH,ASS1,MTTP,PCCA
Human Phenotype	HP:0000849	Adrenocortical abnormality			0.0007188	1	0.03703	0.3207	9	96	SOX9,CLCNKB,KCNJ1,NR3C2,HSD11B2,SLC12A1,SLC12A3,PDE8B,MTTP
Human Phenotype	HP:0010909	Abnormal circulating arginine concentration			0.0008445	1	0.04282	0.3709	3	8	SLC3A1,SLC7A9,ASS1
Human Phenotype	HP:0004337	Abnormality of amino acid metabolism			0.0008674	1	0.0433	0.3751	17	285	HGD,GATM,IRF6,CCN6,PHYH,HPD,GLDC,ALDOB,SLC2A2,SLC3A1,SLC7A9,SLC34A1,EHHADH,ASS1,MTTP,PCCA,CYB5A
Human Phenotype	HP:0001948	Alkalosis			0.0009323	1	0.04584	0.397	8	80	MET,CLCNKB,KCNJ1,FGFR3,HSD11B2,SLC12A1,SLC12A3,ASS1
Mouse Phenotype	MP:0009643	abnormal urine homeostasis			1.26e-26	5.294e-23	5.294e-23	4.723e-22	55	484	HGD,CRIM1,MAOB,SLC26A4,GATM,PTGER3,DDC,BHMT,MAGI2,SLC22A6,TFCP2L1,NPHS2,KL,CLIC5,CLU,HPD,GLDC,KCNJ1,PVALB,DIO1,UMOD,NR3C2,VAV3,HSD11B2,CA2,RHCG,NPHS1,COL4A4,NPR3,A1CF,SOSTDC1,REN,CLDN7,CUBN,AQP1,AQP3,TFAP2B,CLDN10,CLDN8,SLC3A1,SLC4A1,SLC7A9,SLC12A1,SLC12A3,SLC13A1,SLC14A1,SLC34A1,PDE8B,SLC22A2,SLC22A5,ATP6V0A4,LRP2,SLC4A4,PCCA,G6PC
Mouse Phenotype	MP:0005502	abnormal renal/urinary system physiology			2.528e-24	1.062e-20	5.31e-21	4.737e-20	64	742	SOX9,HGD,GALNT3,CRIM1,MAOB,SLC26A4,GATM,PTGER3,F2RL1,DDC,BHMT,MAGI2,MET,SLC22A6,TFCP2L1,NPHS2,KL,CLIC5,CLU,PTPRO,HPD,GLDC,KCNJ1,PVALB,DIO1,UMOD,NR3C2,VAV3,HSD11B2,CA2,RHCG,NPHS1,COL4A4,KRT7,NPR3,A1CF,PODXL,SOSTDC1,NOX4,REN,CLDN7,CUBN,AQP1,AQP3,TFAP2B,CLDN10,CLDN8,SLC3A1,SLC4A1,SLC7A9,SLC12A1,SLC12A3,SLC13A1,SLC14A1,SLC15A2,SLC34A1,PDE8B,SLC22A2,SLC22A5,ATP6V0A4,LRP2,SLC4A4,PCCA,G6PC
Mouse Phenotype	MP:0005367	renal/urinary system phenotype			2.151e-20	9.038e-17	3.013e-17	2.687e-16	82	1400	SOX9,HGD,TMEM30B,IMPA2,GALNT3,CRIM1,MAOB,SLC26A4,ESRRG,GATA3,GATM,PTGER3,F2RL1,DDC,BHMT,MAGI2,MET,PPARGC1A,SLC22A6,TFCP2L1,NPHS2,KL,CLIC5,CLU,PTPRO,HPD,GLDC,KCNJ1,PVALB,DIO1,UMOD,NR3C2,VAV3,FGFR3,HSD11B2,PLG,HSD17B2,SDC4,CA2,RHCG,NPHS1,COL4A4,KRT7,HNF1B,NPR3,A1CF,ANK3,PODXL,RBP4,SOSTDC1,CXCL14,NOX4,REN,CLDN7,CUBN,AQP1,AQP3,TFAP2B,CLDN10,CLDN8,PPL,SLC3A1,SLC4A1,SLC7A9,LHX1,ACE2,SLC12A1,SLC12A3,SLC…
Mouse Phenotype	MP:0002136	abnormal kidney physiology			4.94e-15	2.075e-11	5.188e-12	4.628e-11	39	443	HGD,GALNT3,CRIM1,PTGER3,F2RL1,DDC,MAGI2,MET,NPHS2,CLIC5,PTPRO,KCNJ1,PVALB,UMOD,NR3C2,VAV3,CA2,RHCG,COL4A4,SOSTDC1,NOX4,REN,CUBN,AQP1,AQP3,TFAP2B,CLDN10,SLC3A1,SLC4A1,SLC7A9,SLC12A1,SLC12A3,SLC13A1,SLC14A1,SLC15A2,SLC34A1,SLC22A5,LRP2,SLC4A4
Mouse Phenotype	MP:0000516	abnormal renal/urinary system morphology			1.579e-13	6.633e-10	1.327e-10	1.183e-09	62	1141	SOX9,HGD,TMEM30B,IMPA2,GALNT3,CRIM1,ESRRG,GATA3,F2RL1,DDC,MAGI2,MET,PPARGC1A,TFCP2L1,NPHS2,KL,CLIC5,CLU,PTPRO,GLDC,KCNJ1,PVALB,UMOD,NR3C2,VAV3,FGFR3,HSD11B2,PLG,HSD17B2,SDC4,CA2,RHCG,NPHS1,COL4A4,HNF1B,ANK3,PODXL,RBP4,SOSTDC1,CXCL14,REN,CLDN7,CUBN,TFAP2B,CLDN10,CLDN8,PPL,SLC3A1,SLC4A1,SLC7A9,LHX1,ACE2,SLC12A1,SLC12A3,SLC34A1,ATP6V0A4,LRP2,SLC4A4,EMX2,PCCA,G6PC,CDH6
Mouse Phenotype	MP:0002135	abnormal kidney morphology			3.804e-13	1.598e-09	2.664e-10	2.376e-09	58	1038	HGD,IMPA2,GALNT3,CRIM1,ESRRG,F2RL1,DDC,MAGI2,MET,PPARGC1A,TFCP2L1,NPHS2,KL,CLIC5,CLU,PTPRO,GLDC,KCNJ1,PVALB,UMOD,NR3C2,VAV3,HSD11B2,PLG,HSD17B2,SDC4,CA2,RHCG,NPHS1,COL4A4,HNF1B,ANK3,PODXL,RBP4,SOSTDC1,CXCL14,REN,CLDN7,CUBN,TFAP2B,CLDN10,CLDN8,PPL,SLC3A1,SLC4A1,SLC7A9,LHX1,ACE2,SLC12A1,SLC12A3,SLC34A1,ATP6V0A4,LRP2,SLC4A4,EMX2,PCCA,G6PC,CDH6
Mouse Phenotype	MP:0005332	abnormal amino acid level			9.912e-12	4.164e-08	5.949e-09	5.306e-08	32	387	HGD,GAD1,DDAH1,ACADL,GATM,DAO,ALDH1L1,DDC,BHMT,MAGI2,NPHS2,HPD,UMOD,HSD11B2,COL4A4,SOSTDC1,SLC13A3,REN,AQP3,TFAP2B,SLC3A1,ARG2,SLC7A9,SLC6A13,RGN,SLC12A1,SLC14A1,SLC22A5,ASPA,ASS1,PCCA,PCK1
Mouse Phenotype	MP:0001756	abnormal urination			1.39e-10	5.84e-07	7.3e-08	6.512e-07	20	166	MAGI2,TFCP2L1,KCNJ1,UMOD,NR3C2,VAV3,HSD11B2,NPR3,PODXL,REN,AQP1,AQP3,CLDN10,CLDN8,SLC3A1,SLC4A1,SLC12A1,SLC14A1,ATP6V0A4,PCCA
Mouse Phenotype	MP:0002118	abnormal lipid homeostasis			1.267e-09	5.324e-06	5.916e-07	5.277e-06	60	1337	EPHX2,PDE1A,GALNT3,ACADL,AZGP1,PDZK1,HLF,GATM,DDC,FABP1,BHMT,APOM,PPARGC1A,PHYH,NPHS2,KL,HPGD,HPN,ANGPTL3,DIO1,UMOD,NR3C2,VAV3,HSD11B2,PLG,CX3CL1,NR1H4,KRT7,HNF1B,NPR1,A1CF,NPY1R,FMO5,ANK2,CXCL14,REN,CLDN7,SERPINA6,AQP1,AQP3,CLDN8,SLC2A2,SLC3A1,RGN,LIPC,SLC10A2,SHANK2,SLC13A1,SLC34A1,EHHADH,PDE8B,OSBPL3,ASPA,MTTP,LRP2,ATP1A1,SLC4A4,MUC1,G6PC,PCK1
Mouse Phenotype	MP:0003881	abnormal nephron morphology			1.494e-09	6.275e-06	6.208e-07	5.538e-06	34	524	HGD,CRIM1,ESRRG,F2RL1,MAGI2,MET,TFCP2L1,NPHS2,CLIC5,CLU,PTPRO,PVALB,UMOD,NR3C2,HSD11B2,HSD17B2,SDC4,NPHS1,COL4A4,HNF1B,PODXL,SOSTDC1,REN,TFAP2B,SLC3A1,SLC7A9,LHX1,SLC12A1,SLC12A3,ATP6V0A4,SLC4A4,PCCA,G6PC,CDH6
Mouse Phenotype	MP:0001762	polyuria			1.626e-09	6.829e-06	6.208e-07	5.538e-06	15	101	TFCP2L1,KCNJ1,UMOD,NR3C2,HSD11B2,NPR3,REN,AQP1,AQP3,CLDN10,CLDN8,SLC4A1,SLC12A1,SLC14A1,ATP6V0A4
Mouse Phenotype	MP:0001547	abnormal lipid level			1.831e-09	7.694e-06	6.412e-07	5.719e-06	58	1280	EPHX2,PDE1A,GALNT3,ACADL,PDZK1,HLF,GATM,DDC,FABP1,BHMT,APOM,PPARGC1A,PHYH,NPHS2,KL,HPGD,HPN,ANGPTL3,DIO1,UMOD,NR3C2,VAV3,HSD11B2,PLG,CX3CL1,NR1H4,KRT7,HNF1B,NPR1,A1CF,NPY1R,FMO5,ANK2,CXCL14,REN,CLDN7,SERPINA6,AQP1,AQP3,CLDN8,SLC2A2,SLC3A1,RGN,LIPC,SLC10A2,SHANK2,SLC13A1,SLC34A1,EHHADH,PDE8B,OSBPL3,ASPA,MTTP,LRP2,ATP1A1,SLC4A4,G6PC,PCK1
Mouse Phenotype	MP:0003014	abnormal kidney medulla morphology			2.063e-09	8.668e-06	6.668e-07	5.948e-06	13	73	CRIM1,ESRRG,KL,UMOD,HSD17B2,SDC4,RHCG,NPHS1,REN,SLC3A1,SLC4A1,LHX1,SLC12A1
Mouse Phenotype	MP:0000230	abnormal systemic arterial blood pressure			3.455e-09	1.451e-05	9.695e-07	8.648e-06	23	263	EPHX2,DDAH1,HLF,F2RL1,DDC,NPHS2,KCNJ1,PVALB,UMOD,NR3C2,VAV3,HSD11B2,NPR1,NPR3,A1CF,PODXL,SOSTDC1,REN,CLDN8,ACE2,SLC12A1,SLC12A3,FOLH1B
Mouse Phenotype	MP:0002987	abnormal urine osmolality			3.462e-09	1.454e-05	9.695e-07	8.648e-06	13	76	PTGER3,KCNJ1,UMOD,NPR3,REN,AQP1,AQP3,TFAP2B,CLDN10,SLC4A1,SLC12A1,SLC14A1,SLC4A4
Mouse Phenotype	MP:0010107	abnormal renal reabsorption			4.836e-09	2.031e-05	1.27e-06	1.133e-05	10	40	NR3C2,CUBN,CLDN10,SLC12A1,SLC13A1,SLC15A2,SLC34A1,SLC22A5,LRP2,SLC4A4
Mouse Phenotype	MP:0002988	decreased urine osmolality			6.83e-09	2.869e-05	1.688e-06	1.505e-05	12	66	KCNJ1,UMOD,NPR3,REN,AQP1,AQP3,TFAP2B,CLDN10,SLC4A1,SLC12A1,SLC14A1,SLC4A4
Mouse Phenotype	MP:0009348	abnormal urine pH			9.316e-09	3.914e-05	2.174e-06	1.94e-05	9	32	SLC26A4,UMOD,CA2,RHCG,CLDN10,SLC4A1,ATP6V0A4,SLC4A4,G6PC
Mouse Phenotype	MP:0020887	abnormal potassium level			1.472e-08	6.184e-05	3.141e-06	2.802e-05	16	136	GATM,TFCP2L1,PVALB,UMOD,NR3C2,VAV3,HSD11B2,CA2,RHCG,REN,CLDN7,CLDN10,CLDN8,SLC12A1,P3H2,ATP6V0A4
Mouse Phenotype	MP:0011978	abnormal potassium ion homeostasis			1.637e-08	6.877e-05	3.141e-06	2.802e-05	16	137	GATM,TFCP2L1,PVALB,UMOD,NR3C2,VAV3,HSD11B2,CA2,RHCG,REN,CLDN7,CLDN10,CLDN8,SLC12A1,P3H2,ATP6V0A4
Mouse Phenotype	MP:0003372	abnormal circulating mineralocorticoid level			1.665e-08	6.996e-05	3.141e-06	2.802e-05	10	45	HLF,DDC,NR3C2,VAV3,HSD11B2,NPR1,REN,CLDN7,CLDN8,SLC4A4
Mouse Phenotype	MP:0005346	abnormal circulating aldosterone level			1.665e-08	6.996e-05	3.141e-06	2.802e-05	10	45	HLF,DDC,NR3C2,VAV3,HSD11B2,NPR1,REN,CLDN7,CLDN8,SLC4A4
Mouse Phenotype	MP:0005311	abnormal circulating amino acid level			1.72e-08	7.225e-05	3.141e-06	2.802e-05	24	310	HGD,DDAH1,ACADL,DAO,DDC,MAGI2,NPHS2,HPD,UMOD,COL4A4,SOSTDC1,SLC13A3,REN,AQP3,TFAP2B,SLC3A1,ARG2,SLC7A9,RGN,SLC12A1,SLC22A5,ASS1,PCCA,PCK1
Mouse Phenotype	MP:0001429	dehydration			1.871e-08	7.859e-05	3.275e-06	2.921e-05	14	103	GAD1,SPINK1,F2RL1,KL,KCNJ1,NR3C2,FGFR3,NPR3,REN,CLDN7,AQP1,SLC4A1,ATP6V0A4,PCCA
Mouse Phenotype	MP:0002843	decreased systemic arterial blood pressure			2.061e-08	8.656e-05	3.463e-06	3.089e-05	15	121	EPHX2,HLF,DDC,KCNJ1,UMOD,NR3C2,NPR1,NPR3,A1CF,SOSTDC1,REN,CLDN8,ACE2,SLC12A1,SLC12A3
Mouse Phenotype	MP:0013285	abnormal renal filtration			3.233e-08	0.0001358	5.224e-06	4.66e-05	11	61	CRIM1,MAGI2,NPHS2,PTPRO,KCNJ1,UMOD,VAV3,REN,SLC4A1,SLC12A1,SLC14A1
Mouse Phenotype	MP:0002703	abnormal renal tubule morphology			3.464e-08	0.0001455	5.39e-06	4.808e-05	23	297	HGD,CRIM1,MAGI2,TFCP2L1,NPHS2,UMOD,NR3C2,HSD11B2,HSD17B2,SDC4,NPHS1,COL4A4,HNF1B,SOSTDC1,REN,TFAP2B,SLC3A1,SLC7A9,SLC12A1,SLC12A3,ATP6V0A4,SLC4A4,G6PC
Mouse Phenotype	MP:0006274	abnormal urine sodium level			3.861e-08	0.0001622	5.793e-06	5.168e-05	11	62	TFCP2L1,UMOD,NR3C2,VAV3,HSD11B2,CLDN7,AQP1,CLDN8,SLC12A1,SLC12A3,SLC4A4
Mouse Phenotype	MP:0011415	abnormal aldosterone level			4.907e-08	0.0002061	7.108e-06	6.341e-05	10	50	HLF,DDC,NR3C2,VAV3,HSD11B2,NPR1,REN,CLDN7,CLDN8,SLC4A4
Mouse Phenotype	MP:0003031	acidosis			6.22e-08	0.0002613	8.71e-06	7.77e-05	9	39	KCNJ1,PVALB,CA2,RHCG,REN,SLC4A1,SLC12A1,ATP6V0A4,SLC4A4
Mouse Phenotype	MP:0003197	nephrocalcinosis			7.563e-08	0.0003177	1.025e-05	9.143e-05	8	29	GALNT3,KL,UMOD,CLDN10,SLC4A1,SLC12A1,SLC34A1,ATP6V0A4
Mouse Phenotype	MP:0002985	abnormal urine calcium level			9.927e-08	0.000417	1.303e-05	0.0001163	9	41	KL,UMOD,TFAP2B,CLDN10,SLC4A1,SLC12A1,SLC12A3,SLC34A1,SLC4A4
Mouse Phenotype	MP:0004820	abnormal urine potassium level			1.241e-07	0.0005215	1.58e-05	0.000141	9	42	TFCP2L1,PVALB,UMOD,VAV3,HSD11B2,CLDN7,CLDN10,CLDN8,SLC12A1
Mouse Phenotype	MP:0030604	abnormal ammonia homeostasis			1.342e-07	0.0005639	1.659e-05	0.0001479	8	31	SLC26A4,UMOD,RHCG,SLC22A5,ASS1,SLC4A4,PCCA,PCK1
Mouse Phenotype	MP:0001544	abnormal cardiovascular system physiology			1.497e-07	0.0006288	1.784e-05	0.0001592	67	1784	TSPAN12,EPHX2,SOX9,ERBB3,ERBB4,DDAH1,CRIM1,MAOA,ESRRG,HLF,GATA3,MECOM,PTGER3,F2RL1,DDC,PTH1R,MET,PPARGC1A,NPHS2,KL,CLIC5,CLU,PTPRO,GLDC,KCNJ1,HPGD,PVALB,UMOD,FGF9,NR3C2,VAV3,HSD11B2,PLG,ALDOB,BBOX1,GOT1,KRT8,NPR1,NPR3,A1CF,NPY1R,SORBS2,ANK2,ANPEP,PODXL,GPX3,RBP4,SOSTDC1,NOX4,REN,SLC44A4,AQP1,AQP3,TFAP2B,CLDN8,SLC4A1,ACE2,EFNA1,SLC12A1,SLC12A3,MTTP,FOLH1B,ATP1A1,SLC4A4,ATP1B1,PCCA,GABRA2
Mouse Phenotype	MP:0004043	abnormal pH regulation			1.529e-07	0.0006424	1.784e-05	0.0001592	10	56	KCNJ1,PVALB,CA2,RHCG,REN,CLDN8,SLC4A1,SLC12A1,ATP6V0A4,SLC4A4
Mouse Phenotype	MP:0012551	metabolic acidosis			1.702e-07	0.000715	1.932e-05	0.0001724	7	22	KCNJ1,PVALB,CA2,REN,SLC4A1,SLC12A1,SLC4A4
Mouse Phenotype	MP:0000519	hydronephrosis			1.833e-07	0.00077	2.026e-05	0.0001808	14	123	IMPA2,CRIM1,MET,GLDC,KCNJ1,UMOD,HNF1B,REN,SLC3A1,SLC7A9,LHX1,SLC12A1,ATP6V0A4,LRP2
Mouse Phenotype	MP:0004194	abnormal kidney pelvis morphology			3.683e-07	0.001547	3.967e-05	0.0003538	15	150	IMPA2,CRIM1,ESRRG,MET,GLDC,KCNJ1,UMOD,HNF1B,REN,SLC3A1,SLC7A9,LHX1,SLC12A1,ATP6V0A4,LRP2
Mouse Phenotype	MP:0006357	abnormal circulating mineral level			3.917e-07	0.001645	4.113e-05	0.0003669	29	506	RIDA,GALNT3,GATM,PTH1R,KL,KCNJ1,PVALB,TOX3,FGB,UMOD,NR3C2,HSD11B2,CA2,RHCG,KRT7,NOX4,REN,TFAP2B,CLDN10,CLDN8,SLC4A1,SLC12A1,SLC12A3,SLC13A1,SLC34A1,P3H2,ATP6V0A4,LRP2,SLC4A4
Mouse Phenotype	MP:0008997	increased blood osmolality			4.422e-07	0.001858	4.531e-05	0.0004041	6	16	UMOD,AQP1,AQP3,SLC2A2,SLC4A1,ATP6V0A4
Mouse Phenotype	MP:0005581	abnormal renin activity			4.554e-07	0.001913	4.555e-05	0.0004064	7	25	CRIM1,DDC,PVALB,NR3C2,VAV3,REN,SLC12A1
Mouse Phenotype	MP:0002705	dilated renal tubules			4.859e-07	0.002041	4.747e-05	0.0004235	14	133	HGD,CRIM1,TFCP2L1,NPHS2,HSD11B2,SDC4,NPHS1,COL4A4,REN,TFAP2B,SLC3A1,SLC7A9,SLC4A4,G6PC
Mouse Phenotype	MP:0006264	decreased systemic arterial systolic blood pressure			6.057e-07	0.002545	5.783e-05	0.0005159	9	50	EPHX2,DDC,UMOD,NR3C2,NPR1,A1CF,SOSTDC1,REN,SLC12A1
Mouse Phenotype	MP:0003949	abnormal circulating lipid level			6.408e-07	0.002692	5.983e-05	0.0005337	45	1036	PDE1A,ACADL,PDZK1,HLF,GATM,DDC,BHMT,APOM,PPARGC1A,PHYH,NPHS2,HPN,ANGPTL3,DIO1,UMOD,NR3C2,VAV3,HSD11B2,PLG,CX3CL1,NR1H4,KRT7,HNF1B,NPR1,A1CF,NPY1R,FMO5,ANK2,CXCL14,REN,CLDN7,SERPINA6,AQP1,AQP3,CLDN8,SLC3A1,LIPC,SLC10A2,SHANK2,OSBPL3,MTTP,ATP1A1,SLC4A4,G6PC,PCK1
Mouse Phenotype	MP:0009350	decreased urine pH			6.718e-07	0.002822	6.135e-05	0.0005473	6	17	SLC26A4,UMOD,CLDN10,ATP6V0A4,SLC4A4,G6PC
Mouse Phenotype	MP:0000192	abnormal mineral level			7.135e-07	0.002997	6.297e-05	0.0005617	31	581	RIDA,GALNT3,GATM,PTH1R,KL,KCNJ1,PVALB,TOX3,FGB,UMOD,NR3C2,HSD11B2,CA2,RHCG,KRT7,A1CF,GPX3,NOX4,REN,TFAP2B,CLDN10,CLDN8,SLC4A1,SLC12A1,SLC12A3,SLC13A1,SLC34A1,P3H2,ATP6V0A4,LRP2,SLC4A4
Mouse Phenotype	MP:0009644	uremia			7.195e-07	0.003023	6.297e-05	0.0005617	21	299	DDC,MAGI2,NPHS2,UMOD,SDC4,COL4A4,SOSTDC1,SLC13A3,REN,CLDN7,AQP3,TFAP2B,CLDN10,SLC3A1,SLC4A1,SLC12A1,SLC16A4,SLC14A1,ATP6V0A4,SLC4A4,PCK1
Mouse Phenotype	MP:0005584	abnormal enzyme/coenzyme activity			8.69e-07	0.003651	7.45e-05	0.0006646	20	277	GAD1,DDAH1,GALNT3,CRIM1,DDC,KL,PVALB,ANGPTL3,UMOD,NR3C2,VAV3,GPX3,REN,ACE2,RGN,SLC12A1,SLC13A1,ASS1,LRP2,PCCA
Mouse Phenotype	MP:0005636	abnormal mineral homeostasis			1.066e-06	0.004478	8.956e-05	0.0007989	31	592	RIDA,GALNT3,GATM,PTH1R,KL,KCNJ1,PVALB,TOX3,FGB,UMOD,NR3C2,HSD11B2,CA2,RHCG,KRT7,A1CF,GPX3,NOX4,REN,TFAP2B,CLDN10,CLDN8,SLC4A1,SLC12A1,SLC12A3,SLC13A1,SLC34A1,P3H2,ATP6V0A4,LRP2,SLC4A4
Mouse Phenotype	MP:0001765	abnormal ion homeostasis			1.375e-06	0.005776	0.0001068	0.0009526	35	726	RIDA,GALNT3,GATM,PTH1R,SLC22A6,TFCP2L1,KL,KCNJ1,PVALB,TOX3,FGB,UMOD,NR3C2,VAV3,HSD11B2,CA2,RHCG,KRT7,A1CF,NOX4,REN,CLDN7,AQP1,TFAP2B,CLDN10,CLDN8,SLC4A1,SLC12A1,SLC12A3,SLC34A1,P3H2,SLC22A2,ATP6V0A4,LRP2,SLC4A4
Mouse Phenotype	MP:0003373	increased circulating mineralocorticoid level			1.38e-06	0.005797	0.0001068	0.0009526	7	29	NR3C2,VAV3,NPR1,REN,CLDN7,CLDN8,SLC4A4
Mouse Phenotype	MP:0005556	abnormal renal filtration rate			1.38e-06	0.005797	0.0001068	0.0009526	7	29	CRIM1,NPHS2,UMOD,VAV3,SLC4A1,SLC12A1,SLC14A1
Mouse Phenotype	MP:0002666	increased circulating aldosterone level			1.38e-06	0.005797	0.0001068	0.0009526	7	29	NR3C2,VAV3,NPR1,REN,CLDN7,CLDN8,SLC4A4
Mouse Phenotype	MP:0011468	abnormal urine amino acid level			1.408e-06	0.005913	0.0001068	0.0009526	9	55	GATM,NPHS2,UMOD,HSD11B2,SLC3A1,SLC7A9,SLC12A1,SLC14A1,SLC22A5
Mouse Phenotype	MP:0008996	abnormal blood osmolality			1.423e-06	0.00598	0.0001068	0.0009526	6	19	UMOD,AQP1,AQP3,SLC2A2,SLC4A1,ATP6V0A4
Mouse Phenotype	MP:0006316	increased urine sodium level			1.769e-06	0.007432	0.0001304	0.001163	7	30	TFCP2L1,UMOD,NR3C2,CLDN7,CLDN8,SLC12A1,SLC4A4
Mouse Phenotype	MP:0004757	abnormal distal convoluted tubule morphology			1.999e-06	0.008399	0.0001448	0.001292	6	20	TFCP2L1,NR3C2,HSD11B2,NPHS1,REN,SLC12A3
Mouse Phenotype	MP:0005565	increased blood urea nitrogen level			2.226e-06	0.009349	0.0001585	0.001414	17	219	MAGI2,NPHS2,UMOD,SDC4,COL4A4,SOSTDC1,REN,CLDN7,AQP3,TFAP2B,CLDN10,SLC4A1,SLC12A1,SLC16A4,SLC14A1,ATP6V0A4,PCK1
Mouse Phenotype	MP:0002989	small kidney			2.291e-06	0.009625	0.0001604	0.001431	19	269	CRIM1,MAGI2,TFCP2L1,NPHS2,KL,UMOD,HSD17B2,COL4A4,SOSTDC1,CXCL14,REN,TFAP2B,PPL,SLC3A1,SLC4A1,LHX1,SLC4A4,EMX2,G6PC
Mouse Phenotype	MP:0005400	abnormal vitamin level			2.593e-06	0.01089	0.0001785	0.001593	9	59	GALNT3,ALDH1L1,KL,GLDC,RBP4,CUBN,RGN,SLC34A1,LRP2
Mouse Phenotype	MP:0002706	abnormal kidney size			2.721e-06	0.01143	0.0001843	0.001644	24	408	CRIM1,DDC,MAGI2,PPARGC1A,TFCP2L1,NPHS2,KL,UMOD,HSD11B2,PLG,HSD17B2,NPHS1,COL4A4,SOSTDC1,CXCL14,REN,TFAP2B,PPL,SLC3A1,SLC4A1,LHX1,SLC4A4,EMX2,G6PC
Mouse Phenotype	MP:0004754	abnormal kidney collecting duct morphology			3.247e-06	0.01364	0.0002165	0.001931	10	77	TFCP2L1,KL,UMOD,HSD17B2,CA2,RHCG,ANK3,CLDN8,SLC4A4,PCCA
Mouse Phenotype	MP:0003953	abnormal hormone level			3.641e-06	0.01529	0.0002364	0.002109	45	1104	ERBB3,GALNT3,MAOA,MAOB,HLF,GATA3,GATM,PTGER3,DDC,PTH1R,FABP1,APOM,MET,PPARGC1A,KL,CLIC5,HPGD,HPN,DIO1,NR3C2,VAV3,HSD11B2,NR1H4,NPR1,A1CF,NPY1R,ANK2,CXCL14,REN,CLDN7,SERPINA6,TFAP2B,CLDN8,SLC2A2,ACE2,FRK,LIPC,SLC12A1,SLC13A1,SLC34A1,PDE8B,C21orf62,LRP2,ATP1A1,SLC4A4
Mouse Phenotype	MP:0003985	renal fibrosis			3.658e-06	0.01537	0.0002364	0.002109	11	96	CRIM1,MAGI2,NPHS2,KL,CLU,UMOD,VAV3,NPHS1,COL4A4,SOSTDC1,REN
Mouse Phenotype	MP:0002204	abnormal neurotransmitter level			4.016e-06	0.01687	0.0002556	0.00228	15	181	GAD1,ERBB3,MAOA,MAOB,HLF,GATA3,DAO,ALDH1L1,DDC,BHMT,KL,VAV3,A1CF,ASPA,PCCA
Mouse Phenotype	MP:0011346	renal tubule atrophy			4.362e-06	0.01833	0.0002735	0.00244	7	34	MAGI2,NPHS2,COL4A4,SOSTDC1,REN,SLC4A4,G6PC
Mouse Phenotype	MP:0004019	abnormal vitamin homeostasis			5.204e-06	0.02186	0.0003215	0.002868	9	64	GALNT3,ALDH1L1,KL,GLDC,RBP4,CUBN,RGN,SLC34A1,LRP2
Mouse Phenotype	MP:0005265	abnormal blood urea nitrogen level			5.348e-06	0.02247	0.0003256	0.002905	19	285	PDE1A,MAGI2,NPHS2,PVALB,UMOD,SDC4,COL4A4,SOSTDC1,REN,CLDN7,AQP3,TFAP2B,CLDN10,SLC4A1,SLC12A1,SLC16A4,SLC14A1,ATP6V0A4,PCK1
Mouse Phenotype	MP:0009641	kidney degeneration			5.602e-06	0.02353	0.0003362	0.002999	8	49	CRIM1,NPHS2,KL,UMOD,HSD17B2,SDC4,SLC7A9,CDH6
Mouse Phenotype	MP:0011941	increased fluid intake			6.031e-06	0.02534	0.0003569	0.003183	11	101	KCNJ1,UMOD,NR1H4,NPR3,NPY1R,REN,AQP3,CLDN10,SLC12A1,SLC14A1,ATP6V0A4
Mouse Phenotype	MP:0005619	increased urine potassium level			6.486e-06	0.02725	0.0003784	0.003376	6	24	TFCP2L1,UMOD,CLDN7,CLDN10,CLDN8,SLC12A1
Mouse Phenotype	MP:0004970	kidney atrophy			6.752e-06	0.02836	0.0003886	0.003466	9	66	MAGI2,NPHS2,COL4A4,SOSTDC1,REN,SLC3A1,SLC4A1,SLC4A4,G6PC
Mouse Phenotype	MP:0002871	albuminuria			7.22e-06	0.03033	0.0004099	0.003656	10	84	CRIM1,DDC,MAGI2,NPHS2,CLIC5,NPHS1,COL4A4,SOSTDC1,CUBN,LRP2
Mouse Phenotype	MP:0006325	impaired hearing			8.132e-06	0.03416	0.0004555	0.004063	16	216	SLC26A4,ESRRG,GATA3,MECOM,KL,CLIC5,HPN,FGF9,FGFR3,PLS1,COL4A4,EPS8L2,TFAP2A,ATP6V0A4,LRP2,EMX2
Mouse Phenotype	MP:0012224	abnormal sterol level			9.232e-06	0.03878	0.0005103	0.004552	32	690	GALNT3,PDZK1,GATM,BHMT,APOM,PPARGC1A,PHYH,NPHS2,KL,HPN,ANGPTL3,DIO1,UMOD,PLG,CX3CL1,NR1H4,KRT7,HNF1B,A1CF,FMO5,CXCL14,AQP1,AQP3,SLC2A2,SLC3A1,RGN,LIPC,SLC10A2,SLC34A1,MTTP,LRP2,G6PC
Mouse Phenotype	MP:0002668	abnormal circulating potassium level			9.652e-06	0.04055	0.0005266	0.004698	11	106	GATM,PVALB,UMOD,NR3C2,HSD11B2,CA2,RHCG,REN,CLDN8,P3H2,ATP6V0A4
Mouse Phenotype	MP:0011085	postnatal lethality, complete penetrance			1.278e-05	0.05368	0.0006882	0.006139	31	668	SOX9,ERBB3,ERBB4,CRIM1,SPINK1,ESRRG,PERP,MECOM,IRF6,MAGI2,PPARGC1A,NPHS2,NR3C2,NPHS1,HNF1B,ANK2,ANK3,REN,CLDN7,AQP1,TFAP2A,TFAP2B,SLC2A2,SLC4A1,SLC12A1,SLC14A1,SLC4A4,ATP1B1,EMX2,PCCA,PCK1
Mouse Phenotype	MP:0003349	abnormal circulating renin level			1.355e-05	0.05694	0.0007208	0.00643	6	27	NR3C2,VAV3,NPR1,REN,SLC12A1,SLC4A4
Mouse Phenotype	MP:0005418	abnormal circulating hormone level			1.736e-05	0.07292	0.0009115	0.008131	40	990	GALNT3,MAOA,HLF,GATM,PTGER3,DDC,PTH1R,FABP1,APOM,MET,PPARGC1A,KL,CLIC5,HPGD,DIO1,NR3C2,VAV3,HSD11B2,NR1H4,NPR1,A1CF,NPY1R,ANK2,CXCL14,REN,CLDN7,SERPINA6,TFAP2B,CLDN8,SLC2A2,FRK,LIPC,SLC12A1,SLC13A1,SLC34A1,PDE8B,C21orf62,LRP2,ATP1A1,SLC4A4
Mouse Phenotype	MP:0005441	increased urine calcium level			2.103e-05	0.08833	0.00109	0.009728	6	29	KL,UMOD,SLC4A1,SLC12A1,SLC34A1,SLC4A4
Mouse Phenotype	MP:0002082	postnatal lethality			2.255e-05	0.09472	0.001152	0.01028	51	1412	SOX9,ERBB3,ERBB4,CRIM1,ACADL,SPINK1,ESRRG,PERP,MECOM,IRF6,DNAJC6,F2RL1,MAGI2,PPARGC1A,TFCP2L1,NPHS2,GLDC,KCNJ1,FGF9,NR3C2,FGFR3,HSD11B2,NPHS1,HNF1B,NPR3,A1CF,SORBS2,ANK2,ANK3,REN,CLDN7,CUBN,AQP1,TFAP2A,TFAP2B,SLC2A2,SLC4A1,SHANK2,SLC12A1,SLC14A1,SLC34A1,EHHADH,ATP6V0A4,ASS1,ELF3,SLC4A4,ATP1B1,EMX2,PCCA,PCK1,GABRA2
Mouse Phenotype	MP:0009809	abnormal urine uric acid level			2.276e-05	0.09563	0.001152	0.01028	5	18	SLC22A6,UMOD,A1CF,SLC12A1,G6PC
Mouse Phenotype	MP:0001596	hypotension			2.584e-05	0.1086	0.001277	0.01139	6	30	HLF,NPR1,NPR3,REN,CLDN8,ACE2
Mouse Phenotype	MP:0011469	abnormal urine creatinine level			2.584e-05	0.1086	0.001277	0.01139	6	30	GATM,NPHS2,UMOD,HSD11B2,SLC12A1,SLC14A1
Mouse Phenotype	MP:0005528	decreased renal glomerular filtration rate			3.038e-05	0.1276	0.00147	0.01311	5	19	CRIM1,PTPRO,KCNJ1,UMOD,REN
Mouse Phenotype	MP:0001426	polydipsia			3.044e-05	0.1279	0.00147	0.01311	7	45	KCNJ1,NPR3,REN,AQP3,CLDN10,SLC12A1,ATP6V0A4
Mouse Phenotype	MP:0002903	abnormal circulating parathyroid hormone level			3.15e-05	0.1323	0.001472	0.01313	6	31	GALNT3,PTH1R,KL,TFAP2B,SLC34A1,LRP2
Mouse Phenotype	MP:0011734	abnormal urine ammonia level			3.154e-05	0.1325	0.001472	0.01313	4	10	SLC26A4,UMOD,RHCG,SLC4A4
Mouse Phenotype	MP:0011424	decreased urine uric acid level			3.154e-05	0.1325	0.001472	0.01313	4	10	SLC22A6,UMOD,A1CF,SLC12A1
Mouse Phenotype	MP:0005553	increased circulating creatinine level			3.334e-05	0.1401	0.001539	0.01373	12	143	DDC,MAGI2,NPHS2,UMOD,COL4A4,SOSTDC1,SLC13A3,REN,AQP3,TFAP2B,SLC3A1,SLC12A1
Mouse Phenotype	MP:0001562	abnormal circulating calcium level			3.573e-05	0.1501	0.001632	0.01456	12	144	GALNT3,PTH1R,KL,TOX3,UMOD,KRT7,NOX4,TFAP2B,SLC12A1,SLC34A1,LRP2,SLC4A4
Mouse Phenotype	MP:0001846	increased inflammatory response			4.223e-05	0.1774	0.001908	0.01702	43	1140	SOX9,HGD,ERBB3,ERBB4,CRIM1,SLC26A4,PERP,GATM,MECOM,PTGER3,F2RL1,DDC,MAGI2,MET,PPARGC1A,PHYH,KL,CLU,UMOD,PIP5K1B,MME,PLG,RNF128,ALDOB,PLS1,NR1H4,CA2,COL4A4,HNF1B,A1CF,DSC1,HYAL1,SOSTDC1,REN,SERPINA6,AQP3,LGALS2,SLC3A1,SLC7A9,ACE2,SLC12A1,EGF,SLPI
Mouse Phenotype	MP:0030663	abnormal arginine level			4.878e-05	0.2049	0.00218	0.01945	4	11	SLC3A1,ARG2,SLC7A9,ASS1
Mouse Phenotype	MP:0006317	decreased urine sodium level			5.469e-05	0.2298	0.002393	0.02135	6	34	UMOD,VAV3,HSD11B2,AQP1,SLC12A1,SLC12A3
Mouse Phenotype	MP:0003946	renal necrosis			5.469e-05	0.2298	0.002393	0.02135	6	34	CRIM1,NPHS2,KL,UMOD,SLC7A9,CDH6
Mouse Phenotype	MP:0011497	abnormal glomerular capsule visceral layer morphology			6.47e-05	0.2718	0.002741	0.02445	9	87	CRIM1,MAGI2,NPHS2,CLIC5,PTPRO,NPHS1,COL4A4,PODXL,G6PC
Mouse Phenotype	MP:0005326	abnormal podocyte morphology			6.47e-05	0.2718	0.002741	0.02445	9	87	CRIM1,MAGI2,NPHS2,CLIC5,PTPRO,NPHS1,COL4A4,PODXL,G6PC
Mouse Phenotype	MP:0020879	abnormal calcium level			6.484e-05	0.2724	0.002741	0.02445	12	153	GALNT3,PTH1R,KL,TOX3,UMOD,KRT7,NOX4,TFAP2B,SLC12A1,SLC34A1,LRP2,SLC4A4
Mouse Phenotype	MP:0001629	abnormal heart rate			6.554e-05	0.2753	0.002741	0.02445	18	312	ERBB4,DDAH1,DDC,PPARGC1A,KL,VAV3,BBOX1,GOT1,A1CF,NPY1R,SORBS2,ANK2,REN,SLC44A4,SLC4A1,ACE2,EFNA1,GABRA2
Mouse Phenotype	MP:0011947	abnormal fluid intake			6.591e-05	0.2769	0.002741	0.02445	11	130	KCNJ1,UMOD,NR1H4,NPR3,NPY1R,REN,AQP3,CLDN10,SLC12A1,SLC14A1,ATP6V0A4
Mouse Phenotype	MP:0013284	abnormal renal glomerular filtration			7.657e-05	0.3217	0.003154	0.02813	6	36	CRIM1,MAGI2,PTPRO,KCNJ1,UMOD,REN
Mouse Phenotype	MP:0030721	increased lysine level			8.01e-05	0.3365	0.003201	0.02855	3	5	SLC3A1,SLC7A9,PCCA
Mouse Phenotype	MP:0002829	abnormal juxtaglomerular apparatus morphology			8.01e-05	0.3365	0.003201	0.02855	3	5	UMOD,NR3C2,REN
Mouse Phenotype	MP:0030647	increased ornithine level			8.01e-05	0.3365	0.003201	0.02855	3	5	SLC3A1,SLC7A9,ASS1
Mouse Phenotype	MP:0008059	abnormal podocyte foot process morphology			8.134e-05	0.3417	0.003201	0.02855	8	70	CRIM1,MAGI2,NPHS2,CLIC5,PTPRO,NPHS1,COL4A4,PODXL
Mouse Phenotype	MP:0011458	abnormal urine chloride ion level			8.229e-05	0.3457	0.003201	0.02855	5	23	TFCP2L1,UMOD,CLDN7,CLDN8,SLC12A3
Mouse Phenotype	MP:0011471	decreased urine creatinine level			8.229e-05	0.3457	0.003201	0.02855	5	23	GATM,UMOD,HSD11B2,SLC12A1,SLC14A1
Mouse Phenotype	MP:0001859	kidney inflammation			8.626e-05	0.3624	0.003325	0.02966	14	208	HGD,CRIM1,F2RL1,DDC,MAGI2,MET,UMOD,CA2,COL4A4,SOSTDC1,REN,SLC3A1,SLC7A9,SLC12A1
Mouse Phenotype	MP:0000194	increased circulating calcium level			9.009e-05	0.3785	0.003441	0.03069	8	71	GALNT3,PTH1R,KL,UMOD,NOX4,SLC12A1,SLC34A1,SLC4A4
Mouse Phenotype	MP:0001565	abnormal circulating phosphate level			9.728e-05	0.4087	0.003682	0.03284	10	113	GALNT3,GATM,PTH1R,KL,FGB,UMOD,TFAP2B,CLDN10,SLC4A1,SLC34A1
Mouse Phenotype	MP:0011405	tubulointerstitial nephritis			0.0001022	0.4295	0.003739	0.03335	5	24	DDC,MAGI2,COL4A4,SLC3A1,SLC7A9
Mouse Phenotype	MP:0002905	decreased circulating parathyroid hormone level			0.0001024	0.43	0.003739	0.03335	4	13	GALNT3,PTH1R,KL,SLC34A1
Mouse Phenotype	MP:0005582	increased renin activity			0.0001024	0.43	0.003739	0.03335	4	13	DDC,NR3C2,VAV3,SLC12A1
Mouse Phenotype	MP:0011454	abnormal glomerular endothelium fenestra morphology			0.0001024	0.43	0.003739	0.03335	4	13	CRIM1,MAGI2,NPHS2,CLIC5
Mouse Phenotype	MP:0020885	abnormal phosphate level			0.0001048	0.4401	0.003794	0.03385	10	114	GALNT3,GATM,PTH1R,KL,FGB,UMOD,TFAP2B,CLDN10,SLC4A1,SLC34A1
Mouse Phenotype	MP:0004231	abnormal calcium ion homeostasis			0.0001058	0.4443	0.003797	0.03388	14	212	GALNT3,PTH1R,KL,TOX3,UMOD,KRT7,A1CF,NOX4,TFAP2B,CLDN10,SLC12A1,SLC34A1,LRP2,SLC4A4
Mouse Phenotype	MP:0011762	renal/urinary system inflammation			0.0001354	0.569	0.004822	0.04301	14	217	HGD,CRIM1,F2RL1,DDC,MAGI2,MET,UMOD,CA2,COL4A4,SOSTDC1,REN,SLC3A1,SLC7A9,SLC12A1
Mouse Phenotype	MP:0012007	abnormal chloride level			0.0001398	0.5873	0.004896	0.04368	10	118	TFCP2L1,PVALB,UMOD,HSD11B2,CLDN7,CLDN8,SLC4A1,SLC12A1,SLC12A3,ATP6V0A4
Mouse Phenotype	MP:0011843	abnormal kidney collecting duct epithelium morphology			0.000141	0.5924	0.004896	0.04368	4	14	TFCP2L1,HSD17B2,CA2,ANK3
Mouse Phenotype	MP:0011459	increased urine chloride ion level			0.000141	0.5924	0.004896	0.04368	4	14	TFCP2L1,UMOD,CLDN7,CLDN8
Mouse Phenotype	MP:0030720	abnormal lysine level			0.0001578	0.6629	0.005376	0.04796	3	6	SLC3A1,SLC7A9,PCCA
Mouse Phenotype	MP:0030664	increased arginine level			0.0001578	0.6629	0.005376	0.04796	3	6	SLC3A1,ARG2,SLC7A9
Mouse Phenotype	MP:0020889	abnormal sodium level			0.0001588	0.6673	0.005376	0.04796	12	168	TFCP2L1,KCNJ1,UMOD,NR3C2,VAV3,HSD11B2,CLDN7,AQP1,CLDN8,SLC12A1,SLC12A3,SLC4A4
Mouse Phenotype	MP:0001845	abnormal inflammatory response			0.00016	0.672	0.005376	0.04796	46	1324	SOX9,HGD,ERBB3,ERBB4,CRIM1,SLC26A4,PERP,GATM,MECOM,PTGER3,F2RL1,DDC,MAGI2,MET,PPARGC1A,PHYH,KL,CLU,UMOD,PIP5K1B,MME,PLG,RNF128,ALDOB,CX3CL1,PLS1,NR1H4,IL17RB,CA2,COL4A4,HNF1B,A1CF,NPY1R,DSC1,HYAL1,SOSTDC1,REN,SERPINA6,AQP3,LGALS2,SLC3A1,SLC7A9,ACE2,SLC12A1,EGF,SLPI
Mouse Phenotype	MP:0011977	abnormal sodium ion homeostasis			0.000168	0.7056	0.0056	0.04996	12	169	TFCP2L1,KCNJ1,UMOD,NR3C2,VAV3,HSD11B2,CLDN7,AQP1,CLDN8,SLC12A1,SLC12A3,SLC4A4
Mouse Phenotype	MP:0004085	abnormal heartbeat			0.0001781	0.7481	0.005891	0.05255	19	368	ERBB4,DDAH1,DDC,PPARGC1A,KL,VAV3,BBOX1,GOT1,A1CF,NPY1R,SORBS2,ANK2,REN,SLC44A4,SLC4A1,ACE2,EFNA1,PCCA,GABRA2
Mouse Phenotype	MP:0002827	abnormal renal corpuscle morphology			0.0001844	0.7747	0.006017	0.05368	19	369	CRIM1,ESRRG,F2RL1,MAGI2,MET,NPHS2,CLIC5,CLU,PTPRO,UMOD,NR3C2,NPHS1,COL4A4,PODXL,SOSTDC1,REN,SLC3A1,LHX1,G6PC
Mouse Phenotype	MP:0012575	increased noradrenaline level			0.0001848	0.7762	0.006017	0.05368	5	27	MAOA,MAOB,KL,VAV3,A1CF
Mouse Phenotype	MP:0011465	abnormal urine urea nitrogen level			0.0001893	0.7951	0.006085	0.05428	4	15	UMOD,CLDN10,SLC12A1,SLC14A1
Mouse Phenotype	MP:0000521	abnormal kidney cortex morphology			0.0001908	0.8015	0.006085	0.05428	20	401	CRIM1,ESRRG,F2RL1,MAGI2,MET,NPHS2,KL,CLIC5,CLU,PTPRO,UMOD,NR3C2,NPHS1,COL4A4,PODXL,SOSTDC1,REN,SLC3A1,LHX1,G6PC
Mouse Phenotype	MP:0002628	hepatic steatosis			0.0001912	0.8033	0.006085	0.05428	15	252	BHMT,MET,PPARGC1A,PHYH,ALDOB,NR1H4,KRT8,ANK2,RGN,EHHADH,SLC22A5,MTTP,PCCA,G6PC,PCK1
Mouse Phenotype	MP:0006315	abnormal urine protein level			0.0001976	0.8301	0.006242	0.05568	13	198	CRIM1,DDC,MAGI2,NPHS2,CLIC5,UMOD,NPHS1,COL4A4,SOSTDC1,CUBN,PDE8B,LRP2,G6PC
Mouse Phenotype	MP:0005325	abnormal renal glomerulus morphology			0.0002164	0.9089	0.006783	0.06051	18	343	CRIM1,ESRRG,F2RL1,MAGI2,MET,NPHS2,CLIC5,CLU,PTPRO,UMOD,NR3C2,NPHS1,COL4A4,SOSTDC1,REN,SLC3A1,LHX1,G6PC
Mouse Phenotype	MP:0003947	abnormal cholesterol level			0.0002284	0.9596	0.007108	0.06341	28	673	PDZK1,GATM,BHMT,APOM,PPARGC1A,PHYH,NPHS2,HPN,ANGPTL3,DIO1,UMOD,PLG,CX3CL1,NR1H4,KRT7,HNF1B,A1CF,FMO5,CXCL14,AQP1,AQP3,SLC2A2,SLC3A1,RGN,LIPC,SLC10A2,MTTP,G6PC
Mouse Phenotype	MP:0001963	abnormal hearing physiology			0.0002684	1	0.00829	0.07395	22	476	TMEM30B,SLC26A4,ESRRG,GATA3,MECOM,ALDH1L1,TYRP1,KL,CLIC5,HPN,FGF9,FGFR3,PLS1,COL4A4,EPS8L2,NPR3,TFAP2A,RGN,ATP6V0A4,ASPA,LRP2,EMX2
Mouse Phenotype	MP:0030646	abnormal ornithine level			0.000272	1	0.008307	0.0741	3	7	SLC3A1,SLC7A9,ASS1
Mouse Phenotype	MP:0002828	abnormal renal glomerular capsule morphology			0.0002729	1	0.008307	0.0741	10	128	CRIM1,MAGI2,NPHS2,CLIC5,PTPRO,UMOD,NPHS1,COL4A4,PODXL,G6PC
Mouse Phenotype	MP:0005278	abnormal cholesterol homeostasis			0.0002773	1	0.008381	0.07477	28	681	PDZK1,GATM,BHMT,APOM,PPARGC1A,PHYH,NPHS2,HPN,ANGPTL3,DIO1,UMOD,PLG,CX3CL1,NR1H4,KRT7,HNF1B,A1CF,FMO5,CXCL14,AQP1,AQP3,SLC2A2,SLC3A1,RGN,LIPC,SLC10A2,MTTP,G6PC
Mouse Phenotype	MP:0009763	increased sensitivity to induced morbidity/mortality			0.0002868	1	0.008606	0.07677	18	351	GATM,MECOM,F2RL1,PPARGC1A,KL,PLCL1,PLG,ALDOB,NR1H4,RHCG,NPR1,GPX3,AQP3,SLC4A1,ACE2,RGN,SLPI,ATP1B1
Mouse Phenotype	MP:0006335	abnormal hearing electrophysiology			0.0002996	1	0.008894	0.07934	20	415	TMEM30B,SLC26A4,ESRRG,GATA3,ALDH1L1,TYRP1,CLIC5,HPN,FGF9,FGFR3,PLS1,COL4A4,EPS8L2,NPR3,TFAP2A,RGN,ATP6V0A4,ASPA,LRP2,EMX2
Mouse Phenotype	MP:0003215	renal interstitial fibrosis			0.0003006	1	0.008894	0.07934	7	64	CRIM1,MAGI2,NPHS2,UMOD,COL4A4,SOSTDC1,REN
Mouse Phenotype	MP:0001784	abnormal fluid regulation			0.0003074	1	0.008931	0.07967	34	902	SOX9,GAD1,CRIM1,SPINK1,PDZK1,GATA3,MECOM,PTGER3,F2RL1,PTH1R,KL,CLU,KCNJ1,FGB,NR3C2,FGFR3,MME,TBX2,NPHS1,NPR1,NPR3,A1CF,DSC1,PODXL,REN,CLDN7,AQP1,SLC4A1,ACE2,SLC12A1,ATP6V0A4,SLC4A4,CDH1,PCCA
Mouse Phenotype	MP:0001731	abnormal postnatal growth			0.0003084	1	0.008931	0.07967	38	1052	SOX9,ERBB3,GALNT3,SPINK1,GATA3,MECOM,DDC,PTH1R,BHMT,MAGI2,MET,TFCP2L1,KL,KCNJ1,FGF9,FGFR3,PLG,HSD17B2,CA2,HNF1B,NPY1R,FMO5,SH3GL2,CLDN7,AQP1,TFAP2B,SLC4A1,MSRA,SLC12A1,EGF,SLC13A1,SLC14A1,SLC34A1,SLC22A5,SLC4A4,PCCA,G6PC,PCK1
Mouse Phenotype	MP:0002847	abnormal renal glomerular filtration rate			0.0003104	1	0.008931	0.07967	5	30	CRIM1,PTPRO,KCNJ1,UMOD,REN
Mouse Phenotype	MP:0004193	abnormal kidney papilla morphology			0.0003104	1	0.008931	0.07967	5	30	CRIM1,ESRRG,UMOD,REN,SLC12A1
Mouse Phenotype	MP:0001422	abnormal drinking behavior			0.0003149	1	0.008995	0.08024	11	155	KCNJ1,UMOD,NR1H4,NPR3,NPY1R,REN,AQP3,CLDN10,SLC12A1,SLC14A1,ATP6V0A4
Mouse Phenotype	MP:0002069	abnormal consumption behavior			0.0003169	1	0.008995	0.08024	29	722	GAD1,MAOA,ESRRG,GATM,PPARGC1A,CLIC5,KCNJ1,UMOD,FGF9,FGFR3,HSD11B2,NR1H4,NPR3,NPY1R,FMO5,SH3GL2,CXCL14,REN,AQP3,CLDN10,SLC12A1,SLC14A1,SLC34A1,EHHADH,ATP6V0A4,ASPA,FOLH1B,PCCA,PCK1
Mouse Phenotype	MP:0000180	abnormal circulating cholesterol level			0.0003265	1	0.009205	0.08211	26	618	PDZK1,GATM,BHMT,APOM,PPARGC1A,PHYH,NPHS2,HPN,ANGPTL3,DIO1,UMOD,PLG,CX3CL1,NR1H4,KRT7,HNF1B,A1CF,FMO5,CXCL14,AQP1,AQP3,SLC3A1,LIPC,SLC10A2,MTTP,G6PC
Mouse Phenotype	MP:0003964	abnormal noradrenaline level			0.0003312	1	0.009275	0.08274	7	65	ERBB3,MAOA,MAOB,DDC,KL,VAV3,A1CF
Mouse Phenotype	MP:0001732	postnatal growth retardation			0.0003937	1	0.0108	0.09631	37	1027	SOX9,ERBB3,GALNT3,SPINK1,GATA3,MECOM,DDC,PTH1R,BHMT,MAGI2,MET,TFCP2L1,KL,KCNJ1,FGF9,FGFR3,PLG,HSD17B2,CA2,HNF1B,NPY1R,FMO5,SH3GL2,CLDN7,AQP1,TFAP2B,SLC4A1,MSRA,SLC12A1,EGF,SLC13A1,SLC14A1,SLC34A1,SLC22A5,SLC4A4,PCCA,G6PC
Mouse Phenotype	MP:0011402	renal cast			0.0003938	1	0.0108	0.09631	6	48	MAGI2,NPHS2,COL4A4,SOSTDC1,SLC7A9,PCCA
Mouse Phenotype	MP:0003352	increased circulating renin level			0.0004044	1	0.0108	0.09631	4	18	NR3C2,VAV3,SLC12A1,SLC4A4
Mouse Phenotype	MP:0003374	decreased circulating mineralocorticoid level			0.0004044	1	0.0108	0.09631	4	18	HLF,DDC,HSD11B2,REN
Mouse Phenotype	MP:0002667	decreased circulating aldosterone level			0.0004044	1	0.0108	0.09631	4	18	HLF,DDC,HSD11B2,REN
Mouse Phenotype	MP:0003878	abnormal ear physiology			0.0004062	1	0.0108	0.09631	23	524	TMEM30B,SLC26A4,ESRRG,GATA3,MECOM,ALDH1L1,TYRP1,KL,CLIC5,HPN,FGF9,FGFR3,PLS1,COL4A4,EPS8L2,NPR3,CALB1,TFAP2A,RGN,ATP6V0A4,ASPA,LRP2,EMX2
Mouse Phenotype	MP:0004705	elongated vertebral body			0.0004189	1	0.0108	0.09631	2	2	FGFR3,NPR3
Mouse Phenotype	MP:0011754	abnormal kidney collecting duct intercalated cell morphology			0.0004189	1	0.0108	0.09631	2	2	TFCP2L1,CA2
Mouse Phenotype	MP:0020402	ornithinuria			0.0004189	1	0.0108	0.09631	2	2	SLC3A1,SLC7A9
Mouse Phenotype	MP:0020403	lysinuria			0.0004189	1	0.0108	0.09631	2	2	SLC3A1,SLC7A9
Mouse Phenotype	MP:0006121	calcified mitral valve			0.0004189	1	0.0108	0.09631	2	2	SOX9,KL
Mouse Phenotype	MP:0011299	abnormal macula densa morphology			0.0004189	1	0.0108	0.09631	2	2	NR3C2,REN
Mouse Phenotype	MP:0011296	decreased tubuloglomerular feedback response			0.0004189	1	0.0108	0.09631	2	2	KCNJ1,SLC12A1
Mouse Phenotype	MP:0005264	glomerulosclerosis			0.0004721	1	0.01209	0.1079	8	90	CRIM1,MAGI2,NPHS2,UMOD,NPHS1,COL4A4,SOSTDC1,REN
Mouse Phenotype	MP:0005318	decreased triglyceride level			0.0004772	1	0.01215	0.1084	17	335	PDE1A,GATM,FABP1,APOM,PPARGC1A,PHYH,HPN,ANGPTL3,UMOD,A1CF,FMO5,CXCL14,AQP3,SLC2A2,SHANK2,MTTP,PCK1
Mouse Phenotype	MP:0004192	abnormal kidney pyramid morphology			0.000492	1	0.01245	0.1111	5	33	CRIM1,ESRRG,UMOD,REN,SLC12A1
Mouse Phenotype	MP:0008060	abnormal podocyte slit diaphragm morphology			0.0005042	1	0.01253	0.1118	4	19	MAGI2,NPHS2,NPHS1,PODXL
Mouse Phenotype	MP:0011753	decreased podocyte number			0.0005042	1	0.01253	0.1118	4	19	CRIM1,MAGI2,NPHS2,NPHS1
Mouse Phenotype	MP:0003015	abnormal circulating bicarbonate level			0.0005042	1	0.01253	0.1118	4	19	SLC26A4,CA2,CLDN8,SLC4A1
Mouse Phenotype	MP:0011425	abnormal kidney interstitium morphology			0.0005235	1	0.01294	0.1154	7	70	CRIM1,MAGI2,NPHS2,UMOD,COL4A4,SOSTDC1,REN
Mouse Phenotype	MP:0005106	abnormal incus morphology			0.0005674	1	0.01394	0.1243	5	34	SOX9,KL,FGFR3,TFAP2A,EMX2
Mouse Phenotype	MP:0020148	abnormal sensitivity to induced morbidity/mortality			0.0005791	1	0.01415	0.1262	21	470	GATM,MECOM,F2RL1,PPARGC1A,KL,PLCL1,PLG,ALDOB,NR1H4,RHCG,NPR1,NPY1R,GPX3,SOSTDC1,NOX4,AQP3,SLC4A1,ACE2,RGN,SLPI,ATP1B1
Mouse Phenotype	MP:0002608	increased hematocrit			0.0005888	1	0.0143	0.1275	8	93	TMEM30B,KCNJ1,NR3C2,NPR3,CLDN7,AQP1,SLC12A1,SLC14A1
Mouse Phenotype	MP:0013716	hypolactation			0.0006202	1	0.01464	0.1306	4	20	ERBB3,ERBB4,EGF,CDH1
Mouse Phenotype	MP:0008062	abnormal podocyte slit junction morphology			0.0006202	1	0.01464	0.1306	4	20	MAGI2,NPHS2,NPHS1,PODXL
Mouse Phenotype	MP:0005308	abnormal circulating ammonia level			0.0006202	1	0.01464	0.1306	4	20	SLC22A5,ASS1,PCCA,PCK1
Mouse Phenotype	MP:0005309	increased circulating ammonia level			0.0006202	1	0.01464	0.1306	4	20	SLC22A5,ASS1,PCCA,PCK1
Mouse Phenotype	MP:0005360	urolithiasis			0.0006202	1	0.01464	0.1306	4	20	UMOD,SLC3A1,SLC7A9,ATP6V0A4
Mouse Phenotype	MP:0009645	crystalluria			0.0006334	1	0.01478	0.1319	3	9	UMOD,SLC3A1,SLC7A9
Mouse Phenotype	MP:0011470	increased urine creatinine level			0.0006334	1	0.01478	0.1319	3	9	NPHS2,UMOD,SLC12A1
Mouse Phenotype	MP:0006270	abnormal mammary gland growth during lactation			0.0006511	1	0.01511	0.1348	5	35	ERBB3,ERBB4,GATA3,PLG,CDH1
Mouse Phenotype	MP:0000316	cellular necrosis			0.0006562	1	0.01515	0.1351	15	283	CRIM1,NPHS2,KL,UMOD,MME,PLG,NR1H4,HNF1B,NPR1,SLC7A9,CRYAB,LHX1,MTTP,G6PC,CDH6
Mouse Phenotype	MP:0000530	abnormal kidney blood vessel morphology			0.0006789	1	0.01558	0.139	8	95	CRIM1,MAGI2,NPHS2,CLIC5,CLU,PLG,REN,TFAP2B
Mouse Phenotype	MP:0011967	increased or absent threshold for auditory brainstem response			0.0006876	1	0.01566	0.1397	17	346	TMEM30B,SLC26A4,ESRRG,GATA3,ALDH1L1,CLIC5,HPN,FGF9,FGFR3,PLS1,COL4A4,EPS8L2,NPR3,RGN,ATP6V0A4,ASPA,LRP2
Mouse Phenotype	MP:0002842	increased systemic arterial blood pressure			0.0006895	1	0.01566	0.1397	11	170	DDAH1,DDC,NPHS2,PVALB,UMOD,VAV3,HSD11B2,NPR1,PODXL,ACE2,FOLH1B
Mouse Phenotype	MP:0002707	abnormal kidney weight			0.0007354	1	0.01661	0.1482	10	145	DDC,PPARGC1A,UMOD,HSD17B2,NPHS1,CXCL14,REN,SLC3A1,SLC4A4,G6PC
Mouse Phenotype	MP:0008140	podocyte foot process effacement			0.0008269	1	0.01858	0.1657	6	55	CRIM1,MAGI2,NPHS2,CLIC5,NPHS1,COL4A4
Mouse Phenotype	MP:0004740	sensorineural hearing loss			0.000846	1	0.0188	0.1677	5	37	SLC26A4,GATA3,FGFR3,COL4A4,EMX2
Mouse Phenotype	MP:0006329	sensorineural hearing impairment			0.000846	1	0.0188	0.1677	5	37	SLC26A4,GATA3,FGFR3,COL4A4,EMX2
Mouse Phenotype	MP:0000231	hypertension			0.0008615	1	0.01905	0.1699	7	76	DDC,PVALB,UMOD,VAV3,HSD11B2,NPR1,ACE2
Mouse Phenotype	MP:0003353	decreased circulating renin level			0.0008914	1	0.01915	0.1708	3	10	NPR1,REN,SLC12A1
Mouse Phenotype	MP:0008061	absent podocyte slit diaphragm			0.0008914	1	0.01915	0.1708	3	10	NPHS2,NPHS1,PODXL
Mouse Phenotype	MP:0030636	decreased taurine level			0.0008914	1	0.01915	0.1708	3	10	DAO,SLC6A13,ASS1
Mouse Phenotype	MP:0004417	decreased cochlear nerve compound action potential			0.0008914	1	0.01915	0.1708	3	10	EPS8L2,TFAP2A,EMX2
Mouse Phenotype	MP:0011304	kidney papillary atrophy			0.0008914	1	0.01915	0.1708	3	10	CRIM1,REN,SLC12A1
Mouse Phenotype	MP:0011417	abnormal renal transport			0.0009071	1	0.01915	0.1708	4	22	NR3C2,AQP3,SLC12A1,SLC12A3
Mouse Phenotype	MP:0011434	abnormal urine magnesium level			0.0009071	1	0.01915	0.1708	4	22	UMOD,CLDN10,SLC12A1,G6PC
Mouse Phenotype	MP:0011228	abnormal vitamin D level			0.0009071	1	0.01915	0.1708	4	22	GALNT3,KL,SLC34A1,LRP2
Mouse Phenotype	MP:0004154	renal tubular necrosis			0.0009071	1	0.01915	0.1708	4	22	CRIM1,NPHS2,UMOD,SLC7A9
Mouse Phenotype	MP:0004774	abnormal bile salt level			0.001081	1	0.0226	0.2016	5	39	NR1H4,SLC2A2,SLC10A2,SLC13A1,EHHADH
Mouse Phenotype	MP:0005085	abnormal gallbladder physiology			0.001081	1	0.0226	0.2016	5	39	ACADL,F2RL1,NR1H4,SLC10A2,MUC1
Mouse Phenotype	MP:0003271	abnormal duodenum morphology			0.001098	1	0.02283	0.2036	6	58	SPINK1,GATM,KL,PLG,CA2,EGF
Mouse Phenotype	MP:0011422	kidney medulla atrophy			0.001207	1	0.02375	0.2119	3	11	REN,SLC3A1,SLC4A1
Mouse Phenotype	MP:0005665	increased circulating noradrenaline level			0.001207	1	0.02375	0.2119	3	11	KL,VAV3,A1CF
Mouse Phenotype	MP:0000525	renal tubular acidosis			0.001207	1	0.02375	0.2119	3	11	CA2,RHCG,SLC4A4
Mouse Phenotype	MP:0002962	increased urine protein level			0.001208	1	0.02375	0.2119	11	182	CRIM1,DDC,MAGI2,NPHS2,CLIC5,NPHS1,COL4A4,SOSTDC1,CUBN,LRP2,G6PC
Mouse Phenotype	MP:0012337	increased vitamin D level			0.001215	1	0.02375	0.2119	2	3	GALNT3,KL
Mouse Phenotype	MP:0011603	decreased glutathione peroxidase activity			0.001215	1	0.02375	0.2119	2	3	GPX3,LRP2
Mouse Phenotype	MP:0011735	increased urine ammonia level			0.001215	1	0.02375	0.2119	2	3	SLC26A4,UMOD
Mouse Phenotype	MP:0030094	foramen magnum stenosis			0.001215	1	0.02375	0.2119	2	3	PTH1R,FGFR3
Mouse Phenotype	MP:0020401	argininuria			0.001215	1	0.02375	0.2119	2	3	SLC3A1,SLC7A9
Mouse Phenotype	MP:0011295	abnormal tubuloglomerular feedback response			0.001215	1	0.02375	0.2119	2	3	KCNJ1,SLC12A1
Mouse Phenotype	MP:0009074	Wolffian duct degeneration			0.001215	1	0.02375	0.2119	2	3	LHX1,EMX2
Mouse Phenotype	MP:0005107	abnormal stapes morphology			0.001216	1	0.02375	0.2119	5	40	SOX9,KL,FGFR3,TFAP2A,EMX2
Mouse Phenotype	MP:0003830	abnormal testis development			0.001216	1	0.02375	0.2119	5	40	SOX9,ADGRG1,FGF9,SLC14A1,LRP2
Mouse Phenotype	MP:0000187	abnormal triglyceride level			0.00131	1	0.02546	0.2271	23	571	PDE1A,GATM,FABP1,BHMT,APOM,PPARGC1A,PHYH,HPN,ANGPTL3,UMOD,NR1H4,HNF1B,A1CF,FMO5,CXCL14,AQP3,SLC2A2,RGN,LIPC,SHANK2,MTTP,G6PC,PCK1
Mouse Phenotype	MP:0000738	impaired muscle contractility			0.001315	1	0.02546	0.2271	17	367	SOX9,ERBB4,CRIM1,PPARGC1A,CLU,NR3C2,VAV3,A1CF,NOX4,REN,SLC3A1,SLC4A1,ACE2,EFNA1,ATP1A1,ATP1B1,PCCA
Mouse Phenotype	MP:0005627	increased circulating potassium level			0.001432	1	0.02759	0.2461	6	61	GATM,PVALB,UMOD,NR3C2,REN,P3H2
Mouse Phenotype	MP:0008487	abnormal mesonephros morphology			0.001452	1	0.02785	0.2484	7	83	SOX9,CRIM1,PDZK1,GATA3,MECOM,LHX1,EMX2
Mouse Phenotype	MP:0005401	abnormal fat-soluble vitamin level			0.001521	1	0.02904	0.259	5	42	GALNT3,KL,RBP4,SLC34A1,LRP2
Mouse Phenotype	MP:0004847	abnormal liver weight			0.001532	1	0.02911	0.2597	13	246	BHMT,MET,PPARGC1A,KL,ANGPTL3,NR1H4,A1CF,GRB14,CXCL14,SLC13A1,MTTP,G6PC,PCK1
Mouse Phenotype	MP:0005333	decreased heart rate			0.001568	1	0.02961	0.2641	11	188	DDAH1,DDC,PPARGC1A,KL,BBOX1,GOT1,A1CF,NPY1R,ACE2,EFNA1,GABRA2
Mouse Phenotype	MP:0005328	abnormal circulating creatinine level			0.001576	1	0.02961	0.2641	12	217	DDC,MAGI2,NPHS2,UMOD,COL4A4,SOSTDC1,SLC13A3,REN,AQP3,TFAP2B,SLC3A1,SLC12A1
Mouse Phenotype	MP:0030657	abnormal glycine level			0.001586	1	0.02961	0.2641	3	12	DAO,ALDH1L1,PCCA
Mouse Phenotype	MP:0004119	hypokalemia			0.001586	1	0.02961	0.2641	3	12	CA2,CLDN8,ATP6V0A4
Mouse Phenotype	MP:0011453	abnormal glomerular capillary endothelium morphology			0.00174	1	0.03234	0.2885	4	26	CRIM1,MAGI2,NPHS2,CLIC5
Mouse Phenotype	MP:0005620	abnormal muscle contractility			0.001778	1	0.03291	0.2936	20	479	SOX9,ERBB4,DDAH1,CRIM1,PPARGC1A,CLU,PVALB,NR3C2,VAV3,A1CF,NPY1R,NOX4,REN,SLC3A1,SLC4A1,ACE2,EFNA1,ATP1A1,ATP1B1,PCCA
Mouse Phenotype	MP:0000031	abnormal cochlea morphology			0.001966	1	0.03622	0.3231	13	253	TSPAN12,SLC26A4,GATA3,TYRP1,CLIC5,HPN,FGF9,FGFR3,PLS1,EPS8L2,ATP6V0A4,LRP2,EMX2
Mouse Phenotype	MP:0003918	decreased kidney weight			0.001992	1	0.03654	0.3259	6	65	UMOD,HSD17B2,CXCL14,REN,SLC3A1,SLC4A4
Mouse Phenotype	MP:0011435	increased urine magnesium level			0.002031	1	0.03709	0.3309	3	13	UMOD,SLC12A1,G6PC
Mouse Phenotype	MP:0002596	abnormal hematocrit			0.002308	1	0.0416	0.3711	14	289	SOX9,TMEM30B,KCNJ1,PVALB,FGF9,NR3C2,NPR3,REN,CLDN7,AQP1,SLC4A1,SLC12A1,SLC14A1,SLC4A4
Mouse Phenotype	MP:0003186	abnormal redox activity			0.002339	1	0.0416	0.3711	10	169	DDC,PPARGC1A,KL,NR3C2,A1CF,NOX4,MSRA,ACE2,ASS1,PCCA
Mouse Phenotype	MP:0012778	abnormal liver triglyceride level			0.002362	1	0.0416	0.3711	11	198	GATM,FABP1,PPARGC1A,NR1H4,A1CF,CXCL14,SLC2A2,RGN,MTTP,G6PC,PCK1
Mouse Phenotype	MP:0008309	dilated scala media			0.002396	1	0.0416	0.3711	2	4	SLC26A4,ATP6V0A4
Mouse Phenotype	MP:0001775	abnormal selenium level			0.002396	1	0.0416	0.3711	2	4	GPX3,LRP2
Mouse Phenotype	MP:0011601	abnormal glutathione peroxidase activity			0.002396	1	0.0416	0.3711	2	4	GPX3,LRP2
Mouse Phenotype	MP:0005557	increased creatinine clearance			0.002396	1	0.0416	0.3711	2	4	UMOD,SLC12A1
Mouse Phenotype	MP:0002593	high mean erythrocyte cell number			0.002396	1	0.0416	0.3711	2	4	AQP1,SLC14A1
Mouse Phenotype	MP:0030673	increased circulating alanine level			0.002396	1	0.0416	0.3711	2	4	DAO,PCCA
Mouse Phenotype	MP:0011563	increased urine prostaglandin level			0.002396	1	0.0416	0.3711	2	4	REN,SLC12A1
Mouse Phenotype	MP:0012580	decreased peroxidase activity			0.002396	1	0.0416	0.3711	2	4	GPX3,LRP2
Mouse Phenotype	MP:0011300	abnormal juxtaglomerular cell morphology			0.002396	1	0.0416	0.3711	2	4	NR3C2,REN
Mouse Phenotype	MP:0010293	increased integument system tumor incidence			0.002442	1	0.04221	0.3765	10	170	ERBB3,PERP,F2RL1,CCN6,MET,FGFR3,PLG,MUC1,TACSTD2,CDH1
Mouse Phenotype	MP:0000029	abnormal malleus morphology			0.002526	1	0.04348	0.3879	5	47	SOX9,KL,FGFR3,TFAP2A,EMX2
Mouse Phenotype	MP:0002986	decreased urine calcium level			0.002546	1	0.04348	0.3879	3	14	TFAP2B,CLDN10,SLC12A3
Mouse Phenotype	MP:0030634	abnormal taurine level			0.002546	1	0.04348	0.3879	3	14	DAO,SLC6A13,ASS1
Mouse Phenotype	MP:0001485	abnormal pinna reflex			0.002628	1	0.0447	0.3987	7	92	RIDA,SLC26A4,MECOM,KL,TFAP2A,ATP6V0A4,EMX2
Mouse Phenotype	MP:0000523	cortical renal glomerulopathies			0.002655	1	0.04497	0.4012	11	201	CRIM1,F2RL1,MAGI2,MET,NPHS2,CLU,UMOD,NPHS1,COL4A4,SOSTDC1,REN
Mouse Phenotype	MP:0000960	abnormal sensory ganglion morphology			0.00285	1	0.04808	0.4289	13	264	SOX9,ERBB3,ERBB4,CRIM1,SLC26A4,GATA3,MECOM,CLIC5,HPN,PVALB,SOSTDC1,TFAP2A,RGN
Mouse Phenotype	MP:0009289	decreased epididymal fat pad weight			0.002908	1	0.04886	0.4359	6	70	ANGPTL3,NR1H4,NPR3,NPY1R,FMO5,PCK1
Domain	IPR018064	Metalthion_vert_metal_BS		InterPro	2.695e-07	0.0004624	0.0003536	0.002838	5	10	MT1E,MT1F,MT1G,MT1H,MT1X
Domain	IPR017854	Metalthion_dom		InterPro	8.243e-07	0.001414	0.0003536	0.002838	5	12	MT1E,MT1F,MT1G,MT1H,MT1X
Domain	4.10.10.10	-		Gene3D	8.243e-07	0.001414	0.0003536	0.002838	5	12	MT1E,MT1F,MT1G,MT1H,MT1X
Domain	IPR023587	Metalthion_dom_vert		InterPro	8.243e-07	0.001414	0.0003536	0.002838	5	12	MT1E,MT1F,MT1G,MT1H,MT1X
Domain	PS00203	METALLOTHIONEIN_VRT		PROSITE	1.322e-06	0.002268	0.000435	0.003491	5	13	MT1E,MT1F,MT1G,MT1H,MT1X
Domain	PF00131	Metallothio		Pfam	2.028e-06	0.00348	0.000435	0.003491	5	14	MT1E,MT1F,MT1G,MT1H,MT1X
Domain	IPR000006	Metalthion_vert		InterPro	2.028e-06	0.00348	0.000435	0.003491	5	14	MT1E,MT1F,MT1G,MT1H,MT1X
Domain	IPR003019	Metalthion		InterPro	2.028e-06	0.00348	0.000435	0.003491	5	14	MT1E,MT1F,MT1G,MT1H,MT1X
Domain	3.50.50.60	-		Gene3D	3.454e-05	0.05926	0.005212	0.04183	7	56	MAOA,MAOB,PIPOX,DAO,FMO1,FMO4,FMO5
Domain	IPR023753	FAD/NAD-binding_dom		InterPro	3.882e-05	0.06662	0.005212	0.04183	7	57	MAOA,MAOB,PIPOX,DAO,FMO1,FMO4,FMO5
Domain	IPR000960	Flavin_mOase		InterPro	4.252e-05	0.07297	0.005212	0.04183	3	5	FMO1,FMO4,FMO5
Domain	IPR012143	DiMe-aniline_mOase		InterPro	4.252e-05	0.07297	0.005212	0.04183	3	5	FMO1,FMO4,FMO5
Domain	PF00743	FMO-like		Pfam	4.252e-05	0.07297	0.005212	0.04183	3	5	FMO1,FMO4,FMO5
Domain	IPR020946	Flavin_mOase-like		InterPro	4.252e-05	0.07297	0.005212	0.04183	3	5	FMO1,FMO4,FMO5
Domain	IPR016040	NAD(P)-bd_dom		InterPro	0.000137	0.2352	0.01568	0.1258	11	173	DAO,ADH6,HPGD,HSD11B2,HSD17B2,FMO1,FMO5,CRYL1,CRYZ,EHHADH,DCXR
Domain	IPR024571	ERAP1-like_C_dom		InterPro	0.0002296	0.3939	0.01668	0.1339	3	8	TRHDE,ANPEP,ENPEP
Domain	PF11838	ERAP1_C		Pfam	0.0002296	0.3939	0.01668	0.1339	3	8	TRHDE,ANPEP,ENPEP
Domain	PF09469	Cobl		Pfam	0.0002722	0.467	0.01668	0.1339	2	2	COBL,COBLL1
Domain	IPR013035	PEP_carboxykinase_C		InterPro	0.0002722	0.467	0.01668	0.1339	2	2	PCK1,PCK2
Domain	3.90.228.20	-		Gene3D	0.0002722	0.467	0.01668	0.1339	2	2	PCK1,PCK2
Domain	IPR019025	Cordon-bleu_ubiquitin_domain		InterPro	0.0002722	0.467	0.01668	0.1339	2	2	COBL,COBLL1
Domain	IPR018091	PEP_carboxykin_GTP_CS		InterPro	0.0002722	0.467	0.01668	0.1339	2	2	PCK1,PCK2
Domain	PF00821	PEPCK		Pfam	0.0002722	0.467	0.01668	0.1339	2	2	PCK1,PCK2
Domain	IPR008209	PEP_carboxykinase_GTP		InterPro	0.0002722	0.467	0.01668	0.1339	2	2	PCK1,PCK2
Domain	PS00505	PEPCK_GTP		PROSITE	0.0002722	0.467	0.01668	0.1339	2	2	PCK1,PCK2
Domain	IPR008210	PEP_carboxykinase_N		InterPro	0.0002722	0.467	0.01668	0.1339	2	2	PCK1,PCK2
Domain	IPR017226	Betaine-hCys_S-MeTrfase_BHMT		InterPro	0.0002722	0.467	0.01668	0.1339	2	2	BHMT,BHMT2
Domain	3.40.449.10	-		Gene3D	0.0002722	0.467	0.01668	0.1339	2	2	PCK1,PCK2
Domain	IPR004749	Orgcat_transp/SVOP		InterPro	0.0003402	0.5837	0.02013	0.1615	3	9	SLC22A6,SLC22A2,SLC22A5
Domain	IPR020846	MFS_dom		InterPro	0.0003691	0.6334	0.02111	0.1694	9	134	SLC17A3,SLC22A6,SLC2A2,SLCO4C1,SLC16A4,SLC15A2,SLC17A1,SLC22A2,SLC22A5
Domain	PS50850	MFS		PROSITE	0.0004045	0.6942	0.02239	0.1797	8	108	SLC17A3,SLC22A6,SLC2A2,SLCO4C1,SLC16A4,SLC17A1,SLC22A2,SLC22A5
Domain	3.40.50.720	-		Gene3D	0.0004864	0.8346	0.02608	0.2093	10	169	ADH6,HPGD,HSD11B2,HSD17B2,FMO1,FMO5,CRYL1,CRYZ,EHHADH,DCXR
Domain	IPR023696	Ureohydrolase_domain		InterPro	0.0007943	1	0.0284	0.2279	2	3	ARG2,AGMAT
Domain	3.40.800.10	-		Gene3D	0.0007943	1	0.0284	0.2279	2	3	ARG2,AGMAT
Domain	PS51409	ARGINASE_2		PROSITE	0.0007943	1	0.0284	0.2279	2	3	ARG2,AGMAT
Domain	PS50970	HCY		PROSITE	0.0007943	1	0.0284	0.2279	2	3	BHMT,BHMT2
Domain	PS01053	ARGINASE_1		PROSITE	0.0007943	1	0.0284	0.2279	2	3	ARG2,AGMAT
Domain	3.20.20.330	-		Gene3D	0.0007943	1	0.0284	0.2279	2	3	BHMT,BHMT2
Domain	IPR013612	AA_permease_N		InterPro	0.0007943	1	0.0284	0.2279	2	3	SLC12A1,SLC12A3
Domain	IPR001613	Flavin_amine_oxidase		InterPro	0.0007943	1	0.0284	0.2279	2	3	MAOA,MAOB
Domain	IPR006035	Ureohydrolase		InterPro	0.0007943	1	0.0284	0.2279	2	3	ARG2,AGMAT
Domain	PF02574	S-methyl_trans		Pfam	0.0007943	1	0.0284	0.2279	2	3	BHMT,BHMT2
Domain	IPR020855	Ureohydrolase_Mn_BS		InterPro	0.0007943	1	0.0284	0.2279	2	3	ARG2,AGMAT
Domain	IPR003726	HCY_dom		InterPro	0.0007943	1	0.0284	0.2279	2	3	BHMT,BHMT2
Domain	PS00458	ANF_RECEPTORS		PROSITE	0.0007943	1	0.0284	0.2279	2	3	NPR1,NPR3
Domain	PF00491	Arginase		Pfam	0.0007943	1	0.0284	0.2279	2	3	ARG2,AGMAT
Domain	IPR001170	ANPR/GUC		InterPro	0.0007943	1	0.0284	0.2279	2	3	NPR1,NPR3
Domain	PF08403	AA_permease_N		Pfam	0.0007943	1	0.0284	0.2279	2	3	SLC12A1,SLC12A3
Domain	IPR024731	EGF_dom		InterPro	0.000859	1	0.0289	0.2319	3	12	NELL1,UMOD,CUBN
Domain	PF12947	EGF_3		Pfam	0.000859	1	0.0289	0.2319	3	12	NELL1,UMOD,CUBN
Domain	IPR001930	Peptidase_M1		InterPro	0.000859	1	0.0289	0.2319	3	12	TRHDE,ANPEP,ENPEP
Domain	1.10.540.10	-		Gene3D	0.001103	1	0.03383	0.2715	3	13	ACADL,ACADSB,ACOX2
Domain	IPR014782	Peptidase_M1_N		InterPro	0.001103	1	0.03383	0.2715	3	13	TRHDE,ANPEP,ENPEP
Domain	IPR013786	AcylCoA_DH/ox_N		InterPro	0.001103	1	0.03383	0.2715	3	13	ACADL,ACADSB,ACOX2
Domain	PF01433	Peptidase_M1		Pfam	0.001103	1	0.03383	0.2715	3	13	TRHDE,ANPEP,ENPEP
Domain	IPR009030	Growth_fac_rcpt_		InterPro	0.001104	1	0.03383	0.2715	9	156	ERBB3,ERBB4,CRIM1,CCN6,NELL1,UMOD,CUBN,EGF,LRP2
Domain	PF00725	3HCDH		Pfam	0.001571	1	0.04148	0.3329	2	4	CRYL1,EHHADH
Domain	IPR006176	3-OHacyl-CoA_DH_NAD-bd		InterPro	0.001571	1	0.04148	0.3329	2	4	CRYL1,EHHADH
Domain	IPR006180	3-OHacyl-CoA_DH_CS		InterPro	0.001571	1	0.04148	0.3329	2	4	CRYL1,EHHADH
Domain	IPR018120	Glyco_hydro_1_AS		InterPro	0.001571	1	0.04148	0.3329	2	4	KL,GBA3
Domain	IPR006108	3HC_DH_C		InterPro	0.001571	1	0.04148	0.3329	2	4	CRYL1,EHHADH
Domain	PS00067	3HCDH		PROSITE	0.001571	1	0.04148	0.3329	2	4	CRYL1,EHHADH
Domain	IPR033132	Glyco_hydro_1_N_CS		InterPro	0.001571	1	0.04148	0.3329	2	4	KL,GBA3
Domain	PF02737	3HCDH_N		Pfam	0.001571	1	0.04148	0.3329	2	4	CRYL1,EHHADH
Domain	IPR016245	Tyr_kinase_EGF/ERB/XmrK_rcpt		InterPro	0.001571	1	0.04148	0.3329	2	4	ERBB3,ERBB4
Domain	IPR023561	Carbonic_anhydrase_a-class		InterPro	0.001713	1	0.04199	0.337	3	15	CA10,CA2,CA12
Domain	PS00162	ALPHA_CA_1		PROSITE	0.001713	1	0.04199	0.337	3	15	CA10,CA2,CA12
Domain	IPR006091	Acyl-CoA_Oxase/DH_cen-dom		InterPro	0.001713	1	0.04199	0.337	3	15	ACADL,ACADSB,ACOX2
Domain	IPR009100	AcylCoA_DH/oxidase_NM_dom		InterPro	0.001713	1	0.04199	0.337	3	15	ACADL,ACADSB,ACOX2
Domain	PF02770	Acyl-CoA_dh_M		Pfam	0.001713	1	0.04199	0.337	3	15	ACADL,ACADSB,ACOX2
Domain	PF01007	IRK		Pfam	0.002083	1	0.04583	0.3678	3	16	KCNJ1,KCNJ15,KCNJ16
Domain	2.60.40.1400	-		Gene3D	0.002083	1	0.04583	0.3678	3	16	KCNJ1,KCNJ15,KCNJ16
Domain	IPR016449	K_chnl_inward-rec_Kir		InterPro	0.002083	1	0.04583	0.3678	3	16	KCNJ1,KCNJ15,KCNJ16
Domain	IPR013518	K_chnl_inward-rec_Kir_cyto		InterPro	0.002083	1	0.04583	0.3678	3	16	KCNJ1,KCNJ15,KCNJ16
Domain	IPR009075	AcylCo_DH/oxidase_C		InterPro	0.002083	1	0.04583	0.3678	3	16	ACADL,ACADSB,ACOX2
Domain	IPR020904	Sc_DH/Rdtase_CS		InterPro	0.002481	1	0.04583	0.3678	4	35	HPGD,HSD11B2,HSD17B2,DCXR
Domain	PF00194	Carb_anhydrase		Pfam	0.002499	1	0.04583	0.3678	3	17	CA10,CA2,CA12
Domain	SM01057	Carb_anhydrase		SMART	0.002499	1	0.04583	0.3678	3	17	CA10,CA2,CA12
Domain	PF13193	AMP-binding_C		Pfam	0.002499	1	0.04583	0.3678	3	17	ACSM3,SLC27A2,ACSF2
Domain	3.10.200.10	-		Gene3D	0.002499	1	0.04583	0.3678	3	17	CA10,CA2,CA12
Domain	PS51144	ALPHA_CA_2		PROSITE	0.002499	1	0.04583	0.3678	3	17	CA10,CA2,CA12
Domain	IPR016160	Ald_DH_CS_CYS		InterPro	0.002499	1	0.04583	0.3678	3	17	ALDH8A1,ALDH1L1,ALDH6A1
Domain	IPR025110	AMP-bd_C		InterPro	0.002499	1	0.04583	0.3678	3	17	ACSM3,SLC27A2,ACSF2
Domain	IPR001148	Carbonic_anhydrase_a		InterPro	0.002499	1	0.04583	0.3678	3	17	CA10,CA2,CA12
Domain	IPR004979	TF_AP2		InterPro	0.00259	1	0.04583	0.3678	2	5	TFAP2A,TFAP2B
Domain	IPR001898	Na/sul_symport		InterPro	0.00259	1	0.04583	0.3678	2	5	SLC13A3,SLC13A1
Domain	IPR013854	TF_AP2_C		InterPro	0.00259	1	0.04583	0.3678	2	5	TFAP2A,TFAP2B
Domain	PF00232	Glyco_hydro_1		Pfam	0.00259	1	0.04583	0.3678	2	5	KL,GBA3
Domain	PF03299	TF_AP-2		Pfam	0.00259	1	0.04583	0.3678	2	5	TFAP2A,TFAP2B
Domain	SM00473	PAN_AP		SMART	0.00259	1	0.04583	0.3678	2	5	PLG,MST1L
Domain	PS00653	GLYCOSYL_HYDROL_F1_2		PROSITE	0.00259	1	0.04583	0.3678	2	5	KL,GBA3
Domain	IPR001360	Glyco_hydro_1		InterPro	0.00259	1	0.04583	0.3678	2	5	KL,GBA3
Domain	PS00572	GLYCOSYL_HYDROL_F1_1		PROSITE	0.00259	1	0.04583	0.3678	2	5	KL,GBA3
Domain	IPR013295	MAL		InterPro	0.00259	1	0.04583	0.3678	2	5	MAL,PLLP
Domain	IPR006535	HnRNP_R/Q_splicing_fac		InterPro	0.00259	1	0.04583	0.3678	2	5	RBM47,A1CF
Domain	PF00939	Na_sulph_symp		Pfam	0.00259	1	0.04583	0.3678	2	5	SLC13A3,SLC13A1
Domain	IPR021115	Pyridoxal-P_BS		InterPro	0.00259	1	0.04583	0.3678	2	5	GAD1,DDC
Domain	IPR005828	MFS_sugar_transport-like		InterPro	0.002755	1	0.04776	0.3833	4	36	SLC22A6,SLC2A2,SLC22A2,SLC22A5
Domain	PF00083	Sugar_tr		Pfam	0.002755	1	0.04776	0.3833	4	36	SLC22A6,SLC2A2,SLC22A2,SLC22A5
Domain	PF07645	EGF_CA		Pfam	0.002893	1	0.04964	0.3984	6	86	NELL1,UMOD,CRTAC1,CUBN,EGF,LRP2
Domain	PS00687	ALDEHYDE_DEHYDR_GLU		PROSITE	0.002962	1	0.04984	0.3999	3	18	ALDH8A1,ALDH1L1,ALDH6A1
Domain	PS00070	ALDEHYDE_DEHYDR_CYS		PROSITE	0.002962	1	0.04984	0.3999	3	18	ALDH8A1,ALDH1L1,ALDH6A1
Pathway	132956	Metabolic pathways		BioSystems: KEGG	3.436e-12	5.246e-09	5.246e-09	4.149e-08	63	1272	EPHX2,HGD,GAD1,CDS1,UPB1,AOC1,IMPA2,GALNT3,MAOA,ACADL,MAOB,ACADSB,ACAT1,CYP3A5,GATM,PIPOX,DAO,HMGCS2,DDC,ACOX2,BHMT,ADH6,TYRP1,PRODH2,KL,ACSM3,HPD,GLDC,BHMT2,PIP5K1B,AK4,KHK,UGT2B28,HSD17B2,ALDOB,ALDH6A1,GOT1,GALNT14,DPYS,ANPEP,HYAL1,AOX1,ARG2,GBA3,CRYL1,RGN,LIPC,EHHADH,GALNT11,UGT2A3,ATP6V0A4,ASPA,ASS1,AKR1C3,AGMAT,OGDHL,CYP4F3,PCCA,G6PC,HAO2,DCXR,PCK1,PCK2
Pathway	MAP00350_Tyrosine_metabolism	MAP00350 Tyrosine metabolism		GenMAPP	4.068e-09	6.211e-06	3.083e-06	2.438e-05	9	30	HGD,AOC1,MAOA,MAOB,DDC,ADH6,HPD,GOT1,AOX1
Pathway	144182	Proximal tubule bicarbonate reclamation		BioSystems: KEGG	8.076e-09	1.233e-05	3.083e-06	2.438e-05	8	23	CA2,AQP1,ATP1A1,SLC4A4,ATP1B1,FXYD2,PCK1,PCK2
Pathway	M4361	Proximal tubule bicarbonate reclamation		MSigDB C2 BIOCARTA (v7.1)	8.076e-09	1.233e-05	3.083e-06	2.438e-05	8	23	CA2,AQP1,ATP1A1,SLC4A4,ATP1B1,FXYD2,PCK1,PCK2
Pathway	1269907	SLC-mediated transmembrane transport		BioSystems: REACTOME	1.27e-08	1.939e-05	3.879e-06	3.067e-05	23	287	SLC26A4,SLC22A6,SLC5A12,RHCG,SLC13A3,SLC44A4,SLC2A2,SLC3A1,SLC4A1,SLC7A9,SLC6A13,SLC12A1,SLC12A3,SLCO4C1,SLC13A1,SLC14A1,SLC15A2,SLC17A1,SLC34A1,SLC22A2,SLC22A5,SLC4A4,G6PC
Pathway	82959	Tyrosine metabolism		BioSystems: KEGG	1.841e-08	2.811e-05	4.685e-06	3.706e-05	9	35	HGD,MAOA,MAOB,DDC,ADH6,TYRP1,HPD,GOT1,AOX1
Pathway	M2551	Arginine and proline metabolism		MSigDB C2 BIOCARTA (v7.1)	8.694e-08	0.0001328	1.897e-05	0.00015	10	54	AOC1,MAOA,MAOB,GATM,DAO,PRODH2,GOT1,ARG2,ASS1,AGMAT
Pathway	M16743	Tyrosine metabolism		MSigDB C2 BIOCARTA (v7.1)	1.03e-07	0.0001573	1.966e-05	0.0001555	9	42	HGD,MAOA,MAOB,DDC,ADH6,TYRP1,HPD,GOT1,AOX1
Pathway	1269903	Transmembrane transport of small molecules		BioSystems: REACTOME	1.906e-07	0.0002911	3.234e-05	0.0002558	35	680	SLC17A3,AZGP1,SLC26A4,ABCB1,SLC22A6,CLCNKB,TRPM3,SLC5A12,RHCG,SLC13A3,SLC44A4,AQP1,AQP3,SLC2A2,SLC3A1,SLC4A1,SLC7A9,SLC6A13,SLC12A1,SLC12A3,SLCO4C1,SLC13A1,SLC14A1,SLC15A2,SLC17A1,SLC34A1,SLC22A2,SLC22A5,ATP6V0A4,ATP1A1,SLC4A4,ATP1B1,FXYD2,G6PC,GABRA2
Pathway	SMP00006	Tyrosine Metabolism		SMPDB	2.868e-07	0.000438	4.38e-05	0.0003464	7	24	HGD,AOC1,MAOA,DDC,HPD,GOT1,NOX4
Pathway	MAP00360_Phenylalanine_metabolism	MAP00360 Phenylalanine metabolism		GenMAPP	3.872e-07	0.0005913	4.928e-05	0.0003897	6	16	AOC1,MAOA,MAOB,DDC,HPD,GOT1
Pathway	PW:0000052	tyrosine metabolic		Pathway Ontology	3.872e-07	0.0005913	4.928e-05	0.0003897	6	16	AOC1,MAOB,DDC,HPD,GOT1,AOX1
Pathway	82957	Arginine and proline metabolism		BioSystems: KEGG	5.04e-07	0.0007697	5.88e-05	0.000465	9	50	AOC1,MAOA,MAOB,GATM,DAO,PRODH2,GOT1,ARG2,AGMAT
Pathway	82960	Phenylalanine metabolism		BioSystems: KEGG	5.886e-07	0.0008988	5.88e-05	0.000465	6	17	GLYAT,MAOA,MAOB,DDC,HPD,GOT1
Pathway	MAP00330_Arginine_and_proline_metabolism	MAP00330 Arginine and proline metabolism		GenMAPP	6.228e-07	0.000951	5.88e-05	0.000465	8	38	AOC1,MAOA,MAOB,DAO,GOT1,ARG2,ASS1,AGMAT
Pathway	82964	Tryptophan metabolism		BioSystems: KEGG	9.464e-07	0.001445	5.88e-05	0.000465	8	40	AOC1,MAOA,MAOB,ACAT1,DDC,AOX1,EHHADH,OGDHL
Pathway	M980	Tryptophan metabolism		MSigDB C2 BIOCARTA (v7.1)	9.464e-07	0.001445	5.88e-05	0.000465	8	40	AOC1,MAOA,MAOB,ACAT1,DDC,AOX1,EHHADH,OGDHL
Pathway	83032	Drug metabolism - cytochrome P450		BioSystems: KEGG	1.091e-06	0.001666	5.88e-05	0.000465	10	70	MAOA,MAOB,CYP3A5,ADH6,UGT2B28,FMO1,FMO4,FMO5,AOX1,UGT2A3
Pathway	SMP00100	Hydrochlorothiazide Pathway		SMPDB	1.232e-06	0.001882	5.88e-05	0.000465	5	11	AQP1,SLC12A3,ATP1A1,ATP1B1,FXYD2
Pathway	SMP00103	Cyclothiazide Pathway		SMPDB	1.232e-06	0.001882	5.88e-05	0.000465	5	11	AQP1,SLC12A3,ATP1A1,ATP1B1,FXYD2
Pathway	SMP00105	Metolazone Pathway		SMPDB	1.232e-06	0.001882	5.88e-05	0.000465	5	11	AQP1,SLC12A3,ATP1A1,ATP1B1,FXYD2
Pathway	SMP00108	Hydroflumethiazide Pathway		SMPDB	1.232e-06	0.001882	5.88e-05	0.000465	5	11	AQP1,SLC12A3,ATP1A1,ATP1B1,FXYD2
Pathway	SMP00110	Indapamide Pathway		SMPDB	1.232e-06	0.001882	5.88e-05	0.000465	5	11	AQP1,SLC12A3,ATP1A1,ATP1B1,FXYD2
Pathway	SMP00122	Chlorthalidone Pathway		SMPDB	1.232e-06	0.001882	5.88e-05	0.000465	5	11	AQP1,SLC12A3,ATP1A1,ATP1B1,FXYD2
Pathway	SMP00121	Trichlormethiazide Pathway		SMPDB	1.232e-06	0.001882	5.88e-05	0.000465	5	11	AQP1,SLC12A3,ATP1A1,ATP1B1,FXYD2
Pathway	1339158	Metallothioneins bind metals		BioSystems: REACTOME	1.232e-06	0.001882	5.88e-05	0.000465	5	11	MT1E,MT1F,MT1G,MT1H,MT1X
Pathway	1339157	Response to metal ions		BioSystems: REACTOME	1.232e-06	0.001882	5.88e-05	0.000465	5	11	MT1E,MT1F,MT1G,MT1H,MT1X
Pathway	SMP00078	Chlorothiazide Pathway		SMPDB	1.232e-06	0.001882	5.88e-05	0.000465	5	11	AQP1,SLC12A3,ATP1A1,ATP1B1,FXYD2
Pathway	SMP00081	Methyclothiazide Pathway		SMPDB	1.232e-06	0.001882	5.88e-05	0.000465	5	11	AQP1,SLC12A3,ATP1A1,ATP1B1,FXYD2
Pathway	SMP00080	Polythiazide Pathway		SMPDB	1.232e-06	0.001882	5.88e-05	0.000465	5	11	AQP1,SLC12A3,ATP1A1,ATP1B1,FXYD2
Pathway	SMP00090	Bendroflumethiazide Pathway		SMPDB	1.232e-06	0.001882	5.88e-05	0.000465	5	11	AQP1,SLC12A3,ATP1A1,ATP1B1,FXYD2
Pathway	SMP00091	Quinethazone Pathway		SMPDB	1.232e-06	0.001882	5.88e-05	0.000465	5	11	AQP1,SLC12A3,ATP1A1,ATP1B1,FXYD2
Pathway	M9257	Drug metabolism - cytochrome P450		MSigDB C2 BIOCARTA (v7.1)	1.425e-06	0.002176	6.593e-05	0.0005214	10	72	MAOA,MAOB,CYP3A5,ADH6,UGT2B28,FMO1,FMO4,FMO5,AOX1,UGT2A3
Pathway	M766	Glycine, serine and threonine metabolism		MSigDB C2 BIOCARTA (v7.1)	1.935e-06	0.002955	8.351e-05	0.0006604	7	31	MAOA,MAOB,GATM,PIPOX,DAO,BHMT,GLDC
Pathway	SMP00115	Furosemide Pathway		SMPDB	2.078e-06	0.003173	8.351e-05	0.0006604	5	12	AQP1,SLC12A1,ATP1A1,ATP1B1,FXYD2
Pathway	SMP00118	Torsemide Pathway		SMPDB	2.078e-06	0.003173	8.351e-05	0.0006604	5	12	AQP1,SLC12A1,ATP1A1,ATP1B1,FXYD2
Pathway	SMP00088	Bumetanide Pathway		SMPDB	2.078e-06	0.003173	8.351e-05	0.0006604	5	12	AQP1,SLC12A1,ATP1A1,ATP1B1,FXYD2
Pathway	SMP00097	Ethacrynic Acid pathway		SMPDB	2.078e-06	0.003173	8.351e-05	0.0006604	5	12	AQP1,SLC12A1,ATP1A1,ATP1B1,FXYD2
Pathway	PW:0000050	arginine and proline metabolic		Pathway Ontology	2.414e-06	0.003687	9.453e-05	0.0007476	6	21	AOC1,MAOB,GATM,GOT1,ARG2,ASS1
Pathway	MAP00380_Tryptophan_metabolism	MAP00380 Tryptophan metabolism		GenMAPP	2.898e-06	0.004425	0.0001106	0.0008748	8	46	AOC1,MAOA,MAOB,ACAT1,CYP3A5,DDC,AOX1,EHHADH
Pathway	83075	Renin-angiotensin system		BioSystems: KEGG	4.344e-06	0.006633	0.0001579	0.001249	6	23	MME,KLK1,ANPEP,REN,ACE2,ENPEP
Pathway	MAP00260_Glycine_serine_and_threonine_metabolism	MAP00260 Glycine serine and threonine metabolism		GenMAPP	4.344e-06	0.006633	0.0001579	0.001249	6	23	AOC1,MAOA,MAOB,DAO,BHMT,GLDC
Pathway	SMP00133	Amiloride Pathway		SMPDB	5.085e-06	0.007765	0.0001765	0.001396	5	14	AQP3,SLC22A2,ATP1A1,ATP1B1,FXYD2
Pathway	SMP00132	Triamterene Pathway		SMPDB	5.085e-06	0.007765	0.0001765	0.001396	5	14	AQP3,SLC22A2,ATP1A1,ATP1B1,FXYD2
Pathway	212237	Mineral absorption		BioSystems: KEGG	6.492e-06	0.009913	0.0002203	0.001742	8	51	MT1E,MT1F,MT1G,MT1H,MT1X,ATP1A1,ATP1B1,FXYD2
Pathway	PW:0000492	renin-angiotensin system signaling		Pathway Ontology	7.504e-06	0.01146	0.0002491	0.00197	5	15	MME,ANPEP,REN,ACE2,ENPEP
Pathway	1269908	Transport of inorganic cations/anions and amino acids/oligopeptides		BioSystems: REACTOME	8.615e-06	0.01316	0.0002799	0.002214	11	107	SLC26A4,SLC5A12,SLC3A1,SLC4A1,SLC7A9,SLC12A1,SLC12A3,SLC15A2,SLC17A1,SLC34A1,SLC4A4
Pathway	193146	Bile secretion		BioSystems: KEGG	1.043e-05	0.01593	0.0003318	0.002624	9	71	ABCB1,NR1H4,CA2,AQP1,SLC10A2,ATP1A1,SLC4A4,ATP1B1,FXYD2
Pathway	172847	Protein digestion and absorption		BioSystems: KEGG	1.112e-05	0.01699	0.0003466	0.002741	10	90	MME,COL4A3,COL4A4,XPNPEP2,SLC3A1,SLC7A9,ACE2,ATP1A1,ATP1B1,FXYD2
Pathway	82949	Glycine, serine and threonine metabolism		BioSystems: KEGG	1.179e-05	0.018	0.0003599	0.002847	7	40	MAOA,MAOB,GATM,PIPOX,DAO,BHMT,GLDC
Pathway	1270158	Metabolism of amino acids and derivatives		BioSystems: REACTOME	1.322e-05	0.02019	0.000396	0.003131	21	367	HGD,ACADSB,ACAT1,GATM,PIPOX,DAO,DDC,BHMT,TYRP1,HPD,GLDC,BHMT2,DIO1,BBOX1,ALDH6A1,GOT1,ARG2,ASPA,ASS1,AGMAT,FOLH1B
Pathway	PW:0000641	gluconeogenesis pathway		Pathway Ontology	1.497e-05	0.02286	0.0004313	0.003411	5	17	ALDOB,GOT1,G6PC,PCK1,PCK2
Pathway	M17636	Renin-angiotensin system		MSigDB C2 BIOCARTA (v7.1)	1.497e-05	0.02286	0.0004313	0.003411	5	17	MME,ANPEP,REN,ACE2,ENPEP
Pathway	PW:0000053	phenylalanine metabolic		Pathway Ontology	1.756e-05	0.02682	0.0004966	0.003927	4	9	AOC1,MAOB,DDC,GOT1
Pathway	M16650	Phenylalanine metabolism		MSigDB C2 BIOCARTA (v7.1)	2.039e-05	0.03114	0.0005561	0.004398	5	18	MAOA,MAOB,DDC,HPD,GOT1
Pathway	1268749	Metabolism of Angiotensinogen to Angiotensins		BioSystems: REACTOME	2.039e-05	0.03114	0.0005561	0.004398	5	18	MME,ANPEP,REN,ACE2,ENPEP
Pathway	M11835	Valine, leucine and isoleucine degradation		MSigDB C2 BIOCARTA (v7.1)	2.264e-05	0.03458	0.0005988	0.004736	7	44	ACADSB,ACAT1,HMGCS2,ALDH6A1,AOX1,EHHADH,PCCA
Pathway	SMP00032	Valine, Leucine and Isoleucine Degradation		SMPDB	2.274e-05	0.03473	0.0005988	0.004736	6	30	ACADSB,ACAT1,HMGCS2,ALDH6A1,AOX1,PCCA
Pathway	213307	Endocrine and other factor-regulated calcium reabsorption		BioSystems: KEGG	3.533e-05	0.05394	0.0009091	0.00719	7	47	PTH1R,KL,KLK1,CALB1,ATP1A1,ATP1B1,FXYD2
Pathway	MAP00340_Histidine_metabolism	MAP00340 Histidine metabolism		GenMAPP	3.572e-05	0.05455	0.0009091	0.00719	5	20	AOC1,MAOA,MAOB,DDC,ASPA
Pathway	1268880	Constitutive Signaling by Aberrant PI3K in Cancer		BioSystems: REACTOME	4.052e-05	0.06187	0.0009686	0.00766	8	65	ERBB3,ERBB4,MET,KL,FGF1,FGF9,FGFR3,EGF
Pathway	82952	Valine, leucine and isoleucine degradation		BioSystems: KEGG	4.067e-05	0.0621	0.0009686	0.00766	7	48	ACADSB,ACAT1,HMGCS2,ALDH6A1,AOX1,EHHADH,PCCA
Pathway	1269923	Transport of glucose and other sugars, bile salts and organic acids, metal ions and amine compounds		BioSystems: REACTOME	4.695e-05	0.07169	0.0009686	0.00766	10	106	SLC22A6,RHCG,SLC13A3,SLC44A4,SLC2A2,SLC6A13,SLC13A1,SLC14A1,SLC22A2,SLC22A5
Pathway	SMP00146	Captopril Pathway		SMPDB	4.821e-05	0.07361	0.0009686	0.00766	6	34	NR3C2,REN,AQP3,ATP1A1,ATP1B1,FXYD2
Pathway	SMP00145	Benazepril Pathway		SMPDB	4.821e-05	0.07361	0.0009686	0.00766	6	34	NR3C2,REN,AQP3,ATP1A1,ATP1B1,FXYD2
Pathway	SMP00148	Enalapril Pathway		SMPDB	4.821e-05	0.07361	0.0009686	0.00766	6	34	NR3C2,REN,AQP3,ATP1A1,ATP1B1,FXYD2
Pathway	SMP00147	Cilazapril Pathway		SMPDB	4.821e-05	0.07361	0.0009686	0.00766	6	34	NR3C2,REN,AQP3,ATP1A1,ATP1B1,FXYD2
Pathway	SMP00149	Fosinopril Pathway		SMPDB	4.821e-05	0.07361	0.0009686	0.00766	6	34	NR3C2,REN,AQP3,ATP1A1,ATP1B1,FXYD2
Pathway	SMP00151	Moexipril Pathway		SMPDB	4.821e-05	0.07361	0.0009686	0.00766	6	34	NR3C2,REN,AQP3,ATP1A1,ATP1B1,FXYD2
Pathway	SMP00150	Lisinopril Pathway		SMPDB	4.821e-05	0.07361	0.0009686	0.00766	6	34	NR3C2,REN,AQP3,ATP1A1,ATP1B1,FXYD2
Pathway	SMP00153	Quinapril Pathway		SMPDB	4.821e-05	0.07361	0.0009686	0.00766	6	34	NR3C2,REN,AQP3,ATP1A1,ATP1B1,FXYD2
Pathway	SMP00152	Perindopril Pathway		SMPDB	4.821e-05	0.07361	0.0009686	0.00766	6	34	NR3C2,REN,AQP3,ATP1A1,ATP1B1,FXYD2
Pathway	SMP00155	Rescinnamine Pathway		SMPDB	4.821e-05	0.07361	0.0009686	0.00766	6	34	NR3C2,REN,AQP3,ATP1A1,ATP1B1,FXYD2
Pathway	SMP00154	Ramipril Pathway		SMPDB	4.821e-05	0.07361	0.0009686	0.00766	6	34	NR3C2,REN,AQP3,ATP1A1,ATP1B1,FXYD2
Pathway	SMP00157	Trandolapril Pathway		SMPDB	4.821e-05	0.07361	0.0009686	0.00766	6	34	NR3C2,REN,AQP3,ATP1A1,ATP1B1,FXYD2
Pathway	SMP00156	Spirapril Pathway		SMPDB	4.821e-05	0.07361	0.0009686	0.00766	6	34	NR3C2,REN,AQP3,ATP1A1,ATP1B1,FXYD2
Pathway	1383020	PI5P, PP2A and IER3 Regulate PI3K/AKT Signaling		BioSystems: REACTOME	5.455e-05	0.08329	0.001082	0.008555	9	87	ERBB3,ERBB4,MET,KL,FGF1,PIP5K1B,FGF9,FGFR3,EGF
Pathway	M13088	PPAR signaling pathway		MSigDB C2 BIOCARTA (v7.1)	6.27e-05	0.09574	0.001227	0.009708	8	69	ACADL,HMGCS2,ACOX2,FABP1,SLC27A2,EHHADH,PCK1,PCK2
Pathway	PW:0000054	tryptophan metabolic		Pathway Ontology	7.385e-05	0.1128	0.001427	0.01129	5	23	AOC1,MAOB,ACAT1,DDC,AOX1
Pathway	1339147	Metabolism of fat-soluble vitamins		BioSystems: REACTOME	7.826e-05	0.1195	0.001494	0.01181	7	53	APOM,GPC4,SDC4,RBP4,CUBN,AKR1C3,LRP2
Pathway	130626	Aldosterone-regulated sodium reabsorption		BioSystems: KEGG	7.929e-05	0.1211	0.001495	0.01182	6	37	KCNJ1,NR3C2,HSD11B2,ATP1A1,ATP1B1,FXYD2
Pathway	83042	PPAR signaling pathway		BioSystems: KEGG	8.528e-05	0.1302	0.001588	0.01256	8	72	ACADL,HMGCS2,ACOX2,FABP1,SLC27A2,EHHADH,PCK1,PCK2
Pathway	814926	Carbon metabolism		BioSystems: KEGG	8.735e-05	0.1334	0.001606	0.0127	10	114	ACAT1,GLDC,ALDOB,ALDH6A1,GOT1,RGN,EHHADH,OGDHL,PCCA,HAO2
Pathway	82958	Histidine metabolism		BioSystems: KEGG	9.178e-05	0.1402	0.001606	0.0127	5	24	AOC1,MAOA,MAOB,DDC,ASPA
Pathway	M12950	Angiotensin-converting enzyme 2 regulates heart function		MSigDB C2 BIOCARTA (v7.1)	9.36e-05	0.1429	0.001606	0.0127	4	13	COL4A3,COL4A4,REN,ACE2
Pathway	SMP00135	Eplerenone Pathway		SMPDB	9.36e-05	0.1429	0.001606	0.0127	4	13	AQP3,ATP1A1,ATP1B1,FXYD2
Pathway	SMP00134	Spironolactone Pathway		SMPDB	9.36e-05	0.1429	0.001606	0.0127	4	13	AQP3,ATP1A1,ATP1B1,FXYD2
Pathway	1269412	FGFR3c ligand binding and activation		BioSystems: REACTOME	9.36e-05	0.1429	0.001606	0.0127	4	13	GALNT3,FGF1,FGF9,FGFR3
Pathway	1269410	FGFR3 ligand binding and activation		BioSystems: REACTOME	9.36e-05	0.1429	0.001606	0.0127	4	13	GALNT3,FGF1,FGF9,FGFR3
Pathway	1269191	Negative regulation of the PI3K/AKT network		BioSystems: REACTOME	0.0001003	0.1532	0.001702	0.01346	9	94	ERBB3,ERBB4,MET,KL,FGF1,PIP5K1B,FGF9,FGFR3,EGF
Pathway	PW:0000077	beta-alanine metabolic		Pathway Ontology	0.000129	0.197	0.002165	0.01712	4	14	GAD1,UPB1,AOC1,DPYS
Pathway	MAP00280_Valine_leucine_and_isoleucine_degradation	MAP00280 Valine leucine and isoleucine degradation		GenMAPP	0.0001375	0.21	0.002282	0.01805	5	26	HMGCS2,ALDH6A1,AOX1,EHHADH,PCCA
Pathway	M6391	Peroxisome		MSigDB C2 BIOCARTA (v7.1)	0.0001509	0.2303	0.002477	0.01959	8	78	EPHX2,PIPOX,DAO,ACOX2,PHYH,SLC27A2,EHHADH,HAO2
Pathway	1270001	Metabolism of lipids and lipoproteins		BioSystems: REACTOME	0.0001629	0.2487	0.002641	0.02089	32	816	EPHX2,CDS1,ACADL,ACAT1,HMGCS2,ACOX2,FABP1,BHMT,PPARGC1A,PHYH,ACSM3,HPGD,ANGPTL3,PIP5K1B,HSD11B2,HSD17B2,NR1H4,SLC27A2,ACSF2,CUBN,SLC44A4,GBA3,LIPC,SLC10A2,ARSL,EHHADH,OSBPL3,MTTP,AKR1C3,CYP4F3,PCCA,HAO2
Pathway	M16473	Aldosterone-regulated sodium reabsorption		MSigDB C2 BIOCARTA (v7.1)	0.0001647	0.2515	0.002641	0.02089	6	42	KCNJ1,NR3C2,HSD11B2,ATP1A1,ATP1B1,FXYD2
Pathway	997799	Glucuronate pathway (uronate pathway)		BioSystems: KEGG	0.0001661	0.2536	0.002641	0.02089	5	27	KL,UGT2B28,CRYL1,UGT2A3,DCXR
Pathway	1270040	Bile acid and bile salt metabolism		BioSystems: REACTOME	0.0001883	0.2875	0.002964	0.02344	6	43	ACOX2,NR1H4,SLC27A2,SLC10A2,OSBPL3,AKR1C3
Pathway	83007	Butanoate metabolism		BioSystems: KEGG	0.0001989	0.3037	0.003099	0.02451	5	28	GAD1,ACAT1,HMGCS2,ACSM3,EHHADH
Pathway	1269624	Retinoid metabolism and transport		BioSystems: REACTOME	0.0002144	0.3274	0.003307	0.02615	6	44	APOM,GPC4,SDC4,RBP4,AKR1C3,LRP2
Pathway	131226	Peroxisome		BioSystems: KEGG	0.0002331	0.3559	0.003541	0.028	8	83	EPHX2,PIPOX,DAO,ACOX2,PHYH,SLC27A2,EHHADH,HAO2
Pathway	M12524	Histidine metabolism		MSigDB C2 BIOCARTA (v7.1)	0.0002365	0.3611	0.003541	0.028	5	29	AOC1,MAOA,MAOB,DDC,ASPA
Pathway	1270031	Peroxisomal lipid metabolism		BioSystems: REACTOME	0.0002365	0.3611	0.003541	0.028	5	29	ACOX2,PHYH,SLC27A2,EHHADH,HAO2
Pathway	SMP00007	Beta-Alanine Metabolism		SMPDB	0.0002539	0.3877	0.003728	0.02949	3	7	UPB1,ALDH6A1,DPYS
Pathway	1269411	FGFR3b ligand binding and activation		BioSystems: REACTOME	0.0002539	0.3877	0.003728	0.02949	3	7	FGF1,FGF9,FGFR3
Pathway	SMP00207	Prolidase Deficiency(PD)		SMPDB	0.0002927	0.4469	0.004177	0.03303	4	17	GATM,DAO,GOT1,ASS1
Pathway	MAP00410_beta_Alanine_metabolism	MAP00410 beta Alanine metabolism		GenMAPP	0.0002927	0.4469	0.004177	0.03303	4	17	GAD1,AOC1,DPYS,EHHADH
Pathway	MAP00150_Androgen_and_estrogen_metabolism	MAP00150 Androgen and estrogen metabolism		GenMAPP	0.0002927	0.4469	0.004177	0.03303	4	17	ADH6,HSD11B2,HSD17B2,ARSL
Pathway	82966	beta-Alanine metabolism		BioSystems: KEGG	0.0003276	0.5003	0.004632	0.03663	5	31	GAD1,UPB1,ALDH6A1,DPYS,EHHADH
Pathway	P04372	5-Hydroxytryptamine degredation		PantherDB	0.0003705	0.5657	0.005143	0.04067	4	18	MAOA,MAOB,ALDH8A1,ALDH1L1
Pathway	SMP00020	Arginine and Proline Metabolism		SMPDB	0.0003705	0.5657	0.005143	0.04067	4	18	GATM,DAO,GOT1,ASS1
Pathway	545366	D-glucuronate degradation		BioSystems: BIOCYC	0.0003994	0.6099	0.005445	0.04306	2	2	CRYL1,DCXR
Pathway	1270204	Biogenic amines are oxidatively deaminated to aldehydes by MAOA and MAOB		BioSystems: REACTOME	0.0003994	0.6099	0.005445	0.04306	2	2	MAOA,MAOB
Pathway	1268879	PI3K/AKT Signaling in Cancer		BioSystems: REACTOME	0.0004068	0.6211	0.005497	0.04347	8	90	ERBB3,ERBB4,MET,KL,FGF1,FGF9,FGFR3,EGF
Pathway	MAP00650_Butanoate_metabolism	MAP00650 Butanoate metabolism		GenMAPP	0.000462	0.7055	0.006188	0.04894	4	19	GAD1,ACAT1,HMGCS2,EHHADH
Pathway	M3397	Butanoate metabolism		MSigDB C2 BIOCARTA (v7.1)	0.0005112	0.7806	0.006672	0.05276	5	34	GAD1,ACAT1,HMGCS2,ACSM3,EHHADH
Pathway	82929	Pentose and glucuronate interconversions		BioSystems: KEGG	0.0005112	0.7806	0.006672	0.05276	5	34	KL,UGT2B28,CRYL1,UGT2A3,DCXR
Pathway	1270041	Synthesis of bile acids and bile salts		BioSystems: REACTOME	0.0005112	0.7806	0.006672	0.05276	5	34	ACOX2,NR1H4,SLC27A2,OSBPL3,AKR1C3
Pathway	M15394	Acute Myocardial Infarction		MSigDB C2 BIOCARTA (v7.1)	0.0005686	0.8682	0.007296	0.0577	4	20	FGB,PLG,COL4A3,COL4A4
Pathway	MAP00640_Propanoate_metabolism	MAP00640 Propanoate metabolism		GenMAPP	0.0005686	0.8682	0.007296	0.0577	4	20	ACAT1,ALDH6A1,EHHADH,PCCA
Pathway	545354	noradrenaline and adrenaline degradation		BioSystems: BIOCYC	0.0005917	0.9036	0.007467	0.05906	3	9	MAOA,MAOB,ADH6
Pathway	1270225	Erythrocytes take up oxygen and release carbon dioxide		BioSystems: REACTOME	0.0005917	0.9036	0.007467	0.05906	3	9	CA2,AQP1,SLC4A1
Pathway	1270189	Biological oxidations		BioSystems: REACTOME	0.000651	0.9941	0.008148	0.06444	13	229	GLYAT,AOC1,MAOA,MAOB,CYP3A5,ADH6,SULT1C2,UGT2B28,NR1H4,FMO1,UGT2A3,AKR7A3,CYP4F3
Pathway	MAP00252_Alanine_and_aspartate_metabolism	MAP00252 Alanine and aspartate metabolism		GenMAPP	0.0006915	1	0.008585	0.06789	4	21	GAD1,GOT1,ASPA,ASS1
Pathway	M14933	Steroid hormone biosynthesis		MSigDB C2 BIOCARTA (v7.1)	0.0007343	1	0.009043	0.07152	6	55	CYP3A5,UGT2B28,HSD11B2,HSD17B2,UGT2A3,AKR1C3
Pathway	1270144	Metabolism of vitamins and cofactors		BioSystems: REACTOME	0.0008039	1	0.009821	0.07767	11	177	ALDH1L1,APOM,GPC4,SDC4,AOX1,RBP4,CUBN,AKR1C3,LRP2,PCCA,CYB5A
Pathway	M2668	beta-Alanine metabolism		MSigDB C2 BIOCARTA (v7.1)	0.0008321	1	0.00986	0.07798	4	22	GAD1,UPB1,DPYS,EHHADH
Pathway	P02771	Pyrimidine Metabolism		PantherDB	0.000833	1	0.00986	0.07798	3	10	UPB1,ALDH6A1,DPYS
Pathway	PW:0000028	alanine and aspartate metabolic		Pathway Ontology	0.000833	1	0.00986	0.07798	3	10	GAD1,GOT1,ASS1
Pathway	1270226	Abacavir transport and metabolism		BioSystems: REACTOME	0.000833	1	0.00986	0.07798	3	10	ABCB1,SLC22A2,PCK1
Pathway	1269188	PIP3 activates AKT signaling		BioSystems: REACTOME	0.000848	1	0.009961	0.07878	9	125	ERBB3,ERBB4,MET,KL,FGF1,PIP5K1B,FGF9,FGFR3,EGF
Pathway	82940	Steroid hormone biosynthesis		BioSystems: KEGG	0.0009759	1	0.01138	0.08996	6	58	CYP3A5,UGT2B28,HSD11B2,HSD17B2,UGT2A3,AKR1C3
Pathway	M15997	Intrinsic Prothrombin Activation Pathway		MSigDB C2 BIOCARTA (v7.1)	0.0009917	1	0.01145	0.09052	4	23	FGB,KNG1,COL4A3,COL4A4
Pathway	1269384	GAB1 signalosome		BioSystems: REACTOME	0.001004	1	0.01145	0.09052	9	128	ERBB3,ERBB4,MET,KL,FGF1,PIP5K1B,FGF9,FGFR3,EGF
Pathway	1269473	PI3K/AKT activation		BioSystems: REACTOME	0.001004	1	0.01145	0.09052	9	128	ERBB3,ERBB4,MET,KL,FGF1,PIP5K1B,FGF9,FGFR3,EGF
Pathway	137918	Stabilization and expansion of the E-cadherin adherens junction		BioSystems: Pathway Interaction Database	0.001098	1	0.01225	0.09692	5	40	MET,AQP3,EFNA1,EGF,CDH1
Pathway	SMP00008	Phenylalanine and Tyrosine Metabolism		SMPDB	0.001129	1	0.01225	0.09692	3	11	HGD,HPD,GOT1
Pathway	1268827	Potassium transport channels		BioSystems: REACTOME	0.001159	1	0.01225	0.09692	2	3	KCNJ1,KCNJ16
Pathway	545342	tryptophan degradation via tryptamine		BioSystems: BIOCYC	0.001159	1	0.01225	0.09692	2	3	MAOB,DDC
Pathway	545364	thymine degradation		BioSystems: BIOCYC	0.001159	1	0.01225	0.09692	2	3	UPB1,DPYS
Pathway	142324	dopamine degradation		BioSystems: BIOCYC	0.001159	1	0.01225	0.09692	2	3	MAOA,MAOB
Pathway	142159	methionine salvage		BioSystems: BIOCYC	0.001159	1	0.01225	0.09692	2	3	BHMT,BHMT2
Pathway	703094	fatty acid alpha-oxidation		BioSystems: BIOCYC	0.001159	1	0.01225	0.09692	2	3	PHYH,SLC27A2
Pathway	545270	uracil degradation		BioSystems: BIOCYC	0.001159	1	0.01225	0.09692	2	3	UPB1,DPYS
Pathway	605866	Pyrimidine degradation, uracil => beta-alanine, thymine => 3-aminoisobutanoate		BioSystems: KEGG	0.001159	1	0.01225	0.09692	2	3	UPB1,DPYS
Pathway	1270161	Branched-chain amino acid catabolism		BioSystems: REACTOME	0.001172	1	0.01225	0.09692	4	24	ACADSB,ACAT1,BBOX1,ALDH6A1
Pathway	1270042	Synthesis of bile acids and bile salts via 7alpha-hydroxycholesterol		BioSystems: REACTOME	0.001172	1	0.01225	0.09692	4	24	ACOX2,NR1H4,SLC27A2,AKR1C3
Pathway	M232	Stabilization and expansion of the E-cadherin adherens junction		MSigDB C2 BIOCARTA (v7.1)	0.00123	1	0.01278	0.101	5	41	MET,AQP3,EFNA1,EGF,CDH1
Pathway	SMP00004	Glycine, Serine and Threonine Metabolism		SMPDB	0.001373	1	0.01408	0.1114	4	25	MAOA,GATM,BHMT,GLDC
Pathway	M699	Fatty acid metabolism		MSigDB C2 BIOCARTA (v7.1)	0.001374	1	0.01408	0.1114	5	42	ACADL,ACADSB,ACAT1,ADH6,EHHADH
Pathway	1268875	Signaling by activated point mutants of FGFR3		BioSystems: REACTOME	0.001483	1	0.0148	0.117	3	12	FGF1,FGF9,FGFR3
Pathway	1268874	FGFR3 mutant receptor activation		BioSystems: REACTOME	0.001483	1	0.0148	0.117	3	12	FGF1,FGF9,FGFR3
Pathway	PW:0000051	histidine metabolic		Pathway Ontology	0.001483	1	0.0148	0.117	3	12	AOC1,MAOB,DDC
Pathway	SMP00016	Propanoate Metabolism		SMPDB	0.001483	1	0.0148	0.117	3	12	ACAT1,ALDH6A1,PCCA
Pathway	1269302	Role of LAT2/NTAL/LAB on calcium mobilization		BioSystems: REACTOME	0.001619	1	0.016	0.1265	9	137	ERBB3,ERBB4,MET,KL,FGF1,PIP5K1B,FGF9,FGFR3,EGF
Pathway	1270190	Phase 1 - Functionalization of compounds		BioSystems: REACTOME	0.001624	1	0.016	0.1265	8	111	AOC1,MAOA,MAOB,CYP3A5,ADH6,NR1H4,FMO1,CYP4F3
Pathway	82935	Fatty acid degradation		BioSystems: KEGG	0.001699	1	0.01642	0.1298	5	44	ACADL,ACADSB,ACAT1,ADH6,EHHADH
Pathway	170720	Carbohydrate digestion and absorption		BioSystems: KEGG	0.001699	1	0.01642	0.1298	5	44	SLC2A2,ATP1A1,ATP1B1,FXYD2,G6PC
Pathway	M13720	Lysine degradation		MSigDB C2 BIOCARTA (v7.1)	0.001699	1	0.01642	0.1298	5	44	ACAT1,PIPOX,BBOX1,EHHADH,OGDHL
Pathway	147586	Collecting duct acid secretion		BioSystems: KEGG	0.001847	1	0.01727	0.1366	4	27	CLCNKB,CA2,SLC4A1,ATP6V0A4
Pathway	M106	FOXA2 and FOXA3 transcription factor networks		MSigDB C2 BIOCARTA (v7.1)	0.001881	1	0.01727	0.1366	5	45	ALDOB,HNF1B,SLC2A2,G6PC,PCK1
Pathway	782404	fatty acid beta-oxidation (peroxisome)		BioSystems: BIOCYC	0.0019	1	0.01727	0.1366	3	13	ACOX2,SLC27A2,EHHADH
Pathway	PW:0000076	pathway of urea cycle and metabolism of amino groups		Pathway Ontology	0.0019	1	0.01727	0.1366	3	13	GATM,ARG2,ASS1
Pathway	1383024	ERBB2 Activates PTK6 Signaling		BioSystems: REACTOME	0.0019	1	0.01727	0.1366	3	13	ERBB3,ERBB4,EGF
Pathway	1269415	Phospholipase C-mediated cascade; FGFR3		BioSystems: REACTOME	0.0019	1	0.01727	0.1366	3	13	FGF1,FGF9,FGFR3
Pathway	1270224	Erythrocytes take up carbon dioxide and release oxygen		BioSystems: REACTOME	0.0019	1	0.01727	0.1366	3	13	CA2,AQP1,SLC4A1
Pathway	1270223	O2/CO2 exchange in erythrocytes		BioSystems: REACTOME	0.0019	1	0.01727	0.1366	3	13	CA2,AQP1,SLC4A1
Pathway	SMP00051	Fatty acid Metabolism		SMPDB	0.0019	1	0.01727	0.1366	3	13	ACADL,ACADSB,ACAT1
Pathway	SMP00067	Aspartate Metabolism		SMPDB	0.0019	1	0.01727	0.1366	3	13	GAD1,ASPA,ASS1
Pathway	MAP00071_Fatty_acid_metabolism	MAP00071 Fatty acid metabolism		GenMAPP	0.002076	1	0.01876	0.1484	5	46	ACADL,ACAT1,CYP3A5,ADH6,EHHADH
Pathway	M19580	Pentose and glucuronate interconversions		MSigDB C2 BIOCARTA (v7.1)	0.002122	1	0.01895	0.1499	4	28	UGT2B28,CRYL1,UGT2A3,DCXR
Pathway	83002	Glyoxylate and dicarboxylate metabolism		BioSystems: KEGG	0.002122	1	0.01895	0.1499	4	28	ACAT1,GLDC,PCCA,HAO2
Pathway	PW:0000148	alkaloid biosynthetic I		Pathway Ontology	0.002287	1	0.02007	0.1587	2	4	DDC,GOT1
Pathway	PW:0000167	pantothenate and CoA biosynthetic		Pathway Ontology	0.002287	1	0.02007	0.1587	2	4	UPB1,DPYS
Pathway	1270203	Amine Oxidase reactions		BioSystems: REACTOME	0.002287	1	0.02007	0.1587	2	4	MAOA,MAOB
Pathway	PW:0000047	glycine, serine and threonine metabolic		Pathway Ontology	0.002383	1	0.02067	0.1635	3	14	AOC1,MAOB,GATM
Pathway	M6487	Platelet Amyloid Precursor Protein Pathway		MSigDB C2 BIOCARTA (v7.1)	0.002383	1	0.02067	0.1635	3	14	PLG,COL4A3,COL4A4
Pathway	M201	ErbB receptor signaling network		MSigDB C2 BIOCARTA (v7.1)	0.002935	1	0.02518	0.1991	3	15	ERBB3,ERBB4,EGF
Pathway	1383023	ERBB2 Regulates Cell Motility		BioSystems: REACTOME	0.002935	1	0.02518	0.1991	3	15	ERBB3,ERBB4,EGF
Pathway	138008	a6b1 and a6b4 Integrin signaling		BioSystems: Pathway Interaction Database	0.003113	1	0.02655	0.21	4	31	ERBB3,MET,EGF,CDH1
Pathway	M17726	Drug metabolism - other enzymes		MSigDB C2 BIOCARTA (v7.1)	0.003284	1	0.02732	0.216	5	51	UPB1,CYP3A5,UGT2B28,DPYS,UGT2A3
Pathway	835410	Thyroid hormone synthesis		BioSystems: KEGG	0.003435	1	0.02732	0.216	6	74	SLC26A4,GPX3,LRP2,ATP1A1,ATP1B1,FXYD2
Pathway	1269961	Gluconeogenesis		BioSystems: REACTOME	0.003503	1	0.02732	0.216	4	32	ALDOB,GOT1,PCK1,PCK2
Pathway	M17758	Alanine, aspartate and glutamate metabolism		MSigDB C2 BIOCARTA (v7.1)	0.003503	1	0.02732	0.216	4	32	GAD1,GOT1,ASPA,ASS1
Pathway	835392	superpathway of tryptophan utilization		BioSystems: BIOCYC	0.003503	1	0.02732	0.216	4	32	MAOA,MAOB,DDC,ADH6
Pathway	83004	Propanoate metabolism		BioSystems: KEGG	0.003503	1	0.02732	0.216	4	32	ACAT1,ALDH6A1,EHHADH,PCCA
Pathway	1269936	Organic cation/anion/zwitterion transport		BioSystems: REACTOME	0.00356	1	0.02732	0.216	3	16	SLC22A6,SLC22A2,SLC22A5
Pathway	1269394	Phospholipase C-mediated cascade: FGFR1		BioSystems: REACTOME	0.00356	1	0.02732	0.216	3	16	KL,FGF1,FGF9
Pathway	1269388	FGFR1 ligand binding and activation		BioSystems: REACTOME	0.00356	1	0.02732	0.216	3	16	KL,FGF1,FGF9
Pathway	MAP00310_Lysine_degradation	MAP00310 Lysine degradation		GenMAPP	0.00356	1	0.02732	0.216	3	16	ACAT1,BBOX1,EHHADH
Pathway	SMP00281	Anistreplase Pathway		SMPDB	0.00356	1	0.02732	0.216	3	16	FGB,PLG,KNG1
Pathway	SMP00280	Alteplase Pathway		SMPDB	0.00356	1	0.02732	0.216	3	16	FGB,PLG,KNG1
Pathway	SMP00283	Tenecteplase Pathway		SMPDB	0.00356	1	0.02732	0.216	3	16	FGB,PLG,KNG1
Pathway	SMP00282	Streptokinase Pathway		SMPDB	0.00356	1	0.02732	0.216	3	16	FGB,PLG,KNG1
Pathway	SMP00285	Reteplase Pathway		SMPDB	0.00356	1	0.02732	0.216	3	16	FGB,PLG,KNG1
Pathway	SMP00284	Urokinase Pathway		SMPDB	0.00356	1	0.02732	0.216	3	16	FGB,PLG,KNG1
Pathway	SMP00287	Tranexamic Acid Pathway		SMPDB	0.00356	1	0.02732	0.216	3	16	FGB,PLG,KNG1
Pathway	SMP00286	Aminocaproic Acid Pathway		SMPDB	0.00356	1	0.02732	0.216	3	16	FGB,PLG,KNG1
Pathway	SMP00288	Aprotinin Pathway		SMPDB	0.00356	1	0.02732	0.216	3	16	FGB,PLG,KNG1
Pathway	1269492	PI3K events in ERBB2 signaling		BioSystems: REACTOME	0.00356	1	0.02732	0.216	3	16	ERBB3,ERBB4,EGF
Pathway	154409	Gastric acid secretion		BioSystems: KEGG	0.003673	1	0.02736	0.2163	6	75	KCNJ1,KCNJ15,KCNJ16,CA2,ATP1A1,ATP1B1
Pathway	545368	ketogenesis		BioSystems: BIOCYC	0.003762	1	0.02736	0.2163	2	5	ACAT1,HMGCS2
Pathway	1269967	Fructose catabolism		BioSystems: REACTOME	0.003762	1	0.02736	0.2163	2	5	KHK,ALDOB
Pathway	1269928	Sodium-coupled sulphate, di- and tri-carboxylate transporters		BioSystems: REACTOME	0.003762	1	0.02736	0.2163	2	5	SLC13A3,SLC13A1
Pathway	1309220	Catabolism of glucuronate to xylulose-5-phosphate		BioSystems: REACTOME	0.003762	1	0.02736	0.2163	2	5	CRYL1,DCXR
Pathway	142386	tyrosine degradation		BioSystems: BIOCYC	0.003762	1	0.02736	0.2163	2	5	HGD,HPD
Pathway	M22018	Neuroregulin receptor degredation protein-1 Controls ErbB3 receptor recycling		MSigDB C2 BIOCARTA (v7.1)	0.003762	1	0.02736	0.2163	2	5	ERBB3,EGF
Pathway	522534	Tyrosine degradation, tyrosine => homogentisate		BioSystems: KEGG	0.003762	1	0.02736	0.2163	2	5	HGD,HPD
Pathway	1270227	Abacavir transmembrane transport		BioSystems: REACTOME	0.003762	1	0.02736	0.2163	2	5	ABCB1,SLC22A2
Pathway	PW:0000529	angiotensin (1-7) signaling		Pathway Ontology	0.003762	1	0.02736	0.2163	2	5	MME,ACE2
Pathway	1270032	Alpha-oxidation of phytanate		BioSystems: REACTOME	0.003762	1	0.02736	0.2163	2	5	PHYH,SLC27A2
Pathway	M4086	Propanoate metabolism		MSigDB C2 BIOCARTA (v7.1)	0.003925	1	0.0284	0.2246	4	33	ACAT1,ALDH6A1,EHHADH,PCCA
Pathway	413342	Gluconeogenesis, oxaloacetate => fructose-6P		BioSystems: KEGG	0.00426	1	0.03011	0.2382	3	17	ALDOB,PCK1,PCK2
Pathway	SMP00276	Argatroban Pathway		SMPDB	0.00426	1	0.03011	0.2382	3	17	FGB,PLG,KNG1
Pathway	SMP00278	Lepirudin Pathway		SMPDB	0.00426	1	0.03011	0.2382	3	17	FGB,PLG,KNG1
Pathway	SMP00277	Bivalirudin Pathway		SMPDB	0.00426	1	0.03011	0.2382	3	17	FGB,PLG,KNG1
Pathway	SMP00279	Ximelagatran Pathway		SMPDB	0.00426	1	0.03011	0.2382	3	17	FGB,PLG,KNG1
Pathway	138034	Arf6 signaling events		BioSystems: Pathway Interaction Database	0.00438	1	0.03082	0.2438	4	34	MET,GULP1,EFNA1,EGF
Pathway	M276	FGF signaling pathway		MSigDB C2 BIOCARTA (v7.1)	0.004563	1	0.03196	0.2528	5	55	MET,FGF1,FGF9,FGFR3,CDH1
Pathway	M86	Arf6 signaling events		MSigDB C2 BIOCARTA (v7.1)	0.00487	1	0.0333	0.2634	4	35	MET,GULP1,EFNA1,EGF
Pathway	101142	Alanine, aspartate and glutamate metabolism		BioSystems: KEGG	0.00487	1	0.0333	0.2634	4	35	GAD1,GOT1,ASPA,ASS1
Pathway	SMP00192	Hypoacetylaspartia		SMPDB	0.005038	1	0.0333	0.2634	3	18	GOT1,ASPA,ASS1
Pathway	1269416	SHC-mediated cascade:FGFR3		BioSystems: REACTOME	0.005038	1	0.0333	0.2634	3	18	FGF1,FGF9,FGFR3
Pathway	1269417	PI-3K cascade:FGFR3		BioSystems: REACTOME	0.005038	1	0.0333	0.2634	3	18	FGF1,FGF9,FGFR3
Pathway	SMP00269	Acenocoumarol Pathway		SMPDB	0.005038	1	0.0333	0.2634	3	18	FGB,PLG,KNG1
Pathway	SMP00268	Warfarin Pathway		SMPDB	0.005038	1	0.0333	0.2634	3	18	FGB,PLG,KNG1
Pathway	SMP00270	Dicumarol Pathway		SMPDB	0.005038	1	0.0333	0.2634	3	18	FGB,PLG,KNG1
Pathway	SMP00272	Enoxaparin Pathway		SMPDB	0.005038	1	0.0333	0.2634	3	18	FGB,PLG,KNG1
Pathway	SMP00271	Phenprocoumon Pathway		SMPDB	0.005038	1	0.0333	0.2634	3	18	FGB,PLG,KNG1
Pathway	SMP00274	Heparin Pathway		SMPDB	0.005038	1	0.0333	0.2634	3	18	FGB,PLG,KNG1
Pathway	SMP00273	Fondaparinux Pathway		SMPDB	0.005038	1	0.0333	0.2634	3	18	FGB,PLG,KNG1
Pathway	SMP00275	Ardeparin Pathway		SMPDB	0.005038	1	0.0333	0.2634	3	18	FGB,PLG,KNG1
Pathway	1457795	MET Receptor Activation		BioSystems: REACTOME	0.00557	1	0.03588	0.2838	2	6	MET,HPN
Pathway	413478	Malonate semialdehyde pathway, propanoyl-CoA => acetyl-CoA		BioSystems: KEGG	0.00557	1	0.03588	0.2838	2	6	ALDH6A1,EHHADH
Pathway	545347	sucrose degradation		BioSystems: BIOCYC	0.00557	1	0.03588	0.2838	2	6	KHK,ALDOB
Pathway	545353	serotonin degradation		BioSystems: BIOCYC	0.00557	1	0.03588	0.2838	2	6	MAOA,ADH6
Pathway	413351	Urea cycle		BioSystems: KEGG	0.00557	1	0.03588	0.2838	2	6	ARG2,ASS1
Pathway	782398	pyrimidine ribonucleosides degradation		BioSystems: BIOCYC	0.00557	1	0.03588	0.2838	2	6	UPB1,DPYS
Pathway	SMP00128	Gluconeogenesis		SMPDB	0.005896	1	0.03783	0.2992	3	19	G6PC,PCK1,PCK2
Pathway	82956	Lysine degradation		BioSystems: KEGG	0.006161	1	0.03936	0.3113	5	59	ACAT1,PIPOX,BBOX1,EHHADH,OGDHL
Pathway	1470917	Listeria monocytogenes entry into host cells		BioSystems: REACTOME	0.006836	1	0.04331	0.3425	3	20	MET,SH3GL2,CDH1
Pathway	1269414	FRS-mediated FGFR3 signaling		BioSystems: REACTOME	0.006836	1	0.04331	0.3425	3	20	FGF1,FGF9,FGFR3
Pathway	M11521	Glycolysis / Gluconeogenesis		MSigDB C2 BIOCARTA (v7.1)	0.007592	1	0.04719	0.3732	5	62	ADH6,ALDOB,G6PC,PCK1,PCK2
Pathway	1270233	Cell-cell junction organization		BioSystems: REACTOME	0.007592	1	0.04719	0.3732	5	62	CLDN7,CLDN10,CLDN8,CDH1,CDH6
Pathway	1269912	Cation-coupled Chloride cotransporters		BioSystems: REACTOME	0.007696	1	0.04719	0.3732	2	7	SLC12A1,SLC12A3
Pathway	MAP00632_Benzoate_degradation	MAP00632 Benzoate degradation		GenMAPP	0.007696	1	0.04719	0.3732	2	7	ACAT1,EHHADH
Pathway	1269965	Fructose metabolism		BioSystems: REACTOME	0.007696	1	0.04719	0.3732	2	7	KHK,ALDOB
Pathway	P02744	Fructose galactose metabolism		PantherDB	0.007696	1	0.04719	0.3732	2	7	KHK,ALDOB
Pathway	MAP00062_Fatty_acid_biosynthesis_path_2	MAP00062 Fatty acid biosynthesis path 2		GenMAPP	0.007696	1	0.04719	0.3732	2	7	ACAT1,EHHADH
Pathway	1270052	Vitamin D (calciferol) metabolism		BioSystems: REACTOME	0.007696	1	0.04719	0.3732	2	7	CUBN,LRP2
Pathway	82943	Arginine biosynthesis		BioSystems: KEGG	0.00786	1	0.0475	0.3756	3	21	GOT1,ARG2,ASS1
Pathway	1269395	SHC-mediated cascade:FGFR1		BioSystems: REACTOME	0.00786	1	0.0475	0.3756	3	21	KL,FGF1,FGF9
Pathway	1269396	PI-3K cascade:FGFR1		BioSystems: REACTOME	0.00786	1	0.0475	0.3756	3	21	KL,FGF1,FGF9
Pathway	1269409	Signaling by FGFR3		BioSystems: REACTOME	0.00787	1	0.0475	0.3756	4	40	GALNT3,FGF1,FGF9,FGFR3
Pubmed	23376485	Proteomic analysis of podocyte exosome-enriched fraction from normal human urine.		Pubmed	6.157e-81	2.842e-76	2.842e-76	3.216e-75	122	1744	EPHX2,RIDA,GLYAT,HGD,UPB1,DDAH1,AOC1,GIPC2,CRIM1,MAOB,ACADSB,ACAT1,AZGP1,SLC26A4,PDZK1,ACP3,GATM,ADGRG1,PBLD,ALDH1L1,DDC,PTH1R,FABP1,ABCB1,BHMT,APOM,ADH6,DEFB1,SLC22A6,HSPA12A,NPHS2,KL,FCGBP,SERPINI1,SULT1C2,CLU,PTPRO,HPD,AFM,HPGD,HPN,PVALB,GPC4,FGB,UMOD,AK4,FGF9,KHK,VAV3,MME,SLC5A12,PLG,REEP5,ALDOB,BBOX1,KLK1,ALDH6A1,PLS1,SDC4,KNG1,GOT1,CA2,SLC27A2,TRHDE,NPHS1,DPYS,EPS8L2,NPR3,RAB25,CALB1,THSD7A…
Pubmed	19056867	Large-scale proteomics and phosphoproteomics of urinary exosomes.		Pubmed	2.195e-69	1.013e-64	5.064e-65	5.731e-64	92	1016	EPHX2,RIDA,HGD,UPB1,DDAH1,GIPC2,ACAT1,SLC26A4,PDZK1,ACP3,ALDH8A1,IRF6,PBLD,ALDH1L1,DDC,FABP1,ABCB1,ADH6,SLC22A6,HSPA12A,NPHS2,KL,FCGBP,CLIC5,CLU,PTPRO,HPD,HPGD,BHMT2,UMOD,KHK,MME,SLC5A12,ADIRF,BBOX1,KLK1,PLS1,KNG1,GOT1,CA2,SLC27A2,RHCG,NPHS1,DPYS,EPS8L2,RAB25,CALB1,RAB17,SELENBP1,NEBL,ANPEP,PODXL,ANXA3,COBLL1,AOX1,RBP4,SLC13A3,XPNPEP2,CUBN,SLC44A4,AQP1,PPL,SLC3A1,TSPAN1,SLC4A1,CRYAB,MSRA,ACE2,CRY…
Pubmed	23533145	In-depth proteomic analyses of exosomes isolated from expressed prostatic secretions in urine.		Pubmed	6.321e-48	2.918e-43	9.725e-44	1.101e-42	75	1070	CHL1,EPHX2,HGD,DDAH1,AOC1,SPINK1,ACAT1,AZGP1,ACP3,GATM,ADGRG1,PBLD,ALDH1L1,FABP1,ABCB1,BHMT,DEFB1,NPHS2,KL,FCGBP,SERPINI1,CLU,AFM,HPN,BHMT2,FGB,UMOD,MME,PLG,ADIRF,ALDOB,KNG1,GOT1,TRHDE,RHCG,KRT7,KRT8,EPS8L2,NPR3,DSC1,SELENBP1,ANPEP,PODXL,HYAL1,ANXA3,TOM1L1,GPX3,RBP4,CRTAC1,CUBN,SLC44A4,SERPINA6,AQP1,TSPAN1,CRYAB,ACE2,CRYL1,FRK,CRYZ,SLC12A1,EGF,SLC12A3,ASS1,TSPAN8,AKR7A3,AKR1C3,LRP2,FOLH1B,ATP1B1,…
Pubmed	19521566	The European renal genome project: an integrated approach towards understanding the genetics of kidney development and disease.		Pubmed	5.385e-25	2.485e-20	6.214e-21	7.032e-20	27	200	PCP4,GAD1,SLC26A4,ACOX2,SLC22A6,TRPM3,KCNJ15,AK4,CA2,SLC27A2,NPHS1,SLC13A3,REN,CLDN10,CLDN8,SLC2A2,SLC3A1,SLC4A1,ACE2,SLC6A13,SLC12A3,SLCO4C1,SLC34A1,SLC22A2,SLC22A5,LRP2,CDH6
Pubmed	21386911	Identification of anchor genes during kidney development defines ontological relationships, molecular subcompartments and regulatory pathways.		Pubmed	5.819e-21	2.686e-16	5.371e-17	6.079e-16	23	179	SLC17A3,PIPOX,ALDH1L1,APOM,MAGI2,SLC22A6,PRODH2,SERPINI1,KCNJ1,HPGD,HPN,UMOD,NR1H4,SLC27A2,GULP1,SLC13A3,SLC3A1,LHX1,CRYL1,SLC6A13,SLCO4C1,CLMN,AGMAT
Pubmed	8125298	Oligo-capping: a simple method to replace the cap structure of eukaryotic mRNAs with oligoribonucleotides.		Pubmed	1.362e-18	6.285e-14	1.048e-14	1.186e-13	58	1889	GIPC2,MAOA,CYP3A5,ALDH8A1,PERP,GATM,LRRC2,ALDH1L1,PLPPR1,ACSM3,CLIC5,TRPM3,KCNJ16,RETREG1,KHK,HSD17B2,CX3CL1,ALDH6A1,SDC4,KNG1,SLC27A2,GALNT14,KRT7,KRT8,EPS8L2,SORBS2,FMO5,RAB17,PODXL,COBLL1,TOM1L1,CLDN7,ACSF2,SLC44A4,SERPINA6,CLDN8,SLC3A1,SLC7A9,ECHDC3,GBA3,RGN,CRYZ,LRRC19,CCDC198,ARSL,SLC12A3,SLC16A4,EHHADH,UGT2A3,TSPAN8,MTTP,AGMAT,OGDHL,ELF3,PCCA,DCXR,C4orf19,CDH16
Pubmed	17079272	Grainyhead-related transcription factor is required for duct maturation in the salivary gland and the kidney of the mouse.		Pubmed	2.574e-18	1.188e-13	1.697e-14	1.92e-13	11	21	SLC26A4,TFCP2L1,UMOD,KLK1,KRT7,PODXL,SLC4A1,SLC12A1,SLC12A3,SLC34A1,FXYD2
Pubmed	23362348	HNF1B controls proximal-intermediate nephron segment identity in vertebrates by regulating Notch signalling components and Irx1/2.		Pubmed	2.786e-16	1.286e-11	1.607e-12	1.819e-11	12	40	SOX9,NPHS1,HNF1B,CALB1,CUBN,TFAP2B,LHX1,SLC12A1,SLC12A3,LRP2,CDH1,CDH6
Pubmed	27820600	Direct reprogramming of fibroblasts into renal tubular epithelial cells by defined transcription factors.		Pubmed	1.902e-15	8.779e-11	9.755e-12	1.104e-10	11	34	ESRRG,GATA3,TFCP2L1,NR1H4,HNF1B,TFAP2A,TFAP2B,LHX1,SLC17A1,LRP2,EMX2
Pubmed	21082674	Comprehensive analysis of low-abundance proteins in human urinary exosomes using peptide ligand library technology, peptide OFFGEL fractionation and nanoHPLC-chip-MS/MS.		Pubmed	2.945e-15	1.359e-10	1.359e-11	1.538e-10	9	17	AOC1,SLC26A4,BHMT,ANPEP,XPNPEP2,CUBN,SLC12A1,EGF,SLC12A3
Pubmed	20424473	L-type voltage-dependent calcium channel alpha subunit 1C is a novel candidate gene associated with secondary hyperparathyroidism: an application of haplotype-based analysis for multiple linked single nucleotide polymorphisms.		Pubmed	3.42e-15	1.579e-10	1.435e-11	1.624e-10	17	144	ADGRG1,PTH1R,MET,KCNJ1,FGF1,FGF9,NPHS1,CXCL14,AQP1,SLC2A2,SLC4A1,SLC7A9,SLC6A13,SLC12A1,EGF,SLC14A1,SLC15A2
Pubmed	24952961	A high-resolution spatiotemporal atlas of gene expression of the developing mouse brain.		Pubmed	1.577e-14	7.277e-10	6.064e-11	6.863e-10	51	1850	CHL1,PCP4,SOX9,GAD1,CDS1,PDE1A,ERBB3,ERBB4,MAOA,MAOB,ESRRG,HLF,GATA3,PERP,ADGRG1,CA10,DDC,MET,PPARGC1A,CLU,PVALB,TOX3,ANGPTL3,FGF1,NR3C2,FGFR3,CX3CL1,NR1H4,CA2,TBX2,HNF1B,FMO1,NPY1R,CALB1,ANK3,GPX3,SOSTDC1,CRTAC1,XPNPEP2,TFAP2A,TFAP2B,LHX1,SLC6A13,EFNA1,EGF,ATP1A1,EMX2,CDH1,CDH6,GABRA2,TPD52L1
Pubmed	24816252	An atlas of genetic influences on human blood metabolites.		Pubmed	2.577e-14	1.189e-09	9.149e-11	1.035e-09	18	190	AOC1,ACADL,SLC17A3,CYP3A5,DDC,BHMT,ANGPTL3,KNG1,SLC27A2,ANPEP,SLC7A9,GBA3,SLC6A13,LIPC,SLC17A1,SLC22A2,SLC22A5,HAO2
Pubmed	16049112	FGF8 is required for cell survival at distinct stages of nephrogenesis and for regulation of gene expression in nascent nephrons.		Pubmed	1.142e-12	5.27e-08	3.764e-09	4.26e-08	8	19	UMOD,FGFR3,CALB1,PODXL,LHX1,SLC12A3,SLC34A1,CDH1
Pubmed	28527294	Activation of Hypoxia Signaling in Stromal Progenitors Impairs Kidney Development.		Pubmed	1.522e-12	7.026e-08	4.684e-09	5.301e-08	10	43	NPHS2,UMOD,NPHS1,CALB1,REN,AQP1,SLC12A1,SLC12A3,SLC34A1,LRP2
Pubmed	18554416	Identification of transcripts with enriched expression in the developing and adult pancreas.		Pubmed	2.038e-12	9.404e-08	5.878e-09	6.652e-08	26	576	SOX9,ACADL,SPINK1,DNAJC6,CA10,DDC,APOM,PRODH2,CLU,HPN,FGB,RAP1GAP,ANPEP,ANXA3,RBP4,SERPINA6,AQP1,SLC2A2,SLC4A1,PPP1R1A,LHX1,ACE2,CCDC198,ASS1,ELF3,CDH1
Pubmed	19855135	Inactivation of Notch signaling in the renal collecting duct causes nephrogenic diabetes insipidus in mice.		Pubmed	3.031e-12	1.399e-07	8.23e-09	9.314e-08	8	21	SLC26A4,CA2,CALB1,AQP1,AQP3,SLC4A1,SLC12A1,SLC12A3
Pubmed	22967998	Placental PPAR? regulates spatiotemporally diverse genes and a unique metabolic network.		Pubmed	7.126e-12	3.289e-07	1.827e-08	2.068e-07	14	137	CDS1,MAOA,PDZK1,ACP3,IRF6,PTGER3,ABCB1,PPARGC1A,TFCP2L1,CLU,HPGD,HSD11B2,MUC1,TACSTD2
Pubmed	21931791	Defining the molecular character of the developing and adult kidney podocyte.		Pubmed	2.198e-11	1.014e-06	5.339e-08	6.042e-07	9	39	ARHGAP24,MAGI2,NPHS2,CLIC5,PTPRO,NPHS1,NPR3,PODXL,ENPEP
Pubmed	20634891	Maternal genes and facial clefts in offspring: a comprehensive search for genetic associations in two population-based cleft studies from Scandinavia.		Pubmed	3.675e-11	1.696e-06	8.481e-08	9.598e-07	19	331	CHL1,SOX9,GAD1,PIPOX,MECOM,IRF6,ALDH1L1,ABCB1,BHMT,BHMT2,FGF1,FGF9,FGFR3,HYAL1,TFAP2A,LIPC,EGF,EMX2,CDH1
Pubmed	29113990	Notch is required for the formation of all nephron segments and primes nephron progenitors for differentiation.		Pubmed	6.105e-11	2.818e-06	1.322e-07	1.496e-06	7	18	NPHS2,HNF1B,LHX1,SLC12A1,SLC12A3,SLC34A1,CDH1
Pubmed	15760467	Searching QTL by gene expression: analysis of diabesity.		Pubmed	6.299e-11	2.907e-06	1.322e-07	1.496e-06	10	61	BHMT,APOM,DIO1,PLG,ALDOB,NR1H4,FMO1,AOX1,RGN,ASS1
Pubmed	23555292	Yap- and Cdc42-dependent nephrogenesis and morphogenesis during mouse kidney development.		Pubmed	1.088e-10	5.019e-06	2.158e-07	2.442e-06	9	46	SOX9,NPHS1,HNF1B,CALB1,SOSTDC1,LHX1,SLC12A1,SLC12A3,CDH1
Pubmed	22999937	Lgr5(+ve) stem/progenitor cells contribute to nephron formation during kidney development.		Pubmed	1.169e-10	5.395e-06	2.158e-07	2.442e-06	6	11	SOX9,UMOD,CALB1,AQP1,LRP2,CDH1
Pubmed	23684652	Genetic dissection of sodium and potassium transport along the aldosterone-sensitive distal nephron: importance in the control of blood pressure and hypertension.		Pubmed	1.169e-10	5.395e-06	2.158e-07	2.442e-06	6	11	SLC26A4,KCNJ1,NR3C2,HSD11B2,SLC12A1,SLC12A3
Pubmed	20040500	vHNF1 functions in distinct regulatory circuits to control ureteric bud branching and early nephrogenesis.		Pubmed	1.467e-10	6.77e-06	2.604e-07	2.947e-06	7	20	SOX9,GATA3,HNF1B,CALB1,LHX1,EMX2,CDH1
Pubmed	16827180	Metallothionein 1 isoform gene expression induced by cadmium in human peripheral blood lymphocytes.		Pubmed	1.966e-10	9.076e-06	3.361e-07	3.804e-06	5	6	MT1E,MT1F,MT1G,MT1H,MT1X
Pubmed	19000842	Atlas of gene expression in the developing kidney at microanatomic resolution.		Pubmed	2.899e-10	1.338e-05	4.779e-07	5.408e-06	9	51	SLC22A6,PRODH2,CLIC5,PTPRO,UMOD,HYAL1,TFAP2A,SLC12A1,SLCO4C1
Pubmed	16319116	Identification of multipotent progenitors in the embryonic mouse kidney by a novel colony-forming assay.		Pubmed	4.059e-10	1.873e-05	6.377e-07	7.217e-06	8	36	KCNJ1,PODXL,CUBN,AQP1,LHX1,SLC12A1,LRP2,CDH1
Pubmed	28577314	Transcription factor TFCP2L1 patterns cells in the mouse kidney collecting ducts.		Pubmed	4.283e-10	1.977e-05	6.377e-07	7.217e-06	6	13	SLC26A4,TFCP2L1,CA2,KRT8,CALB1,PODXL
Pubmed	29129523	Higher-Order Kidney Organogenesis from Pluripotent Stem Cells.		Pubmed	4.283e-10	1.977e-05	6.377e-07	7.217e-06	6	13	GATA3,HNF1B,CALB1,LHX1,EMX2,CDH1
Pubmed	15342556	Sequence comparison of human and mouse genes reveals a homologous block structure in the promoter regions.		Pubmed	4.988e-10	2.302e-05	7.194e-07	8.142e-06	35	1293	GLYAT,ESRRG,DNAJC6,FABP1,CLIC5,CLU,PLCL1,HSD17B2,RBM47,CX3CL1,KLK1,PLS1,RAP1GAP,RAB25,RAB17,ANK3,PODXL,NOX4,SLC13A3,REN,XPNPEP2,CUBN,PPP1R1A,SLC7A9,ECHDC3,GBA3,ARSL,SLC16A4,SLC34A1,C21orf62,UGT2A3,OGDHL,DIRAS2,C4orf19,TPD52L1
Pubmed	7495297	Analysis of the role of membrane polarity in polycystic kidney disease of transgenic SBM mice.		Pubmed	6.837e-10	3.156e-05	9.562e-07	1.082e-05	5	7	ANK2,ANK3,ATP1A1,ATP1B1,CDH1
Pubmed	22511595	Hnf1b and Pax2 cooperate to control different pathways in kidney and ureter morphogenesis.		Pubmed	8.786e-10	4.055e-05	1.193e-06	1.35e-05	7	25	HNF1B,CALB1,LHX1,SLC12A1,SLC12A3,EMX2,CDH16
Pubmed	23260145	Diabetes risk gene and Wnt effector Tcf7l2/TCF4 controls hepatic response to perinatal and adult metabolic demand.		Pubmed	1.518e-09	7.006e-05	2.002e-06	2.265e-05	8	42	SOX9,ACADL,HMGCS2,SLC27A2,SLC2A2,EHHADH,G6PC,PCK1
Pubmed	11168427	Metallothionein isogene transcription in red blood cell precursors from human cord blood.		Pubmed	1.811e-09	8.359e-05	2.322e-06	2.628e-05	5	8	MT1E,MT1F,MT1G,MT1H,MT1X
Pubmed	21343368	Genetic mosaic analysis reveals a major role for frizzled 4 and frizzled 8 in controlling ureteric growth in the developing kidney.		Pubmed	1.958e-09	9.039e-05	2.443e-06	2.765e-05	6	16	UMOD,CALB1,PODXL,SLC12A3,SLC34A1,CDH1
Pubmed	16498401	In vivo role of the HNF4alpha AF-1 activation domain revealed by exon swapping.		Pubmed	2.248e-09	0.0001037	2.73e-06	3.09e-05	8	44	HMGCS2,FABP1,KRT8,LIPC,MTTP,CDH1,PCK1,PCK2
Pubmed	20383146	New loci associated with kidney function and chronic kidney disease.		Pubmed	3.173e-09	0.0001464	3.755e-06	4.249e-05	9	66	GATM,UMOD,PIP5K1B,TBX2,NAT8B,SLC7A9,SLC6A13,SLC34A1,SLC22A2
Pubmed	20551211	Increased metallothionein gene expression, zinc, and zinc-dependent resistance to apoptosis in circulating monocytes during HIV viremia.		Pubmed	4.178e-09	0.0001929	4.592e-06	5.196e-05	4	4	MT1E,MT1G,MT1H,MT1X
Pubmed	8119276	Induction by zinc of specific metallothionein isoforms in human monocytes.		Pubmed	4.178e-09	0.0001929	4.592e-06	5.196e-05	4	4	MT1E,MT1G,MT1H,MT1X
Pubmed	21631963	DNA analysis of renal electrolyte transporter genes among patients suffering from Bartter and Gitelman syndromes: summary of mutation screening.		Pubmed	4.178e-09	0.0001929	4.592e-06	5.196e-05	4	4	CLCNKB,KCNJ1,SLC12A1,SLC12A3
Pubmed	16177003	Ubiquitous and kidney-specific subunits of vacuolar H+-ATPase are differentially expressed during nephrogenesis.		Pubmed	6.501e-09	0.0003001	6.82e-06	7.718e-05	6	19	SLC26A4,NPHS2,CA2,ATP6V0A4,LRP2,ATP1A1
Pubmed	21521738	p120 catenin is required for normal renal tubulogenesis and glomerulogenesis.		Pubmed	6.501e-09	0.0003001	6.82e-06	7.718e-05	6	19	NPHS2,NPHS1,CALB1,SLC12A3,CDH1,CDH6
Pubmed	19343046	Association study between single-nucleotide polymorphisms in 199 drug-related genes and commonly measured quantitative traits of 752 healthy Japanese subjects.		Pubmed	7.095e-09	0.0003275	7.277e-06	8.236e-05	13	193	EPHX2,CYP3A5,ALDH8A1,ALDH1L1,ABCB1,ADH6,SLC22A6,SULT1C2,ALDH6A1,SLC15A2,SLC22A2,SLC22A5,CYP4F3
Pubmed	23676500	Endothelin-2 deficiency causes growth retardation, hypothermia, and emphysema in mice.		Pubmed	7.388e-09	0.000341	7.413e-06	8.39e-05	7	33	HMGCS2,FABP1,SLC2A2,SLC10A2,ATP1A1,ATP1B1,PCK1
Pubmed	30046000	Hnf4a deletion in the mouse kidney phenocopies Fanconi renotubular syndrome.		Pubmed	8.043e-09	0.0003712	7.734e-06	8.752e-05	5	10	NPHS2,SLC12A1,SLC12A3,ASS1,LRP2
Pubmed	15178647	The developmental regulation of peroxisome proliferator-activated receptor-gamma coactivator-1alpha expression in the liver is partially dissociated from the control of gluconeogenesis and lipid catabolism.		Pubmed	8.043e-09	0.0003712	7.734e-06	8.752e-05	5	10	ACADL,ACOX2,PPARGC1A,G6PC,PCK1
Pubmed	18346943	Transcriptional profiling of Wnt4 mutant mouse kidneys identifies genes expressed during nephron formation.		Pubmed	9.24e-09	0.0004265	8.625e-06	9.761e-05	7	34	PDZK1,SDC4,HNF1B,FMO1,ANPEP,LHX1,SLC34A1
Pubmed	16502470	Human colostrum: identification of minor proteins in the aqueous phase by proteomics.		Pubmed	9.343e-09	0.0004312	8.625e-06	9.761e-05	12	162	AZGP1,CLU,AFM,FGB,PLG,KNG1,SELENBP1,ANPEP,PODXL,SERPINA6,EGF,MUC1
Pubmed	8619255	Isoform-specific expression of metallothionein mRNA in the developing and adult human kidney.		Pubmed	2.059e-08	0.0009504	1.828e-05	0.0002068	4	5	MT1E,MT1F,MT1H,MT1X
Pubmed	14675051	Comparative ontogeny, processing, and segmental distribution of the renal chloride channel, ClC-5.		Pubmed	2.059e-08	0.0009504	1.828e-05	0.0002068	4	5	UMOD,CA2,AQP1,ATP6V0A4
Pubmed	18407958	Monitoring protein-protein interactions between the mammalian integral membrane transporters and PDZ-interacting partners using a modified split-ubiquitin membrane yeast two-hybrid system.		Pubmed	2.109e-08	0.0009732	1.836e-05	0.0002078	7	38	PDZK1,CRYAB,SLC13A1,SLC34A1,PDZK1IP1,ASS1,OGDHL
Pubmed	23362349	Hepatocyte nuclear factor 1? controls nephron tubular development.		Pubmed	2.354e-08	0.001087	2.012e-05	0.0002277	6	23	PVALB,HNF1B,LHX1,SLC12A1,SLC12A3,CDH6
Pubmed	19679677	Tissue distribution, ontogeny, and hormonal regulation of xenobiotic transporters in mouse kidneys.		Pubmed	2.494e-08	0.001151	2.015e-05	0.0002281	5	12	SLC10A2,SLCO4C1,SLC15A2,SLC17A1,SLC34A1
Pubmed	27633993	Notch signaling promotes nephrogenesis by downregulating Six2.		Pubmed	2.494e-08	0.001151	2.015e-05	0.0002281	5	12	CALB1,LHX1,SLC12A1,SLC12A3,CDH1
Pubmed	2286373	Human metallothionein genes: structure of the functional locus at 16q13.		Pubmed	2.494e-08	0.001151	2.015e-05	0.0002281	5	12	MT1E,MT1F,MT1G,MT1H,MT1X
Pubmed	20855565	Common genetic variation in multiple metabolic pathways influences susceptibility to low HDL-cholesterol and coronary heart disease.		Pubmed	2.532e-08	0.001169	2.015e-05	0.0002281	8	59	PDZK1,TRPM3,CLU,ANGPTL3,NR1H4,CUBN,LIPC,MTTP
Pubmed	18614015	A mitochondrial protein compendium elucidates complex I disease biology.		Pubmed	2.674e-08	0.001234	2.092e-05	0.0002368	27	964	RIDA,DDAH1,MAOA,ACADL,MAOB,ACADSB,ACAT1,GATM,HMGCS2,ALDH1L1,ABCB1,PRODH2,PHYH,ACSM3,GLDC,AK4,BBOX1,ALDH6A1,ACSF2,ARG2,MSRA,ECHDC3,EHHADH,EFHD1,PCCA,HAO2,PCK2
Pubmed	16335952	Human plasma N-glycoproteome analysis by immunoaffinity subtraction, hydrazide chemistry, and mass spectrometry.		Pubmed	2.783e-08	0.001284	2.141e-05	0.0002422	14	257	CHL1,AZGP1,APOM,FCGBP,CLU,AFM,ANGPTL3,FGB,KNG1,ANPEP,SERPINA6,CDH6,ENPEP,SERPINA5
Pubmed	17036046	Six2 is required for suppression of nephrogenesis and progenitor renewal in the developing kidney.		Pubmed	3.118e-08	0.001439	2.359e-05	0.0002669	6	24	LHX1,SLC12A1,SLC12A3,SLC34A1,CDH1,CDH6
Pubmed	24154525	Conserved molecular signatures of neurogenesis in the hippocampal subgranular zone of rodents and primates.		Pubmed	3.184e-08	0.00147	2.371e-05	0.0002683	16	349	GAD1,CDS1,ERBB4,ACADL,ADGRG1,PHYH,SERPINI1,CLU,GLDC,PVALB,MME,GOT1,CA2,CXCL14,CRYAB,SLC14A1
Pubmed	25313862	Onecut1 and Onecut2 play critical roles in the development of the mouse retina.		Pubmed	4.074e-08	0.00188	2.942e-05	0.000333	6	25	GAD1,CLU,CALB1,TFAP2A,TFAP2B,LHX1
Pubmed	19240061	Coeliac disease-associated risk variants in TNFAIP3 and REL implicate altered NF-kappaB signalling.		Pubmed	4.08e-08	0.001883	2.942e-05	0.000333	14	265	ERBB3,ERBB4,DAO,CA10,MAGI2,TYRP1,TRPM3,KCNJ16,COBL,BBOX1,MPPED2,SORBS2,SLC15A2,EHHADH
Pubmed	22496890	Short-chain 3-hydroxyacyl-coenzyme A dehydrogenase associates with a protein super-complex integrating multiple metabolic pathways.		Pubmed	4.187e-08	0.001932	2.973e-05	0.0003364	10	117	HGD,ACADL,GATM,HMGCS2,FABP1,CUBN,ARG2,ASS1,LRP2,PCCA
Pubmed	28489004	Analogous mechanism regulating formation of neocortical basal radial glia and cerebellar Bergmann glia.		Pubmed	4.301e-08	0.001985	3.008e-05	0.0003404	8	63	ACADL,ALDH1L1,MET,CLU,CALB1,SOSTDC1,CRYAB,ASS1
Pubmed	20877624	Genetic variants in nuclear-encoded mitochondrial genes influence AIDS progression.		Pubmed	4.661e-08	0.002151	3.211e-05	0.0003634	26	926	RIDA,GLYAT,DDAH1,ACADL,ACADSB,ACAT1,GATM,HMGCS2,ALDH1L1,PRODH2,PHYH,ACSM3,GLDC,BBOX1,ALDH6A1,ACSF2,ARG2,MSRA,ECHDC3,EHHADH,EFHD1,AGMAT,OGDHL,PCCA,HAO2,PCK2
Pubmed	12388412	Localization of the ammonium transporter proteins RhBG and RhCG in mouse kidney.		Pubmed	6.138e-08	0.002833	3.989e-05	0.0004514	4	6	SLC26A4,RHCG,SLC4A1,SLC12A3
Pubmed	15550389	Cystic renal neoplasia following conditional inactivation of apc in mouse renal tubular epithelium.		Pubmed	6.138e-08	0.002833	3.989e-05	0.0004514	4	6	HNF1B,AQP3,SLC12A1,SLC12A3
Pubmed	10774930	Metallothionein isoform gene expression in zinc-treated human peripheral blood lymphocytes.		Pubmed	6.138e-08	0.002833	3.989e-05	0.0004514	4	6	MT1E,MT1F,MT1H,MT1X
Pubmed	20178365	A proteome-wide perspective on peroxisome targeting signal 1(PTS1)-Pex5p affinities.		Pubmed	6.143e-08	0.002835	3.989e-05	0.0004514	7	44	EPHX2,PIPOX,DAO,ACOX2,SLC27A2,EHHADH,HAO2
Pubmed	16973757	The expression profiles of nuclear receptors in the developing and adult kidney.		Pubmed	6.222e-08	0.002872	3.989e-05	0.0004514	5	14	NR3C2,NR1H4,PODXL,AQP3,CDH1
Pubmed	19199708	Proteomic analysis of human parotid gland exosomes by multidimensional protein identification technology (MudPIT).		Pubmed	6.466e-08	0.002984	4.088e-05	0.0004626	17	417	AZGP1,CLU,GPC4,PLG,SDC4,GOT1,KRT8,EPS8L2,ANPEP,GPX3,PPL,SLC15A2,ATP6V0A4,SLPI,ATP1A1,MUC1,TACSTD2
Pubmed	14651853	Integrated analysis of protein composition, tissue diversity, and gene regulation in mouse mitochondria.		Pubmed	1.255e-07	0.005794	7.83e-05	0.0008861	18	490	GAD1,MAOA,ACADL,ACADSB,ACAT1,PERP,GATM,HMGCS2,ACSM3,AK4,ALDH6A1,SLC27A2,ARG2,ECHDC3,EHHADH,PCCA,PCK2,CYB5A
Pubmed	30127719	Necessity and Sufficiency of Ldb1 in the Generation, Differentiation and Maintenance of Non-photoreceptor Cell Types During Retinal Development.		Pubmed	1.32e-07	0.006095	8.031e-05	0.0009088	6	30	SOX9,GAD1,CALB1,TFAP2A,TFAP2B,LHX1
Pubmed	19367412	Expression patterns of the aquaporin gene family during renal development: influence of genetic variability.		Pubmed	1.34e-07	0.006184	8.031e-05	0.0009088	5	16	SLC22A6,AQP1,AQP3,SLC34A1,LRP2
Pubmed	24142862	Cdk5 phosphorylation of ErbB4 is required for tangential migration of cortical interneurons.		Pubmed	1.34e-07	0.006184	8.031e-05	0.0009088	5	16	GAD1,ERBB3,ERBB4,PVALB,CALB1
Pubmed	17943079	Expression of BMP-7 and USAG-1 (a BMP antagonist) in kidney development and injury.		Pubmed	1.423e-07	0.006569	8.421e-05	0.000953	4	7	UMOD,CALB1,SOSTDC1,AQP1
Pubmed	19086053	Identification of new putative susceptibility genes for several psychiatric disorders by association analysis of regulatory and non-synonymous SNPs of 306 genes involved in neurotransmission and neurodevelopment.		Pubmed	1.955e-07	0.009023	0.0001142	0.001293	14	301	GAD1,MAOA,MAOB,DDC,ABCB1,MAGI2,NR3C2,KNG1,NPR1,NPR3,SERPINA6,SLC6A13,EGF,GABRA2
Pubmed	20453000	A Large-scale genetic association study of esophageal adenocarcinoma risk.		Pubmed	2.128e-07	0.009823	0.0001228	0.00139	15	351	CYP3A5,PERP,ALDH1L1,ABCB1,BHMT,PPARGC1A,SULT1C2,HSD17B2,IL17RB,SLC10A2,EGF,AKR7A3,AKR1C3,ATP1B1,CDH1
Pubmed	28334964	Mutations in the leukemia inhibitory factor receptor (LIFR) gene and Lifr deficiency cause urinary tract malformations.		Pubmed	2.593e-07	0.01197	0.0001442	0.001632	5	18	NPHS2,AQP1,SLC12A1,SLC12A3,SLC34A1
Pubmed	27591083	Loss of Zeb2 in mesenchyme-derived nephrons causes primary glomerulocystic disease.		Pubmed	2.593e-07	0.01197	0.0001442	0.001632	5	18	NPHS2,NPHS1,HNF1B,CUBN,LRP2
Pubmed	29058721	EGFR signalling controls cellular fate and pancreatic organogenesis by regulating apicobasal polarity.		Pubmed	2.593e-07	0.01197	0.0001442	0.001632	5	18	SOX9,ERBB4,EGF,MUC1,CDH1
Pubmed	2574151	Definition of mouse chromosome 1 and 3 gene linkage groups that are conserved on human chromosome 1: evidence that a conserved linkage group spans the centromere of human chromosome 1.		Pubmed	3.496e-07	0.01614	0.0001921	0.002174	5	19	MECOM,CA2,EGF,ATP1A1,ATP1B1
Pubmed	19692168	Genetic susceptibility to distinct bladder cancer subphenotypes.		Pubmed	4.175e-07	0.01927	0.0002267	0.002566	16	422	EPHX2,MAOA,GATA3,ALDH1L1,ABCB1,BHMT,MET,DIO1,HSD17B2,NR1H4,GPX3,LIPC,EGF,AKR1C3,CDH1,HAO2
Pubmed	30898767	Chronic otitis media is initiated by a bulla cavitation defect in the FBXO11 mouse model.		Pubmed	4.631e-07	0.02137	0.0002457	0.00278	5	20	MECOM,KRT7,KRT8,AQP1,CDH1
Pubmed	28760814	A Sall1-NuRD interaction regulates multipotent nephron progenitors and is required for loop of Henle formation.		Pubmed	4.631e-07	0.02137	0.0002457	0.00278	5	20	UMOD,AQP1,TFAP2B,LHX1,SLC12A1
Pubmed	15479642	Ankyrin-based subcellular gradient of neurofascin, an immunoglobulin family protein, directs GABAergic innervation at purkinje axon initial segment.		Pubmed	5.058e-07	0.02335	0.000248	0.002807	4	9	GAD1,PVALB,CALB1,ANK3
Pubmed	15385584	Co-expression of pendrin, vacuolar H+-ATPase alpha4-subunit and carbonic anhydrase II in epithelial cells of the murine endolymphatic sac.		Pubmed	5.233e-07	0.02415	0.000248	0.002807	3	3	SLC26A4,CA2,ATP6V0A4
Pubmed	25012180	Physical and functional links between anion exchanger-1 and sodium pump.		Pubmed	5.233e-07	0.02415	0.000248	0.002807	3	3	SLC4A1,ATP1A1,ATP1B1
Pubmed	30113482	Contributions of rare coding variants in hypotension syndrome genes to population blood pressure variation.		Pubmed	5.233e-07	0.02415	0.000248	0.002807	3	3	KCNJ1,SLC12A1,SLC12A3
Pubmed	24901400	High incidence of ErbB3, ErbB4, and MET expression in ovarian cancer.		Pubmed	5.233e-07	0.02415	0.000248	0.002807	3	3	ERBB3,ERBB4,MET
Pubmed	11564973	Non-association of the thiazide-sensitive Na,Cl-cotransporter gene with polygenic hypertension in both rats and humans.		Pubmed	5.233e-07	0.02415	0.000248	0.002807	3	3	SLC12A1,SLC12A3,ATP1A1
Pubmed	21209185	Neuregulin 1 promotes excitatory synapse development and function in GABAergic interneurons.		Pubmed	5.233e-07	0.02415	0.000248	0.002807	3	3	GAD1,ERBB4,PVALB
Pubmed	11693492	Acute exposure to arsenite induces metallothionein isoform-specific gene expression in human proximal tubule cells.		Pubmed	5.233e-07	0.02415	0.000248	0.002807	3	3	MT1E,MT1F,MT1X
Pubmed	12837682	Interactions of MAP17 with the NaPi-IIa/PDZK1 protein complex in renal proximal tubular cells.		Pubmed	5.233e-07	0.02415	0.000248	0.002807	3	3	PDZK1,SLC34A1,PDZK1IP1
Pubmed	21733854	DNA damage induces down-regulation of PEPCK and G6P gene expression through degradation of PGC-1alpha.		Pubmed	5.233e-07	0.02415	0.000248	0.002807	3	3	PPARGC1A,G6PC,PCK2
Pubmed	20602615	Physiogenomic analysis of statin-treated patients: domain-specific counter effects within the ACACB gene on low-density lipoprotein cholesterol?		Pubmed	5.266e-07	0.02431	0.000248	0.002807	11	192	GAD1,AOC1,CYP3A5,DAO,DDC,ABCB1,APOM,LIPC,MTTP,PCK1,GABRA2
Pubmed	24929016	GATA4 and GATA6 regulate intestinal epithelial cytodifferentiation during development.		Pubmed	5.815e-07	0.02684	0.0002711	0.003068	6	38	SOX9,FABP1,CLDN8,SLC2A2,SLC10A2,MUC1
Pubmed	18676680	Pathway-based evaluation of 380 candidate genes and lung cancer susceptibility suggests the importance of the cell cycle pathway.		Pubmed	6.012e-07	0.02775	0.0002732	0.003092	15	381	EPHX2,MAOA,GATA3,ALDH1L1,ABCB1,BHMT,MET,DIO1,HSD17B2,NR1H4,GPX3,LIPC,EGF,AKR1C3,CDH1
Pubmed	19692620	Subtype specification of GABAergic amacrine cells by the orphan nuclear receptor Nr4a2/Nurr1.		Pubmed	6.038e-07	0.02787	0.0002732	0.003092	5	21	GAD1,DDC,CALB1,TFAP2A,LHX1
Pubmed	15326289	Identification and proteomic profiling of exosomes in human urine.		Pubmed	6.038e-07	0.02787	0.0002732	0.003092	5	21	ANPEP,PODXL,AQP1,SLC12A1,MUC1
Pubmed	19170196	Polymorphisms in innate immunity genes and lung cancer risk in Xuanwei, China.		Pubmed	6.419e-07	0.02963	0.0002876	0.003255	15	383	EPHX2,MAOA,GATA3,ALDH1L1,ABCB1,BHMT,MET,DIO1,HSD17B2,NR1H4,GPX3,LIPC,EGF,AKR1C3,CDH1
Pubmed	29922981	Requirement of the Mowat-Wilson Syndrome Gene Zeb2 in the Differentiation and Maintenance of Non-photoreceptor Cell Types During Retinal Development.		Pubmed	6.826e-07	0.03151	0.0002972	0.003364	6	39	SOX9,GAD1,CALB1,TFAP2A,TFAP2B,LHX1
Pubmed	25209997	TAF4, a subunit of transcription factor II D, directs promoter occupancy of nuclear receptor HNF4A during post-natal hepatocyte differentiation.		Pubmed	6.826e-07	0.03151	0.0002972	0.003364	6	39	SOX9,FGF1,PLG,LIPC,EHHADH,CDH1
Pubmed	11208732	Chromosomal organization of candidate genes involved in cholesterol gallstone formation: a murine gallstone map.		Pubmed	6.826e-07	0.03151	0.0002972	0.003364	6	39	FABP1,NR1H4,LIPC,SLC10A2,LRP2,MUC1
Pubmed	15167446	Genetic analysis of 22 candidate genes for hypertension in the Japanese population.		Pubmed	7.763e-07	0.03583	0.0003287	0.00372	5	22	NPHS2,HSD11B2,KLK1,NPHS1,SLC12A1
Pubmed	31740596	Galnt11 regulates kidney function by glycosylating the endocytosis receptor megalin to modulate ligand binding.		Pubmed	7.763e-07	0.03583	0.0003287	0.00372	5	22	GALNT3,GALNT14,CUBN,GALNT11,LRP2
Pubmed	18391953	Rare independent mutations in renal salt handling genes contribute to blood pressure variation.		Pubmed	7.763e-07	0.03583	0.0003287	0.00372	5	22	KCNJ1,KCNJ15,KCNJ16,SLC12A1,SLC12A3
Pubmed	18358465	Canonical WNT/beta-catenin signaling is required for ureteric branching.		Pubmed	8.377e-07	0.03866	0.0003452	0.003907	4	10	CALB1,LHX1,EMX2,CDH1
Pubmed	22076439	ErbB4 modulates tubular cell polarity and lumen diameter during kidney development.		Pubmed	8.377e-07	0.03866	0.0003452	0.003907	4	10	ERBB4,AQP1,SLC12A3,CDH1
Pubmed	21062863	Jagged1 in the portal vein mesenchyme regulates intrahepatic bile duct development: insights into Alagille syndrome.		Pubmed	8.377e-07	0.03866	0.0003452	0.003907	4	10	SOX9,HNF1B,KRT8,CDH1
Pubmed	16284245	Fezl regulates the differentiation and axon targeting of layer 5 subcortical projection neurons in cerebral cortex.		Pubmed	8.651e-07	0.03993	0.0003533	0.003999	9	125	PCP4,GAD1,CRIM1,FGFR3,NPR3,CALB1,GRB14,EMX2,CDH6
Pubmed	16169070	A human protein-protein interaction network: a resource for annotating the proteome.		Pubmed	8.837e-07	0.04079	0.0003578	0.004049	34	1675	EPHX2,GLYAT,ERBB3,GIPC2,IMPA2,PIPOX,SH3YL1,APOM,PHYH,PTPRO,FGFR3,BBOX1,GOT1,CA2,CA12,KRT8,RAP1GAP,SORBS2,RAB17,SELENBP1,ANXA3,SH3GL2,TOM1L1,REN,TFAP2B,EFNA1,ARSL,PDZK1IP1,ASS1,AKR1C3,ATP1A1,ATP1B1,SERPINA5,TPD52L1
Pubmed	31062503	Foxc2 is essential for podocyte function.		Pubmed	9.853e-07	0.04548	0.0003887	0.004399	5	23	NPHS2,NPHS1,COL4A4,PODXL,EMX2
Pubmed	16998848	Transcription profile in mouse four-cell, morula, and blastocyst: Genes implicated in compaction and blastocoel formation.		Pubmed	9.853e-07	0.04548	0.0003887	0.004399	5	23	SDC4,KRT8,CLDN7,CDH1,CYB5A
Pubmed	29158444	HNF1B controls epithelial organization and cell polarity during ureteric bud branching and collecting duct morphogenesis.		Pubmed	9.853e-07	0.04548	0.0003887	0.004399	5	23	SLC26A4,HNF1B,KRT8,SLC12A1,CDH1
Pubmed	18660489	Multiple genetic variants along candidate pathways influence plasma high-density lipoprotein cholesterol concentrations.		Pubmed	1.055e-06	0.04868	0.0004104	0.004645	12	250	ACADL,HMGCS2,FABP1,PPARGC1A,ACSM3,HPGD,NR1H4,LIPC,EHHADH,G6PC,PCK1,PCK2
Pubmed	19898482	Genetic variants in TPMT and COMT are associated with hearing loss in children receiving cisplatin chemotherapy.		Pubmed	1.073e-06	0.04952	0.0004104	0.004645	7	66	SULT1C2,UGT2B28,FMO1,FMO4,FMO5,AOX1,SLC15A2
Pubmed	20679960	Pharmacogenetic analysis of lipid responses to rosuvastatin in Chinese patients.		Pubmed	1.073e-06	0.04952	0.0004104	0.004645	7	66	CYP3A5,ABCB1,PPARGC1A,ACSM3,ANGPTL3,LIPC,SLC22A2
Pubmed	16712791	Identification of intrahepatic cholangiocarcinoma related genes by comparison with normal liver tissues using expressed sequence tags.		Pubmed	1.076e-06	0.04966	0.0004104	0.004645	17	510	GLYAT,SLC17A3,SPINK1,AZGP1,PBLD,ABCB1,BHMT2,RBM47,KNG1,AOX1,MAP7,GBA3,CLMN,MTTP,HAO2,CYB5A,TPD52L1
Pubmed	19336370	Determination of genetic predisposition to patent ductus arteriosus in preterm infants.		Pubmed	1.203e-06	0.05551	0.000455	0.005149	9	130	DDC,DEFB1,HPGD,HSD11B2,FMO1,SERPINA6,TFAP2B,LIPC,AKR1C3
Pubmed	11435469	Anuria, omphalocele, and perinatal lethality in mice lacking the CD34-related protein podocalyxin.		Pubmed	1.308e-06	0.06037	0.0004754	0.00538	4	11	PTPRO,NPHS1,COL4A4,PODXL
Pubmed	19032382	Antigen expression of human eccrine sweat glands.		Pubmed	1.308e-06	0.06037	0.0004754	0.00538	4	11	KRT7,KRT8,EGF,MUC1
Pubmed	22780124	Genome-wide association study of a quantitative disordered gambling trait.		Pubmed	1.308e-06	0.06037	0.0004754	0.00538	4	11	MT1F,MT1G,MT1H,MT1X
Pubmed	20383145	Genetic loci influencing kidney function and chronic kidney disease.		Pubmed	1.308e-06	0.06037	0.0004754	0.00538	4	11	TBX2,NAT8B,SLC7A9,SLC22A2
Pubmed	23920117	A core transcriptional network composed of Pax2/8, Gata3 and Lim1 regulates key players of pro/mesonephros morphogenesis.		Pubmed	1.308e-06	0.06037	0.0004754	0.00538	4	11	GATA3,MECOM,LHX1,EMX2
Pubmed	19060336	A Wnt7b-dependent pathway regulates the orientation of epithelial cell division and establishes the cortico-medullary axis of the mammalian kidney.		Pubmed	1.888e-06	0.08716	0.0006615	0.007486	5	26	UMOD,SLC12A3,SLC34A1,CDH1,CDH6
Pubmed	19924828	Expression of PTPRO in the interneurons of adult mouse olfactory bulb.		Pubmed	1.95e-06	0.08998	0.0006615	0.007486	4	12	GAD1,PTPRO,PVALB,CALB1
Pubmed	26859289	A Point Mutation in p190A RhoGAP Affects Ciliogenesis and Leads to Glomerulocystic Kidney Defects.		Pubmed	1.95e-06	0.08998	0.0006615	0.007486	4	12	GATA3,NPHS1,PODXL,SLC12A3
Pubmed	24717294	Targeted deletion of kidney glucose-6 phosphatase leads to nephropathy.		Pubmed	1.95e-06	0.08998	0.0006615	0.007486	4	12	HMGCS2,NPHS2,PODXL,G6PC
Pubmed	20800603	Investigation of genetic susceptibility factors for human longevity - a targeted nonsynonymous SNP study.		Pubmed	2.029e-06	0.09363	0.0006615	0.007486	13	315	ERBB3,PERP,NELL1,KL,IL17RB,GALNT14,AOX1,SLC2A2,SLC3A1,FRK,EGF,LRP2,PCK1
Pubmed	23631734	Abnormal interneuron development in disrupted-in-schizophrenia-1 L100P mutant mice.		Pubmed	2.064e-06	0.09526	0.0006615	0.007486	3	4	GAD1,PVALB,CALB1
Pubmed	28340340	Selective Chemical Inhibition of PGC-1? Gluconeogenic Activity Ameliorates Type 2 Diabetes.		Pubmed	2.064e-06	0.09526	0.0006615	0.007486	3	4	PPARGC1A,G6PC,PCK1
Pubmed	19096086	Phenotype-genotype correlation in antenatal and neonatal variants of Bartter syndrome.		Pubmed	2.064e-06	0.09526	0.0006615	0.007486	3	4	CLCNKB,KCNJ1,SLC12A1
Pubmed	11591489	Na,K-ATPase expression in the mouse cochlea is not dependent on the mineralocorticoid receptor.		Pubmed	2.064e-06	0.09526	0.0006615	0.007486	3	4	NR3C2,ATP1A1,ATP1B1
Pubmed	25664690	Exploring the origin and limitations of kidney regeneration.		Pubmed	2.064e-06	0.09526	0.0006615	0.007486	3	4	CALB1,SOSTDC1,CDH1
Pubmed	8660964	The mouse BP-1 gene: structure, chromosomal localization, and regulation of expression by type I interferons and interleukin-7.		Pubmed	2.064e-06	0.09526	0.0006615	0.007486	3	4	ANK2,EGF,ENPEP
Pubmed	12367519	Hepatocyte nuclear factor 1 alpha controls renal expression of the Npt1-Npt4 anionic transporter locus.		Pubmed	2.064e-06	0.09526	0.0006615	0.007486	3	4	SLC17A3,HNF1B,SLC17A1
Pubmed	26711115	Local and Distant Input Controlling Excitation in Layer II of the Medial Entorhinal Cortex.		Pubmed	2.064e-06	0.09526	0.0006615	0.007486	3	4	GAD1,PVALB,CALB1
Pubmed	15502805	Expression of aquaporins and PAX-2 compared to CD10 and cytokeratin 7 in renal neoplasms: a tissue microarray study.		Pubmed	2.064e-06	0.09526	0.0006615	0.007486	3	4	MME,KRT7,AQP1
Pubmed	8985169	Long-chain fatty acids suppress the induction of urea cycle enzyme genes by glucocorticoid action.		Pubmed	2.064e-06	0.09526	0.0006615	0.007486	3	4	SLC22A5,ASS1,PCK1
Pubmed	17855646	Origin and fate of pendrin-positive intercalated cells in developing mouse kidney.		Pubmed	2.064e-06	0.09526	0.0006615	0.007486	3	4	SLC26A4,CALB1,SLC4A1
Pubmed	7720101	The molecular biology of the flavin-containing monooxygenases of man.		Pubmed	2.064e-06	0.09526	0.0006615	0.007486	3	4	FMO1,FMO4,FMO5
Pubmed	14760718	Screening for N-glycosylated proteins by liquid chromatography mass spectrometry.		Pubmed	2.128e-06	0.09822	0.0006727	0.007613	6	47	AZGP1,CLU,AFM,KNG1,SERPINA6,SERPINA5
Pubmed	31323030	LATS1/2 suppress NF?B and aberrant EMT initiation to permit pancreatic progenitor differentiation.		Pubmed	2.128e-06	0.09822	0.0006727	0.007613	6	47	SOX9,CLU,HNF1B,EPS8L2,MUC1,CDH1
Pubmed	27740873	Retinol Dehydrogenase-10 Regulates Pancreas Organogenesis and Endocrine Cell Differentiation via Paracrine Retinoic Acid Signaling.		Pubmed	2.302e-06	0.1063	0.0007205	0.008154	5	27	SOX9,RBP4,SLC2A2,MUC1,CDH1
Pubmed	30280653	Blood-Brain Barrier: From Physiology to Disease and Back.		Pubmed	2.31e-06	0.1066	0.0007205	0.008154	8	105	ABCB1,SLC13A3,SLC6A13,SLC15A2,SLC22A2,SLC22A5,LRP2,SLC4A4
Pubmed	19334288	Three-dimensional visualization of testis cord morphogenesis, a novel tubulogenic mechanism in development.		Pubmed	2.658e-06	0.1227	0.0008235	0.009319	10	183	SOX9,SLC27A2,TBX2,GULP1,NEBL,SLC3A1,LHX1,ACE2,SLCO4C1,ENPEP
Pubmed	19625176	PTEN identified as important risk factor of chronic obstructive pulmonary disease.		Pubmed	2.734e-06	0.1262	0.0008332	0.009429	14	376	EPHX2,GATA3,ALDH1L1,ABCB1,BHMT,MET,DIO1,HSD17B2,NR1H4,GPX3,LIPC,EGF,AKR1C3,CDH1
Pubmed	21512138	An EGFR-ERK-SOX9 signaling cascade links urothelial development and regeneration to cancer.		Pubmed	2.798e-06	0.1291	0.0008332	0.009429	4	13	SOX9,ERBB3,ERBB4,EGF
Pubmed	10866673	Hepatocyte nuclear factor 3beta (Foxa2) is dispensable for maintaining the differentiated state of the adult hepatocyte.		Pubmed	2.798e-06	0.1291	0.0008332	0.009429	4	13	DIO1,HNF1B,SLC2A2,PCK1
Pubmed	21212101	SOX9 controls epithelial branching by activating RET effector genes during kidney development.		Pubmed	2.798e-06	0.1291	0.0008332	0.009429	4	13	SOX9,GATA3,LHX1,EMX2
Pubmed	24698273	V1 and v2b interneurons secure the alternating flexor-extensor motor activity mice require for limbed locomotion.		Pubmed	2.798e-06	0.1291	0.0008332	0.009429	4	13	GAD1,GATA3,CALB1,SLC17A1
Pubmed	17314325	Pax2 and pax8 regulate branching morphogenesis and nephron differentiation in the developing kidney.		Pubmed	2.798e-06	0.1291	0.0008332	0.009429	4	13	LHX1,SLC12A1,SLC12A3,CDH1
Pubmed	20673868	A genetic association study of maternal and fetal candidate genes that predispose to preterm prelabor rupture of membranes (PROM).		Pubmed	3.075e-06	0.1419	0.0009097	0.01029	10	186	PTGER3,DEFB1,HPGD,FGB,FGF1,COL4A3,COL4A4,NPR1,REN,LIPC
Pubmed	20452482	Identification of fetal and maternal single nucleotide polymorphisms in candidate genes that predispose to spontaneous preterm labor with intact membranes.		Pubmed	3.225e-06	0.1489	0.0009482	0.01073	10	187	PTGER3,DEFB1,HPGD,FGB,FGF1,COL4A3,COL4A4,NPR1,REN,LIPC
Pubmed	25063451	The nuclear hormone receptor family member NR5A2 controls aspects of multipotent progenitor cell formation and acinar differentiation during pancreatic organogenesis.		Pubmed	3.342e-06	0.1543	0.0009764	0.01105	5	29	SOX9,SPINK1,HNF1B,MUC1,CDH1
Pubmed	21862448	Gene expression analysis of the embryonic subplate.		Pubmed	3.383e-06	0.1561	0.0009819	0.01111	10	188	GAD1,PDE1A,CRIM1,MME,NEBL,ANXA3,CRTAC1,PPP1R1A,ATP1A1,ATP1B1
Pubmed	20682687	Common variants in 40 genes assessed for diabetes incidence and response to metformin and lifestyle intervention in the diabetes prevention program.		Pubmed	3.474e-06	0.1603	0.001002	0.01134	6	51	PPARGC1A,HNF1B,LIPC,SLC22A2,PCK1,PCK2
Pubmed	23378610	Genetic variants associated with glycine metabolism and their role in insulin sensitivity and type 2 diabetes.		Pubmed	3.892e-06	0.1797	0.001072	0.01213	4	14	ALDH1L1,BHMT,BHMT2,SLC6A13
Pubmed	29596840	Reduced Abd-B Hox function during kidney development results in lineage infidelity.		Pubmed	3.892e-06	0.1797	0.001072	0.01213	4	14	KRT8,CALB1,SLC12A1,SLC12A3
Pubmed	25725069	Second-generation Notch1 activity-trap mouse line (N1IP::CreHI) provides a more comprehensive map of cells experiencing Notch1 activity.		Pubmed	3.892e-06	0.1797	0.001072	0.01213	4	14	SOX9,UMOD,CALB1,AQP1
Pubmed	21731775	Vesicoureteral reflux and other urinary tract malformations in mice compound heterozygous for Pax2 and Emx2.		Pubmed	3.892e-06	0.1797	0.001072	0.01213	4	14	GATA3,MECOM,LHX1,EMX2
Pubmed	14531806	PDZK1: I. a major scaffolder in brush borders of proximal tubular cells.		Pubmed	3.892e-06	0.1797	0.001072	0.01213	4	14	PDZK1,SLC17A1,SLC34A1,PDZK1IP1
Pubmed	15556938	Identification of FGF10 targets in the embryonic lung epithelium during bud morphogenesis.		Pubmed	3.892e-06	0.1797	0.001072	0.01213	4	14	PERP,ANXA3,TSPAN8,TACSTD2
Pubmed	28994389	Molecular architecture underlying fluid absorption by the developing inner ear.		Pubmed	3.892e-06	0.1797	0.001072	0.01213	4	14	SLC26A4,ATP6V0A4,ATP1A1,ATP1B1
Pubmed	14660441	Global expression analysis of gene regulatory pathways during endocrine pancreatic development.		Pubmed	3.901e-06	0.18	0.001072	0.01213	6	52	PDZK1,REEP5,CUBN,SERPINA6,LHX1,TSPAN8
Pubmed	21947380	Pancreatic islet and progenitor cell surface markers with cell sorting potential.		Pubmed	3.974e-06	0.1834	0.001085	0.01228	7	80	HPN,RETREG1,AQP1,ATP1B1,FXYD2,MUC1,CDH1
Pubmed	27210758	Two Pairs of ON and OFF Retinal Ganglion Cells Are Defined by Intersectional Patterns of Transcription Factor Expression.		Pubmed	4.369e-06	0.2016	0.001186	0.01342	6	53	SOX9,GATA3,PVALB,CALB1,TFAP2A,CDH6
Pubmed	9507200	Isolation of genes identified in mouse renal proximal tubule by comparing different gene expression profiles.		Pubmed	4.691e-06	0.2165	0.001239	0.01403	7	82	SPINK1,ACSM3,AQP1,SLC2A2,SLC34A1,ATP1B1,G6PC
Pubmed	26243870	Yap and Taz are required for Ret-dependent urinary tract morphogenesis.		Pubmed	4.719e-06	0.2178	0.001239	0.01403	5	31	GATA3,RNF128,CALB1,CDH1,CDH16
Pubmed	19898483	Etv4 and Etv5 are required downstream of GDNF and Ret for kidney branching morphogenesis.		Pubmed	4.719e-06	0.2178	0.001239	0.01403	5	31	MET,CA2,CALB1,ARG2,LHX1
Pubmed	16498405	Large-scale identification of genes implicated in kidney glomerulus development and function.		Pubmed	4.719e-06	0.2178	0.001239	0.01403	5	31	NPHS2,NPHS1,COL4A4,PODXL,REN
Pubmed	17328885	Prospective isolation and global gene expression analysis of definitive and visceral endoderm.		Pubmed	4.719e-06	0.2178	0.001239	0.01403	5	31	TMEM30B,SPINK1,KRT7,SH3GL2,CLDN8
Pubmed	18647754	Mice lacking the schizophrenia-associated protein FEZ1 manifest hyperactivity and enhanced responsiveness to psychostimulants.		Pubmed	5.129e-06	0.2367	0.001239	0.01403	3	5	GAD1,PVALB,CALB1
Pubmed	15682390	Developmental profile of ErbB receptors in murine central nervous system: implications for functional interactions.		Pubmed	5.129e-06	0.2367	0.001239	0.01403	3	5	GAD1,ERBB3,ERBB4
Pubmed	27585590	Precommitment low-level Neurog3 expression defines a long-lived mitotic endocrine-biased progenitor pool that drives production of endocrine-committed cells.		Pubmed	5.129e-06	0.2367	0.001239	0.01403	3	5	SOX9,MUC1,CDH1
Pubmed	27835672	The Expression of Water and Ion Channels in Diffuse Alveolar Damage Is Not Dependent on DAD Etiology.		Pubmed	5.129e-06	0.2367	0.001239	0.01403	3	5	AQP1,AQP3,ATP1A1
Pubmed	8311461	A nomenclature for the mammalian flavin-containing monooxygenase gene family based on amino acid sequence identities.		Pubmed	5.129e-06	0.2367	0.001239	0.01403	3	5	FMO1,FMO4,FMO5
Pubmed	12939402	Heregulin targets gamma-catenin to the nucleolus by a mechanism dependent on the DF3/MUC1 oncoprotein.		Pubmed	5.129e-06	0.2367	0.001239	0.01403	3	5	ERBB3,ERBB4,MUC1
Pubmed	16928804	Expression of the ammonia transporter, rh C glycoprotein, in normal and neoplastic human kidney.		Pubmed	5.129e-06	0.2367	0.001239	0.01403	3	5	SLC26A4,RHCG,CALB1
Pubmed	25587123	Ret is critical for podocyte survival following glomerular injury in vivo.		Pubmed	5.129e-06	0.2367	0.001239	0.01403	3	5	NPHS2,NPHS1,CDH1
Pubmed	8128486	The mammalian flavin-containing monooxygenases: molecular characterization and regulation of expression.		Pubmed	5.129e-06	0.2367	0.001239	0.01403	3	5	FMO1,FMO4,FMO5
Pubmed	15744310	Nutrient control of glucose homeostasis through a complex of PGC-1alpha and SIRT1.		Pubmed	5.129e-06	0.2367	0.001239	0.01403	3	5	PPARGC1A,G6PC,PCK1
Pubmed	2885848	Genes encoding alpha and beta subunits of Na,K-ATPase are located on three different chromosomes in the mouse.		Pubmed	5.129e-06	0.2367	0.001239	0.01403	3	5	EGF,ATP1A1,ATP1B1
Pubmed	17467685	Cellular mechanisms of Mllerian duct formation in the mouse.		Pubmed	5.129e-06	0.2367	0.001239	0.01403	3	5	KRT8,LHX1,CDH1
Pubmed	27582101	A fate-mapping approach reveals the composite origin of the connecting tubule and alerts on "single-cell"-specific KO model of the distal nephron.		Pubmed	5.129e-06	0.2367	0.001239	0.01403	3	5	SLC26A4,SLC4A1,SLC12A3
Pubmed	20812968	Modulation of metallothionein isoforms is associated with collagen deposition in proliferating keloid fibroblasts in vitro.		Pubmed	5.129e-06	0.2367	0.001239	0.01403	3	5	MT1F,MT1G,MT1X
Pubmed	8576175	Expression and biological activity of mouse fibroblast growth factor-9.		Pubmed	5.129e-06	0.2367	0.001239	0.01403	3	5	FGF1,FGF9,FGFR3
Pubmed	30049711	Neuregulin 3 promotes excitatory synapse formation on hippocampal interneurons.		Pubmed	5.129e-06	0.2367	0.001239	0.01403	3	5	GAD1,ERBB4,PVALB
Pubmed	22110055	FGF8 is essential for formation of the ductal system in the male reproductive tract.		Pubmed	5.274e-06	0.2434	0.001242	0.01406	4	15	GATA3,FGFR3,LHX1,EMX2
Pubmed	30562487	Ankyrin-G regulated epithelial phenotype is required for mouse lens morphogenesis and growth.		Pubmed	5.274e-06	0.2434	0.001242	0.01406	4	15	ANK2,ANK3,ATP1A1,CDH1
Pubmed	7628695	Targeted disruption of the glucocorticoid receptor gene blocks adrenergic chromaffin cell development and severely retards lung maturation.		Pubmed	5.274e-06	0.2434	0.001242	0.01406	4	15	SLC17A1,SLC34A1,G6PC,PCK1
Pubmed	28167773	Intestinal NCoR1, a regulator of epithelial cell maturation, controls neonatal hyperbilirubinemia.		Pubmed	5.274e-06	0.2434	0.001242	0.01406	4	15	FABP1,NOX4,EHHADH,LRP2
Pubmed	16675530	Sprouty2 is involved in male sex organogenesis by controlling fibroblast growth factor 9-induced mesonephric cell migration to the developing testis.		Pubmed	5.274e-06	0.2434	0.001242	0.01406	4	15	SOX9,FGF9,LHX1,EGF
Pubmed	16341674	Transcriptome analysis of human gastric cancer.		Pubmed	5.521e-06	0.2548	0.001289	0.01458	20	770	ERBB3,ACAT1,AZGP1,ACSM3,FCGBP,SULT1C2,AK4,ADIRF,RBM47,KRT8,RAP1GAP,PRR15L,CLDN7,TSPAN1,MT1G,AKR7A3,AGMAT,ATP1B1,TACSTD2,PCK1
Pubmed	18356246	Tbx3 controls the fate of hepatic progenitor cells in liver development by suppressing p19ARF expression.		Pubmed	5.556e-06	0.2565	0.001289	0.01458	5	32	MET,TBX2,KRT7,HNF1B,CDH1
Pubmed	27806288	Onset of Spinal Cord Astrocyte Precursor Emigration from the Ventricular Zone Involves the Zeb1 Transcription Factor.		Pubmed	5.556e-06	0.2565	0.001289	0.01458	5	32	SOX9,GATA3,ALDH1L1,FGFR3,CDH1
Pubmed	24058167	Lung epithelial branching program antagonizes alveolar differentiation.		Pubmed	6.506e-06	0.3003	0.001486	0.01682	5	33	SOX9,CLU,PODXL,AQP1,CDH1
Pubmed	30208054	The Trim family of genes and the retina: Expression and functional characterization.		Pubmed	6.506e-06	0.3003	0.001486	0.01682	5	33	GAD1,CLU,CALB1,TFAP2A,CDH6
Pubmed	26288816	Fate Specification of Neural Plate Border by Canonical Wnt Signaling and Grhl3 is Crucial for Neural Tube Closure.		Pubmed	6.506e-06	0.3003	0.001486	0.01682	5	33	SOX9,KRT8,TFAP2A,EMX2,CDH1
Pubmed	17229764	Notch2, but not Notch1, is required for proximal fate acquisition in the mammalian nephron.		Pubmed	6.988e-06	0.3225	0.001543	0.01746	4	16	KRT8,LHX1,CDH1,CDH6
Pubmed	26657766	Pdx1 regulates pancreas tubulogenesis and E-cadherin expression.		Pubmed	6.988e-06	0.3225	0.001543	0.01746	4	16	SOX9,PODXL,MUC1,CDH1
Pubmed	20713522	Tbr2-positive intermediate (basal) neuronal progenitors safeguard cerebral cortex expansion by controlling amplification of pallial glutamatergic neurons and attraction of subpallial GABAergic interneurons.		Pubmed	6.988e-06	0.3225	0.001543	0.01746	4	16	GAD1,ERBB4,PVALB,CALB1
Pubmed	31669249	Sox9 in mouse urogenital sinus epithelium mediates elongation of prostatic buds and expression of genes involved in epithelial cell migration.		Pubmed	6.988e-06	0.3225	0.001543	0.01746	4	16	SOX9,SBSPON,CXCL14,CDH1
Pubmed	21466799	XY Sox9 embryonic loss-of-function mouse mutants show complete sex reversal and produce partially fertile XY oocytes.		Pubmed	6.988e-06	0.3225	0.001543	0.01746	4	16	SOX9,ERBB3,FGF9,EMX2
Pubmed	20978075	The transcription factor grainyhead-like 2 regulates the molecular composition of the epithelial apical junctional complex.		Pubmed	6.988e-06	0.3225	0.001543	0.01746	4	16	AQP1,SLC12A1,SLC12A3,CDH1
Pubmed	25993409	Hairy/Enhancer-of-Split MEGANE and Proneural MASH1 Factors Cooperate Synergistically in Midbrain GABAergic Neurogenesis.		Pubmed	6.988e-06	0.3225	0.001543	0.01746	4	16	GAD1,GATA3,CALB1,LHX1
Pubmed	31536960	Rewiring of the Human Mitochondrial Interactome during Neuronal Reprogramming Reveals Regulators of the Respirasome and Neurogenesis.		Pubmed	7.937e-06	0.3663	0.001744	0.01974	21	858	EPHX2,DDAH1,ACADSB,ACAT1,AK4,MME,GOT1,CA2,NEBL,ACSF2,SLC4A1,CRYZ,EHHADH,P3H2,ASS1,AGMAT,ATP1A1,ATP1B1,DCXR,PCK2,CYB5A
Pubmed	20843830	The planar cell polarity gene Vangl2 is required for mammalian kidney-branching morphogenesis and glomerular maturation.		Pubmed	8.103e-06	0.374	0.001772	0.02005	7	89	MET,UMOD,NR3C2,NPHS1,HNF1B,EGF,ATP1A1
Pubmed	19906978	Brn3a and Nurr1 mediate a gene regulatory pathway for habenula development.		Pubmed	8.138e-06	0.3756	0.001772	0.02005	9	164	TSPAN12,MAOA,ADGRG1,KL,TRPM3,VAV3,NPR1,SOSTDC1,CUBN
Pubmed	14718574	The human plasma proteome: a nonredundant list developed by combination of four separate sources.		Pubmed	8.548e-06	0.3945	0.001852	0.02096	9	165	AZGP1,CLU,FGB,ALDH6A1,KNG1,CA2,RBP4,MT1X,SERPINA5
Pubmed	22991445	Essential roles of the histone methyltransferase ESET in the epigenetic control of neural progenitor cells during development.		Pubmed	8.782e-06	0.4053	0.001894	0.02143	5	35	SOX9,ALDH1L1,CRTAC1,SLC14A1,EMX2
Pubmed	17205580	The expression pattern of nuclear receptors during cerebellar development.		Pubmed	9.08e-06	0.4191	0.001922	0.02176	4	17	ESRRG,PVALB,NR1H4,CALB1
Pubmed	19641107	Neuronal 3',3,5-triiodothyronine (T3) uptake and behavioral phenotype of mice deficient in Mct8, the neuronal T3 transporter mutated in Allan-Herndon-Dudley syndrome.		Pubmed	9.08e-06	0.4191	0.001922	0.02176	4	17	GAD1,PVALB,CALB1,SLCO4C1
Pubmed	18353863	Deafness in mice lacking the T-box transcription factor Tbx18 in otic fibrocytes.		Pubmed	9.08e-06	0.4191	0.001922	0.02176	4	17	SOX9,AQP1,ATP1A1,CDH1
Pubmed	16472605	The transcription factor hepatocyte nuclear factor-6 controls the development of pancreatic ducts in the mouse.		Pubmed	9.08e-06	0.4191	0.001922	0.02176	4	17	HNF1B,AQP1,SLC4A4,MUC1
Pubmed	27689697	Mtu1-Mediated Thiouridine Formation of Mitochondrial tRNAs Is Required for Mitochondrial Translation and Is Involved in Reversible Infantile Liver Injury.		Pubmed	9.389e-06	0.4333	0.001979	0.02239	7	91	EPHX2,HMGCS2,PPARGC1A,AOX1,GPX3,MSRA,G6PC
Pubmed	27626380	High-throughput discovery of novel developmental phenotypes.		Pubmed	9.751e-06	0.4501	0.002037	0.02305	31	1627	SLC17A3,GATM,PIPOX,LRRC2,ALDH1L1,F2RL1,FABP1,BHMT,PHYH,CLU,TOX3,FGF9,BBOX1,KRT7,KRT8,A1CF,SORBS2,ANXA3,SH3GL2,GPX3,RBP4,PRR15L,SOSTDC1,SLC13A3,ACSF2,AQP3,SLC2A2,CLMN,ATP6V0A4,ELF3,DCXR
Pubmed	29993278	In vivo evidence for an interplay of FGF23/Klotho/PTH axis on the phosphate handling in renal proximal tubules.		Pubmed	1.02e-05	0.4706	0.002037	0.02305	3	6	PTH1R,KL,SLC34A1
Pubmed	11694877	Cardiac malformations, adrenal agenesis, neural crest defects and exencephaly in mice lacking Cited2, a new Tfap2 co-activator.		Pubmed	1.02e-05	0.4706	0.002037	0.02305	3	6	ERBB3,TFAP2A,TFAP2B
Pubmed	10574949	Mapping ligand binding domains in chimeric fibroblast growth factor receptor molecules. Multiple regions determine ligand binding specificity.		Pubmed	1.02e-05	0.4706	0.002037	0.02305	3	6	FGF1,FGF9,FGFR3
Pubmed	30083275	The S100A4 Protein Signals through the ErbB4 Receptor to Promote Neuronal Survival.		Pubmed	1.02e-05	0.4706	0.002037	0.02305	3	6	ERBB3,ERBB4,EGF
Pubmed	16275913	WNK3 kinase is a positive regulator of NKCC2 and NCC, renal cation-Cl- cotransporters required for normal blood pressure homeostasis.		Pubmed	1.02e-05	0.4706	0.002037	0.02305	3	6	SLC12A1,SLC12A3,CDH1
Pubmed	30126902	ROCK-nmMyoII, Notch and		Pubmed	1.02e-05	0.4706	0.002037	0.02305	3	6	SOX9,MUC1,CDH1
Pubmed	2897103	Chromosomal location of Evi-1, a common site of ecotropic viral integration in AKXD murine myeloid tumors.		Pubmed	1.02e-05	0.4706	0.002037	0.02305	3	6	MECOM,CA2,EGF
Pubmed	21177257	Parkin degrades estrogen-related receptors to limit the expression of monoamine oxidases.		Pubmed	1.02e-05	0.4706	0.002037	0.02305	3	6	MAOA,MAOB,ESRRG
Pubmed	27471003	Activation of farnesoid X receptor promotes triglycerides lowering by suppressing phospholipase A2 G12B expression.		Pubmed	1.02e-05	0.4706	0.002037	0.02305	3	6	PPARGC1A,NR1H4,MTTP
Pubmed	12527699	Identification of novel variants of the flavin-containing monooxygenase gene family in African Americans.		Pubmed	1.02e-05	0.4706	0.002037	0.02305	3	6	FMO1,FMO4,FMO5
Pubmed	11278868	Transgenic MUC1 interacts with epidermal growth factor receptor and correlates with mitogen-activated protein kinase activation in the mouse mammary gland.		Pubmed	1.02e-05	0.4706	0.002037	0.02305	3	6	ERBB3,ERBB4,MUC1
Pubmed	19874574	Genetical genomic determinants of alcohol consumption in rats and humans.		Pubmed	1.131e-05	0.5221	0.00225	0.02547	8	130	GAD1,MAOA,MAOB,DDC,ADH6,NPY1R,SLC6A13,GABRA2
Pubmed	20201926	Human variation in alcohol response is influenced by variation in neuronal signaling genes.		Pubmed	1.139e-05	0.5258	0.002257	0.02554	9	171	HGD,GAD1,HLF,GOT1,COL4A3,REN,EGF,ASPA,AKR1C3
Pubmed	19403103	Intrahepatic bile ducts develop according to a new mode of tubulogenesis regulated by the transcription factor SOX9.		Pubmed	1.16e-05	0.5354	0.002276	0.02576	4	18	SOX9,HNF1B,MUC1,CDH1
Pubmed	23266329	Kruppel-like factor 5 controls villus formation and initiation of cytodifferentiation in the embryonic intestinal epithelium.		Pubmed	1.164e-05	0.5371	0.002276	0.02576	5	37	SOX9,KRT8,EPS8L2,ELF3,CDH1
Pubmed	23592779	Cubilin, a high affinity receptor for fibroblast growth factor 8, is required for cell survival in the developing vertebrate head.		Pubmed	1.164e-05	0.5371	0.002276	0.02576	5	37	FGFR3,CUBN,TFAP2A,LRP2,EMX2
Pubmed	23251661	Novel genetic loci identified for the pathophysiology of childhood obesity in the Hispanic population.		Pubmed	1.259e-05	0.5812	0.002452	0.02775	20	815	CHL1,RIDA,TMEM30B,ERBB3,ARHGAP24,SPINK1,MAGI2,NELL1,HPD,PVALB,RAB17,SH3GL2,TOM1L1,NOX4,SLC4A1,CRYL1,EFNA1,LIPC,SHANK2,EMX2
Pubmed	22643896	O-glycosylation modulates integrin and FGF signalling by influencing the secretion of basement membrane components.		Pubmed	1.331e-05	0.6144	0.002571	0.02909	5	38	GALNT3,FGF1,GALNT14,GALNT11,CDH1
Pubmed	29798841	Nardilysin inhibits pancreatitis and suppresses pancreatic ductal adenocarcinoma initiation in mice.		Pubmed	1.331e-05	0.6144	0.002571	0.02909	5	38	SOX9,CX3CL1,KRT7,HNF1B,CDH1
Pubmed	21888903	Ngn3(+) endocrine progenitor cells control the fate and morphogenesis of pancreatic ductal epithelium.		Pubmed	1.46e-05	0.6739	0.002739	0.031	4	19	SOX9,HNF1B,MUC1,CDH1
Pubmed	20410112	Fgfr2 is required for the development of the medial prefrontal cortex and its connections with limbic circuits.		Pubmed	1.46e-05	0.6739	0.002739	0.031	4	19	GAD1,PVALB,CALB1,CDH6
Pubmed	21052031	Identification of genetic factors associated with susceptibility to angiotensin-converting enzyme inhibitors-induced cough.		Pubmed	1.46e-05	0.6739	0.002739	0.031	4	19	PTGER3,MME,XPNPEP2,ACE2
Pubmed	22529374	Mind bomb 1 is required for pancreatic ?-cell formation.		Pubmed	1.46e-05	0.6739	0.002739	0.031	4	19	SOX9,HNF1B,MUC1,CDH1
Pubmed	30040984	NRG1 signalling regulates the establishment of Sertoli cell stock in the mouse testis.		Pubmed	1.46e-05	0.6739	0.002739	0.031	4	19	SOX9,ERBB3,FGF9,CDH1
Pubmed	29474907	Cell-Intrinsic Control of Interneuron Migration Drives Cortical Morphogenesis.		Pubmed	1.46e-05	0.6739	0.002739	0.031	4	19	GAD1,ERBB4,PVALB,CALB1
Pubmed	19841136	Keratins regulate protein biosynthesis through localization of GLUT1 and -3 upstream of AMP kinase and Raptor.		Pubmed	1.46e-05	0.6739	0.002739	0.031	4	19	KRT7,KRT8,SLC2A2,CDH1
Pubmed	22510988	Identification of molecular compartments and genetic circuitry in the developing mammalian kidney.		Pubmed	1.517e-05	0.7001	0.002835	0.03208	5	39	TFAP2B,CLDN8,LHX1,SLC12A1,EMX2
Pubmed	31152445	Diverse spinal commissural neuron populations revealed by fate mapping and molecular profiling using a novel Robo3		Pubmed	1.722e-05	0.7949	0.00317	0.03588	5	40	CHL1,GAD1,CALB1,THSD7A,LHX1
Pubmed	23263486	Genome-wide association analyses identify 18 new loci associated with serum urate concentrations.		Pubmed	1.728e-05	0.7975	0.00317	0.03588	6	67	SLC17A3,PDZK1,HLF,A1CF,FRK,SLC17A1
Pubmed	29679048	Disruption of Hox9,10,11 function results in cellular level lineage infidelity in the kidney.		Pubmed	1.774e-05	0.8186	0.00317	0.03588	3	7	CALB1,SLC12A1,CDH1
Pubmed	7477375	Multiple essential functions of neuregulin in development.		Pubmed	1.774e-05	0.8186	0.00317	0.03588	3	7	ERBB3,ERBB4,TFAP2A
Pubmed	21347296	Evidence for mesenchymal-epithelial transition associated with mouse hepatic stem cell differentiation.		Pubmed	1.774e-05	0.8186	0.00317	0.03588	3	7	KRT7,KRT8,CDH1
Pubmed	16513443	Organic anion transporting polypeptide 1B1 activity classified by SLCO1B1 genotype influences atrasentan pharmacokinetics.		Pubmed	1.774e-05	0.8186	0.00317	0.03588	3	7	CYP3A5,ABCB1,SLC22A2
Pubmed	26385183	Role of Asxl1 in kidney podocyte development via its interaction with Wtip.		Pubmed	1.774e-05	0.8186	0.00317	0.03588	3	7	NPHS2,NPHS1,PODXL
Pubmed	28924206	Ephrin-A2 regulates excitatory neuron differentiation and interneuron migration in the developing neocortex.		Pubmed	1.774e-05	0.8186	0.00317	0.03588	3	7	GAD1,ALDH1L1,CALB1
Pubmed	29467543	AP-2? Expression in Developing Retina: Contributing to the Molecular Diversity of Amacrine Cells.		Pubmed	1.774e-05	0.8186	0.00317	0.03588	3	7	GAD1,TFAP2A,TFAP2B
Pubmed	25885434	Analysis of Kif5b expression during mouse kidney development.		Pubmed	1.774e-05	0.8186	0.00317	0.03588	3	7	UMOD,SLC12A3,ATP1A1
Pubmed	16916647	Substrate and functional diversity of lysine acetylation revealed by a proteomics survey.		Pubmed	1.793e-05	0.8275	0.00317	0.03588	9	181	MAOB,ACADSB,ACAT1,HMGCS2,ACOX2,SLC27A2,MSRA,EHHADH,CYB5A
Pubmed	17067568	CYP26A1 and CYP26C1 cooperatively regulate anterior-posterior patterning of the developing brain and the production of migratory cranial neural crest cells in the mouse.		Pubmed	1.813e-05	0.837	0.00317	0.03588	4	20	SOX9,TFAP2A,EMX2,CDH1
Pubmed	28215940	Elf5 is a principal cell lineage specific transcription factor in the kidney that contributes to Aqp2 and Avpr2 gene expression.		Pubmed	1.813e-05	0.837	0.00317	0.03588	4	20	CA2,KRT8,CALB1,CDH16
Pubmed	26116666	Fat4/Dchs1 signaling between stromal and cap mesenchyme cells influences nephrogenesis and ureteric bud branching.		Pubmed	1.813e-05	0.837	0.00317	0.03588	4	20	SOX9,UMOD,KRT8,CDH1
Pubmed	24776795	Astrocyte-encoded positional cues maintain sensorimotor circuit integrity.		Pubmed	1.813e-05	0.837	0.00317	0.03588	4	20	ESRRG,PVALB,CALB1,ANK3
Pubmed	26033091	Transcription factors SOX4 and SOX9 cooperatively control development of bile ducts.		Pubmed	1.813e-05	0.837	0.00317	0.03588	4	20	SOX9,HNF1B,MUC1,CDH1
Pubmed	24453340	Involvement of Bcl-2-associated transcription factor 1 in the differentiation of early-born retinal cells.		Pubmed	1.813e-05	0.837	0.00317	0.03588	4	20	SOX9,CALB1,TFAP2A,LHX1
Pubmed	22001757	Genome-wide association study identifies loci influencing concentrations of liver enzymes in plasma.		Pubmed	1.882e-05	0.8687	0.003278	0.0371	6	68	SOX9,ALDOB,SLC2A2,EFNA1,EFHD1,CDH6
Pubmed	19878569	Candidate genetic analysis of plasma high-density lipoprotein-cholesterol and severity of coronary atherosclerosis.		Pubmed	1.949e-05	0.8993	0.003368	0.03812	5	41	ABCB1,KL,CLU,CUBN,LIPC
Pubmed	30135482	Endocrine lineage biases arise in temporally distinct endocrine progenitors during pancreatic morphogenesis.		Pubmed	1.949e-05	0.8993	0.003368	0.03812	5	41	SOX9,TOX3,GPX3,MUC1,CDH1
Pubmed	18824566	AP-2 factors act in concert with Notch to orchestrate terminal differentiation in skin epidermis.		Pubmed	2.226e-05	1	0.003749	0.04243	4	21	GATA3,KRT8,TFAP2A,CDH1
Pubmed	27993987	The mammal-specific Pdx1 Area II enhancer has multiple essential functions in early endocrine cell specification and postnatal ?-cell maturation.		Pubmed	2.226e-05	1	0.003749	0.04243	4	21	SOX9,HNF1B,SLC2A2,CDH1
Pubmed	29330353	Afadin and RhoA control pancreatic endocrine mass via lumen morphogenesis.		Pubmed	2.226e-05	1	0.003749	0.04243	4	21	SOX9,PODXL,MUC1,CDH1
Pubmed	10579907	Phospholipase C-gamma as a signal-transducing element.		Pubmed	2.226e-05	1	0.003749	0.04243	4	21	KL,FGF1,FGF9,FGFR3
Pubmed	20833365	FGF9 suppresses meiosis and promotes male germ cell fate in mice.		Pubmed	2.226e-05	1	0.003749	0.04243	4	21	SOX9,FGF9,FGFR3,CDH1
Pubmed	24603431	Mitogen-activated protein kinase (MAPK) pathway regulates branching by remodeling epithelial cell adhesion.		Pubmed	2.226e-05	1	0.003749	0.04243	4	21	UMOD,CALB1,CLDN7,CDH1
Pubmed	27385012	Sip1 regulates the generation of the inner nuclear layer retinal cell lineages in mammals.		Pubmed	2.226e-05	1	0.003749	0.04243	4	21	GAD1,CALB1,TFAP2A,TFAP2B
Pubmed	20339536	Genome-wide association of lipid-lowering response to statins in combined study populations.		Pubmed	2.615e-05	1	0.003895	0.04408	6	72	CHL1,COBLL1,GRB14,SOSTDC1,CLDN8,CLMN
Pubmed	15084671	A proteomic analysis of human bile.		Pubmed	2.703e-05	1	0.003895	0.04408	4	22	AZGP1,FCGBP,ANPEP,ACE2
Pubmed	18094249	Lim1 is essential for the correct laminar positioning of retinal horizontal cells.		Pubmed	2.703e-05	1	0.003895	0.04408	4	22	PCP4,SOX9,CALB1,LHX1
Pubmed	23117660	Transcriptome analysis for Notch3 target genes identifies Grip2 as a novel regulator of myogenic response in the cerebrovasculature.		Pubmed	2.703e-05	1	0.003895	0.04408	4	22	PERP,TBX2,SORBS2,CDH6
Pubmed	18250098	Activation of beta-catenin signaling by Rspo1 controls differentiation of the mammalian ovary.		Pubmed	2.703e-05	1	0.003895	0.04408	4	22	SOX9,FGF9,EMX2,CDH1
Pubmed	28818950	Elimination of the male reproductive tract in the female embryo is promoted by COUP-TFII in mice.		Pubmed	2.703e-05	1	0.003895	0.04408	4	22	FGF1,TFAP2A,EGF,FOLH1B
Pubmed	12539042	HIV-1 Tat reprograms immature dendritic cells to express chemoattractants for activated T cells and macrophages.		Pubmed	2.768e-05	1	0.003895	0.04408	5	44	MT1E,MT1F,MT1G,MT1H,MT1X
Pubmed	24993945	A crucial role for polysialic acid in developmental interneuron migration and the establishment of interneuron densities in the mouse prefrontal cortex.		Pubmed	2.821e-05	1	0.003895	0.04408	3	8	GAD1,PVALB,CALB1
Pubmed	28988771	EGFR Ligands Differentially Stabilize Receptor Dimers to Specify Signaling Kinetics.		Pubmed	2.821e-05	1	0.003895	0.04408	3	8	ERBB3,ERBB4,EGF
Pubmed	19924644	Claudins in human cancer: a review.		Pubmed	2.821e-05	1	0.003895	0.04408	3	8	CLDN7,CLDN10,CLDN8
Pubmed	19716087	Genetic variation in angiotensin-converting enzyme-related pathways associated with sudden cardiac arrest risk.		Pubmed	2.821e-05	1	0.003895	0.04408	3	8	KNG1,REN,ACE2
Pubmed	22248045	Meningeal defects alter the tangential migration of cortical interneurons in Foxc1hith/hith mice.		Pubmed	2.821e-05	1	0.003895	0.04408	3	8	GAD1,PVALB,CALB1
Pubmed	17408468	Genetic polymorphisms associated with priapism in sickle cell disease.		Pubmed	2.821e-05	1	0.003895	0.04408	3	8	KL,AQP1,SLC4A1
Pubmed	12424224	NEPH1 defines a novel family of podocin interacting proteins.		Pubmed	2.821e-05	1	0.003895	0.04408	3	8	PDZK1,NPHS2,NPHS1
Pubmed	22662192	IQGAP1 interacts with components of the slit diaphragm complex in podocytes and is involved in podocyte migration and permeability in vitro.		Pubmed	2.821e-05	1	0.003895	0.04408	3	8	NPHS2,NPHS1,PODXL
Pubmed	15369770	Identification of a novel murine organic anion transporter family member, OAT6, expressed in olfactory mucosa.		Pubmed	2.821e-05	1	0.003895	0.04408	3	8	SLC22A6,SLC22A2,SLC22A5
Pubmed	24198279	Cell delamination in the mesencephalic neural fold and its implication for the origin of ectomesenchyme.		Pubmed	2.821e-05	1	0.003895	0.04408	3	8	SOX9,TFAP2A,CDH1
Pubmed	19965931	ERRgamma regulates cardiac, gastric, and renal potassium homeostasis.		Pubmed	2.821e-05	1	0.003895	0.04408	3	8	ESRRG,KCNJ1,KLK1
Pubmed	27631554	Timed Inhibition of Orexin System by Suvorexant Improved Sleep and Glucose Metabolism in Type 2 Diabetic db/db Mice.		Pubmed	2.821e-05	1	0.003895	0.04408	3	8	PPARGC1A,G6PC,PCK1
Pubmed	25993027	Role of Prox1 in the Transforming Ascending Thin Limb of Henle's Loop during Mouse Kidney Development.		Pubmed	2.821e-05	1	0.003895	0.04408	3	8	UMOD,AQP1,SLC12A1
Pubmed	23743675	A meta-analysis of two genome-wide association studies to identify novel loci for maximum number of alcoholic drinks.		Pubmed	2.821e-05	1	0.003895	0.04408	3	8	SLC26A4,ESRRG,PLCL1
Pubmed	24349082	Cartilage-specific overexpression of ERR? results in Chondrodysplasia and reduced chondrocyte proliferation.		Pubmed	3.252e-05	1	0.003895	0.04408	4	23	SOX9,ESRRG,PTH1R,FGFR3
Pubmed	31524221	Circular RNA profile in liver tissue of EpCAM knockout mice.		Pubmed	3.252e-05	1	0.003895	0.04408	4	23	SOX9,HNF1B,SLC2A2,G6PC
Pubmed	29532549	A novel role for cilia-dependent sonic hedgehog signaling during submandibular gland development.		Pubmed	3.252e-05	1	0.003895	0.04408	4	23	SOX9,KRT8,EGF,CDH1
Pubmed	31882545	Loss of the disease-associated glycosyltransferase Galnt3 alters Muc10 glycosylation and the composition of the oral microbiome.		Pubmed	3.252e-05	1	0.003895	0.04408	4	23	GALNT3,GALNT14,GALNT11,MUC1
Pubmed	21305474	Sox17-dependent gene expression and early heart and gut development in Sox17-deficient mouse embryos.		Pubmed	3.252e-05	1	0.003895	0.04408	4	23	FGB,SLC2A2,CRYAB,SLCO4C1
Pubmed	29684311	TFAM is required for maturation of the fetal and adult intestinal epithelium.		Pubmed	3.252e-05	1	0.003895	0.04408	4	23	CUBN,MTTP,CDH1,ENPEP
Pubmed	23852729	Reconstituting pancreas development from purified progenitor cells reveals genes essential for islet differentiation.		Pubmed	3.252e-05	1	0.003895	0.04408	4	23	SOX9,HNF1B,MUC1,CDH1
Pubmed	22766025	E-cadherin is required for intestinal morphogenesis in the mouse.		Pubmed	3.252e-05	1	0.003895	0.04408	4	23	SOX9,FABP1,MUC1,CDH1
Pubmed	20944551	Dicer regulates the development of nephrogenic and ureteric compartments in the mammalian kidney.		Pubmed	3.252e-05	1	0.003895	0.04408	4	23	SLC12A1,SLC12A3,SLC34A1,CDH6
Pubmed	15533830	Using real time RT-PCR analysis to determine multiple gene expression patterns during XX and XY mouse fetal gonad development.		Pubmed	3.449e-05	1	0.003895	0.04408	5	46	SOX9,FGF9,SOSTDC1,REN,EMX2
Pubmed	19578796	Association of genetic variants with chronic kidney disease in individuals with different lipid profiles.		Pubmed	3.503e-05	1	0.003895	0.04408	8	152	EPHX2,SPINK1,PPARGC1A,ACSM3,FGB,LGALS2,LIPC,PCK1
Pubmed	12690205	Human chromosome 7: DNA sequence and biology.		Pubmed	3.581e-05	1	0.003895	0.04408	15	536	TSPAN12,AOC1,CYP3A5,AZGP1,DDC,ABCB1,MAGI2,MET,PODXL,SOSTDC1,AQP1,SLC13A1,GALNT11,OSBPL3,ATP6V0A4
Pubmed	31666704	Hierarchical organization of cortical and thalamic connectivity.		Pubmed	3.877e-05	1	0.003895	0.04408	4	24	ERBB4,PVALB,NPR3,CALB1
Pubmed	22275141	Dynamic distribution of claudin proteins in pancreatic epithelia undergoing morphogenesis or neoplastic transformation.		Pubmed	3.877e-05	1	0.003895	0.04408	4	24	CLDN7,CLDN10,CLDN8,CDH1
Pubmed	21982646	A conserved Pbx-Wnt-p63-Irf6 regulatory module controls face morphogenesis by promoting epithelial apoptosis.		Pubmed	3.877e-05	1	0.003895	0.04408	4	24	IRF6,FGF9,TFAP2A,CDH1
Pubmed	30097533	Discovery of a Human Testis-specific Protein Complex TEX101-DPEP3 and Selection of Its Disrupting Antibodies.		Pubmed	3.881e-05	1	0.003895	0.04408	10	249	ACP3,HMGCS2,CLU,AK4,MME,ANPEP,AOX1,ACE2,ATP1B1,CYB5A
Pubmed	16710414	The DNA sequence and biological annotation of human chromosome 1.		Pubmed	3.911e-05	1	0.003895	0.04408	22	1031	PDZK1,ESRRG,IRF6,DNAJC6,PTGER3,S100A2,DIO1,NPR1,FMO1,FMO4,FMO5,REN,DIRAS3,C1orf115,EFNA1,SLC16A4,PDZK1IP1,AKR7A3,AGMAT,ATP1A1,ATP1B1,HAO2
Pubmed	19037081	Cortical interneurons require p35/Cdk5 for their migration and laminar organization.		Pubmed	4.206e-05	1	0.003895	0.04408	3	9	GAD1,PVALB,CALB1
Pubmed	11171065	Prenatal and postnatal development of peroxisomal lipid-metabolizing pathways in the mouse.		Pubmed	4.206e-05	1	0.003895	0.04408	3	9	ACOX2,PHYH,EHHADH
Pubmed	16226707	Radial glia cells are candidate stem cells of ependymoma.		Pubmed	4.206e-05	1	0.003895	0.04408	3	9	PCP4,PPP1R1A,EMX2
Pubmed	10655590	Defects in pathfinding by cranial neural crest cells in mice lacking the neuregulin receptor ErbB4.		Pubmed	4.206e-05	1	0.003895	0.04408	3	9	ERBB3,ERBB4,TFAP2A
Pubmed	29867141	Potent and specific Atg8-targeting autophagy inhibitory peptides from giant ankyrins.		Pubmed	4.206e-05	1	0.003895	0.04408	3	9	RETREG1,ANK2,ANK3
Pubmed	15229180	Fgf9 induces proliferation and nuclear localization of FGFR2 in Sertoli precursors during male sex determination.		Pubmed	4.206e-05	1	0.003895	0.04408	3	9	SOX9,FGF9,FGFR3
Pubmed	18424435	Regulation of the noradrenaline neurotransmitter phenotype by the transcription factor AP-2beta.		Pubmed	4.206e-05	1	0.003895	0.04408	3	9	GATA3,TFAP2A,TFAP2B
Pubmed	6089206	Human metallothionein genes are clustered on chromosome 16.		Pubmed	4.206e-05	1	0.003895	0.04408	3	9	MT1E,MT1F,MT1G
Pubmed	18083160	Dynamic expression of Lrp2 pathway members reveals progressive epithelial differentiation of primitive endoderm in mouse blastocyst.		Pubmed	4.206e-05	1	0.003895	0.04408	3	9	CUBN,LRP2,CDH1
Pubmed	16807322	Layer acquisition by cortical GABAergic interneurons is independent of Reelin signaling.		Pubmed	4.206e-05	1	0.003895	0.04408	3	9	GAD1,PVALB,CALB1
Pubmed	16504022	FGF9 can induce endochondral ossification in cranial mesenchyme.		Pubmed	4.206e-05	1	0.003895	0.04408	3	9	SOX9,FGF9,FGFR3
Pubmed	12467588	Gamma protocadherins are required for survival of spinal interneurons.		Pubmed	4.586e-05	1	0.003895	0.04408	4	25	GAD1,PVALB,CALB1,LHX1
Pubmed	17683524	A systematic screen for genes expressed in definitive endoderm by Serial Analysis of Gene Expression (SAGE).		Pubmed	4.586e-05	1	0.003895	0.04408	4	25	SPINK1,CUBN,LGALS2,CCDC198
Pubmed	23554936	Visceral endoderm expression of Yin-Yang1 (YY1) is required for VEGFA maintenance and yolk sac development.		Pubmed	4.586e-05	1	0.003895	0.04408	4	25	PPARGC1A,HNF1B,LRP2,CDH1
Pubmed	19544582	Fibroblast growth factor (FGF) gene expression in the developing cerebellum suggests multiple roles for FGF signaling during cerebellar morphogenesis and development.		Pubmed	4.586e-05	1	0.003895	0.04408	4	25	FGF1,FGF9,FGFR3,LHX1
Pubmed	23720494	Genome-wide association study identifies loci affecting blood copper, selenium and zinc.		Pubmed	4.704e-05	1	0.003895	0.04408	5	49	BHMT,BHMT2,CA2,ANK2,SELENBP1
Pubmed	25446530	Hepatic Notch2 deficiency leads to bile duct agenesis perinatally and secondary bile duct formation after weaning.		Pubmed	5.386e-05	1	0.003895	0.04408	4	26	SOX9,NR1H4,GOT1,HNF1B
Pubmed	31073041	Temporal patterning of apical progenitors and their daughter neurons in the developing neocortex.		Pubmed	5.479e-05	1	0.003895	0.04408	6	82	CHL1,SOX9,CLU,FGFR3,ANK3,EMX2
Pubmed	18618131	Use of dual section mRNA in situ hybridisation/immunohistochemistry to clarify gene expression patterns during the early stages of nephron development in the embryo and in the mature nephron of the adult mouse kidney.		Pubmed	5.972e-05	1	0.003895	0.04408	3	10	UMOD,CALB1,AQP1
Pubmed	17192421	Involvement of the myelin-associated inhibitor Nogo-A in early cortical development and neuronal maturation.		Pubmed	5.972e-05	1	0.003895	0.04408	3	10	GAD1,PVALB,CALB1
Pubmed	31160421	Comprehensive single cell mRNA profiling reveals a detailed roadmap for pancreatic endocrinogenesis.		Pubmed	5.972e-05	1	0.003895	0.04408	3	10	SOX9,MUC1,CDH1
Pubmed	28746879	Daple Coordinates Planar Polarized Microtubule Dynamics in Ependymal Cells and Contributes to Hydrocephalus.		Pubmed	5.972e-05	1	0.003895	0.04408	3	10	ATP1A1,ATP1B1,CDH1
Pubmed	19748502	Sox10 promotes the survival of cochlear progenitors during the establishment of the organ of Corti.		Pubmed	5.972e-05	1	0.003895	0.04408	3	10	SOX9,ERBB3,PVALB
Pubmed	16216236	Lim 1 is required for nephric duct extension and ureteric bud morphogenesis.		Pubmed	5.972e-05	1	0.003895	0.04408	3	10	GATA3,LHX1,CDH1
Pubmed	30718617	Reconstitution of the embryonic kidney identifies a donor cell contribution to the renal vasculature upon transplantation.		Pubmed	5.972e-05	1	0.003895	0.04408	3	10	NPHS1,KRT8,CDH1
Pubmed	19298847	In situ hybridization reveals developmental regulation of ErbB1-4 mRNA expression in mouse midbrain: implication of ErbB receptors for dopaminergic neurons.		Pubmed	5.972e-05	1	0.003895	0.04408	3	10	ERBB3,ERBB4,PVALB
Pubmed	8702723	The epidermal growth factor receptor couples transforming growth factor-alpha, heparin-binding epidermal growth factor-like factor, and amphiregulin to Neu, ErbB-3, and ErbB-4.		Pubmed	5.972e-05	1	0.003895	0.04408	3	10	ERBB3,ERBB4,EGF
Pubmed	11585919	claudin-18, a novel downstream target gene for the T/EBP/NKX2.1 homeodomain transcription factor, encodes lung- and stomach-specific isoforms through alternative splicing.		Pubmed	5.972e-05	1	0.003895	0.04408	3	10	CLDN7,CLDN10,CLDN8
Pubmed	21289056	Role of smooth muscle protein SM22? in glomerular epithelial cell injury.		Pubmed	5.972e-05	1	0.003895	0.04408	3	10	NPHS2,NPHS1,CDH1
Pubmed	11923212	Permeability barrier dysfunction in transgenic mice overexpressing claudin 6.		Pubmed	5.972e-05	1	0.003895	0.04408	3	10	CLDN7,CLDN10,CLDN8
Pubmed	25467980	NPAS1 represses the generation of specific subtypes of cortical interneurons.		Pubmed	6.283e-05	1	0.003895	0.04408	4	27	GAD1,ERBB4,PVALB,FGFR3
Pubmed	20173083	Genetic variation in metabolizing enzyme and transporter genes: comprehensive assessment in 3 major East Asian subpopulations with comparison to Caucasians and Africans.		Pubmed	6.283e-05	1	0.003895	0.04408	4	27	CYP3A5,ABCB1,SLC15A2,SLC22A2
Pubmed	21103348	Failure of fluid absorption in the endolymphatic sac initiates cochlear enlargement that leads to deafness in mice lacking pendrin expression.		Pubmed	6.532e-05	1	0.003895	0.04408	2	2	SLC26A4,ATP1A1
Pubmed	12411514	Regulation of the sodium bicarbonate cotransporter kNBC1 function: role of Asp(986), Asp(988) and kNBC1-carbonic anhydrase II binding.		Pubmed	6.532e-05	1	0.003895	0.04408	2	2	CA2,SLC4A4
Pubmed	25590378	The functional implications of common genetic variation in CYP3A5 and ABCB1 in human proximal tubule cells.		Pubmed	6.532e-05	1	0.003895	0.04408	2	2	CYP3A5,ABCB1
Pubmed	18799195	Claudin-7 and claudin-8: immunohistochemical markers for the differential diagnosis of chromophobe renal cell carcinoma and renal oncocytoma.		Pubmed	6.532e-05	1	0.003895	0.04408	2	2	CLDN7,CLDN8
Pubmed	12604689	Selective tryptic cleavage at the tethered ligand site of the amino terminal domain of proteinase-activated receptor-2 in intact cells.		Pubmed	6.532e-05	1	0.003895	0.04408	2	2	F2RL1,PLG
Pubmed	19657584	Negative emotionality: monoamine oxidase B gene variants modulate personality traits in healthy humans.		Pubmed	6.532e-05	1	0.003895	0.04408	2	2	MAOA,MAOB
Pubmed	11063570	Localization of the Cl-/HCO3- anion exchanger binding site to the amino-terminal region of carbonic anhydrase II.		Pubmed	6.532e-05	1	0.003895	0.04408	2	2	CA2,SLC4A1
Pubmed	28596233	Adaptable interaction between aquaporin-1 and band 3 reveals a potential role of water channel in blood CO2 transport.		Pubmed	6.532e-05	1	0.003895	0.04408	2	2	AQP1,SLC4A1
Pubmed	23858446	Cognitive abnormalities and hippocampal alterations in monoamine oxidase A and B knockout mice.		Pubmed	6.532e-05	1	0.003895	0.04408	2	2	MAOA,MAOB
Pubmed	21075085	Up-regulation of the isoenzymes MAO-A and MAO-B in the human basal ganglia and pons in Huntington's disease revealed by quantitative enzyme radioautography.		Pubmed	6.532e-05	1	0.003895	0.04408	2	2	MAOA,MAOB
Pubmed	12761213	Human kininogen gene is transactivated by the farnesoid X receptor.		Pubmed	6.532e-05	1	0.003895	0.04408	2	2	KNG1,NR1H4
Pubmed	17114345	MUC1 oncoprotein functions in activation of fibroblast growth factor receptor signaling.		Pubmed	6.532e-05	1	0.003895	0.04408	2	2	FGFR3,MUC1
Pubmed	26421491	Effects of CYP3A4/5 and ABCB1 genetic polymorphisms on carbamazepine metabolism and transport in Chinese patients with epilepsy treated with carbamazepine in monotherapy and bitherapy.		Pubmed	6.532e-05	1	0.003895	0.04408	2	2	CYP3A5,ABCB1
Pubmed	18836445	Disruption of an AP-2alpha binding site in an IRF6 enhancer is associated with cleft lip.		Pubmed	6.532e-05	1	0.003895	0.04408	2	2	IRF6,TFAP2A
Pubmed	12388426	Localization of pendrin in mouse kidney.		Pubmed	6.532e-05	1	0.003895	0.04408	2	2	SLC26A4,SLC12A3
Pubmed	7573462	In situ localization of sodium-potassium ATPase mRNA in developing mouse lung epithelium.		Pubmed	6.532e-05	1	0.003895	0.04408	2	2	ATP1A1,ATP1B1
Pubmed	21359973	Transcriptional regulation and multiple functions of MAO genes.		Pubmed	6.532e-05	1	0.003895	0.04408	2	2	MAOA,MAOB
Pubmed	17356845	3-Hydroxyglutaric acid is transported via the sodium-dependent dicarboxylate transporter NaDC3.		Pubmed	6.532e-05	1	0.003895	0.04408	2	2	SLC13A3,SLC22A2
Pubmed	23978537	Expression and immunolocalisation of the endocytic receptors megalin and cubilin in the human yolk sac and placenta across gestation.		Pubmed	6.532e-05	1	0.003895	0.04408	2	2	CUBN,LRP2
Pubmed	7987396	Identification of mutations in the alpha 3(IV) and alpha 4(IV) collagen genes in autosomal recessive Alport syndrome.		Pubmed	6.532e-05	1	0.003895	0.04408	2	2	COL4A3,COL4A4
Pubmed	26183901	Distinction in the immunoreactivities of two calcium-binding proteins and neuronal birthdates in the first and higher-order somatosensory thalamic nuclei of mice: Evolutionary implications.		Pubmed	6.532e-05	1	0.003895	0.04408	2	2	PVALB,CALB1
Pubmed	21644212	Lack of association of variants of the renal salt reabsorption-related genes SLC12A3 and ClC-Kb and hypertension in Mongolian and Han populations in Inner Mongolia.		Pubmed	6.532e-05	1	0.003895	0.04408	2	2	CLCNKB,SLC12A3
Pubmed	11053642	In vivo gene expression profile analysis of metallothionein in renal cell carcinoma.		Pubmed	6.532e-05	1	0.003895	0.04408	2	2	MT1E,MT1H
Pubmed	28332126	Klotho suppresses high phosphate-induced osteogenic responses in human aortic valve interstitial cells through inhibition of Sox9.		Pubmed	6.532e-05	1	0.003895	0.04408	2	2	SOX9,KL
Pubmed	10741426	Specific expression of the LIM/homeodomain protein Lim-1 in horizontal cells during retinogenesis.		Pubmed	6.532e-05	1	0.003895	0.04408	2	2	CALB1,LHX1
Pubmed	25929810	The prognostic impact of lipid biosynthesis-associated markers, HSD17B2 and HMGCS2, in rectal cancer treated with neoadjuvant concurrent chemoradiotherapy.		Pubmed	6.532e-05	1	0.003895	0.04408	2	2	HMGCS2,HSD17B2
Pubmed	29478894	Heterogeneity of SOX9 and HNF1? in Pancreatic Ducts Is Dynamic.		Pubmed	6.532e-05	1	0.003895	0.04408	2	2	SOX9,HNF1B
Pubmed	15635077	New insights into cystinuria: 40 new mutations, genotype-phenotype correlation, and digenic inheritance causing partial phenotype.		Pubmed	6.532e-05	1	0.003895	0.04408	2	2	SLC3A1,SLC7A9
Pubmed	16525162	Urea and urine concentrating ability in mice lacking AQP1 and AQP3.		Pubmed	6.532e-05	1	0.003895	0.04408	2	2	AQP1,AQP3
Pubmed	20357698	Genetic variations in ABCB1 and CYP3A5 as well as sex influence quinine disposition among Ugandans.		Pubmed	6.532e-05	1	0.003895	0.04408	2	2	CYP3A5,ABCB1
Pubmed	11861643	Analysis of conserved active site residues in monoamine oxidase A and B and their three-dimensional molecular modeling.		Pubmed	6.532e-05	1	0.003895	0.04408	2	2	MAOA,MAOB
Pubmed	23364483	CYP3A and ABCB1 genetic polymorphisms on the pharmacokinetics and pharmacodynamics of tacrolimus and its metabolites (M-I and M-III).		Pubmed	6.532e-05	1	0.003895	0.04408	2	2	CYP3A5,ABCB1
Pubmed	16358225	Co-localization and interaction of b0,+-type amino acid transporter 1 (BAT1) with caveolin-1 in rat kidney.		Pubmed	6.532e-05	1	0.003895	0.04408	2	2	SLC3A1,SLC7A9
Pubmed	15167702	The effect of CYP3A5 and MDR1 (ABCB1) polymorphisms on cyclosporine and tacrolimus dose requirements and trough blood levels in stable renal transplant patients.		Pubmed	6.532e-05	1	0.003895	0.04408	2	2	CYP3A5,ABCB1
Pubmed	14722018	Expression of claudin-7 and -8 along the mouse nephron.		Pubmed	6.532e-05	1	0.003895	0.04408	2	2	CLDN7,CLDN8
Pubmed	3931905	Enzymes of uracil catabolism in normal and neoplastic human tissues.		Pubmed	6.532e-05	1	0.003895	0.04408	2	2	UPB1,DPYS
Pubmed	15116055	CYP3A5 and MDR1 genetic polymorphisms and cyclosporine pharmacokinetics after renal transplantation.		Pubmed	6.532e-05	1	0.003895	0.04408	2	2	CYP3A5,ABCB1
Pubmed	22437417	Acute endotoxemia in mice induces downregulation of megalin and cubilin in the kidney.		Pubmed	6.532e-05	1	0.003895	0.04408	2	2	CUBN,LRP2
Pubmed	17804715	Glutathione peroxidase 3, deleted or methylated in prostate cancer, suppresses prostate cancer growth and metastasis.		Pubmed	6.532e-05	1	0.003895	0.04408	2	2	MET,GPX3
Pubmed	17804733	Kallikrein 6 induces E-cadherin shedding and promotes cell proliferation, migration, and invasion.		Pubmed	6.532e-05	1	0.003895	0.04408	2	2	KLK1,CDH1
Pubmed	15226679	CYP3A5*1-carrying graft liver reduces the concentration/oral dose ratio of tacrolimus in recipients of living-donor liver transplantation.		Pubmed	6.532e-05	1	0.003895	0.04408	2	2	CYP3A5,ABCB1
Pubmed	22850464	Monoamine oxidase A and A/B knockout mice display autistic-like features.		Pubmed	6.532e-05	1	0.003895	0.04408	2	2	MAOA,MAOB
Pubmed	17427196	Monoamine oxidase A gene polymorphism predicts adolescent outcome of attention-deficit/hyperactivity disorder.		Pubmed	6.532e-05	1	0.003895	0.04408	2	2	MAOA,MAOB
Pubmed	9428707	High-molecular-mass and low-molecular-mass kininogens block plasmin-induced platelet aggregation by forming a complex with kringle 5 of plasminogen/plasmin.		Pubmed	6.532e-05	1	0.003895	0.04408	2	2	PLG,KNG1
Pubmed	18092818	Comparison of the structural properties of the active site cavities of human and rat monoamine oxidase A and B in their soluble and membrane-bound forms.		Pubmed	6.532e-05	1	0.003895	0.04408	2	2	MAOA,MAOB
Pubmed	20589923	Association study between antipsychotic-induced restless legs syndrome and polymorphisms of monoamine oxidase genes in schizophrenia.		Pubmed	6.532e-05	1	0.003895	0.04408	2	2	MAOA,MAOB
Pubmed	24474819	Hepatic Mttp deletion reverses gallstone susceptibility in L-Fabp knockout mice.		Pubmed	6.532e-05	1	0.003895	0.04408	2	2	FABP1,MTTP
Pubmed	26856709	Impact of CYP3A5 and MDR-1 gene polymorphisms on the dose and level of tacrolimus among living-donor liver transplanted patients: single center experience.		Pubmed	6.532e-05	1	0.003895	0.04408	2	2	CYP3A5,ABCB1
Pubmed	20418498	Dietary and genetic evidence for phosphate toxicity accelerating mammalian aging.		Pubmed	6.532e-05	1	0.003895	0.04408	2	2	KL,SLC34A1
Pubmed	23339695	CD10 and E-cad expression in urinary bladder urothelial and squamous cell carcinoma.		Pubmed	6.532e-05	1	0.003895	0.04408	2	2	MME,CDH1
Pubmed	12716955	Calbindin in cerebellar Purkinje cells is a critical determinant of the precision of motor coordination.		Pubmed	6.532e-05	1	0.003895	0.04408	2	2	PVALB,CALB1
Pubmed	21130072	HNF-1B specifically regulates the transcription of the ?a-subunit of the Na+/K+-ATPase.		Pubmed	6.532e-05	1	0.003895	0.04408	2	2	HNF1B,FXYD2
Pubmed	29991328	CYP3A5 and ABCB1 polymorphisms in living donors do not impact clinical outcome after kidney transplantation.		Pubmed	6.532e-05	1	0.003895	0.04408	2	2	CYP3A5,ABCB1
Pubmed	21697081	Monoamine oxidase a expression is vital for embryonic brain development by modulating developmental apoptosis.		Pubmed	6.532e-05	1	0.003895	0.04408	2	2	MAOA,MAOB
Pubmed	27966362	Ion Pathways in the Na(+)/K(+)-ATPase.		Pubmed	6.532e-05	1	0.003895	0.04408	2	2	ATP1A1,ATP1B1
Pubmed	19481955	The upgraded role of HER3 and HER4 receptors in breast cancer.		Pubmed	6.532e-05	1	0.003895	0.04408	2	2	ERBB3,ERBB4
Pubmed	25339750	PGC-1? provides a transcriptional framework for synchronous neurotransmitter release from parvalbumin-positive interneurons.		Pubmed	6.532e-05	1	0.003895	0.04408	2	2	PPARGC1A,PVALB
Pubmed	25229338	Rare hereditary COL4A3/COL4A4 variants may be mistaken for familial focal segmental glomerulosclerosis.		Pubmed	6.532e-05	1	0.003895	0.04408	2	2	COL4A3,COL4A4
Pubmed	9461128	Identification and partial characterization of PDZK1: a novel protein containing PDZ interaction domains.		Pubmed	6.532e-05	1	0.003895	0.04408	2	2	PDZK1,PDZK1IP1
Pubmed	19782624	Large rearrangements detected by MLPA, point mutations, and survey of the frequency of mutations within the SLC3A1 and SLC7A9 genes in a cohort of 172 cystinuric Italian patients.		Pubmed	6.532e-05	1	0.003895	0.04408	2	2	SLC3A1,SLC7A9
Pubmed	11834493	Increased baroreceptor response in mice deficient in monoamine oxidase A and B.		Pubmed	6.532e-05	1	0.003895	0.04408	2	2	MAOA,MAOB
Pubmed	9367891	EGF inhibits expression of WDNM1 and sulfated glycoprotein-2 genes in mammary epithelial cells.		Pubmed	6.532e-05	1	0.003895	0.04408	2	2	CLU,EGF
Pubmed	19865785	FXYD2 and Na,K-ATPase expression in isolated human proximal tubular cells: disturbed upregulation on renal hypomagnesemia?		Pubmed	6.532e-05	1	0.003895	0.04408	2	2	ATP1A1,FXYD2
Pubmed	22565185	A spectrum of novel NPHS1 and NPHS2 gene mutations in pediatric nephrotic syndrome patients from Pakistan.		Pubmed	6.532e-05	1	0.003895	0.04408	2	2	NPHS2,NPHS1
Pubmed	9546356	Tubular up-regulation of clusterin mRNA in murine lupus-like nephritis.		Pubmed	6.532e-05	1	0.003895	0.04408	2	2	CLU,LRP2
Pubmed	3387449	cDNA cloning of human liver monoamine oxidase A and B: molecular basis of differences in enzymatic properties.		Pubmed	6.532e-05	1	0.003895	0.04408	2	2	MAOA,MAOB
Pubmed	18936931	Effect of genetic polymorphisms of CYP3A5 and MDR1 on cyclosporine concentration during the early stage after renal transplantation in Chinese patients co-treated with diltiazem.		Pubmed	6.532e-05	1	0.003895	0.04408	2	2	CYP3A5,ABCB1
Pubmed	8316221	Site-directed mutagenesis of monoamine oxidase A and B: role of cysteines.		Pubmed	6.532e-05	1	0.003895	0.04408	2	2	MAOA,MAOB
Pubmed	25014506	Genetic variance in ABCB1 and CYP3A5 does not contribute toward the development of chronic kidney disease after liver transplantation.		Pubmed	6.532e-05	1	0.003895	0.04408	2	2	CYP3A5,ABCB1
Pubmed	24337247	Nephrin and Podocin functions are highly conserved between the zebrafish pronephros and mammalian metanephros.		Pubmed	6.532e-05	1	0.003895	0.04408	2	2	NPHS2,NPHS1
Pubmed	26051160	Association between monoamine oxidase gene polymorphisms and smoking behavior: A meta-analysis.		Pubmed	6.532e-05	1	0.003895	0.04408	2	2	MAOA,MAOB
Pubmed	26254096	Prognostic significance of serum ERBB3 and ERBB4 mRNA in lung adenocarcinoma patients.		Pubmed	6.532e-05	1	0.003895	0.04408	2	2	ERBB3,ERBB4
Pubmed	28736028	Association Between Tacrolimus Pharmacokinetics and Cytochrome P450 3A5 and Multidrug Resistance Protein 1 Exon 21 Polymorphisms.		Pubmed	6.532e-05	1	0.003895	0.04408	2	2	CYP3A5,ABCB1
Pubmed	1432104	Promoter organization and activity of human monoamine oxidase (MAO) A and B genes.		Pubmed	6.532e-05	1	0.003895	0.04408	2	2	MAOA,MAOB
Pubmed	30982971	Tspan8 is expressed in breast cancer and regulates E-cadherin/catenin signalling and metastasis accompanied by increased circulating extracellular vesicles.		Pubmed	6.532e-05	1	0.003895	0.04408	2	2	TSPAN8,CDH1
Pubmed	12234283	Cystinuria in children: distribution and frequencies of mutations in the SLC3A1 and SLC7A9 genes.		Pubmed	6.532e-05	1	0.003895	0.04408	2	2	SLC3A1,SLC7A9
Pubmed	19373777	Increased APN/CD13 and acid aminopeptidase activities in head and neck squamous cell carcinoma.		Pubmed	6.532e-05	1	0.003895	0.04408	2	2	ANPEP,ENPEP
Pubmed	10799513	Differential influence of the 4F2 heavy chain and the protein related to b(0,+) amino acid transport on substrate affinity of the heteromeric b(0,+) amino acid transporter.		Pubmed	6.532e-05	1	0.003895	0.04408	2	2	SLC3A1,SLC7A9
Pubmed	25964309	Clinical and genetic analysis of patients with cystinuria in the United Kingdom.		Pubmed	6.532e-05	1	0.003895	0.04408	2	2	SLC3A1,SLC7A9
Pubmed	19289993	The effect of CYP3A5 and ABCB1 single nucleotide polymorphisms on tacrolimus dose requirements in Caucasian liver transplant patients.		Pubmed	6.532e-05	1	0.003895	0.04408	2	2	CYP3A5,ABCB1
Pubmed	9750160	Ontogeny of the murine glucose-6-phosphatase system.		Pubmed	6.532e-05	1	0.003895	0.04408	2	2	G6PC,PCK1
Pubmed	28330783	Influence of MDR1 and CYP3A5 genetic polymorphisms on trough levels and therapeutic response of imatinib in newly diagnosed patients with chronic myeloid leukemia.		Pubmed	6.532e-05	1	0.003895	0.04408	2	2	CYP3A5,ABCB1
Pubmed	25521359	Donor ABCB1 genetic polymorphisms influence epithelial-to-mesenchyme transition in tacrolimus-treated kidney recipients.		Pubmed	6.532e-05	1	0.003895	0.04408	2	2	CYP3A5,ABCB1
Pubmed	21538271	[Significance of aquaporin-1 and aquaporin-3 expression in colorectal carcinoma].		Pubmed	6.532e-05	1	0.003895	0.04408	2	2	AQP1,AQP3
Pubmed	15694196	Monoamine oxidases A and B gene polymorphisms in migraine patients.		Pubmed	6.532e-05	1	0.003895	0.04408	2	2	MAOA,MAOB
Pubmed	17848580	NKCC2 surface expression in mammalian cells: down-regulation by novel interaction with aldolase B.		Pubmed	6.532e-05	1	0.003895	0.04408	2	2	ALDOB,SLC12A1
Pubmed	12777388	Structural comparison of human monoamine oxidases A and B: mass spectrometry monitoring of cysteine reactivities.		Pubmed	6.532e-05	1	0.003895	0.04408	2	2	MAOA,MAOB
Pubmed	31003147	Recipient ABCB1, donor and recipient CYP3A5 genotypes influence tacrolimus pharmacokinetics in liver transplant cases.		Pubmed	6.532e-05	1	0.003895	0.04408	2	2	CYP3A5,ABCB1
Pubmed	9774471	Carbonic anhydrase II binds to the carboxyl terminus of human band 3, the erythrocyte C1-/HCO3- exchanger.		Pubmed	6.532e-05	1	0.003895	0.04408	2	2	CA2,SLC4A1
Pubmed	14991253	The population-specific distribution and frequencies of genomic variants in the SLC3A1 and SLC7A9 genes and their application in molecular genetic testing of cystinuria.		Pubmed	6.532e-05	1	0.003895	0.04408	2	2	SLC3A1,SLC7A9
Pubmed	7536695	Characterization and quantification of full-length and truncated Na,K-ATPase alpha 1 and beta 1 RNA transcripts expressed in human retinal pigment epithelium.		Pubmed	6.532e-05	1	0.003895	0.04408	2	2	ATP1A1,ATP1B1
Pubmed	25354943	Transporters involved in renal excretion of N-carbamoylglutamate, an orphan drug to treat inborn n-acetylglutamate synthase deficiency.		Pubmed	6.532e-05	1	0.003895	0.04408	2	2	SLC22A6,SLC13A3
Pubmed	28812535	Associating mutations causing cystinuria with disease severity with the aim of providing precision medicine.		Pubmed	6.532e-05	1	0.003895	0.04408	2	2	SLC3A1,SLC7A9
Pubmed	11761322	Substrates but not inhibitors alter the redox potentials of monoamine oxidases.		Pubmed	6.532e-05	1	0.003895	0.04408	2	2	MAOA,MAOB
Pubmed	19670078	Analysis of a non-synonymous single nucleotide polymorphism of the human diamine oxidase gene (ref. SNP ID: rs1049793) in patients with Crohn's disease.		Pubmed	6.532e-05	1	0.003895	0.04408	2	2	AOC1,DAO
Pubmed	16476579	Impaired pain sensation in mice lacking Aquaporin-1 water channels.		Pubmed	6.532e-05	1	0.003895	0.04408	2	2	AQP1,AQP3
Pubmed	15814280	The impact of pharmacogenomic factors on acute persistent rejection in adult lung transplant patients.		Pubmed	6.532e-05	1	0.003895	0.04408	2	2	CYP3A5,ABCB1
Pubmed	23193156	MUC1 drives c-Met-dependent migration and scattering.		Pubmed	6.532e-05	1	0.003895	0.04408	2	2	MET,MUC1
Pubmed	21839244	Pharmacogenetic study of ABCB1 and CYP3A5 genes during the first year following heart transplantation regarding tacrolimus or cyclosporine levels.		Pubmed	6.532e-05	1	0.003895	0.04408	2	2	CYP3A5,ABCB1
Pubmed	17275105	Differences in locomotor behavior revealed in mice deficient for the calcium-binding proteins parvalbumin, calbindin D-28k or both.		Pubmed	6.532e-05	1	0.003895	0.04408	2	2	PVALB,CALB1
Pubmed	12136060	Evidence for a genetic association between monoamine oxidase A and restless legs syndrome.		Pubmed	6.532e-05	1	0.003895	0.04408	2	2	MAOA,MAOB
Pubmed	22962849	Cooperative interaction of MUC1 with the HGF/c-Met pathway during hepatocarcinogenesis.		Pubmed	6.532e-05	1	0.003895	0.04408	2	2	MET,MUC1
Pubmed	15755730	Na,K-ATPase from mice lacking the gamma subunit (FXYD2) exhibits altered Na+ affinity and decreased thermal stability.		Pubmed	6.532e-05	1	0.003895	0.04408	2	2	ATP1A1,FXYD2
Pubmed	30610956	Nox4 and soluble epoxide hydrolase synergistically mediate homocysteine-induced inflammation in vascular smooth muscle cells.		Pubmed	6.532e-05	1	0.003895	0.04408	2	2	EPHX2,NOX4
Pubmed	12028435	COL4A3/COL4A4 mutations: from familial hematuria to autosomal-dominant or recessive Alport syndrome.		Pubmed	6.532e-05	1	0.003895	0.04408	2	2	COL4A3,COL4A4
Pubmed	11295131	[Polymorphism of MAO-B gene and NAD(P)H: quinone oxidoreductase gene in Parkinson's disease].		Pubmed	6.532e-05	1	0.003895	0.04408	2	2	MAOB,CRYZ
Pubmed	30906861	Newly developed reversible MAO-B inhibitor circumvents the shortcomings of irreversible inhibitors in Alzheimer's disease.		Pubmed	6.532e-05	1	0.003895	0.04408	2	2	MAOB,DAO
Pubmed	21237140	Simultaneous detection of CYP3A5 and MDR1 polymorphisms based on the SNaPshot assay.		Pubmed	6.532e-05	1	0.003895	0.04408	2	2	CYP3A5,ABCB1
Pubmed	16584389	Multidrug resistance 1 genotype and disposition of budesonide in early primary biliary cirrhosis.		Pubmed	6.532e-05	1	0.003895	0.04408	2	2	CYP3A5,ABCB1
Pubmed	21683068	Single-nucleotide polymorphisms (SNPs) of the IRF6 and TFAP2A in non-syndromic cleft lip with or without cleft palate (NSCLP) in a northern Chinese population.		Pubmed	6.532e-05	1	0.003895	0.04408	2	2	IRF6,TFAP2A
Pubmed	11043382	Molecular cloning and expression of a novel klotho-related protein.		Pubmed	6.532e-05	1	0.003895	0.04408	2	2	KL,GBA3
Pubmed	16403482	Clinical significance of MUC1 and c-Met RT-PCR detection of circulating tumor cells in patients with gastric carcinoma.		Pubmed	6.532e-05	1	0.003895	0.04408	2	2	MET,MUC1
Pubmed	15616221	Expression and role of cubilin in the internalization of nutrients during the peri-implantation development of the rodent embryo.		Pubmed	6.532e-05	1	0.003895	0.04408	2	2	CUBN,LRP2
Pubmed	29050386	Brain monoamine oxidase B and A in human parkinsonian dopamine deficiency disorders.		Pubmed	6.532e-05	1	0.003895	0.04408	2	2	MAOA,MAOB
Pubmed	23974882	Increased Expression of Aquaporin-1 and Aquaporin-3 in Pterygium.		Pubmed	6.532e-05	1	0.003895	0.04408	2	2	AQP1,AQP3
Pubmed	9882736	Expression of a functional Kir4 family inward rectifier K+ channel from a gene cloned from mouse liver.		Pubmed	6.532e-05	1	0.003895	0.04408	2	2	KCNJ15,KCNJ16
Pubmed	10903893	Identification and biochemical localization of a Na-K-Cl cotransporter in the human placental cell line BeWo.		Pubmed	6.532e-05	1	0.003895	0.04408	2	2	SLC12A1,ATP1A1
Pubmed	19349416	Regulation of renal outer medullary potassium channel and renal K(+) excretion by Klotho.		Pubmed	6.532e-05	1	0.003895	0.04408	2	2	KL,KCNJ1
Pubmed	18182100	Cytogenetic analysis of HER1/EGFR, HER2, HER3 and HER4 in 278 breast cancer patients.		Pubmed	6.532e-05	1	0.003895	0.04408	2	2	ERBB3,ERBB4
Pubmed	7969716	Differential age-related changes of MAO-A and MAO-B in mouse brain and peripheral organs.		Pubmed	6.532e-05	1	0.003895	0.04408	2	2	MAOA,MAOB
Pubmed	14697881	The FAD binding sites of human monoamine oxidases A and B.		Pubmed	6.532e-05	1	0.003895	0.04408	2	2	MAOA,MAOB
Pubmed	23671160	Paired-pulse facilitation at recurrent Purkinje neuron synapses is independent of calbindin and parvalbumin during high-frequency activation.		Pubmed	6.532e-05	1	0.003895	0.04408	2	2	PVALB,CALB1
Pubmed	16860487	Deficiency in parvalbumin, but not in calbindin D-28k upregulates mitochondrial volume and decreases smooth endoplasmic reticulum surface selectively in a peripheral, subplasmalemmal region in the soma of Purkinje cells.		Pubmed	6.532e-05	1	0.003895	0.04408	2	2	PVALB,CALB1
Pubmed	17885758	Which genotype of MAO gene that the patients have are likely to be most susceptible to the symptoms of fibromyalgia?		Pubmed	6.532e-05	1	0.003895	0.04408	2	2	MAOA,MAOB
Pubmed	28012250	The effect of Ureaplasma urealyticum on the level of P34H expression, the activity of hyaluronidase, and DNA fragmentation in human spermatozoa.		Pubmed	6.532e-05	1	0.003895	0.04408	2	2	HYAL1,DCXR
Pubmed	23984379	CYP3A5*3 and C3435T MDR1 polymorphisms in prognostication of drug-resistant epilepsy in children and adolescents.		Pubmed	6.532e-05	1	0.003895	0.04408	2	2	CYP3A5,ABCB1
Pubmed	17372036	CYP3A5 and ABCB1 genes influence blood pressure and response to treatment, and their effect is modified by salt.		Pubmed	6.532e-05	1	0.003895	0.04408	2	2	CYP3A5,ABCB1
Pubmed	21978760	Association study of monoamine oxidase A/B genes and schizophrenia in Han Chinese.		Pubmed	6.532e-05	1	0.003895	0.04408	2	2	MAOA,MAOB
Pubmed	28577058	Type B and A monoamine oxidase and their inhibitors regulate the gene expression of Bcl-2 and neurotrophic factors in human glioblastoma U118MG cells: different signal pathways for neuroprotection by selegiline and rasagiline.		Pubmed	6.532e-05	1	0.003895	0.04408	2	2	MAOA,MAOB
Pubmed	27536774	HER3, but Not HER4, Plays an Essential Role in the Clinicopathology and Prognosis of Gastric Cancer: A Meta-Analysis.		Pubmed	6.532e-05	1	0.003895	0.04408	2	2	ERBB3,ERBB4
Pubmed	27426203	Influence of CYP3A5*3 and ABCB1 C3435T on clinical outcomes and trough plasma concentrations of imatinib in Nigerians with chronic myeloid leukaemia.		Pubmed	6.532e-05	1	0.003895	0.04408	2	2	CYP3A5,ABCB1
Pubmed	12813159	Mutational analysis of dendritic Ca2+ kinetics in rodent Purkinje cells: role of parvalbumin and calbindin D28k.		Pubmed	6.532e-05	1	0.003895	0.04408	2	2	PVALB,CALB1
Pubmed	26067610	Urinary ACE2 is associated with urinary L-FABP and albuminuria in patients with chronic kidney disease.		Pubmed	6.532e-05	1	0.003895	0.04408	2	2	FABP1,ACE2
Pubmed	12754212	Identification of small PDZK1-associated protein, DD96/MAP17, as a regulator of PDZK1 and plasma high density lipoprotein levels.		Pubmed	6.532e-05	1	0.003895	0.04408	2	2	PDZK1,PDZK1IP1
Pubmed	9831543	Differential expression of human metallothionein isoform I mRNA in human proximal tubule cells exposed to metals.		Pubmed	6.532e-05	1	0.003895	0.04408	2	2	MT1F,MT1X
Pubmed	23673647	Clusterin and LRP2 are critical components of the hypothalamic feeding regulatory pathway.		Pubmed	6.532e-05	1	0.003895	0.04408	2	2	CLU,LRP2
Pubmed	24045899	Synergistic mutations in SLC3A1 and SLC7A9 leading to heterogeneous cystinuria phenotypes: pitfalls in the diagnostic workup.		Pubmed	6.532e-05	1	0.003895	0.04408	2	2	SLC3A1,SLC7A9
Pubmed	19614771	Immunophenotypic features of MELF pattern invasion in endometrial adenocarcinoma: evidence for epithelial-mesenchymal transition.		Pubmed	6.532e-05	1	0.003895	0.04408	2	2	KRT7,CDH1
Pubmed	28185955	Endothelial Nox4-based NADPH oxidase regulates atherosclerosis via soluble epoxide hydrolase.		Pubmed	6.532e-05	1	0.003895	0.04408	2	2	EPHX2,NOX4
Pubmed	2023912	Human monoamine oxidase A and B genes exhibit identical exon-intron organization.		Pubmed	6.532e-05	1	0.003895	0.04408	2	2	MAOA,MAOB
Pubmed	24275833	GAD67 deficiency in parvalbumin interneurons produces deficits in inhibitory transmission and network disinhibition in mouse prefrontal cortex.		Pubmed	6.532e-05	1	0.003895	0.04408	2	2	GAD1,PVALB
Pubmed	14729567	Peroxisome proliferator-activated receptor-gamma coactivator 1alpha (PGC-1alpha) regulates triglyceride metabolism by activation of the nuclear receptor FXR.		Pubmed	6.532e-05	1	0.003895	0.04408	2	2	PPARGC1A,NR1H4
Pubmed	31424658	Evaluation of the value of GATA3 combined with E-cadherin in the diagnosis of breast cancer.		Pubmed	6.532e-05	1	0.003895	0.04408	2	2	GATA3,CDH1
Pubmed	21543742	An intramolecular transport metabolon: fusion of carbonic anhydrase II to the COOH terminus of the Cl(-)/HCO(3)(-)exchanger, AE1.		Pubmed	6.532e-05	1	0.003895	0.04408	2	2	CA2,SLC4A1
Pubmed	2444457	Structure and expression of the human metallothionein genes.		Pubmed	6.532e-05	1	0.003895	0.04408	2	2	MT1F,MT1G
Pubmed	14509156	Detection of hepatocyte growth factor/scatter factor receptor (c-Met) and MUC1 from the axillary fluid drainage in patients after breast cancer surgery.		Pubmed	6.532e-05	1	0.003895	0.04408	2	2	MET,MUC1
Pubmed	31485769	EP3 receptor is a prognostic factor in TA-MUC1-negative ovarian cancer.		Pubmed	6.532e-05	1	0.003895	0.04408	2	2	PTGER3,MUC1
Pubmed	19925383	Influence of the MDR1 haplotype and CYP3A5 genotypes on cyclosporine blood level in Chinese renal transplant recipients.		Pubmed	6.532e-05	1	0.003895	0.04408	2	2	CYP3A5,ABCB1
Pubmed	25561690	CRIM1 haploinsufficiency causes defects in eye development in human and mouse.		Pubmed	6.532e-05	1	0.003895	0.04408	2	2	CRIM1,TFAP2A
Pubmed	28858992	The genotypes and methylation of MAO genes as factors behind smoking behavior.		Pubmed	6.532e-05	1	0.003895	0.04408	2	2	MAOA,MAOB
Pubmed	20373033	Effects of farnesoid X receptor on the expression of the fatty acid synthetase and hepatic lipase.		Pubmed	6.532e-05	1	0.003895	0.04408	2	2	NR1H4,LIPC
Pubmed	28651026	Binding of human plasminogen and high-molecular-mass kininogen by cell surface-exposed proteins of Candida parapsilosis.		Pubmed	6.532e-05	1	0.003895	0.04408	2	2	PLG,KNG1
Pubmed	28689648	Clinical and genetic characterization of Chinese pediatric cystine stone patients.		Pubmed	6.532e-05	1	0.003895	0.04408	2	2	SLC3A1,SLC7A9
Pubmed	22277678	Impact of CYP3A5 and ABCB1 gene polymorphisms on fentanyl pharmacokinetics and clinical responses in cancer patients undergoing conversion to a transdermal system.		Pubmed	6.532e-05	1	0.003895	0.04408	2	2	CYP3A5,ABCB1
Pubmed	26450467	Combinational Effect of CYP3A5 and MDR-1 Polymorphisms on Tacrolimus Pharmacokinetics in Liver Transplant Patients.		Pubmed	6.532e-05	1	0.003895	0.04408	2	2	CYP3A5,ABCB1
Pubmed	31400925	HER3 and HER4 are highly expressed in human meningiomas.		Pubmed	6.532e-05	1	0.003895	0.04408	2	2	ERBB3,ERBB4
Pubmed	15919447	Impact of CYP3A5 and MDR1(ABCB1) C3435T polymorphisms on the pharmacokinetics of tacrolimus in renal transplant recipients.		Pubmed	6.532e-05	1	0.003895	0.04408	2	2	CYP3A5,ABCB1
Pubmed	18216719	Genetic regulation of beta-ureidopropionase and its possible implication in altered uracil catabolism.		Pubmed	6.532e-05	1	0.003895	0.04408	2	2	UPB1,DPYS
Pubmed	20485326	Deletion of MAOA and MAOB in a male patient causes severe developmental delay, intermittent hypotonia and stereotypical hand movements.		Pubmed	6.532e-05	1	0.003895	0.04408	2	2	MAOA,MAOB
Pubmed	12563176	Monoamine oxidase polymorphisms and smoking behaviour in Japanese.		Pubmed	6.532e-05	1	0.003895	0.04408	2	2	MAOA,MAOB
Pubmed	26366614	Identification of Bile Duct Paucity in Alagille Syndrome: Using CK7 and EMA Immunohistochemistry as a Reliable Panel for Accurate Diagnosis.		Pubmed	6.532e-05	1	0.003895	0.04408	2	2	KRT7,MUC1
Pubmed	30809547	Selectivity of Dietary Phenolics for Inhibition of Human Monoamine Oxidases A and B.		Pubmed	6.532e-05	1	0.003895	0.04408	2	2	MAOA,MAOB
Pubmed	17425754	Multi-drug resistance gene-1 (MDR-1) haplotypes and the CYP3A5*1 genotype have no influence on ciclosporin dose requirements as assessed by C0 or C2 measurements.		Pubmed	6.532e-05	1	0.003895	0.04408	2	2	CYP3A5,ABCB1
Pubmed	6095291	Duplicated heavy metal control sequences of the mouse metallothionein-I gene.		Pubmed	6.532e-05	1	0.003895	0.04408	2	2	MT1E,MT1F
Pubmed	12768082	Type-IV collagen related diseases.		Pubmed	6.532e-05	1	0.003895	0.04408	2	2	COL4A3,COL4A4
Pubmed	14507670	A human-mouse chimera of the alpha3alpha4alpha5(IV) collagen protomer rescues the renal phenotype in Col4a3-/- Alport mice.		Pubmed	6.532e-05	1	0.003895	0.04408	2	2	COL4A3,COL4A4
Pubmed	20509747	Carbonic anhydrases II and XII are up-regulated in osteoclast-like cells in advanced human atherosclerotic plaques-Tampere Vascular Study.		Pubmed	6.532e-05	1	0.003895	0.04408	2	2	CA2,CA12
Pubmed	9334227	Characterization of an epithelial approximately 460-kDa protein that facilitates endocytosis of intrinsic factor-vitamin B12 and binds receptor-associated protein.		Pubmed	6.532e-05	1	0.003895	0.04408	2	2	CUBN,LRP2
Pubmed	25610371	Cerebellar transcriptional alterations with Purkinje cell dysfunction and loss in mice lacking PGC-1?.		Pubmed	6.532e-05	1	0.003895	0.04408	2	2	PPARGC1A,PVALB
Pubmed	19376366	Genetic polymorphisms in CYP3A5 and MDR1 genes and their correlations with plasma levels of tacrolimus and cyclosporine in renal transplant recipients.		Pubmed	6.532e-05	1	0.003895	0.04408	2	2	CYP3A5,ABCB1
Pubmed	27984181	AP-2? and AP-2? regulate dorsal interneuron specification in the spinal cord.		Pubmed	6.532e-05	1	0.003895	0.04408	2	2	TFAP2A,TFAP2B
Pubmed	25908454	Knockdown of c-MET induced apoptosis in ABCB1-overexpressed multidrug-resistance cancer cell lines.		Pubmed	6.532e-05	1	0.003895	0.04408	2	2	ABCB1,MET
Pubmed	26540609	Molecular and Clinical Investigation of Cystinuria in the Greek-Cypriot Population.		Pubmed	6.532e-05	1	0.003895	0.04408	2	2	SLC3A1,SLC7A9
Pubmed	22847418	Double knockout of pendrin and Na-Cl cotransporter (NCC) causes severe salt wasting, volume depletion, and renal failure.		Pubmed	6.532e-05	1	0.003895	0.04408	2	2	SLC26A4,SLC12A3
Pubmed	7792085	Distribution of the calcium binding proteins, calbindin D-28K and parvalbumin, in the subicular complex of the adult mouse.		Pubmed	6.532e-05	1	0.003895	0.04408	2	2	PVALB,CALB1
Pubmed	17942953	COL4A3/COL4A4 mutations producing focal segmental glomerulosclerosis and renal failure in thin basement membrane nephropathy.		Pubmed	6.532e-05	1	0.003895	0.04408	2	2	COL4A3,COL4A4
[truncated: 56,651 more rows]
