# Supplementary material for: Characterization of Continuous Transcriptional Heterogeneity in High-Risk Blastemal-Type Wilms’ Tumors Using Unsupervised Machine Learning
Source: Int J Mol Sci. 2023 Feb 9;24(4):3532. doi: 10.3390/ijms24043532 (PMC9965420; doi:10.3390/ijms24043532)
Supplement: Supplementary file 1 [file ijms-24-03532-s001.zip › Table S6 - GO enrichment blastemalArc.xlsx]

## Sheet: Genes list
ACTL6A
ADCY2
ADD2
ADGRA3
ADGRG2
ANP32E
APEX1
APOBEC3B
ARHGAP11A
ARID3B
ASNS
ASPM
ATAD2
ATP8A2
AUNIP
AURKA
AURKB
AUTS2
B3GALT2
BACH2
BARD1
BCL7A
BCOR
BEX1
BIRC5
BLM
BRCA1
BRINP1
BRIP1
BUB1
BUB1B
C14orf132
C1orf112
C3orf52
CA14
CACNA2D2
CADM1
CASD1
CCNA2
CCNB1
CCNB2
CCNE1
CCNE2
CCNJ
CDC20
CDC25A
CDC25C
CDC45
CDC6
CDC7
CDCA3
CDCA4
CDCA8
CDH7
CDK1
CDK2
CDK5R1
CDK8
CDKN3
CDO1
CENPA
CENPE
CENPF
CENPN
CENPQ
CENPU
CEP55
CEP76
CHD7
CHEK1
CHN1
CHRNA1
CHRNA5
CHRNA9
CITED1
CKAP2
CKS1B
CKS2
CLGN
COL13A1
COL2A1
CRABP2
CSE1L
CXXC4
DACH1
DBF4
DBN1
DENND5B
DEPDC1
DHFR
DLG5
DLGAP5
DLK1
DLL3
DNA2
DNAAF2
DNAJC9
DNMT3A
DPP6
DPYSL4
DSCC1
DTL
E2F5
E2F8
ECEL1
ECT2
EDN3
EFNA4
EFS
ELAVL4
ELOVL2
ELOVL6
ENC1
ETV1
ETV4
ETV5
EXO1
EYA1
EZH2
FAM216A
FANCI
FANCL
FBXO5
FEN1
FGF8
FOXC1
FOXD1
FOXM1
FZD10
FZD2
FZD3
FZD7
GFRA1
GINS1
GINS2
GMNN
GPC3
GREB1
H2AW
H2AX
H2AZ1
HAS2
HDAC2
HELLS
HEY1
HIC2
HJURP
HMGA2
HMGB2
HMGB3
HMGB3P1
HMMR
HOXA1
HOXA10
HOXA11
HOXA2
HOXA5
HOXA6
HOXA7
HOXB9
HOXC4
HOXC6
HOXD1
HOXD10
HOXD11
HOXD4
HSF2
IARS1
IFT81
IGF2BP2
ILF2
INPP5F
IPO9
ITGA8
ITM2C
JARID2
KDM1A
KDM5B
KIF11
KIF14
KIF15
KIF18A
KIF18B
KIF20A
KIF23
KIF2C
KIF4A
KIFC1
KLF3-AS1
KNTC1
LAPTM4B
LMNB1
LMNB2
LOC728392
LRP4
LRRC49
LRRTM2
LYPD1
LYRM4
MACROH2A2
MAD2L1
MAP2
MARCKSL1
MCM10
MCM2
MCM3
MCM3AP-AS1
MCM4
MCM6
MCM7
MDK
MEIS1
MELK
MEOX1
MEST
MEX3C
MEX3D
MIS18A
MKI67
MLLT11
MSH2
MSH6
MTHFD2L
MYB
MYCN
MYL6B
MYO10
NASP
NBAS
NCAM1
NCAPD2
NCAPG
NCAPH
NDC80
NEIL3
NEK2
NELL2
NETO2
NME1
NMU
NNAT
NOVA1
NPM3
NPTX2
NPY
NREP
NRTN
NRXN1
NSD2
NUP160
NUSAP1
ODC1
OIP5
ORC6
PAFAH1B3
PARPBP
PATZ1
PAX2
PBK
PCBP4
PCLAF
PCNA
PEG10
PEG3
PFAS
PGAP1
PIMREG
PLAAT1
PLAG1
PLK4
PNMA8A
POLE2
PPAT
PPP1R9A
PRAME
PRC1
PRIM1
PRIM2
PRKDC
PRMT1
PSRC1
PTPRG
PTTG1
PTTG3P
RACGAP1
RAD51
RAD51AP1
RAD54B
RAE1
RANBP1
RBBP4
RBP1
RFC3
RFC4
RGS17
RGS7
RNASEH2A
RNFT2
ROBO1
RPL39L
RRM1
RRM2
SAC3D1
SALL1
SALL2
SEPTIN6
SH3GL3
SINHCAF
SIX1
SIX2
SKP2
SLC15A1
SLC25A21
SLC38A1
SLIT1
SMARCC1
SMC4
SMPX
SNRPA
SNRPD1
SNRPE
SNRPF
SOBP
SOX11
SPAG5
SPC25
SPDL1
SRPK1
STAT4
STIL
STMN1
SUV39H2
SYT1
TAF5
TBC1D8
TCF3
TCF7L1
TENM4
TGIF2
TIA1
TIAM1
TIMELESS
TLE1
TLE4
TMEM100
TMEM35A
TMEM97
TMF1
TMPO
TOP2A
TPX2
TRIL
TRIP13
TTK
TUBB2B
TUSC3
TYMS
UBE2C
UBE2E3
UBE2S
UCHL1
UNC5C
UNG
VASH2
VRK1
WASF1
WASF3
WDHD1
WT1
WT1-AS
YEATS4
YPEL1
ZKSCAN7
ZMAT4
ZNF107
ZNF232
ZNF423
ZNF43
ZNF492
ZNF516
ZNF711
ZWINT

## Sheet: Toppgene results
Category	ID	Name	Selected	Source	p-value	q-value Bonferroni	q-value FDR B&H	q-value FDR B&Y	Hit Count in Query List	Hit Count in Genome	Hit in Query List
GO: Molecular Function	GO:0003690	double-stranded DNA binding			3.308e-25	2.64e-22	2.64e-22	1.916e-21	78	1048	MYCN,SOX11,KDM5B,ORC6,PATZ1,BACH2,DACH1,ETV1,ETV4,ETV5,MCM2,HMGB2,MCM3,HMGB3,MCM4,HIC2,MCM6,MCM7,ACTL6A,MCM10,BCOR,EZH2,MEIS1,STAT4,CDC45,MEOX1,HOXA2,HOXA5,HOXA6,HOXA7,HOXA10,JARID2,HOXB9,HOXC4,HOXC6,SALL2,SALL1,HOXD4,HOXD10,FEN1,PLAG1,MACROH2A2,NME1,HSF2,FOXC1,FOXD1,DNMT3A,KIF2C,RAD51,FOXM1,TCF3,RBBP4,WT1,APEX1,CHD7,MSH2,SIX1,SUV39H2,E2F8,ARID3B,ZNF711,RAD51AP1,MSH6,HMGA2,LMNB1,HEY1,ZNF516,H2AZ1…
GO: Molecular Function	GO:0043565	sequence-specific DNA binding			1.891e-23	1.509e-20	7.545e-21	5.477e-20	81	1199	MYCN,SOX11,KDM5B,ORC6,PATZ1,ZNF423,BACH2,DACH1,ETV1,ETV4,ETV5,MCM2,HMGB2,MCM3,MCM4,HIC2,MCM6,MCM7,ACTL6A,MCM10,BCOR,EZH2,MEIS1,STAT4,CDC45,HOXA1,MEOX1,HOXA2,BLM,HOXA5,HOXA6,HOXA7,HOXA10,HOXA11,JARID2,HOXB9,HOXC4,HOXC6,SALL2,SALL1,HOXD1,HOXD4,HOXD10,HOXD11,PLAG1,PRMT1,MACROH2A2,NME1,HSF2,FOXC1,FOXD1,DNMT3A,KIF2C,FOXM1,TCF3,RBBP4,NSD2,WT1,APEX1,E2F5,CHD7,MSH2,SIX1,SUV39H2,E2F8,ARID3B,ZNF711,HMGA2,L…
GO: Molecular Function	GO:1990837	sequence-specific double-stranded DNA binding			4.856e-21	3.875e-18	1.292e-18	9.379e-18	68	948	MYCN,SOX11,KDM5B,ORC6,PATZ1,BACH2,DACH1,ETV1,ETV4,ETV5,MCM2,HMGB2,MCM3,MCM4,HIC2,MCM6,MCM7,ACTL6A,MCM10,BCOR,EZH2,MEIS1,STAT4,CDC45,MEOX1,HOXA2,HOXA5,HOXA6,HOXA7,HOXA10,JARID2,HOXB9,HOXC4,HOXC6,SALL2,SALL1,HOXD4,HOXD10,PLAG1,MACROH2A2,NME1,HSF2,FOXC1,FOXD1,DNMT3A,KIF2C,FOXM1,TCF3,RBBP4,CHD7,MSH2,SIX1,SUV39H2,E2F8,ARID3B,ZNF711,HMGA2,LMNB1,HEY1,ZNF516,H2AZ1,SMARCC1,PAX2,CDC6,SIX2,KDM1A,HDAC2,MYB
GO: Molecular Function	GO:0003682	chromatin binding			4.409e-18	3.518e-15	8.795e-16	6.385e-15	51	629	BRIP1,CENPA,CENPF,PCLAF,PATZ1,ACTL6A,EZH2,MEIS1,NPM3,CDC45,MEOX1,JARID2,CKS2,SALL1,BRCA1,HOXD10,NCAPD2,MACROH2A2,FOXC1,DNMT3A,RAD51,TCF3,VRK1,RBBP4,NSD2,APEX1,CITED1,CHD7,MSH2,SIX1,ATAD2,NCAPH,SUV39H2,GMNN,ZNF711,MSH6,HMGA2,WDHD1,TLE4,EXO1,AUTS2,H2AZ1,SMARCC1,CDK1,CDC6,TCF7L1,TOP2A,KDM1A,PCNA,HDAC2,HELLS
GO: Molecular Function	GO:0008094	DNA-dependent ATPase activity			2.906e-15	2.319e-12	4.639e-13	3.368e-12	22	124	BRIP1,MCM2,MCM3,MCM4,MCM6,MCM7,GINS1,CDC45,BLM,RAD54B,DSCC1,DNA2,RAD51,RBBP4,CHD7,MSH2,RFC3,RFC4,NCAPH,MSH6,GINS2,TOP2A
GO: Molecular Function	GO:0001067	regulatory region nucleic acid binding			7.62e-15	6.08e-12	1.013e-12	7.357e-12	61	1036	MYCN,SOX11,PATZ1,BACH2,DACH1,ETV1,ETV4,ETV5,HMGB2,HIC2,ACTL6A,BCOR,EZH2,MEIS1,STAT4,MEOX1,HOXA2,HOXA5,HOXA6,HOXA7,HOXA10,JARID2,HOXB9,HOXC4,HOXC6,SALL2,SALL1,BRCA1,HOXD4,HOXD10,PLAG1,MACROH2A2,TAF5,NME1,HSF2,FOXC1,FOXD1,DNMT3A,FOXM1,TCF3,RBBP4,WT1,CITED1,CHD7,SIX1,SUV39H2,GMNN,E2F8,ARID3B,ZNF711,HMGA2,HEY1,ZNF516,H2AZ1,SMARCC1,PAX2,TCF7L1,SIX2,KDM1A,HDAC2,MYB
GO: Molecular Function	GO:0008301	DNA binding, bending			2.041e-14	1.628e-11	2.326e-12	1.689e-11	28	236	NUSAP1,CENPN,CENPA,HJURP,NASP,MCM2,OIP5,HMGB2,SRPK1,HMGB3,NCAPG,NCAPD2,MACROH2A2,FOXC1,FOXD1,RBBP4,MIS18A,CENPU,SMC4,NCAPH,CCNB1,CENPQ,HMGA2,H2AX,SMARCC1,CDK1,TOP2A,HELLS
GO: Molecular Function	GO:0000976	transcription regulatory region sequence-specific DNA binding			3.851e-14	3.073e-11	3.533e-12	2.565e-11	55	898	MYCN,SOX11,PATZ1,BACH2,DACH1,ETV1,ETV4,ETV5,HMGB2,HIC2,ACTL6A,BCOR,EZH2,MEIS1,STAT4,MEOX1,HOXA2,HOXA5,HOXA6,HOXA7,HOXA10,JARID2,HOXB9,HOXC4,HOXC6,SALL2,SALL1,HOXD4,HOXD10,PLAG1,MACROH2A2,NME1,HSF2,FOXC1,FOXD1,DNMT3A,FOXM1,TCF3,RBBP4,CHD7,SIX1,SUV39H2,E2F8,ARID3B,ZNF711,HMGA2,HEY1,ZNF516,H2AZ1,SMARCC1,PAX2,SIX2,KDM1A,HDAC2,MYB
GO: Molecular Function	GO:0140097	catalytic activity, acting on DNA			3.984e-14	3.179e-11	3.533e-12	2.565e-11	34	364	BRIP1,BARD1,MCM2,HMGB2,MCM3,MCM4,MCM6,MCM7,GINS1,CDC45,BLM,NEK2,BRCA1,RAD54B,FEN1,UNG,NME1,DSCC1,DNA2,DNMT3A,RAD51,POLE2,APEX1,CHD7,RFC3,RFC4,NCAPH,HMGA2,EXO1,GINS2,NEIL3,TOP2A,PCNA,AURKB
GO: Molecular Function	GO:0000977	RNA polymerase II transcription regulatory region sequence-specific DNA binding			6.705e-14	5.351e-11	5.351e-12	3.885e-11	53	853	MYCN,SOX11,PATZ1,BACH2,DACH1,ETV1,ETV4,ETV5,HIC2,ACTL6A,BCOR,EZH2,MEIS1,STAT4,MEOX1,HOXA2,HOXA5,HOXA6,HOXA7,HOXA10,JARID2,HOXB9,HOXC4,HOXC6,SALL2,SALL1,HOXD4,HOXD10,PLAG1,MACROH2A2,NME1,HSF2,FOXC1,FOXD1,DNMT3A,FOXM1,TCF3,RBBP4,CHD7,SIX1,SUV39H2,E2F8,ARID3B,ZNF711,HMGA2,HEY1,H2AZ1,SMARCC1,PAX2,SIX2,KDM1A,HDAC2,MYB
GO: Molecular Function	GO:0003678	DNA helicase activity			8.365e-13	6.675e-10	6.068e-11	4.405e-10	17	87	BRIP1,MCM2,MCM3,MCM4,MCM6,MCM7,GINS1,CDC45,BLM,RAD54B,DSCC1,DNA2,RAD51,CHD7,RFC3,RFC4,GINS2
GO: Molecular Function	GO:0004693	cyclin-dependent protein serine/threonine kinase activity			7.391e-12	5.898e-09	4.915e-10	3.568e-09	19	129	CDK8,CDKN3,BLM,CKS1B,CKS2,CDK5R1,PSRC1,CCNJ,STIL,CCNA2,CCNB1,CCNE1,CCNB2,CCNE2,CDK1,CDC6,CDC25A,CDC25C,CDK2
GO: Molecular Function	GO:0097472	cyclin-dependent protein kinase activity			1.285e-11	1.026e-08	7.89e-10	5.728e-09	19	133	CDK8,CDKN3,BLM,CKS1B,CKS2,CDK5R1,PSRC1,CCNJ,STIL,CCNA2,CCNB1,CCNE1,CCNB2,CCNE2,CDK1,CDC6,CDC25A,CDC25C,CDK2
GO: Molecular Function	GO:0015631	tubulin binding			3.256e-11	2.598e-08	1.856e-09	1.347e-08	31	388	NUSAP1,KIF18A,MAP2,CENPE,KIF4A,NEK2,CDK5R1,BRCA1,KIF15,NDC80,KIF14,NME1,PSRC1,KIF11,KIFC1,KIF2C,KIF23,RAE1,IFT81,BIRC5,STMN1,PRC1,ECT2,SPAG5,CCNB1,KIF20A,TIAM1,UNC5C,RACGAP1,KIF18B,AURKB
GO: Molecular Function	GO:0016887	ATPase activity			1.497e-10	1.195e-07	7.964e-09	5.782e-08	38	596	KIF18A,BRIP1,CENPE,MYO10,KIF4A,MCM2,MCM3,MCM4,MCM6,MCM7,DBN1,GINS1,CDC45,BLM,KIF15,RAD54B,DNAJC9,KIF14,DSCC1,DNA2,KIF11,KIFC1,KIF2C,RAD51,KIF23,RBBP4,CHD7,MSH2,RFC3,RFC4,ATAD2,NCAPH,KIF20A,MSH6,GINS2,KIF18B,TOP2A,HELLS
GO: Molecular Function	GO:0004386	helicase activity			2.833e-10	2.26e-07	1.413e-08	1.026e-07	20	177	BRIP1,MCM2,MCM3,MCM4,MCM6,MCM7,GINS1,CDC45,BLM,RAD54B,DSCC1,DNA2,RAD51,CHD7,MSH2,RFC3,RFC4,MSH6,GINS2,HELLS
GO: Molecular Function	GO:0008017	microtubule binding			4.992e-10	3.984e-07	2.343e-08	1.701e-07	25	288	NUSAP1,KIF18A,MAP2,CENPE,KIF4A,NEK2,KIF15,NDC80,KIF14,PSRC1,KIF11,KIFC1,KIF2C,KIF23,RAE1,BIRC5,PRC1,ECT2,SPAG5,CCNB1,KIF20A,TIAM1,RACGAP1,KIF18B,AURKB
GO: Molecular Function	GO:0003688	DNA replication origin binding			8.571e-10	6.84e-07	3.8e-08	2.759e-07	9	26	ORC6,MCM2,MCM3,MCM4,MCM6,MCM7,MCM10,CDC45,CDC6
GO: Molecular Function	GO:0017116	single-stranded DNA helicase activity			1.979e-09	1.579e-06	8.311e-08	6.033e-07	8	20	MCM2,MCM6,MCM7,DSCC1,DNA2,RAD51,RFC3,RFC4
GO: Molecular Function	GO:0003697	single-stranded DNA binding			2.516e-09	2.008e-06	1.004e-07	7.288e-07	16	124	MCM2,HMGB2,MCM3,MCM4,MCM6,MCM7,MCM10,CDC45,BLM,NME1,RAD51,SMC4,MSH2,RAD51AP1,PRIM1,NEIL3
GO: Molecular Function	GO:0003684	damaged DNA binding			4.795e-09	3.826e-06	1.822e-07	1.323e-06	12	66	HMGB2,BLM,AUNIP,BRCA1,FEN1,UNG,APEX1,MSH2,MSH6,H2AX,NEIL3,PCNA
GO: Molecular Function	GO:0000987	cis-regulatory region sequence-specific DNA binding			6.464e-09	5.159e-06	2.345e-07	1.702e-06	35	594	MYCN,SOX11,PATZ1,DACH1,ETV1,ETV4,ACTL6A,EZH2,MEIS1,STAT4,MEOX1,HOXA2,HOXA5,HOXA7,HOXA10,SALL1,PLAG1,HSF2,FOXD1,DNMT3A,TCF3,RBBP4,CHD7,SIX1,E2F8,ARID3B,HMGA2,ZNF516,H2AZ1,SMARCC1,PAX2,SIX2,KDM1A,HDAC2,MYB
GO: Molecular Function	GO:0005524	ATP binding			8.419e-09	6.718e-06	2.921e-07	2.121e-06	62	1485	CDK8,KIF18A,BRIP1,ILF2,CENPE,MYO10,ATP8A2,PBK,KIF4A,MCM2,MCM3,SRPK1,MCM4,PFAS,MCM6,MCM7,CHEK1,RRM1,TRIP13,TTK,MELK,ADCY2,CDC7,BLM,AURKA,NEK2,KIF15,BUB1,RAD54B,BUB1B,MKI67,KIF14,UBE2S,ITM2C,NME1,DNA2,UBE2E3,KIF11,KIFC1,KIF2C,RAD51,VRK1,KIF23,IARS1,UBE2C,SMC4,CHD7,MSH2,RFC4,ATAD2,KIF20A,MSH6,ASNS,CDK1,PRKDC,CDC6,KIF18B,PLK4,TOP2A,CDK2,AURKB,HELLS
GO: Molecular Function	GO:0008144	drug binding			1.046e-08	8.345e-06	3.477e-07	2.524e-06	70	1786	CDK8,KIF18A,BRIP1,ILF2,CENPE,MYO10,ATP8A2,PBK,KIF4A,MCM2,HMGB2,MCM3,SRPK1,MCM4,PFAS,MCM6,MCM7,CHEK1,RRM1,TRIP13,TTK,MELK,ADCY2,CHRNA1,CHRNA5,CDC7,BLM,TYMS,AURKA,NEK2,LYPD1,KIF15,DHFR,BUB1,RAD54B,BUB1B,MKI67,KIF14,UBE2S,PRMT1,ITM2C,NME1,DNA2,UBE2E3,KIF11,KIFC1,KIF2C,RAD51,VRK1,KIF23,IARS1,UBE2C,SMC4,CHD7,MSH2,RFC4,ATAD2,SUV39H2,KIF20A,MSH6,ASNS,CDK1,PRKDC,CDC6,KIF18B,PLK4,TOP2A,CDK2,AURKB,HELLS
GO: Molecular Function	GO:0000978	RNA polymerase II cis-regulatory region sequence-specific DNA binding			1.222e-08	9.754e-06	3.902e-07	2.833e-06	34	580	MYCN,SOX11,PATZ1,DACH1,ETV1,ETV4,ACTL6A,EZH2,MEIS1,STAT4,MEOX1,HOXA2,HOXA5,HOXA7,HOXA10,SALL1,PLAG1,HSF2,FOXD1,DNMT3A,TCF3,RBBP4,CHD7,SIX1,E2F8,ARID3B,HMGA2,H2AZ1,SMARCC1,PAX2,SIX2,KDM1A,HDAC2,MYB
GO: Molecular Function	GO:0035173	histone kinase activity			1.656e-08	1.322e-05	5.084e-07	3.691e-06	7	17	CHEK1,AURKA,VRK1,CCNB1,CDK1,CDK2,AURKB
GO: Molecular Function	GO:0000981	DNA-binding transcription factor activity, RNA polymerase II-specific			3.381e-08	2.698e-05	9.991e-07	7.254e-06	64	1615	MYCN,SOX11,KDM5B,PTTG1,TGIF2,PATZ1,ZNF423,BACH2,PEG3,DACH1,ETV1,ETV4,ETV5,HIC2,ZKSCAN7,ZNF232,EZH2,MEIS1,STAT4,HOXA1,MEOX1,HOXA2,HOXA5,HOXA6,HOXA7,HOXA10,HOXA11,JARID2,HOXB9,HOXC4,HOXC6,SALL2,SALL1,HOXD1,HOXD4,HOXD10,HOXD11,PLAG1,HSF2,ZNF107,FOXC1,FOXD1,DNMT3A,FOXM1,ZNF492,TCF3,NSD2,WT1,E2F5,SIX1,E2F8,ARID3B,ZNF711,HMGA2,WDHD1,HEY1,ZNF43,TLE4,ZNF516,SMARCC1,PAX2,TCF7L1,SIX2,MYB
GO: Molecular Function	GO:0032559	adenyl ribonucleotide binding			4.623e-08	3.69e-05	1.318e-06	9.566e-06	62	1555	CDK8,KIF18A,BRIP1,ILF2,CENPE,MYO10,ATP8A2,PBK,KIF4A,MCM2,MCM3,SRPK1,MCM4,PFAS,MCM6,MCM7,CHEK1,RRM1,TRIP13,TTK,MELK,ADCY2,CDC7,BLM,AURKA,NEK2,KIF15,BUB1,RAD54B,BUB1B,MKI67,KIF14,UBE2S,ITM2C,NME1,DNA2,UBE2E3,KIF11,KIFC1,KIF2C,RAD51,VRK1,KIF23,IARS1,UBE2C,SMC4,CHD7,MSH2,RFC4,ATAD2,KIF20A,MSH6,ASNS,CDK1,PRKDC,CDC6,KIF18B,PLK4,TOP2A,CDK2,AURKB,HELLS
GO: Molecular Function	GO:0030554	adenyl nucleotide binding			5.967e-08	4.762e-05	1.642e-06	1.192e-05	62	1566	CDK8,KIF18A,BRIP1,ILF2,CENPE,MYO10,ATP8A2,PBK,KIF4A,MCM2,MCM3,SRPK1,MCM4,PFAS,MCM6,MCM7,CHEK1,RRM1,TRIP13,TTK,MELK,ADCY2,CDC7,BLM,AURKA,NEK2,KIF15,BUB1,RAD54B,BUB1B,MKI67,KIF14,UBE2S,ITM2C,NME1,DNA2,UBE2E3,KIF11,KIFC1,KIF2C,RAD51,VRK1,KIF23,IARS1,UBE2C,SMC4,CHD7,MSH2,RFC4,ATAD2,KIF20A,MSH6,ASNS,CDK1,PRKDC,CDC6,KIF18B,PLK4,TOP2A,CDK2,AURKB,HELLS
GO: Molecular Function	GO:0043138	3'-5' DNA helicase activity			9.259e-08	7.389e-05	2.463e-06	1.788e-05	7	21	MCM2,MCM6,MCM7,GINS1,CDC45,BLM,GINS2
GO: Molecular Function	GO:0003777	microtubule motor activity			2.242e-07	0.000179	5.616e-06	4.077e-05	12	92	KIF18A,MAP2,CENPE,KIF4A,KIF15,KIF14,KIF11,KIFC1,KIF2C,KIF23,KIF20A,KIF18B
GO: Molecular Function	GO:0004674	protein serine/threonine kinase activity			2.252e-07	0.0001797	5.616e-06	4.077e-05	42	913	CDK8,CDKN3,PBK,SRPK1,CHEK1,EZH2,TTK,MELK,CDC7,BLM,AURKA,CKS1B,CKS2,NEK2,CDK5R1,NRXN1,DBF4,UCHL1,BUB1,BUB1B,PSRC1,VRK1,CCNJ,STIL,EDN3,CCNA2,CCNB1,CCNE1,HMGA2,TIAM1,CCNB2,CCNE2,FZD10,ROBO1,CDK1,PRKDC,CDC6,CDC25A,CDC25C,PLK4,CDK2,AURKB
GO: Molecular Function	GO:0001228	DNA-binding transcription activator activity, RNA polymerase II-specific			3.128e-07	0.0002496	7.564e-06	5.491e-05	28	483	MYCN,SOX11,PATZ1,ETV1,ETV4,ETV5,MEIS1,STAT4,HOXA1,MEOX1,HOXA5,HOXA7,HOXA10,HOXC4,SALL2,HOXD4,HOXD10,PLAG1,HSF2,FOXC1,FOXD1,TCF3,WT1,SIX1,ARID3B,HMGA2,SIX2,MYB
GO: Molecular Function	GO:0001216	DNA-binding transcription activator activity			3.262e-07	0.0002603	7.655e-06	5.558e-05	28	484	MYCN,SOX11,PATZ1,ETV1,ETV4,ETV5,MEIS1,STAT4,HOXA1,MEOX1,HOXA5,HOXA7,HOXA10,HOXC4,SALL2,HOXD4,HOXD10,PLAG1,HSF2,FOXC1,FOXD1,TCF3,WT1,SIX1,ARID3B,HMGA2,SIX2,MYB
GO: Molecular Function	GO:0016538	cyclin-dependent protein serine/threonine kinase regulator activity			3.794e-07	0.0003028	8.65e-06	6.28e-05	9	49	CKS1B,CKS2,CDK5R1,CCNJ,CCNA2,CCNB1,CCNE1,CCNB2,CCNE2
GO: Molecular Function	GO:0019900	kinase binding			8.308e-07	0.000663	1.842e-05	0.0001337	41	925	MYCN,MAP2,CENPE,LAPTM4B,BARD1,ADD2,AURKA,CKS1B,CKS2,NELL2,CDK5R1,FBXO5,DBF4,KIF14,PRMT1,KIF11,FOXM1,TCF3,VRK1,PPP1R9A,MSH2,CCNJ,PRC1,CCNA2,CCNB1,KIF20A,CCNE1,LMNB1,TIAM1,CCNB2,CCNE2,UNC5C,TPX2,LRP4,RACGAP1,CDC6,CDC25A,CDC25C,TOP2A,PCNA,AURKB
GO: Molecular Function	GO:0003774	motor activity			1.14e-06	0.0009096	2.458e-05	0.0001785	14	147	KIF18A,MAP2,CENPE,MYO10,KIF4A,KIF15,MYL6B,KIF14,KIF11,KIFC1,KIF2C,KIF23,KIF20A,KIF18B
GO: Molecular Function	GO:0035639	purine ribonucleoside triphosphate binding			1.666e-06	0.001329	3.498e-05	0.000254	65	1841	CDK8,KIF18A,BRIP1,ILF2,CENPE,MYO10,ATP8A2,PBK,KIF4A,MCM2,MCM3,SRPK1,MCM4,PFAS,MCM6,MCM7,TUBB2B,CHEK1,RRM1,TRIP13,TTK,MELK,ADCY2,SEPTIN6,CDC7,BLM,AURKA,NEK2,KIF15,BUB1,RAD54B,BUB1B,MKI67,KIF14,UBE2S,ITM2C,NME1,DNA2,UBE2E3,KIF11,KIFC1,KIF2C,RAD51,VRK1,KIF23,IARS1,UBE2C,SMC4,CHD7,MSH2,STMN1,RFC4,ATAD2,KIF20A,MSH6,ASNS,CDK1,PRKDC,CDC6,KIF18B,PLK4,TOP2A,CDK2,AURKB,HELLS
GO: Molecular Function	GO:0017111	nucleoside-triphosphatase activity			2.109e-06	0.001683	4.316e-05	0.0003133	54	1431	KIF18A,BRIP1,MAP2,CENPE,MYO10,KIF4A,MCM2,MCM3,MCM4,MCM6,MCM7,TUBB2B,DBN1,ARHGAP11A,EZH2,CHN1,GINS1,SEPTIN6,CDC45,BLM,KIF15,MYL6B,RAD54B,DNAJC9,KIF14,DSCC1,DNA2,KIF11,KIFC1,KIF2C,RAD51,RANBP1,KIF23,RBBP4,DEPDC1,CHD7,MSH2,RFC3,RFC4,ATAD2,NCAPH,ECT2,RGS7,KIF20A,TBC1D8,MSH6,TIAM1,RACGAP1,FZD10,GINS2,RGS17,KIF18B,TOP2A,HELLS
GO: Molecular Function	GO:0042393	histone binding			2.485e-06	0.001983	4.958e-05	0.0003599	16	203	KDM5B,HJURP,NASP,MCM2,NPM3,CKS1B,CKS2,NCAPD2,ANP32E,VRK1,RBBP4,ATAD2,MSH6,IPO9,H2AX,SMARCC1
GO: Molecular Function	GO:0016895	exodeoxyribonuclease activity, producing 5'-phosphomonoesters			3.68e-06	0.002937	7.163e-05	0.00052	8	48	BRIP1,BARD1,BLM,BRCA1,FEN1,DNA2,APEX1,EXO1
GO: Molecular Function	GO:0032555	purine ribonucleotide binding			4.048e-06	0.003231	7.692e-05	0.0005584	66	1930	CDK8,KIF18A,BRIP1,ILF2,CENPE,MYO10,ATP8A2,PBK,KIF4A,MCM2,MCM3,SRPK1,MCM4,PFAS,MCM6,MCM7,TUBB2B,CHEK1,RRM1,TRIP13,TTK,MELK,ADCY2,SEPTIN6,CDC7,BLM,AURKA,NEK2,KIF15,BUB1,RAD54B,BUB1B,MKI67,KIF14,UBE2S,ITM2C,NME1,DNA2,UBE2E3,KIF11,KIFC1,KIF2C,RAD51,RANBP1,VRK1,KIF23,IARS1,UBE2C,SMC4,CHD7,MSH2,STMN1,RFC4,ATAD2,KIF20A,MSH6,ASNS,CDK1,PRKDC,CDC6,KIF18B,PLK4,TOP2A,CDK2,AURKB,HELLS
GO: Molecular Function	GO:0004672	protein kinase activity			4.277e-06	0.003413	7.938e-05	0.0005763	50	1315	CDK8,CDKN3,CENPE,PBK,SRPK1,CHEK1,EZH2,TTK,MELK,ADCY2,CDC7,BLM,AURKA,CKS1B,CKS2,NEK2,CDK5R1,NRXN1,DBF4,UCHL1,BUB1,BUB1B,KIF14,PSRC1,TCF3,VRK1,PPP1R9A,CCNJ,STIL,ECT2,EDN3,CCNA2,CCNB1,CCNE1,EFNA4,HMGA2,TIAM1,CCNB2,CCNE2,TPX2,FZD10,ROBO1,CDK1,PRKDC,CDC6,CDC25A,CDC25C,PLK4,CDK2,AURKB
GO: Molecular Function	GO:0008092	cytoskeletal protein binding			4.493e-06	0.003585	8.149e-05	0.0005916	43	1061	NUSAP1,KIF18A,DLG5,MAP2,CENPE,MYO10,WASF3,KIF4A,MARCKSL1,DBN1,ADD2,NEK2,CDK5R1,BRCA1,KIF15,NDC80,KIF14,NME1,WASF1,PSRC1,KIF11,KIFC1,KIF2C,KIF23,RAE1,IFT81,PPP1R9A,ENC1,DPYSL4,BIRC5,STMN1,PRC1,ECT2,SPAG5,CCNB1,KIF20A,TIAM1,UNC5C,VASH2,RACGAP1,KIF18B,CDH7,AURKB
GO: Molecular Function	GO:0032553	ribonucleotide binding			5.423e-06	0.004327	9.616e-05	0.0006981	66	1947	CDK8,KIF18A,BRIP1,ILF2,CENPE,MYO10,ATP8A2,PBK,KIF4A,MCM2,MCM3,SRPK1,MCM4,PFAS,MCM6,MCM7,TUBB2B,CHEK1,RRM1,TRIP13,TTK,MELK,ADCY2,SEPTIN6,CDC7,BLM,AURKA,NEK2,KIF15,BUB1,RAD54B,BUB1B,MKI67,KIF14,UBE2S,ITM2C,NME1,DNA2,UBE2E3,KIF11,KIFC1,KIF2C,RAD51,RANBP1,VRK1,KIF23,IARS1,UBE2C,SMC4,CHD7,MSH2,STMN1,RFC4,ATAD2,KIF20A,MSH6,ASNS,CDK1,PRKDC,CDC6,KIF18B,PLK4,TOP2A,CDK2,AURKB,HELLS
GO: Molecular Function	GO:0017076	purine nucleotide binding			5.804e-06	0.004632	0.0001007	0.000731	66	1951	CDK8,KIF18A,BRIP1,ILF2,CENPE,MYO10,ATP8A2,PBK,KIF4A,MCM2,MCM3,SRPK1,MCM4,PFAS,MCM6,MCM7,TUBB2B,CHEK1,RRM1,TRIP13,TTK,MELK,ADCY2,SEPTIN6,CDC7,BLM,AURKA,NEK2,KIF15,BUB1,RAD54B,BUB1B,MKI67,KIF14,UBE2S,ITM2C,NME1,DNA2,UBE2E3,KIF11,KIFC1,KIF2C,RAD51,RANBP1,VRK1,KIF23,IARS1,UBE2C,SMC4,CHD7,MSH2,STMN1,RFC4,ATAD2,KIF20A,MSH6,ASNS,CDK1,PRKDC,CDC6,KIF18B,PLK4,TOP2A,CDK2,AURKB,HELLS
GO: Molecular Function	GO:0016462	pyrophosphatase activity			6.266e-06	0.005	0.0001061	0.0007702	54	1485	KIF18A,BRIP1,MAP2,CENPE,MYO10,KIF4A,MCM2,MCM3,MCM4,MCM6,MCM7,TUBB2B,DBN1,ARHGAP11A,EZH2,CHN1,GINS1,SEPTIN6,CDC45,BLM,KIF15,MYL6B,RAD54B,DNAJC9,KIF14,DSCC1,DNA2,KIF11,KIFC1,KIF2C,RAD51,RANBP1,KIF23,RBBP4,DEPDC1,CHD7,MSH2,RFC3,RFC4,ATAD2,NCAPH,ECT2,RGS7,KIF20A,TBC1D8,MSH6,TIAM1,RACGAP1,FZD10,GINS2,RGS17,KIF18B,TOP2A,HELLS
GO: Molecular Function	GO:0016817	hydrolase activity, acting on acid anhydrides			6.514e-06	0.005198	0.0001061	0.0007702	54	1487	KIF18A,BRIP1,MAP2,CENPE,MYO10,KIF4A,MCM2,MCM3,MCM4,MCM6,MCM7,TUBB2B,DBN1,ARHGAP11A,EZH2,CHN1,GINS1,SEPTIN6,CDC45,BLM,KIF15,MYL6B,RAD54B,DNAJC9,KIF14,DSCC1,DNA2,KIF11,KIFC1,KIF2C,RAD51,RANBP1,KIF23,RBBP4,DEPDC1,CHD7,MSH2,RFC3,RFC4,ATAD2,NCAPH,ECT2,RGS7,KIF20A,TBC1D8,MSH6,TIAM1,RACGAP1,FZD10,GINS2,RGS17,KIF18B,TOP2A,HELLS
GO: Molecular Function	GO:0016818	hydrolase activity, acting on acid anhydrides, in phosphorus-containing anhydrides			6.514e-06	0.005198	0.0001061	0.0007702	54	1487	KIF18A,BRIP1,MAP2,CENPE,MYO10,KIF4A,MCM2,MCM3,MCM4,MCM6,MCM7,TUBB2B,DBN1,ARHGAP11A,EZH2,CHN1,GINS1,SEPTIN6,CDC45,BLM,KIF15,MYL6B,RAD54B,DNAJC9,KIF14,DSCC1,DNA2,KIF11,KIFC1,KIF2C,RAD51,RANBP1,KIF23,RBBP4,DEPDC1,CHD7,MSH2,RFC3,RFC4,ATAD2,NCAPH,ECT2,RGS7,KIF20A,TBC1D8,MSH6,TIAM1,RACGAP1,FZD10,GINS2,RGS17,KIF18B,TOP2A,HELLS
GO: Molecular Function	GO:0019901	protein kinase binding			6.741e-06	0.005379	0.0001076	0.0007811	36	831	MAP2,CENPE,ADD2,AURKA,CKS1B,CKS2,NELL2,CDK5R1,FBXO5,DBF4,KIF14,PRMT1,KIF11,FOXM1,TCF3,VRK1,PPP1R9A,MSH2,CCNJ,PRC1,CCNA2,CCNB1,KIF20A,CCNE1,LMNB1,TIAM1,CCNB2,CCNE2,UNC5C,TPX2,LRP4,RACGAP1,CDC25A,CDC25C,TOP2A,PCNA
GO: Molecular Function	GO:0004529	exodeoxyribonuclease activity			9.165e-06	0.007314	0.0001434	0.001041	8	54	BRIP1,BARD1,BLM,BRCA1,FEN1,DNA2,APEX1,EXO1
GO: Molecular Function	GO:0000217	DNA secondary structure binding			1.1e-05	0.008778	0.0001688	0.001225	6	27	HMGB2,HMGB3,BLM,MSH2,MSH6,NEIL3
GO: Molecular Function	GO:0004536	deoxyribonuclease activity			1.544e-05	0.01232	0.0002324	0.001687	11	115	BRIP1,BARD1,HMGB2,BLM,BRCA1,FEN1,NME1,DNA2,APEX1,EXO1,PCNA
GO: Molecular Function	GO:0061575	cyclin-dependent protein serine/threonine kinase activator activity			1.654e-05	0.0132	0.0002444	0.001774	4	9	CKS1B,CKS2,CDK5R1,CCNB1
GO: Molecular Function	GO:0008409	5'-3' exonuclease activity			1.774e-05	0.01416	0.0002574	0.001869	7	43	BRIP1,BARD1,BLM,BRCA1,FEN1,DNA2,EXO1
GO: Molecular Function	GO:0000400	four-way junction DNA binding			1.9e-05	0.01516	0.0002707	0.001966	5	18	HMGB2,HMGB3,BLM,MSH2,MSH6
GO: Molecular Function	GO:0016796	exonuclease activity, active with either ribo- or deoxyribonucleic acids and producing 5'-phosphomonoesters			2.55e-05	0.02035	0.000357	0.002592	10	100	BRIP1,BARD1,BLM,BRCA1,FEN1,DNA2,APEX1,HMGA2,EXO1,TOP2A
GO: Molecular Function	GO:0008309	double-stranded DNA exodeoxyribonuclease activity			2.893e-05	0.02308	0.000398	0.002889	3	4	FEN1,APEX1,EXO1
GO: Molecular Function	GO:0008134	transcription factor binding			3.006e-05	0.02399	0.0004065	0.002951	32	750	CENPF,BEX1,HMGB2,HMGB3,BCOR,HOXA7,JARID2,HOXC4,SALL1,BRCA1,HOXD4,FOXC1,DNMT3A,TCF3,APEX1,E2F5,SIX1,GMNN,E2F8,CCNE1,HMGA2,HEY1,TLE1,TLE4,ZNF516,PAX2,PRKDC,PRAME,SIX2,KDM1A,PCNA,HDAC2
GO: Molecular Function	GO:0031490	chromatin DNA binding			3.92e-05	0.03128	0.0005214	0.003785	11	127	CENPA,ACTL6A,EZH2,MACROH2A2,RBBP4,APEX1,ZNF711,HMGA2,H2AZ1,SMARCC1,HDAC2
GO: Molecular Function	GO:0004523	RNA-DNA hybrid ribonuclease activity			4.199e-05	0.0335	0.0005492	0.003988	4	11	FEN1,RNASEH2A,APEX1,EXO1
GO: Molecular Function	GO:0035312	5'-3' exodeoxyribonuclease activity			4.454e-05	0.03554	0.0005733	0.004162	6	34	BRIP1,BARD1,BLM,BRCA1,DNA2,EXO1
GO: Molecular Function	GO:0016773	phosphotransferase activity, alcohol group as acceptor			5.145e-05	0.04106	0.0006517	0.004731	50	1444	CDK8,CDKN3,CENPE,PBK,SRPK1,CHEK1,EZH2,TTK,MELK,ADCY2,CDC7,BLM,AURKA,CKS1B,CKS2,NEK2,CDK5R1,NRXN1,DBF4,UCHL1,BUB1,BUB1B,KIF14,PSRC1,TCF3,VRK1,PPP1R9A,CCNJ,STIL,ECT2,EDN3,CCNA2,CCNB1,CCNE1,EFNA4,HMGA2,TIAM1,CCNB2,CCNE2,TPX2,FZD10,ROBO1,CDK1,PRKDC,CDC6,CDC25A,CDC25C,PLK4,CDK2,AURKB
GO: Molecular Function	GO:0016772	transferase activity, transferring phosphorus-containing groups			6.529e-05	0.0521	0.0008141	0.00591	60	1859	CDK8,CDKN3,CENPE,PBK,SRPK1,CHEK1,EZH2,TTK,MELK,ADCY2,CDC7,BLM,AURKA,CKS1B,CKS2,NEK2,CDK5R1,NRXN1,DBF4,UCHL1,BUB1,BUB1B,KIF14,NME1,DSCC1,NUP160,PSRC1,TCF3,VRK1,RAE1,POLE2,PPP1R9A,CCNJ,STIL,RFC3,RFC4,ECT2,EDN3,CCNA2,CCNB1,CCNE1,EFNA4,HMGA2,TIAM1,CCNB2,CCNE2,PRIM1,PRIM2,TPX2,FZD10,ROBO1,CDK1,PRKDC,CDC6,CDC25A,CDC25C,PLK4,TOP2A,CDK2,AURKB
GO: Molecular Function	GO:0031492	nucleosomal DNA binding			9.142e-05	0.07295	0.001122	0.008148	7	55	CENPA,ACTL6A,RBBP4,HMGA2,H2AZ1,SMARCC1,HDAC2
GO: Molecular Function	GO:0019104	DNA N-glycosylase activity			0.0001216	0.09702	0.00147	0.01067	4	14	UNG,APEX1,NEIL3,PCNA
GO: Molecular Function	GO:0016301	kinase activity			0.0001331	0.1062	0.001586	0.01151	53	1621	CDK8,CDKN3,CENPE,PBK,SRPK1,CHEK1,EZH2,TTK,MELK,ADCY2,CDC7,BLM,AURKA,CKS1B,CKS2,NEK2,CDK5R1,NRXN1,DBF4,UCHL1,BUB1,BUB1B,KIF14,NME1,NUP160,PSRC1,TCF3,VRK1,RAE1,PPP1R9A,CCNJ,STIL,ECT2,EDN3,CCNA2,CCNB1,CCNE1,EFNA4,HMGA2,TIAM1,CCNB2,CCNE2,TPX2,FZD10,ROBO1,CDK1,PRKDC,CDC6,CDC25A,CDC25C,PLK4,CDK2,AURKB
GO: Molecular Function	GO:0035174	histone serine kinase activity			0.0001405	0.1121	0.001601	0.01162	3	6	AURKA,VRK1,AURKB
GO: Molecular Function	GO:0043515	kinetochore binding			0.0001405	0.1121	0.001601	0.01162	3	6	CENPE,TTK,SPDL1
GO: Molecular Function	GO:0032135	DNA insertion or deletion binding			0.0001405	0.1121	0.001601	0.01162	3	6	MSH2,MSH6,PCNA
GO: Molecular Function	GO:0032405	MutLalpha complex binding			0.0002422	0.1933	0.002723	0.01977	3	7	MSH2,MSH6,PCNA
GO: Molecular Function	GO:0031491	nucleosome binding			0.000251	0.2003	0.002782	0.0202	8	85	CENPA,ACTL6A,VRK1,RBBP4,HMGA2,H2AZ1,SMARCC1,HDAC2
GO: Molecular Function	GO:0042802	identical protein binding			0.0002586	0.2064	0.002827	0.02053	61	1997	CENPF,ZNF423,HJURP,BARD1,OIP5,NCAM1,MCM6,MCM10,RRM1,RRM2,TRIP13,TTK,ADD2,STAT4,HOXA1,BLM,TYMS,NELL2,CADM1,BRCA1,PTPRG,NDC80,SYT1,PRMT1,TIMELESS,TAF5,NME1,HSF2,DNMT3A,COL2A1,RAD51,TCF3,PPP1R9A,SH3GL3,BIRC5,CITED1,MSH2,ODC1,STIL,INPP5F,PRC1,ECT2,SKP2,E2F8,MSH6,TENM4,HEY1,TLE1,ASNS,PAFAH1B3,LRP4,TMPO,ROBO1,HAS2,SNRPA,FZD2,CDH7,PLK4,TOP2A,MAD2L1,PCNA
GO: Molecular Function	GO:0004527	exonuclease activity			0.0002821	0.2251	0.003042	0.02208	10	133	BRIP1,BARD1,BLM,BRCA1,FEN1,DNA2,APEX1,HMGA2,EXO1,TOP2A
GO: Molecular Function	GO:0042813	Wnt-activated receptor activity			0.0003494	0.2788	0.003718	0.02699	4	18	FZD7,FZD3,FZD10,FZD2
GO: Molecular Function	GO:0017108	5'-flap endonuclease activity			0.000382	0.3048	0.003901	0.02832	3	8	FEN1,DNA2,EXO1
GO: Molecular Function	GO:0010997	anaphase-promoting complex binding			0.000382	0.3048	0.003901	0.02832	3	8	FBXO5,UBE2S,CDC20
GO: Molecular Function	GO:0016890	site-specific endodeoxyribonuclease activity, specific for altered base			0.0003862	0.3082	0.003901	0.02832	2	2	DNA2,APEX1
GO: Molecular Function	GO:0032143	single thymine insertion binding			0.0003862	0.3082	0.003901	0.02832	2	2	MSH2,MSH6
GO: Molecular Function	GO:0048256	flap endonuclease activity			0.0005647	0.4507	0.005496	0.0399	3	9	FEN1,DNA2,EXO1
GO: Molecular Function	GO:0033170	protein-DNA loading ATPase activity			0.0005647	0.4507	0.005496	0.0399	3	9	DSCC1,RFC3,RFC4
GO: Molecular Function	GO:0003689	DNA clamp loader activity			0.0005647	0.4507	0.005496	0.0399	3	9	DSCC1,RFC3,RFC4
GO: Molecular Function	GO:0003712	transcription coregulator activity			0.0006986	0.5574	0.006716	0.04876	24	597	SOX11,KDM5B,HMGB2,ACTL6A,BCOR,EZH2,TRIP13,HOXC6,BRCA1,HSF2,FOXC1,DNMT3A,TCF3,APEX1,CITED1,GMNN,E2F8,CCNE1,HMGA2,TLE1,TLE4,TMF1,SMARCC1,KDM1A
GO: Molecular Function	GO:0016799	hydrolase activity, hydrolyzing N-glycosyl compounds			0.0007854	0.6268	0.007293	0.05295	4	22	UNG,APEX1,NEIL3,PCNA
GO: Molecular Function	GO:1990446	U1 snRNP binding			0.0007951	0.6345	0.007293	0.05295	3	10	SNRPA,SNRPD1,SNRPE
GO: Molecular Function	GO:0032453	histone demethylase activity (H3-K4 specific)			0.0007951	0.6345	0.007293	0.05295	3	10	KDM5B,JARID2,KDM1A
GO: Molecular Function	GO:0032357	oxidized purine DNA binding			0.0007951	0.6345	0.007293	0.05295	3	10	BLM,MSH2,MSH6
GO: Molecular Function	GO:0032404	mismatch repair complex binding			0.001078	0.8599	0.009224	0.06697	3	11	MSH2,MSH6,PCNA
GO: Molecular Function	GO:0032356	oxidized DNA binding			0.001078	0.8599	0.009224	0.06697	3	11	BLM,MSH2,MSH6
GO: Molecular Function	GO:0008022	protein C-terminus binding			0.001087	0.8678	0.009224	0.06697	13	245	CENPF,HIC2,MKI67,SYT1,RAD51,PPP1R9A,SH3GL3,CITED1,MSH2,YEATS4,CDC20,TOP2A,MAD2L1
GO: Molecular Function	GO:0061731	ribonucleoside-diphosphate reductase activity			0.001121	0.8947	0.009224	0.06697	2	3	RRM1,RRM2
GO: Molecular Function	GO:0032142	single guanine insertion binding			0.001121	0.8947	0.009224	0.06697	2	3	MSH2,MSH6
GO: Molecular Function	GO:0032139	dinucleotide insertion or deletion binding			0.001121	0.8947	0.009224	0.06697	2	3	MSH2,PCNA
GO: Molecular Function	GO:0003896	DNA primase activity			0.001121	0.8947	0.009224	0.06697	2	3	PRIM1,PRIM2
GO: Molecular Function	GO:0004748	ribonucleoside-diphosphate reductase activity, thioredoxin disulfide as acceptor			0.001121	0.8947	0.009224	0.06697	2	3	RRM1,RRM2
GO: Molecular Function	GO:0016728	oxidoreductase activity, acting on CH or CH2 groups, disulfide as acceptor			0.001121	0.8947	0.009224	0.06697	2	3	RRM1,RRM2
GO: Molecular Function	GO:1990518	single-stranded 3'-5' DNA helicase activity			0.001121	0.8947	0.009224	0.06697	2	3	MCM6,MCM7
GO: Molecular Function	GO:0004518	nuclease activity			0.001222	0.9751	0.00995	0.07224	15	311	BRIP1,BARD1,HMGB2,BLM,BRCA1,PGAP1,FEN1,NME1,DNA2,RNASEH2A,APEX1,HMGA2,EXO1,TOP2A,PCNA
GO: Molecular Function	GO:0070990	snRNP binding			0.001416	1	0.01141	0.08287	3	12	SNRPA,SNRPD1,SNRPE
GO: Molecular Function	GO:0008574	ATP-dependent microtubule motor activity, plus-end-directed			0.001745	1	0.01393	0.1011	4	27	KIF18A,KIF14,KIF11,KIF18B
GO: Molecular Function	GO:0034648	histone demethylase activity (H3-dimethyl-K4 specific)			0.002213	1	0.01682	0.1221	2	4	KDM5B,KDM1A
GO: Molecular Function	GO:0004844	uracil DNA N-glycosylase activity			0.002213	1	0.01682	0.1221	2	4	UNG,APEX1
GO: Molecular Function	GO:0097506	deaminated base DNA N-glycosylase activity			0.002213	1	0.01682	0.1221	2	4	UNG,APEX1
GO: Molecular Function	GO:0032137	guanine/thymine mispair binding			0.002213	1	0.01682	0.1221	2	4	MSH2,MSH6
GO: Molecular Function	GO:0032138	single base insertion or deletion binding			0.002213	1	0.01682	0.1221	2	4	MSH2,MSH6
GO: Molecular Function	GO:0030983	mismatched DNA binding			0.002276	1	0.01698	0.1232	3	14	MSH2,MSH6,PCNA
GO: Molecular Function	GO:0003906	DNA-(apurinic or apyrimidinic site) endonuclease activity			0.002276	1	0.01698	0.1232	3	14	APEX1,HMGA2,NEIL3
GO: Molecular Function	GO:0016893	endonuclease activity, active with either ribo- or deoxyribonucleic acids and producing 5'-phosphomonoesters			0.002579	1	0.01906	0.1383	5	49	FEN1,DNA2,RNASEH2A,APEX1,EXO1
GO: Molecular Function	GO:0046875	ephrin receptor binding			0.002943	1	0.02155	0.1564	4	31	CHN1,CDK5R1,EFNA4,TIAM1
GO: Molecular Function	GO:0070742	C2H2 zinc finger domain binding			0.003402	1	0.02431	0.1765	3	16	WT1,HMGA2,PAX2
GO: Molecular Function	GO:0022848	acetylcholine-gated cation-selective channel activity			0.003402	1	0.02431	0.1765	3	16	CHRNA1,CHRNA5,CHRNA9
GO: Molecular Function	GO:0044877	protein-containing complex binding			0.003411	1	0.02431	0.1765	41	1356	PTTG1,CENPA,CENPE,CENPF,MYO10,NASP,ACTL6A,DBN1,EZH2,TTK,ADCY2,GFRA1,ADD2,SPDL1,CDK5R1,SALL2,SALL1,FBXO5,UBE2S,PRMT1,UNG,NME1,VRK1,RBBP4,PPP1R9A,APEX1,MSH2,CCNB1,CCNE1,MSH6,HMGA2,H2AZ1,SMARCC1,CDC20,SNRPA,SNRPD1,SNRPE,SIX2,PCNA,CDK2,HDAC2
GO: Molecular Function	GO:0046982	protein heterodimerization activity			0.003534	1	0.02496	0.1812	23	637	CENPA,ZNF423,BARD1,TUBB2B,ADCY2,CHRNA5,MEIS1,ADD2,AURKA,H2AW,SYT1,MACROH2A2,TIMELESS,TCF3,SMC4,BIRC5,TENM4,HEY1,PAFAH1B3,H2AX,H2AZ1,FZD2,TOP2A
GO: Molecular Function	GO:0019904	protein domain specific binding			0.003717	1	0.02602	0.1889	28	833	PTTG1,EFS,HMGB2,NCAM1,CHEK1,RRM1,MEOX1,FZD7,PTTG3P,HOXC4,CADM1,KIF14,TCF3,FZD3,PPP1R9A,WT1,CITED1,CCNA2,HMGA2,CXXC4,ROBO1,PAX2,PRKDC,CDC25C,FZD2,CDK2,HDAC2,MYB
GO: Molecular Function	GO:0019887	protein kinase regulator activity			0.004048	1	0.02801	0.2034	10	189	CKS1B,CKS2,CDK5R1,DBF4,CCNJ,CCNA2,CCNB1,CCNE1,CCNB2,CCNE2
GO: Molecular Function	GO:0016888	endodeoxyribonuclease activity, producing 5'-phosphomonoesters			0.004072	1	0.02801	0.2034	3	17	FEN1,DNA2,EXO1
GO: Molecular Function	GO:0003887	DNA-directed DNA polymerase activity			0.004608	1	0.03143	0.2282	4	35	DSCC1,POLE2,RFC3,RFC4
GO: Molecular Function	GO:0046983	protein dimerization activity			0.005016	1	0.03392	0.2463	45	1557	MYCN,CENPA,CENPF,ZNF423,BARD1,TUBB2B,RRM2,TTK,ADCY2,CHRNA5,MEIS1,ADD2,BLM,TYMS,AURKA,H2AW,CADM1,SYT1,MACROH2A2,TIMELESS,TAF5,HSF2,TCF3,PPP1R9A,SMC4,BIRC5,CITED1,E2F5,MSH2,ODC1,INPP5F,ECT2,E2F8,MSH6,TENM4,HEY1,ASNS,PAFAH1B3,H2AX,LRP4,H2AZ1,FZD2,CDH7,TOP2A,MAD2L1
GO: Molecular Function	GO:0016891	endoribonuclease activity, producing 5'-phosphomonoesters			0.005105	1	0.03424	0.2486	4	36	FEN1,RNASEH2A,APEX1,EXO1
GO: Molecular Function	GO:0005105	type 1 fibroblast growth factor receptor binding			0.005391	1	0.03556	0.2581	2	6	NRXN1,FGF8
GO: Molecular Function	GO:0034647	histone demethylase activity (H3-trimethyl-K4 specific)			0.005391	1	0.03556	0.2581	2	6	KDM5B,JARID2
GO: Molecular Function	GO:0009922	fatty acid elongase activity			0.007451	1	0.04611	0.3347	2	7	ELOVL2,ELOVL6
GO: Molecular Function	GO:0035184	histone threonine kinase activity			0.007451	1	0.04611	0.3347	2	7	CHEK1,VRK1
GO: Molecular Function	GO:0102756	very-long-chain 3-ketoacyl-CoA synthase activity			0.007451	1	0.04611	0.3347	2	7	ELOVL2,ELOVL6
GO: Molecular Function	GO:0019237	centromeric DNA binding			0.007451	1	0.04611	0.3347	2	7	KIF2C,MSH2
GO: Molecular Function	GO:0102336	3-oxo-arachidoyl-CoA synthase activity			0.007451	1	0.04611	0.3347	2	7	ELOVL2,ELOVL6
GO: Molecular Function	GO:0102338	3-oxo-lignoceronyl-CoA synthase activity			0.007451	1	0.04611	0.3347	2	7	ELOVL2,ELOVL6
GO: Molecular Function	GO:0102337	3-oxo-cerotoyl-CoA synthase activity			0.007451	1	0.04611	0.3347	2	7	ELOVL2,ELOVL6
GO: Molecular Function	GO:0017147	Wnt-protein binding			0.007454	1	0.04611	0.3347	4	40	FZD7,FZD3,FZD10,FZD2
GO: Molecular Function	GO:0070182	DNA polymerase binding			0.007519	1	0.04615	0.3351	3	21	RAD51,FANCI,PCNA
GO: Molecular Function	GO:0034061	DNA polymerase activity			0.007617	1	0.0464	0.3369	8	145	NEK2,DSCC1,POLE2,RFC3,RFC4,HMGA2,TOP2A,AURKB
GO: Molecular Function	GO:0051539	4 iron, 4 sulfur cluster binding			0.008135	1	0.04918	0.357	4	41	BRIP1,DNA2,PPAT,PRIM2
GO: Biological Process	GO:0000278	mitotic cell cycle	1		2.329e-69	1.159e-65	3.862e-66	3.511e-65	129	1083	NUSAP1,KNTC1,CDKN3,KIF18A,PTTG1,CENPA,CENPE,CENPF,ORC6,DLGAP5,SPC25,PBK,NASP,KIF4A,MCM2,MCM3,MCM4,MCM6,MCM7,TUBB2B,BRINP1,CEP76,CHEK1,HMMR,EYA1,MCM10,RRM1,RRM2,EZH2,TRIP13,TTK,MELK,GINS1,SEPTIN6,SPDL1,CDC7,CDC45,BLM,TYMS,AURKA,CKS1B,CKS2,NEK2,PTTG3P,NCAPG,FBXO5,BRCA1,KIF15,NDC80,DBF4,DHFR,BUB1,BUB1B,NCAPD2,MKI67,KIF14,UBE2S,PRMT1,FGF8,DSCC1,DNA2,PCBP4,PSRC1,FOXC1,KIF11,KIFC1,DNMT3A,KIF2C,RAD51,FO…
GO: Biological Process	GO:0140014	mitotic nuclear division			2.329e-69	1.159e-65	3.862e-66	3.511e-65	129	1083	NUSAP1,KNTC1,CDKN3,KIF18A,PTTG1,CENPA,CENPE,CENPF,ORC6,DLGAP5,SPC25,PBK,NASP,KIF4A,MCM2,MCM3,MCM4,MCM6,MCM7,TUBB2B,BRINP1,CEP76,CHEK1,HMMR,EYA1,MCM10,RRM1,RRM2,EZH2,TRIP13,TTK,MELK,GINS1,SEPTIN6,SPDL1,CDC7,CDC45,BLM,TYMS,AURKA,CKS1B,CKS2,NEK2,PTTG3P,NCAPG,FBXO5,BRCA1,KIF15,NDC80,DBF4,DHFR,BUB1,BUB1B,NCAPD2,MKI67,KIF14,UBE2S,PRMT1,FGF8,DSCC1,DNA2,PCBP4,PSRC1,FOXC1,KIF11,KIFC1,DNMT3A,KIF2C,RAD51,FO…
GO: Biological Process	GO:1903047	mitotic cell cycle process			2.329e-69	1.159e-65	3.862e-66	3.511e-65	129	1083	NUSAP1,KNTC1,CDKN3,KIF18A,PTTG1,CENPA,CENPE,CENPF,ORC6,DLGAP5,SPC25,PBK,NASP,KIF4A,MCM2,MCM3,MCM4,MCM6,MCM7,TUBB2B,BRINP1,CEP76,CHEK1,HMMR,EYA1,MCM10,RRM1,RRM2,EZH2,TRIP13,TTK,MELK,GINS1,SEPTIN6,SPDL1,CDC7,CDC45,BLM,TYMS,AURKA,CKS1B,CKS2,NEK2,PTTG3P,NCAPG,FBXO5,BRCA1,KIF15,NDC80,DBF4,DHFR,BUB1,BUB1B,NCAPD2,MKI67,KIF14,UBE2S,PRMT1,FGF8,DSCC1,DNA2,PCBP4,PSRC1,FOXC1,KIF11,KIFC1,DNMT3A,KIF2C,RAD51,FO…
GO: Biological Process	GO:0000280	nuclear division			3.233e-69	1.608e-65	4.021e-66	3.655e-65	137	1256	NUSAP1,KNTC1,CDKN3,KIF18A,PTTG1,BRIP1,CLGN,CENPA,CENPE,CENPF,ORC6,DLGAP5,SPC25,PBK,NASP,KIF4A,MCM2,MCM3,MCM4,MCM6,MCM7,TUBB2B,BRINP1,CEP76,CHEK1,HMMR,EYA1,MCM10,RRM1,RRM2,EZH2,TRIP13,TTK,MELK,GINS1,SEPTIN6,SPDL1,CDC7,CDC45,BLM,TYMS,AURKA,CKS1B,CKS2,NEK2,PTTG3P,NCAPG,FBXO5,BRCA1,KIF15,NDC80,DBF4,DHFR,BUB1,RAD54B,BUB1B,NCAPD2,MKI67,ASPM,KIF14,UBE2S,PRMT1,FGF8,DSCC1,DNA2,PCBP4,PSRC1,FOXC1,KIF11,KIFC…
GO: Biological Process	GO:0048285	organelle fission			3e-67	1.492e-63	2.985e-64	2.713e-63	137	1301	NUSAP1,KNTC1,CDKN3,KIF18A,PTTG1,BRIP1,CLGN,CENPA,CENPE,CENPF,ORC6,DLGAP5,SPC25,PBK,NASP,KIF4A,MCM2,MCM3,MCM4,MCM6,MCM7,TUBB2B,BRINP1,CEP76,CHEK1,HMMR,EYA1,MCM10,RRM1,RRM2,EZH2,TRIP13,TTK,MELK,GINS1,SEPTIN6,SPDL1,CDC7,CDC45,BLM,TYMS,AURKA,CKS1B,CKS2,NEK2,PTTG3P,NCAPG,FBXO5,BRCA1,KIF15,NDC80,DBF4,DHFR,BUB1,RAD54B,BUB1B,NCAPD2,MKI67,ASPM,KIF14,UBE2S,PRMT1,FGF8,DSCC1,DNA2,PCBP4,PSRC1,FOXC1,KIF11,KIFC…
GO: Biological Process	GO:0022402	cell cycle process			1.834e-65	9.12e-62	1.52e-62	1.382e-61	149	1632	NUSAP1,KNTC1,CDKN3,KIF18A,PTTG1,BRIP1,CLGN,CENPA,CENPE,CENPF,PCLAF,ORC6,DLGAP5,SPC25,PBK,DACH1,BARD1,NASP,KIF4A,MCM2,MCM3,MCM4,MCM6,MCM7,TUBB2B,BRINP1,CEP76,CHEK1,HMMR,EYA1,MCM10,RRM1,RRM2,EZH2,TRIP13,TTK,MELK,GINS1,SEPTIN6,SPDL1,CDC7,CDC45,BLM,TYMS,AURKA,CKS1B,CKS2,NEK2,PTTG3P,CDK5R1,NCAPG,AUNIP,FBXO5,BRCA1,KIF15,NDC80,DBF4,DHFR,BUB1,RAD54B,BUB1B,FEN1,NCAPD2,MKI67,ASPM,KIF14,UBE2S,PRMT1,FGF8,SAC…
GO: Biological Process	GO:0007049	cell cycle			6.638e-63	3.302e-59	4.716e-60	4.287e-59	159	1971	CDK8,NUSAP1,CDCA3,KNTC1,SOX11,CDKN3,KIF18A,PTTG1,BRIP1,CLGN,CENPA,CENPE,CENPF,PCLAF,ORC6,BEX1,DLGAP5,HJURP,SPC25,PBK,DACH1,BARD1,NASP,KIF4A,MCM2,OIP5,MCM3,MCM4,MCM6,MCM7,TUBB2B,BRINP1,CEP76,CHEK1,HMMR,EYA1,MCM10,RRM1,RRM2,EZH2,TRIP13,TTK,MELK,GINS1,SEPTIN6,SPDL1,CDC7,CDC45,BLM,TYMS,AURKA,CKS1B,CKS2,NEK2,PTTG3P,CDK5R1,NCAPG,AUNIP,FBXO5,BRCA1,KIF15,NDC80,DBF4,DHFR,BUB1,RAD54B,BUB1B,FEN1,NCAPD2,MKI6…
GO: Biological Process	GO:0051276	chromosome organization			1.967e-50	9.785e-47	1.223e-47	1.112e-46	118	1287	NUSAP1,KIF18A,KDM5B,PTTG1,BRIP1,CENPN,CENPA,CENPE,CENPF,DLGAP5,HJURP,NASP,KIF4A,MCM2,OIP5,HMGB2,MCM3,SRPK1,HMGB3,MCM4,MCM6,MCM7,ACTL6A,CHEK1,EYA1,BCOR,EZH2,TRIP13,TTK,GINS1,NPM3,SPDL1,CDC45,BLM,AURKA,JARID2,H2AW,NEK2,PTTG3P,NCAPG,FBXO5,BRCA1,NDC80,BUB1,RAD54B,BUB1B,FEN1,NCAPD2,MKI67,KIF14,ANP32E,PRMT1,MACROH2A2,TAF5,DSCC1,DNA2,PSRC1,KIFC1,DNMT3A,KIF2C,RAD51,TCF3,VRK1,KIF23,RAE1,RBBP4,NSD2,POLE2,M…
GO: Biological Process	GO:0051301	cell division			1.029e-43	5.117e-40	5.686e-41	5.168e-40	85	725	NUSAP1,CDCA3,KNTC1,SOX11,PTTG1,BRIP1,CENPA,CENPE,CENPF,ORC6,SPC25,ETV5,KIF4A,OIP5,HMGB2,MDK,SEPTIN6,SPDL1,CDC7,BLM,FZD7,AURKA,CKS1B,CKS2,NEK2,HOXC4,NCAPG,FBXO5,NDC80,BUB1,BUB1B,NCAPD2,ASPM,KIF14,UBE2S,FGF8,SAC3D1,PIMREG,TIMELESS,PSRC1,KIF11,KIFC1,KIF2C,VRK1,KIF23,RAE1,FZD3,MIS18A,UBE2C,SMC4,BIRC5,CITED1,STMN1,PRC1,NCAPH,ECT2,CDCA8,E2F8,SPAG5,CCNA2,ZWINT,CCNB1,CEP55,KIF20A,CCNE1,HMGA2,CCNB2,CCNE2,…
GO: Biological Process	GO:0044772	mitotic cell cycle phase transition			3.341e-40	1.662e-36	1.662e-37	1.51e-36	76	622	KNTC1,CDKN3,CENPE,CENPF,ORC6,DLGAP5,NASP,MCM2,MCM3,MCM4,MCM6,MCM7,CEP76,CHEK1,HMMR,MCM10,RRM2,EZH2,TRIP13,TTK,MELK,SPDL1,CDC7,CDC45,BLM,TYMS,AURKA,CKS1B,CKS2,NEK2,FBXO5,BRCA1,NDC80,DBF4,DHFR,BUB1,BUB1B,KIF14,UBE2S,PRMT1,PCBP4,FOXM1,TCF3,POLE2,UBE2C,DTL,APEX1,BIRC5,E2F5,CCNJ,PPAT,SKP2,GMNN,E2F8,CCNA2,CCNB1,CCNE1,HMGA2,LMNB1,CCNB2,CCNE2,PRIM1,PRIM2,TPX2,CDK1,PRKDC,CDC6,CDC20,CDC25A,CDC25C,PLK4,MAD2…
GO: Biological Process	GO:0044770	cell cycle phase transition			6.333e-39	3.15e-35	2.864e-36	2.603e-35	77	668	KNTC1,CDKN3,CENPE,CENPF,ORC6,DLGAP5,NASP,MCM2,MCM3,MCM4,MCM6,MCM7,CEP76,CHEK1,HMMR,MCM10,RRM2,EZH2,TRIP13,TTK,MELK,SPDL1,CDC7,CDC45,BLM,TYMS,AURKA,CKS1B,CKS2,NEK2,FBXO5,BRCA1,NDC80,DBF4,DHFR,BUB1,BUB1B,KIF14,UBE2S,PRMT1,TIMELESS,PCBP4,FOXM1,TCF3,POLE2,UBE2C,DTL,APEX1,BIRC5,E2F5,CCNJ,PPAT,SKP2,GMNN,E2F8,CCNA2,CCNB1,CCNE1,HMGA2,LMNB1,CCNB2,CCNE2,PRIM1,PRIM2,TPX2,CDK1,PRKDC,CDC6,CDC20,CDC25A,CDC25C,…
GO: Biological Process	GO:0007059	chromosome segregation			3.041e-34	1.513e-30	1.261e-31	1.146e-30	54	342	NUSAP1,KIF18A,PTTG1,BRIP1,CENPN,CENPE,CENPF,DLGAP5,HJURP,SPC25,KIF4A,OIP5,SRPK1,TRIP13,TTK,SPDL1,NEK2,PTTG3P,NCAPG,FBXO5,BRCA1,NDC80,BUB1,BUB1B,FEN1,NCAPD2,MKI67,KIF14,DSCC1,PSRC1,KIFC1,KIF2C,KIF23,MIS18A,SMC4,BIRC5,PRC1,NCAPH,ECT2,CDCA8,SPAG5,ZWINT,CCNB1,CEP55,CENPQ,CCNE1,CCNE2,RACGAP1,CDC6,CDC20,KIF18B,TOP2A,MAD2L1,AURKB
GO: Biological Process	GO:0051726	regulation of cell cycle			4.094e-34	2.036e-30	1.566e-31	1.424e-30	98	1295	CDK8,NUSAP1,KNTC1,SOX11,CDKN3,PTTG1,BRIP1,CENPE,CENPF,PCLAF,DLGAP5,DACH1,BARD1,BRINP1,CEP76,CHEK1,HMMR,RRM2,EZH2,TRIP13,TTK,SPDL1,CDC7,CDC45,BLM,AURKA,CKS1B,CKS2,NEK2,PTTG3P,CDK5R1,FBXO5,BRCA1,NDC80,DBF4,BUB1,BUB1B,FEN1,MKI67,ASPM,KIF14,PRMT1,FGF8,TIMELESS,DNA2,PCBP4,PSRC1,FOXC1,KIF11,RAD51,FOXM1,RANBP1,TCF3,KIF23,RAE1,FZD3,RBBP4,UBE2C,DTL,APEX1,BIRC5,E2F5,MSH2,CCNJ,STIL,PRC1,ECT2,SKP2,GMNN,E2F8,…
GO: Biological Process	GO:0000070	mitotic sister chromatid segregation			1.926e-32	9.577e-29	6.841e-30	6.218e-29	39	160	NUSAP1,KIF18A,PTTG1,CENPE,CENPF,DLGAP5,KIF4A,TRIP13,TTK,SPDL1,NEK2,PTTG3P,NCAPG,FBXO5,NDC80,BUB1,BUB1B,NCAPD2,KIF14,DSCC1,PSRC1,KIFC1,KIF2C,KIF23,SMC4,BIRC5,PRC1,NCAPH,CDCA8,SPAG5,ZWINT,CCNB1,CEP55,RACGAP1,CDC6,CDC20,KIF18B,MAD2L1,AURKB
GO: Biological Process	GO:0006260	DNA replication			1.608e-31	7.998e-28	5.332e-29	4.847e-28	48	289	BRIP1,PCLAF,ORC6,DACH1,BARD1,NASP,MCM2,MCM3,MCM4,MCM6,MCM7,CHEK1,MCM10,RRM1,RRM2,GINS1,CDC7,CDC45,BLM,FBXO5,BRCA1,DBF4,FEN1,TIMELESS,DSCC1,DNA2,RAD51,RNASEH2A,RBBP4,POLE2,DTL,RFC3,RFC4,GMNN,E2F8,CCNA2,CCNE1,MSH6,WDHD1,CCNE2,PRIM1,PRIM2,EXO1,GINS2,CDK1,CDC6,PCNA,CDK2
GO: Biological Process	GO:0000819	sister chromatid segregation			1.007e-30	5.008e-27	3.13e-28	2.845e-27	41	201	NUSAP1,KIF18A,PTTG1,CENPE,CENPF,DLGAP5,KIF4A,TRIP13,TTK,SPDL1,NEK2,PTTG3P,NCAPG,FBXO5,NDC80,BUB1,BUB1B,FEN1,NCAPD2,KIF14,DSCC1,PSRC1,KIFC1,KIF2C,KIF23,SMC4,BIRC5,PRC1,NCAPH,CDCA8,SPAG5,ZWINT,CCNB1,CEP55,RACGAP1,CDC6,CDC20,KIF18B,TOP2A,MAD2L1,AURKB
GO: Biological Process	GO:0006259	DNA metabolic process			1.45e-30	7.211e-27	4.242e-28	3.856e-27	85	1080	PTTG1,BRIP1,CENPF,PCLAF,ORC6,DACH1,BARD1,NASP,MCM2,HMGB2,MCM3,HMGB3,MCM4,MCM6,MCM7,ACTL6A,CHEK1,EYA1,MCM10,RRM1,RRM2,EZH2,TRIP13,GINS1,CDC7,CDC45,BLM,TYMS,H2AW,NEK2,AUNIP,FBXO5,BRCA1,DBF4,RAD54B,FEN1,UNG,TIMELESS,NME1,DSCC1,PARPBP,DNA2,DNMT3A,RAD51,FOXM1,TCF3,RNASEH2A,RBBP4,NSD2,POLE2,MIS18A,DTL,WT1,SMC4,APEX1,FANCL,MSH2,RFC3,RFC4,GMNN,APOBEC3B,E2F8,CCNA2,CCNE1,RAD51AP1,MSH6,HMGA2,WDHD1,CCNE2,FAN…
GO: Biological Process	GO:0098813	nuclear chromosome segregation			5.176e-30	2.575e-26	1.43e-27	1.3e-26	46	280	NUSAP1,KIF18A,PTTG1,BRIP1,CENPE,CENPF,DLGAP5,KIF4A,TRIP13,TTK,SPDL1,NEK2,PTTG3P,NCAPG,FBXO5,NDC80,BUB1,BUB1B,FEN1,NCAPD2,KIF14,DSCC1,PSRC1,KIFC1,KIF2C,KIF23,SMC4,BIRC5,PRC1,NCAPH,ECT2,CDCA8,SPAG5,ZWINT,CCNB1,CEP55,CENPQ,CCNE1,CCNE2,RACGAP1,CDC6,CDC20,KIF18B,TOP2A,MAD2L1,AURKB
GO: Biological Process	GO:0007346	regulation of mitotic cell cycle			2.169e-28	1.079e-24	5.679e-26	5.162e-25	67	713	NUSAP1,KNTC1,PTTG1,CENPE,CENPF,DLGAP5,BRINP1,CEP76,CHEK1,HMMR,EZH2,TRIP13,TTK,SPDL1,CDC7,CDC45,BLM,AURKA,CKS1B,CKS2,NEK2,PTTG3P,FBXO5,BRCA1,NDC80,DBF4,BUB1,BUB1B,MKI67,KIF14,PRMT1,FGF8,PCBP4,PSRC1,FOXC1,KIF11,RANBP1,TCF3,RAE1,FZD3,UBE2C,DTL,APEX1,BIRC5,MSH2,STIL,E2F8,EDN3,ZWINT,CCNB1,CCNE1,HMGA2,LMNB1,ASNS,TPX2,CDK1,PRKDC,CDC6,CDC20,CDC25A,CDC25C,PLK4,TOP2A,MAD2L1,PCNA,CDK2,AURKB
GO: Biological Process	GO:0010564	regulation of cell cycle process			4.599e-28	2.288e-24	1.144e-25	1.04e-24	72	839	NUSAP1,KNTC1,PTTG1,CENPE,CENPF,DLGAP5,DACH1,CEP76,CHEK1,HMMR,RRM2,EZH2,TRIP13,TTK,SPDL1,CDC7,CDC45,BLM,AURKA,NEK2,PTTG3P,CDK5R1,FBXO5,BRCA1,NDC80,DBF4,BUB1,BUB1B,FEN1,MKI67,KIF14,PRMT1,FGF8,PCBP4,PSRC1,KIF11,RAD51,FOXM1,RANBP1,TCF3,KIF23,RAE1,RBBP4,UBE2C,DTL,APEX1,BIRC5,STIL,PRC1,ECT2,E2F8,EDN3,SPAG5,CCNB1,KIF20A,CCNE1,MSH6,HMGA2,LMNB1,TPX2,RACGAP1,CDK1,PRKDC,CDC6,CDC20,CDC25A,CDC25C,PLK4,MAD2L1,…
GO: Biological Process	GO:0071897	DNA biosynthetic process			1.479e-27	7.358e-24	3.504e-25	3.185e-24	54	461	BRIP1,CENPF,PCLAF,ORC6,DACH1,BARD1,NASP,MCM2,MCM3,MCM4,MCM6,MCM7,CHEK1,MCM10,RRM1,RRM2,GINS1,CDC7,CDC45,BLM,TYMS,NEK2,FBXO5,BRCA1,DBF4,FEN1,TIMELESS,DSCC1,DNA2,RAD51,RNASEH2A,RBBP4,POLE2,DTL,RFC3,RFC4,GMNN,E2F8,CCNA2,CCNE1,MSH6,HMGA2,WDHD1,CCNE2,PRIM1,PRIM2,EXO1,GINS2,CDK1,CDC6,TOP2A,PCNA,CDK2,AURKB
GO: Biological Process	GO:0006261	DNA-dependent DNA replication			1.895e-26	9.425e-23	4.284e-24	3.894e-23	34	158	ORC6,DACH1,MCM2,MCM3,MCM4,MCM6,MCM7,MCM10,GINS1,CDC7,CDC45,BLM,FBXO5,DBF4,FEN1,TIMELESS,DSCC1,DNA2,RAD51,POLE2,RFC3,RFC4,GMNN,E2F8,CCNE1,MSH6,WDHD1,CCNE2,PRIM1,PRIM2,GINS2,CDC6,PCNA,CDK2
GO: Biological Process	GO:0000075	cell cycle checkpoint			7.186e-26	3.575e-22	1.554e-23	1.413e-22	39	233	KNTC1,SOX11,BRIP1,CENPE,CENPF,CHEK1,TRIP13,TTK,SPDL1,CDC45,BLM,AURKA,BRCA1,NDC80,BUB1,BUB1B,PRMT1,TIMELESS,DNA2,PCBP4,DTL,BIRC5,MSH2,STIL,E2F8,ZWINT,CCNB1,HMGA2,H2AX,CDK1,PRKDC,CDC6,CDC20,CDC25C,TOP2A,MAD2L1,PCNA,CDK2,AURKB
GO: Biological Process	GO:0000082	G1/S transition of mitotic cell cycle			1.278e-24	6.355e-21	2.648e-22	2.407e-21	42	300	CDKN3,ORC6,NASP,MCM2,MCM3,MCM4,MCM6,MCM7,MCM10,RRM2,EZH2,CDC7,CDC45,TYMS,AURKA,FBXO5,DBF4,DHFR,KIF14,PRMT1,PCBP4,TCF3,POLE2,APEX1,E2F5,PPAT,SKP2,GMNN,E2F8,CCNB1,CCNE1,CCNE2,PRIM1,PRIM2,CDK1,PRKDC,CDC6,CDC25A,CDC25C,PCNA,CDK2,MYB
GO: Biological Process	GO:0044843	cell cycle G1/S phase transition			2.393e-24	1.19e-20	4.76e-22	4.327e-21	43	322	CDKN3,ORC6,NASP,MCM2,MCM3,MCM4,MCM6,MCM7,MCM10,RRM2,EZH2,CDC7,CDC45,TYMS,AURKA,FBXO5,DBF4,DHFR,KIF14,PRMT1,PCBP4,TCF3,POLE2,APEX1,E2F5,PPAT,SKP2,GMNN,E2F8,CCNA2,CCNB1,CCNE1,CCNE2,PRIM1,PRIM2,CDK1,PRKDC,CDC6,CDC25A,CDC25C,PCNA,CDK2,MYB
GO: Biological Process	GO:0045787	positive regulation of cell cycle			1.033e-23	5.138e-20	1.976e-21	1.796e-20	48	428	NUSAP1,CENPE,DLGAP5,CHEK1,EZH2,CDC7,CDC45,AURKA,CKS1B,CKS2,CDK5R1,FBXO5,BRCA1,NDC80,DBF4,FEN1,KIF14,PRMT1,FGF8,PCBP4,PSRC1,RANBP1,TCF3,KIF23,UBE2C,DTL,APEX1,BIRC5,STIL,ECT2,E2F8,EDN3,SPAG5,CCNB1,CCNE1,HMGA2,LMNB1,ASNS,RACGAP1,CDK1,CDC6,CDC25A,CDC25C,PLK4,MAD2L1,PCNA,CDK2,AURKB
GO: Biological Process	GO:0009790	embryo development			3.467e-23	1.724e-19	6.387e-21	5.805e-20	81	1262	MYCN,SOX11,TGIF2,ATP8A2,NASP,TUBB2B,DLK1,ACTL6A,CHEK1,EYA1,DBN1,BCOR,GINS1,HOXA1,MEOX1,HOXA2,HOXA5,HOXA6,FZD7,HOXA7,HOXA10,HOXA11,CKS1B,CKS2,NEK2,CDK5R1,HOXB9,HOXC4,HOXC6,SALL2,SALL1,GPC3,HOXD1,BRCA1,HOXD4,HOXD10,HOXD11,PGAP1,PRMT1,FGF8,TIMELESS,FOXC1,DNMT3A,COL2A1,TCF3,CHRNA9,FZD3,SOBP,WT1,CENPU,ITGA8,BIRC5,CITED1,CHD7,MSH2,STIL,SIX1,CRABP2,E2F8,CCNB1,HMGA2,TENM4,HEY1,CCNB2,DLL3,VASH2,CXXC4,LRP4…
GO: Biological Process	GO:0071103	DNA conformation change			1.025e-22	5.098e-19	1.821e-20	1.655e-19	42	335	NUSAP1,BRIP1,CENPN,CENPA,HJURP,NASP,MCM2,OIP5,HMGB2,MCM3,SRPK1,HMGB3,MCM4,MCM6,MCM7,GINS1,CDC45,BLM,NCAPG,RAD54B,NCAPD2,MACROH2A2,DSCC1,DNA2,RAD51,RBBP4,MIS18A,CENPU,SMC4,CHD7,RFC3,RFC4,NCAPH,CCNB1,CENPQ,HMGA2,H2AX,SMARCC1,GINS2,CDK1,TOP2A,HELLS
GO: Biological Process	GO:0090068	positive regulation of cell cycle process			1.667e-22	8.292e-19	2.859e-20	2.599e-19	41	321	NUSAP1,CENPE,DLGAP5,EZH2,CDC7,CDC45,AURKA,CDK5R1,FBXO5,BRCA1,NDC80,DBF4,FEN1,KIF14,PRMT1,FGF8,PCBP4,RANBP1,KIF23,UBE2C,DTL,APEX1,BIRC5,ECT2,E2F8,EDN3,SPAG5,CCNB1,CCNE1,HMGA2,LMNB1,RACGAP1,CDK1,CDC6,CDC25A,CDC25C,PLK4,MAD2L1,PCNA,CDK2,AURKB
GO: Biological Process	GO:0044786	cell cycle DNA replication			2.117e-22	1.053e-18	3.51e-20	3.19e-19	23	73	DACH1,MCM2,MCM3,MCM4,MCM6,MCM7,GINS1,CDC7,CDC45,FBXO5,DBF4,FEN1,DNA2,RAD51,POLE2,RFC3,RFC4,GMNN,E2F8,MSH6,PRIM1,PRIM2,PCNA
GO: Biological Process	GO:0007093	mitotic cell cycle checkpoint			3.687e-22	1.834e-18	5.917e-20	5.378e-19	32	181	KNTC1,CENPE,CENPF,CHEK1,TRIP13,TTK,SPDL1,BLM,AURKA,BRCA1,NDC80,BUB1,BUB1B,PRMT1,PCBP4,BIRC5,MSH2,STIL,E2F8,ZWINT,CCNB1,HMGA2,CDK1,PRKDC,CDC6,CDC20,CDC25C,TOP2A,MAD2L1,PCNA,CDK2,AURKB
GO: Biological Process	GO:0045786	negative regulation of cell cycle			8.405e-22	4.181e-18	1.306e-19	1.187e-18	57	677	KNTC1,SOX11,CDKN3,PTTG1,BRIP1,CENPE,CENPF,BARD1,BRINP1,CHEK1,RRM2,EZH2,TRIP13,TTK,SPDL1,CDC7,CDC45,BLM,AURKA,NEK2,PTTG3P,CDK5R1,FBXO5,BRCA1,NDC80,BUB1,BUB1B,PRMT1,TIMELESS,DNA2,PCBP4,FOXC1,RAD51,FOXM1,FZD3,RBBP4,DTL,BIRC5,MSH2,STIL,GMNN,E2F8,ZWINT,CCNB1,MSH6,HMGA2,H2AX,CDK1,PRKDC,CDC6,CDC20,CDC25C,TOP2A,MAD2L1,PCNA,CDK2,AURKB
GO: Biological Process	GO:0006281	DNA repair			1.079e-21	5.368e-18	1.627e-19	1.479e-18	52	564	PTTG1,BRIP1,PCLAF,BARD1,MCM2,HMGB2,MCM3,MCM4,MCM6,MCM7,ACTL6A,CHEK1,EYA1,TRIP13,CDC7,CDC45,BLM,H2AW,AUNIP,BRCA1,RAD54B,FEN1,UNG,TIMELESS,PARPBP,DNA2,RAD51,FOXM1,RNASEH2A,NSD2,POLE2,DTL,SMC4,APEX1,FANCL,MSH2,RFC3,RFC4,RAD51AP1,MSH6,HMGA2,WDHD1,FANCI,EXO1,H2AX,GINS2,NEIL3,CDK1,PRKDC,KDM1A,PCNA,CDK2
GO: Biological Process	GO:1901990	regulation of mitotic cell cycle phase transition			4.009e-21	1.994e-17	5.865e-19	5.331e-18	47	470	KNTC1,CENPE,CENPF,DLGAP5,CEP76,CHEK1,HMMR,EZH2,TRIP13,TTK,SPDL1,CDC7,CDC45,BLM,AURKA,NEK2,FBXO5,BRCA1,NDC80,DBF4,BUB1,BUB1B,KIF14,PRMT1,PCBP4,TCF3,UBE2C,DTL,APEX1,BIRC5,E2F8,CCNB1,CCNE1,HMGA2,LMNB1,TPX2,CDK1,PRKDC,CDC6,CDC20,CDC25A,CDC25C,PLK4,MAD2L1,PCNA,CDK2,AURKB
GO: Biological Process	GO:0006974	cellular response to DNA damage stimulus			2.821e-20	1.403e-16	4.009e-18	3.644e-17	63	884	CDKN3,PTTG1,BRIP1,PCLAF,BARD1,MCM2,HMGB2,MCM3,MCM4,HIC2,MCM6,MCM7,ACTL6A,CHEK1,EYA1,MCM10,TRIP13,CDC7,CDC45,BLM,AURKA,H2AW,AUNIP,FBXO5,BRCA1,RAD54B,FEN1,PRMT1,UNG,TIMELESS,PARPBP,DNA2,PCBP4,RAD51,FOXM1,RNASEH2A,NSD2,POLE2,DTL,SMC4,APEX1,FANCL,MSH2,RFC3,RFC4,E2F8,CCNB1,RAD51AP1,MSH6,HMGA2,WDHD1,FANCI,EXO1,H2AX,GINS2,NEIL3,CDK1,PRKDC,CDC25C,TOP2A,KDM1A,PCNA,CDK2
GO: Biological Process	GO:0051983	regulation of chromosome segregation			4.663e-20	2.319e-16	6.442e-18	5.855e-17	25	113	PTTG1,CENPE,CENPF,DLGAP5,TRIP13,TTK,SPDL1,NEK2,PTTG3P,FBXO5,NDC80,BUB1,BUB1B,FEN1,MKI67,KIF2C,BIRC5,ECT2,SPAG5,CCNB1,RACGAP1,CDC6,CDC20,MAD2L1,AURKB
GO: Biological Process	GO:0033260	nuclear DNA replication			7.146e-20	3.554e-16	9.606e-18	8.731e-17	20	62	DACH1,MCM2,MCM3,MCM4,MCM6,MCM7,GINS1,CDC7,CDC45,DBF4,FEN1,DNA2,RAD51,POLE2,RFC3,RFC4,GMNN,PRIM1,PRIM2,PCNA
GO: Biological Process	GO:0007088	regulation of mitotic nuclear division			8.536e-20	4.246e-16	1.117e-17	1.016e-16	30	184	NUSAP1,KNTC1,PTTG1,CENPE,CENPF,DLGAP5,CHEK1,TRIP13,TTK,SPDL1,AURKA,NEK2,PTTG3P,FBXO5,NDC80,BUB1,BUB1B,MKI67,FGF8,KIF11,RANBP1,UBE2C,BIRC5,EDN3,CCNB1,CDC6,CDC20,CDC25C,MAD2L1,AURKB
GO: Biological Process	GO:1901987	regulation of cell cycle phase transition			9.963e-20	4.956e-16	1.271e-17	1.155e-16	47	508	KNTC1,CENPE,CENPF,DLGAP5,CEP76,CHEK1,HMMR,EZH2,TRIP13,TTK,SPDL1,CDC7,CDC45,BLM,AURKA,NEK2,FBXO5,BRCA1,NDC80,DBF4,BUB1,BUB1B,KIF14,PRMT1,PCBP4,TCF3,UBE2C,DTL,APEX1,BIRC5,E2F8,CCNB1,CCNE1,HMGA2,LMNB1,TPX2,CDK1,PRKDC,CDC6,CDC20,CDC25A,CDC25C,PLK4,MAD2L1,PCNA,CDK2,AURKB
GO: Biological Process	GO:0045930	negative regulation of mitotic cell cycle			6.34e-19	3.153e-15	7.884e-17	7.166e-16	39	359	KNTC1,PTTG1,CENPE,CENPF,BRINP1,CHEK1,EZH2,TRIP13,TTK,SPDL1,BLM,AURKA,PTTG3P,FBXO5,BRCA1,NDC80,BUB1,BUB1B,PRMT1,PCBP4,FOXC1,FZD3,BIRC5,MSH2,STIL,E2F8,ZWINT,CCNB1,HMGA2,CDK1,PRKDC,CDC6,CDC20,CDC25C,TOP2A,MAD2L1,PCNA,CDK2,AURKB
GO: Biological Process	GO:0006270	DNA replication initiation			8e-19	3.979e-15	9.705e-17	8.821e-16	18	51	ORC6,MCM2,MCM3,MCM4,MCM6,MCM7,MCM10,CDC45,FBXO5,POLE2,E2F8,CCNE1,MSH6,CCNE2,PRIM1,PRIM2,CDC6,CDK2
GO: Biological Process	GO:1902850	microtubule cytoskeleton organization involved in mitosis			8.878e-19	4.416e-15	1.051e-16	9.557e-16	26	140	NUSAP1,CENPA,CENPE,SPC25,KIF4A,EYA1,TTK,SPDL1,AURKA,NEK2,NDC80,PSRC1,KIF11,KIFC1,KIF23,RAE1,BIRC5,STMN1,STIL,PRC1,CCNB1,TPX2,RACGAP1,CDC20,MAD2L1,AURKB
GO: Biological Process	GO:0051783	regulation of nuclear division			6.042e-18	3.005e-14	6.989e-16	6.353e-15	30	213	NUSAP1,KNTC1,PTTG1,CENPE,CENPF,DLGAP5,CHEK1,TRIP13,TTK,SPDL1,AURKA,NEK2,PTTG3P,FBXO5,NDC80,BUB1,BUB1B,MKI67,FGF8,KIF11,RANBP1,UBE2C,BIRC5,EDN3,CCNB1,CDC6,CDC20,CDC25C,MAD2L1,AURKB
GO: Biological Process	GO:0006310	DNA recombination			5.123e-17	2.548e-13	5.714e-15	5.194e-14	34	304	BRIP1,MCM2,HMGB2,MCM3,HMGB3,MCM4,MCM6,MCM7,ACTL6A,CHEK1,TRIP13,CDC7,CDC45,BLM,AUNIP,BRCA1,RAD54B,FEN1,UNG,TIMELESS,PARPBP,RAD51,TCF3,NSD2,APEX1,MSH2,RAD51AP1,MSH6,EXO1,H2AX,GINS2,PRKDC,TOP2A,KDM1A
GO: Biological Process	GO:0010948	negative regulation of cell cycle process			5.17e-17	2.571e-13	5.714e-15	5.194e-14	38	386	PTTG1,CENPE,CENPF,CHEK1,RRM2,EZH2,TRIP13,TTK,SPDL1,CDC7,BLM,AURKA,NEK2,PTTG3P,FBXO5,BRCA1,NDC80,BUB1,BUB1B,PRMT1,PCBP4,RAD51,RBBP4,DTL,BIRC5,E2F8,CCNB1,MSH6,HMGA2,CDK1,PRKDC,CDC6,CDC20,CDC25C,MAD2L1,PCNA,CDK2,AURKB
GO: Biological Process	GO:0010965	regulation of mitotic sister chromatid separation			6.053e-17	3.011e-13	6.546e-15	5.949e-14	18	63	PTTG1,CENPE,CENPF,DLGAP5,TRIP13,TTK,SPDL1,PTTG3P,FBXO5,NDC80,BUB1,BUB1B,BIRC5,CCNB1,CDC6,CDC20,MAD2L1,AURKB
GO: Biological Process	GO:2000816	negative regulation of mitotic sister chromatid separation			6.227e-17	3.097e-13	6.59e-15	5.99e-14	16	45	PTTG1,CENPE,CENPF,TRIP13,TTK,SPDL1,PTTG3P,FBXO5,NDC80,BUB1,BUB1B,BIRC5,CCNB1,CDC20,MAD2L1,AURKB
GO: Biological Process	GO:0051304	chromosome separation			9.629e-17	4.789e-13	9.978e-15	9.069e-14	21	98	PTTG1,CENPE,CENPF,DLGAP5,TRIP13,TTK,SPDL1,PTTG3P,FBXO5,NDC80,BUB1,BUB1B,NCAPD2,BIRC5,NCAPH,CCNB1,CDC6,CDC20,TOP2A,MAD2L1,AURKB
GO: Biological Process	GO:0022414	reproductive process			1.346e-16	6.693e-13	1.366e-14	1.242e-13	82	1652	KIF18A,KDM5B,PTTG1,BRIP1,CLGN,PATZ1,PEG10,DACH1,NASP,ETV5,HMGB2,SRPK1,BRINP1,MDK,RRM1,RPL39L,TRIP13,TTK,SEPTIN6,AURKA,HOXA10,HOXA11,CKS2,NEK2,PTTG3P,NELL2,HOXC4,CADM1,SALL1,FBXO5,HOXD10,HOXD11,BUB1,RAD54B,BUB1B,NCAPD2,MKI67,ASPM,PLAG1,FGF8,HSF2,FOXC1,KIFC1,DNMT3A,RAD51,IFT81,WT1,SMC4,FANCL,CITED1,CHD7,MSH2,PPAT,NCAPH,SUV39H2,E2F8,CCNB1,CCNE1,MSH6,HMGA2,ADGRG2,HEY1,CCNE2,PAFAH1B3,VASH2,EXO1,H2AX,T…
GO: Biological Process	GO:1905819	negative regulation of chromosome separation			1.399e-16	6.96e-13	1.392e-14	1.265e-13	16	47	PTTG1,CENPE,CENPF,TRIP13,TTK,SPDL1,PTTG3P,FBXO5,NDC80,BUB1,BUB1B,BIRC5,CCNB1,CDC20,MAD2L1,AURKB
GO: Biological Process	GO:0000003	reproduction			1.495e-16	7.437e-13	1.4e-14	1.273e-13	82	1655	KIF18A,KDM5B,PTTG1,BRIP1,CLGN,PATZ1,PEG10,DACH1,NASP,ETV5,HMGB2,SRPK1,BRINP1,MDK,RRM1,RPL39L,TRIP13,TTK,SEPTIN6,AURKA,HOXA10,HOXA11,CKS2,NEK2,PTTG3P,NELL2,HOXC4,CADM1,SALL1,FBXO5,HOXD10,HOXD11,BUB1,RAD54B,BUB1B,NCAPD2,MKI67,ASPM,PLAG1,FGF8,HSF2,FOXC1,KIFC1,DNMT3A,RAD51,IFT81,WT1,SMC4,FANCL,CITED1,CHD7,MSH2,PPAT,NCAPH,SUV39H2,E2F8,CCNB1,CCNE1,MSH6,HMGA2,ADGRG2,HEY1,CCNE2,PAFAH1B3,VASH2,EXO1,H2AX,T…
GO: Biological Process	GO:0051306	mitotic sister chromatid separation			1.522e-16	7.57e-13	1.4e-14	1.273e-13	18	66	PTTG1,CENPE,CENPF,DLGAP5,TRIP13,TTK,SPDL1,PTTG3P,FBXO5,NDC80,BUB1,BUB1B,BIRC5,CCNB1,CDC6,CDC20,MAD2L1,AURKB
GO: Biological Process	GO:0051321	meiotic cell cycle			1.548e-16	7.701e-13	1.4e-14	1.273e-13	32	276	KIF18A,PTTG1,BRIP1,CLGN,TRIP13,TTK,AURKA,CKS2,NEK2,PTTG3P,FBXO5,BUB1,RAD54B,BUB1B,NCAPD2,MKI67,ASPM,RAD51,SMC4,NCAPH,SUV39H2,CCNE1,MSH6,HMGA2,CCNE2,EXO1,H2AX,CDC20,CDC25A,CDC25C,TOP2A,CDK2
GO: Biological Process	GO:0140013	meiotic nuclear division			1.548e-16	7.701e-13	1.4e-14	1.273e-13	32	276	KIF18A,PTTG1,BRIP1,CLGN,TRIP13,TTK,AURKA,CKS2,NEK2,PTTG3P,FBXO5,BUB1,RAD54B,BUB1B,NCAPD2,MKI67,ASPM,RAD51,SMC4,NCAPH,SUV39H2,CCNE1,MSH6,HMGA2,CCNE2,EXO1,H2AX,CDC20,CDC25A,CDC25C,TOP2A,CDK2
GO: Biological Process	GO:1903046	meiotic cell cycle process			1.548e-16	7.701e-13	1.4e-14	1.273e-13	32	276	KIF18A,PTTG1,BRIP1,CLGN,TRIP13,TTK,AURKA,CKS2,NEK2,PTTG3P,FBXO5,BUB1,RAD54B,BUB1B,NCAPD2,MKI67,ASPM,RAD51,SMC4,NCAPH,SUV39H2,CCNE1,MSH6,HMGA2,CCNE2,EXO1,H2AX,CDC20,CDC25A,CDC25C,TOP2A,CDK2
GO: Biological Process	GO:0033048	negative regulation of mitotic sister chromatid segregation			2.064e-16	1.026e-12	1.833e-14	1.666e-13	16	48	PTTG1,CENPE,CENPF,TRIP13,TTK,SPDL1,PTTG3P,FBXO5,NDC80,BUB1,BUB1B,BIRC5,CCNB1,CDC20,MAD2L1,AURKB
GO: Biological Process	GO:1905818	regulation of chromosome separation			3.639e-16	1.81e-12	3.175e-14	2.886e-13	18	69	PTTG1,CENPE,CENPF,DLGAP5,TRIP13,TTK,SPDL1,PTTG3P,FBXO5,NDC80,BUB1,BUB1B,BIRC5,CCNB1,CDC6,CDC20,MAD2L1,AURKB
GO: Biological Process	GO:0007051	spindle organization			5.083e-16	2.528e-12	4.359e-14	3.962e-13	27	196	CENPE,SPC25,KIF4A,TTK,AURKA,NEK2,AUNIP,FBXO5,NDC80,ASPM,SAC3D1,PSRC1,KIF11,KIFC1,RANBP1,KIF23,RAE1,BIRC5,STMN1,STIL,PRC1,SPAG5,CCNB1,TPX2,RACGAP1,CDC20,AURKB
GO: Biological Process	GO:0006302	double-strand break repair			6.143e-16	3.056e-12	5.173e-14	4.702e-13	30	251	BRIP1,BARD1,MCM2,MCM3,MCM4,MCM6,MCM7,CHEK1,EYA1,TRIP13,CDC7,CDC45,BLM,AUNIP,BRCA1,RAD54B,FEN1,TIMELESS,PARPBP,DNA2,RAD51,FOXM1,NSD2,MSH2,RAD51AP1,HMGA2,H2AX,GINS2,PRKDC,KDM1A
GO: Biological Process	GO:0033046	negative regulation of sister chromatid segregation			6.24e-16	3.104e-12	5.173e-14	4.702e-13	16	51	PTTG1,CENPE,CENPF,TRIP13,TTK,SPDL1,PTTG3P,FBXO5,NDC80,BUB1,BUB1B,BIRC5,CCNB1,CDC20,MAD2L1,AURKB
GO: Biological Process	GO:0045839	negative regulation of mitotic nuclear division			7.162e-16	3.563e-12	5.84e-14	5.308e-13	17	61	PTTG1,CENPE,CENPF,CHEK1,TRIP13,TTK,SPDL1,PTTG3P,FBXO5,NDC80,BUB1,BUB1B,BIRC5,CCNB1,CDC20,MAD2L1,AURKB
GO: Biological Process	GO:0009792	embryo development ending in birth or egg hatching			8.856e-16	4.405e-12	7.105e-14	6.458e-13	54	828	MYCN,SOX11,NASP,DLK1,ACTL6A,CHEK1,EYA1,DBN1,BCOR,GINS1,HOXA1,MEOX1,HOXA2,HOXA5,HOXA6,HOXA7,HOXA11,NEK2,CDK5R1,HOXB9,HOXC4,HOXC6,SALL2,SALL1,HOXD1,BRCA1,HOXD4,HOXD10,HOXD11,PRMT1,FGF8,FOXC1,COL2A1,FZD3,CENPU,CITED1,CHD7,MSH2,STIL,SIX1,E2F8,CCNB1,HEY1,CCNB2,DLL3,VASH2,PAX2,PRKDC,FZD2,TMEM100,PLK4,SIX2,KDM1A,MYB
GO: Biological Process	GO:0043009	chordate embryonic development			1.14e-15	5.672e-12	9.003e-14	8.183e-13	53	805	MYCN,SOX11,NASP,DLK1,ACTL6A,CHEK1,EYA1,DBN1,BCOR,GINS1,HOXA1,MEOX1,HOXA2,HOXA5,HOXA6,HOXA7,HOXA11,NEK2,HOXB9,HOXC4,HOXC6,SALL2,SALL1,HOXD1,BRCA1,HOXD4,HOXD10,HOXD11,PRMT1,FGF8,FOXC1,COL2A1,FZD3,CENPU,CITED1,CHD7,MSH2,STIL,SIX1,E2F8,CCNB1,HEY1,CCNB2,DLL3,VASH2,PAX2,PRKDC,FZD2,TMEM100,PLK4,SIX2,KDM1A,MYB
GO: Biological Process	GO:0031577	spindle checkpoint			1.236e-15	6.145e-12	9.602e-14	8.728e-13	15	44	CENPE,CENPF,TRIP13,TTK,SPDL1,AURKA,NDC80,BUB1,BUB1B,BIRC5,STIL,CCNB1,CDC20,MAD2L1,AURKB
GO: Biological Process	GO:0033047	regulation of mitotic sister chromatid segregation			1.41e-15	7.011e-12	1.079e-13	9.804e-13	18	74	PTTG1,CENPE,CENPF,DLGAP5,TRIP13,TTK,SPDL1,PTTG3P,FBXO5,NDC80,BUB1,BUB1B,BIRC5,CCNB1,CDC6,CDC20,MAD2L1,AURKB
GO: Biological Process	GO:0006325	chromatin organization			1.707e-15	8.489e-12	1.286e-13	1.169e-12	54	841	KDM5B,CENPN,CENPA,HJURP,NASP,MCM2,OIP5,HMGB2,SRPK1,HMGB3,ACTL6A,CHEK1,EYA1,BCOR,EZH2,NPM3,CDC45,AURKA,JARID2,H2AW,BRCA1,MKI67,ANP32E,PRMT1,MACROH2A2,TAF5,DNMT3A,TCF3,VRK1,RBBP4,NSD2,MIS18A,CENPU,CHD7,ATAD2,SUV39H2,CCNA2,CCNB1,CENPQ,YEATS4,HMGA2,WDHD1,AUTS2,H2AX,H2AZ1,SMARCC1,CDK1,TCF7L1,KDM1A,CDK2,HDAC2,MYB,AURKB,HELLS
GO: Biological Process	GO:0051985	negative regulation of chromosome segregation			1.744e-15	8.673e-12	1.294e-13	1.177e-12	16	54	PTTG1,CENPE,CENPF,TRIP13,TTK,SPDL1,PTTG3P,FBXO5,NDC80,BUB1,BUB1B,BIRC5,CCNB1,CDC20,MAD2L1,AURKB
GO: Biological Process	GO:0007052	mitotic spindle organization			2.062e-15	1.025e-11	1.508e-13	1.371e-12	21	113	CENPE,SPC25,KIF4A,TTK,AURKA,NEK2,NDC80,PSRC1,KIF11,KIFC1,KIF23,RAE1,BIRC5,STMN1,STIL,PRC1,CCNB1,TPX2,RACGAP1,CDC20,AURKB
GO: Biological Process	GO:0033045	regulation of sister chromatid segregation			3.08e-15	1.532e-11	2.22e-13	2.018e-12	19	89	PTTG1,CENPE,CENPF,DLGAP5,TRIP13,TTK,SPDL1,PTTG3P,FBXO5,NDC80,BUB1,BUB1B,FEN1,BIRC5,CCNB1,CDC6,CDC20,MAD2L1,AURKB
GO: Biological Process	GO:0030071	regulation of mitotic metaphase/anaphase transition			3.328e-15	1.655e-11	2.365e-13	2.149e-12	16	56	CENPE,CENPF,DLGAP5,TRIP13,TTK,SPDL1,FBXO5,NDC80,BUB1,BUB1B,BIRC5,CCNB1,CDC6,CDC20,MAD2L1,AURKB
GO: Biological Process	GO:0048699	generation of neurons			3.758e-15	1.869e-11	2.632e-13	2.393e-12	82	1751	MYCN,SOX11,DLG5,TGIF2,MAP2,ATP8A2,ETV1,ETV4,ETV5,HMGB2,NCAM1,TUBB2B,BRINP1,EYA1,DBN1,MDK,EZH2,CHN1,NREP,GFRA1,MEIS1,HOXA1,HOXA2,FZD7,AURKA,CDK5R1,SALL1,HOXD1,PTPRG,NRXN1,HOXD10,UCHL1,DHFR,ASPM,SYT1,PLAG1,PRMT1,FGF8,ITM2C,NNAT,NME1,WASF1,NPY,FOXD1,DNMT3A,RANBP1,TCF3,NPTX2,NRTN,FZD3,PPP1R9A,SH3GL3,ENC1,DPYSL4,CHD7,STMN1,INPP5F,SIX1,CRABP2,ECT2,EDN3,EFNA4,HMGA2,TENM4,TIAM1,HEY1,SLIT1,UNC5C,DLL3,AUTS…
GO: Biological Process	GO:1902099	regulation of metaphase/anaphase transition of cell cycle			8.331e-15	4.144e-11	5.756e-13	5.231e-12	16	59	CENPE,CENPF,DLGAP5,TRIP13,TTK,SPDL1,FBXO5,NDC80,BUB1,BUB1B,BIRC5,CCNB1,CDC6,CDC20,MAD2L1,AURKB
GO: Biological Process	GO:0045931	positive regulation of mitotic cell cycle			8.794e-15	4.374e-11	5.929e-13	5.389e-12	25	184	NUSAP1,CENPE,DLGAP5,CDC7,CDC45,AURKA,FBXO5,NDC80,DBF4,FGF8,RANBP1,UBE2C,DTL,APEX1,BIRC5,EDN3,CCNB1,CCNE1,LMNB1,ASNS,CDK1,CDC6,CDC25A,CDC25C,MAD2L1
GO: Biological Process	GO:0000226	microtubule cytoskeleton organization			8.821e-15	4.387e-11	5.929e-13	5.389e-12	53	846	NUSAP1,KIF18A,CENPA,MAP2,CENPE,PCLAF,LRRC49,SPC25,KIF4A,TUBB2B,CEP76,CHEK1,EYA1,TTK,SEPTIN6,SPDL1,AURKA,NEK2,CDK5R1,AUNIP,FBXO5,BRCA1,NDC80,ASPM,KIF14,SAC3D1,PSRC1,KIF11,KIFC1,KIF2C,RANBP1,KIF23,RAE1,IFT81,BIRC5,STMN1,STIL,PRC1,SPAG5,CCNB1,KIF20A,TBC1D8,DNAAF2,TPX2,RACGAP1,CDK1,CKAP2,CDC20,KIF18B,PLK4,MAD2L1,CDK2,AURKB
GO: Biological Process	GO:0007091	metaphase/anaphase transition of mitotic cell cycle			1.117e-14	5.556e-11	7.408e-13	6.733e-12	16	60	CENPE,CENPF,DLGAP5,TRIP13,TTK,SPDL1,FBXO5,NDC80,BUB1,BUB1B,BIRC5,CCNB1,CDC6,CDC20,MAD2L1,AURKB
GO: Biological Process	GO:0051784	negative regulation of nuclear division			1.166e-14	5.8e-11	7.632e-13	6.937e-12	17	71	PTTG1,CENPE,CENPF,CHEK1,TRIP13,TTK,SPDL1,PTTG3P,FBXO5,NDC80,BUB1,BUB1B,BIRC5,CCNB1,CDC20,MAD2L1,AURKB
GO: Biological Process	GO:0000086	G2/M transition of mitotic cell cycle			1.192e-14	5.931e-11	7.702e-13	7.001e-12	29	260	CENPF,CEP76,CHEK1,HMMR,MELK,CDC7,BLM,AURKA,NEK2,FBXO5,BRCA1,KIF14,FOXM1,DTL,BIRC5,SKP2,CCNA2,CCNB1,HMGA2,LMNB1,CCNB2,TPX2,CDK1,CDC6,CDC25A,CDC25C,PLK4,CDK2,AURKB
GO: Biological Process	GO:0045841	negative regulation of mitotic metaphase/anaphase transition			1.608e-14	8e-11	1.013e-12	9.204e-12	14	42	CENPE,CENPF,TRIP13,TTK,SPDL1,FBXO5,NDC80,BUB1,BUB1B,BIRC5,CCNB1,CDC20,MAD2L1,AURKB
GO: Biological Process	GO:0071174	mitotic spindle checkpoint			1.608e-14	8e-11	1.013e-12	9.204e-12	14	42	CENPE,CENPF,TRIP13,TTK,SPDL1,NDC80,BUB1,BUB1B,BIRC5,STIL,CCNB1,CDC20,MAD2L1,AURKB
GO: Biological Process	GO:1901988	negative regulation of cell cycle phase transition			1.779e-14	8.847e-11	1.093e-12	9.934e-12	30	284	CENPE,CENPF,CHEK1,EZH2,TRIP13,TTK,SPDL1,BLM,AURKA,FBXO5,BRCA1,NDC80,BUB1,BUB1B,PRMT1,PCBP4,DTL,BIRC5,E2F8,CCNB1,HMGA2,CDK1,PRKDC,CDC6,CDC20,CDC25C,MAD2L1,PCNA,CDK2,AURKB
GO: Biological Process	GO:1901991	negative regulation of mitotic cell cycle phase transition			1.78e-14	8.853e-11	1.093e-12	9.934e-12	29	264	CENPE,CENPF,CHEK1,EZH2,TRIP13,TTK,SPDL1,BLM,AURKA,FBXO5,BRCA1,NDC80,BUB1,BUB1B,PRMT1,PCBP4,BIRC5,E2F8,CCNB1,HMGA2,CDK1,PRKDC,CDC6,CDC20,CDC25C,MAD2L1,PCNA,CDK2,AURKB
GO: Biological Process	GO:0044784	metaphase/anaphase transition of cell cycle			2.6e-14	1.293e-10	1.577e-12	1.433e-11	16	63	CENPE,CENPF,DLGAP5,TRIP13,TTK,SPDL1,FBXO5,NDC80,BUB1,BUB1B,BIRC5,CCNB1,CDC6,CDC20,MAD2L1,AURKB
GO: Biological Process	GO:1902100	negative regulation of metaphase/anaphase transition of cell cycle			3.381e-14	1.682e-10	2.026e-12	1.842e-11	14	44	CENPE,CENPF,TRIP13,TTK,SPDL1,FBXO5,NDC80,BUB1,BUB1B,BIRC5,CCNB1,CDC20,MAD2L1,AURKB
GO: Biological Process	GO:0022008	neurogenesis			4.399e-14	2.188e-10	2.605e-12	2.368e-11	83	1866	MYCN,SOX11,DLG5,TGIF2,MAP2,ATP8A2,WASF3,ETV1,ETV4,ETV5,HMGB2,NCAM1,TUBB2B,BRINP1,EYA1,DBN1,MDK,EZH2,CHN1,NREP,GFRA1,MEIS1,HOXA1,HOXA2,FZD7,AURKA,CDK5R1,SALL1,HOXD1,PTPRG,NRXN1,HOXD10,UCHL1,DHFR,ASPM,SYT1,PLAG1,PRMT1,FGF8,ITM2C,NNAT,NME1,WASF1,NPY,FOXD1,DNMT3A,RANBP1,TCF3,NPTX2,NRTN,FZD3,PPP1R9A,SH3GL3,ENC1,DPYSL4,CHD7,STMN1,INPP5F,SIX1,CRABP2,ECT2,EDN3,EFNA4,HMGA2,TENM4,TIAM1,HEY1,SLIT1,UNC5C,DLL…
GO: Biological Process	GO:2001251	negative regulation of chromosome organization			4.653e-14	2.314e-10	2.723e-12	2.475e-11	23	163	PTTG1,CENPE,CENPF,MCM2,BCOR,TRIP13,TTK,SPDL1,JARID2,PTTG3P,FBXO5,BRCA1,NDC80,BUB1,BUB1B,BIRC5,ATAD2,CCNB1,CDC20,TOP2A,KDM1A,MAD2L1,AURKB
GO: Biological Process	GO:0031570	DNA integrity checkpoint			5.321e-14	2.646e-10	3.077e-12	2.797e-11	23	164	BRIP1,CHEK1,CDC45,BLM,AURKA,BRCA1,PRMT1,TIMELESS,DNA2,PCBP4,DTL,MSH2,E2F8,CCNB1,HMGA2,H2AX,CDK1,PRKDC,CDC6,CDC25C,TOP2A,PCNA,CDK2
GO: Biological Process	GO:0007017	microtubule-based process			6.526e-14	3.246e-10	3.731e-12	3.391e-11	59	1071	NUSAP1,KIF18A,CENPA,MAP2,CENPE,PCLAF,LRRC49,DLGAP5,SPC25,KIF4A,TUBB2B,CEP76,CHEK1,EYA1,TTK,SEPTIN6,SPDL1,AURKA,NEK2,CDK5R1,AUNIP,FBXO5,BRCA1,KIF15,NDC80,UCHL1,ASPM,KIF14,SAC3D1,WASF1,PSRC1,KIF11,KIFC1,KIF2C,RANBP1,KIF23,RAE1,IFT81,WT1,BIRC5,STMN1,STIL,PRC1,SPAG5,CCNB1,KIF20A,TBC1D8,DNAAF2,TPX2,TMF1,RACGAP1,CDK1,CKAP2,CDC20,KIF18B,PLK4,MAD2L1,CDK2,AURKB
GO: Biological Process	GO:0032392	DNA geometric change			7.233e-14	3.598e-10	4.088e-12	3.716e-11	20	119	BRIP1,MCM2,HMGB2,MCM3,HMGB3,MCM4,MCM6,MCM7,GINS1,CDC45,BLM,RAD54B,DSCC1,DNA2,RAD51,CHD7,RFC3,RFC4,GINS2,TOP2A
GO: Biological Process	GO:0044839	cell cycle G2/M phase transition			7.496e-14	3.728e-10	4.189e-12	3.808e-11	29	279	CENPF,CEP76,CHEK1,HMMR,MELK,CDC7,BLM,AURKA,NEK2,FBXO5,BRCA1,KIF14,FOXM1,DTL,BIRC5,SKP2,CCNA2,CCNB1,HMGA2,LMNB1,CCNB2,TPX2,CDK1,CDC6,CDC25A,CDC25C,PLK4,CDK2,AURKB
GO: Biological Process	GO:0030182	neuron differentiation			1.064e-13	5.293e-10	5.882e-12	5.346e-11	74	1578	MYCN,SOX11,DLG5,TGIF2,MAP2,ATP8A2,ETV1,ETV4,ETV5,NCAM1,TUBB2B,BRINP1,EYA1,DBN1,MDK,EZH2,CHN1,NREP,GFRA1,MEIS1,HOXA1,HOXA2,FZD7,AURKA,CDK5R1,SALL1,HOXD1,PTPRG,NRXN1,HOXD10,UCHL1,DHFR,ASPM,SYT1,PRMT1,FGF8,ITM2C,NNAT,NME1,WASF1,NPY,FOXD1,DNMT3A,RANBP1,TCF3,NPTX2,NRTN,FZD3,PPP1R9A,SH3GL3,ENC1,DPYSL4,STMN1,INPP5F,SIX1,CRABP2,ECT2,EDN3,EFNA4,TENM4,TIAM1,HEY1,SLIT1,UNC5C,AUTS2,LRP4,FZD10,ROBO1,ELAVL4,PA…
GO: Biological Process	GO:0033043	regulation of organelle organization			1.881e-13	9.358e-10	1.028e-11	9.347e-11	68	1391	NUSAP1,KNTC1,KIF18A,PTTG1,MAP2,CENPE,CENPF,LAPTM4B,DLGAP5,MCM2,CEP76,CHEK1,DBN1,BCOR,MDK,TRIP13,TTK,ADD2,SPDL1,CDC45,AURKA,JARID2,NEK2,PTTG3P,CDK5R1,FBXO5,BRCA1,NRXN1,NDC80,BUB1,BUB1B,FEN1,MKI67,SYT1,FGF8,MLLT11,WASF1,PSRC1,KIF11,RANBP1,RAE1,PPP1R9A,UBE2C,BIRC5,STMN1,STIL,ATAD2,ECT2,EDN3,SPAG5,CCNB1,TBC1D8,WDHD1,LRRTM2,TPX2,AUTS2,FZD10,CKAP2,CDC6,CDC20,CDC25C,PLK4,TOP2A,KDM1A,MAD2L1,HDAC2,MYB,AUR…
GO: Biological Process	GO:0007094	mitotic spindle assembly checkpoint			2.068e-13	1.029e-09	1.106e-11	1.005e-10	13	40	CENPE,CENPF,TRIP13,TTK,SPDL1,NDC80,BUB1,BUB1B,BIRC5,CCNB1,CDC20,MAD2L1,AURKB
GO: Biological Process	GO:0071173	spindle assembly checkpoint			2.068e-13	1.029e-09	1.106e-11	1.005e-10	13	40	CENPE,CENPF,TRIP13,TTK,SPDL1,NDC80,BUB1,BUB1B,BIRC5,CCNB1,CDC20,MAD2L1,AURKB
GO: Biological Process	GO:0033044	regulation of chromosome organization			3.132e-13	1.558e-09	1.657e-11	1.506e-10	33	384	PTTG1,CENPE,CENPF,DLGAP5,MCM2,CHEK1,BCOR,TRIP13,TTK,SPDL1,CDC45,JARID2,NEK2,PTTG3P,FBXO5,BRCA1,NDC80,BUB1,BUB1B,FEN1,MKI67,BIRC5,ATAD2,CCNB1,WDHD1,AUTS2,CDC6,CDC20,TOP2A,KDM1A,MAD2L1,MYB,AURKB
GO: Biological Process	GO:0071459	protein localization to chromosome, centromeric region			4.757e-13	2.366e-09	2.491e-11	2.264e-10	15	63	CENPN,CENPA,HJURP,NASP,OIP5,TTK,SPDL1,NDC80,BUB1B,RBBP4,MIS18A,CENPU,CENPQ,CDK1,AURKB
GO: Biological Process	GO:0006323	DNA packaging			5.014e-13	2.494e-09	2.598e-11	2.361e-10	25	219	NUSAP1,CENPN,CENPA,HJURP,NASP,MCM2,OIP5,HMGB2,SRPK1,NCAPG,NCAPD2,MACROH2A2,RBBP4,MIS18A,CENPU,SMC4,NCAPH,CCNB1,CENPQ,HMGA2,H2AX,SMARCC1,CDK1,TOP2A,HELLS
GO: Biological Process	GO:0006338	chromatin remodeling			7.209e-13	3.586e-09	3.697e-11	3.36e-10	23	185	KDM5B,CENPN,CENPA,HJURP,NASP,OIP5,HMGB2,HMGB3,ACTL6A,NPM3,JARID2,ANP32E,RBBP4,MIS18A,CENPU,CHD7,SUV39H2,CENPQ,HMGA2,SMARCC1,HDAC2,MYB,HELLS
GO: Biological Process	GO:0000724	double-strand break repair via homologous recombination			7.352e-13	3.657e-09	3.732e-11	3.392e-10	20	134	MCM2,MCM3,MCM4,MCM6,MCM7,CHEK1,CDC7,CDC45,BLM,AUNIP,BRCA1,RAD54B,FEN1,TIMELESS,PARPBP,RAD51,RAD51AP1,H2AX,GINS2,KDM1A
GO: Biological Process	GO:0000725	recombinational repair			8.486e-13	4.221e-09	4.263e-11	3.875e-10	20	135	MCM2,MCM3,MCM4,MCM6,MCM7,CHEK1,CDC7,CDC45,BLM,AUNIP,BRCA1,RAD54B,FEN1,TIMELESS,PARPBP,RAD51,RAD51AP1,H2AX,GINS2,KDM1A
GO: Biological Process	GO:0051960	regulation of nervous system development			1.405e-12	6.987e-09	6.987e-11	6.351e-10	57	1087	MYCN,SOX11,DLG5,TGIF2,MAP2,ATP8A2,WASF3,ETV5,HMGB2,TUBB2B,BRINP1,EYA1,DBN1,MDK,EZH2,CHN1,NREP,MEIS1,HOXA2,CDK5R1,SALL1,PTPRG,NRXN1,ASPM,KIF14,SYT1,PLAG1,ITM2C,NME1,RANBP1,TCF3,FZD3,PPP1R9A,SH3GL3,ENC1,CHD7,INPP5F,SIX1,CRABP2,ECT2,HMGA2,TENM4,TIAM1,HEY1,SLIT1,DLL3,LRRTM2,LRP4,ROBO1,ELAVL4,PAX2,CDK1,CDC20,FZD2,KDM1A,HDAC2,MYB
GO: Biological Process	GO:0048706	embryonic skeletal system development			1.705e-12	8.482e-09	8.398e-11	7.633e-10	20	140	MYCN,SOX11,DLK1,EYA1,HOXA1,HOXA2,HOXA5,HOXA6,HOXA7,HOXA11,HOXB9,HOXC4,HOXC6,HOXD1,HOXD4,HOXD10,HOXD11,COL2A1,SIX1,SIX2
GO: Biological Process	GO:0051303	establishment of chromosome localization			2.146e-12	1.067e-08	1.037e-10	9.424e-10	16	82	KIF18A,CENPE,CENPF,DLGAP5,SPDL1,NDC80,KIF14,PSRC1,KIFC1,KIF2C,BIRC5,CDCA8,SPAG5,CCNB1,CEP55,CENPQ
GO: Biological Process	GO:0000727	double-strand break repair via break-induced replication			2.147e-12	1.068e-08	1.037e-10	9.424e-10	8	11	MCM2,MCM3,MCM4,MCM6,MCM7,CDC7,CDC45,GINS2
GO: Biological Process	GO:0072331	signal transduction by p53 class mediator			2.373e-12	1.18e-08	1.135e-10	1.032e-09	27	276	BRIP1,BARD1,CHEK1,BLM,AURKA,CDK5R1,BRCA1,PRMT1,TAF5,DNA2,PCBP4,FOXM1,RBBP4,MSH2,RFC3,RFC4,E2F8,CCNB1,TPX2,EXO1,CDK1,CDC25C,KDM1A,PCNA,CDK2,HDAC2,AURKB
GO: Biological Process	GO:0032508	DNA duplex unwinding			2.463e-12	1.225e-08	1.167e-10	1.06e-09	18	111	BRIP1,MCM2,MCM3,MCM4,MCM6,MCM7,GINS1,CDC45,BLM,RAD54B,DSCC1,DNA2,RAD51,CHD7,RFC3,RFC4,GINS2,TOP2A
GO: Biological Process	GO:0045893	positive regulation of transcription, DNA-templated			2.557e-12	1.272e-08	1.2e-10	1.091e-09	73	1647	CDK8,MYCN,SOX11,ILF2,PATZ1,ZNF423,BEX1,PEG3,DLGAP5,ETV1,ETV4,ETV5,HMGB2,HMGB3,CHEK1,EYA1,MDK,MEIS1,STAT4,HOXA1,MEOX1,HOXA2,BLM,HOXA5,FZD7,HOXA7,HOXA10,HOXA11,HOXB9,HOXC4,SALL2,SALL1,BRCA1,HOXD4,HOXD10,PLAG1,MLLT11,HSF2,PSRC1,FOXC1,FOXD1,FOXM1,TCF3,WT1,ITGA8,CITED1,E2F5,CHD7,SIX1,ATAD2,E2F8,CCNA2,ARID3B,ZNF711,CCNE1,YEATS4,HMGA2,HEY1,ZNF516,AUTS2,H2AZ1,SMARCC1,PAX2,PRKDC,CKAP2,FZD2,TCF7L1,SIX2,TOP…
GO: Biological Process	GO:0050000	chromosome localization			2.614e-12	1.3e-08	1.215e-10	1.104e-09	16	83	KIF18A,CENPE,CENPF,DLGAP5,SPDL1,NDC80,KIF14,PSRC1,KIFC1,KIF2C,BIRC5,CDCA8,SPAG5,CCNB1,CEP55,CENPQ
GO: Biological Process	GO:0009952	anterior/posterior pattern specification			2.977e-12	1.481e-08	1.371e-10	1.246e-09	25	237	HOXA1,MEOX1,HOXA2,HOXA5,HOXA6,HOXA7,AURKA,HOXA10,HOXA11,HOXB9,HOXC4,HOXC6,GPC3,HOXD4,HOXD10,HOXD11,PGAP1,FGF8,FOXC1,WT1,HEY1,DLL3,PRKDC,TCF7L1,SIX2
GO: Biological Process	GO:0040007	growth			4.017e-12	1.998e-08	1.833e-10	1.666e-09	59	1181	KDM5B,PTTG1,MAP2,CACNA2D2,ATP8A2,NCAM1,DLK1,ACTL6A,CHEK1,DBN1,MDK,EZH2,GINS1,CHRNA1,MEIS1,MEX3C,HOXA5,TYMS,FZD7,AURKA,HOXA11,JARID2,NELL2,CDK5R1,CADM1,SALL1,GPC3,HOXD11,ASPM,KIF14,SYT1,PLAG1,FGF8,TMEM97,WASF1,UBE2E3,PSRC1,FOXC1,PLAAT1,WT1,CHD7,STIL,SIX1,CRABP2,CCNB1,YEATS4,HMGA2,TENM4,TIAM1,CCNB2,SLIT1,AUTS2,LRP4,ROBO1,CDK1,PRKDC,PRAME,KDM1A,HDAC2
GO: Biological Process	GO:1903508	positive regulation of nucleic acid-templated transcription			4.186e-12	2.082e-08	1.893e-10	1.721e-09	75	1736	CDK8,MYCN,SOX11,ILF2,PATZ1,ZNF423,BEX1,PEG3,DLGAP5,ETV1,ETV4,ETV5,HMGB2,HMGB3,ACTL6A,CHEK1,EYA1,MDK,MEIS1,STAT4,HOXA1,MEOX1,HOXA2,BLM,HOXA5,FZD7,HOXA7,HOXA10,HOXA11,HOXB9,HOXC4,SALL2,SALL1,BRCA1,HOXD4,HOXD10,PLAG1,MLLT11,HSF2,PSRC1,FOXC1,FOXD1,FOXM1,TCF3,WT1,ITGA8,APEX1,CITED1,E2F5,CHD7,SIX1,ATAD2,E2F8,CCNA2,ARID3B,ZNF711,CCNE1,YEATS4,HMGA2,HEY1,ZNF516,AUTS2,H2AZ1,SMARCC1,PAX2,PRKDC,CKAP2,FZD2,TC…
GO: Biological Process	GO:1902680	positive regulation of RNA biosynthetic process			4.305e-12	2.141e-08	1.929e-10	1.753e-09	75	1737	CDK8,MYCN,SOX11,ILF2,PATZ1,ZNF423,BEX1,PEG3,DLGAP5,ETV1,ETV4,ETV5,HMGB2,HMGB3,ACTL6A,CHEK1,EYA1,MDK,MEIS1,STAT4,HOXA1,MEOX1,HOXA2,BLM,HOXA5,FZD7,HOXA7,HOXA10,HOXA11,HOXB9,HOXC4,SALL2,SALL1,BRCA1,HOXD4,HOXD10,PLAG1,MLLT11,HSF2,PSRC1,FOXC1,FOXD1,FOXM1,TCF3,WT1,ITGA8,APEX1,CITED1,E2F5,CHD7,SIX1,ATAD2,E2F8,CCNA2,ARID3B,ZNF711,CCNE1,YEATS4,HMGA2,HEY1,ZNF516,AUTS2,H2AZ1,SMARCC1,PAX2,PRKDC,CKAP2,FZD2,TC…
GO: Biological Process	GO:1901992	positive regulation of mitotic cell cycle phase transition			4.576e-12	2.276e-08	2.032e-10	1.847e-09	17	100	CENPE,DLGAP5,CDC7,CDC45,FBXO5,DBF4,UBE2C,DTL,APEX1,BIRC5,CCNB1,CCNE1,LMNB1,CDK1,CDC6,CDC25A,CDC25C
GO: Biological Process	GO:0090592	DNA synthesis involved in DNA replication			5.319e-12	2.646e-08	2.311e-10	2.101e-09	9	17	MCM3,MCM4,MCM7,GINS1,DNA2,RFC3,RFC4,GINS2,PCNA
GO: Biological Process	GO:0006271	DNA strand elongation involved in DNA replication			5.319e-12	2.646e-08	2.311e-10	2.101e-09	9	17	MCM3,MCM4,MCM7,GINS1,DNA2,RFC3,RFC4,GINS2,PCNA
GO: Biological Process	GO:1901989	positive regulation of cell cycle phase transition			5.343e-12	2.658e-08	2.311e-10	2.101e-09	18	116	CENPE,DLGAP5,EZH2,CDC7,CDC45,FBXO5,DBF4,UBE2C,DTL,APEX1,BIRC5,CCNB1,CCNE1,LMNB1,CDK1,CDC6,CDC25A,CDC25C
GO: Biological Process	GO:0051310	metaphase plate congression			6.31e-12	3.139e-08	2.706e-10	2.459e-09	14	62	KIF18A,CENPE,CENPF,SPDL1,NDC80,KIF14,PSRC1,KIFC1,KIF2C,CDCA8,SPAG5,CCNB1,CEP55,CENPQ
GO: Biological Process	GO:0048568	embryonic organ development			6.737e-12	3.351e-08	2.864e-10	2.603e-09	36	506	MYCN,SOX11,ATP8A2,TUBB2B,EYA1,HOXA1,HOXA2,HOXA5,HOXA6,HOXA7,HOXA11,HOXC4,SALL1,HOXD4,HOXD10,HOXD11,FGF8,FOXC1,COL2A1,CHRNA9,FZD3,SOBP,ITGA8,CITED1,CHD7,STIL,SIX1,E2F8,HEY1,VASH2,PAX2,FZD2,PLK4,SIX2,KDM1A,MYB
GO: Biological Process	GO:0010389	regulation of G2/M transition of mitotic cell cycle			6.959e-12	3.461e-08	2.933e-10	2.666e-09	23	206	CENPF,CEP76,CHEK1,HMMR,CDC7,BLM,AURKA,NEK2,FBXO5,BRCA1,KIF14,DTL,CCNB1,HMGA2,LMNB1,TPX2,CDK1,CDC6,CDC25A,CDC25C,PLK4,CDK2,AURKB
GO: Biological Process	GO:0060284	regulation of cell development			7.183e-12	3.573e-08	2.985e-10	2.713e-09	57	1132	MYCN,SOX11,DLG5,TGIF2,MAP2,ATP8A2,ETV5,HMGB2,TUBB2B,BRINP1,EYA1,DBN1,MDK,EZH2,CHN1,NREP,MEIS1,HOXA2,AURKA,HOXA11,CDK5R1,HOXC4,SALL1,PTPRG,HOXD11,ASPM,KIF14,SYT1,PLAG1,ITM2C,NME1,RANBP1,TCF3,FZD3,PPP1R9A,SH3GL3,ENC1,CHD7,INPP5F,SIX1,CRABP2,ECT2,HMGA2,TENM4,TIAM1,HEY1,SLIT1,DLL3,LRP4,ROBO1,ELAVL4,CDK1,HAS2,CDC20,KDM1A,HDAC2,MYB
GO: Biological Process	GO:0006275	regulation of DNA replication			7.202e-12	3.582e-08	2.985e-10	2.713e-09	18	118	DACH1,CDC7,BLM,FBXO5,DBF4,TIMELESS,DSCC1,DNA2,RFC3,RFC4,GMNN,E2F8,CCNA2,MSH6,CDK1,CDC6,PCNA,CDK2
GO: Biological Process	GO:0051254	positive regulation of RNA metabolic process			7.271e-12	3.616e-08	2.989e-10	2.717e-09	77	1829	CDK8,MYCN,SOX11,ILF2,PATZ1,ZNF423,BEX1,PEG3,DLGAP5,ETV1,ETV4,ETV5,HMGB2,HMGB3,ACTL6A,CHEK1,EYA1,MDK,MEIS1,STAT4,HOXA1,MEOX1,HOXA2,BLM,HOXA5,FZD7,HOXA7,HOXA10,HOXA11,HOXB9,HOXC4,SALL2,SALL1,BRCA1,HOXD4,HOXD10,PLAG1,MLLT11,HSF2,PSRC1,FOXC1,FOXD1,FOXM1,TCF3,MEX3D,WT1,ITGA8,APEX1,CITED1,E2F5,CHD7,SIX1,ATAD2,E2F8,CCNA2,CCNB1,ARID3B,ZNF711,CCNE1,YEATS4,HMGA2,HEY1,ZNF516,AUTS2,H2AZ1,SMARCC1,PAX2,PRKDC,C…
GO: Biological Process	GO:0048589	developmental growth			8.245e-12	4.101e-08	3.362e-10	3.055e-09	47	821	KDM5B,MAP2,CACNA2D2,ATP8A2,NCAM1,DLK1,CHEK1,DBN1,MDK,EZH2,GINS1,CHRNA1,MEIS1,MEX3C,HOXA5,TYMS,FZD7,AURKA,HOXA11,JARID2,CDK5R1,CADM1,SALL1,HOXD11,ASPM,SYT1,PLAG1,FGF8,WASF1,FOXC1,WT1,CHD7,STIL,SIX1,CRABP2,CCNB1,HMGA2,TENM4,TIAM1,SLIT1,AUTS2,LRP4,ROBO1,CDK1,PRKDC,KDM1A,HDAC2
GO: Biological Process	GO:0003002	regionalization			9.831e-12	4.89e-08	3.975e-10	3.613e-09	31	386	HOXA1,MEOX1,HOXA2,HOXA5,HOXA6,HOXA7,AURKA,HOXA10,HOXA11,HOXB9,HOXC4,HOXC6,GPC3,HOXD4,HOXD10,HOXD11,PGAP1,FGF8,FOXC1,FOXD1,WT1,SIX1,HEY1,DLL3,CXXC4,LRP4,ROBO1,PAX2,PRKDC,TCF7L1,SIX2
GO: Biological Process	GO:0007389	pattern specification process			1.426e-11	7.093e-08	5.72e-10	5.199e-09	35	493	EYA1,BCOR,HOXA1,MEOX1,HOXA2,HOXA5,HOXA6,HOXA7,AURKA,HOXA10,HOXA11,HOXB9,HOXC4,HOXC6,GPC3,HOXD4,HOXD10,HOXD11,PGAP1,FGF8,FOXC1,FOXD1,WT1,CITED1,STIL,SIX1,HEY1,DLL3,CXXC4,LRP4,ROBO1,PAX2,PRKDC,TCF7L1,SIX2
GO: Biological Process	GO:0050767	regulation of neurogenesis			2.328e-11	1.158e-07	9.264e-10	8.42e-09	51	971	MYCN,SOX11,DLG5,TGIF2,MAP2,ATP8A2,ETV5,HMGB2,TUBB2B,BRINP1,EYA1,DBN1,MDK,EZH2,CHN1,NREP,MEIS1,HOXA2,CDK5R1,SALL1,PTPRG,ASPM,SYT1,PLAG1,ITM2C,NME1,RANBP1,TCF3,FZD3,PPP1R9A,SH3GL3,ENC1,CHD7,INPP5F,SIX1,CRABP2,ECT2,HMGA2,TENM4,TIAM1,HEY1,SLIT1,DLL3,LRP4,ROBO1,ELAVL4,CDK1,CDC20,KDM1A,HDAC2,MYB
GO: Biological Process	GO:0090329	regulation of DNA-dependent DNA replication			3.159e-11	1.571e-07	1.247e-09	1.134e-08	13	57	DACH1,CDC7,BLM,FBXO5,DBF4,TIMELESS,DSCC1,RFC3,RFC4,GMNN,E2F8,MSH6,CDK2
GO: Biological Process	GO:0034502	protein localization to chromosome			3.359e-11	1.671e-07	1.315e-09	1.196e-08	18	129	CENPN,CENPA,HJURP,NASP,OIP5,EZH2,TTK,SPDL1,NDC80,BUB1B,MACROH2A2,RBBP4,MIS18A,CENPU,MSH2,CENPQ,CDK1,AURKB
GO: Biological Process	GO:1902749	regulation of cell cycle G2/M phase transition			3.572e-11	1.777e-07	1.388e-09	1.262e-08	23	223	CENPF,CEP76,CHEK1,HMMR,CDC7,BLM,AURKA,NEK2,FBXO5,BRCA1,KIF14,DTL,CCNB1,HMGA2,LMNB1,TPX2,CDK1,CDC6,CDC25A,CDC25C,PLK4,CDK2,AURKB
GO: Biological Process	GO:0048754	branching morphogenesis of an epithelial tube			7.04e-11	3.502e-07	2.714e-09	2.467e-08	21	190	MYCN,KDM5B,DLG5,ETV4,ETV5,EYA1,MDK,HOXA5,HOXA11,SALL1,GPC3,HOXD11,FGF8,TIMELESS,FOXD1,WT1,CITED1,SIX1,HMGA2,PAX2,SIX2
GO: Biological Process	GO:0060675	ureteric bud morphogenesis			8.079e-11	4.019e-07	3.091e-09	2.81e-08	14	74	EYA1,HOXA11,SALL1,GPC3,HOXD11,FGF8,TIMELESS,FOXD1,WT1,CITED1,SIX1,HEY1,PAX2,SIX2
GO: Biological Process	GO:0009887	animal organ morphogenesis			8.555e-11	4.255e-07	3.248e-09	2.952e-08	58	1240	MYCN,SOX11,KDM5B,DLG5,ATP8A2,ETV4,ETV5,EYA1,BCOR,MDK,MEIS1,HOXA1,HOXA2,HOXA5,HOXA6,FZD7,HOXA7,HOXA11,HOXC4,SALL1,GPC3,HOXD4,HOXD10,HOXD11,MKI67,PLAG1,FGF8,TIMELESS,FOXC1,FOXD1,COL2A1,COL13A1,CHRNA9,FZD3,NSD2,SOBP,WT1,ITGA8,CITED1,E2F5,CHD7,STIL,SIX1,GMNN,HMGA2,TIAM1,HEY1,TLE1,SLIT1,LRP4,SMARCC1,ROBO1,PAX2,HAS2,FZD2,TMEM100,SIX2,HDAC2
GO: Biological Process	GO:0000079	regulation of cyclin-dependent protein serine/threonine kinase activity			9.397e-11	4.674e-07	3.541e-09	3.218e-08	16	104	CDKN3,BLM,CKS1B,CKS2,CDK5R1,PSRC1,CCNJ,STIL,CCNA2,CCNB1,CCNE1,CCNB2,CCNE2,CDC6,CDC25A,CDC25C
GO: Biological Process	GO:0072171	mesonephric tubule morphogenesis			9.767e-11	4.858e-07	3.626e-09	3.295e-08	14	75	EYA1,HOXA11,SALL1,GPC3,HOXD11,FGF8,TIMELESS,FOXD1,WT1,CITED1,SIX1,HEY1,PAX2,SIX2
GO: Biological Process	GO:0072395	signal transduction involved in cell cycle checkpoint			9.767e-11	4.858e-07	3.626e-09	3.295e-08	14	75	SOX11,CHEK1,AURKA,BRCA1,PRMT1,PCBP4,DTL,E2F8,CCNB1,CDK1,PRKDC,CDC25C,PCNA,CDK2
GO: Biological Process	GO:0048704	embryonic skeletal system morphogenesis			1.09e-10	5.421e-07	4.016e-09	3.65e-08	16	105	MYCN,SOX11,EYA1,HOXA1,HOXA2,HOXA5,HOXA6,HOXA7,HOXA11,HOXC4,HOXD4,HOXD10,HOXD11,COL2A1,SIX1,SIX2
GO: Biological Process	GO:2000113	negative regulation of cellular macromolecule biosynthetic process			1.222e-10	6.078e-07	4.469e-09	4.062e-08	68	1605	SOX11,KDM5B,TGIF2,CENPF,PATZ1,ZNF423,BACH2,PEG3,DACH1,HMGB2,HIC2,CHEK1,BCL7A,BCOR,EZH2,CDC45,HOXA2,BLM,TYMS,HOXA7,JARID2,CDK5R1,SALL2,SALL1,FBXO5,BRCA1,DHFR,MACROH2A2,TIMELESS,ITM2C,FOXC1,FOXD1,DNMT3A,FOXM1,TCF3,NSD2,MEX3D,ENC1,WT1,BIRC5,CITED1,DEPDC1,E2F5,SIX1,ATAD2,SUV39H2,GMNN,E2F8,CCNE1,MSH6,IGF2BP2,HMGA2,TIA1,HEY1,TLE1,TLE4,PAX2,CDC6,PRAME,TCF7L1,SIX2,KDM1A,PCNA,CDK2,HDAC2,MYB,AURKB,HELLS
GO: Biological Process	GO:0045934	negative regulation of nucleobase-containing compound metabolic process			1.372e-10	6.823e-07	4.98e-09	4.527e-08	67	1573	SOX11,KDM5B,TGIF2,CENPF,PATZ1,ZNF423,BACH2,PEG3,DACH1,BARD1,HMGB2,HIC2,CHEK1,BCL7A,BCOR,EZH2,CDC45,HOXA2,BLM,HOXA7,JARID2,CDK5R1,HOXC6,AUNIP,SALL2,SALL1,BRCA1,MACROH2A2,TIMELESS,PARPBP,PCBP4,FOXC1,FOXD1,DNMT3A,FOXM1,TCF3,NSD2,WT1,APEX1,BIRC5,CITED1,DEPDC1,E2F5,MSH2,SIX1,ATAD2,SUV39H2,GMNN,E2F8,CCNE1,NBAS,MSH6,HMGA2,HEY1,TLE1,TLE4,PAX2,PRAME,TCF7L1,SIX2,KDM1A,PCNA,CDK2,HDAC2,MYB,AURKB,HELLS
GO: Biological Process	GO:1904029	regulation of cyclin-dependent protein kinase activity			1.684e-10	8.377e-07	6.07e-09	5.517e-08	16	108	CDKN3,BLM,CKS1B,CKS2,CDK5R1,PSRC1,CCNJ,STIL,CCNA2,CCNB1,CCNE1,CCNB2,CCNE2,CDC6,CDC25A,CDC25C
GO: Biological Process	GO:0048562	embryonic organ morphogenesis			1.934e-10	9.618e-07	6.919e-09	6.289e-08	27	334	MYCN,SOX11,ATP8A2,EYA1,HOXA1,HOXA2,HOXA5,HOXA6,HOXA7,HOXA11,HOXC4,SALL1,HOXD4,HOXD10,HOXD11,FGF8,COL2A1,CHRNA9,FZD3,SOBP,ITGA8,CHD7,STIL,SIX1,PAX2,FZD2,SIX2
GO: Biological Process	GO:0010558	negative regulation of macromolecule biosynthetic process			2.163e-10	1.076e-06	7.683e-09	6.984e-08	70	1700	SOX11,KDM5B,TGIF2,CENPF,PATZ1,ZNF423,BACH2,PEG3,DACH1,HMGB2,HIC2,CHEK1,BCL7A,BCOR,EZH2,CDC45,HOXA2,BLM,TYMS,HOXA7,JARID2,CDK5R1,HOXC6,SALL2,SALL1,FBXO5,BRCA1,DHFR,MACROH2A2,TIMELESS,ITM2C,FOXC1,FOXD1,DNMT3A,FOXM1,TCF3,NSD2,MEX3D,ENC1,WT1,APEX1,BIRC5,CITED1,DEPDC1,E2F5,SIX1,ATAD2,SUV39H2,GMNN,E2F8,CCNE1,MSH6,IGF2BP2,HMGA2,TIA1,HEY1,TLE1,TLE4,PAX2,CDC6,PRAME,TCF7L1,SIX2,KDM1A,PCNA,CDK2,HDAC2,MYB,AU…
GO: Biological Process	GO:0001658	branching involved in ureteric bud morphogenesis			2.267e-10	1.128e-06	7.999e-09	7.27e-08	13	66	EYA1,HOXA11,SALL1,GPC3,HOXD11,FGF8,TIMELESS,FOXD1,WT1,CITED1,SIX1,PAX2,SIX2
GO: Biological Process	GO:0022616	DNA strand elongation			2.549e-10	1.268e-06	8.927e-09	8.114e-08	9	24	MCM3,MCM4,MCM7,GINS1,DNA2,RFC3,RFC4,GINS2,PCNA
GO: Biological Process	GO:0010639	negative regulation of organelle organization			2.82e-10	1.402e-06	9.808e-09	8.914e-08	31	441	PTTG1,MAP2,CENPE,CENPF,MCM2,CHEK1,DBN1,BCOR,TRIP13,TTK,ADD2,SPDL1,JARID2,NEK2,PTTG3P,FBXO5,BRCA1,NDC80,BUB1,BUB1B,PPP1R9A,BIRC5,STMN1,ATAD2,CCNB1,CKAP2,CDC20,TOP2A,KDM1A,MAD2L1,AURKB
GO: Biological Process	GO:0071824	protein-DNA complex subunit organization			3.349e-10	1.666e-06	1.157e-08	1.052e-07	28	367	CENPN,CENPA,CENPE,CENPF,HJURP,NASP,MCM2,OIP5,HMGB2,MCM3,MCM4,MCM6,MCM7,CDC45,H2AW,NEK2,ANP32E,MACROH2A2,RAD51,RBBP4,MIS18A,CENPU,GMNN,CENPQ,H2AX,SMARCC1,AURKB,HELLS
GO: Biological Process	GO:0034508	centromere complex assembly			3.996e-10	1.988e-06	1.371e-08	1.246e-07	12	56	CENPN,CENPA,CENPE,CENPF,HJURP,NASP,OIP5,RBBP4,MIS18A,CENPU,CENPQ,HELLS
GO: Biological Process	GO:0072078	nephron tubule morphogenesis			4.025e-10	2.002e-06	1.371e-08	1.246e-07	14	83	EYA1,HOXA11,SALL1,GPC3,HOXD11,FGF8,TIMELESS,FOXD1,WT1,CITED1,SIX1,HEY1,PAX2,SIX2
GO: Biological Process	GO:0000077	DNA damage checkpoint			5.3e-10	2.636e-06	1.793e-08	1.63e-07	18	152	BRIP1,CHEK1,BLM,AURKA,BRCA1,PRMT1,PCBP4,DTL,MSH2,E2F8,CCNB1,HMGA2,H2AX,CDK1,PRKDC,CDC25C,PCNA,CDK2
GO: Biological Process	GO:0072088	nephron epithelium morphogenesis			5.591e-10	2.781e-06	1.879e-08	1.708e-07	14	85	EYA1,HOXA11,SALL1,GPC3,HOXD11,FGF8,TIMELESS,FOXD1,WT1,CITED1,SIX1,HEY1,PAX2,SIX2
GO: Biological Process	GO:0051094	positive regulation of developmental process			6.482e-10	3.224e-06	2.164e-08	1.967e-07	67	1632	SOX11,KDM5B,DLG5,TGIF2,CACNA2D2,ATP8A2,WASF3,ETV5,HMGB2,NCAM1,TUBB2B,BRINP1,DBN1,MDK,EZH2,HOXA5,AURKA,HOXA11,HOXC4,SALL1,FBXO5,BRCA1,NRXN1,HOXD11,ASPM,SYT1,PLAG1,PRMT1,FGF8,MACROH2A2,NME1,FOXC1,FOXD1,RANBP1,TCF3,FZD3,NSD2,PPP1R9A,SH3GL3,ENC1,WT1,CHD7,MSH2,SIX1,CRABP2,ECT2,EDN3,CCNB1,CCNE1,HMGA2,TENM4,TIAM1,HEY1,DLL3,VASH2,LRRTM2,ROBO1,ELAVL4,PAX2,CDK1,PRKDC,HAS2,CDC20,TMEM100,KDM1A,HDAC2,MYB
GO: Biological Process	GO:0001655	urogenital system development			7.388e-10	3.675e-06	2.45e-08	2.227e-07	28	380	SOX11,DLG5,CENPF,EYA1,HOXA11,SALL1,GPC3,HOXD11,PLAG1,FGF8,TIMELESS,NUP160,FOXC1,FOXD1,WT1,ITGA8,CITED1,ODC1,PPAT,SIX1,CEP55,HEY1,LRP4,SMARCC1,PAX2,HAS2,SIX2,HELLS
GO: Biological Process	GO:0072028	nephron morphogenesis			7.694e-10	3.827e-06	2.535e-08	2.304e-07	14	87	EYA1,HOXA11,SALL1,GPC3,HOXD11,FGF8,TIMELESS,FOXD1,WT1,CITED1,SIX1,HEY1,PAX2,SIX2
GO: Biological Process	GO:0007080	mitotic metaphase plate congression			7.888e-10	3.923e-06	2.581e-08	2.346e-07	11	47	KIF18A,CENPE,SPDL1,NDC80,KIF14,PSRC1,KIFC1,KIF2C,CDCA8,CCNB1,CEP55
GO: Biological Process	GO:0061333	renal tubule morphogenesis			8.997e-10	4.475e-06	2.925e-08	2.659e-07	14	88	EYA1,HOXA11,SALL1,GPC3,HOXD11,FGF8,TIMELESS,FOXD1,WT1,CITED1,SIX1,HEY1,PAX2,SIX2
GO: Biological Process	GO:0031327	negative regulation of cellular biosynthetic process			9.904e-10	4.926e-06	3.199e-08	2.908e-07	70	1761	SOX11,KDM5B,TGIF2,CENPF,PATZ1,ZNF423,BACH2,PEG3,DACH1,HMGB2,HIC2,CHEK1,BCL7A,BCOR,EZH2,CDC45,HOXA2,BLM,TYMS,HOXA7,JARID2,CDK5R1,HOXC6,SALL2,SALL1,FBXO5,BRCA1,DHFR,MACROH2A2,TIMELESS,ITM2C,FOXC1,FOXD1,DNMT3A,FOXM1,TCF3,NSD2,MEX3D,ENC1,WT1,APEX1,BIRC5,CITED1,DEPDC1,E2F5,SIX1,ATAD2,SUV39H2,GMNN,E2F8,CCNE1,MSH6,IGF2BP2,HMGA2,TIA1,HEY1,TLE1,TLE4,PAX2,CDC6,PRAME,TCF7L1,SIX2,KDM1A,PCNA,CDK2,HDAC2,MYB,AU…
GO: Biological Process	GO:0072422	signal transduction involved in DNA damage checkpoint			1.014e-09	5.045e-06	3.234e-08	2.939e-07	13	74	CHEK1,AURKA,BRCA1,PRMT1,PCBP4,DTL,E2F8,CCNB1,CDK1,PRKDC,CDC25C,PCNA,CDK2
GO: Biological Process	GO:0072401	signal transduction involved in DNA integrity checkpoint			1.014e-09	5.045e-06	3.234e-08	2.939e-07	13	74	CHEK1,AURKA,BRCA1,PRMT1,PCBP4,DTL,E2F8,CCNB1,CDK1,PRKDC,CDC25C,PCNA,CDK2
GO: Biological Process	GO:0045664	regulation of neuron differentiation			1.155e-09	5.744e-06	3.658e-08	3.325e-07	42	791	MYCN,SOX11,DLG5,TGIF2,MAP2,ATP8A2,ETV5,TUBB2B,BRINP1,EYA1,DBN1,MDK,EZH2,CHN1,NREP,MEIS1,HOXA2,CDK5R1,SALL1,PTPRG,ASPM,SYT1,ITM2C,NME1,RANBP1,TCF3,PPP1R9A,SH3GL3,ENC1,INPP5F,SIX1,CRABP2,ECT2,TIAM1,HEY1,SLIT1,LRP4,ROBO1,ELAVL4,CDC20,KDM1A,HDAC2
GO: Biological Process	GO:0051052	regulation of DNA metabolic process			1.251e-09	6.223e-06	3.939e-08	3.58e-07	28	389	DACH1,CHEK1,EYA1,BLM,NEK2,AUNIP,BRCA1,TIMELESS,DSCC1,PARPBP,DNMT3A,RAD51,FOXM1,NSD2,MIS18A,WT1,MSH2,RFC3,RFC4,RAD51AP1,MSH6,HMGA2,H2AX,PRKDC,KDM1A,PCNA,CDK2,AURKB
GO: Biological Process	GO:0001763	morphogenesis of a branching structure			1.482e-09	7.371e-06	4.636e-08	4.213e-07	22	246	MYCN,KDM5B,DLG5,ETV4,ETV5,EYA1,MDK,HOXA5,HOXA11,SALL1,GPC3,HOXD11,FGF8,TIMELESS,FOXD1,COL13A1,WT1,CITED1,SIX1,HMGA2,PAX2,SIX2
GO: Biological Process	GO:0061138	morphogenesis of a branching epithelium			1.91e-09	9.498e-06	5.936e-08	5.396e-07	21	227	MYCN,KDM5B,DLG5,ETV4,ETV5,EYA1,MDK,HOXA5,HOXA11,SALL1,GPC3,HOXD11,FGF8,TIMELESS,FOXD1,WT1,CITED1,SIX1,HMGA2,PAX2,SIX2
GO: Biological Process	GO:0048598	embryonic morphogenesis			1.957e-09	9.733e-06	6.045e-08	5.495e-07	38	681	MYCN,SOX11,TGIF2,ATP8A2,EYA1,HOXA1,HOXA2,HOXA5,HOXA6,FZD7,HOXA7,HOXA10,HOXA11,HOXC4,SALL1,GPC3,HOXD4,HOXD10,HOXD11,FGF8,FOXC1,COL2A1,TCF3,CHRNA9,FZD3,SOBP,ITGA8,CHD7,STIL,SIX1,CRABP2,HMGA2,TENM4,LRP4,PAX2,FZD2,SIX2,HDAC2
GO: Biological Process	GO:0001657	ureteric bud development			2.067e-09	1.028e-05	6.348e-08	5.77e-07	15	110	EYA1,HOXA11,SALL1,GPC3,HOXD11,FGF8,TIMELESS,FOXC1,FOXD1,WT1,CITED1,SIX1,HEY1,PAX2,SIX2
GO: Biological Process	GO:0045944	positive regulation of transcription by RNA polymerase II			2.186e-09	1.087e-05	6.671e-08	6.063e-07	57	1315	CDK8,MYCN,SOX11,PATZ1,BEX1,PEG3,DLGAP5,ETV1,ETV4,ETV5,HMGB2,HMGB3,EYA1,MEIS1,STAT4,HOXA1,MEOX1,HOXA2,HOXA5,HOXA7,HOXA10,HOXB9,HOXC4,SALL2,SALL1,BRCA1,HOXD4,HOXD10,PLAG1,HSF2,FOXC1,FOXD1,FOXM1,TCF3,WT1,ITGA8,E2F5,CHD7,SIX1,ATAD2,E2F8,ARID3B,YEATS4,HMGA2,HEY1,AUTS2,H2AZ1,SMARCC1,PAX2,PRKDC,CKAP2,TCF7L1,SIX2,TOP2A,KDM1A,HDAC2,MYB
GO: Biological Process	GO:0006282	regulation of DNA repair			2.201e-09	1.095e-05	6.675e-08	6.067e-07	16	128	CHEK1,EYA1,BLM,AUNIP,BRCA1,TIMELESS,PARPBP,RAD51,FOXM1,NSD2,RAD51AP1,HMGA2,H2AX,PRKDC,KDM1A,PCNA
GO: Biological Process	GO:0009890	negative regulation of biosynthetic process			2.33e-09	1.159e-05	7e-08	6.363e-07	70	1797	SOX11,KDM5B,TGIF2,CENPF,PATZ1,ZNF423,BACH2,PEG3,DACH1,HMGB2,HIC2,CHEK1,BCL7A,BCOR,EZH2,CDC45,HOXA2,BLM,TYMS,HOXA7,JARID2,CDK5R1,HOXC6,SALL2,SALL1,FBXO5,BRCA1,DHFR,MACROH2A2,TIMELESS,ITM2C,FOXC1,FOXD1,DNMT3A,FOXM1,TCF3,NSD2,MEX3D,ENC1,WT1,APEX1,BIRC5,CITED1,DEPDC1,E2F5,SIX1,ATAD2,SUV39H2,GMNN,E2F8,CCNE1,MSH6,IGF2BP2,HMGA2,TIA1,HEY1,TLE1,TLE4,PAX2,CDC6,PRAME,TCF7L1,SIX2,KDM1A,PCNA,CDK2,HDAC2,MYB,AU…
GO: Biological Process	GO:0072164	mesonephric tubule development			2.35e-09	1.169e-05	7e-08	6.363e-07	15	111	EYA1,HOXA11,SALL1,GPC3,HOXD11,FGF8,TIMELESS,FOXC1,FOXD1,WT1,CITED1,SIX1,HEY1,PAX2,SIX2
GO: Biological Process	GO:0072163	mesonephric epithelium development			2.35e-09	1.169e-05	7e-08	6.363e-07	15	111	EYA1,HOXA11,SALL1,GPC3,HOXD11,FGF8,TIMELESS,FOXC1,FOXD1,WT1,CITED1,SIX1,HEY1,PAX2,SIX2
GO: Biological Process	GO:1901796	regulation of signal transduction by p53 class mediator			2.4e-09	1.194e-05	7.106e-08	6.458e-07	19	187	BRIP1,BARD1,CHEK1,BLM,AURKA,CDK5R1,BRCA1,TAF5,DNA2,PCBP4,RBBP4,RFC3,RFC4,TPX2,EXO1,KDM1A,CDK2,HDAC2,AURKB
GO: Biological Process	GO:0065004	protein-DNA complex assembly			2.577e-09	1.282e-05	7.586e-08	6.895e-07	25	325	CENPN,CENPA,CENPE,CENPF,HJURP,NASP,MCM2,OIP5,HMGB2,MCM3,MCM4,MCM6,MCM7,CDC45,NEK2,MACROH2A2,RAD51,RBBP4,MIS18A,CENPU,GMNN,CENPQ,H2AX,AURKB,HELLS
GO: Biological Process	GO:0044774	mitotic DNA integrity checkpoint			2.668e-09	1.327e-05	7.807e-08	7.096e-07	15	112	BLM,AURKA,PRMT1,PCBP4,MSH2,E2F8,CCNB1,HMGA2,CDK1,PRKDC,CDC6,CDC25C,TOP2A,PCNA,CDK2
GO: Biological Process	GO:0051253	negative regulation of RNA metabolic process			2.692e-09	1.339e-05	7.83e-08	7.117e-07	61	1467	SOX11,KDM5B,TGIF2,CENPF,PATZ1,ZNF423,BACH2,PEG3,DACH1,BARD1,HMGB2,HIC2,BCL7A,BCOR,EZH2,CDC45,HOXA2,HOXA7,JARID2,CDK5R1,HOXC6,SALL2,SALL1,BRCA1,MACROH2A2,TIMELESS,PCBP4,FOXC1,FOXD1,DNMT3A,FOXM1,TCF3,NSD2,WT1,APEX1,BIRC5,CITED1,DEPDC1,E2F5,SIX1,ATAD2,SUV39H2,GMNN,E2F8,CCNE1,NBAS,HMGA2,HEY1,TLE1,TLE4,PAX2,PRAME,TCF7L1,SIX2,KDM1A,PCNA,CDK2,HDAC2,MYB,AURKB,HELLS
GO: Biological Process	GO:0031175	neuron projection development			2.959e-09	1.472e-05	8.556e-08	7.777e-07	52	1150	DLG5,MAP2,ATP8A2,ETV1,ETV4,NCAM1,TUBB2B,DBN1,MDK,EZH2,CHN1,NREP,GFRA1,HOXA1,HOXA2,AURKA,CDK5R1,PTPRG,NRXN1,UCHL1,DHFR,SYT1,PRMT1,FGF8,ITM2C,NME1,WASF1,NPY,FOXD1,RANBP1,NPTX2,NRTN,FZD3,PPP1R9A,ENC1,DPYSL4,STMN1,INPP5F,CRABP2,EFNA4,TIAM1,HEY1,SLIT1,UNC5C,AUTS2,LRP4,ROBO1,ELAVL4,PAX2,CDC20,KDM1A,HDAC2
GO: Biological Process	GO:0051129	negative regulation of cellular component organization			3.23e-09	1.607e-05	9.287e-08	8.441e-07	42	819	PTTG1,MAP2,CENPE,CENPF,MCM2,CHEK1,DBN1,BCOR,TRIP13,TTK,ADD2,SPDL1,JARID2,NEK2,PTTG3P,CDK5R1,FBXO5,BRCA1,PTPRG,NRXN1,NDC80,BUB1,BUB1B,KIF14,ITM2C,PPP1R9A,SH3GL3,BIRC5,STMN1,INPP5F,ATAD2,CCNB1,SLIT1,LRRTM2,LRP4,CKAP2,CDC20,TOP2A,KDM1A,MAD2L1,HDAC2,AURKB
GO: Biological Process	GO:0048732	gland development			3.389e-09	1.686e-05	9.688e-08	8.806e-07	32	517	CDO1,KDM5B,ETV4,ETV5,MDK,EZH2,HOXA5,TYMS,AURKA,JARID2,HOXB9,CADM1,SALL1,MKI67,PLAG1,FGF8,NME1,FOXC1,FOXM1,WT1,PPAT,SIX1,E2F8,HMGA2,CCNB2,ASNS,SMARCC1,ROBO1,PRKDC,KDM1A,PCNA,MYB
GO: Biological Process	GO:0007010	cytoskeleton organization			3.599e-09	1.79e-05	1.023e-07	9.298e-07	66	1664	NUSAP1,KIF18A,CENPA,MAP2,CENPE,EFS,PCLAF,ATP8A2,LRRC49,WASF3,SPC25,KIF4A,TUBB2B,CEP76,CHEK1,EYA1,DBN1,MDK,TTK,SEPTIN6,ADD2,SPDL1,AURKA,NEK2,CDK5R1,AUNIP,FBXO5,BRCA1,NDC80,ASPM,KIF14,SAC3D1,WASF1,PSRC1,KIF11,KIFC1,KIF2C,RANBP1,KIF23,RAE1,IFT81,PPP1R9A,BIRC5,STMN1,STIL,PRC1,ECT2,SPAG5,CCNB1,KIF20A,TBC1D8,DNAAF2,YEATS4,TPX2,AUTS2,RACGAP1,FZD10,CDK1,CKAP2,CDC20,KIF18B,PLK4,MAD2L1,CDK2,HDAC2,AURKB
GO: Biological Process	GO:1903507	negative regulation of nucleic acid-templated transcription			3.68e-09	1.83e-05	1.04e-07	9.453e-07	58	1370	SOX11,KDM5B,TGIF2,CENPF,PATZ1,ZNF423,BACH2,PEG3,DACH1,HMGB2,HIC2,BCL7A,BCOR,EZH2,CDC45,HOXA2,HOXA7,JARID2,CDK5R1,HOXC6,SALL2,SALL1,BRCA1,MACROH2A2,TIMELESS,FOXC1,FOXD1,DNMT3A,FOXM1,TCF3,NSD2,WT1,APEX1,BIRC5,CITED1,DEPDC1,E2F5,SIX1,ATAD2,SUV39H2,GMNN,E2F8,CCNE1,HMGA2,HEY1,TLE1,TLE4,PAX2,PRAME,TCF7L1,SIX2,KDM1A,PCNA,CDK2,HDAC2,MYB,AURKB,HELLS
GO: Biological Process	GO:0001823	mesonephros development			3.873e-09	1.926e-05	1.085e-07	9.858e-07	15	115	EYA1,HOXA11,SALL1,GPC3,HOXD11,FGF8,TIMELESS,FOXC1,FOXD1,WT1,CITED1,SIX1,HEY1,PAX2,SIX2
GO: Biological Process	GO:1902679	negative regulation of RNA biosynthetic process			3.881e-09	1.93e-05	1.085e-07	9.858e-07	58	1372	SOX11,KDM5B,TGIF2,CENPF,PATZ1,ZNF423,BACH2,PEG3,DACH1,HMGB2,HIC2,BCL7A,BCOR,EZH2,CDC45,HOXA2,HOXA7,JARID2,CDK5R1,HOXC6,SALL2,SALL1,BRCA1,MACROH2A2,TIMELESS,FOXC1,FOXD1,DNMT3A,FOXM1,TCF3,NSD2,WT1,APEX1,BIRC5,CITED1,DEPDC1,E2F5,SIX1,ATAD2,SUV39H2,GMNN,E2F8,CCNE1,HMGA2,HEY1,TLE1,TLE4,PAX2,PRAME,TCF7L1,SIX2,KDM1A,PCNA,CDK2,HDAC2,MYB,AURKB,HELLS
GO: Biological Process	GO:1902969	mitotic DNA replication			4.219e-09	2.098e-05	1.169e-07	1.062e-06	7	15	MCM2,MCM3,MCM4,MCM6,GINS1,CDC45,RAD51
GO: Biological Process	GO:0072001	renal system development			4.229e-09	2.104e-05	1.169e-07	1.062e-06	25	333	SOX11,DLG5,CENPF,EYA1,HOXA11,SALL1,GPC3,HOXD11,FGF8,TIMELESS,NUP160,FOXC1,FOXD1,WT1,ITGA8,CITED1,ODC1,PPAT,SIX1,CEP55,HEY1,LRP4,PAX2,HAS2,SIX2
GO: Biological Process	GO:0001656	metanephros development			4.415e-09	2.196e-05	1.213e-07	1.103e-06	14	99	DLG5,EYA1,HOXA11,SALL1,GPC3,HOXD11,FGF8,FOXD1,WT1,ITGA8,CITED1,SIX1,PAX2,SIX2
GO: Biological Process	GO:0008284	positive regulation of cell population proliferation			4.629e-09	2.302e-05	1.265e-07	1.15e-06	50	1096	MYCN,SOX11,KDM5B,ETV5,HMGB2,NCAM1,MARCKSL1,EYA1,MDK,EZH2,TTK,CDC7,BLM,FZD7,SINHCAF,FBXO5,ASPM,KIF14,PLAG1,PRMT1,FGF8,NME1,FOXM1,TCF3,FZD3,BIRC5,CITED1,ODC1,PRC1,SIX1,SKP2,EDN3,CCNA2,CCNB1,TBC1D8,HMGA2,TIAM1,VASH2,PAX2,CDK1,PRKDC,HAS2,CDC6,CDC20,PRAME,SIX2,KDM1A,CDK2,HDAC2,MYB
GO: Biological Process	GO:0001501	skeletal system development			4.657e-09	2.317e-05	1.266e-07	1.151e-06	34	582	MYCN,SOX11,DLK1,EYA1,MDK,MEIS1,MEX3C,HOXA1,HOXA2,HOXA5,TYMS,HOXA6,HOXA7,HOXA10,HOXA11,HOXB9,HOXC4,HOXC6,CADM1,HOXD1,HOXD4,HOXD10,HOXD11,FGF8,FOXC1,COL2A1,COL13A1,NSD2,CHD7,SIX1,HMGA2,DLL3,HAS2,SIX2
GO: Biological Process	GO:0045892	negative regulation of transcription, DNA-templated			5.956e-09	2.962e-05	1.61e-07	1.463e-06	56	1316	SOX11,KDM5B,TGIF2,CENPF,PATZ1,ZNF423,BACH2,PEG3,DACH1,HMGB2,HIC2,BCL7A,BCOR,EZH2,CDC45,HOXA2,HOXA7,JARID2,CDK5R1,SALL2,SALL1,BRCA1,MACROH2A2,TIMELESS,FOXC1,FOXD1,DNMT3A,FOXM1,TCF3,NSD2,WT1,BIRC5,CITED1,DEPDC1,E2F5,SIX1,ATAD2,SUV39H2,GMNN,E2F8,CCNE1,HMGA2,HEY1,TLE1,TLE4,PAX2,PRAME,TCF7L1,SIX2,KDM1A,PCNA,CDK2,HDAC2,MYB,AURKB,HELLS
GO: Biological Process	GO:0001822	kidney development	1		6.128e-09	3.048e-05	1.648e-07	1.498e-06	24	314	SOX11,DLG5,CENPF,EYA1,HOXA11,SALL1,GPC3,HOXD11,FGF8,TIMELESS,NUP160,FOXC1,FOXD1,WT1,ITGA8,CITED1,ODC1,PPAT,SIX1,HEY1,LRP4,PAX2,HAS2,SIX2
GO: Biological Process	GO:0008608	attachment of spindle microtubules to kinetochore			6.48e-09	3.223e-05	1.733e-07	1.575e-06	9	33	CENPE,NEK2,NDC80,KIF2C,ECT2,SPAG5,CCNB1,RACGAP1,AURKB
GO: Biological Process	GO:0042127	regulation of cell population proliferation			6.722e-09	3.343e-05	1.788e-07	1.625e-06	72	1921	MYCN,SOX11,CDKN3,KDM5B,DLG5,PTTG1,BRIP1,ATP8A2,DACH1,ETV4,ETV5,HMGB2,NCAM1,DLK1,MARCKSL1,CHEK1,EYA1,MDK,EZH2,TTK,MEIS1,STAT4,CDC7,BLM,HOXA5,FZD7,JARID2,SINHCAF,SALL1,FBXO5,GPC3,BRCA1,ASPM,KIF14,PLAG1,PRMT1,FGF8,TIMELESS,NME1,FOXM1,TCF3,FZD3,RBBP4,WT1,BIRC5,FANCL,CITED1,ODC1,PRC1,SIX1,SKP2,EDN3,CCNA2,CCNB1,TBC1D8,HMGA2,TIAM1,HEY1,VASH2,ROBO1,PAX2,CDK1,PRKDC,HAS2,CDC6,CDC20,PRAME,SIX2,KDM1A,CDK2,HD…
GO: Biological Process	GO:0000910	cytokinesis			7.49e-09	3.725e-05	1.982e-07	1.801e-06	18	179	NUSAP1,CENPA,KIF4A,SEPTIN6,AURKA,KIF14,KIF23,BIRC5,STMN1,PRC1,ECT2,E2F8,CEP55,KIF20A,RACGAP1,CKAP2,CDC6,AURKB
GO: Biological Process	GO:0060562	epithelial tube morphogenesis			8.394e-09	4.175e-05	2.209e-07	2.008e-06	27	397	MYCN,SOX11,KDM5B,DLG5,ETV4,ETV5,EYA1,MDK,HOXA5,HOXA11,SALL1,GPC3,HOXD11,FGF8,TIMELESS,FOXD1,FZD3,WT1,CITED1,STIL,SIX1,HMGA2,HEY1,ROBO1,PAX2,FZD2,SIX2
GO: Biological Process	GO:0072080	nephron tubule development			8.491e-09	4.223e-05	2.223e-07	2.02e-06	14	104	EYA1,HOXA11,SALL1,GPC3,HOXD11,FGF8,TIMELESS,FOXD1,WT1,CITED1,SIX1,HEY1,PAX2,SIX2
GO: Biological Process	GO:0072009	nephron epithelium development			8.838e-09	4.396e-05	2.302e-07	2.092e-06	15	122	EYA1,HOXA11,SALL1,GPC3,HOXD11,FGF8,TIMELESS,FOXC1,FOXD1,WT1,CITED1,SIX1,HEY1,PAX2,SIX2
GO: Biological Process	GO:0042471	ear morphogenesis			9.117e-09	4.535e-05	2.362e-07	2.147e-06	16	141	ATP8A2,EYA1,HOXA1,HOXA2,SALL1,FGF8,COL2A1,CHRNA9,FZD3,SOBP,ITGA8,CHD7,SIX1,PAX2,FZD2,SIX2
GO: Biological Process	GO:0048666	neuron development			9.37e-09	4.661e-05	2.415e-07	2.195e-06	55	1297	DLG5,MAP2,ATP8A2,ETV1,ETV4,NCAM1,TUBB2B,DBN1,MDK,EZH2,CHN1,NREP,GFRA1,HOXA1,HOXA2,AURKA,CDK5R1,PTPRG,NRXN1,HOXD10,UCHL1,DHFR,SYT1,PRMT1,FGF8,ITM2C,NME1,WASF1,NPY,FOXD1,RANBP1,NPTX2,NRTN,FZD3,PPP1R9A,ENC1,DPYSL4,STMN1,INPP5F,CRABP2,EFNA4,TENM4,TIAM1,HEY1,SLIT1,UNC5C,AUTS2,LRP4,ROBO1,ELAVL4,PAX2,CDC20,FZD2,KDM1A,HDAC2
GO: Biological Process	GO:0071168	protein localization to chromatin			9.894e-09	4.921e-05	2.537e-07	2.306e-06	12	73	CENPN,CENPA,HJURP,NASP,OIP5,EZH2,MACROH2A2,RBBP4,MIS18A,CENPU,MSH2,CENPQ
GO: Biological Process	GO:0043044	ATP-dependent chromatin remodeling			1.059e-08	5.265e-05	2.7e-07	2.454e-06	13	89	CENPN,CENPA,HJURP,NASP,OIP5,ACTL6A,ANP32E,RBBP4,MIS18A,CENPU,CENPQ,SMARCC1,HDAC2
GO: Biological Process	GO:0051962	positive regulation of nervous system development			1.086e-08	5.403e-05	2.756e-07	2.505e-06	36	663	SOX11,DLG5,TGIF2,ATP8A2,WASF3,ETV5,TUBB2B,BRINP1,DBN1,MDK,EZH2,SALL1,NRXN1,ASPM,SYT1,PLAG1,NME1,RANBP1,TCF3,FZD3,PPP1R9A,SH3GL3,ENC1,CRABP2,ECT2,TENM4,TIAM1,DLL3,LRRTM2,ROBO1,ELAVL4,PAX2,CDC20,KDM1A,HDAC2,MYB
GO: Biological Process	GO:0060993	kidney morphogenesis			1.091e-08	5.429e-05	2.756e-07	2.505e-06	14	106	EYA1,HOXA11,SALL1,GPC3,HOXD11,FGF8,TIMELESS,FOXD1,WT1,CITED1,SIX1,HEY1,PAX2,SIX2
GO: Biological Process	GO:0007417	central nervous system development			1.215e-08	6.043e-05	3.052e-07	2.774e-06	50	1129	MYCN,SOX11,DLG5,MAP2,CENPF,WASF3,NCAM1,ACTL6A,MDK,RRM1,EZH2,HOXA1,HOXA2,JARID2,CDK5R1,SALL1,PTPRG,NRXN1,HOXD10,PGAP1,ASPM,KIF14,SYT1,FGF8,MACROH2A2,NNAT,NME1,NPY,FOXC1,COL2A1,FZD3,SH3GL3,ITGA8,CITED1,CHD7,STMN1,STIL,SIX1,HMGA2,TENM4,SLIT1,UNC5C,PAFAH1B3,DLL3,H2AX,ROBO1,PAX2,PRKDC,KDM1A,HDAC2
GO: Biological Process	GO:0061326	renal tubule development			1.395e-08	6.938e-05	3.486e-07	3.169e-06	14	108	EYA1,HOXA11,SALL1,GPC3,HOXD11,FGF8,TIMELESS,FOXD1,WT1,CITED1,SIX1,HEY1,PAX2,SIX2
GO: Biological Process	GO:0031055	chromatin remodeling at centromere			1.582e-08	7.87e-05	3.929e-07	3.571e-06	10	48	CENPN,CENPA,HJURP,NASP,OIP5,RBBP4,MIS18A,CENPU,CENPQ,HELLS
GO: Biological Process	GO:0000281	mitotic cytokinesis			1.588e-08	7.896e-05	3.929e-07	3.571e-06	12	76	NUSAP1,CENPA,KIF4A,SEPTIN6,KIF23,BIRC5,STMN1,ECT2,CEP55,KIF20A,RACGAP1,CKAP2
GO: Biological Process	GO:0090148	membrane fission			1.624e-08	8.078e-05	3.999e-07	3.635e-06	18	188	NUSAP1,CENPA,KIF4A,SEPTIN6,AURKA,KIF14,KIF23,BIRC5,STMN1,PRC1,ECT2,E2F8,CEP55,KIF20A,RACGAP1,CKAP2,CDC6,AURKB
GO: Biological Process	GO:0000723	telomere maintenance			1.634e-08	8.129e-05	4.004e-07	3.64e-06	17	167	BLM,NEK2,FEN1,DNA2,RAD51,POLE2,APEX1,RFC3,RFC4,CCNE1,CCNE2,PRIM1,PRIM2,EXO1,PRKDC,PCNA,AURKB
GO: Biological Process	GO:0061982	meiosis I cell cycle process			1.714e-08	8.527e-05	4.18e-07	3.799e-06	15	128	PTTG1,BRIP1,TRIP13,AURKA,CKS2,PTTG3P,FBXO5,RAD54B,RAD51,CCNE1,MSH6,CCNE2,CDC25A,CDC25C,TOP2A
GO: Biological Process	GO:0032201	telomere maintenance via semi-conservative replication			2.224e-08	0.0001106	5.396e-07	4.905e-06	8	27	FEN1,DNA2,POLE2,RFC3,RFC4,PRIM1,PRIM2,PCNA
GO: Biological Process	GO:0051225	spindle assembly			2.354e-08	0.0001171	5.684e-07	5.166e-06	15	131	KIF4A,AURKA,NEK2,FBXO5,ASPM,SAC3D1,KIF11,KIFC1,KIF23,BIRC5,SPAG5,TPX2,RACGAP1,CDC20,AURKB
GO: Biological Process	GO:0010720	positive regulation of cell development			2.503e-08	0.0001245	6e-07	5.453e-06	36	685	SOX11,DLG5,TGIF2,ATP8A2,ETV5,TUBB2B,BRINP1,DBN1,MDK,EZH2,AURKA,HOXA11,HOXC4,SALL1,HOXD11,ASPM,SYT1,PLAG1,NME1,RANBP1,TCF3,FZD3,PPP1R9A,SH3GL3,ENC1,CRABP2,ECT2,TENM4,TIAM1,DLL3,ROBO1,ELAVL4,HAS2,KDM1A,HDAC2,MYB
GO: Biological Process	GO:0060485	mesenchyme development			2.509e-08	0.0001248	6e-07	5.453e-06	23	312	SOX11,DLG5,MDK,EZH2,MEOX1,HOXA5,FGF8,FOXC1,FOXD1,NRTN,WT1,SIX1,EDN3,HMGA2,TIAM1,HEY1,DLL3,ROBO1,PAX2,HAS2,TMEM100,SIX2,HDAC2
GO: Biological Process	GO:0030030	cell projection organization			2.554e-08	0.000127	6.079e-07	5.525e-06	68	1827	DLG5,MAP2,MYO10,ATP8A2,LRRC49,WASF3,ETV1,ETV4,HMGB2,NCAM1,TUBB2B,CEP76,DBN1,MDK,EZH2,CHN1,NREP,GFRA1,SEPTIN6,HOXA1,HOXA2,AURKA,NEK2,CDK5R1,PTPRG,NRXN1,UCHL1,DHFR,SYT1,PRMT1,FGF8,ITM2C,NME1,WASF1,NPY,FOXD1,RANBP1,NPTX2,NRTN,FZD3,IFT81,PPP1R9A,ENC1,ITGA8,DPYSL4,E2F5,STMN1,STIL,INPP5F,CRABP2,TBC1D8,DNAAF2,EFNA4,TIAM1,HEY1,SLIT1,UNC5C,AUTS2,LRP4,ROBO1,ELAVL4,PAX2,CDK1,CDC20,PLK4,TOP2A,KDM1A,HDAC2
GO: Biological Process	GO:2000779	regulation of double-strand break repair			2.883e-08	0.0001434	6.829e-07	6.207e-06	12	80	CHEK1,BLM,AUNIP,TIMELESS,PARPBP,RAD51,FOXM1,NSD2,RAD51AP1,HMGA2,PRKDC,KDM1A
GO: Biological Process	GO:0006333	chromatin assembly or disassembly			3.365e-08	0.0001674	7.933e-07	7.211e-06	18	197	CENPN,CENPA,HJURP,NASP,MCM2,OIP5,HMGB2,H2AW,MACROH2A2,RBBP4,MIS18A,CENPU,SUV39H2,CENPQ,HMGA2,H2AX,SMARCC1,HELLS
GO: Biological Process	GO:0007276	gamete generation			3.423e-08	0.0001703	8.032e-07	7.3e-06	39	790	KIF18A,PTTG1,BRIP1,CLGN,PATZ1,ETV5,HMGB2,SRPK1,MDK,RPL39L,TRIP13,TTK,SEPTIN6,AURKA,HOXA10,HOXA11,HOXC4,CADM1,FBXO5,ASPM,HSF2,FOXC1,KIFC1,DNMT3A,IFT81,WT1,FANCL,MSH2,NCAPH,SUV39H2,CCNB1,HMGA2,ADGRG2,PAFAH1B3,H2AX,TMF1,RACGAP1,CDC25C,TOP2A
GO: Biological Process	GO:2000045	regulation of G1/S transition of mitotic cell cycle			3.64e-08	0.000181	8.499e-07	7.725e-06	18	198	EZH2,CDC45,AURKA,DBF4,KIF14,PRMT1,PCBP4,TCF3,APEX1,E2F8,CCNB1,CCNE1,CDK1,PRKDC,CDC6,CDC25C,PCNA,CDK2
GO: Biological Process	GO:0031145	anaphase-promoting complex-dependent catabolic process			3.834e-08	0.0001907	8.912e-07	8.1e-06	12	82	PTTG1,AURKA,FBXO5,BUB1B,UBE2S,UBE2C,CCNB1,CDK1,CDC20,MAD2L1,CDK2,AURKB
GO: Biological Process	GO:0051302	regulation of cell division			3.894e-08	0.0001937	9.01e-07	8.189e-06	17	177	ORC6,MDK,BLM,AURKA,HOXC4,ASPM,KIF14,FGF8,KIF23,PRC1,ECT2,E2F8,KIF20A,RACGAP1,CDC6,KIF18B,AURKB
GO: Biological Process	GO:0042770	signal transduction in response to DNA damage			3.917e-08	0.0001948	9.02e-07	8.199e-06	15	136	CHEK1,AURKA,BRCA1,PRMT1,PCBP4,FOXM1,DTL,E2F8,CCNB1,CDK1,PRKDC,CDC25C,KDM1A,PCNA,CDK2
GO: Biological Process	GO:0000083	regulation of transcription involved in G1/S transition of mitotic cell cycle			4.162e-08	0.000207	9.496e-07	8.631e-06	8	29	RRM2,CDC45,TYMS,FBXO5,DHFR,CCNE1,CDC6,PCNA
GO: Biological Process	GO:0010971	positive regulation of G2/M transition of mitotic cell cycle			4.162e-08	0.000207	9.496e-07	8.631e-06	8	29	CDC7,FBXO5,DTL,CCNB1,LMNB1,CDK1,CDC25A,CDC25C
GO: Biological Process	GO:0048609	multicellular organismal reproductive process			4.355e-08	0.0002166	9.892e-07	8.991e-06	44	965	KIF18A,PTTG1,BRIP1,CLGN,PATZ1,ETV5,HMGB2,SRPK1,BRINP1,MDK,RPL39L,TRIP13,TTK,SEPTIN6,AURKA,HOXA10,HOXA11,HOXC4,CADM1,FBXO5,ASPM,HSF2,FOXC1,KIFC1,DNMT3A,IFT81,WT1,FANCL,MSH2,PPAT,NCAPH,SUV39H2,CCNB1,HMGA2,ADGRG2,PAFAH1B3,H2AX,TMF1,RACGAP1,HAS2,CDC25C,TOP2A,PCNA,HDAC2
GO: Biological Process	GO:0036388	pre-replicative complex assembly			4.489e-08	0.0002233	1.006e-06	9.143e-06	5	7	MCM2,MCM3,MCM4,MCM6,MCM7
GO: Biological Process	GO:1902299	pre-replicative complex assembly involved in cell cycle DNA replication			4.489e-08	0.0002233	1.006e-06	9.143e-06	5	7	MCM2,MCM3,MCM4,MCM6,MCM7
GO: Biological Process	GO:0006267	pre-replicative complex assembly involved in nuclear cell cycle DNA replication			4.489e-08	0.0002233	1.006e-06	9.143e-06	5	7	MCM2,MCM3,MCM4,MCM6,MCM7
GO: Biological Process	GO:0019953	sexual reproduction			4.622e-08	0.0002299	1.031e-06	9.371e-06	44	967	KIF18A,KDM5B,PTTG1,BRIP1,CLGN,PATZ1,ETV5,HMGB2,SRPK1,MDK,RPL39L,TRIP13,TTK,SEPTIN6,AURKA,HOXA10,HOXA11,HOXC4,CADM1,FBXO5,HOXD10,HOXD11,ASPM,HSF2,FOXC1,KIFC1,DNMT3A,IFT81,WT1,FANCL,MSH2,NCAPH,SUV39H2,CCNB1,HMGA2,ADGRG2,PAFAH1B3,H2AX,TMF1,RACGAP1,CDK1,CDC25C,TOP2A,HDAC2
GO: Biological Process	GO:0032200	telomere organization			4.993e-08	0.0002484	1.109e-06	1.008e-05	17	180	BLM,NEK2,FEN1,DNA2,RAD51,POLE2,APEX1,RFC3,RFC4,CCNE1,CCNE2,PRIM1,PRIM2,EXO1,PRKDC,PCNA,AURKB
GO: Biological Process	GO:0071158	positive regulation of cell cycle arrest			5.057e-08	0.0002515	1.118e-06	1.016e-05	12	84	AURKA,CDK5R1,BRCA1,PRMT1,PCBP4,E2F8,CCNB1,HMGA2,CDK1,CDC25C,PCNA,CDK2
GO: Biological Process	GO:0070507	regulation of microtubule cytoskeleton organization			5.764e-08	0.0002867	1.269e-06	1.153e-05	18	204	KIF18A,MAP2,CEP76,CHEK1,AURKA,NEK2,CDK5R1,BRCA1,PSRC1,KIF11,RANBP1,RAE1,STMN1,STIL,SPAG5,TPX2,CKAP2,PLK4
GO: Biological Process	GO:0120036	plasma membrane bounded cell projection organization			5.975e-08	0.0002972	1.309e-06	1.19e-05	66	1789	DLG5,MAP2,MYO10,ATP8A2,LRRC49,WASF3,ETV1,ETV4,HMGB2,NCAM1,TUBB2B,CEP76,DBN1,MDK,EZH2,CHN1,NREP,GFRA1,SEPTIN6,HOXA1,HOXA2,AURKA,NEK2,CDK5R1,PTPRG,NRXN1,UCHL1,DHFR,SYT1,PRMT1,FGF8,ITM2C,NME1,WASF1,NPY,FOXD1,RANBP1,NPTX2,NRTN,FZD3,IFT81,PPP1R9A,ENC1,DPYSL4,STMN1,STIL,INPP5F,CRABP2,TBC1D8,DNAAF2,EFNA4,TIAM1,HEY1,SLIT1,UNC5C,AUTS2,LRP4,ROBO1,ELAVL4,PAX2,CDK1,CDC20,PLK4,TOP2A,KDM1A,HDAC2
GO: Biological Process	GO:0051988	regulation of attachment of spindle microtubules to kinetochore			6.237e-08	0.0003102	1.361e-06	1.237e-05	6	13	CENPE,NEK2,ECT2,SPAG5,CCNB1,RACGAP1
GO: Biological Process	GO:0044773	mitotic DNA damage checkpoint			6.369e-08	0.0003168	1.383e-06	1.257e-05	13	103	BLM,AURKA,PRMT1,PCBP4,MSH2,E2F8,CCNB1,HMGA2,CDK1,PRKDC,CDC25C,PCNA,CDK2
GO: Biological Process	GO:0016572	histone phosphorylation			6.459e-08	0.0003213	1.397e-06	1.27e-05	9	42	CHEK1,AURKA,VRK1,CCNA2,CCNB1,HMGA2,CDK1,CDK2,AURKB
GO: Biological Process	GO:0072006	nephron development			6.633e-08	0.0003299	1.428e-06	1.298e-05	16	162	EYA1,HOXA11,SALL1,GPC3,HOXD11,FGF8,TIMELESS,NUP160,FOXC1,FOXD1,WT1,CITED1,SIX1,HEY1,PAX2,SIX2
GO: Biological Process	GO:0032504	multicellular organism reproduction			6.772e-08	0.0003369	1.452e-06	1.32e-05	44	980	KIF18A,PTTG1,BRIP1,CLGN,PATZ1,ETV5,HMGB2,SRPK1,BRINP1,MDK,RPL39L,TRIP13,TTK,SEPTIN6,AURKA,HOXA10,HOXA11,HOXC4,CADM1,FBXO5,ASPM,HSF2,FOXC1,KIFC1,DNMT3A,IFT81,WT1,FANCL,MSH2,PPAT,NCAPH,SUV39H2,CCNB1,HMGA2,ADGRG2,PAFAH1B3,H2AX,TMF1,RACGAP1,HAS2,CDC25C,TOP2A,PCNA,HDAC2
GO: Biological Process	GO:0061640	cytoskeleton-dependent cytokinesis			7.157e-08	0.000356	1.528e-06	1.389e-05	13	104	NUSAP1,CENPA,KIF4A,SEPTIN6,KIF23,BIRC5,STMN1,ECT2,CEP55,KIF20A,RACGAP1,CKAP2,AURKB
GO: Biological Process	GO:0043583	ear development			8.052e-08	0.0004005	1.712e-06	1.556e-05	20	256	MYCN,ATP8A2,MCM2,EYA1,HOXA1,HOXA2,SALL1,FGF8,COL2A1,CHRNA9,FZD3,SOBP,ITGA8,CHD7,SIX1,CCNA2,HEY1,PAX2,FZD2,SIX2
GO: Biological Process	GO:1902751	positive regulation of cell cycle G2/M phase transition			9.712e-08	0.0004831	2.056e-06	1.868e-05	8	32	CDC7,FBXO5,DTL,CCNB1,LMNB1,CDK1,CDC25A,CDC25C
GO: Biological Process	GO:0061641	CENP-A containing chromatin organization			9.937e-08	0.0004943	2.077e-06	1.888e-05	9	44	CENPN,CENPA,HJURP,NASP,OIP5,RBBP4,MIS18A,CENPU,CENPQ
GO: Biological Process	GO:0061644	protein localization to CENP-A containing chromatin			9.937e-08	0.0004943	2.077e-06	1.888e-05	9	44	CENPN,CENPA,HJURP,NASP,OIP5,RBBP4,MIS18A,CENPU,CENPQ
GO: Biological Process	GO:0034080	CENP-A containing nucleosome assembly			9.937e-08	0.0004943	2.077e-06	1.888e-05	9	44	CENPN,CENPA,HJURP,NASP,OIP5,RBBP4,MIS18A,CENPU,CENPQ
GO: Biological Process	GO:1902400	intracellular signal transduction involved in G1 DNA damage checkpoint			1.069e-07	0.0005319	2.216e-06	2.014e-05	10	58	AURKA,PRMT1,PCBP4,E2F8,CCNB1,CDK1,PRKDC,CDC25C,PCNA,CDK2
GO: Biological Process	GO:0072431	signal transduction involved in mitotic G1 DNA damage checkpoint			1.069e-07	0.0005319	2.216e-06	2.014e-05	10	58	AURKA,PRMT1,PCBP4,E2F8,CCNB1,CDK1,PRKDC,CDC25C,PCNA,CDK2
GO: Biological Process	GO:0006268	DNA unwinding involved in DNA replication			1.074e-07	0.0005344	2.217e-06	2.015e-05	6	14	MCM2,MCM4,MCM6,MCM7,BLM,RAD51
GO: Biological Process	GO:0051054	positive regulation of DNA metabolic process			1.195e-07	0.0005943	2.456e-06	2.232e-05	18	214	EYA1,BLM,NEK2,BRCA1,TIMELESS,DSCC1,RAD51,FOXM1,NSD2,WT1,MSH2,RFC3,RFC4,H2AX,PRKDC,PCNA,CDK2,AURKB
GO: Biological Process	GO:2000027	regulation of animal organ morphogenesis			1.308e-07	0.0006507	2.678e-06	2.434e-05	21	289	ETV5,EYA1,BCOR,MDK,FZD7,HOXA11,SALL1,GPC3,HOXD11,FGF8,FOXC1,FZD3,WT1,CITED1,SIX1,HMGA2,TIAM1,ROBO1,PAX2,FZD2,SIX2
GO: Biological Process	GO:0003006	developmental process involved in reproduction			1.441e-07	0.0007168	2.938e-06	2.67e-05	38	801	KIF18A,KDM5B,BRIP1,PATZ1,PEG10,DACH1,NASP,ETV5,HMGB2,SRPK1,MDK,RRM1,TRIP13,AURKA,HOXA10,HOXA11,NELL2,HOXC4,SALL1,FBXO5,ASPM,PLAG1,FGF8,FOXC1,WT1,CITED1,CHD7,MSH2,E2F8,CCNB1,HMGA2,HEY1,VASH2,TMF1,SMARCC1,PAX2,PRKDC,PLK4
GO: Biological Process	GO:1902402	signal transduction involved in mitotic DNA damage checkpoint			1.495e-07	0.0007435	3.01e-06	2.736e-05	10	60	AURKA,PRMT1,PCBP4,E2F8,CCNB1,CDK1,PRKDC,CDC25C,PCNA,CDK2
GO: Biological Process	GO:1902403	signal transduction involved in mitotic DNA integrity checkpoint			1.495e-07	0.0007435	3.01e-06	2.736e-05	10	60	AURKA,PRMT1,PCBP4,E2F8,CCNB1,CDK1,PRKDC,CDC25C,PCNA,CDK2
GO: Biological Process	GO:0072413	signal transduction involved in mitotic cell cycle checkpoint			1.495e-07	0.0007435	3.01e-06	2.736e-05	10	60	AURKA,PRMT1,PCBP4,E2F8,CCNB1,CDK1,PRKDC,CDC25C,PCNA,CDK2
GO: Biological Process	GO:1902806	regulation of cell cycle G1/S phase transition			1.692e-07	0.0008418	3.394e-06	3.085e-05	18	219	EZH2,CDC45,AURKA,DBF4,KIF14,PRMT1,PCBP4,TCF3,APEX1,E2F8,CCNB1,CCNE1,CDK1,PRKDC,CDC6,CDC25C,PCNA,CDK2
GO: Biological Process	GO:0071156	regulation of cell cycle arrest			1.738e-07	0.0008644	3.472e-06	3.155e-05	13	112	AURKA,CDK5R1,BRCA1,PRMT1,PCBP4,FOXM1,E2F8,CCNB1,HMGA2,CDK1,CDC25C,PCNA,CDK2
GO: Biological Process	GO:0043486	histone exchange			1.758e-07	0.0008747	3.499e-06	3.18e-05	10	61	CENPN,CENPA,HJURP,NASP,OIP5,ANP32E,RBBP4,MIS18A,CENPU,CENPQ
GO: Biological Process	GO:0030261	chromosome condensation			1.818e-07	0.0009043	3.603e-06	3.275e-05	9	47	NUSAP1,NCAPG,NCAPD2,SMC4,NCAPH,CCNB1,HMGA2,CDK1,TOP2A
GO: Biological Process	GO:0061564	axon development			1.898e-07	0.000944	3.746e-06	3.405e-05	31	583	MAP2,ATP8A2,ETV1,ETV4,NCAM1,TUBB2B,DBN1,CHN1,NREP,GFRA1,HOXA1,HOXA2,CDK5R1,NRXN1,UCHL1,DHFR,FGF8,FOXD1,NRTN,FZD3,STMN1,INPP5F,CRABP2,EFNA4,TIAM1,SLIT1,UNC5C,AUTS2,LRP4,ROBO1,PAX2
GO: Biological Process	GO:0090307	mitotic spindle assembly			2.062e-07	0.001026	4.038e-06	3.67e-05	10	62	KIF4A,NEK2,KIF11,KIFC1,KIF23,BIRC5,TPX2,RACGAP1,CDC20,AURKB
GO: Biological Process	GO:0001207	histone displacement			2.062e-07	0.001026	4.038e-06	3.67e-05	10	62	CENPN,CENPA,HJURP,NASP,OIP5,ANP32E,RBBP4,MIS18A,CENPU,CENPQ
GO: Biological Process	GO:0060322	head development			2.364e-07	0.001176	4.612e-06	4.192e-05	40	885	DLG5,CENPF,NCAM1,PFAS,MDK,RRM1,EZH2,HOXA1,HOXA2,CDK5R1,SALL1,PTPRG,NRXN1,PGAP1,ASPM,KIF14,SYT1,FGF8,MACROH2A2,NNAT,NME1,NPY,FOXC1,COL2A1,FZD3,ITGA8,CITED1,CHD7,STMN1,STIL,HMGA2,SLIT1,UNC5C,PAFAH1B3,H2AX,ROBO1,PAX2,PRKDC,KDM1A,HDAC2
GO: Biological Process	GO:0022403	cell cycle phase			2.415e-07	0.001201	4.691e-06	4.264e-05	14	135	PTTG1,BRIP1,TRIP13,TTK,AURKA,CKS2,PTTG3P,FBXO5,RAD54B,RAD51,CCNE1,CCNE2,CDC20,TOP2A
GO: Biological Process	GO:0050769	positive regulation of neurogenesis			2.556e-07	0.001271	4.947e-06	4.497e-05	31	591	SOX11,DLG5,TGIF2,ATP8A2,ETV5,TUBB2B,BRINP1,DBN1,MDK,EZH2,SALL1,ASPM,SYT1,PLAG1,NME1,RANBP1,TCF3,FZD3,PPP1R9A,SH3GL3,ENC1,CRABP2,ECT2,TENM4,TIAM1,DLL3,ROBO1,ELAVL4,KDM1A,HDAC2,MYB
GO: Biological Process	GO:0000022	mitotic spindle elongation			2.612e-07	0.001299	5.035e-06	4.576e-05	5	9	KIF4A,KIF23,PRC1,RACGAP1,AURKB
GO: Biological Process	GO:0072073	kidney epithelium development			2.645e-07	0.001316	5.08e-06	4.617e-05	15	157	EYA1,HOXA11,SALL1,GPC3,HOXD11,FGF8,TIMELESS,FOXC1,FOXD1,WT1,CITED1,SIX1,HEY1,PAX2,SIX2
GO: Biological Process	GO:0045597	positive regulation of cell differentiation			2.859e-07	0.001422	5.469e-06	4.971e-05	48	1176	SOX11,DLG5,TGIF2,ATP8A2,ETV5,HMGB2,TUBB2B,BRINP1,DBN1,MDK,EZH2,HOXA5,AURKA,HOXA11,HOXC4,SALL1,FBXO5,HOXD11,ASPM,SYT1,PLAG1,PRMT1,FGF8,MACROH2A2,NME1,FOXC1,RANBP1,TCF3,FZD3,PPP1R9A,SH3GL3,ENC1,CRABP2,ECT2,EDN3,CCNE1,TENM4,TIAM1,HEY1,DLL3,ROBO1,ELAVL4,PAX2,HAS2,TMEM100,KDM1A,HDAC2,MYB
GO: Biological Process	GO:2001020	regulation of response to DNA damage stimulus			3.088e-07	0.001536	5.885e-06	5.349e-05	18	228	CHEK1,EYA1,BLM,AUNIP,FBXO5,BRCA1,TIMELESS,PARPBP,PCBP4,RAD51,FOXM1,NSD2,RAD51AP1,HMGA2,H2AX,PRKDC,KDM1A,PCNA
GO: Biological Process	GO:0042472	inner ear morphogenesis			3.217e-07	0.0016	6.108e-06	5.552e-05	13	118	ATP8A2,EYA1,HOXA1,FGF8,COL2A1,CHRNA9,FZD3,SOBP,ITGA8,CHD7,SIX1,PAX2,FZD2
GO: Biological Process	GO:0031571	mitotic G1 DNA damage checkpoint			3.267e-07	0.001625	6.155e-06	5.595e-05	10	65	AURKA,PRMT1,PCBP4,E2F8,CCNB1,CDK1,PRKDC,CDC25C,PCNA,CDK2
GO: Biological Process	GO:0044819	mitotic G1/S transition checkpoint			3.267e-07	0.001625	6.155e-06	5.595e-05	10	65	AURKA,PRMT1,PCBP4,E2F8,CCNB1,CDK1,PRKDC,CDC25C,PCNA,CDK2
GO: Biological Process	GO:0009314	response to radiation			3.414e-07	0.001698	6.409e-06	5.825e-05	28	506	PCLAF,ATP8A2,PBK,CHEK1,EYA1,RRM1,NMU,HOXA1,BLM,H2AW,BRCA1,RAD54B,FEN1,DNMT3A,RAD51,DTL,MSH2,ECT2,RAD51AP1,MSH6,HMGA2,ASNS,H2AX,PRKDC,CDC25A,KDM1A,PCNA,AURKB
GO: Biological Process	GO:0048858	cell projection morphogenesis			3.46e-07	0.001721	6.47e-06	5.881e-05	36	762	MAP2,ATP8A2,ETV1,ETV4,NCAM1,TUBB2B,DBN1,MDK,CHN1,GFRA1,HOXA1,HOXA2,AURKA,CDK5R1,NRXN1,UCHL1,SYT1,FGF8,WASF1,FOXD1,NRTN,FZD3,PPP1R9A,DPYSL4,STMN1,CRABP2,EFNA4,TIAM1,SLIT1,UNC5C,AUTS2,LRP4,ROBO1,ELAVL4,PAX2,KDM1A
GO: Biological Process	GO:0007420	brain development			3.516e-07	0.001749	6.551e-06	5.954e-05	38	830	DLG5,CENPF,NCAM1,MDK,RRM1,EZH2,HOXA1,HOXA2,CDK5R1,SALL1,PTPRG,NRXN1,PGAP1,ASPM,KIF14,SYT1,FGF8,MACROH2A2,NNAT,NME1,NPY,FOXC1,FZD3,ITGA8,CITED1,CHD7,STMN1,STIL,HMGA2,SLIT1,UNC5C,PAFAH1B3,H2AX,ROBO1,PAX2,PRKDC,KDM1A,HDAC2
GO: Biological Process	GO:0045132	meiotic chromosome segregation			3.596e-07	0.001789	6.675e-06	6.067e-05	12	100	PTTG1,BRIP1,TRIP13,TTK,PTTG3P,BUB1,BUB1B,SMC4,NCAPH,CCNE1,CCNE2,TOP2A
GO: Biological Process	GO:0044783	G1 DNA damage checkpoint			3.787e-07	0.001884	7.003e-06	6.365e-05	10	66	AURKA,PRMT1,PCBP4,E2F8,CCNB1,CDK1,PRKDC,CDC25C,PCNA,CDK2
GO: Biological Process	GO:0034501	protein localization to kinetochore			4.222e-07	0.0021	7.778e-06	7.07e-05	6	17	TTK,SPDL1,NDC80,CENPQ,CDK1,AURKB
GO: Biological Process	GO:0016569	covalent chromatin modification			4.328e-07	0.002153	7.944e-06	7.22e-05	28	512	KDM5B,ACTL6A,CHEK1,EYA1,BCOR,EZH2,AURKA,JARID2,BRCA1,PRMT1,TAF5,DNMT3A,TCF3,VRK1,NSD2,SUV39H2,CCNA2,CCNB1,YEATS4,HMGA2,AUTS2,CDK1,KDM1A,CDK2,HDAC2,MYB,AURKB,HELLS
GO: Biological Process	GO:0034728	nucleosome organization			4.798e-07	0.002386	8.774e-06	7.975e-05	16	187	CENPN,CENPA,HJURP,NASP,MCM2,OIP5,HMGB2,H2AW,ANP32E,MACROH2A2,RBBP4,MIS18A,CENPU,CENPQ,H2AX,SMARCC1
GO: Biological Process	GO:0051231	spindle elongation			5.143e-07	0.002558	9.371e-06	8.518e-05	5	10	KIF4A,KIF23,PRC1,RACGAP1,AURKB
GO: Biological Process	GO:0048812	neuron projection morphogenesis			5.27e-07	0.002621	9.566e-06	8.695e-05	35	742	MAP2,ATP8A2,ETV1,ETV4,NCAM1,TUBB2B,DBN1,CHN1,GFRA1,HOXA1,HOXA2,AURKA,CDK5R1,NRXN1,UCHL1,SYT1,FGF8,WASF1,FOXD1,NRTN,FZD3,PPP1R9A,DPYSL4,STMN1,CRABP2,EFNA4,TIAM1,SLIT1,UNC5C,AUTS2,LRP4,ROBO1,ELAVL4,PAX2,KDM1A
GO: Biological Process	GO:0006336	DNA replication-independent nucleosome assembly			6.324e-07	0.003145	1.144e-05	0.000104	9	54	CENPN,CENPA,HJURP,NASP,OIP5,RBBP4,MIS18A,CENPU,CENPQ
GO: Biological Process	GO:0032990	cell part morphogenesis			6.402e-07	0.003184	1.154e-05	0.0001049	36	782	MAP2,ATP8A2,ETV1,ETV4,NCAM1,TUBB2B,DBN1,MDK,CHN1,GFRA1,HOXA1,HOXA2,AURKA,CDK5R1,NRXN1,UCHL1,SYT1,FGF8,WASF1,FOXD1,NRTN,FZD3,PPP1R9A,DPYSL4,STMN1,CRABP2,EFNA4,TIAM1,SLIT1,UNC5C,AUTS2,LRP4,ROBO1,ELAVL4,PAX2,KDM1A
GO: Biological Process	GO:0032886	regulation of microtubule-based process			6.572e-07	0.003269	1.18e-05	0.0001073	18	240	KIF18A,MAP2,CEP76,CHEK1,AURKA,NEK2,CDK5R1,BRCA1,PSRC1,KIF11,RANBP1,RAE1,STMN1,STIL,SPAG5,TPX2,CKAP2,PLK4
GO: Biological Process	GO:0031497	chromatin assembly			6.859e-07	0.003411	1.227e-05	0.0001115	15	169	CENPN,CENPA,HJURP,NASP,MCM2,OIP5,HMGB2,MACROH2A2,RBBP4,MIS18A,CENPU,CENPQ,HMGA2,H2AX,HELLS
GO: Biological Process	GO:0034724	DNA replication-independent nucleosome organization			7.438e-07	0.003699	1.326e-05	0.0001205	9	55	CENPN,CENPA,HJURP,NASP,OIP5,RBBP4,MIS18A,CENPU,CENPQ
GO: Biological Process	GO:0098762	meiotic cell cycle phase			7.563e-07	0.003762	1.339e-05	0.0001217	13	127	PTTG1,BRIP1,TRIP13,TTK,AURKA,CKS2,PTTG3P,FBXO5,RAD54B,RAD51,CCNE1,CCNE2,TOP2A
GO: Biological Process	GO:0098764	meiosis I cell cycle phase			7.563e-07	0.003762	1.339e-05	0.0001217	13	127	PTTG1,BRIP1,TRIP13,TTK,AURKA,CKS2,PTTG3P,FBXO5,RAD54B,RAD51,CCNE1,CCNE2,TOP2A
GO: Biological Process	GO:0070192	chromosome organization involved in meiotic cell cycle			7.63e-07	0.003795	1.346e-05	0.0001223	10	71	BRIP1,TRIP13,BUB1,BUB1B,NCAPD2,RAD51,SMC4,NCAPH,CCNE1,CCNE2
GO: Biological Process	GO:0007098	centrosome cycle			8.278e-07	0.004118	1.45e-05	0.0001318	13	128	PCLAF,CEP76,CHEK1,AURKA,NEK2,BRCA1,SAC3D1,KIF11,RANBP1,STIL,CDK1,PLK4,CDK2
GO: Biological Process	GO:0000279	M phase			8.278e-07	0.004118	1.45e-05	0.0001318	13	128	PTTG1,BRIP1,TRIP13,AURKA,CKS2,PTTG3P,FBXO5,RAD54B,RAD51,CCNE1,CCNE2,CDC20,TOP2A
GO: Biological Process	GO:0120039	plasma membrane bounded cell projection morphogenesis			8.367e-07	0.004162	1.46e-05	0.0001327	35	757	MAP2,ATP8A2,ETV1,ETV4,NCAM1,TUBB2B,DBN1,CHN1,GFRA1,HOXA1,HOXA2,AURKA,CDK5R1,NRXN1,UCHL1,SYT1,FGF8,WASF1,FOXD1,NRTN,FZD3,PPP1R9A,DPYSL4,STMN1,CRABP2,EFNA4,TIAM1,SLIT1,UNC5C,AUTS2,LRP4,ROBO1,ELAVL4,PAX2,KDM1A
GO: Biological Process	GO:0048705	skeletal system morphogenesis			8.483e-07	0.004219	1.475e-05	0.0001341	19	270	MYCN,SOX11,EYA1,HOXA1,HOXA2,HOXA5,HOXA6,HOXA7,HOXA11,HOXC4,HOXD4,HOXD10,HOXD11,FOXC1,COL2A1,COL13A1,SIX1,HAS2,SIX2
GO: Biological Process	GO:0006977	DNA damage response, signal transduction by p53 class mediator resulting in cell cycle arrest			1.018e-06	0.005065	1.76e-05	0.0001599	9	57	AURKA,PRMT1,PCBP4,E2F8,CCNB1,CDK1,CDC25C,PCNA,CDK2
GO: Biological Process	GO:0030330	DNA damage response, signal transduction by p53 class mediator			1.019e-06	0.005068	1.76e-05	0.0001599	12	110	AURKA,BRCA1,PRMT1,PCBP4,FOXM1,E2F8,CCNB1,CDK1,CDC25C,KDM1A,PCNA,CDK2
GO: Biological Process	GO:0007409	axonogenesis			1.074e-06	0.005341	1.848e-05	0.000168	28	536	MAP2,ATP8A2,ETV1,ETV4,NCAM1,TUBB2B,DBN1,CHN1,GFRA1,HOXA1,HOXA2,CDK5R1,NRXN1,UCHL1,FGF8,FOXD1,NRTN,FZD3,STMN1,CRABP2,EFNA4,TIAM1,SLIT1,UNC5C,AUTS2,LRP4,ROBO1,PAX2
GO: Biological Process	GO:0051640	organelle localization			1.218e-06	0.00606	2.09e-05	0.0001899	40	944	NUSAP1,KIF18A,CENPA,MAP2,CENPE,CENPF,LRRC49,DLGAP5,NCAM1,CEP76,EYA1,SEPTIN6,SPDL1,AURKA,NEK2,NRXN1,NDC80,UCHL1,ASPM,KIF14,SYT1,WASF1,PSRC1,KIFC1,KIF2C,KIF23,IFT81,BIRC5,STIL,CDCA8,SPAG5,CCNB1,CEP55,CENPQ,TBC1D8,DNAAF2,SLIT1,CDK1,PLK4,MAD2L1
GO: Biological Process	GO:0048839	inner ear development			1.291e-06	0.006422	2.207e-05	0.0002006	17	226	MYCN,ATP8A2,MCM2,EYA1,HOXA1,FGF8,COL2A1,CHRNA9,FZD3,SOBP,ITGA8,CHD7,SIX1,CCNA2,HEY1,PAX2,FZD2
GO: Biological Process	GO:0035404	histone-serine phosphorylation			1.567e-06	0.007796	2.67e-05	0.0002427	5	12	AURKA,VRK1,CCNB1,HMGA2,AURKB
GO: Biological Process	GO:0060231	mesenchymal to epithelial transition	1		1.738e-06	0.008644	2.94e-05	0.0002672	6	21	FZD7,SALL1,WT1,CITED1,PAX2,SIX2
GO: Biological Process	GO:0051383	kinetochore organization			1.738e-06	0.008644	2.94e-05	0.0002672	6	21	CENPN,CENPA,CENPE,CENPF,NDC80,SMC4
GO: Biological Process	GO:0009798	axis specification			1.764e-06	0.008776	2.975e-05	0.0002704	11	96	BCOR,AURKA,GPC3,PGAP1,WT1,CITED1,STIL,HEY1,CXXC4,TCF7L1,SIX2
GO: Biological Process	GO:0031023	microtubule organizing center organization			1.797e-06	0.008939	3.02e-05	0.0002745	13	137	PCLAF,CEP76,CHEK1,AURKA,NEK2,BRCA1,SAC3D1,KIF11,RANBP1,STIL,CDK1,PLK4,CDK2
GO: Biological Process	GO:0046605	regulation of centrosome cycle			1.838e-06	0.009143	3.068e-05	0.0002789	9	61	CEP76,CHEK1,AURKA,NEK2,BRCA1,KIF11,RANBP1,STIL,PLK4
GO: Biological Process	GO:0045840	positive regulation of mitotic nuclear division			1.838e-06	0.009143	3.068e-05	0.0002789	9	61	NUSAP1,CENPE,DLGAP5,AURKA,FGF8,RANBP1,UBE2C,BIRC5,EDN3
GO: Biological Process	GO:0051785	positive regulation of nuclear division			1.852e-06	0.009211	3.081e-05	0.00028	10	78	NUSAP1,CENPE,DLGAP5,AURKA,FBXO5,FGF8,RANBP1,UBE2C,BIRC5,EDN3
GO: Biological Process	GO:0044848	biological phase			1.914e-06	0.009519	3.163e-05	0.0002875	14	160	PTTG1,BRIP1,TRIP13,TTK,AURKA,CKS2,PTTG3P,FBXO5,RAD54B,RAD51,CCNE1,CCNE2,CDC20,TOP2A
GO: Biological Process	GO:0010212	response to ionizing radiation			1.914e-06	0.009519	3.163e-05	0.0002875	14	160	EYA1,RRM1,BLM,BRCA1,RAD54B,DNMT3A,RAD51,MSH2,ECT2,RAD51AP1,HMGA2,H2AX,PRKDC,KDM1A
GO: Biological Process	GO:0016570	histone modification			2.048e-06	0.01019	3.373e-05	0.0003066	26	491	KDM5B,ACTL6A,CHEK1,EYA1,BCOR,EZH2,AURKA,JARID2,BRCA1,PRMT1,TAF5,TCF3,VRK1,NSD2,SUV39H2,CCNA2,CCNB1,YEATS4,HMGA2,AUTS2,CDK1,KDM1A,CDK2,HDAC2,MYB,AURKB
GO: Biological Process	GO:0045737	positive regulation of cyclin-dependent protein serine/threonine kinase activity			2.096e-06	0.01043	3.441e-05	0.0003128	7	33	CKS1B,CKS2,CDK5R1,PSRC1,STIL,CCNB1,CDC6
GO: Biological Process	GO:0048729	tissue morphogenesis			2.207e-06	0.01098	3.612e-05	0.0003283	37	860	MYCN,SOX11,KDM5B,DLG5,TGIF2,ETV4,ETV5,EYA1,MDK,HOXA5,FZD7,HOXA11,SALL1,GPC3,HOXD11,FGF8,TIMELESS,FOXC1,FOXD1,TCF3,FZD3,WT1,ITGA8,CITED1,CHD7,STIL,SIX1,HMGA2,TENM4,TIAM1,HEY1,ROBO1,PAX2,FZD2,TMEM100,TCF7L1,SIX2
GO: Biological Process	GO:0044703	multi-organism reproductive process			2.435e-06	0.01211	3.971e-05	0.000361	45	1155	KIF18A,KDM5B,PTTG1,BRIP1,CLGN,PATZ1,ETV5,HMGB2,SRPK1,MDK,RPL39L,TRIP13,TTK,SEPTIN6,AURKA,HOXA10,HOXA11,HOXC4,CADM1,FBXO5,HOXD10,HOXD11,ASPM,HSF2,FOXC1,KIFC1,DNMT3A,IFT81,WT1,FANCL,MSH2,PPAT,NCAPH,SUV39H2,CCNB1,HMGA2,ADGRG2,PAFAH1B3,H2AX,TMF1,RACGAP1,CDK1,CDC25C,TOP2A,HDAC2
GO: Biological Process	GO:0051338	regulation of transferase activity			2.964e-06	0.01474	4.818e-05	0.000438	43	1089	CDKN3,CENPE,EZH2,ADCY2,BLM,CKS1B,CKS2,NEK2,CDK5R1,FBXO5,NRXN1,DBF4,UCHL1,KIF14,UBE2S,DSCC1,PSRC1,TCF3,PPP1R9A,UBE2C,CCNJ,STIL,RFC3,RFC4,ECT2,EDN3,CCNA2,CCNB1,CCNE1,HMGA2,TIAM1,CCNB2,CCNE2,TPX2,FZD10,ROBO1,CDK1,CDC6,CDC20,CDC25A,CDC25C,MAD2L1,AURKB
GO: Biological Process	GO:0048232	male gamete generation			3.219e-06	0.01601	5.199e-05	0.0004725	30	633	KIF18A,PTTG1,BRIP1,CLGN,PATZ1,ETV5,HMGB2,SRPK1,RPL39L,TRIP13,SEPTIN6,HOXA10,HOXA11,HOXC4,CADM1,ASPM,HSF2,KIFC1,DNMT3A,IFT81,WT1,SUV39H2,CCNB1,HMGA2,ADGRG2,PAFAH1B3,H2AX,TMF1,RACGAP1,CDC25C
GO: Biological Process	GO:0007423	sensory organ development			3.219e-06	0.01601	5.199e-05	0.0004725	30	633	MYCN,SOX11,KDM5B,TGIF2,ATP8A2,MCM2,ACTL6A,EYA1,RRM1,MEIS1,HOXA1,HOXA2,SALL2,SALL1,FGF8,FOXC1,COL2A1,CHRNA9,FZD3,SOBP,WT1,ITGA8,CHD7,SIX1,CCNA2,HEY1,PAX2,FZD2,SIX2,HDAC2
GO: Biological Process	GO:0051656	establishment of organelle localization			3.252e-06	0.01617	5.234e-05	0.0004758	35	804	NUSAP1,KIF18A,CENPA,MAP2,CENPE,CENPF,LRRC49,DLGAP5,CEP76,EYA1,SEPTIN6,SPDL1,NEK2,NDC80,UCHL1,KIF14,WASF1,PSRC1,KIFC1,KIF2C,KIF23,IFT81,BIRC5,STIL,CDCA8,SPAG5,CCNB1,CEP55,CENPQ,TBC1D8,DNAAF2,SLIT1,CDK1,PLK4,MAD2L1
GO: Biological Process	GO:0051326	telophase			3.353e-06	0.01668	5.345e-05	0.0004859	12	123	PTTG1,BRIP1,TRIP13,AURKA,CKS2,PTTG3P,FBXO5,RAD54B,RAD51,CCNE1,CCNE2,TOP2A
GO: Biological Process	GO:0007134	meiotic telophase I			3.353e-06	0.01668	5.345e-05	0.0004859	12	123	PTTG1,BRIP1,TRIP13,AURKA,CKS2,PTTG3P,FBXO5,RAD54B,RAD51,CCNE1,CCNE2,TOP2A
GO: Biological Process	GO:0007127	meiosis I			3.353e-06	0.01668	5.345e-05	0.0004859	12	123	PTTG1,BRIP1,TRIP13,AURKA,CKS2,PTTG3P,FBXO5,RAD54B,RAD51,CCNE1,CCNE2,TOP2A
GO: Biological Process	GO:0007050	cell cycle arrest			3.671e-06	0.01826	5.833e-05	0.0005302	17	244	CDKN3,BARD1,BRINP1,AURKA,CDK5R1,BRCA1,PRMT1,PCBP4,FOXM1,MSH2,E2F8,CCNB1,HMGA2,CDK1,CDC25C,PCNA,CDK2
GO: Biological Process	GO:0007100	mitotic centrosome separation			3.842e-06	0.01911	6.085e-05	0.0005531	5	14	CHEK1,AURKA,NEK2,KIF11,RANBP1
GO: Biological Process	GO:0006334	nucleosome assembly			3.957e-06	0.01968	6.249e-05	0.000568	13	147	CENPN,CENPA,HJURP,NASP,MCM2,OIP5,HMGB2,MACROH2A2,RBBP4,MIS18A,CENPU,CENPQ,H2AX
GO: Biological Process	GO:0051256	mitotic spindle midzone assembly			3.997e-06	0.01988	6.291e-05	0.0005718	4	7	KIF4A,KIF23,RACGAP1,AURKB
GO: Biological Process	GO:0000902	cell morphogenesis			4.078e-06	0.02028	6.398e-05	0.0005815	45	1178	MAP2,MYO10,ATP8A2,WASF3,ETV1,ETV4,NCAM1,TUBB2B,DBN1,MDK,CHN1,GFRA1,HOXA1,HOXA2,FZD7,AURKA,CDK5R1,CADM1,NRXN1,UCHL1,KIF14,SYT1,FGF8,WASF1,FOXD1,NRTN,FZD3,PPP1R9A,ITGA8,DPYSL4,STMN1,CRABP2,ECT2,EFNA4,TIAM1,SLIT1,UNC5C,AUTS2,LRP4,ROBO1,ELAVL4,PAX2,HAS2,CDH7,KDM1A
GO: Biological Process	GO:0051653	spindle localization			4.315e-06	0.02146	6.749e-05	0.0006134	8	51	NUSAP1,CENPA,EYA1,SPDL1,NDC80,ASPM,SPAG5,MAD2L1
GO: Biological Process	GO:0032989	cellular component morphogenesis			4.391e-06	0.02184	6.847e-05	0.0006223	48	1296	MAP2,MYO10,ATP8A2,WASF3,ETV1,ETV4,NCAM1,TUBB2B,DBN1,MDK,CHN1,GFRA1,HOXA1,HOXA2,FZD7,AURKA,CDK5R1,CADM1,NRXN1,UCHL1,KIF14,SYT1,FGF8,WASF1,FOXD1,NRTN,FZD3,PPP1R9A,ITGA8,DPYSL4,STMN1,CRABP2,ECT2,EFNA4,TENM4,TIAM1,SLIT1,UNC5C,AUTS2,LRP4,TMF1,ROBO1,ELAVL4,PAX2,HAS2,CDH7,KDM1A,HDAC2
GO: Biological Process	GO:1904031	positive regulation of cyclin-dependent protein kinase activity			4.737e-06	0.02356	7.363e-05	0.0006693	7	37	CKS1B,CKS2,CDK5R1,PSRC1,STIL,CCNB1,CDC6
GO: Biological Process	GO:0006301	postreplication repair			5.017e-06	0.02496	7.774e-05	0.0007066	8	52	PCLAF,BRCA1,POLE2,DTL,MSH2,RFC3,RFC4,PCNA
GO: Biological Process	GO:0048608	reproductive structure development			5.21e-06	0.02592	8.049e-05	0.0007316	26	517	KIF18A,KDM5B,BRIP1,PATZ1,PEG10,NASP,HMGB2,RRM1,HOXA10,HOXA11,SALL1,ASPM,PLAG1,FGF8,FOXC1,WT1,CITED1,CHD7,MSH2,E2F8,HMGA2,HEY1,VASH2,TMF1,SMARCC1,PLK4
GO: Biological Process	GO:0035107	appendage morphogenesis			5.491e-06	0.02731	8.429e-05	0.0007662	14	175	MYCN,SOX11,HOXA10,HOXA11,SALL1,GPC3,HOXD10,HOXD11,FGF8,COL2A1,CHD7,CRABP2,LRP4,HDAC2
GO: Biological Process	GO:0035108	limb morphogenesis			5.491e-06	0.02731	8.429e-05	0.0007662	14	175	MYCN,SOX11,HOXA10,HOXA11,SALL1,GPC3,HOXD10,HOXD11,FGF8,COL2A1,CHD7,CRABP2,LRP4,HDAC2
GO: Biological Process	GO:0051299	centrosome separation			5.674e-06	0.02822	8.684e-05	0.0007893	5	15	CHEK1,AURKA,NEK2,KIF11,RANBP1
GO: Biological Process	GO:0051093	negative regulation of developmental process			5.774e-06	0.02872	8.81e-05	0.0008008	45	1194	MYCN,SOX11,MAP2,ETV4,HMGB3,BRINP1,DLK1,BCOR,MDK,EZH2,MEIS1,HOXA2,HOXA5,FZD7,HOXA7,JARID2,CDK5R1,SINHCAF,SALL1,FBXO5,PTPRG,ASPM,PRMT1,FGF8,ITM2C,NME1,FOXC1,FOXM1,TCF3,FZD3,WT1,CITED1,INPP5F,HMGA2,HEY1,SLIT1,DLL3,LRP4,ROBO1,PAX2,PRKDC,PRAME,SIX2,KDM1A,HDAC2
GO: Biological Process	GO:0097485	neuron projection guidance			5.898e-06	0.02934	8.972e-05	0.0008155	19	308	ETV1,ETV4,NCAM1,TUBB2B,CHN1,GFRA1,HOXA1,HOXA2,CDK5R1,NRXN1,FGF8,FOXD1,NRTN,FZD3,DPYSL4,EFNA4,SLIT1,UNC5C,ROBO1
GO: Biological Process	GO:0061458	reproductive system development			5.977e-06	0.02973	9.064e-05	0.0008239	26	521	KIF18A,KDM5B,BRIP1,PATZ1,PEG10,NASP,HMGB2,RRM1,HOXA10,HOXA11,SALL1,ASPM,PLAG1,FGF8,FOXC1,WT1,CITED1,CHD7,MSH2,E2F8,HMGA2,HEY1,VASH2,TMF1,SMARCC1,PLK4
GO: Biological Process	GO:0035295	tube development			6.452e-06	0.03209	9.755e-05	0.0008866	47	1276	MYCN,SOX11,KIF18A,KDM5B,DLG5,BRIP1,ETV4,ETV5,EYA1,MDK,MEIS1,HOXA1,HOXA5,TYMS,HOXA7,HOXA11,SALL2,SALL1,GPC3,BRCA1,NRXN1,HOXD11,FGF8,TIMELESS,NPY,FOXC1,FOXD1,COL2A1,FOXM1,FZD3,WT1,CITED1,CHD7,STIL,SIX1,E2F8,CCNB1,HMGA2,HEY1,VASH2,ROBO1,PAX2,HAS2,FZD2,TMEM100,SIX2,MYB
GO: Biological Process	GO:0090596	sensory organ morphogenesis			6.472e-06	0.03219	9.755e-05	0.0008866	19	310	SOX11,ATP8A2,EYA1,MEIS1,HOXA1,HOXA2,SALL1,FGF8,COL2A1,CHRNA9,FZD3,SOBP,ITGA8,CHD7,SIX1,PAX2,FZD2,SIX2,HDAC2
GO: Biological Process	GO:0032465	regulation of cytokinesis			7.63e-06	0.03795	0.0001147	0.001042	10	91	AURKA,KIF14,KIF23,PRC1,ECT2,E2F8,KIF20A,RACGAP1,CDC6,AURKB
GO: Biological Process	GO:0007498	mesoderm development			7.72e-06	0.0384	0.0001157	0.001051	17	258	TGIF2,EYA1,FZD7,HOXA11,MEST,SALL1,GPC3,FGF8,FOXC1,TCF3,ITGA8,HMGA2,TENM4,DLL3,PAX2,TCF7L1,SIX2
GO: Biological Process	GO:0008584	male gonad development			8.162e-06	0.0406	0.0001219	0.001108	13	157	KIF18A,BRIP1,PATZ1,NASP,HMGB2,RRM1,HOXA10,HOXA11,ASPM,WT1,MSH2,HMGA2,TMF1
GO: Biological Process	GO:0014013	regulation of gliogenesis			8.746e-06	0.0435	0.0001299	0.00118	13	158	MYCN,SOX11,ETV5,MDK,EZH2,PLAG1,HMGA2,TENM4,TIAM1,DLL3,CDK1,HDAC2,MYB
GO: Biological Process	GO:0046546	development of primary male sexual characteristics			8.746e-06	0.0435	0.0001299	0.00118	13	158	KIF18A,BRIP1,PATZ1,NASP,HMGB2,RRM1,HOXA10,HOXA11,ASPM,WT1,MSH2,HMGA2,TMF1
GO: Biological Process	GO:0046661	male sex differentiation			1.041e-05	0.05177	0.0001541	0.001401	14	185	KIF18A,BRIP1,PATZ1,NASP,HMGB2,RRM1,HOXA10,HOXA11,ASPM,FGF8,WT1,MSH2,HMGA2,TMF1
GO: Biological Process	GO:0045666	positive regulation of neuron differentiation			1.078e-05	0.0536	0.000159	0.001446	24	474	SOX11,DLG5,TGIF2,ATP8A2,ETV5,TUBB2B,BRINP1,DBN1,MDK,EZH2,SALL1,SYT1,NME1,RANBP1,TCF3,PPP1R9A,SH3GL3,ENC1,CRABP2,ECT2,TIAM1,ROBO1,ELAVL4,KDM1A
GO: Biological Process	GO:0007076	mitotic chromosome condensation			1.134e-05	0.05639	0.0001668	0.001516	5	17	NUSAP1,NCAPG,NCAPD2,SMC4,NCAPH
GO: Biological Process	GO:0002009	morphogenesis of an epithelium			1.141e-05	0.05674	0.0001674	0.001521	29	641	MYCN,SOX11,KDM5B,DLG5,ETV4,ETV5,EYA1,MDK,HOXA5,FZD7,HOXA11,SALL1,GPC3,HOXD11,FGF8,TIMELESS,FOXD1,FZD3,WT1,CITED1,STIL,SIX1,HMGA2,TIAM1,HEY1,ROBO1,PAX2,FZD2,SIX2
GO: Biological Process	GO:0070317	negative regulation of G0 to G1 transition			1.146e-05	0.05699	0.0001676	0.001523	7	42	CHEK1,RRM2,EZH2,CDC7,BRCA1,RAD51,RBBP4
GO: Biological Process	GO:0007283	spermatogenesis			1.283e-05	0.06381	0.0001871	0.001701	28	611	PTTG1,BRIP1,CLGN,PATZ1,ETV5,HMGB2,SRPK1,RPL39L,TRIP13,SEPTIN6,HOXA10,HOXA11,HOXC4,CADM1,ASPM,HSF2,KIFC1,DNMT3A,IFT81,WT1,CCNB1,HMGA2,ADGRG2,PAFAH1B3,H2AX,TMF1,RACGAP1,CDC25C
GO: Biological Process	GO:0045137	development of primary sexual characteristics			1.333e-05	0.06631	0.0001939	0.001762	17	269	KIF18A,BRIP1,PATZ1,DACH1,NASP,HMGB2,RRM1,HOXA10,HOXA11,SALL1,ASPM,FGF8,FOXC1,WT1,MSH2,HMGA2,TMF1
GO: Biological Process	GO:0045740	positive regulation of DNA replication			1.347e-05	0.06698	0.0001953	0.001775	7	43	CDC7,DBF4,DNA2,E2F8,CDK1,PCNA,CDK2
GO: Biological Process	GO:0048762	mesenchymal cell differentiation			1.367e-05	0.06802	0.0001977	0.001797	16	242	SOX11,DLG5,MDK,EZH2,FGF8,FOXC1,NRTN,EDN3,HMGA2,TIAM1,HEY1,PAX2,HAS2,TMEM100,SIX2,HDAC2
GO: Biological Process	GO:0046602	regulation of mitotic centrosome separation			1.397e-05	0.06947	0.0002008	0.001825	4	9	CHEK1,NEK2,KIF11,RANBP1
GO: Biological Process	GO:0043137	DNA replication, removal of RNA primer			1.397e-05	0.06947	0.0002008	0.001825	4	9	FEN1,DNA2,RNASEH2A,PCNA
GO: Biological Process	GO:0090102	cochlea development			1.498e-05	0.07451	0.0002147	0.001952	8	60	MCM2,EYA1,HOXA1,SOBP,SIX1,CCNA2,PAX2,FZD2
GO: Biological Process	GO:0051782	negative regulation of cell division			1.546e-05	0.07689	0.0002209	0.002008	5	18	ORC6,BLM,ASPM,E2F8,AURKB
GO: Biological Process	GO:0006284	base-excision repair			1.576e-05	0.07839	0.0002246	0.002042	7	44	FEN1,UNG,DNA2,APEX1,HMGA2,NEIL3,PCNA
GO: Biological Process	GO:0048667	cell morphogenesis involved in neuron differentiation			1.627e-05	0.08094	0.0002313	0.002102	30	688	MAP2,ATP8A2,ETV1,ETV4,NCAM1,TUBB2B,DBN1,CHN1,GFRA1,HOXA1,HOXA2,CDK5R1,NRXN1,UCHL1,FGF8,FOXD1,NRTN,FZD3,PPP1R9A,STMN1,CRABP2,EFNA4,TIAM1,SLIT1,UNC5C,AUTS2,LRP4,ROBO1,ELAVL4,PAX2
GO: Biological Process	GO:0003156	regulation of animal organ formation			1.837e-05	0.09135	0.0002603	0.002366	7	45	EYA1,HOXA11,HOXD11,FGF8,WT1,SIX1,ROBO1
GO: Biological Process	GO:0000904	cell morphogenesis involved in differentiation			1.862e-05	0.09262	0.0002631	0.002392	35	872	MAP2,ATP8A2,ETV1,ETV4,NCAM1,TUBB2B,DBN1,MDK,CHN1,GFRA1,HOXA1,HOXA2,FZD7,CDK5R1,NRXN1,UCHL1,KIF14,FGF8,FOXD1,NRTN,FZD3,PPP1R9A,ITGA8,STMN1,CRABP2,EFNA4,TIAM1,SLIT1,UNC5C,AUTS2,LRP4,ROBO1,ELAVL4,PAX2,HAS2
GO: Biological Process	GO:0071236	cellular response to antibiotic			1.922e-05	0.09561	0.0002709	0.002462	13	170	EZH2,ADCY2,HOXA1,TIMELESS,DNMT3A,RANBP1,APEX1,ECT2,PAX2,CDK1,PCNA,HDAC2,MYB
GO: Biological Process	GO:0110110	positive regulation of animal organ morphogenesis			1.934e-05	0.09619	0.0002715	0.002468	10	101	MDK,HOXA11,SALL1,HOXD11,FGF8,WT1,SIX1,HMGA2,ROBO1,PAX2
GO: Biological Process	GO:0040008	regulation of growth			1.938e-05	0.09638	0.0002715	0.002468	33	801	PTTG1,MAP2,CACNA2D2,ATP8A2,NCAM1,ACTL6A,DBN1,MEIS1,JARID2,NELL2,CDK5R1,GPC3,KIF14,SYT1,FGF8,TMEM97,UBE2E3,PSRC1,FOXC1,PLAAT1,WT1,CHD7,SIX1,CRABP2,CCNB1,YEATS4,HMGA2,CCNB2,SLIT1,CDK1,PRKDC,PRAME,HDAC2
GO: Biological Process	GO:0030326	embryonic limb morphogenesis			1.955e-05	0.09724	0.0002724	0.002476	12	146	MYCN,HOXA10,HOXA11,SALL1,GPC3,HOXD10,HOXD11,FGF8,CHD7,CRABP2,LRP4,HDAC2
GO: Biological Process	GO:0035113	embryonic appendage morphogenesis			1.955e-05	0.09724	0.0002724	0.002476	12	146	MYCN,HOXA10,HOXA11,SALL1,GPC3,HOXD10,HOXD11,FGF8,CHD7,CRABP2,LRP4,HDAC2
GO: Biological Process	GO:0051347	positive regulation of transferase activity			2.011e-05	0.1	0.0002794	0.00254	31	731	CENPE,EZH2,ADCY2,CKS1B,CKS2,NEK2,CDK5R1,NRXN1,DBF4,KIF14,UBE2S,DSCC1,PSRC1,TCF3,PPP1R9A,UBE2C,STIL,RFC3,RFC4,ECT2,EDN3,CCNB1,HMGA2,TIAM1,TPX2,FZD10,ROBO1,CDK1,CDC6,CDC20,AURKB
GO: Biological Process	GO:0060249	anatomical structure homeostasis			2.051e-05	0.102	0.0002839	0.002581	24	493	BARD1,DLK1,MARCKSL1,CHRNA1,BLM,NEK2,NELL2,FEN1,DNA2,FOXC1,COL2A1,RAD51,POLE2,APEX1,RFC3,RFC4,CCNE1,CCNE2,PRIM1,PRIM2,EXO1,PRKDC,PCNA,AURKB
GO: Biological Process	GO:0007411	axon guidance			2.055e-05	0.1022	0.0002839	0.002581	18	307	ETV1,ETV4,NCAM1,TUBB2B,CHN1,GFRA1,HOXA1,HOXA2,CDK5R1,NRXN1,FGF8,FOXD1,NRTN,FZD3,EFNA4,SLIT1,UNC5C,ROBO1
GO: Biological Process	GO:0072074	kidney mesenchyme development			2.066e-05	0.1028	0.0002846	0.002587	5	19	FOXD1,WT1,SIX1,PAX2,SIX2
GO: Biological Process	GO:0071900	regulation of protein serine/threonine kinase activity			2.104e-05	0.1046	0.000289	0.002627	26	560	CDKN3,EZH2,BLM,CKS1B,CKS2,CDK5R1,NRXN1,DBF4,UCHL1,PSRC1,CCNJ,STIL,EDN3,CCNA2,CCNB1,CCNE1,HMGA2,TIAM1,CCNB2,CCNE2,FZD10,ROBO1,CDK1,CDC6,CDC25A,CDC25C
GO: Biological Process	GO:0051293	establishment of spindle localization			2.132e-05	0.106	0.0002913	0.002648	7	46	NUSAP1,CENPA,EYA1,SPDL1,NDC80,SPAG5,MAD2L1
GO: Biological Process	GO:0010569	regulation of double-strand break repair via homologous recombination			2.132e-05	0.106	0.0002913	0.002648	7	46	CHEK1,BLM,TIMELESS,PARPBP,RAD51,RAD51AP1,KDM1A
GO: Biological Process	GO:0051255	spindle midzone assembly			2.293e-05	0.1141	0.0003108	0.002825	4	10	KIF4A,KIF23,RACGAP1,AURKB
GO: Biological Process	GO:0072217	negative regulation of metanephros development			2.293e-05	0.1141	0.0003108	0.002825	4	10	SALL1,WT1,CITED1,PAX2
GO: Biological Process	GO:0006269	DNA replication, synthesis of RNA primer			2.293e-05	0.1141	0.0003108	0.002825	4	10	DNA2,PRIM1,PRIM2,PCNA
GO: Biological Process	GO:0017145	stem cell division			2.314e-05	0.1151	0.0003128	0.002843	13	173	SOX11,ETV5,HMGB2,FZD7,HOXC4,ASPM,FZD3,CITED1,HMGA2,RACGAP1,SIX2,KDM1A,MYB
GO: Biological Process	GO:0070316	regulation of G0 to G1 transition			2.465e-05	0.1226	0.0003323	0.00302	7	47	CHEK1,RRM2,EZH2,CDC7,BRCA1,RAD51,RBBP4
GO: Biological Process	GO:1902315	nuclear cell cycle DNA replication initiation			2.544e-05	0.1265	0.0003401	0.003092	3	4	MCM2,MCM3,MCM4
GO: Biological Process	GO:1902292	cell cycle DNA replication initiation			2.544e-05	0.1265	0.0003401	0.003092	3	4	MCM2,MCM3,MCM4
GO: Biological Process	GO:1902975	mitotic DNA replication initiation			2.544e-05	0.1265	0.0003401	0.003092	3	4	MCM2,MCM3,MCM4
GO: Biological Process	GO:0097329	response to antimetabolite			2.713e-05	0.1349	0.0003617	0.003288	5	20	BLM,DHFR,TIMELESS,RAD51,ASNS
GO: Biological Process	GO:0042493	response to drug			2.821e-05	0.1403	0.0003752	0.00341	43	1194	CDO1,CENPF,HMGB2,NCAM1,PFAS,CA14,MCM7,MDK,EZH2,ADCY2,CHRNA1,CHRNA5,HOXA1,BLM,TYMS,CDK5R1,LYPD1,BRCA1,DHFR,RAD54B,SYT1,FGF8,TIMELESS,NME1,DNMT3A,RAD51,TCF3,FZD3,APEX1,PPAT,ECT2,CCNA2,CCNB1,HMGA2,TIAM1,ASNS,RGS17,PAX2,CDK1,PCNA,CDK2,HDAC2,MYB
GO: Biological Process	GO:0000122	negative regulation of transcription by RNA polymerase II			3.1e-05	0.1542	0.0004112	0.003737	36	931	SOX11,TGIF2,BACH2,PEG3,DACH1,HIC2,BCOR,EZH2,HOXA2,HOXA7,JARID2,SALL2,SALL1,MACROH2A2,TIMELESS,FOXC1,DNMT3A,FOXM1,TCF3,NSD2,WT1,E2F5,SIX1,SUV39H2,E2F8,CCNE1,HMGA2,HEY1,TLE4,PAX2,KDM1A,PCNA,CDK2,HDAC2,MYB,AURKB
GO: Biological Process	GO:0060173	limb development			3.121e-05	0.1552	0.0004117	0.003742	14	204	MYCN,SOX11,HOXA10,HOXA11,SALL1,GPC3,HOXD10,HOXD11,FGF8,COL2A1,CHD7,CRABP2,LRP4,HDAC2
GO: Biological Process	GO:0048736	appendage development			3.121e-05	0.1552	0.0004117	0.003742	14	204	MYCN,SOX11,HOXA10,HOXA11,SALL1,GPC3,HOXD10,HOXD11,FGF8,COL2A1,CHD7,CRABP2,LRP4,HDAC2
GO: Biological Process	GO:0035239	tube morphogenesis			3.146e-05	0.1565	0.0004139	0.003762	39	1045	MYCN,SOX11,KDM5B,DLG5,ETV4,ETV5,EYA1,MDK,MEIS1,HOXA1,HOXA5,HOXA7,HOXA11,SALL1,GPC3,BRCA1,NRXN1,HOXD11,FGF8,TIMELESS,FOXC1,FOXD1,FOXM1,FZD3,WT1,CITED1,CHD7,STIL,SIX1,E2F8,HMGA2,HEY1,VASH2,ROBO1,PAX2,HAS2,FZD2,TMEM100,SIX2
GO: Biological Process	GO:0000018	regulation of DNA recombination			3.204e-05	0.1594	0.0004205	0.003822	10	107	CHEK1,BLM,TIMELESS,PARPBP,RAD51,NSD2,MSH2,RAD51AP1,MSH6,KDM1A
GO: Biological Process	GO:0006890	retrograde vesicle-mediated transport, Golgi to endoplasmic reticulum			3.236e-05	0.1609	0.0004235	0.00385	9	86	KIF18A,CENPE,KIF4A,KIF15,KIF11,KIF2C,KIF23,NBAS,RACGAP1
GO: Biological Process	GO:0045023	G0 to G1 transition			3.261e-05	0.1622	0.0004257	0.003869	7	49	CHEK1,RRM2,EZH2,CDC7,BRCA1,RAD51,RBBP4
GO: Biological Process	GO:2000134	negative regulation of G1/S transition of mitotic cell cycle			3.306e-05	0.1645	0.0004305	0.003913	11	130	EZH2,AURKA,PRMT1,PCBP4,E2F8,CCNB1,CDK1,PRKDC,CDC25C,PCNA,CDK2
GO: Biological Process	GO:0048332	mesoderm morphogenesis			3.475e-05	0.1728	0.0004513	0.004102	14	206	TGIF2,EYA1,FZD7,HOXA11,GPC3,FGF8,FOXC1,TCF3,ITGA8,HMGA2,TENM4,PAX2,TCF7L1,SIX2
GO: Biological Process	GO:0072087	renal vesicle development			3.506e-05	0.1744	0.0004541	0.004128	5	21	SALL1,CITED1,HEY1,PAX2,SIX2
GO: Biological Process	GO:0051493	regulation of cytoskeleton organization			3.592e-05	0.1786	0.000464	0.004218	26	578	KIF18A,MAP2,CEP76,CHEK1,DBN1,MDK,ADD2,AURKA,NEK2,CDK5R1,BRCA1,WASF1,PSRC1,KIF11,RANBP1,RAE1,PPP1R9A,STMN1,STIL,ECT2,SPAG5,TPX2,FZD10,CKAP2,PLK4,HDAC2
GO: Biological Process	GO:0009411	response to UV			3.779e-05	0.188	0.0004868	0.004425	12	156	PCLAF,PBK,CHEK1,H2AW,FEN1,DTL,MSH2,MSH6,CDC25A,KDM1A,PCNA,AURKB
GO: Biological Process	GO:0008406	gonad development			3.788e-05	0.1884	0.0004868	0.004425	16	263	KIF18A,BRIP1,PATZ1,NASP,HMGB2,RRM1,HOXA10,HOXA11,SALL1,ASPM,FGF8,FOXC1,WT1,MSH2,HMGA2,TMF1
GO: Biological Process	GO:0007548	sex differentiation			3.855e-05	0.1918	0.0004942	0.004492	18	322	KIF18A,BRIP1,PATZ1,DACH1,NASP,HMGB2,RRM1,HOXA10,HOXA11,SALL1,ASPM,FGF8,FOXC1,WT1,CHD7,MSH2,HMGA2,TMF1
GO: Biological Process	GO:0031572	G2 DNA damage checkpoint			4.168e-05	0.2073	0.0005303	0.00482	6	35	CHEK1,BLM,BRCA1,DTL,HMGA2,CDK1
GO: Biological Process	GO:0008045	motor neuron axon guidance			4.168e-05	0.2073	0.0005303	0.00482	6	35	ETV4,CHN1,HOXA1,HOXA2,FGF8,SLIT1
GO: Biological Process	GO:0040001	establishment of mitotic spindle localization			4.168e-05	0.2073	0.0005303	0.00482	6	35	NUSAP1,CENPA,EYA1,SPDL1,NDC80,MAD2L1
GO: Biological Process	GO:0001101	response to acid chemical			4.248e-05	0.2113	0.000539	0.004899	20	386	CDO1,BRINP1,HOXA1,HOXA2,TYMS,FZD7,MEST,DHFR,NME1,DNMT3A,RANBP1,SIX1,CCNB1,DNAAF2,ASNS,FZD10,PAX2,PCNA,HDAC2,MYB
GO: Biological Process	GO:0022412	cellular process involved in reproduction in multicellular organism			4.598e-05	0.2287	0.0005819	0.005289	21	420	KIF18A,BRIP1,ETV5,HMGB2,SRPK1,MDK,TRIP13,TTK,AURKA,HOXC4,FBXO5,ASPM,FOXC1,DNMT3A,WT1,MSH2,NCAPH,SUV39H2,CCNB1,TMF1,TOP2A
GO: Biological Process	GO:0016444	somatic cell DNA recombination			4.7e-05	0.2338	0.0005919	0.00538	8	70	HMGB2,UNG,TCF3,NSD2,MSH2,MSH6,EXO1,PRKDC
GO: Biological Process	GO:0002562	somatic diversification of immune receptors via germline recombination within a single locus			4.7e-05	0.2338	0.0005919	0.00538	8	70	HMGB2,UNG,TCF3,NSD2,MSH2,MSH6,EXO1,PRKDC
GO: Biological Process	GO:0045739	positive regulation of DNA repair			5.212e-05	0.2592	0.0006547	0.00595	8	71	EYA1,BLM,BRCA1,TIMELESS,FOXM1,H2AX,PRKDC,PCNA
GO: Biological Process	GO:0007077	mitotic nuclear envelope disassembly			5.248e-05	0.261	0.0006575	0.005977	4	12	VRK1,CCNB1,CCNB2,CDK1
GO: Biological Process	GO:0048638	regulation of developmental growth			5.268e-05	0.262	0.0006583	0.005984	21	424	MAP2,CACNA2D2,ATP8A2,NCAM1,DBN1,MEIS1,JARID2,CDK5R1,SYT1,FGF8,FOXC1,WT1,CHD7,SIX1,CRABP2,CCNB1,HMGA2,SLIT1,CDK1,PRKDC,HDAC2
GO: Biological Process	GO:1902807	negative regulation of cell cycle G1/S phase transition			5.363e-05	0.2668	0.0006686	0.006077	11	137	EZH2,AURKA,PRMT1,PCBP4,E2F8,CCNB1,CDK1,PRKDC,CDC25C,PCNA,CDK2
GO: Biological Process	GO:0051781	positive regulation of cell division			5.542e-05	0.2756	0.0006891	0.006263	9	92	MDK,HOXC4,KIF14,FGF8,KIF23,ECT2,RACGAP1,CDC6,AURKB
GO: Biological Process	GO:0007143	female meiotic nuclear division			5.785e-05	0.2878	0.0007158	0.006506	6	37	TRIP13,TTK,AURKA,FBXO5,NCAPH,TOP2A
GO: Biological Process	GO:0048333	mesodermal cell differentiation			5.785e-05	0.2878	0.0007158	0.006506	6	37	EYA1,HOXA11,ITGA8,HMGA2,PAX2,SIX2
GO: Biological Process	GO:0014855	striated muscle cell proliferation			6.036e-05	0.3002	0.000745	0.006771	9	93	NCAM1,MEIS1,JARID2,FOXC1,SIX1,CCNB1,TENM4,CDK1,HDAC2
GO: Biological Process	GO:0034622	cellular protein-containing complex assembly			6.412e-05	0.3189	0.0007895	0.007176	44	1277	CENPN,CENPA,MAP2,CENPE,CENPF,LRRC49,WASF3,HJURP,NASP,MCM2,OIP5,HMGB2,MCM3,NCAM1,SRPK1,MCM4,MCM6,MCM7,DBN1,ADD2,CDC45,NEK2,CDK5R1,FBXO5,UBE2S,MACROH2A2,WASF1,PSRC1,RAD51,RBBP4,MIS18A,PPP1R9A,UBE2C,CENPU,STMN1,GMNN,CENPQ,DNAAF2,H2AX,SNRPD1,SNRPE,SNRPF,AURKB,HELLS
GO: Biological Process	GO:0060560	developmental growth involved in morphogenesis			6.451e-05	0.3209	0.0007922	0.007201	16	275	KDM5B,MAP2,DBN1,AURKA,CDK5R1,CADM1,SALL1,SYT1,WASF1,SIX1,CRABP2,TIAM1,SLIT1,AUTS2,ROBO1,KDM1A
GO: Biological Process	GO:0007018	microtubule-based movement			6.738e-05	0.3351	0.0008255	0.007503	28	671	KIF18A,MAP2,CENPE,LRRC49,DLGAP5,KIF4A,CEP76,SEPTIN6,NEK2,KIF15,UCHL1,KIF14,WASF1,KIF11,KIFC1,KIF2C,KIF23,IFT81,WT1,STIL,KIF20A,TBC1D8,DNAAF2,TMF1,RACGAP1,CDK1,KIF18B,PLK4
GO: Biological Process	GO:0051294	establishment of spindle orientation			6.763e-05	0.3364	0.0008265	0.007512	6	38	CENPA,EYA1,SPDL1,NDC80,SPAG5,MAD2L1
GO: Biological Process	GO:0007019	microtubule depolymerization			6.999e-05	0.3481	0.0008532	0.007755	7	55	KIF18A,MAP2,KIF14,KIF2C,STMN1,CKAP2,KIF18B
GO: Biological Process	GO:0007398	ectoderm development			7.105e-05	0.3534	0.0008641	0.007854	14	220	TGIF2,EYA1,FZD7,HOXA11,SALL1,GPC3,FGF8,FOXC1,TCF3,ITGA8,HMGA2,TENM4,PAX2,SIX2
GO: Biological Process	GO:2000105	positive regulation of DNA-dependent DNA replication			7.469e-05	0.3715	0.0009039	0.008216	4	13	CDC7,DBF4,E2F8,CDK2
GO: Biological Process	GO:0003337	mesenchymal to epithelial transition involved in metanephros morphogenesis			7.469e-05	0.3715	0.0009039	0.008216	4	13	SALL1,CITED1,PAX2,SIX2
GO: Biological Process	GO:0045596	negative regulation of cell differentiation			7.761e-05	0.386	0.000937	0.008517	33	860	MYCN,SOX11,MAP2,HMGB3,BRINP1,DLK1,MDK,EZH2,MEIS1,HOXA2,HOXA5,FZD7,HOXA7,CDK5R1,SINHCAF,SALL1,PTPRG,ASPM,PRMT1,ITM2C,NME1,TCF3,CITED1,INPP5F,HMGA2,HEY1,SLIT1,DLL3,LRP4,PRAME,SIX2,KDM1A,HDAC2
GO: Biological Process	GO:0032506	cytokinetic process			7.868e-05	0.3914	0.0009457	0.008596	6	39	KIF23,ECT2,CEP55,KIF20A,RACGAP1,AURKB
GO: Biological Process	GO:0009948	anterior/posterior axis specification			7.872e-05	0.3915	0.0009457	0.008596	7	56	AURKA,GPC3,PGAP1,WT1,HEY1,TCF7L1,SIX2
GO: Biological Process	GO:0071300	cellular response to retinoic acid			8.519e-05	0.4238	0.001019	0.009259	8	76	BRINP1,HOXA1,HOXA2,FZD7,FZD10,PAX2,HDAC2,MYB
GO: Biological Process	GO:0048645	animal organ formation			8.519e-05	0.4238	0.001019	0.009259	8	76	EYA1,HOXA11,HOXD11,FGF8,WT1,SIX1,ROBO1,PAX2
GO: Biological Process	GO:2000104	negative regulation of DNA-dependent DNA replication			8.608e-05	0.4282	0.001022	0.009288	5	25	BLM,FBXO5,TIMELESS,GMNN,MSH6
GO: Biological Process	GO:1904666	regulation of ubiquitin protein ligase activity			8.608e-05	0.4282	0.001022	0.009288	5	25	FBXO5,UBE2S,UBE2C,CDC20,MAD2L1
GO: Biological Process	GO:0000729	DNA double-strand break processing			8.608e-05	0.4282	0.001022	0.009288	5	25	BRIP1,BARD1,BLM,BRCA1,DNA2
GO: Biological Process	GO:0009628	response to abiotic stimulus			8.706e-05	0.433	0.001031	0.009371	46	1375	BRIP1,PCLAF,ATP8A2,PBK,ETV1,CHEK1,EYA1,MDK,RRM1,NMU,HOXA1,BLM,H2AW,BRCA1,NRXN1,RAD54B,FEN1,TIMELESS,HSF2,NUP160,DNMT3A,RAD51,CHRNA9,RAE1,FZD3,DTL,MSH2,ECT2,SUV39H2,CCNA2,CCNB1,RAD51AP1,MSH6,HMGA2,ASNS,ZNF516,H2AX,PAX2,PRKDC,CDC25A,KDM1A,PCNA,CDK2,HDAC2,MYB,AURKB
GO: Biological Process	GO:0016447	somatic recombination of immunoglobulin gene segments			8.831e-05	0.4393	0.001043	0.009484	7	57	UNG,TCF3,NSD2,MSH2,MSH6,EXO1,PRKDC
GO: Biological Process	GO:0010092	specification of animal organ identity			9.112e-05	0.4532	0.001074	0.009762	6	40	HOXA11,HOXD11,FGF8,SIX1,ROBO1,PAX2
GO: Biological Process	GO:0060038	cardiac muscle cell proliferation			9.355e-05	0.4653	0.0011	0.009998	8	77	NCAM1,MEIS1,JARID2,FOXC1,CCNB1,TENM4,CDK1,HDAC2
GO: Biological Process	GO:0010975	regulation of neuron projection development			9.44e-05	0.4695	0.001107	0.01007	26	613	DLG5,MAP2,ATP8A2,TUBB2B,DBN1,MDK,EZH2,CHN1,CDK5R1,PTPRG,SYT1,ITM2C,NME1,RANBP1,PPP1R9A,ENC1,INPP5F,CRABP2,TIAM1,SLIT1,LRP4,ROBO1,ELAVL4,CDC20,KDM1A,HDAC2
GO: Biological Process	GO:0051445	regulation of meiotic cell cycle			9.885e-05	0.4917	0.001157	0.01051	7	58	TRIP13,TTK,FBXO5,ASPM,CDC20,CDC25A,CDC25C
GO: Biological Process	GO:0007501	mesodermal cell fate specification			0.000103	0.5125	0.001203	0.01093	4	14	EYA1,HOXA11,PAX2,SIX2
GO: Biological Process	GO:0072273	metanephric nephron morphogenesis			0.000105	0.5221	0.001221	0.0111	5	26	SALL1,WT1,CITED1,PAX2,SIX2
GO: Biological Process	GO:0019985	translesion synthesis			0.0001051	0.5227	0.001221	0.0111	6	41	PCLAF,POLE2,DTL,RFC3,RFC4,PCNA
GO: Biological Process	GO:0001701	in utero embryonic development			0.0001094	0.544	0.001268	0.01153	23	514	NASP,ACTL6A,CHEK1,DBN1,BCOR,GINS1,NEK2,PRMT1,FOXC1,CITED1,CHD7,MSH2,STIL,E2F8,CCNB1,HEY1,CCNB2,DLL3,VASH2,TMEM100,PLK4,KDM1A,MYB
GO: Biological Process	GO:0051130	positive regulation of cellular component organization			0.0001135	0.5647	0.001313	0.01194	45	1350	NUSAP1,DLG5,CENPE,ATP8A2,DLGAP5,TUBB2B,DBN1,MDK,EZH2,AURKA,JARID2,NEK2,CDK5R1,FBXO5,GPC3,BRCA1,NRXN1,FEN1,SYT1,FGF8,MLLT11,NME1,WASF1,PSRC1,RANBP1,PPP1R9A,UBE2C,ENC1,BIRC5,CRABP2,EDN3,SPAG5,CCNB1,TIAM1,LRRTM2,AUTS2,LRP4,ROBO1,ELAVL4,HAS2,CDC20,PLK4,KDM1A,MYB,AURKB
GO: Biological Process	GO:0032526	response to retinoic acid			0.0001203	0.5982	0.001383	0.01257	10	125	BRINP1,HOXA1,HOXA2,FZD7,MEST,DNAAF2,FZD10,PAX2,HDAC2,MYB
GO: Biological Process	GO:0034968	histone lysine methylation			0.0001203	0.5982	0.001383	0.01257	10	125	BCOR,EZH2,JARID2,BRCA1,NSD2,SUV39H2,AUTS2,KDM1A,HDAC2,MYB
GO: Biological Process	GO:0008156	negative regulation of DNA replication			0.0001207	0.6003	0.001383	0.01257	6	42	BLM,FBXO5,TIMELESS,GMNN,MSH6,CDC6
GO: Biological Process	GO:0032467	positive regulation of cytokinesis			0.0001207	0.6003	0.001383	0.01257	6	42	KIF14,KIF23,ECT2,RACGAP1,CDC6,AURKB
GO: Biological Process	GO:0035690	cellular response to drug			0.0001231	0.6124	0.001398	0.01271	22	484	EZH2,ADCY2,HOXA1,BLM,CDK5R1,LYPD1,BRCA1,TIMELESS,NME1,DNMT3A,RAD51,APEX1,PPAT,ECT2,CCNA2,HMGA2,PAX2,CDK1,PCNA,CDK2,HDAC2,MYB
GO: Biological Process	GO:0007267	cell-cell signaling			0.0001234	0.6136	0.001398	0.01271	58	1899	SOX11,KDM5B,CACNA2D2,ETV5,NCAM1,TUBB2B,DBN1,MDK,CHRNA1,CHRNA5,NMU,HOXA5,FZD7,HOXA11,NELL2,CDK5R1,LYPD1,CADM1,SALL1,GPC3,NRXN1,HOXD11,ASPM,SYT1,FGF8,NNAT,NPY,FOXD1,NOVA1,DPP6,NPTX2,CHRNA9,FZD3,PPP1R9A,BIRC5,CITED1,CHD7,SIX1,EDN3,CCNE1,EFNA4,HMGA2,TIAM1,NETO2,TLE1,TLE4,LRRTM2,CXXC4,LRP4,TMF1,FZD10,ROBO1,ELAVL4,CDC20,FZD2,TCF7L1,HDAC2,MYB
GO: Biological Process	GO:0000915	actomyosin contractile ring assembly			0.0001237	0.6152	0.001398	0.01271	3	6	KIF23,ECT2,RACGAP1
GO: Biological Process	GO:0000912	assembly of actomyosin apparatus involved in cytokinesis			0.0001237	0.6152	0.001398	0.01271	3	6	KIF23,ECT2,RACGAP1
GO: Biological Process	GO:0010032	meiotic chromosome condensation			0.0001237	0.6152	0.001398	0.01271	3	6	NCAPD2,SMC4,NCAPH
GO: Biological Process	GO:0051572	negative regulation of histone H3-K4 methylation			0.0001237	0.6152	0.001398	0.01271	3	6	BCOR,BRCA1,KDM1A
GO: Biological Process	GO:0050768	negative regulation of neurogenesis			0.0001247	0.6203	0.001407	0.01278	18	353	MYCN,SOX11,MAP2,BRINP1,MEIS1,HOXA2,CDK5R1,PTPRG,ASPM,ITM2C,INPP5F,HMGA2,HEY1,SLIT1,DLL3,LRP4,KDM1A,HDAC2
GO: Biological Process	GO:0001704	formation of primary germ layer			0.0001263	0.6281	0.001408	0.0128	13	204	TGIF2,EYA1,FZD7,HOXA11,GPC3,FGF8,FOXC1,TCF3,ITGA8,HMGA2,TENM4,PAX2,SIX2
GO: Biological Process	GO:0001705	ectoderm formation			0.0001263	0.6281	0.001408	0.0128	13	204	TGIF2,EYA1,FZD7,HOXA11,GPC3,FGF8,FOXC1,TCF3,ITGA8,HMGA2,TENM4,PAX2,SIX2
GO: Biological Process	GO:0001706	endoderm formation			0.0001263	0.6281	0.001408	0.0128	13	204	TGIF2,EYA1,FZD7,HOXA11,GPC3,FGF8,FOXC1,TCF3,ITGA8,HMGA2,TENM4,PAX2,SIX2
GO: Biological Process	GO:0001707	mesoderm formation			0.0001263	0.6281	0.001408	0.0128	13	204	TGIF2,EYA1,FZD7,HOXA11,GPC3,FGF8,FOXC1,TCF3,ITGA8,HMGA2,TENM4,PAX2,SIX2
GO: Biological Process	GO:0007369	gastrulation			0.0001263	0.6281	0.001408	0.0128	13	204	TGIF2,EYA1,FZD7,HOXA11,GPC3,FGF8,FOXC1,TCF3,ITGA8,HMGA2,TENM4,PAX2,SIX2
GO: Biological Process	GO:0060429	epithelium development			0.0001336	0.6645	0.001487	0.01351	48	1483	MYCN,SOX11,KDM5B,DLG5,ETV4,ETV5,EYA1,MDK,EZH2,MEOX1,HOXA5,TYMS,FZD7,HOXA7,HOXA11,SALL2,SALL1,GPC3,HOXD11,FGF8,MACROH2A2,TIMELESS,NPY,FOXC1,FOXD1,COL2A1,FZD3,WT1,CITED1,CHD7,STIL,SIX1,E2F8,HMGA2,TIAM1,HEY1,DLL3,LRP4,ROBO1,PAX2,CDK1,PRKDC,FZD2,TMEM100,PLK4,SIX2,PCNA,HDAC2
GO: Biological Process	GO:0007507	heart development			0.0001345	0.6691	0.001494	0.01358	28	699	SOX11,NCAM1,EYA1,BCOR,MEIS1,FZD7,JARID2,SALL1,GPC3,FGF8,FOXC1,COL2A1,NSD2,WT1,CHD7,STIL,SIX1,CCNB1,TENM4,HEY1,ROBO1,CDK1,PRKDC,HAS2,FZD2,TMEM100,PCNA,HDAC2
GO: Biological Process	GO:0072210	metanephric nephron development			0.0001381	0.6868	0.001526	0.01387	6	43	SALL1,FOXD1,WT1,CITED1,PAX2,SIX2
GO: Biological Process	GO:0031128	developmental induction			0.0001381	0.6868	0.001526	0.01387	6	43	HOXA11,SALL1,HOXD11,FGF8,SIX1,ROBO1
GO: Biological Process	GO:0071478	cellular response to radiation			0.0001392	0.6923	0.001535	0.01395	13	206	PBK,CHEK1,BLM,H2AW,RAD51,ECT2,RAD51AP1,HMGA2,H2AX,CDC25A,KDM1A,PCNA,AURKB
GO: Biological Process	GO:0045165	cell fate commitment			0.0001465	0.7289	0.001613	0.01466	17	326	EYA1,HOXA2,FZD7,HOXA11,SALL1,HOXD10,HOXD11,FGF8,TCF3,WT1,SIX1,TENM4,DLL3,ROBO1,PAX2,PRKDC,SIX2
GO: Biological Process	GO:0007568	aging			0.0001486	0.7389	0.001631	0.01483	18	358	ATP8A2,NCAM1,CHEK1,TYMS,FBXO5,RAD54B,DNMT3A,FOXM1,PPP1R9A,APEX1,MSH2,MSH6,HMGA2,H2AX,PAX2,CDK1,PRKDC,AURKB
GO: Biological Process	GO:0001759	organ induction			0.0001521	0.7564	0.001659	0.01508	5	28	HOXA11,HOXD11,FGF8,SIX1,ROBO1
GO: Biological Process	GO:0061217	regulation of mesonephros development			0.0001521	0.7564	0.001659	0.01508	5	28	SALL1,WT1,SIX1,PAX2,SIX2
GO: Biological Process	GO:0090103	cochlea morphogenesis			0.0001521	0.7564	0.001659	0.01508	5	28	EYA1,HOXA1,SIX1,PAX2,FZD2
GO: Biological Process	GO:0016571	histone methylation			0.0001536	0.7639	0.001672	0.01519	11	154	BCOR,EZH2,JARID2,BRCA1,PRMT1,NSD2,SUV39H2,AUTS2,KDM1A,HDAC2,MYB
GO: Biological Process	GO:0031109	microtubule polymerization or depolymerization			0.0001561	0.7766	0.001696	0.01541	10	129	KIF18A,MAP2,CDK5R1,FBXO5,KIF14,PSRC1,KIF2C,STMN1,CKAP2,KIF18B
GO: Biological Process	GO:0070925	organelle assembly			0.0001654	0.8226	0.001792	0.01629	34	934	CENPN,CENPA,CENPE,CENPF,LRRC49,KIF4A,CEP76,SEPTIN6,AURKA,NEK2,FBXO5,BRCA1,NRXN1,ASPM,SAC3D1,KIF11,KIFC1,KIF23,IFT81,BIRC5,STIL,SPAG5,TBC1D8,DNAAF2,LRRTM2,TPX2,TMF1,RACGAP1,CDK1,CDC20,PLK4,CDK2,HDAC2,AURKB
GO: Biological Process	GO:0090183	regulation of kidney development			0.0001679	0.8353	0.001816	0.01651	7	63	SALL1,FOXD1,WT1,CITED1,SIX1,PAX2,SIX2
GO: Biological Process	GO:0002200	somatic diversification of immune receptors			0.0001731	0.8609	0.001868	0.01697	8	84	HMGB2,UNG,TCF3,NSD2,MSH2,MSH6,EXO1,PRKDC
GO: Biological Process	GO:0045168	cell-cell signaling involved in cell fate commitment			0.0001788	0.8892	0.001924	0.01748	6	45	HOXA11,SALL1,HOXD11,FGF8,SIX1,ROBO1
GO: Biological Process	GO:2001022	positive regulation of response to DNA damage stimulus			0.0001791	0.8906	0.001924	0.01748	9	107	EYA1,BLM,BRCA1,TIMELESS,FOXM1,HMGA2,H2AX,PRKDC,PCNA
GO: Biological Process	GO:0051382	kinetochore assembly			0.0001819	0.9046	0.001926	0.01751	4	16	CENPN,CENPA,CENPE,CENPF
GO: Biological Process	GO:0072283	metanephric renal vesicle morphogenesis			0.0001819	0.9046	0.001926	0.01751	4	16	SALL1,CITED1,PAX2,SIX2
GO: Biological Process	GO:0030397	membrane disassembly			0.0001819	0.9046	0.001926	0.01751	4	16	VRK1,CCNB1,CCNB2,CDK1
GO: Biological Process	GO:0051081	nuclear envelope disassembly			0.0001819	0.9046	0.001926	0.01751	4	16	VRK1,CCNB1,CCNB2,CDK1
GO: Biological Process	GO:0000076	DNA replication checkpoint			0.0001819	0.9046	0.001926	0.01751	4	16	CDC45,TIMELESS,DNA2,CDC6
GO: Biological Process	GO:0090231	regulation of spindle checkpoint			0.0001819	0.9046	0.001926	0.01751	4	16	AURKA,NDC80,CCNB1,MAD2L1
GO: Biological Process	GO:0001837	epithelial to mesenchymal transition			0.000182	0.9053	0.001926	0.01751	11	157	DLG5,MDK,EZH2,FGF8,FOXC1,HMGA2,TIAM1,HEY1,HAS2,TMEM100,HDAC2
GO: Biological Process	GO:0045859	regulation of protein kinase activity			0.0001924	0.9571	0.002032	0.01847	33	903	CDKN3,CENPE,EZH2,ADCY2,BLM,CKS1B,CKS2,CDK5R1,NRXN1,DBF4,UCHL1,KIF14,PSRC1,TCF3,PPP1R9A,CCNJ,STIL,ECT2,EDN3,CCNA2,CCNB1,CCNE1,HMGA2,TIAM1,CCNB2,CCNE2,TPX2,FZD10,ROBO1,CDK1,CDC6,CDC25A,CDC25C
GO: Biological Process	GO:0050678	regulation of epithelial cell proliferation			0.0002016	1	0.002124	0.01931	20	433	SOX11,KDM5B,ETV4,HMGB2,DLK1,EYA1,MDK,HOXA5,FZD7,GPC3,NME1,BIRC5,SIX1,HMGA2,HEY1,VASH2,ROBO1,PAX2,PRKDC,HAS2
GO: Biological Process	GO:1902750	negative regulation of cell cycle G2/M phase transition			0.0002061	1	0.002167	0.0197	9	109	CHEK1,BLM,AURKA,BRCA1,DTL,HMGA2,CDK1,CDC6,AURKB
GO: Biological Process	GO:0044837	actomyosin contractile ring organization			0.0002134	1	0.002235	0.02031	3	7	KIF23,ECT2,RACGAP1
GO: Biological Process	GO:0072038	mesenchymal stem cell maintenance involved in nephron morphogenesis			0.0002134	1	0.002235	0.02031	3	7	SALL1,PAX2,SIX2
GO: Biological Process	GO:0051984	positive regulation of chromosome segregation			0.0002139	1	0.002235	0.02031	5	30	CENPE,DLGAP5,FEN1,CCNB1,CDC6
GO: Biological Process	GO:0048844	artery morphogenesis			0.000221	1	0.002305	0.02095	8	87	EYA1,MDK,HOXA1,FGF8,FOXC1,CHD7,SIX1,HEY1
GO: Biological Process	GO:0071599	otic vesicle development			0.0002343	1	0.002439	0.02216	4	17	EYA1,FGF8,COL2A1,SIX1
GO: Biological Process	GO:0061351	neural precursor cell proliferation			0.0002359	1	0.00245	0.02227	12	189	DBN1,MDK,RRM1,MELK,SALL1,ASPM,KIF14,FGF8,FZD3,HMGA2,RACGAP1,KDM1A
GO: Biological Process	GO:0000132	establishment of mitotic spindle orientation			0.0002511	1	0.002597	0.0236	5	31	CENPA,EYA1,SPDL1,NDC80,MAD2L1
GO: Biological Process	GO:0051569	regulation of histone H3-K4 methylation			0.0002511	1	0.002597	0.0236	5	31	BCOR,BRCA1,AUTS2,KDM1A,MYB
GO: Biological Process	GO:0046620	regulation of organ growth			0.0002553	1	0.002635	0.02395	10	137	CACNA2D2,NCAM1,MEIS1,JARID2,FGF8,FOXC1,WT1,CCNB1,CDK1,HDAC2
GO: Biological Process	GO:1905330	regulation of morphogenesis of an epithelium			0.00026	1	0.002677	0.02433	12	191	ETV5,MDK,FZD7,SALL1,GPC3,FZD3,CITED1,SIX1,TIAM1,PAX2,FZD2,SIX2
GO: Biological Process	GO:0051961	negative regulation of nervous system development			0.0002708	1	0.002783	0.02529	18	376	MYCN,SOX11,MAP2,BRINP1,MEIS1,HOXA2,CDK5R1,PTPRG,ASPM,ITM2C,INPP5F,HMGA2,HEY1,SLIT1,DLL3,LRP4,KDM1A,HDAC2
GO: Biological Process	GO:0003151	outflow tract morphogenesis			0.0002794	1	0.002865	0.02604	8	90	SOX11,EYA1,FGF8,FOXC1,SIX1,HEY1,ROBO1,FZD2
GO: Biological Process	GO:0030900	forebrain development			0.0002877	1	0.002944	0.02676	20	445	NCAM1,MDK,RRM1,EZH2,CDK5R1,SALL1,PGAP1,ASPM,KIF14,FGF8,NME1,NPY,CHD7,STIL,HMGA2,SLIT1,H2AX,ROBO1,KDM1A,HDAC2
GO: Biological Process	GO:2000648	positive regulation of stem cell proliferation			0.0002883	1	0.002944	0.02676	6	49	SOX11,ASPM,FZD3,CITED1,HMGA2,KDM1A
GO: Biological Process	GO:0009636	response to toxic substance			0.0002928	1	0.002984	0.02713	24	586	CDO1,KDM5B,BRIP1,EZH2,CHRNA1,CHRNA5,HOXA1,TYMS,LYPD1,DHFR,TIMELESS,DNMT3A,PPP1R9A,APEX1,ECT2,CCNB1,ASNS,RGS17,PAX2,CDK1,KDM1A,PCNA,HDAC2,MYB
GO: Biological Process	GO:0009719	response to endogenous stimulus			0.0002984	1	0.003035	0.02759	55	1834	SOX11,KIF18A,CDO1,KDM5B,BRIP1,PEG10,ZNF423,NASP,HMGB2,MCM7,DBN1,MDK,EZH2,NREP,ADCY2,STAT4,BLM,TYMS,CDK5R1,LYPD1,GPC3,BRCA1,NRXN1,FGF8,TIMELESS,NME1,WASF1,FOXC1,FOXD1,DNMT3A,COL2A1,RAD51,WT1,ITGA8,APEX1,CITED1,PPAT,SIX1,SKP2,CCNA2,CCNE1,HMGA2,TIA1,ASNS,H2AZ1,SMARCC1,PAX2,PRKDC,HAS2,CDC6,TMEM100,KDM1A,PCNA,CDK2,HDAC2
GO: Biological Process	GO:1905114	cell surface receptor signaling pathway involved in cell-cell signaling			0.0002991	1	0.003036	0.02759	28	734	DBN1,MDK,CHRNA1,CHRNA5,FZD7,LYPD1,SALL1,GPC3,NRXN1,ASPM,FGF8,NPTX2,CHRNA9,FZD3,PPP1R9A,CITED1,CCNE1,HMGA2,TIAM1,NETO2,TLE1,TLE4,CXXC4,LRP4,FZD10,FZD2,TCF7L1,HDAC2
GO: Biological Process	GO:0018022	peptidyl-lysine methylation			0.0003041	1	0.00308	0.028	10	140	BCOR,EZH2,JARID2,BRCA1,NSD2,SUV39H2,AUTS2,KDM1A,HDAC2,MYB
GO: Biological Process	GO:0022603	regulation of anatomical structure morphogenesis			0.0003089	1	0.003122	0.02838	42	1288	TGIF2,MAP2,MYO10,WASF3,ETV5,TUBB2B,EYA1,DBN1,BCOR,MDK,CHN1,HOXA5,FZD7,HOXA11,CDK5R1,SALL1,GPC3,BRCA1,HOXD11,SYT1,FGF8,FOXC1,FZD3,PPP1R9A,WT1,CITED1,SIX1,CRABP2,HMGA2,TENM4,TIAM1,HEY1,SLIT1,VASH2,LRP4,ROBO1,PAX2,HAS2,FZD2,TMEM100,SIX2,HDAC2
GO: Biological Process	GO:0051101	regulation of DNA binding			0.0003219	1	0.003248	0.02952	10	141	SOX11,HJURP,HMGB2,NEK2,NME1,FOXC1,HMGA2,HEY1,KDM1A,HDAC2
GO: Biological Process	GO:0016445	somatic diversification of immunoglobulins			0.0003255	1	0.003277	0.02979	7	70	UNG,TCF3,NSD2,MSH2,MSH6,EXO1,PRKDC
GO: Biological Process	GO:0007144	female meiosis I			0.0003368	1	0.003337	0.03033	3	8	TRIP13,AURKA,FBXO5
GO: Biological Process	GO:1904746	negative regulation of apoptotic process involved in development			0.0003368	1	0.003337	0.03033	3	8	FOXC1,WT1,PAX2
GO: Biological Process	GO:0085020	protein K6-linked ubiquitination			0.0003368	1	0.003337	0.03033	3	8	BARD1,BRCA1,UBE2S
GO: Biological Process	GO:0090306	spindle assembly involved in meiosis			0.0003368	1	0.003337	0.03033	3	8	AURKA,FBXO5,ASPM
GO: Biological Process	GO:1900262	regulation of DNA-directed DNA polymerase activity			0.0003368	1	0.003337	0.03033	3	8	DSCC1,RFC3,RFC4
GO: Biological Process	GO:1900264	positive regulation of DNA-directed DNA polymerase activity			0.0003368	1	0.003337	0.03033	3	8	DSCC1,RFC3,RFC4
GO: Biological Process	GO:0016321	female meiosis chromosome segregation			0.0003368	1	0.003337	0.03033	3	8	TTK,NCAPH,TOP2A
GO: Biological Process	GO:0048752	semicircular canal morphogenesis			0.0003368	1	0.003337	0.03033	3	8	EYA1,HOXA1,CHD7
GO: Biological Process	GO:0003338	metanephros morphogenesis			0.0003402	1	0.003362	0.03056	5	33	SALL1,WT1,CITED1,PAX2,SIX2
GO: Biological Process	GO:0045814	negative regulation of gene expression, epigenetic			0.0003407	1	0.003362	0.03056	10	142	EZH2,CDC45,JARID2,MACROH2A2,DNMT3A,RBBP4,ATAD2,KDM1A,HDAC2,HELLS
GO: Biological Process	GO:0007057	spindle assembly involved in female meiosis I			0.0003541	1	0.003474	0.03157	2	2	AURKA,FBXO5
GO: Biological Process	GO:2000620	positive regulation of histone H4-K16 acetylation			0.0003541	1	0.003474	0.03157	2	2	BRCA1,AUTS2
GO: Biological Process	GO:0035332	positive regulation of hippo signaling			0.0003541	1	0.003474	0.03157	2	2	SOX11,DLG5
GO: Biological Process	GO:0009880	embryonic pattern specification			0.0003554	1	0.00348	0.03163	7	71	MEOX1,PGAP1,WT1,CITED1,STIL,CXXC4,TCF7L1
GO: Biological Process	GO:0007492	endoderm development			0.0003594	1	0.003512	0.03192	13	227	TGIF2,EYA1,FZD7,HOXA11,GPC3,FGF8,FOXC1,TCF3,ITGA8,HMGA2,TENM4,PAX2,SIX2
GO: Biological Process	GO:0021543	pallium development			0.0003611	1	0.003522	0.03201	12	198	MDK,EZH2,CDK5R1,ASPM,KIF14,FGF8,NME1,NPY,H2AX,ROBO1,KDM1A,HDAC2
GO: Biological Process	GO:0072077	renal vesicle morphogenesis			0.0003705	1	0.003593	0.03265	4	19	SALL1,CITED1,PAX2,SIX2
GO: Biological Process	GO:0090185	negative regulation of kidney development			0.0003705	1	0.003593	0.03265	4	19	SALL1,WT1,CITED1,PAX2
GO: Biological Process	GO:0033599	regulation of mammary gland epithelial cell proliferation			0.0003705	1	0.003593	0.03265	4	19	KDM5B,ETV4,HOXA5,ROBO1
GO: Biological Process	GO:0060840	artery development			0.0003733	1	0.003612	0.03283	9	118	EYA1,MDK,HOXA1,FGF8,FOXC1,CHD7,SIX1,HEY1,ROBO1
GO: Biological Process	GO:0120035	regulation of plasma membrane bounded cell projection organization			0.0003772	1	0.003643	0.03311	30	821	DLG5,MAP2,MYO10,ATP8A2,TUBB2B,DBN1,MDK,EZH2,CHN1,CDK5R1,PTPRG,NRXN1,SYT1,ITM2C,NME1,RANBP1,PPP1R9A,ENC1,INPP5F,CRABP2,TBC1D8,TIAM1,SLIT1,AUTS2,LRP4,ROBO1,ELAVL4,CDC20,KDM1A,HDAC2
GO: Biological Process	GO:0001889	liver development			0.0003809	1	0.003672	0.03337	11	171	MDK,EZH2,TYMS,AURKA,JARID2,CADM1,MKI67,FOXM1,E2F8,ASNS,PCNA
GO: Biological Process	GO:0060795	cell fate commitment involved in formation of primary germ layer			0.0003928	1	0.003772	0.03428	5	34	EYA1,FZD7,HOXA11,PAX2,SIX2
GO: Biological Process	GO:0044818	mitotic G2/M transition checkpoint			0.0003928	1	0.003772	0.03428	5	34	BLM,BRCA1,HMGA2,CDK1,CDC6
GO: Biological Process	GO:0000731	DNA synthesis involved in DNA repair			0.0004004	1	0.003838	0.03488	6	52	PCLAF,POLE2,DTL,RFC3,RFC4,PCNA
GO: Biological Process	GO:0021537	telencephalon development			0.0004018	1	0.003843	0.03493	15	291	MDK,EZH2,CDK5R1,SALL1,ASPM,KIF14,FGF8,NME1,NPY,CHD7,SLIT1,H2AX,ROBO1,KDM1A,HDAC2
GO: Biological Process	GO:0031099	regeneration			0.0004074	1	0.003889	0.03535	13	230	MDK,EZH2,NREP,TYMS,FZD7,AURKA,DHFR,INPP5F,PPAT,CCNA2,CCNB1,CDK1,PCNA
GO: Biological Process	GO:0060537	muscle tissue development			0.0004169	1	0.003972	0.0361	21	493	SOX11,CENPF,NCAM1,EYA1,CHRNA1,MEIS1,FZD7,JARID2,HOXD10,MYL6B,FGF8,FOXC1,WT1,ITGA8,CHD7,SIX1,CCNB1,TENM4,HEY1,CDK1,HDAC2
GO: Biological Process	GO:0010638	positive regulation of organelle organization			0.0004235	1	0.004027	0.03661	26	675	NUSAP1,CENPE,DLGAP5,AURKA,JARID2,NEK2,CDK5R1,FBXO5,BRCA1,FEN1,SYT1,FGF8,MLLT11,WASF1,PSRC1,RANBP1,UBE2C,BIRC5,EDN3,SPAG5,CCNB1,AUTS2,PLK4,KDM1A,MYB,AURKB
GO: Biological Process	GO:0061008	hepaticobiliary system development			0.0004415	1	0.004191	0.03809	11	174	MDK,EZH2,TYMS,AURKA,JARID2,CADM1,MKI67,FOXM1,E2F8,ASNS,PCNA
GO: Biological Process	GO:0009954	proximal/distal pattern formation			0.0004513	1	0.004276	0.03887	5	35	HOXA10,HOXA11,HOXD10,HOXD11,LRP4
GO: Biological Process	GO:0042276	error-prone translesion synthesis			0.0004564	1	0.004308	0.03915	4	20	POLE2,RFC3,RFC4,PCNA
GO: Biological Process	GO:0016446	somatic hypermutation of immunoglobulin genes			0.0004564	1	0.004308	0.03915	4	20	UNG,MSH2,MSH6,EXO1
GO: Biological Process	GO:0018205	peptidyl-lysine modification			0.0004588	1	0.004309	0.03916	19	427	ACTL6A,CHEK1,EYA1,BCOR,EZH2,JARID2,BRCA1,NNAT,TAF5,NUP160,TCF3,RAE1,NSD2,SUV39H2,YEATS4,AUTS2,KDM1A,HDAC2,MYB
GO: Biological Process	GO:0031344	regulation of cell projection organization			0.0004605	1	0.004309	0.03916	30	831	DLG5,MAP2,MYO10,ATP8A2,TUBB2B,DBN1,MDK,EZH2,CHN1,CDK5R1,PTPRG,NRXN1,SYT1,ITM2C,NME1,RANBP1,PPP1R9A,ENC1,INPP5F,CRABP2,TBC1D8,TIAM1,SLIT1,AUTS2,LRP4,ROBO1,ELAVL4,CDC20,KDM1A,HDAC2
GO: Biological Process	GO:0071229	cellular response to acid chemical			0.0004607	1	0.004309	0.03916	13	233	BRINP1,HOXA1,HOXA2,FZD7,NME1,DNMT3A,RANBP1,SIX1,CCNB1,FZD10,PAX2,HDAC2,MYB
GO: Biological Process	GO:0048639	positive regulation of developmental growth			0.0004607	1	0.004309	0.03916	13	233	CACNA2D2,ATP8A2,NCAM1,DBN1,SYT1,FGF8,WT1,CHD7,CRABP2,CCNB1,HMGA2,CDK1,PRKDC
GO: Biological Process	GO:0014070	response to organic cyclic compound			0.0004608	1	0.004309	0.03916	36	1068	KIF18A,CDO1,NASP,HMGB2,NCAM1,MDK,EZH2,ADCY2,BLM,TYMS,BRCA1,DHFR,FGF8,NME1,DNMT3A,RAD51,RANBP1,RAE1,WT1,APEX1,CITED1,SIX1,SKP2,CCNA2,CCNB1,CCNE1,HMGA2,TIAM1,ASNS,TMF1,H2AZ1,CDK1,KDM1A,PCNA,CDK2,HDAC2
GO: Biological Process	GO:0071479	cellular response to ionizing radiation			0.0004977	1	0.004618	0.04198	7	75	BLM,RAD51,ECT2,RAD51AP1,HMGA2,H2AX,KDM1A
GO: Biological Process	GO:1901993	regulation of meiotic cell cycle phase transition			0.0004982	1	0.004618	0.04198	3	9	TTK,CDC25A,CDC25C
GO: Biological Process	GO:0003339	regulation of mesenchymal to epithelial transition involved in metanephros morphogenesis			0.0004982	1	0.004618	0.04198	3	9	SALL1,CITED1,PAX2
GO: Biological Process	GO:0044771	meiotic cell cycle phase transition			0.0004982	1	0.004618	0.04198	3	9	TTK,CDC25A,CDC25C
GO: Biological Process	GO:0010972	negative regulation of G2/M transition of mitotic cell cycle			0.0004986	1	0.004618	0.04198	8	98	CHEK1,BLM,AURKA,BRCA1,HMGA2,CDK1,CDC6,AURKB
GO: Biological Process	GO:0050673	epithelial cell proliferation			0.0005009	1	0.004631	0.04209	21	500	SOX11,KDM5B,ETV4,HMGB2,DLK1,EYA1,MDK,HOXA5,FZD7,GPC3,MKI67,NME1,BIRC5,SIX1,HMGA2,HEY1,VASH2,ROBO1,PAX2,PRKDC,HAS2
GO: Biological Process	GO:0019886	antigen processing and presentation of exogenous peptide antigen via MHC class II			0.0005337	1	0.004926	0.04477	8	99	KIF18A,CENPE,KIF4A,KIF15,KIF11,KIF2C,KIF23,RACGAP1
GO: Biological Process	GO:0048646	anatomical structure formation involved in morphogenesis			0.0005365	1	0.004942	0.04492	43	1365	SOX11,TGIF2,ATP8A2,ACTL6A,EYA1,MDK,MEIS1,HOXA1,MEOX1,HOXA5,FZD7,HOXA7,HOXA11,CDK5R1,SALL1,GPC3,BRCA1,NRXN1,HOXD11,FGF8,FOXC1,FOXD1,COL2A1,TCF3,FZD3,WT1,ITGA8,STIL,SIX1,E2F8,HMGA2,TENM4,HEY1,DLL3,VASH2,TMF1,ROBO1,PAX2,PRKDC,FZD2,TMEM100,SIX2,HDAC2
GO: Biological Process	GO:0001710	mesodermal cell fate commitment			0.0005555	1	0.005098	0.04634	4	21	EYA1,HOXA11,PAX2,SIX2
GO: Biological Process	GO:0002566	somatic diversification of immune receptors via somatic mutation			0.0005555	1	0.005098	0.04634	4	21	UNG,MSH2,MSH6,EXO1
GO: Biological Process	GO:0014706	striated muscle tissue development			0.0005914	1	0.005417	0.04924	20	471	SOX11,CENPF,NCAM1,EYA1,CHRNA1,MEIS1,FZD7,JARID2,HOXD10,MYL6B,FGF8,FOXC1,WT1,CHD7,SIX1,CCNB1,TENM4,HEY1,CDK1,HDAC2
GO: Biological Process	GO:0071495	cellular response to endogenous stimulus			0.0005939	1	0.00543	0.04935	47	1541	SOX11,KIF18A,KDM5B,BRIP1,PEG10,ZNF423,MCM7,DBN1,EZH2,NREP,ADCY2,BLM,CDK5R1,LYPD1,GPC3,BRCA1,NRXN1,FGF8,TIMELESS,WASF1,FOXC1,FOXD1,DNMT3A,COL2A1,RAD51,WT1,ITGA8,APEX1,CITED1,PPAT,SIX1,SKP2,CCNA2,CCNE1,HMGA2,TIA1,ASNS,H2AZ1,SMARCC1,PAX2,PRKDC,HAS2,CDC6,TMEM100,KDM1A,CDK2,HDAC2
GO: Biological Process	GO:0061647	histone H3-K9 modification			0.0005999	1	0.005475	0.04977	6	56	CHEK1,JARID2,BRCA1,SUV39H2,KDM1A,MYB
GO: Biological Process	GO:0035909	aorta morphogenesis			0.0006666	1	0.006062	0.0551	5	38	EYA1,FGF8,CHD7,SIX1,HEY1
GO: Biological Process	GO:0006298	mismatch repair			0.0006666	1	0.006062	0.0551	5	38	RNASEH2A,MSH2,MSH6,EXO1,PCNA
GO: Biological Process	GO:0051261	protein depolymerization			0.0006765	1	0.00614	0.05581	9	128	KIF18A,MAP2,ADD2,KIF14,KIF2C,SH3GL3,STMN1,CKAP2,KIF18B
GO: Biological Process	GO:0002495	antigen processing and presentation of peptide antigen via MHC class II			0.0006951	1	0.006297	0.05724	8	103	KIF18A,CENPE,KIF4A,KIF15,KIF11,KIF2C,KIF23,RACGAP1
GO: Biological Process	GO:0034720	histone H3-K4 demethylation			0.0007019	1	0.006313	0.05738	3	10	KDM5B,JARID2,KDM1A
GO: Biological Process	GO:0032875	regulation of DNA endoreduplication			0.0007019	1	0.006313	0.05738	3	10	FBXO5,E2F8,MSH6
GO: Biological Process	GO:0060872	semicircular canal development			0.0007019	1	0.006313	0.05738	3	10	EYA1,HOXA1,CHD7
GO: Biological Process	GO:0042473	outer ear morphogenesis			0.0007019	1	0.006313	0.05738	3	10	EYA1,HOXA1,SALL1
GO: Biological Process	GO:1901701	cellular response to oxygen-containing compound			0.0007091	1	0.006366	0.05787	41	1300	KIF18A,BRIP1,HMGB2,BRINP1,EZH2,ADCY2,HOXA1,HOXA2,BLM,FZD7,CDK5R1,LYPD1,BRCA1,NRXN1,DHFR,TIMELESS,NME1,DNMT3A,RAD51,RANBP1,WT1,APEX1,BIRC5,PPAT,SIX1,ECT2,CCNA2,CCNB1,TIAM1,H2AZ1,SMARCC1,FZD10,PAX2,CDK1,PRKDC,CDC6,KDM1A,PCNA,CDK2,HDAC2,MYB
GO: Biological Process	GO:0090305	nucleic acid phosphodiester bond hydrolysis			0.0007132	1	0.006392	0.0581	17	374	BRIP1,BARD1,HMGB2,BLM,BRCA1,PGAP1,FEN1,NME1,DNA2,RNASEH2A,APEX1,RFC3,RFC4,HMGA2,EXO1,TOP2A,PCNA
GO: Biological Process	GO:0007517	muscle organ development			0.0007285	1	0.006517	0.05924	20	479	SOX11,CENPF,ETV1,NCAM1,CHRNA1,MEIS1,FZD7,JARID2,HOXD10,MYL6B,FGF8,FOXC1,WT1,CHD7,SIX1,CCNB1,HEY1,CDK1,FZD2,HDAC2
GO: Biological Process	GO:0046677	response to antibiotic			0.0007346	1	0.006558	0.05961	17	375	CDO1,KDM5B,EZH2,ADCY2,HOXA1,TYMS,TIMELESS,DNMT3A,RANBP1,APEX1,ECT2,PAX2,CDK1,KDM1A,PCNA,HDAC2,MYB
GO: Biological Process	GO:0031100	animal organ regeneration			0.0007357	1	0.006558	0.05961	7	80	EZH2,TYMS,AURKA,PPAT,CCNA2,CDK1,PCNA
GO: Biological Process	GO:0002504	antigen processing and presentation of peptide or polysaccharide antigen via MHC class II			0.000741	1	0.006593	0.05993	8	104	KIF18A,CENPE,KIF4A,KIF15,KIF11,KIF2C,KIF23,RACGAP1
GO: Biological Process	GO:0007610	behavior			0.0007525	1	0.006653	0.06047	27	740	ATP8A2,DACH1,ETV1,ETV5,NCAM1,BRINP1,DBN1,MDK,CHRNA5,MEIS1,NMU,HOXA1,LYPD1,NRXN1,HOXD10,UCHL1,FEN1,NPY,NOVA1,NPTX2,SOBP,ITGA8,CHD7,INPP5F,AUTS2,ELAVL4,HDAC2
GO: Biological Process	GO:0007099	centriole replication			0.0007531	1	0.006653	0.06047	5	39	CEP76,BRCA1,STIL,PLK4,CDK2
GO: Biological Process	GO:0042769	DNA damage response, detection of DNA damage			0.0007531	1	0.006653	0.06047	5	39	DTL,RFC3,RFC4,HMGA2,PCNA
GO: Biological Process	GO:0021772	olfactory bulb development			0.0007531	1	0.006653	0.06047	5	39	SALL1,KIF14,CHD7,SLIT1,ROBO1
GO: Biological Process	GO:0010721	negative regulation of cell development			0.0007722	1	0.00681	0.0619	18	411	MYCN,SOX11,MAP2,BRINP1,MEIS1,HOXA2,CDK5R1,PTPRG,ASPM,ITM2C,INPP5F,HMGA2,HEY1,SLIT1,DLL3,LRP4,KDM1A,HDAC2
GO: Biological Process	GO:0043549	regulation of kinase activity			0.0007816	1	0.006881	0.06254	33	978	CDKN3,CENPE,EZH2,ADCY2,BLM,CKS1B,CKS2,CDK5R1,NRXN1,DBF4,UCHL1,KIF14,PSRC1,TCF3,PPP1R9A,CCNJ,STIL,ECT2,EDN3,CCNA2,CCNB1,CCNE1,HMGA2,TIAM1,CCNB2,CCNE2,TPX2,FZD10,ROBO1,CDK1,CDC6,CDC25A,CDC25C
GO: Biological Process	GO:0001708	cell fate specification			0.0007893	1	0.006937	0.06305	8	105	EYA1,FZD7,HOXA11,HOXD10,SIX1,TENM4,PAX2,SIX2
GO: Biological Process	GO:0046599	regulation of centriole replication			0.0007981	1	0.007001	0.06363	4	23	CEP76,BRCA1,STIL,PLK4
GO: Biological Process	GO:0060411	cardiac septum morphogenesis			0.000853	1	0.00747	0.0679	7	82	SOX11,FGF8,NSD2,CHD7,HEY1,ROBO1,FZD2
GO: Biological Process	GO:0043392	negative regulation of DNA binding			0.0008691	1	0.007597	0.06905	6	60	SOX11,NEK2,HMGA2,HEY1,KDM1A,HDAC2
GO: Biological Process	GO:0034614	cellular response to reactive oxygen species			0.0008791	1	0.007672	0.06973	11	189	EZH2,DHFR,APEX1,ECT2,CCNA2,PAX2,CDK1,PCNA,CDK2,HDAC2,MYB
GO: Biological Process	GO:0048863	stem cell differentiation			0.0008958	1	0.007804	0.07093	14	282	SOX11,ETV4,MEOX1,HOXA7,JARID2,HOXD4,FOXC1,TCF3,NRTN,EDN3,HMGA2,PAX2,TCF7L1,MYB
GO: Biological Process	GO:0072215	regulation of metanephros development			0.0009437	1	0.008192	0.07446	4	24	SALL1,WT1,CITED1,PAX2
GO: Biological Process	GO:0042474	middle ear morphogenesis			0.0009437	1	0.008192	0.07446	4	24	EYA1,HOXA2,SIX1,SIX2
GO: Biological Process	GO:0021988	olfactory lobe development			0.0009508	1	0.008219	0.0747	5	41	SALL1,KIF14,CHD7,SLIT1,ROBO1
GO: Biological Process	GO:0045005	DNA-dependent DNA replication maintenance of fidelity			0.0009508	1	0.008219	0.0747	5	41	BLM,TIMELESS,DNA2,RAD51,PCNA
GO: Biological Process	GO:0042023	DNA endoreduplication			0.0009517	1	0.008219	0.0747	3	11	FBXO5,E2F8,MSH6
GO: Biological Process	GO:0042063	gliogenesis			0.001014	1	0.008722	0.07928	16	352	MYCN,SOX11,WASF3,ETV5,MDK,EZH2,CDK5R1,PLAG1,HMGA2,TENM4,TIAM1,DLL3,PAX2,CDK1,HDAC2,MYB
GO: Biological Process	GO:0110030	regulation of G2/MI transition of meiotic cell cycle			0.001029	1	0.008722	0.07928	2	3	CDC25A,CDC25C
GO: Biological Process	GO:0110032	positive regulation of G2/MI transition of meiotic cell cycle			0.001029	1	0.008722	0.07928	2	3	CDC25A,CDC25C
GO: Biological Process	GO:1905463	negative regulation of DNA duplex unwinding			0.001029	1	0.008722	0.07928	2	3	MCM2,TOP2A
GO: Biological Process	GO:2000384	negative regulation of ectoderm development			0.001029	1	0.008722	0.07928	2	3	FZD7,SALL1
GO: Biological Process	GO:2000383	regulation of ectoderm development			0.001029	1	0.008722	0.07928	2	3	FZD7,SALL1
GO: Biological Process	GO:0008315	G2/MI transition of meiotic cell cycle			0.001029	1	0.008722	0.07928	2	3	CDC25A,CDC25C
GO: Biological Process	GO:1902990	mitotic telomere maintenance via semi-conservative replication			0.001029	1	0.008722	0.07928	2	3	DNA2,PCNA
GO: Biological Process	GO:0072309	mesenchymal stem cell maintenance involved in metanephric nephron morphogenesis			0.001029	1	0.008722	0.07928	2	3	SALL1,PAX2
GO: Biological Process	GO:2000845	positive regulation of testosterone secretion			0.001029	1	0.008722	0.07928	2	3	TMF1,MYB
GO: Biological Process	GO:0071163	DNA replication preinitiation complex assembly			0.001029	1	0.008722	0.07928	2	3	CDC45,GMNN
GO: Biological Process	GO:2001252	positive regulation of chromosome organization			0.001043	1	0.008822	0.08019	11	193	CENPE,DLGAP5,JARID2,NEK2,BRCA1,FEN1,CCNB1,AUTS2,KDM1A,MYB,AURKB
GO: Biological Process	GO:0110111	negative regulation of animal organ morphogenesis			0.001063	1	0.008931	0.08117	5	42	BCOR,SALL1,FOXC1,CITED1,PAX2
GO: Biological Process	GO:0000578	embryonic axis specification			0.001063	1	0.008931	0.08117	5	42	WT1,CITED1,STIL,CXXC4,TCF7L1
GO: Biological Process	GO:0098534	centriole assembly			0.001063	1	0.008931	0.08117	5	42	CEP76,BRCA1,STIL,PLK4,CDK2
GO: Biological Process	GO:0051567	histone H3-K9 methylation			0.001063	1	0.008931	0.08117	5	42	JARID2,BRCA1,SUV39H2,KDM1A,MYB
GO: Biological Process	GO:2000241	regulation of reproductive process			0.001088	1	0.009123	0.08292	11	194	TRIP13,TTK,AURKA,HOXC4,FBXO5,ASPM,WT1,CDC20,CDC25A,CDC25C,HDAC2
GO: Biological Process	GO:0051241	negative regulation of multicellular organismal process			0.001093	1	0.009151	0.08317	45	1500	MYCN,SOX11,MAP2,PATZ1,ZNF423,LAPTM4B,ETV4,HMGB3,BRINP1,DLK1,DBN1,BCOR,MDK,MEIS1,NMU,HOXA2,HOXA5,FZD7,HOXA7,JARID2,CDK5R1,SALL1,PTPRG,ASPM,PRMT1,FGF8,ITM2C,NME1,FOXC1,NOVA1,TCF3,FZD3,WT1,CITED1,INPP5F,HMGA2,TIA1,HEY1,SLIT1,DLL3,LRP4,ROBO1,PAX2,KDM1A,HDAC2
GO: Biological Process	GO:0061213	positive regulation of mesonephros development			0.001107	1	0.009224	0.08384	4	25	SALL1,WT1,SIX1,PAX2
GO: Biological Process	GO:0090189	regulation of branching involved in ureteric bud morphogenesis			0.001107	1	0.009224	0.08384	4	25	SALL1,SIX1,PAX2,SIX2
GO: Biological Process	GO:0031061	negative regulation of histone methylation			0.001107	1	0.009224	0.08384	4	25	BCOR,JARID2,BRCA1,KDM1A
GO: Biological Process	GO:0060419	heart growth			0.001156	1	0.009619	0.08743	9	138	NCAM1,MEIS1,JARID2,FOXC1,WT1,CCNB1,TENM4,CDK1,HDAC2
GO: Biological Process	GO:0009112	nucleobase metabolic process			0.001185	1	0.009837	0.08941	5	43	RRM1,TYMS,DPYSL4,PPAT,KDM1A
GO: Biological Process	GO:0072091	regulation of stem cell proliferation			0.001211	1	0.01004	0.09126	7	87	SOX11,HMGB2,ASPM,FZD3,CITED1,HMGA2,KDM1A
GO: Biological Process	GO:0045860	positive regulation of protein kinase activity			0.001219	1	0.01007	0.09153	23	611	CENPE,EZH2,ADCY2,CKS1B,CKS2,CDK5R1,NRXN1,DBF4,KIF14,PSRC1,TCF3,PPP1R9A,STIL,ECT2,EDN3,CCNB1,HMGA2,TIAM1,TPX2,FZD10,ROBO1,CDK1,CDC6
GO: Biological Process	GO:0045143	homologous chromosome segregation			0.001223	1	0.01007	0.09153	6	64	PTTG1,BRIP1,TRIP13,PTTG3P,CCNE1,CCNE2
GO: Biological Process	GO:0060043	regulation of cardiac muscle cell proliferation			0.001223	1	0.01007	0.09153	6	64	NCAM1,MEIS1,JARID2,CCNB1,CDK1,HDAC2
GO: Biological Process	GO:0045604	regulation of epidermal cell differentiation			0.001223	1	0.01007	0.09153	6	64	MYCN,EZH2,HOXA7,MACROH2A2,FOXC1,HEY1
GO: Biological Process	GO:0006479	protein methylation			0.001231	1	0.01011	0.09185	11	197	BCOR,EZH2,JARID2,BRCA1,PRMT1,NSD2,SUV39H2,AUTS2,KDM1A,HDAC2,MYB
GO: Biological Process	GO:0008213	protein alkylation			0.001231	1	0.01011	0.09185	11	197	BCOR,EZH2,JARID2,BRCA1,PRMT1,NSD2,SUV39H2,AUTS2,KDM1A,HDAC2,MYB
GO: Biological Process	GO:0051095	regulation of helicase activity			0.001251	1	0.01024	0.09306	3	12	MCM2,MSH2,MSH6
GO: Biological Process	GO:1904668	positive regulation of ubiquitin protein ligase activity			0.001251	1	0.01024	0.09306	3	12	UBE2S,UBE2C,CDC20
GO: Biological Process	GO:0072202	cell differentiation involved in metanephros development			0.001289	1	0.01052	0.09564	4	26	SALL1,CITED1,PAX2,SIX2
GO: Biological Process	GO:0003007	heart morphogenesis			0.00129	1	0.01052	0.09564	14	293	SOX11,EYA1,FGF8,FOXC1,COL2A1,NSD2,CHD7,STIL,SIX1,HEY1,ROBO1,HAS2,FZD2,TMEM100
GO: Biological Process	GO:0009416	response to light stimulus			0.001356	1	0.01104	0.1003	16	362	PCLAF,ATP8A2,PBK,CHEK1,NMU,HOXA1,H2AW,FEN1,DTL,MSH2,MSH6,ASNS,CDC25A,KDM1A,PCNA,AURKB
GO: Biological Process	GO:0042325	regulation of phosphorylation			0.001405	1	0.01142	0.1038	51	1781	CDKN3,CENPE,PBK,BARD1,MCM7,EZH2,TTK,ADCY2,GFRA1,BLM,FZD7,CKS1B,CKS2,CDK5R1,NRXN1,DBF4,UCHL1,KIF14,PRMT1,FGF8,NUP160,PSRC1,RAD51,FOXM1,TCF3,CHRNA9,RAE1,PPP1R9A,CCNJ,STIL,INPP5F,ECT2,EDN3,CCNA2,CCNB1,CCNE1,HMGA2,LMNB1,TIAM1,CCNB2,CCNE2,TPX2,LRP4,FZD10,ROBO1,CDK1,PRKDC,CDC6,CDC25A,CDC25C,HDAC2
GO: Biological Process	GO:0070301	cellular response to hydrogen peroxide			0.001426	1	0.01157	0.1052	8	115	EZH2,APEX1,ECT2,PAX2,CDK1,PCNA,HDAC2,MYB
GO: Biological Process	GO:0007062	sister chromatid cohesion			0.001436	1	0.0116	0.1054	6	66	PTTG1,BUB1,BUB1B,FEN1,DSCC1,CDC20
GO: Biological Process	GO:0060688	regulation of morphogenesis of a branching structure			0.001436	1	0.0116	0.1054	6	66	ETV5,MDK,SALL1,SIX1,PAX2,SIX2
GO: Biological Process	GO:1902808	positive regulation of cell cycle G1/S phase transition			0.001436	1	0.0116	0.1054	6	66	EZH2,CDC45,DBF4,APEX1,CCNE1,CDC6
GO: Biological Process	GO:0034644	cellular response to UV			0.001477	1	0.01191	0.1082	7	90	PBK,CHEK1,H2AW,CDC25A,KDM1A,PCNA,AURKB
GO: Biological Process	GO:0045995	regulation of embryonic development			0.001483	1	0.01194	0.1085	9	143	TGIF2,FZD7,FZD3,SIX1,TENM4,RACGAP1,CDK1,FZD2,KDM1A
GO: Biological Process	GO:0080135	regulation of cellular response to stress			0.00149	1	0.01196	0.1088	28	815	PBK,CHEK1,EYA1,BLM,FZD7,AUNIP,FBXO5,BRCA1,DHFR,PRMT1,TIMELESS,PARPBP,PCBP4,NUP160,RAD51,FOXM1,RAE1,NSD2,INPP5F,RAD51AP1,HMGA2,LMNB1,TIAM1,H2AX,FZD10,PRKDC,KDM1A,PCNA
GO: Biological Process	GO:2001032	regulation of double-strand break repair via nonhomologous end joining			0.001491	1	0.01196	0.1088	4	27	AUNIP,NSD2,HMGA2,PRKDC
GO: Biological Process	GO:0043085	positive regulation of catalytic activity			0.001501	1	0.01202	0.1093	47	1611	CENPE,HMGB2,ARHGAP11A,EZH2,CHN1,ADCY2,CKS1B,CKS2,NEK2,CDK5R1,NRXN1,DBF4,DHFR,DNAJC9,KIF14,UBE2S,DSCC1,PSRC1,RANBP1,TCF3,PPP1R9A,UBE2C,DEPDC1,MSH2,STIL,RFC3,RFC4,NCAPH,ECT2,RGS7,EDN3,CCNB1,TBC1D8,MSH6,HMGA2,TIAM1,TPX2,RACGAP1,FZD10,ROBO1,RGS17,CDK1,CDC6,CDC20,FZD2,PCNA,AURKB
GO: Biological Process	GO:0051098	regulation of binding			0.001539	1	0.0123	0.1118	18	437	SOX11,MAP2,HJURP,HMGB2,ADD2,BLM,AURKA,NEK2,NME1,FOXC1,STMN1,GMNN,HMGA2,TIAM1,HEY1,KDM1A,HDAC2,AURKB
GO: Biological Process	GO:0006304	DNA modification			0.001557	1	0.01243	0.113	9	144	EZH2,BRCA1,UNG,DNMT3A,MIS18A,WT1,APEX1,APOBEC3B,HELLS
GO: Biological Process	GO:0014015	positive regulation of gliogenesis			0.001575	1	0.01255	0.1141	7	91	ETV5,MDK,PLAG1,TENM4,TIAM1,HDAC2,MYB
GO: Biological Process	GO:0071902	positive regulation of protein serine/threonine kinase activity			0.001604	1	0.01266	0.1151	16	368	EZH2,CKS1B,CKS2,CDK5R1,NRXN1,DBF4,PSRC1,STIL,EDN3,CCNB1,HMGA2,TIAM1,FZD10,ROBO1,CDK1,CDC6
GO: Biological Process	GO:0051315	attachment of mitotic spindle microtubules to kinetochore			0.001605	1	0.01266	0.1151	3	13	CENPE,NDC80,KIF2C
GO: Biological Process	GO:0060272	embryonic skeletal joint morphogenesis			0.001605	1	0.01266	0.1151	3	13	HOXA11,HOXD11,COL2A1
GO: Biological Process	GO:0072711	cellular response to hydroxyurea			0.001605	1	0.01266	0.1151	3	13	BLM,TIMELESS,RAD51
GO: Biological Process	GO:0045835	negative regulation of meiotic nuclear division			0.001605	1	0.01266	0.1151	3	13	TRIP13,TTK,FBXO5
GO: Biological Process	GO:0051574	positive regulation of histone H3-K9 methylation			0.001605	1	0.01266	0.1151	3	13	JARID2,BRCA1,MYB
GO: Biological Process	GO:0035136	forelimb morphogenesis			0.001612	1	0.01266	0.1151	5	46	HOXA11,SALL1,HOXD10,HOXD11,CRABP2
GO: Biological Process	GO:0035137	hindlimb morphogenesis			0.001612	1	0.01266	0.1151	5	46	SALL1,GPC3,HOXD10,FGF8,CHD7
GO: Biological Process	GO:0090184	positive regulation of kidney development			0.001612	1	0.01266	0.1151	5	46	SALL1,FOXD1,WT1,SIX1,PAX2
GO: Biological Process	GO:0072089	stem cell proliferation			0.001633	1	0.01281	0.1164	9	145	SOX11,HMGB2,ASPM,FZD3,CITED1,HMGA2,RACGAP1,SIX2,KDM1A
GO: Biological Process	GO:1901700	response to oxygen-containing compound			0.001654	1	0.01295	0.1177	52	1839	KIF18A,CDO1,BRIP1,NASP,HMGB2,NCAM1,BRINP1,EZH2,ADCY2,STAT4,HOXA1,HOXA2,BLM,TYMS,FZD7,MEST,CDK5R1,LYPD1,BRCA1,NRXN1,DHFR,TIMELESS,NNAT,NME1,DNMT3A,RAD51,RANBP1,TCF3,WT1,APEX1,BIRC5,CITED1,PPAT,SIX1,ECT2,CCNA2,CCNB1,DNAAF2,TIAM1,ASNS,H2AZ1,SMARCC1,FZD10,PAX2,CDK1,PRKDC,CDC6,KDM1A,PCNA,CDK2,HDAC2,MYB
GO: Biological Process	GO:0051298	centrosome duplication			0.001677	1	0.0131	0.1191	6	68	CEP76,BRCA1,SAC3D1,STIL,PLK4,CDK2
GO: Biological Process	GO:0035904	aorta development			0.001677	1	0.0131	0.1191	6	68	EYA1,FGF8,CHD7,SIX1,HEY1,ROBO1
GO: Biological Process	GO:0010976	positive regulation of neuron projection development			0.001695	1	0.01321	0.1201	16	370	DLG5,ATP8A2,TUBB2B,DBN1,MDK,EZH2,SYT1,NME1,RANBP1,PPP1R9A,ENC1,CRABP2,TIAM1,ROBO1,ELAVL4,KDM1A
GO: Biological Process	GO:0003272	endocardial cushion formation			0.001715	1	0.01333	0.1211	4	28	FGF8,HEY1,ROBO1,TMEM100
GO: Biological Process	GO:0051570	regulation of histone H3-K9 methylation			0.001715	1	0.01333	0.1211	4	28	JARID2,BRCA1,KDM1A,MYB
GO: Biological Process	GO:0097237	cellular response to toxic substance			0.001719	1	0.01334	0.1212	13	269	EZH2,HOXA1,DHFR,TIMELESS,DNMT3A,PPP1R9A,APEX1,ECT2,PAX2,CDK1,PCNA,HDAC2,MYB
GO: Biological Process	GO:0035850	epithelial cell differentiation involved in kidney development			0.001776	1	0.01376	0.1251	5	47	SALL1,WT1,CITED1,PAX2,SIX2
GO: Biological Process	GO:0045685	regulation of glial cell differentiation			0.001786	1	0.0138	0.1254	7	93	MYCN,MDK,HMGA2,TENM4,DLL3,CDK1,HDAC2
GO: Biological Process	GO:0001932	regulation of protein phosphorylation			0.001787	1	0.0138	0.1254	47	1625	CDKN3,CENPE,PBK,EZH2,TTK,ADCY2,GFRA1,BLM,FZD7,CKS1B,CKS2,CDK5R1,NRXN1,DBF4,UCHL1,KIF14,PRMT1,FGF8,PSRC1,RAD51,FOXM1,TCF3,CHRNA9,PPP1R9A,CCNJ,STIL,INPP5F,ECT2,EDN3,CCNA2,CCNB1,CCNE1,HMGA2,LMNB1,TIAM1,CCNB2,CCNE2,TPX2,LRP4,FZD10,ROBO1,CDK1,PRKDC,CDC6,CDC25A,CDC25C,HDAC2
GO: Biological Process	GO:0055024	regulation of cardiac muscle tissue development			0.00187	1	0.01442	0.1311	8	120	NCAM1,MEIS1,FZD7,JARID2,FGF8,CCNB1,CDK1,HDAC2
GO: Biological Process	GO:2000243	positive regulation of reproductive process			0.001899	1	0.0146	0.1327	7	94	AURKA,HOXC4,FBXO5,WT1,CDC25A,CDC25C,HDAC2
GO: Biological Process	GO:0006303	double-strand break repair via nonhomologous end joining			0.001899	1	0.0146	0.1327	7	94	BARD1,AUNIP,BRCA1,NSD2,HMGA2,H2AX,PRKDC
GO: Biological Process	GO:0048511	rhythmic process			0.001929	1	0.01481	0.1346	15	340	KDM5B,MDK,EZH2,NMU,TYMS,CDK5R1,TIMELESS,DTL,SUV39H2,CDK1,PRKDC,HAS2,TOP2A,PCNA,HDAC2
GO: Biological Process	GO:0060412	ventricular septum morphogenesis			0.001953	1	0.01495	0.1359	5	48	SOX11,NSD2,HEY1,ROBO1,FZD2
GO: Biological Process	GO:0030325	adrenal gland development			0.00196	1	0.01495	0.1359	4	29	MDK,SALL1,WT1,HMGA2
GO: Biological Process	GO:0090344	negative regulation of cell aging			0.00196	1	0.01495	0.1359	4	29	FBXO5,FOXM1,HMGA2,PRKDC
GO: Biological Process	GO:0015949	nucleobase-containing small molecule interconversion			0.00196	1	0.01495	0.1359	4	29	RRM1,RRM2,TYMS,NME1
GO: Biological Process	GO:0044728	DNA methylation or demethylation			0.001971	1	0.015	0.1364	8	121	EZH2,BRCA1,DNMT3A,MIS18A,WT1,APEX1,APOBEC3B,HELLS
GO: Biological Process	GO:0072710	response to hydroxyurea			0.002014	1	0.015	0.1364	3	14	BLM,TIMELESS,RAD51
GO: Biological Process	GO:1903504	regulation of mitotic spindle checkpoint			0.002014	1	0.015	0.1364	3	14	NDC80,CCNB1,MAD2L1
GO: Biological Process	GO:0072425	signal transduction involved in G2 DNA damage checkpoint			0.002014	1	0.015	0.1364	3	14	CHEK1,BRCA1,DTL
GO: Biological Process	GO:0090266	regulation of mitotic cell cycle spindle assembly checkpoint			0.002014	1	0.015	0.1364	3	14	NDC80,CCNB1,MAD2L1
GO: Biological Process	GO:0035936	testosterone secretion			0.002033	1	0.015	0.1364	2	4	TMF1,MYB
GO: Biological Process	GO:0035983	response to trichostatin A			0.002033	1	0.015	0.1364	2	4	EZH2,HDAC2
GO: Biological Process	GO:0035984	cellular response to trichostatin A			0.002033	1	0.015	0.1364	2	4	EZH2,HDAC2
GO: Biological Process	GO:0007056	spindle assembly involved in female meiosis			0.002033	1	0.015	0.1364	2	4	AURKA,FBXO5
GO: Biological Process	GO:0007079	mitotic chromosome movement towards spindle pole			0.002033	1	0.015	0.1364	2	4	CENPE,DLGAP5
GO: Biological Process	GO:0051309	female meiosis chromosome separation			0.002033	1	0.015	0.1364	2	4	NCAPH,TOP2A
GO: Biological Process	GO:0003340	negative regulation of mesenchymal to epithelial transition involved in metanephros morphogenesis			0.002033	1	0.015	0.1364	2	4	SALL1,CITED1
GO: Biological Process	GO:1905342	positive regulation of protein localization to kinetochore			0.002033	1	0.015	0.1364	2	4	NDC80,CENPQ
GO: Biological Process	GO:1905340	regulation of protein localization to kinetochore			0.002033	1	0.015	0.1364	2	4	NDC80,CENPQ
GO: Biological Process	GO:0060574	intestinal epithelial cell maturation			0.002033	1	0.015	0.1364	2	4	HOXA5,TYMS
GO: Biological Process	GO:1900212	negative regulation of mesenchymal cell apoptotic process involved in metanephros development			0.002033	1	0.015	0.1364	2	4	WT1,PAX2
GO: Biological Process	GO:1900211	regulation of mesenchymal cell apoptotic process involved in metanephros development			0.002033	1	0.015	0.1364	2	4	WT1,PAX2
GO: Biological Process	GO:1900200	mesenchymal cell apoptotic process involved in metanephros development			0.002033	1	0.015	0.1364	2	4	WT1,PAX2
GO: Biological Process	GO:0021553	olfactory nerve development			0.002033	1	0.015	0.1364	2	4	SALL1,CHD7
GO: Biological Process	GO:0033563	dorsal/ventral axon guidance			0.002033	1	0.015	0.1364	2	4	FGF8,SLIT1
GO: Biological Process	GO:2000843	regulation of testosterone secretion			0.002033	1	0.015	0.1364	2	4	TMF1,MYB
GO: Biological Process	GO:0021569	rhombomere 3 development			0.002033	1	0.015	0.1364	2	4	HOXA1,HOXA2
GO: Biological Process	GO:0046683	response to organophosphorus			0.002061	1	0.01519	0.1381	9	150	CDO1,TYMS,NME1,WT1,APEX1,CITED1,RFC3,KDM1A,CDK2
GO: Biological Process	GO:0035265	organ growth			0.002064	1	0.01519	0.1381	12	242	CACNA2D2,NCAM1,MEIS1,JARID2,PLAG1,FGF8,FOXC1,WT1,CCNB1,TENM4,CDK1,HDAC2
GO: Biological Process	GO:0030856	regulation of epithelial cell differentiation			0.002103	1	0.01545	0.1404	10	180	MYCN,EZH2,HOXA7,SALL1,MACROH2A2,FOXC1,CITED1,HEY1,PAX2,TMEM100
GO: Biological Process	GO:0031401	positive regulation of protein modification process			0.002151	1	0.01578	0.1434	41	1379	CENPE,EZH2,TTK,ADCY2,GFRA1,FZD7,JARID2,CKS1B,CKS2,CDK5R1,BRCA1,NRXN1,DBF4,KIF14,UBE2S,PRMT1,FGF8,PSRC1,TCF3,PPP1R9A,UBE2C,STIL,ECT2,SKP2,EDN3,CCNB1,HMGA2,LMNB1,TIAM1,FANCI,TPX2,AUTS2,LRP4,FZD10,ROBO1,CDK1,CDC6,CDC20,KDM1A,HDAC2,MYB
GO: Biological Process	GO:0007281	germ cell development			0.00218	1	0.01596	0.1451	14	310	BRIP1,ETV5,HMGB2,SRPK1,MDK,TRIP13,AURKA,HOXC4,FBXO5,ASPM,WT1,MSH2,CCNB1,TMF1
GO: Biological Process	GO:0033993	response to lipid			0.002182	1	0.01596	0.1451	32	1000	KIF18A,CDO1,NASP,HMGB2,BRINP1,MDK,EZH2,ADCY2,HOXA1,HOXA2,TYMS,FZD7,MEST,BRCA1,NME1,DNMT3A,RANBP1,TCF3,RBP1,CITED1,SKP2,CCNA2,CCNB1,CCNE1,DNAAF2,HMGA2,H2AZ1,FZD10,PAX2,PCNA,HDAC2,MYB
GO: Biological Process	GO:0042733	embryonic digit morphogenesis			0.00225	1	0.01643	0.1494	6	72	MYCN,HOXA11,SALL1,HOXD11,LRP4,HDAC2
GO: Biological Process	GO:0006997	nucleus organization			0.002256	1	0.01645	0.1495	9	152	HMGB2,SRPK1,CHEK1,VRK1,CCNB1,CEP55,CCNB2,TMF1,CDK1
GO: Biological Process	GO:0010498	proteasomal protein catabolic process			0.002391	1	0.01741	0.1583	19	492	PTTG1,PBK,AURKA,FBXO5,UCHL1,BUB1B,KIF14,UBE2S,UBE2C,ENC1,SKP2,CCNB1,TMF1,SMARCC1,CDK1,CDC20,MAD2L1,CDK2,AURKB
GO: Biological Process	GO:0061448	connective tissue development			0.00245	1	0.01782	0.162	14	314	MYCN,MDK,MEX3C,HOXA5,TYMS,HOXA11,HOXC4,HOXD11,FOXD1,COL2A1,WT1,HMGA2,ZNF516,SIX2
GO: Biological Process	GO:0090737	telomere maintenance via telomere trimming			0.002483	1	0.01795	0.1632	3	15	BLM,DNA2,EXO1
GO: Biological Process	GO:0072075	metanephric mesenchyme development			0.002483	1	0.01795	0.1632	3	15	WT1,SIX1,PAX2
GO: Biological Process	GO:0090656	t-circle formation			0.002483	1	0.01795	0.1632	3	15	BLM,DNA2,EXO1
GO: Biological Process	GO:0001325	formation of extrachromosomal circular DNA			0.002483	1	0.01795	0.1632	3	15	BLM,DNA2,EXO1
GO: Biological Process	GO:0001556	oocyte maturation			0.002522	1	0.0182	0.1655	4	31	TRIP13,AURKA,FBXO5,CCNB1
GO: Biological Process	GO:0003279	cardiac septum development			0.002539	1	0.01831	0.1664	8	126	SOX11,SALL1,FGF8,NSD2,CHD7,HEY1,ROBO1,FZD2
GO: Biological Process	GO:1902275	regulation of chromatin organization			0.002546	1	0.01833	0.1666	11	216	CHEK1,BCOR,CDC45,JARID2,BRCA1,MKI67,ATAD2,CCNB1,AUTS2,KDM1A,MYB
GO: Biological Process	GO:0055026	negative regulation of cardiac muscle tissue development			0.00256	1	0.0184	0.1673	5	51	MEIS1,FZD7,JARID2,FGF8,HDAC2
GO: Biological Process	GO:0016202	regulation of striated muscle tissue development			0.002567	1	0.01843	0.1675	10	185	CENPF,NCAM1,MEIS1,FZD7,JARID2,FGF8,SIX1,CCNB1,CDK1,HDAC2
GO: Biological Process	GO:0046622	positive regulation of organ growth			0.002586	1	0.01854	0.1685	6	74	CACNA2D2,NCAM1,FGF8,WT1,CCNB1,CDK1
GO: Biological Process	GO:0018193	peptidyl-amino acid modification			0.002654	1	0.01899	0.1726	40	1352	PBK,ACTL6A,CHEK1,EYA1,BCOR,EZH2,TTK,MELK,GFRA1,CDC7,AURKA,JARID2,CDK5R1,BRCA1,NRXN1,PRMT1,FGF8,NNAT,TAF5,NUP160,TCF3,VRK1,RAE1,NSD2,TUSC3,INPP5F,SUV39H2,CCNB1,EFNA4,YEATS4,HMGA2,AUTS2,LRP4,CDK1,PRKDC,KDM1A,CDK2,HDAC2,MYB,AURKB
GO: Biological Process	GO:0043414	macromolecule methylation			0.002687	1	0.0192	0.1745	15	352	BCOR,EZH2,JARID2,BRCA1,PRMT1,DNMT3A,NSD2,MIS18A,WT1,SUV39H2,AUTS2,KDM1A,HDAC2,MYB,HELLS
GO: Biological Process	GO:0033674	positive regulation of kinase activity			0.002734	1	0.01951	0.1773	23	651	CENPE,EZH2,ADCY2,CKS1B,CKS2,CDK5R1,NRXN1,DBF4,KIF14,PSRC1,TCF3,PPP1R9A,STIL,ECT2,EDN3,CCNB1,HMGA2,TIAM1,TPX2,FZD10,ROBO1,CDK1,CDC6
GO: Biological Process	GO:0010718	positive regulation of epithelial to mesenchymal transition			0.00279	1	0.0198	0.1799	5	52	MDK,EZH2,FOXC1,TIAM1,HDAC2
GO: Biological Process	GO:0002204	somatic recombination of immunoglobulin genes involved in immune response			0.00279	1	0.0198	0.1799	5	52	UNG,NSD2,MSH2,MSH6,EXO1
GO: Biological Process	GO:0002208	somatic diversification of immunoglobulins involved in immune response			0.00279	1	0.0198	0.1799	5	52	UNG,NSD2,MSH2,MSH6,EXO1
GO: Biological Process	GO:0045190	isotype switching			0.00279	1	0.0198	0.1799	5	52	UNG,NSD2,MSH2,MSH6,EXO1
GO: Biological Process	GO:0010458	exit from mitosis			0.00284	1	0.02005	0.1823	4	32	KNTC1,UBE2S,UBE2C,BIRC5
GO: Biological Process	GO:0031297	replication fork processing			0.00284	1	0.02005	0.1823	4	32	BLM,DNA2,RAD51,PCNA
GO: Biological Process	GO:0033598	mammary gland epithelial cell proliferation			0.00284	1	0.02005	0.1823	4	32	KDM5B,ETV4,HOXA5,ROBO1
GO: Biological Process	GO:0048738	cardiac muscle tissue development			0.002842	1	0.02005	0.1823	13	285	NCAM1,MEIS1,FZD7,JARID2,FGF8,FOXC1,WT1,CHD7,CCNB1,TENM4,HEY1,CDK1,HDAC2
GO: Biological Process	GO:1901861	regulation of muscle tissue development			0.002883	1	0.02031	0.1846	10	188	CENPF,NCAM1,MEIS1,FZD7,JARID2,FGF8,SIX1,CCNB1,CDK1,HDAC2
GO: Biological Process	GO:0018105	peptidyl-serine phosphorylation			0.002907	1	0.02045	0.1859	14	320	PBK,TTK,CDC7,AURKA,CDK5R1,NRXN1,VRK1,INPP5F,CCNB1,HMGA2,CDK1,PRKDC,CDK2,AURKB
GO: Biological Process	GO:0042752	regulation of circadian rhythm			0.002938	1	0.02061	0.1873	8	129	KDM5B,EZH2,NMU,TIMELESS,SUV39H2,CDK1,PRKDC,TOP2A
GO: Biological Process	GO:0055017	cardiac muscle tissue growth			0.002938	1	0.02061	0.1873	8	129	NCAM1,MEIS1,JARID2,FOXC1,CCNB1,TENM4,CDK1,HDAC2
GO: Biological Process	GO:0098885	modification of postsynaptic actin cytoskeleton			0.003014	1	0.02101	0.1909	3	16	WASF3,WASF1,TIAM1
GO: Biological Process	GO:0000212	meiotic spindle organization			0.003014	1	0.02101	0.1909	3	16	AURKA,FBXO5,ASPM
GO: Biological Process	GO:0009263	deoxyribonucleotide biosynthetic process			0.003014	1	0.02101	0.1909	3	16	RRM1,RRM2,TYMS
GO: Biological Process	GO:0072498	embryonic skeletal joint development			0.003014	1	0.02101	0.1909	3	16	HOXA11,HOXD11,COL2A1
GO: Biological Process	GO:0000726	non-recombinational repair			0.00302	1	0.02101	0.1909	7	102	BARD1,AUNIP,BRCA1,NSD2,HMGA2,H2AX,PRKDC
GO: Biological Process	GO:0060420	regulation of heart growth			0.00302	1	0.02101	0.1909	7	102	NCAM1,MEIS1,JARID2,WT1,CCNB1,CDK1,HDAC2
GO: Biological Process	GO:0036297	interstrand cross-link repair			0.003034	1	0.02105	0.1913	5	53	RAD51,FANCL,RAD51AP1,MSH6,FANCI
GO: Biological Process	GO:0021545	cranial nerve development			0.003034	1	0.02105	0.1913	5	53	HOXA1,SALL1,CHD7,SIX1,PAX2
GO: Biological Process	GO:0046883	regulation of hormone secretion			0.003074	1	0.0213	0.1936	14	322	SOX11,KDM5B,CACNA2D2,NMU,NELL2,NRXN1,NNAT,BIRC5,CHD7,EDN3,HMGA2,TIAM1,TMF1,MYB
GO: Biological Process	GO:0006935	chemotaxis			0.003095	1	0.02141	0.1946	24	697	ETV1,ETV4,HMGB2,NCAM1,TUBB2B,MDK,CHN1,GFRA1,HOXA1,HOXA2,CDK5R1,HOXB9,NRXN1,FGF8,FOXD1,NRTN,FZD3,DPYSL4,EDN3,EFNA4,TIAM1,SLIT1,UNC5C,ROBO1
GO: Biological Process	GO:0048634	regulation of muscle organ development			0.003111	1	0.02149	0.1953	10	190	CENPF,NCAM1,MEIS1,FZD7,JARID2,FGF8,SIX1,CCNB1,CDK1,HDAC2
GO: Biological Process	GO:0072359	circulatory system development			0.003147	1	0.02171	0.1973	39	1322	SOX11,NCAM1,EYA1,BCOR,MDK,MEIS1,HOXA1,HOXA5,FZD7,HOXA7,JARID2,SALL1,GPC3,BRCA1,NRXN1,FGF8,FOXC1,COL2A1,FOXM1,NSD2,WT1,CITED1,CHD7,STIL,SIX1,E2F8,CCNB1,HMGA2,TENM4,HEY1,VASH2,ROBO1,CDK1,PRKDC,HAS2,FZD2,TMEM100,PCNA,HDAC2
GO: Biological Process	GO:0097421	liver regeneration			0.003185	1	0.02194	0.1994	4	33	EZH2,TYMS,AURKA,PCNA
GO: Biological Process	GO:0061061	muscle structure development			0.003211	1	0.02209	0.2008	26	779	SOX11,CACNA2D2,CENPF,ETV1,NCAM1,EZH2,CHRNA1,MEIS1,FZD7,JARID2,HOXD10,UCHL1,MYL6B,FGF8,FOXC1,TCF3,WT1,ITGA8,CHD7,SIX1,CCNB1,HEY1,CDK1,FZD2,KDM1A,HDAC2
GO: Biological Process	GO:0050773	regulation of dendrite development			0.003229	1	0.02219	0.2017	10	191	DLG5,DBN1,EZH2,CDK5R1,PPP1R9A,TIAM1,ROBO1,ELAVL4,CDC20,HDAC2
GO: Biological Process	GO:0042330	taxis			0.003266	1	0.02241	0.2037	24	700	ETV1,ETV4,HMGB2,NCAM1,TUBB2B,MDK,CHN1,GFRA1,HOXA1,HOXA2,CDK5R1,HOXB9,NRXN1,FGF8,FOXD1,NRTN,FZD3,DPYSL4,EDN3,EFNA4,TIAM1,SLIT1,UNC5C,ROBO1
GO: Biological Process	GO:0043161	proteasome-mediated ubiquitin-dependent protein catabolic process			0.003288	1	0.02243	0.2039	17	432	PTTG1,PBK,AURKA,FBXO5,UCHL1,BUB1B,KIF14,UBE2S,UBE2C,SKP2,CCNB1,SMARCC1,CDK1,CDC20,MAD2L1,CDK2,AURKB
GO: Biological Process	GO:0007292	female gamete generation			0.003319	1	0.02243	0.2039	9	161	MDK,TRIP13,TTK,AURKA,FBXO5,ASPM,NCAPH,CCNB1,TOP2A
GO: Biological Process	GO:0098728	germline stem cell asymmetric division			0.003346	1	0.02243	0.2039	2	5	ETV5,HOXC4
GO: Biological Process	GO:0007089	traversing start control point of mitotic cell cycle			0.003346	1	0.02243	0.2039	2	5	DBF4,CDC6
GO: Biological Process	GO:0009786	regulation of asymmetric cell division			0.003346	1	0.02243	0.2039	2	5	HOXC4,ASPM
GO: Biological Process	GO:1905462	regulation of DNA duplex unwinding			0.003346	1	0.02243	0.2039	2	5	MCM2,TOP2A
GO: Biological Process	GO:1901995	positive regulation of meiotic cell cycle phase transition			0.003346	1	0.02243	0.2039	2	5	CDC25A,CDC25C
GO: Biological Process	GO:1905448	positive regulation of mitochondrial ATP synthesis coupled electron transport			0.003346	1	0.02243	0.2039	2	5	CCNB1,CDK1
GO: Biological Process	GO:0048298	positive regulation of isotype switching to IgA isotypes			0.003346	1	0.02243	0.2039	2	5	NSD2,MSH2
GO: Biological Process	GO:0031427	response to methotrexate			0.003346	1	0.02243	0.2039	2	5	DHFR,ASNS
GO: Biological Process	GO:0072757	cellular response to camptothecin			0.003346	1	0.02243	0.2039	2	5	BLM,RAD51
GO: Biological Process	GO:0014834	skeletal muscle satellite cell maintenance involved in skeletal muscle regeneration			0.003346	1	0.02243	0.2039	2	5	EZH2,FZD7
GO: Biological Process	GO:0042078	germ-line stem cell division			0.003346	1	0.02243	0.2039	2	5	ETV5,HOXC4
GO: Biological Process	GO:0072513	positive regulation of secondary heart field cardioblast proliferation			0.003346	1	0.02243	0.2039	2	5	EYA1,SIX1
GO: Biological Process	GO:0048133	male germ-line stem cell asymmetric division			0.003346	1	0.02243	0.2039	2	5	ETV5,HOXC4
GO: Biological Process	GO:0051754	meiotic sister chromatid cohesion, centromeric			0.003346	1	0.02243	0.2039	2	5	BUB1,BUB1B
GO: Biological Process	GO:0033600	negative regulation of mammary gland epithelial cell proliferation			0.003346	1	0.02243	0.2039	2	5	ETV4,ROBO1
GO: Biological Process	GO:0051053	negative regulation of DNA metabolic process			0.003383	1	0.02265	0.2058	8	132	DACH1,CHEK1,BLM,AUNIP,PARPBP,MSH2,MSH6,HMGA2
GO: Biological Process	GO:0051100	negative regulation of binding			0.003478	1	0.02325	0.2114	10	193	SOX11,MAP2,AURKA,NEK2,STMN1,HMGA2,HEY1,KDM1A,HDAC2,AURKB
GO: Biological Process	GO:0045638	negative regulation of myeloid cell differentiation			0.00355	1	0.0237	0.2154	7	105	HMGB3,MEIS1,HOXA5,HOXA7,PRMT1,NME1,TCF3
GO: Biological Process	GO:2000781	positive regulation of double-strand break repair			0.003557	1	0.02372	0.2156	4	34	BLM,TIMELESS,FOXM1,PRKDC
GO: Biological Process	GO:1900087	positive regulation of G1/S transition of mitotic cell cycle			0.003569	1	0.02373	0.2157	5	55	CDC45,DBF4,APEX1,CCNE1,CDC6
GO: Biological Process	GO:0045646	regulation of erythrocyte differentiation			0.003569	1	0.02373	0.2157	5	55	HMGB2,HOXA5,PRMT1,TCF3,KDM1A
GO: Biological Process	GO:0060541	respiratory system development			0.00359	1	0.02375	0.2159	12	259	MYCN,SOX11,DLG5,EYA1,HOXA5,GPC3,FGF8,TIMELESS,WT1,CHD7,SIX1,HMGA2
GO: Biological Process	GO:0031060	regulation of histone methylation			0.003591	1	0.02375	0.2159	6	79	BCOR,JARID2,BRCA1,AUTS2,KDM1A,MYB
GO: Biological Process	GO:0030879	mammary gland development			0.003602	1	0.02375	0.2159	9	163	CDO1,KDM5B,ETV4,ETV5,HOXA5,HOXB9,NME1,PPAT,ROBO1
GO: Biological Process	GO:0061548	ganglion development			0.00361	1	0.02375	0.2159	3	17	FZD3,SIX1,UNC5C
GO: Biological Process	GO:0021889	olfactory bulb interneuron differentiation			0.00361	1	0.02375	0.2159	3	17	SALL1,SLIT1,ROBO1
GO: Biological Process	GO:0006266	DNA ligation			0.00361	1	0.02375	0.2159	3	17	HMGB2,RAD51,TOP2A
GO: Biological Process	GO:0051571	positive regulation of histone H3-K4 methylation			0.00361	1	0.02375	0.2159	3	17	BRCA1,AUTS2,MYB
GO: Biological Process	GO:0021681	cerebellar granular layer development			0.00361	1	0.02375	0.2159	3	17	MDK,NRXN1,KIF14
GO: Biological Process	GO:0042981	regulation of apoptotic process			0.003803	1	0.02499	0.2271	49	1779	DLG5,BARD1,HMGB2,EYA1,MDK,MELK,BLM,HOXA5,AURKA,CDK5R1,BRCA1,BUB1,KIF14,FGF8,UNG,MLLT11,ITM2C,NME1,FOXC1,COL2A1,FZD3,WT1,APEX1,BIRC5,CITED1,MSH2,STIL,SIX1,ECT2,SKP2,HMGA2,TIA1,TIAM1,TLE1,ASNS,UNC5C,TMF1,ROBO1,PAX2,CDK1,PRKDC,PRAME,TOP2A,KDM1A,MAD2L1,HDAC2,MYB,AURKB,HELLS
GO: Biological Process	GO:1901976	regulation of cell cycle checkpoint			0.003958	1	0.02597	0.2361	4	35	AURKA,NDC80,CCNB1,MAD2L1
GO: Biological Process	GO:1990138	neuron projection extension			0.004021	1	0.02635	0.2395	10	197	MAP2,DBN1,AURKA,CDK5R1,SYT1,WASF1,TIAM1,SLIT1,AUTS2,KDM1A
GO: Biological Process	GO:0031646	positive regulation of nervous system process			0.004065	1	0.02661	0.2418	6	81	WASF3,DBN1,NMU,NRXN1,TENM4,NETO2
GO: Biological Process	GO:0051591	response to cAMP			0.004148	1	0.02711	0.2465	7	108	CDO1,NME1,WT1,APEX1,CITED1,KDM1A,CDK2
GO: Biological Process	GO:0007131	reciprocal meiotic recombination			0.004167	1	0.0272	0.2472	5	57	BRIP1,TRIP13,RAD54B,RAD51,TOP2A
GO: Biological Process	GO:0010941	regulation of cell death			0.00419	1	0.02731	0.2482	53	1969	MYCN,SOX11,DLG5,BARD1,HMGB2,NCAM1,EYA1,MDK,MELK,BLM,HOXA5,AURKA,CDK5R1,BRCA1,BUB1,KIF14,FGF8,UNG,MLLT11,ITM2C,NME1,FOXC1,DNMT3A,COL2A1,FZD3,WT1,APEX1,BIRC5,CITED1,MSH2,STIL,SIX1,ECT2,SKP2,HMGA2,TIA1,TIAM1,TLE1,ASNS,UNC5C,TMF1,ROBO1,PAX2,CDK1,PRKDC,PRAME,TOP2A,KDM1A,MAD2L1,HDAC2,MYB,AURKB,HELLS
GO: Biological Process	GO:0021987	cerebral cortex development			0.004239	1	0.0276	0.2509	8	137	MDK,CDK5R1,ASPM,KIF14,NPY,H2AX,ROBO1,KDM1A
GO: Biological Process	GO:0048385	regulation of retinoic acid receptor signaling pathway			0.004272	1	0.0277	0.2518	3	18	EZH2,CRABP2,PRAME
GO: Biological Process	GO:0033262	regulation of nuclear cell cycle DNA replication			0.004272	1	0.0277	0.2518	3	18	DACH1,CDC7,DBF4
GO: Biological Process	GO:1904748	regulation of apoptotic process involved in development			0.004272	1	0.0277	0.2518	3	18	FOXC1,WT1,PAX2
GO: Biological Process	GO:0035282	segmentation			0.004364	1	0.02826	0.2569	7	109	MEOX1,HOXA2,FOXC1,WT1,DLL3,PRKDC,TCF7L1
GO: Biological Process	GO:0050679	positive regulation of epithelial cell proliferation			0.004379	1	0.02827	0.257	11	232	SOX11,KDM5B,HMGB2,EYA1,MDK,FZD7,NME1,HMGA2,VASH2,PAX2,HAS2
GO: Biological Process	GO:0030855	epithelial cell differentiation			0.004386	1	0.02827	0.257	28	880	MYCN,SOX11,KDM5B,DLG5,EYA1,EZH2,HOXA5,TYMS,FZD7,HOXA7,SALL1,FGF8,MACROH2A2,NPY,FOXC1,WT1,CITED1,SIX1,E2F8,HEY1,PAX2,CDK1,FZD2,TMEM100,PLK4,SIX2,PCNA,HDAC2
GO: Biological Process	GO:0021846	cell proliferation in forebrain			0.004388	1	0.02827	0.257	4	36	RRM1,KIF14,FGF8,HMGA2
GO: Biological Process	GO:0040020	regulation of meiotic nuclear division			0.004388	1	0.02827	0.257	4	36	TRIP13,TTK,FBXO5,CDC20
GO: Biological Process	GO:0043066	negative regulation of apoptotic process			0.004424	1	0.02847	0.2587	32	1048	BARD1,HMGB2,EYA1,MDK,BLM,AURKA,BRCA1,KIF14,FGF8,UNG,FOXC1,COL2A1,FZD3,WT1,BIRC5,CITED1,MSH2,STIL,SIX1,HMGA2,TLE1,ASNS,TMF1,PAX2,CDK1,PRKDC,PRAME,KDM1A,MAD2L1,HDAC2,AURKB,HELLS
GO: Biological Process	GO:0048538	thymus development			0.004492	1	0.02876	0.2614	5	58	JARID2,SIX1,CCNB2,PRKDC,MYB
GO: Biological Process	GO:0035825	homologous recombination			0.004492	1	0.02876	0.2614	5	58	BRIP1,TRIP13,RAD54B,RAD51,TOP2A
GO: Biological Process	GO:0061005	cell differentiation involved in kidney development			0.004492	1	0.02876	0.2614	5	58	SALL1,WT1,CITED1,PAX2,SIX2
GO: Biological Process	GO:0051438	regulation of ubiquitin-protein transferase activity			0.004492	1	0.02876	0.2614	5	58	FBXO5,UBE2S,UBE2C,CDC20,MAD2L1
GO: Biological Process	GO:0051216	cartilage development			0.004522	1	0.02891	0.2628	11	233	MYCN,MDK,MEX3C,HOXA5,TYMS,HOXA11,HOXC4,HOXD11,COL2A1,HMGA2,SIX2
GO: Biological Process	GO:0003281	ventricular septum development			0.004584	1	0.02927	0.266	6	83	SOX11,SALL1,NSD2,HEY1,ROBO1,FZD2
GO: Biological Process	GO:0071695	anatomical structure maturation			0.004629	1	0.02952	0.2683	10	201	TRIP13,HOXA5,TYMS,AURKA,CDK5R1,FBXO5,NRXN1,CCNB1,PAX2,KDM1A
GO: Biological Process	GO:0097327	response to antineoplastic agent			0.00482	1	0.03056	0.2777	7	111	BLM,BRCA1,DHFR,TIMELESS,RAD51,ASNS,PCNA
GO: Biological Process	GO:0072132	mesenchyme morphogenesis			0.004834	1	0.03056	0.2777	5	59	FGF8,FOXC1,HEY1,ROBO1,TMEM100
GO: Biological Process	GO:0060317	cardiac epithelial to mesenchymal transition			0.004849	1	0.03056	0.2777	4	37	FGF8,HEY1,HAS2,TMEM100
GO: Biological Process	GO:2001021	negative regulation of response to DNA damage stimulus			0.004861	1	0.03056	0.2777	6	84	AUNIP,FBXO5,PARPBP,PCBP4,HMGA2,KDM1A
GO: Biological Process	GO:0021675	nerve development			0.004861	1	0.03056	0.2777	6	84	HOXA1,SALL1,NRTN,CHD7,SIX1,PAX2
GO: Biological Process	GO:0007605	sensory perception of sound			0.004926	1	0.03056	0.2777	9	171	EYA1,HOXA1,PGAP1,COL2A1,CHRNA9,SOBP,BIRC5,CHD7,SIX1
GO: Biological Process	GO:0072298	regulation of metanephric glomerulus development			0.004958	1	0.03056	0.2777	2	6	WT1,PAX2
GO: Biological Process	GO:0034721	histone H3-K4 demethylation, trimethyl-H3-K4-specific			0.004958	1	0.03056	0.2777	2	6	KDM5B,JARID2
GO: Biological Process	GO:0002326	B cell lineage commitment			0.004958	1	0.03056	0.2777	2	6	TCF3,PRKDC
GO: Biological Process	GO:0038031	non-canonical Wnt signaling pathway via JNK cascade			0.004958	1	0.03056	0.2777	2	6	FZD7,FZD10
GO: Biological Process	GO:0048296	regulation of isotype switching to IgA isotypes			0.004958	1	0.03056	0.2777	2	6	NSD2,MSH2
GO: Biological Process	GO:0097168	mesenchymal stem cell proliferation			0.004958	1	0.03056	0.2777	2	6	CITED1,SIX2
GO: Biological Process	GO:0033152	immunoglobulin V(D)J recombination			0.004958	1	0.03056	0.2777	2	6	TCF3,PRKDC
GO: Biological Process	GO:0060022	hard palate development			0.004958	1	0.03056	0.2777	2	6	SOX11,FZD2
GO: Biological Process	GO:0051987	positive regulation of attachment of spindle microtubules to kinetochore			0.004958	1	0.03056	0.2777	2	6	CENPE,CCNB1
GO: Biological Process	GO:0031536	positive regulation of exit from mitosis			0.004958	1	0.03056	0.2777	2	6	UBE2C,BIRC5
GO: Biological Process	GO:0060842	arterial endothelial cell differentiation			0.004958	1	0.03056	0.2777	2	6	HEY1,TMEM100
GO: Biological Process	GO:2001033	negative regulation of double-strand break repair via nonhomologous end joining			0.004958	1	0.03056	0.2777	2	6	AUNIP,HMGA2
GO: Biological Process	GO:0006189	'de novo' IMP biosynthetic process			0.004958	1	0.03056	0.2777	2	6	PFAS,PPAT
GO: Biological Process	GO:2000697	negative regulation of epithelial cell differentiation involved in kidney development			0.004958	1	0.03056	0.2777	2	6	SALL1,CITED1
GO: Biological Process	GO:1901563	response to camptothecin			0.004958	1	0.03056	0.2777	2	6	BLM,RAD51
GO: Biological Process	GO:0061197	fungiform papilla morphogenesis			0.004958	1	0.03056	0.2777	2	6	SIX1,HDAC2
GO: Biological Process	GO:1990414	replication-born double-strand break repair via sister chromatid exchange			0.004958	1	0.03056	0.2777	2	6	BLM,RAD51
GO: Biological Process	GO:2000821	regulation of grooming behavior			0.004958	1	0.03056	0.2777	2	6	NMU,NRXN1
GO: Biological Process	GO:0090166	Golgi disassembly			0.004958	1	0.03056	0.2777	2	6	VRK1,CDK1
GO: Biological Process	GO:0043987	histone H3-S10 phosphorylation			0.004958	1	0.03056	0.2777	2	6	VRK1,CCNB1
GO: Biological Process	GO:0010994	free ubiquitin chain polymerization			0.004958	1	0.03056	0.2777	2	6	UBE2S,UBE2C
GO: Biological Process	GO:0032259	methylation			0.004969	1	0.03059	0.278	16	413	BCOR,EZH2,TYMS,JARID2,BRCA1,PRMT1,DNMT3A,NSD2,MIS18A,WT1,SUV39H2,AUTS2,KDM1A,HDAC2,MYB,HELLS
GO: Biological Process	GO:0033151	V(D)J recombination			0.005004	1	0.03069	0.2789	3	19	HMGB2,TCF3,PRKDC
GO: Biological Process	GO:0072520	seminiferous tubule development			0.005004	1	0.03069	0.2789	3	19	KIF18A,BRIP1,WT1
GO: Biological Process	GO:0006978	DNA damage response, signal transduction by p53 class mediator resulting in transcription of p21 class mediator			0.005004	1	0.03069	0.2789	3	19	BRCA1,PCBP4,FOXM1
GO: Biological Process	GO:0034401	chromatin organization involved in regulation of transcription			0.005038	1	0.03086	0.2805	8	141	CHEK1,EZH2,CDC45,DNMT3A,ATAD2,KDM1A,HDAC2,HELLS
GO: Biological Process	GO:0050807	regulation of synapse organization			0.005135	1	0.03138	0.2852	12	271	DLG5,ETV5,DBN1,CDK5R1,NRXN1,PPP1R9A,SIX1,TIAM1,SLIT1,LRRTM2,LRP4,CDC20
GO: Biological Process	GO:0045665	negative regulation of neuron differentiation			0.005135	1	0.03138	0.2852	12	271	MAP2,MEIS1,HOXA2,CDK5R1,PTPRG,ASPM,ITM2C,INPP5F,HEY1,SLIT1,LRP4,HDAC2
GO: Biological Process	GO:0046879	hormone secretion			0.005184	1	0.03164	0.2876	15	378	SOX11,KDM5B,CACNA2D2,NMU,NELL2,NRXN1,NNAT,FOXD1,BIRC5,CHD7,EDN3,HMGA2,TIAM1,TMF1,MYB
GO: Biological Process	GO:0003206	cardiac chamber morphogenesis			0.005254	1	0.03203	0.2911	8	142	SOX11,FGF8,FOXC1,NSD2,CHD7,HEY1,ROBO1,FZD2
GO: Biological Process	GO:0044030	regulation of DNA methylation			0.005341	1	0.0324	0.2945	4	38	BRCA1,DNMT3A,MIS18A,WT1
GO: Biological Process	GO:0048566	embryonic digestive tract development			0.005341	1	0.0324	0.2945	4	38	SOX11,SALL1,SIX2,MYB
GO: Biological Process	GO:0003203	endocardial cushion morphogenesis			0.005341	1	0.0324	0.2945	4	38	FGF8,HEY1,ROBO1,TMEM100
GO: Biological Process	GO:0043067	regulation of programmed cell death			0.005341	1	0.0324	0.2945	49	1811	DLG5,BARD1,HMGB2,EYA1,MDK,MELK,BLM,HOXA5,AURKA,CDK5R1,BRCA1,BUB1,KIF14,FGF8,UNG,MLLT11,ITM2C,NME1,FOXC1,COL2A1,FZD3,WT1,APEX1,BIRC5,CITED1,MSH2,STIL,SIX1,ECT2,SKP2,HMGA2,TIA1,TIAM1,TLE1,ASNS,UNC5C,TMF1,ROBO1,PAX2,CDK1,PRKDC,PRAME,TOP2A,KDM1A,MAD2L1,HDAC2,MYB,AURKB,HELLS
GO: Biological Process	GO:0018209	peptidyl-serine modification			0.005486	1	0.03324	0.3021	14	344	PBK,TTK,CDC7,AURKA,CDK5R1,NRXN1,VRK1,INPP5F,CCNB1,HMGA2,CDK1,PRKDC,CDK2,AURKB
GO: Biological Process	GO:0007528	neuromuscular junction development			0.005574	1	0.03373	0.3066	5	61	CACNA2D2,ETV5,CHRNA1,SIX1,LRP4
GO: Biological Process	GO:0003231	cardiac ventricle development			0.005708	1	0.0345	0.3136	8	144	SOX11,SALL1,FOXC1,NSD2,CHD7,HEY1,ROBO1,FZD2
GO: Biological Process	GO:0007096	regulation of exit from mitosis			0.005806	1	0.03484	0.3166	3	20	KNTC1,UBE2C,BIRC5
GO: Biological Process	GO:0070987	error-free translesion synthesis			0.005806	1	0.03484	0.3166	3	20	RFC3,RFC4,PCNA
GO: Biological Process	GO:0042772	DNA damage response, signal transduction resulting in transcription			0.005806	1	0.03484	0.3166	3	20	BRCA1,PCBP4,FOXM1
GO: Biological Process	GO:2000696	regulation of epithelial cell differentiation involved in kidney development			0.005806	1	0.03484	0.3166	3	20	SALL1,CITED1,PAX2
GO: Biological Process	GO:1905874	regulation of postsynaptic density organization			0.005806	1	0.03484	0.3166	3	20	DBN1,NRXN1,LRRTM2
GO: Biological Process	GO:0051447	negative regulation of meiotic cell cycle			0.005806	1	0.03484	0.3166	3	20	TRIP13,TTK,FBXO5
GO: Biological Process	GO:0090100	positive regulation of transmembrane receptor protein serine/threonine kinase signaling pathway			0.005839	1	0.03499	0.3181	7	115	SOX11,ZNF423,TTK,GPC3,FOXD1,ITGA8,CITED1
GO: Biological Process	GO:0030513	positive regulation of BMP signaling pathway			0.005865	1	0.0351	0.3191	4	39	SOX11,ZNF423,GPC3,FOXD1
GO: Biological Process	GO:0048565	digestive tract development			0.005946	1	0.03555	0.3231	8	145	SOX11,HOXA5,TYMS,SALL1,NPY,CCNB1,SIX2,MYB
GO: Biological Process	GO:0051568	histone H3-K4 methylation			0.005972	1	0.03566	0.3241	5	62	BCOR,BRCA1,AUTS2,KDM1A,MYB
GO: Biological Process	GO:0043069	negative regulation of programmed cell death			0.006055	1	0.0361	0.3281	32	1071	BARD1,HMGB2,EYA1,MDK,BLM,AURKA,BRCA1,KIF14,FGF8,UNG,FOXC1,COL2A1,FZD3,WT1,BIRC5,CITED1,MSH2,STIL,SIX1,HMGA2,TLE1,ASNS,TMF1,PAX2,CDK1,PRKDC,PRAME,KDM1A,MAD2L1,HDAC2,AURKB,HELLS
GO: Biological Process	GO:0007219	Notch signaling pathway			0.00606	1	0.0361	0.3281	10	209	ZNF423,DLGAP5,DLK1,EYA1,MDK,FOXC1,HEY1,DLL3,ROBO1,TMEM100
GO: Biological Process	GO:0050808	synapse organization			0.00607	1	0.03612	0.3283	18	498	DLG5,CACNA2D2,WASF3,ETV5,DBN1,CHRNA1,ADD2,CDK5R1,CADM1,NRXN1,WASF1,PPP1R9A,SIX1,TIAM1,SLIT1,LRRTM2,LRP4,CDC20
GO: Biological Process	GO:0043462	regulation of ATPase activity			0.006092	1	0.0362	0.3291	6	88	MCM2,DBN1,DNAJC9,MSH2,NCAPH,MSH6
GO: Biological Process	GO:0009914	hormone transport			0.006109	1	0.03626	0.3296	15	385	SOX11,KDM5B,CACNA2D2,NMU,NELL2,NRXN1,NNAT,FOXD1,BIRC5,CHD7,EDN3,HMGA2,TIAM1,TMF1,MYB
GO: Biological Process	GO:0031644	regulation of nervous system process			0.00637	1	0.03776	0.3432	9	178	WASF3,NCAM1,DBN1,NMU,NRXN1,NPTX2,TENM4,NETO2,TMEM100
GO: Biological Process	GO:0002381	immunoglobulin production involved in immunoglobulin mediated immune response			0.00639	1	0.03784	0.3439	5	63	UNG,NSD2,MSH2,MSH6,EXO1
GO: Biological Process	GO:1905332	positive regulation of morphogenesis of an epithelium			0.006422	1	0.03796	0.345	4	40	MDK,SALL1,SIX1,PAX2
GO: Biological Process	GO:0048588	developmental cell growth			0.006431	1	0.03796	0.345	12	279	MAP2,DBN1,MEX3C,AURKA,CDK5R1,SYT1,WASF1,CRABP2,TIAM1,SLIT1,AUTS2,KDM1A
GO: Biological Process	GO:0021766	hippocampus development			0.006433	1	0.03796	0.345	6	89	MDK,EZH2,CDK5R1,KIF14,NME1,HDAC2
GO: Biological Process	GO:0035270	endocrine system development			0.006445	1	0.03798	0.3452	8	147	MDK,HOXA5,SALL1,FGF8,WT1,SIX1,HMGA2,KDM1A
GO: Biological Process	GO:0035148	tube formation			0.0066	1	0.03885	0.3531	9	179	SOX11,HOXA1,SALL1,FGF8,FZD3,STIL,SIX1,PAX2,FZD2
GO: Biological Process	GO:0071625	vocalization behavior			0.006681	1	0.0391	0.3554	3	21	BRINP1,NRXN1,AUTS2
GO: Biological Process	GO:0033189	response to vitamin A			0.006681	1	0.0391	0.3554	3	21	TYMS,DNMT3A,RBP1
GO: Biological Process	GO:0003198	epithelial to mesenchymal transition involved in endocardial cushion formation			0.006681	1	0.0391	0.3554	3	21	FGF8,HEY1,TMEM100
GO: Biological Process	GO:0045682	regulation of epidermis development			0.006787	1	0.0391	0.3554	6	90	MYCN,EZH2,HOXA7,MACROH2A2,FOXC1,HEY1
GO: Biological Process	GO:0042220	response to cocaine			0.006828	1	0.0391	0.3554	5	64	NCAM1,DNMT3A,CCNA2,TIAM1,HDAC2
GO: Biological Process	GO:0034626	fatty acid elongation, polyunsaturated fatty acid			0.006855	1	0.0391	0.3554	2	7	ELOVL2,ELOVL6
GO: Biological Process	GO:0034625	fatty acid elongation, monounsaturated fatty acid			0.006855	1	0.0391	0.3554	2	7	ELOVL2,ELOVL6
GO: Biological Process	GO:0043570	maintenance of DNA repeat elements			0.006855	1	0.0391	0.3554	2	7	MSH2,MSH6
GO: Biological Process	GO:0033313	meiotic cell cycle checkpoint			0.006855	1	0.0391	0.3554	2	7	TRIP13,TTK
GO: Biological Process	GO:0051305	chromosome movement towards spindle pole			0.006855	1	0.0391	0.3554	2	7	CENPE,DLGAP5
GO: Biological Process	GO:1902338	negative regulation of apoptotic process involved in morphogenesis			0.006855	1	0.0391	0.3554	2	7	FOXC1,PAX2
GO: Biological Process	GO:0038030	non-canonical Wnt signaling pathway via MAPK cascade			0.006855	1	0.0391	0.3554	2	7	FZD7,FZD10
GO: Biological Process	GO:0048290	isotype switching to IgA isotypes			0.006855	1	0.0391	0.3554	2	7	NSD2,MSH2
GO: Biological Process	GO:0060763	mammary duct terminal end bud growth			0.006855	1	0.0391	0.3554	2	7	KDM5B,ROBO1
GO: Biological Process	GO:0044806	G-quadruplex DNA unwinding			0.006855	1	0.0391	0.3554	2	7	BLM,DNA2
GO: Biological Process	GO:0032876	negative regulation of DNA endoreduplication			0.006855	1	0.0391	0.3554	2	7	FBXO5,MSH6
GO: Biological Process	GO:0051096	positive regulation of helicase activity			0.006855	1	0.0391	0.3554	2	7	MSH2,MSH6
GO: Biological Process	GO:0010571	positive regulation of nuclear cell cycle DNA replication			0.006855	1	0.0391	0.3554	2	7	CDC7,DBF4
GO: Biological Process	GO:0010216	maintenance of DNA methylation			0.006855	1	0.0391	0.3554	2	7	DNMT3A,HELLS
GO: Biological Process	GO:0032466	negative regulation of cytokinesis			0.006855	1	0.0391	0.3554	2	7	E2F8,AURKB
GO: Biological Process	GO:0061196	fungiform papilla development			0.006855	1	0.0391	0.3554	2	7	SIX1,HDAC2
GO: Biological Process	GO:0019368	fatty acid elongation, unsaturated fatty acid			0.006855	1	0.0391	0.3554	2	7	ELOVL2,ELOVL6
GO: Biological Process	GO:0019367	fatty acid elongation, saturated fatty acid			0.006855	1	0.0391	0.3554	2	7	ELOVL2,ELOVL6
GO: Biological Process	GO:0035405	histone-threonine phosphorylation			0.006855	1	0.0391	0.3554	2	7	CHEK1,VRK1
GO: Biological Process	GO:0090267	positive regulation of mitotic cell cycle spindle assembly checkpoint			0.006855	1	0.0391	0.3554	2	7	NDC80,MAD2L1
GO: Biological Process	GO:0090240	positive regulation of histone H4 acetylation			0.006855	1	0.0391	0.3554	2	7	BRCA1,AUTS2
GO: Biological Process	GO:0090232	positive regulation of spindle checkpoint			0.006855	1	0.0391	0.3554	2	7	NDC80,MAD2L1
GO: Biological Process	GO:0050803	regulation of synapse structure or activity			0.006978	1	0.03976	0.3614	12	282	DLG5,ETV5,DBN1,CDK5R1,NRXN1,PPP1R9A,SIX1,TIAM1,SLIT1,LRRTM2,LRP4,CDC20
GO: Biological Process	GO:0009262	deoxyribonucleotide metabolic process			0.007014	1	0.03992	0.3628	4	41	RRM1,RRM2,TYMS,UNG
GO: Biological Process	GO:0050770	regulation of axonogenesis			0.007116	1	0.04045	0.3677	10	214	MAP2,TUBB2B,DBN1,CHN1,CDK5R1,CRABP2,TIAM1,SLIT1,LRP4,ROBO1
GO: Biological Process	GO:0002520	immune system development			0.007167	1	0.04069	0.3699	33	1127	PATZ1,HMGB2,HMGB3,MDK,MELK,MEIS1,ADD2,MEOX1,BLM,HOXA5,FZD7,HOXA7,JARID2,GPC3,PRMT1,UNG,NME1,FOXC1,TCF3,NSD2,RBP1,CHD7,MSH2,SIX1,MSH6,EFNA4,CCNB2,EXO1,PRKDC,TOP2A,KDM1A,MYB,HELLS
GO: Biological Process	GO:0016055	Wnt signaling pathway			0.007233	1	0.04102	0.3729	19	546	MDK,FZD7,SALL1,GPC3,ASPM,FGF8,FZD3,CITED1,CCNE1,HMGA2,TIAM1,TLE1,TLE4,CXXC4,LRP4,FZD10,FZD2,TCF7L1,HDAC2
GO: Biological Process	GO:0198738	cell-cell signaling by wnt			0.007506	1	0.04252	0.3865	19	548	MDK,FZD7,SALL1,GPC3,ASPM,FGF8,FZD3,CITED1,CCNE1,HMGA2,TIAM1,TLE1,TLE4,CXXC4,LRP4,FZD10,FZD2,TCF7L1,HDAC2
GO: Biological Process	GO:0060998	regulation of dendritic spine development			0.007537	1	0.04265	0.3876	6	92	DLG5,DBN1,CDK5R1,PPP1R9A,TIAM1,HDAC2
GO: Biological Process	GO:0008356	asymmetric cell division			0.00763	1	0.04275	0.3885	3	22	ETV5,HOXC4,ASPM
GO: Biological Process	GO:0046653	tetrahydrofolate metabolic process			0.00763	1	0.04275	0.3885	3	22	TYMS,DHFR,MTHFD2L
GO: Biological Process	GO:0048532	anatomical structure arrangement			0.00763	1	0.04275	0.3885	3	22	HOXA1,KIF14,PAX2
GO: Biological Process	GO:0044849	estrous cycle			0.00763	1	0.04275	0.3885	3	22	MDK,HAS2,PCNA
GO: Biological Process	GO:0006206	pyrimidine nucleobase metabolic process			0.00763	1	0.04275	0.3885	3	22	RRM1,TYMS,DPYSL4
GO: Biological Process	GO:0070828	heterochromatin organization			0.00763	1	0.04275	0.3885	3	22	HMGA2,WDHD1,HELLS
GO: Biological Process	GO:0090190	positive regulation of branching involved in ureteric bud morphogenesis			0.00763	1	0.04275	0.3885	3	22	SALL1,SIX1,PAX2
GO: Biological Process	GO:0048712	negative regulation of astrocyte differentiation			0.00763	1	0.04275	0.3885	3	22	MYCN,HMGA2,DLL3
GO: Biological Process	GO:0045911	positive regulation of DNA recombination			0.00764	1	0.04275	0.3885	4	42	BLM,TIMELESS,NSD2,MSH2
GO: Biological Process	GO:0060603	mammary gland duct morphogenesis			0.00764	1	0.04275	0.3885	4	42	KDM5B,ETV4,ETV5,ROBO1
GO: Biological Process	GO:0030010	establishment of cell polarity			0.007829	1	0.04376	0.3977	8	152	CENPA,MAP2,EYA1,SPDL1,NDC80,SPAG5,HEY1,MAD2L1
GO: Biological Process	GO:0060079	excitatory postsynaptic potential			0.007999	1	0.04465	0.4059	7	122	DBN1,CHRNA1,CHRNA5,NRXN1,CHRNA9,PPP1R9A,NETO2
GO: Biological Process	GO:0033002	muscle cell proliferation			0.008184	1	0.04564	0.4148	12	288	NCAM1,MEIS1,JARID2,FOXC1,SIX1,SKP2,CCNB1,TENM4,CDK1,PRKDC,HDAC2,MYB
GO: Biological Process	GO:0104004	cellular response to environmental stimulus			0.008241	1	0.04585	0.4167	14	361	PBK,CHEK1,BLM,H2AW,RAD51,ECT2,RAD51AP1,HMGA2,H2AX,PAX2,CDC25A,KDM1A,PCNA,AURKB
GO: Biological Process	GO:0071214	cellular response to abiotic stimulus			0.008241	1	0.04585	0.4167	14	361	PBK,CHEK1,BLM,H2AW,RAD51,ECT2,RAD51AP1,HMGA2,H2AX,PAX2,CDC25A,KDM1A,PCNA,AURKB
GO: Biological Process	GO:0060425	lung morphogenesis			0.008267	1	0.04594	0.4176	5	67	SOX11,DLG5,HOXA5,FGF8,HMGA2
GO: Biological Process	GO:0050795	regulation of behavior			0.008345	1	0.04632	0.4211	6	94	DBN1,MDK,NMU,HOXA1,NRXN1,HDAC2
GO: Biological Process	GO:0019220	regulation of phosphate metabolic process			0.008383	1	0.04648	0.4225	52	1994	CDKN3,CENPE,PBK,BARD1,MCM7,EZH2,TTK,ADCY2,GFRA1,BLM,FZD7,CKS1B,CKS2,CDK5R1,NRXN1,DBF4,UCHL1,KIF14,PRMT1,FGF8,NUP160,PSRC1,RAD51,FOXM1,TCF3,CHRNA9,RAE1,PPP1R9A,CCNJ,STIL,INPP5F,ECT2,EDN3,CCNA2,CCNB1,CCNE1,HMGA2,LMNB1,TIAM1,CCNB2,CCNE2,TPX2,LRP4,FZD10,ROBO1,CDK1,PRKDC,CDC6,CDC25A,CDC25C,FZD2,HDAC2
GO: Biological Process	GO:0051174	regulation of phosphorus metabolic process			0.008462	1	0.04687	0.426	52	1995	CDKN3,CENPE,PBK,BARD1,MCM7,EZH2,TTK,ADCY2,GFRA1,BLM,FZD7,CKS1B,CKS2,CDK5R1,NRXN1,DBF4,UCHL1,KIF14,PRMT1,FGF8,NUP160,PSRC1,RAD51,FOXM1,TCF3,CHRNA9,RAE1,PPP1R9A,CCNJ,STIL,INPP5F,ECT2,EDN3,CCNA2,CCNB1,CCNE1,HMGA2,LMNB1,TIAM1,CCNB2,CCNE2,TPX2,LRP4,FZD10,ROBO1,CDK1,PRKDC,CDC6,CDC25A,CDC25C,FZD2,HDAC2
GO: Biological Process	GO:2000773	negative regulation of cellular senescence			0.008655	1	0.04789	0.4353	3	23	FBXO5,HMGA2,PRKDC
GO: Biological Process	GO:0022612	gland morphogenesis			0.008761	1	0.04837	0.4396	8	155	KDM5B,ETV4,ETV5,MDK,MKI67,PLAG1,FGF8,ROBO1
GO: Biological Process	GO:0030279	negative regulation of ossification			0.008771	1	0.04837	0.4396	6	95	DLK1,BCOR,MDK,HOXA2,CITED1,LRP4
GO: Biological Process	GO:0055021	regulation of cardiac muscle tissue growth			0.008771	1	0.04837	0.4396	6	95	NCAM1,MEIS1,JARID2,CCNB1,CDK1,HDAC2
GO: Biological Process	GO:0031346	positive regulation of cell projection organization			0.008955	1	0.04892	0.4446	17	479	DLG5,ATP8A2,TUBB2B,DBN1,MDK,EZH2,SYT1,NME1,RANBP1,PPP1R9A,ENC1,CRABP2,TIAM1,AUTS2,ROBO1,ELAVL4,KDM1A
GO: Biological Process	GO:0010824	regulation of centrosome duplication			0.009001	1	0.04892	0.4446	4	44	CEP76,BRCA1,STIL,PLK4
GO: Biological Process	GO:0097106	postsynaptic density organization			0.009001	1	0.04892	0.4446	4	44	DBN1,CADM1,NRXN1,LRRTM2
GO: Biological Process	GO:0090224	regulation of spindle organization			0.009001	1	0.04892	0.4446	4	44	PSRC1,RAE1,SPAG5,TPX2
GO: Biological Process	GO:0072161	mesenchymal cell differentiation involved in kidney development			0.009028	1	0.04892	0.4446	2	8	PAX2,SIX2
GO: Biological Process	GO:0032075	positive regulation of nuclease activity			0.009028	1	0.04892	0.4446	2	8	HMGB2,PCNA
GO: Biological Process	GO:0002072	optic cup morphogenesis involved in camera-type eye development			0.009028	1	0.04892	0.4446	2	8	SOX11,PAX2
GO: Biological Process	GO:1905446	regulation of mitochondrial ATP synthesis coupled electron transport			0.009028	1	0.04892	0.4446	2	8	CCNB1,CDK1
GO: Biological Process	GO:0002069	columnar/cuboidal epithelial cell maturation			0.009028	1	0.04892	0.4446	2	8	HOXA5,TYMS
GO: Biological Process	GO:0072049	comma-shaped body morphogenesis			0.009028	1	0.04892	0.4446	2	8	WT1,HEY1
GO: Biological Process	GO:0036302	atrioventricular canal development			0.009028	1	0.04892	0.4446	2	8	CHD7,HAS2
GO: Biological Process	GO:2001012	mesenchymal cell differentiation involved in renal system development			0.009028	1	0.04892	0.4446	2	8	PAX2,SIX2
GO: Biological Process	GO:2000618	regulation of histone H4-K16 acetylation			0.009028	1	0.04892	0.4446	2	8	BRCA1,AUTS2
GO: Biological Process	GO:0090500	endocardial cushion to mesenchymal transition			0.009028	1	0.04892	0.4446	2	8	HEY1,HAS2
GO: Biological Process	GO:0006348	chromatin silencing at telomere			0.009028	1	0.04892	0.4446	2	8	EZH2,CDC45
GO: Biological Process	GO:0097065	anterior head development			0.009028	1	0.04892	0.4446	2	8	PFAS,COL2A1
GO: Biological Process	GO:2000278	regulation of DNA biosynthetic process			0.009085	1	0.04912	0.4465	7	125	DACH1,CHEK1,NEK2,DSCC1,RFC3,RFC4,AURKB
GO: Biological Process	GO:0007569	cell aging			0.009085	1	0.04912	0.4465	7	125	CHEK1,FBXO5,FOXM1,HMGA2,H2AX,CDK1,PRKDC
GO: Biological Process	GO:0071363	cellular response to growth factor stimulus			0.009208	1	0.0497	0.4518	24	763	SOX11,KDM5B,PEG10,ZNF423,MCM7,DBN1,NREP,GFRA1,GPC3,NRXN1,FGF8,WASF1,FOXC1,FOXD1,COL2A1,ITGA8,CITED1,CCNA2,TIA1,ROBO1,PAX2,HAS2,TMEM100,HDAC2
GO: Biological Process	GO:0061053	somite development			0.009213	1	0.0497	0.4518	6	96	SOX11,MEOX1,FOXC1,SIX1,DLL3,PRKDC
GO: Cellular Component	GO:0098687	chromosomal region			1.388e-38	8.524e-36	8.524e-36	5.965e-35	59	362	KNTC1,KIF18A,CENPN,CENPA,CENPE,CENPF,HJURP,SPC25,MCM2,OIP5,MCM3,MCM4,MCM6,MCM7,CHEK1,EZH2,TTK,SEPTIN6,SPDL1,CDC45,BLM,AURKA,NEK2,NCAPG,SALL1,NDC80,BUB1,BUB1B,FEN1,NCAPD2,MKI67,MACROH2A2,DSCC1,DNA2,NUP160,DNMT3A,KIF2C,RAD51,MIS18A,CENPU,APEX1,BIRC5,MSH2,CDCA8,SUV39H2,SPAG5,ZWINT,CCNB1,CENPQ,WDHD1,H2AX,CDK1,PRKDC,KDM1A,MAD2L1,PCNA,CDK2,AURKB,HELLS
GO: Cellular Component	GO:0000775	chromosome, centromeric region			2.826e-26	1.735e-23	8.675e-24	6.071e-23	37	202	KNTC1,KIF18A,CENPN,CENPA,CENPE,CENPF,HJURP,SPC25,OIP5,TTK,SEPTIN6,SPDL1,AURKA,NEK2,NCAPG,NDC80,BUB1,BUB1B,NCAPD2,MKI67,DSCC1,NUP160,DNMT3A,KIF2C,MIS18A,CENPU,BIRC5,CDCA8,SUV39H2,SPAG5,ZWINT,CCNB1,CENPQ,WDHD1,MAD2L1,AURKB,HELLS
GO: Cellular Component	GO:0005819	spindle			8.479e-22	5.206e-19	1.527e-19	1.069e-18	42	359	NUSAP1,KNTC1,KIF18A,CENPE,CENPF,DLGAP5,KIF4A,TTK,SEPTIN6,SPDL1,CDC7,AURKA,NEK2,AUNIP,FBXO5,KIF15,BUB1B,ASPM,KIF14,SAC3D1,PSRC1,KIF11,KIFC1,VRK1,KIF23,RAE1,BIRC5,PRC1,ECT2,CDCA8,SPAG5,CCNB1,KIF20A,TPX2,RACGAP1,CDK1,CKAP2,CDC6,CDC20,KIF18B,MAD2L1,AURKB
GO: Cellular Component	GO:0000793	condensed chromosome			9.95e-22	6.109e-19	1.527e-19	1.069e-18	35	236	KNTC1,CENPN,CENPA,CENPE,CENPF,HJURP,SPC25,HMGB2,CHEK1,SEPTIN6,SPDL1,BLM,AURKA,NEK2,NCAPG,BRCA1,NDC80,BUB1,BUB1B,NCAPD2,MKI67,KIF2C,RAD51,CENPU,SMC4,BIRC5,NCAPH,SPAG5,ZWINT,CCNB1,H2AX,TOP2A,MAD2L1,CDK2,AURKB
GO: Cellular Component	GO:0015630	microtubule cytoskeleton			1.34e-19	8.228e-17	1.646e-17	1.152e-16	78	1368	NUSAP1,KNTC1,KIF18A,DLG5,MAP2,CENPE,CENPF,PCLAF,LRRC49,DLGAP5,KIF4A,MCM2,MCM3,TUBB2B,CEP76,CHEK1,HMMR,TTK,SEPTIN6,SPDL1,CDC7,CDC45,AURKA,NEK2,AUNIP,FBXO5,BRCA1,KIF15,NDC80,BUB1B,ASPM,KIF14,SAC3D1,MLLT11,NME1,PSRC1,KIF11,KIFC1,KIF2C,RAD51,RANBP1,VRK1,KIF23,RAE1,IFT81,DTL,CENPU,APEX1,BIRC5,STMN1,STIL,PRC1,ECT2,CDCA8,SPAG5,CCNB1,CEP55,KIF20A,CCNE1,DNAAF2,TIAM1,CCNB2,CCNE2,TPX2,H2AX,RACGAP1,PAX2,CDK1…
GO: Cellular Component	GO:0000779	condensed chromosome, centromeric region			2.279e-18	1.4e-15	2.333e-16	1.632e-15	24	120	KNTC1,CENPN,CENPA,CENPE,CENPF,HJURP,SPC25,SEPTIN6,SPDL1,AURKA,NEK2,NCAPG,NDC80,BUB1,BUB1B,NCAPD2,KIF2C,CENPU,BIRC5,SPAG5,ZWINT,CCNB1,MAD2L1,AURKB
GO: Cellular Component	GO:0000776	kinetochore			5.443e-18	3.342e-15	4.774e-16	3.341e-15	25	138	KNTC1,KIF18A,CENPN,CENPA,CENPE,CENPF,HJURP,SPC25,TTK,SEPTIN6,SPDL1,NEK2,NDC80,BUB1,BUB1B,NUP160,KIF2C,CENPU,BIRC5,SPAG5,ZWINT,CCNB1,CENPQ,MAD2L1,AURKB
GO: Cellular Component	GO:0005815	microtubule organizing center			8.466e-16	5.198e-13	6.498e-14	4.547e-13	51	756	KIF18A,DLG5,CENPF,PCLAF,DLGAP5,MCM3,CEP76,CHEK1,HMMR,SPDL1,CDC45,AURKA,NEK2,AUNIP,BRCA1,KIF15,NDC80,BUB1B,ASPM,SAC3D1,MLLT11,NME1,KIFC1,KIF2C,RAD51,RANBP1,KIF23,IFT81,DTL,CENPU,APEX1,BIRC5,STIL,SPAG5,CCNB1,CEP55,CCNE1,DNAAF2,CCNB2,CCNE2,TPX2,H2AX,PAX2,CDK1,CKAP2,CDC20,PLK4,TOP2A,PCNA,CDK2,AURKB
GO: Cellular Component	GO:0000790	nuclear chromatin			4.104e-15	2.52e-12	2.8e-13	1.96e-12	86	1924	MYCN,SOX11,KDM5B,PTTG1,TGIF2,CENPA,PATZ1,ZNF423,BACH2,PEG3,DACH1,ETV1,ETV4,NASP,ETV5,HMGB2,HMGB3,HIC2,ZKSCAN7,ACTL6A,ZNF232,EZH2,MEIS1,STAT4,HOXA1,MEOX1,HOXA2,HOXA5,HOXA6,HOXA7,HOXA10,HOXA11,JARID2,H2AW,HOXB9,SINHCAF,HOXC4,HOXC6,SALL2,SALL1,HOXD1,HOXD4,HOXD10,HOXD11,ANP32E,PLAG1,MACROH2A2,TIMELESS,TAF5,HSF2,ZNF107,FOXC1,FOXD1,DNMT3A,RAD51,FOXM1,ZNF492,TCF3,RBBP4,NSD2,ENC1,WT1,E2F5,SIX1,SUV39H2,E2…
GO: Cellular Component	GO:0000777	condensed chromosome kinetochore			6.426e-15	3.946e-12	3.946e-13	2.761e-12	20	107	KNTC1,CENPN,CENPA,CENPE,CENPF,HJURP,SPC25,SEPTIN6,SPDL1,NEK2,NDC80,BUB1,BUB1B,KIF2C,CENPU,BIRC5,SPAG5,ZWINT,CCNB1,MAD2L1
GO: Cellular Component	GO:0005814	centriole			1.845e-13	1.133e-10	1.03e-11	7.208e-11	41	583	CENPF,PCLAF,DLGAP5,MCM3,CEP76,CHEK1,HMMR,CDC45,AURKA,NEK2,AUNIP,BRCA1,KIF15,NDC80,ASPM,SAC3D1,NME1,KIF2C,RANBP1,KIF23,IFT81,DTL,APEX1,BIRC5,STIL,SPAG5,CCNB1,CEP55,CCNE1,CCNB2,CCNE2,H2AX,PAX2,CDK1,CKAP2,CDC20,PLK4,TOP2A,PCNA,CDK2,AURKB
GO: Cellular Component	GO:0005813	centrosome			2.022e-13	1.241e-10	1.035e-11	7.24e-11	39	532	CENPF,PCLAF,DLGAP5,MCM3,CEP76,CHEK1,HMMR,CDC45,AURKA,NEK2,AUNIP,BRCA1,KIF15,NDC80,ASPM,SAC3D1,NME1,KIF2C,RANBP1,KIF23,IFT81,DTL,APEX1,STIL,SPAG5,CCNB1,CEP55,CCNE1,CCNB2,CCNE2,H2AX,PAX2,CDK1,CKAP2,CDC20,PLK4,PCNA,CDK2,AURKB
GO: Cellular Component	GO:0005876	spindle microtubule			2.936e-13	1.803e-10	1.387e-11	9.705e-11	15	62	NUSAP1,KNTC1,KIF18A,CENPE,KIF4A,AURKA,PSRC1,KIF11,BIRC5,PRC1,SPAG5,TPX2,CDK1,KIF18B,AURKB
GO: Cellular Component	GO:0097373	MCM core complex			6.512e-13	3.998e-10	2.666e-11	1.865e-10	14	54	MCM2,MCM3,MCM4,MCM6,MCM7,MCM10,GINS1,CDC45,TIMELESS,WDHD1,PRIM1,PRIM2,GINS2,PCNA
GO: Cellular Component	GO:0042555	MCM complex			6.512e-13	3.998e-10	2.666e-11	1.865e-10	14	54	MCM2,MCM3,MCM4,MCM6,MCM7,MCM10,GINS1,CDC45,TIMELESS,WDHD1,PRIM1,PRIM2,GINS2,PCNA
GO: Cellular Component	GO:0072686	mitotic spindle			1.894e-12	1.163e-09	7.267e-11	5.086e-10	18	111	NUSAP1,KIF18A,CENPE,CDC7,AURKA,ASPM,KIF11,KIFC1,KIF23,RAE1,ECT2,SPAG5,TPX2,RACGAP1,CDK1,KIF18B,MAD2L1,AURKB
GO: Cellular Component	GO:0000781	chromosome, telomeric region			2.714e-12	1.667e-09	9.804e-11	6.861e-10	21	163	MCM2,MCM3,MCM4,MCM6,MCM7,CHEK1,EZH2,CDC45,BLM,FEN1,MACROH2A2,DNA2,RAD51,APEX1,MSH2,H2AX,CDK1,PRKDC,KDM1A,PCNA,CDK2
GO: Cellular Component	GO:0005657	replication fork			3.821e-12	2.346e-09	1.303e-10	9.12e-10	15	73	MCM3,CHEK1,MCM10,CDC45,BLM,TIMELESS,RFC3,RFC4,WDHD1,PRIM1,PRIM2,H2AX,GINS2,PCNA,HDAC2
GO: Cellular Component	GO:0000922	spindle pole			3.934e-11	2.415e-08	1.271e-09	8.896e-09	20	168	KNTC1,CENPF,DLGAP5,SPDL1,AURKA,NEK2,AUNIP,ASPM,PSRC1,KIF11,RAE1,PRC1,SPAG5,CCNB1,TPX2,CKAP2,CDC6,CDC20,MAD2L1,AURKB
GO: Cellular Component	GO:0030496	midbody			1.023e-10	6.279e-08	3.139e-09	2.197e-08	20	177	CENPE,CENPF,KIF4A,SEPTIN6,AURKA,NEK2,ASPM,KIF14,PSRC1,KIF23,BIRC5,PRC1,ECT2,CDCA8,SPAG5,CEP55,KIF20A,RACGAP1,CDK1,AURKB
GO: Cellular Component	GO:0000794	condensed nuclear chromosome			1.54e-10	9.458e-08	4.504e-09	3.152e-08	16	109	CENPA,CENPE,CHEK1,BLM,AURKA,NEK2,BRCA1,NDC80,BUB1,BUB1B,NCAPD2,RAD51,NCAPH,CCNB1,H2AX,AURKB
GO: Cellular Component	GO:0000808	origin recognition complex			1.675e-10	1.028e-07	4.674e-09	3.271e-08	12	53	ORC6,MCM2,MCM3,MCM10,GINS1,CDC45,TIMELESS,WDHD1,PRIM1,PRIM2,GINS2,PCNA
GO: Cellular Component	GO:0000307	cyclin-dependent protein kinase holoenzyme complex			2.355e-10	1.446e-07	6.286e-09	4.399e-08	11	43	CKS1B,CKS2,CCNJ,CCNA2,CCNB1,CCNE1,CCNB2,CCNE2,CDK1,PCNA,CDK2
GO: Cellular Component	GO:0032993	protein-DNA complex			9.615e-10	5.904e-07	2.46e-08	1.721e-07	21	222	CENPA,MCM3,EYA1,MCM10,GINS1,CDC45,HOXA11,H2AW,MACROH2A2,TIMELESS,TCF3,HMGA2,WDHD1,PRIM1,PRIM2,H2AX,H2AZ1,GINS2,PAX2,PRKDC,PCNA
GO: Cellular Component	GO:0000811	GINS complex			4.33e-09	2.659e-06	1.064e-07	7.443e-07	10	43	MCM3,MCM10,GINS1,CDC45,TIMELESS,WDHD1,PRIM1,PRIM2,GINS2,PCNA
GO: Cellular Component	GO:0005871	kinesin complex			4.922e-09	3.022e-06	1.162e-07	8.135e-07	11	56	KIF18A,CENPE,KIF4A,KIF15,KIF14,KIF11,KIFC1,KIF2C,KIF23,KIF20A,KIF18B
GO: Cellular Component	GO:0031261	DNA replication preinitiation complex			5.513e-09	3.385e-06	1.254e-07	8.774e-07	10	44	MCM3,MCM10,GINS1,CDC45,TIMELESS,WDHD1,PRIM1,PRIM2,GINS2,PCNA
GO: Cellular Component	GO:0000940	condensed chromosome outer kinetochore			6.611e-09	4.059e-06	1.381e-07	9.666e-07	7	16	CENPE,CENPF,SPDL1,NDC80,BUB1,BUB1B,CCNB1
GO: Cellular Component	GO:1990234	transferase complex			6.885e-09	4.227e-06	1.381e-07	9.666e-07	41	821	CDK8,KDM5B,BARD1,MCM3,ACTL6A,BCOR,EZH2,JARID2,CKS1B,CKS2,CDK5R1,BRCA1,BUB1B,UBE2S,PRMT1,TAF5,DNA2,RBBP4,POLE2,TUSC3,UBE2C,DTL,ENC1,CCNJ,SKP2,CCNA2,CCNB1,CCNE1,YEATS4,CCNB2,CCNE2,PRIM1,PRIM2,CDK1,CDC20,SNRPD1,SNRPE,SNRPF,PCNA,CDK2,HDAC2
GO: Cellular Component	GO:0036387	pre-replicative complex			6.974e-09	4.282e-06	1.381e-07	9.666e-07	10	45	MCM3,MCM10,GINS1,CDC45,TIMELESS,WDHD1,PRIM1,PRIM2,GINS2,PCNA
GO: Cellular Component	GO:0005656	nuclear pre-replicative complex			6.974e-09	4.282e-06	1.381e-07	9.666e-07	10	45	MCM3,MCM10,GINS1,CDC45,TIMELESS,WDHD1,PRIM1,PRIM2,GINS2,PCNA
GO: Cellular Component	GO:0000784	nuclear chromosome, telomeric region			1.119e-08	6.869e-06	2.147e-07	1.502e-06	15	126	MCM2,MCM3,MCM4,MCM6,MCM7,FEN1,MACROH2A2,DNA2,RAD51,APEX1,MSH2,CDK1,PRKDC,KDM1A,PCNA
GO: Cellular Component	GO:0051233	spindle midzone			1.312e-08	8.058e-06	2.442e-07	1.709e-06	9	36	KIF18A,CENPE,AURKA,KIF14,CDCA8,RACGAP1,CDC6,KIF18B,AURKB
GO: Cellular Component	GO:0000780	condensed nuclear chromosome, centromeric region			3.68e-08	2.26e-05	6.646e-07	4.651e-06	8	29	CENPA,CENPE,AURKA,NDC80,BUB1,BUB1B,CCNB1,AURKB
GO: Cellular Component	GO:0071162	CMG complex			5.639e-08	3.463e-05	9.618e-07	6.731e-06	9	42	MCM3,MCM10,CDC45,TIMELESS,WDHD1,PRIM1,PRIM2,GINS2,PCNA
GO: Cellular Component	GO:0043596	nuclear replication fork			5.639e-08	3.463e-05	9.618e-07	6.731e-06	9	42	MCM3,MCM10,CDC45,TIMELESS,WDHD1,PRIM1,PRIM2,GINS2,PCNA
GO: Cellular Component	GO:0005874	microtubule			9.224e-08	5.664e-05	1.531e-06	1.071e-05	33	636	NUSAP1,KNTC1,KIF18A,MAP2,CENPE,CENPF,LRRC49,KIF4A,TUBB2B,SEPTIN6,AURKA,NEK2,KIF15,ASPM,KIF14,PSRC1,KIF11,KIFC1,KIF2C,KIF23,IFT81,BIRC5,STMN1,PRC1,SPAG5,KIF20A,TIAM1,TPX2,RACGAP1,CDK1,CKAP2,KIF18B,AURKB
GO: Cellular Component	GO:1902554	serine/threonine protein kinase complex			1.058e-07	6.497e-05	1.71e-06	1.196e-05	12	91	CKS1B,CKS2,CDK5R1,CCNJ,CCNA2,CCNB1,CCNE1,CCNB2,CCNE2,CDK1,PCNA,CDK2
GO: Cellular Component	GO:0031298	replication fork protection complex			1.089e-07	6.684e-05	1.714e-06	1.199e-05	5	8	MCM10,CDC45,TIMELESS,WDHD1,GINS2
GO: Cellular Component	GO:0000792	heterochromatin			1.788e-07	0.0001098	2.745e-06	1.921e-05	13	114	CENPA,SALL1,MACROH2A2,FOXC1,DNMT3A,SUV39H2,HMGA2,H2AX,H2AZ1,SMARCC1,PLK4,HDAC2,HELLS
GO: Cellular Component	GO:0000778	condensed nuclear chromosome kinetochore			2.527e-07	0.0001551	3.784e-06	2.648e-05	6	16	CENPA,CENPE,NDC80,BUB1,BUB1B,CCNB1
GO: Cellular Component	GO:0032133	chromosome passenger complex			5.517e-07	0.0003387	8.065e-06	5.644e-05	4	5	AURKA,BIRC5,CDCA8,AURKB
GO: Cellular Component	GO:1902911	protein kinase complex			1.154e-06	0.0007085	1.648e-05	0.0001153	12	113	CKS1B,CKS2,CDK5R1,CCNJ,CCNA2,CCNB1,CCNE1,CCNB2,CCNE2,CDK1,PCNA,CDK2
GO: Cellular Component	GO:0005875	microtubule associated complex			1.289e-06	0.0007912	1.798e-05	0.0001258	19	282	KIF18A,MAP2,CENPE,KIF4A,SEPTIN6,AURKA,KIF15,KIF14,KIF11,KIFC1,KIF2C,KIF23,IFT81,BIRC5,CDCA8,KIF20A,TIAM1,KIF18B,AURKB
GO: Cellular Component	GO:0045120	pronucleus			2.144e-06	0.001317	2.926e-05	0.0002048	6	22	CENPF,EZH2,BLM,AURKA,NCAPD2,CCNA2
GO: Cellular Component	GO:0005720	nuclear heterochromatin			4.632e-06	0.002844	6.182e-05	0.0004326	9	69	CENPA,MACROH2A2,FOXC1,DNMT3A,SUV39H2,H2AX,H2AZ1,SMARCC1,PLK4
GO: Cellular Component	GO:0061695	transferase complex, transferring phosphorus-containing groups			4.978e-06	0.003056	6.503e-05	0.0004551	18	281	MCM3,CKS1B,CKS2,CDK5R1,TAF5,DNA2,POLE2,CCNJ,CCNA2,CCNB1,CCNE1,CCNB2,CCNE2,PRIM1,PRIM2,CDK1,PCNA,CDK2
GO: Cellular Component	GO:0000803	sex chromosome			5.148e-06	0.003161	6.585e-05	0.0004608	7	38	MACROH2A2,DNMT3A,H2AX,H2AZ1,SMARCC1,PLK4,CDK2
GO: Cellular Component	GO:0098578	condensed chromatin of inactivated sex chromosome			6.218e-06	0.003818	7.5e-05	0.0005249	6	26	MACROH2A2,DNMT3A,H2AX,H2AZ1,SMARCC1,PLK4
GO: Cellular Component	GO:0097134	cyclin E1-CDK2 complex			6.261e-06	0.003844	7.5e-05	0.0005249	3	3	CCNE1,CCNE2,CDK2
GO: Cellular Component	GO:0097149	centralspindlin complex			6.261e-06	0.003844	7.5e-05	0.0005249	3	3	KIF23,ECT2,RACGAP1
GO: Cellular Component	GO:1904949	ATPase complex			6.352e-06	0.0039	7.5e-05	0.0005249	11	111	MCM3,ACTL6A,SALL1,ANP32E,RBBP4,RFC4,PRIM1,PRIM2,SMARCC1,PCNA,HDAC2
GO: Cellular Component	GO:0000796	condensin complex			7.392e-06	0.004538	8.563e-05	0.0005992	4	8	NCAPG,NCAPD2,SMC4,NCAPH
GO: Cellular Component	GO:0098577	inactive sex chromosome			7.872e-06	0.004833	8.95e-05	0.0006264	6	27	MACROH2A2,DNMT3A,H2AX,H2AZ1,SMARCC1,PLK4
GO: Cellular Component	GO:0000152	nuclear ubiquitin ligase complex			1.215e-05	0.007458	0.0001356	0.0009489	7	43	BARD1,BCOR,BRCA1,BUB1B,UBE2S,UBE2C,CDC20
GO: Cellular Component	GO:0005667	transcription regulator complex			1.269e-05	0.007794	0.0001392	0.0009739	23	454	CDK8,SOX11,BEX1,DACH1,MEIS1,HOXA10,HOXA11,HOXB9,TAF5,TCF3,APEX1,E2F5,SIX1,E2F8,TLE1,TLE4,PAX2,PRKDC,TCF7L1,SIX2,KDM1A,CDK2,HDAC2
GO: Cellular Component	GO:0034399	nuclear periphery			1.454e-05	0.008928	0.0001566	0.001096	12	144	MAP2,CENPF,KIF4A,SRPK1,BLM,DNMT3A,ENC1,LMNB2,YEATS4,LMNB1,PCNA,MYB
GO: Cellular Component	GO:0005635	nuclear envelope			2.199e-05	0.0135	0.0002321	0.001624	24	503	BRIP1,CLGN,CENPF,RRM1,RRM2,HOXA7,NRXN1,TMEM97,NUP160,RANBP1,PLAAT1,RAE1,DTL,FANCL,E2F5,LMNB2,RGS7,IPO9,YEATS4,CSE1L,LMNB1,TMPO,ELAVL4,MAD2L1
GO: Cellular Component	GO:0001739	sex chromatin			2.23e-05	0.01369	0.0002321	0.001624	6	32	MACROH2A2,DNMT3A,H2AX,H2AZ1,SMARCC1,PLK4
GO: Cellular Component	GO:0000942	condensed nuclear chromosome outer kinetochore			2.424e-05	0.01489	0.0002481	0.001736	3	4	NDC80,BUB1,CCNB1
GO: Cellular Component	GO:1902494	catalytic complex			2.794e-05	0.01715	0.0002812	0.001968	51	1536	CDK8,KDM5B,BARD1,MCM3,ACTL6A,BCOR,RRM1,RRM2,EZH2,SEPTIN6,JARID2,CKS1B,CKS2,CDK5R1,SINHCAF,SALL1,BRCA1,BUB1B,ANP32E,UBE2S,PRMT1,TAF5,DNA2,RBBP4,POLE2,IFT81,TUSC3,UBE2C,DTL,ENC1,CCNJ,RFC4,SKP2,CCNA2,CCNB1,CCNE1,YEATS4,TIAM1,CCNB2,CCNE2,PRIM1,PRIM2,SMARCC1,CDK1,CDC20,SNRPD1,SNRPE,SNRPF,PCNA,CDK2,HDAC2
GO: Cellular Component	GO:0034709	methylosome			4.93e-05	0.03027	0.0004883	0.003417	4	12	PRMT1,SNRPD1,SNRPE,SNRPF
GO: Cellular Component	GO:0005658	alpha DNA polymerase:primase complex			5.978e-05	0.0367	0.0005798	0.004057	3	5	MCM3,PRIM1,PRIM2
GO: Cellular Component	GO:0044815	DNA packaging complex			6.043e-05	0.03711	0.0005798	0.004057	10	117	CENPA,H2AW,NCAPG,NCAPD2,MACROH2A2,TCF3,SMC4,NCAPH,H2AX,H2AZ1
GO: Cellular Component	GO:0042575	DNA polymerase complex			7.204e-05	0.04423	0.0006805	0.004762	6	39	MCM3,DNA2,POLE2,PRIM1,PRIM2,PCNA
GO: Cellular Component	GO:1990023	mitotic spindle midzone			9.684e-05	0.05946	0.0009009	0.006305	4	14	KIF18A,CENPE,KIF18B,AURKB
GO: Cellular Component	GO:0034715	pICln-Sm protein complex			0.0001179	0.07241	0.001081	0.007563	3	6	SNRPD1,SNRPE,SNRPF
GO: Cellular Component	GO:0045171	intercellular bridge			0.0001239	0.07606	0.001119	0.007827	7	61	KIF4A,CDC7,KIF23,CDCA8,CEP55,KIF20A,TPX2
GO: Cellular Component	GO:0099513	polymeric cytoskeletal fiber			0.0001693	0.1039	0.0015	0.0105	43	1313	NUSAP1,KNTC1,KIF18A,MAP2,CENPE,CENPF,MYO10,LRRC49,KIF4A,TUBB2B,DBN1,SEPTIN6,AURKA,NEK2,KIF15,ASPM,KIF14,NME1,PSRC1,KIF11,KIFC1,KIF2C,KIF23,NPTX2,FZD3,IFT81,PPP1R9A,BIRC5,STMN1,LMNB2,PRC1,SPAG5,KIF20A,LMNB1,TIAM1,SLC15A1,UNC5C,TPX2,RACGAP1,CDK1,CKAP2,KIF18B,AURKB
GO: Cellular Component	GO:0035098	ESC/E(Z) complex			0.000171	0.105	0.0015	0.0105	4	16	EZH2,JARID2,RBBP4,HDAC2
GO: Cellular Component	GO:0097431	mitotic spindle pole			0.0001986	0.1219	0.001717	0.01202	5	30	AURKA,ASPM,RAE1,SPAG5,AURKB
GO: Cellular Component	GO:0005828	kinetochore microtubule			0.0002036	0.125	0.001736	0.01215	3	7	KNTC1,KIF18A,CENPE
GO: Cellular Component	GO:0010369	chromocenter			0.0002204	0.1353	0.001838	0.01286	4	17	OIP5,SALL1,CDCA8,AURKB
GO: Cellular Component	GO:0043025	neuronal cell body			0.0002215	0.136	0.001838	0.01286	28	732	MAP2,MYO10,NCAM1,BRINP1,DBN1,RRM1,CHRNA5,GFRA1,AURKA,NELL2,CDK5R1,NRXN1,UCHL1,NPY,DPP6,NPTX2,FZD3,PPP1R9A,ENC1,ITGA8,INPP5F,TIAM1,UNC5C,TPX2,LRP4,ROBO1,ELAVL4,TMEM100
GO: Cellular Component	GO:0099512	supramolecular fiber			0.0003199	0.1964	0.002535	0.01774	47	1522	NUSAP1,KNTC1,KIF18A,MAP2,CENPE,CENPF,MYO10,LRRC49,KIF4A,TUBB2B,DBN1,SEPTIN6,SMPX,AURKA,NEK2,CDK5R1,KIF15,MYL6B,ASPM,KIF14,NME1,PSRC1,KIF11,KIFC1,KIF2C,COL2A1,KIF23,NPTX2,FZD3,IFT81,PPP1R9A,BIRC5,STMN1,LMNB2,PRC1,SPAG5,KIF20A,LMNB1,TIAM1,SLC15A1,UNC5C,TPX2,RACGAP1,CDK1,CKAP2,KIF18B,AURKB
GO: Cellular Component	GO:0031390	Ctf18 RFC-like complex			0.0003213	0.1973	0.002535	0.01774	3	8	DSCC1,RFC3,RFC4
GO: Cellular Component	GO:0016363	nuclear matrix			0.0003324	0.2041	0.002535	0.01774	9	118	CENPF,KIF4A,SRPK1,BLM,DNMT3A,ENC1,YEATS4,LMNB1,MYB
GO: Cellular Component	GO:0005971	ribonucleoside-diphosphate reductase complex			0.0003427	0.2104	0.002535	0.01774	2	2	RRM1,RRM2
GO: Cellular Component	GO:0097135	cyclin E2-CDK2 complex			0.0003427	0.2104	0.002535	0.01774	2	2	CCNE2,CDK2
GO: Cellular Component	GO:0097125	cyclin B1-CDK1 complex			0.0003427	0.2104	0.002535	0.01774	2	2	CCNB1,CDK1
GO: Cellular Component	GO:0031436	BRCA1-BARD1 complex			0.0003427	0.2104	0.002535	0.01774	2	2	BARD1,BRCA1
GO: Cellular Component	GO:1990077	primosome complex			0.0003427	0.2104	0.002535	0.01774	2	2	PRIM1,PRIM2
GO: Cellular Component	GO:0032301	MutSalpha complex			0.0003427	0.2104	0.002535	0.01774	2	2	MSH2,MSH6
GO: Cellular Component	GO:0001741	XY body			0.0003487	0.2141	0.002549	0.01784	4	19	DNMT3A,H2AX,SMARCC1,PLK4
GO: Cellular Component	GO:0099081	supramolecular polymer			0.0003542	0.2175	0.002558	0.0179	47	1529	NUSAP1,KNTC1,KIF18A,MAP2,CENPE,CENPF,MYO10,LRRC49,KIF4A,TUBB2B,DBN1,SEPTIN6,SMPX,AURKA,NEK2,CDK5R1,KIF15,MYL6B,ASPM,KIF14,NME1,PSRC1,KIF11,KIFC1,KIF2C,COL2A1,KIF23,NPTX2,FZD3,IFT81,PPP1R9A,BIRC5,STMN1,LMNB2,PRC1,SPAG5,KIF20A,LMNB1,TIAM1,SLC15A1,UNC5C,TPX2,RACGAP1,CDK1,CKAP2,KIF18B,AURKB
GO: Cellular Component	GO:0099080	supramolecular complex			0.0003646	0.2238	0.002603	0.01821	47	1531	NUSAP1,KNTC1,KIF18A,MAP2,CENPE,CENPF,MYO10,LRRC49,KIF4A,TUBB2B,DBN1,SEPTIN6,SMPX,AURKA,NEK2,CDK5R1,KIF15,MYL6B,ASPM,KIF14,NME1,PSRC1,KIF11,KIFC1,KIF2C,COL2A1,KIF23,NPTX2,FZD3,IFT81,PPP1R9A,BIRC5,STMN1,LMNB2,PRC1,SPAG5,KIF20A,LMNB1,TIAM1,SLC15A1,UNC5C,TPX2,RACGAP1,CDK1,CKAP2,KIF18B,AURKB
GO: Cellular Component	GO:0034708	methyltransferase complex			0.0004003	0.2458	0.002825	0.01977	9	121	KDM5B,EZH2,JARID2,PRMT1,RBBP4,SNRPD1,SNRPE,SNRPF,HDAC2
GO: Cellular Component	GO:0043203	axon hillock			0.0004753	0.2919	0.003317	0.02321	3	9	MAP2,AURKA,TPX2
GO: Cellular Component	GO:0044297	cell body			0.0006159	0.3782	0.004249	0.02974	29	820	MAP2,MYO10,NCAM1,BRINP1,DBN1,RRM1,CHRNA5,GFRA1,AURKA,NELL2,CDK5R1,NRXN1,UCHL1,NPY,DPP6,NPTX2,FZD3,PPP1R9A,ENC1,RBP1,ITGA8,INPP5F,TIAM1,UNC5C,TPX2,LRP4,ROBO1,ELAVL4,TMEM100
GO: Cellular Component	GO:0005680	anaphase-promoting complex			0.00063	0.3868	0.004298	0.03008	4	22	BUB1B,UBE2S,UBE2C,CDC20
GO: Cellular Component	GO:0032154	cleavage furrow			0.0007999	0.4911	0.005397	0.03777	6	60	SEPTIN6,ECT2,CEP55,KIF20A,RACGAP1,PLK4
GO: Cellular Component	GO:0000805	X chromosome			0.0009085	0.5578	0.006063	0.04243	3	11	MACROH2A2,H2AZ1,CDK2
GO: Cellular Component	GO:0097124	cyclin A2-CDK2 complex			0.0009969	0.6121	0.006443	0.04509	2	3	CCNA2,CDK2
GO: Cellular Component	GO:0000799	nuclear condensin complex			0.0009969	0.6121	0.006443	0.04509	2	3	NCAPD2,NCAPH
GO: Cellular Component	GO:1902737	dendritic filopodium			0.0009969	0.6121	0.006443	0.04509	2	3	MAP2,DBN1
GO: Cellular Component	GO:0036477	somatodendritic compartment			0.00108	0.6631	0.006907	0.04834	35	1096	MAP2,MYO10,NCAM1,BRINP1,DBN1,RRM1,ADCY2,CHRNA5,GFRA1,AURKA,NELL2,CDK5R1,CADM1,NRXN1,UCHL1,SYT1,WASF1,NPY,DPP6,NPTX2,FZD3,PPP1R9A,ENC1,ITGA8,INPP5F,RGS7,ZWINT,TIAM1,UNC5C,LRRTM2,TPX2,LRP4,ROBO1,ELAVL4,TMEM100
GO: Cellular Component	GO:0033202	DNA helicase complex			0.001103	0.6774	0.006984	0.04887	5	43	MCM3,ACTL6A,PRIM1,PRIM2,PCNA
GO: Cellular Component	GO:0005818	aster			0.001195	0.7337	0.007486	0.05239	3	12	KIF18A,TPX2,KIF18B
GO: Cellular Component	GO:0030424	axon			0.001223	0.7508	0.007583	0.05307	28	817	MAP2,KIF4A,NCAM1,DBN1,GFRA1,SEPTIN6,NMU,SLC38A1,AURKA,CDK5R1,CADM1,NRXN1,UCHL1,SYT1,NPY,RANBP1,NPTX2,NRTN,FZD3,PPP1R9A,INPP5F,TIAM1,UNC5C,LRRTM2,TPX2,AUTS2,ROBO1,ELAVL4
GO: Cellular Component	GO:0030894	replisome			0.001406	0.8633	0.008633	0.06042	4	27	MCM3,PRIM1,PRIM2,PCNA
GO: Cellular Component	GO:0090543	Flemming body			0.001849	1	0.01124	0.07865	4	29	KIF14,KIF23,CEP55,RACGAP1
GO: Cellular Component	GO:0072687	meiotic spindle			0.001924	1	0.01147	0.08025	3	14	AURKA,FBXO5,ASPM
GO: Cellular Component	GO:0016580	Sin3 complex			0.001924	1	0.01147	0.08025	3	14	SINHCAF,RBBP4,HDAC2
GO: Cellular Component	GO:0031617	NMS complex			0.001969	1	0.01152	0.08059	2	4	SPC25,NDC80
GO: Cellular Component	GO:0031262	Ndc80 complex			0.001969	1	0.01152	0.08059	2	4	SPC25,NDC80
GO: Cellular Component	GO:0043073	germ cell nucleus			0.002103	1	0.01218	0.08523	4	30	TRIP13,BLM,AURKA,H2AX
GO: Cellular Component	GO:0005652	nuclear lamina			0.002372	1	0.01358	0.09503	3	15	LMNB2,LMNB1,PCNA
GO: Cellular Component	GO:0032153	cell division site			0.002389	1	0.01358	0.09503	6	74	SEPTIN6,ECT2,CEP55,KIF20A,RACGAP1,PLK4
GO: Cellular Component	GO:0016581	NuRD complex			0.00288	1	0.01608	0.1125	3	16	SALL1,RBBP4,HDAC2
GO: Cellular Component	GO:0090545	CHD-type complex			0.00288	1	0.01608	0.1125	3	16	SALL1,RBBP4,HDAC2
GO: Cellular Component	GO:1990752	microtubule end			0.003007	1	0.01663	0.1164	4	33	ASPM,KIF2C,SPAG5,KIF18B
GO: Cellular Component	GO:0030426	growth cone			0.00319	1	0.01746	0.1222	11	226	MAP2,NCAM1,DBN1,CDK5R1,NRXN1,NPTX2,PPP1R9A,TIAM1,UNC5C,AUTS2,ELAVL4
GO: Cellular Component	GO:0005638	lamin filament			0.003242	1	0.01746	0.1222	2	5	LMNB2,LMNB1
GO: Cellular Component	GO:0005663	DNA replication factor C complex			0.003242	1	0.01746	0.1222	2	5	RFC3,RFC4
GO: Cellular Component	GO:0070603	SWI/SNF superfamily-type complex			0.003321	1	0.01765	0.1235	6	79	ACTL6A,SALL1,ANP32E,RBBP4,SMARCC1,HDAC2
GO: Cellular Component	GO:0031461	cullin-RING ubiquitin ligase complex			0.003378	1	0.01765	0.1235	9	164	CKS1B,CKS2,BUB1B,UBE2S,UBE2C,DTL,ENC1,SKP2,CDC20
GO: Cellular Component	GO:0000151	ubiquitin ligase complex			0.003428	1	0.01765	0.1235	13	296	CDK8,BARD1,BCOR,CKS1B,CKS2,BRCA1,BUB1B,UBE2S,UBE2C,DTL,ENC1,SKP2,CDC20
GO: Cellular Component	GO:0005892	acetylcholine-gated channel complex			0.00345	1	0.01765	0.1235	3	17	CHRNA1,CHRNA5,CHRNA9
GO: Cellular Component	GO:0000800	lateral element			0.00345	1	0.01765	0.1235	3	17	BLM,BRCA1,RAD51
GO: Cellular Component	GO:0070822	Sin3-type complex			0.00345	1	0.01765	0.1235	3	17	SINHCAF,RBBP4,HDAC2
GO: Cellular Component	GO:0030427	site of polarized growth			0.003765	1	0.0191	0.1337	11	231	MAP2,NCAM1,DBN1,CDK5R1,NRXN1,NPTX2,PPP1R9A,TIAM1,UNC5C,AUTS2,ELAVL4
GO: Cellular Component	GO:0005730	nucleolus			0.003961	1	0.01993	0.1395	42	1495	CDK8,NUSAP1,MYCN,ILF2,MAP2,ORC6,MYO10,HJURP,ETV4,MCM2,HMGB2,MCM3,MCM7,MCM10,NPM3,BLM,TYMS,NEK2,NRXN1,FEN1,MKI67,PIMREG,TAF5,NOVA1,RAD51,VRK1,RAE1,DTL,ENC1,WT1,APEX1,E2F5,CHD7,SIX1,SKP2,CDCA8,E2F8,PAX2,PRKDC,CDC6,PLK4,TOP2A
GO: Cellular Component	GO:0034719	SMN-Sm protein complex			0.004084	1	0.02039	0.1427	3	18	SNRPD1,SNRPE,SNRPF
GO: Cellular Component	GO:0031616	spindle pole centrosome			0.004785	1	0.0235	0.1645	3	19	DLGAP5,AURKA,AURKB
GO: Cellular Component	GO:0032797	SMN complex			0.004785	1	0.0235	0.1645	3	19	SNRPD1,SNRPE,SNRPF
GO: Cellular Component	GO:0030175	filopodium			0.005362	1	0.02613	0.1829	7	115	MAP2,MYO10,DBN1,NPTX2,FZD3,PPP1R9A,UNC5C
GO: Cellular Component	GO:0043005	neuron projection			0.006109	1	0.02953	0.2067	44	1624	MAP2,MYO10,ATP8A2,KIF4A,NCAM1,BRINP1,DBN1,ADCY2,CHRNA1,CHRNA5,GFRA1,SEPTIN6,NMU,SLC38A1,AURKA,NELL2,CDK5R1,CADM1,NRXN1,UCHL1,SYT1,WASF1,NPY,RANBP1,NPTX2,CHRNA9,NRTN,FZD3,PPP1R9A,ITGA8,STMN1,INPP5F,RGS7,ZWINT,TENM4,TIAM1,UNC5C,LRRTM2,TPX2,AUTS2,LRP4,ROBO1,ELAVL4,RGS17
GO: Cellular Component	GO:0150034	distal axon			0.006513	1	0.03114	0.218	16	432	MAP2,NCAM1,DBN1,SEPTIN6,NMU,CDK5R1,NRXN1,SYT1,NPY,NPTX2,PPP1R9A,TIAM1,UNC5C,LRRTM2,AUTS2,ELAVL4
GO: Cellular Component	GO:0005683	U7 snRNP			0.006645	1	0.03114	0.218	2	7	SNRPE,SNRPF
GO: Cellular Component	GO:0001740	Barr body			0.006645	1	0.03114	0.218	2	7	MACROH2A2,H2AZ1
GO: Cellular Component	GO:0070531	BRCA1-A complex			0.006645	1	0.03114	0.218	2	7	BARD1,BRCA1
GO: Cellular Component	GO:1990391	DNA repair complex			0.007856	1	0.03654	0.2557	4	43	MSH2,MSH6,PRKDC,KDM1A
GO: Cellular Component	GO:0001673	male germ cell nucleus			0.008284	1	0.03824	0.2676	3	23	TRIP13,BLM,H2AX
GO: Cellular Component	GO:0061673	mitotic spindle astral microtubule			0.008753	1	0.04011	0.2807	2	8	KIF18A,KIF18B
GO: Cellular Component	GO:0035371	microtubule plus-end			0.00934	1	0.04248	0.2973	3	24	KIF2C,SPAG5,KIF18B
GO: Cellular Component	GO:0098794	postsynapse			0.01023	1	0.04618	0.3231	25	825	DLG5,MAP2,WASF3,NCAM1,DBN1,CHRNA1,CHRNA5,ADD2,CDK5R1,LYPD1,CADM1,NRXN1,SYT1,WASF1,NPTX2,COL13A1,CHRNA9,PPP1R9A,SH3GL3,ITGA8,RGS7,TIAM1,NETO2,LRRTM2,LRP4
GO: Cellular Component	GO:0000118	histone deacetylase complex			0.01042	1	0.04659	0.326	5	72	SINHCAF,SALL1,ANP32E,RBBP4,HDAC2
GO: Cellular Component	GO:0043601	nuclear replisome			0.01047	1	0.04659	0.326	3	25	MCM3,PRIM1,PRIM2
GO: Cellular Component	GO:0005664	nuclear origin of replication recognition complex			0.01112	1	0.04876	0.3412	2	9	ORC6,MCM2
GO: Cellular Component	GO:0098892	extrinsic component of postsynaptic specialization membrane			0.01112	1	0.04876	0.3412	2	9	NPTX2,TIAM1
Human Phenotype	HP:0008678	Renal hypoplasia/aplasia			8.058e-09	2.538e-05	1.139e-05	9.829e-05	24	250	SOX11,BRIP1,EYA1,BCOR,MEOX1,SALL1,GPC3,BRCA1,ASPM,KIF14,SYT1,FGF8,RAD51,WT1,ITGA8,FANCL,CHD7,STIL,SIX1,CEP55,HMGA2,FANCI,LRP4,PAX2
Human Phenotype	HP:0000356	Abnormality of the outer ear			1.078e-08	3.395e-05	1.139e-05	9.829e-05	48	861	MYCN,SOX11,BRIP1,CENPE,ORC6,ZNF423,HMGB3,DLK1,EYA1,BCOR,EZH2,CHN1,TRIP13,CHRNA1,CDC45,MEOX1,HOXA2,BLM,SALL1,GPC3,PGAP1,BUB1,BUB1B,KIF14,PLAG1,KIF11,COL2A1,RAD51,DPP6,TCF3,COL13A1,RNASEH2A,NSD2,ITGA8,FANCL,CHD7,SIX1,GMNN,EDN3,HMGA2,FANCI,ASNS,DLL3,AUTS2,PRKDC,CDC6,PLK4,HELLS
Human Phenotype	HP:0040195	Decreased head circumference			1.446e-08	4.555e-05	1.139e-05	9.829e-05	47	839	MYCN,SOX11,BRIP1,CENPE,ORC6,HMGB3,MCM4,TUBB2B,EYA1,BCOR,CHN1,TRIP13,CDC45,BLM,SALL1,BRCA1,PGAP1,DHFR,BUB1,BUB1B,ASPM,KIF14,PLAG1,DNA2,KIF11,RAD51,DPP6,NRTN,RNASEH2A,NSD2,IARS1,WT1,FANCL,CHD7,STIL,SIX1,GMNN,EDN3,HMGA2,FANCI,ASNS,DLL3,AUTS2,PRKDC,CDC6,PLK4,PCNA
Human Phenotype	HP:0000252	Microcephaly			1.446e-08	4.555e-05	1.139e-05	9.829e-05	47	839	MYCN,SOX11,BRIP1,CENPE,ORC6,HMGB3,MCM4,TUBB2B,EYA1,BCOR,CHN1,TRIP13,CDC45,BLM,SALL1,BRCA1,PGAP1,DHFR,BUB1,BUB1B,ASPM,KIF14,PLAG1,DNA2,KIF11,RAD51,DPP6,NRTN,RNASEH2A,NSD2,IARS1,WT1,FANCL,CHD7,STIL,SIX1,GMNN,EDN3,HMGA2,FANCI,ASNS,DLL3,AUTS2,PRKDC,CDC6,PLK4,PCNA
Human Phenotype	HP:0002246	Abnormality of the duodenum			2.755e-08	8.679e-05	1.736e-05	0.0001499	11	50	MYCN,BRIP1,TRIP13,CDC45,SALL1,BUB1,BUB1B,RAD51,FANCL,CHD7,FANCI
Human Phenotype	HP:0000340	Sloping forehead			5.518e-08	0.0001738	2.897e-05	0.0002501	15	108	BRIP1,CENPE,TRIP13,BUB1,BUB1B,ASPM,KIF14,KIF11,RAD51,DPP6,FANCL,STIL,FANCI,ASNS,PLK4
Human Phenotype	HP:0002977	Aplasia/Hypoplasia involving the central nervous system			1.058e-07	0.0003333	4.275e-05	0.000369	59	1276	MYCN,SOX11,BRIP1,CENPE,ORC6,ATP8A2,ZNF423,HMGB3,MCM4,TUBB2B,EYA1,BCOR,CHN1,TRIP13,CDC45,BLM,SALL1,GPC3,BRCA1,UCHL1,PGAP1,DHFR,BUB1,BUB1B,ASPM,KIF14,PLAG1,FGF8,DNA2,FOXC1,KIF11,RAD51,DPP6,VRK1,NRTN,RNASEH2A,NSD2,IARS1,WT1,FANCL,CHD7,MSH2,STIL,SIX1,GMNN,EDN3,CEP55,MSH6,HMGA2,LMNB1,FANCI,ASNS,DLL3,AUTS2,PRKDC,CDC6,PLK4,KDM1A,PCNA
Human Phenotype	HP:0007364	Aplasia/Hypoplasia of the cerebrum			1.086e-07	0.000342	4.275e-05	0.000369	57	1210	MYCN,SOX11,BRIP1,CENPE,ORC6,ATP8A2,ZNF423,HMGB3,MCM4,TUBB2B,EYA1,BCOR,CHN1,TRIP13,CDC45,BLM,SALL1,GPC3,BRCA1,UCHL1,PGAP1,DHFR,BUB1,BUB1B,ASPM,KIF14,PLAG1,DNA2,FOXC1,KIF11,RAD51,DPP6,NRTN,RNASEH2A,NSD2,IARS1,WT1,FANCL,CHD7,MSH2,STIL,SIX1,GMNN,EDN3,CEP55,MSH6,HMGA2,LMNB1,FANCI,ASNS,DLL3,AUTS2,PRKDC,CDC6,PLK4,KDM1A,PCNA
Human Phenotype	HP:0004209	Clinodactyly of the 5th finger			1.566e-07	0.0004932	5.174e-05	0.0004466	22	248	BRIP1,CENPE,ORC6,BCOR,TRIP13,CDC45,BLM,HOXA11,SALL1,GPC3,BUB1,BUB1B,PLAG1,RAD51,FANCL,CHD7,GMNN,HMGA2,FANCI,CDC6,PLK4,KDM1A
Human Phenotype	HP:0001157	Clinodactyly of hands			1.682e-07	0.0005299	5.174e-05	0.0004466	22	249	BRIP1,CENPE,ORC6,BCOR,TRIP13,CDC45,BLM,HOXA11,SALL1,GPC3,BUB1,BUB1B,PLAG1,RAD51,FANCL,CHD7,GMNN,HMGA2,FANCI,CDC6,PLK4,KDM1A
Human Phenotype	HP:0009179	Deviation of the 5th finger			1.807e-07	0.0005691	5.174e-05	0.0004466	22	250	BRIP1,CENPE,ORC6,BCOR,TRIP13,CDC45,BLM,HOXA11,SALL1,GPC3,BUB1,BUB1B,PLAG1,RAD51,FANCL,CHD7,GMNN,HMGA2,FANCI,CDC6,PLK4,KDM1A
Human Phenotype	HP:0040019	Finger clinodactyly			2.082e-07	0.0006557	5.464e-05	0.0004717	22	252	BRIP1,CENPE,ORC6,BCOR,TRIP13,CDC45,BLM,HOXA11,SALL1,GPC3,BUB1,BUB1B,PLAG1,RAD51,FANCL,CHD7,GMNN,HMGA2,FANCI,CDC6,PLK4,KDM1A
Human Phenotype	HP:0009778	Short thumb			3.092e-07	0.0009741	7.327e-05	0.0006325	12	76	BRIP1,BCOR,BRCA1,COL2A1,RAD51,NSD2,FANCL,CHD7,LMNB2,FANCI,FZD2,KDM1A
Human Phenotype	HP:0004207	Abnormal 5th finger morphology			3.357e-07	0.001058	7.327e-05	0.0006325	26	349	MYCN,SOX11,BRIP1,CENPE,ORC6,ZNF423,BCOR,TRIP13,CDC45,BLM,HOXA11,SALL1,GPC3,BUB1,BUB1B,PLAG1,COL2A1,RAD51,FANCL,CHD7,GMNN,HMGA2,FANCI,CDC6,PLK4,KDM1A
Human Phenotype	HP:0009879	Simplified gyral pattern			3.489e-07	0.001099	7.327e-05	0.0006325	9	39	CENPE,ATP8A2,TUBB2B,ASPM,KIF11,STIL,ASNS,PRKDC,PLK4
Human Phenotype	HP:0000347	Micrognathia			4.122e-07	0.001299	8.116e-05	0.0007006	34	555	MYCN,BRIP1,CENPE,ORC6,DLK1,EYA1,EZH2,CHN1,TRIP13,CHRNA1,CDC45,BUB1,BUB1B,KIF14,PLAG1,ECEL1,DNA2,COL2A1,RAD51,COL13A1,NSD2,WT1,FANCL,CHD7,SIX1,GMNN,HMGA2,FANCI,ASNS,LRP4,CDC6,FZD2,PLK4,HELLS
Human Phenotype	HP:0009118	Aplasia/Hypoplasia of the mandible			4.693e-07	0.001478	8.696e-05	0.0007507	34	558	MYCN,BRIP1,CENPE,ORC6,DLK1,EYA1,EZH2,CHN1,TRIP13,CHRNA1,CDC45,BUB1,BUB1B,KIF14,PLAG1,ECEL1,DNA2,COL2A1,RAD51,COL13A1,NSD2,WT1,FANCL,CHD7,SIX1,GMNN,HMGA2,FANCI,ASNS,LRP4,CDC6,FZD2,PLK4,HELLS
Human Phenotype	HP:0000240	Abnormality of skull size			7.517e-07	0.002368	0.0001298	0.001121	54	1175	MYCN,SOX11,BRIP1,CENPE,ORC6,HMGB3,MCM4,TUBB2B,EYA1,BCOR,EZH2,CHN1,TRIP13,CDC45,BLM,SALL1,GPC3,BRCA1,PGAP1,DHFR,BUB1,BUB1B,ASPM,KIF14,PLAG1,DNA2,KIF11,DNMT3A,COL2A1,RAD51,DPP6,NRTN,RNASEH2A,NSD2,IARS1,WT1,FANCL,CHD7,STIL,SIX1,GMNN,EDN3,HMGA2,FANCI,ASNS,DLL3,AUTS2,LRP4,PRKDC,CDC6,PLK4,KDM1A,PCNA,HELLS
Human Phenotype	HP:0000957	Cafe-au-lait spot			7.831e-07	0.002467	0.0001298	0.001121	13	98	BRIP1,TRIP13,BLM,BRCA1,BUB1,BUB1B,PLAG1,RAD51,FANCL,MSH2,MSH6,HMGA2,FANCI
Human Phenotype	HP:0030084	Clinodactyly			9.24e-07	0.00291	0.0001434	0.001238	24	320	SOX11,BRIP1,CENPE,ORC6,BCOR,EZH2,TRIP13,CDC45,BLM,HOXA11,SALL1,GPC3,BUB1,BUB1B,PLAG1,RAD51,FANCL,CHD7,GMNN,HMGA2,FANCI,CDC6,PLK4,KDM1A
Human Phenotype	HP:0000047	Hypospadias			9.561e-07	0.003012	0.0001434	0.001238	22	275	BRIP1,ORC6,BCOR,TRIP13,CDC45,SALL1,GPC3,BUB1,BUB1B,SYT1,PLAG1,FOXC1,RAD51,NSD2,WT1,FANCL,GMNN,HMGA2,FANCI,DLL3,CDC6,FZD2
Human Phenotype	HP:0009381	Short finger			1.221e-06	0.003846	0.0001748	0.001509	19	214	SOX11,BRIP1,BCOR,CHRNA1,GPC3,BRCA1,PLAG1,COL2A1,RAD51,NSD2,FANCL,CHD7,LMNB2,GMNN,HMGA2,FANCI,LRP4,FZD2,KDM1A
Human Phenotype	HP:0009466	Radial deviation of finger			1.317e-06	0.00415	0.0001804	0.001558	23	303	BRIP1,CENPE,ORC6,BCOR,EZH2,TRIP13,CDC45,BLM,HOXA11,SALL1,GPC3,BUB1,BUB1B,PLAG1,RAD51,FANCL,CHD7,GMNN,HMGA2,FANCI,CDC6,PLK4,KDM1A
Human Phenotype	HP:0009601	Aplasia/Hypoplasia of the thumb			1.402e-06	0.004416	0.000184	0.001589	13	103	BRIP1,BCOR,CHN1,BRCA1,COL2A1,RAD51,NSD2,FANCL,CHD7,LMNB2,FANCI,FZD2,KDM1A
Human Phenotype	HP:0009485	Radial deviation of the hand or of fingers of the hand			1.755e-06	0.005529	0.0002212	0.001909	23	308	BRIP1,CENPE,ORC6,BCOR,EZH2,TRIP13,CDC45,BLM,HOXA11,SALL1,GPC3,BUB1,BUB1B,PLAG1,RAD51,FANCL,CHD7,GMNN,HMGA2,FANCI,CDC6,PLK4,KDM1A
Human Phenotype	HP:0100627	Displacement of the urethral meatus			1.977e-06	0.006229	0.0002396	0.002068	22	287	BRIP1,ORC6,BCOR,TRIP13,CDC45,SALL1,GPC3,BUB1,BUB1B,SYT1,PLAG1,FOXC1,RAD51,NSD2,WT1,FANCL,GMNN,HMGA2,FANCI,DLL3,CDC6,FZD2
Human Phenotype	HP:0009116	Aplasia/Hypoplasia involving bones of the skull			2.208e-06	0.006956	0.0002576	0.002224	37	681	MYCN,BRIP1,CENPE,ORC6,DLK1,EYA1,EZH2,CHN1,TRIP13,CHRNA1,CDC45,BUB1,BUB1B,KIF14,PLAG1,FGF8,ECEL1,DNA2,FOXC1,COL2A1,RAD51,COL13A1,NSD2,WT1,FANCL,CHD7,SIX1,GMNN,DNAAF2,HMGA2,FANCI,ASNS,LRP4,CDC6,FZD2,PLK4,HELLS
Human Phenotype	HP:0006265	Aplasia/Hypoplasia of fingers			2.346e-06	0.007389	0.0002639	0.002278	20	245	SOX11,BRIP1,BCOR,CHN1,CHRNA1,GPC3,BRCA1,PLAG1,COL2A1,RAD51,NSD2,FANCL,CHD7,LMNB2,GMNN,HMGA2,FANCI,LRP4,FZD2,KDM1A
Human Phenotype	HP:0000324	Facial asymmetry			2.695e-06	0.008488	0.0002908	0.002511	13	109	MYCN,BRIP1,EYA1,CHN1,MEOX1,SALL1,RAD51,NSD2,FANCL,CHD7,SIX1,NBAS,FANCI
Human Phenotype	HP:0008572	External ear malformation			2.77e-06	0.008725	0.0002908	0.002511	11	77	BRIP1,EYA1,BCOR,CHN1,SALL1,RAD51,TCF3,FANCL,CHD7,SIX1,FANCI
Human Phenotype	HP:0100667	Brachydactyly (hand)			3.224e-06	0.01016	0.0003276	0.002828	23	319	MYCN,SOX11,BRIP1,BCOR,EZH2,CHRNA1,SALL1,GPC3,BRCA1,PLAG1,COL2A1,RAD51,DPP6,NSD2,FANCL,CHD7,LMNB2,GMNN,HMGA2,FANCI,LRP4,FZD2,KDM1A
Human Phenotype	HP:0001999	Abnormal facial shape			3.485e-06	0.01098	0.000343	0.002961	44	905	MYCN,SOX11,BRIP1,CENPE,ORC6,ZNF423,KIF4A,DLK1,EYA1,BCOR,EZH2,CHN1,TRIP13,CHRNA1,CDC45,MEOX1,BLM,SALL1,GPC3,BUB1,BUB1B,PLAG1,FGF8,ECEL1,FOXC1,DNMT3A,COL2A1,RAD51,NRTN,NSD2,ITGA8,FANCL,CHD7,SIX1,GMNN,EDN3,NBAS,HMGA2,FANCI,AUTS2,CDC6,FZD2,PLK4,HELLS
Human Phenotype	HP:0002060	Abnormal cerebral morphology			3.741e-06	0.01178	0.0003571	0.003083	62	1511	MYCN,SOX11,BRIP1,CENPE,ORC6,ATP8A2,ZNF423,HMGB3,MCM4,TUBB2B,EYA1,BCOR,EZH2,CHN1,TRIP13,CDC45,HOXA2,BLM,SALL1,GPC3,BRCA1,UCHL1,PGAP1,DHFR,BUB1,BUB1B,ASPM,KIF14,PLAG1,FGF8,DNA2,FOXC1,KIF11,COL2A1,RAD51,DPP6,VRK1,NRTN,RNASEH2A,NSD2,IARS1,WT1,FANCL,CHD7,MSH2,STIL,SIX1,GMNN,EDN3,CEP55,MSH6,HMGA2,LMNB1,FANCI,ASNS,DLL3,AUTS2,PRKDC,CDC6,PLK4,KDM1A,PCNA
Human Phenotype	HP:0030669	Abnormal ocular adnexa morphology			4.107e-06	0.01294	0.0003646	0.003147	49	1070	MYCN,SOX11,BRIP1,CENPE,ORC6,ZNF423,TUBB2B,DLK1,EYA1,BCOR,EZH2,CHN1,TRIP13,CHRNA1,STAT4,CDC45,BLM,SALL1,GPC3,BUB1,BUB1B,ASPM,ECEL1,FOXC1,KIF11,DNMT3A,RAD51,DPP6,TCF3,RNASEH2A,NSD2,WT1,ITGA8,FANCL,CHD7,STIL,SIX1,GMNN,EDN3,NBAS,HMGA2,FANCI,AUTS2,LRP4,SNRPE,PLK4,KDM1A,PCNA,HELLS
Human Phenotype	HP:0100547	Abnormality of forebrain morphology			4.126e-06	0.013	0.0003646	0.003147	62	1515	MYCN,SOX11,BRIP1,CENPE,ORC6,ATP8A2,ZNF423,HMGB3,MCM4,TUBB2B,EYA1,BCOR,EZH2,CHN1,TRIP13,CDC45,HOXA2,BLM,SALL1,GPC3,BRCA1,UCHL1,PGAP1,DHFR,BUB1,BUB1B,ASPM,KIF14,PLAG1,FGF8,DNA2,FOXC1,KIF11,COL2A1,RAD51,DPP6,VRK1,NRTN,RNASEH2A,NSD2,IARS1,WT1,FANCL,CHD7,MSH2,STIL,SIX1,GMNN,EDN3,CEP55,MSH6,HMGA2,LMNB1,FANCI,ASNS,DLL3,AUTS2,PRKDC,CDC6,PLK4,KDM1A,PCNA
Human Phenotype	HP:0004097	Deviation of finger			4.166e-06	0.01312	0.0003646	0.003147	24	348	BRIP1,CENPE,ORC6,BCOR,EZH2,TRIP13,CDC45,BLM,HOXA11,SALL1,GPC3,BUB1,BUB1B,PLAG1,RAD51,FANCL,CHD7,GMNN,HMGA2,FANCI,PRKDC,CDC6,PLK4,KDM1A
Human Phenotype	HP:0100542	Abnormal localization of kidney			4.557e-06	0.01435	0.0003775	0.003259	15	151	SOX11,BRIP1,CHN1,SALL1,GPC3,BRCA1,SYT1,DNA2,RAD51,WT1,FANCL,CHD7,HMGA2,FANCI,PAX2
Human Phenotype	HP:0000130	Abnormality of the uterus			4.641e-06	0.01462	0.0003775	0.003259	20	256	BRIP1,EZH2,AURKA,SALL1,BRCA1,BUB1,BUB1B,SYT1,FGF8,RAD51,NSD2,WT1,ITGA8,FANCL,CHD7,MSH2,ODC1,MSH6,HMGA2,FANCI
Human Phenotype	HP:0005922	Abnormal hand morphology			4.674e-06	0.01472	0.0003775	0.003259	23	326	SOX11,BRIP1,CENPE,BCOR,EZH2,CHRNA1,GPC3,BRCA1,PLAG1,COL2A1,RAD51,NSD2,FANCL,CHD7,LMNB2,GMNN,HMGA2,FANCI,ASNS,LRP4,PRKDC,FZD2,KDM1A
Human Phenotype	HP:0000369	Low-set ears			5.066e-06	0.01596	0.0003896	0.003363	30	507	MYCN,SOX11,ORC6,ZNF423,EYA1,BCOR,EZH2,TRIP13,CHRNA1,CDC45,GPC3,BUB1,BUB1B,KIF14,PLAG1,COL2A1,COL13A1,RNASEH2A,NSD2,ITGA8,CHD7,SIX1,GMNN,EDN3,HMGA2,DLL3,AUTS2,PRKDC,CDC6,HELLS
Human Phenotype	HP:0031105	Abnormal uterus morphology			5.071e-06	0.01597	0.0003896	0.003363	16	172	BRIP1,EZH2,AURKA,SALL1,BRCA1,BUB1,BUB1B,SYT1,RAD51,ITGA8,FANCL,MSH2,ODC1,MSH6,HMGA2,FANCI
Human Phenotype	HP:0100684	Salivary gland neoplasm			5.605e-06	0.01766	0.0004204	0.003629	4	6	PLAG1,MSH2,MSH6,HMGA2
Human Phenotype	HP:0000069	Abnormality of the ureter			6.244e-06	0.01967	0.0004574	0.003948	20	261	BRIP1,EYA1,BCOR,CDC45,SALL1,GPC3,BRCA1,ASPM,SYT1,PLAG1,RAD51,WT1,FANCL,CHD7,STIL,SIX1,HMGA2,FANCI,DLL3,PAX2
Human Phenotype	HP:0000104	Renal agenesis			6.978e-06	0.02198	0.0004884	0.004217	14	137	EYA1,GPC3,BRCA1,ASPM,KIF14,SYT1,FGF8,WT1,ITGA8,CHD7,STIL,SIX1,CEP55,LRP4
Human Phenotype	HP:0009774	Triangular shaped phalanges of the hand			6.978e-06	0.02198	0.0004884	0.004217	14	137	MYCN,BRIP1,BCOR,EZH2,CHN1,SALL1,GPC3,BRCA1,COL2A1,RAD51,DPP6,FANCL,FANCI,FZD2
Human Phenotype	HP:0001172	Abnormal thumb morphology			7.871e-06	0.02479	0.0005365	0.004631	20	265	BRIP1,BCOR,EZH2,CHN1,SALL1,GPC3,BRCA1,ECEL1,COL2A1,RAD51,DPP6,NRTN,NSD2,FANCL,CHD7,LMNB2,EDN3,FANCI,FZD2,KDM1A
Human Phenotype	HP:0000357	Abnormal location of ears			8.004e-06	0.02521	0.0005365	0.004631	31	546	MYCN,SOX11,ORC6,ZNF423,HMGB3,EYA1,BCOR,EZH2,TRIP13,CHRNA1,CDC45,GPC3,BUB1,BUB1B,KIF14,PLAG1,COL2A1,COL13A1,RNASEH2A,NSD2,ITGA8,CHD7,SIX1,GMNN,EDN3,HMGA2,DLL3,AUTS2,PRKDC,CDC6,HELLS
Human Phenotype	HP:0006721	Acute lymphoblastic leukemia			9e-06	0.02835	0.0005906	0.005099	14	140	BRIP1,ETV1,ETV4,EZH2,TRIP13,GPC3,BUB1,BUB1B,RAD51,WT1,FANCL,STIL,FANCI,MYB
Human Phenotype	HP:0000315	Abnormality of the orbital region			9.46e-06	0.0298	0.0006081	0.00525	60	1478	MYCN,SOX11,BRIP1,CENPE,ORC6,ZNF423,ETV1,ETV4,HMGB3,TUBB2B,DLK1,EYA1,BCOR,EZH2,CHN1,TRIP13,CHRNA1,STAT4,CDC45,BLM,NEK2,SALL2,SALL1,GPC3,BRCA1,BUB1,BUB1B,ASPM,FGF8,ECEL1,FOXC1,KIF11,DNMT3A,COL2A1,RAD51,DPP6,TCF3,RNASEH2A,NSD2,WT1,ITGA8,FANCL,CHD7,STIL,SIX1,GMNN,EDN3,NBAS,HMGA2,FANCI,AUTS2,LRP4,PAX2,PRKDC,FZD2,SNRPE,PLK4,KDM1A,PCNA,HELLS
Human Phenotype	HP:0009484	Deviation of the hand or of fingers of the hand			1.002e-05	0.03155	0.000631	0.005447	24	366	BRIP1,CENPE,ORC6,BCOR,EZH2,TRIP13,CDC45,BLM,HOXA11,SALL1,GPC3,BUB1,BUB1B,PLAG1,RAD51,FANCL,CHD7,GMNN,HMGA2,FANCI,PRKDC,CDC6,PLK4,KDM1A
Human Phenotype	HP:0000002	Abnormality of body height			1.121e-05	0.0353	0.0006922	0.005975	53	1241	SOX11,BRIP1,CENPE,ORC6,ATP8A2,HMGB3,TUBB2B,DLK1,EYA1,BCOR,EZH2,CHN1,TRIP13,CDC45,BLM,NEK2,SALL1,GPC3,BRCA1,PGAP1,BUB1,BUB1B,ASPM,PLAG1,FGF8,ECEL1,DNA2,KIF11,DNMT3A,COL2A1,RAD51,DPP6,KIF23,NRTN,NSD2,WT1,FANCL,CHD7,STIL,GMNN,EDN3,NBAS,HMGA2,FANCI,DLL3,AUTS2,LRP4,CDC6,FZD2,PLK4,KDM1A,PCNA,HELLS
Human Phenotype	HP:0000277	Abnormality of the mandible			1.175e-05	0.037	0.0007115	0.006142	37	730	MYCN,BRIP1,CENPE,ORC6,DLK1,EYA1,EZH2,CHN1,TRIP13,CHRNA1,CDC45,GPC3,BUB1,BUB1B,KIF14,PLAG1,ECEL1,DNA2,KIF11,COL2A1,RAD51,COL13A1,NSD2,WT1,ITGA8,FANCL,CHD7,SIX1,GMNN,HMGA2,FANCI,ASNS,LRP4,CDC6,FZD2,PLK4,HELLS
Human Phenotype	HP:0004322	Short stature			1.221e-05	0.03847	0.0007259	0.006266	49	1110	SOX11,BRIP1,CENPE,ORC6,ATP8A2,HMGB3,TUBB2B,DLK1,EYA1,BCOR,CHN1,TRIP13,CDC45,BLM,NEK2,SALL1,BRCA1,PGAP1,BUB1,BUB1B,ASPM,PLAG1,FGF8,ECEL1,DNA2,KIF11,COL2A1,RAD51,DPP6,KIF23,NRTN,NSD2,WT1,FANCL,CHD7,STIL,GMNN,EDN3,NBAS,HMGA2,FANCI,DLL3,AUTS2,CDC6,FZD2,PLK4,KDM1A,PCNA,HELLS
Human Phenotype	HP:0008050	Abnormality of the palpebral fissures			1.248e-05	0.03931	0.000728	0.006284	30	530	MYCN,SOX11,BRIP1,CENPE,ORC6,DLK1,BCOR,EZH2,CHN1,TRIP13,SALL1,GPC3,BUB1,BUB1B,ASPM,KIF11,DNMT3A,RAD51,DPP6,NSD2,FANCL,CHD7,STIL,GMNN,EDN3,FANCI,AUTS2,LRP4,PLK4,KDM1A
Human Phenotype	HP:0011100	Intestinal atresia			1.299e-05	0.04093	0.0007442	0.006424	8	45	MYCN,TRIP13,SALL1,BUB1,BUB1B,NRTN,CHD7,EDN3
Human Phenotype	HP:0009892	Anotia			1.584e-05	0.0499	0.0008911	0.007692	5	14	ORC6,CDC45,HOXA2,GMNN,CDC6
Human Phenotype	HP:0002859	Rhabdomyosarcoma			1.618e-05	0.05096	0.0008941	0.007718	11	92	ETV1,ETV4,EZH2,TRIP13,GPC3,BRCA1,BUB1,BUB1B,WT1,MSH2,MSH6
Human Phenotype	HP:0000175	Cleft palate			1.73e-05	0.05448	0.0009323	0.008048	29	511	SOX11,BRIP1,ORC6,EYA1,BCOR,CHN1,TRIP13,CHRNA1,CDC45,MEOX1,HOXA2,GPC3,BUB1,BUB1B,FGF8,ECEL1,COL2A1,RAD51,SLC25A21,NSD2,ITGA8,FANCL,CHD7,SIX1,GMNN,ARID3B,FANCI,DLL3,CDC6
Human Phenotype	HP:0100737	Abnormal hard palate morphology			1.796e-05	0.05658	0.0009323	0.008048	29	512	SOX11,BRIP1,ORC6,EYA1,BCOR,CHN1,TRIP13,CHRNA1,CDC45,MEOX1,HOXA2,GPC3,BUB1,BUB1B,FGF8,ECEL1,COL2A1,RAD51,SLC25A21,NSD2,ITGA8,FANCL,CHD7,SIX1,GMNN,ARID3B,FANCI,DLL3,CDC6
Human Phenotype	HP:0001515	Prenatal growth deficiency			1.805e-05	0.05687	0.0009323	0.008048	26	431	SOX11,BRIP1,CENPE,ORC6,MCM4,TRIP13,CHRNA1,CDC45,BLM,BUB1,BUB1B,KIF14,PLAG1,RAD51,RNASEH2A,NSD2,IARS1,FANCL,CHD7,GMNN,HMGA2,FANCI,DLL3,PRKDC,CDC6,PLK4
Human Phenotype	HP:0001511	Intrauterine growth retardation			1.805e-05	0.05687	0.0009323	0.008048	26	431	SOX11,BRIP1,CENPE,ORC6,MCM4,TRIP13,CHRNA1,CDC45,BLM,BUB1,BUB1B,KIF14,PLAG1,RAD51,RNASEH2A,NSD2,IARS1,FANCL,CHD7,GMNN,HMGA2,FANCI,DLL3,PRKDC,CDC6,PLK4
Human Phenotype	HP:0100736	Abnormal soft palate morphology			1.926e-05	0.06065	0.0009783	0.008445	13	130	BRIP1,ORC6,EYA1,BCOR,CDC45,KIF14,RAD51,FANCL,CHD7,SIX1,GMNN,FANCI,CDC6
Human Phenotype	HP:0000172	Abnormality of the uvula			2.041e-05	0.0643	0.001018	0.008791	12	112	BRIP1,ORC6,EYA1,BCOR,CDC45,KIF14,RAD51,FANCL,SIX1,GMNN,FANCI,CDC6
Human Phenotype	HP:0009122	Aplasia/hypoplasia affecting bones of the axial skeleton			2.069e-05	0.06517	0.001018	0.008791	37	748	MYCN,BRIP1,CENPE,ORC6,DLK1,EYA1,EZH2,CHN1,TRIP13,CHRNA1,CDC45,BUB1,BUB1B,KIF14,PLAG1,FGF8,ECEL1,DNA2,FOXC1,COL2A1,RAD51,COL13A1,NSD2,WT1,FANCL,CHD7,SIX1,GMNN,DNAAF2,HMGA2,FANCI,ASNS,LRP4,CDC6,FZD2,PLK4,HELLS
Human Phenotype	HP:0002247	Duodenal atresia			2.134e-05	0.06723	0.001034	0.008929	6	24	MYCN,TRIP13,SALL1,BUB1,BUB1B,CHD7
Human Phenotype	HP:0009602	Abnormality of thumb phalanx			2.272e-05	0.07157	0.001084	0.009361	13	132	BRIP1,BCOR,EZH2,CHN1,SALL1,GPC3,BRCA1,COL2A1,RAD51,DPP6,FANCL,FANCI,FZD2
Human Phenotype	HP:0000598	Abnormality of the ear			2.349e-05	0.074	0.001094	0.009444	67	1775	MYCN,SOX11,BRIP1,CENPE,ORC6,ZNF423,MCM2,HMGB3,DLK1,EYA1,BCOR,EZH2,CHN1,TRIP13,CHRNA1,STAT4,SMPX,CDC45,HOXA1,MEOX1,HOXA2,BLM,HOXA11,NEK2,SALL1,GPC3,BRCA1,PGAP1,BUB1,BUB1B,ASPM,KIF14,PLAG1,FGF8,FOXC1,KIF11,COL2A1,RAD51,DPP6,TCF3,COL13A1,NRTN,RNASEH2A,NSD2,IARS1,WT1,ITGA8,FANCL,CHD7,LMNB2,SIX1,GMNN,EDN3,DNAAF2,HMGA2,LMNB1,FANCI,ASNS,DLL3,AUTS2,LRP4,TMPO,PAX2,PRKDC,CDC6,PLK4,HELLS
Human Phenotype	HP:0002916	Abnormality of chromosome segregation			2.416e-05	0.07609	0.001094	0.009444	10	79	BRIP1,TRIP13,BLM,BRCA1,BUB1,BUB1B,RAD51,FANCL,FANCI,HELLS
Human Phenotype	HP:0001167	Abnormality of finger			2.434e-05	0.07668	0.001094	0.009444	41	877	MYCN,SOX11,BRIP1,CENPE,ORC6,ZNF423,DLK1,BCOR,EZH2,CHN1,TRIP13,CHRNA1,CDC45,BLM,HOXA11,SALL1,GPC3,BRCA1,BUB1,BUB1B,PLAG1,ECEL1,COL2A1,RAD51,DPP6,NRTN,NSD2,FANCL,CHD7,LMNB2,GMNN,EDN3,HMGA2,FANCI,DLL3,LRP4,PRKDC,CDC6,FZD2,PLK4,KDM1A
Human Phenotype	HP:0002244	Abnormality of the small intestine			2.443e-05	0.07694	0.001094	0.009444	18	239	MYCN,BRIP1,MCM6,EZH2,TRIP13,CDC45,SALL1,GPC3,BUB1,BUB1B,RAD51,NRTN,NSD2,FANCL,CHD7,EDN3,HMGA2,FANCI
Human Phenotype	HP:0009115	Aplasia/hypoplasia involving the skeleton			2.529e-05	0.07966	0.001094	0.009444	48	1105	MYCN,SOX11,BRIP1,CENPE,ORC6,DLK1,EYA1,BCOR,EZH2,CHN1,TRIP13,CHRNA1,CDC45,NEK2,SALL1,GPC3,BRCA1,BUB1,BUB1B,KIF14,PLAG1,FGF8,ECEL1,DNA2,FOXC1,COL2A1,RAD51,COL13A1,NSD2,WT1,FANCL,CHD7,LMNB2,STIL,SIX1,GMNN,DNAAF2,NBAS,HMGA2,FANCI,ASNS,LRP4,CDC6,FZD2,PLK4,KDM1A,MYB,HELLS
Human Phenotype	HP:0030791	Abnormal jaw morphology			2.535e-05	0.07986	0.001094	0.009444	39	816	MYCN,BRIP1,CENPE,ORC6,DLK1,EYA1,EZH2,CHN1,TRIP13,CHRNA1,CDC45,GPC3,BUB1,BUB1B,KIF14,PLAG1,FGF8,ECEL1,DNA2,FOXC1,KIF11,COL2A1,RAD51,COL13A1,NSD2,WT1,ITGA8,FANCL,CHD7,SIX1,GMNN,HMGA2,FANCI,ASNS,LRP4,CDC6,FZD2,PLK4,HELLS
Human Phenotype	HP:0000209	Abnormality of the jaws			2.535e-05	0.07986	0.001094	0.009444	39	816	MYCN,BRIP1,CENPE,ORC6,DLK1,EYA1,EZH2,CHN1,TRIP13,CHRNA1,CDC45,GPC3,BUB1,BUB1B,KIF14,PLAG1,FGF8,ECEL1,DNA2,FOXC1,KIF11,COL2A1,RAD51,COL13A1,NSD2,WT1,ITGA8,FANCL,CHD7,SIX1,GMNN,HMGA2,FANCI,ASNS,LRP4,CDC6,FZD2,PLK4,HELLS
Human Phenotype	HP:0007378	Neoplasm of the gastrointestinal tract			2.779e-05	0.08754	0.001183	0.01021	23	363	MYCN,BRIP1,ETV1,ETV4,EZH2,TRIP13,BLM,AURKA,GPC3,BRCA1,BUB1,BUB1B,PLAG1,RAD51,NRTN,WT1,FANCL,MSH2,ODC1,EDN3,MSH6,HMGA2,FANCI
Human Phenotype	HP:0009728	Neoplasm of striated muscle			3.267e-05	0.1029	0.001372	0.01185	11	99	ETV1,ETV4,EZH2,TRIP13,GPC3,BRCA1,BUB1,BUB1B,WT1,MSH2,MSH6
Human Phenotype	HP:0001549	Abnormal ileum morphology			3.381e-05	0.1065	0.001401	0.0121	8	51	BRIP1,GPC3,RAD51,NRTN,FANCL,EDN3,HMGA2,FANCI
Human Phenotype	HP:0000795	Abnormality of the urethra			3.547e-05	0.1117	0.001451	0.01252	22	343	BRIP1,ORC6,BCOR,TRIP13,CDC45,SALL1,GPC3,BUB1,BUB1B,SYT1,PLAG1,FOXC1,RAD51,NSD2,WT1,FANCL,GMNN,HMGA2,FANCI,DLL3,CDC6,FZD2
Human Phenotype	HP:0000153	Abnormality of the mouth			3.728e-05	0.1174	0.001505	0.013	67	1797	MYCN,SOX11,BRIP1,CENPE,ORC6,ZNF423,TUBB2B,DLK1,EYA1,BCOR,EZH2,CHN1,TRIP13,CHRNA1,STAT4,CDC45,MEOX1,HOXA2,BLM,SALL1,GPC3,NRXN1,PGAP1,BUB1,BUB1B,ASPM,KIF14,PLAG1,FGF8,ECEL1,DNA2,FOXC1,KIF11,COL2A1,RAD51,DPP6,TCF3,SLC25A21,KIF23,COL13A1,NSD2,SOBP,WT1,ITGA8,FANCL,CHD7,MSH2,LMNB2,STIL,SIX1,GMNN,EDN3,ARID3B,NBAS,MSH6,HMGA2,FANCI,ASNS,DLL3,AUTS2,LRP4,PRKDC,CDC6,FZD2,PLK4,KDM1A,HELLS
Human Phenotype	HP:0008551	Microtia			3.776e-05	0.1189	0.001506	0.013	12	119	ORC6,DLK1,EYA1,CDC45,HOXA2,SALL1,NSD2,FANCL,CHD7,SIX1,GMNN,CDC6
Human Phenotype	HP:0040012	Chromosome breakage			4.607e-05	0.1451	0.001814	0.01566	5	17	BRIP1,BLM,BRCA1,FANCL,FANCI
Human Phenotype	HP:0000202	Oral cleft			5.112e-05	0.161	0.001988	0.01716	29	541	SOX11,BRIP1,ORC6,EYA1,BCOR,CHN1,TRIP13,CHRNA1,CDC45,MEOX1,HOXA2,GPC3,BUB1,BUB1B,FGF8,ECEL1,COL2A1,RAD51,SLC25A21,NSD2,ITGA8,FANCL,CHD7,SIX1,GMNN,ARID3B,FANCI,DLL3,CDC6
Human Phenotype	HP:0008772	Aplasia/Hypoplasia of the external ear			5.255e-05	0.1655	0.002019	0.01743	12	123	ORC6,DLK1,EYA1,CDC45,HOXA2,SALL1,NSD2,FANCL,CHD7,SIX1,GMNN,CDC6
Human Phenotype	HP:0000929	Abnormal skull morphology			5.496e-05	0.1731	0.002086	0.01801	67	1816	MYCN,SOX11,BRIP1,CENPE,ORC6,ZNF423,HMGB3,MCM4,TUBB2B,DLK1,EYA1,BCOR,EZH2,CHN1,TRIP13,CHRNA1,CDC45,BLM,SALL1,GPC3,BRCA1,PGAP1,DHFR,BUB1,BUB1B,ASPM,KIF14,PLAG1,FGF8,ECEL1,DNA2,FOXC1,KIF11,DNMT3A,COL2A1,RAD51,DPP6,TCF3,COL13A1,NRTN,RNASEH2A,NSD2,IARS1,WT1,ITGA8,FANCL,CHD7,STIL,SIX1,GMNN,EDN3,DNAAF2,NBAS,HMGA2,FANCI,ASNS,DLL3,AUTS2,LRP4,PAX2,PRKDC,CDC6,FZD2,PLK4,KDM1A,PCNA,HELLS
Human Phenotype	HP:0010938	Abnormality of the external nose			6.476e-05	0.204	0.002428	0.02096	34	695	MYCN,SOX11,BRIP1,CENPE,ZNF423,DLK1,EYA1,BCOR,CHN1,TRIP13,CHRNA1,NEK2,GPC3,BUB1,BUB1B,KIF14,ECEL1,DNA2,FOXC1,KIF11,COL2A1,RAD51,RNASEH2A,NSD2,ITGA8,FANCL,GMNN,EDN3,FANCI,DLL3,AUTS2,FZD2,PLK4,KDM1A
Human Phenotype	HP:0008364	Abnormality of the calcaneus			6.792e-05	0.2139	0.002517	0.02173	6	29	EZH2,HOXD10,PLAG1,ECEL1,COL2A1,HMGA2
Human Phenotype	HP:0000606	Abnormality of the periorbital region			6.927e-05	0.2182	0.002537	0.0219	44	1013	MYCN,SOX11,BRIP1,CENPE,ORC6,ZNF423,DLK1,BCOR,EZH2,CHN1,TRIP13,CHRNA1,CDC45,SALL1,GPC3,BUB1,BUB1B,ASPM,ECEL1,FOXC1,KIF11,DNMT3A,RAD51,DPP6,TCF3,RNASEH2A,NSD2,WT1,ITGA8,FANCL,CHD7,STIL,GMNN,EDN3,NBAS,HMGA2,FANCI,AUTS2,LRP4,PAX2,SNRPE,PLK4,KDM1A,HELLS
Human Phenotype	HP:0002589	Gastrointestinal atresia			7.761e-05	0.2445	0.00275	0.02374	9	73	MYCN,TRIP13,SALL1,BUB1,BUB1B,NRTN,FANCL,CHD7,EDN3
Human Phenotype	HP:0005266	Intestinal polyp			7.761e-05	0.2445	0.00275	0.02374	9	73	MYCN,TRIP13,BUB1,BUB1B,NRTN,MSH2,EDN3,MSH6,HMGA2
Human Phenotype	HP:0008771	Aplasia/Hypoplasia of the ear			7.791e-05	0.2454	0.00275	0.02374	12	128	ORC6,DLK1,EYA1,CDC45,HOXA2,SALL1,NSD2,FANCL,CHD7,SIX1,GMNN,CDC6
Human Phenotype	HP:0002143	Abnormality of the spinal cord			7.858e-05	0.2475	0.00275	0.02374	26	469	MYCN,SOX11,BRIP1,ZNF423,ETV1,ETV4,EZH2,CHN1,MEOX1,GPC3,BRCA1,SYT1,NME1,DNA2,COL2A1,RAD51,NSD2,WT1,FANCL,STIL,HMGA2,LMNB1,FANCI,DLL3,KDM1A,MYB
Human Phenotype	HP:0000142	Abnormal vagina morphology			8.119e-05	0.2558	0.002811	0.02426	14	170	BCOR,EZH2,TRIP13,SALL1,BUB1,BUB1B,KIF14,PLAG1,NRTN,WT1,ITGA8,EDN3,MSH6,HMGA2
Human Phenotype	HP:0100650	Vaginal neoplasm			8.316e-05	0.2619	0.002832	0.02444	6	30	EZH2,TRIP13,BUB1,BUB1B,MSH6,HMGA2
Human Phenotype	HP:0001537	Umbilical hernia			8.36e-05	0.2633	0.002832	0.02444	16	215	BRIP1,BCOR,EZH2,SALL1,GPC3,SYT1,DNMT3A,COL2A1,RAD51,FANCL,CHD7,GMNN,HMGA2,FANCI,DLL3,HELLS
Human Phenotype	HP:0100278	Periauricular skin tag			8.779e-05	0.2766	0.002911	0.02513	8	58	EYA1,BCOR,CHN1,SALL1,GPC3,NSD2,CHD7,SIX1
Human Phenotype	HP:0000384	Preauricular skin tag			8.779e-05	0.2766	0.002911	0.02513	8	58	EYA1,BCOR,CHN1,SALL1,GPC3,NSD2,CHD7,SIX1
Human Phenotype	HP:0010787	Genital neoplasm			9.156e-05	0.2884	0.003004	0.02593	17	240	BRIP1,EZH2,TRIP13,AURKA,GPC3,BRCA1,BUB1,BUB1B,PLAG1,RAD51,WT1,FANCL,MSH2,ODC1,MSH6,HMGA2,FANCI
Human Phenotype	HP:0006716	Hereditary nonpolyposis colorectal carcinoma			9.758e-05	0.3074	0.003169	0.02735	7	44	BRIP1,AURKA,BUB1,BUB1B,MSH2,ODC1,MSH6
Human Phenotype	HP:0009726	Renal neoplasm			9.867e-05	0.3108	0.003172	0.02738	16	218	BRIP1,ETV1,ETV4,EZH2,TRIP13,AURKA,GPC3,BRCA1,BUB1,BUB1B,PLAG1,WT1,MSH2,ODC1,MSH6,HMGA2
Human Phenotype	HP:0002488	Acute leukemia			0.0001042	0.3282	0.003262	0.02816	16	219	BRIP1,ETV1,ETV4,EZH2,TRIP13,BLM,GPC3,BUB1,BUB1B,DNMT3A,RAD51,WT1,FANCL,STIL,FANCI,MYB
Human Phenotype	HP:0001551	Abnormal umbilicus morphology			0.0001042	0.3282	0.003262	0.02816	16	219	BRIP1,BCOR,EZH2,SALL1,GPC3,SYT1,DNMT3A,COL2A1,RAD51,FANCL,CHD7,GMNN,HMGA2,FANCI,DLL3,HELLS
Human Phenotype	HP:0002896	Neoplasm of the liver			0.0001046	0.3294	0.003262	0.02816	14	174	BRIP1,ETV1,ETV4,EZH2,GPC3,BRCA1,PLAG1,RAD51,WT1,FANCL,MSH2,MSH6,HMGA2,FANCI
Human Phenotype	HP:0010784	Uterine neoplasm			0.0001101	0.3469	0.003401	0.02936	10	94	BRIP1,EZH2,AURKA,BRCA1,BUB1,BUB1B,MSH2,ODC1,MSH6,HMGA2
Human Phenotype	HP:0011267	Microtia, third degree			0.0001117	0.352	0.003417	0.0295	4	11	ORC6,CDC45,GMNN,CDC6
Human Phenotype	HP:0002667	Nephroblastoma			0.0001211	0.3814	0.003633	0.03136	11	114	ETV1,ETV4,EZH2,TRIP13,GPC3,BUB1,BUB1B,PLAG1,WT1,MSH6,HMGA2
Human Phenotype	HP:0100258	Preaxial polydactyly			0.0001211	0.3814	0.003633	0.03136	11	114	BRIP1,BCOR,CHN1,CDC45,SALL1,BRCA1,RAD51,NSD2,WT1,FANCL,FANCI
Human Phenotype	HP:0001462	Abnormality of external features of the abdomen			0.0001225	0.3858	0.003639	0.03142	16	222	BRIP1,BCOR,EZH2,SALL1,GPC3,SYT1,DNMT3A,COL2A1,RAD51,FANCL,CHD7,GMNN,HMGA2,FANCI,DLL3,HELLS
Human Phenotype	HP:0001373	Joint dislocation			0.0001293	0.4074	0.003808	0.03287	19	296	SOX11,BRIP1,ORC6,EYA1,CHRNA1,STAT4,CDC45,HOXA11,GPC3,ECEL1,COL2A1,RAD51,NSD2,FANCL,SIX1,GMNN,FANCI,CDC6,FZD2
Human Phenotype	HP:0005918	Abnormal finger phalanx morphology			0.0001361	0.4288	0.00397	0.03427	27	513	MYCN,SOX11,BRIP1,ORC6,ZNF423,BCOR,EZH2,CHN1,CDC45,BLM,SALL1,GPC3,BRCA1,PLAG1,COL2A1,RAD51,DPP6,NSD2,FANCL,CHD7,GMNN,HMGA2,FANCI,DLL3,LRP4,CDC6,FZD2
Human Phenotype	HP:0011794	Embryonal renal neoplasm			0.0001417	0.4465	0.004093	0.03533	11	116	ETV1,ETV4,EZH2,TRIP13,GPC3,BUB1,BUB1B,PLAG1,WT1,MSH6,HMGA2
Human Phenotype	HP:0005288	Abnormality of the nares			0.0001429	0.4502	0.004093	0.03533	25	458	MYCN,SOX11,BRIP1,ZNF423,DLK1,EYA1,BCOR,CHN1,TRIP13,NEK2,GPC3,BUB1,BUB1B,KIF14,ECEL1,KIF11,COL2A1,RAD51,FANCL,GMNN,HMGA2,FANCI,DLL3,PLK4,KDM1A
Human Phenotype	HP:0000028	Cryptorchidism			0.0001459	0.4596	0.00414	0.03574	29	573	SOX11,BRIP1,ORC6,BCOR,EZH2,TRIP13,CDC45,BLM,SALL1,GPC3,BRCA1,BUB1,BUB1B,PLAG1,FGF8,RAD51,NRTN,NSD2,WT1,FANCL,CHD7,GMNN,EDN3,HMGA2,FANCI,DLL3,CDC6,FZD2,KDM1A
Human Phenotype	HP:0001034	Hypermelanotic macule			0.0001496	0.4714	0.004196	0.03622	13	158	BRIP1,TRIP13,BLM,BRCA1,BUB1,BUB1B,PLAG1,RAD51,FANCL,MSH2,MSH6,HMGA2,FANCI
Human Phenotype	HP:0006849	Hypodysplasia of the corpus callosum			0.0001519	0.4784	0.004196	0.03622	3	5	TRIP13,BUB1,BUB1B
Human Phenotype	HP:0100274	Gustatory lacrimation			0.0001519	0.4784	0.004196	0.03622	3	5	EYA1,CHN1,SIX1
Human Phenotype	HP:0009239	Aplasia/Hypoplasia of the distal phalanx of the 5th finger			0.0001644	0.5177	0.004502	0.03886	4	12	SOX11,PLAG1,COL2A1,HMGA2
Human Phenotype	HP:0003254	Abnormality of DNA repair			0.0001734	0.5462	0.004709	0.04065	6	34	BRIP1,BLM,BRCA1,RAD51,FANCL,FANCI
Human Phenotype	HP:0000402	Stenosis of the external auditory canal			0.0001771	0.558	0.004769	0.04117	5	22	EYA1,CHN1,NSD2,SIX1,GMNN
Human Phenotype	HP:0000492	Abnormal eyelid morphology			0.0001806	0.5689	0.004807	0.0415	39	889	MYCN,SOX11,BRIP1,CENPE,ORC6,DLK1,BCOR,EZH2,CHN1,TRIP13,CHRNA1,SALL1,GPC3,BUB1,BUB1B,ASPM,FOXC1,KIF11,DNMT3A,RAD51,DPP6,TCF3,RNASEH2A,NSD2,WT1,ITGA8,FANCL,CHD7,STIL,GMNN,EDN3,NBAS,FANCI,AUTS2,LRP4,SNRPE,PLK4,KDM1A,HELLS
Human Phenotype	HP:0200006	Slanting of the palpebral fissure			0.0001816	0.572	0.004807	0.0415	24	437	MYCN,BRIP1,CENPE,ORC6,EZH2,TRIP13,GPC3,BUB1,BUB1B,ASPM,KIF11,RAD51,DPP6,NSD2,FANCL,CHD7,STIL,GMNN,EDN3,FANCI,AUTS2,LRP4,PLK4,KDM1A
Human Phenotype	HP:0000284	Abnormality of the ocular region			0.0001858	0.5853	0.004877	0.0421	53	1364	MYCN,SOX11,BRIP1,CENPE,ORC6,ZNF423,ETV1,ETV4,HMGB3,DLK1,BCOR,EZH2,CHN1,TRIP13,CHRNA1,CDC45,NEK2,SALL1,GPC3,BRCA1,BUB1,BUB1B,ASPM,FGF8,ECEL1,FOXC1,KIF11,DNMT3A,COL2A1,RAD51,DPP6,TCF3,RNASEH2A,NSD2,WT1,ITGA8,FANCL,CHD7,STIL,GMNN,EDN3,NBAS,HMGA2,FANCI,AUTS2,LRP4,PAX2,PRKDC,FZD2,SNRPE,PLK4,KDM1A,HELLS
Human Phenotype	HP:0005933	Kidney cancer			0.0001911	0.602	0.004975	0.04295	15	207	BRIP1,ETV1,ETV4,EZH2,TRIP13,AURKA,GPC3,BRCA1,BUB1,BUB1B,PLAG1,WT1,ODC1,MSH6,HMGA2
Human Phenotype	HP:0000036	Abnormality of the penis			0.0001943	0.612	0.005016	0.0433	30	612	BRIP1,ORC6,BCOR,EZH2,TRIP13,CDC45,NEK2,SALL1,GPC3,BRCA1,BUB1,BUB1B,SYT1,PLAG1,FGF8,FOXC1,RAD51,NSD2,WT1,FANCL,CHD7,GMNN,HMGA2,LMNB1,FANCI,DLL3,PRKDC,CDC6,FZD2,KDM1A
Human Phenotype	HP:0001274	Agenesis of corpus callosum			0.0002156	0.6792	0.005522	0.04767	16	233	SOX11,CENPE,TUBB2B,TRIP13,SALL1,GPC3,BUB1,BUB1B,ASPM,KIF14,NRTN,NSD2,MSH2,STIL,EDN3,MSH6
Human Phenotype	HP:0000089	Renal hypoplasia			0.0002188	0.6893	0.005559	0.04799	10	102	SALL1,GPC3,KIF14,WT1,FANCL,CHD7,CEP55,HMGA2,LRP4,PAX2
Human Phenotype	HP:0012745	Short palpebral fissure			0.000233	0.7341	0.005873	0.0507	9	84	MYCN,SOX11,BRIP1,DLK1,CHN1,RAD51,FANCL,FANCI,AUTS2
Human Phenotype	HP:0003220	Abnormality of chromosome stability			0.0002547	0.8021	0.006366	0.05496	7	51	BRIP1,BLM,BRCA1,RAD51,FANCL,FANCI,HELLS
Human Phenotype	HP:0200008	Intestinal polyposis			0.0002742	0.8637	0.006723	0.05804	8	68	MYCN,TRIP13,BUB1,BUB1B,NRTN,MSH2,EDN3,MSH6
Human Phenotype	HP:0003002	Breast carcinoma			0.0002758	0.8687	0.006723	0.05804	15	214	BRIP1,ETV1,BARD1,ETV4,HMMR,EZH2,GPC3,BRCA1,RAD51,WT1,FANCL,MSH2,MSH6,HMGA2,FANCI
Human Phenotype	HP:0002818	Abnormality of the radius			0.0002768	0.8718	0.006723	0.05804	13	168	BRIP1,BCOR,CHN1,HOXA11,BRCA1,COL2A1,RAD51,NSD2,FANCL,CHD7,FANCI,LRP4,FZD2
Human Phenotype	HP:0006501	Aplasia/Hypoplasia of the radius			0.000279	0.8789	0.006723	0.05804	9	86	BRIP1,CHN1,BRCA1,COL2A1,RAD51,FANCL,CHD7,FANCI,LRP4
Human Phenotype	HP:0000048	Bifid scrotum			0.0002817	0.8875	0.006723	0.05804	6	37	TRIP13,SALL1,BUB1,BUB1B,CHD7,FZD2
Human Phenotype	HP:0002245	Meckel diverticulum			0.0002817	0.8875	0.006723	0.05804	6	37	BRIP1,GPC3,RAD51,FANCL,HMGA2,FANCI
Human Phenotype	HP:0011297	Abnormal digit morphology			0.0002899	0.9131	0.006805	0.05875	45	1108	MYCN,SOX11,BRIP1,CENPE,ORC6,ZNF423,DLK1,BCOR,EZH2,CHN1,TRIP13,CHRNA1,CDC45,BLM,HOXA11,NEK2,SALL1,GPC3,BRCA1,BUB1,BUB1B,PLAG1,ECEL1,COL2A1,RAD51,DPP6,NRTN,NSD2,WT1,FANCL,CHD7,LMNB2,GMNN,EDN3,CEP55,NBAS,HMGA2,FANCI,DLL3,LRP4,PRKDC,CDC6,FZD2,PLK4,KDM1A
Human Phenotype	HP:0010623	Tumours of the breast			0.0002902	0.9141	0.006805	0.05875	15	215	BRIP1,ETV1,BARD1,ETV4,HMMR,EZH2,GPC3,BRCA1,RAD51,WT1,FANCL,MSH2,MSH6,HMGA2,FANCI
Human Phenotype	HP:0004227	Short distal phalanx of the 5th finger			0.0002981	0.9391	0.006805	0.05875	3	6	PLAG1,COL2A1,HMGA2
Human Phenotype	HP:0045060	Aplasia/hypoplasia involving bones of the extremities			0.0002997	0.9441	0.006805	0.05875	32	688	MYCN,SOX11,BRIP1,CENPE,ORC6,BCOR,EZH2,CHN1,CHRNA1,CDC45,NEK2,SALL1,GPC3,BRCA1,PLAG1,FGF8,COL2A1,RAD51,NSD2,WT1,FANCL,CHD7,LMNB2,STIL,GMNN,HMGA2,FANCI,LRP4,CDC6,FZD2,KDM1A,MYB
Human Phenotype	HP:0009825	Aplasia involving bones of the extremities			0.0002997	0.9441	0.006805	0.05875	32	688	MYCN,SOX11,BRIP1,CENPE,ORC6,BCOR,EZH2,CHN1,CHRNA1,CDC45,NEK2,SALL1,GPC3,BRCA1,PLAG1,FGF8,COL2A1,RAD51,NSD2,WT1,FANCL,CHD7,LMNB2,STIL,GMNN,HMGA2,FANCI,LRP4,CDC6,FZD2,KDM1A,MYB
Human Phenotype	HP:0001156	Brachydactyly			0.0003003	0.9459	0.006805	0.05875	25	480	MYCN,SOX11,BRIP1,BCOR,EZH2,CHN1,CHRNA1,SALL1,GPC3,BRCA1,PLAG1,COL2A1,RAD51,DPP6,NSD2,FANCL,CHD7,LMNB2,GMNN,NBAS,HMGA2,FANCI,LRP4,FZD2,KDM1A
Human Phenotype	HP:0011927	Short digit			0.0003003	0.9459	0.006805	0.05875	25	480	MYCN,SOX11,BRIP1,BCOR,EZH2,CHN1,CHRNA1,SALL1,GPC3,BRCA1,PLAG1,COL2A1,RAD51,DPP6,NSD2,FANCL,CHD7,LMNB2,GMNN,NBAS,HMGA2,FANCI,LRP4,FZD2,KDM1A
Human Phenotype	HP:0000358	Posteriorly rotated ears			0.0003042	0.9582	0.006844	0.05908	19	316	MYCN,SOX11,ORC6,ZNF423,BCOR,EZH2,TRIP13,CDC45,GPC3,BUB1,BUB1B,PLAG1,NSD2,CHD7,GMNN,EDN3,HMGA2,DLL3,CDC6
Human Phenotype	HP:0001159	Syndactyly			0.0003152	0.9929	0.006942	0.05993	18	291	MYCN,BRIP1,BCOR,EZH2,CDC45,BLM,HOXA11,SALL1,GPC3,PLAG1,RAD51,FANCL,CEP55,NBAS,HMGA2,FANCI,DLL3,LRP4
Human Phenotype	HP:0009815	Aplasia/hypoplasia of the extremities			0.0003166	0.9972	0.006942	0.05993	33	721	MYCN,SOX11,BRIP1,CENPE,ORC6,BCOR,EZH2,CHN1,CHRNA1,CDC45,NEK2,SALL1,GPC3,BRCA1,PLAG1,FGF8,COL2A1,RAD51,NSD2,WT1,FANCL,CHD7,LMNB2,STIL,GMNN,NBAS,HMGA2,FANCI,LRP4,CDC6,FZD2,KDM1A,MYB
Human Phenotype	HP:0100834	Neoplasm of the large intestine			0.0003172	0.9992	0.006942	0.05993	11	127	MYCN,BRIP1,EZH2,TRIP13,AURKA,BRCA1,BUB1,BUB1B,MSH2,ODC1,MSH6
Human Phenotype	HP:0004225	Abnormality of the distal phalanx of the 5th finger			0.0003196	1	0.006942	0.05993	4	14	SOX11,PLAG1,COL2A1,HMGA2
Human Phenotype	HP:0009939	Mandibular aplasia			0.0003196	1	0.006942	0.05993	4	14	ORC6,CDC45,GMNN,CDC6
Human Phenotype	HP:0100867	Duodenal stenosis			0.0003363	1	0.007158	0.06179	5	25	BRIP1,CDC45,RAD51,FANCL,FANCI
Human Phenotype	HP:0012848	Small intestinal stenosis			0.0003363	1	0.007158	0.06179	5	25	BRIP1,CDC45,RAD51,FANCL,FANCI
Human Phenotype	HP:0000410	Mixed hearing impairment			0.0003363	1	0.007158	0.06179	5	25	EYA1,CHN1,HOXA2,CHD7,SIX1
Human Phenotype	HP:0001255	Psychomotor developmental delay			0.0003507	1	0.007405	0.06392	63	1762	MYCN,SOX11,BRIP1,CENPE,ORC6,ATP8A2,ZNF423,KIF4A,HMGB3,TUBB2B,EYA1,BCOR,EZH2,CHN1,TRIP13,CHRNA1,STAT4,CDC45,HOXA1,BLM,NEK2,SALL1,GPC3,BRCA1,NRXN1,PGAP1,BUB1,BUB1B,ASPM,PLAG1,FGF8,DNA2,KIF11,DNMT3A,COL2A1,RAD51,DPP6,VRK1,COL13A1,NRTN,RNASEH2A,NSD2,SOBP,IARS1,TUSC3,WT1,FANCL,CHD7,LMNB2,STIL,GMNN,EDN3,ZNF711,HMGA2,LMNB1,FANCI,DLL3,AUTS2,PAX2,CDC6,PLK4,KDM1A,HELLS
Human Phenotype	HP:0001273	Abnormal corpus callosum morphology			0.0003526	1	0.007405	0.06392	25	485	SOX11,CENPE,ATP8A2,ZNF423,TUBB2B,BCOR,TRIP13,SALL1,GPC3,PGAP1,BUB1,BUB1B,ASPM,KIF14,FOXC1,NRTN,NSD2,MSH2,STIL,EDN3,MSH6,LMNB1,ASNS,PRKDC,KDM1A
Human Phenotype	HP:0005927	Aplasia/hypoplasia involving bones of the hand			0.0003643	1	0.007572	0.06536	21	374	SOX11,BRIP1,CENPE,BCOR,CHN1,CHRNA1,GPC3,BRCA1,PLAG1,COL2A1,RAD51,NSD2,FANCL,CHD7,LMNB2,GMNN,HMGA2,FANCI,LRP4,FZD2,KDM1A
Human Phenotype	HP:0006989	Dysplastic corpus callosum			0.0003654	1	0.007572	0.06536	16	244	SOX11,CENPE,TUBB2B,TRIP13,SALL1,GPC3,BUB1,BUB1B,ASPM,KIF14,NRTN,NSD2,MSH2,STIL,EDN3,MSH6
Human Phenotype	HP:0002885	Medulloblastoma			0.0003705	1	0.007627	0.06584	8	71	MYCN,ETV1,ETV4,EZH2,GPC3,WT1,MSH2,MSH6
Human Phenotype	HP:0001155	Abnormality of the hand			0.0003746	1	0.007663	0.06615	44	1086	MYCN,SOX11,BRIP1,CENPE,ORC6,ZNF423,DLK1,BCOR,EZH2,CHN1,TRIP13,CHRNA1,CDC45,BLM,HOXA11,SALL1,GPC3,BRCA1,BUB1,BUB1B,PLAG1,ECEL1,COL2A1,RAD51,DPP6,NRTN,NSD2,FANCL,CHD7,LMNB2,GMNN,EDN3,NBAS,HMGA2,FANCI,ASNS,DLL3,AUTS2,LRP4,PRKDC,CDC6,FZD2,PLK4,KDM1A
Human Phenotype	HP:0030448	Soft tissue sarcoma			0.0003782	1	0.007685	0.06634	20	348	BRIP1,ETV1,BARD1,ETV4,HMMR,EZH2,TRIP13,AURKA,GPC3,BRCA1,BUB1,BUB1B,RAD51,WT1,FANCL,MSH2,ODC1,MSH6,HMGA2,FANCI
Human Phenotype	HP:0007400	Irregular hyperpigmentation			0.0003878	1	0.007831	0.0676	14	197	BRIP1,CHN1,TRIP13,BLM,BRCA1,BUB1,BUB1B,PLAG1,RAD51,FANCL,MSH2,MSH6,HMGA2,FANCI
Human Phenotype	HP:0100013	Neoplasm of the breast			0.0003911	1	0.007847	0.06774	15	221	BRIP1,ETV1,BARD1,ETV4,HMMR,EZH2,GPC3,BRCA1,RAD51,WT1,FANCL,MSH2,MSH6,HMGA2,FANCI
Human Phenotype	HP:0000163	Abnormal oral cavity morphology			0.0003983	1	0.007923	0.06839	60	1657	MYCN,SOX11,BRIP1,CENPE,ORC6,TUBB2B,DLK1,EYA1,BCOR,EZH2,CHN1,TRIP13,CHRNA1,STAT4,CDC45,MEOX1,HOXA2,BLM,GPC3,NRXN1,PGAP1,BUB1,BUB1B,KIF14,PLAG1,FGF8,ECEL1,DNA2,FOXC1,KIF11,COL2A1,RAD51,DPP6,TCF3,SLC25A21,KIF23,COL13A1,NSD2,SOBP,WT1,ITGA8,FANCL,CHD7,MSH2,LMNB2,SIX1,GMNN,ARID3B,MSH6,HMGA2,FANCI,ASNS,DLL3,LRP4,PRKDC,CDC6,FZD2,PLK4,KDM1A,HELLS
Human Phenotype	HP:0007379	Neoplasm of the genitourinary tract			0.0004023	1	0.007923	0.06839	19	323	BRIP1,ETV1,ETV4,EZH2,TRIP13,AURKA,GPC3,BRCA1,BUB1,BUB1B,PLAG1,RAD51,WT1,FANCL,MSH2,ODC1,MSH6,HMGA2,FANCI
Human Phenotype	HP:0001631	Atrial septal defect			0.0004049	1	0.007923	0.06839	18	297	BRIP1,DLK1,BCOR,TRIP13,CDC45,SALL1,GPC3,BUB1,BUB1B,FOXC1,KIF11,DNMT3A,RAD51,NSD2,WT1,FANCL,CHD7,FANCI
Human Phenotype	HP:0001630	Abnormality of the atrial septum			0.0004049	1	0.007923	0.06839	18	297	BRIP1,DLK1,BCOR,TRIP13,CDC45,SALL1,GPC3,BUB1,BUB1B,FOXC1,KIF11,DNMT3A,RAD51,NSD2,WT1,FANCL,CHD7,FANCI
Human Phenotype	HP:0010936	Abnormality of the lower urinary tract			0.0004121	1	0.008013	0.06917	32	700	BRIP1,ORC6,EYA1,BCOR,TRIP13,CDC45,SALL1,GPC3,BRCA1,BUB1,BUB1B,ASPM,SYT1,PLAG1,FOXC1,RAD51,NRTN,NSD2,WT1,FANCL,CHD7,STIL,SIX1,GMNN,EDN3,HMGA2,LMNB1,FANCI,DLL3,PAX2,CDC6,FZD2
Human Phenotype	HP:0011994	Abnormal atrial septum morphology			0.0004219	1	0.008153	0.07038	18	298	BRIP1,DLK1,BCOR,TRIP13,CDC45,SALL1,GPC3,BUB1,BUB1B,FOXC1,KIF11,DNMT3A,RAD51,NSD2,WT1,FANCL,CHD7,FANCI
Human Phenotype	HP:0000159	Abnormal lip morphology			0.0004265	1	0.008191	0.07071	34	764	MYCN,SOX11,ORC6,DLK1,EYA1,BCOR,EZH2,CHN1,TRIP13,CDC45,MEOX1,GPC3,BUB1,BUB1B,ASPM,PLAG1,FOXC1,KIF11,COL2A1,NSD2,WT1,ITGA8,CHD7,STIL,SIX1,GMNN,NBAS,HMGA2,DLL3,AUTS2,PRKDC,CDC6,FZD2,KDM1A
Human Phenotype	HP:0000066	Labial hypoplasia			0.0004373	1	0.008298	0.07163	6	40	ORC6,CDC45,ECEL1,CHD7,GMNN,CDC6
Human Phenotype	HP:0011018	Abnormality of the cell cycle			0.0004373	1	0.008298	0.07163	6	40	BRIP1,BLM,BRCA1,RAD51,FANCL,FANCI
Human Phenotype	HP:0000086	Ectopic kidney			0.0004488	1	0.008464	0.07307	8	73	SOX11,CHN1,SALL1,GPC3,BRCA1,DNA2,WT1,HMGA2
Human Phenotype	HP:0010786	Urinary tract neoplasm			0.0004589	1	0.008565	0.07394	16	249	BRIP1,ETV1,ETV4,EZH2,TRIP13,AURKA,GPC3,BRCA1,BUB1,BUB1B,PLAG1,WT1,MSH2,ODC1,MSH6,HMGA2
Human Phenotype	HP:0007565	Multiple cafe-au-lait spots			0.0004595	1	0.008565	0.07394	7	56	BRIP1,TRIP13,BUB1,BUB1B,RAD51,FANCL,FANCI
Human Phenotype	HP:0001905	Congenital thrombocytopenia			0.0004908	1	0.009075	0.07834	5	27	BRIP1,HOXA11,RAD51,FANCL,FANCI
Human Phenotype	HP:0010609	Skin tags			0.0004927	1	0.009075	0.07834	8	74	EYA1,BCOR,CHN1,SALL1,GPC3,NSD2,CHD7,SIX1
Human Phenotype	HP:0000489	Abnormality of globe location or size			0.0005095	1	0.009185	0.07929	39	933	BRIP1,ETV1,ETV4,HMGB3,BCOR,EZH2,CHN1,TRIP13,CHRNA1,CDC45,NEK2,SALL1,GPC3,BRCA1,BUB1,BUB1B,ASPM,FGF8,FOXC1,KIF11,COL2A1,RAD51,DPP6,TCF3,NSD2,WT1,ITGA8,FANCL,CHD7,NBAS,HMGA2,FANCI,AUTS2,LRP4,PAX2,PRKDC,FZD2,PLK4,HELLS
Human Phenotype	HP:0011821	Abnormality of facial skeleton			0.000511	1	0.009185	0.07929	42	1033	MYCN,BRIP1,CENPE,ORC6,DLK1,EYA1,EZH2,CHN1,TRIP13,CHRNA1,CDC45,BLM,GPC3,BUB1,BUB1B,KIF14,PLAG1,FGF8,ECEL1,DNA2,FOXC1,KIF11,COL2A1,RAD51,TCF3,COL13A1,NSD2,WT1,ITGA8,FANCL,CHD7,SIX1,GMNN,DNAAF2,HMGA2,FANCI,ASNS,LRP4,CDC6,FZD2,PLK4,HELLS
Human Phenotype	HP:0011094	Overbite			0.0005121	1	0.009185	0.07929	3	7	EYA1,DPP6,SIX1
Human Phenotype	HP:0200024	Premature chromatid separation			0.0005121	1	0.009185	0.07929	3	7	TRIP13,BUB1,BUB1B
Human Phenotype	HP:0012733	Macule			0.0005141	1	0.009185	0.07929	13	179	BRIP1,TRIP13,BLM,BRCA1,BUB1,BUB1B,PLAG1,RAD51,FANCL,MSH2,MSH6,HMGA2,FANCI
Human Phenotype	HP:0005120	Abnormal cardiac atrium morphology			0.0005161	1	0.009185	0.07929	18	303	BRIP1,DLK1,BCOR,TRIP13,CDC45,SALL1,GPC3,BUB1,BUB1B,FOXC1,KIF11,DNMT3A,RAD51,NSD2,WT1,FANCL,CHD7,FANCI
Human Phenotype	HP:0200031	macules			0.0005458	1	0.009659	0.08338	15	228	BRIP1,CHN1,TRIP13,BLM,BRCA1,BUB1,BUB1B,PLAG1,RAD51,FANCL,MSH2,EDN3,MSH6,HMGA2,FANCI
Human Phenotype	HP:0001161	Hand polydactyly			0.0005535	1	0.00974	0.08408	14	204	BRIP1,ZNF423,BCOR,CHN1,BLM,SALL1,GPC3,BRCA1,COL2A1,RAD51,NSD2,FANCL,CHD7,FANCI
Human Phenotype	HP:0100783	Breast aplasia			0.0005587	1	0.009777	0.0844	4	16	ORC6,CDC45,GMNN,CDC6
Human Phenotype	HP:0002672	Gastrointestinal carcinoma			0.0005714	1	0.009873	0.08523	7	58	BRIP1,AURKA,BUB1,BUB1B,MSH2,ODC1,MSH6
Human Phenotype	HP:0006749	Malignant gastrointestinal tract tumors			0.0005714	1	0.009873	0.08523	7	58	BRIP1,AURKA,BUB1,BUB1B,MSH2,ODC1,MSH6
Human Phenotype	HP:0031093	Abnormal breast morphology			0.0005736	1	0.009873	0.08523	23	443	BRIP1,ORC6,ETV1,BARD1,ETV4,HMMR,EZH2,CDC45,GPC3,BRCA1,FGF8,RAD51,NSD2,WT1,FANCL,CHD7,MSH2,GMNN,MSH6,HMGA2,FANCI,CDC6,KDM1A
Human Phenotype	HP:0000059	Hypoplastic labia majora			0.0005855	1	0.009977	0.08612	5	28	ORC6,CDC45,ECEL1,GMNN,CDC6
Human Phenotype	HP:0000372	Abnormality of the auditory canal			0.000591	1	0.009977	0.08612	8	76	ORC6,EYA1,CHN1,CDC45,NSD2,SIX1,GMNN,CDC6
Human Phenotype	HP:0000463	Anteverted nares			0.0005923	1	0.009977	0.08612	23	444	MYCN,BRIP1,ZNF423,DLK1,EYA1,BCOR,CHN1,TRIP13,NEK2,GPC3,BUB1,BUB1B,KIF14,ECEL1,KIF11,COL2A1,RAD51,FANCL,GMNN,FANCI,DLL3,PLK4,KDM1A
Human Phenotype	HP:0000427	Upturned nose			0.0005923	1	0.009977	0.08612	23	444	MYCN,BRIP1,ZNF423,DLK1,EYA1,BCOR,CHN1,TRIP13,NEK2,GPC3,BUB1,BUB1B,KIF14,ECEL1,KIF11,COL2A1,RAD51,FANCL,GMNN,FANCI,DLL3,PLK4,KDM1A
Human Phenotype	HP:0001249	Intellectual disability			0.0006139	1	0.01029	0.08879	59	1644	MYCN,SOX11,BRIP1,CENPE,ORC6,ATP8A2,ZNF423,KIF4A,HMGB3,TUBB2B,EYA1,BCOR,EZH2,CHN1,TRIP13,STAT4,CDC45,BLM,NEK2,SALL1,GPC3,BRCA1,NRXN1,PGAP1,BUB1,BUB1B,ASPM,PLAG1,FGF8,DNA2,KIF11,DNMT3A,COL2A1,RAD51,DPP6,VRK1,NRTN,RNASEH2A,NSD2,SOBP,IARS1,TUSC3,WT1,FANCL,CHD7,LMNB2,STIL,GMNN,EDN3,ZNF711,HMGA2,LMNB1,FANCI,DLL3,AUTS2,PAX2,CDC6,PLK4,HELLS
Human Phenotype	HP:0011119	Abnormality of the nasal dorsum			0.0006354	1	0.01058	0.09133	13	183	SOX11,CENPE,TRIP13,CHRNA1,BUB1,BUB1B,DNA2,FOXC1,RNASEH2A,NSD2,ITGA8,GMNN,PLK4
Human Phenotype	HP:0004808	Acute myeloid leukemia			0.0006381	1	0.01058	0.09133	12	160	BRIP1,ETV1,ETV4,EZH2,GPC3,DNMT3A,RAD51,WT1,FANCL,STIL,FANCI,MYB
Human Phenotype	HP:0000769	Abnormality of the breast			0.0006515	1	0.01071	0.09246	23	447	BRIP1,ORC6,ETV1,BARD1,ETV4,HMMR,EZH2,CDC45,GPC3,BRCA1,FGF8,RAD51,NSD2,WT1,FANCL,CHD7,MSH2,GMNN,MSH6,HMGA2,FANCI,CDC6,KDM1A
Human Phenotype	HP:0002025	Anal stenosis			0.0006529	1	0.01071	0.09246	6	43	CDC45,SALL1,FOXC1,NRTN,CHD7,EDN3
Human Phenotype	HP:0004859	Amegakaryocytic thrombocytopenia			0.0006933	1	0.01132	0.09769	5	29	BRIP1,HOXA11,RAD51,FANCL,FANCI
Human Phenotype	HP:0009997	Duplication of phalanx of hand			0.0007058	1	0.01146	0.09894	14	209	BRIP1,ZNF423,BCOR,CHN1,BLM,SALL1,GPC3,BRCA1,COL2A1,RAD51,NSD2,FANCL,CHD7,FANCI
Human Phenotype	HP:0000064	Hypoplastic labia minora			0.0007164	1	0.01151	0.09939	4	17	ORC6,CDC45,GMNN,CDC6
Human Phenotype	HP:0006660	Aplastic clavicle			0.0007164	1	0.01151	0.09939	4	17	ORC6,CDC45,GMNN,CDC6
Human Phenotype	HP:0004275	Duplication of hand bones			0.0007402	1	0.01172	0.1012	14	210	BRIP1,ZNF423,BCOR,CHN1,BLM,SALL1,GPC3,BRCA1,COL2A1,RAD51,NSD2,FANCL,CHD7,FANCI
Human Phenotype	HP:0009142	Duplication of bones involving the upper extremities			0.0007402	1	0.01172	0.1012	14	210	BRIP1,ZNF423,BCOR,CHN1,BLM,SALL1,GPC3,BRCA1,COL2A1,RAD51,NSD2,FANCL,CHD7,FANCI
Human Phenotype	HP:0001177	Preaxial hand polydactyly			0.0007405	1	0.01172	0.1012	9	98	BRIP1,BCOR,CHN1,SALL1,BRCA1,RAD51,NSD2,FANCL,FANCI
Human Phenotype	HP:0000309	Abnormality of the midface			0.0007626	1	0.01201	0.1037	27	570	SOX11,BRIP1,ORC6,DLK1,EYA1,BCOR,CHN1,TRIP13,CDC45,BLM,SALL1,GPC3,BUB1,BUB1B,FGF8,FOXC1,KIF11,COL2A1,RAD51,NSD2,FANCL,CHD7,SIX1,GMNN,FANCI,CDC6,FZD2
Human Phenotype	HP:0009376	Aplasia/Hypoplasia of the phalanges of the 5th finger			0.0008154	1	0.01278	0.1103	5	30	MYCN,SOX11,PLAG1,COL2A1,HMGA2
Human Phenotype	HP:0000429	Abnormality of the nasal alae			0.0008235	1	0.01284	0.1109	25	513	MYCN,SOX11,BRIP1,ZNF423,DLK1,EYA1,BCOR,CHN1,TRIP13,NEK2,GPC3,BUB1,BUB1B,KIF14,ECEL1,KIF11,COL2A1,RAD51,FANCL,GMNN,EDN3,FANCI,DLL3,PLK4,KDM1A
Human Phenotype	HP:0002891	Uterine leiomyosarcoma			0.0008371	1	0.01299	0.1121	6	45	BRIP1,AURKA,BUB1,BUB1B,ODC1,HMGA2
Human Phenotype	HP:0005105	Abnormal nasal morphology			0.0008563	1	0.01322	0.1141	34	793	MYCN,SOX11,BRIP1,CENPE,ZNF423,DLK1,EYA1,BCOR,CHN1,TRIP13,CHRNA1,BLM,NEK2,GPC3,BUB1,BUB1B,KIF14,ECEL1,DNA2,KIF11,COL2A1,RAD51,RNASEH2A,NSD2,ITGA8,FANCL,GMNN,EDN3,HMGA2,FANCI,DLL3,FZD2,PLK4,KDM1A
Human Phenotype	HP:0002650	Scoliosis			0.000895	1	0.01375	0.1187	32	731	SOX11,BRIP1,CENPE,ZNF423,ETV1,ETV4,HMGB3,DLK1,BCOR,EZH2,CHRNA1,CDC45,MEOX1,GPC3,NRXN1,PLAG1,ECEL1,DNA2,DNMT3A,COL2A1,RAD51,DPP6,NSD2,WT1,FANCL,CHD7,LMNB2,HMGA2,FANCI,DLL3,AUTS2,PLK4
Human Phenotype	HP:0001760	Abnormality of the foot			0.000915	1	0.01399	0.1208	42	1061	MYCN,SOX11,BRIP1,CENPE,ORC6,ATP8A2,ZNF423,TUBB2B,DLK1,BCOR,EZH2,CHN1,CDC45,SALL1,GPC3,BRCA1,HOXD10,UCHL1,KIF14,PLAG1,FGF8,ECEL1,COL2A1,RAD51,DPP6,VRK1,COL13A1,NSD2,WT1,ITGA8,FANCL,CHD7,GMNN,CEP55,NBAS,HMGA2,FANCI,ASNS,DLL3,CDC6,PLK4,PCNA
Human Phenotype	HP:0000480	Retinal coloboma			0.0009473	1	0.01442	0.1244	7	63	ZNF423,BCOR,CHN1,SALL2,SALL1,CHD7,PAX2
Human Phenotype	HP:0040073	Abnormal forearm bone morphology			0.001062	1	0.01594	0.1376	9	103	BRIP1,CHN1,HOXA11,COL2A1,RAD51,FANCL,CHD7,FANCI,LRP4
Human Phenotype	HP:0008053	Aplasia/Hypoplasia of the iris			0.001062	1	0.01594	0.1376	9	103	BRIP1,CHN1,GPC3,FOXC1,RAD51,NSD2,WT1,FANCL,FANCI
Human Phenotype	HP:0008055	Aplasia/Hypoplasia affecting the uvea			0.001062	1	0.01594	0.1376	9	103	BRIP1,CHN1,GPC3,FOXC1,RAD51,NSD2,WT1,FANCL,FANCI
Human Phenotype	HP:0004213	Abnormal 5th finger phalanx morphology			0.001107	1	0.01644	0.1419	5	32	MYCN,SOX11,PLAG1,COL2A1,HMGA2
Human Phenotype	HP:0011133	Increased sensitivity to ionizing radiation			0.001107	1	0.01644	0.1419	5	32	BRIP1,BLM,RAD51,FANCL,FANCI
Human Phenotype	HP:0100833	Neoplasm of the small intestine			0.001122	1	0.01659	0.1432	4	19	EZH2,MSH2,MSH6,HMGA2
Human Phenotype	HP:0000274	Small face			0.001139	1	0.01676	0.1447	9	104	CENPE,EYA1,BCOR,BLM,PLAG1,CHD7,SIX1,HMGA2,PLK4
Human Phenotype	HP:0002898	Embryonal neoplasm			0.001157	1	0.01696	0.1464	16	271	ETV1,ETV4,EZH2,TRIP13,BLM,NEK2,GPC3,BRCA1,BUB1,BUB1B,PLAG1,WT1,STIL,MSH6,HMGA2,MYB
Human Phenotype	HP:0000927	Abnormality of skeletal maturation			0.001181	1	0.01719	0.1484	18	325	CENPE,ORC6,EYA1,EZH2,CDC45,BLM,GPC3,PLAG1,FGF8,COL2A1,DPP6,NSD2,CHD7,GMNN,NBAS,HMGA2,CDC6,PLK4
Human Phenotype	HP:0004712	Renal malrotation			0.001184	1	0.01719	0.1484	3	9	EYA1,SIX1,PAX2
Human Phenotype	HP:0007370	Aplasia/Hypoplasia of the corpus callosum			0.001196	1	0.01729	0.1492	23	467	SOX11,CENPE,ZNF423,TUBB2B,BCOR,TRIP13,SALL1,GPC3,PGAP1,BUB1,BUB1B,ASPM,KIF14,FOXC1,NRTN,NSD2,MSH2,STIL,EDN3,MSH6,ASNS,PRKDC,KDM1A
Human Phenotype	HP:0002566	Intestinal malrotation			0.001219	1	0.01746	0.1507	9	105	EYA1,BCOR,GPC3,SYT1,NRTN,NSD2,SIX1,EDN3,HMGA2
Human Phenotype	HP:0001562	Oligohydramnios			0.001219	1	0.01746	0.1507	9	105	BRIP1,TRIP13,BUB1,BUB1B,KIF14,RAD51,ITGA8,FANCL,FANCI
Human Phenotype	HP:0100887	Abnormality of globe size			0.001267	1	0.01806	0.1559	18	327	BRIP1,HMGB3,BCOR,CHN1,TRIP13,NEK2,SALL1,BRCA1,BUB1,BUB1B,KIF11,RAD51,WT1,FANCL,CHD7,FANCI,PAX2,PLK4
Human Phenotype	HP:0006101	Finger syndactyly			0.001275	1	0.01806	0.1559	12	173	BRIP1,BCOR,EZH2,BLM,HOXA11,SALL1,GPC3,RAD51,FANCL,FANCI,DLL3,LRP4
Human Phenotype	HP:0006498	Aplasia/Hypoplasia of the patella			0.001278	1	0.01806	0.1559	5	33	SOX11,ORC6,CDC45,GMNN,CDC6
Human Phenotype	HP:0005387	Combined immunodeficiency			0.001341	1	0.01885	0.1627	12	174	BRIP1,TRIP13,BRCA1,BUB1,BUB1B,RAD51,FANCL,CHD7,STIL,FANCI,PRKDC,MYB
Human Phenotype	HP:0005522	Pyridoxine-responsive sideroblastic anemia			0.001375	1	0.01917	0.1655	4	20	BRIP1,RAD51,FANCL,FANCI
Human Phenotype	HP:0006443	Patellar aplasia			0.001375	1	0.01917	0.1655	4	20	ORC6,CDC45,GMNN,CDC6
Human Phenotype	HP:0040072	Abnormality of forearm bone			0.001391	1	0.01924	0.1661	13	199	BRIP1,BCOR,CHN1,HOXA11,BRCA1,COL2A1,RAD51,NSD2,FANCL,CHD7,FANCI,LRP4,FZD2
Human Phenotype	HP:0000508	Ptosis			0.001398	1	0.01924	0.1661	25	532	MYCN,SOX11,BRIP1,ZNF423,HMGB3,BCOR,EZH2,CHN1,CHRNA1,FGF8,NME1,DNA2,KIF11,COL2A1,RAD51,COL13A1,RNASEH2A,NSD2,WT1,FANCL,CHD7,FANCI,AUTS2,LRP4,KDM1A
Human Phenotype	HP:0011792	Neoplasm by histology			0.001399	1	0.01924	0.1661	29	655	MYCN,BRIP1,ETV1,BARD1,ETV4,HMMR,EZH2,TRIP13,BLM,AURKA,NEK2,GPC3,BRCA1,BUB1,BUB1B,PLAG1,NME1,RAD51,NRTN,WT1,FANCL,MSH2,ODC1,STIL,EDN3,MSH6,HMGA2,FANCI,MYB
Human Phenotype	HP:0001780	Abnormality of toe			0.001441	1	0.01973	0.1703	28	625	MYCN,SOX11,BRIP1,CENPE,ORC6,ZNF423,DLK1,BCOR,EZH2,CDC45,SALL1,GPC3,PLAG1,COL2A1,RAD51,DPP6,NSD2,WT1,FANCL,CHD7,GMNN,CEP55,NBAS,HMGA2,FANCI,DLL3,CDC6,PLK4
Human Phenotype	HP:0012881	Abnormality of the labia majora			0.001469	1	0.01982	0.1711	5	34	ORC6,CDC45,ECEL1,GMNN,CDC6
Human Phenotype	HP:0001199	Triphalangeal thumb			0.001474	1	0.01982	0.1711	6	50	BRIP1,CHN1,SALL1,RAD51,FANCL,FANCI
Human Phenotype	HP:0009619	Accessory phalanx of the thumb			0.001474	1	0.01982	0.1711	6	50	BRIP1,CHN1,SALL1,RAD51,FANCL,FANCI
Human Phenotype	HP:0004820	Acute myelomonocytic leukemia			0.001474	1	0.01982	0.1711	6	50	BRIP1,RAD51,FANCL,STIL,FANCI,MYB
Human Phenotype	HP:0001909	Leukemia			0.001479	1	0.01982	0.1711	22	445	BRIP1,ETV1,ETV4,MCM4,EZH2,TRIP13,BLM,GPC3,BRCA1,BUB1,BUB1B,KIF11,DNMT3A,RAD51,WT1,FANCL,MSH2,STIL,MSH6,HMGA2,FANCI,MYB
Human Phenotype	HP:0003022	Hypoplasia of the ulna			0.001496	1	0.01984	0.1712	7	68	BRIP1,COL2A1,RAD51,FANCL,CHD7,FANCI,LRP4
Human Phenotype	HP:0040071	Abnormal morphology of ulna			0.001496	1	0.01984	0.1712	7	68	BRIP1,COL2A1,RAD51,FANCL,CHD7,FANCI,LRP4
Human Phenotype	HP:0000925	Abnormality of the vertebral column			0.001499	1	0.01984	0.1712	45	1190	MYCN,SOX11,BRIP1,CENPE,ZNF423,ETV1,ETV4,HMGB3,DLK1,BCOR,EZH2,CHN1,TRIP13,CHRNA1,CDC45,MEOX1,BLM,SALL1,GPC3,NRXN1,PGAP1,BUB1,BUB1B,SYT1,PLAG1,ECEL1,DNA2,DNMT3A,COL2A1,RAD51,DPP6,COL13A1,NSD2,WT1,ITGA8,FANCL,CHD7,LMNB2,NBAS,HMGA2,FANCI,DLL3,AUTS2,PLK4,KDM1A
Human Phenotype	HP:0011844	Abnormal appendicular skeleton morphology			0.001545	1	0.02033	0.1755	65	1926	MYCN,SOX11,BRIP1,CENPE,ORC6,ATP8A2,ZNF423,TUBB2B,DLK1,EYA1,BCOR,EZH2,CHN1,TRIP13,CHRNA1,STAT4,CDC45,MEOX1,BLM,HOXA11,NEK2,SALL1,GPC3,BRCA1,HOXD10,UCHL1,BUB1,BUB1B,KIF14,SYT1,PLAG1,FGF8,ECEL1,DNA2,COL2A1,RAD51,DPP6,VRK1,COL13A1,NRTN,NSD2,WT1,ITGA8,FANCL,CHD7,LMNB2,STIL,SIX1,GMNN,EDN3,CEP55,NBAS,HMGA2,FANCI,ASNS,DLL3,AUTS2,LRP4,PRKDC,CDC6,FZD2,PLK4,KDM1A,PCNA,MYB
Human Phenotype	HP:0010866	Abdominal wall defect			0.001555	1	0.02033	0.1755	20	389	BRIP1,DLK1,BCOR,EZH2,WT1-AS,SALL1,GPC3,SYT1,DNMT3A,COL2A1,RAD51,NRTN,FANCL,CHD7,GMNN,EDN3,HMGA2,FANCI,DLL3,HELLS
Human Phenotype	HP:0100656	Thoracoabdominal wall defect			0.001555	1	0.02033	0.1755	20	389	BRIP1,DLK1,BCOR,EZH2,WT1-AS,SALL1,GPC3,SYT1,DNMT3A,COL2A1,RAD51,NRTN,FANCL,CHD7,GMNN,EDN3,HMGA2,FANCI,DLL3,HELLS
Human Phenotype	HP:0002750	Delayed skeletal maturation			0.001574	1	0.02049	0.1768	16	279	CENPE,ORC6,EYA1,CDC45,BLM,PLAG1,FGF8,COL2A1,DPP6,NSD2,CHD7,GMNN,NBAS,HMGA2,CDC6,PLK4
Human Phenotype	HP:0002973	Abnormality of the forearm			0.001594	1	0.02066	0.1784	13	202	BRIP1,BCOR,CHN1,HOXA11,BRCA1,COL2A1,RAD51,NSD2,FANCL,CHD7,FANCI,LRP4,FZD2
Human Phenotype	HP:0000072	Hydroureter			0.00163	1	0.02105	0.1817	7	69	BRIP1,BCOR,GPC3,SYT1,RAD51,FANCL,FANCI
Human Phenotype	HP:0008554	Cochlear malformation			0.001661	1	0.02121	0.1831	3	10	EYA1,CHD7,SIX1
Human Phenotype	HP:0003221	Chromosomal breakage induced by crosslinking agents			0.001661	1	0.02121	0.1831	3	10	BRIP1,BRCA1,FANCI
Human Phenotype	HP:0010293	Aplasia/Hypoplasia of the uvula			0.001666	1	0.02121	0.1831	4	21	BRIP1,RAD51,FANCL,FANCI
Human Phenotype	HP:0000290	Abnormality of the forehead			0.00167	1	0.02121	0.1831	30	694	BRIP1,CENPE,DLK1,EZH2,TRIP13,BUB1,BUB1B,ASPM,KIF14,PLAG1,FOXC1,KIF11,COL2A1,RAD51,DPP6,NSD2,FANCL,STIL,GMNN,NBAS,HMGA2,FANCI,ASNS,DLL3,LRP4,PRKDC,CDC6,FZD2,PLK4,KDM1A
Human Phenotype	HP:0009821	Forearm undergrowth			0.001684	1	0.0213	0.1839	8	89	BRIP1,CHN1,COL2A1,RAD51,FANCL,CHD7,FANCI,LRP4
Human Phenotype	HP:0006496	Aplasia/hypoplasia involving bones of the upper limbs			0.001714	1	0.0216	0.1864	27	601	SOX11,BRIP1,CENPE,BCOR,EZH2,CHN1,CHRNA1,NEK2,GPC3,BRCA1,PLAG1,FGF8,COL2A1,RAD51,NSD2,WT1,FANCL,CHD7,LMNB2,STIL,GMNN,HMGA2,FANCI,LRP4,FZD2,KDM1A,MYB
Human Phenotype	HP:0002863	Myelodysplasia			0.001743	1	0.02187	0.1888	13	204	BRIP1,EZH2,TRIP13,STAT4,BRCA1,BUB1,BUB1B,DNMT3A,RAD51,FANCL,STIL,FANCI,MYB
Human Phenotype	HP:0001143	Small eyes			0.001757	1	0.02187	0.1888	17	309	BRIP1,HMGB3,BCOR,CHN1,TRIP13,NEK2,SALL1,BRCA1,BUB1,BUB1B,KIF11,RAD51,FANCL,CHD7,FANCI,PAX2,PLK4
Human Phenotype	HP:0000568	Microphthalmia			0.001757	1	0.02187	0.1888	17	309	BRIP1,HMGB3,BCOR,CHN1,TRIP13,NEK2,SALL1,BRCA1,BUB1,BUB1B,KIF11,RAD51,FANCL,CHD7,FANCI,PAX2,PLK4
Human Phenotype	HP:0000286	Epicanthus			0.001785	1	0.02187	0.1888	19	365	MYCN,SOX11,BRIP1,EZH2,TRIP13,CHRNA1,GPC3,BUB1,BUB1B,KIF11,RAD51,TCF3,NSD2,ITGA8,FANCL,CHD7,NBAS,FANCI,HELLS
Human Phenotype	HP:0000772	Abnormality of the ribs			0.001793	1	0.02187	0.1888	14	230	ORC6,DLK1,EZH2,CHRNA1,CDC45,MEOX1,SALL1,GPC3,COL2A1,NSD2,CHD7,GMNN,DLL3,CDC6
Human Phenotype	HP:0000582	Upslanted palpebral fissure			0.001795	1	0.02187	0.1888	12	180	MYCN,BRIP1,TRIP13,BUB1,BUB1B,ASPM,KIF11,RAD51,DPP6,FANCL,STIL,FANCI
Human Phenotype	HP:0008713	Genitourinary tract malformation			0.00181	1	0.02187	0.1888	8	90	SALL1,BRCA1,SYT1,NRTN,ITGA8,EDN3,HMGA2,DLL3
Human Phenotype	HP:0000193	Bifid uvula			0.00181	1	0.02187	0.1888	8	90	ORC6,EYA1,BCOR,CDC45,KIF14,SIX1,GMNN,CDC6
Human Phenotype	HP:0100589	Urogenital fistula			0.00181	1	0.02187	0.1888	8	90	SALL1,BRCA1,SYT1,NRTN,ITGA8,EDN3,HMGA2,DLL3
Human Phenotype	HP:0009117	Aplasia/Hypoplasia of the maxilla			0.001821	1	0.02187	0.1888	13	205	BRIP1,ORC6,DLK1,CDC45,FGF8,FOXC1,COL2A1,RAD51,FANCL,CHD7,GMNN,FANCI,CDC6
Human Phenotype	HP:0000377	Abnormality of the pinna			0.001821	1	0.02187	0.1888	25	542	CENPE,ORC6,HMGB3,DLK1,EYA1,BCOR,EZH2,CHRNA1,CDC45,MEOX1,HOXA2,BLM,SALL1,GPC3,PGAP1,KIF11,DPP6,NSD2,FANCL,CHD7,SIX1,GMNN,ASNS,CDC6,PLK4
Human Phenotype	HP:0008591	Congenital conductive hearing impairment			0.001871	1	0.02187	0.1888	2	3	EYA1,SIX1
Human Phenotype	HP:0011388	Enlarged cochlear aqueduct			0.001871	1	0.02187	0.1888	2	3	EYA1,SIX1
Human Phenotype	HP:0004458	Dilatated internal auditory canal			0.001871	1	0.02187	0.1888	2	3	EYA1,SIX1
Human Phenotype	HP:0100272	Branchial sinus			0.001871	1	0.02187	0.1888	2	3	EYA1,SIX1
Human Phenotype	HP:0006758	Malignant genitourinary tract tumor			0.001871	1	0.02187	0.1888	2	3	MSH2,MSH6
Human Phenotype	HP:0030410	Sebaceous gland carcinoma			0.001871	1	0.02187	0.1888	2	3	MSH2,MSH6
Human Phenotype	HP:0006719	Benign gastrointestinal tract tumors			0.001871	1	0.02187	0.1888	2	3	MSH2,MSH6
Human Phenotype	HP:0006778	Benign genitourinary tract neoplasm			0.001871	1	0.02187	0.1888	2	3	MSH2,MSH6
Human Phenotype	HP:0100790	Hernia			0.001878	1	0.02187	0.1888	21	424	SOX11,BRIP1,DLK1,BCOR,EZH2,WT1-AS,SALL1,GPC3,SYT1,DNMT3A,COL2A1,RAD51,NSD2,WT1,FANCL,CHD7,GMNN,HMGA2,FANCI,DLL3,HELLS
Human Phenotype	HP:0001321	Cerebellar hypoplasia			0.001882	1	0.02187	0.1888	12	181	CENPE,ATP8A2,TUBB2B,TRIP13,PGAP1,BUB1,BUB1B,ASPM,KIF14,VRK1,ASNS,PLK4
Human Phenotype	HP:0000039	Epispadias			0.001911	1	0.02213	0.1911	5	36	ORC6,CDC45,SYT1,GMNN,CDC6
Human Phenotype	HP:0010469	Absent testis			0.001997	1	0.02301	0.1986	4	22	BRIP1,RAD51,FANCL,FANCI
Human Phenotype	HP:0012815	Hypoplastic female external genitalia			0.002002	1	0.02301	0.1986	6	53	ORC6,CDC45,ECEL1,CHD7,GMNN,CDC6
Human Phenotype	HP:0006503	Aplasia/hypoplasia involving forearm bones			0.002046	1	0.0233	0.2011	9	113	BRIP1,CHN1,BRCA1,COL2A1,RAD51,FANCL,CHD7,FANCI,LRP4
Human Phenotype	HP:0040068	Abnormality of limb bone			0.002056	1	0.0233	0.2011	64	1906	MYCN,SOX11,BRIP1,CENPE,ORC6,ATP8A2,ZNF423,TUBB2B,DLK1,EYA1,BCOR,EZH2,CHN1,TRIP13,CHRNA1,STAT4,CDC45,MEOX1,BLM,HOXA11,NEK2,SALL1,GPC3,BRCA1,HOXD10,UCHL1,BUB1,BUB1B,KIF14,PLAG1,FGF8,ECEL1,DNA2,COL2A1,RAD51,DPP6,VRK1,COL13A1,NRTN,NSD2,WT1,ITGA8,FANCL,CHD7,LMNB2,STIL,SIX1,GMNN,EDN3,CEP55,NBAS,HMGA2,FANCI,ASNS,DLL3,AUTS2,LRP4,PRKDC,CDC6,FZD2,PLK4,KDM1A,PCNA,MYB
Human Phenotype	HP:0040064	Abnormality of limbs			0.002056	1	0.0233	0.2011	64	1906	MYCN,SOX11,BRIP1,CENPE,ORC6,ATP8A2,ZNF423,TUBB2B,DLK1,EYA1,BCOR,EZH2,CHN1,TRIP13,CHRNA1,STAT4,CDC45,MEOX1,BLM,HOXA11,NEK2,SALL1,GPC3,BRCA1,HOXD10,UCHL1,BUB1,BUB1B,KIF14,PLAG1,FGF8,ECEL1,DNA2,COL2A1,RAD51,DPP6,VRK1,COL13A1,NRTN,NSD2,WT1,ITGA8,FANCL,CHD7,LMNB2,STIL,SIX1,GMNN,EDN3,CEP55,NBAS,HMGA2,FANCI,ASNS,DLL3,AUTS2,LRP4,PRKDC,CDC6,FZD2,PLK4,KDM1A,PCNA,MYB
Human Phenotype	HP:0002813	Abnormality of limb bone morphology			0.002056	1	0.0233	0.2011	64	1906	MYCN,SOX11,BRIP1,CENPE,ORC6,ATP8A2,ZNF423,TUBB2B,DLK1,EYA1,BCOR,EZH2,CHN1,TRIP13,CHRNA1,STAT4,CDC45,MEOX1,BLM,HOXA11,NEK2,SALL1,GPC3,BRCA1,HOXD10,UCHL1,BUB1,BUB1B,KIF14,PLAG1,FGF8,ECEL1,DNA2,COL2A1,RAD51,DPP6,VRK1,COL13A1,NRTN,NSD2,WT1,ITGA8,FANCL,CHD7,LMNB2,STIL,SIX1,GMNN,EDN3,CEP55,NBAS,HMGA2,FANCI,ASNS,DLL3,AUTS2,LRP4,PRKDC,CDC6,FZD2,PLK4,KDM1A,PCNA,MYB
Human Phenotype	HP:0100886	Abnormality of globe location			0.002079	1	0.02347	0.2026	32	768	BRIP1,ETV1,ETV4,EZH2,CHN1,TRIP13,CHRNA1,CDC45,GPC3,BUB1,BUB1B,ASPM,FGF8,FOXC1,COL2A1,RAD51,DPP6,TCF3,NSD2,WT1,ITGA8,FANCL,CHD7,NBAS,HMGA2,FANCI,AUTS2,LRP4,PRKDC,FZD2,PLK4,HELLS
Human Phenotype	HP:0000824	Growth hormone deficiency			0.002174	1	0.02446	0.2112	9	114	BRIP1,PLAG1,DNA2,RAD51,FANCL,CHD7,GMNN,HMGA2,FANCI
Human Phenotype	HP:0000394	Lop ear			0.002241	1	0.02513	0.2169	3	11	EYA1,CHD7,SIX1
Human Phenotype	HP:0000275	Narrow face			0.002266	1	0.02531	0.2185	7	73	CENPE,EYA1,BCOR,BLM,CHD7,SIX1,PLK4
Human Phenotype	HP:0002553	Highly arched eyebrow			0.00231	1	0.02571	0.2219	9	115	SOX11,ZNF423,BCOR,ASPM,ECEL1,NSD2,CHD7,AUTS2,KDM1A
Human Phenotype	HP:0006740	Transitional cell carcinoma of the bladder			0.002426	1	0.02691	0.2323	6	55	BRIP1,AURKA,BRCA1,BUB1,BUB1B,ODC1
Human Phenotype	HP:0200007	Abnormal size of the palpebral fissures			0.002479	1	0.0274	0.2365	12	187	MYCN,SOX11,BRIP1,DLK1,BCOR,CHN1,SALL1,DNMT3A,RAD51,FANCL,FANCI,AUTS2
Human Phenotype	HP:0100615	Ovarian neoplasm			0.002493	1	0.02745	0.237	10	139	BRIP1,EZH2,BRCA1,RAD51,WT1,FANCL,MSH2,MSH6,HMGA2,FANCI
Human Phenotype	HP:0000085	Horseshoe kidney			0.002647	1	0.02903	0.2506	7	75	GPC3,BRCA1,SYT1,WT1,CHD7,HMGA2,PAX2
Human Phenotype	HP:0000413	Atresia of the external auditory canal			0.002662	1	0.02903	0.2506	6	56	ORC6,EYA1,CDC45,SIX1,GMNN,CDC6
Human Phenotype	HP:0000644	Anterior bulging of the globe			0.002673	1	0.02903	0.2506	14	240	BRIP1,ETV1,ETV4,EZH2,CDC45,ASPM,FOXC1,COL2A1,RAD51,NSD2,FANCL,NBAS,FANCI,PLK4
Human Phenotype	HP:0000520	Proptosis			0.002673	1	0.02903	0.2506	14	240	BRIP1,ETV1,ETV4,EZH2,CDC45,ASPM,FOXC1,COL2A1,RAD51,NSD2,FANCL,NBAS,FANCI,PLK4
Human Phenotype	HP:0002817	Abnormality of the upper limb			0.002685	1	0.02907	0.2509	52	1474	MYCN,SOX11,BRIP1,CENPE,ORC6,ZNF423,DLK1,EYA1,BCOR,EZH2,CHN1,TRIP13,CHRNA1,STAT4,CDC45,MEOX1,BLM,HOXA11,NEK2,SALL1,GPC3,BRCA1,BUB1,BUB1B,PLAG1,FGF8,ECEL1,COL2A1,RAD51,DPP6,NRTN,NSD2,WT1,FANCL,CHD7,LMNB2,STIL,GMNN,EDN3,NBAS,HMGA2,FANCI,ASNS,DLL3,AUTS2,LRP4,PRKDC,CDC6,FZD2,PLK4,KDM1A,MYB
Human Phenotype	HP:0100243	Leiomyosarcoma			0.00273	1	0.02934	0.2533	8	96	BRIP1,ETV1,ETV4,AURKA,BUB1,BUB1B,ODC1,HMGA2
Human Phenotype	HP:0000383	Abnormality of periauricular region			0.00273	1	0.02934	0.2533	8	96	EYA1,BCOR,CHN1,SALL1,GPC3,NSD2,CHD7,SIX1
Human Phenotype	HP:0003005	Ganglioneuroma			0.002748	1	0.02934	0.2533	5	39	MYCN,ETV1,ETV4,NME1,EDN3
Human Phenotype	HP:0030450	Neuroplasm of the autonomic nervous system			0.002748	1	0.02934	0.2533	5	39	MYCN,ETV1,ETV4,NME1,EDN3
Human Phenotype	HP:0007874	Almond-shaped palpebral fissure			0.00279	1	0.02949	0.2546	4	24	BRIP1,RAD51,FANCL,FANCI
Human Phenotype	HP:0006714	Aplasia/Hypoplasia of the sternum			0.00279	1	0.02949	0.2546	4	24	ORC6,TRIP13,BUB1,BUB1B
Human Phenotype	HP:0200005	Abnormal shape of the palpebral fissure			0.00279	1	0.02949	0.2546	4	24	BRIP1,RAD51,FANCL,FANCI
Human Phenotype	HP:0006495	Aplasia/Hypoplasia of the ulna			0.002856	1	0.03009	0.2597	7	76	BRIP1,COL2A1,RAD51,FANCL,CHD7,FANCI,LRP4
Human Phenotype	HP:0012324	Myeloid leukemia			0.002915	1	0.03042	0.2626	6	57	BRIP1,RAD51,FANCL,STIL,FANCI,MYB
Human Phenotype	HP:0001852	Sandal gap			0.002915	1	0.03042	0.2626	6	57	CENPE,EZH2,PLAG1,NBAS,HMGA2,PLK4
Human Phenotype	HP:0002997	Abnormality of the ulna			0.002916	1	0.03042	0.2626	10	142	BRIP1,BCOR,HOXA11,COL2A1,RAD51,NSD2,FANCL,CHD7,FANCI,LRP4
Human Phenotype	HP:0002414	Spina bifida			0.002957	1	0.03074	0.2653	12	191	SOX11,BRIP1,ZNF423,CHN1,MEOX1,GPC3,SYT1,RAD51,WT1,FANCL,FANCI,DLL3
Human Phenotype	HP:0007360	Aplasia/Hypoplasia of the cerebellum			0.003023	1	0.03132	0.2704	15	270	SOX11,CENPE,ATP8A2,TUBB2B,TRIP13,PGAP1,BUB1,BUB1B,ASPM,KIF14,VRK1,NSD2,CHD7,ASNS,PLK4
Human Phenotype	HP:0004467	Preauricular pit			0.003078	1	0.03157	0.2725	5	40	EYA1,SALL1,GPC3,NSD2,SIX1
Human Phenotype	HP:0100277	Periauricular skin pits			0.003078	1	0.03157	0.2725	5	40	EYA1,SALL1,GPC3,NSD2,SIX1
Human Phenotype	HP:0002500	Abnormality of the cerebral white matter			0.003082	1	0.03157	0.2725	25	563	SOX11,CENPE,ATP8A2,ZNF423,TUBB2B,BCOR,TRIP13,SALL1,GPC3,PGAP1,BUB1,BUB1B,ASPM,KIF14,FOXC1,NRTN,NSD2,MSH2,STIL,EDN3,MSH6,LMNB1,ASNS,PRKDC,KDM1A
Human Phenotype	HP:0000368	Low-set, posteriorly rotated ears			0.003087	1	0.03157	0.2725	12	192	ZNF423,BCOR,EZH2,TRIP13,GPC3,BUB1,BUB1B,PLAG1,NSD2,CHD7,HMGA2,DLL3
Human Phenotype	HP:0100273	Neoplasm of the colon			0.003107	1	0.03167	0.2734	8	98	MYCN,EZH2,TRIP13,BRCA1,BUB1,BUB1B,MSH2,MSH6
Human Phenotype	HP:0008736	Hypoplasia of penis			0.003173	1	0.03224	0.2783	18	355	ORC6,EZH2,TRIP13,CDC45,NEK2,SALL1,GPC3,BUB1,BUB1B,SYT1,FGF8,WT1,FANCL,CHD7,GMNN,PRKDC,CDC6,FZD2
Human Phenotype	HP:0002814	Abnormality of the lower limb			0.003201	1	0.03242	0.2799	48	1340	MYCN,SOX11,BRIP1,CENPE,ORC6,ATP8A2,ZNF423,TUBB2B,DLK1,EYA1,BCOR,EZH2,CHN1,STAT4,CDC45,HOXA11,SALL1,GPC3,BRCA1,HOXD10,UCHL1,KIF14,PLAG1,FGF8,ECEL1,COL2A1,RAD51,DPP6,VRK1,COL13A1,NSD2,WT1,ITGA8,FANCL,CHD7,SIX1,GMNN,CEP55,NBAS,HMGA2,FANCI,ASNS,DLL3,CDC6,FZD2,PLK4,KDM1A,PCNA
Human Phenotype	HP:0002242	Abnormal intestine morphology			0.003271	1	0.03295	0.2844	41	1094	MYCN,BRIP1,ZNF423,MCM6,EYA1,BCOR,EZH2,TRIP13,STAT4,CDC45,BLM,AURKA,SALL1,GPC3,BRCA1,NRXN1,BUB1,BUB1B,SYT1,PLAG1,NME1,RAD51,TCF3,KIF23,NRTN,NSD2,WT1,ITGA8,FANCL,CHD7,MSH2,ODC1,SIX1,EDN3,MSH6,HMGA2,LMNB1,FANCI,KDM1A,MYB,HELLS
Human Phenotype	HP:0000022	Abnormality of male internal genitalia			0.003274	1	0.03295	0.2844	39	1025	SOX11,BRIP1,ORC6,DLK1,BCOR,EZH2,TRIP13,STAT4,CDC45,BLM,NEK2,WT1-AS,SALL1,GPC3,BRCA1,BUB1,BUB1B,SYT1,PLAG1,FGF8,UNG,COL2A1,RAD51,NRTN,NSD2,WT1,FANCL,CHD7,MSH2,GMNN,EDN3,MSH6,HMGA2,ADGRG2,FANCI,DLL3,CDC6,FZD2,KDM1A
Human Phenotype	HP:0000422	Abnormality of the nasal bridge			0.003392	1	0.034	0.2935	30	726	MYCN,SOX11,ORC6,ZNF423,DLK1,EYA1,BCOR,EZH2,CHN1,TRIP13,NEK2,GPC3,BUB1,BUB1B,KIF14,FGF8,FOXC1,KIF11,COL2A1,NSD2,FANCL,CHD7,EDN3,HMGA2,DLL3,PRKDC,FZD2,PLK4,KDM1A,HELLS
Human Phenotype	HP:0000326	Abnormality of the maxilla			0.0034	1	0.034	0.2935	13	220	BRIP1,ORC6,DLK1,CDC45,FGF8,FOXC1,COL2A1,RAD51,FANCL,CHD7,GMNN,FANCI,CDC6
Human Phenotype	HP:0100555	Asymmetric growth			0.003474	1	0.03463	0.2989	6	59	SALL1,GPC3,PLAG1,COL2A1,WT1,HMGA2
Human Phenotype	HP:0000110	Renal dysplasia			0.003523	1	0.03501	0.3022	8	100	EYA1,SALL1,GPC3,WT1,ITGA8,SIX1,CEP55,PAX2
Human Phenotype	HP:0002575	Tracheoesophageal fistula			0.003558	1	0.03525	0.3043	7	79	MYCN,BRIP1,RAD51,ITGA8,FANCL,CHD7,FANCI
Human Phenotype	HP:0012118	Laryngeal carcinoma			0.003679	1	0.03565	0.3078	2	4	MSH2,MSH6
Human Phenotype	HP:0002057	Prominent glabella			0.003679	1	0.03565	0.3078	2	4	NSD2,NBAS
Human Phenotype	HP:0002056	Abnormality of the glabella			0.003679	1	0.03565	0.3078	2	4	NSD2,NBAS
Human Phenotype	HP:0011891	Post-partum hemorrhage			0.003679	1	0.03565	0.3078	2	4	KIF23,HMGA2
Human Phenotype	HP:0100605	Neoplasm of the larynx			0.003679	1	0.03565	0.3078	2	4	MSH2,MSH6
Human Phenotype	HP:0010782	Shoulder dimple			0.003679	1	0.03565	0.3078	2	4	PLAG1,HMGA2
Human Phenotype	HP:0009798	Euthyroid goiter			0.003679	1	0.03565	0.3078	2	4	EYA1,SIX1
Human Phenotype	HP:0008663	Renal sarcoma			0.003775	1	0.03625	0.313	4	26	ETV1,ETV4,GPC3,WT1
Human Phenotype	HP:0012880	Abnormality of the labia minora			0.003775	1	0.03625	0.313	4	26	ORC6,CDC45,GMNN,CDC6
Human Phenotype	HP:0010481	Urethral valve			0.003775	1	0.03625	0.313	4	26	SALL1,SYT1,PLAG1,HMGA2
Human Phenotype	HP:0000122	Unilateral renal agenesis			0.003819	1	0.03649	0.315	7	80	GPC3,ASPM,SYT1,FGF8,WT1,CHD7,STIL
Human Phenotype	HP:0000813	Bicornuate uterus			0.003823	1	0.03649	0.315	5	42	BRIP1,RAD51,ITGA8,FANCL,FANCI
Human Phenotype	HP:0100242	Sarcoma			0.003857	1	0.0367	0.3168	20	420	BRIP1,ETV1,BARD1,ETV4,HMMR,EZH2,TRIP13,AURKA,GPC3,BRCA1,BUB1,BUB1B,RAD51,WT1,FANCL,MSH2,ODC1,MSH6,HMGA2,FANCI
Human Phenotype	HP:0001560	Abnormality of the amniotic fluid			0.003897	1	0.03697	0.3192	16	305	MYCN,BRIP1,DLK1,TRIP13,CHRNA1,GPC3,BUB1,BUB1B,KIF14,COL2A1,RAD51,WT1,ITGA8,FANCL,CHD7,FANCI
Human Phenotype	HP:0010460	Abnormality of the female genitalia			0.003912	1	0.03701	0.3195	34	865	BRIP1,ORC6,BCOR,EZH2,TRIP13,CDC45,AURKA,NEK2,SALL1,BRCA1,BUB1,BUB1B,KIF14,SYT1,PLAG1,FGF8,ECEL1,RAD51,NRTN,NSD2,WT1,ITGA8,FANCL,CHD7,MSH2,LMNB2,ODC1,GMNN,EDN3,MSH6,HMGA2,FANCI,DLL3,CDC6
Human Phenotype	HP:0000365	Hearing impairment			0.004006	1	0.03779	0.3262	44	1211	MYCN,SOX11,BRIP1,ORC6,MCM2,EYA1,BCOR,CHN1,TRIP13,STAT4,SMPX,CDC45,HOXA1,MEOX1,HOXA2,HOXA11,NEK2,SALL1,GPC3,BRCA1,BUB1,BUB1B,ASPM,FGF8,FOXC1,COL2A1,RAD51,NRTN,NSD2,IARS1,FANCL,CHD7,LMNB2,SIX1,GMNN,EDN3,DNAAF2,LMNB1,FANCI,LRP4,TMPO,PAX2,PRKDC,CDC6
Human Phenotype	HP:0010311	Aplasia/Hypoplasia of the breasts			0.004109	1	0.03834	0.331	6	61	ORC6,CDC45,FGF8,CHD7,GMNN,CDC6
Human Phenotype	HP:0000208	Submucous cleft lip/palate			0.004109	1	0.03834	0.331	6	61	ORC6,BCOR,CDC45,GPC3,GMNN,CDC6
Human Phenotype	HP:0002948	Vertebral fusion			0.004109	1	0.03834	0.331	6	61	CHN1,CHRNA1,MEOX1,GPC3,NSD2,DLL3
Human Phenotype	HP:0010442	Polydactyly			0.004119	1	0.03834	0.331	17	335	BRIP1,ZNF423,BCOR,CHN1,CDC45,BLM,NEK2,SALL1,GPC3,BRCA1,COL2A1,RAD51,NSD2,WT1,FANCL,CHD7,FANCI
Human Phenotype	HP:0100007	Neoplasm of the peripheral nervous system			0.004126	1	0.03834	0.331	13	225	MYCN,ETV1,ETV4,EZH2,GPC3,BRCA1,NME1,NRTN,WT1,MSH2,EDN3,MSH6,HMGA2
Human Phenotype	HP:0040069	Abnormal lower limb bone morphology			0.004286	1	0.03971	0.3428	25	577	MYCN,SOX11,BRIP1,CENPE,ORC6,ZNF423,DLK1,EZH2,CDC45,SALL1,GPC3,HOXD10,KIF14,PLAG1,ECEL1,COL2A1,RAD51,NSD2,WT1,FANCL,CHD7,GMNN,HMGA2,FANCI,CDC6
Human Phenotype	HP:0002778	Abnormal trachea morphology			0.004334	1	0.04003	0.3456	10	150	MYCN,BRIP1,ORC6,COL2A1,RAD51,ITGA8,FANCL,CHD7,GMNN,FANCI
Human Phenotype	HP:0010461	Abnormality of the male genitalia			0.004391	1	0.04044	0.3491	42	1146	SOX11,BRIP1,ORC6,DLK1,BCOR,EZH2,TRIP13,STAT4,CDC45,BLM,NEK2,WT1-AS,SALL1,GPC3,BRCA1,BUB1,BUB1B,SYT1,PLAG1,FGF8,UNG,FOXC1,COL2A1,RAD51,NRTN,NSD2,WT1,FANCL,CHD7,MSH2,GMNN,EDN3,MSH6,HMGA2,LMNB1,ADGRG2,FANCI,DLL3,PRKDC,CDC6,FZD2,KDM1A
Human Phenotype	HP:0012243	Abnormal reproductive system morphology			0.004412	1	0.04052	0.3498	48	1360	SOX11,BRIP1,ORC6,DLK1,BCOR,EZH2,TRIP13,STAT4,CDC45,BLM,AURKA,NEK2,WT1-AS,SALL1,GPC3,BRCA1,BUB1,BUB1B,KIF14,SYT1,PLAG1,FGF8,UNG,ECEL1,FOXC1,COL2A1,RAD51,NRTN,NSD2,WT1,ITGA8,FANCL,CHD7,MSH2,LMNB2,ODC1,GMNN,EDN3,MSH6,HMGA2,LMNB1,ADGRG2,FANCI,DLL3,PRKDC,CDC6,FZD2,KDM1A
Human Phenotype	HP:0000325	Triangular face			0.004484	1	0.04088	0.3529	8	104	MYCN,ORC6,TRIP13,BUB1,BUB1B,PLAG1,HMGA2,CDC6
Human Phenotype	HP:0000366	Abnormality of the nose			0.004485	1	0.04088	0.3529	47	1325	MYCN,SOX11,BRIP1,CENPE,ORC6,ZNF423,DLK1,EYA1,BCOR,EZH2,CHN1,TRIP13,CHRNA1,CDC45,BLM,NEK2,GPC3,BUB1,BUB1B,KIF14,FGF8,UNG,ECEL1,DNA2,FOXC1,KIF11,COL2A1,RAD51,TCF3,RNASEH2A,NSD2,ITGA8,FANCL,CHD7,GMNN,EDN3,DNAAF2,HMGA2,FANCI,DLL3,AUTS2,LRP4,PRKDC,FZD2,PLK4,KDM1A,HELLS
Human Phenotype	HP:0008062	Aplasia/Hypoplasia affecting the anterior segment of the eye			0.004519	1	0.04088	0.3529	9	127	BRIP1,CHN1,GPC3,FOXC1,RAD51,NSD2,WT1,FANCL,FANCI
Human Phenotype	HP:0004299	Hernia of the abdominal wall			0.004529	1	0.04088	0.3529	18	367	BRIP1,DLK1,BCOR,EZH2,WT1-AS,SALL1,GPC3,SYT1,DNMT3A,COL2A1,RAD51,FANCL,CHD7,GMNN,HMGA2,FANCI,DLL3,HELLS
Human Phenotype	HP:0030061	Neuroectodermal neoplasm			0.004529	1	0.04088	0.3529	18	367	MYCN,ETV1,ETV4,EZH2,BLM,NEK2,GPC3,BRCA1,PLAG1,NME1,NRTN,WT1,MSH2,STIL,EDN3,MSH6,HMGA2,MYB
Human Phenotype	HP:0030060	Nervous tissue neoplasm			0.004529	1	0.04088	0.3529	18	367	MYCN,ETV1,ETV4,EZH2,BLM,NEK2,GPC3,BRCA1,PLAG1,NME1,NRTN,WT1,MSH2,STIL,EDN3,MSH6,HMGA2,MYB
Human Phenotype	HP:0005584	Renal cell carcinoma			0.004544	1	0.04089	0.353	10	151	BRIP1,EZH2,AURKA,GPC3,BRCA1,BUB1,BUB1B,WT1,ODC1,HMGA2
Human Phenotype	HP:0002648	Abnormality of calvarial morphology			0.004635	1	0.04159	0.3591	31	774	MYCN,BRIP1,CENPE,ORC6,ZNF423,DLK1,EZH2,CHN1,TRIP13,CDC45,BLM,BUB1,BUB1B,PLAG1,KIF11,COL2A1,RAD51,RNASEH2A,NSD2,FANCL,GMNN,NBAS,HMGA2,FANCI,DLL3,AUTS2,LRP4,CDC6,FZD2,PLK4,KDM1A
Human Phenotype	HP:0000494	Downslanted palpebral fissures			0.004717	1	0.04221	0.3644	16	311	CENPE,ORC6,EZH2,TRIP13,GPC3,BUB1,BUB1B,KIF11,NSD2,CHD7,GMNN,EDN3,AUTS2,LRP4,PLK4,KDM1A
Human Phenotype	HP:0000076	Vesicoureteral reflux			0.004759	1	0.04247	0.3666	9	128	EYA1,CDC45,SALL1,ASPM,SYT1,CHD7,STIL,SIX1,PAX2
Human Phenotype	HP:0000079	Abnormality of the urinary system			0.004784	1	0.04257	0.3675	57	1697	MYCN,SOX11,BRIP1,ORC6,ZNF423,ETV1,ETV4,EYA1,BCOR,EZH2,CHN1,TRIP13,STAT4,CDC45,MEOX1,AURKA,NEK2,SALL1,GPC3,BRCA1,BUB1,BUB1B,ASPM,KIF14,SYT1,PLAG1,FGF8,NME1,DNA2,FOXC1,RAD51,KIF23,NRTN,NSD2,SH3GL3,WT1,ITGA8,FANCL,CHD7,MSH2,LMNB2,ODC1,STIL,SIX1,GMNN,EDN3,CEP55,MSH6,HMGA2,LMNB1,ADGRG2,FANCI,DLL3,LRP4,PAX2,CDC6,FZD2
Human Phenotype	HP:0100559	Lower limb asymmetry			0.004973	1	0.044	0.3798	4	28	SALL1,PLAG1,COL2A1,HMGA2
Human Phenotype	HP:0002888	Ependymoma			0.004973	1	0.044	0.3798	4	28	ETV1,ETV4,MSH2,MSH6
Human Phenotype	HP:0000035	Abnormal testis morphology			0.005108	1	0.04507	0.3891	35	913	SOX11,BRIP1,ORC6,DLK1,BCOR,EZH2,TRIP13,STAT4,CDC45,BLM,NEK2,WT1-AS,SALL1,GPC3,BRCA1,BUB1,BUB1B,SYT1,PLAG1,FGF8,COL2A1,RAD51,NRTN,NSD2,WT1,FANCL,CHD7,GMNN,EDN3,HMGA2,FANCI,DLL3,CDC6,FZD2,KDM1A
Human Phenotype	HP:0000504	Abnormality of vision			0.005139	1	0.04522	0.3904	38	1016	MYCN,BRIP1,ATP8A2,ZNF423,TUBB2B,BCOR,EZH2,CHN1,TRIP13,STAT4,NEK2,SALL2,SALL1,UCHL1,PGAP1,BUB1,BUB1B,FGF8,FOXC1,KIF11,COL2A1,RAD51,DPP6,SOBP,WT1,FANCL,CHD7,MSH2,EDN3,NBAS,MSH6,LMNB1,FANCI,ASNS,PAX2,PRKDC,PLK4,PCNA
Human Phenotype	HP:0004810	Congenital hypoplastic anemia			0.00517	1	0.04536	0.3916	5	45	BRIP1,RAD51,KIF23,FANCL,FANCI
Human Phenotype	HP:0002827	Hip dislocation			0.005213	1	0.04545	0.3924	11	179	BRIP1,EYA1,HOXA11,GPC3,ECEL1,COL2A1,RAD51,NSD2,FANCL,SIX1,FANCI
Human Phenotype	HP:0410043	Abnormal neural tube morphology			0.005252	1	0.04545	0.3924	12	205	SOX11,BRIP1,ZNF423,CHN1,MEOX1,GPC3,SYT1,RAD51,WT1,FANCL,FANCI,DLL3
Human Phenotype	HP:0010301	Spinal dysraphism			0.005252	1	0.04545	0.3924	12	205	SOX11,BRIP1,ZNF423,CHN1,MEOX1,GPC3,SYT1,RAD51,WT1,FANCL,FANCI,DLL3
Human Phenotype	HP:0045005	Neural tube defect			0.005252	1	0.04545	0.3924	12	205	SOX11,BRIP1,ZNF423,CHN1,MEOX1,GPC3,SYT1,RAD51,WT1,FANCL,FANCI,DLL3
Human Phenotype	HP:0010785	Gonadal neoplasm			0.005252	1	0.04545	0.3924	12	205	BRIP1,EZH2,GPC3,BRCA1,PLAG1,RAD51,WT1,FANCL,MSH2,MSH6,HMGA2,FANCI
Human Phenotype	HP:0000889	Abnormality of the clavicle			0.005329	1	0.04595	0.3966	8	107	SOX11,ORC6,DLK1,EYA1,BCOR,CDC45,GMNN,CDC6
Human Phenotype	HP:0009824	Upper limb undergrowth			0.005339	1	0.04595	0.3966	16	315	BRIP1,EZH2,CHN1,NEK2,GPC3,FGF8,COL2A1,RAD51,NSD2,WT1,FANCL,CHD7,STIL,FANCI,LRP4,MYB
Human Phenotype	HP:0004298	Abnormality of the abdominal wall			0.005448	1	0.04676	0.4037	20	433	BRIP1,DLK1,BCOR,EZH2,WT1-AS,SALL1,GPC3,SYT1,DNMT3A,COL2A1,RAD51,NRTN,FANCL,CHD7,GMNN,EDN3,HMGA2,FANCI,DLL3,HELLS
Human Phenotype	HP:0001402	Hepatocellular carcinoma			0.00554	1	0.04725	0.4079	9	131	BRIP1,EZH2,PLAG1,RAD51,FANCL,MSH2,MSH6,HMGA2,FANCI
Human Phenotype	HP:0003241	External genital hypoplasia			0.005546	1	0.04725	0.4079	21	464	ORC6,EZH2,TRIP13,CDC45,NEK2,SALL1,GPC3,BUB1,BUB1B,SYT1,PLAG1,FGF8,ECEL1,WT1,FANCL,CHD7,GMNN,HMGA2,PRKDC,CDC6,FZD2
Human Phenotype	HP:0010614	Fibroma			0.00555	1	0.04725	0.4079	15	288	BRIP1,ETV1,BARD1,ETV4,HMMR,EZH2,GPC3,BRCA1,RAD51,WT1,FANCL,MSH2,MSH6,HMGA2,FANCI
Human Phenotype	HP:0000058	Abnormality of the labia			0.005633	1	0.04783	0.4129	6	65	ORC6,CDC45,ECEL1,CHD7,GMNN,CDC6
Human Phenotype	HP:0100587	Abnormality of the preputium			0.005657	1	0.04789	0.4134	4	29	BRIP1,RAD51,FANCL,FANCI
Human Phenotype	HP:0000611	Choroid coloboma			0.005686	1	0.04789	0.4134	5	46	ZNF423,BCOR,CHN1,SALL1,CHD7
Human Phenotype	HP:0000567	Chorioretinal coloboma			0.005686	1	0.04789	0.4134	5	46	ZNF423,BCOR,CHN1,SALL1,CHD7
Human Phenotype	HP:0000050	Hypoplastic male external genitalia			0.005735	1	0.04818	0.4159	20	435	ORC6,EZH2,TRIP13,CDC45,NEK2,SALL1,GPC3,BUB1,BUB1B,SYT1,PLAG1,FGF8,WT1,FANCL,CHD7,GMNN,HMGA2,PRKDC,CDC6,FZD2
Human Phenotype	HP:0002438	Cerebellar malformation			0.005889	1	0.04924	0.4251	14	262	MYCN,SOX11,ZNF423,TRIP13,CDC45,SALL1,GPC3,BUB1,BUB1B,FOXC1,CHD7,HMGA2,PAX2,PRKDC
Human Phenotype	HP:0030311	Lower extremity joint dislocation			0.005894	1	0.04924	0.4251	12	208	BRIP1,EYA1,HOXA11,GPC3,ECEL1,COL2A1,RAD51,NSD2,FANCL,SIX1,FANCI,FZD2
Human Phenotype	HP:0012316	Fibrous tissue neoplasm			0.005914	1	0.04928	0.4254	15	290	BRIP1,ETV1,BARD1,ETV4,HMMR,EZH2,GPC3,BRCA1,RAD51,WT1,FANCL,MSH2,MSH6,HMGA2,FANCI
Human Phenotype	HP:0000316	Hypertelorism			0.005999	1	0.04959	0.4281	23	529	BRIP1,EZH2,TRIP13,CHRNA1,GPC3,BUB1,BUB1B,FGF8,FOXC1,COL2A1,RAD51,TCF3,NSD2,ITGA8,FANCL,CHD7,NBAS,HMGA2,FANCI,AUTS2,LRP4,FZD2,HELLS
Human Phenotype	HP:0100826	Neoplasm of the nail			0.00603	1	0.04959	0.4281	2	5	MSH2,MSH6
Human Phenotype	HP:0100804	Ungual fibroma			0.00603	1	0.04959	0.4281	2	5	MSH2,MSH6
Human Phenotype	HP:0007925	Lacrimal duct aplasia			0.00603	1	0.04959	0.4281	2	5	EYA1,SIX1
Human Phenotype	HP:0006717	Peripheral neuroepithelioma			0.00603	1	0.04959	0.4281	2	5	ETV1,ETV4
Human Phenotype	HP:0011024	Abnormality of the gastrointestinal tract			0.006054	1	0.04966	0.4287	52	1527	MYCN,BRIP1,ORC6,ZNF423,ETV1,ETV4,MCM6,EYA1,BCOR,EZH2,CHN1,TRIP13,CHRNA1,STAT4,CDC45,MEOX1,BLM,AURKA,SALL1,GPC3,BRCA1,NRXN1,BUB1,BUB1B,SYT1,PLAG1,NME1,FOXC1,RAD51,TCF3,KIF23,COL13A1,NRTN,NSD2,WT1,ITGA8,FANCL,CHD7,MSH2,ODC1,SIX1,GMNN,EDN3,MSH6,HMGA2,LMNB1,FANCI,CDC6,KDM1A,PCNA,MYB,HELLS
Human Phenotype	HP:0000174	Abnormal palate morphology			0.006086	1	0.04979	0.4299	33	855	MYCN,SOX11,BRIP1,ORC6,EYA1,BCOR,CHN1,TRIP13,CHRNA1,CDC45,MEOX1,HOXA2,GPC3,BUB1,BUB1B,KIF14,FGF8,ECEL1,COL2A1,RAD51,TCF3,SLC25A21,COL13A1,NSD2,ITGA8,FANCL,CHD7,SIX1,GMNN,ARID3B,FANCI,DLL3,CDC6
Mouse Phenotype	MP:0014134	abnormal embryo morphology			3.396e-19	1.477e-15	1.477e-15	1.323e-14	109	1654	CDK8,NUSAP1,MYCN,SOX11,PTTG1,TGIF2,CENPA,ORC6,MYO10,PATZ1,LAPTM4B,DACH1,BARD1,ETV4,NASP,ETV5,MCM2,MCM3,MCM4,MARCKSL1,CHEK1,EYA1,DBN1,MCM10,BCL7A,BCOR,RRM1,EZH2,GINS1,GFRA1,CDC7,HOXA1,MEOX1,HOXA2,BLM,FZD7,AURKA,JARID2,MEST,CDK5R1,SALL2,SALL1,FBXO5,GPC3,BRCA1,DBF4,PGAP1,DHFR,BUB1B,FEN1,PLAG1,PRMT1,FGF8,FOXC1,KIF11,DNMT3A,COL2A1,RAD51,RANBP1,TCF3,RAE1,RNASEH2A,FZD3,MIS18A,UBE2C,WT1,CENPU,APEX1,BIRC5…
Mouse Phenotype	MP:0003077	abnormal cell cycle			6.262e-17	2.724e-13	1.362e-13	1.22e-12	43	341	NUSAP1,KIF18A,PTTG1,CENPA,CENPE,PATZ1,MCM2,MCM3,MCM4,CHEK1,EYA1,CDC7,BLM,AURKA,FBXO5,BRCA1,BUB1,BUB1B,ASPM,FGF8,DNA2,FOXM1,RANBP1,RAE1,MIS18A,BIRC5,E2F5,MSH2,NCAPH,CDCA8,GMNN,CCNA2,TPX2,TMPO,CDK1,CDC20,CDC25A,PLK4,KDM1A,MAD2L1,CDK2,HDAC2,AURKB
Mouse Phenotype	MP:0004046	abnormal mitosis			5.991e-14	2.606e-10	7.912e-11	7.085e-10	27	162	NUSAP1,KIF18A,PTTG1,CENPA,CENPE,EYA1,BLM,AURKA,FBXO5,BUB1,BUB1B,FGF8,DNA2,RAE1,MIS18A,BIRC5,NCAPH,CDCA8,GMNN,TPX2,CDK1,CDC20,CDC25A,PLK4,MAD2L1,HDAC2,AURKB
Mouse Phenotype	MP:0011096	embryonic lethality between implantation and somite formation, complete penetrance			7.275e-14	3.165e-10	7.912e-11	7.085e-10	36	295	CENPA,CENPE,BARD1,MCM4,PFAS,CHEK1,EZH2,GINS1,CDC7,CDC45,BRCA1,BUB1,BUB1B,PRMT1,TIMELESS,KIF11,RAD51,RAE1,RBBP4,APEX1,BIRC5,ODC1,GMNN,CCNA2,ZWINT,IPO9,CSE1L,TENM4,PRIM1,H2AZ1,SMARCC1,CDC20,CDC25A,PLK4,KDM1A,MAD2L1
Mouse Phenotype	MP:0006205	embryonic lethality between implantation and somite formation			1.39e-12	6.044e-09	1.209e-09	1.083e-08	36	325	CENPA,CENPE,BARD1,MCM4,PFAS,CHEK1,EZH2,GINS1,CDC7,CDC45,BRCA1,BUB1,BUB1B,PRMT1,TIMELESS,KIF11,RAD51,RAE1,RBBP4,APEX1,BIRC5,ODC1,GMNN,CCNA2,ZWINT,IPO9,CSE1L,TENM4,PRIM1,H2AZ1,SMARCC1,CDC20,CDC25A,PLK4,KDM1A,MAD2L1
Mouse Phenotype	MP:0002718	abnormal inner cell mass morphology			1.959e-12	8.52e-09	1.42e-09	1.272e-08	19	86	NUSAP1,CENPA,BARD1,MCM10,CDC7,AURKA,FBXO5,FEN1,RAE1,MIS18A,BIRC5,ECT2,GMNN,H2AZ1,RACGAP1,SMARCC1,CDC25A,MAD2L1,AURKB
Mouse Phenotype	MP:0010866	abnormal prenatal body size			3.444e-11	1.498e-07	2.14e-08	1.917e-07	70	1103	CDK8,NUSAP1,MYCN,SOX11,PTTG1,CENPA,MYO10,PATZ1,LAPTM4B,DACH1,BARD1,NASP,MCM3,MCM4,EYA1,DBN1,BCL7A,RRM1,EZH2,CDC7,BLM,FZD7,AURKA,JARID2,MEST,CDK5R1,CADM1,GPC3,BRCA1,DBF4,PGAP1,DHFR,BUB1,FEN1,PLAG1,FGF8,MACROH2A2,FOXC1,KIF11,NOVA1,DNMT3A,COL2A1,RAD51,RANBP1,RNASEH2A,NSD2,UBE2C,WT1,CENPU,FANCL,CITED1,LMNB2,SIX1,SUV39H2,E2F8,CCNE1,DNAAF2,CSE1L,LMNB1,CCNE2,CDC20,FZD2,TMEM100,PLK4,TCF7L1,KDM1A,MAD2L1,C…
Mouse Phenotype	MP:0004196	abnormal prenatal growth/weight/body size			4.569e-11	1.988e-07	2.39e-08	2.14e-07	83	1440	CDK8,NUSAP1,MYCN,SOX11,PTTG1,TGIF2,CENPA,MYO10,PATZ1,PEG10,LAPTM4B,DACH1,BARD1,NASP,MCM3,MCM4,HIC2,DLK1,EYA1,DBN1,BCL7A,RRM1,EZH2,CDC7,BLM,FZD7,AURKA,JARID2,MEST,CDK5R1,CADM1,SALL1,GPC3,BRCA1,DBF4,PGAP1,DHFR,BUB1,BUB1B,FEN1,PLAG1,FGF8,MACROH2A2,FOXC1,KIF11,NOVA1,DNMT3A,COL2A1,RAD51,RANBP1,RNASEH2A,NSD2,UBE2C,WT1,CENPU,APEX1,FANCL,CITED1,LMNB2,STIL,SIX1,SUV39H2,E2F8,ARID3B,CCNE1,DNAAF2,CSE1L,TENM4…
Mouse Phenotype	MP:0003111	abnormal cell nucleus morphology			4.945e-11	2.151e-07	2.39e-08	2.14e-07	26	198	PTTG1,BRIP1,CENPA,MCM2,MCM4,CHEK1,TTK,AURKA,BRCA1,BUB1,BUB1B,FEN1,DNA2,BIRC5,NCAPH,CDCA8,GMNN,LMNB1,TPX2,CDK1,CDC20,CDC25A,MAD2L1,HDAC2,AURKB,HELLS
Mouse Phenotype	MP:0002085	abnormal embryonic tissue morphology			8.878e-11	3.862e-07	3.862e-08	3.458e-07	71	1151	CDK8,NUSAP1,MYCN,SOX11,PTTG1,TGIF2,CENPA,MYO10,PATZ1,LAPTM4B,BARD1,ETV4,ETV5,MCM2,MCM3,MCM4,MARCKSL1,CHEK1,EYA1,DBN1,BCOR,EZH2,GINS1,GFRA1,HOXA1,MEOX1,HOXA2,FZD7,JARID2,SALL2,SALL1,BRCA1,PGAP1,FEN1,PRMT1,FGF8,FOXC1,DNMT3A,COL2A1,RAD51,RANBP1,TCF3,FZD3,WT1,APEX1,BIRC5,CHD7,STIL,SIX1,E2F8,EDN3,ZWINT,ARID3B,DNAAF2,CSE1L,TENM4,HEY1,PRIM1,DLL3,AUTS2,LRP4,SMARCC1,PAX2,HAS2,FZD2,TMEM100,PLK4,TCF7L1,KDM1…
Mouse Phenotype	MP:0013292	embryonic lethality prior to organogenesis			1.556e-10	6.769e-07	6.153e-08	5.511e-07	61	921	CDK8,NUSAP1,PTTG1,CENPA,CENPE,ORC6,BARD1,NASP,MCM4,PFAS,CHEK1,MCM10,RRM1,RRM2,EZH2,GINS1,CDC7,CDC45,AURKA,FBXO5,BRCA1,DBF4,DHFR,BUB1,BUB1B,FEN1,PRMT1,TIMELESS,KIF11,RAD51,RAE1,RBBP4,MIS18A,DTL,CENPU,APEX1,BIRC5,ODC1,ECT2,CDCA8,GMNN,CCNA2,ZWINT,CCNB1,IPO9,CSE1L,TENM4,WDHD1,PRIM1,H2AZ1,RACGAP1,SMARCC1,CDK1,CDC20,CDC25A,FZD2,PLK4,TOP2A,KDM1A,MAD2L1,PCNA
Mouse Phenotype	MP:0008866	chromosomal instability			1.914e-10	8.324e-07	6.937e-08	6.212e-07	20	123	BRIP1,CENPE,BARD1,MCM2,MCM3,MCM4,MCM6,MCM7,BLM,AURKA,BRCA1,BUB1,BUB1B,FEN1,DNA2,CCNE1,EXO1,H2AX,MAD2L1,HDAC2
Mouse Phenotype	MP:0004023	abnormal chromosome number			2.326e-10	1.012e-06	7.783e-08	6.97e-07	17	87	CENPA,CHEK1,TTK,AURKA,BRCA1,BUB1,BUB1B,FEN1,DNA2,TPX2,CDK1,CDC20,CDC25A,MAD2L1,HDAC2,AURKB,HELLS
Mouse Phenotype	MP:0010094	abnormal chromosome stability			2.581e-10	1.123e-06	8.02e-08	7.182e-07	20	125	BRIP1,CENPE,BARD1,MCM2,MCM3,MCM4,MCM6,MCM7,BLM,AURKA,BRCA1,BUB1,BUB1B,FEN1,DNA2,CCNE1,EXO1,H2AX,MAD2L1,HDAC2
Mouse Phenotype	MP:0002088	abnormal embryonic growth/weight/body size			3.331e-10	1.449e-06	9.66e-08	8.651e-07	73	1236	CDK8,NUSAP1,MYCN,SOX11,PTTG1,TGIF2,CENPA,MYO10,PEG10,LAPTM4B,DACH1,BARD1,NASP,MCM4,HIC2,EYA1,DBN1,BCL7A,RRM1,EZH2,CDC7,BLM,FZD7,AURKA,JARID2,MEST,CDK5R1,SALL1,GPC3,BRCA1,DBF4,DHFR,BUB1B,FEN1,PLAG1,FGF8,FOXC1,KIF11,DNMT3A,COL2A1,RAD51,RANBP1,RNASEH2A,UBE2C,WT1,CENPU,APEX1,FANCL,LMNB2,STIL,SIX1,SUV39H2,E2F8,ARID3B,CCNE1,DNAAF2,CSE1L,TENM4,LMNB1,HEY1,CCNE2,HAS2,CDC20,CDC25A,FZD2,TMEM100,PLK4,TCF7L1,…
Mouse Phenotype	MP:0001697	abnormal embryo size			3.553e-10	1.546e-06	9.661e-08	8.651e-07	61	940	CDK8,NUSAP1,MYCN,SOX11,PTTG1,CENPA,MYO10,LAPTM4B,DACH1,BARD1,NASP,MCM4,EYA1,DBN1,BCL7A,RRM1,EZH2,CDC7,BLM,FZD7,AURKA,JARID2,MEST,CDK5R1,GPC3,BRCA1,DBF4,DHFR,FEN1,PLAG1,FGF8,FOXC1,KIF11,DNMT3A,COL2A1,RAD51,RANBP1,RNASEH2A,UBE2C,WT1,CENPU,FANCL,LMNB2,SIX1,SUV39H2,E2F8,CCNE1,DNAAF2,CSE1L,LMNB1,CCNE2,CDC20,FZD2,TMEM100,PLK4,TCF7L1,KDM1A,MAD2L1,CDK2,AURKB,HELLS
Mouse Phenotype	MP:0010981	abnormal branching involved in ureteric bud morphogenesis			4.5e-10	1.958e-06	1.152e-07	1.031e-06	15	68	EYA1,GFRA1,HOXA11,SALL2,SALL1,GPC3,HOXD11,FGF8,FOXC1,FOXD1,ITGA8,SIX1,LRP4,PAX2,SIX2
Mouse Phenotype	MP:0004936	impaired branching involved in ureteric bud morphogenesis			9.91e-10	4.311e-06	2.315e-07	2.073e-06	14	61	EYA1,GFRA1,HOXA11,SALL2,SALL1,GPC3,HOXD11,FGF8,FOXD1,ITGA8,SIX1,LRP4,PAX2,SIX2
Mouse Phenotype	MP:0000520	absent kidney			1.059e-09	4.606e-06	2.315e-07	2.073e-06	15	72	ETV4,ETV5,EYA1,GFRA1,HOXA11,SALL2,SALL1,HOXD11,FGF8,FOXC1,WT1,ITGA8,SIX1,LRP4,PAX2
Mouse Phenotype	MP:0013293	embryonic lethality prior to tooth bud stage			1.065e-09	4.631e-06	2.315e-07	2.073e-06	64	1040	CDK8,NUSAP1,PTTG1,CENPA,CENPE,ORC6,BARD1,NASP,MCM4,PFAS,CHEK1,MCM10,RRM1,RRM2,EZH2,GINS1,CDC7,CDC45,AURKA,FBXO5,BRCA1,DBF4,DHFR,BUB1,BUB1B,FEN1,DNAJC9,PRMT1,FGF8,TIMELESS,KIF11,RAD51,RAE1,RBBP4,MIS18A,DTL,CENPU,APEX1,BIRC5,ODC1,ECT2,CDCA8,GMNN,CCNA2,ZWINT,CCNB1,IPO9,CSE1L,TENM4,WDHD1,PRIM1,H2AZ1,RACGAP1,SMARCC1,CDK1,CDC20,CDC25A,FZD2,TMEM100,PLK4,TOP2A,KDM1A,MAD2L1,PCNA
Mouse Phenotype	MP:0012431	increased lymphoma incidence			1.143e-09	4.972e-06	2.368e-07	2.12e-06	28	262	BRIP1,MCM2,MCM3,MCM4,MCM6,EZH2,BLM,AURKA,CKS1B,BRCA1,BUB1,BUB1B,FEN1,UNG,DNA2,PCBP4,TCF3,APEX1,MSH2,SUV39H2,MSH6,TPX2,EXO1,H2AX,ROBO1,PRKDC,CDC20,HDAC2
Mouse Phenotype	MP:0008932	abnormal embryonic tissue physiology			1.427e-09	6.207e-06	2.821e-07	2.527e-06	32	337	CDK8,NUSAP1,TGIF2,CENPE,MCM4,CHEK1,EYA1,MCM10,EZH2,GINS1,CDC45,HOXA1,HOXA11,SALL1,BRCA1,HOXD11,BUB1B,FGF8,KIF11,RAD51,RBBP4,MIS18A,WT1,APEX1,CHD7,ODC1,E2F8,ZWINT,DNAAF2,CDC20,MAD2L1,AURKB
Mouse Phenotype	MP:0004024	aneuploidy			1.952e-09	8.492e-06	3.692e-07	3.306e-06	14	64	CENPA,CHEK1,TTK,AURKA,BRCA1,BUB1,BUB1B,FEN1,DNA2,TPX2,CDC20,CDC25A,MAD2L1,HDAC2
Mouse Phenotype	MP:0014137	abnormal preimplantation embryo morphology			2.2e-09	9.571e-06	3.988e-07	3.571e-06	26	235	NUSAP1,CENPA,ORC6,BARD1,MCM10,CDC7,AURKA,FBXO5,BRCA1,BUB1B,FEN1,RAE1,MIS18A,BIRC5,ECT2,GMNN,CCNE1,CCNE2,PRIM1,H2AZ1,RACGAP1,SMARCC1,CDK1,CDC25A,MAD2L1,AURKB
Mouse Phenotype	MP:0009850	embryonic lethality between implantation and placentation			2.483e-09	1.08e-05	4.32e-07	3.869e-06	39	484	CENPA,CENPE,BARD1,MCM4,PFAS,CHEK1,MCM10,EZH2,GINS1,CDC7,CDC45,BRCA1,BUB1,BUB1B,PRMT1,TIMELESS,KIF11,RAD51,RAE1,RBBP4,MIS18A,CENPU,APEX1,BIRC5,ODC1,GMNN,CCNA2,ZWINT,IPO9,CSE1L,TENM4,PRIM1,H2AZ1,SMARCC1,CDC20,CDC25A,PLK4,KDM1A,MAD2L1
Mouse Phenotype	MP:0000350	abnormal cell proliferation			3.339e-09	1.453e-05	5.587e-07	5.003e-06	78	1434	MYCN,SOX11,KIF18A,PTTG1,TGIF2,BRIP1,CENPE,CENPF,PATZ1,ZNF423,DACH1,ETV5,MCM2,MCM3,SRPK1,MCM4,DLK1,ACTL6A,CHEK1,EYA1,MCM10,BCOR,EZH2,GINS1,GFRA1,STAT4,CDC45,AURKA,JARID2,CKS1B,CADM1,SALL1,BRCA1,BUB1,BUB1B,FEN1,KIF14,FGF8,SAC3D1,PCBP4,FOXC1,COL2A1,RAD51,FOXM1,RANBP1,TCF3,VRK1,RAE1,RBBP4,MIS18A,FANCL,CHD7,LMNB2,SIX1,SKP2,GMNN,CCNA2,ZWINT,CCNE1,LMNB1,TIAM1,HEY1,TPX2,H2AX,SMARCC1,TMPO,ROBO1,NEIL3,CDK1…
Mouse Phenotype	MP:0001698	decreased embryo size			4.922e-09	2.141e-05	7.709e-07	6.904e-06	48	694	NUSAP1,MYCN,SOX11,PTTG1,CENPA,MYO10,BARD1,NASP,EZH2,CDC7,BLM,FZD7,AURKA,JARID2,MEST,CDK5R1,BRCA1,DHFR,FEN1,PLAG1,FGF8,FOXC1,KIF11,COL2A1,RAD51,RANBP1,RNASEH2A,WT1,CENPU,FANCL,LMNB2,SIX1,SUV39H2,E2F8,CCNE1,DNAAF2,CSE1L,LMNB1,CCNE2,CDC20,FZD2,PLK4,TCF7L1,KDM1A,MAD2L1,CDK2,AURKB,HELLS
Mouse Phenotype	MP:0006032	abnormal ureteric bud morphology			4.962e-09	2.159e-05	7.709e-07	6.904e-06	15	80	EYA1,GFRA1,HOXA11,SALL2,SALL1,GPC3,HOXD11,FGF8,FOXC1,FOXD1,ITGA8,SIX1,LRP4,PAX2,SIX2
Mouse Phenotype	MP:0004957	abnormal blastocyst morphology			7.153e-09	3.111e-05	1.073e-06	9.608e-06	25	231	NUSAP1,CENPA,BARD1,MCM10,CDC7,AURKA,FBXO5,BRCA1,BUB1B,FEN1,RAE1,MIS18A,BIRC5,ECT2,GMNN,CCNE1,CCNE2,PRIM1,H2AZ1,RACGAP1,SMARCC1,CDK1,CDC25A,MAD2L1,AURKB
Mouse Phenotype	MP:0000352	decreased cell proliferation			1.341e-08	5.833e-05	1.944e-06	1.741e-05	55	883	SOX11,KIF18A,PTTG1,TGIF2,BRIP1,CENPF,PATZ1,DACH1,MCM2,MCM3,SRPK1,MCM4,DLK1,ACTL6A,CHEK1,EYA1,MCM10,EZH2,GINS1,CDC45,AURKA,CKS1B,CADM1,SALL1,BRCA1,BUB1,FEN1,KIF14,FGF8,COL2A1,RAD51,FOXM1,RAE1,RBBP4,MIS18A,CHD7,SIX1,GMNN,CCNA2,ZWINT,CCNE1,LMNB1,TIAM1,TPX2,H2AX,SMARCC1,CDK1,PRKDC,CDC20,CDC25A,TCF7L1,MAD2L1,CDK2,HDAC2,HELLS
Mouse Phenotype	MP:0006204	embryonic lethality before implantation			1.72e-08	7.483e-05	2.414e-06	2.162e-05	22	190	CDK8,PTTG1,ORC6,NASP,CHEK1,MCM10,RRM1,AURKA,FBXO5,FEN1,KIF11,RAD51,RBBP4,DTL,BIRC5,ECT2,CDCA8,GMNN,RACGAP1,CDK1,CDC20,PCNA
Mouse Phenotype	MP:0000534	abnormal ureter morphology			2.297e-08	9.992e-05	3.122e-06	2.796e-05	17	116	DLG5,ETV4,ETV5,EYA1,GFRA1,HOXA11,SALL2,SALL1,BRCA1,HOXD11,FOXC1,FOXD1,ITGA8,SIX1,LRP4,ROBO1,PAX2
Mouse Phenotype	MP:0010296	increased hemolymphoid system tumor incidence			4.447e-08	0.0001934	5.862e-06	5.249e-05	28	309	BRIP1,MCM2,MCM3,MCM4,MCM6,EZH2,BLM,AURKA,CKS1B,BRCA1,BUB1,BUB1B,FEN1,UNG,DNA2,PCBP4,TCF3,APEX1,MSH2,SUV39H2,MSH6,TPX2,EXO1,H2AX,ROBO1,PRKDC,CDC20,HDAC2
Mouse Phenotype	MP:0001146	abnormal testis morphology			6.767e-08	0.0002944	8.658e-06	7.753e-05	48	754	KIF18A,PTTG1,BRIP1,MAP2,PATZ1,PEG3,BARD1,ETV5,HMGB2,TRIP13,ELOVL2,CDC7,HOXA10,HOXA11,CKS2,SINHCAF,CADM1,BRCA1,BUB1,ASPM,TMEM97,HSF2,FOXC1,DNMT3A,VRK1,RBP1,WT1,APEX1,FANCL,E2F5,SKP2,CCNE1,HMGA2,ADGRG2,CCNE2,PAFAH1B3,EXO1,H2AX,TMF1,PAX2,CDK1,PRKDC,SNRPE,PLK4,PCNA,CDK2,HDAC2,HELLS
Mouse Phenotype	MP:0003861	abnormal nervous system development			7.236e-08	0.0003148	8.993e-06	8.053e-05	72	1372	CDK8,MYCN,SOX11,DLG5,PTTG1,TGIF2,CENPA,MAP2,CACNA2D2,MYO10,PATZ1,ZNF423,LAPTM4B,ETV1,BARD1,NCAM1,BRINP1,MARCKSL1,CHEK1,BCOR,MDK,EZH2,CHN1,GFRA1,HOXA1,HOXA2,FZD7,JARID2,CDK5R1,SALL2,SALL1,BRCA1,NRXN1,HOXD10,PGAP1,FEN1,ASPM,FGF8,ECEL1,WASF1,FOXC1,COL2A1,RANBP1,TCF3,FZD3,E2F5,CHD7,LMNB2,STIL,SIX1,NCAPH,EDN3,ARID3B,DNAAF2,TENM4,LMNB1,TIAM1,HEY1,SLIT1,UNC5C,DLL3,AUTS2,LRP4,SMARCC1,ROBO1,ELAVL4,NEIL3,P…
Mouse Phenotype	MP:0003942	abnormal urinary system development			8.191e-08	0.0003563	9.735e-06	8.718e-05	19	157	MYCN,ETV4,ETV5,EYA1,GFRA1,HOXA11,SALL2,SALL1,GPC3,HOXD11,FGF8,FOXC1,FOXD1,WT1,ITGA8,SIX1,LRP4,PAX2,SIX2
Mouse Phenotype	MP:0013503	abnormal embryonic tissue cell apoptosis			8.28e-08	0.0003602	9.735e-06	8.718e-05	21	190	NUSAP1,CHEK1,EYA1,MCM10,GINS1,HOXA11,SALL1,BRCA1,HOXD11,BUB1B,FGF8,RAD51,MIS18A,WT1,APEX1,ODC1,E2F8,DNAAF2,CDC20,MAD2L1,AURKB
Mouse Phenotype	MP:0001147	small testis			8.585e-08	0.0003734	9.827e-06	8.801e-05	40	573	KIF18A,PTTG1,BRIP1,MAP2,PATZ1,PEG3,BARD1,ETV5,TRIP13,ELOVL2,CDC7,HOXA10,HOXA11,CKS2,SINHCAF,CADM1,BRCA1,BUB1,ASPM,TMEM97,HSF2,FOXC1,DNMT3A,VRK1,WT1,FANCL,CCNE1,HMGA2,CCNE2,PAFAH1B3,EXO1,H2AX,TMF1,CDK1,SNRPE,PLK4,PCNA,CDK2,HDAC2,HELLS
Mouse Phenotype	MP:0011094	embryonic lethality before implantation, complete penetrance			1.357e-07	0.0005902	1.513e-05	0.0001355	19	162	CDK8,PTTG1,ORC6,NASP,CHEK1,RRM1,AURKA,FBXO5,FEN1,RAD51,DTL,BIRC5,ECT2,CDCA8,GMNN,RACGAP1,CDK1,CDC20,PCNA
Mouse Phenotype	MP:0000459	abnormal presacral vertebrae morphology			1.743e-07	0.000758	1.884e-05	0.0001687	23	234	SOX11,EYA1,HOXA5,HOXA6,HOXA10,HOXA11,HOXB9,HOXC4,HOXC6,HOXD1,HOXD4,HOXD10,HOXD11,PGAP1,DSCC1,FOXC1,COL2A1,CHD7,SIX1,TENM4,LMNB1,DLL3,HELLS
Mouse Phenotype	MP:0010985	abnormal kidney mesenchyme morphology			1.776e-07	0.0007725	1.884e-05	0.0001687	10	42	MYCN,EYA1,HOXA11,SALL1,HOXD11,FOXD1,WT1,LRP4,PAX2,SIX2
Mouse Phenotype	MP:0004849	abnormal testis size			1.871e-07	0.0008138	1.938e-05	0.0001735	41	613	KIF18A,PTTG1,BRIP1,MAP2,PATZ1,PEG3,BARD1,ETV5,TRIP13,ELOVL2,CDC7,HOXA10,HOXA11,CKS2,SINHCAF,CADM1,BRCA1,BUB1,ASPM,TMEM97,HSF2,FOXC1,DNMT3A,VRK1,WT1,FANCL,CCNE1,HMGA2,ADGRG2,CCNE2,PAFAH1B3,EXO1,H2AX,TMF1,CDK1,SNRPE,PLK4,PCNA,CDK2,HDAC2,HELLS
Mouse Phenotype	MP:0009760	abnormal mitotic spindle morphology			1.941e-07	0.0008443	1.964e-05	0.0001758	11	53	NUSAP1,KIF18A,PTTG1,EYA1,AURKA,FBXO5,BUB1,RAE1,BIRC5,TPX2,AURKB
Mouse Phenotype	MP:0004965	inner cell mass degeneration			2.089e-07	0.0009087	2.065e-05	0.0001849	9	33	CENPA,BARD1,CDC7,AURKA,FEN1,RAE1,MIS18A,BIRC5,MAD2L1
Mouse Phenotype	MP:0002209	decreased germ cell number			2.621e-07	0.00114	2.533e-05	0.0002269	37	529	KIF18A,BRIP1,MAP2,PATZ1,PEG3,BARD1,ETV5,HMMR,TRIP13,HOXA10,HOXA11,CKS2,CADM1,BRCA1,BUB1,BUB1B,ASPM,HSF2,FOXC1,DNMT3A,RANBP1,VRK1,FZD3,WT1,FANCL,HMGA2,ADGRG2,CCNE2,PAFAH1B3,EXO1,CDK1,PRKDC,PLK4,PCNA,CDK2,AURKB,HELLS
Mouse Phenotype	MP:0000480	increased rib number			2.898e-07	0.001261	2.74e-05	0.0002454	11	55	SOX11,HOXA5,HOXA6,HOXA10,HOXB9,HOXC4,GPC3,HOXD4,HOXD10,PGAP1,DSCC1
Mouse Phenotype	MP:0001116	small gonad			3.424e-07	0.001489	3.169e-05	0.0002838	41	627	KIF18A,PTTG1,BRIP1,MAP2,PATZ1,PEG3,BARD1,ETV5,TRIP13,ELOVL2,CDC7,HOXA10,HOXA11,CKS2,SINHCAF,CADM1,BRCA1,BUB1,ASPM,TMEM97,HSF2,FOXC1,DNMT3A,VRK1,WT1,FANCL,SUV39H2,CCNE1,HMGA2,CCNE2,PAFAH1B3,EXO1,H2AX,TMF1,CDK1,SNRPE,PLK4,PCNA,CDK2,HDAC2,HELLS
Mouse Phenotype	MP:0003722	absent ureter			3.597e-07	0.001565	3.26e-05	0.0002919	8	26	ETV4,ETV5,EYA1,GFRA1,SALL2,SALL1,ITGA8,PAX2
Mouse Phenotype	MP:0010984	abnormal metanephric mesenchyme morphology			6.102e-07	0.002655	5.417e-05	0.0004851	9	37	EYA1,HOXA11,SALL1,HOXD11,FOXD1,WT1,LRP4,PAX2,SIX2
Mouse Phenotype	MP:0002211	abnormal primary sex determination			7.211e-07	0.003137	6.273e-05	0.0005618	41	645	KIF18A,PTTG1,BRIP1,MAP2,PATZ1,PEG3,BARD1,ETV5,TRIP13,ELOVL2,CDC7,HOXA10,HOXA11,CKS2,SINHCAF,CADM1,BRCA1,BUB1,ASPM,TMEM97,HSF2,FOXC1,DNMT3A,VRK1,WT1,FANCL,SUV39H2,CCNE1,HMGA2,CCNE2,PAFAH1B3,EXO1,H2AX,TMF1,CDK1,SNRPE,PLK4,PCNA,CDK2,HDAC2,HELLS
Mouse Phenotype	MP:0009308	increased adenocarcinoma incidence			1.084e-06	0.004715	9.245e-05	0.0008279	19	185	BRIP1,BARD1,MCM4,CHEK1,BLM,BRCA1,BUB1B,FEN1,DNA2,PCBP4,MSH2,MSH6,HMGA2,TPX2,H2AX,ROBO1,MAD2L1,HDAC2,AURKB
Mouse Phenotype	MP:0002210	abnormal sex determination			1.111e-06	0.004832	9.292e-05	0.0008321	42	680	KIF18A,PTTG1,BRIP1,MAP2,PATZ1,PEG3,BARD1,ETV5,TRIP13,ELOVL2,CDC7,HOXA5,HOXA10,HOXA11,CKS2,SINHCAF,CADM1,BRCA1,BUB1,ASPM,TMEM97,HSF2,FOXC1,DNMT3A,VRK1,WT1,FANCL,SUV39H2,CCNE1,HMGA2,CCNE2,PAFAH1B3,EXO1,H2AX,TMF1,CDK1,SNRPE,PLK4,PCNA,CDK2,HDAC2,HELLS
Mouse Phenotype	MP:0002151	abnormal neural tube morphology			1.358e-06	0.005907	0.0001115	0.0009981	41	661	CDK8,MYCN,SOX11,PTTG1,TGIF2,CENPA,MYO10,PATZ1,LAPTM4B,BARD1,MARCKSL1,CHEK1,HOXA1,HOXA2,FZD7,JARID2,SALL2,SALL1,BRCA1,PGAP1,FEN1,FGF8,FOXC1,COL2A1,RANBP1,TCF3,FZD3,CHD7,STIL,SIX1,EDN3,ARID3B,DNAAF2,TENM4,HEY1,DLL3,SMARCC1,PAX2,FZD2,TMEM100,PLK4
Mouse Phenotype	MP:0013325	abnormal male reproductive gland morphology			1.457e-06	0.00634	0.0001174	0.001051	52	939	B3GALT2,KIF18A,PTTG1,BRIP1,MAP2,PATZ1,PEG3,BARD1,ETV5,HMGB2,TRIP13,ELOVL2,CDC7,HOXA10,HOXA11,CKS2,SINHCAF,CADM1,BRCA1,BUB1,ASPM,PLAG1,TMEM97,HSF2,FOXC1,DNMT3A,VRK1,NRTN,RBP1,WT1,APEX1,FANCL,E2F5,SKP2,CCNE1,HMGA2,ADGRG2,CCNE2,PAFAH1B3,EXO1,H2AX,TMF1,PAX2,CDK1,PRKDC,SNRPE,PLK4,PCNA,CDK2,HDAC2,MYB,HELLS
Mouse Phenotype	MP:0000527	abnormal kidney development			1.761e-06	0.007659	0.0001381	0.001237	15	123	MYCN,EYA1,GFRA1,HOXA11,SALL1,GPC3,HOXD11,FGF8,FOXC1,FOXD1,WT1,SIX1,LRP4,PAX2,SIX2
Mouse Phenotype	MP:0003604	single kidney			1.789e-06	0.007781	0.0001381	0.001237	10	53	EYA1,GFRA1,HOXA11,SALL2,SALL1,HOXD11,ITGA8,SIX1,LRP4,PAX2
Mouse Phenotype	MP:0001648	abnormal apoptosis			1.81e-06	0.007874	0.0001381	0.001237	71	1462	NUSAP1,MYCN,SOX11,KIF18A,TGIF2,BRIP1,CENPA,ETV5,MCM3,CHEK1,EYA1,MCM10,EZH2,GINS1,HOXA1,BLM,AURKA,HOXA11,SALL2,SALL1,GPC3,BRCA1,HOXD11,BUB1,BUB1B,FEN1,KIF14,FGF8,HSF2,FOXC1,NOVA1,COL2A1,RAD51,RANBP1,MIS18A,WT1,APEX1,BIRC5,CHD7,MSH2,ODC1,STIL,INPP5F,SIX1,SKP2,CDCA8,E2F8,ARID3B,DNAAF2,TENM4,TIAM1,TLE4,PAFAH1B3,EXO1,H2AX,SMARCC1,ELAVL4,PAX2,CDK1,PRKDC,CDC20,CDC25A,CDC25C,PLK4,SIX2,KDM1A,MAD2L1,CDK2,H…
Mouse Phenotype	MP:0000524	decreased renal tubule number			1.958e-06	0.008519	0.0001469	0.001315	5	9	ETV4,ETV5,HOXA11,HOXD11,SIX2
Mouse Phenotype	MP:0002989	small kidney			2.047e-06	0.008904	0.0001509	0.001351	23	269	B3GALT2,MYCN,PTTG1,ETV4,ETV5,EYA1,GFRA1,HOXA11,SALL2,SALL1,GPC3,HOXD10,HOXD11,FOXC1,FOXD1,WT1,ITGA8,SIX1,PAX2,PRKDC,SIX2,KDM1A,HELLS
Mouse Phenotype	MP:0003672	abnormal ureter development			2.167e-06	0.009424	0.0001571	0.001407	7	23	ETV4,ETV5,HOXA11,HOXD11,FOXC1,ITGA8,PAX2
Mouse Phenotype	MP:0013504	increased embryonic tissue cell apoptosis			2.313e-06	0.01006	0.000165	0.001477	17	159	CHEK1,EYA1,MCM10,HOXA11,SALL1,BRCA1,HOXD11,BUB1B,RAD51,MIS18A,WT1,APEX1,E2F8,DNAAF2,CDC20,MAD2L1,AURKB
Mouse Phenotype	MP:0001672	abnormal embryo development			2.662e-06	0.01158	0.0001868	0.001673	63	1254	CDK8,MYCN,SOX11,PTTG1,TGIF2,CENPA,ORC6,PEG10,BARD1,NASP,MCM4,HIC2,CHEK1,DBN1,MCM10,BCOR,RRM1,EZH2,GINS1,BLM,FZD7,AURKA,SALL1,FBXO5,BRCA1,PGAP1,BUB1B,FEN1,PRMT1,FGF8,KIF11,DNMT3A,COL2A1,RAD51,UBE2C,APEX1,BIRC5,CHD7,STIL,ECT2,CDCA8,GMNN,E2F8,CCNA2,ARID3B,CCNE1,DNAAF2,TENM4,HEY1,CCNE2,DLL3,TPX2,RACGAP1,CDK1,HAS2,CDC20,CDC25A,FZD2,TMEM100,PLK4,TCF7L1,KDM1A,CDK2
Mouse Phenotype	MP:0010983	abnormal ureteric bud invasion			2.979e-06	0.01296	0.0002057	0.001842	6	16	GFRA1,HOXA11,SALL1,HOXD11,ITGA8,LRP4
Mouse Phenotype	MP:0009205	abnormal internal male genitalia morphology			3.049e-06	0.01326	0.0002072	0.001856	53	989	B3GALT2,KIF18A,PTTG1,BRIP1,MAP2,PATZ1,PEG3,BARD1,ETV5,HMGB2,TRIP13,ELOVL2,CDC7,HOXA10,HOXA11,CKS2,SINHCAF,CADM1,BRCA1,HOXD11,BUB1,ASPM,PLAG1,TMEM97,HSF2,FOXC1,DNMT3A,VRK1,NRTN,RBP1,WT1,APEX1,FANCL,E2F5,SKP2,CCNE1,HMGA2,ADGRG2,CCNE2,PAFAH1B3,EXO1,H2AX,TMF1,PAX2,CDK1,PRKDC,SNRPE,PLK4,PCNA,CDK2,HDAC2,MYB,HELLS
Mouse Phenotype	MP:0004901	decreased male germ cell number			4.166e-06	0.01812	0.0002788	0.002497	32	476	KIF18A,BRIP1,MAP2,PATZ1,BARD1,ETV5,HOXA10,HOXA11,CKS2,CADM1,BRCA1,BUB1,BUB1B,ASPM,HSF2,DNMT3A,RANBP1,VRK1,FZD3,WT1,FANCL,HMGA2,ADGRG2,CCNE2,PAFAH1B3,EXO1,CDK1,PRKDC,PLK4,CDK2,AURKB,HELLS
Mouse Phenotype	MP:0002208	abnormal germ cell morphology			4.324e-06	0.01881	0.000285	0.002552	42	717	KIF18A,BRIP1,MAP2,PATZ1,PEG3,BARD1,ETV5,HMGB2,HMMR,TRIP13,ELOVL2,CDC7,HOXA10,HOXA11,CKS2,CADM1,BRCA1,BUB1,BUB1B,ASPM,HSF2,FOXC1,DNMT3A,RANBP1,VRK1,FZD3,WT1,FANCL,HMGA2,ADGRG2,CCNE2,PAFAH1B3,EXO1,TMF1,CDK1,PRKDC,CDC20,PLK4,PCNA,CDK2,AURKB,HELLS
Mouse Phenotype	MP:0009198	abnormal male genitalia morphology			5.82e-06	0.02532	0.0003723	0.003334	53	1011	B3GALT2,KIF18A,PTTG1,BRIP1,MAP2,PATZ1,PEG3,BARD1,ETV5,HMGB2,TRIP13,ELOVL2,CDC7,HOXA10,HOXA11,CKS2,SINHCAF,CADM1,BRCA1,HOXD11,BUB1,ASPM,PLAG1,TMEM97,HSF2,FOXC1,DNMT3A,VRK1,NRTN,RBP1,WT1,APEX1,FANCL,E2F5,SKP2,CCNE1,HMGA2,ADGRG2,CCNE2,PAFAH1B3,EXO1,H2AX,TMF1,PAX2,CDK1,PRKDC,SNRPE,PLK4,PCNA,CDK2,HDAC2,MYB,HELLS
Mouse Phenotype	MP:0001145	abnormal male reproductive system morphology			5.82e-06	0.02532	0.0003723	0.003334	53	1011	B3GALT2,KIF18A,PTTG1,BRIP1,MAP2,PATZ1,PEG3,BARD1,ETV5,HMGB2,TRIP13,ELOVL2,CDC7,HOXA10,HOXA11,CKS2,SINHCAF,CADM1,BRCA1,HOXD11,BUB1,ASPM,PLAG1,TMEM97,HSF2,FOXC1,DNMT3A,VRK1,NRTN,RBP1,WT1,APEX1,FANCL,E2F5,SKP2,CCNE1,HMGA2,ADGRG2,CCNE2,PAFAH1B3,EXO1,H2AX,TMF1,PAX2,CDK1,PRKDC,SNRPE,PLK4,PCNA,CDK2,HDAC2,MYB,HELLS
Mouse Phenotype	MP:0001930	abnormal meiosis			6.143e-06	0.02672	0.0003873	0.003468	20	227	KIF18A,BRIP1,MAP2,HMMR,TRIP13,TTK,CDC7,CKS2,BRCA1,HSF2,VRK1,SUV39H2,CCNE2,EXO1,H2AX,CDK1,CDC20,PCNA,CDK2,HELLS
Mouse Phenotype	MP:0009781	abnormal preimplantation embryo development			6.587e-06	0.02865	0.0004094	0.003666	13	104	CDK8,ORC6,CHEK1,AURKA,KIF11,BIRC5,ECT2,CDCA8,GMNN,RACGAP1,CDK1,CDC20,CDC25A
Mouse Phenotype	MP:0009762	abnormal mitotic spindle assembly checkpoint			6.854e-06	0.02982	0.0004141	0.003709	5	11	KIF18A,BUB1,BUB1B,TPX2,MAD2L1
Mouse Phenotype	MP:0011366	absent metanephros			6.854e-06	0.02982	0.0004141	0.003709	5	11	HOXA11,HOXD11,WT1,SIX1,PAX2
Mouse Phenotype	MP:0000313	abnormal cell death			6.968e-06	0.03031	0.0004152	0.003718	81	1809	NUSAP1,MYCN,SOX11,KIF18A,PTTG1,TGIF2,BRIP1,CENPA,ORC6,ATP8A2,BARD1,ETV5,MCM3,CHEK1,EYA1,MCM10,EZH2,GINS1,GFRA1,HOXA1,BLM,AURKA,HOXA11,JARID2,SALL2,SALL1,GPC3,BRCA1,HOXD11,BUB1,RAD54B,BUB1B,FEN1,KIF14,FGF8,UNG,HSF2,FOXC1,NOVA1,COL2A1,RAD51,FOXM1,RANBP1,TCF3,MIS18A,WT1,APEX1,BIRC5,CHD7,MSH2,ODC1,STIL,INPP5F,SIX1,SKP2,CDCA8,E2F8,ARID3B,DNAAF2,TENM4,TIAM1,TLE4,PAFAH1B3,EXO1,H2AX,SMARCC1,ELAVL4,PAX2,C…
Mouse Phenotype	MP:0013707	abnormal hematopoietic precursor cell morphology			7.069e-06	0.03075	0.0004156	0.003721	27	375	MYCN,PCLAF,MCM3,HMGB3,ACTL6A,EZH2,MEIS1,JARID2,GPC3,DHFR,BUB1B,SAC3D1,DNMT3A,TCF3,GMNN,CCNA2,ARID3B,CCNE1,TLE4,RACGAP1,SMARCC1,TMPO,PRKDC,KDM1A,CDK2,HDAC2,MYB
Mouse Phenotype	MP:0001052	abnormal innervation pattern to muscle			7.488e-06	0.03257	0.0004343	0.00389	9	49	SOX11,ETV1,ETV4,CHRNA1,GFRA1,ECEL1,LMNB2,LMNB1,UNC5C
Mouse Phenotype	MP:0000653	abnormal sex gland morphology			8.15e-06	0.03545	0.0004665	0.004178	56	1104	B3GALT2,KIF18A,PTTG1,BRIP1,MAP2,CACNA2D2,PATZ1,PEG3,BARD1,ETV5,HMGB2,HMMR,TRIP13,ELOVL2,CDC7,HOXA5,HOXA10,HOXA11,CKS2,SINHCAF,CADM1,BRCA1,BUB1,ASPM,PLAG1,TMEM97,HSF2,FOXC1,DNMT3A,VRK1,NRTN,RBP1,WT1,APEX1,FANCL,E2F5,SKP2,CCNE1,HMGA2,ADGRG2,CCNE2,PAFAH1B3,EXO1,H2AX,TMF1,ROBO1,PAX2,CDK1,PRKDC,SNRPE,PLK4,PCNA,CDK2,HDAC2,MYB,HELLS
Mouse Phenotype	MP:0003047	abnormal thoracic vertebrae morphology			8.836e-06	0.03844	0.0004992	0.00447	14	123	HOXA5,HOXA6,HOXA10,HOXA11,HOXB9,HOXC4,HOXC6,HOXD11,PGAP1,DSCC1,TENM4,LMNB1,DLL3,HELLS
Mouse Phenotype	MP:0004966	abnormal inner cell mass proliferation			9.326e-06	0.04057	0.0005184	0.004642	11	77	CENPE,MCM4,CHEK1,EZH2,GINS1,CDC45,RAD51,RBBP4,MIS18A,ZWINT,MAD2L1
Mouse Phenotype	MP:0002058	neonatal lethality			9.414e-06	0.04095	0.0005184	0.004642	53	1028	MYCN,SOX11,KDM5B,DACH1,ETV4,ETV5,DLK1,EYA1,EZH2,CHRNA1,GFRA1,MEX3C,HOXA1,MEOX1,HOXA2,HOXA5,HOXA11,SALL1,GPC3,BRCA1,NRXN1,HOXD11,BUB1B,FEN1,FGF8,ECEL1,FOXC1,FOXD1,COL2A1,FOXM1,TCF3,FZD3,NSD2,SH3GL3,WT1,CITED1,CHD7,LMNB2,SIX1,E2F8,LMNB1,ZNF516,AUTS2,LRP4,ROBO1,ELAVL4,PAX2,FZD2,TCF7L1,SIX2,CDK2,HDAC2,HELLS
Mouse Phenotype	MP:0001156	abnormal spermatogenesis			1.065e-05	0.04631	0.0005789	0.005184	40	693	KIF18A,BRIP1,MAP2,PATZ1,BARD1,ETV5,HMGB2,TRIP13,ELOVL2,CDC7,HOXA10,HOXA11,CKS2,CADM1,BRCA1,BUB1,BUB1B,ASPM,HSF2,DNMT3A,RANBP1,VRK1,FZD3,WT1,FANCL,SUV39H2,HMGA2,ADGRG2,CCNE2,PAFAH1B3,EXO1,H2AX,TMF1,CDK1,PRKDC,SNRPE,PCNA,CDK2,AURKB,HELLS
Mouse Phenotype	MP:0001929	abnormal gametogenesis			1.145e-05	0.04979	0.0006147	0.005505	46	849	KIF18A,BRIP1,MAP2,PATZ1,PEG3,BARD1,ETV5,HMGB2,HMMR,TRIP13,TTK,ELOVL2,CDC7,HOXA10,HOXA11,CKS2,CADM1,BRCA1,BUB1,BUB1B,ASPM,HSF2,FOXC1,DNMT3A,RANBP1,VRK1,FZD3,WT1,FANCL,SUV39H2,HMGA2,ADGRG2,CCNE2,PAFAH1B3,EXO1,H2AX,TMF1,CDK1,PRKDC,CDC20,SNRPE,PLK4,PCNA,CDK2,AURKB,HELLS
Mouse Phenotype	MP:0002038	increased carcinoma incidence			1.181e-05	0.05137	0.0006251	0.005598	24	320	BRIP1,BARD1,MCM4,CHEK1,BLM,AURKA,BRCA1,BUB1,BUB1B,FEN1,DNA2,PCBP4,FOXM1,APEX1,MSH2,MSH6,HMGA2,TIAM1,TPX2,H2AX,ROBO1,MAD2L1,HDAC2,AURKB
Mouse Phenotype	MP:0011364	abnormal metanephros morphology			1.193e-05	0.05189	0.0006251	0.005598	7	29	HOXA11,HOXD11,FOXC1,WT1,SIX1,PAX2,SIX2
Mouse Phenotype	MP:0000358	abnormal cell morphology			1.317e-05	0.0573	0.0006822	0.006109	66	1402	KIF18A,PTTG1,BRIP1,CENPA,MAP2,PATZ1,PEG3,BARD1,ETV5,MCM2,HMGB2,MCM4,CHEK1,HMMR,TRIP13,TTK,ELOVL2,GFRA1,CDC7,BLM,AURKA,HOXA10,HOXA11,CKS2,CADM1,BRCA1,BUB1,BUB1B,FEN1,ASPM,HSF2,DNA2,FOXC1,DNMT3A,RANBP1,VRK1,FZD3,WT1,BIRC5,FANCL,CHD7,NCAPH,CDCA8,GMNN,CCNE1,DNAAF2,HMGA2,LMNB1,ADGRG2,CCNE2,PAFAH1B3,ZNF516,TPX2,EXO1,TMF1,CDK1,PRKDC,CDC20,CDC25A,PLK4,MAD2L1,PCNA,CDK2,HDAC2,AURKB,HELLS
Mouse Phenotype	MP:0008057	abnormal DNA replication			1.519e-05	0.06606	0.0007703	0.006898	7	30	BRIP1,BARD1,MCM3,CHEK1,CDC7,FEN1,CDK1
Mouse Phenotype	MP:0008027	abnormal spinal cord white matter morphology			1.523e-05	0.06625	0.0007703	0.006898	8	41	CACNA2D2,ATP8A2,CHN1,UCHL1,TENM4,SLIT1,UNC5C,ROBO1
Mouse Phenotype	MP:0011086	postnatal lethality, incomplete penetrance			1.703e-05	0.07407	0.0008514	0.007624	45	836	MYCN,CDO1,CACNA2D2,ZNF423,PEG3,ETV5,MCM2,MCM3,MCM4,MCM6,MCM7,BRINP1,TRIP13,CDC7,HOXA1,HOXA5,FZD7,HOXA11,MEST,HOXC4,GPC3,HOXD4,NRXN1,HOXD11,FGF8,HSF2,COL2A1,TCF3,WT1,CHD7,EDN3,DNAAF2,TIA1,HEY1,DLL3,LRP4,PAX2,PRKDC,CDC25A,CDC25C,FZD2,KDM1A,MAD2L1,HDAC2,HELLS
Mouse Phenotype	MP:0004815	abnormal somatic hypermutation frequency			1.792e-05	0.07796	0.0008618	0.007718	6	21	BACH2,HOXC4,UNG,MSH2,EXO1,PCNA
Mouse Phenotype	MP:0010982	abnormal ureteric bud elongation			1.792e-05	0.07796	0.0008618	0.007718	6	21	GFRA1,HOXA11,SALL1,HOXD11,ITGA8,LRP4
Mouse Phenotype	MP:0008755	abnormal immunoglobulin V(D)J recombination			1.792e-05	0.07796	0.0008618	0.007718	6	21	EZH2,TCF3,SKP2,EXO1,SMARCC1,PRKDC
Mouse Phenotype	MP:0010978	absent ureteric bud			1.823e-05	0.07929	0.0008618	0.007718	5	13	EYA1,GFRA1,HOXA11,HOXD11,PAX2
Mouse Phenotype	MP:0004922	abnormal common crus morphology			1.823e-05	0.07929	0.0008618	0.007718	5	13	EYA1,HOXA1,CHD7,SIX1,PAX2
Mouse Phenotype	MP:0006362	abnormal male germ cell morphology			1.913e-05	0.08321	0.0008861	0.007935	37	635	KIF18A,BRIP1,MAP2,PATZ1,BARD1,ETV5,HMGB2,ELOVL2,CDC7,HOXA10,HOXA11,CKS2,CADM1,BRCA1,BUB1,BUB1B,ASPM,HSF2,DNMT3A,RANBP1,VRK1,FZD3,WT1,FANCL,HMGA2,ADGRG2,CCNE2,PAFAH1B3,EXO1,TMF1,CDK1,PRKDC,CDC20,PLK4,CDK2,AURKB,HELLS
Mouse Phenotype	MP:0002823	abnormal rib development			1.915e-05	0.08329	0.0008861	0.007935	7	31	MEOX1,HOXA5,HOXA10,HOXB9,HOXC4,HOXD10,FOXC1
Mouse Phenotype	MP:0003166	decreased superior semicircular canal size			2.01e-05	0.08744	0.0009204	0.008243	4	7	EYA1,CHD7,SIX1,PAX2
Mouse Phenotype	MP:0011087	neonatal lethality, complete penetrance			2.351e-05	0.1023	0.001066	0.009542	40	717	MYCN,SOX11,DACH1,ETV4,ETV5,EYA1,EZH2,GFRA1,HOXA1,MEOX1,HOXA2,SALL1,GPC3,BRCA1,NRXN1,BUB1B,FEN1,FGF8,ECEL1,FOXC1,FOXD1,COL2A1,FZD3,SH3GL3,WT1,CHD7,LMNB2,SIX1,LMNB1,ZNF516,AUTS2,LRP4,ROBO1,ELAVL4,PAX2,TCF7L1,SIX2,CDK2,HDAC2,HELLS
Mouse Phenotype	MP:0002081	perinatal lethality			2.483e-05	0.108	0.001114	0.009973	65	1401	MYCN,SOX11,KDM5B,MAP2,DACH1,ETV4,ETV5,MCM3,DLK1,EYA1,EZH2,CHRNA1,GFRA1,MEX3C,HOXA1,MEOX1,HOXA2,HOXA5,HOXA11,JARID2,MEST,CDK5R1,SALL2,SALL1,GPC3,BRCA1,NRXN1,HOXD11,PGAP1,BUB1,BUB1B,FEN1,FGF8,MACROH2A2,ECEL1,FOXC1,FOXD1,COL2A1,FOXM1,TCF3,RNASEH2A,FZD3,NSD2,SH3GL3,WT1,CITED1,CHD7,LMNB2,SIX1,E2F8,LMNB1,SLIT1,ZNF516,AUTS2,LRP4,ROBO1,ELAVL4,PAX2,FZD2,TCF7L1,SIX2,CDK2,HDAC2,MYB,HELLS
Mouse Phenotype	MP:0000150	abnormal rib morphology			2.565e-05	0.1116	0.001138	0.01019	22	292	SOX11,DLK1,EYA1,DBN1,MEOX1,HOXA5,HOXA6,HOXA7,HOXA10,HOXA11,HOXB9,HOXC4,HOXC6,GPC3,HOXD4,HOXD10,PGAP1,DSCC1,FOXC1,COL2A1,SIX1,DLL3
Mouse Phenotype	MP:0002161	abnormal fertility/fecundity			2.705e-05	0.1177	0.001172	0.0105	72	1608	KIF18A,CDO1,KDM5B,PTTG1,TGIF2,BRIP1,CLGN,MAP2,CACNA2D2,PATZ1,DLGAP5,BARD1,ETV4,ETV5,HMGB2,CA14,DLK1,MARCKSL1,HMMR,EYA1,MDK,TRIP13,TTK,ELOVL2,HOXA10,HOXA11,CKS2,CADM1,BRCA1,HOXD4,HOXD10,HOXD11,PGAP1,BUB1,BUB1B,ASPM,PLAG1,MACROH2A2,HSF2,DNMT3A,RANBP1,TCF3,VRK1,RNASEH2A,FZD3,WT1,FANCL,E2F5,CHD7,SUV39H2,GMNN,CCNE1,TBC1D8,HMGA2,ADGRG2,CCNB2,CCNE2,UNC5C,PAFAH1B3,DLL3,EXO1,LRP4,TMF1,ELAVL4,PAX2,CDK1,PRK…
Mouse Phenotype	MP:0004045	abnormal cell cycle checkpoint function			2.706e-05	0.1177	0.001172	0.0105	10	71	KIF18A,PTTG1,CHEK1,BRCA1,BUB1,BUB1B,RAE1,TPX2,CDC25A,MAD2L1
Mouse Phenotype	MP:0002160	abnormal reproductive system morphology			2.721e-05	0.1184	0.001172	0.0105	71	1579	B3GALT2,KIF18A,KDM5B,PTTG1,BRIP1,MAP2,CACNA2D2,PATZ1,PEG3,BARD1,ETV5,HMGB2,HMMR,TRIP13,TTK,ELOVL2,CDC7,HOXA5,HOXA10,HOXA11,CKS2,SINHCAF,CADM1,GPC3,BRCA1,HOXD11,BUB1,BUB1B,FEN1,ASPM,PLAG1,FGF8,TMEM97,HSF2,FOXC1,DNMT3A,RANBP1,VRK1,NRTN,FZD3,RBP1,WT1,APEX1,FANCL,E2F5,CHD7,MSH2,SKP2,SUV39H2,CCNE1,MSH6,HMGA2,ADGRG2,CCNE2,PAFAH1B3,EXO1,H2AX,TMF1,ROBO1,PAX2,CDK1,PRKDC,CDC20,SNRPE,PLK4,PCNA,CDK2,HDAC2,MY…
Mouse Phenotype	MP:0003446	renal hypoplasia			3.066e-05	0.1334	0.001308	0.01171	10	72	ETV4,ETV5,EYA1,HOXA11,SALL1,HOXD11,FOXC1,SIX1,PAX2,SIX2
Mouse Phenotype	MP:0004618	thoracic vertebral transformation			3.108e-05	0.1352	0.001313	0.01176	9	58	HOXA5,HOXA6,HOXA10,HOXA11,HOXB9,HOXC4,HOXC6,HOXD11,PGAP1
Mouse Phenotype	MP:0010273	increased classified tumor incidence			3.421e-05	0.1488	0.001431	0.01281	35	602	BRIP1,BARD1,MCM2,MCM3,MCM4,MCM6,CHEK1,EZH2,BLM,AURKA,CKS1B,BRCA1,BUB1,BUB1B,FEN1,UNG,DNA2,PCBP4,FOXM1,TCF3,APEX1,MSH2,SUV39H2,MSH6,HMGA2,TIAM1,TPX2,EXO1,H2AX,ROBO1,PRKDC,CDC20,MAD2L1,HDAC2,AURKB
Mouse Phenotype	MP:0012113	decreased inner cell mass proliferation			3.465e-05	0.1507	0.001436	0.01286	10	73	MCM4,CHEK1,EZH2,GINS1,CDC45,RAD51,RBBP4,MIS18A,ZWINT,MAD2L1
Mouse Phenotype	MP:0003626	kidney medulla hypoplasia			3.931e-05	0.171	0.001613	0.01445	4	8	HOXA11,HOXD11,WT1,PAX2
Mouse Phenotype	MP:0006410	abnormal common myeloid progenitor cell morphology			4.201e-05	0.1827	0.001708	0.01529	14	141	PCLAF,HMGB3,ACTL6A,MEIS1,DHFR,BUB1B,SAC3D1,DNMT3A,GMNN,CCNA2,TLE4,KDM1A,CDK2,MYB
Mouse Phenotype	MP:0004028	chromosome breakage			4.399e-05	0.1914	0.001772	0.01587	10	75	BRIP1,BARD1,MCM4,BLM,BRCA1,BUB1B,FEN1,CCNE1,H2AX,MAD2L1
Mouse Phenotype	MP:0020188	abnormal classified tumor incidence			4.49e-05	0.1953	0.001792	0.01605	35	610	BRIP1,BARD1,MCM2,MCM3,MCM4,MCM6,CHEK1,EZH2,BLM,AURKA,CKS1B,BRCA1,BUB1,BUB1B,FEN1,UNG,DNA2,PCBP4,FOXM1,TCF3,APEX1,MSH2,SUV39H2,MSH6,HMGA2,TIAM1,TPX2,EXO1,H2AX,ROBO1,PRKDC,CDC20,MAD2L1,HDAC2,AURKB
Mouse Phenotype	MP:0004197	abnormal fetal growth/weight/body size			5.449e-05	0.237	0.002155	0.0193	23	329	MYCN,PATZ1,MCM3,MCM4,DLK1,JARID2,MEST,CADM1,PGAP1,DHFR,BUB1,FGF8,MACROH2A2,FOXC1,NOVA1,COL2A1,RNASEH2A,NSD2,CITED1,LMNB2,E2F8,LMNB1,HELLS
Mouse Phenotype	MP:0008007	abnormal cellular replicative senescence			5.706e-05	0.2482	0.002236	0.02002	11	93	BRIP1,PATZ1,SRPK1,CKS1B,BRCA1,BUB1,BUB1B,PCBP4,RAE1,CDK1,HDAC2
Mouse Phenotype	MP:0002018	increased malignant tumor incidence			5.856e-05	0.2547	0.002274	0.02037	26	399	BRIP1,BARD1,MCM4,CHEK1,EZH2,BLM,AURKA,BRCA1,BUB1,BUB1B,FEN1,DNA2,PCBP4,FOXM1,APEX1,MSH2,MSH6,HMGA2,TIAM1,TPX2,EXO1,H2AX,ROBO1,MAD2L1,HDAC2,AURKB
Mouse Phenotype	MP:0004322	abnormal sternebra morphology			6.107e-05	0.2657	0.002351	0.02105	9	63	SOX11,HOXA5,HOXA6,HOXA10,HOXB9,HOXC4,HOXC6,FOXC1,DLL3
Mouse Phenotype	MP:0001155	arrest of spermatogenesis			6.498e-05	0.2827	0.00248	0.0222	18	225	KIF18A,MAP2,PATZ1,BARD1,TRIP13,ELOVL2,CDC7,CKS2,CADM1,BRCA1,HSF2,VRK1,SUV39H2,PAFAH1B3,H2AX,CDK1,PCNA,HELLS
Mouse Phenotype	MP:0004624	abnormal thoracic cage morphology			6.574e-05	0.2859	0.002487	0.02227	28	449	SOX11,DLK1,EYA1,DBN1,MEOX1,HOXA5,HOXA6,HOXA7,HOXA10,HOXA11,JARID2,HOXB9,HOXC4,HOXC6,GPC3,HOXD4,HOXD10,HOXD11,PGAP1,DSCC1,FOXC1,COL2A1,NSD2,SIX1,TENM4,LMNB1,DLL3,HELLS
Mouse Phenotype	MP:0003049	abnormal lumbar vertebrae morphology			6.756e-05	0.2939	0.002513	0.02251	13	129	SOX11,HOXA5,HOXA10,HOXA11,HOXB9,HOXD10,HOXD11,PGAP1,DSCC1,COL2A1,CHD7,TENM4,DLL3
Mouse Phenotype	MP:0012114	absent inner cell mass proliferation			6.868e-05	0.2987	0.002513	0.02251	8	50	MCM4,CHEK1,EZH2,GINS1,CDC45,RAD51,RBBP4,MAD2L1
Mouse Phenotype	MP:0003164	decreased posterior semicircular canal size			6.919e-05	0.301	0.002513	0.02251	4	9	EYA1,CHD7,SIX1,PAX2
Mouse Phenotype	MP:0009797	abnormal mismatch repair			6.919e-05	0.301	0.002513	0.02251	4	9	UNG,MSH2,MSH6,EXO1
Mouse Phenotype	MP:0000159	abnormal xiphoid process morphology			6.933e-05	0.3016	0.002513	0.02251	9	64	SOX11,HOXA5,HOXA6,HOXA10,HOXC4,HOXC6,GPC3,FOXC1,SIX1
Mouse Phenotype	MP:0001919	abnormal reproductive system physiology			7.63e-05	0.3319	0.002721	0.02437	77	1809	KIF18A,CDO1,KDM5B,PTTG1,TGIF2,BRIP1,CLGN,MAP2,CACNA2D2,PATZ1,DLGAP5,BARD1,ETV4,ETV5,HMGB2,CA14,DLK1,MARCKSL1,CHEK1,HMMR,EYA1,MDK,TRIP13,TTK,ELOVL2,HOXA5,HOXA10,HOXA11,CKS2,CADM1,BRCA1,HOXD4,HOXD10,HOXD11,PGAP1,BUB1,BUB1B,ASPM,PLAG1,PRMT1,MACROH2A2,HSF2,FOXC1,KIF11,DNMT3A,RANBP1,TCF3,VRK1,RNASEH2A,FZD3,WT1,FANCL,E2F5,CHD7,SUV39H2,GMNN,CCNE1,TBC1D8,HMGA2,ADGRG2,CCNB2,CCNE2,UNC5C,PAFAH1B3,DLL3,EXO1,…
Mouse Phenotype	MP:0002673	abnormal sperm number			7.668e-05	0.3336	0.002721	0.02437	28	453	BRIP1,MAP2,PATZ1,ETV5,HOXA10,HOXA11,CKS2,CADM1,BRCA1,BUB1,BUB1B,ASPM,HSF2,DNMT3A,RANBP1,VRK1,FZD3,WT1,FANCL,HMGA2,ADGRG2,CCNE2,PAFAH1B3,EXO1,CDK1,PRKDC,CDK2,AURKB
Mouse Phenotype	MP:0010274	increased organ/body region tumor incidence			7.694e-05	0.3347	0.002721	0.02437	36	652	BRIP1,BARD1,ETV4,MCM2,MCM3,MCM4,MCM6,CHEK1,EZH2,BLM,AURKA,CKS1B,BRCA1,BUB1,BUB1B,FEN1,UNG,DNA2,PCBP4,FOXM1,TCF3,WT1,APEX1,MSH2,SUV39H2,MSH6,HMGA2,TPX2,EXO1,H2AX,ROBO1,PRKDC,CDC20,MAD2L1,HDAC2,AURKB
Mouse Phenotype	MP:0004806	absent germ cells			8.163e-05	0.3551	0.002864	0.02564	18	229	MAP2,PATZ1,ETV5,HOXA10,HOXA11,CKS2,BRCA1,HSF2,DNMT3A,RANBP1,VRK1,WT1,FANCL,HMGA2,PAFAH1B3,CDK1,PCNA,CDK2
Mouse Phenotype	MP:0008813	decreased common myeloid progenitor cell number			8.871e-05	0.3859	0.003078	0.02757	9	66	PCLAF,ACTL6A,MEIS1,DHFR,BUB1B,CCNA2,TLE4,KDM1A,MYB
Mouse Phenotype	MP:0002932	abnormal joint morphology			8.917e-05	0.3879	0.003078	0.02757	27	433	MYCN,SOX11,PFAS,DLK1,EYA1,MEOX1,HOXA2,HOXA5,HOXA6,HOXA10,HOXB9,HOXC4,HOXC6,GPC3,HOXD1,HOXD4,HOXD10,DSCC1,FOXC1,COL2A1,SLC25A21,CHD7,SIX1,TENM4,LMNB1,DLL3,HAS2
Mouse Phenotype	MP:0005169	abnormal male meiosis			9.049e-05	0.3936	0.003099	0.02776	16	190	KIF18A,BRIP1,MAP2,TRIP13,CDC7,CKS2,BRCA1,HSF2,VRK1,SUV39H2,CCNE2,EXO1,H2AX,CDK1,CDK2,HELLS
Mouse Phenotype	MP:0002166	altered tumor susceptibility			9.646e-05	0.4196	0.003278	0.02936	45	898	BRIP1,BARD1,ETV4,MCM2,MCM3,MCM4,MCM6,CHEK1,HMMR,EZH2,BLM,AURKA,CKS1B,BRCA1,BUB1,BUB1B,FEN1,UNG,DNA2,PCBP4,FOXM1,TCF3,RAE1,WT1,APEX1,MSH2,SUV39H2,CCNE1,MSH6,IGF2BP2,HMGA2,TIAM1,TPX2,EXO1,AUTS2,H2AX,ROBO1,CDK1,PRKDC,CDC20,CDC25A,MAD2L1,CDK2,HDAC2,AURKB
Mouse Phenotype	MP:0012556	increased cell death			0.0001004	0.4368	0.003386	0.03032	51	1065	MYCN,SOX11,KIF18A,TGIF2,ORC6,MCM3,CHEK1,EYA1,MCM10,EZH2,HOXA1,AURKA,HOXA11,SALL2,SALL1,BRCA1,HOXD11,BUB1B,FEN1,KIF14,FGF8,NOVA1,COL2A1,RAD51,MIS18A,WT1,APEX1,BIRC5,CHD7,INPP5F,SIX1,SKP2,CDCA8,E2F8,ARID3B,DNAAF2,TLE4,H2AX,SMARCC1,ELAVL4,PAX2,CDK1,PRKDC,CDC20,CDC25A,CDC25C,KDM1A,MAD2L1,HDAC2,AURKB,HELLS
Mouse Phenotype	MP:0003693	abnormal blastocyst hatching			0.0001054	0.4584	0.003526	0.03158	8	53	ORC6,CHEK1,AURKA,KIF11,BIRC5,ECT2,CDCA8,CDC25A
Mouse Phenotype	MP:0001077	abnormal spinal nerve morphology			0.000108	0.4697	0.003569	0.03196	13	135	CACNA2D2,ETV1,CHN1,GFRA1,MEOX1,HOXA10,HOXD10,ECEL1,LMNB2,LMNB1,UNC5C,DLL3,LRP4
Mouse Phenotype	MP:0004625	abnormal rib joint morphology			0.0001083	0.4711	0.003569	0.03196	12	117	SOX11,DLK1,EYA1,HOXA5,HOXA6,HOXA10,HOXB9,HOXC4,HOXC6,GPC3,FOXC1,SIX1
Mouse Phenotype	MP:0009937	abnormal neuron differentiation			0.0001102	0.4794	0.003604	0.03228	25	391	MYCN,SOX11,DLG5,ETV1,NCAM1,BRINP1,EZH2,CHN1,HOXA1,HOXA2,CDK5R1,HOXD10,ECEL1,FOXC1,RANBP1,LMNB2,LMNB1,SLIT1,UNC5C,AUTS2,LRP4,ROBO1,ELAVL4,NEIL3,PAX2
Mouse Phenotype	MP:0012167	abnormal epigenetic regulation of gene expression			0.0001113	0.4843	0.003614	0.03236	11	100	PEG10,PEG3,DLK1,MEST,GPC3,DHFR,DNMT3A,MIS18A,CITED1,CHD7,HELLS
Mouse Phenotype	MP:0004315	absent vestibular saccule			0.0001128	0.4906	0.003634	0.03254	4	10	EYA1,HOXA1,CHD7,PAX2
Mouse Phenotype	MP:0001924	infertility			0.0001156	0.5028	0.003697	0.03311	50	1043	KIF18A,CDO1,KDM5B,CLGN,MAP2,CACNA2D2,PATZ1,DLGAP5,BARD1,ETV4,ETV5,CA14,EYA1,MDK,TRIP13,ELOVL2,HOXA10,HOXA11,CKS2,CADM1,BRCA1,HOXD4,HOXD10,HOXD11,PGAP1,BUB1,BUB1B,HSF2,DNMT3A,RANBP1,TCF3,VRK1,RNASEH2A,WT1,FANCL,E2F5,SUV39H2,TBC1D8,HMGA2,CCNE2,UNC5C,PAFAH1B3,EXO1,TMF1,CDK1,PRKDC,CDC20,PCNA,CDK2,HELLS
Mouse Phenotype	MP:0004808	abnormal hematopoietic stem cell morphology			0.0001228	0.5343	0.0039	0.03492	15	175	MYCN,PCLAF,MCM3,ACTL6A,MEIS1,GPC3,DNMT3A,TCF3,GMNN,CCNA2,TLE4,PRKDC,KDM1A,CDK2,MYB
Mouse Phenotype	MP:0002019	abnormal tumor incidence			0.0001323	0.5753	0.004169	0.03733	44	883	BRIP1,BARD1,ETV4,MCM2,MCM3,MCM4,MCM6,CHEK1,HMMR,EZH2,BLM,AURKA,CKS1B,BRCA1,BUB1,BUB1B,FEN1,UNG,DNA2,PCBP4,FOXM1,TCF3,RAE1,WT1,APEX1,MSH2,SUV39H2,MSH6,IGF2BP2,HMGA2,TIAM1,TPX2,EXO1,AUTS2,H2AX,ROBO1,CDK1,PRKDC,CDC20,CDC25A,MAD2L1,CDK2,HDAC2,AURKB
Mouse Phenotype	MP:0000154	rib fusion			0.0001332	0.5795	0.004169	0.03734	11	102	DLK1,EYA1,MEOX1,HOXA5,HOXA6,HOXA7,HOXB9,HOXC6,GPC3,SIX1,DLL3
Mouse Phenotype	MP:0002123	abnormal definitive hematopoiesis			0.0001379	0.5999	0.004285	0.03838	47	967	PCLAF,PATZ1,BACH2,MCM3,HMGB3,MCM4,PFAS,DLK1,ACTL6A,EZH2,MEIS1,STAT4,BLM,JARID2,HOXC4,CADM1,BRCA1,DHFR,BUB1B,FEN1,SAC3D1,UNG,DNMT3A,TCF3,BIRC5,MSH2,SKP2,GMNN,CCNA2,ARID3B,CCNE1,YEATS4,CCNB2,CCNE2,TLE4,EXO1,H2AX,RACGAP1,SMARCC1,PRKDC,CDC25A,KDM1A,PCNA,CDK2,HDAC2,MYB,HELLS
Mouse Phenotype	MP:0013152	abnormal organ/body region tumor incidence			0.0001456	0.6332	0.004491	0.04022	36	673	BRIP1,BARD1,ETV4,MCM2,MCM3,MCM4,MCM6,CHEK1,EZH2,BLM,AURKA,CKS1B,BRCA1,BUB1,BUB1B,FEN1,UNG,DNA2,PCBP4,FOXM1,TCF3,WT1,APEX1,MSH2,SUV39H2,MSH6,HMGA2,TPX2,EXO1,H2AX,ROBO1,PRKDC,CDC20,MAD2L1,HDAC2,AURKB
Mouse Phenotype	MP:0004200	decreased fetal size			0.0001563	0.68	0.004788	0.04288	18	241	MYCN,PATZ1,MCM3,MEST,CADM1,PGAP1,DHFR,BUB1,MACROH2A2,FOXC1,NOVA1,COL2A1,RNASEH2A,NSD2,CITED1,LMNB2,LMNB1,HELLS
Mouse Phenotype	MP:0002020	increased tumor incidence			0.0001716	0.7466	0.005199	0.04656	39	758	BRIP1,BARD1,ETV4,MCM2,MCM3,MCM4,MCM6,CHEK1,EZH2,BLM,AURKA,CKS1B,BRCA1,BUB1,BUB1B,FEN1,UNG,DNA2,PCBP4,FOXM1,TCF3,RAE1,WT1,APEX1,MSH2,SUV39H2,MSH6,HMGA2,TIAM1,TPX2,EXO1,H2AX,ROBO1,PRKDC,CDC20,CDC25A,MAD2L1,HDAC2,AURKB
Mouse Phenotype	MP:0001124	abnormal gametes			0.0001725	0.7504	0.005199	0.04656	31	550	BRIP1,MAP2,PATZ1,ETV5,HMGB2,ELOVL2,HOXA10,HOXA11,CKS2,CADM1,BRCA1,BUB1,BUB1B,ASPM,HSF2,DNMT3A,RANBP1,VRK1,FZD3,WT1,FANCL,HMGA2,ADGRG2,CCNE2,PAFAH1B3,EXO1,TMF1,CDK1,PRKDC,CDK2,AURKB
Mouse Phenotype	MP:0009728	abnormal calcaneum morphology			0.0001733	0.7538	0.005199	0.04656	4	11	SOX11,HOXA11,GPC3,HOXD11
Mouse Phenotype	MP:0003069	abnormal superior semicircular canal morphology			0.0001867	0.8121	0.005524	0.04947	5	20	EYA1,HOXA1,CHD7,SIX1,PAX2
Mouse Phenotype	MP:0011386	increased metanephric mesenchyme apoptosis			0.0001867	0.8121	0.005524	0.04947	5	20	EYA1,HOXA11,SALL1,HOXD11,WT1
Mouse Phenotype	MP:0003720	abnormal neural tube closure			0.0001975	0.8592	0.005805	0.05199	26	430	CDK8,SOX11,TGIF2,PATZ1,LAPTM4B,BARD1,MARCKSL1,HOXA1,FZD7,JARID2,SALL2,SALL1,BRCA1,FEN1,FGF8,FOXC1,RANBP1,TCF3,FZD3,STIL,DNAAF2,TENM4,SMARCC1,PAX2,FZD2,TMEM100
Mouse Phenotype	MP:0002706	abnormal kidney size			0.000214	0.9309	0.006248	0.05595	25	408	B3GALT2,MYCN,PTTG1,ETV4,ETV5,EYA1,EZH2,GFRA1,HOXA11,SINHCAF,SALL2,SALL1,GPC3,HOXD10,HOXD11,FOXC1,FOXD1,WT1,ITGA8,SIX1,PAX2,PRKDC,SIX2,KDM1A,HELLS
Mouse Phenotype	MP:0006042	increased apoptosis			0.0002271	0.9878	0.006586	0.05898	49	1044	MYCN,SOX11,KIF18A,TGIF2,MCM3,CHEK1,EYA1,MCM10,EZH2,HOXA1,AURKA,HOXA11,SALL2,SALL1,BRCA1,HOXD11,BUB1B,FEN1,KIF14,FGF8,NOVA1,COL2A1,RAD51,MIS18A,WT1,APEX1,BIRC5,CHD7,INPP5F,SIX1,SKP2,CDCA8,E2F8,ARID3B,DNAAF2,TLE4,SMARCC1,ELAVL4,PAX2,CDK1,PRKDC,CDC20,CDC25A,CDC25C,KDM1A,MAD2L1,HDAC2,AURKB,HELLS
Mouse Phenotype	MP:0008249	abnormal common lymphocyte progenitor cell morphology			0.0002305	1	0.006642	0.05948	6	32	PCLAF,HMGB3,GMNN,ARID3B,SMARCC1,MYB
Mouse Phenotype	MP:0003121	genetic imprinting			0.0002358	1	0.006747	0.06042	7	45	PEG10,PEG3,DLK1,MEST,GPC3,CITED1,HELLS
Mouse Phenotype	MP:0003036	vertebral transformation			0.0002411	1	0.006853	0.06137	11	109	HOXA5,HOXA6,HOXA10,HOXA11,HOXB9,HOXC4,HOXC6,HOXD4,HOXD10,HOXD11,PGAP1
Mouse Phenotype	MP:0005159	azoospermia			0.0002449	1	0.00688	0.06162	16	207	MAP2,PATZ1,ETV5,HOXA10,HOXA11,CKS2,BRCA1,HSF2,DNMT3A,RANBP1,VRK1,WT1,HMGA2,PAFAH1B3,CDK1,CDK2
Mouse Phenotype	MP:0004198	abnormal fetal size			0.0002465	1	0.00688	0.06162	18	250	MYCN,PATZ1,MCM3,MEST,CADM1,PGAP1,DHFR,BUB1,MACROH2A2,FOXC1,NOVA1,COL2A1,RNASEH2A,NSD2,CITED1,LMNB2,LMNB1,HELLS
Mouse Phenotype	MP:0002216	abnormal seminiferous tubule morphology			0.0002467	1	0.00688	0.06162	23	364	KIF18A,BRIP1,PATZ1,HMGB2,TRIP13,CDC7,HOXA10,BUB1,ASPM,HSF2,VRK1,RBP1,WT1,APEX1,FANCL,E2F5,ADGRG2,CCNE2,PAFAH1B3,H2AX,CDK1,PRKDC,CDK2
Mouse Phenotype	MP:0003162	decreased lateral semicircular canal size			0.0002542	1	0.006999	0.06267	4	12	EYA1,CHD7,SIX1,PAX2
Mouse Phenotype	MP:0008066	small endolymphatic duct			0.0002542	1	0.006999	0.06267	4	12	EYA1,CHD7,SIX1,PAX2
Mouse Phenotype	MP:0002184	abnormal innervation			0.0002589	1	0.007083	0.06343	18	251	SOX11,ETV1,ETV4,CHN1,CHRNA1,GFRA1,CDK5R1,HOXD1,ECEL1,NPTX2,CHRNA9,NRTN,CHD7,LMNB2,LMNB1,UNC5C,ROBO1,PAX2
Mouse Phenotype	MP:0013693	abnormal hemopoiesis			0.0002679	1	0.007282	0.06522	47	995	PCLAF,PATZ1,BACH2,MCM3,HMGB3,MCM4,PFAS,DLK1,ACTL6A,EZH2,MEIS1,STAT4,BLM,JARID2,HOXC4,CADM1,BRCA1,DHFR,BUB1B,FEN1,SAC3D1,UNG,DNMT3A,TCF3,BIRC5,MSH2,SKP2,GMNN,CCNA2,ARID3B,CCNE1,YEATS4,CCNB2,CCNE2,TLE4,EXO1,H2AX,RACGAP1,SMARCC1,PRKDC,CDC25A,KDM1A,PCNA,CDK2,HDAC2,MYB,HELLS
Mouse Phenotype	MP:0000846	abnormal medulla oblongata morphology			0.0002752	1	0.007435	0.06659	6	33	MYCN,MAP2,CACNA2D2,ZNF423,UCHL1,UNC5C
Mouse Phenotype	MP:0001926	female infertility			0.0002774	1	0.00745	0.06671	25	415	KIF18A,KDM5B,CACNA2D2,PATZ1,DLGAP5,ETV5,CA14,EYA1,MDK,TRIP13,HOXA10,HOXA11,CKS2,HOXD11,BUB1B,HSF2,DNMT3A,TCF3,VRK1,FANCL,HMGA2,EXO1,PRKDC,CDC20,CDK2
Mouse Phenotype	MP:0000783	abnormal forebrain morphology			0.0002835	1	0.007566	0.06776	53	1168	MYCN,SOX11,DLG5,TGIF2,CENPA,MAP2,CACNA2D2,PATZ1,ZNF423,PEG3,NCAM1,BRINP1,MARCKSL1,EYA1,DBN1,BCOR,MDK,CHN1,CDK5R1,CADM1,SALL1,PGAP1,ASPM,KIF14,FGF8,HSF2,WASF1,FOXC1,FOXD1,COL2A1,RANBP1,FZD3,DPYSL4,E2F5,CHD7,LMNB2,SIX1,NCAPH,DNAAF2,LMNB1,TIAM1,HEY1,ASNS,SLIT1,TPX2,SMARCC1,ROBO1,PAX2,PRKDC,TMEM100,TCF7L1,KDM1A,HDAC2
Mouse Phenotype	MP:0008148	abnormal sternocostal joint morphology			0.000295	1	0.007825	0.07008	9	77	SOX11,EYA1,HOXA5,HOXA10,HOXB9,HOXC4,GPC3,FOXC1,SIX1
Mouse Phenotype	MP:0003694	failure of blastocyst to hatch from the zona pellucida			0.0003114	1	0.00821	0.07352	7	47	ORC6,CHEK1,AURKA,KIF11,BIRC5,ECT2,CDCA8
Mouse Phenotype	MP:0002027	increased lung adenocarcinoma incidence			0.0003254	1	0.008501	0.07613	9	78	MCM4,BUB1B,FEN1,DNA2,PCBP4,MSH2,TPX2,ROBO1,MAD2L1
Mouse Phenotype	MP:0005106	abnormal incus morphology			0.0003264	1	0.008501	0.07613	6	34	EYA1,HOXA1,HOXA2,FGF8,CHD7,SIX1
Mouse Phenotype	MP:0005306	abnormal phalanx morphology			0.0003559	1	0.009214	0.08252	10	96	SOX11,MYO10,ETV4,ETV5,HOXA11,HOXD11,FOXC1,COL2A1,LRP4,HAS2
Mouse Phenotype	MP:0003122	maternal imprinting			0.000378	1	0.00973	0.08714	5	23	PEG10,PEG3,DLK1,MEST,GPC3
Mouse Phenotype	MP:0001925	male infertility			0.0003889	1	0.009952	0.08912	38	762	KIF18A,CDO1,CLGN,MAP2,PATZ1,BARD1,ETV4,ETV5,TRIP13,ELOVL2,HOXA10,HOXA11,CKS2,CADM1,BRCA1,HOXD4,HOXD10,HOXD11,PGAP1,BUB1,BUB1B,HSF2,DNMT3A,RANBP1,VRK1,WT1,FANCL,E2F5,TBC1D8,HMGA2,CCNE2,UNC5C,PAFAH1B3,EXO1,TMF1,PRKDC,CDK2,HELLS
Mouse Phenotype	MP:0003702	abnormal chromosome morphology			0.000394	1	0.01002	0.08975	9	80	PTTG1,BRIP1,CENPA,CHEK1,BRCA1,FEN1,DNA2,CDC20,HELLS
Mouse Phenotype	MP:0003147	absent cochlea			0.0004139	1	0.01034	0.09264	3	6	EYA1,SIX1,PAX2
Mouse Phenotype	MP:0009460	skeletal muscle hypoplasia			0.0004139	1	0.01034	0.09264	3	6	CACNA2D2,EYA1,SIX1
Mouse Phenotype	MP:0008159	increased diameter of fibula			0.0004139	1	0.01034	0.09264	3	6	HOXA11,HOXD11,COL2A1
Mouse Phenotype	MP:0001117	absent gametes			0.0004162	1	0.01034	0.09264	16	217	MAP2,PATZ1,ETV5,HOXA10,HOXA11,CKS2,BRCA1,HSF2,DNMT3A,RANBP1,VRK1,WT1,HMGA2,PAFAH1B3,CDK1,CDK2
Mouse Phenotype	MP:0000937	abnormal motor neuron morphology			0.0004235	1	0.01047	0.09374	15	196	CACNA2D2,ATP8A2,ETV4,CHN1,CHRNA1,GFRA1,CDK5R1,UCHL1,ECEL1,DNMT3A,COL13A1,LMNB2,LMNB1,UNC5C,LRP4
Mouse Phenotype	MP:0008008	early cellular replicative senescence			0.0004325	1	0.01063	0.09519	9	81	BRIP1,PATZ1,SRPK1,CKS1B,BRCA1,BUB1,BUB1B,CDK1,HDAC2
Mouse Phenotype	MP:0008019	increased liver tumor incidence			0.0004765	1	0.01164	0.1043	12	137	MCM4,AURKA,BRCA1,BUB1,BUB1B,FEN1,DNA2,FOXM1,MSH2,TPX2,CDC20,AURKB
Mouse Phenotype	MP:0000955	abnormal spinal cord morphology			0.0004921	1	0.01196	0.1071	22	358	CACNA2D2,ATP8A2,ETV4,CHN1,CHRNA1,GFRA1,CDK5R1,UCHL1,KIF14,ECEL1,FOXC1,NOVA1,DNMT3A,COL13A1,FZD3,LMNB2,TENM4,LMNB1,SLIT1,UNC5C,LRP4,ROBO1
Mouse Phenotype	MP:0001153	small seminiferous tubules			0.0004947	1	0.01196	0.1071	10	100	PATZ1,HOXA10,BUB1,HSF2,RBP1,PAFAH1B3,H2AX,CDK1,PRKDC,CDK2
Mouse Phenotype	MP:0000940	abnormal motor neuron innervation pattern			0.0005208	1	0.01252	0.1121	7	51	ETV4,CHN1,GFRA1,ECEL1,LMNB2,LMNB1,UNC5C
Mouse Phenotype	MP:0002858	abnormal posterior semicircular canal morphology			0.00057	1	0.01362	0.122	5	25	EYA1,HOXA1,CHD7,SIX1,PAX2
Mouse Phenotype	MP:0010297	increased hepatobiliary system tumor incidence			0.0005797	1	0.01378	0.1234	12	140	MCM4,AURKA,BRCA1,BUB1,BUB1B,FEN1,DNA2,FOXM1,MSH2,TPX2,CDC20,AURKB
Mouse Phenotype	MP:0010402	ventricular septal defect			0.0005953	1	0.01407	0.126	19	292	SOX11,HIC2,MEIS1,HOXA1,FZD7,JARID2,SALL1,GPC3,SYT1,FGF8,FOXC1,NSD2,CHD7,CCNE1,HEY1,CCNE2,ROBO1,FZD2,CDK2
Mouse Phenotype	MP:0000137	abnormal vertebrae morphology			0.0006012	1	0.01414	0.1266	29	539	MYCN,SOX11,CACNA2D2,MYO10,EYA1,EZH2,MEOX1,HOXA5,HOXA6,HOXA10,HOXA11,HOXB9,HOXC4,HOXC6,HOXD1,HOXD4,HOXD10,HOXD11,PGAP1,DSCC1,FOXC1,COL2A1,CHD7,SIX1,TENM4,LMNB1,DLL3,HDAC2,HELLS
Mouse Phenotype	MP:0008714	increased lung carcinoma incidence			0.0006261	1	0.01464	0.1311	10	103	MCM4,AURKA,BUB1B,FEN1,DNA2,PCBP4,MSH2,TPX2,ROBO1,MAD2L1
Mouse Phenotype	MP:0001340	abnormal eyelid morphology			0.0006496	1	0.01492	0.1336	18	271	SOX11,CDO1,MYO10,DLK1,EYA1,HOXA1,HOXA5,PLAG1,FGF8,MACROH2A2,FOXC1,NRTN,FZD3,CHD7,SIX1,RGS7,TCF7L1,HDAC2
Mouse Phenotype	MP:0012055	abnormal phrenic nerve innervation pattern to diaphragm			0.0006556	1	0.01492	0.1336	4	15	ECEL1,LMNB2,LMNB1,UNC5C
Mouse Phenotype	MP:0012054	abnormal phrenic nerve innervation pattern			0.0006556	1	0.01492	0.1336	4	15	ECEL1,LMNB2,LMNB1,UNC5C
Mouse Phenotype	MP:0008760	abnormal immunoglobulin heavy chain V(D)J recombination			0.0006556	1	0.01492	0.1336	4	15	TCF3,EXO1,SMARCC1,PRKDC
Mouse Phenotype	MP:0006254	thin cerebral cortex			0.0006584	1	0.01492	0.1336	12	142	SOX11,MARCKSL1,ASPM,KIF14,WASF1,RANBP1,FZD3,LMNB2,NCAPH,DNAAF2,LMNB1,ASNS
Mouse Phenotype	MP:0011704	decreased fibroblast proliferation			0.0006584	1	0.01492	0.1336	12	142	KIF18A,PATZ1,MCM2,MCM3,MCM4,BRCA1,BUB1,FEN1,MIS18A,CCNE1,CDK2,HDAC2
Mouse Phenotype	MP:0000825	dilated lateral ventricles			0.0006736	1	0.01508	0.135	8	69	DLG5,ZNF423,CDK5R1,HSF2,FOXC1,FZD3,E2F5,CHD7
Mouse Phenotype	MP:0010763	abnormal hematopoietic stem cell physiology			0.0006736	1	0.01508	0.135	8	69	PCLAF,MCM3,ACTL6A,MEIS1,GPC3,GMNN,TLE4,PRKDC
Mouse Phenotype	MP:0006307	abnormal seminiferous tubule size			0.0006758	1	0.01508	0.135	10	104	PATZ1,HOXA10,BUB1,HSF2,RBP1,PAFAH1B3,H2AX,CDK1,PRKDC,CDK2
Mouse Phenotype	MP:0008488	abnormal semicircular canal ampulla morphology			0.0007036	1	0.01543	0.1382	6	39	EYA1,HOXA1,FZD3,CHD7,SIX1,PAX2
Mouse Phenotype	MP:0003698	abnormal male reproductive system physiology			0.0007057	1	0.01543	0.1382	48	1068	KIF18A,CDO1,CLGN,MAP2,CACNA2D2,PATZ1,BARD1,ETV4,ETV5,HMGB2,TRIP13,ELOVL2,HOXA10,HOXA11,CKS2,CADM1,BRCA1,HOXD4,HOXD10,HOXD11,PGAP1,BUB1,BUB1B,ASPM,PLAG1,HSF2,DNMT3A,RANBP1,VRK1,FZD3,WT1,FANCL,E2F5,CHD7,CCNE1,TBC1D8,HMGA2,ADGRG2,CCNE2,UNC5C,PAFAH1B3,EXO1,TMF1,PAX2,CDK1,PRKDC,CDK2,HELLS
Mouse Phenotype	MP:0008065	short endolymphatic duct			0.0007093	1	0.01543	0.1382	3	7	EYA1,SIX1,PAX2
Mouse Phenotype	MP:0004323	sternum hypoplasia			0.0007093	1	0.01543	0.1382	3	7	SOX11,HOXB9,HOXC4
Mouse Phenotype	MP:0004317	small vestibular saccule			0.0007093	1	0.01543	0.1382	3	7	EYA1,SIX1,PAX2
Mouse Phenotype	MP:0020363	abnormal germ cell physiology			0.0007315	1	0.01573	0.1409	14	185	KIF18A,BRIP1,ETV5,HOXA11,BRCA1,HSF2,FOXC1,RANBP1,FANCL,PAFAH1B3,EXO1,CDK1,CDK2,HELLS
Mouse Phenotype	MP:0008716	increased lung non-small cell carcinoma incidence			0.0007341	1	0.01573	0.1409	9	87	MCM4,BUB1B,FEN1,DNA2,PCBP4,MSH2,TPX2,ROBO1,MAD2L1
Mouse Phenotype	MP:0002006	neoplasm			0.0007342	1	0.01573	0.1409	45	984	BRIP1,BARD1,ETV4,MCM2,MCM3,MCM4,MCM6,CHEK1,HMMR,EZH2,BLM,AURKA,CKS1B,BRCA1,BUB1,BUB1B,FEN1,UNG,DNA2,PCBP4,FOXM1,TCF3,RAE1,WT1,APEX1,MSH2,SUV39H2,CCNE1,MSH6,IGF2BP2,HMGA2,TIAM1,TPX2,EXO1,AUTS2,H2AX,ROBO1,CDK1,PRKDC,CDC20,CDC25A,MAD2L1,CDK2,HDAC2,AURKB
Mouse Phenotype	MP:0008261	arrest of male meiosis			0.0007459	1	0.01575	0.1411	12	144	KIF18A,MAP2,TRIP13,CDC7,CKS2,BRCA1,HSF2,VRK1,SUV39H2,H2AX,CDK1,HELLS
Mouse Phenotype	MP:0008014	increased lung tumor incidence			0.0007459	1	0.01575	0.1411	12	144	MCM4,AURKA,BUB1,BUB1B,FEN1,DNA2,PCBP4,FOXM1,MSH2,TPX2,ROBO1,MAD2L1
Mouse Phenotype	MP:0010298	increased respiratory system tumor incidence			0.0007459	1	0.01575	0.1411	12	144	MCM4,AURKA,BUB1,BUB1B,FEN1,DNA2,PCBP4,FOXM1,MSH2,TPX2,ROBO1,MAD2L1
Mouse Phenotype	MP:0020152	abnormal oocyte number			0.0007979	1	0.01643	0.1471	9	88	KIF18A,PEG3,HMMR,TRIP13,HSF2,FOXC1,EXO1,CDK1,CDK2
Mouse Phenotype	MP:0005431	decreased oocyte number			0.0007979	1	0.01643	0.1471	9	88	KIF18A,PEG3,HMMR,TRIP13,HSF2,FOXC1,EXO1,CDK1,CDK2
Mouse Phenotype	MP:0004717	absent cochlear nerve			0.0008121	1	0.01643	0.1471	2	2	HOXA1,PAX2
Mouse Phenotype	MP:0013430	increased memory CD4-positive, CD25-positive, alpha-beta regulatory T cell number			0.0008121	1	0.01643	0.1471	2	2	PCLAF,BACH2
Mouse Phenotype	MP:0013428	abnormal memory CD4-positive, CD25-positive, alpha-beta regulatory T cell number			0.0008121	1	0.01643	0.1471	2	2	PCLAF,BACH2
Mouse Phenotype	MP:0008064	decreased otic epithelial cell proliferation			0.0008121	1	0.01643	0.1471	2	2	EYA1,SIX1
Mouse Phenotype	MP:0004649	decreased sacral vertebrae number			0.0008121	1	0.01643	0.1471	2	2	HOXA11,HOXD11
Mouse Phenotype	MP:0010118	abnormal intermediate mesoderm morphology			0.0008121	1	0.01643	0.1471	2	2	WT1,PAX2
Mouse Phenotype	MP:0012816	abnormal rhombomere boundary morphology			0.0008121	1	0.01643	0.1471	2	2	HOXA1,HOXA2
Mouse Phenotype	MP:0000040	absent middle ear ossicles			0.0008271	1	0.01666	0.1492	5	27	EYA1,HOXA1,HOXA2,FGF8,SIX1
Mouse Phenotype	MP:0005076	abnormal cell differentiation			0.0009523	1	0.01909	0.1709	37	771	MYCN,SOX11,DLG5,PATZ1,ETV1,NCAM1,BRINP1,DLK1,EYA1,EZH2,CHN1,HOXA1,HOXA2,CDK5R1,GPC3,HOXD10,BUB1B,FGF8,ECEL1,FOXC1,DNMT3A,RANBP1,LMNB2,GMNN,LMNB1,SLIT1,UNC5C,ZNF516,AUTS2,LRP4,ROBO1,ELAVL4,NEIL3,PAX2,CDC25A,CDC25C,MYB
Mouse Phenotype	MP:0000830	abnormal diencephalon morphology			0.0009706	1	0.01937	0.1734	20	328	DLG5,CACNA2D2,PATZ1,ZNF423,PEG3,EYA1,PGAP1,FGF8,HSF2,FOXC1,COL2A1,FZD3,E2F5,CHD7,SIX1,TIAM1,TPX2,SMARCC1,PAX2,KDM1A
Mouse Phenotype	MP:0030095	abnormal midface morphology			0.000984	1	0.01954	0.175	5	28	EYA1,HOXA1,FGF8,COL2A1,SIX1
Mouse Phenotype	MP:0001730	embryonic growth arrest			0.000998	1	0.01973	0.1767	21	353	MYCN,SOX11,NASP,MCM10,EZH2,GINS1,AURKA,PRMT1,KIF11,RAD51,CHD7,GMNN,CCNA2,DNAAF2,TENM4,TPX2,RACGAP1,CDK1,CDC20,PLK4,KDM1A
Mouse Phenotype	MP:0000157	abnormal sternum morphology			0.001034	1	0.02035	0.1822	16	236	SOX11,EYA1,MEOX1,HOXA5,HOXA6,HOXA10,JARID2,HOXB9,HOXC4,HOXC6,GPC3,PGAP1,FOXC1,NSD2,SIX1,DLL3
Mouse Phenotype	MP:0000433	microcephaly			0.001047	1	0.02052	0.1838	10	110	MYCN,EYA1,BCOR,PGAP1,ASPM,KIF14,COL2A1,RANBP1,LMNB2,LMNB1
Mouse Phenotype	MP:0004670	small vertebral body			0.001093	1	0.02105	0.1885	4	17	MYCN,CACNA2D2,FOXC1,COL2A1
Mouse Phenotype	MP:0004204	absent stapes			0.001093	1	0.02105	0.1885	4	17	EYA1,HOXA1,HOXA2,SIX1
Mouse Phenotype	MP:0010264	increased hepatoma incidence			0.001093	1	0.02105	0.1885	4	17	AURKA,BRCA1,DNA2,CDC20
Mouse Phenotype	MP:0002399	abnormal pluripotent precursor cell morphology			0.001093	1	0.02105	0.1885	4	17	MCM2,MCM3,MCM4,DNMT3A
Mouse Phenotype	MP:0004680	small xiphoid process			0.001111	1	0.0212	0.1899	3	8	HOXA6,HOXA10,HOXC6
Mouse Phenotype	MP:0011903	decreased hematopoietic stem cell proliferation			0.001111	1	0.0212	0.1899	3	8	MCM3,ACTL6A,GMNN
Mouse Phenotype	MP:0002429	abnormal blood cell morphology/development			0.001132	1	0.0215	0.1926	50	1150	MYCN,PCLAF,PATZ1,BACH2,MCM3,HMGB3,MCM4,PFAS,DLK1,ACTL6A,EZH2,MEIS1,ADD2,STAT4,BLM,JARID2,HOXC4,CADM1,BRCA1,DHFR,BUB1,BUB1B,FEN1,SAC3D1,UNG,DNMT3A,TCF3,BIRC5,MSH2,SKP2,GMNN,CCNA2,ARID3B,CCNE1,YEATS4,CCNB2,CCNE2,TLE4,EXO1,H2AX,RACGAP1,SMARCC1,PRKDC,CDC25A,KDM1A,PCNA,CDK2,HDAC2,MYB,HELLS
Mouse Phenotype	MP:0003048	abnormal cervical vertebrae morphology			0.001154	1	0.02183	0.1955	11	131	EYA1,HOXA5,HOXA6,HOXC6,HOXD1,HOXD4,PGAP1,FOXC1,SIX1,TENM4,DLL3
Mouse Phenotype	MP:0010380	abnormal inner cell mass apoptosis			0.001162	1	0.02188	0.1959	5	29	NUSAP1,CHEK1,GINS1,ODC1,MAD2L1
Mouse Phenotype	MP:0020550	multinucleated giant male germ cells			0.001197	1	0.02243	0.2009	6	43	HMGB2,CDC7,CKS2,HSF2,CCNE2,PAFAH1B3
Mouse Phenotype	MP:0002007	increased cellular sensitivity to gamma-irradiation			0.001267	1	0.0236	0.2113	7	59	BRCA1,RAD54B,FEN1,RAD51,APEX1,PRKDC,CDC25A
Mouse Phenotype	MP:0030804	abnormal synovial joint morphology			0.001269	1	0.0236	0.2113	12	153	SOX11,EYA1,HOXA2,HOXA5,HOXA10,HOXB9,HOXC4,GPC3,FOXC1,COL2A1,CHD7,SIX1
Mouse Phenotype	MP:0000333	decreased bone marrow cell number			0.001343	1	0.02486	0.2226	12	154	PCLAF,ACTL6A,MEIS1,BUB1B,GMNN,CCNA2,TLE4,RACGAP1,PRKDC,KDM1A,HDAC2,MYB
Mouse Phenotype	MP:0014040	increased cellular sensitivity to DNA damaging agents			0.001363	1	0.02503	0.2241	5	30	BRIP1,BARD1,FEN1,E2F8,PRKDC
Mouse Phenotype	MP:0002914	abnormal endplate potential			0.001375	1	0.02503	0.2241	4	18	CHRNA1,UCHL1,COL13A1,LRP4
Mouse Phenotype	MP:0000464	increased presacral vertebrae number			0.001375	1	0.02503	0.2241	4	18	HOXA10,HOXA11,HOXD11,DSCC1
Mouse Phenotype	MP:0012729	abnormal common carotid artery morphology			0.001375	1	0.02503	0.2241	4	18	EYA1,FGF8,CHD7,SIX1
Mouse Phenotype	MP:0004816	abnormal class switch recombination			0.001383	1	0.02506	0.2244	9	95	BACH2,BLM,HOXC4,UNG,MSH2,EXO1,H2AX,PRKDC,PCNA
Mouse Phenotype	MP:0002132	abnormal respiratory system morphology			0.001445	1	0.02609	0.2336	45	1017	B3GALT2,MYCN,SOX11,CDO1,TGIF2,ZNF423,ETV5,MCM4,EYA1,MEIS1,MEX3C,HOXA1,HOXA2,HOXA5,AURKA,GPC3,PGAP1,BUB1,BUB1B,FEN1,SYT1,FGF8,DNA2,PCBP4,FOXC1,FOXD1,COL2A1,FOXM1,FZD3,WT1,ITGA8,CHD7,MSH2,LMNB2,SIX1,E2F8,DNAAF2,LMNB1,TPX2,LRP4,ROBO1,PRKDC,TMEM100,KDM1A,MAD2L1
Mouse Phenotype	MP:0011089	perinatal lethality, complete penetrance			0.0015	1	0.02696	0.2414	20	340	SOX11,MAP2,EZH2,GFRA1,HOXA1,HOXA2,JARID2,SALL2,SALL1,GPC3,FGF8,ECEL1,COL2A1,RNASEH2A,WT1,SIX1,SLIT1,LRP4,ROBO1,PAX2
Mouse Phenotype	MP:0004508	abnormal pectoral girdle bone morphology			0.001585	1	0.02838	0.2541	18	293	SOX11,EYA1,MEOX1,HOXA5,HOXA6,HOXA10,JARID2,HOXB9,HOXC4,HOXC6,GPC3,PGAP1,FOXC1,COL2A1,NSD2,CHD7,SIX1,DLL3
Mouse Phenotype	MP:0008161	increased diameter of radius			0.001632	1	0.02852	0.2554	3	9	HOXA11,HOXD11,COL2A1
Mouse Phenotype	MP:0008163	increased diameter of ulna			0.001632	1	0.02852	0.2554	3	9	HOXA11,HOXD11,COL2A1
Mouse Phenotype	MP:0004248	abnormal epaxial muscle morphology			0.001632	1	0.02852	0.2554	3	9	EYA1,MEOX1,SIX1
Mouse Phenotype	MP:0004369	absent utricle			0.001632	1	0.02852	0.2554	3	9	HOXA1,CHD7,PAX2
Mouse Phenotype	MP:0010241	abnormal aortic arch development			0.001632	1	0.02852	0.2554	3	9	FGF8,CCNE1,CCNE2
Mouse Phenotype	MP:0011243	decreased fetal derived definitive erythrocyte cell number			0.001632	1	0.02852	0.2554	3	9	MCM3,JARID2,KDM1A
Mouse Phenotype	MP:0003699	abnormal female reproductive system physiology			0.001684	1	0.02917	0.2613	37	796	KIF18A,KDM5B,PTTG1,CACNA2D2,PATZ1,DLGAP5,ETV5,CA14,CHEK1,HMMR,EYA1,MDK,TRIP13,TTK,HOXA5,HOXA10,HOXA11,CKS2,BRCA1,HOXD11,BUB1B,ASPM,PRMT1,HSF2,FOXC1,KIF11,DNMT3A,TCF3,VRK1,FANCL,CHD7,HMGA2,DLL3,EXO1,PRKDC,CDC20,CDK2
Mouse Phenotype	MP:0009677	abnormal spinal cord dorsal column morphology			0.001703	1	0.02917	0.2613	4	19	CHN1,UCHL1,TENM4,UNC5C
Mouse Phenotype	MP:0004617	sacral vertebral transformation			0.001703	1	0.02917	0.2613	4	19	HOXA10,HOXA11,HOXD10,HOXD11
Mouse Phenotype	MP:0002685	abnormal spermatogonia proliferation			0.001703	1	0.02917	0.2613	4	19	BRIP1,PATZ1,ETV5,VRK1
Mouse Phenotype	MP:0003706	abnormal cell nucleus count			0.001703	1	0.02917	0.2613	4	19	BIRC5,CDCA8,CDK1,AURKB
Mouse Phenotype	MP:0004835	abnormal miniature endplate potential			0.001839	1	0.03125	0.2799	5	32	CACNA2D2,CHRNA1,UCHL1,COL13A1,LRP4
Mouse Phenotype	MP:0000018	small ears			0.001839	1	0.03125	0.2799	5	32	HOXA1,HOXA2,FGF8,HMGA2,PRKDC
Mouse Phenotype	MP:0002144	abnormal B cell differentiation			0.00191	1	0.03233	0.2895	20	347	BACH2,PFAS,DLK1,EZH2,BLM,HOXC4,UNG,TCF3,MSH2,SKP2,ARID3B,TLE4,EXO1,H2AX,RACGAP1,SMARCC1,PRKDC,PCNA,HDAC2,MYB
Mouse Phenotype	MP:0006113	abnormal heart septum morphology			0.001934	1	0.03261	0.2921	24	449	MYCN,SOX11,HIC2,EYA1,MEIS1,HOXA1,FZD7,JARID2,SALL1,GPC3,SYT1,FGF8,FOXC1,NSD2,CHD7,SIX1,CCNE1,HEY1,CCNE2,AUTS2,ROBO1,FZD2,CDK2,HDAC2
Mouse Phenotype	MP:0001078	abnormal phrenic nerve morphology			0.002118	1	0.03552	0.3181	5	33	ECEL1,LMNB2,LMNB1,UNC5C,LRP4
Mouse Phenotype	MP:0004810	decreased hematopoietic stem cell number			0.002123	1	0.03552	0.3181	9	101	MYCN,PCLAF,ACTL6A,GPC3,CCNA2,TLE4,PRKDC,KDM1A,MYB
Mouse Phenotype	MP:0004703	abnormal vertebral column morphology			0.002184	1	0.03633	0.3254	37	808	MYCN,SOX11,CDO1,CACNA2D2,MYO10,EYA1,EZH2,CHRNA1,MEOX1,HOXA5,HOXA6,HOXA10,HOXA11,HOXB9,HOXC4,HOXC6,HOXD1,BRCA1,HOXD4,HOXD10,HOXD11,UCHL1,PGAP1,BUB1B,DSCC1,FOXC1,COL2A1,RAE1,CHD7,SIX1,TENM4,LMNB1,DLL3,LRP4,PRKDC,HDAC2,HELLS
Mouse Phenotype	MP:0011702	abnormal fibroblast proliferation			0.002188	1	0.03633	0.3254	13	185	KIF18A,PATZ1,MCM2,MCM3,MCM4,BRCA1,BUB1,FEN1,PCBP4,MIS18A,CCNE1,CDK2,HDAC2
Mouse Phenotype	MP:0011110	preweaning lethality, incomplete penetrance			0.002251	1	0.03701	0.3315	34	725	B3GALT2,KNTC1,KDM5B,LRRC49,LAPTM4B,DLK1,MARCKSL1,EYA1,DBN1,BCL7A,MDK,RRM1,CHN1,BRCA1,SYT1,ANP32E,UNG,ITM2C,ELOVL6,DSCC1,DNMT3A,FZD3,ITGA8,CHD7,MSH2,CEP55,CCNB2,FANCI,UNC5C,LRP4,ROBO1,PAX2,CDK2,MYB
Mouse Phenotype	MP:0010173	increased mammary gland epithelial cell proliferation			0.002284	1	0.03701	0.3315	3	10	BRCA1,CCNE1,ROBO1
Mouse Phenotype	MP:0002021	increased incidence of induced tumors			0.00229	1	0.03701	0.3315	12	164	BLM,BRCA1,BUB1,BUB1B,FOXM1,TCF3,RAE1,MSH2,H2AX,PRKDC,CDC25A,MAD2L1
Mouse Phenotype	MP:0030149	abnormal stylohyoid muscle morphology			0.002323	1	0.03701	0.3315	2	3	HOXA1,HOXA2
Mouse Phenotype	MP:0008315	abnormal otic ganglion morphology			0.002323	1	0.03701	0.3315	2	3	GFRA1,NRTN
Mouse Phenotype	MP:0013466	keratoconjunctivitis sicca			0.002323	1	0.03701	0.3315	2	3	NRTN,CHD7
Mouse Phenotype	MP:0004654	absent lumbar vertebrae			0.002323	1	0.03701	0.3315	2	3	HOXA10,HOXD10
Mouse Phenotype	MP:0010986	abnormal mesonephric mesenchyme morphology			0.002323	1	0.03701	0.3315	2	3	MYCN,PAX2
Mouse Phenotype	MP:0013817	absent nasal cavity			0.002323	1	0.03701	0.3315	2	3	PGAP1,COL2A1
Mouse Phenotype	MP:0030421	tongue muscle hypoplasia			0.002323	1	0.03701	0.3315	2	3	EYA1,SIX1
Mouse Phenotype	MP:0030426	facial muscle hypoplasia			0.002323	1	0.03701	0.3315	2	3	EYA1,SIX1
Mouse Phenotype	MP:0004837	abnormal neural fold formation			0.002427	1	0.03854	0.3451	5	34	JARID2,SALL2,FGF8,SMARCC1,TCF7L1
Mouse Phenotype	MP:0003148	decreased cochlear coiling			0.002516	1	0.03952	0.3539	4	21	EYA1,CHD7,SIX1,PAX2
Mouse Phenotype	MP:0005579	absent outer ear			0.002516	1	0.03952	0.3539	4	21	EYA1,HOXA1,HOXA2,SIX1
Mouse Phenotype	MP:0003703	abnormal vestibulocochlear ganglion morphology			0.002516	1	0.03952	0.3539	4	21	HOXA1,CHD7,SIX1,PAX2
Mouse Phenotype	MP:0001125	abnormal oocyte morphology			0.002583	1	0.04032	0.361	10	124	KIF18A,PEG3,HMMR,TRIP13,HSF2,FOXC1,EXO1,CDK1,CDC20,CDK2
Mouse Phenotype	MP:0011092	embryonic lethality, complete penetrance			0.002586	1	0.04032	0.361	26	512	PTTG1,BARD1,ETV5,MCM4,HIC2,ACTL6A,EZH2,BLM,AURKA,BRCA1,BUB1,BUB1B,DNA2,DNMT3A,WT1,CITED1,CHD7,NCAPH,CDCA8,CCNB1,ARID3B,DNAAF2,YEATS4,TPX2,CDK1,PLK4
Mouse Phenotype	MP:0005104	abnormal tarsal bone morphology			0.002646	1	0.04082	0.3655	6	50	SOX11,HOXA11,GPC3,HOXD11,FGF8,FOXC1
Mouse Phenotype	MP:0000155	asymmetric rib joints			0.002646	1	0.04082	0.3655	6	50	SOX11,DLK1,HOXA5,HOXA6,HOXA10,GPC3
Mouse Phenotype	MP:0004157	interrupted aortic arch			0.002646	1	0.04082	0.3655	6	50	EYA1,HOXA1,FGF8,FOXC1,CHD7,SIX1
Mouse Phenotype	MP:0013560	abnormal endocrine gland morphology			0.002656	1	0.04082	0.3656	45	1049	PTTG1,CACNA2D2,PCLAF,PATZ1,DACH1,MCM4,EYA1,EZH2,STAT4,HOXA1,HOXA5,HOXA7,JARID2,HOXB9,CADM1,BRCA1,NRXN1,PGAP1,FEN1,SYT1,FGF8,SAC3D1,UNG,ELOVL6,FOXC1,FOXD1,DNMT3A,FOXM1,TCF3,WT1,BIRC5,CHD7,SIX1,GMNN,HMGA2,CCNB2,TLE4,TPX2,PAX2,PRKDC,TMEM35A,KDM1A,HDAC2,MYB,HELLS
Mouse Phenotype	MP:0010365	increased thymus tumor incidence			0.002771	1	0.04244	0.3801	9	105	MCM2,MCM4,BRCA1,FEN1,TCF3,MSH2,H2AX,PRKDC,HDAC2
Mouse Phenotype	MP:0002082	postnatal lethality			0.002812	1	0.04291	0.3843	57	1412	MYCN,SOX11,CDO1,CACNA2D2,ATP8A2,ZNF423,PEG3,ETV5,MCM2,MCM3,MCM4,MCM6,CA14,MCM7,BRINP1,DLK1,TRIP13,CDC7,HOXA1,HOXA5,FZD7,HOXA11,MEST,HOXC4,GPC3,HOXD4,NRXN1,HOXD11,KIF14,SYT1,FGF8,HSF2,WASF1,NOVA1,DNMT3A,COL2A1,TCF3,NSD2,WT1,CHD7,MSH2,EDN3,DNAAF2,TIA1,HEY1,DLL3,LRP4,PAX2,PRKDC,CDC25A,CDC25C,FZD2,SIX2,KDM1A,MAD2L1,HDAC2,HELLS
Mouse Phenotype	MP:0001931	abnormal oogenesis			0.002937	1	0.04467	0.4	12	169	KIF18A,PEG3,HMMR,TRIP13,TTK,CKS2,HSF2,FOXC1,EXO1,CDK1,CDC20,CDK2
Mouse Phenotype	MP:0001299	abnormal eye distance/ position			0.002955	1	0.04479	0.4011	9	106	TGIF2,PFAS,PGAP1,COL2A1,RANBP1,NRTN,CHD7,SIX1,PRKDC
Mouse Phenotype	MP:0030039	abnormal facial muscle morphology			0.003008	1	0.04544	0.4069	4	22	EYA1,HOXA1,HOXA2,SIX1
Mouse Phenotype	MP:0003163	absent posterior semicircular canal			0.003075	1	0.04574	0.4096	3	11	EYA1,HOXA1,CHD7
Mouse Phenotype	MP:0000555	absent carpal bone			0.003075	1	0.04574	0.4096	3	11	HOXA11,SALL1,HOXD11
Mouse Phenotype	MP:0011241	abnormal fetal derived definitive erythrocyte cell number			0.003075	1	0.04574	0.4096	3	11	MCM3,JARID2,KDM1A
Mouse Phenotype	MP:0011240	abnormal fetal derived definitive erythrocyte morphology			0.003075	1	0.04574	0.4096	3	11	MCM3,JARID2,KDM1A
Mouse Phenotype	MP:0000788	abnormal cerebral cortex morphology			0.003081	1	0.04574	0.4096	22	413	MYCN,SOX11,MAP2,BRINP1,MARCKSL1,CHN1,CDK5R1,CADM1,PGAP1,ASPM,KIF14,WASF1,FOXC1,RANBP1,FZD3,E2F5,CHD7,LMNB2,NCAPH,DNAAF2,LMNB1,ASNS
Mouse Phenotype	MP:0004852	decreased testis weight			0.003212	1	0.04738	0.4243	17	288	KIF18A,PTTG1,MAP2,PATZ1,ETV5,ELOVL2,CADM1,BUB1,ASPM,HSF2,DNMT3A,PAFAH1B3,EXO1,TMF1,SNRPE,PLK4,HELLS
Mouse Phenotype	MP:0010544	interrupted aorta			0.003235	1	0.04738	0.4243	6	52	EYA1,HOXA1,FGF8,FOXC1,CHD7,SIX1
Mouse Phenotype	MP:0008277	abnormal sternum ossification			0.003235	1	0.04738	0.4243	6	52	SOX11,HOXB9,GPC3,FOXC1,NSD2,SIX1
Mouse Phenotype	MP:0004505	decreased renal glomerulus number			0.003235	1	0.04738	0.4243	6	52	ETV4,ETV5,FOXD1,WT1,PAX2,SIX2
Mouse Phenotype	MP:0000281	abnormal interventricular septum morphology			0.003354	1	0.04895	0.4384	21	390	MYCN,SOX11,HIC2,MEIS1,HOXA1,FZD7,JARID2,SALL1,GPC3,SYT1,FGF8,FOXC1,NSD2,CHD7,CCNE1,HEY1,CCNE2,ROBO1,FZD2,CDK2,HDAC2
Mouse Phenotype	MP:0002177	abnormal outer ear morphology			0.003385	1	0.04925	0.4411	11	150	CDO1,EYA1,HOXA1,HOXA2,HOXA5,PGAP1,FGF8,CHD7,SIX1,HMGA2,PRKDC
Domain	IPR020479	Homeobox_metazoa		InterPro	2.632e-10	4.899e-07	1.44e-07	1.167e-06	15	90	HOXA1,MEOX1,HOXA2,HOXA5,HOXA6,HOXA7,HOXA10,HOXA11,HOXB9,HOXC4,HOXC6,HOXD1,HOXD4,HOXD10,HOXD11
Domain	PS00032	ANTENNAPEDIA		PROSITE	4.379e-10	8.149e-07	1.44e-07	1.167e-06	9	24	HOXA1,HOXA2,HOXA5,HOXA6,HOXA7,HOXC4,HOXC6,HOXD1,HOXD4
Domain	IPR027640	Kinesin-like_fam		InterPro	5.316e-10	9.892e-07	1.44e-07	1.167e-06	11	43	KIF18A,CENPE,KIF4A,KIF15,KIF14,KIF11,KIFC1,KIF2C,KIF23,KIF20A,KIF18B
Domain	PF00225	Kinesin		Pfam	6.963e-10	1.296e-06	1.44e-07	1.167e-06	11	44	KIF18A,CENPE,KIF4A,KIF15,KIF14,KIF11,KIFC1,KIF2C,KIF23,KIF20A,KIF18B
Domain	SM00129	KISc		SMART	6.963e-10	1.296e-06	1.44e-07	1.167e-06	11	44	KIF18A,CENPE,KIF4A,KIF15,KIF14,KIF11,KIFC1,KIF2C,KIF23,KIF20A,KIF18B
Domain	IPR001752	Kinesin_motor_dom		InterPro	6.963e-10	1.296e-06	1.44e-07	1.167e-06	11	44	KIF18A,CENPE,KIF4A,KIF15,KIF14,KIF11,KIFC1,KIF2C,KIF23,KIF20A,KIF18B
Domain	PS50067	KINESIN_MOTOR_2		PROSITE	6.963e-10	1.296e-06	1.44e-07	1.167e-06	11	44	KIF18A,CENPE,KIF4A,KIF15,KIF14,KIF11,KIFC1,KIF2C,KIF23,KIF20A,KIF18B
Domain	3.40.850.10	-		Gene3D	6.963e-10	1.296e-06	1.44e-07	1.167e-06	11	44	KIF18A,CENPE,KIF4A,KIF15,KIF14,KIF11,KIFC1,KIF2C,KIF23,KIF20A,KIF18B
Domain	PS00411	KINESIN_MOTOR_1		PROSITE	6.963e-10	1.296e-06	1.44e-07	1.167e-06	11	44	KIF18A,CENPE,KIF4A,KIF15,KIF14,KIF11,KIFC1,KIF2C,KIF23,KIF20A,KIF18B
Domain	IPR001827	Homeobox_Antennapedia_CS		InterPro	3.64e-09	6.774e-06	6.774e-07	5.491e-06	8	21	HOXA2,HOXA5,HOXA6,HOXA7,HOXC4,HOXC6,HOXD1,HOXD4
Domain	IPR019821	Kinesin_motor_CS		InterPro	5.473e-09	1.019e-05	9.26e-07	7.506e-06	10	41	KIF18A,CENPE,KIF4A,KIF14,KIF11,KIFC1,KIF2C,KIF23,KIF20A,KIF18B
Domain	IPR027925	MCM_N		InterPro	1.774e-08	3.302e-05	2.358e-06	1.912e-05	5	6	MCM2,MCM3,MCM4,MCM6,MCM7
Domain	PF14551	MCM_N		Pfam	1.774e-08	3.302e-05	2.358e-06	1.912e-05	5	6	MCM2,MCM3,MCM4,MCM6,MCM7
Domain	IPR018525	MCM_CS		InterPro	1.774e-08	3.302e-05	2.358e-06	1.912e-05	5	6	MCM2,MCM3,MCM4,MCM6,MCM7
Domain	IPR009057	Homeodomain-like		InterPro	5.688e-08	0.0001059	6.682e-06	5.417e-05	24	332	TGIF2,MEIS1,HOXA1,MEOX1,HOXA2,HOXA5,HOXA6,HOXA7,HOXA10,HOXA11,HOXB9,HOXC4,HOXC6,HOXD1,HOXD4,HOXD10,HOXD11,TCF3,SIX1,SMARCC1,PAX2,SIX2,KDM1A,MYB
Domain	1.10.10.60	-		Gene3D	5.745e-08	0.0001069	6.682e-06	5.417e-05	22	283	TGIF2,MEIS1,HOXA1,MEOX1,HOXA2,HOXA5,HOXA6,HOXA7,HOXA10,HOXA11,HOXB9,HOXC4,HOXC6,HOXD1,HOXD4,HOXD10,HOXD11,SIX1,SMARCC1,PAX2,SIX2,MYB
Domain	IPR013763	Cyclin-like		InterPro	1.353e-07	0.0002519	1.42e-05	0.0001151	9	43	ORC6,CDK5R1,CCNJ,CCNA2,CCNB1,CCNE1,CASD1,CCNB2,CCNE2
Domain	IPR033762	MCM_OB		InterPro	1.602e-07	0.0002982	1.42e-05	0.0001151	5	8	MCM2,MCM3,MCM4,MCM6,MCM7
Domain	PS50051	MCM_2		PROSITE	1.602e-07	0.0002982	1.42e-05	0.0001151	5	8	MCM2,MCM3,MCM4,MCM6,MCM7
Domain	PF17207	MCM_OB		Pfam	1.602e-07	0.0002982	1.42e-05	0.0001151	5	8	MCM2,MCM3,MCM4,MCM6,MCM7
Domain	PS00847	MCM_1		PROSITE	1.602e-07	0.0002982	1.42e-05	0.0001151	5	8	MCM2,MCM3,MCM4,MCM6,MCM7
Domain	IPR017970	Homeobox_CS		InterPro	1.924e-07	0.0003581	1.628e-05	0.0001319	17	186	HOXA1,MEOX1,HOXA2,HOXA5,HOXA6,HOXA7,HOXA10,HOXA11,HOXB9,HOXC4,HOXC6,HOXD1,HOXD4,HOXD10,HOXD11,SIX1,SIX2
Domain	PF00046	Homeobox		Pfam	2.381e-07	0.0004431	1.927e-05	0.0001562	19	234	TGIF2,MEIS1,HOXA1,MEOX1,HOXA2,HOXA5,HOXA6,HOXA7,HOXA10,HOXA11,HOXB9,HOXC4,HOXC6,HOXD1,HOXD4,HOXD10,HOXD11,SIX1,SIX2
Domain	PS00027	HOMEOBOX_1		PROSITE	2.718e-07	0.0005057	2.107e-05	0.0001708	19	236	TGIF2,MEIS1,HOXA1,MEOX1,HOXA2,HOXA5,HOXA6,HOXA7,HOXA10,HOXA11,HOXB9,HOXC4,HOXC6,HOXD1,HOXD4,HOXD10,HOXD11,SIX1,SIX2
Domain	SM00389	HOX		SMART	2.902e-07	0.00054	2.129e-05	0.0001726	19	237	TGIF2,MEIS1,HOXA1,MEOX1,HOXA2,HOXA5,HOXA6,HOXA7,HOXA10,HOXA11,HOXB9,HOXC4,HOXC6,HOXD1,HOXD4,HOXD10,HOXD11,SIX1,SIX2
Domain	PS50071	HOMEOBOX_2		PROSITE	3.304e-07	0.0006149	2.129e-05	0.0001726	19	239	TGIF2,MEIS1,HOXA1,MEOX1,HOXA2,HOXA5,HOXA6,HOXA7,HOXA10,HOXA11,HOXB9,HOXC4,HOXC6,HOXD1,HOXD4,HOXD10,HOXD11,SIX1,SIX2
Domain	IPR001356	Homeobox_dom		InterPro	3.304e-07	0.0006149	2.129e-05	0.0001726	19	239	TGIF2,MEIS1,HOXA1,MEOX1,HOXA2,HOXA5,HOXA6,HOXA7,HOXA10,HOXA11,HOXB9,HOXC4,HOXC6,HOXD1,HOXD4,HOXD10,HOXD11,SIX1,SIX2
Domain	SM00350	MCM		SMART	3.546e-07	0.0006599	2.129e-05	0.0001726	5	9	MCM2,MCM3,MCM4,MCM6,MCM7
Domain	IPR001208	MCM_dom		InterPro	3.546e-07	0.0006599	2.129e-05	0.0001726	5	9	MCM2,MCM3,MCM4,MCM6,MCM7
Domain	IPR031327	MCM		InterPro	3.546e-07	0.0006599	2.129e-05	0.0001726	5	9	MCM2,MCM3,MCM4,MCM6,MCM7
Domain	PF00493	MCM		Pfam	3.546e-07	0.0006599	2.129e-05	0.0001726	5	9	MCM2,MCM3,MCM4,MCM6,MCM7
Domain	PF02984	Cyclin_C		Pfam	6.055e-07	0.001127	3.314e-05	0.0002687	6	17	CCNJ,CCNA2,CCNB1,CCNE1,CCNB2,CCNE2
Domain	SM01332	Cyclin_C		SMART	6.055e-07	0.001127	3.314e-05	0.0002687	6	17	CCNJ,CCNA2,CCNB1,CCNE1,CCNB2,CCNE2
Domain	IPR004367	Cyclin_C-dom		InterPro	6.055e-07	0.001127	3.314e-05	0.0002687	6	17	CCNJ,CCNA2,CCNB1,CCNE1,CCNB2,CCNE2
Domain	IPR017995	Homeobox_antennapedia		InterPro	2.122e-06	0.003949	0.0001128	0.0009145	5	12	HOXA5,HOXA6,HOXA7,HOXC4,HOXD4
Domain	1.10.10.10	-		Gene3D	7.867e-06	0.01464	0.0003882	0.003147	16	218	ETV1,ETV4,ETV5,BLM,HSF2,FOXC1,FOXD1,FOXM1,DEPDC1,E2F5,RGS7,E2F8,SMARCC1,PAX2,CDC6,KDM1A
Domain	IPR006715	ETS_PEA3_N		InterPro	7.926e-06	0.01475	0.0003882	0.003147	3	3	ETV1,ETV4,ETV5
Domain	PF04621	ETS_PEA3_N		Pfam	7.926e-06	0.01475	0.0003882	0.003147	3	3	ETV1,ETV4,ETV5
Domain	1.10.472.10	-		Gene3D	1.219e-05	0.02269	0.0005817	0.004715	7	40	CDK5R1,CCNJ,CCNA2,CCNB1,CCNE1,CCNB2,CCNE2
Domain	PS00292	CYCLINS		PROSITE	1.532e-05	0.02851	0.0007128	0.005778	6	28	CCNJ,CCNA2,CCNB1,CCNE1,CCNB2,CCNE2
Domain	IPR027417	P-loop_NTPase		InterPro	1.607e-05	0.0299	0.0007293	0.005912	36	849	KIF18A,DLG5,BRIP1,CENPE,MYO10,KIF4A,MCM2,MCM3,MCM4,MCM6,MCM7,TRIP13,SEPTIN6,BLM,KIF15,RAD54B,ASPM,KIF14,PARPBP,DNA2,KIF11,KIFC1,KIF2C,RAD51,KIF23,SMC4,CHD7,MSH2,RFC3,RFC4,ATAD2,KIF20A,MSH6,CDC6,KIF18B,HELLS
Domain	IPR011991	WHTH_DNA-bd_dom		InterPro	3.028e-05	0.05635	0.001342	0.01088	16	243	ETV1,ETV4,ETV5,BLM,HSF2,FOXC1,FOXD1,FOXM1,DEPDC1,E2F5,RGS7,E2F8,SMARCC1,PAX2,CDC6,KDM1A
Domain	PF00134	Cyclin_N		Pfam	4.142e-05	0.07708	0.001752	0.0142	6	33	CCNJ,CCNA2,CCNB1,CCNE1,CCNB2,CCNE2
Domain	IPR006671	Cyclin_N		InterPro	4.142e-05	0.07708	0.001752	0.0142	6	33	CCNJ,CCNA2,CCNB1,CCNE1,CCNB2,CCNE2
Domain	IPR000539	Frizzled		InterPro	4.52e-05	0.08411	0.00179	0.01451	4	11	FZD7,FZD3,FZD10,FZD2
Domain	PF01534	Frizzled		Pfam	4.52e-05	0.08411	0.00179	0.01451	4	11	FZD7,FZD3,FZD10,FZD2
Domain	SM01330	Frizzled		SMART	4.52e-05	0.08411	0.00179	0.01451	4	11	FZD7,FZD3,FZD10,FZD2
Domain	SM00385	CYCLIN		SMART	9.496e-05	0.1767	0.003682	0.02984	6	38	CCNJ,CCNA2,CCNB1,CCNE1,CCNB2,CCNE2
Domain	IPR001357	BRCT_dom		InterPro	0.0002027	0.3772	0.007697	0.0624	5	28	BARD1,BRCA1,DBF4,ECT2,SMARCC1
Domain	IPR015526	Frizzled/SFRP		InterPro	0.0002304	0.4288	0.008575	0.06951	4	16	FZD7,FZD3,FZD10,FZD2
Domain	IPR032454	Histone_H2A_C		InterPro	0.0002966	0.5519	0.01061	0.08604	4	17	H2AW,MACROH2A2,H2AX,H2AZ1
Domain	PF16211	Histone_H2A_C		Pfam	0.0002966	0.5519	0.01061	0.08604	4	17	H2AW,MACROH2A2,H2AX,H2AZ1
Domain	PS51489	BUB1_N		PROSITE	0.0004013	0.7468	0.01074	0.08702	2	2	BUB1,BUB1B
Domain	SM01084	CKS		SMART	0.0004013	0.7468	0.01074	0.08702	2	2	CKS1B,CKS2
Domain	IPR027696	Lamin_B		InterPro	0.0004013	0.7468	0.01074	0.08702	2	2	LMNB2,LMNB1
Domain	IPR015661	Bub1/Mad3		InterPro	0.0004013	0.7468	0.01074	0.08702	2	2	BUB1,BUB1B
Domain	PS51793	MIS18		PROSITE	0.0004013	0.7468	0.01074	0.08702	2	2	OIP5,MIS18A
Domain	PF01111	CKS		Pfam	0.0004013	0.7468	0.01074	0.08702	2	2	CKS1B,CKS2
Domain	IPR028858	Cyclin_E		InterPro	0.0004013	0.7468	0.01074	0.08702	2	2	CCNE1,CCNE2
Domain	PF08311	Mad3_BUB1_I		Pfam	0.0004013	0.7468	0.01074	0.08702	2	2	BUB1,BUB1B
Domain	IPR000789	Cyclin-dep_kinase_reg-sub		InterPro	0.0004013	0.7468	0.01074	0.08702	2	2	CKS1B,CKS2
Domain	SM00777	Mad3_BUB1_I		SMART	0.0004013	0.7468	0.01074	0.08702	2	2	BUB1,BUB1B
Domain	PS00944	CKS_1		PROSITE	0.0004013	0.7468	0.01074	0.08702	2	2	CKS1B,CKS2
Domain	PS00945	CKS_2		PROSITE	0.0004013	0.7468	0.01074	0.08702	2	2	CKS1B,CKS2
Domain	PF15908	HMMR_C		Pfam	0.0004013	0.7468	0.01074	0.08702	2	2	HMMR,KIF15
Domain	IPR013212	Mad3/Bub1_I		InterPro	0.0004013	0.7468	0.01074	0.08702	2	2	BUB1,BUB1B
Domain	3.30.170.10	-		Gene3D	0.0004013	0.7468	0.01074	0.08702	2	2	CKS1B,CKS2
Domain	IPR031794	HMMR_C		InterPro	0.0004013	0.7468	0.01074	0.08702	2	2	HMMR,KIF15
Domain	IPR004910	Yippee/Mis18/Cereblon		InterPro	0.0004038	0.7515	0.01074	0.08702	3	8	OIP5,YPEL1,MIS18A
Domain	PF03226	Yippee-Mis18		Pfam	0.0004038	0.7515	0.01074	0.08702	3	8	OIP5,YPEL1,MIS18A
Domain	PF00533	BRCT		Pfam	0.0004681	0.8711	0.01227	0.09945	4	19	BARD1,BRCA1,DBF4,ECT2
Domain	SM00063	FRI		SMART	0.000576	1	0.01489	0.1207	4	20	FZD7,FZD3,FZD10,FZD2
Domain	PS50118	HMG_BOX_2		PROSITE	0.0006804	1	0.01711	0.1387	6	54	SOX11,HMGB2,HMGB3,NSD2,WDHD1,TCF7L1
Domain	SM00398	HMG		SMART	0.0006804	1	0.01711	0.1387	6	54	SOX11,HMGB2,HMGB3,NSD2,WDHD1,TCF7L1
Domain	1.10.2000.10	-		Gene3D	0.0007004	1	0.01738	0.1409	4	21	FZD7,FZD3,FZD10,FZD2
Domain	1.10.30.10	-		Gene3D	0.0007511	1	0.01839	0.1491	6	55	SOX11,HMGB2,HMGB3,NSD2,WDHD1,TCF7L1
Domain	SM00292	BRCT		SMART	0.0008428	1	0.02037	0.1651	4	22	BARD1,BRCA1,DBF4,ECT2
Domain	PF00013	KH_1		Pfam	0.0008798	1	0.02099	0.1702	5	38	MEX3C,PCBP4,NOVA1,MEX3D,IGF2BP2
Domain	3.30.1370.10	-		Gene3D	0.0009929	1	0.02244	0.1819	5	39	MEX3C,PCBP4,NOVA1,MEX3D,IGF2BP2
Domain	SM00414	H2A		SMART	0.001004	1	0.02244	0.1819	4	23	H2AW,MACROH2A2,H2AX,H2AZ1
Domain	3.40.50.10190	-		Gene3D	0.001004	1	0.02244	0.1819	4	23	BARD1,BRCA1,DBF4,ECT2
Domain	IPR002119	Histone_H2A		InterPro	0.001004	1	0.02244	0.1819	4	23	H2AW,MACROH2A2,H2AX,H2AZ1
Domain	IPR004087	KH_dom		InterPro	0.001117	1	0.02244	0.1819	5	40	MEX3C,PCBP4,NOVA1,MEX3D,IGF2BP2
Domain	SM00322	KH		SMART	0.001117	1	0.02244	0.1819	5	40	MEX3C,PCBP4,NOVA1,MEX3D,IGF2BP2
Domain	IPR021918	DUF3528		InterPro	0.001164	1	0.02244	0.1819	2	3	HOXA11,HOXD11
Domain	PF01624	MutS_I		Pfam	0.001164	1	0.02244	0.1819	2	3	MSH2,MSH6
Domain	IPR019974	XPG_CS		InterPro	0.001164	1	0.02244	0.1819	2	3	FEN1,EXO1
Domain	IPR000751	MPI_Phosphatase		InterPro	0.001164	1	0.02244	0.1819	2	3	CDC25A,CDC25C
Domain	IPR028288	SCAR/WAVE_fam		InterPro	0.001164	1	0.02244	0.1819	2	3	WASF3,WASF1
Domain	IPR030616	Aur		InterPro	0.001164	1	0.02244	0.1819	2	3	AURKA,AURKB
Domain	IPR007695	DNA_mismatch_repair_MutS-lik_N		InterPro	0.001164	1	0.02244	0.1819	2	3	MSH2,MSH6
Domain	PF06617	M-inducer_phosp		Pfam	0.001164	1	0.02244	0.1819	2	3	CDC25A,CDC25C
Domain	PF12045	DUF3528		Pfam	0.001164	1	0.02244	0.1819	2	3	HOXA11,HOXD11
Domain	IPR017967	HMG_boxA_CS		InterPro	0.001164	1	0.02244	0.1819	2	3	HMGB2,HMGB3
Domain	IPR020067	Frizzled_dom		InterPro	0.001187	1	0.02244	0.1819	4	24	FZD7,FZD3,FZD10,FZD2
Domain	PS50038	FZ		PROSITE	0.001187	1	0.02244	0.1819	4	24	FZD7,FZD3,FZD10,FZD2
Domain	PF01392	Fz		Pfam	0.001187	1	0.02244	0.1819	4	24	FZD7,FZD3,FZD10,FZD2
[truncated: 58,201 more rows]
