# Supplementary material for: Characterization of Continuous Transcriptional Heterogeneity in High-Risk Blastemal-Type Wilms’ Tumors Using Unsupervised Machine Learning
Source: Int J Mol Sci. 2023 Feb 9;24(4):3532. doi: 10.3390/ijms24043532 (PMC9965420; doi:10.3390/ijms24043532)
Supplement: Supplementary file 1 [file ijms-24-03532-s001.zip › Table S7 - GO enrichment topic1_epi.xlsx]

## Sheet: Genes list
k1
ACADL
ACE2
ACPP
ACSM3
ADGRG1
ADH6
AFDN-DT
AFM
AGMAT
ALDH8A1
ALDOB
ANGPTL3
ANXA3
AOC1
APOM
ARG2
ARSE
ASS1
ATP6V0A4
AZGP1
BBOX1
BHMT
BHMT2
C1orf115
C21orf62
C4orf19
CA10
CALB1
CCDC198
CCN6
CDH1
CDH16
CDH6
CDS1
CHL1
CLDN10
CLDN8
CLEC4M
CLIC5
CLU
COBL
COBLL1
COL4A3
COL4A4
CRYAB
CTXND1
CUBN
CWH43
CXCL14
CYP24A1
CYP3A5
CYP4F3
DEFB1
DIO1
DIRAS2
DNAJC6
DPYS
DSC1
EGF
EGOT
EHHADH
EMX2
EPHX2
ERBB3
ERBB4
ESRRG
EXPH5
FABP1
FGB
FGF9
FGFR3
FLRT3
FMO1
FMO5
FRK
FXYD2
G6PC
GABRA2
GAD1
GALNT14
GBA3
GIPC2
GLDC
GLYAT
GPC5
GPM6A
GPX3
GRAMD1C
GRB14
GULP1
HAO2
HGD
HMGCS2
HPD
HSD11B2
HSD17B2
HYAL1
IL17RB
KCNJ1
KCNJ16
KIAA0895
KL
KNG1
KRT7
LGALS2
LHX1
LINC00472
LRP2
LRRC19
LRRC2
MAL
MAOA
MAOB
MAP7
MFAP3L
MGAM
MME
MST1L
MTTP
NAP1L2
NEBL
NELL1
NLGN1
NOX4
NPHS1
NPHS2
NR1H4
NR3C2
NUP62CL
OGDHL
PBLD
PCK1
PCP4
PDZK1
PDZK1IP1
PIP5K1B
PIPOX
PLG
PLPPR1
PLS1
PPARGC1A
PPP1R1A
PRODH2
PVALB
RALYL
RAP1GAP
RBP4
REN
RETREG1
RGN
RNF128
S100A2
SBSPON
SERPINA5
SH3GL2
SHANK2
SIM1
SLC10A2
SLC12A1
SLC13A1
SLC13A3
SLC14A1
SLC15A2
SLC16A4
SLC17A1
SLC17A3
SLC22A2
SLC22A5
SLC26A4
SLC27A2
SLC2A2
SLC3A1
SLC44A4
SLC4A1
SLC4A4
SLC5A12
SLC7A9
SLCO4C1
SOSTDC1
SPINK1
SULT1C2
TACSTD2
TFAP2A
TFAP2B
TOM1L1
TOX3
TRHDE
TRPM3
TSPAN1
TSPAN12
TSPAN8
TYRP1
UGT2A3
UGT2B28
UMOD
UPB1
ZNF204P

## Sheet: Toppgene results
Category	ID	Name	Selected refined	Selected	Source	p-value	q-value Bonferroni	q-value FDR B&H	q-value FDR B&Y	Hit Count in Query List	Hit Count in Genome	Hit in Query List
GO: Molecular Function	GO:0008509	anion transmembrane transporter activity		1		1.49e-11	1.12e-08	1.12e-08	8.03e-08	25	482	SLC17A3,AZGP1,SLC26A4,CLIC5,SLC5A12,SLC27A2,RBP4,SLC13A3,SLC44A4,SLC2A2,SLC3A1,SLC4A1,SLC7A9,SLC10A2,SLC12A1,SLCO4C1,SLC13A1,SLC16A4,SLC14A1,SLC15A2,SLC17A1,SLC22A2,SLC22A5,SLC4A4,GABRA2
GO: Molecular Function	GO:0005215	transporter activity	1	1		1.86e-08	1.39e-05	6.95e-06	5e-05	36	1301	SLC17A3,AZGP1,SLC26A4,FABP1,APOM,CLIC5,TRPM3,KCNJ1,KCNJ16,SLC5A12,SLC27A2,GPM6A,RBP4,SLC13A3,SLC44A4,SLC2A2,SLC3A1,SLC4A1,SLC7A9,SLC10A2,SLC12A1,SLCO4C1,SLC13A1,SLC16A4,SLC14A1,SLC15A2,SLC17A1,SLC22A2,SLC22A5,ATP6V0A4,MTTP,LRP2,SLC4A4,FXYD2,GRAMD1C,GABRA2
GO: Molecular Function	GO:0015075	ion transmembrane transporter activity	1	1		3.94e-08	2.95e-05	9.83e-06	7.07e-05	31	1039	SLC17A3,AZGP1,SLC26A4,CLIC5,TRPM3,KCNJ1,KCNJ16,SLC5A12,SLC27A2,GPM6A,RBP4,SLC13A3,SLC44A4,SLC2A2,SLC3A1,SLC4A1,SLC7A9,SLC10A2,SLC12A1,SLCO4C1,SLC13A1,SLC16A4,SLC14A1,SLC15A2,SLC17A1,SLC22A2,SLC22A5,ATP6V0A4,SLC4A4,FXYD2,GABRA2
GO: Molecular Function	GO:0016491	oxidoreductase activity				7.05e-08	5.28e-05	1.32e-05	9.5e-05	26	783	HGD,AOC1,MAOA,ACADL,MAOB,CYP3A5,CYP24A1,ALDH8A1,PIPOX,ADH6,TYRP1,PRODH2,HPD,GLDC,DIO1,HSD11B2,HSD17B2,BBOX1,FMO1,FMO5,GPX3,NOX4,EHHADH,OGDHL,CYP4F3,HAO2
GO: Molecular Function	GO:0015291	secondary active transmembrane transporter activity				1.47e-07	0.00011	2.19e-05	0.000158	14	242	SLC17A3,SLC26A4,SLC5A12,SLC13A3,SLC4A1,SLC10A2,SLC12A1,SLCO4C1,SLC13A1,SLC16A4,SLC15A2,SLC17A1,SLC22A5,SLC4A4
GO: Molecular Function	GO:0015293	symporter activity		1		2.09e-07	0.000156	2.6e-05	0.000187	11	144	SLC17A3,SLC5A12,SLC13A3,SLC10A2,SLC12A1,SLC13A1,SLC16A4,SLC15A2,SLC17A1,SLC22A5,SLC4A4
GO: Molecular Function	GO:0008514	organic anion transmembrane transporter activity		1		3.06e-07	0.000229	3.04e-05	0.000219	12	183	SLC17A3,SLC26A4,SLC5A12,SLC13A3,SLC44A4,SLC2A2,SLC3A1,SLC4A1,SLC7A9,SLCO4C1,SLC22A2,SLC4A4
GO: Molecular Function	GO:0022853	active ion transmembrane transporter activity		1		3.25e-07	0.000243	3.04e-05	0.000219	13	220	SLC17A3,SLC26A4,SLC5A12,SLC13A3,SLC4A1,SLC10A2,SLC12A1,SLCO4C1,SLC13A1,SLC15A2,SLC17A1,SLC22A2,SLC4A4
GO: Molecular Function	GO:0015318	inorganic molecular entity transmembrane transporter activity		1		4.96e-07	0.000371	4.12e-05	0.000297	27	924	SLC17A3,SLC26A4,CLIC5,TRPM3,KCNJ1,KCNJ16,SLC5A12,SLC27A2,GPM6A,RBP4,SLC13A3,SLC44A4,SLC3A1,SLC4A1,SLC7A9,SLC10A2,SLC12A1,SLC13A1,SLC16A4,SLC14A1,SLC15A2,SLC17A1,SLC22A2,ATP6V0A4,SLC4A4,FXYD2,GABRA2
GO: Molecular Function	GO:0022804	active transmembrane transporter activity		1		6.64e-07	0.000498	4.98e-05	0.000358	15	316	SLC17A3,SLC26A4,SLC5A12,SLC13A3,SLC4A1,SLC10A2,SLC12A1,SLCO4C1,SLC13A1,SLC16A4,SLC15A2,SLC17A1,SLC22A2,SLC22A5,SLC4A4
GO: Molecular Function	GO:0022857	transmembrane transporter activity		1		7.37e-07	0.000552	5.02e-05	0.000361	31	1187	SLC17A3,AZGP1,SLC26A4,CLIC5,TRPM3,KCNJ1,KCNJ16,SLC5A12,SLC27A2,GPM6A,RBP4,SLC13A3,SLC44A4,SLC2A2,SLC3A1,SLC4A1,SLC7A9,SLC10A2,SLC12A1,SLCO4C1,SLC13A1,SLC16A4,SLC14A1,SLC15A2,SLC17A1,SLC22A2,SLC22A5,ATP6V0A4,SLC4A4,FXYD2,GABRA2
GO: Molecular Function	GO:0015370	solute:sodium symporter activity		1		8.73e-07	0.000654	5.45e-05	0.000392	8	76	SLC17A3,SLC5A12,SLC13A3,SLC10A2,SLC12A1,SLC13A1,SLC17A1,SLC4A4
GO: Molecular Function	GO:0015294	solute:cation symporter activity		1		9.58e-07	0.000718	5.52e-05	0.000397	9	104	SLC17A3,SLC5A12,SLC13A3,SLC10A2,SLC12A1,SLC13A1,SLC15A2,SLC17A1,SLC4A4
GO: Molecular Function	GO:0005496	steroid binding				2.4e-06	0.0018	0.000128	0.000924	9	116	ESRRG,KL,NR3C2,HSD11B2,NR1H4,CALB1,SLC22A2,MTTP,GRAMD1C
GO: Molecular Function	GO:1901682	sulfur compound transmembrane transporter activity				8.75e-06	0.00655	0.000437	0.00314	6	49	SLC26A4,SLC13A3,SLC44A4,SLC3A1,SLC7A9,SLC13A1
GO: Molecular Function	GO:0008131	primary amine oxidase activity				1.89e-05	0.0142	0.000886	0.00638	3	6	AOC1,MAOA,MAOB
GO: Molecular Function	GO:0050660	flavin adenine dinucleotide binding				2.21e-05	0.0165	0.000972	0.007	7	85	MAOA,ACADL,MAOB,PRODH2,FMO1,FMO5,NOX4
GO: Molecular Function	GO:0046943	carboxylic acid transmembrane transporter activity				3.26e-05	0.0244	0.00135	0.00971	9	160	SLC26A4,SLC5A12,SLC27A2,SLC13A3,SLC3A1,SLC7A9,SLC10A2,SLC16A4,SLC22A2
GO: Molecular Function	GO:0005342	organic acid transmembrane transporter activity				3.42e-05	0.0256	0.00135	0.00971	9	161	SLC26A4,SLC5A12,SLC27A2,SLC13A3,SLC3A1,SLC7A9,SLC10A2,SLC16A4,SLC22A2
GO: Molecular Function	GO:0015103	inorganic anion transmembrane transporter activity				3.96e-05	0.0296	0.00144	0.0104	9	164	SLC17A3,SLC26A4,CLIC5,SLC4A1,SLC12A1,SLC13A1,SLC17A1,SLC4A4,GABRA2
GO: Molecular Function	GO:0016638	oxidoreductase activity, acting on the CH-NH2 group of donors				4.05e-05	0.0303	0.00144	0.0104	4	20	AOC1,MAOA,MAOB,GLDC
GO: Molecular Function	GO:0072349	modified amino acid transmembrane transporter activity				7.23e-05	0.0541	0.00246	0.0177	4	23	SLC13A3,SLC3A1,SLC7A9,SLC22A5
GO: Molecular Function	GO:0047150	betaine-homocysteine S-methyltransferase activity				9.93e-05	0.0744	0.00323	0.0233	2	2	BHMT,BHMT2
GO: Molecular Function	GO:0008289	lipid binding				0.000109	0.0817	0.00341	0.0245	21	846	MAL,NUP62CL,ESRRG,FABP1,APOM,KL,AFM,KCNJ1,NR3C2,MME,HSD11B2,ALDOB,NR1H4,CALB1,ANXA3,SH3GL2,RBP4,SLC22A2,MTTP,GRAMD1C,SERPINA5
GO: Molecular Function	GO:0015081	sodium ion transmembrane transporter activity				0.000139	0.104	0.00415	0.0299	9	193	SLC17A3,SLC5A12,SLC13A3,SLC10A2,SLC12A1,SLC13A1,SLC17A1,SLC4A4,FXYD2
GO: Molecular Function	GO:0019842	vitamin binding				0.000149	0.112	0.00417	0.03	8	153	GAD1,KL,GLDC,AFM,CALB1,RBP4,CUBN,OGDHL
GO: Molecular Function	GO:0030492	hemoglobin binding				0.000151	0.113	0.00417	0.03	3	11	CUBN,SLC4A1,LRP2
GO: Molecular Function	GO:0008324	cation transmembrane transporter activity				0.000316	0.237	0.00839	0.0604	18	720	SLC17A3,TRPM3,KCNJ1,KCNJ16,SLC5A12,GPM6A,SLC13A3,SLC44A4,SLC10A2,SLC12A1,SLC13A1,SLC15A2,SLC17A1,SLC22A2,SLC22A5,ATP6V0A4,SLC4A4,FXYD2
GO: Molecular Function	GO:0015926	glucosidase activity				0.000325	0.243	0.00839	0.0604	3	14	KL,MGAM,GBA3
GO: Molecular Function	GO:0046914	transition metal ion binding				0.000366	0.274	0.009	0.0647	24	1130	UPB1,AOC1,CYP3A5,CYP24A1,ESRRG,CA10,BHMT,S100A2,ADH6,AFM,BHMT2,NR3C2,MME,BBOX1,KNG1,NR1H4,TRHDE,DPYS,CALB1,ARG2,ACE2,RGN,CYP4F3,PCK1
GO: Molecular Function	GO:0005319	lipid transporter activity				0.000372	0.279	0.009	0.0647	8	175	FABP1,APOM,SLC27A2,RBP4,SLC13A3,SLC10A2,MTTP,GRAMD1C
GO: Molecular Function	GO:0008201	heparin binding				0.000466	0.349	0.0109	0.0785	8	181	AOC1,ADGRG1,CCN6,NELL1,ANGPTL3,FGF9,KNG1,SERPINA5
GO: Molecular Function	GO:0016641	oxidoreductase activity, acting on the CH-NH2 group of donors, oxygen as acceptor				0.000492	0.369	0.0112	0.0804	3	16	AOC1,MAOA,MAOB
GO: Molecular Function	GO:0052642	lysophosphatidic acid phosphatase activity				0.000582	0.436	0.0125	0.0897	2	4	EPHX2,ACP3
GO: Molecular Function	GO:0015184	L-cystine transmembrane transporter activity				0.000582	0.436	0.0125	0.0897	2	4	SLC3A1,SLC7A9
GO: Molecular Function	GO:0005509	calcium ion binding				0.000728	0.545	0.0152	0.109	18	773	PCP4,AOC1,CLEC4M,S100A2,NELL1,PVALB,UMOD,PLS1,CALB1,DSC1,ANXA3,CUBN,RGN,EGF,LRP2,CDH1,CDH6,CDH16
GO: Molecular Function	GO:1901681	sulfur compound binding				0.000765	0.573	0.0155	0.111	10	295	AOC1,ACADL,ADGRG1,CCN6,NELL1,ANGPTL3,FGF9,KNG1,OGDHL,SERPINA5
GO: Molecular Function	GO:0004499	N,N-dimethylaniline monooxygenase activity				0.000964	0.722	0.0183	0.132	2	5	FMO1,FMO5
GO: Molecular Function	GO:0015136	sialic acid transmembrane transporter activity				0.000964	0.722	0.0183	0.132	2	5	SLC17A3,SLC17A1
GO: Molecular Function	GO:0004497	monooxygenase activity				0.000979	0.733	0.0183	0.132	6	114	CYP3A5,CYP24A1,TYRP1,FMO1,FMO5,CYP4F3
GO: Molecular Function	GO:0015106	bicarbonate transmembrane transporter activity				0.00113	0.844	0.0206	0.148	3	21	SLC26A4,SLC4A1,SLC4A4
GO: Molecular Function	GO:0031406	carboxylic acid binding				0.00134	1	0.0239	0.172	9	264	GAD1,FABP1,GLDC,AFM,NR1H4,DPYS,ASS1,SERPINA5,PCK1
GO: Molecular Function	GO:0015220	choline transmembrane transporter activity				0.00144	1	0.0245	0.176	2	6	SLC44A4,SLC22A2
GO: Molecular Function	GO:0008422	beta-glucosidase activity				0.00144	1	0.0245	0.176	2	6	KL,GBA3
GO: Molecular Function	GO:0046873	metal ion transmembrane transporter activity				0.00186	1	0.0308	0.222	13	511	SLC17A3,TRPM3,KCNJ1,KCNJ16,SLC5A12,GPM6A,SLC13A3,SLC10A2,SLC12A1,SLC13A1,SLC17A1,SLC4A4,FXYD2
GO: Molecular Function	GO:0015101	organic cation transmembrane transporter activity				0.00189	1	0.0308	0.222	3	25	SLC44A4,SLC22A2,SLC22A5
GO: Molecular Function	GO:0038132	neuregulin binding				0.002	1	0.0311	0.224	2	7	ERBB3,ERBB4
GO: Molecular Function	GO:0008172	S-methyltransferase activity				0.002	1	0.0311	0.224	2	7	BHMT,BHMT2
GO: Molecular Function	GO:0016705	oxidoreductase activity, acting on paired donors, with incorporation or reduction of molecular oxygen				0.00206	1	0.0311	0.224	7	178	CYP3A5,CYP24A1,TYRP1,BBOX1,FMO1,FMO5,CYP4F3
GO: Molecular Function	GO:0008270	zinc ion binding				0.00208	1	0.0311	0.224	18	849	UPB1,AOC1,ESRRG,CA10,BHMT,ADH6,AFM,BHMT2,NR3C2,MME,BBOX1,KNG1,NR1H4,TRHDE,DPYS,CALB1,ACE2,RGN
GO: Molecular Function	GO:0000099	sulfur amino acid transmembrane transporter activity				0.00265	1	0.0389	0.28	2	8	SLC3A1,SLC7A9
GO: Molecular Function	GO:0042887	amide transmembrane transporter activity				0.00281	1	0.0405	0.292	4	59	AZGP1,SLC13A3,SLC14A1,SLC15A2
GO: Molecular Function	GO:0005343	organic acid:sodium symporter activity				0.00292	1	0.0405	0.292	3	29	SLC5A12,SLC13A3,SLC10A2
GO: Molecular Function	GO:0005104	fibroblast growth factor receptor binding				0.00292	1	0.0405	0.292	3	29	KL,FGF9,FLRT3
GO: Molecular Function	GO:0022890	inorganic cation transmembrane transporter activity				0.00305	1	0.0416	0.299	15	673	SLC17A3,TRPM3,KCNJ1,KCNJ16,SLC5A12,GPM6A,SLC13A3,SLC10A2,SLC12A1,SLC13A1,SLC15A2,SLC17A1,ATP6V0A4,SLC4A4,FXYD2
GO: Molecular Function	GO:0015179	L-amino acid transmembrane transporter activity				0.00318	1	0.0424	0.305	4	61	SLC13A3,SLC3A1,SLC7A9,SLC22A2
GO: Molecular Function	GO:0090482	vitamin transmembrane transporter activity				0.00322	1	0.0424	0.305	3	30	RBP4,SLC44A4,SLC2A2
GO: Molecular Function	GO:0019534	toxin transmembrane transporter activity				0.00338	1	0.0429	0.309	2	9	SLC17A3,SLC22A2
GO: Molecular Function	GO:0005499	vitamin D binding				0.00338	1	0.0429	0.309	2	9	KL,CALB1
GO: Molecular Function	GO:0042910	xenobiotic transmembrane transporter activity				0.00354	1	0.0442	0.318	3	31	SLC17A3,SLC22A2,SLC22A5
GO: Molecular Function	GO:0005539	glycosaminoglycan binding				0.0038	1	0.0467	0.336	8	252	AOC1,ADGRG1,CCN6,NELL1,ANGPTL3,FGF9,KNG1,SERPINA5
GO: Biological Process	GO:0006082	organic acid metabolic process				1.64e-17	6.52e-14	6.52e-14	5.78e-13	46	1130	EPHX2,GLYAT,HGD,GAD1,UPB1,ACADL,SLC17A3,CYP3A5,CYP24A1,ALDH8A1,PIPOX,FABP1,BHMT,ADH6,TYRP1,PPARGC1A,PRODH2,ACSM3,SULT1C2,HPD,GLDC,BHMT2,ANGPTL3,DIO1,UMOD,UGT2B28,ALDOB,NR1H4,SLC27A2,DPYS,FMO1,NOX4,SLC4A1,ARG2,RGN,SLC17A1,EHHADH,UGT2A3,ASS1,AGMAT,OGDHL,CYP4F3,SLC4A4,G6PC1,HAO2,PCK1
GO: Biological Process	GO:0043436	oxoacid metabolic process				2.43e-14	9.65e-11	4.83e-11	4.28e-10	41	1098	EPHX2,GLYAT,HGD,GAD1,UPB1,ACADL,CYP3A5,CYP24A1,ALDH8A1,PIPOX,FABP1,BHMT,ADH6,TYRP1,PPARGC1A,PRODH2,ACSM3,SULT1C2,HPD,GLDC,BHMT2,ANGPTL3,DIO1,UGT2B28,ALDOB,NR1H4,SLC27A2,DPYS,NOX4,SLC4A1,ARG2,RGN,EHHADH,UGT2A3,ASS1,AGMAT,OGDHL,CYP4F3,SLC4A4,HAO2,PCK1
GO: Biological Process	GO:0019752	carboxylic acid metabolic process				4.29e-14	1.71e-10	5.69e-11	5.04e-10	40	1064	EPHX2,GLYAT,HGD,GAD1,UPB1,ACADL,CYP3A5,CYP24A1,ALDH8A1,PIPOX,FABP1,BHMT,ADH6,TYRP1,PPARGC1A,PRODH2,ACSM3,HPD,GLDC,BHMT2,ANGPTL3,DIO1,UGT2B28,ALDOB,NR1H4,SLC27A2,DPYS,NOX4,SLC4A1,ARG2,RGN,EHHADH,UGT2A3,ASS1,AGMAT,OGDHL,CYP4F3,SLC4A4,HAO2,PCK1
GO: Biological Process	GO:0072001	renal system development				4.32e-12	1.72e-08	4.3e-09	3.81e-08	22	360	ERBB4,NPHS2,KCNJ1,UMOD,MME,NPHS1,COL4A3,COL4A4,CALB1,RBP4,REN,SIM1,TFAP2A,TFAP2B,ARG2,LHX1,RGN,SLC12A1,ASS1,LRP2,EMX2,TACSTD2
GO: Biological Process	GO:0001655	urogenital system development				4.51e-11	1.8e-07	3.59e-08	3.19e-07	22	406	ERBB4,NPHS2,KCNJ1,UMOD,MME,NPHS1,COL4A3,COL4A4,CALB1,RBP4,REN,SIM1,TFAP2A,TFAP2B,ARG2,LHX1,RGN,SLC12A1,ASS1,LRP2,EMX2,TACSTD2
GO: Biological Process	GO:0001822	kidney development		1		1.22e-10	4.87e-07	6.63e-08	5.88e-07	20	347	ERBB4,NPHS2,KCNJ1,UMOD,MME,NPHS1,COL4A3,COL4A4,CALB1,REN,SIM1,TFAP2A,TFAP2B,ARG2,LHX1,RGN,SLC12A1,ASS1,LRP2,TACSTD2
GO: Biological Process	GO:0015711	organic anion transport		1		1.3e-10	5.17e-07	6.63e-08	5.88e-07	22	429	SLC17A3,SLC26A4,UMOD,SLC5A12,NR1H4,RBP4,SLC13A3,SLC44A4,SLC2A2,SLC3A1,SLC4A1,ARG2,SLC7A9,ACE2,SLC10A2,SLCO4C1,SLC16A4,SLC17A1,SLC22A2,MTTP,LRP2,SLC4A4
GO: Biological Process	GO:1901605	alpha-amino acid metabolic process				1.33e-10	5.31e-07	6.63e-08	5.88e-07	16	207	GLYAT,HGD,GAD1,ALDH8A1,PIPOX,BHMT,TYRP1,PRODH2,HPD,GLDC,BHMT2,NR1H4,NOX4,ARG2,ASS1,AGMAT
GO: Biological Process	GO:0098656	anion transmembrane transport		1		2.89e-10	1.15e-06	1.28e-07	1.13e-06	25	583	ERBB3,ERBB4,AZGP1,SLC26A4,CLIC5,CLU,SLC5A12,RBP4,SLC13A3,SLC44A4,SLC2A2,SLC3A1,SLC4A1,SLC7A9,ACE2,SLC12A1,SLC13A1,SLC14A1,SLC15A2,SLC17A1,SLC22A2,SLC22A5,LRP2,SLC4A4,GABRA2
GO: Biological Process	GO:0032787	monocarboxylic acid metabolic process				4.26e-10	1.69e-06	1.69e-07	1.5e-06	27	692	EPHX2,GLYAT,GAD1,ACADL,CYP3A5,CYP24A1,ALDH8A1,FABP1,ADH6,TYRP1,PPARGC1A,PRODH2,ACSM3,ANGPTL3,UGT2B28,ALDOB,NR1H4,SLC27A2,SLC4A1,RGN,EHHADH,UGT2A3,OGDHL,CYP4F3,SLC4A4,HAO2,PCK1
GO: Biological Process	GO:0006520	cellular amino acid metabolic process				7.83e-10	3.12e-06	2.83e-07	2.51e-06	19	345	GLYAT,HGD,GAD1,UPB1,ALDH8A1,PIPOX,BHMT,TYRP1,PRODH2,HPD,GLDC,BHMT2,DIO1,NR1H4,DPYS,NOX4,ARG2,ASS1,AGMAT
GO: Biological Process	GO:0006629	lipid metabolic process				1.79e-09	7.12e-06	5.93e-07	5.26e-06	40	1503	EPHX2,CDS1,ACADL,CYP3A5,CYP24A1,ALDH8A1,HMGCS2,PLPPR1,FABP1,APOM,ADH6,TYRP1,PPARGC1A,ACSM3,CLU,ANGPTL3,UMOD,PIP5K1B,FGFR3,GPC5,UGT2B28,HSD11B2,HSD17B2,NR1H4,SLC27A2,FMO5,CWH43,RBP4,CUBN,MAP7,SLC44A4,GBA3,RGN,EHHADH,MTTP,LRP2,CYP4F3,G6PC1,HAO2,PCK1
GO: Biological Process	GO:0044282	small molecule catabolic process				2.08e-09	8.27e-06	6.36e-07	5.64e-06	21	452	HGD,GAD1,UPB1,ACADL,CYP24A1,ALDH8A1,PIPOX,FABP1,PRODH2,HPD,GLDC,UMOD,ALDOB,SLC27A2,DPYS,CUBN,ARG2,EHHADH,CYP4F3,HAO2,PCK1
GO: Biological Process	GO:0044255	cellular lipid metabolic process				1.43e-08	5.71e-05	4.08e-06	3.61e-05	32	1106	EPHX2,CDS1,ACADL,CYP3A5,CYP24A1,ALDH8A1,HMGCS2,PLPPR1,FABP1,APOM,ADH6,TYRP1,PPARGC1A,ACSM3,ANGPTL3,PIP5K1B,GPC5,NR1H4,SLC27A2,CWH43,RBP4,MAP7,SLC44A4,GBA3,RGN,EHHADH,MTTP,LRP2,CYP4F3,G6PC1,HAO2,PCK1
GO: Biological Process	GO:0046395	carboxylic acid catabolic process				1.74e-08	6.91e-05	4.61e-06	4.09e-05	15	251	HGD,GAD1,ACADL,ALDH8A1,PIPOX,FABP1,PRODH2,HPD,GLDC,SLC27A2,ARG2,EHHADH,CYP4F3,HAO2,PCK1
GO: Biological Process	GO:0016054	organic acid catabolic process				3.76e-08	0.00015	9.35e-06	8.29e-05	15	266	HGD,GAD1,ACADL,ALDH8A1,PIPOX,FABP1,PRODH2,HPD,GLDC,SLC27A2,ARG2,EHHADH,CYP4F3,HAO2,PCK1
GO: Biological Process	GO:1901615	organic hydroxy compound metabolic process				8.79e-08	0.00035	2.06e-05	0.000183	22	613	EPHX2,MAOA,ACADL,MAOB,CYP3A5,CYP24A1,HMGCS2,ADH6,TYRP1,KL,ANGPTL3,DIO1,NR1H4,SLC27A2,FMO5,RBP4,CUBN,MTTP,LRP2,CYP4F3,HAO2,PCK1
GO: Biological Process	GO:0008202	steroid metabolic process				9.39e-08	0.000374	2.08e-05	0.000184	17	371	EPHX2,ACADL,CYP3A5,CYP24A1,HMGCS2,PPARGC1A,ANGPTL3,UGT2B28,HSD11B2,HSD17B2,NR1H4,SLC27A2,FMO5,CUBN,MTTP,LRP2,G6PC1
GO: Biological Process	GO:0046942	carboxylic acid transport		1		1.25e-07	0.000496	2.61e-05	0.000232	16	334	SLC17A3,SLC26A4,UMOD,SLC5A12,NR1H4,RBP4,SLC13A3,SLC3A1,ARG2,SLC7A9,ACE2,SLC10A2,SLC16A4,SLC17A1,SLC22A2,LRP2
GO: Biological Process	GO:0034220	ion transmembrane transport		1		1.66e-07	0.00066	3.3e-05	0.000293	37	1562	ERBB3,ERBB4,SLC17A3,AZGP1,SLC26A4,PDZK1,PPARGC1A,CLIC5,TRPM3,CLU,KCNJ1,KCNJ16,SLC5A12,GPM6A,RBP4,SLC13A3,NLGN1,SLC44A4,SLC2A2,SLC3A1,SLC4A1,SLC7A9,ACE2,RGN,SHANK2,SLC12A1,SLC13A1,SLC14A1,SLC15A2,SLC17A1,SLC22A2,SLC22A5,ATP6V0A4,LRP2,SLC4A4,FXYD2,GABRA2
GO: Biological Process	GO:0055085	transmembrane transport		1		2.35e-07	0.000935	4.45e-05	0.000395	40	1794	ERBB3,ERBB4,SLC17A3,AZGP1,SLC26A4,PDZK1,PPARGC1A,CLIC5,TRPM3,CLU,KCNJ1,KCNJ16,SLC5A12,GPM6A,RBP4,SLC13A3,NLGN1,SLC44A4,SLC2A2,SLC3A1,SLC4A1,SLC7A9,ACE2,RGN,SLC10A2,SHANK2,SLC12A1,SLCO4C1,SLC13A1,SLC16A4,SLC14A1,SLC15A2,SLC17A1,SLC22A2,SLC22A5,ATP6V0A4,LRP2,SLC4A4,FXYD2,GABRA2
GO: Biological Process	GO:0072006	nephron development		1		5.31e-07	0.00211	9.6e-05	0.000851	11	166	ERBB4,NPHS2,UMOD,NPHS1,COL4A3,COL4A4,CALB1,TFAP2A,TFAP2B,LHX1,TACSTD2
GO: Biological Process	GO:0072337	modified amino acid transport				7.1e-07	0.00283	0.000123	0.00109	6	34	PDZK1,SLC13A3,SLC3A1,SLC7A9,SLC22A5,LRP2
GO: Biological Process	GO:0006577	amino-acid betaine metabolic process				7.47e-07	0.00297	0.000124	0.0011	5	19	ACADL,BHMT,BHMT2,BBOX1,SLC22A5
GO: Biological Process	GO:1990961	xenobiotic detoxification by transmembrane export across the plasma membrane				1.55e-06	0.00618	0.000242	0.00215	4	10	SLC17A3,PDZK1,SLC15A2,SLC22A5
GO: Biological Process	GO:0140352	export from cell				1.58e-06	0.0063	0.000242	0.00215	35	1571	PCP4,GAD1,AOC1,MAOB,SLC17A3,EXPH5,PDZK1,ACP3,CLU,FGB,NR3C2,MME,PLG,KNG1,NR1H4,SLC27A2,MGAM,DSC1,ANXA3,RBP4,REN,NLGN1,SLC44A4,TFAP2B,SLC2A2,FRK,EGF,SLCO4C1,SLC15A2,SLC22A2,SLC22A5,MTTP,LRP2,SLC4A4,FXYD2
GO: Biological Process	GO:0006812	cation transport		1		1.94e-06	0.00773	0.000286	0.00254	32	1376	PCP4,MAOB,SLC17A3,SPINK1,PDZK1,PPARGC1A,TRPM3,KCNJ1,KCNJ16,UMOD,SLC5A12,GPM6A,SLC13A3,NLGN1,CUBN,SLC44A4,ARG2,ACE2,RGN,SLC10A2,SHANK2,SLC12A1,EGF,SLC13A1,SLC15A2,SLC17A1,SLC22A2,SLC22A5,ATP6V0A4,LRP2,SLC4A4,FXYD2
GO: Biological Process	GO:1901606	alpha-amino acid catabolic process				2.2e-06	0.00874	0.000312	0.00277	8	90	HGD,GAD1,ALDH8A1,PIPOX,PRODH2,HPD,GLDC,ARG2
GO: Biological Process	GO:0140115	export across plasma membrane		1		2.64e-06	0.0105	0.000363	0.00321	7	65	SLC17A3,PDZK1,SLC15A2,SLC22A2,SLC22A5,SLC4A4,FXYD2
GO: Biological Process	GO:0015849	organic acid transport		1		3.08e-06	0.0123	0.000409	0.00362	15	376	SLC26A4,FABP1,UMOD,SLC5A12,NR1H4,SLC27A2,RBP4,SLC13A3,SLC3A1,ARG2,SLC7A9,ACE2,SLC10A2,SLC22A2,LRP2
GO: Biological Process	GO:0006814	sodium ion transport	1	1		5.45e-06	0.0217	0.0007	0.00621	12	253	SLC17A3,KCNJ1,UMOD,SLC5A12,SLC13A3,SLC10A2,SLC12A1,SLC13A1,SLC17A1,SLC22A5,SLC4A4,FXYD2
GO: Biological Process	GO:0010842	retina layer formation				5.89e-06	0.0234	0.000712	0.00631	5	28	TSPAN12,CALB1,TFAP2A,TFAP2B,LHX1
GO: Biological Process	GO:0005975	carbohydrate metabolic process				5.9e-06	0.0235	0.000712	0.00631	20	670	PPARGC1A,KL,ANGPTL3,ALDOB,NR1H4,MGAM,HYAL1,RBP4,TFAP2B,SLC2A2,SLC3A1,SLC4A1,PPP1R1A,GBA3,RGN,EGF,OGDHL,SLC4A4,G6PC1,PCK1
GO: Biological Process	GO:0009636	response to toxic substance				6.39e-06	0.0255	0.000749	0.00664	12	257	EPHX2,GLYAT,MAOB,SLC17A3,PDZK1,FABP1,APOM,GPX3,SLC15A2,SLC22A5,ASS1,CDH1
GO: Biological Process	GO:0010876	lipid localization				7.18e-06	0.0286	0.000817	0.00724	18	564	CDS1,FABP1,APOM,CLU,ANGPTL3,NR1H4,SLC27A2,GULP1,RBP4,SLC13A3,REN,SLC3A1,SLC4A1,SLC10A2,EGF,MTTP,GRAMD1C,SERPINA5
GO: Biological Process	GO:0009063	cellular amino acid catabolic process				7.51e-06	0.0299	0.000831	0.00737	8	106	HGD,GAD1,ALDH8A1,PIPOX,PRODH2,HPD,GLDC,ARG2
GO: Biological Process	GO:0015850	organic hydroxy compound transport				9.3e-06	0.037	0.000978	0.00867	13	313	PCP4,MAOB,APOM,CLU,SLC5A12,NR1H4,RBP4,REN,SLC10A2,EGF,SLC22A2,MTTP,GRAMD1C
GO: Biological Process	GO:0072348	sulfur compound transport	1	1		9.34e-06	0.0372	0.000978	0.00867	6	52	SLC26A4,SLC13A3,SLC44A4,SLC3A1,SLC7A9,SLC13A1
GO: Biological Process	GO:0046415	urate metabolic process				9.72e-06	0.0387	0.000992	0.0088	4	15	SLC17A3,UMOD,SLC17A1,G6PC1
GO: Biological Process	GO:0003013	circulatory system process				1.22e-05	0.0485	0.00121	0.0108	20	704	EPHX2,KL,ACSM3,FGB,MME,HSD11B2,KNG1,TRHDE,COL4A3,SH3GL2,NOX4,SLC13A3,REN,ACE2,SLC15A2,SLC22A2,SLC22A5,LRP2,SLC4A4,FXYD2
GO: Biological Process	GO:0007588	excretion				1.26e-05	0.0502	0.00122	0.0108	7	82	NPHS2,KCNJ1,UMOD,NR3C2,NPHS1,SLC12A1,ATP6V0A4
GO: Biological Process	GO:0042133	neurotransmitter metabolic process				1.59e-05	0.0634	0.00151	0.0134	5	34	GAD1,MAOA,MAOB,SLC44A4,SLC22A2
GO: Biological Process	GO:0072073	kidney epithelium development				2.09e-05	0.0833	0.00194	0.0172	9	159	NPHS2,UMOD,NPHS1,CALB1,SIM1,TFAP2B,ARG2,LHX1,TACSTD2
GO: Biological Process	GO:1901565	organonitrogen compound catabolic process				2.23e-05	0.0888	0.00202	0.0179	30	1405	HGD,GAD1,UPB1,MAOA,ACADL,MAOB,CYP3A5,ALDH8A1,PIPOX,BHMT,NELL1,PRODH2,CLU,HPD,GLDC,UMOD,GPC5,PLG,RNF128,TRHDE,DPYS,HYAL1,TOM1L1,CUBN,ARG2,GBA3,RGN,EGF,LRP2,CDH1
GO: Biological Process	GO:0006721	terpenoid metabolic process				2.52e-05	0.1	0.00223	0.0197	8	125	CYP3A5,ALDH8A1,HMGCS2,APOM,ADH6,GPC5,RBP4,LRP2
GO: Biological Process	GO:0006869	lipid transport				3.05e-05	0.121	0.00264	0.0234	16	512	FABP1,APOM,CLU,NR1H4,SLC27A2,GULP1,RBP4,SLC13A3,REN,SLC3A1,SLC4A1,SLC10A2,EGF,MTTP,GRAMD1C,SERPINA5
GO: Biological Process	GO:0042908	xenobiotic transport				3.6e-05	0.143	0.00305	0.027	5	40	SLC17A3,PDZK1,SLC15A2,SLC22A2,SLC22A5
GO: Biological Process	GO:0046903	secretion				4.02e-05	0.16	0.00333	0.0295	33	1672	PCP4,GAD1,ERBB3,ERBB4,AOC1,MAOB,EXPH5,ACP3,CLU,FGB,UMOD,NR3C2,MME,PLG,KNG1,NR1H4,SLC27A2,NPHS1,MGAM,DSC1,ANXA3,RBP4,REN,NLGN1,SLC44A4,TFAP2B,SLC2A2,FRK,EGF,SLCO4C1,SLC22A2,MTTP,LRP2
GO: Biological Process	GO:0006631	fatty acid metabolic process				4.74e-05	0.189	0.00385	0.0341	14	419	EPHX2,ACADL,CYP24A1,FABP1,TYRP1,PPARGC1A,ACSM3,ANGPTL3,SLC27A2,RGN,EHHADH,CYP4F3,HAO2,PCK1
GO: Biological Process	GO:0006575	cellular modified amino acid metabolic process				4.99e-05	0.199	0.00398	0.0353	10	221	ACADL,PIPOX,BHMT,CLIC5,BHMT2,DIO1,BBOX1,GPX3,SLC22A5,ASS1
GO: Biological Process	GO:0051180	vitamin transport				5.14e-05	0.205	0.00401	0.0356	5	43	AFM,RBP4,CUBN,SLC2A2,LRP2
GO: Biological Process	GO:0015698	inorganic anion transport				5.54e-05	0.221	0.00424	0.0376	9	180	SLC17A3,SLC26A4,CLIC5,SLC4A1,SLC12A1,SLC13A1,SLC17A1,SLC4A4,GABRA2
GO: Biological Process	GO:0048839	inner ear development				6.49e-05	0.258	0.00487	0.0432	10	228	CLIC5,PVALB,FGF9,FGFR3,PLS1,CALB1,CXCL14,SLC44A4,TFAP2A,CDH1
GO: Biological Process	GO:1901700	response to oxygen-containing compound				7.08e-05	0.282	0.00522	0.0463	35	1875	AOC1,MAOB,CYP24A1,FABP1,APOM,ADH6,PPARGC1A,KL,CLU,GLDC,KCNJ16,UMOD,HSD11B2,HSD17B2,ALDOB,NR1H4,COL4A3,FMO1,HYAL1,GPX3,RBP4,GRB14,NOX4,REN,MAP7,TFAP2A,SLC2A2,SLC4A1,CRYAB,ATP6V0A4,ASS1,CDH1,G6PC1,GRAMD1C,PCK1
GO: Biological Process	GO:0055067	monovalent inorganic cation homeostasis				7.44e-05	0.296	0.00538	0.0477	9	187	SLC26A4,KCNJ16,UMOD,NR3C2,TFAP2B,SLC4A1,SLC12A1,ATP6V0A4,SLC4A4
GO: Biological Process	GO:0006720	isoprenoid metabolic process				7.61e-05	0.303	0.00541	0.048	8	146	CYP3A5,ALDH8A1,HMGCS2,APOM,ADH6,GPC5,RBP4,LRP2
GO: Biological Process	GO:0001523	retinoid metabolic process				7.97e-05	0.317	0.00549	0.0487	7	109	CYP3A5,ALDH8A1,APOM,ADH6,GPC5,RBP4,LRP2
GO: Biological Process	GO:0030258	lipid modification				8.06e-05	0.321	0.00549	0.0487	11	282	EPHX2,ACADL,CYP3A5,CYP24A1,PLPPR1,FABP1,PPARGC1A,PIP5K1B,SLC27A2,EHHADH,HAO2
GO: Biological Process	GO:0044283	small molecule biosynthetic process				8.36e-05	0.333	0.00549	0.0487	19	743	EPHX2,GAD1,UPB1,ACADL,ALDH8A1,HMGCS2,BHMT,PPARGC1A,ACSM3,BHMT2,ALDOB,NR1H4,SLC27A2,DPYS,RBP4,RGN,ASS1,G6PC1,PCK1
GO: Biological Process	GO:0042632	cholesterol homeostasis				8.44e-05	0.336	0.00549	0.0487	7	110	EPHX2,APOM,ACSM3,ANGPTL3,NR1H4,MTTP,G6PC1
GO: Biological Process	GO:0055092	sterol homeostasis				8.94e-05	0.356	0.00549	0.0487	7	111	EPHX2,APOM,ACSM3,ANGPTL3,NR1H4,MTTP,G6PC1
GO: Biological Process	GO:0020028	endocytic hemoglobin import into cell				8.97e-05	0.357	0.00549	0.0487	2	2	CUBN,LRP2
GO: Biological Process	GO:0035847	uterine epithelium development				8.97e-05	0.357	0.00549	0.0487	2	2	LHX1,CDH1
GO: Biological Process	GO:0140421	endocytic heme import into cell				8.97e-05	0.357	0.00549	0.0487	2	2	CUBN,LRP2
GO: Biological Process	GO:0140420	heme import into cell				8.97e-05	0.357	0.00549	0.0487	2	2	CUBN,LRP2
GO: Biological Process	GO:0048878	chemical homeostasis				9.13e-05	0.363	0.00551	0.0488	28	1369	EPHX2,ERBB4,SLC26A4,APOM,PPARGC1A,KL,ACSM3,KCNJ16,ANGPTL3,UMOD,NR3C2,KNG1,NR1H4,CALB1,RBP4,NOX4,CUBN,TFAP2B,SLC4A1,RGN,SLC12A1,ATP6V0A4,MTTP,LRP2,SLC4A4,CDH1,G6PC1,PCK1
GO: Biological Process	GO:0009064	glutamine family amino acid metabolic process				9.61e-05	0.383	0.00571	0.0506	6	78	GAD1,PRODH2,NR1H4,ARG2,ASS1,AGMAT
GO: Biological Process	GO:0051094	positive regulation of developmental process				0.0001	0.4	0.00588	0.0521	30	1525	PCP4,CDS1,ERBB3,ERBB4,NAP1L2,NELL1,PPARGC1A,KL,CLU,ANGPTL3,FGB,COBL,FGF9,FGFR3,FLRT3,MME,PLS1,NR1H4,HYAL1,ANXA3,NLGN1,TFAP2A,ARG2,LHX1,SHANK2,EGF,LRP2,MST1L,TACSTD2,PCK1
GO: Biological Process	GO:0060042	retina morphogenesis in camera-type eye				0.000103	0.411	0.00595	0.0528	6	79	TSPAN12,CALB1,RBP4,TFAP2A,TFAP2B,LHX1
GO: Biological Process	GO:0008285	negative regulation of cell population proliferation				0.000108	0.428	0.00609	0.054	21	889	ERBB4,AZGP1,ADGRG1,PBLD,CCN6,NELL1,PPARGC1A,UMOD,FGFR3,PLG,COL4A3,RAP1GAP,RBP4,NOX4,TFAP2A,TFAP2B,ARG2,ACE2,FRK,RGN,CDH1
GO: Biological Process	GO:0035295	tube development				0.000109	0.433	0.00609	0.054	27	1310	TSPAN12,ADGRG1,CCN6,ANGPTL3,UMOD,COBL,FGF9,FGFR3,MME,PLG,COL4A3,CALB1,HYAL1,ANXA3,RBP4,SOSTDC1,SIM1,TFAP2A,TFAP2B,ARG2,LHX1,EGF,ASS1,LRP2,EMX2,TACSTD2,CDH1
GO: Biological Process	GO:0016101	diterpenoid metabolic process				0.000112	0.445	0.00609	0.054	7	115	CYP3A5,ALDH8A1,APOM,ADH6,GPC5,RBP4,LRP2
GO: Biological Process	GO:0019395	fatty acid oxidation				0.000112	0.445	0.00609	0.054	7	115	ACADL,CYP24A1,FABP1,PPARGC1A,SLC27A2,EHHADH,HAO2
GO: Biological Process	GO:0046394	carboxylic acid biosynthetic process				0.000114	0.454	0.00613	0.0544	12	345	EPHX2,GAD1,UPB1,ACADL,ALDH8A1,BHMT,ACSM3,BHMT2,NR1H4,SLC27A2,RGN,ASS1
GO: Biological Process	GO:0032836	glomerular basement membrane development				0.00013	0.516	0.00688	0.061	3	11	NPHS1,COL4A3,COL4A4
GO: Biological Process	GO:0009719	response to endogenous stimulus				0.000134	0.534	0.00703	0.0623	33	1780	ERBB4,AOC1,MAOB,ESRRG,PBLD,PPARGC1A,KL,ANGPTL3,FGB,FGF9,NR3C2,FGFR3,FLRT3,HSD11B2,ALDOB,NR1H4,RAP1GAP,HYAL1,ANXA3,SH3GL2,RBP4,GRB14,SOSTDC1,NOX4,REN,TFAP2B,LHX1,ATP6V0A4,ASS1,LRP2,CDH1,G6PC1,PCK1
GO: Biological Process	GO:0016053	organic acid biosynthetic process				0.000141	0.562	0.00717	0.0636	12	353	EPHX2,GAD1,UPB1,ACADL,ALDH8A1,BHMT,ACSM3,BHMT2,NR1H4,SLC27A2,RGN,ASS1
GO: Biological Process	GO:0006790	sulfur compound metabolic process				0.000142	0.566	0.00717	0.0636	13	408	GLYAT,ACP3,PIPOX,HMGCS2,BHMT,ACSM3,CLIC5,SULT1C2,BHMT2,HYAL1,GPX3,NOX4,EHHADH
GO: Biological Process	GO:0042445	hormone metabolic process				0.000143	0.571	0.00717	0.0636	10	251	CYP3A5,ALDH8A1,ADH6,PPARGC1A,DIO1,MME,HSD17B2,RBP4,REN,ACE2
GO: Biological Process	GO:0033993	response to lipid				0.000145	0.579	0.00717	0.0636	22	977	MAOB,CYP24A1,ESRRG,PPARGC1A,CLU,GLDC,UMOD,NR3C2,HSD11B2,HSD17B2,NR1H4,FMO1,ANXA3,GPX3,RBP4,REN,MAP7,TFAP2A,CRYAB,ASS1,GRAMD1C,PCK1
GO: Biological Process	GO:0034440	lipid oxidation				0.000146	0.581	0.00717	0.0636	7	120	ACADL,CYP24A1,FABP1,PPARGC1A,SLC27A2,EHHADH,HAO2
GO: Biological Process	GO:0007586	digestion				0.00015	0.599	0.0073	0.0647	8	161	PBLD,FABP1,PPARGC1A,PLS1,MGAM,RBP4,SLC2A2,SLC22A5
GO: Biological Process	GO:1905039	carboxylic acid transmembrane transport				0.000164	0.652	0.00768	0.0681	8	163	SLC5A12,RBP4,SLC13A3,SLC3A1,SLC7A9,ACE2,SLC22A2,LRP2
GO: Biological Process	GO:0072009	nephron epithelium development				0.00017	0.677	0.00768	0.0681	7	123	NPHS2,UMOD,NPHS1,CALB1,TFAP2B,LHX1,TACSTD2
GO: Biological Process	GO:0098661	inorganic anion transmembrane transport				0.00017	0.677	0.00768	0.0681	7	123	SLC26A4,CLIC5,SLC4A1,SLC12A1,SLC13A1,SLC17A1,GABRA2
GO: Biological Process	GO:1903825	organic acid transmembrane transport				0.000171	0.68	0.00768	0.0681	8	164	SLC5A12,RBP4,SLC13A3,SLC3A1,SLC7A9,ACE2,SLC22A2,LRP2
GO: Biological Process	GO:0002003	angiotensin maturation				0.000172	0.683	0.00768	0.0681	3	12	MME,REN,ACE2
GO: Biological Process	GO:0072017	distal tubule development				0.000172	0.683	0.00768	0.0681	3	12	UMOD,CALB1,TFAP2B
GO: Biological Process	GO:0060068	vagina development				0.000172	0.683	0.00768	0.0681	3	12	RBP4,LHX1,LRP2
GO: Biological Process	GO:0043583	ear development				0.000174	0.691	0.00768	0.0681	10	257	CLIC5,PVALB,FGF9,FGFR3,PLS1,CALB1,CXCL14,SLC44A4,TFAP2A,CDH1
GO: Biological Process	GO:0150104	transport across blood-brain barrier				0.000176	0.701	0.00771	0.0683	6	87	SLC13A3,SLC15A2,SLC22A2,SLC22A5,LRP2,SLC4A4
GO: Biological Process	GO:0010232	vascular transport				0.000188	0.747	0.00812	0.072	6	88	SLC13A3,SLC15A2,SLC22A2,SLC22A5,LRP2,SLC4A4
GO: Biological Process	GO:0003407	neural retina development				0.0002	0.795	0.00853	0.0756	6	89	TSPAN12,GPM6A,CALB1,TFAP2A,TFAP2B,LHX1
GO: Biological Process	GO:0008203	cholesterol metabolic process				0.000201	0.802	0.00853	0.0756	8	168	EPHX2,ACADL,HMGCS2,ANGPTL3,NR1H4,FMO5,CUBN,MTTP
GO: Biological Process	GO:0032940	secretion by cell				0.000217	0.862	0.00902	0.08	29	1517	PCP4,GAD1,AOC1,MAOB,EXPH5,ACP3,CLU,FGB,NR3C2,MME,PLG,KNG1,NR1H4,SLC27A2,MGAM,DSC1,ANXA3,RBP4,REN,NLGN1,SLC44A4,TFAP2B,SLC2A2,FRK,EGF,SLCO4C1,SLC22A2,MTTP,LRP2
GO: Biological Process	GO:0006641	triglyceride metabolic process				0.000218	0.866	0.00902	0.08	7	128	FABP1,ANGPTL3,NR1H4,RGN,MTTP,G6PC1,PCK1
GO: Biological Process	GO:0002002	regulation of angiotensin levels in blood				0.000222	0.882	0.00909	0.0806	3	13	MME,REN,ACE2
GO: Biological Process	GO:0090596	sensory organ morphogenesis				0.000264	1	0.0104	0.092	11	323	TSPAN12,CLIC5,FGF9,FGFR3,PLS1,CALB1,RBP4,SLC44A4,TFAP2A,TFAP2B,LHX1
GO: Biological Process	GO:0006579	amino-acid betaine catabolic process				0.000265	1	0.0104	0.092	2	3	ACADL,BHMT
GO: Biological Process	GO:1904640	response to methionine				0.000265	1	0.0104	0.092	2	3	PPARGC1A,PCK1
GO: Biological Process	GO:1904638	response to resveratrol				0.000265	1	0.0104	0.092	2	3	PPARGC1A,G6PC1
GO: Biological Process	GO:0098657	import into cell				0.000266	1	0.0104	0.092	10	271	KCNJ1,KCNJ16,SLC27A2,CUBN,ACE2,SLC12A1,SLC15A2,SLC22A2,LRP2,FXYD2
GO: Biological Process	GO:0009437	carnitine metabolic process				0.00028	1	0.0107	0.095	3	14	ACADL,BBOX1,SLC22A5
GO: Biological Process	GO:0006570	tyrosine metabolic process				0.00028	1	0.0107	0.095	3	14	HGD,TYRP1,HPD
GO: Biological Process	GO:0002064	epithelial cell development				0.00029	1	0.011	0.0976	10	274	EXPH5,NPHS2,CLIC5,FGFR3,PLS1,NPHS1,REN,MAP7,TFAP2A,CDH1
GO: Biological Process	GO:0072593	reactive oxygen species metabolic process				0.000308	1	0.0115	0.102	11	329	MAOB,CCN6,CLU,GPX3,NOX4,TFAP2A,ARG2,CRYAB,ACE2,RGN,ASS1
GO: Biological Process	GO:0009308	amine metabolic process				0.00031	1	0.0115	0.102	8	179	AOC1,MAOA,MAOB,BHMT,KL,SULT1C2,NR1H4,AGMAT
GO: Biological Process	GO:1902652	secondary alcohol metabolic process				0.000334	1	0.0123	0.109	8	181	EPHX2,ACADL,HMGCS2,ANGPTL3,NR1H4,FMO5,CUBN,MTTP
GO: Biological Process	GO:0072329	monocarboxylic acid catabolic process				0.000345	1	0.0124	0.11	7	138	ACADL,FABP1,SLC27A2,EHHADH,CYP4F3,HAO2,PCK1
GO: Biological Process	GO:0098739	import across plasma membrane				0.000346	1	0.0124	0.11	8	182	KCNJ1,KCNJ16,ACE2,SLC12A1,SLC15A2,SLC22A2,LRP2,FXYD2
GO: Biological Process	GO:0015697	quaternary ammonium group transport				0.000348	1	0.0124	0.11	3	15	PDZK1,SLC22A2,SLC22A5
GO: Biological Process	GO:0019627	urea metabolic process				0.000348	1	0.0124	0.11	3	15	NR1H4,ARG2,ASS1
GO: Biological Process	GO:0016125	sterol metabolic process				0.000372	1	0.0131	0.116	8	184	EPHX2,ACADL,HMGCS2,ANGPTL3,NR1H4,FMO5,CUBN,MTTP
GO: Biological Process	GO:0098754	detoxification				0.000392	1	0.0137	0.121	7	141	SLC17A3,PDZK1,FABP1,APOM,GPX3,SLC15A2,SLC22A5
GO: Biological Process	GO:0001656	metanephros development				0.000396	1	0.0137	0.121	6	101	NPHS2,UMOD,CALB1,TFAP2A,TFAP2B,LHX1
GO: Biological Process	GO:2000377	regulation of reactive oxygen species metabolic process				0.000399	1	0.0137	0.121	9	234	CCN6,CLU,NOX4,TFAP2A,ARG2,CRYAB,ACE2,RGN,ASS1
GO: Biological Process	GO:0022610	biological adhesion				0.000416	1	0.0142	0.126	29	1578	CHL1,ERBB3,AZGP1,ADGRG1,CLEC4M,CCN6,ANGPTL3,FGB,UMOD,FLRT3,PLG,KNG1,NPHS1,COL4A3,RAP1GAP,DSC1,HYAL1,NLGN1,CLDN10,CLDN8,SLC4A1,ARG2,ACE2,ASS1,TACSTD2,CDH1,CDH6,PCK1,CDH16
GO: Biological Process	GO:0071941	nitrogen cycle metabolic process				0.000425	1	0.0142	0.126	3	16	NR1H4,ARG2,ASS1
GO: Biological Process	GO:0009111	vitamin catabolic process				0.000425	1	0.0142	0.126	3	16	CYP24A1,CUBN,CYP4F3
GO: Biological Process	GO:0043524	negative regulation of neuron apoptotic process				0.00043	1	0.0143	0.127	8	188	CHL1,PCP4,ERBB3,PPARGC1A,TOX3,RETREG1,TFAP2A,TFAP2B
GO: Biological Process	GO:0006625	protein targeting to peroxisome				0.00046	1	0.0149	0.132	5	68	EPHX2,PIPOX,SLC27A2,EHHADH,HAO2
GO: Biological Process	GO:0072663	establishment of protein localization to peroxisome				0.00046	1	0.0149	0.132	5	68	EPHX2,PIPOX,SLC27A2,EHHADH,HAO2
GO: Biological Process	GO:0072662	protein localization to peroxisome				0.00046	1	0.0149	0.132	5	68	EPHX2,PIPOX,SLC27A2,EHHADH,HAO2
GO: Biological Process	GO:0003014	renal system process				0.000484	1	0.0155	0.138	7	146	KCNJ1,UMOD,HSD11B2,REN,TFAP2B,SLC4A1,SLC15A2
GO: Biological Process	GO:0015695	organic cation transport				0.000491	1	0.0156	0.139	4	39	PDZK1,SLC44A4,SLC22A2,SLC22A5
GO: Biological Process	GO:0048871	multicellular organismal homeostasis				0.000497	1	0.0156	0.139	15	589	ERBB4,ACADL,AZGP1,ESRRG,PBLD,PPARGC1A,KCNJ1,UMOD,SH3GL2,RBP4,NOX4,CUBN,TFAP2B,SLC22A5,CDH1
GO: Biological Process	GO:0003018	vascular process in circulatory system				0.000505	1	0.0156	0.139	10	294	FGB,KNG1,SH3GL2,SLC13A3,ACE2,SLC15A2,SLC22A2,SLC22A5,LRP2,SLC4A4
GO: Biological Process	GO:0051897	positive regulation of protein kinase B signaling				0.000512	1	0.0156	0.139	8	193	ERBB3,ERBB4,KL,FGF9,FGFR3,NOX4,EGF,LRP2
GO: Biological Process	GO:0072044	collecting duct development				0.000512	1	0.0156	0.139	3	17	UMOD,CALB1,TFAP2B
GO: Biological Process	GO:0006066	alcohol metabolic process				0.000526	1	0.0156	0.139	12	408	EPHX2,ACADL,CYP3A5,HMGCS2,ADH6,ANGPTL3,NR1H4,FMO5,RBP4,CUBN,MTTP,PCK1
GO: Biological Process	GO:0035846	oviduct epithelium development				0.000526	1	0.0156	0.139	2	4	LHX1,CDH1
GO: Biological Process	GO:0097273	creatinine homeostasis				0.000526	1	0.0156	0.139	2	4	UMOD,TFAP2B
GO: Biological Process	GO:0071873	response to norepinephrine				0.000526	1	0.0156	0.139	2	4	PPARGC1A,NR1H4
GO: Biological Process	GO:0010037	response to carbon dioxide				0.000526	1	0.0156	0.139	2	4	KCNJ16,SLC4A1
GO: Biological Process	GO:0098742	cell-cell adhesion via plasma-membrane adhesion molecules				0.000533	1	0.0157	0.139	10	296	CHL1,UMOD,FLRT3,DSC1,NLGN1,CLDN10,CLDN8,CDH1,CDH6,CDH16
GO: Biological Process	GO:0015807	L-amino acid transport				0.000562	1	0.0164	0.146	5	71	SLC3A1,ARG2,SLC7A9,ACE2,SLC22A2
GO: Biological Process	GO:0060429	epithelium development				0.000576	1	0.0167	0.148	28	1532	ERBB4,EXPH5,NPHS2,CLIC5,UMOD,COBL,FGFR3,FLRT3,PLS1,NPHS1,KRT7,CALB1,DSC1,SOSTDC1,REN,SIM1,MAP7,SLC44A4,TFAP2A,TFAP2B,ARG2,LHX1,EGF,LRP2,MST1L,TACSTD2,CDH1,PCK1
GO: Biological Process	GO:0043574	peroxisomal transport				0.000599	1	0.0173	0.153	5	72	EPHX2,PIPOX,SLC27A2,EHHADH,HAO2
GO: Biological Process	GO:0007423	sensory organ development				0.000639	1	0.0183	0.162	16	669	TSPAN12,CLIC5,PVALB,FGF9,FGFR3,PLS1,GPM6A,CALB1,RBP4,CXCL14,SLC44A4,TFAP2A,TFAP2B,CRYAB,LHX1,CDH1
GO: Biological Process	GO:0042493	response to drug				0.000664	1	0.0188	0.167	12	419	GAD1,MAOB,PPARGC1A,UMOD,HSD11B2,NR1H4,REN,TFAP2B,SLC22A2,ASS1,EMX2,CDH1
GO: Biological Process	GO:0048593	camera-type eye morphogenesis				0.000665	1	0.0188	0.167	7	154	TSPAN12,FGFR3,CALB1,RBP4,TFAP2A,TFAP2B,LHX1
GO: Biological Process	GO:0046364	monosaccharide biosynthetic process				0.000687	1	0.0191	0.169	6	112	PPARGC1A,ALDOB,RBP4,RGN,G6PC1,PCK1
GO: Biological Process	GO:0009062	fatty acid catabolic process				0.000687	1	0.0191	0.169	6	112	ACADL,FABP1,SLC27A2,EHHADH,HAO2,PCK1
GO: Biological Process	GO:0043269	regulation of ion transport				0.000691	1	0.0191	0.169	28	1550	PCP4,ERBB3,ERBB4,MAOB,SPINK1,EXPH5,PDZK1,PPARGC1A,CLIC5,KCNJ1,KCNJ16,FGB,UMOD,NR1H4,RBP4,REN,NLGN1,TFAP2B,CLDN10,SLC2A2,ARG2,ACE2,RGN,SHANK2,EGF,LRP2,FXYD2,CDH1
GO: Biological Process	GO:0072210	metanephric nephron development				0.000715	1	0.0193	0.171	4	43	NPHS2,TFAP2A,TFAP2B,LHX1
GO: Biological Process	GO:1903409	reactive oxygen species biosynthetic process				0.000718	1	0.0193	0.171	7	156	MAOB,CCN6,CLU,NOX4,ARG2,RGN,ASS1
GO: Biological Process	GO:0042136	neurotransmitter biosynthetic process				0.00072	1	0.0193	0.171	3	19	GAD1,SLC44A4,SLC22A2
GO: Biological Process	GO:0030540	female genitalia development				0.00072	1	0.0193	0.171	3	19	RBP4,LHX1,LRP2
GO: Biological Process	GO:0032835	glomerulus development				0.000722	1	0.0193	0.171	5	75	NPHS2,NPHS1,COL4A3,COL4A4,LHX1
GO: Biological Process	GO:0006639	acylglycerol metabolic process				0.000746	1	0.0198	0.175	7	157	FABP1,ANGPTL3,NR1H4,RGN,MTTP,G6PC1,PCK1
GO: Biological Process	GO:0006576	cellular biogenic amine metabolic process				0.000754	1	0.0199	0.176	6	114	AOC1,MAOA,MAOB,BHMT,KL,AGMAT
GO: Biological Process	GO:0006638	neutral lipid metabolic process				0.000774	1	0.0203	0.18	7	158	FABP1,ANGPTL3,NR1H4,RGN,MTTP,G6PC1,PCK1
GO: Biological Process	GO:0001823	mesonephros development				0.000789	1	0.0204	0.181	6	115	CALB1,REN,SIM1,ARG2,LHX1,TACSTD2
GO: Biological Process	GO:0010817	regulation of hormone levels				0.000813	1	0.0204	0.181	15	618	CYP3A5,ALDH8A1,ADH6,PPARGC1A,FGB,DIO1,MME,HSD17B2,NR1H4,RBP4,REN,TFAP2B,SLC2A2,ACE2,LRP2
GO: Biological Process	GO:0007267	cell-cell signaling				0.000838	1	0.0204	0.181	33	1971	PCP4,TSPAN12,GAD1,ERBB4,MAOB,ADGRG1,CCN6,FGB,FGF9,NR3C2,FGFR3,GPC5,MME,PLG,NR1H4,TRHDE,CALB1,RBP4,SOSTDC1,CXCL14,REN,NLGN1,SLC44A4,TFAP2A,TFAP2B,SLC2A2,LHX1,SHANK2,EGF,SLC22A2,LRP2,CDH1,GABRA2
GO: Biological Process	GO:0015802	basic amino acid transport				0.000841	1	0.0204	0.181	3	20	SLC3A1,ARG2,SLC22A2
GO: Biological Process	GO:0030501	positive regulation of bone mineralization				0.00085	1	0.0204	0.181	4	45	NELL1,KL,FGFR3,TFAP2A
GO: Biological Process	GO:0007155	cell adhesion				0.000851	1	0.0204	0.181	28	1571	CHL1,ERBB3,AZGP1,ADGRG1,CLEC4M,CCN6,ANGPTL3,FGB,UMOD,FLRT3,PLG,KNG1,NPHS1,COL4A3,RAP1GAP,DSC1,HYAL1,NLGN1,CLDN10,CLDN8,SLC4A1,ARG2,ASS1,TACSTD2,CDH1,CDH6,PCK1,CDH16
GO: Biological Process	GO:0042127	regulation of cell population proliferation				0.000853	1	0.0204	0.181	33	1973	ERBB3,ERBB4,AZGP1,ADGRG1,PBLD,CCN6,NELL1,PPARGC1A,CLU,UMOD,FGF9,NR3C2,FGFR3,PLG,COL4A3,RAP1GAP,HYAL1,RBP4,NOX4,TFAP2A,TFAP2B,SLC4A1,ARG2,LHX1,ACE2,FRK,RGN,SHANK2,EGF,LRP2,MST1L,TACSTD2,CDH1
GO: Biological Process	GO:0016052	carbohydrate catabolic process				0.000862	1	0.0204	0.181	8	209	PPARGC1A,ALDOB,MGAM,SLC4A1,GBA3,OGDHL,SLC4A4,G6PC1
GO: Biological Process	GO:1904352	positive regulation of protein catabolic process in the vacuole				0.000872	1	0.0204	0.181	2	5	RNF128,LRP2
GO: Biological Process	GO:0072221	metanephric distal convoluted tubule development				0.000872	1	0.0204	0.181	2	5	UMOD,CALB1
GO: Biological Process	GO:0006572	tyrosine catabolic process				0.000872	1	0.0204	0.181	2	5	HGD,HPD
GO: Biological Process	GO:0072025	distal convoluted tubule development				0.000872	1	0.0204	0.181	2	5	UMOD,CALB1
GO: Biological Process	GO:0019482	beta-alanine metabolic process				0.000872	1	0.0204	0.181	2	5	UPB1,DPYS
GO: Biological Process	GO:0071332	cellular response to fructose stimulus				0.000872	1	0.0204	0.181	2	5	PPARGC1A,PCK1
GO: Biological Process	GO:0006842	tricarboxylic acid transport				0.000872	1	0.0204	0.181	2	5	UMOD,SLC13A3
GO: Biological Process	GO:0015746	citrate transport				0.000872	1	0.0204	0.181	2	5	UMOD,SLC13A3
GO: Biological Process	GO:0015739	sialic acid transport				0.000872	1	0.0204	0.181	2	5	SLC17A3,SLC17A1
GO: Biological Process	GO:0015811	L-cystine transport				0.000872	1	0.0204	0.181	2	5	SLC3A1,SLC7A9
GO: Biological Process	GO:0001990	regulation of systemic arterial blood pressure by hormone				0.000925	1	0.0215	0.191	4	46	MME,HSD11B2,REN,ACE2
GO: Biological Process	GO:0042953	lipoprotein transport				0.000974	1	0.0224	0.199	3	21	CUBN,MTTP,LRP2
GO: Biological Process	GO:0006525	arginine metabolic process				0.000974	1	0.0224	0.199	3	21	ARG2,ASS1,AGMAT
GO: Biological Process	GO:0071495	cellular response to endogenous stimulus				0.00101	1	0.0231	0.205	27	1510	ERBB4,AOC1,ESRRG,PBLD,PPARGC1A,KL,FGB,FGF9,NR3C2,FGFR3,FLRT3,NR1H4,RAP1GAP,HYAL1,SH3GL2,GRB14,SOSTDC1,NOX4,REN,TFAP2B,LHX1,ATP6V0A4,ASS1,LRP2,CDH1,G6PC1,PCK1
GO: Biological Process	GO:0008652	cellular amino acid biosynthetic process				0.00103	1	0.0233	0.206	5	81	GAD1,UPB1,BHMT,BHMT2,ASS1
GO: Biological Process	GO:0022600	digestive system process				0.00103	1	0.0233	0.206	6	121	PBLD,FABP1,PLS1,RBP4,SLC2A2,SLC22A5
GO: Biological Process	GO:0016339	calcium-dependent cell-cell adhesion via plasma membrane cell adhesion molecules				0.00109	1	0.0244	0.217	4	48	NLGN1,CDH1,CDH6,CDH16
GO: Biological Process	GO:0006091	generation of precursor metabolites and energy				0.0011	1	0.0245	0.217	14	571	MAOB,HMGCS2,ADH6,TYRP1,PPARGC1A,KL,GLDC,ALDOB,NOX4,SLC4A1,PPP1R1A,OGDHL,SLC4A4,G6PC1
GO: Biological Process	GO:0010035	response to inorganic substance				0.0011	1	0.0245	0.217	15	637	AOC1,MAOB,FABP1,PPARGC1A,KCNJ1,FGB,UMOD,ALDOB,NLGN1,TFAP2A,SLC4A1,CRYAB,ASS1,MTTP,CDH1
GO: Biological Process	GO:0044872	lipoprotein localization				0.00112	1	0.0246	0.219	3	22	CUBN,MTTP,LRP2
GO: Biological Process	GO:0030277	maintenance of gastrointestinal epithelium				0.00112	1	0.0246	0.219	3	22	PBLD,RBP4,SLC22A5
GO: Biological Process	GO:0006775	fat-soluble vitamin metabolic process				0.00117	1	0.0256	0.227	4	49	CYP24A1,CUBN,LRP2,CYP4F3
GO: Biological Process	GO:1990573	potassium ion import across plasma membrane				0.00117	1	0.0256	0.227	4	49	KCNJ1,KCNJ16,SLC12A1,FXYD2
GO: Biological Process	GO:0050678	regulation of epithelial cell proliferation				0.00118	1	0.0256	0.227	12	448	ERBB4,PBLD,FGF9,FGFR3,COL4A3,RAP1GAP,HYAL1,RGN,EGF,MST1L,TACSTD2,CDH1
GO: Biological Process	GO:0008217	regulation of blood pressure				0.0012	1	0.0258	0.229	8	220	EPHX2,KL,ACSM3,MME,HSD11B2,TRHDE,REN,ACE2
GO: Biological Process	GO:0051240	positive regulation of multicellular organismal process				0.00126	1	0.0265	0.235	29	1692	ERBB3,ERBB4,ACADL,ESRRG,NELL1,PPARGC1A,KL,CLU,ANGPTL3,FGB,FGF9,FGFR3,FLRT3,MME,PLG,PLS1,NR1H4,IL17RB,HYAL1,ANXA3,NLGN1,TFAP2A,LHX1,ACE2,EGF,SLC22A5,LRP2,MST1L,PCK1
GO: Biological Process	GO:0070293	renal absorption				0.00128	1	0.0265	0.235	3	23	KCNJ1,UMOD,SLC15A2
GO: Biological Process	GO:0106001	intestinal hexose absorption				0.0013	1	0.0265	0.235	2	6	PLS1,SLC2A2
GO: Biological Process	GO:0090080	positive regulation of MAPKKK cascade by fibroblast growth factor receptor signaling pathway				0.0013	1	0.0265	0.235	2	6	KL,FGFR3
GO: Biological Process	GO:0070294	renal sodium ion absorption				0.0013	1	0.0265	0.235	2	6	KCNJ1,UMOD
GO: Biological Process	GO:0060066	oviduct development				0.0013	1	0.0265	0.235	2	6	LHX1,CDH1
GO: Biological Process	GO:0035502	metanephric part of ureteric bud development				0.0013	1	0.0265	0.235	2	6	CALB1,LHX1
GO: Biological Process	GO:0016191	synaptic vesicle uncoating				0.0013	1	0.0265	0.235	2	6	DNAJC6,SH3GL2
GO: Biological Process	GO:0015747	urate transport				0.0013	1	0.0265	0.235	2	6	SLC17A3,SLC17A1
GO: Biological Process	GO:0015879	carnitine transport				0.0013	1	0.0265	0.235	2	6	PDZK1,SLC22A5
GO: Biological Process	GO:0044106	cellular amine metabolic process				0.00136	1	0.0276	0.245	7	174	AOC1,MAOA,MAOB,BHMT,KL,NR1H4,AGMAT
GO: Biological Process	GO:0030004	cellular monovalent inorganic cation homeostasis				0.00138	1	0.0278	0.247	6	128	UMOD,NR3C2,TFAP2B,SLC4A1,ATP6V0A4,SLC4A4
GO: Biological Process	GO:0072243	metanephric nephron epithelium development				0.00145	1	0.0289	0.256	3	24	NPHS2,UMOD,CALB1
GO: Biological Process	GO:0042359	vitamin D metabolic process				0.00145	1	0.0289	0.256	3	24	CYP24A1,CUBN,LRP2
GO: Biological Process	GO:0001991	regulation of systemic arterial blood pressure by circulatory renin-angiotensin				0.00145	1	0.0289	0.256	3	24	MME,REN,ACE2
GO: Biological Process	GO:0043523	regulation of neuron apoptotic process				0.00146	1	0.0289	0.256	9	281	CHL1,PCP4,ERBB3,PPARGC1A,TOX3,RETREG1,FGFR3,TFAP2A,TFAP2B
GO: Biological Process	GO:0009066	aspartate family amino acid metabolic process				0.00147	1	0.0289	0.257	4	52	PIPOX,BHMT,BHMT2,ASS1
GO: Biological Process	GO:0007031	peroxisome organization				0.00164	1	0.032	0.284	5	90	EPHX2,PIPOX,SLC27A2,EHHADH,HAO2
GO: Biological Process	GO:0048608	reproductive structure development				0.00164	1	0.032	0.284	13	530	ADGRG1,FGF9,MME,PLG,HSD17B2,RBP4,REN,MAP7,LHX1,SLC22A5,LRP2,CDH1,SERPINA5
GO: Biological Process	GO:0007605	sensory perception of sound				0.00165	1	0.032	0.284	7	180	SLC26A4,CLIC5,COL4A3,TFAP2A,ATP6V0A4,LRP2,CDH1
GO: Biological Process	GO:0070169	positive regulation of biomineral tissue development				0.00169	1	0.0323	0.286	4	54	NELL1,KL,FGFR3,TFAP2A
GO: Biological Process	GO:0030195	negative regulation of blood coagulation				0.00169	1	0.0323	0.286	4	54	FGB,PLG,KNG1,TSPAN8
GO: Biological Process	GO:0070848	response to growth factor				0.00169	1	0.0323	0.286	17	805	TSPAN12,ERBB4,PBLD,PPARGC1A,KL,FGF9,FGFR3,FLRT3,RAP1GAP,HYAL1,ANXA3,SH3GL2,SOSTDC1,NOX4,TFAP2B,LHX1,LRP2
GO: Biological Process	GO:0061458	reproductive system development				0.00178	1	0.0323	0.286	13	535	ADGRG1,FGF9,MME,PLG,HSD17B2,RBP4,REN,MAP7,LHX1,SLC22A5,LRP2,CDH1,SERPINA5
GO: Biological Process	GO:0072235	metanephric distal tubule development				0.00181	1	0.0323	0.286	2	7	UMOD,CALB1
GO: Biological Process	GO:0023041	neuronal signal transduction				0.00181	1	0.0323	0.286	2	7	CLU,NLGN1
GO: Biological Process	GO:0060059	embryonic retina morphogenesis in camera-type eye				0.00181	1	0.0323	0.286	2	7	RBP4,LHX1
GO: Biological Process	GO:0071267	L-methionine salvage				0.00181	1	0.0323	0.286	2	7	BHMT,BHMT2
GO: Biological Process	GO:0071265	L-methionine biosynthetic process				0.00181	1	0.0323	0.286	2	7	BHMT,BHMT2
GO: Biological Process	GO:0043102	amino acid salvage				0.00181	1	0.0323	0.286	2	7	BHMT,BHMT2
GO: Biological Process	GO:0046074	dTMP catabolic process				0.00181	1	0.0323	0.286	2	7	UPB1,DPYS
GO: Biological Process	GO:0046079	dUMP catabolic process				0.00181	1	0.0323	0.286	2	7	UPB1,DPYS
GO: Biological Process	GO:0046050	UMP catabolic process				0.00181	1	0.0323	0.286	2	7	UPB1,DPYS
GO: Biological Process	GO:0072318	clathrin coat disassembly				0.00181	1	0.0323	0.286	2	7	DNAJC6,SH3GL2
GO: Biological Process	GO:0015712	hexose phosphate transport				0.00181	1	0.0323	0.286	2	7	SLC17A3,G6PC1
GO: Biological Process	GO:0015760	glucose-6-phosphate transport				0.00181	1	0.0323	0.286	2	7	SLC17A3,G6PC1
GO: Biological Process	GO:0110151	positive regulation of biomineralization				0.00181	1	0.0323	0.286	4	55	NELL1,KL,FGFR3,TFAP2A
GO: Biological Process	GO:1900047	negative regulation of hemostasis				0.00181	1	0.0323	0.286	4	55	FGB,PLG,KNG1,TSPAN8
GO: Biological Process	GO:0010038	response to metal ion				0.00182	1	0.0324	0.288	11	409	AOC1,MAOB,PPARGC1A,KCNJ1,FGB,ALDOB,NLGN1,TFAP2A,ASS1,MTTP,CDH1
GO: Biological Process	GO:0060065	uterus development				0.00184	1	0.0326	0.289	3	26	RBP4,LHX1,CDH1
GO: Biological Process	GO:0055088	lipid homeostasis				0.00187	1	0.0329	0.291	7	184	EPHX2,APOM,ACSM3,ANGPTL3,NR1H4,MTTP,G6PC1
GO: Biological Process	GO:0006766	vitamin metabolic process				0.00187	1	0.0329	0.291	6	136	ACP3,CYP24A1,CUBN,RGN,LRP2,CYP4F3
GO: Biological Process	GO:0003044	regulation of systemic arterial blood pressure mediated by a chemical signal				0.00193	1	0.0338	0.299	4	56	MME,HSD11B2,REN,ACE2
GO: Biological Process	GO:0098609	cell-cell adhesion				0.00194	1	0.0338	0.3	19	961	CHL1,CLEC4M,FGB,UMOD,FLRT3,PLG,NPHS1,RAP1GAP,DSC1,NLGN1,CLDN10,CLDN8,SLC4A1,ARG2,ASS1,CDH1,CDH6,PCK1,CDH16
GO: Biological Process	GO:0060041	retina development in camera-type eye				0.00199	1	0.0344	0.305	7	186	TSPAN12,GPM6A,CALB1,RBP4,TFAP2A,TFAP2B,LHX1
GO: Biological Process	GO:0021871	forebrain regionalization				0.00206	1	0.0353	0.313	3	27	ADGRG1,LHX1,EMX2
GO: Biological Process	GO:0009065	glutamine family amino acid catabolic process				0.00206	1	0.0353	0.313	3	27	GAD1,PRODH2,ARG2
GO: Biological Process	GO:0050819	negative regulation of coagulation				0.00207	1	0.0353	0.313	4	57	FGB,PLG,KNG1,TSPAN8
GO: Biological Process	GO:0016042	lipid catabolic process				0.00209	1	0.0356	0.315	10	355	ACADL,CYP24A1,FABP1,ANGPTL3,SLC27A2,GBA3,EHHADH,CYP4F3,HAO2,PCK1
GO: Biological Process	GO:0034329	cell junction assembly				0.00218	1	0.0368	0.326	12	482	ERBB4,FLRT3,NR1H4,GPM6A,NLGN1,CLDN10,CLDN8,ACE2,SHANK2,CDH1,CDH6,GABRA2
GO: Biological Process	GO:0009725	response to hormone				0.00218	1	0.0368	0.326	19	971	MAOB,ESRRG,PPARGC1A,KL,ANGPTL3,FGB,NR3C2,HSD11B2,ALDOB,NR1H4,ANXA3,RBP4,GRB14,REN,ATP6V0A4,ASS1,LRP2,G6PC1,PCK1
GO: Biological Process	GO:0090102	cochlea development				0.0022	1	0.037	0.328	4	58	PVALB,FGFR3,CALB1,CDH1
GO: Biological Process	GO:0098655	cation transmembrane transport				0.00231	1	0.0385	0.341	20	1051	SLC17A3,PDZK1,PPARGC1A,TRPM3,KCNJ1,KCNJ16,GPM6A,NLGN1,SLC44A4,ACE2,RGN,SHANK2,SLC12A1,SLC15A2,SLC17A1,SLC22A2,SLC22A5,ATP6V0A4,SLC4A4,FXYD2
GO: Biological Process	GO:0009617	response to bacterium				0.00236	1	0.0385	0.341	17	831	MAOB,DEFB1,PPARGC1A,FGB,UMOD,NR1H4,GPM6A,FMO1,ANXA3,REN,CUBN,TFAP2A,ARG2,SLC10A2,SLC22A5,ASS1,PCK1
GO: Biological Process	GO:0019637	organophosphate metabolic process				0.00237	1	0.0385	0.341	22	1206	GLYAT,CDS1,UPB1,ACP3,PIPOX,HMGCS2,PLPPR1,PPARGC1A,ACSM3,SULT1C2,ANGPTL3,PIP5K1B,ALDOB,NR1H4,DPYS,CWH43,SLC44A4,SLC4A1,EHHADH,OGDHL,SLC4A4,G6PC1
GO: Biological Process	GO:1902476	chloride transmembrane transport				0.00239	1	0.0385	0.341	5	98	SLC26A4,CLIC5,SLC4A1,SLC12A1,GABRA2
GO: Biological Process	GO:0071493	cellular response to UV-B				0.0024	1	0.0385	0.341	2	8	MME,HYAL1
GO: Biological Process	GO:0009445	putrescine metabolic process				0.0024	1	0.0385	0.341	2	8	AOC1,AGMAT
GO: Biological Process	GO:0000101	sulfur amino acid transport				0.0024	1	0.0385	0.341	2	8	SLC3A1,SLC7A9
GO: Biological Process	GO:0072319	vesicle uncoating				0.0024	1	0.0385	0.341	2	8	DNAJC6,SH3GL2
GO: Biological Process	GO:0003096	renal sodium ion transport				0.0024	1	0.0385	0.341	2	8	KCNJ1,UMOD
GO: Biological Process	GO:0015838	amino-acid betaine transport				0.0024	1	0.0385	0.341	2	8	PDZK1,SLC22A5
GO: Biological Process	GO:0015871	choline transport				0.0024	1	0.0385	0.341	2	8	SLC44A4,SLC22A2
GO: Biological Process	GO:0044242	cellular lipid catabolic process				0.00241	1	0.0386	0.342	8	246	ACADL,FABP1,ANGPTL3,SLC27A2,GBA3,EHHADH,HAO2,PCK1
GO: Biological Process	GO:0048592	eye morphogenesis				0.00245	1	0.0389	0.345	7	193	TSPAN12,FGFR3,CALB1,RBP4,TFAP2A,TFAP2B,LHX1
GO: Biological Process	GO:0034754	cellular hormone metabolic process				0.0025	1	0.0396	0.351	6	144	CYP3A5,ALDH8A1,ADH6,PPARGC1A,HSD17B2,RBP4
GO: Biological Process	GO:0008610	lipid biosynthetic process				0.00264	1	0.0417	0.37	16	768	EPHX2,CDS1,ACADL,ALDH8A1,HMGCS2,PPARGC1A,ACSM3,PIP5K1B,HSD11B2,HSD17B2,NR1H4,SLC27A2,CWH43,SLC44A4,RGN,PCK1
GO: Biological Process	GO:0023061	signal release				0.00269	1	0.0423	0.376	14	629	PCP4,GAD1,MAOB,FGB,NR3C2,NR1H4,RBP4,REN,NLGN1,SLC44A4,TFAP2B,SLC2A2,SLC22A2,LRP2
GO: Biological Process	GO:0006094	gluconeogenesis				0.00272	1	0.0427	0.378	5	101	PPARGC1A,ALDOB,RBP4,G6PC1,PCK1
GO: Biological Process	GO:0035239	tube morphogenesis				0.00278	1	0.0431	0.382	20	1068	TSPAN12,ADGRG1,CCN6,ANGPTL3,COBL,FGF9,FGFR3,PLG,COL4A3,HYAL1,ANXA3,SOSTDC1,TFAP2A,TFAP2B,LHX1,EGF,LRP2,EMX2,TACSTD2,CDH1
GO: Biological Process	GO:0010669	epithelial structure maintenance				0.0028	1	0.0431	0.382	3	30	PBLD,RBP4,SLC22A5
GO: Biological Process	GO:0072207	metanephric epithelium development				0.0028	1	0.0431	0.382	3	30	NPHS2,UMOD,CALB1
GO: Biological Process	GO:0035809	regulation of urine volume				0.0028	1	0.0431	0.382	3	30	UMOD,TFAP2B,SLC4A1
GO: Biological Process	GO:0045778	positive regulation of ossification				0.00281	1	0.0432	0.383	4	62	NELL1,KL,FGFR3,TFAP2A
GO: Biological Process	GO:0071363	cellular response to growth factor stimulus				0.00289	1	0.0442	0.392	16	775	TSPAN12,ERBB4,PBLD,PPARGC1A,KL,FGF9,FGFR3,FLRT3,RAP1GAP,HYAL1,SH3GL2,SOSTDC1,NOX4,TFAP2B,LHX1,LRP2
GO: Biological Process	GO:0003333	amino acid transmembrane transport				0.00296	1	0.0446	0.396	5	103	SLC13A3,SLC3A1,SLC7A9,ACE2,SLC22A2
GO: Biological Process	GO:0072080	nephron tubule development				0.00296	1	0.0446	0.396	5	103	UMOD,CALB1,TFAP2B,LHX1,TACSTD2
GO: Biological Process	GO:0001894	tissue homeostasis				0.00302	1	0.0446	0.396	9	313	ERBB4,AZGP1,PBLD,KCNJ1,SH3GL2,RBP4,NOX4,CUBN,SLC22A5
GO: Biological Process	GO:0033865	nucleoside bisphosphate metabolic process				0.00306	1	0.0446	0.396	6	150	GLYAT,PIPOX,HMGCS2,ACSM3,SULT1C2,EHHADH
GO: Biological Process	GO:0033875	ribonucleoside bisphosphate metabolic process				0.00306	1	0.0446	0.396	6	150	GLYAT,PIPOX,HMGCS2,ACSM3,SULT1C2,EHHADH
GO: Biological Process	GO:0034032	purine nucleoside bisphosphate metabolic process				0.00306	1	0.0446	0.396	6	150	GLYAT,PIPOX,HMGCS2,ACSM3,SULT1C2,EHHADH
GO: Biological Process	GO:0072197	ureter morphogenesis				0.00306	1	0.0446	0.396	2	9	LHX1,EMX2
GO: Biological Process	GO:0009750	response to fructose				0.00306	1	0.0446	0.396	2	9	PPARGC1A,PCK1
GO: Biological Process	GO:0042420	dopamine catabolic process				0.00306	1	0.0446	0.396	2	9	MAOA,MAOB
GO: Biological Process	GO:0070995	NADPH oxidation				0.00306	1	0.0446	0.396	2	9	FMO1,FMO5
GO: Biological Process	GO:0021796	cerebral cortex regionalization				0.00306	1	0.0446	0.396	2	9	ADGRG1,EMX2
GO: Biological Process	GO:0009175	pyrimidine ribonucleoside monophosphate catabolic process				0.00306	1	0.0446	0.396	2	9	UPB1,DPYS
GO: Biological Process	GO:0042402	cellular biogenic amine catabolic process				0.00307	1	0.0446	0.396	3	31	MAOA,MAOB,BHMT
GO: Biological Process	GO:1900027	regulation of ruffle assembly				0.00307	1	0.0446	0.396	3	31	COBL,NLGN1,TACSTD2
GO: Biological Process	GO:0051402	neuron apoptotic process				0.00308	1	0.0446	0.396	9	314	CHL1,PCP4,ERBB3,PPARGC1A,TOX3,RETREG1,FGFR3,TFAP2A,TFAP2B
GO: Biological Process	GO:0019319	hexose biosynthetic process				0.00322	1	0.0465	0.412	5	105	PPARGC1A,ALDOB,RBP4,G6PC1,PCK1
GO: Biological Process	GO:0044344	cellular response to fibroblast growth factor stimulus				0.00327	1	0.0469	0.416	6	152	KL,FGF9,FGFR3,FLRT3,HYAL1,LHX1
GO: Biological Process	GO:0038128	ERBB2 signaling pathway				0.00337	1	0.0482	0.428	3	32	ERBB3,ERBB4,EGF
GO: Biological Process	GO:0061326	renal tubule development				0.00349	1	0.0498	0.442	5	107	UMOD,CALB1,TFAP2B,LHX1,TACSTD2
GO: Cellular Component	GO:0045177	apical part of cell	1	1		1.68e-16	7.06e-14	7.06e-14	4.68e-13	31	510	CHL1,ERBB3,MAL,SLC17A3,SLC26A4,PDZK1,ACP3,FABP1,KL,CLIC5,UMOD,SLC5A12,MGAM,NOX4,REN,CUBN,SLC44A4,SLC2A2,SLC3A1,SLC7A9,ACE2,SLC10A2,SHANK2,SLC12A1,SLC15A2,SLC17A1,SLC22A2,SLC22A5,ATP6V0A4,LRP2,CDH1
GO: Cellular Component	GO:0016324	apical plasma membrane		1		2.65e-14	1.12e-11	5.57e-12	3.69e-11	26	414	ERBB3,MAL,SLC17A3,SLC26A4,PDZK1,KL,CLIC5,UMOD,SLC5A12,MGAM,NOX4,CUBN,SLC44A4,SLC2A2,SLC3A1,SLC7A9,ACE2,SLC10A2,SHANK2,SLC12A1,SLC15A2,SLC17A1,SLC22A2,SLC22A5,ATP6V0A4,LRP2
GO: Cellular Component	GO:0031526	brush border membrane		1		3.18e-13	1.34e-10	4.47e-11	2.96e-10	13	76	SLC17A3,SLC26A4,PDZK1,CUBN,SLC2A2,SLC3A1,SLC7A9,ACE2,SHANK2,SLC22A5,ATP6V0A4,MTTP,LRP2
GO: Cellular Component	GO:0098862	cluster of actin-based cell projections				1.5e-12	6.3e-10	1.58e-10	1.04e-09	18	208	SLC17A3,SLC26A4,PDZK1,CLIC5,PVALB,MME,PLS1,CALB1,CUBN,SLC2A2,SLC3A1,SLC7A9,ACE2,SHANK2,SLC22A5,ATP6V0A4,MTTP,LRP2
GO: Cellular Component	GO:0005903	brush border		1		5.95e-12	2.5e-09	5.01e-10	3.32e-09	15	141	SLC17A3,SLC26A4,PDZK1,MME,PLS1,CUBN,SLC2A2,SLC3A1,SLC7A9,ACE2,SHANK2,SLC22A5,ATP6V0A4,MTTP,LRP2
GO: Cellular Component	GO:0005884	actin filament				1.15e-11	4.86e-09	8.1e-10	5.36e-09	26	540	SLC17A3,SLC26A4,PDZK1,ACP3,CLIC5,PVALB,COBL,MME,PLS1,GPM6A,CALB1,NEBL,NOX4,NLGN1,CUBN,SLC2A2,SLC3A1,SLC7A9,CRYAB,ACE2,SLC10A2,SHANK2,SLC22A5,ATP6V0A4,MTTP,LRP2
GO: Cellular Component	GO:0098858	actin-based cell projection				1.46e-11	6.14e-09	8.77e-10	5.81e-09	22	380	SLC17A3,SLC26A4,PDZK1,ACP3,CLIC5,PVALB,MME,PLS1,GPM6A,CALB1,NLGN1,CUBN,SLC2A2,SLC3A1,SLC7A9,ACE2,SLC10A2,SHANK2,SLC22A5,ATP6V0A4,MTTP,LRP2
GO: Cellular Component	GO:0032432	actin filament bundle				1.64e-10	6.92e-08	8.65e-09	5.73e-08	19	312	SLC17A3,SLC26A4,PDZK1,MME,PLS1,NEBL,NOX4,CUBN,SLC2A2,SLC3A1,SLC7A9,CRYAB,ACE2,SLC10A2,SHANK2,SLC22A5,ATP6V0A4,MTTP,LRP2
GO: Cellular Component	GO:0009925	basal plasma membrane				3.97e-10	1.67e-07	1.86e-08	1.23e-07	18	291	ERBB3,ERBB4,KCNJ16,UMOD,SLC13A3,MAP7,CLDN8,SLC2A2,SLC4A1,SLCO4C1,SLC14A1,SLC22A2,SLC22A5,MTTP,SLC4A4,TACSTD2,CDH1,CDH16
GO: Cellular Component	GO:0016323	basolateral plasma membrane				4.45e-10	1.87e-07	1.87e-08	1.24e-07	17	257	ERBB3,ERBB4,KCNJ16,UMOD,SLC13A3,MAP7,CLDN8,SLC2A2,SLC4A1,SLCO4C1,SLC14A1,SLC22A2,SLC22A5,MTTP,SLC4A4,CDH1,CDH16
GO: Cellular Component	GO:0005902	microvillus		1		5.85e-10	2.46e-07	2.24e-08	1.48e-07	16	227	SLC17A3,SLC26A4,PDZK1,MME,PLS1,CUBN,SLC2A2,SLC3A1,SLC7A9,ACE2,SLC10A2,SHANK2,SLC22A5,ATP6V0A4,MTTP,LRP2
GO: Cellular Component	GO:0045178	basal part of cell	1	1		1.28e-09	5.37e-07	4.48e-08	2.96e-07	18	313	ERBB3,ERBB4,KCNJ16,UMOD,SLC13A3,MAP7,CLDN8,SLC2A2,SLC4A1,SLCO4C1,SLC14A1,SLC22A2,SLC22A5,MTTP,SLC4A4,TACSTD2,CDH1,CDH16
GO: Cellular Component	GO:0005887	integral component of plasma membrane				1.35e-08	5.67e-06	4.36e-07	2.89e-06	42	1735	TSPAN12,ERBB3,ERBB4,SLC17A3,SLC26A4,ADGRG1,CLEC4M,PLPPR1,NPHS2,KL,TRPM3,KCNJ1,KCNJ16,FGFR3,GPC5,FLRT3,MME,IL17RB,TRHDE,NPHS1,GPM6A,NOX4,NLGN1,SLC2A2,SLC3A1,TSPAN1,SLC4A1,SLC7A9,SLC10A2,SHANK2,SLCO4C1,SLC13A1,SLC16A4,SLC14A1,SLC15A2,SLC17A1,SLC22A2,TSPAN8,SLC4A4,FXYD2,CDH16,GABRA2
GO: Cellular Component	GO:0015629	actin cytoskeleton				2.91e-08	1.22e-05	8.73e-07	5.78e-06	27	837	SLC17A3,SLC26A4,PDZK1,ACP3,CLIC5,PVALB,COBL,MME,PLS1,GPM6A,CALB1,NEBL,NOX4,NLGN1,CUBN,SLC2A2,SLC3A1,SLC7A9,CRYAB,ACE2,SLC10A2,SHANK2,SLC22A5,ATP6V0A4,MTTP,LRP2,CDH1
GO: Cellular Component	GO:0031226	intrinsic component of plasma membrane				5.09e-08	2.14e-05	1.43e-06	9.46e-06	42	1818	TSPAN12,ERBB3,ERBB4,SLC17A3,SLC26A4,ADGRG1,CLEC4M,PLPPR1,NPHS2,KL,TRPM3,KCNJ1,KCNJ16,FGFR3,GPC5,FLRT3,MME,IL17RB,TRHDE,NPHS1,GPM6A,NOX4,NLGN1,SLC2A2,SLC3A1,TSPAN1,SLC4A1,SLC7A9,SLC10A2,SHANK2,SLCO4C1,SLC13A1,SLC16A4,SLC14A1,SLC15A2,SLC17A1,SLC22A2,TSPAN8,SLC4A4,FXYD2,CDH16,GABRA2
GO: Cellular Component	GO:0031253	cell projection membrane				4.96e-06	0.00209	0.00013	0.000863	15	388	SLC17A3,SLC26A4,PDZK1,UMOD,CUBN,SLC2A2,SLC3A1,SLC7A9,ACE2,SHANK2,SLC22A5,ATP6V0A4,MTTP,LRP2,GABRA2
GO: Cellular Component	GO:0099513	polymeric cytoskeletal fiber				1.34e-05	0.00565	0.000333	0.0022	30	1357	PCP4,SLC17A3,SLC26A4,PDZK1,ACP3,DEFB1,CLIC5,PVALB,COBL,MME,PLS1,GPM6A,KRT7,CALB1,NEBL,NOX4,NLGN1,CUBN,MAP7,SLC2A2,SLC3A1,SLC7A9,CRYAB,ACE2,SLC10A2,SHANK2,SLC22A5,ATP6V0A4,MTTP,LRP2
GO: Cellular Component	GO:0099081	supramolecular polymer				1.52e-05	0.00639	0.000355	0.00235	33	1580	PCP4,SLC17A3,SLC26A4,PDZK1,ACP3,DEFB1,CLIC5,PVALB,COBL,MME,PLS1,COL4A3,COL4A4,GPM6A,KRT7,CALB1,NEBL,NOX4,NLGN1,CUBN,MAP7,SLC2A2,SLC3A1,SLC4A1,SLC7A9,CRYAB,ACE2,SLC10A2,SHANK2,SLC22A5,ATP6V0A4,MTTP,LRP2
GO: Cellular Component	GO:0099512	supramolecular fiber				8.4e-05	0.0354	0.00186	0.0123	31	1572	PCP4,SLC17A3,SLC26A4,PDZK1,ACP3,DEFB1,CLIC5,PVALB,COBL,MME,PLS1,GPM6A,KRT7,CALB1,NEBL,NOX4,NLGN1,CUBN,MAP7,SLC2A2,SLC3A1,SLC4A1,SLC7A9,CRYAB,ACE2,SLC10A2,SHANK2,SLC22A5,ATP6V0A4,MTTP,LRP2
GO: Cellular Component	GO:0031907	microbody lumen				0.000192	0.0806	0.00384	0.0254	5	56	EPHX2,PIPOX,FABP1,EHHADH,HAO2
GO: Cellular Component	GO:0005782	peroxisomal matrix				0.000192	0.0806	0.00384	0.0254	5	56	EPHX2,PIPOX,FABP1,EHHADH,HAO2
GO: Cellular Component	GO:0031091	platelet alpha granule				0.000249	0.105	0.00477	0.0316	6	92	CLU,FGB,PLG,KNG1,EGF,SERPINA5
GO: Cellular Component	GO:0062023	collagen-containing extracellular matrix				0.000312	0.131	0.0057	0.0378	14	498	AZGP1,CLU,SBSPON,ANGPTL3,FGB,FGF9,GPC5,PLG,KNG1,NPHS1,COL4A3,COL4A4,ANXA3,SERPINA5
GO: Cellular Component	GO:0031012	extracellular matrix				0.000383	0.161	0.00667	0.0442	16	633	AZGP1,CCN6,CLU,SBSPON,ANGPTL3,FGB,FGF9,GPC5,FLRT3,PLG,KNG1,NPHS1,COL4A3,COL4A4,ANXA3,SERPINA5
GO: Cellular Component	GO:0030312	external encapsulating structure				0.000396	0.167	0.00667	0.0442	16	635	AZGP1,CCN6,CLU,SBSPON,ANGPTL3,FGB,FGF9,GPC5,FLRT3,PLG,KNG1,NPHS1,COL4A3,COL4A4,ANXA3,SERPINA5
GO: Cellular Component	GO:0031093	platelet alpha granule lumen				0.000445	0.187	0.0072	0.0477	5	67	CLU,FGB,PLG,KNG1,EGF
GO: Cellular Component	GO:0099080	supramolecular complex				0.000487	0.205	0.00759	0.0503	33	1895	PCP4,SLC17A3,SLC26A4,PDZK1,ACP3,DEFB1,CLIC5,PVALB,COBL,MME,PLS1,COL4A3,COL4A4,GPM6A,KRT7,CALB1,NEBL,NOX4,NLGN1,CUBN,MAP7,SLC2A2,SLC3A1,SLC4A1,SLC7A9,CRYAB,ACE2,SLC10A2,SHANK2,SLC22A5,ATP6V0A4,MTTP,LRP2
GO: Cellular Component	GO:1990357	terminal web				0.000534	0.225	0.00803	0.0532	2	4	COBL,PLS1
GO: Cellular Component	GO:0005777	peroxisome				0.000572	0.241	0.00803	0.0532	7	149	EPHX2,AOC1,PIPOX,FABP1,SLC27A2,EHHADH,HAO2
GO: Cellular Component	GO:0042579	microbody				0.000572	0.241	0.00803	0.0532	7	149	EPHX2,AOC1,PIPOX,FABP1,SLC27A2,EHHADH,HAO2
GO: Cellular Component	GO:0005938	cell cortex				0.000622	0.262	0.00845	0.0559	11	355	GAD1,FABP1,CLIC5,PVALB,FGB,COBL,NR3C2,PLS1,CALB1,SLC4A1,CDH1
GO: Cellular Component	GO:0044295	axonal growth cone				0.000736	0.31	0.00968	0.0641	4	43	COBL,FLRT3,GPM6A,LRP2
GO: Cellular Component	GO:0009986	cell surface				0.00112	0.47	0.0142	0.0939	21	1053	AZGP1,CLU,ANGPTL3,FGB,UMOD,FGFR3,GPC5,MME,PLG,IL17RB,NLGN1,CUBN,SLC4A1,CRYAB,ACE2,SLC12A1,TSPAN8,LRP2,SLC4A4,CDH1,SERPINA5
GO: Cellular Component	GO:0089717	spanning component of membrane				0.00115	0.482	0.0142	0.0939	3	22	NLGN1,SLC15A2,SLC4A4
GO: Cellular Component	GO:0030863	cortical cytoskeleton				0.00127	0.533	0.015	0.0991	6	125	PVALB,COBL,PLS1,CALB1,SLC4A1,CDH1
GO: Cellular Component	GO:0030424	axon				0.00128	0.539	0.015	0.0991	18	848	PCP4,GAD1,CLU,PVALB,COBL,FLRT3,MME,GPM6A,RAP1GAP,CALB1,ANXA3,SH3GL2,MAP7,CRYAB,SHANK2,LRP2,CDH1,GABRA2
GO: Cellular Component	GO:0005764	lysosome				0.00163	0.685	0.018	0.119	16	726	SLC17A3,ACP3,FGFR3,GPC5,ALDOB,HYAL1,TOM1L1,CUBN,TSPAN1,FRK,EGF,SLCO4C1,SLC17A1,ATP6V0A4,ASS1,LRP2
GO: Cellular Component	GO:0000323	lytic vacuole				0.00163	0.685	0.018	0.119	16	726	SLC17A3,ACP3,FGFR3,GPC5,ALDOB,HYAL1,TOM1L1,CUBN,TSPAN1,FRK,EGF,SLCO4C1,SLC17A1,ATP6V0A4,ASS1,LRP2
GO: Cellular Component	GO:0030864	cortical actin cytoskeleton				0.0017	0.715	0.0183	0.121	5	90	PVALB,COBL,PLS1,CALB1,CDH1
GO: Cellular Component	GO:0005587	collagen type IV trimer				0.00184	0.773	0.0193	0.128	2	7	COL4A3,COL4A4
GO: Cellular Component	GO:0045121	membrane raft				0.00205	0.864	0.021	0.139	11	412	ERBB4,MAL,PDZK1,ADGRG1,NPHS2,UMOD,MME,NPHS1,ACE2,LRP2,CDH1
GO: Cellular Component	GO:0098857	membrane microdomain				0.00209	0.88	0.021	0.139	11	413	ERBB4,MAL,PDZK1,ADGRG1,NPHS2,UMOD,MME,NPHS1,ACE2,LRP2,CDH1
GO: Cellular Component	GO:0098642	network-forming collagen trimer				0.00243	1	0.0228	0.151	2	8	COL4A3,COL4A4
GO: Cellular Component	GO:0098645	collagen network				0.00243	1	0.0228	0.151	2	8	COL4A3,COL4A4
GO: Cellular Component	GO:0034366	spherical high-density lipoprotein particle				0.00243	1	0.0228	0.151	2	8	APOM,CLU
GO: Cellular Component	GO:0072562	blood microparticle				0.00297	1	0.0272	0.18	6	148	CLU,AFM,FGB,PLG,KNG1,SLC4A1
GO: Cellular Component	GO:0098651	basement membrane collagen trimer				0.00311	1	0.0278	0.184	2	9	COL4A3,COL4A4
GO: Cellular Component	GO:0036056	filtration diaphragm				0.00386	1	0.0325	0.215	2	10	NPHS2,NPHS1
GO: Cellular Component	GO:0036057	slit diaphragm				0.00386	1	0.0325	0.215	2	10	NPHS2,NPHS1
GO: Cellular Component	GO:0031232	extrinsic component of external side of plasma membrane				0.00386	1	0.0325	0.215	2	10	PLG,CUBN
GO: Cellular Component	GO:0098793	presynapse				0.00523	1	0.0432	0.286	14	673	GAD1,ERBB4,DNAJC6,NR3C2,FLRT3,MME,GPM6A,CALB1,SH3GL2,NLGN1,SHANK2,SLC22A2,CDH1,GABRA2
GO: Cellular Component	GO:0030659	cytoplasmic vesicle membrane				0.00547	1	0.0443	0.293	16	822	GAD1,ACP3,TYRP1,MME,SLC27A2,MGAM,DSC1,ANXA3,SH3GL2,CUBN,EGF,SLCO4C1,ATP6V0A4,LRP2,SERPINA5,GABRA2
GO: Cellular Component	GO:0032421	stereocilium bundle				0.00572	1	0.0446	0.295	4	75	CLIC5,PVALB,PLS1,CALB1
GO: Cellular Component	GO:0032420	stereocilium				0.00572	1	0.0446	0.295	4	75	CLIC5,PVALB,PLS1,CALB1
GO: Cellular Component	GO:0030665	clathrin-coated vesicle membrane				0.00586	1	0.0449	0.297	5	120	GAD1,TYRP1,SH3GL2,EGF,LRP2
GO: Cellular Component	GO:0032437	cuticular plate				0.00657	1	0.0494	0.327	2	13	PVALB,CALB1
Human Phenotype	HP:0002157	Azotemia				2.32e-07	0.00065	0.000422	0.0036	16	209	SLC17A3,UMOD,FGFR3,ALDOB,NR1H4,COL4A3,COL4A4,REN,SLC2A2,SLC3A1,SLC7A9,SLC22A5,ATP6V0A4,ASS1,MTTP,G6PC1
Human Phenotype	HP:0004364	Abnormal circulating nitrogen compound concentration				3.02e-07	0.000845	0.000422	0.0036	16	213	SLC17A3,UMOD,FGFR3,ALDOB,NR1H4,COL4A3,COL4A4,REN,SLC2A2,SLC3A1,SLC7A9,SLC22A5,ATP6V0A4,ASS1,MTTP,G6PC1
Human Phenotype	HP:0010932	Abnormal circulating nucleobase concentration				9.75e-07	0.00273	0.00091	0.00775	12	127	SLC17A3,UMOD,ALDOB,DPYS,REN,SLC2A2,SLC3A1,SLC7A9,ATP6V0A4,ASS1,MTTP,G6PC1
Human Phenotype	HP:0000121	Nephrocalcinosis				1.44e-05	0.0404	0.00857	0.0729	8	68	CYP24A1,KL,KCNJ1,COL4A3,COL4A4,SLC4A1,SLC12A1,ATP6V0A4
Human Phenotype	HP:0004352	Abnormal circulating purine concentration				1.53e-05	0.0428	0.00857	0.0729	10	113	SLC17A3,UMOD,ALDOB,REN,SLC2A2,SLC3A1,SLC7A9,ATP6V0A4,MTTP,G6PC1
Human Phenotype	HP:0003111	Abnormal blood ion concentration				2.37e-05	0.0663	0.0106	0.0904	18	366	CYP24A1,KL,KCNJ1,NR3C2,FGFR3,HSD11B2,ALDOB,COL4A3,COL4A4,NEBL,SLC2A2,SLC3A1,SLC4A1,SLC7A9,SLC12A1,EGF,EHHADH,FXYD2
Human Phenotype	HP:0002149	Hyperuricemia				2.65e-05	0.0743	0.0106	0.0904	9	96	SLC17A3,UMOD,ALDOB,REN,SLC3A1,SLC7A9,ATP6V0A4,MTTP,G6PC1
Human Phenotype	HP:0011277	Abnormality of the urinary system physiology				3.62e-05	0.101	0.0127	0.108	34	1063	HGD,SLC26A4,CYP24A1,CCN6,NPHS2,KL,HPD,GLDC,KCNJ1,UMOD,FGFR3,PLG,ALDOB,COL4A3,COL4A4,NEBL,HYAL1,REN,CUBN,SLC2A2,SLC3A1,SLC4A1,SLC7A9,LHX1,SLC12A1,EGF,EHHADH,ATP6V0A4,ASS1,MTTP,LRP2,SLC4A4,FXYD2,G6PC1
Human Phenotype	HP:0004368	Increased circulating purine concentration				4.67e-05	0.131	0.0145	0.124	9	103	SLC17A3,UMOD,ALDOB,REN,SLC3A1,SLC7A9,ATP6V0A4,MTTP,G6PC1
Human Phenotype	HP:0000848	Increased circulating renin level				8.72e-05	0.244	0.0244	0.208	4	15	KCNJ1,NR3C2,HSD11B2,SLC12A1
Human Phenotype	HP:0011866	Abnormal urine anion concentration				9.7e-05	0.272	0.0247	0.21	9	113	KCNJ1,FGFR3,ALDOB,SLC2A2,SLC3A1,SLC7A9,SLC12A1,EHHADH,MTTP
Human Phenotype	HP:0003110	Abnormality of urine homeostasis				0.000133	0.372	0.03	0.256	26	751	HGD,CYP24A1,CCN6,NPHS2,HPD,GLDC,KCNJ1,FGFR3,ALDOB,COL4A3,COL4A4,NEBL,HYAL1,CUBN,SLC2A2,SLC3A1,SLC7A9,SLC12A1,EGF,EHHADH,ATP6V0A4,ASS1,MTTP,LRP2,FXYD2,G6PC1
Human Phenotype	HP:0012591	Abnormal urinary electrolyte concentration				0.000139	0.39	0.03	0.256	10	146	CYP24A1,KCNJ1,ALDOB,SLC2A2,SLC3A1,SLC7A9,SLC12A1,EGF,EHHADH,FXYD2
Human Phenotype	HP:0004360	Abnormality of acid-base homeostasis				0.000187	0.524	0.0374	0.319	20	508	CCN6,HPD,GLDC,KCNJ1,NR3C2,FGFR3,HSD11B2,ALDOB,DPYS,SLC2A2,SLC3A1,SLC4A1,SLC7A9,SLC12A1,EHHADH,ATP6V0A4,ASS1,MTTP,SLC4A4,G6PC1
Human Phenotype	HP:0011042	Abnormal blood potassium concentration				0.00022	0.615	0.041	0.349	8	99	KCNJ1,NR3C2,HSD11B2,SLC2A2,SLC4A1,SLC12A1,EHHADH,FXYD2
Human Phenotype	HP:0010909	Abnormal circulating arginine concentration				0.00024	0.672	0.042	0.358	3	8	SLC3A1,SLC7A9,ASS1
Human Phenotype	HP:0002900	Hypokalemia				0.000268	0.752	0.0424	0.361	7	77	KCNJ1,HSD11B2,SLC2A2,SLC4A1,SLC12A1,EHHADH,FXYD2
Human Phenotype	HP:0012211	Abnormal renal physiology				0.000273	0.763	0.0424	0.361	26	784	HGD,SLC26A4,CYP24A1,NPHS2,KL,KCNJ1,UMOD,FGFR3,PLG,ALDOB,COL4A3,COL4A4,NEBL,REN,SLC2A2,SLC3A1,SLC4A1,SLC7A9,LHX1,SLC12A1,EHHADH,ATP6V0A4,MTTP,SLC4A4,FXYD2,G6PC1
Mouse Phenotype	MP:0009643	abnormal urine homeostasis				6.63e-19	2.04e-15	2.04e-15	1.75e-14	33	394	HGD,ACADL,MAOB,SLC26A4,CYP24A1,BHMT,PRODH2,NPHS2,CLIC5,CLU,HPD,GLDC,KCNJ1,DIO1,UMOD,NR3C2,HSD11B2,NPHS1,COL4A3,COL4A4,REN,SIM1,TFAP2B,SLC3A1,SLC4A1,SLC7A9,SLC12A1,SLC13A1,SLC14A1,SLC22A5,ATP6V0A4,LRP2,SLC4A4
Mouse Phenotype	MP:0005502	abnormal renal/urinary system physiology				6.56e-17	2.01e-13	1.01e-13	8.66e-13	37	593	HGD,ACADL,MAOB,SLC26A4,CYP24A1,BHMT,PRODH2,NPHS2,CLIC5,CLU,HPD,GLDC,KCNJ1,DIO1,UMOD,NR3C2,HSD11B2,NPHS1,COL4A3,COL4A4,KRT7,SOSTDC1,NOX4,REN,SIM1,TFAP2B,SLC3A1,SLC4A1,SLC7A9,SLC12A1,SLC13A1,SLC14A1,SLC15A2,SLC22A5,ATP6V0A4,LRP2,SLC4A4
Mouse Phenotype	MP:0005367	renal/urinary system phenotype				1.66e-12	5.08e-09	1.69e-09	1.46e-08	49	1389	HGD,ACADL,MAOB,SLC26A4,CYP24A1,ESRRG,BHMT,NELL1,PPARGC1A,PRODH2,NPHS2,KL,CLIC5,CLU,HPD,GLDC,KCNJ1,DIO1,UMOD,NR3C2,HSD11B2,PLG,HSD17B2,RNF128,NPHS1,COL4A3,COL4A4,KRT7,SOSTDC1,CXCL14,NOX4,REN,SIM1,TFAP2B,SLC3A1,SLC4A1,SLC7A9,LHX1,SLC12A1,SLC13A1,SLC14A1,SLC15A2,SLC22A5,ATP6V0A4,LRP2,SLC4A4,EMX2,G6PC1,CDH6
Mouse Phenotype	MP:0005332	abnormal amino acid level				4.18e-12	1.28e-08	3.21e-09	2.76e-08	26	412	GAD1,UPB1,ACADL,EXPH5,BHMT,PRODH2,NPHS2,HPD,GLDC,UMOD,HSD11B2,BBOX1,COL4A3,COL4A4,SLC13A3,REN,TFAP2B,SLC3A1,ARG2,SLC7A9,RGN,SLC12A1,SLC14A1,SLC22A5,ASS1,PCK1
Mouse Phenotype	MP:0002703	abnormal renal tubule morphology		1		6.42e-11	1.97e-07	3.94e-08	3.39e-07	18	207	CYP24A1,NPHS2,UMOD,NR3C2,HSD11B2,HSD17B2,NPHS1,COL4A3,COL4A4,REN,TFAP2B,SLC3A1,SLC7A9,SLC12A1,ATP6V0A4,LRP2,SLC4A4,G6PC1
Mouse Phenotype	MP:0005311	abnormal circulating amino acid level				1.18e-10	3.63e-07	6.04e-08	5.2e-07	22	337	UPB1,ACADL,EXPH5,PRODH2,NPHS2,HPD,GLDC,UMOD,BBOX1,COL4A3,COL4A4,SLC13A3,REN,TFAP2B,SLC3A1,ARG2,SLC7A9,RGN,SLC12A1,SLC22A5,ASS1,PCK1
Mouse Phenotype	MP:0002136	abnormal kidney physiology				4.17e-10	1.28e-06	1.83e-07	1.57e-06	21	326	NPHS2,CLIC5,KCNJ1,UMOD,NR3C2,NPHS1,COL4A3,COL4A4,SOSTDC1,NOX4,REN,TFAP2B,SLC3A1,SLC4A1,SLC7A9,SLC12A1,SLC13A1,SLC14A1,SLC15A2,SLC22A5,SLC4A4
Mouse Phenotype	MP:0003881	abnormal nephron morphology				1.22e-09	3.74e-06	4.68e-07	4.03e-06	22	381	CYP24A1,ESRRG,NPHS2,CLIC5,CLU,UMOD,NR3C2,HSD11B2,HSD17B2,NPHS1,COL4A3,COL4A4,REN,TFAP2B,SLC3A1,SLC7A9,SLC12A1,ATP6V0A4,LRP2,SLC4A4,G6PC1,CDH6
Mouse Phenotype	MP:0003014	abnormal kidney medulla morphology				6.47e-09	1.99e-05	2.21e-06	1.9e-05	9	49	ESRRG,KL,UMOD,HSD17B2,NPHS1,REN,SLC3A1,SLC4A1,SLC12A1
Mouse Phenotype	MP:0002705	dilated renal tubules				2.03e-08	6.23e-05	6.19e-06	5.33e-05	11	95	CYP24A1,NPHS2,HSD11B2,NPHS1,COL4A4,REN,TFAP2B,SLC3A1,SLC7A9,SLC4A4,G6PC1
Mouse Phenotype	MP:0011468	abnormal urine amino acid level				2.22e-08	6.81e-05	6.19e-06	5.33e-05	9	56	PRODH2,GLDC,UMOD,HSD11B2,SLC3A1,SLC7A9,SLC12A1,SLC14A1,SLC22A5
Mouse Phenotype	MP:0001762	polyuria				3.39e-08	0.000104	8.68e-06	7.47e-05	10	78	KCNJ1,UMOD,HSD11B2,COL4A3,COL4A4,REN,SLC4A1,SLC12A1,SLC14A1,ATP6V0A4
Mouse Phenotype	MP:0010107	abnormal renal reabsorption		1		4.42e-08	0.000136	1.04e-05	8.98e-05	7	29	NR3C2,NPHS1,SLC12A1,SLC13A1,SLC15A2,SLC22A5,SLC4A4
Mouse Phenotype	MP:0013285	abnormal renal filtration		1		1.03e-07	0.000316	2.26e-05	0.000195	8	48	KCNJ1,UMOD,COL4A3,COL4A4,REN,SLC4A1,SLC12A1,SLC14A1
Mouse Phenotype	MP:0012551	metabolic acidosis				1.11e-07	0.000342	2.28e-05	0.000196	5	11	KCNJ1,REN,SLC4A1,SLC12A1,SLC4A4
Mouse Phenotype	MP:0030604	abnormal ammonia homeostasis				1.41e-07	0.000433	2.59e-05	0.000223	6	21	SLC26A4,UMOD,SLC22A5,ASS1,SLC4A4,PCK1
Mouse Phenotype	MP:0002988	decreased urine osmolality				1.44e-07	0.000441	2.59e-05	0.000223	8	50	KCNJ1,UMOD,REN,TFAP2B,SLC4A1,SLC12A1,SLC14A1,SLC4A4
Mouse Phenotype	MP:0002135	abnormal kidney morphology				2.46e-07	0.000754	4.19e-05	0.00036	33	1040	CYP24A1,ESRRG,NELL1,PPARGC1A,NPHS2,KL,CLIC5,CLU,GLDC,KCNJ1,DIO1,UMOD,NR3C2,HSD11B2,PLG,HSD17B2,NPHS1,COL4A3,COL4A4,CXCL14,REN,TFAP2B,SLC3A1,SLC4A1,SLC7A9,LHX1,SLC12A1,ATP6V0A4,LRP2,SLC4A4,EMX2,G6PC1,CDH6
Mouse Phenotype	MP:0002987	abnormal urine osmolality				4.72e-07	0.00145	7.63e-05	0.000657	8	58	KCNJ1,UMOD,REN,TFAP2B,SLC4A1,SLC12A1,SLC14A1,SLC4A4
Mouse Phenotype	MP:0001756	abnormal urination				5.67e-07	0.00174	8.7e-05	0.000749	11	131	KCNJ1,UMOD,HSD11B2,COL4A3,COL4A4,REN,SLC3A1,SLC4A1,SLC12A1,SLC14A1,ATP6V0A4
Mouse Phenotype	MP:0003031	acidosis				7.24e-07	0.00222	0.000102	0.000879	6	27	KCNJ1,REN,SLC4A1,SLC12A1,ATP6V0A4,SLC4A4
Mouse Phenotype	MP:0000516	abnormal renal/urinary system morphology				7.32e-07	0.00225	0.000102	0.000879	34	1145	CYP24A1,ESRRG,NELL1,PPARGC1A,NPHS2,KL,CLIC5,CLU,GLDC,KCNJ1,DIO1,UMOD,NR3C2,HSD11B2,PLG,HSD17B2,RNF128,NPHS1,COL4A3,COL4A4,CXCL14,REN,TFAP2B,SLC3A1,SLC4A1,SLC7A9,LHX1,SLC12A1,ATP6V0A4,LRP2,SLC4A4,EMX2,G6PC1,CDH6
Mouse Phenotype	MP:0004194	abnormal kidney pelvis morphology				8.33e-07	0.00256	0.000111	0.000957	10	109	ESRRG,GLDC,KCNJ1,UMOD,REN,SLC3A1,SLC7A9,SLC12A1,ATP6V0A4,LRP2
Mouse Phenotype	MP:0005584	abnormal enzyme/coenzyme activity				8.71e-07	0.00268	0.000112	0.000959	14	231	GAD1,ACADL,KL,ANGPTL3,UMOD,NR3C2,MGAM,GPX3,ACE2,RGN,SLC12A1,SLC13A1,ASS1,LRP2
Mouse Phenotype	MP:0004970	kidney atrophy				1.72e-06	0.00527	0.000211	0.00181	7	48	COL4A3,COL4A4,REN,SLC3A1,SLC4A1,SLC4A4,G6PC1
Mouse Phenotype	MP:0010028	aciduria				1.98e-06	0.00608	0.000231	0.00199	7	49	HGD,ACADL,PRODH2,GLDC,SLC3A1,SLC7A9,SLC22A5
Mouse Phenotype	MP:0000519	hydronephrosis				2.1e-06	0.00645	0.000231	0.00199	9	94	GLDC,KCNJ1,UMOD,REN,SLC3A1,SLC7A9,SLC12A1,ATP6V0A4,LRP2
Mouse Phenotype	MP:0002985	abnormal urine calcium level				2.11e-06	0.00647	0.000231	0.00199	6	32	CYP24A1,UMOD,TFAP2B,SLC4A1,SLC12A1,SLC4A4
Mouse Phenotype	MP:0009644	uremia				2.45e-06	0.00752	0.000259	0.00223	15	289	NPHS2,UMOD,COL4A3,COL4A4,SLC13A3,REN,TFAP2B,SLC3A1,SLC4A1,SLC12A1,SLC16A4,SLC14A1,ATP6V0A4,SLC4A4,PCK1
Mouse Phenotype	MP:0003197	nephrocalcinosis				3.42e-06	0.0105	0.00035	0.00301	5	20	KL,UMOD,SLC4A1,SLC12A1,ATP6V0A4
Mouse Phenotype	MP:0030663	abnormal arginine level				4.26e-06	0.0131	0.000397	0.00341	4	10	SLC3A1,ARG2,SLC7A9,ASS1
Mouse Phenotype	MP:0011377	renal glomerulus fibrosis				4.26e-06	0.0131	0.000397	0.00341	4	10	CLU,NPHS1,COL4A3,REN
Mouse Phenotype	MP:0001429	dehydration				4.26e-06	0.0131	0.000397	0.00341	8	77	GAD1,SPINK1,KL,KCNJ1,NR3C2,REN,SLC4A1,ATP6V0A4
Mouse Phenotype	MP:0005441	increased urine calcium level				5.69e-06	0.0175	0.000514	0.00443	5	22	CYP24A1,UMOD,SLC4A1,SLC12A1,SLC4A4
Mouse Phenotype	MP:0006325	impaired hearing				6.07e-06	0.0186	0.000532	0.00458	12	200	SLC26A4,ESRRG,KL,CLIC5,FGFR3,PLS1,COL4A3,COL4A4,TFAP2A,ATP6V0A4,LRP2,EMX2
Mouse Phenotype	MP:0009350	decreased urine pH				6.64e-06	0.0204	0.000566	0.00487	4	11	SLC26A4,UMOD,ATP6V0A4,SLC4A4
Mouse Phenotype	MP:0004043	abnormal pH regulation				7.07e-06	0.0217	0.000582	0.00501	6	39	KCNJ1,REN,SLC4A1,SLC12A1,ATP6V0A4,SLC4A4
Mouse Phenotype	MP:0009348	abnormal urine pH				7.21e-06	0.0221	0.000582	0.00501	5	23	SLC26A4,UMOD,SLC4A1,ATP6V0A4,SLC4A4
Mouse Phenotype	MP:0003311	aminoaciduria				9.01e-06	0.0277	0.000709	0.00611	5	24	PRODH2,GLDC,SLC3A1,SLC7A9,SLC22A5
Mouse Phenotype	MP:0005565	increased blood urea nitrogen level				1.15e-05	0.0354	0.000884	0.00761	12	213	NPHS2,UMOD,COL4A3,COL4A4,REN,TFAP2B,SLC4A1,SLC12A1,SLC16A4,SLC14A1,ATP6V0A4,PCK1
Mouse Phenotype	MP:0011941	increased fluid intake				1.27e-05	0.0388	0.000947	0.00815	8	89	KCNJ1,UMOD,NR1H4,COL4A4,REN,SLC12A1,SLC14A1,ATP6V0A4
Mouse Phenotype	MP:0003985	renal fibrosis				1.36e-05	0.0419	0.000962	0.00828	7	65	KL,CLU,UMOD,NPHS1,COL4A3,COL4A4,REN
Mouse Phenotype	MP:0005556	abnormal renal filtration rate				1.37e-05	0.042	0.000962	0.00828	5	26	UMOD,COL4A4,SLC4A1,SLC12A1,SLC14A1
Mouse Phenotype	MP:0005528	decreased renal glomerular filtration rate				1.41e-05	0.0433	0.000962	0.00828	4	13	KCNJ1,UMOD,COL4A3,REN
Mouse Phenotype	MP:0008997	increased blood osmolality				1.41e-05	0.0433	0.000962	0.00828	4	13	UMOD,SLC2A2,SLC4A1,ATP6V0A4
Mouse Phenotype	MP:0011346	renal tubule atrophy				1.66e-05	0.051	0.00111	0.00955	5	27	COL4A3,COL4A4,REN,SLC4A4,G6PC1
Mouse Phenotype	MP:0030664	increased arginine level				1.76e-05	0.0541	0.00115	0.00991	3	5	SLC3A1,ARG2,SLC7A9
Mouse Phenotype	MP:0008996	abnormal blood osmolality				1.96e-05	0.0601	0.00125	0.0108	4	14	UMOD,SLC2A2,SLC4A1,ATP6V0A4
Mouse Phenotype	MP:0006274	abnormal urine sodium level				2.15e-05	0.0659	0.00135	0.0116	6	47	UMOD,NR3C2,HSD11B2,COL4A4,SLC12A1,SLC4A4
Mouse Phenotype	MP:0002989	small kidney				2.51e-05	0.0772	0.00154	0.0133	14	309	NELL1,KL,UMOD,HSD17B2,COL4A3,COL4A4,CXCL14,REN,TFAP2B,SLC3A1,SLC4A1,SLC4A4,EMX2,G6PC1
Mouse Phenotype	MP:0002706	abnormal kidney size				2.91e-05	0.0893	0.00175	0.0151	18	490	NELL1,PPARGC1A,KL,UMOD,HSD11B2,PLG,HSD17B2,NPHS1,COL4A3,COL4A4,CXCL14,REN,TFAP2B,SLC3A1,SLC4A1,SLC4A4,EMX2,G6PC1
Mouse Phenotype	MP:0002707	abnormal kidney weight				3e-05	0.0921	0.00177	0.0152	9	130	PPARGC1A,UMOD,HSD17B2,NPHS1,CXCL14,REN,SLC3A1,SLC4A4,G6PC1
Mouse Phenotype	MP:0005325	abnormal renal glomerulus morphology				3.48e-05	0.107	0.00192	0.0165	12	238	ESRRG,NPHS2,CLIC5,CLU,UMOD,NR3C2,NPHS1,COL4A3,COL4A4,REN,SLC3A1,G6PC1
Mouse Phenotype	MP:0004757	abnormal distal convoluted tubule morphology				3.49e-05	0.107	0.00192	0.0165	4	16	NR3C2,HSD11B2,NPHS1,REN
Mouse Phenotype	MP:0011734	abnormal urine ammonia level				3.49e-05	0.107	0.00192	0.0165	3	6	SLC26A4,UMOD,SLC4A4
Mouse Phenotype	MP:0002829	abnormal juxtaglomerular apparatus morphology				3.49e-05	0.107	0.00192	0.0165	3	6	UMOD,NR3C2,REN
Mouse Phenotype	MP:0005553	increased circulating creatinine level				3.59e-05	0.11	0.00194	0.0167	9	133	NPHS2,UMOD,COL4A3,COL4A4,SLC13A3,REN,TFAP2B,SLC3A1,SLC12A1
Mouse Phenotype	MP:0000521	abnormal kidney cortex morphology				4.63e-05	0.142	0.00245	0.0211	13	285	ESRRG,NPHS2,KL,CLIC5,CLU,UMOD,NR3C2,NPHS1,COL4A3,COL4A4,REN,SLC3A1,G6PC1
Mouse Phenotype	MP:0005265	abnormal blood urea nitrogen level				5.17e-05	0.159	0.00266	0.0229	14	330	BHMT,NPHS2,UMOD,COL4A3,COL4A4,SLC13A3,REN,TFAP2B,SLC4A1,SLC12A1,SLC16A4,SLC14A1,ATP6V0A4,PCK1
Mouse Phenotype	MP:0005328	abnormal circulating creatinine level				5.19e-05	0.159	0.00266	0.0229	12	248	UPB1,EXPH5,NPHS2,UMOD,BBOX1,COL4A3,COL4A4,SLC13A3,REN,TFAP2B,SLC3A1,SLC12A1
Mouse Phenotype	MP:0008140	podocyte foot process effacement				5.35e-05	0.164	0.00267	0.0229	5	34	NPHS2,CLIC5,NPHS1,COL4A3,COL4A4
Mouse Phenotype	MP:0002069	abnormal consumption behavior				5.38e-05	0.165	0.00267	0.0229	20	612	GAD1,MAOA,ESRRG,PPARGC1A,CLIC5,KCNJ1,UMOD,FGF9,FGFR3,HSD11B2,NR1H4,COL4A4,FMO5,CXCL14,REN,SIM1,SLC12A1,SLC14A1,ATP6V0A4,PCK1
Mouse Phenotype	MP:0004193	abnormal kidney papilla morphology				5.76e-05	0.177	0.00281	0.0241	4	18	ESRRG,UMOD,REN,SLC12A1
Mouse Phenotype	MP:0004847	abnormal liver weight				6.26e-05	0.192	0.003	0.0258	11	214	BHMT,KL,ANGPTL3,RNF128,NR1H4,GRB14,CXCL14,SLC3A1,SHANK2,SLC13A1,G6PC1
Mouse Phenotype	MP:0004740	sensorineural hearing loss				7.1e-05	0.218	0.0033	0.0284	5	36	SLC26A4,FGFR3,COL4A3,COL4A4,EMX2
Mouse Phenotype	MP:0006329	sensorineural hearing impairment				7.1e-05	0.218	0.0033	0.0284	5	36	SLC26A4,FGFR3,COL4A3,COL4A4,EMX2
Mouse Phenotype	MP:0004192	abnormal kidney pyramid morphology				7.22e-05	0.222	0.00331	0.0285	4	19	ESRRG,UMOD,REN,SLC12A1
Mouse Phenotype	MP:0002827	abnormal renal corpuscle morphology				7.89e-05	0.242	0.00355	0.0306	12	259	ESRRG,NPHS2,CLIC5,CLU,UMOD,NR3C2,NPHS1,COL4A3,COL4A4,REN,SLC3A1,G6PC1
Mouse Phenotype	MP:0003918	decreased kidney weight				7.99e-05	0.245	0.00355	0.0306	6	59	UMOD,HSD17B2,CXCL14,REN,SLC3A1,SLC4A4
Mouse Phenotype	MP:0005360	urolithiasis				8.94e-05	0.275	0.00392	0.0338	4	20	UMOD,SLC3A1,SLC7A9,ATP6V0A4
Mouse Phenotype	MP:0000031	abnormal cochlea morphology				9.82e-05	0.301	0.00425	0.0365	11	225	TSPAN12,SLC26A4,TYRP1,CLIC5,FGF9,FGFR3,PLS1,COL4A3,ATP6V0A4,LRP2,EMX2
Mouse Phenotype	MP:0011947	abnormal fluid intake				0.000103	0.317	0.0044	0.0379	8	119	KCNJ1,UMOD,NR1H4,COL4A4,REN,SLC12A1,SLC14A1,ATP6V0A4
Mouse Phenotype	MP:0000530	abnormal kidney blood vessel morphology				0.000106	0.325	0.00445	0.0383	6	62	NPHS2,CLIC5,CLU,COL4A3,REN,TFAP2B
Mouse Phenotype	MP:0009641	kidney degeneration				0.000119	0.366	0.00495	0.0426	5	40	KL,UMOD,HSD17B2,SLC7A9,CDH6
Mouse Phenotype	MP:0002847	abnormal renal glomerular filtration rate				0.000132	0.407	0.00542	0.0467	4	22	KCNJ1,UMOD,COL4A3,REN
Mouse Phenotype	MP:0011353	expanded mesangial matrix				0.000134	0.413	0.00543	0.0467	5	41	NPHS2,CLU,NPHS1,COL4A3,COL4A4
Mouse Phenotype	MP:0004366	abnormal strial marginal cell morphology				0.000143	0.438	0.00548	0.0472	3	9	SLC26A4,COL4A3,LRP2
Mouse Phenotype	MP:0009645	crystalluria				0.000143	0.438	0.00548	0.0472	3	9	UMOD,SLC3A1,SLC7A9
Mouse Phenotype	MP:0031230	abnormal circulating angiotensin II level				0.000143	0.438	0.00548	0.0472	3	9	NR3C2,REN,ACE2
Mouse Phenotype	MP:0031227	abnormal angiotensin II level				0.000143	0.438	0.00548	0.0472	3	9	NR3C2,REN,ACE2
Mouse Phenotype	MP:0020402	ornithinuria				0.000151	0.462	0.0055	0.0474	2	2	SLC3A1,SLC7A9
Mouse Phenotype	MP:0020403	lysinuria				0.000151	0.462	0.0055	0.0474	2	2	SLC3A1,SLC7A9
Mouse Phenotype	MP:0011299	abnormal macula densa morphology				0.000151	0.462	0.0055	0.0474	2	2	NR3C2,REN
Mouse Phenotype	MP:0011296	decreased tubuloglomerular feedback response				0.000151	0.462	0.0055	0.0474	2	2	KCNJ1,SLC12A1
Mouse Phenotype	MP:0003349	abnormal circulating renin level				0.000159	0.488	0.00567	0.0488	4	23	NR3C2,REN,SLC12A1,SLC4A4
Mouse Phenotype	MP:0005106	abnormal incus morphology				0.000159	0.488	0.00567	0.0488	4	23	KL,FGFR3,TFAP2A,EMX2
Mouse Phenotype	MP:0000048	abnormal stria vascularis morphology				0.000169	0.52	0.00598	0.0514	5	43	TSPAN12,SLC26A4,TYRP1,COL4A3,LRP2
Mouse Phenotype	MP:0006316	increased urine sodium level				0.000189	0.58	0.00652	0.0561	4	24	UMOD,NR3C2,SLC12A1,SLC4A4
Mouse Phenotype	MP:0011338	abnormal mesangial matrix morphology				0.000189	0.581	0.00652	0.0561	5	44	NPHS2,CLU,NPHS1,COL4A3,COL4A4
Mouse Phenotype	MP:0006357	abnormal circulating mineral level				0.000191	0.586	0.00652	0.0561	21	725	EXPH5,CYP24A1,KL,KCNJ1,FGB,UMOD,NR3C2,GPC5,HSD11B2,KRT7,NOX4,REN,TFAP2B,SLC4A1,CRYAB,SLC12A1,SLC13A1,SLC16A4,ATP6V0A4,LRP2,SLC4A4
Mouse Phenotype	MP:0002082	postnatal lethality				0.000199	0.61	0.0067	0.0577	26	1007	ERBB3,SPINK1,CYP24A1,ESRRG,DNAJC6,PPARGC1A,NPHS2,GLDC,KCNJ1,FGF9,NR3C2,FGFR3,FLRT3,HSD11B2,NPHS1,REN,TFAP2B,SLC2A2,SLC4A1,SHANK2,SLC12A1,ATP6V0A4,ASS1,SLC4A4,PCK1,GABRA2
Mouse Phenotype	MP:0011422	kidney medulla atrophy				0.000202	0.621	0.00675	0.0581	3	10	REN,SLC3A1,SLC4A1
Mouse Phenotype	MP:0003606	kidney failure				0.000211	0.647	0.00696	0.0599	5	45	NPHS2,UMOD,COL4A3,COL4A4,SLC12A1
Mouse Phenotype	MP:0000316	cellular necrosis				0.000217	0.666	0.00709	0.061	10	206	KL,UMOD,MME,PLG,NR1H4,SLC7A9,CRYAB,MTTP,G6PC1,CDH6
Mouse Phenotype	MP:0013284	abnormal renal glomerular filtration				0.000223	0.683	0.00719	0.0619	4	25	KCNJ1,UMOD,COL4A3,REN
Mouse Phenotype	MP:0002628	hepatic steatosis				0.000235	0.72	0.0075	0.0646	10	208	ACADL,BHMT,PPARGC1A,ALDOB,NR1H4,RGN,SLC22A5,MTTP,G6PC1,PCK1
Mouse Phenotype	MP:0000192	abnormal mineral level				0.00024	0.737	0.0076	0.0654	22	792	EXPH5,CYP24A1,KL,KCNJ1,FGB,UMOD,NR3C2,GPC5,HSD11B2,KRT7,GPX3,NOX4,REN,TFAP2B,SLC4A1,CRYAB,SLC12A1,SLC13A1,SLC16A4,ATP6V0A4,LRP2,SLC4A4
Mouse Phenotype	MP:0004756	abnormal proximal convoluted tubule morphology				0.000243	0.746	0.00762	0.0655	6	72	NPHS2,UMOD,NPHS1,REN,TFAP2B,LRP2
Mouse Phenotype	MP:0011471	decreased urine creatinine level				0.000261	0.8	0.008	0.0689	4	26	UMOD,HSD11B2,SLC12A1,SLC14A1
Mouse Phenotype	MP:0003946	renal necrosis				0.000261	0.8	0.008	0.0689	4	26	KL,UMOD,SLC7A9,CDH6
Mouse Phenotype	MP:0011967	increased or absent threshold for auditory brainstem response				0.000284	0.872	0.00841	0.0724	10	213	SLC26A4,ESRRG,CLIC5,FGFR3,PLS1,COL4A3,COL4A4,RGN,ATP6V0A4,LRP2
Mouse Phenotype	MP:0004426	abnormal cochlear labyrinth morphology				0.000284	0.872	0.00841	0.0724	10	213	TSPAN12,SLC26A4,TYRP1,CLIC5,FGFR3,PLS1,COL4A3,ATP6V0A4,LRP2,EMX2
Mouse Phenotype	MP:0003169	abnormal scala media morphology				0.000284	0.872	0.00841	0.0724	10	213	TSPAN12,SLC26A4,TYRP1,CLIC5,FGFR3,PLS1,COL4A3,ATP6V0A4,LRP2,EMX2
Mouse Phenotype	MP:0005636	abnormal mineral homeostasis				0.000286	0.878	0.00841	0.0724	22	802	EXPH5,CYP24A1,KL,KCNJ1,FGB,UMOD,NR3C2,GPC5,HSD11B2,KRT7,GPX3,NOX4,REN,TFAP2B,SLC4A1,CRYAB,SLC12A1,SLC13A1,SLC16A4,ATP6V0A4,LRP2,SLC4A4
Mouse Phenotype	MP:0001422	abnormal drinking behavior				0.000288	0.883	0.00841	0.0724	8	138	KCNJ1,UMOD,NR1H4,COL4A4,REN,SLC12A1,SLC14A1,ATP6V0A4
Mouse Phenotype	MP:0006317	decreased urine sodium level				0.000303	0.93	0.00878	0.0755	4	27	UMOD,HSD11B2,COL4A4,SLC12A1
Mouse Phenotype	MP:0008059	abnormal podocyte foot process morphology				0.000316	0.971	0.00907	0.0781	5	49	NPHS2,CLIC5,NPHS1,COL4A3,COL4A4
Mouse Phenotype	MP:0005107	abnormal stapes morphology				0.000402	1	0.0114	0.0985	4	29	KL,FGFR3,TFAP2A,EMX2
Mouse Phenotype	MP:0005400	abnormal vitamin level				0.000419	1	0.0116	0.0999	5	52	CYP24A1,KL,GLDC,RBP4,RGN
Mouse Phenotype	MP:0004676	wide ribs				0.000443	1	0.0116	0.0999	2	3	KL,FGF9
Mouse Phenotype	MP:0020401	argininuria				0.000443	1	0.0116	0.0999	2	3	SLC3A1,SLC7A9
Mouse Phenotype	MP:0030721	increased lysine level				0.000443	1	0.0116	0.0999	2	3	SLC3A1,SLC7A9
Mouse Phenotype	MP:0011603	decreased glutathione peroxidase activity				0.000443	1	0.0116	0.0999	2	3	GPX3,LRP2
Mouse Phenotype	MP:0011601	abnormal glutathione peroxidase activity				0.000443	1	0.0116	0.0999	2	3	GPX3,LRP2
Mouse Phenotype	MP:0012580	decreased peroxidase activity				0.000443	1	0.0116	0.0999	2	3	GPX3,LRP2
Mouse Phenotype	MP:0011295	abnormal tubuloglomerular feedback response				0.000443	1	0.0116	0.0999	2	3	KCNJ1,SLC12A1
Mouse Phenotype	MP:0011735	increased urine ammonia level				0.000443	1	0.0116	0.0999	2	3	SLC26A4,UMOD
Mouse Phenotype	MP:0003830	abnormal testis development				0.00046	1	0.0119	0.102	4	30	ADGRG1,FGF9,SLC14A1,LRP2
Mouse Phenotype	MP:0004820	abnormal urine potassium level				0.00046	1	0.0119	0.102	4	30	UMOD,HSD11B2,COL4A4,SLC12A1
Mouse Phenotype	MP:0011465	abnormal urine urea nitrogen level				0.000469	1	0.012	0.103	3	13	UMOD,SLC12A1,SLC14A1
Mouse Phenotype	MP:0000026	abnormal inner ear morphology				0.000492	1	0.0125	0.107	11	271	TSPAN12,SLC26A4,TYRP1,CLIC5,FGF9,FGFR3,PLS1,COL4A3,ATP6V0A4,LRP2,EMX2
Mouse Phenotype	MP:0002871	albuminuria				0.000499	1	0.0126	0.108	5	54	NPHS2,CLIC5,NPHS1,COL4A3,COL4A4
Mouse Phenotype	MP:0011402	renal cast				0.000523	1	0.0131	0.112	4	31	NPHS2,COL4A3,COL4A4,SLC7A9
Mouse Phenotype	MP:0003015	abnormal circulating bicarbonate level				0.000592	1	0.0143	0.123	3	14	SLC26A4,SLC4A1,SLC4A4
Mouse Phenotype	MP:0005308	abnormal circulating ammonia level				0.000592	1	0.0143	0.123	3	14	SLC22A5,ASS1,PCK1
Mouse Phenotype	MP:0005309	increased circulating ammonia level				0.000592	1	0.0143	0.123	3	14	SLC22A5,ASS1,PCK1
Mouse Phenotype	MP:0011469	abnormal urine creatinine level				0.000592	1	0.0143	0.123	4	32	UMOD,HSD11B2,SLC12A1,SLC14A1
Mouse Phenotype	MP:0004019	abnormal vitamin homeostasis				0.000642	1	0.0154	0.133	5	57	CYP24A1,KL,GLDC,RBP4,RGN
Mouse Phenotype	MP:0000029	abnormal malleus morphology				0.000668	1	0.0159	0.137	4	33	KL,FGFR3,TFAP2A,EMX2
Mouse Phenotype	MP:0001565	abnormal circulating phosphate level				0.000682	1	0.0161	0.139	8	157	EXPH5,KL,FGB,UMOD,GPC5,TFAP2B,SLC4A1,CRYAB
Mouse Phenotype	MP:0000035	abnormal membranous labyrinth morphology				0.000703	1	0.0164	0.141	10	239	TSPAN12,SLC26A4,TYRP1,CLIC5,FGFR3,PLS1,COL4A3,ATP6V0A4,LRP2,EMX2
Mouse Phenotype	MP:0005266	abnormal metabolism				0.000704	1	0.0164	0.141	20	743	EPHX2,GAD1,ACADL,PPARGC1A,KL,ANGPTL3,DIO1,UMOD,NR3C2,MGAM,FMO5,GPX3,NOX4,CRYAB,ACE2,RGN,SLC12A1,SLC13A1,ASS1,LRP2
Mouse Phenotype	MP:0020885	abnormal phosphate level				0.000711	1	0.0164	0.141	8	158	EXPH5,KL,FGB,UMOD,GPC5,TFAP2B,SLC4A1,CRYAB
Mouse Phenotype	MP:0003372	abnormal circulating mineralocorticoid level				0.000749	1	0.0168	0.144	4	34	NR3C2,HSD11B2,REN,SLC4A4
Mouse Phenotype	MP:0005346	abnormal circulating aldosterone level				0.000749	1	0.0168	0.144	4	34	NR3C2,HSD11B2,REN,SLC4A4
Mouse Phenotype	MP:0001426	polydipsia				0.000749	1	0.0168	0.144	4	34	KCNJ1,REN,SLC12A1,ATP6V0A4
Mouse Phenotype	MP:0011497	abnormal glomerular capsule visceral layer morphology				0.000753	1	0.0168	0.144	5	59	NPHS2,CLIC5,NPHS1,COL4A3,COL4A4
Mouse Phenotype	MP:0005326	abnormal podocyte morphology				0.000753	1	0.0168	0.144	5	59	NPHS2,CLIC5,NPHS1,COL4A3,COL4A4
Mouse Phenotype	MP:0012224	abnormal sterol level				0.000765	1	0.0169	0.145	20	748	PDZK1,CYP24A1,BHMT,APOM,PPARGC1A,KL,TOX3,ANGPTL3,DIO1,UMOD,RNF128,NR1H4,KRT7,FMO5,CXCL14,SLC3A1,RGN,SLC10A2,MTTP,G6PC1
Mouse Phenotype	MP:0001765	abnormal ion homeostasis				0.000774	1	0.017	0.146	23	921	EXPH5,SLC26A4,CYP24A1,PRODH2,KL,KCNJ1,FGB,UMOD,NR3C2,GPC5,HSD11B2,COL4A4,KRT7,NEBL,NOX4,REN,TFAP2B,SLC4A1,CRYAB,SLC12A1,SLC16A4,ATP6V0A4,SLC4A4
Mouse Phenotype	MP:0002118	abnormal lipid homeostasis				0.000783	1	0.0171	0.147	32	1475	EPHX2,ACADL,AZGP1,PDZK1,CYP24A1,FABP1,BHMT,APOM,PPARGC1A,KL,TOX3,ANGPTL3,DIO1,UMOD,NR3C2,HSD11B2,RNF128,NR1H4,KRT7,FMO5,CXCL14,REN,SLC2A2,SLC3A1,RGN,SLC10A2,SLC13A1,EHHADH,MTTP,SLC4A4,G6PC1,PCK1
Mouse Phenotype	MP:0002843	decreased systemic arterial blood pressure				0.000858	1	0.0183	0.158	6	91	EPHX2,KCNJ1,UMOD,REN,ACE2,SLC12A1
Mouse Phenotype	MP:0005557	increased creatinine clearance				0.000878	1	0.0183	0.158	2	4	UMOD,SLC12A1
Mouse Phenotype	MP:0008309	dilated scala media				0.000878	1	0.0183	0.158	2	4	SLC26A4,ATP6V0A4
Mouse Phenotype	MP:0030275	thin frontal bone				0.000878	1	0.0183	0.158	2	4	NELL1,FGFR3
Mouse Phenotype	MP:0001775	abnormal selenium level				0.000878	1	0.0183	0.158	2	4	GPX3,LRP2
Mouse Phenotype	MP:0011300	abnormal juxtaglomerular cell morphology				0.000878	1	0.0183	0.158	2	4	NR3C2,REN
Mouse Phenotype	MP:0005161	hematuria				0.000894	1	0.0185	0.16	3	16	CLU,COL4A3,COL4A4
Mouse Phenotype	MP:0005264	glomerulosclerosis				0.000945	1	0.0195	0.168	5	62	NPHS2,UMOD,COL4A3,COL4A4,REN
Mouse Phenotype	MP:0002828	abnormal renal glomerular capsule morphology				0.000962	1	0.0197	0.169	6	93	NPHS2,CLIC5,UMOD,NPHS1,COL4A3,COL4A4
Mouse Phenotype	MP:0002981	increased liver weight				0.00102	1	0.0208	0.179	7	129	BHMT,ANGPTL3,RNF128,NR1H4,SLC3A1,SLC13A1,G6PC1
Mouse Phenotype	MP:0011415	abnormal aldosterone level				0.00104	1	0.0208	0.179	4	37	NR3C2,HSD11B2,REN,SLC4A4
Mouse Phenotype	MP:0006264	decreased systemic arterial systolic blood pressure				0.00104	1	0.0208	0.179	4	37	EPHX2,UMOD,REN,SLC12A1
Mouse Phenotype	MP:0003352	increased circulating renin level				0.00108	1	0.0213	0.183	3	17	NR3C2,SLC12A1,SLC4A4
Mouse Phenotype	MP:0005558	decreased creatinine clearance				0.00108	1	0.0213	0.183	3	17	UMOD,COL4A4,SLC4A1
Mouse Phenotype	MP:0001547	abnormal lipid level				0.00122	1	0.0239	0.206	30	1385	EPHX2,ACADL,PDZK1,CYP24A1,FABP1,BHMT,APOM,PPARGC1A,KL,TOX3,ANGPTL3,DIO1,UMOD,NR3C2,HSD11B2,RNF128,NR1H4,KRT7,FMO5,CXCL14,REN,SLC2A2,SLC3A1,RGN,SLC10A2,SLC13A1,MTTP,SLC4A4,G6PC1,PCK1
Mouse Phenotype	MP:0011506	glomerular crescent				0.00128	1	0.0249	0.214	3	18	NPHS2,COL4A3,COL4A4
Mouse Phenotype	MP:0000434	megacephaly				0.00128	1	0.0249	0.214	3	18	NELL1,FGFR3,HSD17B2
Mouse Phenotype	MP:0001846	increased inflammatory response				0.00131	1	0.0252	0.217	22	898	SLC26A4,PPARGC1A,KL,CLU,UMOD,PIP5K1B,MME,PLG,RNF128,ALDOB,PLS1,NR1H4,COL4A3,COL4A4,DSC1,HYAL1,REN,LGALS2,SLC3A1,SLC7A9,ACE2,SLC12A1
Mouse Phenotype	MP:0020887	abnormal potassium level				0.00133	1	0.0255	0.219	8	174	EXPH5,UMOD,NR3C2,HSD11B2,COL4A4,REN,SLC12A1,ATP6V0A4
Mouse Phenotype	MP:0011978	abnormal potassium ion homeostasis				0.00138	1	0.0263	0.226	8	175	EXPH5,UMOD,NR3C2,HSD11B2,COL4A4,REN,SLC12A1,ATP6V0A4
Mouse Phenotype	MP:0030647	increased ornithine level				0.00145	1	0.0265	0.228	2	5	SLC3A1,SLC7A9
Mouse Phenotype	MP:0020400	cystinuria				0.00145	1	0.0265	0.228	2	5	SLC3A1,SLC7A9
Mouse Phenotype	MP:0030720	abnormal lysine level				0.00145	1	0.0265	0.228	2	5	SLC3A1,SLC7A9
Mouse Phenotype	MP:0012579	abnormal peroxidase activity				0.00145	1	0.0265	0.228	2	5	GPX3,LRP2
Mouse Phenotype	MP:0003653	decreased skin turgor				0.00145	1	0.0265	0.228	2	5	KCNJ1,SLC12A1
Mouse Phenotype	MP:0011799	increased urinary bladder weight				0.00145	1	0.0265	0.228	2	5	SLC3A1,SLC7A9
Mouse Phenotype	MP:0011798	abnormal urinary bladder weight				0.00145	1	0.0265	0.228	2	5	SLC3A1,SLC7A9
Mouse Phenotype	MP:0004773	abnormal bile composition				0.00151	1	0.0274	0.235	3	19	ACADL,NR1H4,SLC10A2
Mouse Phenotype	MP:0011320	abnormal glomerular capillary morphology				0.00153	1	0.0277	0.238	4	41	NPHS2,CLIC5,CLU,COL4A3
Mouse Phenotype	MP:0000189	hypoglycemia				0.00155	1	0.0279	0.24	6	102	ACADL,PPARGC1A,KL,SLC22A5,G6PC1,PCK1
Mouse Phenotype	MP:0006315	abnormal urine protein level				0.00158	1	0.0282	0.243	7	139	NPHS2,CLIC5,UMOD,NPHS1,COL4A3,COL4A4,LRP2
Mouse Phenotype	MP:0011310	abnormal kidney capillary morphology				0.00168	1	0.0298	0.256	4	42	NPHS2,CLIC5,CLU,COL4A3
Mouse Phenotype	MP:0011085	postnatal lethality, complete penetrance				0.00169	1	0.0298	0.256	13	414	ERBB3,SPINK1,ESRRG,NPHS2,NR3C2,NPHS1,REN,TFAP2B,SLC2A2,SLC4A1,SLC12A1,SLC4A4,PCK1
Mouse Phenotype	MP:0000194	increased circulating calcium level				0.0018	1	0.0316	0.272	6	105	CYP24A1,KL,UMOD,NOX4,SLC12A1,SLC4A4
Mouse Phenotype	MP:0011339	abnormal glomerular mesangium morphology				0.00185	1	0.0323	0.278	5	72	NPHS2,CLU,NPHS1,COL4A3,COL4A4
Mouse Phenotype	MP:0005418	abnormal circulating hormone level				0.00195	1	0.0338	0.291	23	987	MAOA,FABP1,APOM,PPARGC1A,KL,CLIC5,DIO1,NR3C2,HSD11B2,NR1H4,MGAM,CXCL14,REN,SIM1,TFAP2B,SLC2A2,ACE2,FRK,SLC12A1,SLC13A1,C21orf62,LRP2,SLC4A4
Mouse Phenotype	MP:0011405	tubulointerstitial nephritis				0.00203	1	0.035	0.301	3	21	COL4A4,SLC3A1,SLC7A9
Mouse Phenotype	MP:0001963	abnormal hearing physiology				0.00205	1	0.0352	0.303	15	529	GIPC2,SLC26A4,ESRRG,TYRP1,KL,CLIC5,FGFR3,PLS1,COL4A3,COL4A4,TFAP2A,RGN,ATP6V0A4,LRP2,EMX2
Mouse Phenotype	MP:0006419	disorganized testis cords				0.00216	1	0.0358	0.308	2	6	ADGRG1,FGF9
Mouse Phenotype	MP:0030677	abnormal hydroxyproline level				0.00216	1	0.0358	0.308	2	6	PRODH2,RGN
Mouse Phenotype	MP:0004386	enlarged interparietal bone				0.00216	1	0.0358	0.308	2	6	NELL1,FGFR3
Mouse Phenotype	MP:0031232	increased circulating angiotensin II level				0.00216	1	0.0358	0.308	2	6	NR3C2,ACE2
Mouse Phenotype	MP:0031229	increased angiotensin II level				0.00216	1	0.0358	0.308	2	6	NR3C2,ACE2
Mouse Phenotype	MP:0009051	dilated distal convoluted tubules				0.00216	1	0.0358	0.308	2	6	HSD11B2,NPHS1
Mouse Phenotype	MP:0012778	abnormal liver triglyceride level				0.00217	1	0.0359	0.309	7	147	FABP1,PPARGC1A,NR1H4,CXCL14,RGN,MTTP,PCK1
Mouse Phenotype	MP:0000198	decreased circulating phosphate level				0.00222	1	0.0365	0.314	5	75	EXPH5,FGB,UMOD,GPC5,CRYAB
Mouse Phenotype	MP:0002630	abnormal endocochlear potential				0.00233	1	0.0378	0.326	3	22	SLC26A4,TYRP1,ATP6V0A4
Mouse Phenotype	MP:0006390	abnormal cochlear endolymph				0.00233	1	0.0378	0.326	3	22	SLC26A4,TYRP1,ATP6V0A4
Mouse Phenotype	MP:0003674	oxidative stress				0.00239	1	0.0386	0.332	6	111	PPARGC1A,KL,NOX4,ACE2,RGN,ASS1
Mouse Phenotype	MP:0002102	abnormal ear morphology				0.00245	1	0.0393	0.339	13	432	TSPAN12,SLC26A4,TYRP1,KL,CLIC5,FGF9,FGFR3,PLS1,COL4A3,TFAP2A,ATP6V0A4,LRP2,EMX2
Mouse Phenotype	MP:0006335	abnormal hearing electrophysiology				0.00246	1	0.0393	0.339	14	485	GIPC2,SLC26A4,ESRRG,TYRP1,CLIC5,FGFR3,PLS1,COL4A3,COL4A4,TFAP2A,RGN,ATP6V0A4,LRP2,EMX2
Mouse Phenotype	MP:0010832	lethality during fetal growth through weaning				0.0025	1	0.0397	0.342	37	1918	GAD1,ERBB3,SPINK1,CYP24A1,ESRRG,DNAJC6,NELL1,TYRP1,PPARGC1A,NPHS2,GLDC,KCNJ1,FGF9,NR3C2,FGFR3,FLRT3,HSD11B2,HSD17B2,NPHS1,SOSTDC1,CXCL14,REN,SIM1,TFAP2A,TFAP2B,SLC2A2,SLC4A1,LHX1,SHANK2,SLC12A1,ATP6V0A4,ASS1,LRP2,SLC4A4,EMX2,PCK1,GABRA2
Mouse Phenotype	MP:0001859	kidney inflammation				0.00253	1	0.04	0.345	7	151	UMOD,COL4A3,COL4A4,REN,SLC3A1,SLC7A9,SLC12A1
Mouse Phenotype	MP:0004885	abnormal endolymph				0.00266	1	0.0414	0.356	3	23	SLC26A4,TYRP1,ATP6V0A4
Mouse Phenotype	MP:0009050	dilated proximal convoluted tubules				0.00266	1	0.0414	0.356	3	23	NPHS2,NPHS1,TFAP2B
Mouse Phenotype	MP:0010027	increased liver cholesterol level				0.00266	1	0.0414	0.356	3	23	NR1H4,RGN,MTTP
Mouse Phenotype	MP:0003215	renal interstitial fibrosis				0.00276	1	0.0427	0.368	4	48	UMOD,COL4A3,COL4A4,REN
Mouse Phenotype	MP:0006358	absent pinna reflex				0.00295	1	0.0429	0.37	5	80	SLC26A4,KL,TFAP2A,ATP6V0A4,EMX2
Mouse Phenotype	MP:0011367	abnormal kidney apoptosis				0.00297	1	0.0429	0.37	4	49	UMOD,SOSTDC1,NOX4,TFAP2B
Mouse Phenotype	MP:0001845	abnormal inflammatory response				0.00299	1	0.0429	0.37	24	1083	SLC26A4,PPARGC1A,KL,CLU,UMOD,PIP5K1B,MME,PLG,RNF128,ALDOB,PLS1,NR1H4,IL17RB,COL4A3,COL4A4,DSC1,HYAL1,NOX4,REN,LGALS2,SLC3A1,SLC7A9,ACE2,SLC12A1
Mouse Phenotype	MP:0003353	decreased circulating renin level				0.003	1	0.0429	0.37	2	7	REN,SLC12A1
Mouse Phenotype	MP:0011871	podocyte hypertrophy				0.003	1	0.0429	0.37	2	7	NPHS2,COL4A4
Mouse Phenotype	MP:0011868	podocyte microvillus transformation				0.003	1	0.0429	0.37	2	7	NPHS2,COL4A3
Mouse Phenotype	MP:0030646	abnormal ornithine level				0.003	1	0.0429	0.37	2	7	SLC3A1,SLC7A9
Mouse Phenotype	MP:0030660	abnormal circulating arginine level				0.003	1	0.0429	0.37	2	7	ARG2,ASS1
Mouse Phenotype	MP:0030281	thin parietal bone				0.003	1	0.0429	0.37	2	7	NELL1,FGFR3
Mouse Phenotype	MP:0011534	granular kidney				0.003	1	0.0429	0.37	2	7	COL4A3,REN
Mouse Phenotype	MP:0004410	absent endocochlear potential				0.003	1	0.0429	0.37	2	7	SLC26A4,ATP6V0A4
Mouse Phenotype	MP:0003652	abnormal skin turgor				0.003	1	0.0429	0.37	2	7	KCNJ1,SLC12A1
Mouse Phenotype	MP:0004109	abnormal Sertoli cell development				0.003	1	0.0429	0.37	2	7	FGF9,SLC14A1
Mouse Phenotype	MP:0011363	renal glomerulus atrophy				0.003	1	0.0429	0.37	2	7	REN,G6PC1
Mouse Phenotype	MP:0003373	increased circulating mineralocorticoid level				0.00301	1	0.0429	0.37	3	24	NR3C2,REN,SLC4A4
Mouse Phenotype	MP:0004377	small frontal bone				0.00301	1	0.0429	0.37	3	24	NELL1,FGFR3,TFAP2A
Mouse Phenotype	MP:0002666	increased circulating aldosterone level				0.00301	1	0.0429	0.37	3	24	NR3C2,REN,SLC4A4
Mouse Phenotype	MP:0002204	abnormal neurotransmitter level				0.00304	1	0.0431	0.371	7	156	GAD1,ERBB3,MAOA,BHMT,PPARGC1A,KL,GLDC
Mouse Phenotype	MP:0011089	perinatal lethality, complete penetrance				0.00324	1	0.0458	0.394	9	246	GAD1,ERBB3,NELL1,TYRP1,FGF9,FGFR3,TFAP2A,LHX1,LRP2
Mouse Phenotype	MP:0011762	renal/urinary system inflammation				0.00326	1	0.0459	0.395	7	158	UMOD,COL4A3,COL4A4,REN,SLC3A1,SLC7A9,SLC12A1
Mouse Phenotype	MP:0003953	abnormal hormone level				0.00329	1	0.0462	0.397	24	1091	ERBB3,MAOA,FABP1,APOM,PPARGC1A,KL,CLIC5,DIO1,NR3C2,HSD11B2,NR1H4,MGAM,CXCL14,REN,SIM1,TFAP2B,SLC2A2,ACE2,FRK,SLC12A1,SLC13A1,C21orf62,LRP2,SLC4A4
Mouse Phenotype	MP:0011427	increased mesangial cell number				0.00339	1	0.0473	0.407	3	25	CLU,NPHS1,COL4A3
Mouse Phenotype	MP:0004754	abnormal kidney collecting duct morphology				0.00344	1	0.0478	0.411	4	51	KL,UMOD,HSD17B2,SLC4A4
Domain	IPR020846	MFS_dom			InterPro	7.03e-05	0.0802	0.0153	0.117	8	134	SLC17A3,SLC2A2,SLCO4C1,SLC16A4,SLC15A2,SLC17A1,SLC22A2,SLC22A5
Domain	PF09469	Cobl			Pfam	0.000105	0.119	0.0153	0.117	2	2	COBL,COBLL1
Domain	IPR017226	Betaine-hCys_S-MeTrfase_BHMT			InterPro	0.000105	0.119	0.0153	0.117	2	2	BHMT,BHMT2
Domain	IPR019025	Cordon-bleu_ubiquitin_domain			InterPro	0.000105	0.119	0.0153	0.117	2	2	COBL,COBLL1
Domain	PS50850	MFS			PROSITE	0.00012	0.137	0.0153	0.117	7	108	SLC17A3,SLC2A2,SLCO4C1,SLC16A4,SLC17A1,SLC22A2,SLC22A5
Domain	IPR017853	Glycoside_hydrolase_SF			InterPro	0.000202	0.23	0.0153	0.117	5	53	KL,MGAM,HYAL1,SLC3A1,GBA3
Domain	IPR009030	Growth_fac_rcpt_			InterPro	0.000202	0.231	0.0153	0.117	8	156	ERBB3,ERBB4,CCN6,NELL1,UMOD,CUBN,EGF,LRP2
Domain	IPR024731	EGF_dom			InterPro	0.000214	0.245	0.0153	0.117	3	12	NELL1,UMOD,CUBN
Domain	PF12947	EGF_3			Pfam	0.000214	0.245	0.0153	0.117	3	12	NELL1,UMOD,CUBN
Domain	3.50.50.60	-			Gene3D	0.000262	0.299	0.0153	0.117	5	56	MAOA,MAOB,PIPOX,FMO1,FMO5
Domain	IPR023753	FAD/NAD-binding_dom			InterPro	0.000285	0.325	0.0153	0.117	5	57	MAOA,MAOB,PIPOX,FMO1,FMO5
Domain	IPR023696	Ureohydrolase_domain			InterPro	0.000308	0.352	0.0153	0.117	2	3	ARG2,AGMAT
Domain	IPR001613	Flavin_amine_oxidase			InterPro	0.000308	0.352	0.0153	0.117	2	3	MAOA,MAOB
Domain	IPR006035	Ureohydrolase			InterPro	0.000308	0.352	0.0153	0.117	2	3	ARG2,AGMAT
Domain	PF02574	S-methyl_trans			Pfam	0.000308	0.352	0.0153	0.117	2	3	BHMT,BHMT2
Domain	IPR020855	Ureohydrolase_Mn_BS			InterPro	0.000308	0.352	0.0153	0.117	2	3	ARG2,AGMAT
Domain	3.40.800.10	-			Gene3D	0.000308	0.352	0.0153	0.117	2	3	ARG2,AGMAT
Domain	PS51409	ARGINASE_2			PROSITE	0.000308	0.352	0.0153	0.117	2	3	ARG2,AGMAT
Domain	PS50970	HCY			PROSITE	0.000308	0.352	0.0153	0.117	2	3	BHMT,BHMT2
Domain	IPR003726	HCY_dom			InterPro	0.000308	0.352	0.0153	0.117	2	3	BHMT,BHMT2
Domain	PS01053	ARGINASE_1			PROSITE	0.000308	0.352	0.0153	0.117	2	3	ARG2,AGMAT
Domain	3.20.20.330	-			Gene3D	0.000308	0.352	0.0153	0.117	2	3	BHMT,BHMT2
Domain	PF00491	Arginase			Pfam	0.000308	0.352	0.0153	0.117	2	3	ARG2,AGMAT
Domain	IPR033132	Glyco_hydro_1_N_CS			InterPro	0.000612	0.699	0.0269	0.205	2	4	KL,GBA3
Domain	IPR018120	Glyco_hydro_1_AS			InterPro	0.000612	0.699	0.0269	0.205	2	4	KL,GBA3
Domain	IPR016245	Tyr_kinase_EGF/ERB/XmrK_rcpt			InterPro	0.000612	0.699	0.0269	0.205	2	4	ERBB3,ERBB4
Domain	IPR004979	TF_AP2			InterPro	0.00101	1	0.0289	0.22	2	5	TFAP2A,TFAP2B
Domain	IPR001898	Na/sul_symport			InterPro	0.00101	1	0.0289	0.22	2	5	SLC13A3,SLC13A1
Domain	IPR013854	TF_AP2_C			InterPro	0.00101	1	0.0289	0.22	2	5	TFAP2A,TFAP2B
Domain	PS00572	GLYCOSYL_HYDROL_F1_1			PROSITE	0.00101	1	0.0289	0.22	2	5	KL,GBA3
Domain	PF00232	Glyco_hydro_1			Pfam	0.00101	1	0.0289	0.22	2	5	KL,GBA3
Domain	IPR000960	Flavin_mOase			InterPro	0.00101	1	0.0289	0.22	2	5	FMO1,FMO5
Domain	PF03299	TF_AP-2			Pfam	0.00101	1	0.0289	0.22	2	5	TFAP2A,TFAP2B
Domain	IPR012143	DiMe-aniline_mOase			InterPro	0.00101	1	0.0289	0.22	2	5	FMO1,FMO5
Domain	PF00743	FMO-like			Pfam	0.00101	1	0.0289	0.22	2	5	FMO1,FMO5
Domain	SM00473	PAN_AP			SMART	0.00101	1	0.0289	0.22	2	5	PLG,MST1L
Domain	PS00653	GLYCOSYL_HYDROL_F1_2			PROSITE	0.00101	1	0.0289	0.22	2	5	KL,GBA3
Domain	PF00939	Na_sulph_symp			Pfam	0.00101	1	0.0289	0.22	2	5	SLC13A3,SLC13A1
Domain	IPR020946	Flavin_mOase-like			InterPro	0.00101	1	0.0289	0.22	2	5	FMO1,FMO5
Domain	IPR001360	Glyco_hydro_1			InterPro	0.00101	1	0.0289	0.22	2	5	KL,GBA3
Domain	IPR018503	Tetraspanin_CS			InterPro	0.00121	1	0.0338	0.257	3	21	TSPAN12,TSPAN1,TSPAN8
Domain	SM00111	C4			SMART	0.00151	1	0.0359	0.274	2	6	COL4A3,COL4A4
Domain	IPR001442	Collagen_VI_NC			InterPro	0.00151	1	0.0359	0.274	2	6	COL4A3,COL4A4
Domain	PF14843	GF_recep_IV			Pfam	0.00151	1	0.0359	0.274	2	6	ERBB3,ERBB4
Domain	IPR032778	GF_recep_IV			InterPro	0.00151	1	0.0359	0.274	2	6	ERBB3,ERBB4
Domain	PS51403	NC1_IV			PROSITE	0.00151	1	0.0359	0.274	2	6	COL4A3,COL4A4
Domain	2.170.240.10	-			Gene3D	0.00151	1	0.0359	0.274	2	6	COL4A3,COL4A4
Domain	PF01413	C4			Pfam	0.00151	1	0.0359	0.274	2	6	COL4A3,COL4A4
Domain	PS00216	SUGAR_TRANSPORT_1			PROSITE	0.0018	1	0.0393	0.299	3	24	SLC2A2,SLC22A2,SLC22A5
Domain	PF07645	EGF_CA			Pfam	0.00187	1	0.0393	0.299	5	86	NELL1,UMOD,CUBN,EGF,LRP2
Domain	PF01049	Cadherin_C			Pfam	0.00203	1	0.0393	0.299	3	25	DSC1,CDH1,CDH6
Domain	IPR000233	Cadherin_cytoplasmic-dom			InterPro	0.00203	1	0.0393	0.299	3	25	DSC1,CDH1,CDH6
Domain	IPR003609	Pan_app			InterPro	0.0021	1	0.0393	0.299	2	7	PLG,MST1L
Domain	PF01030	Recep_L_domain			Pfam	0.0021	1	0.0393	0.299	2	7	ERBB3,ERBB4
Domain	PF08758	Cadherin_pro			Pfam	0.0021	1	0.0393	0.299	2	7	DSC1,CDH1
Domain	PF00757	Furin-like			Pfam	0.0021	1	0.0393	0.299	2	7	ERBB3,ERBB4
Domain	IPR000494	Rcpt_L-dom			InterPro	0.0021	1	0.0393	0.299	2	7	ERBB3,ERBB4
Domain	PS50948	PAN			PROSITE	0.0021	1	0.0393	0.299	2	7	PLG,MST1L
Domain	IPR006211	Furin-like_Cys-rich_dom			InterPro	0.0021	1	0.0393	0.299	2	7	ERBB3,ERBB4
Domain	3.80.20.20	-			Gene3D	0.0021	1	0.0393	0.299	2	7	ERBB3,ERBB4
Domain	PF00024	PAN_1			Pfam	0.0021	1	0.0393	0.299	2	7	PLG,MST1L
Domain	PS00421	TM4_1			PROSITE	0.00228	1	0.042	0.32	3	26	TSPAN12,TSPAN1,TSPAN8
Domain	SM01055	Cadherin_pro			SMART	0.00278	1	0.0496	0.378	2	8	DSC1,CDH1
Domain	IPR014868	Cadherin_pro_dom			InterPro	0.00278	1	0.0496	0.378	2	8	DSC1,CDH1
Pathway	132956	Metabolic pathways			BioSystems: KEGG	3.38e-11	4.64e-08	4.64e-08	3.62e-07	43	1272	EPHX2,HGD,GAD1,CDS1,UPB1,AOC1,MAOA,ACADL,MAOB,CYP3A5,CYP24A1,PIPOX,HMGCS2,BHMT,ADH6,TYRP1,PRODH2,KL,ACSM3,HPD,GLDC,BHMT2,PIP5K1B,UGT2B28,HSD17B2,ALDOB,GALNT14,MGAM,DPYS,HYAL1,ARG2,GBA3,RGN,EHHADH,UGT2A3,ATP6V0A4,ASS1,AGMAT,OGDHL,CYP4F3,G6PC1,HAO2,PCK1
Pathway	1269907	SLC-mediated transmembrane transport		1	BioSystems: REACTOME	4.36e-09	5.99e-06	2.99e-06	2.34e-05	18	287	SLC26A4,SLC5A12,SLC13A3,SLC44A4,SLC2A2,SLC3A1,SLC4A1,SLC7A9,SLC12A1,SLCO4C1,SLC13A1,SLC14A1,SLC15A2,SLC17A1,SLC22A2,SLC22A5,SLC4A4,G6PC1
Pathway	M39812	Proximal tubule transport	1	1	MSigDB C2 BIOCARTA (v7.3)	2.77e-07	0.00038	0.000127	0.000988	8	58	SLC13A3,SLC2A2,SLC3A1,SLC7A9,SLC22A2,ATP6V0A4,SLC4A4,FXYD2
Pathway	1269903	Transmembrane transport of small molecules		1	BioSystems: REACTOME	7.12e-07	0.000977	0.000244	0.00191	24	680	SLC17A3,AZGP1,SLC26A4,TRPM3,SLC5A12,SLC13A3,SLC44A4,SLC2A2,SLC3A1,SLC4A1,SLC7A9,SLC12A1,SLCO4C1,SLC13A1,SLC14A1,SLC15A2,SLC17A1,SLC22A2,SLC22A5,ATP6V0A4,SLC4A4,FXYD2,G6PC1,GABRA2
Pathway	MAP00350_Tyrosine_metabolism	MAP00350 Tyrosine metabolism			GenMAPP	9.32e-07	0.00128	0.000256	0.002	6	30	HGD,AOC1,MAOA,MAOB,ADH6,HPD
Pathway	83032	Drug metabolism - cytochrome P450			BioSystems: KEGG	1.22e-06	0.00167	0.000278	0.00217	8	70	MAOA,MAOB,CYP3A5,ADH6,UGT2B28,FMO1,FMO5,UGT2A3
Pathway	M9257	Drug metabolism - cytochrome P450			MSigDB C2 BIOCARTA (v7.3)	1.51e-06	0.00207	0.000296	0.00231	8	72	MAOA,MAOB,CYP3A5,ADH6,UGT2B28,FMO1,FMO5,UGT2A3
Pathway	1270189	Biological oxidations			BioSystems: REACTOME	2.11e-06	0.00289	0.000334	0.00261	13	229	GLYAT,AOC1,MAOA,MAOB,CYP3A5,CYP24A1,ADH6,SULT1C2,UGT2B28,NR1H4,FMO1,UGT2A3,CYP4F3
Pathway	82959	Tyrosine metabolism			BioSystems: KEGG	2.43e-06	0.00333	0.000334	0.00261	6	35	HGD,MAOA,MAOB,ADH6,TYRP1,HPD
Pathway	M2551	Arginine and proline metabolism			MSigDB C2 BIOCARTA (v7.3)	2.43e-06	0.00334	0.000334	0.00261	7	54	AOC1,MAOA,MAOB,PRODH2,ARG2,ASS1,AGMAT
Pathway	1269908	Transport of inorganic cations/anions and amino acids/oligopeptides		1	BioSystems: REACTOME	3.51e-06	0.00481	0.000437	0.00341	9	107	SLC26A4,SLC5A12,SLC3A1,SLC4A1,SLC7A9,SLC12A1,SLC15A2,SLC17A1,SLC4A4
Pathway	MAP00330_Arginine_and_proline_metabolism	MAP00330 Arginine and proline metabolism			GenMAPP	4.02e-06	0.00551	0.00046	0.00359	6	38	AOC1,MAOA,MAOB,ARG2,ASS1,AGMAT
Pathway	1270190	Phase 1 - Functionalization of compounds			BioSystems: REACTOME	4.75e-06	0.00652	0.000499	0.00389	9	111	AOC1,MAOA,MAOB,CYP3A5,CYP24A1,ADH6,NR1H4,FMO1,CYP4F3
Pathway	MAP00260_Glycine_serine_and_threonine_metabolism	MAP00260 Glycine serine and threonine metabolism			GenMAPP	5.09e-06	0.00699	0.000499	0.00389	5	23	AOC1,MAOA,MAOB,BHMT,GLDC
Pathway	SMP00006	Tyrosine Metabolism			SMPDB	6.37e-06	0.00874	0.000583	0.00455	5	24	HGD,AOC1,MAOA,HPD,NOX4
Pathway	M16743	Tyrosine metabolism			MSigDB C2 BIOCARTA (v7.3)	7.36e-06	0.0101	0.000631	0.00492	6	42	HGD,MAOA,MAOB,ADH6,TYRP1,HPD
Pathway	M39588	Metapathway biotransformation Phase I and II			MSigDB C2 BIOCARTA (v7.3)	8.51e-06	0.0117	0.000687	0.00536	11	185	EPHX2,GLYAT,CYP3A5,CYP24A1,SULT1C2,UGT2B28,FMO1,FMO5,GPX3,UGT2A3,CYP4F3
Pathway	M12950	Angiotensin-converting enzyme 2 regulates heart function			MSigDB C2 BIOCARTA (v7.3)	1.06e-05	0.0146	0.000802	0.00626	4	13	COL4A3,COL4A4,REN,ACE2
Pathway	M39864	Nephrotic syndrome			MSigDB C2 BIOCARTA (v7.3)	1.11e-05	0.0152	0.000802	0.00626	6	45	NPHS2,GPC5,NPHS1,COL4A3,COL4A4,CUBN
Pathway	PW:0000077	beta-alanine metabolic			Pathway Ontology	1.48e-05	0.0202	0.00101	0.0079	4	14	GAD1,UPB1,AOC1,DPYS
Pathway	82957	Arginine and proline metabolism			BioSystems: KEGG	2.07e-05	0.0284	0.00135	0.0105	6	50	AOC1,MAOA,MAOB,PRODH2,ARG2,AGMAT
Pathway	M766	Glycine, serine and threonine metabolism			MSigDB C2 BIOCARTA (v7.3)	2.39e-05	0.0328	0.00149	0.0116	5	31	MAOA,MAOB,PIPOX,BHMT,GLDC
Pathway	MAP00360_Phenylalanine_metabolism	MAP00360 Phenylalanine metabolism			GenMAPP	2.64e-05	0.0362	0.00157	0.0123	4	16	AOC1,MAOA,MAOB,HPD
Pathway	1339147	Metabolism of fat-soluble vitamins			BioSystems: REACTOME	2.9e-05	0.0398	0.00166	0.013	6	53	CYP24A1,APOM,GPC5,RBP4,CUBN,LRP2
Pathway	82960	Phenylalanine metabolism			BioSystems: KEGG	3.42e-05	0.0469	0.00174	0.0135	4	17	GLYAT,MAOA,MAOB,HPD
Pathway	M39680	ACE Inhibitor Pathway			MSigDB C2 BIOCARTA (v7.3)	3.42e-05	0.0469	0.00174	0.0135	4	17	NR3C2,KNG1,REN,ACE2
Pathway	MAP00410_beta_Alanine_metabolism	MAP00410 beta Alanine metabolism			GenMAPP	3.42e-05	0.0469	0.00174	0.0135	4	17	GAD1,AOC1,DPYS,EHHADH
Pathway	1270052	Vitamin D (calciferol) metabolism			BioSystems: REACTOME	4.89e-05	0.0671	0.00239	0.0187	3	7	CYP24A1,CUBN,LRP2
Pathway	1383020	PI5P, PP2A and IER3 Regulate PI3K/AKT Signaling			BioSystems: REACTOME	5.87e-05	0.0806	0.00278	0.0217	7	87	ERBB3,ERBB4,KL,PIP5K1B,FGF9,FGFR3,EGF
Pathway	M15394	Acute Myocardial Infarction			MSigDB C2 BIOCARTA (v7.3)	6.77e-05	0.0929	0.0031	0.0242	4	20	FGB,PLG,COL4A3,COL4A4
Pathway	172847	Protein digestion and absorption			BioSystems: KEGG	7.3e-05	0.1	0.00323	0.0252	7	90	MME,COL4A3,COL4A4,SLC3A1,SLC7A9,ACE2,FXYD2
Pathway	M39570	Amino Acid metabolism			MSigDB C2 BIOCARTA (v7.3)	7.83e-05	0.107	0.00325	0.0253	7	91	MAOA,HMGCS2,BHMT,ARG2,EHHADH,ASS1,PCK1
Pathway	PW:0000050	arginine and proline metabolic			Pathway Ontology	8.29e-05	0.114	0.00325	0.0253	4	21	AOC1,MAOB,ARG2,ASS1
Pathway	82964	Tryptophan metabolism			BioSystems: KEGG	8.52e-05	0.117	0.00325	0.0253	5	40	AOC1,MAOA,MAOB,EHHADH,OGDHL
Pathway	82949	Glycine, serine and threonine metabolism			BioSystems: KEGG	8.52e-05	0.117	0.00325	0.0253	5	40	MAOA,MAOB,PIPOX,BHMT,GLDC
Pathway	M980	Tryptophan metabolism			MSigDB C2 BIOCARTA (v7.3)	8.52e-05	0.117	0.00325	0.0253	5	40	AOC1,MAOA,MAOB,EHHADH,OGDHL
Pathway	1268880	Constitutive Signaling by Aberrant PI3K in Cancer			BioSystems: REACTOME	9.34e-05	0.128	0.00346	0.027	6	65	ERBB3,ERBB4,KL,FGF9,FGFR3,EGF
Pathway	1269191	Negative regulation of the PI3K/AKT network			BioSystems: REACTOME	9.62e-05	0.132	0.00348	0.0271	7	94	ERBB3,ERBB4,KL,PIP5K1B,FGF9,FGFR3,EGF
Pathway	M2668	beta-Alanine metabolism			MSigDB C2 BIOCARTA (v7.3)	0.0001	0.138	0.00353	0.0276	4	22	GAD1,UPB1,DPYS,EHHADH
Pathway	M39553	PPAR signaling pathway			MSigDB C2 BIOCARTA (v7.3)	0.000111	0.152	0.0038	0.0296	6	67	ACADL,HMGCS2,FABP1,SLC27A2,EHHADH,PCK1
Pathway	545354	noradrenaline and adrenaline degradation			BioSystems: BIOCYC	0.000115	0.158	0.00386	0.0301	3	9	MAOA,MAOB,ADH6
Pathway	M15997	Intrinsic Prothrombin Activation Pathway			MSigDB C2 BIOCARTA (v7.3)	0.000121	0.165	0.00394	0.0307	4	23	FGB,KNG1,COL4A3,COL4A4
Pathway	1270204	Biogenic amines are oxidatively deaminated to aldehydes by MAOA and MAOB			BioSystems: REACTOME	0.00013	0.178	0.00407	0.0318	2	2	MAOA,MAOB
Pathway	M13088	PPAR signaling pathway			MSigDB C2 BIOCARTA (v7.3)	0.000131	0.179	0.00407	0.0318	6	69	ACADL,HMGCS2,FABP1,SLC27A2,EHHADH,PCK1
Pathway	1270001	Metabolism of lipids and lipoproteins			BioSystems: REACTOME	0.000138	0.189	0.0042	0.0328	22	816	EPHX2,CDS1,ACADL,HMGCS2,FABP1,BHMT,PPARGC1A,ACSM3,ANGPTL3,PIP5K1B,HSD11B2,HSD17B2,NR1H4,SLC27A2,CUBN,SLC44A4,GBA3,SLC10A2,EHHADH,MTTP,CYP4F3,HAO2
Pathway	83042	PPAR signaling pathway			BioSystems: KEGG	0.000166	0.227	0.0049	0.0383	6	72	ACADL,HMGCS2,FABP1,SLC27A2,EHHADH,PCK1
Pathway	MAP00380_Tryptophan_metabolism	MAP00380 Tryptophan metabolism			GenMAPP	0.000168	0.231	0.0049	0.0383	5	46	AOC1,MAOA,MAOB,CYP3A5,EHHADH
Pathway	1269923	Transport of glucose and other sugars, bile salts and organic acids, metal ions and amine compounds			BioSystems: REACTOME	0.000205	0.281	0.00585	0.0456	7	106	SLC13A3,SLC44A4,SLC2A2,SLC13A1,SLC14A1,SLC22A2,SLC22A5
Pathway	83007	Butanoate metabolism			BioSystems: KEGG	0.000267	0.366	0.00746	0.0582	4	28	GAD1,HMGCS2,ACSM3,EHHADH
Pathway	M17726	Drug metabolism - other enzymes			MSigDB C2 BIOCARTA (v7.3)	0.000275	0.377	0.00755	0.0589	5	51	UPB1,CYP3A5,UGT2B28,DPYS,UGT2A3
Pathway	M14171	Starch and sucrose metabolism			MSigDB C2 BIOCARTA (v7.3)	0.000302	0.414	0.00809	0.0631	5	52	UGT2B28,MGAM,GBA3,UGT2A3,G6PC1
Pathway	M40051	RAS and Bradykinin pathways in COVID-19			MSigDB C2 BIOCARTA (v7.3)	0.000307	0.421	0.00809	0.0631	4	29	CYP24A1,KNG1,REN,ACE2
Pathway	1383024	ERBB2 Activates PTK6 Signaling			BioSystems: REACTOME	0.00038	0.521	0.0089	0.0695	3	13	ERBB3,ERBB4,EGF
Pathway	1268827	Potassium transport channels			BioSystems: REACTOME	0.000383	0.525	0.0089	0.0695	2	3	KCNJ1,KCNJ16
Pathway	545364	thymine degradation			BioSystems: BIOCYC	0.000383	0.525	0.0089	0.0695	2	3	UPB1,DPYS
Pathway	142324	dopamine degradation			BioSystems: BIOCYC	0.000383	0.525	0.0089	0.0695	2	3	MAOA,MAOB
Pathway	142159	methionine salvage			BioSystems: BIOCYC	0.000383	0.525	0.0089	0.0695	2	3	BHMT,BHMT2
Pathway	545270	uracil degradation			BioSystems: BIOCYC	0.000383	0.525	0.0089	0.0695	2	3	UPB1,DPYS
Pathway	605866	Pyrimidine degradation, uracil => beta-alanine, thymine => 3-aminoisobutanoate			BioSystems: KEGG	0.000383	0.525	0.0089	0.0695	2	3	UPB1,DPYS
Pathway	M14933	Steroid hormone biosynthesis			MSigDB C2 BIOCARTA (v7.3)	0.000393	0.539	0.00897	0.07	5	55	CYP3A5,UGT2B28,HSD11B2,HSD17B2,UGT2A3
Pathway	82966	beta-Alanine metabolism			BioSystems: KEGG	0.000399	0.547	0.00897	0.07	4	31	GAD1,UPB1,DPYS,EHHADH
Pathway	M6487	Platelet Amyloid Precursor Protein Pathway			MSigDB C2 BIOCARTA (v7.3)	0.000479	0.658	0.0106	0.0827	3	14	PLG,COL4A3,COL4A4
Pathway	82940	Steroid hormone biosynthesis			BioSystems: KEGG	0.000503	0.691	0.011	0.0855	5	58	CYP3A5,UGT2B28,HSD11B2,HSD17B2,UGT2A3
Pathway	M39649	Complement and Coagulation Cascades			MSigDB C2 BIOCARTA (v7.3)	0.000545	0.748	0.0116	0.0907	5	59	CLU,FGB,PLG,KNG1,SERPINA5
Pathway	1268879	PI3K/AKT Signaling in Cancer			BioSystems: REACTOME	0.000558	0.765	0.0116	0.0907	6	90	ERBB3,ERBB4,KL,FGF9,FGFR3,EGF
Pathway	1269188	PIP3 activates AKT signaling			BioSystems: REACTOME	0.000559	0.767	0.0116	0.0907	7	125	ERBB3,ERBB4,KL,PIP5K1B,FGF9,FGFR3,EGF
Pathway	M3397	Butanoate metabolism			MSigDB C2 BIOCARTA (v7.3)	0.000573	0.786	0.0116	0.0909	4	34	GAD1,HMGCS2,ACSM3,EHHADH
Pathway	PW:0000492	renin-angiotensin system signaling			Pathway Ontology	0.000594	0.815	0.0116	0.0909	3	15	MME,REN,ACE2
Pathway	M201	ErbB receptor signaling network			MSigDB C2 BIOCARTA (v7.3)	0.000594	0.815	0.0116	0.0909	3	15	ERBB3,ERBB4,EGF
Pathway	1383023	ERBB2 Regulates Cell Motility			BioSystems: REACTOME	0.000594	0.815	0.0116	0.0909	3	15	ERBB3,ERBB4,EGF
Pathway	1269384	GAB1 signalosome			BioSystems: REACTOME	0.000645	0.884	0.012	0.0935	7	128	ERBB3,ERBB4,KL,PIP5K1B,FGF9,FGFR3,EGF
Pathway	1269473	PI3K/AKT activation			BioSystems: REACTOME	0.000645	0.884	0.012	0.0935	7	128	ERBB3,ERBB4,KL,PIP5K1B,FGF9,FGFR3,EGF
Pathway	PW:0000052	tyrosine metabolic			Pathway Ontology	0.000725	0.995	0.012	0.0935	3	16	AOC1,MAOB,HPD
Pathway	SMP00281	Anistreplase Pathway			SMPDB	0.000725	0.995	0.012	0.0935	3	16	FGB,PLG,KNG1
Pathway	SMP00280	Alteplase Pathway			SMPDB	0.000725	0.995	0.012	0.0935	3	16	FGB,PLG,KNG1
Pathway	SMP00283	Tenecteplase Pathway			SMPDB	0.000725	0.995	0.012	0.0935	3	16	FGB,PLG,KNG1
Pathway	SMP00282	Streptokinase Pathway			SMPDB	0.000725	0.995	0.012	0.0935	3	16	FGB,PLG,KNG1
Pathway	SMP00285	Reteplase Pathway			SMPDB	0.000725	0.995	0.012	0.0935	3	16	FGB,PLG,KNG1
Pathway	SMP00284	Urokinase Pathway			SMPDB	0.000725	0.995	0.012	0.0935	3	16	FGB,PLG,KNG1
Pathway	SMP00287	Tranexamic Acid Pathway			SMPDB	0.000725	0.995	0.012	0.0935	3	16	FGB,PLG,KNG1
Pathway	SMP00286	Aminocaproic Acid Pathway			SMPDB	0.000725	0.995	0.012	0.0935	3	16	FGB,PLG,KNG1
Pathway	SMP00288	Aprotinin Pathway			SMPDB	0.000725	0.995	0.012	0.0935	3	16	FGB,PLG,KNG1
Pathway	1269492	PI3K events in ERBB2 signaling			BioSystems: REACTOME	0.000725	0.995	0.012	0.0935	3	16	ERBB3,ERBB4,EGF
Pathway	PW:0000167	pantothenate and CoA biosynthetic			Pathway Ontology	0.00076	1	0.0123	0.0957	2	4	UPB1,DPYS
Pathway	1270203	Amine Oxidase reactions			BioSystems: REACTOME	0.00076	1	0.0123	0.0957	2	4	MAOA,MAOB
Pathway	130626	Aldosterone-regulated sodium reabsorption			BioSystems: KEGG	0.000794	1	0.0127	0.0989	4	37	KCNJ1,NR3C2,HSD11B2,FXYD2
Pathway	PW:0000641	gluconeogenesis pathway			Pathway Ontology	0.000873	1	0.0129	0.101	3	17	ALDOB,G6PC1,PCK1
Pathway	M17636	Renin-angiotensin system			MSigDB C2 BIOCARTA (v7.3)	0.000873	1	0.0129	0.101	3	17	MME,REN,ACE2
Pathway	SMP00276	Argatroban Pathway			SMPDB	0.000873	1	0.0129	0.101	3	17	FGB,PLG,KNG1
Pathway	SMP00278	Lepirudin Pathway			SMPDB	0.000873	1	0.0129	0.101	3	17	FGB,PLG,KNG1
Pathway	SMP00277	Bivalirudin Pathway			SMPDB	0.000873	1	0.0129	0.101	3	17	FGB,PLG,KNG1
Pathway	SMP00279	Ximelagatran Pathway			SMPDB	0.000873	1	0.0129	0.101	3	17	FGB,PLG,KNG1
Pathway	MAP00150_Androgen_and_estrogen_metabolism	MAP00150 Androgen and estrogen metabolism			GenMAPP	0.000873	1	0.0129	0.101	3	17	ADH6,HSD11B2,HSD17B2
Pathway	1269302	Role of LAT2/NTAL/LAB on calcium mobilization			BioSystems: REACTOME	0.000963	1	0.0133	0.104	7	137	ERBB3,ERBB4,KL,PIP5K1B,FGF9,FGFR3,EGF
Pathway	1270158	Metabolism of amino acids and derivatives			BioSystems: REACTOME	0.000998	1	0.0133	0.104	12	367	HGD,PIPOX,BHMT,TYRP1,HPD,GLDC,BHMT2,DIO1,BBOX1,ARG2,ASS1,AGMAT
Pathway	P04372	5-Hydroxytryptamine degredation			PantherDB	0.00104	1	0.0133	0.104	3	18	MAOA,MAOB,ALDH8A1
Pathway	M39370	TGF-B Signaling in Thyroid Cells for Epithelial-Mesenchymal Transition			MSigDB C2 BIOCARTA (v7.3)	0.00104	1	0.0133	0.104	3	18	CDH1,CDH6,CDH16
Pathway	M16650	Phenylalanine metabolism			MSigDB C2 BIOCARTA (v7.3)	0.00104	1	0.0133	0.104	3	18	MAOA,MAOB,HPD
Pathway	1268749	Metabolism of Angiotensinogen to Angiotensins			BioSystems: REACTOME	0.00104	1	0.0133	0.104	3	18	MME,REN,ACE2
Pathway	SMP00269	Acenocoumarol Pathway			SMPDB	0.00104	1	0.0133	0.104	3	18	FGB,PLG,KNG1
Pathway	SMP00268	Warfarin Pathway			SMPDB	0.00104	1	0.0133	0.104	3	18	FGB,PLG,KNG1
Pathway	SMP00270	Dicumarol Pathway			SMPDB	0.00104	1	0.0133	0.104	3	18	FGB,PLG,KNG1
Pathway	SMP00272	Enoxaparin Pathway			SMPDB	0.00104	1	0.0133	0.104	3	18	FGB,PLG,KNG1
Pathway	SMP00271	Phenprocoumon Pathway			SMPDB	0.00104	1	0.0133	0.104	3	18	FGB,PLG,KNG1
Pathway	SMP00274	Heparin Pathway			SMPDB	0.00104	1	0.0133	0.104	3	18	FGB,PLG,KNG1
Pathway	SMP00273	Fondaparinux Pathway			SMPDB	0.00104	1	0.0133	0.104	3	18	FGB,PLG,KNG1
Pathway	SMP00275	Ardeparin Pathway			SMPDB	0.00104	1	0.0133	0.104	3	18	FGB,PLG,KNG1
Pathway	M39448	Neural Crest Differentiation			MSigDB C2 BIOCARTA (v7.3)	0.00108	1	0.0137	0.107	6	102	FGFR3,TFAP2A,TFAP2B,LHX1,CDH1,CDH6
Pathway	MAP00650_Butanoate_metabolism	MAP00650 Butanoate metabolism			GenMAPP	0.00122	1	0.0149	0.116	3	19	GAD1,HMGCS2,EHHADH
Pathway	M39718	Vitamin D Receptor Pathway			MSigDB C2 BIOCARTA (v7.3)	0.00125	1	0.0149	0.116	8	185	CYP3A5,CYP24A1,S100A2,KL,SULT1C2,HSD17B2,KNG1,SOSTDC1
Pathway	1269928	Sodium-coupled sulphate, di- and tri-carboxylate transporters			BioSystems: REACTOME	0.00126	1	0.0149	0.116	2	5	SLC13A3,SLC13A1
Pathway	142386	tyrosine degradation			BioSystems: BIOCYC	0.00126	1	0.0149	0.116	2	5	HGD,HPD
Pathway	M22018	Neuroregulin receptor degredation protein-1 Controls ErbB3 receptor recycling			MSigDB C2 BIOCARTA (v7.3)	0.00126	1	0.0149	0.116	2	5	ERBB3,EGF
Pathway	522534	Tyrosine degradation, tyrosine => homogentisate			BioSystems: KEGG	0.00126	1	0.0149	0.116	2	5	HGD,HPD
Pathway	M39449	Catalytic cycle of mammalian Flavin-containing MonoOxygenases (FMOs)			MSigDB C2 BIOCARTA (v7.3)	0.00126	1	0.0149	0.116	2	5	FMO1,FMO5
Pathway	PW:0000529	angiotensin (1-7) signaling			Pathway Ontology	0.00126	1	0.0149	0.116	2	5	MME,ACE2
Pathway	M16473	Aldosterone-regulated sodium reabsorption			MSigDB C2 BIOCARTA (v7.3)	0.00129	1	0.0151	0.118	4	42	KCNJ1,NR3C2,HSD11B2,FXYD2
Pathway	M39891	Genes controlling nephrogenesis			MSigDB C2 BIOCARTA (v7.3)	0.00141	1	0.0164	0.128	4	43	NPHS2,NPHS1,LHX1,EMX2
Pathway	MAP00340_Histidine_metabolism	MAP00340 Histidine metabolism			GenMAPP	0.00143	1	0.0165	0.128	3	20	AOC1,MAOA,MAOB
Pathway	M39403	Primary Focal Segmental Glomerulosclerosis FSGS			MSigDB C2 BIOCARTA (v7.3)	0.00153	1	0.017	0.133	5	74	NPHS2,MME,NPHS1,COL4A3,COL4A4
Pathway	137911	FOXA2 and FOXA3 transcription factor networks			BioSystems: Pathway Interaction Database	0.00154	1	0.017	0.133	4	44	ALDOB,SLC2A2,G6PC1,PCK1
Pathway	170720	Carbohydrate digestion and absorption			BioSystems: KEGG	0.00154	1	0.017	0.133	4	44	MGAM,SLC2A2,FXYD2,G6PC1
Pathway	M13720	Lysine degradation			MSigDB C2 BIOCARTA (v7.3)	0.00154	1	0.017	0.133	4	44	PIPOX,BBOX1,EHHADH,OGDHL
Pathway	1269624	Retinoid metabolism and transport			BioSystems: REACTOME	0.00154	1	0.017	0.133	4	44	APOM,GPC5,RBP4,LRP2
Pathway	M39474	Glycolysis and Gluconeogenesis			MSigDB C2 BIOCARTA (v7.3)	0.00167	1	0.0182	0.142	4	45	ALDOB,SLC2A2,G6PC1,PCK1
Pathway	M106	FOXA2 and FOXA3 transcription factor networks			MSigDB C2 BIOCARTA (v7.3)	0.00167	1	0.0182	0.142	4	45	ALDOB,SLC2A2,G6PC1,PCK1
Pathway	MAP00071_Fatty_acid_metabolism	MAP00071 Fatty acid metabolism			GenMAPP	0.00181	1	0.0194	0.152	4	46	ACADL,CYP3A5,ADH6,EHHADH
Pathway	83033	Drug metabolism - other enzymes			BioSystems: KEGG	0.00181	1	0.0194	0.152	4	46	UPB1,UGT2B28,DPYS,UGT2A3
Pathway	545353	serotonin degradation			BioSystems: BIOCYC	0.00187	1	0.0194	0.152	2	6	MAOA,ADH6
Pathway	413351	Urea cycle			BioSystems: KEGG	0.00187	1	0.0194	0.152	2	6	ARG2,ASS1
Pathway	782398	pyrimidine ribonucleosides degradation			BioSystems: BIOCYC	0.00187	1	0.0194	0.152	2	6	UPB1,DPYS
Pathway	MAP00500_Starch_and_sucrose_metabolism	MAP00500 Starch and sucrose metabolism			GenMAPP	0.0019	1	0.0194	0.152	3	22	ADH6,MGAM,G6PC1
Pathway	M39862	FGF23 signalling in Hypophosphatemic rickets and related disorders			MSigDB C2 BIOCARTA (v7.3)	0.0019	1	0.0194	0.152	3	22	CYP24A1,KL,FGFR3
Pathway	1269490	SHC1 events in ERBB2 signaling			BioSystems: REACTOME	0.0019	1	0.0194	0.152	3	22	ERBB3,ERBB4,EGF
Pathway	814926	Carbon metabolism			BioSystems: KEGG	0.00191	1	0.0194	0.152	6	114	GLDC,ALDOB,RGN,EHHADH,OGDHL,HAO2
Pathway	M6391	Peroxisome			MSigDB C2 BIOCARTA (v7.3)	0.00193	1	0.0195	0.152	5	78	EPHX2,PIPOX,SLC27A2,EHHADH,HAO2
Pathway	83073	Complement and coagulation cascades			BioSystems: KEGG	0.00205	1	0.0205	0.16	5	79	CLU,FGB,PLG,KNG1,SERPINA5
Pathway	144182	Proximal tubule bicarbonate reclamation			BioSystems: KEGG	0.00216	1	0.0212	0.165	3	23	SLC4A4,FXYD2,PCK1
Pathway	83075	Renin-angiotensin system			BioSystems: KEGG	0.00216	1	0.0212	0.165	3	23	MME,REN,ACE2
Pathway	M4361	Proximal tubule bicarbonate reclamation			MSigDB C2 BIOCARTA (v7.3)	0.00216	1	0.0212	0.165	3	23	SLC4A4,FXYD2,PCK1
Pathway	82958	Histidine metabolism			BioSystems: KEGG	0.00245	1	0.0239	0.186	3	24	AOC1,MAOA,MAOB
Pathway	131226	Peroxisome			BioSystems: KEGG	0.00254	1	0.0244	0.191	5	83	EPHX2,PIPOX,SLC27A2,EHHADH,HAO2
Pathway	SMP00007	Beta-Alanine Metabolism			SMPDB	0.0026	1	0.0244	0.191	2	7	UPB1,DPYS
Pathway	1269411	FGFR3b ligand binding and activation			BioSystems: REACTOME	0.0026	1	0.0244	0.191	2	7	FGF9,FGFR3
Pathway	M39867	SARS-CoV-2 and Angiotensin-converting enzyme 2 receptor: molecular mechanisms			MSigDB C2 BIOCARTA (v7.3)	0.0026	1	0.0244	0.191	2	7	REN,ACE2
Pathway	M39868	COVID-19, thrombosis and anticoagulation			MSigDB C2 BIOCARTA (v7.3)	0.0026	1	0.0244	0.191	2	7	FGB,PLG
Pathway	SMP00004	Glycine, Serine and Threonine Metabolism			SMPDB	0.00276	1	0.0258	0.201	3	25	MAOA,BHMT,GLDC
Pathway	M39727	One carbon metabolism and related pathways			MSigDB C2 BIOCARTA (v7.3)	0.00328	1	0.0304	0.237	4	54	GAD1,BHMT,BHMT2,GPX3
Pathway	545337	putrescine degradation III			BioSystems: BIOCYC	0.00344	1	0.0314	0.245	2	8	MAOA,MAOB
Pathway	997799	Glucuronate pathway (uronate pathway)			BioSystems: KEGG	0.00346	1	0.0314	0.245	3	27	KL,UGT2B28,UGT2A3
Pathway	82932	Ascorbate and aldarate metabolism			BioSystems: KEGG	0.00346	1	0.0314	0.245	3	27	UGT2B28,RGN,UGT2A3
Pathway	M40054	7-oxo-C and 7beta-HC pathways			MSigDB C2 BIOCARTA (v7.3)	0.00384	1	0.0347	0.27	3	28	EPHX2,HSD11B2,SLC27A2
Pathway	1269478	Signaling by PDGF			BioSystems: REACTOME	0.00405	1	0.0363	0.283	11	379	ERBB3,ERBB4,KL,FGB,PIP5K1B,FGF9,FGFR3,PLG,COL4A3,COL4A4,EGF
Pathway	M12524	Histidine metabolism			MSigDB C2 BIOCARTA (v7.3)	0.00425	1	0.0376	0.293	3	29	AOC1,MAOA,MAOB
Pathway	1270031	Peroxisomal lipid metabolism			BioSystems: REACTOME	0.00425	1	0.0376	0.293	3	29	SLC27A2,EHHADH,HAO2
Pathway	413399	GABA biosynthesis, eukaryotes, putrescine => GABA			BioSystems: KEGG	0.00439	1	0.0384	0.299	2	9	MAOA,MAOB
Pathway	PW:0000053	phenylalanine metabolic			Pathway Ontology	0.00439	1	0.0384	0.299	2	9	AOC1,MAOB
Pathway	82956	Lysine degradation			BioSystems: KEGG	0.00451	1	0.0392	0.306	4	59	PIPOX,BBOX1,EHHADH,OGDHL
Pathway	1270312	NCAM signaling for neurite out-growth			BioSystems: REACTOME	0.00464	1	0.0399	0.311	9	279	ERBB3,ERBB4,KL,FGB,FGF9,FGFR3,COL4A3,COL4A4,EGF
Pathway	M1519	Endocytosis			MSigDB C2 BIOCARTA (v7.3)	0.00465	1	0.0399	0.311	7	181	ERBB3,ERBB4,DNAJC6,PIP5K1B,FGFR3,SH3GL2,EGF
Pathway	1457793	Downregulation of ERBB2 signaling			BioSystems: REACTOME	0.00468	1	0.0399	0.311	3	30	ERBB3,ERBB4,EGF
Pathway	1269392	Downstream signaling of activated FGFR1			BioSystems: REACTOME	0.00514	1	0.0425	0.331	3	31	KL,FGF9,FLRT3
Pathway	138008	a6b1 and a6b4 Integrin signaling			BioSystems: Pathway Interaction Database	0.00514	1	0.0425	0.331	3	31	ERBB3,EGF,CDH1
Pathway	M11521	Glycolysis / Gluconeogenesis			MSigDB C2 BIOCARTA (v7.3)	0.00539	1	0.0425	0.331	4	62	ADH6,ALDOB,G6PC1,PCK1
Pathway	1270233	Cell-cell junction organization			BioSystems: REACTOME	0.00539	1	0.0425	0.331	4	62	CLDN10,CLDN8,CDH1,CDH6
Pathway	1059539	Choline metabolism in cancer			BioSystems: KEGG	0.00542	1	0.0425	0.331	5	99	PIP5K1B,SLC44A4,EGF,SLC22A2,SLC22A5
Pathway	1269913	Multifunctional anion exchangers			BioSystems: REACTOME	0.00545	1	0.0425	0.331	2	10	SLC26A4,SLC5A12
Pathway	1269909	Bicarbonate transporters			BioSystems: REACTOME	0.00545	1	0.0425	0.331	2	10	SLC4A1,SLC4A4
Pathway	1427845	Negative regulation of activity of TFAP2 (AP-2) family transcription factors			BioSystems: REACTOME	0.00545	1	0.0425	0.331	2	10	TFAP2A,TFAP2B
Pathway	1270167	Urea cycle			BioSystems: REACTOME	0.00545	1	0.0425	0.331	2	10	ARG2,ASS1
Pathway	M22040	Regulators of Bone Mineralization			MSigDB C2 BIOCARTA (v7.3)	0.00545	1	0.0425	0.331	2	10	COL4A3,COL4A4
Pathway	P02771	Pyrimidine Metabolism			PantherDB	0.00545	1	0.0425	0.331	2	10	UPB1,DPYS
Pathway	1268778	Neurotransmitter Clearance In The Synaptic Cleft			BioSystems: REACTOME	0.00545	1	0.0425	0.331	2	10	MAOA,SLC22A2
Pathway	PW:0000028	alanine and aspartate metabolic			Pathway Ontology	0.00545	1	0.0425	0.331	2	10	GAD1,ASS1
Pathway	1270226	Abacavir transport and metabolism			BioSystems: REACTOME	0.00545	1	0.0425	0.331	2	10	SLC22A2,PCK1
Pathway	1270016	mitochondrial fatty acid beta-oxidation of saturated fatty acids			BioSystems: REACTOME	0.00545	1	0.0425	0.331	2	10	ACADL,ACSM3
Pathway	835392	superpathway of tryptophan utilization			BioSystems: BIOCYC	0.00562	1	0.0433	0.338	3	32	MAOA,MAOB,ADH6
Pathway	M39476	Constitutive Androstane Receptor Pathway			MSigDB C2 BIOCARTA (v7.3)	0.00562	1	0.0433	0.338	3	32	CYP3A5,PPARGC1A,EHHADH
Pathway	M9488	Retinol metabolism			MSigDB C2 BIOCARTA (v7.3)	0.00603	1	0.0458	0.357	4	64	CYP3A5,ADH6,UGT2B28,UGT2A3
Pathway	83020	Retinol metabolism			BioSystems: KEGG	0.00637	1	0.0458	0.357	4	65	CYP3A5,ADH6,UGT2B28,UGT2A3
Pathway	1269937	Organic cation transport			BioSystems: REACTOME	0.00661	1	0.0458	0.357	2	11	SLC22A2,SLC22A5
Pathway	1270164	Phenylalanine and tyrosine catabolism			BioSystems: REACTOME	0.00661	1	0.0458	0.357	2	11	HGD,HPD
Pathway	413352	Lysine degradation, lysine => saccharopine => acetoacetyl-CoA			BioSystems: KEGG	0.00661	1	0.0458	0.357	2	11	EHHADH,OGDHL
Pathway	SMP00008	Phenylalanine and Tyrosine Metabolism			SMPDB	0.00661	1	0.0458	0.357	2	11	HGD,HPD
Pathway	M15422	Vitamin C in the Brain			MSigDB C2 BIOCARTA (v7.3)	0.00661	1	0.0458	0.357	2	11	COL4A3,COL4A4
Pathway	SMP00146	Captopril Pathway			SMPDB	0.00667	1	0.0458	0.357	3	34	NR3C2,REN,FXYD2
Pathway	SMP00145	Benazepril Pathway			SMPDB	0.00667	1	0.0458	0.357	3	34	NR3C2,REN,FXYD2
Pathway	SMP00148	Enalapril Pathway			SMPDB	0.00667	1	0.0458	0.357	3	34	NR3C2,REN,FXYD2
Pathway	SMP00147	Cilazapril Pathway			SMPDB	0.00667	1	0.0458	0.357	3	34	NR3C2,REN,FXYD2
Pathway	SMP00149	Fosinopril Pathway			SMPDB	0.00667	1	0.0458	0.357	3	34	NR3C2,REN,FXYD2
Pathway	SMP00151	Moexipril Pathway			SMPDB	0.00667	1	0.0458	0.357	3	34	NR3C2,REN,FXYD2
Pathway	SMP00150	Lisinopril Pathway			SMPDB	0.00667	1	0.0458	0.357	3	34	NR3C2,REN,FXYD2
Pathway	SMP00153	Quinapril Pathway			SMPDB	0.00667	1	0.0458	0.357	3	34	NR3C2,REN,FXYD2
Pathway	SMP00152	Perindopril Pathway			SMPDB	0.00667	1	0.0458	0.357	3	34	NR3C2,REN,FXYD2
Pathway	SMP00155	Rescinnamine Pathway			SMPDB	0.00667	1	0.0458	0.357	3	34	NR3C2,REN,FXYD2
Pathway	SMP00154	Ramipril Pathway			SMPDB	0.00667	1	0.0458	0.357	3	34	NR3C2,REN,FXYD2
Pathway	SMP00157	Trandolapril Pathway			SMPDB	0.00667	1	0.0458	0.357	3	34	NR3C2,REN,FXYD2
Pathway	SMP00156	Spirapril Pathway			SMPDB	0.00667	1	0.0458	0.357	3	34	NR3C2,REN,FXYD2
Pathway	82929	Pentose and glucuronate interconversions			BioSystems: KEGG	0.00667	1	0.0458	0.357	3	34	KL,UGT2B28,UGT2A3
Pathway	M39645	Oxidative Stress			MSigDB C2 BIOCARTA (v7.3)	0.00667	1	0.0458	0.357	3	34	MAOA,GPX3,NOX4
Pathway	82926	Glycolysis / Gluconeogenesis			BioSystems: KEGG	0.00709	1	0.0484	0.377	4	67	ADH6,ALDOB,G6PC1,PCK1
Pathway	1270260	Integrin cell surface interactions			BioSystems: REACTOME	0.00746	1	0.0493	0.385	4	68	FGB,COL4A3,COL4A4,CDH1
Pathway	1272486	Insulin resistance			BioSystems: KEGG	0.00749	1	0.0493	0.385	5	107	PPARGC1A,SLC27A2,SLC2A2,G6PC1,PCK1
Pathway	1269185	Downstream signaling events of B Cell Receptor (BCR)			BioSystems: REACTOME	0.00772	1	0.0493	0.385	7	199	ERBB3,ERBB4,KL,PIP5K1B,FGF9,FGFR3,EGF
Pathway	82974	Starch and sucrose metabolism			BioSystems: KEGG	0.00783	1	0.0493	0.385	3	36	MGAM,GBA3,G6PC1
Pathway	M16894	Complement and coagulation cascades			MSigDB C2 BIOCARTA (v7.3)	0.00785	1	0.0493	0.385	4	69	FGB,PLG,KNG1,SERPINA5
Pathway	M2842	Fibrinolysis Pathway			MSigDB C2 BIOCARTA (v7.3)	0.00787	1	0.0493	0.385	2	12	FGB,PLG
Pathway	1268875	Signaling by activated point mutants of FGFR3			BioSystems: REACTOME	0.00787	1	0.0493	0.385	2	12	FGF9,FGFR3
Pathway	1268874	FGFR3 mutant receptor activation			BioSystems: REACTOME	0.00787	1	0.0493	0.385	2	12	FGF9,FGFR3
Pathway	545309	gamma-linolenate biosynthesis			BioSystems: BIOCYC	0.00787	1	0.0493	0.385	2	12	ACSM3,SLC27A2
Pathway	SMP00115	Furosemide Pathway			SMPDB	0.00787	1	0.0493	0.385	2	12	SLC12A1,FXYD2
Pathway	SMP00118	Torsemide Pathway			SMPDB	0.00787	1	0.0493	0.385	2	12	SLC12A1,FXYD2
Pathway	M39331	Alanine and aspartate metabolism			MSigDB C2 BIOCARTA (v7.3)	0.00787	1	0.0493	0.385	2	12	GAD1,ASS1
Pathway	1270141	Pyrimidine catabolism			BioSystems: REACTOME	0.00787	1	0.0493	0.385	2	12	UPB1,DPYS
Pathway	413381	beta-Oxidation			BioSystems: KEGG	0.00787	1	0.0493	0.385	2	12	ACADL,EHHADH
Pathway	PW:0000051	histidine metabolic			Pathway Ontology	0.00787	1	0.0493	0.385	2	12	AOC1,MAOB
Pathway	PW:0000032	pyrimidine metabolic			Pathway Ontology	0.00787	1	0.0493	0.385	2	12	UPB1,DPYS
Pathway	SMP00088	Bumetanide Pathway			SMPDB	0.00787	1	0.0493	0.385	2	12	SLC12A1,FXYD2
Pathway	SMP00097	Ethacrynic Acid pathway			SMPDB	0.00787	1	0.0493	0.385	2	12	SLC12A1,FXYD2
Pubmed	23376485	Proteomic analysis of podocyte exosome-enriched fraction from normal human urine.			Pubmed	3.6e-42	1.13e-37	1.13e-37	1.24e-36	68	1744	EPHX2,GLYAT,HGD,UPB1,AOC1,GIPC2,MAOB,AZGP1,SLC26A4,PDZK1,ACP3,ADGRG1,PBLD,FABP1,BHMT,APOM,ADH6,DEFB1,NPHS2,KL,SULT1C2,CLU,HPD,AFM,PVALB,FGB,UMOD,FGF9,MME,SLC5A12,PLG,ALDOB,BBOX1,PLS1,KNG1,SLC27A2,TRHDE,NPHS1,MGAM,DPYS,CALB1,DSC1,HYAL1,ANXA3,SH3GL2,TOM1L1,GPX3,RBP4,CUBN,SLC44A4,SLC3A1,TSPAN1,CRYAB,FRK,SLC12A1,EGF,PDZK1IP1,ASS1,LRP2,AGMAT,SLC4A4,FXYD2,TACSTD2,CDH1,HAO2,CDH6,SERPINA5,PCK1
Pubmed	19056867	Large-scale proteomics and phosphoproteomics of urinary exosomes.			Pubmed	4.98e-41	1.57e-36	7.84e-37	8.57e-36	55	1016	EPHX2,HGD,UPB1,GIPC2,SLC26A4,PDZK1,ACP3,ALDH8A1,PBLD,FABP1,ADH6,NPHS2,KL,CLIC5,CLU,HPD,BHMT2,UMOD,MME,SLC5A12,BBOX1,PLS1,KNG1,SLC27A2,NPHS1,GPM6A,DPYS,CALB1,NEBL,ANXA3,COBLL1,RBP4,SLC13A3,CUBN,SLC44A4,SLC3A1,TSPAN1,SLC4A1,CRYAB,ACE2,FRK,SLC12A1,EGF,SLCO4C1,SLC15A2,PDZK1IP1,SLC22A2,SLC22A5,ATP6V0A4,ASS1,LRP2,SLC4A4,FXYD2,SERPINA5,PCK1
Pubmed	23533145	In-depth proteomic analyses of exosomes isolated from expressed prostatic secretions in urine.			Pubmed	9.13e-30	2.87e-25	9.58e-26	1.05e-24	46	1070	CHL1,EPHX2,HGD,AOC1,SPINK1,AZGP1,ACP3,ADGRG1,PBLD,FABP1,BHMT,DEFB1,NPHS2,KL,CLU,AFM,BHMT2,FGB,UMOD,MME,PLG,ALDOB,KNG1,TRHDE,MGAM,KRT7,DSC1,HYAL1,ANXA3,TOM1L1,GPX3,RBP4,CUBN,SLC44A4,TSPAN1,CRYAB,ACE2,FRK,SLC12A1,EGF,ASS1,TSPAN8,LRP2,CDH1,SERPINA5,CDH16
Pubmed	19521566	The European renal genome project: an integrated approach towards understanding the genetics of kidney development and disease.			Pubmed	5.2e-19	1.64e-14	4.09e-15	4.47e-14	19	200	PCP4,GAD1,SLC26A4,SLC27A2,NPHS1,SLC13A3,REN,SIM1,CLDN10,CLDN8,SLC2A2,SLC3A1,SLC4A1,ACE2,SLCO4C1,SLC22A2,SLC22A5,LRP2,CDH6
Pubmed	21386911	Identification of anchor genes during kidney development defines ontological relationships, molecular subcompartments and regulatory pathways.			Pubmed	1.77e-14	5.56e-10	1.11e-10	1.22e-09	15	178	SLC17A3,PIPOX,APOM,PRODH2,KCNJ1,UMOD,NR1H4,SLC27A2,GULP1,GPM6A,SLC13A3,SLC3A1,LHX1,SLCO4C1,AGMAT
Pubmed	24816252	An atlas of genetic influences on human blood metabolites.			Pubmed	4.64e-14	1.46e-09	2.44e-10	2.67e-09	15	190	AOC1,ACADL,SLC17A3,CYP3A5,BHMT,ANGPTL3,KNG1,SLC27A2,MGAM,SLC7A9,GBA3,SLC17A1,SLC22A2,SLC22A5,HAO2
Pubmed	23362348	HNF1B controls proximal-intermediate nephron segment identity in vertebrates by regulating Notch signalling components and Irx1/2.			Pubmed	3.52e-13	1.11e-08	1.58e-09	1.73e-08	9	40	NPHS1,CALB1,CUBN,TFAP2B,LHX1,SLC12A1,LRP2,CDH1,CDH6
Pubmed	29449453	Conserved and Divergent Features of Human and Mouse Kidney Organogenesis.			Pubmed	1.21e-12	3.81e-08	4.76e-09	5.21e-08	7	17	NPHS2,UMOD,CALB1,CUBN,SLC12A1,LRP2,CDH1
Pubmed	8125298	Oligo-capping: a simple method to replace the cap structure of eukaryotic mRNAs with oligoribonucleotides.			Pubmed	3.18e-12	1e-07	1.11e-08	1.22e-07	36	1889	GIPC2,MAOA,CYP3A5,ALDH8A1,LRRC2,PLPPR1,ACSM3,CLIC5,TRPM3,KCNJ16,RETREG1,HSD17B2,KNG1,SLC27A2,GALNT14,KRT7,FMO5,COBLL1,TOM1L1,SLC44A4,CLDN8,SLC3A1,SLC7A9,GBA3,RGN,LRRC19,CCDC198,SLC16A4,EHHADH,UGT2A3,TSPAN8,MTTP,AGMAT,OGDHL,C4orf19,CDH16
Pubmed	32179912	Inflammation-like changes in the urothelium of Lifr-deficient mice and LIFR-haploinsufficient humans with urinary tract anomalies.			Pubmed	3.87e-12	1.22e-07	1.22e-08	1.33e-07	8	33	SPINK1,PDZK1,NPHS2,SLC27A2,SOSTDC1,LRP2,CDH1,PCK1
Pubmed	27820600	Direct reprogramming of fibroblasts into renal tubular epithelial cells by defined transcription factors.			Pubmed	5.03e-12	1.59e-07	1.44e-08	1.58e-07	8	34	ESRRG,NR1H4,TFAP2A,TFAP2B,LHX1,SLC17A1,LRP2,EMX2
Pubmed	20424473	L-type voltage-dependent calcium channel alpha subunit 1C is a novel candidate gene associated with secondary hyperparathyroidism: an application of haplotype-based analysis for multiple linked single nucleotide polymorphisms.			Pubmed	8.92e-12	2.81e-07	2.34e-08	2.56e-07	12	144	ADGRG1,KCNJ1,FGF9,NPHS1,CXCL14,SLC2A2,SLC4A1,SLC7A9,SLC12A1,EGF,SLC14A1,SLC15A2
Pubmed	15760467	Searching QTL by gene expression: analysis of diabesity.			Pubmed	2.04e-11	6.43e-07	4.94e-08	5.41e-07	9	61	BHMT,APOM,DIO1,PLG,ALDOB,NR1H4,FMO1,RGN,ASS1
Pubmed	28527294	Activation of Hypoxia Signaling in Stromal Progenitors Impairs Kidney Development.			Pubmed	4.71e-11	1.48e-06	1.06e-07	1.16e-06	8	44	NPHS2,UMOD,NPHS1,COL4A3,CALB1,REN,SLC12A1,LRP2
Pubmed	18554416	Identification of transcripts with enriched expression in the developing and adult pancreas.			Pubmed	9.7e-11	3.05e-06	2.04e-07	2.23e-06	19	575	ACADL,SPINK1,DNAJC6,CA10,APOM,PRODH2,CLU,FGB,RAP1GAP,ANXA3,RBP4,SLC2A2,SLC4A1,PPP1R1A,LHX1,ACE2,CCDC198,ASS1,CDH1
Pubmed	21082674	Comprehensive analysis of low-abundance proteins in human urinary exosomes using peptide ligand library technology, peptide OFFGEL fractionation and nanoHPLC-chip-MS/MS.			Pubmed	1.6e-10	5.04e-06	3.15e-07	3.45e-06	6	17	AOC1,SLC26A4,BHMT,CUBN,SLC12A1,EGF
Pubmed	24952961	A high-resolution spatiotemporal atlas of gene expression of the developing mouse brain.			Pubmed	6.87e-10	2.16e-05	1.21e-06	1.32e-05	32	1851	CHL1,PCP4,GAD1,CDS1,ERBB3,ERBB4,MAOA,MAOB,ESRRG,ADGRG1,CA10,PPARGC1A,CLU,PVALB,TOX3,ANGPTL3,NR3C2,FGFR3,NR1H4,FMO1,CALB1,GPX3,SOSTDC1,SIM1,TFAP2A,TFAP2B,LHX1,EGF,EMX2,CDH1,CDH6,GABRA2
Pubmed	17079272	Grainyhead-related transcription factor is required for duct maturation in the salivary gland and the kidney of the mouse.			Pubmed	6.91e-10	2.18e-05	1.21e-06	1.32e-05	6	21	SLC26A4,UMOD,KRT7,SLC4A1,SLC12A1,FXYD2
Pubmed	23684652	Genetic dissection of sodium and potassium transport along the aldosterone-sensitive distal nephron: importance in the control of blood pressure and hypertension.			Pubmed	1.27e-09	3.99e-05	2.1e-06	2.3e-05	5	11	SLC26A4,KCNJ1,NR3C2,HSD11B2,SLC12A1
Pubmed	23260145	Diabetes risk gene and Wnt effector Tcf7l2/TCF4 controls hepatic response to perinatal and adult metabolic demand.			Pubmed	1.51e-09	4.76e-05	2.38e-06	2.6e-05	7	42	ACADL,HMGCS2,SLC27A2,SLC2A2,EHHADH,G6PC1,PCK1
Pubmed	25313862	Onecut1 and Onecut2 play critical roles in the development of the mouse retina.			Pubmed	2.22e-09	6.98e-05	3.32e-06	3.64e-05	6	25	GAD1,CLU,CALB1,TFAP2A,TFAP2B,LHX1
Pubmed	19000842	Atlas of gene expression in the developing kidney at microanatomic resolution.			Pubmed	6.25e-09	0.000197	8.95e-06	9.79e-05	7	51	PRODH2,CLIC5,UMOD,HYAL1,TFAP2A,SLC12A1,SLCO4C1
Pubmed	33197428	Molecular detection of maturation stages in the developing kidney.			Pubmed	1.17e-08	0.00037	1.54e-05	0.000168	5	16	UMOD,SLC5A12,NPHS1,COL4A3,SLC12A1
Pubmed	24142862	Cdk5 phosphorylation of ErbB4 is required for tangential migration of cortical interneurons.			Pubmed	1.17e-08	0.00037	1.54e-05	0.000168	5	16	GAD1,ERBB3,ERBB4,PVALB,CALB1
Pubmed	20855565	Common genetic variation in multiple metabolic pathways influences susceptibility to low HDL-cholesterol and coronary heart disease.			Pubmed	1.78e-08	0.000561	2.24e-05	0.000245	7	59	PDZK1,TRPM3,CLU,ANGPTL3,NR1H4,CUBN,MTTP
Pubmed	16319116	Identification of multipotent progenitors in the embryonic mouse kidney by a novel colony-forming assay.			Pubmed	2.33e-08	0.000734	2.82e-05	0.000309	6	36	KCNJ1,CUBN,LHX1,SLC12A1,LRP2,CDH1
Pubmed	21521738	p120 catenin is required for normal renal tubulogenesis and glomerulogenesis.			Pubmed	3.09e-08	0.000972	3.47e-05	0.00038	5	19	NPHS2,NPHS1,CALB1,CDH1,CDH6
Pubmed	16049112	FGF8 is required for cell survival at distinct stages of nephrogenesis and for regulation of gene expression in nascent nephrons.			Pubmed	3.09e-08	0.000972	3.47e-05	0.00038	5	19	UMOD,FGFR3,CALB1,LHX1,CDH1
Pubmed	18407958	Monitoring protein-protein interactions between the mammalian integral membrane transporters and PDZ-interacting partners using a modified split-ubiquitin membrane yeast two-hybrid system.			Pubmed	3.28e-08	0.00103	3.56e-05	0.000389	6	38	PDZK1,CRYAB,SLC13A1,PDZK1IP1,ASS1,OGDHL
Pubmed	19343046	Association study between single-nucleotide polymorphisms in 199 drug-related genes and commonly measured quantitative traits of 752 healthy Japanese subjects.			Pubmed	4.94e-08	0.00156	5.19e-05	0.000567	10	193	EPHX2,CYP3A5,CYP24A1,ALDH8A1,ADH6,SULT1C2,SLC15A2,SLC22A2,SLC22A5,CYP4F3
Pubmed	25966682	Tfap2a and 2b act downstream of Ptf1a to promote amacrine cell differentiation during retinogenesis.			Pubmed	8.79e-08	0.00277	8.93e-05	0.000977	5	23	GAD1,CALB1,TFAP2A,TFAP2B,LHX1
Pubmed	23555292	Yap- and Cdc42-dependent nephrogenesis and morphogenesis during mouse kidney development.			Pubmed	1.08e-07	0.00339	9.66e-05	0.00106	6	46	NPHS1,CALB1,SOSTDC1,LHX1,SLC12A1,CDH1
Pubmed	31062503	Foxc2 is essential for podocyte function.			Pubmed	1.11e-07	0.00348	9.66e-05	0.00106	5	24	NPHS2,NPHS1,COL4A3,COL4A4,EMX2
Pubmed	20634891	Maternal genes and facial clefts in offspring: a comprehensive search for genetic associations in two population-based cleft studies from Scandinavia.			Pubmed	1.14e-07	0.00359	9.66e-05	0.00106	12	331	CHL1,GAD1,PIPOX,BHMT,BHMT2,FGF9,FGFR3,HYAL1,TFAP2A,EGF,EMX2,CDH1
Pubmed	18358465	Canonical WNT/beta-catenin signaling is required for ureteric branching.			Pubmed	1.19e-07	0.00375	9.66e-05	0.00106	4	10	CALB1,LHX1,EMX2,CDH1
Pubmed	30046000	Hnf4a deletion in the mouse kidney phenocopies Fanconi renotubular syndrome.			Pubmed	1.19e-07	0.00375	9.66e-05	0.00106	4	10	NPHS2,SLC12A1,ASS1,LRP2
Pubmed	15178647	The developmental regulation of peroxisome proliferator-activated receptor-gamma coactivator-1alpha expression in the liver is partially dissociated from the control of gluconeogenesis and lipid catabolism.			Pubmed	1.19e-07	0.00375	9.66e-05	0.00106	4	10	ACADL,PPARGC1A,G6PC1,PCK1
Pubmed	21209185	Neuregulin 1 promotes excitatory synapse development and function in GABAergic interneurons.			Pubmed	1.2e-07	0.00377	9.66e-05	0.00106	3	3	GAD1,ERBB4,PVALB
Pubmed	32200668	Distinct functions of megalin and cubilin receptors in recovery of normal and nephrotic levels of filtered albumin.			Pubmed	1.2e-07	0.00377	9.66e-05	0.00106	3	3	NPHS2,CUBN,LRP2
Pubmed	15342556	Sequence comparison of human and mouse genes reveals a homologous block structure in the promoter regions.			Pubmed	1.31e-07	0.00413	0.000102	0.00112	23	1293	GLYAT,EXPH5,ESRRG,DNAJC6,FABP1,CLIC5,CLU,HSD17B2,PLS1,RAP1GAP,NOX4,SLC13A3,REN,CUBN,PPP1R1A,SLC7A9,GBA3,SLC16A4,C21orf62,UGT2A3,OGDHL,DIRAS2,C4orf19
Pubmed	22496890	Short-chain 3-hydroxyacyl-coenzyme A dehydrogenase associates with a protein super-complex integrating multiple metabolic pathways.			Pubmed	1.33e-07	0.0042	0.000102	0.00112	8	117	HGD,ACADL,HMGCS2,FABP1,CUBN,ARG2,ASS1,LRP2
Pubmed	22511595	Hnf1b and Pax2 cooperate to control different pathways in kidney and ureter morphogenesis.			Pubmed	1.38e-07	0.00434	0.000103	0.00113	5	25	CALB1,LHX1,SLC12A1,EMX2,CDH16
Pubmed	22999937	Lgr5(+ve) stem/progenitor cells contribute to nephron formation during kidney development.			Pubmed	1.86e-07	0.00586	0.000136	0.00149	4	11	UMOD,CALB1,LRP2,CDH1
Pubmed	24154525	Conserved molecular signatures of neurogenesis in the hippocampal subgranular zone of rodents and primates.			Pubmed	1.95e-07	0.00614	0.00014	0.00153	12	348	GAD1,CDS1,ERBB4,ACADL,ADGRG1,CLU,GLDC,PVALB,MME,CXCL14,CRYAB,SLC14A1
Pubmed	16284245	Fezl regulates the differentiation and axon targeting of layer 5 subcortical projection neurons in cerebral cortex.			Pubmed	2.22e-07	0.007	0.000156	0.0017	8	125	PCP4,GAD1,FGFR3,CALB1,GRB14,SIM1,EMX2,CDH6
Pubmed	19679677	Tissue distribution, ontogeny, and hormonal regulation of xenobiotic transporters in mouse kidneys.			Pubmed	2.78e-07	0.00876	0.000186	0.00204	4	12	SLC10A2,SLCO4C1,SLC15A2,SLC17A1
Pubmed	27633993	Notch signaling promotes nephrogenesis by downregulating Six2.			Pubmed	2.78e-07	0.00876	0.000186	0.00204	4	12	CALB1,LHX1,SLC12A1,CDH1
Pubmed	30127719	Necessity and Sufficiency of Ldb1 in the Generation, Differentiation and Maintenance of Non-photoreceptor Cell Types During Retinal Development.			Pubmed	3.62e-07	0.0114	0.000238	0.0026	5	30	GAD1,CALB1,TFAP2A,TFAP2B,LHX1
Pubmed	24698273	V1 and v2b interneurons secure the alternating flexor-extensor motor activity mice require for limbed locomotion.			Pubmed	4e-07	0.0126	0.000252	0.00276	4	13	GAD1,CALB1,SIM1,SLC17A1
Pubmed	29129523	Higher-Order Kidney Organogenesis from Pluripotent Stem Cells.			Pubmed	4e-07	0.0126	0.000252	0.00276	4	13	CALB1,LHX1,EMX2,CDH1
Pubmed	22967998	Placental PPAR? regulates spatiotemporally diverse genes and a unique metabolic network.			Pubmed	4.49e-07	0.0141	0.000262	0.00287	8	137	CDS1,MAOA,PDZK1,ACP3,PPARGC1A,CLU,HSD11B2,TACSTD2
Pubmed	23631734	Abnormal interneuron development in disrupted-in-schizophrenia-1 L100P mutant mice.			Pubmed	4.75e-07	0.0149	0.000262	0.00287	3	4	GAD1,PVALB,CALB1
Pubmed	28340340	Selective Chemical Inhibition of PGC-1? Gluconeogenic Activity Ameliorates Type 2 Diabetes.			Pubmed	4.75e-07	0.0149	0.000262	0.00287	3	4	PPARGC1A,G6PC1,PCK1
Pubmed	29032953	Abolishment of proximal tubule albumin endocytosis does not affect plasma albumin during nephrotic syndrome in mice.			Pubmed	4.75e-07	0.0149	0.000262	0.00287	3	4	NPHS2,CUBN,LRP2
Pubmed	26711115	Local and Distant Input Controlling Excitation in Layer II of the Medial Entorhinal Cortex.			Pubmed	4.75e-07	0.0149	0.000262	0.00287	3	4	GAD1,PVALB,CALB1
Pubmed	8985169	Long-chain fatty acids suppress the induction of urea cycle enzyme genes by glucocorticoid action.			Pubmed	4.75e-07	0.0149	0.000262	0.00287	3	4	SLC22A5,ASS1,PCK1
Pubmed	17855646	Origin and fate of pendrin-positive intercalated cells in developing mouse kidney.			Pubmed	4.75e-07	0.0149	0.000262	0.00287	3	4	SLC26A4,CALB1,SLC4A1
Pubmed	16498405	Large-scale identification of genes implicated in kidney glomerulus development and function.			Pubmed	5.07e-07	0.016	0.000276	0.00301	5	32	NPHS2,NPHS1,COL4A3,COL4A4,REN
Pubmed	20800603	Investigation of genetic susceptibility factors for human longevity - a targeted nonsynonymous SNP study.			Pubmed	5.63e-07	0.0177	0.0003	0.00328	11	315	ERBB3,NELL1,KL,IL17RB,GALNT14,SLC2A2,SLC3A1,FRK,EGF,LRP2,PCK1
Pubmed	30208054	The Trim family of genes and the retina: Expression and functional characterization.			Pubmed	5.96e-07	0.0188	0.000308	0.00336	5	33	GAD1,CLU,CALB1,TFAP2A,CDH6
Pubmed	23676500	Endothelin-2 deficiency causes growth retardation, hypothermia, and emphysema in mice.			Pubmed	5.96e-07	0.0188	0.000308	0.00336	5	33	HMGCS2,FABP1,SLC2A2,SLC10A2,PCK1
Pubmed	16335952	Human plasma N-glycoproteome analysis by immunoaffinity subtraction, hydrazide chemistry, and mass spectrometry.			Pubmed	7e-07	0.0221	0.000356	0.00389	10	257	CHL1,AZGP1,APOM,CLU,AFM,ANGPTL3,FGB,KNG1,CDH6,SERPINA5
Pubmed	28489004	Analogous mechanism regulating formation of neocortical basal radial glia and cerebellar Bergmann glia.			Pubmed	7.28e-07	0.0229	0.000364	0.00398	6	63	ACADL,CLU,CALB1,SOSTDC1,CRYAB,ASS1
Pubmed	28167773	Intestinal NCoR1, a regulator of epithelial cell maturation, controls neonatal hyperbilirubinemia.			Pubmed	7.58e-07	0.0239	0.000373	0.00408	4	15	FABP1,NOX4,EHHADH,LRP2
Pubmed	19240061	Coeliac disease-associated risk variants in TNFAIP3 and REL implicate altered NF-kappaB signalling.			Pubmed	9.25e-07	0.0291	0.000448	0.0049	10	265	ERBB3,ERBB4,CA10,TYRP1,TRPM3,KCNJ16,COBL,BBOX1,SLC15A2,EHHADH
Pubmed	18082680	Integrin beta1-mediated matrix assembly and signaling are critical for the normal development and function of the kidney glomerulus.			Pubmed	1.01e-06	0.0317	0.000473	0.00518	4	16	NPHS2,NPHS1,COL4A3,COL4A4
Pubmed	20713522	Tbr2-positive intermediate (basal) neuronal progenitors safeguard cerebral cortex expansion by controlling amplification of pallial glutamatergic neurons and attraction of subpallial GABAergic interneurons.			Pubmed	1.01e-06	0.0317	0.000473	0.00518	4	16	GAD1,ERBB4,PVALB,CALB1
Pubmed	23592779	Cubilin, a high affinity receptor for fibroblast growth factor 8, is required for cell survival in the developing vertebrate head.			Pubmed	1.08e-06	0.0339	0.000499	0.00545	5	37	FGFR3,CUBN,TFAP2A,LRP2,EMX2
Pubmed	18647754	Mice lacking the schizophrenia-associated protein FEZ1 manifest hyperactivity and enhanced responsiveness to psychostimulants.			Pubmed	1.18e-06	0.0372	0.000503	0.0055	3	5	GAD1,PVALB,CALB1
Pubmed	15682390	Developmental profile of ErbB receptors in murine central nervous system: implications for functional interactions.			Pubmed	1.18e-06	0.0372	0.000503	0.0055	3	5	GAD1,ERBB3,ERBB4
Pubmed	25587123	Ret is critical for podocyte survival following glomerular injury in vivo.			Pubmed	1.18e-06	0.0372	0.000503	0.0055	3	5	NPHS2,NPHS1,CDH1
Pubmed	15744310	Nutrient control of glucose homeostasis through a complex of PGC-1alpha and SIRT1.			Pubmed	1.18e-06	0.0372	0.000503	0.0055	3	5	PPARGC1A,G6PC1,PCK1
Pubmed	25664690	Exploring the origin and limitations of kidney regeneration.			Pubmed	1.18e-06	0.0372	0.000503	0.0055	3	5	CALB1,SOSTDC1,CDH1
Pubmed	30049711	Neuregulin 3 promotes excitatory synapse formation on hippocampal interneurons.			Pubmed	1.18e-06	0.0372	0.000503	0.0055	3	5	GAD1,ERBB4,PVALB
Pubmed	17205580	The expression pattern of nuclear receptors during cerebellar development.			Pubmed	1.31e-06	0.0413	0.000544	0.00595	4	17	ESRRG,PVALB,NR1H4,CALB1
Pubmed	19641107	Neuronal 3',3,5-triiodothyronine (T3) uptake and behavioral phenotype of mice deficient in Mct8, the neuronal T3 transporter mutated in Allan-Herndon-Dudley syndrome.			Pubmed	1.31e-06	0.0413	0.000544	0.00595	4	17	GAD1,PVALB,CALB1,SLCO4C1
Pubmed	29922981	Requirement of the Mowat-Wilson Syndrome Gene Zeb2 in the Differentiation and Maintenance of Non-photoreceptor Cell Types During Retinal Development.			Pubmed	1.41e-06	0.0444	0.00057	0.00623	5	39	GAD1,CALB1,TFAP2A,TFAP2B,LHX1
Pubmed	22510988	Identification of molecular compartments and genetic circuitry in the developing mammalian kidney.			Pubmed	1.41e-06	0.0444	0.00057	0.00623	5	39	TFAP2B,CLDN8,LHX1,SLC12A1,EMX2
Pubmed	29113990	Notch is required for the formation of all nephron segments and primes nephron progenitors for differentiation.			Pubmed	1.68e-06	0.0529	0.000662	0.00723	4	18	NPHS2,LHX1,SLC12A1,CDH1
Pubmed	27591083	Loss of Zeb2 in mesenchyme-derived nephrons causes primary glomerulocystic disease.			Pubmed	1.68e-06	0.0529	0.000662	0.00723	4	18	NPHS2,NPHS1,CUBN,LRP2
Pubmed	16177003	Ubiquitous and kidney-specific subunits of vacuolar H+-ATPase are differentially expressed during nephrogenesis.			Pubmed	2.12e-06	0.0668	0.000795	0.00869	4	19	SLC26A4,NPHS2,ATP6V0A4,LRP2
Pubmed	29679559	Foxd1 is required for terminal differentiation of anterior hypothalamic neuronal subtypes.			Pubmed	2.12e-06	0.0668	0.000795	0.00869	4	19	GAD1,SIM1,LHX1,EMX2
Pubmed	20410112	Fgfr2 is required for the development of the medial prefrontal cortex and its connections with limbic circuits.			Pubmed	2.12e-06	0.0668	0.000795	0.00869	4	19	GAD1,PVALB,CALB1,CDH6
Pubmed	29474907	Cell-Intrinsic Control of Interneuron Migration Drives Cortical Morphogenesis.			Pubmed	2.12e-06	0.0668	0.000795	0.00869	4	19	GAD1,ERBB4,PVALB,CALB1
Pubmed	11694877	Cardiac malformations, adrenal agenesis, neural crest defects and exencephaly in mice lacking Cited2, a new Tfap2 co-activator.			Pubmed	2.36e-06	0.0742	0.000843	0.00922	3	6	ERBB3,TFAP2A,TFAP2B
Pubmed	30083275	The S100A4 Protein Signals through the ErbB4 Receptor to Promote Neuronal Survival.			Pubmed	2.36e-06	0.0742	0.000843	0.00922	3	6	ERBB3,ERBB4,EGF
Pubmed	21177257	Parkin degrades estrogen-related receptors to limit the expression of monoamine oxidases.			Pubmed	2.36e-06	0.0742	0.000843	0.00922	3	6	MAOA,MAOB,ESRRG
Pubmed	27471003	Activation of farnesoid X receptor promotes triglycerides lowering by suppressing phospholipase A2 G12B expression.			Pubmed	2.36e-06	0.0742	0.000843	0.00922	3	6	PPARGC1A,NR1H4,MTTP
Pubmed	20178365	A proteome-wide perspective on peroxisome targeting signal 1(PTS1)-Pex5p affinities.			Pubmed	2.61e-06	0.0821	0.000913	0.00998	5	44	EPHX2,PIPOX,SLC27A2,EHHADH,HAO2
Pubmed	16498401	In vivo role of the HNF4alpha AF-1 activation domain revealed by exon swapping.			Pubmed	2.61e-06	0.0821	0.000913	0.00998	5	44	HMGCS2,FABP1,MTTP,CDH1,PCK1
Pubmed	20040500	vHNF1 functions in distinct regulatory circuits to control ureteric bud branching and early nephrogenesis.			Pubmed	2.64e-06	0.0831	0.000914	0.00999	4	20	CALB1,LHX1,EMX2,CDH1
Pubmed	19692620	Subtype specification of GABAergic amacrine cells by the orphan nuclear receptor Nr4a2/Nurr1.			Pubmed	3.25e-06	0.102	0.00107	0.0117	4	21	GAD1,CALB1,TFAP2A,LHX1
Pubmed	27385012	Sip1 regulates the generation of the inner nuclear layer retinal cell lineages in mammals.			Pubmed	3.25e-06	0.102	0.00107	0.0117	4	21	GAD1,CALB1,TFAP2A,TFAP2B
Pubmed	23312517	Directed migration of cortical interneurons depends on the cell-autonomous action of Sip1.			Pubmed	3.25e-06	0.102	0.00107	0.0117	4	21	GAD1,ERBB4,PVALB,FLRT3
Pubmed	28760814	A Sall1-NuRD interaction regulates multipotent nephron progenitors and is required for loop of Henle formation.			Pubmed	3.25e-06	0.102	0.00107	0.0117	4	21	UMOD,TFAP2B,LHX1,SLC12A1
Pubmed	19855135	Inactivation of Notch signaling in the renal collecting duct causes nephrogenic diabetes insipidus in mice.			Pubmed	3.25e-06	0.102	0.00107	0.0117	4	21	SLC26A4,CALB1,SLC4A1,SLC12A1
Pubmed	19386638	Dlx1&2 and Mash1 transcription factors control MGE and CGE patterning and differentiation through parallel and overlapping pathways.			Pubmed	3.52e-06	0.111	0.00114	0.0125	7	127	GAD1,ERBB4,ESRRG,NR1H4,SIM1,LHX1,EMX2
Pubmed	14760718	Screening for N-glycosylated proteins by liquid chromatography mass spectrometry.			Pubmed	3.64e-06	0.115	0.00117	0.0128	5	47	AZGP1,CLU,AFM,KNG1,SERPINA5
Pubmed	15167446	Genetic analysis of 22 candidate genes for hypertension in the Japanese population.			Pubmed	3.96e-06	0.125	0.00121	0.0132	4	22	NPHS2,HSD11B2,NPHS1,SLC12A1
Pubmed	29679048	Disruption of Hox9,10,11 function results in cellular level lineage infidelity in the kidney.			Pubmed	4.11e-06	0.129	0.00121	0.0132	3	7	CALB1,SLC12A1,CDH1
Pubmed	15951480	Vitamin D.			Pubmed	4.11e-06	0.129	0.00121	0.0132	3	7	CYP24A1,CUBN,LRP2
Pubmed	7477375	Multiple essential functions of neuregulin in development.			Pubmed	4.11e-06	0.129	0.00121	0.0132	3	7	ERBB3,ERBB4,TFAP2A
Pubmed	32553120	AP-2?/KCTD1 Control Distal Nephron Differentiation and Protect against Renal Fibrosis.			Pubmed	4.11e-06	0.129	0.00121	0.0132	3	7	PVALB,TFAP2B,EGF
Pubmed	17643423	MEGF10 is a mammalian ortholog of CED-1 that interacts with clathrin assembly protein complex 2 medium chain and induces large vacuole formation.			Pubmed	4.11e-06	0.129	0.00121	0.0132	3	7	GULP1,TFAP2A,TFAP2B
Pubmed	17943079	Expression of BMP-7 and USAG-1 (a BMP antagonist) in kidney development and injury.			Pubmed	4.11e-06	0.129	0.00121	0.0132	3	7	UMOD,CALB1,SOSTDC1
Pubmed	32023452	Bookmarking by Non-pioneer Transcription Factors during Liver Development Establishes Competence for Future Gene Activation.			Pubmed	4.11e-06	0.129	0.00121	0.0132	3	7	FABP1,SLC4A1,PCK1
Pubmed	29467543	AP-2? Expression in Developing Retina: Contributing to the Molecular Diversity of Amacrine Cells.			Pubmed	4.11e-06	0.129	0.00121	0.0132	3	7	GAD1,TFAP2A,TFAP2B
Pubmed	23362349	Hepatocyte nuclear factor 1? controls nephron tubular development.			Pubmed	4.77e-06	0.15	0.00139	0.0152	4	23	PVALB,LHX1,SLC12A1,CDH6
Pubmed	18660489	Multiple genetic variants along candidate pathways influence plasma high-density lipoprotein cholesterol concentrations.			Pubmed	4.8e-06	0.151	0.00139	0.0152	9	250	ACADL,HMGCS2,FABP1,PPARGC1A,ACSM3,NR1H4,EHHADH,G6PC1,PCK1
Pubmed	17036046	Six2 is required for suppression of nephrogenesis and progenitor renewal in the developing kidney.			Pubmed	5.7e-06	0.18	0.00162	0.0177	4	24	LHX1,SLC12A1,CDH1,CDH6
Pubmed	21305474	Sox17-dependent gene expression and early heart and gut development in Sox17-deficient mouse embryos.			Pubmed	5.7e-06	0.18	0.00162	0.0177	4	24	FGB,SLC2A2,CRYAB,SLCO4C1
Pubmed	24993945	A crucial role for polysialic acid in developmental interneuron migration and the establishment of interneuron densities in the mouse prefrontal cortex.			Pubmed	6.55e-06	0.206	0.00175	0.0191	3	8	GAD1,PVALB,CALB1
Pubmed	28988771	EGFR Ligands Differentially Stabilize Receptor Dimers to Specify Signaling Kinetics.			Pubmed	6.55e-06	0.206	0.00175	0.0191	3	8	ERBB3,ERBB4,EGF
Pubmed	19716087	Genetic variation in angiotensin-converting enzyme-related pathways associated with sudden cardiac arrest risk.			Pubmed	6.55e-06	0.206	0.00175	0.0191	3	8	KNG1,REN,ACE2
Pubmed	22248045	Meningeal defects alter the tangential migration of cortical interneurons in Foxc1hith/hith mice.			Pubmed	6.55e-06	0.206	0.00175	0.0191	3	8	GAD1,PVALB,CALB1
Pubmed	25857663	The recently identified modifier of murine metastable epialleles, Rearranged L-Myc Fusion, is involved in maintaining epigenetic marks at CpG island shores and enhancers.			Pubmed	6.55e-06	0.206	0.00175	0.0191	3	8	UPB1,HPD,MGAM
Pubmed	12424224	NEPH1 defines a novel family of podocin interacting proteins.			Pubmed	6.55e-06	0.206	0.00175	0.0191	3	8	PDZK1,NPHS2,NPHS1
Pubmed	27631554	Timed Inhibition of Orexin System by Suvorexant Improved Sleep and Glucose Metabolism in Type 2 Diabetic db/db Mice.			Pubmed	6.55e-06	0.206	0.00175	0.0191	3	8	PPARGC1A,G6PC1,PCK1
Pubmed	12467588	Gamma protocadherins are required for survival of spinal interneurons.			Pubmed	6.76e-06	0.213	0.00177	0.0194	4	25	GAD1,PVALB,CALB1,LHX1
Pubmed	17683524	A systematic screen for genes expressed in definitive endoderm by Serial Analysis of Gene Expression (SAGE).			Pubmed	6.76e-06	0.213	0.00177	0.0194	4	25	SPINK1,CUBN,LGALS2,CCDC198
Pubmed	22008794	Integrated microarray and ChIP analysis identifies multiple Foxa2 dependent target genes in the notochord.			Pubmed	7.69e-06	0.242	0.00193	0.0212	7	143	CHL1,SPINK1,CLU,BHMT2,KRT7,SOSTDC1,CDH1
Pubmed	19692168	Genetic susceptibility to distinct bladder cancer subphenotypes.			Pubmed	9.3e-06	0.293	0.00193	0.0212	11	422	EPHX2,MAOA,CYP24A1,BHMT,DIO1,HSD17B2,NR1H4,GPX3,EGF,CDH1,HAO2
Pubmed	19474326	Role of neuroepithelial Sonic hedgehog in hypothalamic patterning.			Pubmed	9.31e-06	0.293	0.00193	0.0212	4	27	CALB1,SIM1,LHX1,EMX2
Pubmed	19037081	Cortical interneurons require p35/Cdk5 for their migration and laminar organization.			Pubmed	9.79e-06	0.308	0.00193	0.0212	3	9	GAD1,PVALB,CALB1
Pubmed	16226707	Radial glia cells are candidate stem cells of ependymoma.			Pubmed	9.79e-06	0.308	0.00193	0.0212	3	9	PCP4,PPP1R1A,EMX2
Pubmed	10655590	Defects in pathfinding by cranial neural crest cells in mice lacking the neuregulin receptor ErbB4.			Pubmed	9.79e-06	0.308	0.00193	0.0212	3	9	ERBB3,ERBB4,TFAP2A
Pubmed	15479642	Ankyrin-based subcellular gradient of neurofascin, an immunoglobulin family protein, directs GABAergic innervation at purkinje axon initial segment.			Pubmed	9.79e-06	0.308	0.00193	0.0212	3	9	GAD1,PVALB,CALB1
Pubmed	18083160	Dynamic expression of Lrp2 pathway members reveals progressive epithelial differentiation of primitive endoderm in mouse blastocyst.			Pubmed	9.79e-06	0.308	0.00193	0.0212	3	9	CUBN,LRP2,CDH1
Pubmed	16807322	Layer acquisition by cortical GABAergic interneurons is independent of Reelin signaling.			Pubmed	9.79e-06	0.308	0.00193	0.0212	3	9	GAD1,PVALB,CALB1
Pubmed	25124681	The miR-379/miR-410 cluster at the imprinted Dlk1-Dio3 domain controls neonatal metabolic adaptation.			Pubmed	1.08e-05	0.341	0.00193	0.0212	4	28	ESRRG,HMGCS2,FABP1,DIO1
Pubmed	24491816	The c-Ski family member and transcriptional regulator Corl2/Skor2 promotes early differentiation of cerebellar Purkinje cells.			Pubmed	1.08e-05	0.341	0.00193	0.0212	4	28	PCP4,GAD1,CALB1,LHX1
Pubmed	20392955	Dlx5 and Dlx6 regulate the development of parvalbumin-expressing cortical interneurons.			Pubmed	1.08e-05	0.341	0.00193	0.0212	4	28	GAD1,ERBB4,PVALB,CALB1
Pubmed	23595746	LHX2 is necessary for the maintenance of optic identity and for the progression of optic morphogenesis.			Pubmed	1.08e-05	0.341	0.00193	0.0212	4	28	SIM1,TFAP2A,LHX1,EMX2
Pubmed	20453000	A Large-scale genetic association study of esophageal adenocarcinoma risk.			Pubmed	1.11e-05	0.35	0.00193	0.0212	10	351	CYP3A5,CYP24A1,BHMT,PPARGC1A,SULT1C2,HSD17B2,IL17RB,SLC10A2,EGF,CDH1
Pubmed	19578796	Association of genetic variants with chronic kidney disease in individuals with different lipid profiles.			Pubmed	1.15e-05	0.361	0.00193	0.0212	7	152	EPHX2,SPINK1,PPARGC1A,ACSM3,FGB,LGALS2,PCK1
Pubmed	25467980	NPAS1 represses the generation of specific subtypes of cortical interneurons.			Pubmed	1.25e-05	0.394	0.00193	0.0212	4	29	GAD1,ERBB4,PVALB,FGFR3
Pubmed	17192421	Involvement of the myelin-associated inhibitor Nogo-A in early cortical development and neuronal maturation.			Pubmed	1.39e-05	0.439	0.00193	0.0212	3	10	GAD1,PVALB,CALB1
Pubmed	9731539	Sensory ataxia and muscle spindle agenesis in mice lacking the transcription factor Egr3.			Pubmed	1.39e-05	0.439	0.00193	0.0212	3	10	PVALB,COL4A3,COL4A4
Pubmed	19298847	In situ hybridization reveals developmental regulation of ErbB1-4 mRNA expression in mouse midbrain: implication of ErbB receptors for dopaminergic neurons.			Pubmed	1.39e-05	0.439	0.00193	0.0212	3	10	ERBB3,ERBB4,PVALB
Pubmed	8702723	The epidermal growth factor receptor couples transforming growth factor-alpha, heparin-binding epidermal growth factor-like factor, and amphiregulin to Neu, ErbB-3, and ErbB-4.			Pubmed	1.39e-05	0.439	0.00193	0.0212	3	10	ERBB3,ERBB4,EGF
Pubmed	21289056	Role of smooth muscle protein SM22? in glomerular epithelial cell injury.			Pubmed	1.39e-05	0.439	0.00193	0.0212	3	10	NPHS2,NPHS1,CDH1
Pubmed	30280653	Blood-Brain Barrier: From Physiology to Disease and Back.			Pubmed	1.45e-05	0.457	0.00193	0.0212	6	105	SLC13A3,SLC15A2,SLC22A2,SLC22A5,LRP2,SLC4A4
Pubmed	28245920	Spatiotemporal Analysis of a Glycolytic Activity Gradient Linked to Mouse Embryo Mesoderm Development.			Pubmed	1.53e-05	0.482	0.00193	0.0212	6	106	ALDOB,MGAM,SLC2A2,OGDHL,G6PC1,PCK1
Pubmed	26243870	Yap and Taz are required for Ret-dependent urinary tract morphogenesis.			Pubmed	1.64e-05	0.517	0.00193	0.0212	4	31	RNF128,CALB1,CDH1,CDH16
Pubmed	17328885	Prospective isolation and global gene expression analysis of definitive and visceral endoderm.			Pubmed	1.64e-05	0.517	0.00193	0.0212	4	31	SPINK1,KRT7,SH3GL2,CLDN8
Pubmed	16502470	Human colostrum: identification of minor proteins in the aqueous phase by proteomics.			Pubmed	1.73e-05	0.546	0.00193	0.0212	7	162	AZGP1,CLU,AFM,FGB,PLG,KNG1,EGF
Pubmed	32424153	TFEB regulates murine liver cell fate during development and regeneration.			Pubmed	1.91e-05	0.601	0.00193	0.0212	3	11	ALDOB,KRT7,PCK1
Pubmed	21592321	Zac1 plays a key role in the development of specific neuronal subsets in the mouse cerebellum.			Pubmed	1.91e-05	0.601	0.00193	0.0212	3	11	GAD1,PVALB,CALB1
Pubmed	20739404	The thyroid hormone receptor alpha1 protein is expressed in embryonic postmitotic neurons and persists in most adult neurons.			Pubmed	1.91e-05	0.601	0.00193	0.0212	3	11	PVALB,DIO1,CALB1
Pubmed	16216236	Lim 1 is required for nephric duct extension and ureteric bud morphogenesis.			Pubmed	1.91e-05	0.601	0.00193	0.0212	3	11	LHX1,EMX2,CDH1
Pubmed	12642503	Lack of pendrin expression leads to deafness and expansion of the endolymphatic compartment in inner ears of Foxi1 null mutant mice.			Pubmed	1.91e-05	0.601	0.00193	0.0212	3	11	ERBB3,SLC26A4,CDH1
Pubmed	12872126	Emx2 patterns the neocortex by regulating FGF positional signaling.			Pubmed	1.91e-05	0.601	0.00193	0.0212	3	11	FGFR3,EMX2,CDH6
Pubmed	24027281	Endothelial VEGF sculpts cortical cytoarchitecture.			Pubmed	1.91e-05	0.601	0.00193	0.0212	3	11	CHL1,GAD1,CALB1
Pubmed	10821760	Impaired migration and delayed differentiation of pancreatic islet cells in mice lacking EGF-receptors.			Pubmed	1.91e-05	0.601	0.00193	0.0212	3	11	ERBB3,ERBB4,CDH1
Pubmed	19890391	Common polymorphisms influencing serum uric acid levels contribute to susceptibility to gout, but not to coronary artery disease.			Pubmed	1.91e-05	0.601	0.00193	0.0212	3	11	SLC17A3,PDZK1,SLC17A1
Pubmed	20486282	Genetic variants in the renin-angiotensin-aldosterone system and salt sensitivity of blood pressure.			Pubmed	1.91e-05	0.601	0.00193	0.0212	3	11	NR3C2,HSD11B2,REN
Pubmed	25834049	Hoxb8 intersection defines a role for Lmx1b in excitatory dorsal horn neuron development, spinofugal connectivity, and nociception.			Pubmed	1.91e-05	0.601	0.00193	0.0212	3	11	GAD1,CALB1,LHX1
Pubmed	9742148	Regional and cellular patterns of reelin mRNA expression in the forebrain of the developing and adult mouse.			Pubmed	1.91e-05	0.601	0.00193	0.0212	3	11	GAD1,PVALB,CALB1
Pubmed	19898482	Genetic variants in TPMT and COMT are associated with hearing loss in children receiving cisplatin chemotherapy.			Pubmed	1.97e-05	0.619	0.00193	0.0212	5	66	SULT1C2,UGT2B28,FMO1,FMO5,SLC15A2
Pubmed	20679960	Pharmacogenetic analysis of lipid responses to rosuvastatin in Chinese patients.			Pubmed	1.97e-05	0.619	0.00193	0.0212	5	66	CYP3A5,PPARGC1A,ACSM3,ANGPTL3,SLC22A2
Pubmed	16971476	A dynamic expression survey identifies transcription factors relevant in mouse digestive tract development.			Pubmed	1.99e-05	0.627	0.00193	0.0212	6	111	EPHX2,ESRRG,NR3C2,NR1H4,CUBN,SLC2A2
Pubmed	26949938	Polo-Like Kinase 3 Appears Dispensable for Normal Retinal Development Despite Robust Embryonic Expression.			Pubmed	2.12e-05	0.668	0.00193	0.0212	4	33	GAD1,CALB1,TFAP2A,TFAP2B
Pubmed	18676680	Pathway-based evaluation of 380 candidate genes and lung cancer susceptibility suggests the importance of the cell cycle pathway.			Pubmed	2.25e-05	0.707	0.00193	0.0212	10	381	EPHX2,MAOA,CYP24A1,BHMT,DIO1,HSD17B2,NR1H4,GPX3,EGF,CDH1
Pubmed	16919269	A global genomic transcriptional code associated with CNS-expressed genes.			Pubmed	2.28e-05	0.717	0.00193	0.0212	9	304	ESRRG,DPYS,GRB14,CXCL14,NLGN1,TFAP2A,TFAP2B,CLDN10,LHX1
Pubmed	19170196	Polymorphisms in innate immunity genes and lung cancer risk in Xuanwei, China.			Pubmed	2.35e-05	0.739	0.00193	0.0212	10	383	EPHX2,MAOA,CYP24A1,BHMT,DIO1,HSD17B2,NR1H4,GPX3,EGF,CDH1
Pubmed	23293290	Lrp4 and Wise interplay controls the formation and patterning of mammary and other skin appendage placodes by modulating Wnt signaling.			Pubmed	2.39e-05	0.754	0.00193	0.0212	4	34	ERBB3,ERBB4,SOSTDC1,CDH1
Pubmed	19657584	Negative emotionality: monoamine oxidase B gene variants modulate personality traits in healthy humans.			Pubmed	2.45e-05	0.77	0.00193	0.0212	2	2	MAOA,MAOB
Pubmed	31768862	Urinary podocyte mRNA is a potent biomarker of anti-neutrophil cytoplasmic antibody-associated glomerulonephritis.			Pubmed	2.45e-05	0.77	0.00193	0.0212	2	2	NPHS2,NPHS1
Pubmed	23858446	Cognitive abnormalities and hippocampal alterations in monoamine oxidase A and B knockout mice.			Pubmed	2.45e-05	0.77	0.00193	0.0212	2	2	MAOA,MAOB
Pubmed	21075085	Up-regulation of the isoenzymes MAO-A and MAO-B in the human basal ganglia and pons in Huntington's disease revealed by quantitative enzyme radioautography.			Pubmed	2.45e-05	0.77	0.00193	0.0212	2	2	MAOA,MAOB
Pubmed	12761213	Human kininogen gene is transactivated by the farnesoid X receptor.			Pubmed	2.45e-05	0.77	0.00193	0.0212	2	2	KNG1,NR1H4
Pubmed	21359973	Transcriptional regulation and multiple functions of MAO genes.			Pubmed	2.45e-05	0.77	0.00193	0.0212	2	2	MAOA,MAOB
Pubmed	17356845	3-Hydroxyglutaric acid is transported via the sodium-dependent dicarboxylate transporter NaDC3.			Pubmed	2.45e-05	0.77	0.00193	0.0212	2	2	SLC13A3,SLC22A2
Pubmed	23978537	Expression and immunolocalisation of the endocytic receptors megalin and cubilin in the human yolk sac and placenta across gestation.			Pubmed	2.45e-05	0.77	0.00193	0.0212	2	2	CUBN,LRP2
Pubmed	7987396	Identification of mutations in the alpha 3(IV) and alpha 4(IV) collagen genes in autosomal recessive Alport syndrome.			Pubmed	2.45e-05	0.77	0.00193	0.0212	2	2	COL4A3,COL4A4
Pubmed	26183901	Distinction in the immunoreactivities of two calcium-binding proteins and neuronal birthdates in the first and higher-order somatosensory thalamic nuclei of mice: Evolutionary implications.			Pubmed	2.45e-05	0.77	0.00193	0.0212	2	2	PVALB,CALB1
Pubmed	10741426	Specific expression of the LIM/homeodomain protein Lim-1 in horizontal cells during retinogenesis.			Pubmed	2.45e-05	0.77	0.00193	0.0212	2	2	CALB1,LHX1
Pubmed	25929810	The prognostic impact of lipid biosynthesis-associated markers, HSD17B2 and HMGCS2, in rectal cancer treated with neoadjuvant concurrent chemoradiotherapy.			Pubmed	2.45e-05	0.77	0.00193	0.0212	2	2	HMGCS2,HSD17B2
Pubmed	15635077	New insights into cystinuria: 40 new mutations, genotype-phenotype correlation, and digenic inheritance causing partial phenotype.			Pubmed	2.45e-05	0.77	0.00193	0.0212	2	2	SLC3A1,SLC7A9
Pubmed	11861643	Analysis of conserved active site residues in monoamine oxidase A and B and their three-dimensional molecular modeling.			Pubmed	2.45e-05	0.77	0.00193	0.0212	2	2	MAOA,MAOB
Pubmed	16358225	Co-localization and interaction of b0,+-type amino acid transporter 1 (BAT1) with caveolin-1 in rat kidney.			Pubmed	2.45e-05	0.77	0.00193	0.0212	2	2	SLC3A1,SLC7A9
Pubmed	3931905	Enzymes of uracil catabolism in normal and neoplastic human tissues.			Pubmed	2.45e-05	0.77	0.00193	0.0212	2	2	UPB1,DPYS
Pubmed	22437417	Acute endotoxemia in mice induces downregulation of megalin and cubilin in the kidney.			Pubmed	2.45e-05	0.77	0.00193	0.0212	2	2	CUBN,LRP2
Pubmed	22850464	Monoamine oxidase A and A/B knockout mice display autistic-like features.			Pubmed	2.45e-05	0.77	0.00193	0.0212	2	2	MAOA,MAOB
Pubmed	17427196	Monoamine oxidase A gene polymorphism predicts adolescent outcome of attention-deficit/hyperactivity disorder.			Pubmed	2.45e-05	0.77	0.00193	0.0212	2	2	MAOA,MAOB
Pubmed	9428707	High-molecular-mass and low-molecular-mass kininogens block plasmin-induced platelet aggregation by forming a complex with kringle 5 of plasminogen/plasmin.			Pubmed	2.45e-05	0.77	0.00193	0.0212	2	2	PLG,KNG1
Pubmed	18092818	Comparison of the structural properties of the active site cavities of human and rat monoamine oxidase A and B in their soluble and membrane-bound forms.			Pubmed	2.45e-05	0.77	0.00193	0.0212	2	2	MAOA,MAOB
Pubmed	20589923	Association study between antipsychotic-induced restless legs syndrome and polymorphisms of monoamine oxidase genes in schizophrenia.			Pubmed	2.45e-05	0.77	0.00193	0.0212	2	2	MAOA,MAOB
Pubmed	24474819	Hepatic Mttp deletion reverses gallstone susceptibility in L-Fabp knockout mice.			Pubmed	2.45e-05	0.77	0.00193	0.0212	2	2	FABP1,MTTP
Pubmed	23339695	CD10 and E-cad expression in urinary bladder urothelial and squamous cell carcinoma.			Pubmed	2.45e-05	0.77	0.00193	0.0212	2	2	MME,CDH1
Pubmed	12716955	Calbindin in cerebellar Purkinje cells is a critical determinant of the precision of motor coordination.			Pubmed	2.45e-05	0.77	0.00193	0.0212	2	2	PVALB,CALB1
Pubmed	21697081	Monoamine oxidase a expression is vital for embryonic brain development by modulating developmental apoptosis.			Pubmed	2.45e-05	0.77	0.00193	0.0212	2	2	MAOA,MAOB
Pubmed	19481955	The upgraded role of HER3 and HER4 receptors in breast cancer.			Pubmed	2.45e-05	0.77	0.00193	0.0212	2	2	ERBB3,ERBB4
Pubmed	32117963	Parvalbumin Interneuron Activation-Dependent Adult Hippocampal Neurogenesis Is Required for Treadmill Running to Reverse Schizophrenia-Like Phenotypes.			Pubmed	2.45e-05	0.77	0.00193	0.0212	2	2	ERBB4,PVALB
Pubmed	25339750	PGC-1? provides a transcriptional framework for synchronous neurotransmitter release from parvalbumin-positive interneurons.			Pubmed	2.45e-05	0.77	0.00193	0.0212	2	2	PPARGC1A,PVALB
Pubmed	25229338	Rare hereditary COL4A3/COL4A4 variants may be mistaken for familial focal segmental glomerulosclerosis.			Pubmed	2.45e-05	0.77	0.00193	0.0212	2	2	COL4A3,COL4A4
Pubmed	9461128	Identification and partial characterization of PDZK1: a novel protein containing PDZ interaction domains.			Pubmed	2.45e-05	0.77	0.00193	0.0212	2	2	PDZK1,PDZK1IP1
Pubmed	19782624	Large rearrangements detected by MLPA, point mutations, and survey of the frequency of mutations within the SLC3A1 and SLC7A9 genes in a cohort of 172 cystinuric Italian patients.			Pubmed	2.45e-05	0.77	0.00193	0.0212	2	2	SLC3A1,SLC7A9
Pubmed	11834493	Increased baroreceptor response in mice deficient in monoamine oxidase A and B.			Pubmed	2.45e-05	0.77	0.00193	0.0212	2	2	MAOA,MAOB
Pubmed	9367891	EGF inhibits expression of WDNM1 and sulfated glycoprotein-2 genes in mammary epithelial cells.			Pubmed	2.45e-05	0.77	0.00193	0.0212	2	2	CLU,EGF
Pubmed	22565185	A spectrum of novel NPHS1 and NPHS2 gene mutations in pediatric nephrotic syndrome patients from Pakistan.			Pubmed	2.45e-05	0.77	0.00193	0.0212	2	2	NPHS2,NPHS1
Pubmed	9546356	Tubular up-regulation of clusterin mRNA in murine lupus-like nephritis.			Pubmed	2.45e-05	0.77	0.00193	0.0212	2	2	CLU,LRP2
Pubmed	3387449	cDNA cloning of human liver monoamine oxidase A and B: molecular basis of differences in enzymatic properties.			Pubmed	2.45e-05	0.77	0.00193	0.0212	2	2	MAOA,MAOB
Pubmed	8316221	Site-directed mutagenesis of monoamine oxidase A and B: role of cysteines.			Pubmed	2.45e-05	0.77	0.00193	0.0212	2	2	MAOA,MAOB
Pubmed	24337247	Nephrin and Podocin functions are highly conserved between the zebrafish pronephros and mammalian metanephros.			Pubmed	2.45e-05	0.77	0.00193	0.0212	2	2	NPHS2,NPHS1
Pubmed	26051160	Association between monoamine oxidase gene polymorphisms and smoking behavior: A meta-analysis.			Pubmed	2.45e-05	0.77	0.00193	0.0212	2	2	MAOA,MAOB
Pubmed	26254096	Prognostic significance of serum ERBB3 and ERBB4 mRNA in lung adenocarcinoma patients.			Pubmed	2.45e-05	0.77	0.00193	0.0212	2	2	ERBB3,ERBB4
Pubmed	1432104	Promoter organization and activity of human monoamine oxidase (MAO) A and B genes.			Pubmed	2.45e-05	0.77	0.00193	0.0212	2	2	MAOA,MAOB
Pubmed	30982971	Tspan8 is expressed in breast cancer and regulates E-cadherin/catenin signalling and metastasis accompanied by increased circulating extracellular vesicles.			Pubmed	2.45e-05	0.77	0.00193	0.0212	2	2	TSPAN8,CDH1
Pubmed	12234283	Cystinuria in children: distribution and frequencies of mutations in the SLC3A1 and SLC7A9 genes.			Pubmed	2.45e-05	0.77	0.00193	0.0212	2	2	SLC3A1,SLC7A9
Pubmed	10799513	Differential influence of the 4F2 heavy chain and the protein related to b(0,+) amino acid transport on substrate affinity of the heteromeric b(0,+) amino acid transporter.			Pubmed	2.45e-05	0.77	0.00193	0.0212	2	2	SLC3A1,SLC7A9
Pubmed	25964309	Clinical and genetic analysis of patients with cystinuria in the United Kingdom.			Pubmed	2.45e-05	0.77	0.00193	0.0212	2	2	SLC3A1,SLC7A9
Pubmed	9750160	Ontogeny of the murine glucose-6-phosphatase system.			Pubmed	2.45e-05	0.77	0.00193	0.0212	2	2	G6PC1,PCK1
Pubmed	15694196	Monoamine oxidases A and B gene polymorphisms in migraine patients.			Pubmed	2.45e-05	0.77	0.00193	0.0212	2	2	MAOA,MAOB
Pubmed	17848580	NKCC2 surface expression in mammalian cells: down-regulation by novel interaction with aldolase B.			Pubmed	2.45e-05	0.77	0.00193	0.0212	2	2	ALDOB,SLC12A1
Pubmed	12777388	Structural comparison of human monoamine oxidases A and B: mass spectrometry monitoring of cysteine reactivities.			Pubmed	2.45e-05	0.77	0.00193	0.0212	2	2	MAOA,MAOB
Pubmed	14991253	The population-specific distribution and frequencies of genomic variants in the SLC3A1 and SLC7A9 genes and their application in molecular genetic testing of cystinuria.			Pubmed	2.45e-05	0.77	0.00193	0.0212	2	2	SLC3A1,SLC7A9
Pubmed	28812535	Associating mutations causing cystinuria with disease severity with the aim of providing precision medicine.			Pubmed	2.45e-05	0.77	0.00193	0.0212	2	2	SLC3A1,SLC7A9
Pubmed	11761322	Substrates but not inhibitors alter the redox potentials of monoamine oxidases.			Pubmed	2.45e-05	0.77	0.00193	0.0212	2	2	MAOA,MAOB
Pubmed	17275105	Differences in locomotor behavior revealed in mice deficient for the calcium-binding proteins parvalbumin, calbindin D-28k or both.			Pubmed	2.45e-05	0.77	0.00193	0.0212	2	2	PVALB,CALB1
Pubmed	12136060	Evidence for a genetic association between monoamine oxidase A and restless legs syndrome.			Pubmed	2.45e-05	0.77	0.00193	0.0212	2	2	MAOA,MAOB
Pubmed	30610956	Nox4 and soluble epoxide hydrolase synergistically mediate homocysteine-induced inflammation in vascular smooth muscle cells.			Pubmed	2.45e-05	0.77	0.00193	0.0212	2	2	EPHX2,NOX4
Pubmed	12028435	COL4A3/COL4A4 mutations: from familial hematuria to autosomal-dominant or recessive Alport syndrome.			Pubmed	2.45e-05	0.77	0.00193	0.0212	2	2	COL4A3,COL4A4
Pubmed	14633121	Characterization of assembly of recombinant type IV collagen alpha3, alpha4, and alpha5 chains in transfected cell strains.			Pubmed	2.45e-05	0.77	0.00193	0.0212	2	2	COL4A3,COL4A4
Pubmed	11043382	Molecular cloning and expression of a novel klotho-related protein.			Pubmed	2.45e-05	0.77	0.00193	0.0212	2	2	KL,GBA3
Pubmed	15616221	Expression and role of cubilin in the internalization of nutrients during the peri-implantation development of the rodent embryo.			Pubmed	2.45e-05	0.77	0.00193	0.0212	2	2	CUBN,LRP2
Pubmed	29050386	Brain monoamine oxidase B and A in human parkinsonian dopamine deficiency disorders.			Pubmed	2.45e-05	0.77	0.00193	0.0212	2	2	MAOA,MAOB
Pubmed	30920112	Noncoding variations in Cyp24a1 gene are associated with Klotho-mediated aging phenotypes in different strains of mice.			Pubmed	2.45e-05	0.77	0.00193	0.0212	2	2	CYP24A1,KL
Pubmed	19349416	Regulation of renal outer medullary potassium channel and renal K(+) excretion by Klotho.			Pubmed	2.45e-05	0.77	0.00193	0.0212	2	2	KL,KCNJ1
Pubmed	18182100	Cytogenetic analysis of HER1/EGFR, HER2, HER3 and HER4 in 278 breast cancer patients.			Pubmed	2.45e-05	0.77	0.00193	0.0212	2	2	ERBB3,ERBB4
Pubmed	7969716	Differential age-related changes of MAO-A and MAO-B in mouse brain and peripheral organs.			Pubmed	2.45e-05	0.77	0.00193	0.0212	2	2	MAOA,MAOB
Pubmed	14697881	The FAD binding sites of human monoamine oxidases A and B.			Pubmed	2.45e-05	0.77	0.00193	0.0212	2	2	MAOA,MAOB
Pubmed	23671160	Paired-pulse facilitation at recurrent Purkinje neuron synapses is independent of calbindin and parvalbumin during high-frequency activation.			Pubmed	2.45e-05	0.77	0.00193	0.0212	2	2	PVALB,CALB1
Pubmed	16860487	Deficiency in parvalbumin, but not in calbindin D-28k upregulates mitochondrial volume and decreases smooth endoplasmic reticulum surface selectively in a peripheral, subplasmalemmal region in the soma of Purkinje cells.			Pubmed	2.45e-05	0.77	0.00193	0.0212	2	2	PVALB,CALB1
Pubmed	17885758	Which genotype of MAO gene that the patients have are likely to be most susceptible to the symptoms of fibromyalgia?			Pubmed	2.45e-05	0.77	0.00193	0.0212	2	2	MAOA,MAOB
Pubmed	21978760	Association study of monoamine oxidase A/B genes and schizophrenia in Han Chinese.			Pubmed	2.45e-05	0.77	0.00193	0.0212	2	2	MAOA,MAOB
Pubmed	28577058	Type B and A monoamine oxidase and their inhibitors regulate the gene expression of Bcl-2 and neurotrophic factors in human glioblastoma U118MG cells: different signal pathways for neuroprotection by selegiline and rasagiline.			Pubmed	2.45e-05	0.77	0.00193	0.0212	2	2	MAOA,MAOB
Pubmed	27536774	HER3, but Not HER4, Plays an Essential Role in the Clinicopathology and Prognosis of Gastric Cancer: A Meta-Analysis.			Pubmed	2.45e-05	0.77	0.00193	0.0212	2	2	ERBB3,ERBB4
Pubmed	12813159	Mutational analysis of dendritic Ca2+ kinetics in rodent Purkinje cells: role of parvalbumin and calbindin D28k.			Pubmed	2.45e-05	0.77	0.00193	0.0212	2	2	PVALB,CALB1
Pubmed	26067610	Urinary ACE2 is associated with urinary L-FABP and albuminuria in patients with chronic kidney disease.			Pubmed	2.45e-05	0.77	0.00193	0.0212	2	2	FABP1,ACE2
Pubmed	12754212	Identification of small PDZK1-associated protein, DD96/MAP17, as a regulator of PDZK1 and plasma high density lipoprotein levels.			Pubmed	2.45e-05	0.77	0.00193	0.0212	2	2	PDZK1,PDZK1IP1
Pubmed	23673647	Clusterin and LRP2 are critical components of the hypothalamic feeding regulatory pathway.			Pubmed	2.45e-05	0.77	0.00193	0.0212	2	2	CLU,LRP2
Pubmed	24045899	Synergistic mutations in SLC3A1 and SLC7A9 leading to heterogeneous cystinuria phenotypes: pitfalls in the diagnostic workup.			Pubmed	2.45e-05	0.77	0.00193	0.0212	2	2	SLC3A1,SLC7A9
Pubmed	19614771	Immunophenotypic features of MELF pattern invasion in endometrial adenocarcinoma: evidence for epithelial-mesenchymal transition.			Pubmed	2.45e-05	0.77	0.00193	0.0212	2	2	KRT7,CDH1
Pubmed	28185955	Endothelial Nox4-based NADPH oxidase regulates atherosclerosis via soluble epoxide hydrolase.			Pubmed	2.45e-05	0.77	0.00193	0.0212	2	2	EPHX2,NOX4
Pubmed	2023912	Human monoamine oxidase A and B genes exhibit identical exon-intron organization.			Pubmed	2.45e-05	0.77	0.00193	0.0212	2	2	MAOA,MAOB
Pubmed	24275833	GAD67 deficiency in parvalbumin interneurons produces deficits in inhibitory transmission and network disinhibition in mouse prefrontal cortex.			Pubmed	2.45e-05	0.77	0.00193	0.0212	2	2	GAD1,PVALB
Pubmed	14729567	Peroxisome proliferator-activated receptor-gamma coactivator 1alpha (PGC-1alpha) regulates triglyceride metabolism by activation of the nuclear receptor FXR.			Pubmed	2.45e-05	0.77	0.00193	0.0212	2	2	PPARGC1A,NR1H4
Pubmed	28858992	The genotypes and methylation of MAO genes as factors behind smoking behavior.			Pubmed	2.45e-05	0.77	0.00193	0.0212	2	2	MAOA,MAOB
Pubmed	28651026	Binding of human plasminogen and high-molecular-mass kininogen by cell surface-exposed proteins of Candida parapsilosis.			Pubmed	2.45e-05	0.77	0.00193	0.0212	2	2	PLG,KNG1
Pubmed	28689648	Clinical and genetic characterization of Chinese pediatric cystine stone patients.			Pubmed	2.45e-05	0.77	0.00193	0.0212	2	2	SLC3A1,SLC7A9
Pubmed	31400925	HER3 and HER4 are highly expressed in human meningiomas.			Pubmed	2.45e-05	0.77	0.00193	0.0212	2	2	ERBB3,ERBB4
Pubmed	18216719	Genetic regulation of beta-ureidopropionase and its possible implication in altered uracil catabolism.			Pubmed	2.45e-05	0.77	0.00193	0.0212	2	2	UPB1,DPYS
Pubmed	20485326	Deletion of MAOA and MAOB in a male patient causes severe developmental delay, intermittent hypotonia and stereotypical hand movements.			Pubmed	2.45e-05	0.77	0.00193	0.0212	2	2	MAOA,MAOB
Pubmed	12563176	Monoamine oxidase polymorphisms and smoking behaviour in Japanese.			Pubmed	2.45e-05	0.77	0.00193	0.0212	2	2	MAOA,MAOB
Pubmed	30809547	Selectivity of Dietary Phenolics for Inhibition of Human Monoamine Oxidases A and B.			Pubmed	2.45e-05	0.77	0.00193	0.0212	2	2	MAOA,MAOB
Pubmed	12768082	Type-IV collagen related diseases.			Pubmed	2.45e-05	0.77	0.00193	0.0212	2	2	COL4A3,COL4A4
Pubmed	14507670	A human-mouse chimera of the alpha3alpha4alpha5(IV) collagen protomer rescues the renal phenotype in Col4a3-/- Alport mice.			Pubmed	2.45e-05	0.77	0.00193	0.0212	2	2	COL4A3,COL4A4
Pubmed	9334227	Characterization of an epithelial approximately 460-kDa protein that facilitates endocytosis of intrinsic factor-vitamin B12 and binds receptor-associated protein.			Pubmed	2.45e-05	0.77	0.00193	0.0212	2	2	CUBN,LRP2
Pubmed	25610371	Cerebellar transcriptional alterations with Purkinje cell dysfunction and loss in mice lacking PGC-1?.			Pubmed	2.45e-05	0.77	0.00193	0.0212	2	2	PPARGC1A,PVALB
Pubmed	27984181	AP-2? and AP-2? regulate dorsal interneuron specification in the spinal cord.			Pubmed	2.45e-05	0.77	0.00193	0.0212	2	2	TFAP2A,TFAP2B
Pubmed	26540609	Molecular and Clinical Investigation of Cystinuria in the Greek-Cypriot Population.			Pubmed	2.45e-05	0.77	0.00193	0.0212	2	2	SLC3A1,SLC7A9
Pubmed	7792085	Distribution of the calcium binding proteins, calbindin D-28K and parvalbumin, in the subicular complex of the adult mouse.			Pubmed	2.45e-05	0.77	0.00193	0.0212	2	2	PVALB,CALB1
Pubmed	17942953	COL4A3/COL4A4 mutations producing focal segmental glomerulosclerosis and renal failure in thin basement membrane nephropathy.			Pubmed	2.45e-05	0.77	0.00193	0.0212	2	2	COL4A3,COL4A4
Pubmed	25671411	Influence of the environment on the oxidative deamination of p-substituted benzylamines in monoamine oxidase.			Pubmed	2.45e-05	0.77	0.00193	0.0212	2	2	MAOA,MAOB
Pubmed	20029656	Polymorphisms in COL4A3 and COL4A4 genes associated with keratoconus.			Pubmed	2.45e-05	0.77	0.00193	0.0212	2	2	COL4A3,COL4A4
Pubmed	18448595	Silencing megalin and cubilin genes inhibits myeloma light chain endocytosis and ameliorates toxicity in human renal proximal tubule epithelial cells.			Pubmed	2.45e-05	0.77	0.00193	0.0212	2	2	CUBN,LRP2
Pubmed	26792617	Urinary Kininogen-1 and Retinol binding protein-4 respond to Acute Kidney Injury: predictors of patient prognosis?			Pubmed	2.45e-05	0.77	0.00193	0.0212	2	2	KNG1,RBP4
Pubmed	26851573	Monoamine oxidase and agitation in psychiatric patients.			Pubmed	2.45e-05	0.77	0.00193	0.0212	2	2	MAOA,MAOB
Pubmed	20546336	Stromal CD10 expression and relationship to the E-cadherin/beta-catenin complex in breast carcinoma.			Pubmed	2.45e-05	0.77	0.00193	0.0212	2	2	MME,CDH1
Pubmed	11481337	Lipoprotein secretion and triglyceride stores in the heart.			Pubmed	2.45e-05	0.77	0.00193	0.0212	2	2	ACADL,MTTP
Pubmed	25599733	Association between NPHS1 and NPHS2 gene variants and nephrotic syndrome in children.			Pubmed	2.45e-05	0.77	0.00193	0.0212	2	2	NPHS2,NPHS1
Pubmed	12820697	Mutation analysis of SLC7A9 in cystinuria patients in Sweden.			Pubmed	2.45e-05	0.77	0.00193	0.0212	2	2	SLC3A1,SLC7A9
Pubmed	30146843	Clinical, Biochemical, and Genetic Findings of Cystinuria in Chinese Children.			Pubmed	2.45e-05	0.77	0.00193	0.0212	2	2	SLC3A1,SLC7A9
Pubmed	12239244	Comparison between SLC3A1 and SLC7A9 cystinuria patients and carriers: a need for a new classification.			Pubmed	2.45e-05	0.77	0.00193	0.0212	2	2	SLC3A1,SLC7A9
Pubmed	10083729	A novel therapeutic trial of homogentisic aciduria in a murine model of alkaptonuria.			Pubmed	2.45e-05	0.77	0.00193	0.0212	2	2	HGD,HPD
Pubmed	32817565	Structural basis for amino acid exchange by a human heteromeric amino acid transporter.			Pubmed	2.45e-05	0.77	0.00193	0.0212	2	2	SLC3A1,SLC7A9
Pubmed	20607706	AP2 transcription factor induces apoptosis in retinoblastoma cells.			Pubmed	2.45e-05	0.77	0.00193	0.0212	2	2	TFAP2A,TFAP2B
Pubmed	14962671	Association of variations in monoamine oxidases A and B with Parkinson's disease subgroups.			Pubmed	2.45e-05	0.77	0.00193	0.0212	2	2	MAOA,MAOB
Pubmed	26138234	Co-Inheritance of Functional Podocin Variants with Heterozygous Collagen IV Mutations Predisposes to Renal Failure.			Pubmed	2.45e-05	0.77	0.00193	0.0212	2	2	NPHS2,COL4A3
Pubmed	29637670	Monoamine Oxidase Deficiency Causes Prostate Atrophy and Reduces Prostate Progenitor Cell Activity.			Pubmed	2.45e-05	0.77	0.00193	0.0212	2	2	MAOA,MAOB
Pubmed	25083577	Polymorphism analysis of COL4A3 and COL4A4 genes in Greek patients with keratoconus.			Pubmed	2.45e-05	0.77	0.00193	0.0212	2	2	COL4A3,COL4A4
Pubmed	20847057	Identification of the NC1 domain of {alpha}3 chain as critical for {alpha}3{alpha}4{alpha}5 type IV collagen network assembly.			Pubmed	2.45e-05	0.77	0.00193	0.0212	2	2	COL4A3,COL4A4
Pubmed	21081491	Tamm-Horsfall glycoprotein interacts with renal outer medullary potassium channel ROMK2 and regulates its function.			Pubmed	2.45e-05	0.77	0.00193	0.0212	2	2	KCNJ1,UMOD
Pubmed	15942677	Direct effect of plasma permeability factors from patients with idiopatic FSGS on nephrin and podocin expression in human podocytes.			Pubmed	2.45e-05	0.77	0.00193	0.0212	2	2	NPHS2,NPHS1
Pubmed	12015312	Chenodeoxycholic acid and deoxycholic acid inhibit 11 beta-hydroxysteroid dehydrogenase type 2 and cause cortisol-induced transcriptional activation of the mineralocorticoid receptor.			Pubmed	2.45e-05	0.77	0.00193	0.0212	2	2	NR3C2,HSD11B2
Pubmed	18752446	Twenty-four novel mutations identified in a cohort of 85 patients by direct sequencing of the SLC3A1 and SLC7A9 cystinuria genes.			Pubmed	2.45e-05	0.77	0.00193	0.0212	2	2	SLC3A1,SLC7A9
Pubmed	29715367	Conditional Deletion of AP-2? and AP-2? in the Developing Murine Retina Leads to Altered Amacrine Cell Mosaics and Disrupted Visual Function.			Pubmed	2.45e-05	0.77	0.00193	0.0212	2	2	TFAP2A,TFAP2B
Pubmed	21971001	Behavioral outcomes of monoamine oxidase deficiency: preclinical and clinical evidence.			Pubmed	2.45e-05	0.77	0.00193	0.0212	2	2	MAOA,MAOB
Pubmed	21971000	Structural properties of human monoamine oxidases A and B.			Pubmed	2.45e-05	0.77	0.00193	0.0212	2	2	MAOA,MAOB
Pubmed	20633534	Angiopoietin-like protein 3 regulates the motility and permeability of podocytes by altering nephrin expression in vitro.			Pubmed	2.45e-05	0.77	0.00193	0.0212	2	2	ANGPTL3,NPHS1
Pubmed	17681450	Dynamic patterns of colocalization of calbindin, parvalbumin and GABA in subpopulations of mouse basolateral amygdalar cells during development.			Pubmed	2.45e-05	0.77	0.00193	0.0212	2	2	PVALB,CALB1
Pubmed	29561187	Increased urinary angiotensin converting enzyme 2 and neprilysin in patients with type 2 diabetes.			Pubmed	2.45e-05	0.77	0.00193	0.0212	2	2	MME,ACE2
Pubmed	24522496	A mouse Col4a4 mutation causing Alport glomerulosclerosis with abnormal collagen ?3?4?5(IV) trimers.			Pubmed	2.45e-05	0.77	0.00193	0.0212	2	2	COL4A3,COL4A4
Pubmed	9537506	Two genes, COL4A3 and COL4A4 coding for the human alpha3(IV) and alpha4(IV) collagen chains are arranged head-to-head on chromosome 2q36.			Pubmed	2.45e-05	0.77	0.00193	0.0212	2	2	COL4A3,COL4A4
Pubmed	28938454	11?-HSD2 SUMOylation Modulates Cortisol-Induced Mineralocorticoid Receptor Nuclear Translocation Independently of Effects on Transactivation.			Pubmed	2.45e-05	0.77	0.00193	0.0212	2	2	NR3C2,HSD11B2
Pubmed	7962065	Collagen IV alpha 3, alpha 4, and alpha 5 chains in rodent basal laminae: sequence, distribution, association with laminins, and developmental switches.			Pubmed	2.45e-05	0.77	0.00193	0.0212	2	2	COL4A3,COL4A4
Pubmed	18778962	An overview of SLC3A1 and SLC7A9 mutations in Greek cystinuria patients.			Pubmed	2.45e-05	0.77	0.00193	0.0212	2	2	SLC3A1,SLC7A9
Pubmed	29742505	The COL4A3 and COL4A4 Digenic Mutations in cis Result in Benign Familial Hematuria in a Large Chinese Family.			Pubmed	2.45e-05	0.77	0.00193	0.0212	2	2	COL4A3,COL4A4
Pubmed	26745281	Quantitative Phosphoproteomics Analysis of ERBB3/ERBB4 Signaling.			Pubmed	2.45e-05	0.77	0.00193	0.0212	2	2	ERBB3,ERBB4
Pubmed	18791690	Megalin and cubilin in the human gallbladder epithelium.			Pubmed	2.45e-05	0.77	0.00193	0.0212	2	2	CUBN,LRP2
Pubmed	20826315	Response features of parvalbumin-expressing interneurons suggest precise roles for subtypes of inhibition in visual cortex.			Pubmed	2.45e-05	0.77	0.00193	0.0212	2	2	GAD1,PVALB
Pubmed	18343407	alpha B-crystallin is a cytoplasmic interaction partner of the kidney-specific cadherin-16.			Pubmed	2.45e-05	0.77	0.00193	0.0212	2	2	CRYAB,CDH16
Pubmed	28249676	Murine recombinant angiotensin-converting enzyme 2 attenuates kidney injury in experimental Alport syndrome.			Pubmed	2.45e-05	0.77	0.00193	0.0212	2	2	COL4A3,ACE2
Pubmed	11318953	Human cystinuria-related transporter: localization and functional characterization.			Pubmed	2.45e-05	0.77	0.00193	0.0212	2	2	SLC3A1,SLC7A9
Pubmed	14531788	Significant contribution of genomic rearrangements in SLC3A1 and SLC7A9 to the etiology of cystinuria.			Pubmed	2.45e-05	0.77	0.00193	0.0212	2	2	SLC3A1,SLC7A9
Pubmed	25409434	Uromodulin retention in thick ascending limb of Henle's loop affects SCD1 in neighboring proximal tubule: renal transcriptome studies in mouse models of uromodulin-associated kidney disease.			Pubmed	2.45e-05	0.77	0.00193	0.0212	2	2	UMOD,SLC12A1
Pubmed	11994745	Megalin and cubilin: multifunctional endocytic receptors.			Pubmed	2.45e-05	0.77	0.00193	0.0212	2	2	CUBN,LRP2
Pubmed	10766831	Megalin acts in concert with cubilin to mediate endocytosis of high density lipoproteins.			Pubmed	2.45e-05	0.77	0.00193	0.0212	2	2	CUBN,LRP2
Pubmed	16950764	Coordinate transcriptional repression of liver fatty acid-binding protein and microsomal triglyceride transfer protein blocks hepatic very low density lipoprotein secretion without hepatosteatosis.			Pubmed	2.45e-05	0.77	0.00193	0.0212	2	2	FABP1,MTTP
Pubmed	18005331	The role of parvalbumin and calbindin D28k in experimental scrapie.			Pubmed	2.45e-05	0.77	0.00193	0.0212	2	2	PVALB,CALB1
Pubmed	11595644	Cubilin and megalin expression and their interaction in the rat intestine: effect of thyroidectomy.			Pubmed	2.45e-05	0.77	0.00193	0.0212	2	2	CUBN,LRP2
Pubmed	32873097	Tissue distribution, hormonal regulation, ontogeny, diurnal expression, and induction of mouse cystine transporters Slc3a1 and Slc7a9.			Pubmed	2.45e-05	0.77	0.00193	0.0212	2	2	SLC3A1,SLC7A9
Pubmed	31623375	Mechanism of Dyslipidemia in Obesity-Unique Regulation of Ileal Villus Cell Brush Border Membrane Sodium-Bile Acid Cotransport.			Pubmed	2.45e-05	0.77	0.00193	0.0212	2	2	NR1H4,SLC10A2
Pubmed	17211152	NPHS1 and NPHS2 gene mutations in Chinese children with sporadic nephrotic syndrome.			Pubmed	2.45e-05	0.77	0.00193	0.0212	2	2	NPHS2,NPHS1
Pubmed	24121512	A substrate access tunnel in the cytosolic domain is not an essential feature of the solute carrier 4 (SLC4) family of bicarbonate transporters.			Pubmed	2.45e-05	0.77	0.00193	0.0212	2	2	SLC4A1,SLC4A4
Pubmed	33212830	Selective Interactions of			Pubmed	2.45e-05	0.77	0.00193	0.0212	2	2	MAOA,MAOB
Pubmed	27770636	Two novel loci, COBL and SLC10A2, for Alzheimer's disease in African Americans.			Pubmed	2.45e-05	0.77	0.00193	0.0212	2	2	COBL,SLC10A2
Pubmed	28646536	Spectrum of mutations in cystinuria patients presenting with prenatal hyperechoic colon.			Pubmed	2.45e-05	0.77	0.00193	0.0212	2	2	SLC3A1,SLC7A9
Pubmed	30498032	Genetic recovery of ErbB4 in adulthood partially restores brain functions in null mice.			Pubmed	2.45e-05	0.77	0.00193	0.0212	2	2	GAD1,ERBB4
Pubmed	24052634	COL4A3/COL4A4 mutations and features in individuals with autosomal recessive Alport syndrome.			Pubmed	2.45e-05	0.77	0.00193	0.0212	2	2	COL4A3,COL4A4
Pubmed	19357112	Clinico-pathological correlations in 127 patients in 11 large pedigrees, segregating one of three heterozygous mutations in the COL4A3/ COL4A4 genes associated with familial haematuria and significant late progression to proteinuria and chronic kidney disease from focal segmental glomerulosclerosis.			Pubmed	2.45e-05	0.77	0.00193	0.0212	2	2	COL4A3,COL4A4
Pubmed	19923254	An integrative genomic analysis identifies Bhmt2 as a diet-dependent genetic factor protecting against acetaminophen-induced liver toxicity.			Pubmed	2.45e-05	0.77	0.00193	0.0212	2	2	BHMT2,G6PC1
Pubmed	17044053	Family-based case-control study of MAOA and MAOB polymorphisms in Parkinson disease.			Pubmed	2.45e-05	0.77	0.00193	0.0212	2	2	MAOA,MAOB
Pubmed	16115209	Mono- and dual-frequency fast cerebellar oscillation in mice lacking parvalbumin and/or calbindin D-28k.			Pubmed	2.45e-05	0.77	0.00193	0.0212	2	2	PVALB,CALB1
Pubmed	16129825	Three-dimensional structure of human monoamine oxidase A (MAO A): relation to the structures of rat MAO A and human MAO B.			Pubmed	2.45e-05	0.77	0.00193	0.0212	2	2	MAOA,MAOB
Pubmed	16235097	Persistent familial hematuria in children and the locus for thin basement membrane nephropathy.			Pubmed	2.45e-05	0.77	0.00193	0.0212	2	2	COL4A3,COL4A4
Pubmed	15272015	A spontaneous point mutation produces monoamine oxidase A/B knock-out mice with greatly elevated monoamines and anxiety-like behavior.			Pubmed	2.45e-05	0.77	0.00193	0.0212	2	2	MAOA,MAOB
Pubmed	18563384	Sequence variation between the mouse and human glucose-6-phosphatase catalytic subunit gene promoters results in differential activation by peroxisome proliferator activated receptor gamma coactivator-1alpha.			Pubmed	2.45e-05	0.77	0.00193	0.0212	2	2	PPARGC1A,G6PC1
Pubmed	29970987	Shank2 Deletion in Parvalbumin Neurons Leads to Moderate Hyperactivity, Enhanced Self-Grooming and Suppressed Seizure Susceptibility in Mice.			Pubmed	2.45e-05	0.77	0.00193	0.0212	2	2	PVALB,SHANK2
Pubmed	10762324	Alterations in Purkinje cell spines of calbindin D-28 k and parvalbumin knock-out mice.			Pubmed	2.45e-05	0.77	0.00193	0.0212	2	2	PVALB,CALB1
Pubmed	26123750	Mutation analysis of SLC3A1 and SLC7A9 genes in patients with cystinuria.			Pubmed	2.45e-05	0.77	0.00193	0.0212	2	2	SLC3A1,SLC7A9
Pubmed	27544825	Enhancing inhibitory synaptic function reverses spatial memory deficits in Shank2 mutant mice.			Pubmed	2.45e-05	0.77	0.00193	0.0212	2	2	SHANK2,GABRA2
Pubmed	25389533	The influence of monoamine oxidase variants on the risk of betel quid-associated oral and pharyngeal cancer.			Pubmed	2.45e-05	0.77	0.00193	0.0212	2	2	MAOA,MAOB
Pubmed	19406966	Clinical features and long-term outcome of nephrotic syndrome associated with heterozygous NPHS1 and NPHS2 mutations.			Pubmed	2.45e-05	0.77	0.00193	0.0212	2	2	NPHS2,NPHS1
Pubmed	22049338	Disorder-to-order transition underlies the structural basis for the assembly of a transcriptionally active PGC-1?/ERR? complex.			Pubmed	2.45e-05	0.77	0.00193	0.0212	2	2	ESRRG,PPARGC1A
Pubmed	21478284	Podocyte main slit diaphragm proteins, nephrin and podocin, are affected at early stages of lupus nephritis and correlate with disease histology.			Pubmed	2.45e-05	0.77	0.00193	0.0212	2	2	NPHS2,NPHS1
Pubmed	17969526	[Expression and significance of ErbB3 and ErbB4 in patients with laryngeal squamous cell carcinomas].			Pubmed	2.45e-05	0.77	0.00193	0.0212	2	2	ERBB3,ERBB4
Pubmed	18457970	Human betaine-homocysteine methyltransferase (BHMT) and BHMT2: common gene sequence variation and functional characterization.			Pubmed	2.45e-05	0.77	0.00193	0.0212	2	2	BHMT,BHMT2
Pubmed	8148485	Urinary protein C inhibitor binding region in the B beta-chain of human fibrinogen.			Pubmed	2.45e-05	0.77	0.00193	0.0212	2	2	FGB,SERPINA5
Pubmed	15563565	Ren1c homozygous null mice are hypotensive and polyuric, but heterozygotes are indistinguishable from wild-type.			Pubmed	2.45e-05	0.77	0.00193	0.0212	2	2	REN,SLC12A1
Pubmed	16546142	Parvalbumin and calbindin D-28k immunoreactivity in transgenic mice with a G93A mutant SOD1 gene.			Pubmed	2.45e-05	0.77	0.00193	0.0212	2	2	PVALB,CALB1
Pubmed	18661361	COL4A3/COL4A4 mutations link familial hematuria and focal segmental glomerulosclerosis. glomerular epithelium destruction via basement membrane thinning?			Pubmed	2.45e-05	0.77	0.00193	0.0212	2	2	COL4A3,COL4A4
Pubmed	30069816	In silico analysis of SLC3A1 and SLC7A9 mutations in Iranian patients with Cystinuria.			Pubmed	2.45e-05	0.77	0.00193	0.0212	2	2	SLC3A1,SLC7A9
Pubmed	25282623	E-cadherin and CD10 expression in atypical hyperplastic and malignant endometrial lesions.			Pubmed	2.45e-05	0.77	0.00193	0.0212	2	2	MME,CDH1
Pubmed	16099815	Megalin is a receptor for apolipoprotein M, and kidney-specific megalin-deficiency confers urinary excretion of apolipoprotein M.			Pubmed	2.45e-05	0.77	0.00193	0.0212	2	2	APOM,LRP2
Pubmed	20197625	Loss of the BMP antagonist USAG-1 ameliorates disease in a mouse model of the progressive hereditary kidney disease Alport syndrome.			Pubmed	2.45e-05	0.77	0.00193	0.0212	2	2	COL4A3,SOSTDC1
Pubmed	16232198	Establishment of an immortalized cell line from a precancerous lesion of lung adenocarcinoma, and genes highly expressed in the early stages of lung adenocarcinoma development.			Pubmed	2.45e-05	0.77	0.00193	0.0212	2	2	S100A2,TACSTD2
Pubmed	24563210	CUBN and NEBL common variants in the chromosome 10p13 linkage region are associated with multibacillary leprosy in Vietnam.			Pubmed	2.45e-05	0.77	0.00193	0.0212	2	2	NEBL,CUBN
Pubmed	12368218	Co-localization of nephrin, podocin, and the actin cytoskeleton: evidence for a role in podocyte foot process formation.			Pubmed	2.45e-05	0.77	0.00193	0.0212	2	2	NPHS2,NPHS1
Pubmed	12694203	Positive influence of AP-2alpha transcription factor on cadherin gene expression and differentiation of the ocular surface.			Pubmed	2.45e-05	0.77	0.00193	0.0212	2	2	TFAP2A,TFAP2B
Pubmed	16138908	Molecular genetic analysis of SLC3A1 and SLC7A9 genes in Czech and Slovak cystinuric patients.			Pubmed	2.45e-05	0.77	0.00193	0.0212	2	2	SLC3A1,SLC7A9
Pubmed	12167606	rBAT-b(0,+)AT heterodimer is the main apical reabsorption system for cystine in the kidney.			Pubmed	2.45e-05	0.77	0.00193	0.0212	2	2	SLC3A1,SLC7A9
Pubmed	26318331	Neuregulin 1 protects against ischemic brain injury via ErbB4 receptors by increasing GABAergic transmission.			Pubmed	2.45e-05	0.77	0.00193	0.0212	2	2	ERBB4,PVALB
Pubmed	28674241	Mutation analysis of COL4A3 and COL4A4 genes in a Chinese autosomal-dominant Alport syndrome family.			Pubmed	2.45e-05	0.77	0.00193	0.0212	2	2	COL4A3,COL4A4
Pubmed	7063850	Human liver MAO-A and MAO-B separated by immunoaffinity chromatography with MAO-B-specific monoclonal antibody.			Pubmed	2.45e-05	0.77	0.00193	0.0212	2	2	MAOA,MAOB
Pubmed	21595846	Role of megalin and cubilin in the metabolism of vitamin D(3).			Pubmed	2.45e-05	0.77	0.00193	0.0212	2	2	CUBN,LRP2
Pubmed	7555706	Cloning and characterization of a second AP-2 transcription factor: AP-2 beta.			Pubmed	2.45e-05	0.77	0.00193	0.0212	2	2	TFAP2A,TFAP2B
Pubmed	23383138	Regulation of two renal chloride transporters, AE1 and pendrin, by electrolytes and aldosterone.			Pubmed	2.45e-05	0.77	0.00193	0.0212	2	2	SLC26A4,SLC4A1
Pubmed	19914244	Structural activity relationship of flavonoids with estrogen-related receptor gamma.			Pubmed	2.45e-05	0.77	0.00193	0.0212	2	2	ESRRG,PPARGC1A
Pubmed	10591056	MAO-A and -B gene knock-out mice exhibit distinctly different behavior.			Pubmed	2.45e-05	0.77	0.00193	0.0212	2	2	MAOA,MAOB
Pubmed	3540317	Assignment of genes for human monoamine oxidases A and B to the X chromosome.			Pubmed	2.45e-05	0.77	0.00193	0.0212	2	2	MAOA,MAOB
Pubmed	27983983	Clusterin in the protein corona plays a key role in the stealth effect of nanoparticles against phagocytes.			Pubmed	2.45e-05	0.77	0.00193	0.0212	2	2	CLU,ACE2
Pubmed	18230605	Betaine-homocysteine S-methyltransferase-2 is an S-methylmethionine-homocysteine methyltransferase.			Pubmed	2.45e-05	0.77	0.00193	0.0212	2	2	BHMT,BHMT2
Pubmed	14983511	Differential distribution of cubilin and megalin expression in the mouse embryo.			Pubmed	2.45e-05	0.77	0.00193	0.0212	2	2	CUBN,LRP2
Pubmed	11350956	The intracellular localization of the mineralocorticoid receptor is regulated by 11beta-hydroxysteroid dehydrogenase type 2.			Pubmed	2.45e-05	0.77	0.00193	0.0212	2	2	NR3C2,HSD11B2
Pubmed	9580872	Molecular cloning, sequence, and expression of mouse flavin-containing monooxygenases 1 and 5 (FMO1 and FMO5).			Pubmed	2.45e-05	0.77	0.00193	0.0212	2	2	FMO1,FMO5
Pubmed	20219833	Long-term follow-up of patients with Bartter syndrome type I and II.			Pubmed	2.45e-05	0.77	0.00193	0.0212	2	2	KCNJ1,SLC12A1
Pubmed	8989526	Comparative analysis of AP-2 alpha and AP-2 beta gene expression during murine embryogenesis.			Pubmed	2.45e-05	0.77	0.00193	0.0212	2	2	TFAP2A,TFAP2B
Pubmed	16738539	The PDZ domain protein PDZK1 interacts with human peptide transporter PEPT2 and enhances its transport activity.			Pubmed	2.45e-05	0.77	0.00193	0.0212	2	2	PDZK1,SLC15A2
Pubmed	17216251	Nine novel COL4A3 and COL4A4 mutations and polymorphisms identified in inherited membrane diseases.			Pubmed	2.45e-05	0.77	0.00193	0.0212	2	2	COL4A3,COL4A4
Pubmed	18408592	Mineralocorticoid receptor and 11beta-hydroxysteroid dehydrogenase type II expression in renal cell neoplasms: a tissue microarray and quantitative RT-PCR study.			Pubmed	2.45e-05	0.77	0.00193	0.0212	2	2	NR3C2,HSD11B2
Pubmed	9504046	Specificity within the EGF family/ErbB receptor family signaling network.			Pubmed	2.45e-05	0.77	0.00193	0.0212	2	2	ERBB3,EGF
Pubmed	11854170	Genotype/phenotype correlations of NPHS1 and NPHS2 mutations in nephrotic syndrome advocate a functional inter-relationship in glomerular filtration.			Pubmed	2.45e-05	0.77	0.00193	0.0212	2	2	NPHS2,NPHS1
Pubmed	25307543	Collagen type IV-related nephropathies in Portugal: pathogenic COL4A3 and COL4A4 mutations and clinical characterization of 25 families.			Pubmed	2.45e-05	0.77	0.00193	0.0212	2	2	COL4A3,COL4A4
Pubmed	27281700	Genetic, Clinical, and Pathologic Backgrounds of Patients with Autosomal Dominant Alport Syndrome.			Pubmed	2.45e-05	0.77	0.00193	0.0212	2	2	COL4A3,COL4A4
Pubmed	27197912	Association Analysis of the Cubilin (CUBN) and Megalin (LRP2) Genes with ESRD in African Americans.			Pubmed	2.45e-05	0.77	0.00193	0.0212	2	2	CUBN,LRP2
Pubmed	16895672	[From Alport syndrome to benign familial hematuria: clinical and genetic aspect].			Pubmed	2.45e-05	0.77	0.00193	0.0212	2	2	COL4A3,COL4A4
Pubmed	25618115	Association analysis of the functional MAOA gene promoter and MAOB gene intron 13 polymorphisms in tension type headache patients.			Pubmed	2.45e-05	0.77	0.00193	0.0212	2	2	MAOA,MAOB
Pubmed	12098640	Association of monoamine oxidase A gene polymorphism with Alzheimer's disease and Lewy body variant.			Pubmed	2.45e-05	0.77	0.00193	0.0212	2	2	MAOA,MAOB
Pubmed	25165391	Calcium intake and ion transporter genetic polymorphisms interact in human colorectal neoplasia risk in a 2-phase study.			Pubmed	2.45e-05	0.77	0.00193	0.0212	2	2	KCNJ1,SLC12A1
Pubmed	28851073	4-Phenybutyric acid promotes gastric cancer cell migration via histone deacetylase inhibition-mediated HER3/HER4 up-regulation.			Pubmed	2.45e-05	0.77	0.00193	0.0212	2	2	ERBB3,ERBB4
Pubmed	25381091	Whole exome sequencing reveals novel COL4A3 and COL4A4 mutations and resolves diagnosis in Chinese families with kidney disease.			Pubmed	2.45e-05	0.77	0.00193	0.0212	2	2	COL4A3,COL4A4
Pubmed	24825475	Clusterin/ApoJ enhances central leptin signaling through Lrp2-mediated endocytosis.			Pubmed	2.45e-05	0.77	0.00193	0.0212	2	2	CLU,LRP2
Pubmed	15280517	Collagen type IV (alpha3-alpha4) nephropathy: from isolated haematuria to renal failure.			Pubmed	2.45e-05	0.77	0.00193	0.0212	2	2	COL4A3,COL4A4
Pubmed	15880327	The genetics of thin basement membrane nephropathy.			Pubmed	2.45e-05	0.77	0.00193	0.0212	2	2	COL4A3,COL4A4
Pubmed	10588648	Luminal heterodimeric amino acid transporter defective in cystinuria.			Pubmed	2.45e-05	0.77	0.00193	0.0212	2	2	SLC3A1,SLC7A9
Pubmed	28982350	Pilot study indicate role of preferentially transmitted monoamine oxidase gene variants in behavioral problems of male ADHD probands.			Pubmed	2.45e-05	0.77	0.00193	0.0212	2	2	MAOA,MAOB
Pubmed	21255007	Clinical, biochemical and molecular characterization of cystinuria in a cohort of 12 patients.			Pubmed	2.45e-05	0.77	0.00193	0.0212	2	2	SLC3A1,SLC7A9
Pubmed	10202537	Monoamine oxidase: from genes to behavior.			Pubmed	2.45e-05	0.77	0.00193	0.0212	2	2	MAOA,MAOB
Pubmed	18242180	Peroxisome proliferator-activated receptor gamma coactivator-1 alpha (PGC-1alpha) upregulated E-cadherin expression in HepG2 cells.			Pubmed	2.45e-05	0.77	0.00193	0.0212	2	2	PPARGC1A,CDH1
Pubmed	21737451	Activation of the bumetanide-sensitive Na+,K+,2Cl- cotransporter (NKCC2) is facilitated by Tamm-Horsfall protein in a chloride-sensitive manner.			Pubmed	2.45e-05	0.77	0.00193	0.0212	2	2	UMOD,SLC12A1
Pubmed	26213999	Evolutionary Analyses and Natural Selection of Betaine-Homocysteine S-Methyltransferase (BHMT) and BHMT2 Genes.			Pubmed	2.45e-05	0.77	0.00193	0.0212	2	2	BHMT,BHMT2
Pubmed	21473025	Autosomal Dominant Tubulointerstitial Kidney Disease, REN-Related			Pubmed	2.45e-05	0.77	0.00193	0.0212	2	2	UMOD,REN
Pubmed	19390858	ErbB family immunohistochemical expression in colorectal cancer patients with higher risk of recurrence after radical surgery.			Pubmed	2.45e-05	0.77	0.00193	0.0212	2	2	ERBB3,ERBB4
Pubmed	11087663	Betaine-homocysteine methyltransferase-2: cDNA cloning, gene sequence, physical mapping, and expression of the human and mouse genes.			Pubmed	2.45e-05	0.77	0.00193	0.0212	2	2	BHMT,BHMT2
Pubmed	17260971	Effects of glycosylation on the structure and function of the extracellular chaperone clusterin.			Pubmed	2.45e-05	0.77	0.00193	0.0212	2	2	CLU,LRP2
Pubmed	12818402	Investigations of a common genetic variant in betaine-homocysteine methyltransferase (BHMT) in coronary artery disease.			Pubmed	2.45e-05	0.77	0.00193	0.0212	2	2	BHMT,BHMT2
Pubmed	19924828	Expression of PTPRO in the interneurons of adult mouse olfactory bulb.			Pubmed	2.54e-05	0.798	0.00198	0.0217	3	12	GAD1,PVALB,CALB1
Pubmed	27597235	Planar cell polarity genes Celsr1 and Vangl2 are necessary for kidney growth, differentiation, and rostrocaudal patterning.			Pubmed	2.54e-05	0.798	0.00198	0.0217	3	12	UMOD,NPHS1,CALB1
Pubmed	16225856	The adhesion molecule TAG-1 is required for proper migration of the superficial migratory stream in the medulla but not of cortical interneurons.			Pubmed	2.54e-05	0.798	0.00198	0.0217	3	12	GAD1,PVALB,CALB1
Pubmed	24717294	Targeted deletion of kidney glucose-6 phosphatase leads to nephropathy.			Pubmed	2.54e-05	0.798	0.00198	0.0217	3	12	HMGCS2,NPHS2,G6PC1
Pubmed	28591570	Compromised Survival of Cerebellar Molecular Layer Interneurons Lacking GDNF Receptors GFR?1 or RET Impairs Normal Cerebellar Motor Learning.			Pubmed	2.54e-05	0.798	0.00198	0.0217	3	12	GAD1,PVALB,CALB1
Pubmed	20339536	Genome-wide association of lipid-lowering response to statins in combined study populations.			Pubmed	3e-05	0.946	0.00234	0.0256	5	72	CHL1,COBLL1,GRB14,SOSTDC1,CLDN8
Pubmed	20562862	A mouse knockout library for secreted and transmembrane proteins.			Pubmed	3.25e-05	1	0.00252	0.0275	10	398	TSPAN12,MAL,FLRT3,TRHDE,GALNT14,CXCL14,SLC44A4,CLDN8,ACE2,GRAMD1C
Pubmed	21512138	An EGFR-ERK-SOX9 signaling cascade links urothelial development and regeneration to cancer.			Pubmed	3.28e-05	1	0.00252	0.0275	3	13	ERBB3,ERBB4,EGF
Pubmed	29488136	Ambra1 Shapes Hippocampal Inhibition/Excitation Balance: Role in Neurodevelopmental Disorders.			Pubmed	3.28e-05	1	0.00252	0.0275	3	13	GAD1,PVALB,CALB1
Pubmed	21406566	Missing-in-metastasis MIM/MTSS1 promotes actin assembly at intercellular junctions and is required for integrity of kidney epithelia.			Pubmed	3.28e-05	1	0.00252	0.0275	3	13	NPHS2,NPHS1,CDH1
Pubmed	10866673	Hepatocyte nuclear factor 3beta (Foxa2) is dispensable for maintaining the differentiated state of the adult hepatocyte.			Pubmed	3.28e-05	1	0.00252	0.0275	3	13	DIO1,SLC2A2,PCK1
Pubmed	17314325	Pax2 and pax8 regulate branching morphogenesis and nephron differentiation in the developing kidney.			Pubmed	3.28e-05	1	0.00252	0.0275	3	13	LHX1,SLC12A1,CDH1
Pubmed	20151419	Differential gene expression in migrating cortical interneurons during mouse forebrain development.			Pubmed	3.28e-05	1	0.00252	0.0275	3	13	CHL1,GAD1,CALB1
Pubmed	12975309	The secreted protein discovery initiative (SPDI), a large-scale effort to identify novel human secreted and transmembrane proteins: a bioinformatics assessment.			Pubmed	3.57e-05	1	0.00273	0.0298	16	986	TSPAN12,ADGRG1,CA10,CCN6,ANGPTL3,FLRT3,IL17RB,TRHDE,GALNT14,CXCL14,SLC44A4,CLDN8,ACE2,UGT2A3,GRAMD1C,CDH16
Pubmed	24929016	GATA4 and GATA6 regulate intestinal epithelial cytodifferentiation during development.			Pubmed	3.75e-05	1	0.00286	0.0313	4	38	FABP1,CLDN8,SLC2A2,SLC10A2
Pubmed	19334288	Three-dimensional visualization of testis cord morphogenesis, a novel tubulogenic mechanism in development.			Pubmed	3.79e-05	1	0.00288	0.0315	7	183	SLC27A2,GULP1,NEBL,SLC3A1,LHX1,ACE2,SLCO4C1
Pubmed	31923383	Functional domains of the FgfrL1 receptor.			Pubmed	4.16e-05	1	0.00308	0.0337	3	14	LHX1,LRP2,CDH1
Pubmed	16973757	The expression profiles of nuclear receptors in the developing and adult kidney.			Pubmed	4.16e-05	1	0.00308	0.0337	3	14	NR3C2,NR1H4,CDH1
Pubmed	27917469	Association of dysfunctional synapse defective 1 (SYDE1) with restricted fetal growth - SYDE1 regulates placental cell migration and invasion.			Pubmed	4.16e-05	1	0.00308	0.0337	3	14	MME,REN,ACE2
Pubmed	12878203	Characterization of the enzymatic activity of human kallikrein 6: Autoactivation, substrate specificity, and regulation by inhibitors.			Pubmed	4.16e-05	1	0.00308	0.0337	3	14	FGB,COL4A3,COL4A4
Pubmed	29588831	Analysis of the expression pattern of the schizophrenia-risk and intellectual disability gene TCF4 in the developing and adult brain suggests a role in development and plasticity of cortical and hippocampal neurons.			Pubmed	4.16e-05	1	0.00308	0.0337	3	14	GAD1,PVALB,CALB1
Pubmed	14531806	PDZK1: I. a major scaffolder in brush borders of proximal tubular cells.			Pubmed	4.16e-05	1	0.00308	0.0337	3	14	PDZK1,SLC17A1,PDZK1IP1
Pubmed	12642494	Molecular regionalization of the neocortex is disrupted in Fgf8 hypomorphic mutants.			Pubmed	4.16e-05	1	0.00308	0.0337	3	14	FGFR3,EMX2,CDH6
Pubmed	12571102	FGF signaling through FGFR1 is required for olfactory bulb morphogenesis.			Pubmed	4.16e-05	1	0.00308	0.0337	3	14	GAD1,FGFR3,EMX2
Pubmed	17409253	Rac1 controls the formation of midline commissures and the competency of tangential migration in ventral telencephalic neurons.			Pubmed	4.16e-05	1	0.00308	0.0337	3	14	GAD1,PVALB,CALB1
Pubmed	15556938	Identification of FGF10 targets in the embryonic lung epithelium during bud morphogenesis.			Pubmed	4.16e-05	1	0.00308	0.0337	3	14	ANXA3,TSPAN8,TACSTD2
Pubmed	10706142	Inhibition of distal lung morphogenesis in Nkx2.1(-/-) embryos.			Pubmed	4.16e-05	1	0.00308	0.0337	3	14	COL4A3,COL4A4,CDH1
Pubmed	25564653	ERBB3-mediated regulation of Bergmann glia proliferation in cerebellar lamination.			Pubmed	4.16e-05	1	0.00308	0.0337	3	14	ERBB3,PVALB,CALB1
Pubmed	31152445	Diverse spinal commissural neuron populations revealed by fate mapping and molecular profiling using a novel Robo3			Pubmed	4.61e-05	1	0.00339	0.0371	4	40	CHL1,GAD1,CALB1,LHX1
Pubmed	11208732	Chromosomal organization of candidate genes involved in cholesterol gallstone formation: a murine gallstone map.			Pubmed	4.61e-05	1	0.00339	0.0371	4	40	FABP1,NR1H4,SLC10A2,LRP2
Pubmed	19501082	Analysis of early nephron patterning reveals a role for distal RV proliferation in fusion to the ureteric tip via a cap mesenchyme-derived connecting segment.			Pubmed	5e-05	1	0.00365	0.04	5	80	CALB1,CXCL14,LHX1,CDH1,CDH6
Pubmed	20602615	Physiogenomic analysis of statin-treated patients: domain-specific counter effects within the ACACB gene on low-density lipoprotein cholesterol?			Pubmed	5.13e-05	1	0.00365	0.04	7	192	GAD1,AOC1,CYP3A5,APOM,MTTP,PCK1,GABRA2
Pubmed	22110055	FGF8 is essential for formation of the ductal system in the male reproductive tract.			Pubmed	5.19e-05	1	0.00365	0.04	3	15	FGFR3,LHX1,EMX2
Pubmed	19332558	The protocadherin gene Celsr3 is required for interneuron migration in the mouse forebrain.			Pubmed	5.19e-05	1	0.00365	0.04	3	15	ERBB4,PVALB,CALB1
Pubmed	16615895	Tangential neuronal migration controls axon guidance: a role for neuregulin-1 in thalamocortical axon navigation.			Pubmed	5.19e-05	1	0.00365	0.04	3	15	GAD1,ERBB4,CALB1
Pubmed	15553237	Screening of the interaction between xenobiotic transporters and PDZ proteins.			Pubmed	5.19e-05	1	0.00365	0.04	3	15	PDZK1,SLC15A2,SLC22A5
Pubmed	26389685	Cell adhesion molecule contactin-associated protein 3 is expressed in the mouse basal ganglia during early postnatal stages.			Pubmed	5.19e-05	1	0.00365	0.04	3	15	GAD1,PVALB,CALB1
Pubmed	7628695	Targeted disruption of the glucocorticoid receptor gene blocks adrenergic chromaffin cell development and severely retards lung maturation.			Pubmed	5.19e-05	1	0.00365	0.04	3	15	SLC17A1,G6PC1,PCK1
Pubmed	16675530	Sprouty2 is involved in male sex organogenesis by controlling fibroblast growth factor 9-induced mesonephric cell migration to the developing testis.			Pubmed	5.19e-05	1	0.00365	0.04	3	15	FGF9,LHX1,EGF
Pubmed	16712791	Identification of intrahepatic cholangiocarcinoma related genes by comparison with normal liver tissues using expressed sequence tags.			Pubmed	5.25e-05	1	0.00365	0.04	11	510	GLYAT,SLC17A3,SPINK1,AZGP1,PBLD,BHMT2,KNG1,MAP7,GBA3,MTTP,HAO2
Pubmed	19030180	Dlx1&2 and Mash1 transcription factors control striatal patterning and differentiation through parallel and overlapping pathways.			Pubmed	5.29e-05	1	0.00365	0.04	6	132	GAD1,ERBB4,ESRRG,NR1H4,LHX1,EMX2
Pubmed	21343368	Genetic mosaic analysis reveals a major role for frizzled 4 and frizzled 8 in controlling ureteric growth in the developing kidney.			Pubmed	6.36e-05	1	0.00365	0.04	3	16	UMOD,CALB1,CDH1
Pubmed	24470103	Elevated fibroblast growth factor 23 exerts its effects on placenta and regulates vitamin D metabolism in pregnancy of Hyp mice.			Pubmed	6.36e-05	1	0.00365	0.04	3	16	CYP24A1,KL,FGFR3
Pubmed	29258872	Prdm13 is required for Ebf3+ amacrine cell formation in the retina.			Pubmed	6.36e-05	1	0.00365	0.04	3	16	GAD1,CALB1,TFAP2A
Pubmed	17229764	Notch2, but not Notch1, is required for proximal fate acquisition in the mammalian nephron.			Pubmed	6.36e-05	1	0.00365	0.04	3	16	LHX1,CDH1,CDH6
Pubmed	17301087	Ptf1a is essential for the differentiation of GABAergic and glycinergic amacrine cells and horizontal cells in the mouse retina.			Pubmed	6.36e-05	1	0.00365	0.04	3	16	GAD1,CALB1,LHX1
Pubmed	32504627	The core SWI/SNF catalytic subunit Brg1 regulates nephron progenitor cell proliferation and differentiation.			Pubmed	6.36e-05	1	0.00365	0.04	3	16	FGF9,SLC12A1,LRP2
Pubmed	31669249	Sox9 in mouse urogenital sinus epithelium mediates elongation of prostatic buds and expression of genes involved in epithelial cell migration.			Pubmed	6.36e-05	1	0.00365	0.04	3	16	SBSPON,CXCL14,CDH1
Pubmed	31200100	Embryonic and postnatal development of mouse olfactory tubercle.			Pubmed	6.36e-05	1	0.00365	0.04	3	16	GAD1,PVALB,CALB1
Pubmed	15240797	Fibroblast growth factor receptor 1 is required for the proliferation of hippocampal progenitor cells and for hippocampal growth in mouse.			Pubmed	6.36e-05	1	0.00365	0.04	3	16	PVALB,FGFR3,CALB1
Pubmed	21466799	XY Sox9 embryonic loss-of-function mouse mutants show complete sex reversal and produce partially fertile XY oocytes.			Pubmed	6.36e-05	1	0.00365	0.04	3	16	ERBB3,FGF9,EMX2
Pubmed	16007083	Mice lacking Dlx1 show subtype-specific loss of interneurons, reduced inhibition and epilepsy.			Pubmed	6.36e-05	1	0.00365	0.04	3	16	GAD1,PVALB,CALB1
Pubmed	25993409	Hairy/Enhancer-of-Split MEGANE and Proneural MASH1 Factors Cooperate Synergistically in Midbrain GABAergic Neurogenesis.			Pubmed	6.36e-05	1	0.00365	0.04	3	16	GAD1,CALB1,LHX1
Pubmed	24305825	Regulation of spine formation by ErbB4 in PV-positive interneurons.			Pubmed	7.27e-05	1	0.00365	0.04	2	3	ERBB4,PVALB
Pubmed	23881096	Neuropsychological correlates of transcription factor AP-2Beta, and its interaction with COMT and MAOA in healthy females.			Pubmed	7.27e-05	1	0.00365	0.04	2	3	MAOA,TFAP2B
Pubmed	22158051	Tumor suppressor Alpha B-crystallin (CRYAB) associates with the cadherin/catenin adherens junction and impairs NPC progression-associated properties.			Pubmed	7.27e-05	1	0.00365	0.04	2	3	CRYAB,CDH1
Pubmed	32744742	Complex IV subunit isoform COX6A2 protects fast-spiking interneurons from oxidative stress and supports their function.			Pubmed	7.27e-05	1	0.00365	0.04	2	3	GAD1,PVALB
Pubmed	22016805	Apolipoprotein J/clusterin in human erythrocytes is involved in the molecular process of defected material disposal during vesiculation.			Pubmed	7.27e-05	1	0.00365	0.04	2	3	CLU,SLC4A1
Pubmed	12112465	Expression of ErbB3, ErbB4, and neuregulin-1 mRNA during tooth development.			Pubmed	7.27e-05	1	0.00365	0.04	2	3	ERBB3,ERBB4
Pubmed	26612412	A Three-Way Interaction among Maternal and Fetal Variants Contributing to Congenital Heart Defects.			Pubmed	7.27e-05	1	0.00365	0.04	2	3	BHMT2,GPX3
Pubmed	25846410	Obstructive heart defects associated with candidate genes, maternal obesity, and folic acid supplementation.			Pubmed	7.27e-05	1	0.00365	0.04	2	3	BHMT,BHMT2
Pubmed	23028640	Inverse regulation of the cytosolic Ca²? buffer parvalbumin and mitochondrial volume in muscle cells via SIRT1/PGC-1? axis.			Pubmed	7.27e-05	1	0.00365	0.04	2	3	PPARGC1A,PVALB
Pubmed	25398695	Inhibition of Excessive Monoamine Oxidase A/B Activity Protects Against Stress-induced Neuronal Death in Huntington Disease.			Pubmed	7.27e-05	1	0.00365	0.04	2	3	MAOA,MAOB
Pubmed	7573490	Cloning, embryonic expression, and alternative splicing of a murine kidney-specific Na-K-Cl cotransporter.			Pubmed	7.27e-05	1	0.00365	0.04	2	3	UMOD,SLC12A1
Pubmed	15385584	Co-expression of pendrin, vacuolar H+-ATPase alpha4-subunit and carbonic anhydrase II in epithelial cells of the murine endolymphatic sac.			Pubmed	7.27e-05	1	0.00365	0.04	2	3	SLC26A4,ATP6V0A4
Pubmed	21610556	Associations of MAOA-VNTR or 5HTT-LPR alleles with attention-deficit hyperactivity disorder symptoms are moderated by platelet monoamine oxidase B activity.			Pubmed	7.27e-05	1	0.00365	0.04	2	3	MAOA,MAOB
Pubmed	29356306	Evidence of interaction between genes in the folate/homocysteine metabolic pathway in controlling risk of non-syndromic oral cleft.			Pubmed	7.27e-05	1	0.00365	0.04	2	3	BHMT,BHMT2
Pubmed	17224907	Loss of AP-2alpha results in deregulation of E-cadherin and MMP-9 and an increase in tumorigenicity of colon cancer cells in vivo.			Pubmed	7.27e-05	1	0.00365	0.04	2	3	TFAP2A,CDH1
Pubmed	28704582	Autosomal dominant form of type IV collagen nephropathy exists among patients with hereditary nephritis difficult to diagnose clinicopathologically.			Pubmed	7.27e-05	1	0.00365	0.04	2	3	COL4A3,COL4A4
Pubmed	10559227	ErbB2 and ErbB3 receptors mediate inhibition of calcium-dependent chloride secretion in colonic epithelial cells.			Pubmed	7.27e-05	1	0.00365	0.04	2	3	ERBB3,EGF
Pubmed	17721934	Functional activity of the mouse flavin-containing monooxygenase forms 1, 3, and 5.			Pubmed	7.27e-05	1	0.00365	0.04	2	3	FMO1,FMO5
Pubmed	7768901	Identification of glycoprotein 330 as an endocytic receptor for apolipoprotein J/clusterin.			Pubmed	7.27e-05	1	0.00365	0.04	2	3	CLU,LRP2
Pubmed	24413855	Steroid-resistant nephrotic syndrome: impact of genetic testing.			Pubmed	7.27e-05	1	0.00365	0.04	2	3	NPHS2,NPHS1
Pubmed	7729426	Transcriptional activation by Myc is under negative control by the transcription factor AP-2.			Pubmed	7.27e-05	1	0.00365	0.04	2	3	TFAP2A,TFAP2B
Pubmed	10716718	Abnormal development of Purkinje cells and lymphocytes in Atm mutant mice.			Pubmed	7.27e-05	1	0.00365	0.04	2	3	PVALB,CALB1
Pubmed	21752154	Effects of dietary flavonoids, luteolin, and quercetin on the reversal of epithelial-mesenchymal transition in A431 epidermal cancer cells.			Pubmed	7.27e-05	1	0.00365	0.04	2	3	EGF,CDH1
Pubmed	15547295	Intestinal fatty acid binding protein and microsomal triglyceride transfer protein polymorphisms in French-Canadian youth.			Pubmed	7.27e-05	1	0.00365	0.04	2	3	FABP1,MTTP
Pubmed	32607506	CD209L/L-SIGN and CD209/DC-SIGN act as receptors for SARS-CoV-2 and are differentially expressed in lung and kidney epithelial and endothelial cells.			Pubmed	7.27e-05	1	0.00365	0.04	2	3	CLEC4M,ACE2
Pubmed	18322073	PDZK1 regulates two intestinal solute carriers (Slc15a1 and Slc22a5) in mice.			Pubmed	7.27e-05	1	0.00365	0.04	2	3	PDZK1,SLC22A5
Pubmed	25533808	Loss of Sprouty2 in human high-grade serous ovarian carcinomas promotes EGF-induced E-cadherin down-regulation and cell invasion.			Pubmed	7.27e-05	1	0.00365	0.04	2	3	EGF,CDH1
Pubmed	25024183	Impaired excitability of somatostatin- and parvalbumin-expressing cortical interneurons in a mouse model of Dravet syndrome.			Pubmed	7.27e-05	1	0.00365	0.04	2	3	GAD1,PVALB
Pubmed	30113482	Contributions of rare coding variants in hypotension syndrome genes to population blood pressure variation.			Pubmed	7.27e-05	1	0.00365	0.04	2	3	KCNJ1,SLC12A1
Pubmed	12692551	Prox1 function controls progenitor cell proliferation and horizontal cell genesis in the mammalian retina.			Pubmed	7.27e-05	1	0.00365	0.04	2	3	PVALB,CALB1
Pubmed	9632747	RB and c-Myc activate expression of the E-cadherin gene in epithelial cells through interaction with transcription factor AP-2.			Pubmed	7.27e-05	1	0.00365	0.04	2	3	TFAP2A,CDH1
Pubmed	15202934	The nuclear bile acid receptor FXR is activated by PGC-1alpha in a ligand-dependent manner.			Pubmed	7.27e-05	1	0.00365	0.04	2	3	PPARGC1A,NR1H4
Pubmed	30691124	Kidney Injury by Variants in the			Pubmed	7.27e-05	1	0.00365	0.04	2	3	NPHS2,NPHS1
Pubmed	18430257	ADHD and Disruptive Behavior scores - associations with MAO-A and 5-HTT genes and with platelet MAO-B activity in adolescents.			Pubmed	7.27e-05	1	0.00365	0.04	2	3	MAOA,MAOB
Pubmed	18263657	Brain angiotensin-converting enzymes: role of angiotensin-converting enzyme 2 in processing angiotensin II in mice.			Pubmed	7.27e-05	1	0.00365	0.04	2	3	MME,ACE2
Pubmed	8619928	Identification of fibroblast growth factor 9 (FGF9) as a high affinity, heparin dependent ligand for FGF receptors 3 and 2 but not for FGF receptors 1 and 4.			Pubmed	7.27e-05	1	0.00365	0.04	2	3	FGF9,FGFR3
Pubmed	21203803	Expression and significance of HER family receptors in neuroblastic tumors.			Pubmed	7.27e-05	1	0.00365	0.04	2	3	ERBB3,ERBB4
Pubmed	26628486	Apoptosis in Early Salivary Gland Duct Morphogenesis and Lumen Formation.			Pubmed	7.27e-05	1	0.00365	0.04	2	3	KRT7,CDH1
Pubmed	24252324	Molecular diagnosis of distal renal tubular acidosis in Tunisian patients: proposed algorithm for Northern Africa populations for the ATP6V1B1, ATP6V0A4 and SCL4A1 genes.			Pubmed	7.27e-05	1	0.00365	0.04	2	3	SLC4A1,ATP6V0A4
Pubmed	22158510	Neuregulin 1 represses limbic epileptogenesis through ErbB4 in parvalbumin-expressing interneurons.			Pubmed	7.27e-05	1	0.00365	0.04	2	3	ERBB4,PVALB
Pubmed	27285994	Differential Expression Patterns of EGF, EGFR, and ERBB4 in Nasal Polyp Epithelium.			Pubmed	7.27e-05	1	0.00365	0.04	2	3	ERBB4,EGF
Pubmed	15261699	Polymorphisms of dopamine degradation enzyme (COMT and MAO) genes and tardive dyskinesia in patients with schizophrenia.			Pubmed	7.27e-05	1	0.00365	0.04	2	3	MAOA,MAOB
Pubmed	22949882	Antisense oligonucleotide against clusterin regulates human hepatocellular carcinoma invasion through transcriptional regulation of matrix metalloproteinase-2 and E-cadherin.			Pubmed	7.27e-05	1	0.00365	0.04	2	3	CLU,CDH1
Pubmed	27927599	Angiotensin-converting enzyme 2 amplification limited to the circulation does not protect mice from development of diabetic nephropathy.			Pubmed	7.27e-05	1	0.00365	0.04	2	3	COL4A3,ACE2
Pubmed	15659563	Nephrotic plasma alters slit diaphragm-dependent signaling and translocates nephrin, Podocin, and CD2 associated protein in cultured human podocytes.			Pubmed	7.27e-05	1	0.00365	0.04	2	3	NPHS2,NPHS1
Pubmed	24901400	High incidence of ErbB3, ErbB4, and MET expression in ovarian cancer.			Pubmed	7.27e-05	1	0.00365	0.04	2	3	ERBB3,ERBB4
Pubmed	17203215	von Hippel Lindau tumor suppressor regulates hepatic glucose metabolism by controlling expression of glucose transporter 2 and glucose 6-phosphatase.			Pubmed	7.27e-05	1	0.00365	0.04	2	3	SLC2A2,G6PC1
Pubmed	15954103	Novel COL4A5, COL4A4, and COL4A3 mutations in Alport syndrome.			Pubmed	7.27e-05	1	0.00365	0.04	2	3	COL4A3,COL4A4
Pubmed	28653892	Specific antibodies and sensitive immunoassays for the human epidermal growth factor receptors (HER2, HER3, and HER4).			Pubmed	7.27e-05	1	0.00365	0.04	2	3	ERBB3,ERBB4
Pubmed	27859054	Alport syndrome: impact of digenic inheritance in patients management.			Pubmed	7.27e-05	1	0.00365	0.04	2	3	COL4A3,COL4A4
Pubmed	17555714	Rudiment incisors survive and erupt as supernumerary teeth as a result of USAG-1 abrogation.			Pubmed	7.27e-05	1	0.00365	0.04	2	3	FGFR3,SOSTDC1
Pubmed	32978288	Processing of Hippocampal Network Activity in the Receiver Network of the Medial Entorhinal Cortex Layer V.			Pubmed	7.27e-05	1	0.00365	0.04	2	3	GAD1,PVALB
Pubmed	17264314	Screening for increased plasma urea levels in a large-scale ENU mouse mutagenesis project reveals kidney disease models.			Pubmed	7.27e-05	1	0.00365	0.04	2	3	UMOD,SLC12A1
Pubmed	17396119	Sixteen novel mutations identified in COL4A3, COL4A4, and COL4A5 genes in Slovenian families with Alport syndrome and benign familial hematuria.			Pubmed	7.27e-05	1	0.00365	0.04	2	3	COL4A3,COL4A4
Pubmed	22226504	Changes in the distribution of calbindin D28-k, parvalbumin, and calretinin in the hippocampus of the circling mouse.			Pubmed	7.27e-05	1	0.00365	0.04	2	3	PVALB,CALB1
Pubmed	15342463	Mouse amnionless, which is required for primitive streak assembly, mediates cell-surface localization and endocytic function of cubilin on visceral endoderm and kidney proximal tubules.			Pubmed	7.27e-05	1	0.00365	0.04	2	3	CUBN,LRP2
Pubmed	30256676	Five Novel Mutations in Chinese Children with Primary Distal Renal Tubular Acidosis.			Pubmed	7.27e-05	1	0.00365	0.04	2	3	SLC4A1,ATP6V0A4
Pubmed	11914075	Epidermal growth factor contains both positive and negative determinants for interaction with ErbB-2/ErbB-3 heterodimers.			Pubmed	7.27e-05	1	0.00365	0.04	2	3	ERBB3,EGF
Pubmed	7473608	Gender differences in hepatic expression of flavin-containing monooxygenase isoforms (FMO1, FMO3, and FMO5) in mice.			Pubmed	7.27e-05	1	0.00365	0.04	2	3	FMO1,FMO5
Pubmed	11867753	An RBCC protein implicated in maintenance of steady-state neuregulin receptor levels.			Pubmed	7.27e-05	1	0.00365	0.04	2	3	ERBB3,ERBB4
Pubmed	20691752	Immunohistochemical localization of calbindin D28-k, parvalbumin, and calretinin in the cerebellar cortex of the circling mouse.			Pubmed	7.27e-05	1	0.00365	0.04	2	3	PVALB,CALB1
Pubmed	10771338	Neurodegenerative and morphogenic changes in a mouse model of temporal lobe epilepsy do not depend on the expression of the calcium-binding proteins parvalbumin, calbindin, or calretinin.			Pubmed	7.27e-05	1	0.00365	0.04	2	3	PVALB,CALB1
Pubmed	30545133	Calretinin Functions in Malignant Mesothelioma Cells Cannot Be Replaced by the Closely Related Ca			Pubmed	7.27e-05	1	0.00365	0.04	2	3	PVALB,CALB1
Pubmed	29845760	Hypoxic-induction of arginase II requires EGF-mediated EGFR activation in human pulmonary microvascular endothelial cells.			Pubmed	7.27e-05	1	0.00365	0.04	2	3	ARG2,EGF
Pubmed	30604288	Identification of the multivalent PDZ protein PDZK1 as a binding partner of sodium-coupled monocarboxylate transporter SMCT1 (SLC5A8) and SMCT2 (SLC5A12).			Pubmed	7.27e-05	1	0.00365	0.04	2	3	PDZK1,SLC5A12
Pubmed	26586816	Interneuron Transcriptional Dysregulation Causes Frequency-Dependent Alterations in the Balance of Inhibition and Excitation in Hippocampus.			Pubmed	7.27e-05	1	0.00365	0.04	2	3	PPARGC1A,PVALB
Pubmed	23333248	ErbB receptor tyrosine kinase family expression levels in urothelial bladder carcinoma.			Pubmed	7.27e-05	1	0.00365	0.04	2	3	ERBB3,ERBB4
Pubmed	26268211	The mineralocorticoid receptor plays a transient role in mouse skin development.			Pubmed	7.27e-05	1	0.00365	0.04	2	3	NR3C2,HSD11B2
Pubmed	24909170	Ligand-associated ERBB2/3 activation confers acquired resistance to FGFR inhibition in FGFR3-dependent cancer cells.			Pubmed	7.27e-05	1	0.00365	0.04	2	3	ERBB3,FGFR3
Pubmed	18818193	Hearing loss in a mouse model of Muenke syndrome.			Pubmed	7.27e-05	1	0.00365	0.04	2	3	FGF9,FGFR3
Pubmed	25451196	Maintenance of GABAergic activity by neuregulin 1-ErbB4 in amygdala for fear memory.			Pubmed	7.27e-05	1	0.00365	0.04	2	3	ERBB4,PVALB
Pubmed	12960147	Effect of clathrin heavy chain- and alpha-adaptin-specific small inhibitory RNAs on endocytic accessory proteins and receptor trafficking in HeLa cells.			Pubmed	7.27e-05	1	0.00365	0.04	2	3	TFAP2A,EGF
Pubmed	19171140	Kaempferol is an estrogen-related receptor alpha and gamma inverse agonist.			Pubmed	7.27e-05	1	0.00365	0.04	2	3	ESRRG,PPARGC1A
Pubmed	18400109	Microarray analysis of E9.5 reduced folate carrier (RFC1; Slc19a1) knockout embryos reveals altered expression of genes in the cubilin-megalin multiligand endocytic receptor complex.			Pubmed	7.27e-05	1	0.00365	0.04	2	3	CUBN,LRP2
Pubmed	20798259	Cubilin is essential for albumin reabsorption in the renal proximal tubule.			Pubmed	7.27e-05	1	0.00365	0.04	2	3	CUBN,LRP2
Pubmed	30805369	Relationships of			Pubmed	7.27e-05	1	0.00365	0.04	2	3	RBP4,PCK1
Pubmed	12470660	PGC-1 and PERC, coactivators of the estrogen receptor-related receptor gamma.			Pubmed	7.27e-05	1	0.00365	0.04	2	3	ESRRG,PPARGC1A
Pubmed	24297698	The metabolic sensors FXR?, PGC-1?, and SIRT1 cooperatively regulate hepatitis B virus transcription.			Pubmed	7.27e-05	1	0.00365	0.04	2	3	PPARGC1A,NR1H4
Pubmed	28575050	Megalin dependent urinary cystatin C excretion in ischemic kidney injury in rats.			Pubmed	7.27e-05	1	0.00365	0.04	2	3	CUBN,LRP2
Pubmed	20691413	Genetic variation in solute carrier genes is associated with preeclampsia.			Pubmed	7.27e-05	1	0.00365	0.04	2	3	SLC4A1,SLCO4C1
Pubmed	25575550	Evidence of digenic inheritance in Alport syndrome.			Pubmed	7.27e-05	1	0.00365	0.04	2	3	COL4A3,COL4A4
Pubmed	25274830	Genetic labeling reveals novel cellular targets of schizophrenia susceptibility gene: distribution of GABA and non-GABA ErbB4-positive cells in adult mouse brain.			Pubmed	7.27e-05	1	0.00365	0.04	2	3	GAD1,ERBB4
Pubmed	12815097	Loss of chloride channel ClC-5 impairs endocytosis by defective trafficking of megalin and cubilin in kidney proximal tubules.			Pubmed	7.27e-05	1	0.00365	0.04	2	3	CUBN,LRP2
Pubmed	29530977	Regulation of hepatic gluconeogenesis by nuclear factor Y transcription factor in mice.			Pubmed	7.27e-05	1	0.00365	0.04	2	3	G6PC1,PCK1
Pubmed	23103418	Role of glutamic acid decarboxylase 67 in regulating cortical parvalbumin and GABA membrane transporter 1 expression: implications for schizophrenia.			Pubmed	7.27e-05	1	0.00365	0.04	2	3	GAD1,PVALB
Pubmed	15254236	Rap1 regulates the formation of E-cadherin-based cell-cell contacts.			Pubmed	7.27e-05	1	0.00365	0.04	2	3	RAP1GAP,CDH1
Pubmed	23465595	Toll-like receptor 4 signaling is required for induction of gluconeogenic gene expression by palmitate in human hepatic carcinoma cells.			Pubmed	7.27e-05	1	0.00365	0.04	2	3	G6PC1,PCK1
Pubmed	27874312	Momilactone B Inhibits Ketosis In Vitro by Regulating the ANGPTL3-LPL Pathway and Inhibiting HMGCS2.			Pubmed	7.27e-05	1	0.00365	0.04	2	3	HMGCS2,ANGPTL3
Pubmed	18424286	Evaluation of type 1 growth factor receptor family expression in benign and malignant thyroid lesions.			Pubmed	7.27e-05	1	0.00365	0.04	2	3	ERBB3,ERBB4
Pubmed	17065357	Analysis of 14 candidate genes for diabetic nephropathy on chromosome 3q in European populations: strongest evidence for association with a variant in the promoter region of the adiponectin gene.			Pubmed	7.27e-05	1	0.00365	0.04	2	3	KNG1,SLC2A2
Pubmed	23054588	The effects of DBH, MAOA, and MAOB on attentional biases for facial expressions.			Pubmed	7.27e-05	1	0.00365	0.04	2	3	MAOA,MAOB
Pubmed	24033287	Unbiased next generation sequencing analysis confirms the existence of autosomal dominant Alport syndrome in a relevant fraction of cases.			Pubmed	7.27e-05	1	0.00365	0.04	2	3	COL4A3,COL4A4
Pubmed	8661133	Chromosomal mapping of the human and mouse homologues of two new members of the AP-2 family of transcription factors.			Pubmed	7.27e-05	1	0.00365	0.04	2	3	TFAP2A,TFAP2B
Pubmed	22013018	Control of blood glucose in the absence of hepatic glucose production during prolonged fasting in mice: induction of renal and intestinal gluconeogenesis by glucagon.			Pubmed	7.27e-05	1	0.00365	0.04	2	3	G6PC1,PCK1
Pubmed	27576055	Collagen IV diseases: A focus on the glomerular basement membrane in Alport syndrome.			Pubmed	7.27e-05	1	0.00365	0.04	2	3	COL4A3,COL4A4
Pubmed	18042078	Diagnostic value of cytokeratin 7, CD10 and mesothelin in distinguishing ovarian clear cell carcinoma from metastasis of renal clear cell carcinoma.			Pubmed	7.27e-05	1	0.00365	0.04	2	3	MME,KRT7
Pubmed	23943793	Elevated FGF21 secretion, PGC-1? and ketogenic enzyme expression are hallmarks of iron-sulfur cluster depletion in human skeletal muscle.			Pubmed	7.27e-05	1	0.00365	0.04	2	3	HMGCS2,PPARGC1A
Pubmed	29130968	Immunohistochemical Localization of Calbindin D28k, Parvalbumin, and Calretinin in the Superior Olivary Complex of Circling Mice.			Pubmed	7.27e-05	1	0.00365	0.04	2	3	PVALB,CALB1
Pubmed	25857233	Inhibition effects of Vernonia cinerea active compounds against cytochrome P450 2A6 and human monoamine oxidases, possible targets for reduction of tobacco dependence.			Pubmed	7.27e-05	1	0.00365	0.04	2	3	MAOA,MAOB
Pubmed	16829576	Monoamine oxidase A and repressor R1 are involved in apoptotic signaling pathway.			Pubmed	7.27e-05	1	0.00365	0.04	2	3	MAOA,MAOB
Pubmed	16494845	The region of CQQQKPQRRP of PGC-1alpha interacts with the DNA-binding complex of FXR/RXRalpha.			Pubmed	7.27e-05	1	0.00365	0.04	2	3	PPARGC1A,NR1H4
Pubmed	11717447	Cubilin dysfunction causes abnormal metabolism of the steroid hormone 25(OH) vitamin D(3).			Pubmed	7.27e-05	1	0.00365	0.04	2	3	CUBN,LRP2
Pubmed	24497636	Serotonin receptor 6 mediates defective brain development in monoamine oxidase A-deficient mouse embryos.			Pubmed	7.27e-05	1	0.00365	0.04	2	3	MAOA,MAOB
Pubmed	30637799	ErbB receptor signaling directly controls oligodendrocyte progenitor cell transformation and spontaneous remyelination after spinal cord injury.			Pubmed	7.27e-05	1	0.00365	0.04	2	3	ERBB3,ERBB4
Pubmed	20826316	Broadly tuned response properties of diverse inhibitory neuron subtypes in mouse visual cortex.			Pubmed	7.27e-05	1	0.00365	0.04	2	3	GAD1,PVALB
Pubmed	30647093	Integration of Genetic Testing and Pathology for the Diagnosis of Adults with FSGS.			Pubmed	7.27e-05	1	0.00365	0.04	2	3	COL4A3,COL4A4
Pubmed	9851845	erbB genes in the mouse uterus: cell-specific signaling by epidermal growth factor (EGF) family of growth factors during implantation.			Pubmed	7.27e-05	1	0.00365	0.04	2	3	ERBB3,ERBB4
Pubmed	28973302	Pseudoexfoliation and Alzheimer's associated CLU risk variant, rs2279590, lies within an enhancer element and regulates CLU, EPHX2 and PTK2B gene expression.			Pubmed	7.27e-05	1	0.00365	0.04	2	3	EPHX2,CLU
Pubmed	23740519	Enzymes of urea synthesis are expressed at the ocular surface, and decreased urea in the tear fluid is associated with dry-eye syndrome.			Pubmed	7.27e-05	1	0.00365	0.04	2	3	ARG2,AGMAT
Pubmed	12039968	Determinants of vascular permeability in the kidney glomerulus.			Pubmed	7.27e-05	1	0.00365	0.04	2	3	NPHS1,COL4A3
Pubmed	28467898	Distinct Corticostriatal GABAergic Neurons Modulate Striatal Output Neurons and Motor Activity.			Pubmed	7.27e-05	1	0.00365	0.04	2	3	GAD1,PVALB
Pubmed	21926402	Mouse model of proximal tubule endocytic dysfunction.			Pubmed	7.27e-05	1	0.00365	0.04	2	3	CUBN,LRP2
Pubmed	29186471	Reduced proximal tubular expression of protein endocytic receptors in proteinuria is associated with urinary receptor shedding.			Pubmed	7.27e-05	1	0.00365	0.04	2	3	CUBN,LRP2
Pubmed	25691754	EF-hand protein Ca2+ buffers regulate Ca2+ influx and exocytosis in sensory hair cells.			Pubmed	7.27e-05	1	0.00365	0.04	2	3	PVALB,CALB1
Pubmed	27821364	Modification of the association between early adversity and obsessive-compulsive disorder by polymorphisms in the MAOA, MAOB and COMT genes.			Pubmed	7.27e-05	1	0.00365	0.04	2	3	MAOA,MAOB
Pubmed	8041507	Activities of monoamine oxidase-A and -B are altered in the brains of congenitally hyperammonemic sparse-fur (spf) mice.			Pubmed	7.27e-05	1	0.00365	0.04	2	3	MAOA,MAOB
Pubmed	9305636	Bivalence of EGF-like ligands drives the ErbB signaling network.			Pubmed	7.27e-05	1	0.00365	0.04	2	3	ERBB3,EGF
Pubmed	18359574	Cerebellar network plasticity: from genes to fast oscillation.			Pubmed	7.27e-05	1	0.00365	0.04	2	3	PVALB,CALB1
Pubmed	23542467	HER2 mediates epidermal growth factor-induced down-regulation of E-cadherin in human ovarian cancer cells.			Pubmed	7.27e-05	1	0.00365	0.04	2	3	EGF,CDH1
Pubmed	23867472	Rapid induction of lung adenocarcinoma by fibroblast growth factor 9 signaling through FGF receptor 3.			Pubmed	7.27e-05	1	0.00365	0.04	2	3	FGF9,FGFR3
Pubmed	17697999	Ligand-induced structural transitions in ErbB receptor extracellular domains.			Pubmed	7.27e-05	1	0.00365	0.04	2	3	ERBB3,EGF
Pubmed	31608978	Cell-autonomous impact of polysialic acid-producing enzyme ST8SIA2 on developmental migration and distribution of cortical interneurons.			Pubmed	7.27e-05	1	0.00365	0.04	2	3	PVALB,CALB1
Pubmed	28233610	The genetic and clinical spectrum of a large cohort of patients with distal renal tubular acidosis.			Pubmed	7.27e-05	1	0.00365	0.04	2	3	SLC4A1,ATP6V0A4
Pubmed	12416993	Hepatocyte nuclear factor-4 alpha mediates the stimulatory effect of peroxisome proliferator-activated receptor gamma co-activator-1 alpha (PGC-1 alpha) on glucose-6-phosphatase catalytic subunit gene transcription in H4IIE cells.			Pubmed	7.27e-05	1	0.00365	0.04	2	3	PPARGC1A,G6PC1
Pubmed	28304405	The ErbB3 receptor tyrosine kinase negatively regulates Paneth cells by PI3K-dependent suppression of Atoh1.			Pubmed	7.27e-05	1	0.00365	0.04	2	3	ERBB3,ERBB4
Pubmed	18455532	Proteomic techniques identify urine proteins that differentiate patients with interstitial cystitis from asymptomatic control subjects.			Pubmed	7.27e-05	1	0.00365	0.04	2	3	UMOD,KNG1
Pubmed	21106764	ErbB4 in parvalbumin-positive interneurons is critical for neuregulin 1 regulation of long-term potentiation.			Pubmed	7.27e-05	1	0.00365	0.04	2	3	ERBB4,PVALB
Pubmed	10811843	Cubilin is an albumin binding protein important for renal tubular albumin reabsorption.			Pubmed	7.27e-05	1	0.00365	0.04	2	3	CUBN,LRP2
Pubmed	15479853	DC-SIGN and DC-SIGNR interact with the glycoprotein of Marburg virus and the S protein of severe acute respiratory syndrome coronavirus.			Pubmed	7.27e-05	1	0.00365	0.04	2	3	CLEC4M,ACE2
Pubmed	12428723	Gender difference in the interaction of smoking and monoamine oxidase B intron 13 genotype in Parkinson's disease.			Pubmed	7.27e-05	1	0.00365	0.04	2	3	MAOA,MAOB
Pubmed	21564312	New evidence for the role of cystathionine beta-synthase in non-syndromic cleft lip with or without cleft palate.			Pubmed	7.27e-05	1	0.00365	0.04	2	3	BHMT,BHMT2
Pubmed	12837682	Interactions of MAP17 with the NaPi-IIa/PDZK1 protein complex in renal proximal tubular cells.			Pubmed	7.27e-05	1	0.00365	0.04	2	3	PDZK1,PDZK1IP1
Pubmed	14512015	Cordon-bleu is a conserved gene involved in neural tube formation.			Pubmed	7.27e-05	1	0.00365	0.04	2	3	COBL,COBLL1
Pubmed	7559606	Transcription factor AP-2 regulates human insulin-like growth factor binding protein-5 gene expression.			Pubmed	7.27e-05	1	0.00365	0.04	2	3	TFAP2A,TFAP2B
Pubmed	21733854	DNA damage induces down-regulation of PEPCK and G6P gene expression through degradation of PGC-1alpha.			Pubmed	7.27e-05	1	0.00365	0.04	2	3	PPARGC1A,G6PC1
Pubmed	15211623	Polymorphisms in the MAOA, MAOB, and COMT genes and aggressive behavior in schizophrenia.			Pubmed	7.27e-05	1	0.00365	0.04	2	3	MAOA,MAOB
Pubmed	18673300	PGC-1alpha induces dynamic protein interactions on the ERRalpha gene multi-hormone response element nucleosome in kidney cells.			Pubmed	7.27e-05	1	0.00365	0.04	2	3	ESRRG,PPARGC1A
Pubmed	23106396	Amyloid-? oligomers are sequestered by both intracellular and extracellular chaperones.			Pubmed	7.27e-05	1	0.00365	0.04	2	3	CLU,CRYAB
Pubmed	3089234	Collagen types in various layers of the human aorta and their changes with the atherosclerotic process.			Pubmed	7.27e-05	1	0.00365	0.04	2	3	COL4A3,COL4A4
Pubmed	23549084	Hepatic glucose sensing is required to preserve ? cell glucose competence.			Pubmed	7.27e-05	1	0.00365	0.04	2	3	NR1H4,SLC2A2
Pubmed	28542346	Novel mutations in COL4A3, COL4A4, and COL4A5 in Chinese patients with Alport Syndrome.			Pubmed	7.27e-05	1	0.00365	0.04	2	3	COL4A3,COL4A4
Pubmed	15821111	Estrogen-related receptor-gamma and peroxisome proliferator-activated receptor-gamma coactivator-1alpha regulate estrogen-related receptor-alpha gene expression via a conserved multi-hormone response element.			Pubmed	7.27e-05	1	0.00365	0.04	2	3	ESRRG,PPARGC1A
Pubmed	16968782	beta-Arrestin2 mediates nephrin endocytosis and impairs slit diaphragm integrity.			Pubmed	7.27e-05	1	0.00365	0.04	2	3	NPHS2,NPHS1
Pubmed	16968734	Genetics and clinical features of 15 Asian families with steroid-resistant nephrotic syndrome.			Pubmed	7.27e-05	1	0.00365	0.04	2	3	NPHS2,NPHS1
Pubmed	22891299	Dynamically varying interactions between heregulin and ErbB proteins detected by single-molecule analysis in living cells.			Pubmed	7.27e-05	1	0.00365	0.04	2	3	ERBB3,ERBB4
Pubmed	18930919	Identification of noncollagenous sites encoding specific interactions and quaternary assembly of alpha 3 alpha 4 alpha 5(IV) collagen: implications for Alport gene therapy.			Pubmed	7.27e-05	1	0.00365	0.04	2	3	COL4A3,COL4A4
Pubmed	7689552	Characterization of a breast cancer cell differentiation factor that specifically activates the HER4/p180erbB4 receptor.			Pubmed	7.27e-05	1	0.00365	0.04	2	3	ERBB3,ERBB4
Pubmed	16787536	Targeted disruption of cubilin reveals essential developmental roles in the structure and function of endoderm and in somite formation.			Pubmed	7.27e-05	1	0.00365	0.04	2	3	CUBN,LRP2
Pubmed	16978381	Large-scale study of the -232C > G polymorphism of PCK1 in Type 2 diabetes.			Pubmed	7.27e-05	1	0.00365	0.04	2	3	PPARGC1A,PCK1
Pubmed	23395558	Expression and potential role of ErbB receptors in type II endometrial cancer.			Pubmed	7.27e-05	1	0.00365	0.04	2	3	ERBB3,ERBB4
Pubmed	17979745	Multiligand endocytosis and congenital defects: roles of cubilin, megalin and amnionless.			Pubmed	7.27e-05	1	0.00365	0.04	2	3	CUBN,LRP2
Pubmed	29504253	Interplay between Porphyromonas gingivalis and EGF signalling in the regulation of CXCL14.			Pubmed	7.27e-05	1	0.00365	0.04	2	3	CXCL14,EGF
Pubmed	20301386	Alport Syndrome and Thin Basement Membrane Nephropathy			Pubmed	7.27e-05	1	0.00365	0.04	2	3	COL4A3,COL4A4
Pubmed	28684271	Ablating ErbB4 in PV neurons attenuates synaptic and cognitive deficits in an animal model of Alzheimer's disease.			Pubmed	7.27e-05	1	0.00365	0.04	2	3	ERBB4,PVALB
Pubmed	30806528	Low endometrial beta-catenin and cadherins expression patterns are predictive for primary infertility and recurrent pregnancy loss.			Pubmed	7.27e-05	1	0.00365	0.04	2	3	CDH1,CDH6
Pubmed	9758708	A novel alternative spliced variant of the transcription factor AP2alpha is expressed in the murine ocular lens.			Pubmed	7.27e-05	1	0.00365	0.04	2	3	TFAP2A,TFAP2B
Pubmed	11793338	Developmental expression of monoamine oxidases A and B in the central and peripheral nervous systems of the mouse.			Pubmed	7.27e-05	1	0.00365	0.04	2	3	MAOA,MAOB
Pubmed	30458709	Targeted gene panel for genetic testing of south Indian children with steroid resistant nephrotic syndrome.			Pubmed	7.27e-05	1	0.00365	0.04	2	3	NPHS2,NPHS1
Pubmed	20080551	Neuregulin 1 regulates pyramidal neuron activity via ErbB4 in parvalbumin-positive interneurons.			Pubmed	7.27e-05	1	0.00365	0.04	2	3	ERBB4,PVALB
Pubmed	11278724	A two-receptor pathway for catabolism of Clara cell secretory protein in the kidney.			Pubmed	7.27e-05	1	0.00365	0.04	2	3	CUBN,LRP2
Pubmed	11553286	Developmental regulation and overexpression of the transcription factor AP-2, a potential regulator of the timing of Schwann cell generation.			Pubmed	7.27e-05	1	0.00365	0.04	2	3	TFAP2A,TFAP2B
Pubmed	21125408	Novel mutations in steroid-resistant nephrotic syndrome diagnosed in Tunisian children.			Pubmed	7.27e-05	1	0.00365	0.04	2	3	NPHS2,NPHS1
Pubmed	9516479	Analysis of Grb7 recruitment by heregulin-activated erbB receptors reveals a novel target selectivity for erbB3.			Pubmed	7.27e-05	1	0.00365	0.04	2	3	ERBB3,ERBB4
Pubmed	24093454	Impaired endocytosis in proximal tubule from subchronic exposure to cadmium involves angiotensin II type 1 and cubilin receptors.			Pubmed	7.27e-05	1	0.00365	0.04	2	3	CUBN,LRP2
Pubmed	29514081	ERR? Promotes Angiogenesis, Mitochondrial Biogenesis, and Oxidative Remodeling in PGC1?/?-Deficient Muscle.			Pubmed	7.27e-05	1	0.00365	0.04	2	3	ESRRG,PPARGC1A
Pubmed	31146816	Osteopontin Promotes Left Ventricular Diastolic Dysfunction Through a Mitochondrial Pathway.			Pubmed	7.27e-05	1	0.00365	0.04	2	3	COL4A3,OGDHL
Pubmed	12961083	Expression of nephrin, podocin, alpha-actinin, and WT1 in children with nephrotic syndrome.			Pubmed	7.27e-05	1	0.00365	0.04	2	3	NPHS2,NPHS1
Pubmed	27322419	The mouse cortico-striatal projectome.			Pubmed	7.27e-05	1	0.00365	0.04	2	3	MAOA,MAOB
Pubmed	9565587	Binding interaction of the heregulinbeta egf domain with ErbB3 and ErbB4 receptors assessed by alanine scanning mutagenesis.			Pubmed	7.27e-05	1	0.00365	0.04	2	3	ERBB3,ERBB4
Pubmed	33460639	Anomalous incisor morphology indicates tissue-specific roles for Tfap2a and Tfap2b in tooth development.			Pubmed	7.27e-05	1	0.00365	0.04	2	3	TFAP2A,TFAP2B
Pubmed	14528024	Klotho, a gene related to a syndrome resembling human premature aging, functions in a negative regulatory circuit of vitamin D endocrine system.			Pubmed	7.27e-05	1	0.00365	0.04	2	3	CYP24A1,KL
Pubmed	19302533	Immunohistochemical stain for cytokeratin 7, S100A1 and claudin 8 is valuable in differential diagnosis of chromophobe renal cell carcinoma from renal oncocytoma.			Pubmed	7.27e-05	1	0.00365	0.04	2	3	KRT7,CLDN8
Pubmed	26081613	Calcium-binding proteins in focal cortical dysplasia.			Pubmed	7.27e-05	1	0.00365	0.04	2	3	PVALB,CALB1
Pubmed	25731189	Protein expression of HER2, 3, 4 in gastric cancer: correlation with clinical features and survival.			Pubmed	7.27e-05	1	0.00365	0.04	2	3	ERBB3,ERBB4
Pubmed	18075467	Genetic regulation of dihydropyrimidinase and its possible implication in altered uracil catabolism.			Pubmed	7.27e-05	1	0.00365	0.04	2	3	UPB1,DPYS
Pubmed	26839369	Quantification of Flavin-containing Monooxygenases 1, 3, and 5 in Human Liver Microsomes by UPLC-MRM-Based Targeted Quantitative Proteomics and Its Application to the Study of Ontogeny.			Pubmed	7.27e-05	1	0.00365	0.04	2	3	FMO1,FMO5
Pubmed	17611227	Helt determines GABAergic over glutamatergic neuronal fate by repressing Ngn genes in the developing mesencephalon.			Pubmed	7.69e-05	1	0.00382	0.0417	3	17	GAD1,SIM1,LHX1
Pubmed	30146317	The Evf2 Ultraconserved Enhancer lncRNA Functionally and Spatially Organizes Megabase Distant Genes in the Developing Forebrain.			Pubmed	7.69e-05	1	0.00382	0.0417	3	17	GAD1,PVALB,CALB1
Pubmed	20507551	Sonic hedgehog expressing and responding cells generate neuronal diversity in the medial amygdala.			Pubmed	7.69e-05	1	0.00382	0.0417	3	17	GAD1,PVALB,CALB1
Pubmed	20300111	Jun and JunD-dependent functions in cell proliferation and stress response.			Pubmed	7.69e-05	1	0.00382	0.0417	3	17	ERBB3,ERBB4,NOX4
Pubmed	21466690	Sequential generation of olfactory bulb glutamatergic neurons by Neurog2-expressing precursor cells.			Pubmed	7.69e-05	1	0.00382	0.0417	3	17	GAD1,PVALB,CALB1
Pubmed	22578469	Impaired motor coordination and disrupted cerebellar architecture in Fgfr1 and Fgfr2 double knockout mice.			Pubmed	7.69e-05	1	0.00382	0.0417	3	17	GAD1,PVALB,CALB1
Pubmed	23292680	Dual origins of the mammalian accessory olfactory bulb revealed by an evolutionarily conserved migratory stream.			Pubmed	7.69e-05	1	0.00382	0.0417	3	17	GAD1,TFAP2A,EMX2
Pubmed	18653561	Fgf8 controls regional identity in the developing thalamus.			Pubmed	7.69e-05	1	0.00382	0.0417	3	17	GAD1,FGFR3,CDH6
Pubmed	15533830	Using real time RT-PCR analysis to determine multiple gene expression patterns during XX and XY mouse fetal gonad development.			Pubmed	8.04e-05	1	0.00398	0.0435	4	46	FGF9,SOSTDC1,REN,EMX2
Pubmed	22516433	Proteomic analysis of microvesicles from plasma of healthy donors reveals high individual variability.			Pubmed	8.24e-05	1	0.00408	0.0446	6	143	CLU,AFM,FGB,PLG,KNG1,SLC4A1
Pubmed	24529757	Genome-wide association study combining pathway analysis for typical sporadic amyotrophic lateral sclerosis in Chinese Han populations.			Pubmed	8.33e-05	1	0.00411	0.0449	5	89	ERBB4,TYRP1,FGF9,ANXA3,TFAP2A
Pubmed	19439493	Inhibitory and excitatory subtypes of cochlear nucleus neurons are defined by distinct bHLH transcription factors, Ptf1a and Atoh1.			Pubmed	9.2e-05	1	0.00445	0.0487	3	18	GAD1,PVALB,CALB1
Pubmed	10567358	The epsins define a family of proteins that interact with components of the clathrin coat and contain a new protein module.			Pubmed	9.2e-05	1	0.00445	0.0487	3	18	SH3GL2,TFAP2A,EGF
Pubmed	12421703	The early topography of thalamocortical projections is shifted in Ebf1 and Dlx1/2 mutant mice.			Pubmed	9.2e-05	1	0.00445	0.0487	3	18	FGFR3,EMX2,CDH6
Pubmed	32901292	LRP2 controls sonic hedgehog-dependent differentiation of cardiac progenitor cells during outflow tract formation.			Pubmed	9.2e-05	1	0.00445	0.0487	3	18	TFAP2A,LRP2,CDH1
Pubmed	28009292	TGF-? Signaling in Dopaminergic Neurons Regulates Dendritic Growth, Excitatory-Inhibitory Synaptic Balance, and Reversal Learning.			Pubmed	9.2e-05	1	0.00445	0.0487	3	18	GAD1,PVALB,CALB1
Pubmed	17913789	Divergent roles of ApoER2 and Vldlr in the migration of cortical neurons.			Pubmed	9.2e-05	1	0.00445	0.0487	3	18	GAD1,PVALB,CALB1
Pubmed	20660060	Absence of thyroid hormone activation during development underlies a permanent defect in adaptive thermogenesis.			Pubmed	9.2e-05	1	0.00445	0.0487	3	18	PPARGC1A,GPX3,TFAP2A
Pubmed	22326222	Imprinted gene dosage is critical for the transition to independent life.			Pubmed	9.2e-05	1	0.00445	0.0487	3	18	PPARGC1A,DIO1,PCK1
Pubmed	16606357	Expression and distribution of JNK/SAPK-associated scaffold protein JSAP1 in developing and adult mouse brain.			Pubmed	9.2e-05	1	0.00445	0.0487	3	18	GAD1,PVALB,CALB1
Pubmed	10049364	Inactivation of the winged helix transcription factor HNF3alpha affects glucose homeostasis and islet glucagon gene expression in vivo.			Pubmed	9.2e-05	1	0.00445	0.0487	3	18	SLC2A2,G6PC1,PCK1
Pubmed	12588844	BDNF regulates spontaneous correlated activity at early developmental stages by increasing synaptogenesis and expression of the K+/Cl- co-transporter KCC2.			Pubmed	9.2e-05	1	0.00445	0.0487	3	18	GAD1,CALB1,GABRA2
Pubmed	25794677	Onecut1 and Onecut2 transcription factors operate downstream of Pax6 to regulate horizontal cell development.			Pubmed	9.2e-05	1	0.00445	0.0487	3	18	CALB1,TFAP2A,LHX1
Pubmed	29058721	EGFR signalling controls cellular fate and pancreatic organogenesis by regulating apicobasal polarity.			Pubmed	9.2e-05	1	0.00445	0.0487	3	18	ERBB4,EGF,CDH1
Pubmed	27689697	Mtu1-Mediated Thiouridine Formation of Mitochondrial tRNAs Is Required for Mitochondrial Translation and Is Involved in Reversible Infantile Liver Injury.			Pubmed	9.25e-05	1	0.00447	0.0489	5	91	EPHX2,HMGCS2,PPARGC1A,GPX3,G6PC1
Pubmed	20346360	Genetic risk factors for hepatopulmonary syndrome in patients with advanced liver disease.			Pubmed	0.000108	1	0.0052	0.0569	5	94	BHMT,PLG,NR1H4,NOX4,SLC10A2
Pubmed	16319112	Pax 2/8-regulated Gata 3 expression is necessary for morphogenesis and guidance of the nephric duct in the developing kidney.			Pubmed	0.000109	1	0.0052	0.0569	3	19	SIM1,EMX2,CDH1
Pubmed	21844226	Deregulation of the p57-E2F1-p53 axis results in nonobstructive hydrocephalus and cerebellar malformation in mice.			Pubmed	0.000109	1	0.0052	0.0569	3	19	PVALB,CALB1,LHX1
Pubmed	28981617	Transcription Factors Sp8 and Sp9 Coordinately Regulate Olfactory Bulb Interneuron Development.			Pubmed	0.000109	1	0.0052	0.0569	3	19	GAD1,PVALB,CALB1
Pubmed	21508241	Robo1 regulates semaphorin signaling to guide the migration of cortical interneurons through the ventral forebrain.			Pubmed	0.000109	1	0.0052	0.0569	3	19	GAD1,PVALB,CALB1
Pubmed	30040984	NRG1 signalling regulates the establishment of Sertoli cell stock in the mouse testis.			Pubmed	0.000109	1	0.0052	0.0569	3	19	ERBB3,FGF9,CDH1
Pubmed	19841136	Keratins regulate protein biosynthesis through localization of GLUT1 and -3 upstream of AMP kinase and Raptor.			Pubmed	0.000109	1	0.0052	0.0569	3	19	KRT7,SLC2A2,CDH1
Pubmed	11752298	The human (PEDB) and mouse (mPEDB) Prostate Expression Databases.			Pubmed	0.000114	1	0.00541	0.0592	5	95	PVALB,RNF128,ARG2,PDZK1IP1,TSPAN8
Pubmed	19625176	PTEN identified as important risk factor of chronic obstructive pulmonary disease.			Pubmed	0.000117	1	0.00555	0.0607	9	376	EPHX2,CYP24A1,BHMT,DIO1,HSD17B2,NR1H4,GPX3,EGF,CDH1
Pubmed	25037231	Extracellular matrix signatures of human primary metastatic colon cancers and their metastases to liver.			Pubmed	0.00012	1	0.00569	0.0622	6	153	SBSPON,FGB,PLG,KNG1,COL4A3,COL4A4
Pubmed	23012479	Impact of lactobacilli on orally acquired listeriosis.			Pubmed	0.000125	1	0.00583	0.0637	5	97	GPM6A,CUBN,SLC10A2,CDH1,PCK1
Pubmed	17067568	CYP26A1 and CYP26C1 cooperatively regulate anterior-posterior patterning of the developing brain and the production of migratory cranial neural crest cells in the mouse.			Pubmed	0.000128	1	0.00583	0.0637	3	20	TFAP2A,EMX2,CDH1
Pubmed	10932192	Genome-wide, large-scale production of mutant mice by ENU mutagenesis.			Pubmed	0.000128	1	0.00583	0.0637	3	20	SLC26A4,FGF9,TFAP2A
Pubmed	23824729	Common genetic loci influencing plasma homocysteine concentrations and their effect on risk of coronary artery disease.			Pubmed	0.000128	1	0.00583	0.0637	3	20	SLC17A3,NOX4,CUBN
Pubmed	18430798	Loss of Hoxb8 alters spinal dorsal laminae and sensory responses in mice.			Pubmed	0.000128	1	0.00583	0.0637	3	20	GAD1,PVALB,CALB1
Pubmed	24776795	Astrocyte-encoded positional cues maintain sensorimotor circuit integrity.			Pubmed	0.000128	1	0.00583	0.0637	3	20	ESRRG,PVALB,CALB1
Pubmed	30348983	Chromatin-remodeling factor, RSF1, controls p53-mediated transcription in apoptosis upon DNA strand breaks.			Pubmed	0.000128	1	0.00583	0.0637	3	20	GAD1,PVALB,CALB1
Pubmed	19715689	The murine Fgfrl1 receptor is essential for the development of the metanephric kidney.			Pubmed	0.000128	1	0.00583	0.0637	3	20	CALB1,LHX1,EMX2
Pubmed	27146480	Cholesterol 7?-hydroxylase-deficient mice are protected from high-fat/high-cholesterol diet-induced metabolic disorders.			Pubmed	0.000128	1	0.00583	0.0637	3	20	NR1H4,SLC10A2,G6PC1
Pubmed	18291621	Appearance of new tetraspanin genes during vertebrate evolution.			Pubmed	0.000128	1	0.00583	0.0637	3	20	TSPAN12,TSPAN1,TSPAN8
Pubmed	24453340	Involvement of Bcl-2-associated transcription factor 1 in the differentiation of early-born retinal cells.			Pubmed	0.000128	1	0.00583	0.0637	3	20	CALB1,TFAP2A,LHX1
Pubmed	14660441	Global expression analysis of gene regulatory pathways during endocrine pancreatic development.			Pubmed	0.00013	1	0.00583	0.0637	4	52	PDZK1,CUBN,LHX1,TSPAN8
Pubmed	23382219	Structural basis for endosomal trafficking of diverse transmembrane cargos by PX-FERM proteins.			Pubmed	0.000131	1	0.00583	0.0637	5	98	ERBB3,ERBB4,NR3C2,MTTP,LRP2
Pubmed	19086053	Identification of new putative susceptibility genes for several psychiatric disorders by association analysis of regulatory and non-synonymous SNPs of 306 genes involved in neurotransmission and neurodevelopment.			Pubmed	0.000137	1	0.00583	0.0637	8	301	GAD1,MAOA,MAOB,NR3C2,KNG1,NLGN1,EGF,GABRA2
Pubmed	27210758	Two Pairs of ON and OFF Retinal Ganglion Cells Are Defined by Intersectional Patterns of Transcription Factor Expression.			Pubmed	0.000141	1	0.00583	0.0637	4	53	PVALB,CALB1,TFAP2A,CDH6
Pubmed	7827955	Nature and the multiple functions of the 67-kD elastin-/laminin binding protein.			Pubmed	0.000145	1	0.00583	0.0637	2	4	COL4A3,COL4A4
Pubmed	24557338	Characterisation of HER heterodimers in breast cancer using in situ proximity ligation assay.			Pubmed	0.000145	1	0.00583	0.0637	2	4	ERBB3,ERBB4
Pubmed	16674552	Obesity is associated with genetic variants that alter dopamine availability.			Pubmed	0.000145	1	0.00583	0.0637	2	4	MAOA,MAOB
Pubmed	12820171	Cerebellar granule cell Cre recombinase expression.			Pubmed	0.000145	1	0.00583	0.0637	2	4	GAD1,PVALB
Pubmed	23991224	Inverse regulation of EGFR/HER1 and HER2-4 in normal and malignant human breast tissue.			Pubmed	0.000145	1	0.00583	0.0637	2	4	ERBB3,ERBB4
Pubmed	15023525	Ksp-cadherin is a functional cell-cell adhesion molecule related to LI-cadherin.			Pubmed	0.000145	1	0.00583	0.0637	2	4	CDH1,CDH16
Pubmed	11425901	Neuregulin signaling regulates neural precursor growth and the generation of oligodendrocytes in vitro.			Pubmed	0.000145	1	0.00583	0.0637	2	4	ERBB3,ERBB4
Pubmed	24618690	Selective loss of parvalbumin-positive GABAergic interneurons in the cerebral cortex of maternally stressed Gad1-heterozygous mouse offspring.			Pubmed	0.000145	1	0.00583	0.0637	2	4	GAD1,PVALB
Pubmed	26648299	[Neuregulin-1 promotes proliferation and migration of human coronary artery smooth muscle cells by enhancing its receptor phosphorylation].			Pubmed	0.000145	1	0.00583	0.0637	2	4	ERBB3,ERBB4
Pubmed	15780077	Analysis of NPHS1, NPHS2, ACTN4, and WT1 in Japanese patients with congenital nephrotic syndrome.			Pubmed	0.000145	1	0.00583	0.0637	2	4	NPHS2,NPHS1
Pubmed	22378872	The importance of the NRG-1/ErbB4 pathway for synaptic plasticity and behaviors associated with psychiatric disorders.			Pubmed	0.000145	1	0.00583	0.0637	2	4	ERBB4,PVALB
Pubmed	27369075	Involvement of the MEK/ERK pathway in EGF-induced E-cadherin down-regulation.			Pubmed	0.000145	1	0.00583	0.0637	2	4	EGF,CDH1
Pubmed	21306299	Trans-interaction of nephrin and Neph1/Neph3 induces cell adhesion that associates with decreased tyrosine phosphorylation of nephrin.			Pubmed	0.000145	1	0.00583	0.0637	2	4	NPHS2,NPHS1
Pubmed	32766577	SARS-CoV-2 Spike Protein Interacts with Multiple Innate Immune Receptors.			Pubmed	0.000145	1	0.00583	0.0637	2	4	CLEC4M,ACE2
Pubmed	22327010	Expression of epidermal growth factors, erbBs, in the nasal mucosa of patients with chronic hypertrophic rhinitis.			Pubmed	0.000145	1	0.00583	0.0637	2	4	ERBB3,ERBB4
Pubmed	24856380	Retrospective mutational analysis of NPHS1, NPHS2, WT1 and LAMB2 in children with steroid-resistant focal segmental glomerulosclerosis - a single-centre experience.			Pubmed	0.000145	1	0.00583	0.0637	2	4	NPHS2,NPHS1
Pubmed	17177598	Epidermal growth factor receptor activation in glioblastoma through novel missense mutations in the extracellular domain.			Pubmed	0.000145	1	0.00583	0.0637	2	4	ERBB3,ERBB4
Pubmed	18718911	Epigenetic regulation of HYAL-1 hyaluronidase expression. identification of HYAL-1 promoter.			Pubmed	0.000145	1	0.00583	0.0637	2	4	HYAL1,TFAP2A
Pubmed	9933568	Cloning of the mouse and human solute carrier 22a3 (Slc22a3/SLC22A3) identifies a conserved cluster of three organic cation transporters on mouse chromosome 17 and human 6q26-q27.			Pubmed	0.000145	1	0.00583	0.0637	2	4	PLG,SLC22A2
Pubmed	9135143	Activation of HER4 by heparin-binding EGF-like growth factor stimulates chemotaxis but not proliferation.			Pubmed	0.000145	1	0.00583	0.0637	2	4	ERBB4,EGF
Pubmed	17371932	Nephrotic syndrome in the first year of life: two thirds of cases are caused by mutations in 4 genes (NPHS1, NPHS2, WT1, and LAMB2).			Pubmed	0.000145	1	0.00583	0.0637	2	4	NPHS2,NPHS1
Pubmed	21203579	HER2 phosphorylation is maintained by a PKB negative feedback loop in response to anti-HER2 herceptin in breast cancer.			Pubmed	0.000145	1	0.00583	0.0637	2	4	ERBB3,ERBB4
Pubmed	14645497	Deoxyribonucleic acid response element-dependent regulation of transcription by orphan nuclear receptor estrogen receptor-related receptor gamma.			Pubmed	0.000145	1	0.00583	0.0637	2	4	ESRRG,PPARGC1A
Pubmed	21829553	A heart-hand syndrome gene: Tfap2b plays a critical role in the development and remodeling of mouse ductus arteriosus and limb patterning.			Pubmed	0.000145	1	0.00583	0.0637	2	4	TFAP2A,TFAP2B
Pubmed	23651543	Maternal-fetal transfer of selenium in the mouse.			Pubmed	0.000145	1	0.00583	0.0637	2	4	GPX3,LRP2
Pubmed	16501493	The relationship among nephrin, podocin, CD2AP, and alpha-actinin might not be a true 'interaction' in podocyte.			Pubmed	0.000145	1	0.00583	0.0637	2	4	NPHS2,NPHS1
Pubmed	24325792	The distinct expression patterns of claudin-10, -14, -17 and E-cadherin between adjacent non-neoplastic tissues and gastric cancer tissues.			Pubmed	0.000145	1	0.00583	0.0637	2	4	CLDN10,CDH1
Pubmed	22158511	Neuregulin 1 regulates excitability of fast-spiking neurons through Kv1.1 and acts in epilepsy.			Pubmed	0.000145	1	0.00583	0.0637	2	4	ERBB4,PVALB
Pubmed	19096086	Phenotype-genotype correlation in antenatal and neonatal variants of Bartter syndrome.			Pubmed	0.000145	1	0.00583	0.0637	2	4	KCNJ1,SLC12A1
Pubmed	16738017	Prorenin receptor blockade inhibits development of glomerulosclerosis in diabetic angiotensin II type 1a receptor-deficient mice.			Pubmed	0.000145	1	0.00583	0.0637	2	4	REN,ACE2
Pubmed	23610411	Renal intercalated cells are rather energized by a proton than a sodium pump.			Pubmed	0.000145	1	0.00583	0.0637	2	4	SLC26A4,SLC4A1
Pubmed	28675393	ErbB4 signaling in the prelimbic cortex regulates fear expression.			Pubmed	0.000145	1	0.00583	0.0637	2	4	ERBB4,PVALB
Pubmed	19447869	Analysis of ErbB receptors in pulmonary carcinoid tumors.			Pubmed	0.000145	1	0.00583	0.0637	2	4	ERBB3,ERBB4
Pubmed	32203543	Differential role of planar cell polarity gene Vangl2 in embryonic and adult mammalian kidneys.			Pubmed	0.000145	1	0.00583	0.0637	2	4	CALB1,CDH1
Pubmed	18985033	Evaluation of the prognostic and predictive value of HER family mRNA expression in high-risk early breast cancer: a Hellenic Cooperative Oncology Group (HeCOG) study.			Pubmed	0.000145	1	0.00583	0.0637	2	4	ERBB3,ERBB4
Pubmed	14534538	The phosphotyrosine phosphatase SHP2 is a critical mediator of transformation induced by the oncogenic fibroblast growth factor receptor 3.			Pubmed	0.000145	1	0.00583	0.0637	2	4	KL,FGF9
Pubmed	19115315	The interaction of KCTD1 with transcription factor AP-2alpha inhibits its transactivation.			Pubmed	0.000145	1	0.00583	0.0637	2	4	TFAP2A,TFAP2B
Pubmed	15283675	Evaluation of angiotensin-converting enzyme (ACE), its homologue ACE2 and neprilysin in angiotensin peptide metabolism.			Pubmed	0.000145	1	0.00583	0.0637	2	4	MME,ACE2
Pubmed	17203182	Induction of alpha2-antiplasmin inhibits E-cadherin processing mediated by the plasminogen activator/plasmin system, leading to suppression of progression of oral squamous cell carcinoma via upregulation of cell-cell adhesion.			Pubmed	0.000145	1	0.00583	0.0637	2	4	PLG,CDH1
Pubmed	18593907	Inhibition of fibroblast growth factor 19 reduces tumor growth by modulating beta-catenin signaling.			Pubmed	0.000145	1	0.00583	0.0637	2	4	FGF9,CDH1
Pubmed	12093292	Role of the N-terminus of epidermal growth factor in ErbB-2/ErbB-3 binding studied by phage display.			Pubmed	0.000145	1	0.00583	0.0637	2	4	ERBB3,EGF
Pubmed	20943952	Cell death or survival promoted by alternative isoforms of ErbB4.			Pubmed	0.000145	1	0.00583	0.0637	2	4	ERBB4,TFAP2A
Pubmed	20204273	Expression of the HER-1-4 family of receptor tyrosine kinases in neuroendocrine tumours.			Pubmed	0.000145	1	0.00583	0.0637	2	4	ERBB3,ERBB4
Pubmed	19091402	Regulation of protein expression and function of octn2 in forskolin-induced syncytialization in BeWo Cells.			Pubmed	0.000145	1	0.00583	0.0637	2	4	PDZK1,SLC22A5
Pubmed	21775056	Immunohistochemical evaluation of solid pseudopapillary tumors of the pancreas: the expression pattern of CD99 is highly unique.			Pubmed	0.000145	1	0.00583	0.0637	2	4	MME,CDH1
Pubmed	17339320	Disabled-2 is an epithelial surface positioning gene.			Pubmed	0.000145	1	0.00583	0.0637	2	4	LRP2,CDH1
Pubmed	20127808	Aggressive behavior, related conduct problems, and variation in genes affecting dopamine turnover.			Pubmed	0.000145	1	0.00583	0.0637	2	4	MAOA,MAOB
Pubmed	28237360	Involvement of WNK1-mediated potassium channels in the sexual dimorphism of blood pressure.			Pubmed	0.000145	1	0.00583	0.0637	2	4	KCNJ1,SLC12A1
Pubmed	18843039	The AP-2 adaptor beta2 appendage scaffolds alternate cargo endocytosis.			Pubmed	0.000145	1	0.00583	0.0637	2	4	TFAP2A,TFAP2B
Pubmed	27707966	Neuregulin-Dependent Regulation of Fast-Spiking Interneuron Excitability Controls the Timing of the Critical Period.			Pubmed	0.000145	1	0.00583	0.0637	2	4	ERBB4,PVALB
Pubmed	12360111	Polymorphisms in dopamine metabolic enzymes and tobacco consumption in smokers: seeking confirmation of the association in a follow-up study.			Pubmed	0.000145	1	0.00583	0.0637	2	4	MAOA,MAOB
Pubmed	27069134	HER Family Protein Expression in a Greek Population with Gastric Cancer. A Retrospective Hellenic Cooperative Oncology Group Study.			Pubmed	0.000145	1	0.00583	0.0637	2	4	ERBB3,ERBB4
Pubmed	12181319	Peroxisome proliferator-activated receptor coactivator-1alpha (PGC-1alpha) coactivates the cardiac-enriched nuclear receptors estrogen-related receptor-alpha and -gamma. Identification of novel leucine-rich interaction motif within PGC-1alpha.			Pubmed	0.000145	1	0.00583	0.0637	2	4	ESRRG,PPARGC1A
Pubmed	8384496	Binding of urinary protein C inhibitor to fibrin(ogen) and its binding mechanism.			Pubmed	0.000145	1	0.00583	0.0637	2	4	FGB,SERPINA5
Pubmed	11733557	Podocin, a raft-associated component of the glomerular slit diaphragm, interacts with CD2AP and nephrin.			Pubmed	0.000145	1	0.00583	0.0637	2	4	NPHS2,NPHS1
Pubmed	22872862	Atp6v0a4 knockout mouse is a model of distal renal tubular acidosis with hearing loss, with additional extrarenal phenotype.			Pubmed	0.000145	1	0.00583	0.0637	2	4	SLC26A4,ATP6V0A4
Pubmed	9228033	Interaction of apolipoprotein J-amyloid beta-peptide complex with low density lipoprotein receptor-related protein-2/megalin. A mechanism to prevent pathological accumulation of amyloid beta-peptide.			Pubmed	0.000145	1	0.00583	0.0637	2	4	CLU,LRP2
Pubmed	21631963	DNA analysis of renal electrolyte transporter genes among patients suffering from Bartter and Gitelman syndromes: summary of mutation screening.			Pubmed	0.000145	1	0.00583	0.0637	2	4	KCNJ1,SLC12A1
Pubmed	26021752	Evaluation of the prognostic significance of HER family mRNA expression in high-risk early breast cancer: a Hellenic Cooperative Oncology Group (HeCOG) validation study.			Pubmed	0.000145	1	0.00583	0.0637	2	4	ERBB3,ERBB4
Pubmed	16685269	The relation between survival and expression of HER1 and HER2 depends on the expression of HER3 and HER4: a study in bladder cancer patients.			Pubmed	0.000145	1	0.00583	0.0637	2	4	ERBB3,ERBB4
Pubmed	11969252	Ectopic expression of AP-2alpha transcription factor in the lens disrupts fiber cell differentiation.			Pubmed	0.000145	1	0.00583	0.0637	2	4	TFAP2A,CDH1
Pubmed	14701729	Early glomerular filtration defect and severe renal disease in podocin-deficient mice.			Pubmed	0.000145	1	0.00583	0.0637	2	4	NPHS2,NPHS1
Pubmed	20167786	Regulation of cellular metabolism by protein lysine acetylation.			Pubmed	0.000145	1	0.00583	0.0637	2	4	EHHADH,PCK1
Pubmed	9765260	Transcription factor AP-2gamma regulates murine adenosine deaminase gene expression during placental development.			Pubmed	0.000145	1	0.00583	0.0637	2	4	TFAP2A,TFAP2B
Pubmed	18321996	Inhibition of CCN6 (Wnt-1-induced signaling protein 3) down-regulates E-cadherin in the breast epithelium through induction of snail and ZEB1.			Pubmed	0.000145	1	0.00583	0.0637	2	4	CCN6,CDH1
Pubmed	12749383	Regulation of AP-2 and apoptosis in developing eye in a vitamin A-deficiency model.			Pubmed	0.000145	1	0.00583	0.0637	2	4	TFAP2A,TFAP2B
Pubmed	19148499	Expression of heregulin, phosphorylated HER-2, HER-3 and HER-4 in HER-2 negative breast cancers.			Pubmed	0.000145	1	0.00583	0.0637	2	4	ERBB3,ERBB4
Pubmed	30782561	Molecular analysis of APOB, SAR1B, ANGPTL3, and MTTP in patients with primary hypocholesterolemia in a clinical laboratory setting: Evidence supporting polygenicity in mutation-negative patients.			Pubmed	0.000145	1	0.00583	0.0637	2	4	ANGPTL3,MTTP
Pubmed	20576809	Anion exchanger 1 interacts with nephrin in podocytes.			Pubmed	0.000145	1	0.00583	0.0637	2	4	NPHS1,SLC4A1
Pubmed	24434121	Sepp1(UF) forms are N-terminal selenoprotein P truncations that have peroxidase activity when coupled with thioredoxin reductase-1.			Pubmed	0.000145	1	0.00583	0.0637	2	4	GPX3,LRP2
Pubmed	22029643	Changes of renal vitamin D metabolic enzyme expression and calcium transporter abundance in obstructive nephropathy.			Pubmed	0.000145	1	0.00583	0.0637	2	4	CYP24A1,CALB1
Pubmed	16781659	Molecular organization of peroxisomal enzymes: protein-protein interactions in the membrane and in the matrix.			Pubmed	0.000145	1	0.00583	0.0637	2	4	SLC27A2,EHHADH
Pubmed	22253419	Peroxisome proliferator-activated receptors-? and -?, and cAMP-mediated pathways, control retinol-binding protein-4 gene expression in brown adipose tissue.			Pubmed	0.000145	1	0.00583	0.0637	2	4	PPARGC1A,RBP4
Pubmed	12847106	Plakoglobin is O-glycosylated close to the N-terminal destruction box.			Pubmed	0.000145	1	0.00583	0.0637	2	4	DSC1,CDH1
Pubmed	26546820	Islet-specific monoamine oxidase A and B expression depends on MafA transcriptional activity and is compromised in type 2 diabetes.			Pubmed	0.000145	1	0.00583	0.0637	2	4	MAOA,MAOB
Pubmed	19996109	Identification of human plasma proteins as major clients for the extracellular chaperone clusterin.			Pubmed	0.000145	1	0.00583	0.0637	2	4	CLU,FGB
Pubmed	30329159	Ablation of ErbB4 in parvalbumin-positive interneurons inhibits adult hippocampal neurogenesis through down-regulating BDNF/TrkB expression.			Pubmed	0.000145	1	0.00583	0.0637	2	4	ERBB4,PVALB
Pubmed	12115678	Cellular localization and development of neuronal intranuclear inclusions in striatal and cortical neurons in R6/2 transgenic mice.			Pubmed	0.000145	1	0.00583	0.0637	2	4	PVALB,CALB1
Pubmed	12115690	Patterns of expression of calcium binding proteins and neuronal nitric oxide synthase in different populations of hippocampal GABAergic neurons in mice.			Pubmed	0.000145	1	0.00583	0.0637	2	4	PVALB,CALB1
Pubmed	12367519	Hepatocyte nuclear factor 1 alpha controls renal expression of the Npt1-Npt4 anionic transporter locus.			Pubmed	0.000145	1	0.00583	0.0637	2	4	SLC17A3,SLC17A1
Pubmed	15502805	Expression of aquaporins and PAX-2 compared to CD10 and cytokeratin 7 in renal neoplasms: a tissue microarray study.			Pubmed	0.000145	1	0.00583	0.0637	2	4	MME,KRT7
Pubmed	5472365	Studies of a mutation affecting pyrimidine degradation in inbred mice.			Pubmed	0.000145	1	0.00583	0.0637	2	4	UPB1,DPYS
Pubmed	10571691	Skeletal dysplasia and defective chondrocyte differentiation by targeted overexpression of fibroblast growth factor 9 in transgenic mice.			Pubmed	0.000145	1	0.00583	0.0637	2	4	FGF9,FGFR3
Pubmed	20664914	Genetics and clinical characteristics of keratoconus.			Pubmed	0.000145	1	0.00583	0.0637	2	4	COL4A3,COL4A4
Pubmed	26005406	Diversity and overlap of parvalbumin and somatostatin expressing interneurons in mouse presubiculum.			Pubmed	0.000145	1	0.00583	0.0637	2	4	GAD1,PVALB
Pubmed	8723764	Presence of calbindin D28K and GAD67 mRNAs in both orthotopic and ectopic Purkinje cells of staggerer mice suggests that staggerer acts after the onset of cytodifferentiation.			Pubmed	0.000145	1	0.00583	0.0637	2	4	GAD1,CALB1
Pubmed	24950692	Apolipoprotein M modulates erythrocyte efflux and tubular reabsorption of sphingosine-1-phosphate.			Pubmed	0.000145	1	0.00583	0.0637	2	4	APOM,LRP2
Pubmed	23826131	Genetic variants in vitamin d pathway genes and risk of pancreas cancer; results from a population-based case-control study in ontario, Canada.			Pubmed	0.000145	1	0.00583	0.0637	2	4	CYP24A1,LRP2
Pubmed	29724786	Autism-associated neuroligin-4 mutation selectively impairs glycinergic synaptic transmission in mouse brainstem synapses.			Pubmed	0.000145	1	0.00583	0.0637	2	4	PVALB,NLGN1
Pubmed	26414615	A direct translaminar inhibitory circuit tunes cortical output.			Pubmed	0.000145	1	0.00583	0.0637	2	4	GAD1,PVALB
Pubmed	22854050	Activated HER-receptors in predicting outcome of ER-positive breast cancer patients treated with adjuvant endocrine therapy.			Pubmed	0.000145	1	0.00583	0.0637	2	4	ERBB3,ERBB4
Pubmed	19409979	Differential gene expression in young and senescent endothelial cells under static and laminar shear stress conditions.			Pubmed	0.000145	1	0.00583	0.0637	2	4	NOX4,ASS1
Pubmed	9771475	The erbB/HER type 1 tyrosine kinase receptor family.			Pubmed	0.000145	1	0.00583	0.0637	2	4	ERBB3,ERBB4
Pubmed	10662590	PAP I interacts with itself, PAP II, PAP III, and lithostathine/regIalpha.			Pubmed	0.000145	1	0.00583	0.0637	2	4	TRHDE,ANXA3
Pubmed	15733067	Laminin-1 and epidermal growth factor family members co-stimulate fetal pancreas cell proliferation and colony formation.			Pubmed	0.000145	1	0.00583	0.0637	2	4	ERBB3,ERBB4
Pubmed	15086023	Anatomical studies of the mouse genital tubercle.			Pubmed	0.000145	1	0.00583	0.0637	2	4	KRT7,CDH1
Pubmed	20714325	EGF signaling activates proliferation and blocks apoptosis of mouse and human intestinal stem/progenitor cells in long-term monolayer cell culture.			Pubmed	0.000145	1	0.00583	0.0637	2	4	EGF,CDH1
Pubmed	22272358	Distribution of GABAergic interneurons and dopaminergic cells in the functional territories of the human striatum.			Pubmed	0.000145	1	0.00583	0.0637	2	4	PVALB,CALB1
Pubmed	8816440	A hierarchical network of interreceptor interactions determines signal transduction by Neu differentiation factor/neuregulin and epidermal growth factor.			Pubmed	0.000145	1	0.00583	0.0637	2	4	ERBB3,ERBB4
Pubmed	10322631	Metanephric rat-mouse chimeras to study cell lineage of the nephron.			Pubmed	0.000145	1	0.00583	0.0637	2	4	UMOD,REN
Pubmed	23922229	Nav1.1 haploinsufficiency in excitatory neurons ameliorates seizure-associated sudden death in a mouse model of Dravet syndrome.			Pubmed	0.000145	1	0.00583	0.0637	2	4	GAD1,PVALB
Pubmed	16183778	Quantitative analysis of FMO gene mRNA levels in human tissues.			Pubmed	0.000145	1	0.00583	0.0637	2	4	FMO1,FMO5
Pubmed	23660954	AP-2? suppresses invasion in BeWo cells by repression of matrix metalloproteinase-2 and -9 and up-regulation of E-cadherin.			Pubmed	0.000145	1	0.00583	0.0637	2	4	TFAP2A,CDH1
Pubmed	7720101	The molecular biology of the flavin-containing monooxygenases of man.			Pubmed	0.000145	1	0.00583	0.0637	2	4	FMO1,FMO5
Pubmed	9168114	Ligands for ErbB-family receptors encoded by a neuregulin-like gene.			Pubmed	0.000145	1	0.00583	0.0637	2	4	ERBB3,ERBB4
Pubmed	9168115	Neuregulin-2, a new ligand of ErbB3/ErbB4-receptor tyrosine kinases.			Pubmed	0.000145	1	0.00583	0.0637	2	4	ERBB3,ERBB4
Pubmed	12711551	Expression of Tfap2d, the gene encoding the transcription factor Ap-2 delta, during mouse embryogenesis.			Pubmed	0.000145	1	0.00583	0.0637	2	4	TFAP2A,TFAP2B
Pubmed	15371303	Temporal requirement for hedgehog signaling in ventral telencephalic patterning.			Pubmed	0.000148	1	0.0059	0.0646	3	21	GAD1,CALB1,EMX2
Pubmed	10579907	Phospholipase C-gamma as a signal-transducing element.			Pubmed	0.000148	1	0.0059	0.0646	3	21	KL,FGF9,FGFR3
Pubmed	20833365	FGF9 suppresses meiosis and promotes male germ cell fate in mice.			Pubmed	0.000148	1	0.0059	0.0646	3	21	FGF9,FGFR3,CDH1
Pubmed	32464196	Mdm4 controls ureteric bud branching via regulation of p53 activity.			Pubmed	0.000148	1	0.0059	0.0646	3	21	CALB1,EMX2,CDH1
Pubmed	24603431	Mitogen-activated protein kinase (MAPK) pathway regulates branching by remodeling epithelial cell adhesion.			Pubmed	0.000148	1	0.0059	0.0646	3	21	UMOD,CALB1,CDH1
Pubmed	23747249	Diet1 functions in the FGF15/19 enterohepatic signaling axis to modulate bile acid and lipid levels.			Pubmed	0.000148	1	0.0059	0.0646	3	21	NR1H4,NEBL,SLC10A2
Pubmed	25995483	Prdm13 regulates subtype specification of retinal amacrine interneurons and modulates visual sensitivity.			Pubmed	0.000148	1	0.0059	0.0646	3	21	GAD1,CALB1,TFAP2A
Pubmed	29184203	Arid1b haploinsufficiency disrupts cortical interneuron development and mouse behavior.			Pubmed	0.000151	1	0.00601	0.0657	4	54	GAD1,PPARGC1A,PVALB,CALB1
Pubmed	22581228	A genome-wide approach accounting for body mass index identifies genetic variants influencing fasting glycemic traits and insulin resistance.			Pubmed	0.000162	1	0.00645	0.0705	4	55	CHL1,COBLL1,GRB14,SLC2A2
Pubmed	19906978	Brn3a and Nurr1 mediate a gene regulatory pathway for habenula development.			Pubmed	0.000169	1	0.0067	0.0732	6	163	TSPAN12,MAOA,ADGRG1,KL,SOSTDC1,CUBN
Pubmed	27469598	Olig2 regulates Purkinje cell generation in the early developing mouse cerebellum.			Pubmed	0.000171	1	0.00673	0.0736	3	22	PVALB,CALB1,LHX1
Pubmed	31740596	Galnt11 regulates kidney function by glycosylating the endocytosis receptor megalin to modulate ligand binding.			Pubmed	0.000171	1	0.00673	0.0736	3	22	GALNT14,CUBN,LRP2
Pubmed	18094249	Lim1 is essential for the correct laminar positioning of retinal horizontal cells.			Pubmed	0.000171	1	0.00673	0.0736	3	22	PCP4,CALB1,LHX1
Pubmed	23595884	Glucocorticoid receptor is required for foetal heart maturation.			Pubmed	0.000171	1	0.00673	0.0736	3	22	PPARGC1A,NR3C2,HSD11B2
Pubmed	18250098	Activation of beta-catenin signaling by Rspo1 controls differentiation of the mammalian ovary.			Pubmed	0.000171	1	0.00673	0.0736	3	22	FGF9,EMX2,CDH1
Pubmed	29229773	AP-2? and AP-2? cooperatively orchestrate homeobox gene expression during branchial arch patterning.			Pubmed	0.000171	1	0.00673	0.0736	3	22	TFAP2A,TFAP2B,EMX2
Pubmed	18391953	Rare independent mutations in renal salt handling genes contribute to blood pressure variation.			Pubmed	0.000171	1	0.00673	0.0736	3	22	KCNJ1,KCNJ16,SLC12A1
Pubmed	14718574	The human plasma proteome: a nonredundant list developed by combination of four separate sources.			Pubmed	0.00018	1	0.00709	0.0775	6	165	AZGP1,CLU,FGB,KNG1,RBP4,SERPINA5
Pubmed	8827514	Genetic regulation of cholesterol homeostasis: chromosomal organization of candidate genes.			Pubmed	0.000182	1	0.00713	0.0779	5	105	HMGCS2,CLU,BHMT2,CRYAB,LRP2
Pubmed	27974211	Dual Shp2 and Pten Deficiencies Promote Non-alcoholic Steatohepatitis and Genesis of Liver Tumor-Initiating Cells.			Pubmed	0.000196	1	0.00764	0.0835	3	23	ACADL,FABP1,PCK1
Pubmed	29684311	TFAM is required for maturation of the fetal and adult intestinal epithelium.			Pubmed	0.000196	1	0.00764	0.0835	3	23	CUBN,MTTP,CDH1
Pubmed	16818446	FGF signalling generates ventral telencephalic cells independently of SHH.			Pubmed	0.000196	1	0.00764	0.0835	3	23	GAD1,FGFR3,EMX2
Pubmed	20934536	Fgf9 signalling stimulates Spred and Sprouty expression in embryonic mouse pancreas mesenchyme.			Pubmed	0.000196	1	0.00764	0.0835	3	23	FGF9,FGFR3,CDH1
Pubmed	29237738	Ascending Vasa Recta Are Angiopoietin/Tie2-Dependent Lymphatic-Like Vessels.			Pubmed	0.000196	1	0.00764	0.0835	3	23	UMOD,SLC14A1,CDH16
Pubmed	20201926	Human variation in alcohol response is influenced by variation in neuronal signaling genes.			Pubmed	0.000219	1	0.00848	0.0927	6	171	HGD,GAD1,COL4A3,REN,NLGN1,EGF
Pubmed	19680556	Genetic variation in healthy oldest-old.			Pubmed	0.000223	1	0.00848	0.0927	3	24	PPARGC1A,KL,CRYAB
Pubmed	24335253	Otx2 cell-autonomously determines dorsal mesencephalon versus cerebellum fate independently of isthmic organizing activity.			Pubmed	0.000223	1	0.00848	0.0927	3	24	PVALB,CALB1,LHX1
Pubmed	31666704	Hierarchical organization of cortical and thalamic connectivity.			Pubmed	0.000223	1	0.00848	0.0927	3	24	ERBB4,PVALB,CALB1
Pubmed	22275141	Dynamic distribution of claudin proteins in pancreatic epithelia undergoing morphogenesis or neoplastic transformation.			Pubmed	0.000223	1	0.00848	0.0927	3	24	CLDN10,CLDN8,CDH1
Pubmed	21655085	FGF signaling regulates the number of posterior taste papillae by controlling progenitor field size.			Pubmed	0.000223	1	0.00848	0.0927	3	24	FGF9,FGFR3,CDH1
Pubmed	11739647	Complexes of tetraspanins with integrins: more than meets the eye.			Pubmed	0.000223	1	0.00848	0.0927	3	24	TSPAN12,TSPAN1,TSPAN8
Pubmed	21982646	A conserved Pbx-Wnt-p63-Irf6 regulatory module controls face morphogenesis by promoting epithelial apoptosis.			Pubmed	0.000223	1	0.00848	0.0927	3	24	FGF9,TFAP2A,CDH1
Pubmed	23251661	Novel genetic loci identified for the pathophysiology of childhood obesity in the Hispanic population.			Pubmed	0.00023	1	0.00848	0.0927	13	815	CHL1,ERBB3,SPINK1,NELL1,HPD,PVALB,GPC5,SH3GL2,TOM1L1,NOX4,SLC4A1,SHANK2,EMX2
Pubmed	19074032	COUP-TFII is preferentially expressed in the caudal ganglionic eminence and is involved in the caudal migratory stream.			Pubmed	0.000241	1	0.00848	0.0927	2	5	PVALB,CALB1
Pubmed	10572067	Dominance of ErbB-1 heterodimers in lung epithelial cells overexpressing ErbB-2. Both ErbB-1 and ErbB-2 contribute significantly to tumorigenicity.			Pubmed	0.000241	1	0.00848	0.0927	2	5	ERBB3,ERBB4
Pubmed	16263760	Endocytosis of megalin by visceral endoderm cells requires the Dab2 adaptor protein.			Pubmed	0.000241	1	0.00848	0.0927	2	5	CUBN,LRP2
Pubmed	22028439	CDH16/Ksp-cadherin is expressed in the developing thyroid gland and is strongly down-regulated in thyroid carcinomas.			Pubmed	0.000241	1	0.00848	0.0927	2	5	CDH1,CDH16
Pubmed	15924139	TRPC6 is a glomerular slit diaphragm-associated channel required for normal renal function.			Pubmed	0.000241	1	0.00848	0.0927	2	5	NPHS2,NPHS1
Pubmed	11498539	a4, a unique kidney-specific isoform of mouse vacuolar H+-ATPase subunit a.			Pubmed	0.000241	1	0.00848	0.0927	2	5	SLC4A1,ATP6V0A4
Pubmed	14675051	Comparative ontogeny, processing, and segmental distribution of the renal chloride channel, ClC-5.			Pubmed	0.000241	1	0.00848	0.0927	2	5	UMOD,ATP6V0A4
Pubmed	20227043	An activated ErbB3/NRG1 autocrine loop supports in vivo proliferation in ovarian cancer cells.			Pubmed	0.000241	1	0.00848	0.0927	2	5	ERBB3,ERBB4
Pubmed	10978518	Characterization of the mouse gene, human promoter and human cDNA of TSCOT reveals strong interspecies homology.			Pubmed	0.000241	1	0.00848	0.0927	2	5	TYRP1,SH3GL2
Pubmed	16672719	Analysis of transcription factor AP-2 expression and function during mouse preimplantation development.			Pubmed	0.000241	1	0.00848	0.0927	2	5	TFAP2A,TFAP2B
Pubmed	15682394	The vertebrate ortholog of Aristaless is regulated by Dlx genes in the developing forebrain.			Pubmed	0.000241	1	0.00848	0.0927	2	5	GAD1,CALB1
Pubmed	20457601	CIN85/RukL is a novel binding partner of nephrin and podocin and mediates slit diaphragm turnover in podocytes.			Pubmed	0.000241	1	0.00848	0.0927	2	5	NPHS2,NPHS1
Pubmed	19275937	Developmental distribution of collagen IV isoforms and relevance to ocular diseases.			Pubmed	0.000241	1	0.00848	0.0927	2	5	COL4A3,COL4A4
Pubmed	26930157	Shh/Ptch and EGF/ErbB cooperatively regulate branching morphogenesis of fetal mouse submandibular glands.			Pubmed	0.000241	1	0.00848	0.0927	2	5	ERBB3,EGF
Pubmed	9409248	In vitro interactions of oxidatively modified LDL with type I, II, III, IV, and V collagen, laminin, fibronectin, and poly-D-lysine.			Pubmed	0.000241	1	0.00848	0.0927	2	5	COL4A3,COL4A4
Pubmed	11562346	Bidirectional action of the Igf2r imprint control element on upstream and downstream imprinted genes.			Pubmed	0.000241	1	0.00848	0.0927	2	5	PLG,SLC22A2
Pubmed	19142224	An essential role of the universal polarity protein, aPKClambda, on the maintenance of podocyte slit diaphragms.			Pubmed	0.000241	1	0.00848	0.0927	2	5	NPHS2,NPHS1
Pubmed	19891555	Genetic variation in CYP27B1 is associated with congestive heart failure in patients with hypertension.			Pubmed	0.000241	1	0.00848	0.0927	2	5	CYP24A1,REN
Pubmed	23817549	Inhibition of inhibition in visual cortex: the logic of connections between molecularly distinct interneurons.			Pubmed	0.000241	1	0.00848	0.0927	2	5	GAD1,PVALB
Pubmed	24853942	The lipid kinase PIP5K1C regulates pain signaling and sensitization.			Pubmed	0.000241	1	0.00848	0.0927	2	5	ACP3,PIP5K1B
Pubmed	12225806	Collagen IV in the developing lens capsule.			Pubmed	0.000241	1	0.00848	0.0927	2	5	COL4A3,COL4A4
Pubmed	25416285	Localization of phosphorylated ErbB1-4 and heregulin in colorectal cancer.			Pubmed	0.000241	1	0.00848	0.0927	2	5	ERBB3,ERBB4
Pubmed	20394945	Infantile hypercalcemia and hypercalciuria: new insights into a vitamin D-dependent mechanism and response to ketoconazole treatment.			Pubmed	0.000241	1	0.00848	0.0927	2	5	CYP24A1,KL
Pubmed	16204191	Long-range DNase I hypersensitivity mapping reveals the imprinted Igf2r and Air promoters share cis-regulatory elements.			Pubmed	0.000241	1	0.00848	0.0927	2	5	PLG,SLC22A2
Pubmed	19690166	Transcriptional corepressor SMILE recruits SIRT1 to inhibit nuclear receptor estrogen receptor-related receptor gamma transactivation.			Pubmed	0.000241	1	0.00848	0.0927	2	5	ESRRG,PPARGC1A
Pubmed	28817803	Developmental Dysfunction of VIP Interneurons Impairs Cortical Circuits.			Pubmed	0.000241	1	0.00848	0.0927	2	5	ERBB4,PVALB
Pubmed	32699410	Two dynamically distinct circuits drive inhibition in the sensory thalamus.			Pubmed	0.000241	1	0.00848	0.0927	2	5	PVALB,CALB1
Pubmed	8311461	A nomenclature for the mammalian flavin-containing monooxygenase gene family based on amino acid sequence identities.			Pubmed	0.000241	1	0.00848	0.0927	2	5	FMO1,FMO5
Pubmed	9973259	Effects of mineralocorticoid receptor gene disruption on the components of the renin-angiotensin system in 8-day-old mice.			Pubmed	0.000241	1	0.00848	0.0927	2	5	NR3C2,REN
Pubmed	12939402	Heregulin targets gamma-catenin to the nucleolus by a mechanism dependent on the DF3/MUC1 oncoprotein.			Pubmed	0.000241	1	0.00848	0.0927	2	5	ERBB3,ERBB4
Pubmed	16928804	Expression of the ammonia transporter, rh C glycoprotein, in normal and neoplastic human kidney.			Pubmed	0.000241	1	0.00848	0.0927	2	5	SLC26A4,CALB1
Pubmed	20160196	Confirmation that the renin gene distal enhancer polymorphism REN-5312C/T is associated with increased blood pressure.			Pubmed	0.000241	1	0.00848	0.0927	2	5	REN,ACE2
Pubmed	33436498	Cytoplasmic short linear motifs in ACE2 and integrin ?			Pubmed	0.000241	1	0.00848	0.0927	2	5	PDZK1,ACE2
Pubmed	15254894	Tissue interaction mediated by neuregulin-1 and ErbB receptors regulates epithelial morphogenesis of mouse embryonic submandibular gland.			Pubmed	0.000241	1	0.00848	0.0927	2	5	ERBB3,ERBB4
Pubmed	8128486	The mammalian flavin-containing monooxygenases: molecular characterization and regulation of expression.			Pubmed	0.000241	1	0.00848	0.0927	2	5	FMO1,FMO5
Pubmed	23723069	Leucine-rich repeat and immunoglobulin domain-containing protein-1 (Lrig1) negative regulatory action toward ErbB receptor tyrosine kinases is opposed by leucine-rich repeat and immunoglobulin domain-containing protein 3 (Lrig3).			Pubmed	0.000241	1	0.00848	0.0927	2	5	ERBB3,ERBB4
Pubmed	12150774	Effect of Brn-3a deficiency on parvalbumin-, calbindin D-28k-, calretinin- and calcitonin gene-related peptide-immunoreactive primary sensory neurons in the trigeminal ganglion.			Pubmed	0.000241	1	0.00848	0.0927	2	5	PVALB,CALB1
Pubmed	14612590	Mapping blood pressure loci in (A/J x B6)F2 mice.			Pubmed	0.000241	1	0.00848	0.0927	2	5	CA10,SLC4A1
Pubmed	27078042	The expression profiles of fibroblast growth factor 9 and its receptors in developing mice testes.			Pubmed	0.000241	1	0.00848	0.0927	2	5	FGF9,FGFR3
Pubmed	23137868	Expression of epidermal growth factors and a tight junction protein in the nasal mucosa of patients with chronic hypertrophic rhinitis.			Pubmed	0.000241	1	0.00848	0.0927	2	5	ERBB3,ERBB4
Pubmed	17960397	Association of familial colorectal cancer with variants in the E-cadherin (CDH1) and cyclin D1 (CCND1) genes.			Pubmed	0.000241	1	0.00848	0.0927	2	5	SLC10A2,CDH1
Pubmed	9342050	Isoform-specific expression and function of neuregulin.			Pubmed	0.000241	1	0.00848	0.0927	2	5	ERBB3,ERBB4
Pubmed	10534397	Insertional mutation of the collagen genes Col4a3 and Col4a4 in a mouse model of Alport syndrome.			Pubmed	0.000241	1	0.00848	0.0927	2	5	COL4A3,COL4A4
Pubmed	27581450	Neuroligins Are Selectively Essential for NMDAR Signaling in Cerebellar Stellate Interneurons.			Pubmed	0.000241	1	0.00848	0.0927	2	5	PVALB,NLGN1
Pubmed	26245758	Deletion of angiotensin-converting enzyme 2 exacerbates renal inflammation and injury in apolipoprotein E-deficient mice through modulation of the nephrin and TNF-alpha-TNFRSF1A signaling.			Pubmed	0.000241	1	0.00848	0.0927	2	5	NPHS1,ACE2
Pubmed	22554477	Gene expression pattern of the epidermal growth factor receptor family and LRIG1 in renal cell carcinoma.			Pubmed	0.000241	1	0.00848	0.0927	2	5	ERBB3,ERBB4
Pubmed	15524405	Neuregulin-1 induces branching morphogenesis in the developing lung through a P13K signal pathway.			Pubmed	0.000241	1	0.00848	0.0927	2	5	ERBB3,ERBB4
Pubmed	17467685	Cellular mechanisms of Mllerian duct formation in the mouse.			Pubmed	0.000241	1	0.00848	0.0927	2	5	LHX1,CDH1
Pubmed	12646923	Segregation of receptor and ligand regulates activation of epithelial growth factor receptor.			Pubmed	0.000241	1	0.00848	0.0927	2	5	ERBB3,ERBB4
Pubmed	16610949	Polymorphisms in genes regulating the HPA axis associated with empirically delineated classes of unexplained chronic fatigue.			Pubmed	0.000241	1	0.00848	0.0927	2	5	MAOA,MAOB
Pubmed	21407808	Alternative HER/PTEN/Akt pathway activation in HPV positive and negative penile carcinomas.			Pubmed	0.000241	1	0.00848	0.0927	2	5	ERBB3,ERBB4
Pubmed	8643489	Neuregulins with an Ig-like domain are essential for mouse myocardial and neuronal development.			Pubmed	0.000241	1	0.00848	0.0927	2	5	ERBB3,ERBB4
Pubmed	12754525	Insulin-regulated hepatic gluconeogenesis through FOXO1-PGC-1alpha interaction.			Pubmed	0.000241	1	0.00848	0.0927	2	5	PPARGC1A,G6PC1
Pubmed	21040847	Monosynaptic rabies virus reveals premotor network organization and synaptic specificity of cholinergic partition cells.			Pubmed	0.000241	1	0.00848	0.0927	2	5	GAD1,PVALB
Pubmed	18443236	Common variants in genes underlying monogenic hypertension and hypotension and blood pressure in the general population.			Pubmed	0.000241	1	0.00848	0.0927	2	5	KCNJ1,NR3C2
Pubmed	16211368	Molecular properties of the SLC13 family of dicarboxylate and sulfate transporters.			Pubmed	0.000241	1	0.00848	0.0927	2	5	SLC13A3,SLC13A1
Pubmed	9449663	Differential expression and function of cadherin-6 during renal epithelium development.			Pubmed	0.000241	1	0.00848	0.0927	2	5	CDH1,CDH6
Pubmed	9019162	Heregulin (HRG)-induced mitogenic signaling and cytotoxic activity of a HRG/PE40 ligand toxin in human breast cancer cells.			Pubmed	0.000241	1	0.00848	0.0927	2	5	ERBB3,ERBB4
Pubmed	15558732	Embryonic and postnatal development of GABA, calbindin, calretinin, and parvalbumin in the mouse claustral complex.			Pubmed	0.000241	1	0.00848	0.0927	2	5	PVALB,CALB1
Pubmed	18063693	Phosphorylation-dependent sumoylation regulates estrogen-related receptor-alpha and -gamma transcriptional activity through a synergy control motif.			Pubmed	0.000241	1	0.00848	0.0927	2	5	ESRRG,PPARGC1A
Pubmed	9152004	The molecular basis of embryonic kidney development.			Pubmed	0.000241	1	0.00848	0.0927	2	5	CDH1,CDH6
Pubmed	12900932	Developmental expression pattern of monoamine oxidases in sensory organs and neural crest derivatives.			Pubmed	0.000241	1	0.00848	0.0927	2	5	MAOA,MAOB
Pubmed	11689706	The mouse snail gene encodes a key regulator of the epithelial-mesenchymal transition.			Pubmed	0.000241	1	0.00848	0.0927	2	5	LHX1,CDH1
Pubmed	26886748	Hepatitis C Virus Activates a Neuregulin-Driven Circuit to Modify Surface Expression of Growth Factor Receptors of the ErbB Family.			Pubmed	0.000241	1	0.00848	0.0927	2	5	ERBB3,ERBB4
Pubmed	12067061	Organization and formation of the tight junction system in human epidermis and cultured keratinocytes.			Pubmed	0.000241	1	0.00848	0.0927	2	5	CLDN10,CLDN8
Pubmed	23912123	DBZ (DISC1-binding zinc finger protein)-deficient mice display abnormalities in basket cells in the somatosensory cortices.			Pubmed	0.000241	1	0.00848	0.0927	2	5	GAD1,PVALB
Pubmed	17409310	Distal renal tubular acidosis in mice lacking the AE1 (band3) Cl-/HCO3- exchanger (slc4a1).			Pubmed	0.000241	1	0.00848	0.0927	2	5	SLC26A4,SLC4A1
Pubmed	21184805	Impaired neonatal survival of pro-opiomelanocortin null mutants.			Pubmed	0.000241	1	0.00848	0.0927	2	5	G6PC1,PCK1
Pubmed	27582101	A fate-mapping approach reveals the composite origin of the connecting tubule and alerts on "single-cell"-specific KO model of the distal nephron.			Pubmed	0.000241	1	0.00848	0.0927	2	5	SLC26A4,SLC4A1
Pubmed	7589796	Synapse-associated expression of an acetylcholine receptor-inducing protein, ARIA/heregulin, and its putative receptors, ErbB2 and ErbB3, in developing mammalian muscle.			Pubmed	0.000241	1	0.00848	0.0927	2	5	ERBB3,ERBB4
Pubmed	29720668	Central role of the proximal tubular ?Klotho/FGF receptor complex in FGF23-regulated phosphate and vitamin D metabolism.			Pubmed	0.000241	1	0.00848	0.0927	2	5	KL,FGFR3
Pubmed	28094278	Persistent fibroblast growth factor 23 signalling in the parathyroid glands for secondary hyperparathyroidism in mice with chronic kidney disease.			Pubmed	0.000241	1	0.00848	0.0927	2	5	KL,FGFR3
Pubmed	12228234	The human reduced folate carrier gene is regulated by the AP2 and sp1 transcription factor families and a functional 61-base pair polymorphism.			Pubmed	0.000241	1	0.00848	0.0927	2	5	TFAP2A,TFAP2B
Pubmed	8576175	Expression and biological activity of mouse fibroblast growth factor-9.			Pubmed	0.000241	1	0.00848	0.0927	2	5	FGF9,FGFR3
Pubmed	31600044	Hereditary Distal Renal Tubular Acidosis			Pubmed	0.000241	1	0.00848	0.0927	2	5	SLC4A1,ATP6V0A4
Pubmed	11732842	Localization of type IV collagen a 1 to a 6 chains in basement membrane during mouse molar germ development.			Pubmed	0.000241	1	0.00848	0.0927	2	5	COL4A3,COL4A4
Pubmed	12072434	Transcription factor AP-2 interacts with the SUMO-conjugating enzyme UBC9 and is sumolated in vivo.			Pubmed	0.000241	1	0.00848	0.0927	2	5	TFAP2A,TFAP2B
Pubmed	30923332	Development of the urogenital system is regulated via the 3'UTR of GDNF.			Pubmed	0.000241	1	0.00848	0.0927	2	5	CALB1,CDH1
Pubmed	22411557	Overlapping expression patterns and redundant roles for AP-2 transcription factors in the developing mammalian retina.			Pubmed	0.000253	1	0.00883	0.0966	3	25	TFAP2A,TFAP2B,LHX1
Pubmed	18625063	FGF15 promotes neurogenesis and opposes FGF8 function during neocortical development.			Pubmed	0.000253	1	0.00883	0.0966	3	25	GAD1,FGFR3,EMX2
Pubmed	24983448	FGF/FGFR2 signaling regulates the generation and correct positioning of Bergmann glia cells in the developing mouse cerebellum.			Pubmed	0.000253	1	0.00883	0.0966	3	25	FGF9,FGFR3,CALB1
Pubmed	29158444	HNF1B controls epithelial organization and cell polarity during ureteric bud branching and collecting duct morphogenesis.			Pubmed	0.000253	1	0.00883	0.0966	3	25	SLC26A4,SLC12A1,CDH1
Pubmed	23554936	Visceral endoderm expression of Yin-Yang1 (YY1) is required for VEGFA maintenance and yolk sac development.			Pubmed	0.000253	1	0.00883	0.0966	3	25	PPARGC1A,LRP2,CDH1
Pubmed	31665922	Developmental abnormalities in cortical GABAergic system in mice lacking mGlu3 metabotropic glutamate receptors.			Pubmed	0.000253	1	0.00883	0.0966	3	25	GAD1,PVALB,GABRA2
Pubmed	21044950	Genome-wide YFP fluorescence complementation screen identifies new regulators for telomere signaling in human cells.			Pubmed	0.000256	1	0.00894	0.0978	8	330	PCP4,EPHX2,HGD,PIPOX,SULT1C2,SH3GL2,MAP7,ASS1
Pubmed	19060336	A Wnt7b-dependent pathway regulates the orientation of epithelial cell division and establishes the cortico-medullary axis of the mammalian kidney.			Pubmed	0.000285	1	0.00992	0.108	3	26	UMOD,CDH1,CDH6
Pubmed	24507192	Olig1 function is required to repress dlx1/2 and interneuron production in Mammalian brain.			Pubmed	0.000285	1	0.00992	0.108	3	26	GAD1,PVALB,TFAP2B
Pubmed	27740873	Retinol Dehydrogenase-10 Regulates Pancreas Organogenesis and Endocrine Cell Differentiation via Paracrine Retinoic Acid Signaling.			Pubmed	0.000319	1	0.0111	0.121	3	27	RBP4,SLC2A2,CDH1
Pubmed	30063881	Canonical Wnt signaling regulates patterning, differentiation and nucleogenesis in mouse hypothalamus and prethalamus.			Pubmed	0.000319	1	0.0111	0.121	3	27	SIM1,LHX1,EMX2
Pubmed	20173083	Genetic variation in metabolizing enzyme and transporter genes: comprehensive assessment in 3 major East Asian subpopulations with comparison to Caucasians and Africans.			Pubmed	0.000319	1	0.0111	0.121	3	27	CYP3A5,SLC15A2,SLC22A2
Pubmed	19544582	Fibroblast growth factor (FGF) gene expression in the developing cerebellum suggests multiple roles for FGF signaling during cerebellar morphogenesis and development.			Pubmed	0.000319	1	0.0111	0.121	3	27	FGF9,FGFR3,LHX1
Pubmed	20383146	New loci associated with kidney function and chronic kidney disease.			Pubmed	0.000329	1	0.0114	0.125	4	66	UMOD,PIP5K1B,SLC7A9,SLC22A2
Pubmed	28705898	Cellular heterogeneity in the ureteric progenitor niche and distinct profiles of branching morphogenesis in organ development.			Pubmed	0.000338	1	0.0115	0.126	5	120	CALB1,CXCL14,LHX1,SLCO4C1,ATP6V0A4
Pubmed	23263486	Genome-wide association analyses identify 18 new loci associated with serum urate concentrations.			Pubmed	0.000348	1	0.0115	0.126	4	67	SLC17A3,PDZK1,FRK,SLC17A1
Pubmed	21658586	Lhx6 and Lhx8 coordinately induce neuronal expression of Shh that controls the generation of interneuron progenitors.			Pubmed	0.000356	1	0.0115	0.126	3	28	GAD1,PVALB,CALB1
Pubmed	27069866	Insulin-like peptide 5 is a microbially regulated peptide that promotes hepatic glucose production.			Pubmed	0.00036	1	0.0115	0.126	2	6	G6PC1,PCK1
Pubmed	12388412	Localization of the ammonium transporter proteins RhBG and RhCG in mouse kidney.			Pubmed	0.00036	1	0.0115	0.126	2	6	SLC26A4,SLC4A1
Pubmed	2426947	Extracellular matrix of the human optic nerve head.			Pubmed	0.00036	1	0.0115	0.126	2	6	COL4A3,COL4A4
Pubmed	16540514	FGF9 promotes survival of germ cells in the fetal testis.			Pubmed	0.00036	1	0.0115	0.126	2	6	FGF9,CDH1
Pubmed	15358134	Neuroglycan C, a novel member of the neuregulin family.			Pubmed	0.00036	1	0.0115	0.126	2	6	ERBB3,ERBB4
Pubmed	23836911	Peroxisome proliferator-activated receptor ? coactivator 1 (PGC-1)- and estrogen-related receptor (ERR)-induced regulator in muscle 1 (Perm1) is a tissue-specific regulator of oxidative capacity in skeletal muscle cells.			Pubmed	0.00036	1	0.0115	0.126	2	6	ESRRG,PPARGC1A
Pubmed	10574949	Mapping ligand binding domains in chimeric fibroblast growth factor receptor molecules. Multiple regions determine ligand binding specificity.			Pubmed	0.00036	1	0.0115	0.126	2	6	FGF9,FGFR3
Pubmed	18753255	FGFR3 and FGFR4 do not mediate renal effects of FGF23.			Pubmed	0.00036	1	0.0115	0.126	2	6	KL,FGFR3
Pubmed	10716744	Hypoplastic basement membrane of the lens anlage in the inheritable lens aplastic mouse (lap mouse).			Pubmed	0.00036	1	0.0115	0.126	2	6	COL4A3,COL4A4
Pubmed	19177150	The novel lipid raft adaptor p18 controls endosome dynamics by anchoring the MEK-ERK pathway to late endosomes.			Pubmed	0.00036	1	0.0115	0.126	2	6	CUBN,LRP2
Pubmed	16275913	WNK3 kinase is a positive regulator of NKCC2 and NCC, renal cation-Cl- cotransporters required for normal blood pressure homeostasis.			Pubmed	0.00036	1	0.0115	0.126	2	6	SLC12A1,CDH1
Pubmed	18405071	Alcohol dependence and polymorphisms of serotonin-related genes: association studies.			Pubmed	0.00036	1	0.0115	0.126	2	6	MAOA,MAOB
Pubmed	15523054	PDZK1 directly regulates the function of organic cation/carnitine transporter OCTN2.			Pubmed	0.00036	1	0.0115	0.126	2	6	PDZK1,SLC22A5
Pubmed	14966198	Immunohistochemical characterization of the orphan nuclear receptor ROR alpha in the mouse nervous system.			Pubmed	0.00036	1	0.0115	0.126	2	6	PVALB,CALB1
Pubmed	17192470	FGFR3 is a negative regulator of the expansion of pancreatic epithelial cells.			Pubmed	0.00036	1	0.0115	0.126	2	6	FGF9,FGFR3
Pubmed	12586840	Physical and functional interactions among AP-2 transcription factors, p300/CREB-binding protein, and CITED2.			Pubmed	0.00036	1	0.0115	0.126	2	6	TFAP2A,TFAP2B
Pubmed	9918694	AP-2alpha transcription factor is required for early morphogenesis of the lens vesicle.			Pubmed	0.00036	1	0.0115	0.126	2	6	TFAP2A,TFAP2B
Pubmed	26919869	Rhythmic expression of miR-27b-3p targets the clock gene Bmal1 at the posttranscriptional level in the mouse liver.			Pubmed	0.00036	1	0.0115	0.126	2	6	G6PC1,PCK1
Pubmed	26822476	Common arterial trunk and ventricular non-compaction in Lrp2 knockout mice indicate a crucial role of LRP2 in cardiac development.			Pubmed	0.00036	1	0.0115	0.126	2	6	TFAP2A,LRP2
Pubmed	24026051	Evidence that the novel receptor FGFRL1 signals indirectly via FGFR1.			Pubmed	0.00036	1	0.0115	0.126	2	6	FGFR3,CALB1
Pubmed	31509576	Loss of prostatic acid phosphatase and ?-synuclein cause motor circuit degeneration without altering cerebellar patterning.			Pubmed	0.00036	1	0.0115	0.126	2	6	ACP3,CALB1
Pubmed	19288186	Brn-3a deficiency transiently increases expression of calbindin D-28 k and calretinin in the trigeminal ganglion during embryonic development.			Pubmed	0.00036	1	0.0115	0.126	2	6	PVALB,CALB1
Pubmed	7495302	HIV-1 gp160 protein-macrophage interactions modulate mesangial cell proliferation and matrix synthesis.			Pubmed	0.00036	1	0.0115	0.126	2	6	COL4A3,COL4A4
Pubmed	29446202	Conditional deletion of Cadherin 13 perturbs Golgi cells and disrupts social and cognitive behaviors.			Pubmed	0.00036	1	0.0115	0.126	2	6	GAD1,CALB1
Pubmed	20845430	Loss of Lhx1 activity impacts on the localization of primordial germ cells in the mouse.			Pubmed	0.00036	1	0.0115	0.126	2	6	LHX1,CDH1
Pubmed	23551189	Angiogenesis and collagen type IV expression in different endothelial cell culture systems.			Pubmed	0.00036	1	0.0115	0.126	2	6	COL4A3,COL4A4
Pubmed	18760695	Neuregulin-1/ErbB signaling serves distinct functions in myelination of the peripheral and central nervous system.			Pubmed	0.00036	1	0.0115	0.126	2	6	ERBB3,ERBB4
Pubmed	26246508	Vascular versus tubular renin: role in kidney development.			Pubmed	0.00036	1	0.0115	0.126	2	6	CALB1,REN
Pubmed	29798891	Lrfn2-Mutant Mice Display Suppressed Synaptic Plasticity and Inhibitory Synapse Development and Abnormal Social Communication and Startle Response.			Pubmed	0.00036	1	0.0115	0.126	2	6	GAD1,SLC2A2
Pubmed	8809809	Most classes of dorsal root ganglion neurons are severely depleted but not absent in mice lacking neurotrophin-3.			Pubmed	0.00036	1	0.0115	0.126	2	6	PVALB,CALB1
Pubmed	22493501	Stretch-induced fetal type II cell differentiation is mediated via ErbB1-ErbB4 interactions.			Pubmed	0.00036	1	0.0115	0.126	2	6	ERBB3,ERBB4
Pubmed	16436388	Regulation of fibroblast growth factor-23 signaling by klotho.			Pubmed	0.00036	1	0.0115	0.126	2	6	KL,FGFR3
Pubmed	15376319	Mouse orthologue of ARX, a gene mutated in several X-linked forms of mental retardation and epilepsy, is a marker of adult neural stem cells and forebrain GABAergic neurons.			Pubmed	0.00036	1	0.0115	0.126	2	6	GAD1,EMX2
Pubmed	19232523	Neuron-derived FGF9 is essential for scaffold formation of Bergmann radial fibers and migration of granule neurons in the cerebellum.			Pubmed	0.00036	1	0.0115	0.126	2	6	FGF9,FGFR3
Pubmed	19966287	Isolated C-terminal tail of FGF23 alleviates hypophosphatemia by inhibiting FGF23-FGFR-Klotho complex formation.			Pubmed	0.00036	1	0.0115	0.126	2	6	KL,FGFR3
Pubmed	19366869	The role of Robo3 in the development of cortical interneurons.			Pubmed	0.00036	1	0.0115	0.126	2	6	GAD1,CALB1
Pubmed	10719184	Sequence and expression of seven new tetraspans.			Pubmed	0.00036	1	0.0115	0.126	2	6	TSPAN12,TSPAN1
Pubmed	10022198	Special relationship of gamma-aminobutyric acid to the ventromedial nucleus of the hypothalamus during embryonic development.			Pubmed	0.00036	1	0.0115	0.126	2	6	GAD1,GABRA2
Pubmed	23091025	Cxcr4 regulation of interneuron migration is disrupted in 22q11.2 deletion syndrome.			Pubmed	0.00036	1	0.0115	0.126	2	6	PVALB,CALB1
Pubmed	21572414	A genome-wide association study of metabolic traits in human urine.			Pubmed	0.00036	1	0.0115	0.126	2	6	HPD,SLC7A9
Pubmed	15569994	Expression of matrix metalloproteinase (MMP)-2 and MMP-9 in breast cancer with a special reference to activator protein-2, HER2, and prognosis.			Pubmed	0.00036	1	0.0115	0.126	2	6	TFAP2A,TFAP2B
Pubmed	15496447	Modulation of Erbb2 signaling during development: a threshold level of Erbb2 signaling is required for development.			Pubmed	0.00036	1	0.0115	0.126	2	6	ERBB3,ERBB4
Pubmed	18231572	Differential expression of receptor tyrosine kinases (RTKs) and IGF-I pathway activation in human uterine leiomyomas.			Pubmed	0.00036	1	0.0115	0.126	2	6	ERBB3,FGFR3
Pubmed	12435636	Nephric lineage specification by Pax2 and Pax8.			Pubmed	0.00036	1	0.0115	0.126	2	6	LHX1,CDH1
Pubmed	28912162	Regional Cellular Environment Shapes Phenotypic Variations of Hippocampal and Neocortical Chandelier Cells.			Pubmed	0.00036	1	0.0115	0.126	2	6	PVALB,CDH6
Pubmed	27782124	Wnt and Neuregulin1/ErbB signalling extends 3D culture of hormone responsive mammary organoids.			Pubmed	0.00036	1	0.0115	0.126	2	6	ERBB3,ERBB4
Pubmed	25918552	Tissue-specific regulation of Igf2r/Airn imprinting during gastrulation.			Pubmed	0.00036	1	0.0115	0.126	2	6	PLG,SLC22A2
Pubmed	21167960	Tissue specific characterisation of Lim-kinase 1 expression during mouse embryogenesis.			Pubmed	0.00036	1	0.0115	0.126	2	6	LHX1,CDH1
Pubmed	19477942	Low renal mineralocorticoid receptor expression at birth contributes to partial aldosterone resistance in neonates.			Pubmed	0.00036	1	0.0115	0.126	2	6	NR3C2,HSD11B2
Pubmed	18620078	Immunohistochemical analysis of Disc1 expression in the developing and adult hippocampus.			Pubmed	0.00036	1	0.0115	0.126	2	6	GAD1,CALB1
Pubmed	11331379	Complex trait analysis of the hippocampus: mapping and biometric analysis of two novel gene loci with specific effects on hippocampal structure in mice.			Pubmed	0.00036	1	0.0115	0.126	2	6	FGFR3,GABRA2
Pubmed	18034366	Lack of replication of genetic associations with human longevity.			Pubmed	0.00036	1	0.0115	0.126	2	6	KL,MTTP
Pubmed	28147272	Neuregulin 3 Mediates Cortical Plate Invasion and Laminar Allocation of GABAergic Interneurons.			Pubmed	0.00036	1	0.0115	0.126	2	6	ERBB4,PVALB
Pubmed	10764649	Regulation of area identity in the mammalian neocortex by Emx2 and Pax6.			Pubmed	0.00036	1	0.0115	0.126	2	6	EMX2,CDH6
Pubmed	7521231	Complex patterns of expression suggest extensive roles for the alpha 2 beta 1 integrin in murine development.			Pubmed	0.00036	1	0.0115	0.126	2	6	COL4A3,COL4A4
Pubmed	26076477	Podocyte-Specific Deletion of Murine CXADR Does Not Impair Podocyte Development, Function or Stress Response.			Pubmed	0.00036	1	0.0115	0.126	2	6	NPHS2,NPHS1
Pubmed	17933574	Contrasting features of urea cycle disorders in human patients and knockout mouse models.			Pubmed	0.00036	1	0.0115	0.126	2	6	ARG2,ASS1
Pubmed	22889670	Cerebrospinal fluid biomarkers of neuropathologically diagnosed Parkinson's disease subjects.			Pubmed	0.00036	1	0.0115	0.126	2	6	CLU,FGB
Pubmed	6988303	Distribution of basement membrane proteins in normal and fibrotic human liver: collagen type IV, laminin, and fibronectin.			Pubmed	0.00036	1	0.0115	0.126	2	6	COL4A3,COL4A4
Pubmed	9506531	Stimulation of extracellular matrix components in the normal brain by invading glioma cells.			Pubmed	0.00036	1	0.0115	0.126	2	6	COL4A3,COL4A4
Pubmed	10639489	Nidogen-1. Expression and ultrastructural localization during the onset of mesoderm formation in the early mouse embryo.			Pubmed	0.00036	1	0.0115	0.126	2	6	COL4A3,COL4A4
Pubmed	18156174	Epidermal growth factor stimulates RSK2 activation through activation of the MEK/ERK pathway and src-dependent tyrosine phosphorylation of RSK2 at Tyr-529.			Pubmed	0.00036	1	0.0115	0.126	2	6	FGFR3,EGF
Pubmed	12527699	Identification of novel variants of the flavin-containing monooxygenase gene family in African Americans.			Pubmed	0.00036	1	0.0115	0.126	2	6	FMO1,FMO5
Pubmed	6811420	Monoclonal antibody to human basement membrane collagen type IV.			Pubmed	0.00036	1	0.0115	0.126	2	6	COL4A3,COL4A4
Pubmed	15282549	LRIG1 restricts growth factor signaling by enhancing receptor ubiquitylation and degradation.			Pubmed	0.00036	1	0.0115	0.126	2	6	ERBB3,ERBB4
Pubmed	20702706	Monoamine oxidases regulate telencephalic neural progenitors in late embryonic and early postnatal development.			Pubmed	0.00036	1	0.0115	0.126	2	6	MAOA,MAOB
Pubmed	6389236	Immunolocalization of collagen types, laminin and fibronectin in the normal human pancreas.			Pubmed	0.00036	1	0.0115	0.126	2	6	COL4A3,COL4A4
Pubmed	11278868	Transgenic MUC1 interacts with epidermal growth factor receptor and correlates with mitogen-activated protein kinase activation in the mouse mammary gland.			Pubmed	0.00036	1	0.0115	0.126	2	6	ERBB3,ERBB4
Pubmed	9673377	A tumor derived motility factor that stimulates cell migration on extracellular matrix.			Pubmed	0.00036	1	0.0115	0.126	2	6	COL4A3,COL4A4
Pubmed	22166984	Defining POMC neurons using transgenic reagents: impact of transient Pomc expression in diverse immature neuronal populations.			Pubmed	0.00036	1	0.0115	0.126	2	6	PVALB,CALB1
Pubmed	17519029	Plexin-B1 plays a redundant role during mouse development and in tumour angiogenesis.			Pubmed	0.00036	1	0.0115	0.126	2	6	PVALB,CALB1
Pubmed	21862448	Gene expression analysis of the embryonic subplate.			Pubmed	0.000364	1	0.0115	0.126	6	188	GAD1,FLRT3,MME,NEBL,ANXA3,PPP1R1A
Pubmed	21876757	FGF-2 deficiency does not influence FGF ligand and receptor expression during development of the nigrostriatal system.			Pubmed	0.000396	1	0.0115	0.126	3	29	KL,FGF9,FGFR3
Pubmed	19633665	The genesis of cerebellar interneurons and the prevention of neural DNA damage require XRCC1.			Pubmed	0.000396	1	0.0115	0.126	3	29	GAD1,PVALB,CALB1
Pubmed	16123981	Comprehensive expression atlas of fibroblast growth factors and their receptors generated by a novel robotic in situ hybridization platform.			Pubmed	0.000396	1	0.0115	0.126	3	29	FGF9,FGFR3,TRHDE
Pubmed	24440154	Mdm2 is required for maintenance of the nephrogenic niche.			Pubmed	0.000396	1	0.0115	0.126	3	29	FGF9,LHX1,CDH1
Pubmed	29874580	Roof Plate-Derived Radial Glial-like Cells Support Developmental Growth of Rapidly Adapting Mechanoreceptor Ascending Axons.			Pubmed	0.000396	1	0.0115	0.126	3	29	GAD1,PVALB,LHX1
Pubmed	26620267	Impaired Interneuron Development after Foxg1 Disruption.			Pubmed	0.000396	1	0.0115	0.126	3	29	GAD1,PVALB,CALB1
Pubmed	32123907	Atm deficiency in the DNA polymerase ? null cerebellum results in cerebellar ataxia and Itpr1 reduction associated with alteration of cytosine methylation.			Pubmed	0.000396	1	0.0115	0.126	3	29	GAD1,PVALB,CALB1
Pubmed	12107413	Expressed sequence tag analysis of adult human lens for the NEIBank Project: over 2000 non-redundant transcripts, novel genes and splice variants.			Pubmed	0.000435	1	0.0115	0.126	4	71	LINC00472,TRPM3,HPD,COL4A3
Pubmed	26450968	Suppression of epithelial differentiation by Foxi3 is essential for molar crown patterning.			Pubmed	0.000438	1	0.0115	0.126	3	30	FGF9,SOSTDC1,CDH1
Pubmed	17543594	Novel loci regulating bone anabolic response to loading: expression QTL analysis in C57BL/6JXC3H/HeJ mice cross.			Pubmed	0.000438	1	0.0115	0.126	3	30	HSD11B2,HSD17B2,CDH1
Pubmed	32439762	MLL4 is required after implantation, whereas MLL3 becomes essential during late gestation.			Pubmed	0.000438	1	0.0115	0.126	3	30	CLIC5,LHX1,CDH1
Pubmed	29137925	Polycomb repression complex 2 is required for the maintenance of retinal progenitor cells and balanced retinal differentiation.			Pubmed	0.000438	1	0.0115	0.126	3	30	GAD1,CALB1,TFAP2A
Pubmed	21905163	A high-resolution molecular atlas of the fetal mouse lower urogenital tract.			Pubmed	0.000459	1	0.0115	0.126	4	72	ESRRG,FGF9,KRT7,CDH1
Pubmed	27626380	High-throughput discovery of novel developmental phenotypes.			Pubmed	0.000479	1	0.0115	0.126	19	1624	SLC17A3,PIPOX,LRRC2,FABP1,BHMT,CLU,TOX3,FGF9,BBOX1,COL4A3,KRT7,ANXA3,SH3GL2,GPX3,RBP4,SOSTDC1,SLC13A3,SLC2A2,ATP6V0A4
Pubmed	15944188	Gonadal sex reversal in mutant Dax1 XY mice: a failure to upregulate Sox9 in pre-Sertoli cells.			Pubmed	0.000483	1	0.0115	0.126	3	31	SOSTDC1,REN,EMX2
Pubmed	27292642	Threshold-Dependent Cooperativity of Pdx1 and Oc1 in Pancreatic Progenitors Establishes Competency for Endocrine Differentiation and ?-Cell Function.			Pubmed	0.000483	1	0.0115	0.126	3	31	SOSTDC1,SLC2A2,CDH1
Pubmed	19736351	Recurrent rearrangements in synaptic and neurodevelopmental genes and shared biologic pathways in schizophrenia, autism, and mental retardation.			Pubmed	0.000483	1	0.0115	0.126	3	31	ERBB4,NLGN1,GABRA2
Pubmed	19898483	Etv4 and Etv5 are required downstream of GDNF and Ret for kidney branching morphogenesis.			Pubmed	0.000483	1	0.0115	0.126	3	31	CALB1,ARG2,LHX1
Pubmed	22889265	Expression of early developmental markers predicts the efficiency of embryonic stem cell differentiation into midbrain dopaminergic neurons.			Pubmed	0.000483	1	0.0115	0.126	3	31	GAD1,FGFR3,CALB1
Pubmed	30818059	Reduced lifespan of mice lacking catalase correlates with altered lipid metabolism without oxidative damage or premature aging.			Pubmed	0.000483	1	0.0115	0.126	3	31	KL,G6PC1,PCK1
Pubmed	15583024	Overview of steroidogenic enzymes in the pathway from cholesterol to active steroid hormones.			Pubmed	0.000483	1	0.0115	0.126	3	31	CYP24A1,CUBN,LRP2
Pubmed	19874574	Genetical genomic determinants of alcohol consumption in rats and humans.			Pubmed	0.000488	1	0.0115	0.126	5	130	GAD1,MAOA,MAOB,ADH6,GABRA2
Pubmed	8620560	Characterization of cadherins expressed by murine thymocytes.			Pubmed	0.000503	1	0.0115	0.126	2	7	CDH1,CDH6
Pubmed	33522480	Dual midbrain and forebrain origins of thalamic inhibitory interneurons.			Pubmed	0.000503	1	0.0115	0.126	2	7	GAD1,PVALB
Pubmed	20235171	Developmental expression of the actin depolymerizing factor ADF in the mouse inner ear and spiral ganglia.			Pubmed	0.000503	1	0.0115	0.126	2	7	PVALB,CALB1
Pubmed	21347296	Evidence for mesenchymal-epithelial transition associated with mouse hepatic stem cell differentiation.			Pubmed	0.000503	1	0.0115	0.126	2	7	KRT7,CDH1
Pubmed	22504067	Neuregulin-1/ErbB4 signaling controls the migration of oligodendrocyte precursor cells during development.			Pubmed	0.000503	1	0.0115	0.126	2	7	ERBB3,ERBB4
Pubmed	27641496	Neuregulin-1/ErbB4 Signaling Regulates Visual Cortical Plasticity.			Pubmed	0.000503	1	0.0115	0.126	2	7	ERBB4,PVALB
Pubmed	16513443	Organic anion transporting polypeptide 1B1 activity classified by SLCO1B1 genotype influences atrasentan pharmacokinetics.			Pubmed	0.000503	1	0.0115	0.126	2	7	CYP3A5,SLC22A2
Pubmed	19924827	Neurogenin1 expression in cell lineages of the cerebellar cortex in embryonic and postnatal mice.			Pubmed	0.000503	1	0.0115	0.126	2	7	CALB1,LHX1
Pubmed	31294445	Loss of Cln5 leads to altered Gad1 expression and deficits in interneuron development in mice.			Pubmed	0.000503	1	0.0115	0.126	2	7	PVALB,CALB1
Pubmed	25038041	p120-catenin-dependent junctional recruitment of Shroom3 is required for apical constriction during lens pit morphogenesis.			Pubmed	0.000503	1	0.0115	0.126	2	7	TFAP2A,CDH1
Pubmed	9165114	Defects of urogenital development in mice lacking Emx2.			Pubmed	0.000503	1	0.0115	0.126	2	7	LHX1,EMX2
Pubmed	11711524	Molecular basis of salt sensitivity in human hypertension. Evaluation of renin-angiotensin-aldosterone system gene polymorphisms.			Pubmed	0.000503	1	0.0115	0.126	2	7	NR3C2,HSD11B2
Pubmed	11711546	Interstitial collagens I, III, and VI sequester and modulate the multifunctional cytokine oncostatin M.			Pubmed	0.000503	1	0.0115	0.126	2	7	COL4A3,COL4A4
Pubmed	19506579	A common variant in DRD3 gene is associated with risperidone-induced extrapyramidal symptoms.			Pubmed	0.000503	1	0.0115	0.126	2	7	MAOA,MAOB
Pubmed	29422532	Type IV collagen ?6 chain is a regulator of keratin 10 in keratinization of oral mucosal epithelium.			Pubmed	0.000503	1	0.0115	0.126	2	7	COL4A3,COL4A4
Pubmed	17376969	Lhx6 activity is required for the normal migration and specification of cortical interneuron subtypes.			Pubmed	0.000503	1	0.0115	0.126	2	7	GAD1,PVALB
Pubmed	31882119	Phenotypic analysis of mice carrying human-type MAFB p.Leu239Pro mutation.			Pubmed	0.000503	1	0.0115	0.126	2	7	NPHS2,NPHS1
Pubmed	1724753	Purification, partial characterization of rat kidney hyaluronic acid binding protein and its localization on the cell surface.			Pubmed	0.000503	1	0.0115	0.126	2	7	COL4A3,COL4A4
Pubmed	25249154	The effects of gestational age and maternal hypoxia on the placental renin angiotensin system in the mouse.			Pubmed	0.000503	1	0.0115	0.126	2	7	REN,ACE2
Pubmed	19609946	Endocrine resistance associated with activated ErbB system in breast cancer cells is reversed by inhibiting MAPK or PI3K/Akt signaling pathways.			Pubmed	0.000503	1	0.0115	0.126	2	7	ERBB3,ERBB4
Pubmed	26385183	Role of Asxl1 in kidney podocyte development via its interaction with Wtip.			Pubmed	0.000503	1	0.0115	0.126	2	7	NPHS2,NPHS1
Pubmed	11839813	Genetic dissection of cadherin function during nephrogenesis.			Pubmed	0.000503	1	0.0115	0.126	2	7	CDH1,CDH6
Pubmed	8006028	Regulation of protease nexin-1 target protease specificity by collagen type IV.			Pubmed	0.000503	1	0.0115	0.126	2	7	COL4A3,COL4A4
Pubmed	14999075	Loss of glutamatergic pyramidal neurons in frontal and temporal cortex resulting from attenuation of FGFR1 signaling is associated with spontaneous hyperactivity in mice.			Pubmed	0.000503	1	0.0115	0.126	2	7	PVALB,CALB1
Pubmed	10416788	Corneal cell proteins and ocular surface pathology.			Pubmed	0.000503	1	0.0115	0.126	2	7	COL4A3,COL4A4
Pubmed	10862700	Area identity shifts in the early cerebral cortex of Emx2-/- mutant mice.			Pubmed	0.000503	1	0.0115	0.126	2	7	EMX2,CDH6
Pubmed	28924206	Ephrin-A2 regulates excitatory neuron differentiation and interneuron migration in the developing neocortex.			Pubmed	0.000503	1	0.0115	0.126	2	7	GAD1,CALB1
Pubmed	27882344	SLIT2/ROBO2 signaling pathway inhibits nonmuscle myosin IIA activity and destabilizes kidney podocyte adhesion.			Pubmed	0.000503	1	0.0115	0.126	2	7	NPHS2,NPHS1
Pubmed	31942002	Combined microRNA and mRNA detection in mammalian retinas by in situ hybridization chain reaction.			Pubmed	0.000503	1	0.0115	0.126	2	7	GAD1,TFAP2A
Pubmed	31285615	A whole-brain map of long-range inputs to GABAergic interneurons in the mouse medial prefrontal cortex.			Pubmed	0.000503	1	0.0115	0.126	2	7	GAD1,PVALB
Pubmed	20662904	Polymorphisms located in the region containing BHMT and BHMT2 genes as maternal protective factors for orofacial clefts.			Pubmed	0.000503	1	0.0115	0.126	2	7	BHMT,BHMT2
Pubmed	24987331	Altered GABAergic markers, increased binocularity and reduced plasticity in the visual cortex of Engrailed-2 knockout mice.			Pubmed	0.000503	1	0.0115	0.126	2	7	GAD1,CALB1
Pubmed	20023653	A robust and high-throughput Cre reporting and characterization system for the whole mouse brain.			Pubmed	0.000503	1	0.0115	0.126	2	7	ERBB4,PVALB
Pubmed	20446891	A comprehensive study of the association between the EGFR and ERBB2 genes and glioma risk.			Pubmed	0.000503	1	0.0115	0.126	2	7	ERBB3,ERBB4
Pubmed	8790740	Cochlear histopathology of the mutant bustling mouse, BUS/Idr.			Pubmed	0.000503	1	0.0115	0.126	2	7	PVALB,CALB1
Pubmed	12764029	Increase in reelin-positive cells in the marginal zone of Pax6 mutant mouse cortex.			Pubmed	0.000503	1	0.0115	0.126	2	7	CALB1,EMX2
Pubmed	8879495	A comprehensive survey of the cadherins expressed in the testes of fetal, immature, and adult mice utilizing the polymerase chain reaction.			Pubmed	0.000503	1	0.0115	0.126	2	7	CDH1,CDH6
Pubmed	31521773	Comparative gene expression analysis of the engulfment and cell motility (ELMO) protein family in the mouse brain.			Pubmed	0.000503	1	0.0115	0.126	2	7	GAD1,CALB1
Pubmed	1383086	Mice develop normally without tenascin.			Pubmed	0.000503	1	0.0115	0.126	2	7	COL4A3,COL4A4
Pubmed	14572467	Cloning and characterization of the mouse AP-2 epsilon gene: a novel family member expressed in the developing olfactory bulb.			Pubmed	0.000503	1	0.0115	0.126	2	7	TFAP2A,TFAP2B
Pubmed	16378758	Expression of coiled-coil protein 1, a novel gene downstream of FGF2, in the developing brain.			Pubmed	0.000503	1	0.0115	0.126	2	7	GAD1,CALB1
Pubmed	15813942	Behavioural phenotypes of hypomorphic KCC2-deficient mice.			Pubmed	0.000503	1	0.0115	0.126	2	7	PVALB,CALB1
Pubmed	17977745	Math5 expression and function in the central auditory system.			Pubmed	0.000503	1	0.0115	0.126	2	7	PVALB,CALB1
Pubmed	20126551	Vertebrate Lrig3-ErbB interactions occur in vitro but are unlikely to play a role in Lrig3-dependent inner ear morphogenesis.			Pubmed	0.000503	1	0.0115	0.126	2	7	ERBB3,ERBB4
Pubmed	19520069	Analysis of polymorphism in renin angiotensin system and other related genes in South Indian chronic kidney disease patients.			Pubmed	0.000503	1	0.0115	0.126	2	7	NPHS2,NPHS1
Pubmed	16288022	CCAAT/enhancer binding protein alpha knock-in mice exhibit early liver glycogen storage and reduced susceptibility to hepatocellular carcinoma.			Pubmed	0.000503	1	0.0115	0.126	2	7	G6PC1,PCK1
Pubmed	30831323	Regulation of the Pancreatic Exocrine Differentiation Program and Morphogenesis by Onecut 1/Hnf6.			Pubmed	0.000503	1	0.0115	0.126	2	7	SPINK1,CDH1
Pubmed	24859262	Elf5 counteracts precocious trophoblast differentiation by maintaining Sox2 and 3 and inhibiting Hand1 expression.			Pubmed	0.000503	1	0.0115	0.126	2	7	MME,KRT7
Pubmed	2573045	Localization of monoamine oxidase A and B genes on the mouse X chromosome.			Pubmed	0.000503	1	0.0115	0.126	2	7	MAOA,MAOB
Pubmed	24954895	Gene-age interactions in blood pressure regulation: a large-scale investigation with the CHARGE, Global BPgen, and ICBP Consortia.			Pubmed	0.000531	1	0.0115	0.126	3	32	SLC17A3,DEFB1,GRB14
Pubmed	27806288	Onset of Spinal Cord Astrocyte Precursor Emigration from the Ventricular Zone Involves the Zeb1 Transcription Factor.			Pubmed	0.000531	1	0.0115	0.126	3	32	FGFR3,SIM1,CDH1
Pubmed	15604093	Automated yeast two-hybrid screening for nuclear receptor-interacting proteins.			Pubmed	0.000541	1	0.0115	0.126	5	133	ESRRG,PPARGC1A,NR3C2,NR1H4,RGN
Pubmed	24658140	The mammalian-membrane two-hybrid assay (MaMTH) for probing membrane-protein interactions in human cells.			Pubmed	0.00056	1	0.0115	0.126	5	134	ERBB3,ERBB4,SH3GL2,FRK,CDH1
Pubmed	18346943	Transcriptional profiling of Wnt4 mutant mouse kidneys identifies genes expressed during nephron formation.			Pubmed	0.000582	1	0.0115	0.126	3	33	PDZK1,FMO1,LHX1
Pubmed	22432025	Comparison of the gene expression profiles from normal and Fgfrl1 deficient mouse kidneys reveals downstream targets of Fgfrl1 signaling.			Pubmed	0.000582	1	0.0115	0.126	3	33	PCP4,CALB1,LHX1
Pubmed	26288816	Fate Specification of Neural Plate Border by Canonical Wnt Signaling and Grhl3 is Crucial for Neural Tube Closure.			Pubmed	0.000582	1	0.0115	0.126	3	33	TFAP2A,EMX2,CDH1
Pubmed	16537572	Nell1-deficient mice have reduced expression of extracellular matrix proteins causing cranial and vertebral defects.			Pubmed	0.000589	1	0.0115	0.126	6	206	NELL1,FGF9,FGFR3,COL4A3,CALB1,NOX4
Pubmed	26220403	14-3-3? coordinates adipogenesis of visceral fat.			Pubmed	0.000636	1	0.0115	0.126	3	34	PPARGC1A,G6PC1,PCK1
Pubmed	20181579	The progenitor zone of the ventral medial ganglionic eminence requires Nkx2-1 to generate most of the globus pallidus but few neocortical interneurons.			Pubmed	0.000636	1	0.0115	0.126	3	34	GAD1,PVALB,CALB1
Pubmed	20510229	Comparative gene expression analysis of genital tubercle development reveals a putative appendicular Wnt7 network for the epidermal differentiation.			Pubmed	0.000636	1	0.0115	0.126	3	34	SOSTDC1,CXCL14,TFAP2B
Pubmed	29987050	Estrogen-regulated feedback loop limits the efficacy of estrogen receptor-targeted breast cancer therapy.			Pubmed	0.000666	1	0.0115	0.126	11	686	GIPC2,CYP24A1,ANGPTL3,FGB,SLC27A2,NEBL,TOM1L1,SLC2A2,SLC22A2,FXYD2,GABRA2
Pubmed	23521771	Mouse Tenm4 is required for mesoderm induction.			Pubmed	0.000668	1	0.0115	0.126	2	8	LHX1,CDH1
Pubmed	17596436	A subpopulation of olfactory bulb GABAergic interneurons is derived from Emx1- and Dlx5/6-expressing progenitors.			Pubmed	0.000668	1	0.0115	0.126	2	8	GAD1,CALB1
Pubmed	31249508	Haploinsufficiency in Mice Suppresses Hippocampal Neuronal Excitability, Excitatory Synaptic Drive, and Long-Term Potentiation, and Spatial Learning and Memory.			Pubmed	0.000668	1	0.0115	0.126	2	8	GAD1,PVALB
Pubmed	25327963	Emx2 expression levels in NSCs modulate astrogenesis rates by regulating EgfR and Fgf9.			Pubmed	0.000668	1	0.0115	0.126	2	8	FGF9,EMX2
Pubmed	21830221	Onecut 1 and Onecut 2 are potential regulators of mouse retinal development.			Pubmed	0.000668	1	0.0115	0.126	2	8	CALB1,LHX1
Pubmed	11319856	Integrin receptors are required for cell survival and proliferation during development of the peripheral glial lineage.			Pubmed	0.000668	1	0.0115	0.126	2	8	TFAP2A,TFAP2B
Pubmed	22376909	Neuregulin repellent signaling via ErbB4 restricts GABAergic interneurons to migratory paths from ganglionic eminence to cortical destinations.			Pubmed	0.000668	1	0.0115	0.126	2	8	GAD1,ERBB4
Pubmed	2037292	Genetic mapping of meander tail, a mouse mutation affecting cerebellar development.			Pubmed	0.000668	1	0.0115	0.126	2	8	TYRP1,CALB1
Pubmed	19924644	Claudins in human cancer: a review.			Pubmed	0.000668	1	0.0115	0.126	2	8	CLDN10,CLDN8
Pubmed	16488402	Differential expression of neuregulins and their receptors in the olfactory bulb layers of the developing mouse.			Pubmed	0.000668	1	0.0115	0.126	2	8	ERBB3,ERBB4
Pubmed	18214987	E protein dosage influences brain development more than family member identity.			Pubmed	0.000668	1	0.0115	0.126	2	8	PVALB,CALB1
Pubmed	16682745	Isolation and characterization of human apolipoprotein M-containing lipoproteins.			Pubmed	0.000668	1	0.0115	0.126	2	8	APOM,CLU
Pubmed	18287934	A methyl-CpG-binding protein 2-enhanced green fluorescent protein reporter mouse model provides a new tool for studying the neuronal basis of Rett syndrome.			Pubmed	0.000668	1	0.0115	0.126	2	8	PVALB,CALB1
Pubmed	20507940	Genotype-phenotype correlations in non-Finnish congenital nephrotic syndrome.			Pubmed	0.000668	1	0.0115	0.126	2	8	NPHS2,NPHS1
[truncated: 38,645 more rows]
