# Supplementary material for: Characterization of Continuous Transcriptional Heterogeneity in High-Risk Blastemal-Type Wilms’ Tumors Using Unsupervised Machine Learning
Source: Int J Mol Sci. 2023 Feb 9;24(4):3532. doi: 10.3390/ijms24043532 (PMC9965420; doi:10.3390/ijms24043532)
Supplement: Supplementary file 1 [file ijms-24-03532-s001.zip › Table S8 - GO enrichment topic2_stromal.xlsx]

## Sheet: Genes list
k2
ABCG1
ACP5
ACTG2
ADA2
ADAM12
ADAMDEC1
ADAP2
ADCY7
ADGRE2
ADORA2B
ADORA3
AHR
ALOX5
ALOX5AP
ANXA1
AOAH
AOC3
APOC1
APOE
AQP9
AREG
ARL4C
ASPN
ATP8B4
BCL2A1
BIN2
BIRC3
BTK
C1QA
C1QB
C1R
C1S
C3
C3AR1
C5AR1
CASP1
CCDC102B
CCL11
CCL18
CCL2
CCL20
CCL4
CCL5
CCL7
CCL8
CCN4
CCR1
CCR2
CCR5
CCRL2
CD14
CD163
CD2
CD28
CD300A
CD36
CD3G
CD44
CD48
CD52
CD53
CD69
CD72
CD84
CD86
CES1
CFD
CFH
CH25H
CHI3L1
CHIT1
CLC
CLEC10A
CLEC2B
CLEC2D
CLEC4A
CLEC5A
CLEC7A
CLIC2
COL10A1
COL11A1
COL14A1
COL15A1
COL16A1
COL1A1
COL1A2
COL5A1
COL8A1
COL8A2
COMP
CPA3
CPM
CR1
CRTAM
CRYBG1
CSF2RA
CSF2RB
CSTA
CTSD
CTSS
CTSZ
CXCL2
CXCL3
CXCL6
CXCL8
CXCL9
CXCR2
CYBB
CYBRD1
CYTIP
DCSTAMP
DENND2D
DHRS9
DNASE2B
DOCK10
DOCK2
DPEP2
DPYD
DUSP10
EGR3
ELL2
EPYC
EREG
EVI2A
EVI2B
FABP4
FAM49A
FAP
FCER1G
FCGR1B
FCGR2A
FCGR2B
FCGR2C
FCGR3B
FCN1
FGF7
FGL2
FGR
FILIP1L
FOLR2
FPR1
FPR3
FYB1
GASK1B
GATA6
GBP2
GEM
GFPT2
GLIPR1
GM2A
GNA15
GPNMB
GPR171
GPR18
GPR183
GPR65
GREM1
GZMA
GZMB
GZMK
HCK
HCLS1
HLA-DMA
HLA-DRB4
HMOX1
HPSE
HRH1
HS3ST2
HSD11B1
HSPA6
IFIH1
IGF1
IGKC
IGLC1
IGSF6
IL10
IL10RA
IL1RN
IL33
IL6
IL7R
INHBA
IRAK3
IRF8
ITGA4
ITGAM
ITGAX
ITGB2
ITK
JCHAIN
KCNE4
KCNMA1
KERA
KLRB1
LAIR1
LAMP3
LAPTM5
LAT2
LCP1
LCP2
LEP
LGALS3
LILRB4
LILRB5
LINC00312
LIPA
LOX
LPXN
LST1
LUM
LY75
LY86
LY96
LYN
LYZ
MAP3K7CL
MAP3K8
2021-03-01
MCTP1
MDFIC
ME1
MEOX2
MFAP5
MGAT4A
MICB
MILR1
MMP1
MMP12
MMP2
MMP9
MMRN1
MNDA
MRC1
MS4A4A
MS4A6A
MSR1
MYO5A
NABP1
NCF2
NCF4
NCKAP1L
NIBAN1
NLRP3
NNMT
NOD2
NPL
NR4A2
NRP2
NT5E
OGN
OLR1
OMD
OSMR
P2RY13
P2RY14
PAPSS2
PDE4B
PDLIM3
PHACTR1
PIEZO2
PIK3CG
PILRA
PLA2G7
PLAC8
PLAUR
PLEK
PLN
PLTP
PLXDC1
PLXNC1
POSTN
PPBP
PRR16
PRRX1
PTAFR
PTGDR
PTGS2
PTPN22
PTPRC
PTPRE
PYGL
RAC2
RARRES1
RASGRP3
RASSF2
RGS1
RNASE2
RNASE6
RUNX1T1
S100A12
S100A8
S100A9
SAMHD1
SAMSN1
SASH3
SCG2
SDS
SELE
SELL
SERPINE1
SERPINF1
SFRP4
SLAMF7
SLAMF8
SLC16A6
SLC1A3
SLC2A3
SLC31A2
SLC38A6
SLC46A3
SLCO2B1
SMPDL3A
SOAT1
SRPX
SRPX2
ST6GALNAC5
ST8SIA4
STEAP1
STK17B
TCIRG1
TDO2
TENT5A
TFEC
THBD
THBS2
THEMIS2
TIMP2
TLR1
TLR2
TLR4
TLR7
TM6SF1
TMEM144
TMEM255A
TNFAIP6
TNFRSF1B
TRAF3IP3
TRAT1
TRBC1
TREM1
TREM2
TRIM22
TWIST1
TYROBP
VAV1
VCAN
VGLL3
VNN1
VSIG4
ZEB2
ZFPM2

## Sheet: Toppgene results
Category	ID	Name	Selected refined	Selected	Source	p-value	q-value Bonferroni	q-value FDR B&H	q-value FDR B&Y	Hit Count in Query List	Hit Count in Genome	Hit in Query List
GO: Molecular Function	GO:0005102	signaling receptor binding				2.02e-19	1.82e-16	1.82e-16	1.34e-15	90	1842	IL10,EREG,INHBA,CLEC7A,LY96,ITGA4,ITGAM,ITGAX,ADA2,ITGB2,FABP4,FGL2,CCR2,S100A8,CCN4,S100A9,TYROBP,S100A12,FAP,SRPX2,PTPRC,TRAT1,FCN1,PIK3CG,SCG2,MICB,CXCL9,AHR,CCL2,FGF7,C3,CCL4,CCL5,GNA15,PLAUR,CCL7,CCL8,CCL11,GPNMB,CCL18,CCL20,FGR,CXCL6,MARCHF1,IL33,DOCK2,COL5A1,COL16A1,COMP,PILRA,ANXA1,FPR1,NR4A2,CCRL2,APOE,LCP1,PPBP,CXCL2,CXCL3,OGN,LEP,AREG,LGALS3,CD2,CD3G,IGF1,TIMP2,PLXNC1,CD86,CD36,JCHAIN,…
GO: Molecular Function	GO:0038023	signaling receptor activity				1.64e-18	1.47e-15	4.91e-16	3.62e-15	81	1587	SLAMF8,IL10RA,IGSF6,CD300A,CLEC7A,P2RY13,EVI2A,TLR7,LY96,ITGA4,PTAFR,ADGRE2,PTGDR,ITGAX,ITGB2,NRP2,NOD2,CCR2,ADORA2B,ADORA3,PTPRC,FCER1G,PTPRE,FCGR1B,FCGR2A,FCGR2B,FCGR3B,CLEC4A,FCN1,HRH1,CCR1,P2RY14,C3AR1,CCL5,PLAUR,CCR5,GPR171,C5AR1,KLRB1,LILRB5,LILRB4,SELE,MRC1,GPR18,GPR65,FOLR2,FPR1,FPR3,NR4A2,CCRL2,GPR183,CR1,MILR1,LGALS3,FCGR2C,THBD,CD2,CD3G,CSF2RA,CSF2RB,CD14,PLXNC1,CD28,CD86,CD36,TLR1,TLR…
GO: Molecular Function	GO:0060089	molecular transducer activity				1.64e-18	1.47e-15	4.91e-16	3.62e-15	81	1587	SLAMF8,IL10RA,IGSF6,CD300A,CLEC7A,P2RY13,EVI2A,TLR7,LY96,ITGA4,PTAFR,ADGRE2,PTGDR,ITGAX,ITGB2,NRP2,NOD2,CCR2,ADORA2B,ADORA3,PTPRC,FCER1G,PTPRE,FCGR1B,FCGR2A,FCGR2B,FCGR3B,CLEC4A,FCN1,HRH1,CCR1,P2RY14,C3AR1,CCL5,PLAUR,CCR5,GPR171,C5AR1,KLRB1,LILRB5,LILRB4,SELE,MRC1,GPR18,GPR65,FOLR2,FPR1,FPR3,NR4A2,CCRL2,GPR183,CR1,MILR1,LGALS3,FCGR2C,THBD,CD2,CD3G,CSF2RA,CSF2RB,CD14,PLXNC1,CD28,CD86,CD36,TLR1,TLR…
GO: Molecular Function	GO:0005539	glycosaminoglycan binding				2.07e-17	1.86e-14	4.65e-15	3.43e-14	31	252	CFH,ADGRE2,ITGAM,ADA2,NRP2,NOD2,CCN4,PTPRC,CCL2,FGF7,CCL5,CCL7,CCL8,GPNMB,CXCL6,SELL,COL5A1,COL11A1,COMP,EPYC,APOE,NLRP3,POSTN,THBS2,CD14,VCAN,JCHAIN,TLR2,CD44,TREM2,TNFAIP6
GO: Molecular Function	GO:0008009	chemokine activity		1		1.27e-13	1.14e-10	2.28e-11	1.68e-10	14	50	CXCL9,CCL2,CCL4,CCL5,CCL7,CCL8,CCL11,CCL18,CCL20,CXCL6,PPBP,CXCL2,CXCL3,CXCL8
GO: Molecular Function	GO:0042379	chemokine receptor binding				1.85e-13	1.66e-10	2.77e-11	2.04e-10	16	74	CCR2,CXCL9,CCL2,CCL4,CCL5,CCL7,CCL8,CCL11,CCL18,CCL20,CXCL6,CCRL2,PPBP,CXCL2,CXCL3,CXCL8
GO: Molecular Function	GO:0005201	extracellular matrix structural constituent	1	1		2.54e-13	2.29e-10	3.27e-11	2.41e-10	23	185	ASPN,CHI3L1,FGL2,SRPX2,COL14A1,SRPX,COL1A1,COL1A2,COL5A1,COL8A1,COL8A2,COL10A1,COL11A1,COL15A1,COL16A1,COMP,OGN,MMRN1,POSTN,MFAP5,THBS2,VCAN,LUM
GO: Molecular Function	GO:0038187	pattern recognition receptor activity				2.57e-12	2.31e-09	2.89e-10	2.13e-09	10	23	CLEC7A,TLR7,LY96,PTAFR,NOD2,FCN1,CD14,CD36,TLR2,TLR4
GO: Molecular Function	GO:0004888	transmembrane signaling receptor activity				6.57e-12	5.91e-09	6.56e-10	4.84e-09	61	1331	IL10RA,IGSF6,CD300A,P2RY13,EVI2A,TLR7,PTAFR,ADGRE2,PTGDR,ITGB2,NRP2,CCR2,ADORA2B,ADORA3,PTPRC,FCER1G,PTPRE,FCGR1B,FCGR2A,FCGR2B,FCGR3B,CLEC4A,HRH1,CCR1,P2RY14,C3AR1,CCR5,GPR171,C5AR1,KLRB1,LILRB5,LILRB4,SELE,MRC1,GPR18,GPR65,FPR1,FPR3,CCRL2,GPR183,CR1,MILR1,FCGR2C,THBD,CD3G,CSF2RA,CSF2RB,CD14,PLXNC1,TLR1,TLR2,TLR4,CD44,CLEC2D,TREM2,CD69,CD72,OSMR,TNFRSF1B,IL7R,CXCR2
GO: Molecular Function	GO:0140375	immune receptor activity	1	1		7.48e-12	6.73e-09	6.73e-10	4.97e-09	19	141	IL10RA,CCR2,FCER1G,FCGR1B,FCGR2B,CCR1,C3AR1,CCR5,C5AR1,FPR1,FPR3,CCRL2,CR1,CSF2RA,CSF2RB,CD44,OSMR,IL7R,CXCR2
GO: Molecular Function	GO:0008201	heparin binding				8.37e-11	7.52e-08	6.84e-09	5.05e-08	20	181	CFH,ITGAM,ADA2,NRP2,CCN4,PTPRC,CCL2,FGF7,CCL5,CCL7,CCL8,GPNMB,CXCL6,SELL,COL5A1,COL11A1,COMP,APOE,POSTN,THBS2
GO: Molecular Function	GO:0005125	cytokine activity		1		3.1e-10	2.79e-07	2.32e-08	1.71e-07	22	238	IL10,INHBA,SCG2,CXCL9,CCL2,CCL4,CCL5,CCL7,CCL8,CCL11,CCL18,CCL20,CXCL6,IL33,PPBP,CXCL2,CXCL3,AREG,GREM1,IL1RN,IL6,CXCL8
GO: Molecular Function	GO:0043394	proteoglycan binding				3.64e-10	3.28e-07	2.52e-08	1.86e-07	11	46	CFH,ITGAM,HPSE,ADA2,PTPRC,GPNMB,COL5A1,COMP,APOE,GREM1,CTSS
GO: Molecular Function	GO:0005126	cytokine receptor binding				6.57e-10	5.91e-07	4.22e-08	3.12e-07	24	295	IL10,CCR2,CXCL9,CCL2,CCL4,CCL5,CCL7,CCL8,CCL11,CCL18,CCL20,CXCL6,IL33,CCRL2,PPBP,CXCL2,CXCL3,CD44,GREM1,OSMR,LYN,IL1RN,IL6,CXCL8
GO: Molecular Function	GO:0030020	extracellular matrix structural constituent conferring tensile strength				2.45e-09	2.2e-06	1.47e-07	1.08e-06	10	42	COL14A1,COL1A1,COL1A2,COL5A1,COL8A1,COL8A2,COL10A1,COL11A1,COL15A1,COL16A1
GO: Molecular Function	GO:0001848	complement binding		1		3.12e-09	2.8e-06	1.75e-07	1.29e-06	9	32	CFH,VSIG4,ITGAM,ITGB2,C3AR1,C5AR1,FPR1,FPR3,CR1
GO: Molecular Function	GO:1901681	sulfur compound binding				3.42e-09	3.08e-06	1.81e-07	1.34e-06	23	295	CFH,ADGRE2,ITGAM,ADA2,NRP2,CCN4,PTPRC,CCL2,FGF7,CCL5,CCL7,CCL8,GPNMB,CXCL6,SELL,COL5A1,COL11A1,COMP,APOE,POSTN,THBS2,GREM1,SOAT1
GO: Molecular Function	GO:0019955	cytokine binding		1		5.35e-09	4.81e-06	2.67e-07	1.97e-06	18	184	IL10RA,ITGA4,NRP2,CCR2,CCR1,CCR5,COMP,CCRL2,CSF2RA,CSF2RB,CD36,CD44,GREM1,OSMR,TNFRSF1B,IL1RN,IL7R,CXCR2
GO: Molecular Function	GO:0048018	receptor ligand activity				7.2e-09	6.48e-06	3.41e-07	2.52e-06	30	501	IL10,EREG,INHBA,ADA2,SCG2,CXCL9,CCL2,FGF7,CCL4,CCL5,CCL7,CCL8,CCL11,GPNMB,CCL18,CCL20,CXCL6,IL33,PPBP,CXCL2,CXCL3,OGN,LEP,AREG,LGALS3,IGF1,GREM1,IL1RN,IL6,CXCL8
GO: Molecular Function	GO:0030546	signaling receptor activator activity				8.64e-09	7.77e-06	3.88e-07	2.87e-06	30	505	IL10,EREG,INHBA,ADA2,SCG2,CXCL9,CCL2,FGF7,CCL4,CCL5,CCL7,CCL8,CCL11,GPNMB,CCL18,CCL20,CXCL6,IL33,PPBP,CXCL2,CXCL3,OGN,LEP,AREG,LGALS3,IGF1,GREM1,IL1RN,IL6,CXCL8
GO: Molecular Function	GO:0001851	complement component C3b binding				1.02e-08	9.15e-06	4.36e-07	3.22e-06	5	6	CFH,VSIG4,ITGAM,ITGB2,CR1
GO: Molecular Function	GO:0019864	IgG binding		1		1.29e-08	1.16e-05	5.28e-07	3.9e-06	6	11	FCER1G,FCGR1B,FCGR2A,FCGR2B,FCGR3B,FCGR2C
GO: Molecular Function	GO:0048020	CCR chemokine receptor binding				1.51e-08	1.35e-05	5.89e-07	4.35e-06	10	50	CCR2,CCL2,CCL4,CCL5,CCL7,CCL8,CCL11,CCL18,CCL20,CCRL2
GO: Molecular Function	GO:0030246	carbohydrate binding				1.7e-08	1.53e-05	6.36e-07	4.69e-06	22	295	CLEC5A,CLEC7A,CHI3L1,CLC,CLEC4A,FCN1,CRYBG1,PYGL,CLEC10A,KLRB1,CLEC2B,SELE,SELL,MRC1,OLR1,SLC2A3,LGALS3,VCAN,CLEC2D,CD69,CD72,LY75
GO: Molecular Function	GO:0030545	signaling receptor regulator activity				1.86e-08	1.67e-05	6.69e-07	4.93e-06	31	553	IL10,EREG,INHBA,ADA2,SCG2,CXCL9,CCL2,FGF7,CCL4,CCL5,CCL7,CCL8,CCL11,GPNMB,CCL18,CCL20,CXCL6,IL33,LILRB4,PPBP,CXCL2,CXCL3,OGN,LEP,AREG,LGALS3,IGF1,GREM1,IL1RN,IL6,CXCL8
GO: Molecular Function	GO:0001846	opsonin binding				3.35e-08	3.01e-05	1.16e-06	8.54e-06	7	20	CFH,VSIG4,ITGAM,ITGB2,C5AR1,CR1,CD14
GO: Molecular Function	GO:0035325	Toll-like receptor binding				4.66e-08	4.19e-05	1.55e-06	1.14e-05	6	13	LY96,S100A8,S100A9,CD36,TLR1,TLR2
GO: Molecular Function	GO:0019865	immunoglobulin binding		1		5.06e-08	4.55e-05	1.63e-06	1.2e-05	8	31	FCER1G,FCGR1B,FCGR2A,FCGR2B,FCGR3B,LGALS3,FCGR2C,JCHAIN
GO: Molecular Function	GO:0001664	G protein-coupled receptor binding				3.13e-07	0.000282	9.72e-06	7.17e-05	21	320	ADA2,CCR2,FCN1,CXCL9,CCL2,C3,CCL4,CCL5,GNA15,CCL7,CCL8,CCL11,CCL18,CCL20,CXCL6,FPR1,CCRL2,PPBP,CXCL2,CXCL3,CXCL8
GO: Molecular Function	GO:0008289	lipid binding				4.46e-07	0.000401	1.34e-05	9.85e-05	37	846	CD300A,NCF4,LY96,PTAFR,FABP4,S100A8,S100A9,VNN1,RASGRP3,BTK,C3,BIN2,HSD11B1,PLTP,ALOX5AP,SELL,PLA2G7,COMP,ANXA1,APOC1,GPR183,APOE,ABCG1,RNASE2,IGF1,MCTP1,CD14,CD36,JCHAIN,TLR1,TLR2,TLR4,TREM2,LYN,FYB1,SOAT1,ADAP2
GO: Molecular Function	GO:0045236	CXCR chemokine receptor binding				4.67e-07	0.00042	1.36e-05	0.0001	6	18	CXCL9,CXCL6,PPBP,CXCL2,CXCL3,CXCL8
GO: Molecular Function	GO:0001875	lipopolysaccharide immune receptor activity		1		4.83e-07	0.000434	1.36e-05	0.0001	4	5	LY96,PTAFR,TLR2,TLR4
GO: Molecular Function	GO:0042834	peptidoglycan binding				6.73e-07	0.000605	1.83e-05	0.000135	6	19	NOD2,NLRP3,CD14,JCHAIN,TLR2,TREM2
GO: Molecular Function	GO:0005178	integrin binding		1		8.51e-07	0.000765	2.25e-05	0.000166	14	157	ITGA4,ITGAM,ITGAX,ITGB2,CCN4,FAP,GPNMB,COL5A1,COL16A1,COMP,LCP1,IGF1,TIMP2,LYN
GO: Molecular Function	GO:0004896	cytokine receptor activity		1		1.21e-06	0.00109	3.07e-05	0.000227	11	97	IL10RA,CCR2,CCR1,CCR5,CCRL2,CSF2RA,CSF2RB,CD44,OSMR,IL7R,CXCR2
GO: Molecular Function	GO:0004875	complement receptor activity				1.23e-06	0.00111	3.07e-05	0.000227	5	12	C3AR1,C5AR1,FPR1,FPR3,CR1
GO: Molecular Function	GO:0044877	protein-containing complex binding				1.81e-06	0.00163	4.41e-05	0.000325	54	1565	HLA-DMA,MYO5A,INHBA,ASPN,BCL2A1,ITGA4,ITGAM,ITGAX,ITGB2,NOD2,IFIH1,CCN4,FAP,PTPRC,FCER1G,FCGR1B,FCGR2A,FCGR2B,FCGR3B,KCNMA1,AHR,COL14A1,GNA15,GPNMB,FGR,MMP9,MMP12,PLTP,ALOX5AP,DOCK2,COL5A1,COL16A1,COMP,APOE,LCP1,OLR1,LGALS3,MSR1,FCGR2C,CD3G,IGF1,TIMP2,LOX,CD36,JCHAIN,TLR2,CD44,TREM2,LUM,LYN,FYB1,CTSS,HCLS1,NCKAP1L
GO: Molecular Function	GO:0070891	lipoteichoic acid binding				3.29e-06	0.00296	7.78e-05	0.000574	4	7	CD14,CD36,TLR2,TREM2
GO: Molecular Function	GO:0001530	lipopolysaccharide binding		1		3.43e-06	0.00308	7.9e-05	0.000583	7	37	LY96,PTAFR,RNASE2,CD14,TLR2,TLR4,TREM2
GO: Molecular Function	GO:0043395	heparan sulfate proteoglycan binding				4.01e-06	0.00361	9.02e-05	0.000666	6	25	CFH,ITGAM,PTPRC,COMP,APOE,GREM1
GO: Molecular Function	GO:0001540	amyloid-beta binding				4.47e-06	0.00402	9.81e-05	0.000724	10	90	ITGAM,ITGB2,FCGR2B,C1QA,APOE,MSR1,CD36,TLR2,TLR4,TREM2
GO: Molecular Function	GO:0071791	chemokine (C-C motif) ligand 5 binding				5.67e-06	0.00509	0.000121	0.000895	3	3	CCR2,CCR1,CCR5
GO: Molecular Function	GO:0016298	lipase activity				9.41e-06	0.00846	0.000197	0.00145	13	167	CES1,HMOX1,CLC,SMPDL3A,GM2A,CCR1,CCL5,CCR5,CCL8,PLA2G7,ANXA1,APOC1,LIPA
GO: Molecular Function	GO:0033218	amide binding				1.47e-05	0.0132	0.000298	0.0022	25	542	INHBA,ITGAM,ITGB2,NOD2,CCR2,FCGR2B,C1QA,CCR1,CCR5,PLTP,FOLR2,FPR1,FPR3,CCRL2,APOE,MSR1,CD14,CD36,TLR1,TLR2,TLR4,TREM2,CTSD,SOAT1,CXCR2
GO: Molecular Function	GO:0005518	collagen binding	1	1		1.49e-05	0.0134	0.000298	0.0022	9	82	ASPN,COL14A1,MMP9,MMP12,COMP,LOX,CD44,LUM,CTSS
GO: Molecular Function	GO:0042277	peptide binding				2.15e-05	0.0193	0.000419	0.00309	22	452	INHBA,ITGAM,ITGB2,NOD2,CCR2,FCGR2B,C1QA,CCR1,CCR5,FPR1,FPR3,CCRL2,APOE,MSR1,CD14,CD36,TLR1,TLR2,TLR4,TREM2,CTSD,CXCR2
GO: Molecular Function	GO:0004620	phospholipase activity				3.43e-05	0.0309	0.000656	0.00484	11	137	HMOX1,CLC,SMPDL3A,GM2A,CCR1,CCL5,CCR5,CCL8,PLA2G7,ANXA1,APOC1
GO: Molecular Function	GO:0050786	RAGE receptor binding				4.33e-05	0.039	0.0008	0.0059	4	12	S100A8,S100A9,S100A12,FPR1
GO: Molecular Function	GO:0019956	chemokine binding				4.4e-05	0.0396	0.0008	0.0059	6	37	ITGA4,CCR2,CCR1,CCR5,CCRL2,CXCR2
GO: Molecular Function	GO:0016493	C-C chemokine receptor activity				4.45e-05	0.04	0.0008	0.0059	5	23	CCR2,CCR1,CCR5,CCRL2,CXCR2
GO: Molecular Function	GO:0019838	growth factor binding				4.85e-05	0.0436	0.000855	0.00631	12	168	IL10RA,NRP2,CCN4,SRPX2,COL1A1,COL1A2,COL5A1,CSF2RB,CD36,OSMR,IL1RN,IL7R
GO: Molecular Function	GO:0001847	opsonin receptor activity				5.42e-05	0.0487	0.000919	0.00678	3	5	C5AR1,CR1,CD14
GO: Molecular Function	GO:0035662	Toll-like receptor 4 binding				5.42e-05	0.0487	0.000919	0.00678	3	5	LY96,S100A8,S100A9
GO: Molecular Function	GO:0019957	C-C chemokine binding				6.83e-05	0.0614	0.00114	0.00838	5	25	CCR2,CCR1,CCR5,CCRL2,CXCR2
GO: Molecular Function	GO:0001637	G protein-coupled chemoattractant receptor activity				8.33e-05	0.0749	0.00134	0.00986	5	26	CCR2,CCR1,CCR5,CCRL2,CXCR2
GO: Molecular Function	GO:0004950	chemokine receptor activity				8.33e-05	0.0749	0.00134	0.00986	5	26	CCR2,CCR1,CCR5,CCRL2,CXCR2
GO: Molecular Function	GO:0045028	G protein-coupled purinergic nucleotide receptor activity				8.52e-05	0.0766	0.00134	0.00992	4	14	P2RY13,PTAFR,P2RY14,GPR171
GO: Molecular Function	GO:0030169	low-density lipoprotein particle binding				0.000101	0.0905	0.00155	0.0114	5	27	PLTP,OLR1,MSR1,CD36,TREM2
GO: Molecular Function	GO:0038024	cargo receptor activity				0.000104	0.0936	0.00155	0.0114	8	82	ITGAM,ITGB2,CD163,MRC1,FOLR2,OLR1,MSR1,CD36
GO: Molecular Function	GO:0071813	lipoprotein particle binding				0.000106	0.0949	0.00155	0.0114	6	43	PLTP,APOE,OLR1,MSR1,CD36,TREM2
GO: Molecular Function	GO:0071814	protein-lipid complex binding				0.000106	0.0949	0.00155	0.0114	6	43	PLTP,APOE,OLR1,MSR1,CD36,TREM2
GO: Molecular Function	GO:0031726	CCR1 chemokine receptor binding				0.000107	0.0961	0.00155	0.0114	3	6	CCL4,CCL5,CCL7
GO: Molecular Function	GO:0031727	CCR2 chemokine receptor binding				0.000185	0.166	0.00264	0.0194	3	7	CCR2,CCL2,CCL7
GO: Molecular Function	GO:0008083	growth factor activity				0.000194	0.174	0.00269	0.0198	11	166	IL10,EREG,INHBA,ADA2,FGF7,PPBP,OGN,LEP,AREG,IGF1,IL6
GO: Molecular Function	GO:0036041	long-chain fatty acid binding				0.000194	0.175	0.00269	0.0198	4	17	FABP4,S100A8,S100A9,ALOX5AP
GO: Molecular Function	GO:0005504	fatty acid binding				0.000197	0.177	0.00269	0.0198	6	48	FABP4,S100A8,S100A9,ALOX5AP,APOC1,CD36
GO: Molecular Function	GO:0004175	endopeptidase activity				0.000211	0.19	0.00283	0.0209	25	640	SERPINF1,CFD,FAP,CLC,ADAMDEC1,C1R,C1S,C3,MMP1,MMP2,MMP9,MMP12,RARRES1,CASP1,BIRC3,ADAM12,TIMP2,GZMA,GZMB,GZMK,SERPINE1,CSTA,CTSD,CTSS,CTSZ
GO: Molecular Function	GO:0031406	carboxylic acid binding				0.000286	0.257	0.00374	0.0276	14	264	PTGDR,FABP4,S100A8,S100A9,FCN1,PYGL,ST8SIA4,ALOX5AP,SELE,FOLR2,APOC1,TDO2,SLC1A3,CD36
GO: Molecular Function	GO:0050544	arachidonic acid binding				0.000292	0.262	0.00374	0.0276	3	8	S100A8,S100A9,ALOX5AP
GO: Molecular Function	GO:0019763	immunoglobulin receptor activity				0.000292	0.262	0.00374	0.0276	3	8	FCER1G,FCGR1B,FCGR2B
GO: Molecular Function	GO:0004051	arachidonate 5-lipoxygenase activity				0.000321	0.288	0.00395	0.0291	2	2	ALOX5,ALOX5AP
GO: Molecular Function	GO:0042497	triacyl lipopeptide binding				0.000321	0.288	0.00395	0.0291	2	2	TLR1,TLR2
GO: Molecular Function	GO:0035717	chemokine (C-C motif) ligand 7 binding				0.000321	0.288	0.00395	0.0291	2	2	CCR2,CCR1
GO: Molecular Function	GO:0001968	fibronectin binding				0.000413	0.371	0.00501	0.037	5	36	ITGA4,MMP2,MMP9,COMP,CTSS
GO: Molecular Function	GO:0050543	icosatetraenoic acid binding				0.000432	0.388	0.00517	0.0382	3	9	S100A8,S100A9,ALOX5AP
GO: Molecular Function	GO:0016502	nucleotide receptor activity				0.000462	0.415	0.00539	0.0398	4	21	P2RY13,PTAFR,P2RY14,GPR171
GO: Molecular Function	GO:0001614	purinergic nucleotide receptor activity				0.000462	0.415	0.00539	0.0398	4	21	P2RY13,PTAFR,P2RY14,GPR171
GO: Molecular Function	GO:0042056	chemoattractant activity				0.000603	0.542	0.00692	0.0511	5	39	SCG2,FGF7,CCL5,GPNMB,LGALS3
GO: Molecular Function	GO:0071723	lipopeptide binding				0.000608	0.547	0.00692	0.0511	3	10	CD14,TLR1,TLR2
GO: Molecular Function	GO:0030021	extracellular matrix structural constituent conferring compression resistance				0.000664	0.597	0.00746	0.0551	4	23	ASPN,OGN,VCAN,LUM
GO: Molecular Function	GO:0050542	icosanoid binding				0.000786	0.707	0.00872	0.0644	4	24	PTGDR,S100A8,S100A9,ALOX5AP
GO: Molecular Function	GO:0005198	structural molecule activity				0.000833	0.749	0.00914	0.0674	26	743	ASPN,HMOX1,CHI3L1,FGL2,SRPX2,PDLIM3,COL14A1,SRPX,COL1A1,COL1A2,COL5A1,COL8A1,COL8A2,COL10A1,COL11A1,COL15A1,COL16A1,COMP,APOE,OGN,MMRN1,POSTN,MFAP5,THBS2,VCAN,LUM
GO: Molecular Function	GO:0008233	peptidase activity				0.000876	0.788	0.00949	0.07	29	868	SERPINF1,FGL2,CFD,FAP,CLC,ADAMDEC1,DPEP2,C1R,C1S,C3,MMP1,MMP2,MMP9,MMP12,RARRES1,CASP1,BIRC3,CPA3,CPM,ADAM12,TIMP2,GZMA,GZMB,GZMK,SERPINE1,CSTA,CTSD,CTSS,CTSZ
GO: Molecular Function	GO:0034988	Fc-gamma receptor I complex binding				0.000934	0.839	0.00987	0.0729	2	3	FGR,LGALS3
GO: Molecular Function	GO:0001850	complement component C3a binding				0.000934	0.839	0.00987	0.0729	2	3	C3AR1,CR1
GO: Molecular Function	GO:0016004	phospholipase activator activity				0.00109	0.977	0.0114	0.0838	3	12	GM2A,CCL5,CCL8
GO: Molecular Function	GO:0005496	steroid binding				0.0011	0.992	0.0114	0.0841	8	116	HSD11B1,PLTP,COMP,GPR183,APOE,ABCG1,IGF1,SOAT1
GO: Molecular Function	GO:0033293	monocarboxylic acid binding				0.00119	1	0.0121	0.0896	7	91	FABP4,S100A8,S100A9,PYGL,ALOX5AP,APOC1,CD36
GO: Molecular Function	GO:0016702	oxidoreductase activity, acting on single donors with incorporation of molecular oxygen, incorporation of two atoms of oxygen				0.00125	1	0.0126	0.0928	4	27	PTGS2,ALOX5,ALOX5AP,TDO2
GO: Molecular Function	GO:0060090	molecular adaptor activity				0.00126	1	0.0126	0.0929	18	451	NCF4,ITGAM,ITGB2,TRIM22,CD163,TRAT1,COL14A1,COL1A2,MRC1,COL8A2,COL11A1,FOLR2,OLR1,MSR1,CD3G,CD36,JCHAIN,ADAP2
GO: Molecular Function	GO:0008237	metallopeptidase activity				0.00129	1	0.0127	0.0936	11	208	ADAMDEC1,DPEP2,MMP1,MMP2,MMP9,MMP12,RARRES1,CPA3,CPM,ADAM12,TIMP2
GO: Molecular Function	GO:0004715	non-membrane spanning protein tyrosine kinase activity				0.0013	1	0.0127	0.0936	5	46	ITK,BTK,FGR,LYN,HCK
GO: Molecular Function	GO:0048407	platelet-derived growth factor binding				0.00139	1	0.0135	0.0994	3	13	COL1A1,COL1A2,COL5A1
GO: Molecular Function	GO:0016701	oxidoreductase activity, acting on single donors with incorporation of molecular oxygen				0.00143	1	0.0137	0.101	4	28	PTGS2,ALOX5,ALOX5AP,TDO2
GO: Molecular Function	GO:0060229	lipase activator activity				0.00175	1	0.0166	0.122	3	14	GM2A,CCL5,CCL8
GO: Molecular Function	GO:0016788	hydrolase activity, acting on ester bonds				0.00191	1	0.0179	0.132	29	914	PDE4B,CES1,ACP5,PTPN22,HMOX1,ZEB2,NOD2,DNASE2B,CLC,PTPRC,PTPRE,SMPDL3A,GM2A,CCR1,CCL5,CCR5,CCL8,PLA2G7,NT5E,ANXA1,AOAH,SAMHD1,APOC1,LGALS3,LIPA,RNASE2,RNASE6,DUSP10,PHACTR1
GO: Molecular Function	GO:0004222	metalloendopeptidase activity				0.00197	1	0.0182	0.135	8	127	ADAMDEC1,MMP1,MMP2,MMP9,MMP12,RARRES1,ADAM12,TIMP2
GO: Molecular Function	GO:0070851	growth factor receptor binding				0.00202	1	0.0185	0.137	9	157	IL10,EREG,FGF7,AREG,CD44,GREM1,LYN,IL1RN,IL6
GO: Molecular Function	GO:0015026	coreceptor activity				0.00226	1	0.0205	0.151	5	52	LY96,ITGA4,CCR5,CD28,CD86
GO: Molecular Function	GO:0051861	glycolipid binding				0.00238	1	0.0214	0.158	4	32	VNN1,PLTP,SELL,LYN
GO: Molecular Function	GO:0050135	NAD(P)+ nucleosidase activity				0.00262	1	0.0225	0.166	3	16	TLR1,TLR2,TLR4
GO: Molecular Function	GO:0061809	NAD+ nucleotidase, cyclic ADP-ribose generating				0.00262	1	0.0225	0.166	3	16	TLR1,TLR2,TLR4
GO: Molecular Function	GO:0061812	cyclic ADP-ribose hydrolase				0.00262	1	0.0225	0.166	3	16	TLR1,TLR2,TLR4
GO: Molecular Function	GO:0061811	ADP-ribosyl cyclase activity				0.00262	1	0.0225	0.166	3	16	TLR1,TLR2,TLR4
GO: Molecular Function	GO:0008035	high-density lipoprotein particle binding				0.00262	1	0.0225	0.166	3	16	PLTP,CD36,TREM2
GO: Molecular Function	GO:0002054	nucleobase binding				0.00304	1	0.0253	0.187	2	5	PYGL,DPYD
GO: Molecular Function	GO:0019863	IgE binding				0.00304	1	0.0253	0.187	2	5	FCER1G,LGALS3
GO: Molecular Function	GO:0004982	N-formyl peptide receptor activity				0.00304	1	0.0253	0.187	2	5	FPR1,FPR3
GO: Molecular Function	GO:0003953	NAD+ nucleosidase activity				0.00314	1	0.0257	0.19	3	17	TLR1,TLR2,TLR4
GO: Molecular Function	GO:0070492	oligosaccharide binding				0.00314	1	0.0257	0.19	3	17	SELE,SELL,LGALS3
GO: Molecular Function	GO:0034987	immunoglobulin receptor binding				0.0032	1	0.0259	0.191	6	81	FGR,LGALS3,JCHAIN,IGKC,IGLC1,TRBC1
GO: Molecular Function	GO:0004252	serine-type endopeptidase activity				0.00348	1	0.0279	0.206	12	271	SERPINF1,CFD,FAP,C1R,C1S,MMP1,MMP2,MMP9,GZMA,GZMB,GZMK,SERPINE1
GO: Molecular Function	GO:0016798	hydrolase activity, acting on glycosyl bonds				0.0036	1	0.0286	0.211	8	140	CHI3L1,CHIT1,HPSE,GM2A,TLR1,TLR2,TLR4,LYZ
GO: Molecular Function	GO:0016175	superoxide-generating NAD(P)H oxidase activity				0.00372	1	0.0294	0.217	3	18	CYBB,NCF2,NCF4
GO: Molecular Function	GO:0002020	protease binding				0.00416	1	0.0323	0.238	14	350	SERPINF1,FAP,C3,COL1A1,COL1A2,SELL,RARRES1,COMP,CASP1,BIRC3,TIMP2,CD28,SERPINE1,CSTA
GO: Molecular Function	GO:0005319	lipid transporter activity				0.00417	1	0.0323	0.238	9	175	ATP8B4,SLCO2B1,FABP4,GM2A,PLTP,APOE,SLC1A3,ABCG1,CD36
GO: Molecular Function	GO:0004568	chitinase activity				0.00451	1	0.034	0.251	2	6	CHI3L1,CHIT1
GO: Molecular Function	GO:0060228	phosphatidylcholine-sterol O-acyltransferase activator activity				0.00451	1	0.034	0.251	2	6	APOC1,APOE
GO: Molecular Function	GO:0001609	G protein-coupled adenosine receptor activity				0.00451	1	0.034	0.251	2	6	ADORA2B,ADORA3
GO: Molecular Function	GO:0004713	protein tyrosine kinase activity				0.00464	1	0.0347	0.256	8	146	ITK,NRP2,BTK,CCL5,FGR,LILRB4,LYN,HCK
GO: Molecular Function	GO:0015144	carbohydrate transmembrane transporter activity				0.00494	1	0.0367	0.271	4	39	TMEM144,PPBP,AQP9,SLC2A3
GO: Molecular Function	GO:0008236	serine-type peptidase activity				0.00578	1	0.0426	0.314	12	289	SERPINF1,CFD,FAP,C1R,C1S,MMP1,MMP2,MMP9,GZMA,GZMB,GZMK,SERPINE1
GO: Molecular Function	GO:0016209	antioxidant activity				0.00598	1	0.0434	0.32	6	92	PTGS2,S100A8,S100A9,CLIC2,ALOX5AP,APOE
GO: Molecular Function	GO:0005509	calcium ion binding				0.00598	1	0.0434	0.32	24	773	MYO5A,ASPN,ADGRE2,S100A8,S100A9,S100A12,CLEC4A,RASGRP3,C1R,C1S,MMP12,SELE,SELL,COMP,ANXA1,AOAH,LCP1,MMRN1,THBD,THBS2,MCTP1,VCAN,AOC3,CD69
GO: Molecular Function	GO:0004607	phosphatidylcholine-sterol O-acyltransferase activity				0.00623	1	0.0441	0.326	2	7	APOC1,APOE
GO: Molecular Function	GO:0034189	very-low-density lipoprotein particle binding				0.00623	1	0.0441	0.326	2	7	PLTP,TREM2
GO: Molecular Function	GO:0140031	phosphorylation-dependent protein binding				0.00623	1	0.0441	0.326	2	7	VAV1,LYN
GO: Molecular Function	GO:0017171	serine hydrolase activity				0.00659	1	0.0463	0.342	12	294	SERPINF1,CFD,FAP,C1R,C1S,MMP1,MMP2,MMP9,GZMA,GZMB,GZMK,SERPINE1
GO: Molecular Function	GO:0120020	cholesterol transfer activity				0.00667	1	0.0465	0.343	3	22	PLTP,APOE,ABCG1
GO: Biological Process	GO:0006952	defense response		1		8.54e-68	4.87e-64	4.87e-64	4.49e-63	156	1935	CYBB,SLAMF8,IL10,CFH,EREG,INHBA,CLEC5A,CD300A,ACP5,HLA-DRB4,SERPINF1,VSIG4,CLEC7A,TCIRG1,GBP2,PTPN22,NCF2,TLR7,HMOX1,LY96,CHI3L1,PTAFR,ADGRE2,PTGDR,ITGAM,ITGAX,ITGB2,TRIM22,PTGS2,ADCY7,CD163,PLAC8,ITK,FABP4,FGL2,LAPTM5,NOD2,CD84,CCR2,IFIH1,S100A8,ADORA2B,CCN4,S100A9,TYROBP,CFD,S100A12,ADORA3,PTPRC,FCER1G,FCGR1B,TRAT1,FCGR2B,CLEC4A,FCN1,VNN1,PIK3CG,SCG2,MICB,BTK,CXCL9,HRH1,C1QA,C1QB,C1R,CCL2,C1S,C…
GO: Biological Process	GO:0001775	cell activation				4.27e-67	2.43e-63	1.22e-63	1.12e-62	144	1623	CYBB,SLAMF8,IL10,CFH,ATP8B4,HLA-DMA,INHBA,CLEC5A,CD300A,VSIG4,CLEC7A,TCIRG1,PTPN22,TLR7,HMOX1,CHI3L1,DCSTAMP,ITGA4,PTAFR,SAMSN1,CHIT1,ADGRE2,PTGDR,ITGAM,HPSE,ITGAX,ADA2,ITGB2,PLAC8,ITK,FGL2,LAPTM5,NOD2,CD84,CCR2,S100A8,ADORA2B,S100A9,TYROBP,CFD,S100A12,CLC,PTPRC,FCER1G,PTPRE,FCGR2A,FCGR2B,FCGR3B,CLEC4A,SASH3,FCN1,VNN1,PIK3CG,MICB,BTK,AHR,C1QA,GM2A,CCL2,PYGL,C3,C3AR1,CCL5,GNA15,PLAUR,BIN2,C5AR1,GP…
GO: Biological Process	GO:0045321	leukocyte activation		1		6.35e-66	3.62e-62	1.21e-62	1.11e-61	136	1447	CYBB,SLAMF8,IL10,ATP8B4,HLA-DMA,INHBA,CLEC5A,CD300A,VSIG4,CLEC7A,TCIRG1,PTPN22,TLR7,HMOX1,CHI3L1,DCSTAMP,ITGA4,PTAFR,SAMSN1,CHIT1,ADGRE2,PTGDR,ITGAM,HPSE,ITGAX,ADA2,ITGB2,PLAC8,ITK,FGL2,LAPTM5,NOD2,CD84,CCR2,S100A8,ADORA2B,S100A9,TYROBP,CFD,S100A12,CLC,PTPRC,FCER1G,PTPRE,FCGR2A,FCGR2B,FCGR3B,CLEC4A,SASH3,FCN1,VNN1,PIK3CG,MICB,BTK,AHR,C1QA,GM2A,CCL2,PYGL,C3,C3AR1,CCL5,PLAUR,BIN2,C5AR1,GPNMB,CCL20,…
GO: Biological Process	GO:0002252	immune effector process		1		3.16e-62	1.8e-58	4.49e-59	4.14e-58	130	1393	CYBB,SLAMF8,IL10,CFH,ATP8B4,HLA-DMA,CLEC5A,CD300A,VSIG4,CLEC7A,TCIRG1,PTPN22,TLR7,HMOX1,CHI3L1,PTAFR,CHIT1,ADGRE2,PTGDR,ITGAM,HPSE,ITGAX,ADA2,ITGB2,TRIM22,PLAC8,FGL2,LAPTM5,NOD2,CD84,CCR2,IFIH1,S100A8,ADORA2B,S100A9,TYROBP,CFD,S100A12,CLC,PTPRC,FCER1G,FCGR2A,FCGR2B,FCGR3B,SASH3,FCN1,VNN1,PIK3CG,MICB,BTK,CXCL9,C1QA,GM2A,C1QB,C1R,CCL2,C1S,PYGL,C3,C3AR1,CCL5,PLAUR,BIN2,C5AR1,CCL20,FGR,MMP9,MMP12,CXC…
GO: Biological Process	GO:0006954	inflammatory response		1		2.1e-59	1.2e-55	2.39e-56	2.21e-55	104	862	CYBB,SLAMF8,IL10,CFH,CD300A,ACP5,SERPINF1,CLEC7A,TCIRG1,TLR7,HMOX1,LY96,CHI3L1,PTAFR,ADGRE2,PTGDR,ITGAM,ITGB2,PTGS2,ADCY7,CD163,FABP4,NOD2,CCR2,S100A8,ADORA2B,CCN4,S100A9,S100A12,ADORA3,PTPRC,FCER1G,FCGR2B,VNN1,PIK3CG,SCG2,BTK,CXCL9,HRH1,CCL2,C3,CCR1,C3AR1,CCL4,CCL5,CCL7,CCR5,CCL8,CCL11,C5AR1,CCL18,CCL20,MMP9,CXCL6,LY86,ALOX5,IL33,ALOX5AP,LILRB4,SELE,THEMIS2,PLA2G7,NT5E,ANXA1,FOLR2,FPR1,FPR3,AOAH…
GO: Biological Process	GO:0002682	regulation of immune system process	1	1		2.86e-59	1.63e-55	2.72e-56	2.51e-55	140	1747	SLAMF8,IL10,CFH,EREG,PDE4B,HLA-DMA,INHBA,RASSF2,CD300A,HLA-DRB4,VSIG4,GATA6,CLEC7A,EVI2B,PTPN22,HMOX1,DCSTAMP,ITGA4,PTAFR,SAMSN1,ADGRE2,ITGAM,ITGB2,ADCY7,ITK,FGL2,LAPTM5,NOD2,CD84,CCR2,ADORA2B,TYROBP,CFD,CLC,PTPRC,FCER1G,PTPRE,FCGR1B,FCGR2A,TRAT1,FCGR2B,FCGR3B,CLEC4A,SASH3,FCN1,VNN1,MICB,BTK,LPXN,AHR,C1QA,C1QB,C1R,CCL2,C1S,C3,CCR1,C3AR1,CCL4,CCL5,CCL7,CCL8,GPR171,C5AR1,GPNMB,MMP2,CCL20,FGR,CLEC10…
GO: Biological Process	GO:0002274	myeloid leukocyte activation		1		3.39e-58	1.93e-54	2.76e-55	2.55e-54	95	707	CYBB,IL10,ATP8B4,CLEC5A,CD300A,VSIG4,TCIRG1,TLR7,HMOX1,CHI3L1,DCSTAMP,PTAFR,CHIT1,ADGRE2,PTGDR,ITGAM,HPSE,ITGAX,ADA2,ITGB2,PLAC8,FGL2,CD84,CCR2,S100A8,ADORA2B,S100A9,TYROBP,CFD,S100A12,PTPRC,FCER1G,PTPRE,FCGR2A,FCGR2B,FCGR3B,FCN1,VNN1,PIK3CG,BTK,C1QA,GM2A,PYGL,C3,C3AR1,CCL5,PLAUR,BIN2,C5AR1,FGR,MMP9,CXCL6,MNDA,HSPA6,ALOX5,IL33,RAC2,LILRB4,DOCK2,GLIPR1,SELL,LAT2,FPR1,LAIR1,LCP2,PPBP,CR1,OLR1,MILR1…
GO: Biological Process	GO:0002443	leukocyte mediated immunity		1		3.29e-56	1.87e-52	2.34e-53	2.16e-52	105	950	CYBB,IL10,CFH,ATP8B4,HLA-DMA,CLEC5A,CD300A,CLEC7A,TCIRG1,HMOX1,CHI3L1,PTAFR,CHIT1,ADGRE2,PTGDR,ITGAM,HPSE,ITGAX,ADA2,ITGB2,PLAC8,FGL2,NOD2,CD84,CCR2,S100A8,ADORA2B,S100A9,TYROBP,CFD,S100A12,CLC,PTPRC,FCER1G,FCGR2A,FCGR2B,FCGR3B,SASH3,FCN1,VNN1,PIK3CG,BTK,C1QA,GM2A,C1QB,C1R,CCL2,C1S,PYGL,C3,C3AR1,PLAUR,BIN2,C5AR1,CCL20,FGR,MMP9,CXCL6,MNDA,HSPA6,ALOX5,VAV1,RAC2,LILRB4,DOCK2,GLIPR1,SELL,LAT2,FPR1,LA…
GO: Biological Process	GO:0050776	regulation of immune response	1	1		2.71e-51	1.55e-47	1.72e-48	1.58e-47	105	1066	SLAMF8,IL10,CFH,EREG,PDE4B,HLA-DMA,CD300A,HLA-DRB4,VSIG4,GATA6,PTPN22,HMOX1,ITGA4,PTAFR,SAMSN1,ADGRE2,ITGAM,ITGB2,ADCY7,ITK,FGL2,LAPTM5,NOD2,CD84,CCR2,ADORA2B,TYROBP,CFD,CLC,PTPRC,FCER1G,FCGR1B,FCGR2A,TRAT1,FCGR2B,FCGR3B,CLEC4A,SASH3,FCN1,MICB,BTK,LPXN,C1QA,C1QB,C1R,C1S,C3,C3AR1,CCL5,C5AR1,MMP2,CCL20,FGR,CLEC10A,MMP12,KLRB1,MNDA,IL33,VAV1,CLEC2B,RAC2,COL1A1,COL1A2,LILRB4,THEMIS2,SELL,LAT2,PILRA,A…
GO: Biological Process	GO:0002366	leukocyte activation involved in immune response		1		3.48e-50	1.98e-46	1.98e-47	1.83e-46	90	760	CYBB,IL10,ATP8B4,CLEC5A,CD300A,CLEC7A,TCIRG1,HMOX1,CHI3L1,PTAFR,CHIT1,ADGRE2,PTGDR,ITGAM,HPSE,ITGAX,ADA2,ITGB2,PLAC8,FGL2,CD84,CCR2,S100A8,ADORA2B,S100A9,TYROBP,CFD,S100A12,PTPRC,FCER1G,FCGR2A,FCGR2B,FCGR3B,FCN1,VNN1,PIK3CG,BTK,GM2A,PYGL,C3,C3AR1,PLAUR,BIN2,C5AR1,CCL20,FGR,MMP9,MNDA,HSPA6,ALOX5,IL33,RAC2,DOCK2,GLIPR1,SELL,LAT2,ANXA1,FPR1,LAIR1,DOCK10,GPR183,LCP1,PPBP,CR1,OLR1,MILR1,SLC2A3,NLRP3,L…
GO: Biological Process	GO:0002263	cell activation involved in immune response	1	1		5.46e-50	3.11e-46	2.83e-47	2.61e-46	90	764	CYBB,IL10,ATP8B4,CLEC5A,CD300A,CLEC7A,TCIRG1,HMOX1,CHI3L1,PTAFR,CHIT1,ADGRE2,PTGDR,ITGAM,HPSE,ITGAX,ADA2,ITGB2,PLAC8,FGL2,CD84,CCR2,S100A8,ADORA2B,S100A9,TYROBP,CFD,S100A12,PTPRC,FCER1G,FCGR2A,FCGR2B,FCGR3B,FCN1,VNN1,PIK3CG,BTK,GM2A,PYGL,C3,C3AR1,PLAUR,BIN2,C5AR1,CCL20,FGR,MMP9,MNDA,HSPA6,ALOX5,IL33,RAC2,DOCK2,GLIPR1,SELL,LAT2,ANXA1,FPR1,LAIR1,DOCK10,GPR183,LCP1,PPBP,CR1,OLR1,MILR1,SLC2A3,NLRP3,L…
GO: Biological Process	GO:0050900	leukocyte migration		1		6.42e-50	3.66e-46	3.05e-47	2.81e-46	79	554	SLAMF8,IL10,PDE4B,CD300A,PTPN22,HMOX1,ITGA4,PTAFR,ADGRE2,ITGAM,ITGAX,ITGB2,NOD2,CD84,CCR2,S100A8,S100A9,S100A12,FCER1G,PIK3CG,SCG2,CXCL9,HRH1,CCL2,CCR1,C3AR1,CCL4,CCL5,CCL7,CCR5,CCL8,CCL11,C5AR1,MMP1,CCL18,CCL20,MMP9,CXCL6,ALOX5,IL33,VAV1,RAC2,COL1A1,COL1A2,SELE,SELL,PLA2G7,GPR18,ANXA1,FOLR2,CH25H,GPR183,PPBP,CXCL2,CXCL3,OLR1,LEP,NLRP3,LGALS3,THBD,CD2,JCHAIN,TLR2,IGKC,CRTAM,SERPINE1,AOC3,CD44,TRE…
GO: Biological Process	GO:0002444	myeloid leukocyte mediated immunity		1		2.23e-48	1.27e-44	9.77e-46	9.01e-45	79	580	CYBB,ATP8B4,CLEC5A,CD300A,TCIRG1,HMOX1,CHI3L1,PTAFR,CHIT1,ADGRE2,PTGDR,ITGAM,HPSE,ITGAX,ADA2,ITGB2,PLAC8,FGL2,CD84,CCR2,S100A8,ADORA2B,S100A9,TYROBP,CFD,S100A12,PTPRC,FCER1G,FCGR2A,FCGR2B,FCGR3B,FCN1,VNN1,PIK3CG,BTK,GM2A,PYGL,C3,C3AR1,PLAUR,BIN2,C5AR1,FGR,MMP9,CXCL6,MNDA,HSPA6,ALOX5,RAC2,DOCK2,GLIPR1,SELL,LAT2,FPR1,LAIR1,PPBP,CR1,OLR1,MILR1,SLC2A3,LGALS3,RNASE2,CD14,TIMP2,CD36,TLR2,CD44,TREM1,CD5…
GO: Biological Process	GO:0002684	positive regulation of immune system process	1	1		4.79e-48	2.73e-44	1.95e-45	1.8e-44	105	1152	IL10,CFH,EREG,PDE4B,HLA-DMA,CD300A,HLA-DRB4,VSIG4,CLEC7A,EVI2B,PTPN22,HMOX1,DCSTAMP,ITGA4,PTAFR,ADGRE2,ITGAM,ITGB2,ITK,LAPTM5,NOD2,CD84,CCR2,ADORA2B,TYROBP,CFD,PTPRC,FCER1G,FCGR2A,TRAT1,FCGR2B,CLEC4A,SASH3,FCN1,VNN1,MICB,BTK,LPXN,C1QA,C1QB,C1R,CCL2,C1S,C3,CCR1,C3AR1,CCL4,CCL5,CCL7,CCL8,C5AR1,MMP2,CCL20,FGR,CLEC10A,MMP9,MMP12,MNDA,IL33,VAV1,RAC2,LILRB4,SELE,THEMIS2,SELL,PLA2G7,LAT2,ANXA1,MAP3K8,FP…
GO: Biological Process	GO:0043299	leukocyte degranulation				1.05e-47	5.95e-44	3.97e-45	3.66e-44	77	555	CYBB,ATP8B4,CLEC5A,CD300A,TCIRG1,HMOX1,CHI3L1,PTAFR,CHIT1,ADGRE2,PTGDR,ITGAM,HPSE,ITGAX,ADA2,ITGB2,PLAC8,FGL2,CD84,CCR2,S100A8,ADORA2B,S100A9,TYROBP,CFD,S100A12,PTPRC,FCER1G,FCGR2A,FCGR2B,FCGR3B,FCN1,VNN1,PIK3CG,BTK,GM2A,PYGL,C3,C3AR1,PLAUR,BIN2,C5AR1,FGR,MMP9,MNDA,HSPA6,ALOX5,RAC2,DOCK2,GLIPR1,SELL,LAT2,FPR1,LAIR1,PPBP,CR1,OLR1,MILR1,SLC2A3,LGALS3,RNASE2,CD14,TIMP2,CD36,TLR2,CD44,CD53,TNFAIP6,TN…
GO: Biological Process	GO:0002275	myeloid cell activation involved in immune response		1		8.82e-47	5.02e-43	3.14e-44	2.9e-43	77	571	CYBB,ATP8B4,CLEC5A,CD300A,TCIRG1,HMOX1,CHI3L1,PTAFR,CHIT1,ADGRE2,PTGDR,ITGAM,HPSE,ITGAX,ADA2,ITGB2,PLAC8,FGL2,CD84,CCR2,S100A8,ADORA2B,S100A9,TYROBP,CFD,S100A12,PTPRC,FCER1G,FCGR2A,FCGR3B,FCN1,VNN1,PIK3CG,BTK,GM2A,PYGL,C3,C3AR1,PLAUR,BIN2,C5AR1,FGR,MMP9,MNDA,HSPA6,ALOX5,IL33,RAC2,DOCK2,GLIPR1,SELL,LAT2,FPR1,LAIR1,PPBP,CR1,OLR1,MILR1,SLC2A3,LGALS3,RNASE2,CD14,TIMP2,CD36,TLR2,CD44,TREM2,CD53,TNFAIP…
GO: Biological Process	GO:0009607	response to biotic stimulus		1		6.44e-46	3.67e-42	2.16e-43	1.99e-42	124	1741	CYBB,SLAMF8,IL10,CFH,IL10RA,CD52,EREG,PDE4B,CLEC5A,ACP5,HLA-DRB4,VSIG4,GATA6,CLEC7A,GBP2,PTPN22,NCF2,TLR7,LY96,PTAFR,CHIT1,ITGAM,ITGAX,TRIM22,PTGS2,PLAC8,FABP4,FGL2,LAPTM5,NOD2,CD84,IFIH1,S100A8,S100A9,TYROBP,CFD,S100A12,FAP,PTPRC,FCER1G,FCGR1B,FCGR2B,CLEC4A,FCN1,VNN1,PIK3CG,MICB,BTK,CXCL9,C1QA,C1QB,C1R,CCL2,C1S,PYGL,C3,CCL4,CCL5,CCL7,CCR5,CCL8,CCL11,SRPX,C5AR1,MMP2,CCL18,CCL20,FGR,CLEC10A,MMP12,…
GO: Biological Process	GO:0051707	response to other organism				1.27e-44	7.24e-41	4.02e-42	3.71e-41	121	1700	CYBB,SLAMF8,IL10,CFH,IL10RA,CD52,EREG,PDE4B,CLEC5A,ACP5,HLA-DRB4,VSIG4,GATA6,CLEC7A,GBP2,PTPN22,NCF2,TLR7,LY96,PTAFR,CHIT1,ITGAM,ITGAX,TRIM22,PTGS2,PLAC8,FABP4,FGL2,NOD2,CD84,IFIH1,S100A8,S100A9,TYROBP,CFD,S100A12,PTPRC,FCER1G,FCGR1B,FCGR2B,CLEC4A,FCN1,VNN1,PIK3CG,MICB,BTK,CXCL9,C1QA,C1QB,C1R,CCL2,C1S,PYGL,C3,CCL4,CCL5,CCL7,CCR5,CCL8,CCL11,C5AR1,MMP2,CCL18,CCL20,FGR,CLEC10A,MMP12,CXCL6,LY86,MNDA,…
GO: Biological Process	GO:0043207	response to external biotic stimulus		1		1.44e-44	8.19e-41	4.31e-42	3.98e-41	121	1702	CYBB,SLAMF8,IL10,CFH,IL10RA,CD52,EREG,PDE4B,CLEC5A,ACP5,HLA-DRB4,VSIG4,GATA6,CLEC7A,GBP2,PTPN22,NCF2,TLR7,LY96,PTAFR,CHIT1,ITGAM,ITGAX,TRIM22,PTGS2,PLAC8,FABP4,FGL2,NOD2,CD84,IFIH1,S100A8,S100A9,TYROBP,CFD,S100A12,PTPRC,FCER1G,FCGR1B,FCGR2B,CLEC4A,FCN1,VNN1,PIK3CG,MICB,BTK,CXCL9,C1QA,C1QB,C1R,CCL2,C1S,PYGL,C3,CCL4,CCL5,CCL7,CCR5,CCL8,CCL11,C5AR1,MMP2,CCL18,CCL20,FGR,CLEC10A,MMP12,CXCL6,LY86,MNDA,…
GO: Biological Process	GO:0036230	granulocyte activation				1.68e-40	9.55e-37	4.77e-38	4.4e-37	68	516	CYBB,ATP8B4,CLEC5A,CD300A,TCIRG1,CHI3L1,PTAFR,CHIT1,ITGAM,HPSE,ITGAX,ADA2,ITGB2,PLAC8,FGL2,CCR2,S100A8,S100A9,TYROBP,CFD,S100A12,PTPRC,FCER1G,FCGR2A,FCGR2B,FCGR3B,FCN1,VNN1,GM2A,PYGL,C3,C3AR1,CCL5,PLAUR,BIN2,C5AR1,FGR,MMP9,CXCL6,MNDA,HSPA6,ALOX5,DOCK2,GLIPR1,SELL,FPR1,LAIR1,PPBP,CR1,OLR1,SLC2A3,LGALS3,RNASE2,CD14,TIMP2,CD36,TLR2,CD44,CD53,TNFAIP6,TNFRSF1B,CTSD,LYZ,CTSS,CTSZ,CXCL8,CXCR2,NCKAP1L
GO: Biological Process	GO:0098542	defense response to other organism		1		2.97e-40	1.69e-36	8.05e-38	7.43e-37	101	1285	CYBB,SLAMF8,IL10,CFH,EREG,CLEC5A,ACP5,HLA-DRB4,VSIG4,CLEC7A,GBP2,PTPN22,NCF2,TLR7,LY96,PTAFR,ITGAM,ITGAX,TRIM22,PLAC8,FGL2,NOD2,CD84,IFIH1,S100A8,S100A9,TYROBP,CFD,S100A12,PTPRC,FCER1G,FCGR1B,FCGR2B,CLEC4A,FCN1,VNN1,PIK3CG,MICB,BTK,CXCL9,C1QA,C1QB,C1R,CCL2,C1S,C3,CCL4,CCL5,CCL7,CCL8,CCL11,C5AR1,MMP2,CCL18,CCL20,FGR,CLEC10A,MMP12,CXCL6,LY86,MNDA,IL33,VAV1,MRC1,ANXA1,CASP1,IRF8,BIRC3,SAMHD1,APOE,PP…
GO: Biological Process	GO:0042119	neutrophil activation		1		8.32e-40	4.74e-36	2.16e-37	1.99e-36	67	510	CYBB,ATP8B4,CLEC5A,CD300A,TCIRG1,CHI3L1,PTAFR,CHIT1,ITGAM,HPSE,ITGAX,ADA2,ITGB2,PLAC8,FGL2,S100A8,S100A9,TYROBP,CFD,S100A12,PTPRC,FCER1G,FCGR2A,FCGR2B,FCGR3B,FCN1,VNN1,GM2A,PYGL,C3,C3AR1,CCL5,PLAUR,BIN2,C5AR1,FGR,MMP9,CXCL6,MNDA,HSPA6,ALOX5,DOCK2,GLIPR1,SELL,FPR1,LAIR1,PPBP,CR1,OLR1,SLC2A3,LGALS3,RNASE2,CD14,TIMP2,CD36,TLR2,CD44,CD53,TNFAIP6,TNFRSF1B,CTSD,LYZ,CTSS,CTSZ,CXCL8,CXCR2,NCKAP1L
GO: Biological Process	GO:0030595	leukocyte chemotaxis		1		9.84e-40	5.6e-36	2.44e-37	2.25e-36	51	253	SLAMF8,IL10,PDE4B,ADGRE2,ITGAM,ITGB2,NOD2,CCR2,S100A8,S100A9,S100A12,FCER1G,PIK3CG,SCG2,CXCL9,HRH1,CCL2,CCR1,C3AR1,CCL4,CCL5,CCL7,CCR5,CCL8,CCL11,C5AR1,CCL18,CCL20,CXCL6,ALOX5,VAV1,RAC2,SELL,PLA2G7,GPR18,ANXA1,FOLR2,CH25H,GPR183,PPBP,CXCL2,CXCL3,LGALS3,SERPINE1,TREM1,GREM1,LYN,IL6,CXCL8,CXCR2,NCKAP1L
GO: Biological Process	GO:0032101	regulation of response to external stimulus		1		9.69e-39	5.52e-35	2.26e-36	2.08e-35	94	1147	SLAMF8,IL10,EREG,ACP5,SERPINF1,VSIG4,GATA6,PTPN22,TLR7,LY96,HPSE,PTGS2,FABP4,FGL2,NOD2,CD84,CCR2,S100A8,ADORA2B,CCN4,S100A9,TYROBP,S100A12,FAP,PTPRC,FCER1G,FCGR2B,CLEC4A,FCN1,PIK3CG,SCG2,MICB,BTK,CCL2,C3,CCR1,C3AR1,CCL4,CCL5,PLAUR,CCL7,C5AR1,MMP2,FGR,CLEC10A,MMP9,MMP12,CXCL6,LY86,MNDA,ALOX5,IL33,ALOX5AP,VAV1,RAC2,SELE,SELL,PLA2G7,GPR18,NT5E,ANXA1,AOAH,CASP1,BIRC3,SAMHD1,GPR183,APOE,CR1,LEP,NLRP3,…
GO: Biological Process	GO:0016477	cell migration				9.92e-39	5.65e-35	2.26e-36	2.08e-35	117	1812	SLAMF8,IL10,PDE4B,MYO5A,CD300A,SERPINF1,CLEC7A,PTPN22,HMOX1,ITGA4,PTAFR,ADGRE2,ITGAM,ITGAX,ITGB2,PTGS2,ZEB2,TWIST1,NRP2,MEOX2,NOD2,CD84,CCR2,S100A8,ADORA2B,CCN4,S100A9,S100A12,ADORA3,FAP,SRPX2,PTPRC,FCER1G,PIK3CG,SCG2,CXCL9,LPXN,HRH1,CCL2,FGF7,CCR1,C3AR1,CCL4,CCL5,CCL7,CCR5,BIN2,CCL8,CCL11,C5AR1,MMP1,GPNMB,MMP2,CCL18,CCL20,FGR,MMP9,MMP12,CXCL6,ALOX5,IL33,VAV1,RAC2,COL1A1,COL1A2,SELE,SELL,PLA2G7,C…
GO: Biological Process	GO:0002446	neutrophil mediated immunity		1		1.12e-38	6.37e-35	2.45e-36	2.26e-35	66	512	CYBB,ATP8B4,CLEC5A,CD300A,TCIRG1,CHI3L1,PTAFR,CHIT1,ITGAM,HPSE,ITGAX,ADA2,ITGB2,PLAC8,FGL2,S100A8,S100A9,TYROBP,CFD,S100A12,PTPRC,FCER1G,FCGR2A,FCGR3B,FCN1,VNN1,GM2A,PYGL,C3,C3AR1,PLAUR,BIN2,C5AR1,FGR,MMP9,CXCL6,MNDA,HSPA6,ALOX5,DOCK2,GLIPR1,SELL,FPR1,LAIR1,PPBP,CR1,OLR1,SLC2A3,LGALS3,RNASE2,CD14,TIMP2,CD36,TLR2,CD44,TREM1,CD53,TNFAIP6,TNFRSF1B,CTSD,LYZ,CTSS,IL6,CTSZ,CXCR2,NCKAP1L
GO: Biological Process	GO:0001816	cytokine production		1		3.26e-38	1.86e-34	6.88e-36	6.34e-35	87	984	CYBB,IL10,EREG,PDE4B,INHBA,CLEC5A,ACP5,VSIG4,GATA6,CLEC7A,TCIRG1,PTPN22,TLR7,HMOX1,LY96,CHI3L1,PTAFR,HPSE,PTGS2,ADCY7,ITK,FABP4,TWIST1,LAPTM5,NOD2,CD84,CCR2,IFIH1,S100A8,ADORA2B,CCN4,S100A9,TYROBP,S100A12,CLC,PTPRC,FCER1G,FCGR2B,CLEC4A,SASH3,FCN1,PIK3CG,BTK,CCL2,C3,C3AR1,CCL5,C5AR1,GPNMB,CCL20,FGR,MMP12,CXCL6,MNDA,ALOX5,IL33,LILRB4,GPR18,ANXA1,CASP1,IRF8,BIRC3,LCP2,CR1,LEP,NLRP3,POSTN,CD2,LIPA,IG…
GO: Biological Process	GO:0045055	regulated exocytosis				5.28e-38	3.01e-34	1.07e-35	9.91e-35	81	845	CYBB,ATP8B4,CLEC5A,CD300A,TCIRG1,HMOX1,CHI3L1,PTAFR,CHIT1,ADGRE2,PTGDR,ITGAM,HPSE,ITGAX,ADA2,ITGB2,PLAC8,FGL2,CD84,CCR2,S100A8,ADORA2B,S100A9,TYROBP,CFD,S100A12,PTPRC,FCER1G,FCGR2A,FCGR2B,FCGR3B,FCN1,VNN1,PIK3CG,BTK,GM2A,PYGL,C3,C3AR1,PLAUR,BIN2,C5AR1,FGR,PLEK,MMP9,MNDA,HSPA6,ALOX5,RAC2,DOCK2,GLIPR1,SELL,LAT2,FPR1,LAIR1,PPBP,CR1,OLR1,MILR1,SLC2A3,LGALS3,MMRN1,RNASE2,IGF1,CD14,TIMP2,CD36,TLR2,SERP…
GO: Biological Process	GO:0006887	exocytosis				7.68e-38	4.37e-34	1.41e-35	1.3e-34	86	970	CYBB,ATP8B4,MYO5A,CLEC5A,CD300A,TCIRG1,HMOX1,CHI3L1,PTAFR,CHIT1,ADGRE2,PTGDR,ITGAM,HPSE,ITGAX,ADA2,ITGB2,PLAC8,FGL2,CD84,CCR2,S100A8,ADORA2B,S100A9,TYROBP,CFD,S100A12,PTPRC,FCER1G,FCGR2A,FCGR2B,FCGR3B,FCN1,VNN1,PIK3CG,BTK,GM2A,PYGL,C3,CCR1,C3AR1,CCL5,PLAUR,BIN2,CCL8,C5AR1,FGR,PLEK,MMP9,MNDA,HSPA6,ALOX5,RAC2,DOCK2,GLIPR1,SELL,LAT2,ANXA1,FPR1,LAIR1,PPBP,CR1,OLR1,MILR1,SLC2A3,LGALS3,MMRN1,RNASE2,IGF…
GO: Biological Process	GO:0140029	exocytic process				7.68e-38	4.37e-34	1.41e-35	1.3e-34	86	970	CYBB,ATP8B4,MYO5A,CLEC5A,CD300A,TCIRG1,HMOX1,CHI3L1,PTAFR,CHIT1,ADGRE2,PTGDR,ITGAM,HPSE,ITGAX,ADA2,ITGB2,PLAC8,FGL2,CD84,CCR2,S100A8,ADORA2B,S100A9,TYROBP,CFD,S100A12,PTPRC,FCER1G,FCGR2A,FCGR2B,FCGR3B,FCN1,VNN1,PIK3CG,BTK,GM2A,PYGL,C3,CCR1,C3AR1,CCL5,PLAUR,BIN2,CCL8,C5AR1,FGR,PLEK,MMP9,MNDA,HSPA6,ALOX5,RAC2,DOCK2,GLIPR1,SELL,LAT2,ANXA1,FPR1,LAIR1,PPBP,CR1,OLR1,MILR1,SLC2A3,LGALS3,MMRN1,RNASE2,IGF…
GO: Biological Process	GO:0099500	vesicle fusion to plasma membrane				7.68e-38	4.37e-34	1.41e-35	1.3e-34	86	970	CYBB,ATP8B4,MYO5A,CLEC5A,CD300A,TCIRG1,HMOX1,CHI3L1,PTAFR,CHIT1,ADGRE2,PTGDR,ITGAM,HPSE,ITGAX,ADA2,ITGB2,PLAC8,FGL2,CD84,CCR2,S100A8,ADORA2B,S100A9,TYROBP,CFD,S100A12,PTPRC,FCER1G,FCGR2A,FCGR2B,FCGR3B,FCN1,VNN1,PIK3CG,BTK,GM2A,PYGL,C3,CCR1,C3AR1,CCL5,PLAUR,BIN2,CCL8,C5AR1,FGR,PLEK,MMP9,MNDA,HSPA6,ALOX5,RAC2,DOCK2,GLIPR1,SELL,LAT2,ANXA1,FPR1,LAIR1,PPBP,CR1,OLR1,MILR1,SLC2A3,LGALS3,MMRN1,RNASE2,IGF…
GO: Biological Process	GO:0060326	cell chemotaxis				1.07e-37	6.12e-34	1.91e-35	1.76e-34	55	337	SLAMF8,IL10,PDE4B,ADGRE2,ITGAM,ITGB2,NOD2,CCR2,S100A8,S100A9,S100A12,FCER1G,PIK3CG,SCG2,CXCL9,HRH1,CCL2,CCR1,C3AR1,CCL4,CCL5,CCL7,CCR5,BIN2,CCL8,CCL11,C5AR1,CCL18,CCL20,CXCL6,ALOX5,VAV1,RAC2,SELL,PLA2G7,GPR18,ANXA1,FOLR2,CH25H,CCRL2,GPR183,PPBP,CXCL2,CXCL3,LGALS3,EGR3,LOX,SERPINE1,TREM1,GREM1,LYN,IL6,CXCL8,CXCR2,NCKAP1L
GO: Biological Process	GO:0061025	membrane fusion				1.8e-37	1.03e-33	3.11e-35	2.87e-34	92	1135	CYBB,ATP8B4,MYO5A,CLEC5A,CD300A,TCIRG1,HMOX1,CHI3L1,DCSTAMP,PTAFR,CHIT1,ADGRE2,PTGDR,ITGAM,HPSE,ITGAX,ADA2,ITGB2,PLAC8,FGL2,CD84,CCR2,S100A8,ADORA2B,S100A9,TYROBP,CFD,S100A12,PTPRC,FCER1G,FCGR2A,FCGR2B,FCGR3B,FCN1,VNN1,PIK3CG,BTK,CXCL9,GM2A,PYGL,C3,CCR1,C3AR1,CCL5,PLAUR,CCR5,BIN2,CCL8,C5AR1,FGR,PLEK,MMP9,MNDA,HSPA6,ALOX5,RAC2,DOCK2,GLIPR1,SELL,LAT2,ANXA1,FOLR2,FPR1,LAIR1,PPBP,CR1,ADAM12,OLR1,MILR…
GO: Biological Process	GO:0043312	neutrophil degranulation				9.06e-37	5.16e-33	1.52e-34	1.4e-33	63	491	CYBB,ATP8B4,CLEC5A,CD300A,TCIRG1,CHI3L1,PTAFR,CHIT1,ITGAM,HPSE,ITGAX,ADA2,ITGB2,PLAC8,FGL2,S100A8,S100A9,TYROBP,CFD,S100A12,PTPRC,FCER1G,FCGR2A,FCGR3B,FCN1,VNN1,GM2A,PYGL,C3,C3AR1,PLAUR,BIN2,C5AR1,FGR,MMP9,MNDA,HSPA6,ALOX5,DOCK2,GLIPR1,SELL,FPR1,LAIR1,PPBP,CR1,OLR1,SLC2A3,LGALS3,RNASE2,CD14,TIMP2,CD36,TLR2,CD44,CD53,TNFAIP6,TNFRSF1B,CTSD,LYZ,CTSS,CTSZ,CXCR2,NCKAP1L
GO: Biological Process	GO:0002283	neutrophil activation involved in immune response				1.67e-36	9.51e-33	2.72e-34	2.51e-33	63	496	CYBB,ATP8B4,CLEC5A,CD300A,TCIRG1,CHI3L1,PTAFR,CHIT1,ITGAM,HPSE,ITGAX,ADA2,ITGB2,PLAC8,FGL2,S100A8,S100A9,TYROBP,CFD,S100A12,PTPRC,FCER1G,FCGR2A,FCGR3B,FCN1,VNN1,GM2A,PYGL,C3,C3AR1,PLAUR,BIN2,C5AR1,FGR,MMP9,MNDA,HSPA6,ALOX5,DOCK2,GLIPR1,SELL,FPR1,LAIR1,PPBP,CR1,OLR1,SLC2A3,LGALS3,RNASE2,CD14,TIMP2,CD36,TLR2,CD44,CD53,TNFAIP6,TNFRSF1B,CTSD,LYZ,CTSS,CTSZ,CXCR2,NCKAP1L
GO: Biological Process	GO:0016050	vesicle organization				3.07e-36	1.75e-32	4.85e-34	4.47e-33	114	1825	CYBB,IL10RA,ATP8B4,MYO5A,CLEC5A,CD300A,CLEC7A,TCIRG1,HMOX1,CHI3L1,ITGA4,PTAFR,CHIT1,ADGRE2,PTGDR,ITGAM,HPSE,ITGAX,ADA2,ITGB2,ZEB2,CD163,PLAC8,FGL2,CD84,CCR2,S100A8,ADORA2B,S100A9,TYROBP,CFD,S100A12,PTPRC,FCER1G,FCGR1B,FCGR2A,TRAT1,FCGR2B,FCGR3B,FCN1,VNN1,PIK3CG,BTK,GM2A,PYGL,C3,CCR1,C3AR1,CCL5,PLAUR,BIN2,CCL8,SRPX,C5AR1,FGR,PLEK,CLEC10A,MMP9,MNDA,HSPA6,ALOX5,RAC2,LILRB4,SELE,DOCK2,GLIPR1,SELL,MRC…
GO: Biological Process	GO:0006906	vesicle fusion				5.22e-36	2.97e-32	8.03e-34	7.41e-33	86	1025	CYBB,ATP8B4,MYO5A,CLEC5A,CD300A,TCIRG1,HMOX1,CHI3L1,PTAFR,CHIT1,ADGRE2,PTGDR,ITGAM,HPSE,ITGAX,ADA2,ITGB2,PLAC8,FGL2,CD84,CCR2,S100A8,ADORA2B,S100A9,TYROBP,CFD,S100A12,PTPRC,FCER1G,FCGR2A,FCGR2B,FCGR3B,FCN1,VNN1,PIK3CG,BTK,GM2A,PYGL,C3,CCR1,C3AR1,CCL5,PLAUR,BIN2,CCL8,C5AR1,FGR,PLEK,MMP9,MNDA,HSPA6,ALOX5,RAC2,DOCK2,GLIPR1,SELL,LAT2,ANXA1,FPR1,LAIR1,PPBP,CR1,OLR1,MILR1,SLC2A3,LGALS3,MMRN1,RNASE2,IGF…
GO: Biological Process	GO:0090174	organelle membrane fusion				8.13e-36	4.63e-32	1.22e-33	1.12e-32	86	1031	CYBB,ATP8B4,MYO5A,CLEC5A,CD300A,TCIRG1,HMOX1,CHI3L1,PTAFR,CHIT1,ADGRE2,PTGDR,ITGAM,HPSE,ITGAX,ADA2,ITGB2,PLAC8,FGL2,CD84,CCR2,S100A8,ADORA2B,S100A9,TYROBP,CFD,S100A12,PTPRC,FCER1G,FCGR2A,FCGR2B,FCGR3B,FCN1,VNN1,PIK3CG,BTK,GM2A,PYGL,C3,CCR1,C3AR1,CCL5,PLAUR,BIN2,CCL8,C5AR1,FGR,PLEK,MMP9,MNDA,HSPA6,ALOX5,RAC2,DOCK2,GLIPR1,SELL,LAT2,ANXA1,FPR1,LAIR1,PPBP,CR1,OLR1,MILR1,SLC2A3,LGALS3,MMRN1,RNASE2,IGF…
GO: Biological Process	GO:0097529	myeloid leukocyte migration				2.48e-35	1.41e-31	3.62e-33	3.34e-32	47	248	SLAMF8,PDE4B,CD300A,ADGRE2,ITGAM,ITGB2,NOD2,CCR2,S100A8,S100A9,S100A12,FCER1G,PIK3CG,SCG2,CXCL9,HRH1,CCL2,CCR1,C3AR1,CCL4,CCL5,CCL7,CCL8,CCL11,C5AR1,CCL18,CCL20,CXCL6,VAV1,RAC2,SELL,PLA2G7,ANXA1,FOLR2,PPBP,CXCL2,CXCL3,LGALS3,SERPINE1,TREM2,TREM1,GREM1,LYN,IL6,CXCL8,CXCR2,NCKAP1L
GO: Biological Process	GO:0048284	organelle fusion				9.44e-35	5.38e-31	1.34e-32	1.24e-31	86	1065	CYBB,ATP8B4,MYO5A,CLEC5A,CD300A,TCIRG1,HMOX1,CHI3L1,PTAFR,CHIT1,ADGRE2,PTGDR,ITGAM,HPSE,ITGAX,ADA2,ITGB2,PLAC8,FGL2,CD84,CCR2,S100A8,ADORA2B,S100A9,TYROBP,CFD,S100A12,PTPRC,FCER1G,FCGR2A,FCGR2B,FCGR3B,FCN1,VNN1,PIK3CG,BTK,GM2A,PYGL,C3,CCR1,C3AR1,CCL5,PLAUR,BIN2,CCL8,C5AR1,FGR,PLEK,MMP9,MNDA,HSPA6,ALOX5,RAC2,DOCK2,GLIPR1,SELL,LAT2,ANXA1,FPR1,LAIR1,PPBP,CR1,OLR1,MILR1,SLC2A3,LGALS3,MMRN1,RNASE2,IGF…
GO: Biological Process	GO:0002697	regulation of immune effector process				5.85e-34	3.33e-30	8.12e-32	7.49e-31	62	527	SLAMF8,IL10,CFH,CD300A,VSIG4,CLEC7A,PTPN22,HMOX1,PTAFR,ADGRE2,ITGAM,ITGB2,FGL2,LAPTM5,NOD2,CD84,CCR2,ADORA2B,TYROBP,CLC,PTPRC,FCER1G,FCGR2B,SASH3,MICB,BTK,C1QA,C1QB,C1R,CCL2,C1S,C3,C3AR1,CCL5,C5AR1,CCL20,FGR,MMP12,CXCL6,IL33,VAV1,RAC2,LILRB4,ANXA1,CR1,LEP,NLRP3,LGALS3,CD28,CD86,CD36,TLR2,IGKC,TLR4,CRTAM,IRAK3,IGLC1,DUSP10,TNFRSF1B,LYN,IL6,IL7R
GO: Biological Process	GO:0050865	regulation of cell activation				1.62e-33	9.21e-30	2.19e-31	2.02e-30	71	731	SLAMF8,IL10,HLA-DMA,INHBA,CD300A,VSIG4,CLEC7A,PTPN22,HMOX1,PTAFR,SAMSN1,ADGRE2,ITGAM,ITGB2,FGL2,LAPTM5,NOD2,CD84,CCR2,ADORA2B,TYROBP,CLC,PTPRC,FCER1G,PTPRE,FCGR2B,SASH3,VNN1,BTK,AHR,CCL2,CCL5,GPNMB,CCL20,FGR,PLEK,MNDA,IL33,VAV1,RAC2,LILRB4,LST1,ANXA1,MAP3K8,GPR183,APOE,CR1,LEP,MILR1,NLRP3,LGALS3,THBD,CD2,IGF1,EGR3,CD28,CD86,IGKC,TLR4,CRTAM,CD44,TREM2,IGLC1,DUSP10,TNFRSF1B,SLAMF7,TRBC1,LYN,IL6,IL7…
GO: Biological Process	GO:0034097	response to cytokine				4.78e-33	2.73e-29	6.34e-31	5.85e-30	92	1290	IL10,CFH,IL10RA,EREG,ACP5,HLA-DRB4,TCIRG1,GBP2,HMOX1,CHI3L1,DCSTAMP,ITGA4,PTAFR,ITGAM,ITGAX,ITGB2,TRIM22,PTGS2,FABP4,TWIST1,NRP2,LAPTM5,NOD2,CCR2,IFIH1,PTPRC,FCER1G,FCGR1B,BTK,CXCL9,CCL2,CCR1,CCL4,CCL5,CCL7,CCR5,CCL8,CCL11,MMP1,GFPT2,MMP2,CCL18,CCL20,MMP9,MMP12,CXCL6,MNDA,ALOX5,IL33,VAV1,COL1A1,COL1A2,LILRB4,SELE,MRC1,ANXA1,MAP3K8,FPR1,CASP1,IRF8,BIRC3,CCRL2,SAMHD1,LCP1,PPBP,CXCL2,CXCL3,LEP,POSTN…
GO: Biological Process	GO:0045087	innate immune response				5.93e-33	3.37e-29	7.67e-31	7.07e-30	83	1045	CYBB,SLAMF8,CFH,EREG,CLEC5A,HLA-DRB4,VSIG4,CLEC7A,GBP2,PTPN22,NCF2,TLR7,LY96,PTAFR,ITGAM,TRIM22,NOD2,CD84,IFIH1,S100A8,S100A9,TYROBP,CFD,S100A12,FCER1G,FCGR1B,FCGR2B,CLEC4A,FCN1,VNN1,PIK3CG,BTK,C1QA,C1QB,C1R,CCL2,C1S,C3,CCL4,CCL5,CCL7,CCL8,CCL11,MMP2,CCL18,CCL20,FGR,CLEC10A,MMP12,LY86,MNDA,VAV1,MRC1,ANXA1,CASP1,IRF8,BIRC3,SAMHD1,APOE,CR1,LEP,NLRP3,LGALS3,RNASE2,RNASE6,CD14,JCHAIN,TLR1,TLR2,GZMB,I…
GO: Biological Process	GO:0002694	regulation of leukocyte activation				7.52e-33	4.28e-29	9.52e-31	8.78e-30	68	680	SLAMF8,IL10,HLA-DMA,INHBA,CD300A,VSIG4,CLEC7A,PTPN22,HMOX1,PTAFR,SAMSN1,ADGRE2,ITGAM,ITGB2,FGL2,LAPTM5,NOD2,CD84,CCR2,ADORA2B,TYROBP,CLC,PTPRC,FCER1G,PTPRE,FCGR2B,SASH3,VNN1,BTK,AHR,CCL2,CCL5,GPNMB,CCL20,FGR,MNDA,IL33,VAV1,RAC2,LILRB4,LST1,ANXA1,MAP3K8,GPR183,CR1,LEP,MILR1,NLRP3,LGALS3,CD2,IGF1,EGR3,CD28,CD86,IGKC,TLR4,CRTAM,CD44,TREM2,IGLC1,DUSP10,TNFRSF1B,SLAMF7,TRBC1,LYN,IL6,IL7R,NCKAP1L
GO: Biological Process	GO:0032940	secretion by cell				1.5e-32	8.53e-29	1.86e-30	1.71e-29	99	1517	CYBB,ATP8B4,MYO5A,INHBA,CLEC5A,CD300A,TCIRG1,HMOX1,CHI3L1,PTAFR,CHIT1,ADGRE2,PTGDR,ITGAM,HPSE,ITGAX,ADA2,ITGB2,PLAC8,FGL2,CD84,CCR2,S100A8,ADORA2B,S100A9,TYROBP,CFD,S100A12,PTPRC,FCER1G,FCGR2A,FCGR2B,FCGR3B,FCN1,VNN1,PIK3CG,SCG2,BTK,GM2A,FGF7,PYGL,C3,CCR1,C3AR1,CCL5,PLAUR,BIN2,CCL8,C5AR1,FGR,PLEK,MMP9,MNDA,HSPA6,ALOX5,RAC2,DOCK2,GLIPR1,SELL,COMP,LAT2,ANXA1,FPR1,LAIR1,APOE,PPBP,CR1,SLC1A3,OLR1,LEP…
GO: Biological Process	GO:0071621	granulocyte chemotaxis				5.06e-32	2.88e-28	6.04e-30	5.57e-29	36	142	PDE4B,ADGRE2,ITGAM,ITGB2,NOD2,S100A8,S100A9,S100A12,FCER1G,PIK3CG,SCG2,CXCL9,HRH1,CCL2,C3AR1,CCL4,CCL5,CCL7,CCL8,CCL11,C5AR1,CCL18,CCL20,CXCL6,VAV1,RAC2,SELL,ANXA1,PPBP,CXCL2,CXCL3,LGALS3,TREM1,CXCL8,CXCR2,NCKAP1L
GO: Biological Process	GO:0007155	cell adhesion				5.19e-32	2.96e-28	6.04e-30	5.57e-29	100	1571	IL10,CFH,HLA-DMA,CD300A,VSIG4,PTPN22,ITGA4,PTAFR,ADGRE2,ITGAM,HPSE,ITGAX,ITGB2,FGL2,NRP2,LAPTM5,NOD2,CD84,CCR2,S100A8,CCN4,S100A9,FAP,SRPX2,PTPRC,ADAMDEC1,FCGR2B,CLEC4A,SASH3,VNN1,PIK3CG,LPXN,CCL2,COL14A1,CCR1,CCL4,CCL5,PLAUR,CCL11,SRPX,GPNMB,MMP2,PLEK,MMP12,ALOX5,VAV1,RAC2,COL1A1,LILRB4,SELE,THEMIS2,SELL,COL5A1,COL8A1,COL8A2,COL15A1,COL16A1,COMP,NT5E,ANXA1,FOLR2,MAP3K8,OMD,CR1,ADAM12,OLR1,LEP,MI…
GO: Biological Process	GO:0140352	export from cell				5.19e-32	2.96e-28	6.04e-30	5.57e-29	100	1571	CYBB,ATP8B4,MYO5A,INHBA,CLEC5A,CD300A,TCIRG1,HMOX1,CHI3L1,PTAFR,CHIT1,ADGRE2,PTGDR,ITGAM,HPSE,ITGAX,ADA2,ITGB2,PLAC8,FGL2,CD84,CCR2,S100A8,ADORA2B,S100A9,TYROBP,CFD,S100A12,KCNE4,PTPRC,FCER1G,FCGR2A,FCGR2B,FCGR3B,FCN1,VNN1,PIK3CG,SCG2,BTK,GM2A,FGF7,PYGL,C3,CCR1,C3AR1,CCL5,PLAUR,BIN2,CCL8,C5AR1,FGR,PLEK,MMP9,MNDA,HSPA6,ALOX5,RAC2,DOCK2,GLIPR1,SELL,COMP,LAT2,ANXA1,FPR1,LAIR1,APOE,PPBP,CR1,SLC1A3,OL…
GO: Biological Process	GO:0001817	regulation of cytokine production				6.4e-32	3.64e-28	7.28e-30	6.72e-29	76	897	CYBB,IL10,EREG,PDE4B,INHBA,CLEC5A,ACP5,VSIG4,GATA6,CLEC7A,PTPN22,TLR7,HMOX1,LY96,PTAFR,HPSE,PTGS2,ADCY7,TWIST1,LAPTM5,NOD2,CD84,CCR2,IFIH1,ADORA2B,CCN4,TYROBP,CLC,PTPRC,FCER1G,FCGR2B,CLEC4A,SASH3,FCN1,BTK,CCL2,C3,C3AR1,CCL5,C5AR1,GPNMB,CCL20,FGR,MMP12,CXCL6,MNDA,ALOX5,IL33,LILRB4,GPR18,ANXA1,CASP1,IRF8,BIRC3,CR1,LEP,NLRP3,POSTN,CD2,IGF1,CD14,CD28,CD86,CD36,TLR1,TLR2,TLR4,CRTAM,SERPINE1,TREM2,IRAK…
GO: Biological Process	GO:0022610	biological adhesion				7.5e-32	4.27e-28	8.38e-30	7.73e-29	100	1578	IL10,CFH,HLA-DMA,CD300A,VSIG4,PTPN22,ITGA4,PTAFR,ADGRE2,ITGAM,HPSE,ITGAX,ITGB2,FGL2,NRP2,LAPTM5,NOD2,CD84,CCR2,S100A8,CCN4,S100A9,FAP,SRPX2,PTPRC,ADAMDEC1,FCGR2B,CLEC4A,SASH3,VNN1,PIK3CG,LPXN,CCL2,COL14A1,CCR1,CCL4,CCL5,PLAUR,CCL11,SRPX,GPNMB,MMP2,PLEK,MMP12,ALOX5,VAV1,RAC2,COL1A1,LILRB4,SELE,THEMIS2,SELL,COL5A1,COL8A1,COL8A2,COL15A1,COL16A1,COMP,NT5E,ANXA1,FOLR2,MAP3K8,OMD,CR1,ADAM12,OLR1,LEP,MI…
GO: Biological Process	GO:0009617	response to bacterium				1.25e-31	7.09e-28	1.36e-29	1.26e-28	73	831	SLAMF8,IL10,CFH,IL10RA,CD52,PDE4B,ACP5,GBP2,PTPN22,NCF2,LY96,PTAFR,CHIT1,PTGS2,PLAC8,FABP4,NOD2,CD84,S100A8,S100A9,CFD,S100A12,FCER1G,FCGR2B,CXCL9,CCL2,PYGL,C3,CCL5,CCR5,C5AR1,CCL20,FGR,CXCL6,LY86,TMEM255A,SELE,MRC1,TENT5A,CASP1,IRF8,PPBP,CXCL2,CXCL3,RGS1,NLRP3,THBD,RNASE2,RNASE6,CSF2RB,CD14,CD86,CD36,JCHAIN,TLR1,GZMA,TLR2,IGKC,TLR4,SERPINE1,TREM2,TREM1,IRAK3,IGLC1,DUSP10,TNFRSF1B,TRBC1,LYN,LYZ,H…
GO: Biological Process	GO:0097530	granulocyte migration				2.55e-31	1.45e-27	2.74e-29	2.53e-28	38	172	SLAMF8,PDE4B,CD300A,ADGRE2,ITGAM,ITGB2,NOD2,S100A8,S100A9,S100A12,FCER1G,PIK3CG,SCG2,CXCL9,HRH1,CCL2,C3AR1,CCL4,CCL5,CCL7,CCL8,CCL11,C5AR1,CCL18,CCL20,CXCL6,VAV1,RAC2,SELL,ANXA1,PPBP,CXCL2,CXCL3,LGALS3,TREM1,CXCL8,CXCR2,NCKAP1L
GO: Biological Process	GO:0031347	regulation of defense response				2.94e-31	1.67e-27	3.1e-29	2.86e-28	70	769	SLAMF8,IL10,EREG,ACP5,SERPINF1,VSIG4,PTPN22,TLR7,PTGS2,FABP4,FGL2,NOD2,CCR2,S100A8,ADORA2B,CCN4,S100A9,TYROBP,S100A12,PTPRC,FCER1G,FCGR2B,CLEC4A,FCN1,PIK3CG,MICB,BTK,C3,CCL5,MMP2,FGR,CLEC10A,MMP9,MMP12,CXCL6,MNDA,ALOX5,IL33,ALOX5AP,VAV1,SELE,PLA2G7,NT5E,ANXA1,AOAH,CASP1,BIRC3,SAMHD1,APOE,CR1,LEP,NLRP3,IGF1,CD28,TLR2,TLR4,CRTAM,SERPINE1,AOC3,CD44,TREM2,IRAK3,DUSP10,TNFAIP6,OSMR,TNFRSF1B,LYN,HCK,CT…
GO: Biological Process	GO:0046903	secretion				3.66e-31	2.08e-27	3.79e-29	3.49e-28	102	1672	CYBB,ATP8B4,MYO5A,INHBA,CES1,CLEC5A,CD300A,TCIRG1,HMOX1,CHI3L1,PTAFR,CHIT1,ADGRE2,PTGDR,ITGAM,HPSE,ITGAX,ADA2,ITGB2,PLAC8,FGL2,CD84,CCR2,S100A8,ADORA2B,S100A9,TYROBP,CFD,S100A12,PTPRC,FCER1G,FCGR2A,FCGR2B,FCGR3B,FCN1,VNN1,PIK3CG,SCG2,BTK,KCNMA1,GM2A,FGF7,PYGL,C3,CCR1,C3AR1,CCL5,PLAUR,BIN2,CCL8,C5AR1,FGR,PLEK,MMP9,MNDA,HSPA6,ALOX5,RAC2,DOCK2,GLIPR1,SELL,COMP,LAT2,ANXA1,FPR1,LAIR1,APOE,PPBP,CR1,SLC…
GO: Biological Process	GO:0046649	lymphocyte activation				1.65e-30	9.4e-27	1.68e-28	1.55e-27	73	865	SLAMF8,IL10,HLA-DMA,INHBA,CD300A,VSIG4,CLEC7A,TCIRG1,PTPN22,ITGA4,SAMSN1,ITGAM,ITGAX,ITGB2,ITK,FGL2,LAPTM5,NOD2,CCR2,TYROBP,CLC,PTPRC,FCER1G,FCGR2B,CLEC4A,SASH3,VNN1,PIK3CG,MICB,BTK,AHR,CCL2,CCL5,GPNMB,CCL20,FGR,MNDA,VAV1,RAC2,LILRB4,DOCK2,LST1,GPR18,LAT2,ANXA1,MAP3K8,DOCK10,GPR183,LCP1,CR1,LEP,NLRP3,LGALS3,CD2,CD3G,IGF1,EGR3,CD28,CD86,IGKC,TLR4,CRTAM,CD44,CD48,IGLC1,DUSP10,TNFRSF1B,SLAMF7,TRBC1,…
GO: Biological Process	GO:0071345	cellular response to cytokine stimulus				2.87e-30	1.63e-26	2.87e-28	2.64e-27	85	1196	IL10,IL10RA,EREG,HLA-DRB4,TCIRG1,GBP2,HMOX1,CHI3L1,DCSTAMP,ITGA4,PTAFR,ITGAM,ITGAX,ITGB2,TRIM22,PTGS2,FABP4,TWIST1,NRP2,LAPTM5,NOD2,CCR2,PTPRC,FCER1G,FCGR1B,BTK,CXCL9,CCL2,CCR1,CCL4,CCL5,CCL7,CCR5,CCL8,CCL11,MMP1,GFPT2,MMP2,CCL18,CCL20,MMP9,MMP12,CXCL6,MNDA,ALOX5,IL33,VAV1,COL1A1,COL1A2,LILRB4,MRC1,ANXA1,MAP3K8,FPR1,CASP1,IRF8,BIRC3,CCRL2,SAMHD1,LCP1,PPBP,CXCL2,CXCL3,LEP,POSTN,CSF2RA,CSF2RB,CD86,…
GO: Biological Process	GO:0006935	chemotaxis				5.66e-30	3.22e-26	5.56e-28	5.12e-27	66	710	SLAMF8,IL10,PDE4B,PTAFR,ADGRE2,ITGAM,ITGB2,NRP2,NOD2,CCR2,S100A8,S100A9,S100A12,FCER1G,PIK3CG,SCG2,CXCL9,HRH1,CCL2,FGF7,CCR1,C3AR1,CCL4,CCL5,PLAUR,CCL7,CCR5,BIN2,CCL8,CCL11,C5AR1,GPNMB,CCL18,CCL20,CXCL6,ALOX5,VAV1,RAC2,DOCK2,SELL,PLA2G7,GPR18,ANXA1,FOLR2,FPR1,FPR3,CH25H,CCRL2,GPR183,PPBP,CXCL2,CXCL3,LGALS3,RNASE2,EGR3,PLXNC1,LOX,SERPINE1,TREM2,TREM1,GREM1,LYN,IL6,CXCL8,CXCR2,NCKAP1L
GO: Biological Process	GO:0050778	positive regulation of immune response				6.87e-30	3.91e-26	6.63e-28	6.12e-27	70	809	IL10,CFH,EREG,PDE4B,HLA-DMA,CD300A,HLA-DRB4,VSIG4,PTPN22,PTAFR,ITGAM,ITGB2,ITK,LAPTM5,NOD2,CCR2,ADORA2B,TYROBP,CFD,PTPRC,FCER1G,FCGR2A,TRAT1,FCGR2B,CLEC4A,SASH3,FCN1,MICB,BTK,LPXN,C1QA,C1QB,C1R,C1S,C3,C3AR1,CCL5,C5AR1,MMP2,FGR,CLEC10A,MMP12,MNDA,IL33,VAV1,LILRB4,THEMIS2,LAT2,ANXA1,FPR1,FPR3,LCP2,CR1,NLRP3,LGALS3,CD3G,CD28,CD86,TLR2,IGKC,TLR4,CRTAM,CD44,IGLC1,TRBC1,LYN,FYB1,HCK,IL6,NCKAP1L
GO: Biological Process	GO:0030593	neutrophil chemotaxis		1		7.47e-30	4.25e-26	7.09e-28	6.54e-27	32	116	PDE4B,ITGAM,ITGB2,NOD2,S100A8,S100A9,S100A12,FCER1G,PIK3CG,CXCL9,CCL2,C3AR1,CCL4,CCL5,CCL7,CCL8,CCL11,C5AR1,CCL18,CCL20,CXCL6,VAV1,RAC2,SELL,PPBP,CXCL2,CXCL3,LGALS3,TREM1,CXCL8,CXCR2,NCKAP1L
GO: Biological Process	GO:0042330	taxis				8.56e-30	4.88e-26	8e-28	7.38e-27	66	715	SLAMF8,IL10,PDE4B,PTAFR,ADGRE2,ITGAM,ITGB2,NRP2,NOD2,CCR2,S100A8,S100A9,S100A12,FCER1G,PIK3CG,SCG2,CXCL9,HRH1,CCL2,FGF7,CCR1,C3AR1,CCL4,CCL5,PLAUR,CCL7,CCR5,BIN2,CCL8,CCL11,C5AR1,GPNMB,CCL18,CCL20,CXCL6,ALOX5,VAV1,RAC2,DOCK2,SELL,PLA2G7,GPR18,ANXA1,FOLR2,FPR1,FPR3,CH25H,CCRL2,GPR183,PPBP,CXCL2,CXCL3,LGALS3,RNASE2,EGR3,PLXNC1,LOX,SERPINE1,TREM2,TREM1,GREM1,LYN,IL6,CXCL8,CXCR2,NCKAP1L
GO: Biological Process	GO:0051240	positive regulation of multicellular organismal process				2.23e-29	1.27e-25	2.05e-27	1.89e-26	100	1692	CYBB,IL10,EREG,PDE4B,HLA-DMA,INHBA,CLEC5A,SERPINF1,GATA6,CLEC7A,EVI2B,PTPN22,TLR7,HMOX1,LY96,CHI3L1,DCSTAMP,PTAFR,ITGAM,HPSE,ITGAX,ITGB2,PTGS2,ZEB2,PLAC8,FABP4,TWIST1,LAPTM5,NOD2,CD84,CCR2,IFIH1,ADORA2B,CCN4,S100A9,TYROBP,SRPX2,PTPRC,FCER1G,SASH3,FCN1,VNN1,BTK,HRH1,CCL2,C3,CCR1,C3AR1,CCL5,CCL11,C5AR1,CCL20,FGR,MMP9,MMP12,MNDA,ALOX5,IL33,COL1A1,LILRB4,ANXA1,CASP1,IRF8,BIRC3,APOE,CR1,ADAM12,LEP,NLR…
GO: Biological Process	GO:0001819	positive regulation of cytokine production				2.86e-28	1.63e-24	2.58e-26	2.38e-25	56	529	CYBB,IL10,EREG,PDE4B,CLEC5A,GATA6,CLEC7A,PTPN22,TLR7,HMOX1,LY96,PTAFR,HPSE,PTGS2,TWIST1,LAPTM5,NOD2,CD84,CCR2,IFIH1,ADORA2B,TYROBP,PTPRC,FCER1G,SASH3,FCN1,CCL2,C3,C3AR1,CCL5,C5AR1,CCL20,FGR,MMP12,MNDA,IL33,ANXA1,CASP1,IRF8,BIRC3,LEP,NLRP3,POSTN,CD2,CD14,CD28,CD86,CD36,TLR1,TLR2,TLR4,CRTAM,SERPINE1,TREM2,LUM,IL6
GO: Biological Process	GO:1990266	neutrophil migration		1		4.4e-28	2.51e-24	3.92e-26	3.61e-25	33	142	SLAMF8,PDE4B,ITGAM,ITGB2,NOD2,S100A8,S100A9,S100A12,FCER1G,PIK3CG,CXCL9,CCL2,C3AR1,CCL4,CCL5,CCL7,CCL8,CCL11,C5AR1,CCL18,CCL20,CXCL6,VAV1,RAC2,SELL,PPBP,CXCL2,CXCL3,LGALS3,TREM1,CXCL8,CXCR2,NCKAP1L
GO: Biological Process	GO:0019221	cytokine-mediated signaling pathway		1		7.47e-28	4.25e-24	6.54e-26	6.03e-25	68	822	IL10,IL10RA,EREG,HLA-DRB4,GBP2,HMOX1,PTAFR,ITGAM,ITGAX,ITGB2,TRIM22,PTGS2,TWIST1,LAPTM5,NOD2,CCR2,PTPRC,FCER1G,FCGR1B,CXCL9,CCL2,CCR1,CCL4,CCL5,CCL7,CCR5,CCL8,CCL11,MMP1,MMP2,CCL18,CCL20,MMP9,MMP12,CXCL6,ALOX5,IL33,VAV1,COL1A2,LILRB4,ANXA1,MAP3K8,FPR1,CASP1,IRF8,BIRC3,CCRL2,SAMHD1,LCP1,PPBP,CXCL2,CXCL3,LEP,CSF2RA,CSF2RB,CD86,CD36,CD44,TREM2,IRAK3,OSMR,TNFRSF1B,IL1RN,HCK,IL6,IL7R,CXCL8,CXCR2
GO: Biological Process	GO:0050727	regulation of inflammatory response		1		1.24e-27	7.06e-24	1.07e-25	9.87e-25	50	420	SLAMF8,IL10,ACP5,SERPINF1,TLR7,PTGS2,FABP4,NOD2,CCR2,S100A8,ADORA2B,CCN4,S100A9,S100A12,PTPRC,FCER1G,FCGR2B,PIK3CG,BTK,C3,CCL5,MMP9,ALOX5,IL33,ALOX5AP,SELE,PLA2G7,NT5E,ANXA1,AOAH,CASP1,BIRC3,APOE,NLRP3,IGF1,CD28,TLR2,TLR4,SERPINE1,AOC3,CD44,TREM2,DUSP10,TNFAIP6,OSMR,TNFRSF1B,LYN,HCK,CTSS,IL6
GO: Biological Process	GO:0042110	T cell activation		1		9.02e-27	5.14e-23	7.67e-25	7.07e-24	56	566	IL10,HLA-DMA,CD300A,VSIG4,CLEC7A,TCIRG1,PTPN22,ITGAM,ITGAX,ITGB2,ITK,FGL2,LAPTM5,NOD2,CCR2,CLC,PTPRC,FCER1G,FCGR2B,CLEC4A,SASH3,VNN1,PIK3CG,MICB,CCL2,CCL5,GPNMB,CCL20,VAV1,RAC2,LILRB4,DOCK2,GPR18,ANXA1,MAP3K8,GPR183,LCP1,CR1,LEP,NLRP3,LGALS3,CD2,CD3G,IGF1,EGR3,CD28,CD86,CRTAM,CD44,CD48,DUSP10,TNFRSF1B,LYN,IL6,IL7R,NCKAP1L
GO: Biological Process	GO:0051249	regulation of lymphocyte activation				1.41e-26	8.02e-23	1.18e-24	1.09e-23	56	571	SLAMF8,IL10,HLA-DMA,INHBA,CD300A,VSIG4,CLEC7A,PTPN22,SAMSN1,FGL2,LAPTM5,NOD2,CCR2,TYROBP,CLC,PTPRC,FCGR2B,SASH3,VNN1,BTK,AHR,CCL2,CCL5,GPNMB,CCL20,FGR,MNDA,VAV1,RAC2,LILRB4,LST1,ANXA1,MAP3K8,GPR183,CR1,LEP,NLRP3,LGALS3,CD2,IGF1,EGR3,CD28,CD86,IGKC,TLR4,CRTAM,CD44,IGLC1,DUSP10,TNFRSF1B,SLAMF7,TRBC1,LYN,IL6,IL7R,NCKAP1L
GO: Biological Process	GO:0007159	leukocyte cell-cell adhesion				1.86e-26	1.06e-22	1.54e-24	1.42e-23	48	405	IL10,CFH,HLA-DMA,CD300A,VSIG4,PTPN22,ITGA4,PTAFR,ITGAM,ITGB2,FGL2,LAPTM5,NOD2,CCR2,S100A8,S100A9,PTPRC,FCGR2B,SASH3,VNN1,CCL2,CCL5,GPNMB,ALOX5,VAV1,RAC2,LILRB4,SELE,SELL,NT5E,ANXA1,MAP3K8,CR1,OLR1,LEP,NLRP3,LGALS3,IGF1,EGR3,CD28,CD86,CRTAM,CD44,DUSP10,LYN,IL6,IL7R,NCKAP1L
GO: Biological Process	GO:0002237	response to molecule of bacterial origin		1		2.77e-26	1.58e-22	2.25e-24	2.08e-23	47	389	IL10,CFH,IL10RA,PDE4B,ACP5,PTPN22,NCF2,LY96,PTAFR,PTGS2,NOD2,CD84,S100A8,S100A9,FCGR2B,CXCL9,CCL2,CCL5,CCR5,C5AR1,CXCL6,LY86,SELE,MRC1,CASP1,IRF8,PPBP,CXCL2,CXCL3,NLRP3,THBD,CSF2RB,CD14,CD86,CD36,TLR1,TLR2,TLR4,SERPINE1,TREM2,IRAK3,DUSP10,TNFRSF1B,LYN,HCK,IL6,CXCL8
GO: Biological Process	GO:0032103	positive regulation of response to external stimulus				1.53e-25	8.69e-22	1.22e-23	1.13e-22	54	553	EREG,TLR7,LY96,PTGS2,FABP4,NOD2,CCR2,S100A8,ADORA2B,CCN4,S100A9,TYROBP,S100A12,FCER1G,CLEC4A,FCN1,PIK3CG,SCG2,BTK,CCL2,C3,CCR1,C3AR1,CCL4,CCL5,CCL7,C5AR1,MMP2,CLEC10A,MMP12,LY86,MNDA,IL33,ALOX5AP,VAV1,RAC2,SELL,PLA2G7,THBD,CD28,TLR2,TLR4,CRTAM,SERPINE1,AOC3,TREM2,OSMR,LYN,HCK,CTSS,IL6,CXCL8,CXCR2,NCKAP1L
GO: Biological Process	GO:0032496	response to lipopolysaccharide		1		2.07e-25	1.18e-21	1.62e-23	1.49e-22	45	368	IL10,CFH,IL10RA,PDE4B,ACP5,PTPN22,NCF2,LY96,PTAFR,PTGS2,NOD2,CD84,S100A8,S100A9,CXCL9,CCL2,CCL5,CCR5,C5AR1,CXCL6,LY86,SELE,MRC1,CASP1,IRF8,PPBP,CXCL2,CXCL3,NLRP3,THBD,CSF2RB,CD14,CD86,CD36,TLR2,TLR4,SERPINE1,TREM2,IRAK3,DUSP10,TNFRSF1B,LYN,HCK,IL6,CXCL8
GO: Biological Process	GO:0070661	leukocyte proliferation				2.07e-25	1.18e-21	1.62e-23	1.49e-22	45	368	IL10,CD300A,VSIG4,TCIRG1,PTPN22,ITGAM,ITGAX,ITGB2,LAPTM5,CCR2,TYROBP,CLC,PTPRC,FCGR2B,SASH3,PIK3CG,BTK,AHR,CCL5,CCL8,GPNMB,MNDA,IL33,RAC2,LILRB4,DOCK2,LST1,ANXA1,GPR183,CR1,LEP,LGALS3,IGF1,CD28,CD86,TLR4,CRTAM,CD44,TREM2,GREM1,TNFRSF1B,LYN,IL6,IL7R,NCKAP1L
GO: Biological Process	GO:0002703	regulation of leukocyte mediated immunity				5.02e-25	2.86e-21	3.86e-23	3.56e-22	38	250	IL10,CD300A,CLEC7A,HMOX1,PTAFR,ADGRE2,ITGAM,ITGB2,NOD2,CD84,CCR2,ADORA2B,TYROBP,CLC,PTPRC,FCER1G,FCGR2B,SASH3,BTK,CCL2,C3,CCL20,FGR,CXCL6,VAV1,RAC2,LILRB4,CR1,LEP,NLRP3,CD28,TLR2,TLR4,CRTAM,TNFRSF1B,LYN,IL6,IL7R
GO: Biological Process	GO:0002521	leukocyte differentiation				9.15e-24	5.21e-20	6.95e-22	6.41e-21	55	626	SLAMF8,IL10,HLA-DMA,INHBA,RASSF2,TCIRG1,EVI2B,PTPN22,DCSTAMP,ITGA4,ITGAM,ITK,FGL2,CCR2,CCN4,TYROBP,PTPRC,FCER1G,FCGR2B,SASH3,VNN1,BTK,AHR,CCR1,CCL5,CCL20,MMP9,VAV1,LILRB4,DOCK2,GPR18,ANXA1,IRF8,DOCK10,GPR183,CR1,LEP,NLRP3,LGALS3,CD2,CD3G,EGR3,CD28,CD86,TLR2,TLR4,CRTAM,CD44,TREM2,DUSP10,LYN,IL6,HCLS1,IL7R,NCKAP1L
GO: Biological Process	GO:0002685	regulation of leukocyte migration				9.6e-24	5.47e-20	7.19e-22	6.64e-21	36	237	SLAMF8,CD300A,PTPN22,HMOX1,ITGA4,PTAFR,NOD2,CCR2,CCL2,CCR1,C3AR1,CCL4,CCL5,CCL7,CCL8,C5AR1,CCL20,MMP9,IL33,RAC2,SELE,SELL,PLA2G7,GPR18,ANXA1,LGALS3,TLR2,SERPINE1,AOC3,TREM2,GREM1,LYN,IL6,CXCL8,CXCR2,NCKAP1L
GO: Biological Process	GO:0002250	adaptive immune response				2.09e-23	1.19e-19	1.54e-21	1.42e-20	60	763	IL10,CFH,HLA-DMA,HLA-DRB4,TCIRG1,SAMSN1,ADCY7,ITK,FGL2,NOD2,CD84,CCR2,CLC,PTPRC,FCER1G,FCGR1B,TRAT1,FCGR2B,CLEC4A,SASH3,PIK3CG,MICB,BTK,C1QA,C1QB,C1R,C1S,C3,C3AR1,CCL20,CLEC10A,LILRB5,IL33,LILRB4,LAT2,ANXA1,LAIR1,GPR183,CR1,NLRP3,CD3G,CD28,CD86,JCHAIN,GZMB,IGKC,TLR4,CRTAM,CD44,CD48,LAMP3,IGLC1,DUSP10,TNFRSF1B,SLAMF7,TRBC1,LYN,CTSS,IL6,IL7R
GO: Biological Process	GO:1903555	regulation of tumor necrosis factor superfamily cytokine production				3.1e-23	1.77e-19	2.27e-21	2.09e-20	33	197	CYBB,IL10,ACP5,CLEC7A,PTPN22,LY96,PTAFR,TWIST1,NOD2,CD84,CCR2,IFIH1,TYROBP,PTPRC,FCER1G,CLEC4A,SASH3,CCL2,GPNMB,IL33,GPR18,LEP,CD2,IGF1,CD14,CD86,CD36,TLR1,TLR2,TLR4,TREM2,IRAK3,IL6
GO: Biological Process	GO:0071216	cellular response to biotic stimulus				3.54e-23	2.02e-19	2.55e-21	2.35e-20	37	263	IL10,CFH,PDE4B,CLEC7A,PTPN22,LY96,PTAFR,NOD2,CD84,FCGR2B,BTK,CXCL9,CCL2,CCL5,CCR5,CXCL6,LY86,MRC1,CASP1,IRF8,PPBP,CXCL2,CXCL3,NLRP3,CD14,CD86,CD36,TLR1,TLR2,TLR4,SERPINE1,TREM2,TNFRSF1B,LYN,HCK,IL6,CXCL8
GO: Biological Process	GO:0071219	cellular response to molecule of bacterial origin				9.39e-23	5.35e-19	6.69e-21	6.17e-20	35	236	IL10,CFH,PDE4B,PTPN22,LY96,PTAFR,NOD2,CD84,FCGR2B,CXCL9,CCL2,CCL5,CCR5,CXCL6,LY86,MRC1,CASP1,IRF8,PPBP,CXCL2,CXCL3,NLRP3,CD14,CD86,CD36,TLR1,TLR2,TLR4,SERPINE1,TREM2,TNFRSF1B,LYN,HCK,IL6,CXCL8
GO: Biological Process	GO:0071706	tumor necrosis factor superfamily cytokine production				9.79e-23	5.58e-19	6.88e-21	6.35e-20	33	204	CYBB,IL10,ACP5,CLEC7A,PTPN22,LY96,PTAFR,TWIST1,NOD2,CD84,CCR2,IFIH1,TYROBP,PTPRC,FCER1G,CLEC4A,SASH3,CCL2,GPNMB,IL33,GPR18,LEP,CD2,IGF1,CD14,CD86,CD36,TLR1,TLR2,TLR4,TREM2,IRAK3,IL6
GO: Biological Process	GO:0002699	positive regulation of immune effector process				1.44e-22	8.19e-19	9.98e-21	9.21e-20	36	256	IL10,CD300A,CLEC7A,PTPN22,HMOX1,PTAFR,ADGRE2,ITGAM,ITGB2,LAPTM5,NOD2,CD84,CCR2,ADORA2B,TYROBP,PTPRC,FCER1G,SASH3,BTK,CCL2,C3,FGR,IL33,VAV1,RAC2,ANXA1,CR1,NLRP3,CD28,CD86,CD36,TLR2,TLR4,CRTAM,LYN,IL6
GO: Biological Process	GO:0032680	regulation of tumor necrosis factor production				1.72e-22	9.8e-19	1.18e-20	1.09e-19	32	192	CYBB,IL10,ACP5,CLEC7A,PTPN22,LY96,PTAFR,TWIST1,NOD2,CD84,CCR2,IFIH1,TYROBP,PTPRC,FCER1G,CLEC4A,SASH3,CCL2,GPNMB,IL33,GPR18,LEP,CD2,IGF1,CD14,CD36,TLR1,TLR2,TLR4,TREM2,IRAK3,IL6
GO: Biological Process	GO:0070663	regulation of leukocyte proliferation				1.74e-22	9.89e-19	1.18e-20	1.09e-19	37	275	IL10,CD300A,VSIG4,PTPN22,LAPTM5,CCR2,TYROBP,CLC,PTPRC,FCGR2B,SASH3,BTK,AHR,CCL5,CCL8,GPNMB,MNDA,IL33,RAC2,LILRB4,LST1,ANXA1,GPR183,CR1,LEP,LGALS3,IGF1,CD28,CD86,TLR4,CRTAM,CD44,GREM1,TNFRSF1B,LYN,IL6,NCKAP1L
GO: Biological Process	GO:0006959	humoral immune response				2.28e-22	1.3e-18	1.53e-20	1.41e-19	44	414	IL10,CFH,HLA-DMA,VSIG4,GATA6,NOD2,CCR2,S100A8,S100A9,CFD,S100A12,PTPRC,FCGR2B,FCN1,CXCL9,C1QA,C1QB,C1R,CCL2,C1S,C3,C3AR1,C5AR1,CCL20,CXCL6,ALOX5,GPR183,PPBP,CR1,CXCL2,CXCL3,LGALS3,RNASE2,RNASE6,CD28,JCHAIN,IGKC,TREM2,TREM1,IGLC1,TRBC1,LYZ,IL6,CXCL8
GO: Biological Process	GO:0002253	activation of immune response		1		2.59e-22	1.47e-18	1.71e-20	1.58e-19	52	597	IL10,CFH,PDE4B,CD300A,HLA-DRB4,VSIG4,PTPN22,ITK,LAPTM5,NOD2,TYROBP,CFD,PTPRC,FCER1G,FCGR2A,TRAT1,FCGR2B,CLEC4A,FCN1,MICB,BTK,LPXN,C1QA,C1QB,C1R,C1S,C3,C3AR1,C5AR1,FGR,CLEC10A,MNDA,VAV1,LILRB4,THEMIS2,LAT2,FPR1,FPR3,LCP2,CR1,LGALS3,CD3G,CD28,TLR2,IGKC,TLR4,IGLC1,TRBC1,LYN,FYB1,HCK,NCKAP1L
GO: Biological Process	GO:0046651	lymphocyte proliferation		1		2.83e-22	1.61e-18	1.85e-20	1.71e-19	40	335	IL10,CD300A,VSIG4,PTPN22,ITGAM,ITGAX,ITGB2,LAPTM5,CCR2,TYROBP,CLC,PTPRC,FCGR2B,SASH3,PIK3CG,BTK,AHR,CCL5,GPNMB,MNDA,RAC2,LILRB4,DOCK2,LST1,ANXA1,GPR183,CR1,LEP,LGALS3,IGF1,CD28,CD86,TLR4,CRTAM,CD44,TNFRSF1B,LYN,IL6,IL7R,NCKAP1L
GO: Biological Process	GO:0080134	regulation of response to stress				2.92e-22	1.66e-18	1.89e-20	1.74e-19	85	1563	SLAMF8,IL10,EREG,RASSF2,ACP5,SERPINF1,VSIG4,CLEC7A,PTPN22,TLR7,ITGAM,HPSE,PTGS2,FABP4,FGL2,TWIST1,NOD2,CCR2,S100A8,ADORA2B,CCN4,S100A9,TYROBP,S100A12,FAP,PTPRC,FCER1G,FCGR2B,CLEC4A,FCN1,VNN1,PIK3CG,MICB,BTK,CCL2,C3,CCL5,PLAUR,MMP2,FGR,CLEC10A,MMP9,MMP12,CXCL6,MNDA,ALOX5,IL33,ALOX5AP,VAV1,SELE,PLA2G7,PRRX1,SFRP4,NT5E,ANXA1,AOAH,CASP1,BIRC3,SAMHD1,APOE,CR1,LEP,NLRP3,THBD,IGF1,MCTP1,CD28,CD36,TLR2,T…
GO: Biological Process	GO:0032943	mononuclear cell proliferation				4.41e-22	2.51e-18	2.82e-20	2.6e-19	40	339	IL10,CD300A,VSIG4,PTPN22,ITGAM,ITGAX,ITGB2,LAPTM5,CCR2,TYROBP,CLC,PTPRC,FCGR2B,SASH3,PIK3CG,BTK,AHR,CCL5,GPNMB,MNDA,RAC2,LILRB4,DOCK2,LST1,ANXA1,GPR183,CR1,LEP,LGALS3,IGF1,CD28,CD86,TLR4,CRTAM,CD44,TNFRSF1B,LYN,IL6,IL7R,NCKAP1L
GO: Biological Process	GO:0032640	tumor necrosis factor production				4.59e-22	2.62e-18	2.91e-20	2.68e-19	32	198	CYBB,IL10,ACP5,CLEC7A,PTPN22,LY96,PTAFR,TWIST1,NOD2,CD84,CCR2,IFIH1,TYROBP,PTPRC,FCER1G,CLEC4A,SASH3,CCL2,GPNMB,IL33,GPR18,LEP,CD2,IGF1,CD14,CD36,TLR1,TLR2,TLR4,TREM2,IRAK3,IL6
GO: Biological Process	GO:0071222	cellular response to lipopolysaccharide				2.36e-21	1.34e-17	1.48e-19	1.36e-18	33	225	IL10,CFH,PDE4B,PTPN22,LY96,PTAFR,NOD2,CD84,CXCL9,CCL2,CCL5,CCR5,CXCL6,LY86,MRC1,CASP1,IRF8,PPBP,CXCL2,CXCL3,NLRP3,CD14,CD86,CD36,TLR2,TLR4,SERPINE1,TREM2,TNFRSF1B,LYN,HCK,IL6,CXCL8
GO: Biological Process	GO:1903037	regulation of leukocyte cell-cell adhesion				6.84e-21	3.89e-17	4.23e-19	3.9e-18	40	365	IL10,HLA-DMA,CD300A,VSIG4,PTPN22,ITGA4,PTAFR,ITGB2,FGL2,LAPTM5,NOD2,CCR2,PTPRC,FCGR2B,SASH3,VNN1,CCL2,CCL5,GPNMB,ALOX5,VAV1,LILRB4,SELE,ANXA1,MAP3K8,CR1,LEP,NLRP3,LGALS3,IGF1,EGR3,CD28,CD86,CRTAM,CD44,DUSP10,LYN,IL6,IL7R,NCKAP1L
GO: Biological Process	GO:0050670	regulation of lymphocyte proliferation				8.86e-21	5.05e-17	5.43e-19	5.01e-18	34	252	IL10,CD300A,VSIG4,PTPN22,LAPTM5,CCR2,TYROBP,CLC,PTPRC,FCGR2B,SASH3,BTK,AHR,CCL5,GPNMB,MNDA,RAC2,LILRB4,LST1,ANXA1,GPR183,CR1,LEP,LGALS3,IGF1,CD28,CD86,TLR4,CRTAM,CD44,TNFRSF1B,LYN,IL6,NCKAP1L
GO: Biological Process	GO:0033993	response to lipid				9.94e-21	5.66e-17	6.02e-19	5.56e-18	64	977	CYBB,IL10,CFH,IL10RA,PDE4B,INHBA,CES1,ACP5,SERPINF1,GATA6,PTPN22,NCF2,LY96,PTAFR,PTGS2,NOD2,CD84,S100A8,S100A9,MICB,CXCL9,KCNMA1,AHR,CCL2,CCL5,CCR5,C5AR1,MMP2,CXCL6,PLN,LY86,COL1A1,SELE,MRC1,ANXA1,CASP1,IRF8,PPBP,CXCL2,CXCL3,LEP,NLRP3,AREG,POSTN,THBD,ABCG1,IGF1,CSF2RB,CD14,CD86,LOX,CD36,TLR2,TLR4,SERPINE1,TREM2,IRAK3,DUSP10,TNFRSF1B,LYN,IL1RN,HCK,IL6,CXCL8
GO: Biological Process	GO:0032944	regulation of mononuclear cell proliferation				1.3e-20	7.42e-17	7.81e-19	7.21e-18	34	255	IL10,CD300A,VSIG4,PTPN22,LAPTM5,CCR2,TYROBP,CLC,PTPRC,FCGR2B,SASH3,BTK,AHR,CCL5,GPNMB,MNDA,RAC2,LILRB4,LST1,ANXA1,GPR183,CR1,LEP,LGALS3,IGF1,CD28,CD86,TLR4,CRTAM,CD44,TNFRSF1B,LYN,IL6,NCKAP1L
GO: Biological Process	GO:0002683	negative regulation of immune system process				1.51e-20	8.58e-17	8.9e-19	8.21e-18	44	460	SLAMF8,IL10,INHBA,CD300A,VSIG4,PTPN22,HMOX1,SAMSN1,FGL2,LAPTM5,NOD2,CD84,CCR2,TYROBP,PTPRC,FCER1G,FCGR2B,MICB,BTK,LPXN,CCL2,GPNMB,FGR,MMP12,MNDA,IL33,LILRB4,LST1,GPR18,ANXA1,SAMHD1,CR1,MILR1,LGALS3,IGF1,CD86,TLR4,CRTAM,CD44,IRAK3,DUSP10,GREM1,LYN,IL7R
GO: Biological Process	GO:0050863	regulation of T cell activation		1		1.52e-20	8.63e-17	8.9e-19	8.21e-18	40	373	IL10,HLA-DMA,CD300A,VSIG4,PTPN22,FGL2,LAPTM5,NOD2,CCR2,CLC,PTPRC,FCGR2B,SASH3,VNN1,CCL2,CCL5,GPNMB,CCL20,VAV1,RAC2,LILRB4,ANXA1,MAP3K8,CR1,LEP,NLRP3,LGALS3,CD2,IGF1,EGR3,CD28,CD86,CRTAM,CD44,DUSP10,TNFRSF1B,LYN,IL6,IL7R,NCKAP1L
GO: Biological Process	GO:0030334	regulation of cell migration				3.09e-20	1.76e-16	1.8e-18	1.66e-17	67	1089	SLAMF8,MYO5A,CD300A,SERPINF1,CLEC7A,PTPN22,HMOX1,ITGA4,PTAFR,ITGAX,PTGS2,NRP2,MEOX2,NOD2,CCR2,ADORA2B,CCN4,ADORA3,SRPX2,PTPRC,PIK3CG,CCL2,FGF7,CCR1,C3AR1,CCL4,CCL5,CCL7,CCL8,CCL11,C5AR1,GPNMB,MMP2,CCL20,FGR,MMP9,MMP12,IL33,RAC2,COL1A1,SELE,SELL,PLA2G7,GPR18,ANXA1,DOCK10,GPR183,APOE,LGALS3,POSTN,IGF1,MCTP1,PLXNC1,TLR2,SERPINE1,AOC3,TREM2,DUSP10,GREM1,TNFAIP6,LYN,IL1RN,IL6,CXCL8,CXCR2,NCKAP1L,PHACT…
GO: Biological Process	GO:1903557	positive regulation of tumor necrosis factor superfamily cytokine production				3.16e-20	1.8e-16	1.82e-18	1.68e-17	24	108	CYBB,CLEC7A,LY96,PTAFR,TWIST1,NOD2,CD84,CCR2,IFIH1,TYROBP,PTPRC,FCER1G,SASH3,CCL2,IL33,LEP,CD2,CD14,CD86,CD36,TLR1,TLR2,TLR4,IL6
GO: Biological Process	GO:0030155	regulation of cell adhesion				3.34e-20	1.9e-16	1.9e-18	1.75e-17	58	827	IL10,HLA-DMA,CD300A,VSIG4,PTPN22,ITGA4,PTAFR,ITGB2,FGL2,LAPTM5,NOD2,CCR2,PTPRC,ADAMDEC1,FCGR2B,SASH3,VNN1,PIK3CG,LPXN,CCL2,CCL5,PLAUR,GPNMB,MMP2,MMP12,ALOX5,VAV1,RAC2,COL1A1,LILRB4,SELE,COL8A1,COL16A1,ANXA1,MAP3K8,CR1,LEP,NLRP3,LGALS3,CYTIP,POSTN,IGF1,EGR3,PLXNC1,CD28,CD86,CD36,CRTAM,SERPINE1,CD44,DUSP10,GREM1,LYN,IL1RN,IL6,IL7R,CXCL8,NCKAP1L
GO: Biological Process	GO:1902105	regulation of leukocyte differentiation				3.45e-20	1.97e-16	1.95e-18	1.79e-17	38	340	SLAMF8,IL10,HLA-DMA,INHBA,RASSF2,EVI2B,DCSTAMP,ITGAM,FGL2,CCR2,TYROBP,PTPRC,FCGR2B,SASH3,VNN1,BTK,CCR1,CCL5,CCL20,LILRB4,ANXA1,CR1,NLRP3,LGALS3,CD2,EGR3,CD28,CD86,TLR4,CRTAM,CD44,TREM2,DUSP10,LYN,IL6,HCLS1,IL7R,NCKAP1L
GO: Biological Process	GO:0050867	positive regulation of cell activation				4.13e-20	2.35e-16	2.31e-18	2.13e-17	44	472	IL10,HLA-DMA,CLEC7A,PTPN22,PTAFR,ITGAM,ITGB2,NOD2,CCR2,ADORA2B,TYROBP,PTPRC,FCER1G,SASH3,VNN1,BTK,CCL2,CCL5,FGR,PLEK,IL33,VAV1,LILRB4,ANXA1,MAP3K8,GPR183,CR1,LEP,NLRP3,CD2,IGF1,EGR3,CD28,CD86,IGKC,TLR4,TREM2,IGLC1,DUSP10,TRBC1,LYN,IL6,IL7R,NCKAP1L
GO: Biological Process	GO:2000145	regulation of cell motility				4.59e-20	2.61e-16	2.54e-18	2.34e-17	69	1159	SLAMF8,EREG,MYO5A,CD300A,SERPINF1,CLEC7A,PTPN22,HMOX1,ITGA4,PTAFR,ITGAX,PTGS2,TWIST1,NRP2,MEOX2,NOD2,CCR2,ADORA2B,CCN4,ADORA3,SRPX2,PTPRC,PIK3CG,CCL2,FGF7,CCR1,C3AR1,CCL4,CCL5,CCL7,CCL8,CCL11,C5AR1,GPNMB,MMP2,CCL20,FGR,MMP9,MMP12,IL33,RAC2,COL1A1,SELE,SELL,PLA2G7,GPR18,ANXA1,DOCK10,GPR183,APOE,LGALS3,POSTN,IGF1,MCTP1,PLXNC1,TLR2,SERPINE1,AOC3,TREM2,DUSP10,GREM1,TNFAIP6,LYN,IL1RN,IL6,CXCL8,CXCR2,N…
GO: Biological Process	GO:0002696	positive regulation of leukocyte activation				6.75e-20	3.85e-16	3.7e-18	3.41e-17	43	455	IL10,HLA-DMA,CLEC7A,PTPN22,PTAFR,ITGAM,ITGB2,NOD2,CCR2,ADORA2B,TYROBP,PTPRC,FCER1G,SASH3,VNN1,BTK,CCL2,CCL5,FGR,IL33,VAV1,LILRB4,ANXA1,MAP3K8,GPR183,CR1,LEP,NLRP3,CD2,IGF1,EGR3,CD28,CD86,IGKC,TLR4,TREM2,IGLC1,DUSP10,TRBC1,LYN,IL6,IL7R,NCKAP1L
GO: Biological Process	GO:0098609	cell-cell adhesion				9.49e-20	5.41e-16	5.15e-18	4.75e-17	62	961	IL10,CFH,HLA-DMA,CD300A,VSIG4,PTPN22,ITGA4,PTAFR,ITGAM,ITGAX,ITGB2,FGL2,LAPTM5,NOD2,CD84,CCR2,S100A8,S100A9,SRPX2,PTPRC,FCGR2B,SASH3,VNN1,PIK3CG,CCL2,COL14A1,CCL5,PLAUR,GPNMB,PLEK,ALOX5,VAV1,RAC2,LILRB4,SELE,SELL,COL8A2,COMP,NT5E,ANXA1,MAP3K8,CR1,OLR1,LEP,MILR1,NLRP3,LGALS3,CD2,IGF1,EGR3,CD28,CD86,CRTAM,CD44,CD53,CSTA,DUSP10,LYN,IL1RN,IL6,IL7R,NCKAP1L
GO: Biological Process	GO:0040012	regulation of locomotion				1.13e-19	6.42e-16	6.06e-18	5.59e-17	70	1210	SLAMF8,EREG,MYO5A,CD300A,SERPINF1,CLEC7A,PTPN22,HMOX1,ITGA4,PTAFR,ITGAX,PTGS2,TWIST1,NRP2,MEOX2,NOD2,CCR2,ADORA2B,CCN4,ADORA3,SRPX2,PTPRC,PIK3CG,SCG2,CCL2,FGF7,CCR1,C3AR1,CCL4,CCL5,CCL7,CCL8,CCL11,C5AR1,GPNMB,MMP2,CCL20,FGR,MMP9,MMP12,IL33,RAC2,COL1A1,SELE,SELL,PLA2G7,GPR18,ANXA1,DOCK10,GPR183,APOE,LGALS3,POSTN,IGF1,MCTP1,PLXNC1,TLR2,SERPINE1,AOC3,TREM2,DUSP10,GREM1,TNFAIP6,LYN,IL1RN,IL6,CXCL8,CX…
GO: Biological Process	GO:1903131	mononuclear cell differentiation				1.29e-19	7.34e-16	6.86e-18	6.33e-17	44	486	SLAMF8,IL10,HLA-DMA,INHBA,TCIRG1,PTPN22,DCSTAMP,ITGA4,ITK,FGL2,CCR2,PTPRC,FCER1G,FCGR2B,SASH3,VNN1,BTK,AHR,CCL20,VAV1,LILRB4,DOCK2,GPR18,ANXA1,IRF8,DOCK10,GPR183,CR1,LEP,NLRP3,LGALS3,CD2,CD3G,EGR3,CD28,CD86,CRTAM,CD44,TREM2,DUSP10,LYN,IL6,IL7R,NCKAP1L
GO: Biological Process	GO:0071674	mononuclear cell migration				1.53e-19	8.71e-16	8.07e-18	7.44e-17	30	204	SLAMF8,ITGA4,CCR2,S100A12,PIK3CG,CCL2,CCR1,C3AR1,CCL4,CCL5,CCL7,CCR5,CCL8,CCL11,C5AR1,CCL18,CCL20,ALOX5,PLA2G7,ANXA1,FOLR2,CH25H,GPR183,LGALS3,CRTAM,SERPINE1,GREM1,LYN,IL6,CXCR2
GO: Biological Process	GO:0051270	regulation of cellular component movement				1.61e-19	9.18e-16	8.43e-18	7.77e-17	71	1250	SLAMF8,EREG,PDE4B,MYO5A,CD300A,SERPINF1,CLEC7A,PTPN22,HMOX1,ITGA4,PTAFR,ITGAX,PTGS2,TWIST1,NRP2,MEOX2,NOD2,CCR2,ADORA2B,CCN4,ADORA3,SRPX2,PTPRC,PIK3CG,CCL2,FGF7,CCR1,C3AR1,CCL4,CCL5,CCL7,CCL8,CCL11,C5AR1,GPNMB,MMP2,CCL20,FGR,MMP9,MMP12,PLN,IL33,RAC2,COL1A1,SELE,SELL,PLA2G7,GPR18,ANXA1,DOCK10,GPR183,APOE,LGALS3,POSTN,IGF1,MCTP1,PLXNC1,TLR2,SERPINE1,AOC3,TREM2,DUSP10,GREM1,TNFAIP6,LYN,IL1RN,IL6,CXC…
GO: Biological Process	GO:1901700	response to oxygen-containing compound				2.09e-19	1.19e-15	1.08e-17	1e-16	89	1875	CYBB,IL10,CFH,IL10RA,EREG,PDE4B,MYO5A,INHBA,CES1,ACP5,SERPINF1,GATA6,CLEC7A,TCIRG1,PTPN22,NCF2,HMOX1,LY96,ITGA4,PTAFR,PTGDR,ME1,PTGS2,ADCY7,NOD2,CD84,S100A8,ADORA2B,S100A9,PTPRE,FCGR2B,PIK3CG,MICB,BTK,CXCL9,KCNMA1,AHR,HRH1,CCL2,CCL5,GNA15,CCL7,CCR5,C5AR1,MMP2,MMP9,MMP12,CXCL6,PLN,LY86,COL1A1,COL1A2,SELE,SELL,MRC1,COL16A1,ANXA1,FOLR2,NR4A2,CASP1,IRF8,TDO2,APOE,PPBP,CXCL2,CXCL3,SLC1A3,AQP9,LEP,NLRP…
GO: Biological Process	GO:0002548	monocyte chemotaxis				2.75e-19	1.57e-15	1.41e-17	1.3e-16	20	71	SLAMF8,CCR2,S100A12,CCL2,CCR1,CCL4,CCL5,CCL7,CCL8,CCL11,CCL18,CCL20,PLA2G7,ANXA1,FOLR2,LGALS3,SERPINE1,GREM1,LYN,IL6
GO: Biological Process	GO:0032760	positive regulation of tumor necrosis factor production				2.78e-19	1.58e-15	1.41e-17	1.3e-16	23	105	CYBB,CLEC7A,LY96,PTAFR,TWIST1,NOD2,CD84,CCR2,IFIH1,TYROBP,PTPRC,FCER1G,SASH3,CCL2,IL33,LEP,CD2,CD14,CD36,TLR1,TLR2,TLR4,IL6
GO: Biological Process	GO:0045576	mast cell activation				4.08e-19	2.32e-15	2.06e-17	1.9e-16	21	83	CD300A,HMOX1,ADGRE2,PTGDR,CD84,ADORA2B,S100A12,FCER1G,PTPRE,FCGR2B,PIK3CG,BTK,FGR,RAC2,LAT2,LCP2,MILR1,TLR4,CD48,LYN,FYB1
GO: Biological Process	GO:0042127	regulation of cell population proliferation				4.83e-19	2.75e-15	2.41e-17	2.23e-16	91	1973	IL10,EREG,INHBA,CD300A,SERPINF1,VSIG4,GATA6,CLEC7A,TCIRG1,PTPN22,HMOX1,ITGA4,PTAFR,HPSE,ITGAX,PTGS2,PLAC8,FABP4,TWIST1,NRP2,LAPTM5,NOD2,CCR2,ADORA2B,CCN4,TYROBP,ADORA3,FAP,CLC,PTPRC,FCGR2B,SASH3,SCG2,BTK,CXCL9,AHR,CCL2,FGF7,C3AR1,CCL5,CCL8,CCL11,SRPX,C5AR1,GPNMB,MMP2,MMP9,MMP12,MNDA,ALOX5,IL33,RAC2,LILRB4,LST1,PRRX1,SFRP4,RARRES1,COMP,ANXA1,FOLR2,GPR183,APOE,CR1,OGN,LEP,AREG,LGALS3,ZFPM2,IGF1,TIM…
GO: Biological Process	GO:0031349	positive regulation of defense response				8e-19	4.56e-15	3.96e-17	3.66e-16	39	394	EREG,TLR7,PTGS2,FABP4,NOD2,CCR2,S100A8,ADORA2B,CCN4,S100A9,TYROBP,S100A12,FCER1G,CLEC4A,FCN1,PIK3CG,BTK,C3,CCL5,MMP2,CLEC10A,MMP12,MNDA,IL33,ALOX5AP,VAV1,PLA2G7,CD28,TLR2,TLR4,CRTAM,SERPINE1,AOC3,TREM2,OSMR,LYN,HCK,CTSS,IL6
GO: Biological Process	GO:2000026	regulation of multicellular organismal development				9.81e-19	5.59e-15	4.82e-17	4.44e-16	81	1632	CYBB,SLAMF8,IL10,HLA-DMA,INHBA,RASSF2,ASPN,SERPINF1,GATA6,EVI2B,HMOX1,CHI3L1,DCSTAMP,ITGAM,HPSE,ITGAX,ITGB2,ZEB2,FGL2,TWIST1,CCR2,CCN4,TYROBP,SRPX2,PTPRC,FCGR2B,SASH3,VNN1,BTK,AHR,CCL2,COL14A1,C3,CCR1,C3AR1,CCL5,CCL11,GPR171,C5AR1,GPNMB,CCL20,MMP9,ALOX5,IL33,LILRB4,SFRP4,COMP,ANXA1,APOE,OMD,CR1,ADAM12,LEP,NLRP3,LGALS3,ZFPM2,CD2,THBS2,IGF1,EGR3,PLXNC1,CD28,CD86,LOX,CD36,TLR2,TLR4,CRTAM,SERPINE1,CD…
GO: Biological Process	GO:0040017	positive regulation of locomotion				2.23e-18	1.27e-14	1.09e-16	1e-15	50	678	MYO5A,CLEC7A,HMOX1,ITGA4,PTAFR,ITGAX,PTGS2,TWIST1,NRP2,CCR2,ADORA2B,CCN4,SRPX2,PTPRC,PIK3CG,SCG2,CCL2,FGF7,CCR1,C3AR1,CCL4,CCL5,CCL7,CCL8,CCL11,C5AR1,GPNMB,MMP2,CCL20,FGR,MMP9,RAC2,COL1A1,SELE,SELL,PLA2G7,ANXA1,LGALS3,POSTN,IGF1,TLR2,SERPINE1,AOC3,TREM2,TNFAIP6,LYN,IL6,CXCL8,CXCR2,NCKAP1L
GO: Biological Process	GO:0050729	positive regulation of inflammatory response				2.45e-18	1.39e-14	1.18e-16	1.09e-15	26	158	TLR7,PTGS2,FABP4,CCR2,S100A8,ADORA2B,CCN4,S100A9,S100A12,FCER1G,PIK3CG,BTK,C3,CCL5,IL33,ALOX5AP,PLA2G7,CD28,TLR2,TLR4,SERPINE1,AOC3,TREM2,OSMR,CTSS,IL6
GO: Biological Process	GO:0002687	positive regulation of leukocyte migration				2.88e-18	1.64e-14	1.38e-16	1.27e-15	26	159	ITGA4,PTAFR,CCR2,CCL2,CCR1,C3AR1,CCL4,CCL5,CCL7,CCL8,C5AR1,CCL20,MMP9,RAC2,SELE,SELL,PLA2G7,LGALS3,TLR2,SERPINE1,AOC3,TREM2,IL6,CXCL8,CXCR2,NCKAP1L
GO: Biological Process	GO:0030335	positive regulation of cell migration				3.74e-18	2.13e-14	1.77e-16	1.64e-15	48	633	MYO5A,CLEC7A,HMOX1,ITGA4,PTAFR,ITGAX,PTGS2,NRP2,CCR2,ADORA2B,CCN4,SRPX2,PTPRC,PIK3CG,CCL2,FGF7,CCR1,C3AR1,CCL4,CCL5,CCL7,CCL8,CCL11,C5AR1,GPNMB,MMP2,CCL20,FGR,MMP9,RAC2,COL1A1,SELE,SELL,PLA2G7,ANXA1,LGALS3,POSTN,IGF1,TLR2,SERPINE1,AOC3,TREM2,TNFAIP6,LYN,IL6,CXCL8,CXCR2,NCKAP1L
GO: Biological Process	GO:2000147	positive regulation of cell motility				4.36e-18	2.48e-14	2.05e-16	1.89e-15	49	662	MYO5A,CLEC7A,HMOX1,ITGA4,PTAFR,ITGAX,PTGS2,TWIST1,NRP2,CCR2,ADORA2B,CCN4,SRPX2,PTPRC,PIK3CG,CCL2,FGF7,CCR1,C3AR1,CCL4,CCL5,CCL7,CCL8,CCL11,C5AR1,GPNMB,MMP2,CCL20,FGR,MMP9,RAC2,COL1A1,SELE,SELL,PLA2G7,ANXA1,LGALS3,POSTN,IGF1,TLR2,SERPINE1,AOC3,TREM2,TNFAIP6,LYN,IL6,CXCL8,CXCR2,NCKAP1L
GO: Biological Process	GO:0022407	regulation of cell-cell adhesion				7.46e-18	4.25e-14	3.48e-16	3.21e-15	42	491	IL10,HLA-DMA,CD300A,VSIG4,PTPN22,ITGA4,PTAFR,ITGB2,FGL2,LAPTM5,NOD2,CCR2,PTPRC,FCGR2B,SASH3,VNN1,CCL2,CCL5,PLAUR,GPNMB,ALOX5,VAV1,LILRB4,SELE,ANXA1,MAP3K8,CR1,LEP,NLRP3,LGALS3,IGF1,EGR3,CD28,CD86,CRTAM,CD44,DUSP10,LYN,IL1RN,IL6,IL7R,NCKAP1L
GO: Biological Process	GO:0006909	phagocytosis				8.56e-18	4.87e-14	3.96e-16	3.66e-15	38	399	CD300A,CLEC7A,NCF2,NCF4,ITGAM,ITGB2,NOD2,CCR2,TYROBP,PTPRC,FCER1G,FCGR2A,FCGR2B,FCN1,CCL2,C3,BIN2,SRPX,FGR,VAV1,RAC2,DOCK2,ANXA1,IRF8,LEP,MSR1,CD3G,CD14,CD36,TLR2,IGKC,TLR4,TREM2,IGLC1,TRBC1,LYN,HCK,NCKAP1L
GO: Biological Process	GO:0001944	vasculature development				9.72e-18	5.53e-14	4.46e-16	4.12e-15	57	903	CYBB,IL10,CFH,EREG,SERPINF1,GATA6,HMOX1,CHI3L1,HPSE,ITGAX,ITGB2,PTGS2,TWIST1,NRP2,MEOX2,CCR2,CFD,FAP,SRPX2,PIK3CG,SCG2,AHR,CCL2,C3,C3AR1,CCL5,CCL11,C5AR1,GPNMB,MMP2,MMP9,ALOX5,COL1A1,COL1A2,COL5A1,COL8A1,COL8A2,PRRX1,COL15A1,COMP,PLXDC1,ANXA1,APOE,ADAM12,LEP,LGALS3,ZFPM2,THBS2,IGF1,EGR3,LOX,CD36,SERPINE1,GREM1,IL6,CXCL8,CXCR2
GO: Biological Process	GO:0050866	negative regulation of cell activation				1.02e-17	5.8e-14	4.64e-16	4.28e-15	30	236	IL10,INHBA,CD300A,VSIG4,PTPN22,HMOX1,SAMSN1,FGL2,LAPTM5,CD84,CCR2,TYROBP,PTPRC,FCGR2B,BTK,GPNMB,FGR,MNDA,LILRB4,LST1,ANXA1,APOE,CR1,MILR1,LGALS3,THBD,CD86,CRTAM,CD44,LYN
GO: Biological Process	GO:0002757	immune response-activating signal transduction				1.34e-17	7.64e-14	6.07e-16	5.6e-15	42	499	PDE4B,CD300A,HLA-DRB4,PTPN22,ITK,LAPTM5,TYROBP,PTPRC,FCER1G,FCGR2A,TRAT1,FCGR2B,CLEC4A,FCN1,MICB,BTK,LPXN,C3AR1,C5AR1,FGR,CLEC10A,MNDA,VAV1,LILRB4,THEMIS2,LAT2,FPR1,FPR3,LCP2,CR1,LGALS3,CD3G,CD28,TLR2,IGKC,TLR4,IGLC1,TRBC1,LYN,FYB1,HCK,NCKAP1L
GO: Biological Process	GO:0051272	positive regulation of cellular component movement				1.38e-17	7.87e-14	6.2e-16	5.72e-15	49	681	MYO5A,CLEC7A,HMOX1,ITGA4,PTAFR,ITGAX,PTGS2,TWIST1,NRP2,CCR2,ADORA2B,CCN4,SRPX2,PTPRC,PIK3CG,CCL2,FGF7,CCR1,C3AR1,CCL4,CCL5,CCL7,CCL8,CCL11,C5AR1,GPNMB,MMP2,CCL20,FGR,MMP9,RAC2,COL1A1,SELE,SELL,PLA2G7,ANXA1,LGALS3,POSTN,IGF1,TLR2,SERPINE1,AOC3,TREM2,TNFAIP6,LYN,IL6,CXCL8,CXCR2,NCKAP1L
GO: Biological Process	GO:0030098	lymphocyte differentiation				1.66e-17	9.45e-14	7.39e-16	6.81e-15	39	430	SLAMF8,IL10,HLA-DMA,INHBA,TCIRG1,PTPN22,ITGA4,ITK,FGL2,CCR2,PTPRC,FCER1G,FCGR2B,SASH3,VNN1,BTK,AHR,CCL20,VAV1,LILRB4,DOCK2,GPR18,ANXA1,DOCK10,GPR183,CR1,LEP,NLRP3,CD2,CD3G,EGR3,CD28,CD86,CRTAM,CD44,DUSP10,IL6,IL7R,NCKAP1L
GO: Biological Process	GO:0048514	blood vessel morphogenesis				1.69e-17	9.62e-14	7.46e-16	6.88e-15	52	768	CYBB,IL10,CFH,EREG,SERPINF1,GATA6,HMOX1,CHI3L1,HPSE,ITGAX,ITGB2,PTGS2,TWIST1,NRP2,MEOX2,CCR2,FAP,SRPX2,PIK3CG,SCG2,AHR,CCL2,C3,C3AR1,CCL5,CCL11,C5AR1,GPNMB,MMP2,MMP9,ALOX5,COL8A1,COL8A2,PRRX1,COL15A1,COMP,PLXDC1,ANXA1,APOE,ADAM12,LEP,LGALS3,ZFPM2,THBS2,EGR3,LOX,CD36,SERPINE1,GREM1,IL6,CXCL8,CXCR2
GO: Biological Process	GO:1903706	regulation of hemopoiesis				2.31e-17	1.32e-13	1.01e-15	9.35e-15	41	482	SLAMF8,IL10,HLA-DMA,INHBA,RASSF2,EVI2B,DCSTAMP,ITGAM,FGL2,CCR2,TYROBP,PTPRC,FCGR2B,SASH3,VNN1,BTK,CCR1,CCL5,GPR171,CCL20,LILRB4,ANXA1,CR1,LEP,NLRP3,LGALS3,CD2,EGR3,CD28,CD86,LOX,TLR4,CRTAM,CD44,TREM2,DUSP10,LYN,IL6,HCLS1,IL7R,NCKAP1L
GO: Biological Process	GO:0009611	response to wounding				2.4e-17	1.37e-13	1.04e-15	9.61e-15	51	746	IL10,CFH,EREG,INHBA,GATA6,CLEC7A,HMOX1,HPSE,CCR2,S100A8,CCN4,S100A9,TYROBP,ADORA3,FAP,FCER1G,PIK3CG,CCL2,FGF7,C3,CCR1,GNA15,PLAUR,MMP2,PLEK,MMP12,ALOX5,VAV1,COL1A1,COL1A2,COL5A1,COMP,ANXA1,APOE,LCP1,LCP2,PAPSS2,SLC1A3,ZFPM2,MMRN1,POSTN,THBD,IGF1,LOX,CD36,TLR4,SERPINE1,CD44,DUSP10,LYN,IL6
GO: Biological Process	GO:1990868	response to chemokine				2.61e-17	1.49e-13	1.12e-15	1.03e-14	21	100	CCR2,CXCL9,CCL2,CCR1,CCL4,CCL5,CCL7,CCR5,CCL8,CCL11,CCL18,CCL20,CXCL6,CCRL2,PPBP,CXCL2,CXCL3,LOX,TREM2,CXCL8,CXCR2
GO: Biological Process	GO:1990869	cellular response to chemokine				2.61e-17	1.49e-13	1.12e-15	1.03e-14	21	100	CCR2,CXCL9,CCL2,CCR1,CCL4,CCL5,CCL7,CCR5,CCL8,CCL11,CCL18,CCL20,CXCL6,CCRL2,PPBP,CXCL2,CXCL3,LOX,TREM2,CXCL8,CXCR2
GO: Biological Process	GO:1903039	positive regulation of leukocyte cell-cell adhesion				2.86e-17	1.63e-13	1.22e-15	1.12e-14	31	264	HLA-DMA,PTPN22,ITGA4,PTAFR,ITGB2,NOD2,CCR2,PTPRC,SASH3,VNN1,CCL2,CCL5,ALOX5,VAV1,LILRB4,SELE,ANXA1,MAP3K8,CR1,LEP,NLRP3,IGF1,EGR3,CD28,CD86,CD44,DUSP10,LYN,IL6,IL7R,NCKAP1L
GO: Biological Process	GO:0001568	blood vessel development				3.02e-17	1.72e-13	1.27e-15	1.17e-14	55	866	CYBB,IL10,CFH,EREG,SERPINF1,GATA6,HMOX1,CHI3L1,HPSE,ITGAX,ITGB2,PTGS2,TWIST1,NRP2,MEOX2,CCR2,FAP,SRPX2,PIK3CG,SCG2,AHR,CCL2,C3,C3AR1,CCL5,CCL11,C5AR1,GPNMB,MMP2,MMP9,ALOX5,COL1A1,COL1A2,COL5A1,COL8A1,COL8A2,PRRX1,COL15A1,COMP,PLXDC1,ANXA1,APOE,ADAM12,LEP,LGALS3,ZFPM2,THBS2,EGR3,LOX,CD36,SERPINE1,GREM1,IL6,CXCL8,CXCR2
GO: Biological Process	GO:0002886	regulation of myeloid leukocyte mediated immunity				3.33e-17	1.9e-13	1.39e-15	1.28e-14	18	66	CD300A,HMOX1,PTAFR,ADGRE2,ITGAM,ITGB2,CD84,CCR2,ADORA2B,TYROBP,FCER1G,FCGR2B,BTK,C3,FGR,CXCL6,RAC2,LYN
GO: Biological Process	GO:0010628	positive regulation of gene expression				3.36e-17	1.91e-13	1.39e-15	1.28e-14	69	1312	CYBB,IL10,EREG,PDE4B,INHBA,CLEC5A,GATA6,CLEC7A,ACTG2,PTPN22,TLR7,HMOX1,LY96,PTAFR,HPSE,ITGAX,PTGS2,TWIST1,LAPTM5,NOD2,CD84,CCR2,PRR16,IFIH1,ADORA2B,TYROBP,PTPRC,FCER1G,SASH3,FCN1,CCL2,FGF7,C3,C3AR1,CCL5,C5AR1,CCL20,FGR,MMP12,MNDA,IL33,NIBAN1,SFRP4,ANXA1,TENT5A,CASP1,IRF8,BIRC3,LEP,NLRP3,POSTN,CD2,IGF1,CD14,CD28,CD86,CD36,TLR1,TLR2,TLR4,CRTAM,SERPINE1,CD44,TREM2,LAMP3,LUM,IL6,IL7R,CXCL8
GO: Biological Process	GO:0002764	immune response-regulating signaling pathway				3.37e-17	1.92e-13	1.39e-15	1.28e-14	43	537	PDE4B,CD300A,HLA-DRB4,PTPN22,ITK,LAPTM5,TYROBP,PTPRC,FCER1G,FCGR1B,FCGR2A,TRAT1,FCGR2B,CLEC4A,FCN1,MICB,BTK,LPXN,C3AR1,C5AR1,FGR,CLEC10A,MNDA,VAV1,LILRB4,THEMIS2,LAT2,FPR1,FPR3,LCP2,CR1,LGALS3,CD3G,CD28,TLR2,IGKC,TLR4,IGLC1,TRBC1,LYN,FYB1,HCK,NCKAP1L
GO: Biological Process	GO:0070098	chemokine-mediated signaling pathway				3.66e-17	2.09e-13	1.5e-15	1.38e-14	20	89	CCR2,CXCL9,CCL2,CCR1,CCL4,CCL5,CCL7,CCR5,CCL8,CCL11,CCL18,CCL20,CXCL6,CCRL2,PPBP,CXCL2,CXCL3,TREM2,CXCL8,CXCR2
GO: Biological Process	GO:0002695	negative regulation of leukocyte activation				4.14e-17	2.36e-13	1.69e-15	1.55e-14	28	211	IL10,INHBA,CD300A,VSIG4,PTPN22,HMOX1,SAMSN1,FGL2,LAPTM5,CD84,CCR2,TYROBP,PTPRC,FCGR2B,BTK,GPNMB,FGR,MNDA,LILRB4,LST1,ANXA1,CR1,MILR1,LGALS3,CD86,CRTAM,CD44,LYN
GO: Biological Process	GO:1902533	positive regulation of intracellular signal transduction				6.13e-17	3.49e-13	2.48e-15	2.28e-14	63	1129	EREG,RASSF2,CLEC7A,PTPN22,TLR7,HMOX1,CHI3L1,HPSE,TRIM22,ZEB2,LAPTM5,NOD2,CD84,S100A8,ADORA2B,S100A9,S100A12,PTPRC,TRAT1,FCGR2B,PIK3CG,CCL2,FGF7,C3,CCR1,CCL4,CCL5,CCL7,CCL8,CCL11,C5AR1,GPNMB,CCL18,CCL20,FGR,VAV1,RAC2,DOCK2,MDFIC,GPR18,GPR65,FPR1,CASP1,BIRC3,GPR183,APOE,LEP,AREG,IGF1,CD14,TIMP2,CD28,CD86,CD36,TLR2,TLR4,CD44,TREM2,GREM1,LYN,IL1RN,IL6,HCLS1
GO: Biological Process	GO:0051241	negative regulation of multicellular organismal process				6.47e-17	3.69e-13	2.6e-15	2.39e-14	68	1295	SLAMF8,IL10,PDE4B,INHBA,ASPN,ACP5,SERPINF1,VSIG4,GATA6,PTPN22,HMOX1,PTGS2,ADCY7,PLAC8,FGL2,TWIST1,LAPTM5,MEOX2,NOD2,CD84,CCR2,IFIH1,ADORA2B,CCN4,TYROBP,FAP,PTPRC,FCGR2B,CLEC4A,PIK3CG,BTK,KCNMA1,AHR,CCL2,CCR1,PLAUR,CCL11,GPNMB,MMP2,PLN,ALOX5,IL33,LILRB4,GPR18,ANXA1,APOC1,APOE,CR1,LEP,NLRP3,ZFPM2,THBD,THBS2,IGF1,CD86,CD36,TLR2,TLR4,SERPINE1,CD44,TREM2,IRAK3,DUSP10,GREM1,TNFRSF1B,LYN,IL6,NCKAP1L
GO: Biological Process	GO:0022409	positive regulation of cell-cell adhesion				6.79e-17	3.87e-13	2.71e-15	2.5e-14	33	313	IL10,HLA-DMA,PTPN22,ITGA4,PTAFR,ITGB2,NOD2,CCR2,PTPRC,SASH3,VNN1,CCL2,CCL5,PLAUR,ALOX5,VAV1,LILRB4,SELE,ANXA1,MAP3K8,CR1,LEP,NLRP3,IGF1,EGR3,CD28,CD86,CD44,DUSP10,LYN,IL6,IL7R,NCKAP1L
GO: Biological Process	GO:0002429	immune response-activating cell surface receptor signaling pathway				7.34e-17	4.18e-13	2.9e-15	2.68e-14	41	498	PDE4B,CD300A,HLA-DRB4,PTPN22,ITK,LAPTM5,TYROBP,PTPRC,FCER1G,FCGR2A,TRAT1,FCGR2B,CLEC4A,FCN1,MICB,BTK,LPXN,C3AR1,C5AR1,FGR,CLEC10A,MNDA,VAV1,LILRB4,THEMIS2,LAT2,FPR1,FPR3,LCP2,CR1,LGALS3,CD3G,CD28,TLR2,IGKC,IGLC1,TRBC1,LYN,FYB1,HCK,NCKAP1L
GO: Biological Process	GO:0001525	angiogenesis				9.03e-17	5.14e-13	3.55e-15	3.27e-14	47	658	CYBB,IL10,CFH,EREG,SERPINF1,GATA6,HMOX1,CHI3L1,HPSE,ITGAX,ITGB2,PTGS2,TWIST1,NRP2,MEOX2,CCR2,FAP,SRPX2,PIK3CG,SCG2,AHR,CCL2,C3,C3AR1,CCL5,CCL11,C5AR1,GPNMB,MMP2,MMP9,ALOX5,COL8A1,COL8A2,COL15A1,PLXDC1,ANXA1,ADAM12,LEP,LGALS3,THBS2,EGR3,CD36,SERPINE1,GREM1,IL6,CXCL8,CXCR2
GO: Biological Process	GO:0009967	positive regulation of signal transduction				1.16e-16	6.61e-13	4.53e-15	4.18e-14	80	1733	IL10,IL10RA,EREG,INHBA,RASSF2,CD300A,GATA6,CLEC7A,PTPN22,TLR7,HMOX1,LY96,CHI3L1,HPSE,TRIM22,ZEB2,LAPTM5,NOD2,CD84,S100A8,ADORA2B,CCN4,S100A9,S100A12,PTPRC,TRAT1,FCGR2B,PIK3CG,CCL2,FGF7,C3,CCR1,CCL4,CCL5,PLAUR,CCL7,CCL8,CCL11,SRPX,C5AR1,GPNMB,CCL18,CCL20,FGR,MMP9,MMP12,LY86,VAV1,RAC2,COL1A1,DOCK2,MDFIC,PRRX1,SFRP4,GPR18,GPR65,FPR1,CASP1,BIRC3,GPR183,APOE,LEP,AREG,IGF1,CD14,TIMP2,CD28,CD86,CD36,TLR…
GO: Biological Process	GO:0042098	T cell proliferation				1.3e-16	7.39e-13	5.02e-15	4.64e-14	29	239	IL10,VSIG4,PTPN22,ITGAM,ITGAX,ITGB2,LAPTM5,CCR2,CLC,PTPRC,SASH3,PIK3CG,CCL5,GPNMB,RAC2,LILRB4,DOCK2,ANXA1,CR1,LEP,LGALS3,IGF1,CD28,CD86,CRTAM,CD44,TNFRSF1B,IL6,NCKAP1L
GO: Biological Process	GO:0002768	immune response-regulating cell surface receptor signaling pathway				1.44e-16	8.19e-13	5.53e-15	5.1e-14	42	533	PDE4B,CD300A,HLA-DRB4,PTPN22,ITK,LAPTM5,TYROBP,PTPRC,FCER1G,FCGR1B,FCGR2A,TRAT1,FCGR2B,CLEC4A,FCN1,MICB,BTK,LPXN,C3AR1,C5AR1,FGR,CLEC10A,MNDA,VAV1,LILRB4,THEMIS2,LAT2,FPR1,FPR3,LCP2,CR1,LGALS3,CD3G,CD28,TLR2,IGKC,IGLC1,TRBC1,LYN,FYB1,HCK,NCKAP1L
GO: Biological Process	GO:0002700	regulation of production of molecular mediator of immune response				1.54e-16	8.76e-13	5.88e-15	5.42e-14	25	169	IL10,CLEC7A,PTPN22,HMOX1,LAPTM5,NOD2,CCR2,CLC,PTPRC,FCER1G,FCGR2B,SASH3,BTK,CCL20,IL33,LILRB4,CR1,NLRP3,CD28,CD36,TLR2,TLR4,IRAK3,TNFRSF1B,IL6
GO: Biological Process	GO:0002520	immune system development				1.63e-16	9.3e-13	6.2e-15	5.72e-14	64	1185	SLAMF8,IL10,HLA-DMA,INHBA,RASSF2,CLEC5A,TCIRG1,EVI2B,PTPN22,DCSTAMP,ITGA4,ITGAM,ITK,FGL2,CCR2,CCN4,TYROBP,CLC,PTPRC,FCER1G,FCGR2B,SASH3,VNN1,BTK,AHR,CCR1,C3AR1,CCL5,GPR171,CCL20,PLEK,MMP9,VAV1,LILRB4,DOCK2,GPR18,ANXA1,IRF8,DOCK10,SAMHD1,GPR183,CR1,LEP,NLRP3,LGALS3,MFAP5,CD2,CD3G,EGR3,CD28,CD86,LOX,TLR2,TLR4,CRTAM,CD44,TREM2,IRAK3,DUSP10,LYN,IL6,HCLS1,IL7R,NCKAP1L
GO: Biological Process	GO:0042060	wound healing				2.52e-16	1.44e-12	9.51e-15	8.77e-14	44	594	CFH,EREG,GATA6,CLEC7A,HMOX1,HPSE,CCR2,S100A8,CCN4,S100A9,FAP,FCER1G,PIK3CG,CCL2,FGF7,C3,GNA15,PLAUR,PLEK,MMP12,ALOX5,VAV1,COL1A1,COL1A2,COL5A1,COMP,ANXA1,APOE,LCP1,LCP2,PAPSS2,ZFPM2,MMRN1,POSTN,THBD,IGF1,LOX,CD36,TLR4,SERPINE1,CD44,DUSP10,LYN,IL6
GO: Biological Process	GO:1903708	positive regulation of hemopoiesis				2.65e-16	1.51e-12	9.88e-15	9.11e-14	26	190	IL10,HLA-DMA,EVI2B,DCSTAMP,ITGAM,CCR2,TYROBP,PTPRC,SASH3,VNN1,BTK,CCR1,CCL5,LILRB4,ANXA1,CR1,NLRP3,LGALS3,EGR3,CD86,TREM2,DUSP10,IL6,HCLS1,IL7R,NCKAP1L
GO: Biological Process	GO:1902107	positive regulation of leukocyte differentiation				2.65e-16	1.51e-12	9.88e-15	9.11e-14	26	190	IL10,HLA-DMA,EVI2B,DCSTAMP,ITGAM,CCR2,TYROBP,PTPRC,SASH3,VNN1,BTK,CCR1,CCL5,LILRB4,ANXA1,CR1,NLRP3,LGALS3,EGR3,CD86,TREM2,DUSP10,IL6,HCLS1,IL7R,NCKAP1L
GO: Biological Process	GO:0030097	hemopoiesis				3.63e-16	2.07e-12	1.34e-14	1.24e-13	60	1074	SLAMF8,IL10,HLA-DMA,INHBA,RASSF2,CLEC5A,TCIRG1,EVI2B,PTPN22,DCSTAMP,ITGA4,ITGAM,ITK,FGL2,CCR2,CCN4,TYROBP,PTPRC,FCER1G,FCGR2B,SASH3,VNN1,BTK,AHR,CCR1,CCL5,GPR171,CCL20,PLEK,MMP9,VAV1,LILRB4,DOCK2,GPR18,ANXA1,IRF8,DOCK10,GPR183,CR1,LEP,NLRP3,LGALS3,MFAP5,CD2,CD3G,EGR3,CD28,CD86,LOX,TLR2,TLR4,CRTAM,CD44,TREM2,DUSP10,LYN,IL6,HCLS1,IL7R,NCKAP1L
GO: Biological Process	GO:0002831	regulation of response to biotic stimulus		1		6.76e-16	3.85e-12	2.49e-14	2.29e-13	38	455	SLAMF8,EREG,VSIG4,GATA6,PTPN22,LY96,FGL2,NOD2,CD84,TYROBP,FCER1G,FCGR2B,CLEC4A,FCN1,MICB,CCL5,MMP2,FGR,CLEC10A,MMP12,CXCL6,LY86,MNDA,VAV1,BIRC3,SAMHD1,APOE,CR1,LEP,CD36,TLR2,TLR4,CRTAM,TREM2,IRAK3,DUSP10,LYN,HCK
GO: Biological Process	GO:0010647	positive regulation of cell communication				1.02e-15	5.8e-12	3.72e-14	3.43e-13	84	1952	IL10,IL10RA,EREG,INHBA,RASSF2,CD300A,GATA6,CLEC7A,PTPN22,TLR7,HMOX1,LY96,CHI3L1,HPSE,TRIM22,PTGS2,ZEB2,LAPTM5,NOD2,CD84,CCR2,S100A8,ADORA2B,CCN4,S100A9,TYROBP,S100A12,PTPRC,TRAT1,FCGR2B,PIK3CG,CCL2,FGF7,C3,CCR1,CCL4,CCL5,PLAUR,CCL7,CCL8,CCL11,SRPX,C5AR1,GPNMB,CCL18,CCL20,FGR,MMP9,MMP12,LY86,VAV1,RAC2,COL1A1,DOCK2,MDFIC,PRRX1,SFRP4,GPR18,GPR65,FPR1,CASP1,BIRC3,GPR183,APOE,SLC1A3,LEP,AREG,IGF1,CD14…
GO: Biological Process	GO:0002819	regulation of adaptive immune response				1.07e-15	6.1e-12	3.89e-14	3.59e-13	26	201	IL10,HLA-DMA,SAMSN1,ADCY7,NOD2,CCR2,CLC,PTPRC,FCER1G,FCGR2B,SASH3,BTK,C3,CCL20,IL33,LILRB4,ANXA1,CR1,NLRP3,CD28,CD44,CD48,DUSP10,TNFRSF1B,IL6,IL7R
GO: Biological Process	GO:0023056	positive regulation of signaling				1.15e-15	6.53e-12	4.13e-14	3.81e-13	84	1956	IL10,IL10RA,EREG,INHBA,RASSF2,CD300A,GATA6,CLEC7A,PTPN22,TLR7,HMOX1,LY96,CHI3L1,HPSE,TRIM22,PTGS2,ZEB2,LAPTM5,NOD2,CD84,CCR2,S100A8,ADORA2B,CCN4,S100A9,TYROBP,S100A12,PTPRC,TRAT1,FCGR2B,PIK3CG,CCL2,FGF7,C3,CCR1,CCL4,CCL5,PLAUR,CCL7,CCL8,CCL11,SRPX,C5AR1,GPNMB,CCL18,CCL20,FGR,MMP9,MMP12,LY86,VAV1,RAC2,COL1A1,DOCK2,MDFIC,PRRX1,SFRP4,GPR18,GPR65,FPR1,CASP1,BIRC3,GPR183,APOE,SLC1A3,LEP,AREG,IGF1,CD14…
GO: Biological Process	GO:0030217	T cell differentiation		1		1.31e-15	7.46e-12	4.69e-14	4.33e-13	31	302	HLA-DMA,TCIRG1,PTPN22,ITK,FGL2,CCR2,PTPRC,FCER1G,SASH3,VNN1,CCL20,VAV1,LILRB4,DOCK2,GPR18,ANXA1,GPR183,CR1,LEP,NLRP3,CD2,CD3G,EGR3,CD28,CD86,CRTAM,CD44,DUSP10,IL6,IL7R,NCKAP1L
GO: Biological Process	GO:0048534	hematopoietic or lymphoid organ development				2.45e-15	1.4e-11	8.73e-14	8.05e-13	60	1120	SLAMF8,IL10,HLA-DMA,INHBA,RASSF2,CLEC5A,TCIRG1,EVI2B,PTPN22,DCSTAMP,ITGA4,ITGAM,ITK,FGL2,CCR2,CCN4,TYROBP,PTPRC,FCER1G,FCGR2B,SASH3,VNN1,BTK,AHR,CCR1,CCL5,GPR171,CCL20,PLEK,MMP9,VAV1,LILRB4,DOCK2,GPR18,ANXA1,IRF8,DOCK10,GPR183,CR1,LEP,NLRP3,LGALS3,MFAP5,CD2,CD3G,EGR3,CD28,CD86,LOX,TLR2,TLR4,CRTAM,CD44,TREM2,DUSP10,LYN,IL6,HCLS1,IL7R,NCKAP1L
GO: Biological Process	GO:0002718	regulation of cytokine production involved in immune response				3.46e-15	1.97e-11	1.23e-13	1.13e-12	19	97	IL10,CLEC7A,HMOX1,LAPTM5,NOD2,CCR2,CLC,FCER1G,SASH3,BTK,CCL20,LILRB4,NLRP3,CD36,TLR2,TLR4,IRAK3,TNFRSF1B,IL6
GO: Biological Process	GO:0035239	tube morphogenesis				4.26e-15	2.43e-11	1.5e-13	1.38e-12	58	1068	CYBB,IL10,CFH,EREG,SERPINF1,GATA6,HMOX1,CHI3L1,HPSE,ITGAX,ITGB2,PTGS2,ZEB2,TWIST1,NRP2,MEOX2,CCR2,FAP,SRPX2,PIK3CG,SCG2,AHR,CCL2,C3,C3AR1,CCL5,CCL11,C5AR1,GPNMB,MMP2,MMP9,ALOX5,COL8A1,COL8A2,PRRX1,COL15A1,COMP,PLXDC1,ANXA1,APOE,ADAM12,LEP,AREG,LGALS3,ZFPM2,THBS2,IGF1,EGR3,LOX,CD36,SERPINE1,CD44,GREM1,CTSD,IL6,CTSZ,CXCL8,CXCR2
GO: Biological Process	GO:0072359	circulatory system development				4.61e-15	2.63e-11	1.61e-13	1.49e-12	66	1340	CYBB,IL10,CFH,EREG,SERPINF1,GATA6,HMOX1,CHI3L1,ITGA4,HPSE,ITGAX,ITGB2,PTGS2,TWIST1,NRP2,MEOX2,CCR2,CCN4,CFD,FAP,SRPX2,PDLIM3,PIK3CG,SCG2,AHR,CCL2,COL14A1,C3,C3AR1,CCL5,CCL11,C5AR1,GPNMB,MMP2,MMP9,PLN,ALOX5,COL1A1,COL1A2,COL5A1,COL8A1,COL8A2,PRRX1,COL11A1,COL15A1,COMP,PLXDC1,ANXA1,APOE,ADAM12,LEP,LGALS3,ZFPM2,THBS2,IGF1,EGR3,LOX,CD36,VCAN,SERPINE1,GREM1,TNFRSF1B,IL6,CXCL8,ADAP2,CXCR2
GO: Biological Process	GO:0002440	production of molecular mediator of immune response				4.92e-15	2.8e-11	1.71e-13	1.57e-12	32	339	IL10,CLEC7A,TCIRG1,PTPN22,HMOX1,FGL2,LAPTM5,NOD2,CCR2,CLC,PTPRC,FCER1G,FCGR2B,SASH3,BTK,CCL20,IL33,LILRB4,SAMHD1,CR1,NLRP3,CD28,CD86,CD36,TLR2,IGKC,TLR4,TREM1,IRAK3,TNFRSF1B,IL6,IL7R
GO: Biological Process	GO:0032602	chemokine production				7.18e-15	4.09e-11	2.48e-13	2.29e-12	20	115	IL10,CLEC7A,TLR7,HMOX1,TWIST1,NOD2,CD84,S100A8,ADORA2B,S100A9,CCL5,CXCL6,IL33,LILRB4,POSTN,TLR2,TLR4,TREM2,TREM1,IL6
GO: Biological Process	GO:0008284	positive regulation of cell population proliferation				8.13e-15	4.63e-11	2.79e-13	2.57e-12	59	1117	IL10,EREG,GATA6,CLEC7A,TCIRG1,PTPN22,HMOX1,ITGA4,PTAFR,HPSE,ITGAX,PTGS2,PLAC8,FABP4,TWIST1,NRP2,NOD2,CCR2,ADORA2B,CCN4,PTPRC,SASH3,SCG2,CCL2,FGF7,C3AR1,CCL5,CCL11,C5AR1,MMP2,MMP9,MMP12,RAC2,PRRX1,COMP,ANXA1,FOLR2,GPR183,CR1,LEP,AREG,LGALS3,ZFPM2,IGF1,EGR3,CD28,CD86,TLR4,SERPINE1,GREM1,OSMR,LYN,HCK,IL6,CTSZ,HCLS1,IL7R,CXCR2,NCKAP1L
GO: Biological Process	GO:0002688	regulation of leukocyte chemotaxis				9.66e-15	5.5e-11	3.29e-13	3.04e-12	21	132	SLAMF8,NOD2,CCR2,CCL2,CCR1,C3AR1,CCL4,CCL5,CCL7,C5AR1,RAC2,SELL,PLA2G7,GPR18,SERPINE1,GREM1,LYN,IL6,CXCL8,CXCR2,NCKAP1L
GO: Biological Process	GO:0032635	interleukin-6 production				1.1e-14	6.25e-11	3.72e-13	3.43e-12	25	202	IL10,EREG,CLEC7A,PTPN22,TLR7,PTAFR,TWIST1,LAPTM5,NOD2,CD84,IFIH1,ADORA2B,TYROBP,FCER1G,IL33,LILRB4,LEP,CD36,TLR1,TLR2,TLR4,TREM2,IRAK3,IL6,NCKAP1L
GO: Biological Process	GO:0051251	positive regulation of lymphocyte activation				1.11e-14	6.32e-11	3.72e-13	3.43e-12	34	396	IL10,HLA-DMA,CLEC7A,PTPN22,NOD2,CCR2,TYROBP,PTPRC,SASH3,VNN1,BTK,CCL2,CCL5,VAV1,LILRB4,ANXA1,MAP3K8,GPR183,CR1,LEP,NLRP3,IGF1,EGR3,CD28,CD86,IGKC,TLR4,IGLC1,DUSP10,TRBC1,LYN,IL6,IL7R,NCKAP1L
GO: Biological Process	GO:0070664	negative regulation of leukocyte proliferation				1.11e-14	6.32e-11	3.72e-13	3.43e-12	19	103	IL10,CD300A,VSIG4,LAPTM5,TYROBP,FCGR2B,BTK,CCL8,GPNMB,MNDA,IL33,LILRB4,LST1,CR1,CD86,CRTAM,CD44,GREM1,LYN
GO: Biological Process	GO:0002460	adaptive immune response based on somatic recombination of immune receptors built from immunoglobulin superfamily domains				1.25e-14	7.13e-11	4.17e-13	3.85e-12	35	422	IL10,CFH,HLA-DMA,TCIRG1,FGL2,NOD2,CCR2,CLC,PTPRC,FCER1G,FCGR2B,SASH3,BTK,C1QA,C1QB,C1R,C1S,C3,C3AR1,CCL20,IL33,LILRB4,ANXA1,CR1,NLRP3,CD28,GZMB,IGKC,TLR4,CRTAM,IGLC1,TNFRSF1B,TRBC1,IL6,IL7R
GO: Biological Process	GO:0002367	cytokine production involved in immune response				1.42e-14	8.11e-11	4.71e-13	4.35e-12	20	119	IL10,CLEC7A,HMOX1,LAPTM5,NOD2,CCR2,CLC,FCER1G,SASH3,BTK,CCL20,LILRB4,NLRP3,CD36,TLR2,TLR4,TREM1,IRAK3,TNFRSF1B,IL6
GO: Biological Process	GO:0051094	positive regulation of developmental process				1.97e-14	1.12e-10	6.48e-13	5.98e-12	70	1525	CYBB,IL10,HLA-DMA,INHBA,SERPINF1,GATA6,CLEC7A,EVI2B,HMOX1,CHI3L1,DCSTAMP,ITGAM,HPSE,ITGAX,ITGB2,PTGS2,ZEB2,TWIST1,CCR2,CCN4,TYROBP,SRPX2,PTPRC,SASH3,VNN1,BTK,CXCL9,C3,CCR1,C3AR1,CCL5,CCL11,C5AR1,MMP9,ALOX5,IL33,COL1A1,LILRB4,SFRP4,ANXA1,APOE,CR1,ADAM12,LEP,NLRP3,LGALS3,ZFPM2,MSR1,THBS2,IGF1,TIMP2,EGR3,PLXNC1,CD28,CD86,CD36,TLR2,SERPINE1,TREM2,CD53,DUSP10,GREM1,TNFRSF1B,LYN,IL6,HCLS1,IL7R,CXCL8,CX…
GO: Biological Process	GO:0030198	extracellular matrix organization				2.35e-14	1.34e-10	7.71e-13	7.11e-12	35	431	ITGA4,ITGAM,ITGAX,ITGB2,FAP,COL14A1,MMP1,MMP2,MMP9,MMP12,COL1A1,COL1A2,COL5A1,COL8A1,COL8A2,COL10A1,COL11A1,COL15A1,COL16A1,COMP,LCP1,ADAM12,LGALS3,POSTN,MFAP5,TIMP2,LOX,VCAN,SERPINE1,CD44,GREM1,LUM,TNFRSF1B,CTSS,IL6
GO: Biological Process	GO:0032675	regulation of interleukin-6 production				2.39e-14	1.36e-10	7.78e-13	7.18e-12	24	190	IL10,EREG,CLEC7A,PTPN22,TLR7,PTAFR,TWIST1,LAPTM5,NOD2,CD84,IFIH1,ADORA2B,TYROBP,FCER1G,IL33,LILRB4,CD36,TLR1,TLR2,TLR4,TREM2,IRAK3,IL6,NCKAP1L
GO: Biological Process	GO:0002449	lymphocyte mediated immunity				2.48e-14	1.41e-10	8.02e-13	7.4e-12	34	407	IL10,CFH,HLA-DMA,TCIRG1,FGL2,NOD2,CCR2,CLC,PTPRC,FCER1G,FCGR2B,SASH3,BTK,C1QA,C1QB,C1R,C1S,C3,CCL20,VAV1,LILRB4,CR1,LEP,NLRP3,CD28,GZMB,IGKC,CRTAM,IGLC1,TNFRSF1B,SLAMF7,TRBC1,IL6,IL7R
GO: Biological Process	GO:0043062	extracellular structure organization				2.52e-14	1.44e-10	8.12e-13	7.49e-12	35	432	ITGA4,ITGAM,ITGAX,ITGB2,FAP,COL14A1,MMP1,MMP2,MMP9,MMP12,COL1A1,COL1A2,COL5A1,COL8A1,COL8A2,COL10A1,COL11A1,COL15A1,COL16A1,COMP,LCP1,ADAM12,LGALS3,POSTN,MFAP5,TIMP2,LOX,VCAN,SERPINE1,CD44,GREM1,LUM,TNFRSF1B,CTSS,IL6
GO: Biological Process	GO:0042742	defense response to bacterium				2.72e-14	1.55e-10	8.69e-13	8.02e-12	33	384	SLAMF8,IL10,ACP5,GBP2,PLAC8,NOD2,S100A8,S100A9,S100A12,FCER1G,C5AR1,CCL20,FGR,CXCL6,IRF8,PPBP,NLRP3,RNASE2,RNASE6,CD36,JCHAIN,TLR2,IGKC,TLR4,SERPINE1,TREM2,TREM1,IGLC1,TRBC1,LYZ,HCK,IL6,IL7R
GO: Biological Process	GO:0050777	negative regulation of immune response				2.76e-14	1.57e-10	8.76e-13	8.09e-12	23	173	SLAMF8,IL10,CD300A,VSIG4,HMOX1,SAMSN1,FGL2,NOD2,CD84,CCR2,PTPRC,FCGR2B,MMP12,IL33,LILRB4,ANXA1,SAMHD1,CR1,LGALS3,IRAK3,DUSP10,LYN,IL7R
GO: Biological Process	GO:0010941	regulation of cell death				2.89e-14	1.64e-10	9.11e-13	8.41e-12	81	1952	IL10,INHBA,RASSF2,STK17B,CLEC5A,SERPINF1,GATA6,CLEC7A,EVI2B,NCF2,BCL2A1,HMOX1,ITGA4,ITGAM,ITGB2,PTGS2,PLAC8,TWIST1,LAPTM5,NOD2,S100A8,CCN4,S100A9,TYROBP,FAP,PTPRC,FCER1G,FCGR2B,VNN1,PIK3CG,SCG2,BTK,KCNMA1,AHR,C1QA,CCL2,CCL5,PLAUR,SRPX,C5AR1,GPNMB,MMP2,MMP9,MNDA,VAV1,SELL,SFRP4,COMP,ANXA1,NR4A2,CASP1,BIRC3,APOE,LEP,LGALS3,ZFPM2,CD3G,IGF1,EGR3,CD28,LOX,CD36,GZMA,TLR4,SERPINE1,CD44,TREM2,LAMP3,IRAK3…
GO: Biological Process	GO:0045229	external encapsulating structure organization				2.9e-14	1.65e-10	9.11e-13	8.41e-12	35	434	ITGA4,ITGAM,ITGAX,ITGB2,FAP,COL14A1,MMP1,MMP2,MMP9,MMP12,COL1A1,COL1A2,COL5A1,COL8A1,COL8A2,COL10A1,COL11A1,COL15A1,COL16A1,COMP,LCP1,ADAM12,LGALS3,POSTN,MFAP5,TIMP2,LOX,VCAN,SERPINE1,CD44,GREM1,LUM,TNFRSF1B,CTSS,IL6
GO: Biological Process	GO:0000165	MAPK cascade				3.26e-14	1.86e-10	1.02e-12	9.42e-12	55	1020	EREG,RASSF2,CD300A,CLEC7A,PTPN22,CHI3L1,ZEB2,LAPTM5,NOD2,CD84,ADORA2B,S100A12,PTPRC,FCGR2B,PIK3CG,SCG2,RASGRP3,CCL2,FGF7,C3,CCR1,CCL4,CCL5,CCL7,CCR5,CCL8,CCL11,C5AR1,GPNMB,CCL18,CCL20,LILRB4,MDFIC,SFRP4,MAP3K8,FPR1,GPR183,APOE,LEP,AREG,IGF1,CSF2RA,CSF2RB,TIMP2,CD36,TLR2,TLR4,CD44,TREM2,IRAK3,DUSP10,GREM1,LYN,IL1RN,IL6
GO: Biological Process	GO:0006968	cellular defense response				3.59e-14	2.04e-10	1.12e-12	1.03e-11	15	58	CLEC5A,TCIRG1,NCF2,LY96,ITK,CCR2,ADORA2B,TYROBP,TRAT1,CXCL9,CCR5,C5AR1,MNDA,IL33,CXCR2
GO: Biological Process	GO:0045619	regulation of lymphocyte differentiation				3.79e-14	2.16e-10	1.17e-12	1.08e-11	25	213	SLAMF8,IL10,HLA-DMA,INHBA,FGL2,CCR2,PTPRC,SASH3,VNN1,BTK,CCL20,LILRB4,ANXA1,CR1,NLRP3,CD2,EGR3,CD28,CD86,CRTAM,CD44,DUSP10,IL6,IL7R,NCKAP1L
GO: Biological Process	GO:0051250	negative regulation of lymphocyte activation				4.01e-14	2.29e-10	1.24e-12	1.14e-11	23	176	IL10,INHBA,CD300A,VSIG4,PTPN22,SAMSN1,FGL2,LAPTM5,TYROBP,FCGR2B,BTK,GPNMB,FGR,MNDA,LILRB4,LST1,ANXA1,CR1,LGALS3,CD86,CRTAM,CD44,LYN
GO: Biological Process	GO:0071396	cellular response to lipid				4.33e-14	2.46e-10	1.32e-12	1.22e-11	42	628	IL10,CFH,PDE4B,INHBA,CES1,SERPINF1,PTPN22,LY96,PTAFR,NOD2,CD84,CXCL9,AHR,CCL2,CCL5,CCR5,MMP2,CXCL6,LY86,COL1A1,MRC1,ANXA1,CASP1,IRF8,PPBP,CXCL2,CXCL3,LEP,NLRP3,IGF1,CD14,CD86,CD36,TLR2,TLR4,SERPINE1,TREM2,TNFRSF1B,LYN,HCK,IL6,CXCL8
GO: Biological Process	GO:0042129	regulation of T cell proliferation				4.82e-14	2.75e-10	1.47e-12	1.36e-11	24	196	IL10,VSIG4,PTPN22,LAPTM5,CCR2,CLC,PTPRC,SASH3,CCL5,GPNMB,RAC2,LILRB4,ANXA1,CR1,LEP,LGALS3,IGF1,CD28,CD86,CRTAM,CD44,TNFRSF1B,IL6,NCKAP1L
GO: Biological Process	GO:0035295	tube development				6.46e-14	3.68e-10	1.96e-12	1.8e-11	63	1310	CYBB,IL10,CFH,EREG,SERPINF1,GATA6,HMOX1,CHI3L1,HPSE,ITGAX,ITGB2,PTGS2,ZEB2,TWIST1,NRP2,MEOX2,CCR2,FAP,SRPX2,PIK3CG,SCG2,AHR,CCL2,FGF7,C3,C3AR1,CCL5,CCL11,C5AR1,GPNMB,MMP2,HSD11B1,MMP9,MMP12,ALOX5,COL8A1,COL8A2,PRRX1,COL15A1,COMP,PLXDC1,ANXA1,APOE,ADAM12,LEP,AREG,LGALS3,ZFPM2,THBS2,LIPA,IGF1,EGR3,LOX,CD36,VCAN,SERPINE1,CD44,GREM1,CTSD,IL6,CTSZ,CXCL8,CXCR2
GO: Biological Process	GO:0045088	regulation of innate immune response				9.85e-14	5.61e-10	2.97e-12	2.74e-11	30	330	SLAMF8,EREG,VSIG4,PTPN22,NOD2,TYROBP,FCER1G,FCGR2B,CLEC4A,FCN1,CCL5,MMP2,FGR,CLEC10A,MMP12,MNDA,VAV1,BIRC3,SAMHD1,APOE,CR1,LEP,TLR2,TLR4,CRTAM,TREM2,IRAK3,DUSP10,LYN,HCK
GO: Biological Process	GO:1901701	cellular response to oxygen-containing compound				1.28e-13	7.28e-10	3.83e-12	3.54e-11	63	1330	CYBB,IL10,CFH,PDE4B,MYO5A,INHBA,CES1,SERPINF1,CLEC7A,TCIRG1,PTPN22,LY96,ITGA4,PTAFR,PTGDR,ADCY7,NOD2,CD84,PTPRE,FCGR2B,PIK3CG,BTK,CXCL9,AHR,HRH1,CCL2,CCL5,GNA15,CCL7,CCR5,MMP2,MMP9,CXCL6,LY86,COL1A1,COL1A2,MRC1,COL16A1,ANXA1,FOLR2,NR4A2,CASP1,IRF8,PPBP,CXCL2,CXCL3,SLC1A3,AQP9,LEP,NLRP3,IGF1,CD14,CD86,CD36,TLR2,TLR4,SERPINE1,TREM2,TNFRSF1B,LYN,HCK,IL6,CXCL8
GO: Biological Process	GO:0045785	positive regulation of cell adhesion				2.44e-13	1.39e-09	7.28e-12	6.71e-11	36	493	IL10,HLA-DMA,PTPN22,ITGA4,PTAFR,ITGB2,NOD2,CCR2,PTPRC,SASH3,VNN1,CCL2,CCL5,PLAUR,ALOX5,VAV1,LILRB4,SELE,COL8A1,COL16A1,ANXA1,MAP3K8,CR1,LEP,NLRP3,IGF1,EGR3,CD28,CD86,CD36,CD44,DUSP10,LYN,IL6,IL7R,NCKAP1L
GO: Biological Process	GO:0050864	regulation of B cell activation				3.08e-13	1.76e-09	9.14e-12	8.43e-11	24	213	SLAMF8,IL10,INHBA,CD300A,SAMSN1,LAPTM5,NOD2,TYROBP,PTPRC,FCGR2B,SASH3,BTK,AHR,MNDA,GPR183,CR1,CD28,IGKC,TLR4,IGLC1,TRBC1,LYN,IL6,NCKAP1L
GO: Biological Process	GO:0043300	regulation of leukocyte degranulation				3.3e-13	1.88e-09	9.73e-12	8.98e-11	14	55	CD300A,HMOX1,PTAFR,ADGRE2,ITGAM,ITGB2,CD84,CCR2,ADORA2B,FCER1G,FCGR2B,FGR,RAC2,LYN
GO: Biological Process	GO:0048646	anatomical structure formation involved in morphogenesis				3.34e-13	1.9e-09	9.82e-12	9.06e-11	64	1395	CYBB,IL10,CFH,EREG,HLA-DMA,INHBA,SERPINF1,GATA6,TCIRG1,HMOX1,CHI3L1,DCSTAMP,ITGA4,HPSE,ITGAX,ITGB2,PTGS2,ZEB2,TWIST1,NRP2,MEOX2,CCR2,TYROBP,FAP,SRPX2,PIK3CG,SCG2,CXCL9,AHR,CCL2,C3,C3AR1,CCL5,CCL11,C5AR1,GPNMB,MMP2,MMP9,ALOX5,COL1A1,COL5A1,COL8A1,COL8A2,COL11A1,COL15A1,PLXDC1,ANXA1,ADAM12,LEP,LGALS3,ZFPM2,THBS2,EGR3,CD36,TLR2,SERPINE1,CD44,TREM2,CD53,GREM1,IL1RN,IL6,CXCL8,CXCR2
GO: Biological Process	GO:0002526	acute inflammatory response				5.82e-13	3.32e-09	1.7e-11	1.57e-10	19	127	PTGS2,CD163,S100A8,FCER1G,FCGR2B,VNN1,PIK3CG,BTK,C3,CCL5,ALOX5,ALOX5AP,NLRP3,AOC3,TREM1,OSMR,IL1RN,IL6,CXCR2
GO: Biological Process	GO:0001818	negative regulation of cytokine production				5.96e-13	3.39e-09	1.72e-11	1.59e-10	32	403	IL10,INHBA,ACP5,VSIG4,GATA6,PTPN22,HMOX1,ADCY7,TWIST1,LAPTM5,NOD2,CD84,IFIH1,TYROBP,PTPRC,FCGR2B,CLEC4A,BTK,GPNMB,IL33,LILRB4,GPR18,ANXA1,CR1,NLRP3,IGF1,TLR2,TLR4,TREM2,IRAK3,IL6,NCKAP1L
GO: Biological Process	GO:0032609	interferon-gamma production				5.96e-13	3.4e-09	1.72e-11	1.59e-10	20	144	IL10,PDE4B,INHBA,CLEC7A,TCIRG1,PTPN22,TLR7,ITK,LAPTM5,NOD2,CCR2,SASH3,IL33,LILRB4,IRF8,CR1,CD2,CD14,TLR4,CRTAM
GO: Biological Process	GO:0050870	positive regulation of T cell activation				6.42e-13	3.66e-09	1.85e-11	1.71e-10	25	241	HLA-DMA,PTPN22,NOD2,CCR2,PTPRC,SASH3,VNN1,CCL2,CCL5,VAV1,LILRB4,ANXA1,MAP3K8,CR1,LEP,NLRP3,IGF1,EGR3,CD28,CD86,DUSP10,LYN,IL6,IL7R,NCKAP1L
GO: Biological Process	GO:0002698	negative regulation of immune effector process				6.81e-13	3.88e-09	1.95e-11	1.8e-10	20	145	SLAMF8,IL10,CD300A,VSIG4,HMOX1,FGL2,NOD2,CD84,CCR2,PTPRC,FCGR2B,MICB,IL33,LILRB4,ANXA1,CR1,LGALS3,IRAK3,DUSP10,IL7R
GO: Biological Process	GO:0042113	B cell activation				8.83e-13	5.03e-09	2.52e-11	2.32e-10	30	359	SLAMF8,IL10,INHBA,CD300A,TCIRG1,ITGA4,SAMSN1,LAPTM5,NOD2,TYROBP,PTPRC,FCGR2B,SASH3,BTK,AHR,MNDA,LAT2,DOCK10,GPR183,CR1,CD28,CD86,IGKC,TLR4,IGLC1,TRBC1,LYN,IL6,IL7R,NCKAP1L
GO: Biological Process	GO:0043408	regulation of MAPK cascade				9.53e-13	5.43e-09	2.7e-11	2.49e-10	46	812	RASSF2,CD300A,CLEC7A,PTPN22,CHI3L1,ZEB2,LAPTM5,NOD2,CD84,ADORA2B,S100A12,PTPRC,FCGR2B,PIK3CG,CCL2,C3,CCR1,CCL4,CCL5,CCL7,CCL8,CCL11,C5AR1,GPNMB,CCL18,CCL20,LILRB4,MDFIC,SFRP4,FPR1,GPR183,APOE,LEP,IGF1,TIMP2,CD36,TLR2,TLR4,CD44,TREM2,IRAK3,DUSP10,GREM1,LYN,IL1RN,IL6
GO: Biological Process	GO:0043410	positive regulation of MAPK cascade				9.67e-13	5.51e-09	2.73e-11	2.52e-10	39	601	RASSF2,CLEC7A,PTPN22,CHI3L1,ZEB2,LAPTM5,NOD2,CD84,ADORA2B,S100A12,PTPRC,FCGR2B,PIK3CG,CCL2,C3,CCR1,CCL4,CCL5,CCL7,CCL8,CCL11,C5AR1,GPNMB,CCL18,CCL20,MDFIC,FPR1,GPR183,APOE,LEP,IGF1,TIMP2,CD36,TLR2,TLR4,CD44,TREM2,IL1RN,IL6
GO: Biological Process	GO:0045595	regulation of cell differentiation				1.38e-12	7.85e-09	3.87e-11	3.57e-10	75	1859	SLAMF8,IL10,EREG,HLA-DMA,INHBA,RASSF2,SERPINF1,GATA6,CLEC7A,TCIRG1,EVI2B,DCSTAMP,ITGAM,PTGS2,ZEB2,FGL2,TWIST1,CCR2,CCN4,TYROBP,PTPRC,FCGR2B,SASH3,VNN1,BTK,CXCL9,AHR,CCR1,CCL5,CCL11,GPR171,CCL20,MMP9,ALOX5,IL33,COL1A1,LILRB4,COL5A1,SFRP4,ANXA1,APOE,RUNX1T1,CR1,LEP,NLRP3,AREG,LGALS3,ZFPM2,MSR1,POSTN,CD2,ABCG1,IGF1,TIMP2,EGR3,PLXNC1,CD28,CD86,LOX,CD36,TLR2,TLR4,CRTAM,SERPINE1,CD44,TREM2,CD53,DUSP10,…
GO: Biological Process	GO:0043303	mast cell degranulation				1.55e-12	8.85e-09	4.34e-11	4e-10	14	61	CD300A,HMOX1,ADGRE2,PTGDR,CD84,ADORA2B,FCER1G,PIK3CG,BTK,FGR,RAC2,LAT2,MILR1,LYN
GO: Biological Process	GO:0072677	eosinophil migration				1.78e-12	1.02e-08	4.95e-11	4.57e-10	10	23	CD300A,SCG2,HRH1,CCL2,CCL4,CCL5,CCL7,CCL8,CCL11,LGALS3
GO: Biological Process	GO:0043085	positive regulation of catalytic activity				1.88e-12	1.07e-08	5.19e-11	4.79e-10	68	1600	EREG,RASSF2,CD300A,CLEC7A,CHI3L1,PTAFR,ITGAM,ITGB2,ZEB2,ADCY7,ITK,LAPTM5,NOD2,S100A8,ADORA2B,S100A9,S100A12,PTPRC,PIK3CG,RASGRP3,HRH1,GM2A,CCL2,C3AR1,CCL4,CCL5,GNA15,CCL7,CCL8,CCL11,C5AR1,GPNMB,CCL18,CCL20,FGR,PLEK,ALOX5,VAV1,SELE,DOCK2,MDFIC,GPR18,GPR65,MAP3K8,FPR1,FPR3,NR4A2,CASP1,DOCK10,APOE,LCP2,CR1,RGS1,LEP,NLRP3,AREG,IGF1,TIMP2,CD86,TLR1,TLR4,GREM1,LYN,CTSD,IL1RN,ADAP2,CXCR2,NCKAP1L
GO: Biological Process	GO:0002279	mast cell activation involved in immune response				1.98e-12	1.13e-08	5.44e-11	5.02e-10	14	62	CD300A,HMOX1,ADGRE2,PTGDR,CD84,ADORA2B,FCER1G,PIK3CG,BTK,FGR,RAC2,LAT2,MILR1,LYN
GO: Biological Process	GO:0002448	mast cell mediated immunity				2.5e-12	1.43e-08	6.85e-11	6.32e-10	14	63	CD300A,HMOX1,ADGRE2,PTGDR,CD84,ADORA2B,FCER1G,PIK3CG,BTK,FGR,RAC2,LAT2,MILR1,LYN
GO: Biological Process	GO:0051336	regulation of hydrolase activity				2.52e-12	1.44e-08	6.88e-11	6.35e-10	64	1460	CD300A,SERPINF1,CLEC7A,PTAFR,PTGS2,ITK,LAPTM5,S100A8,S100A9,PTPRC,RASGRP3,AHR,HRH1,GM2A,CCL2,C3,C3AR1,CCL4,CCL5,GNA15,PLAUR,CCL7,CCL8,CCL11,C5AR1,CCL18,CCL20,PLEK,MMP9,PLN,VAV1,SELE,DOCK2,GPR18,GPR65,RARRES1,ANXA1,FPR1,FPR3,CASP1,DOCK10,BIRC3,APOC1,CR1,RGS1,NLRP3,LGALS3,IGF1,TIMP2,PLXNC1,CD86,VCAN,GZMA,SERPINE1,CD44,LAMP3,CSTA,LYN,CTSD,IL6,ADAP2,CXCR2,NCKAP1L,PHACTR1
GO: Biological Process	GO:0045580	regulation of T cell differentiation				2.85e-12	1.62e-08	7.72e-11	7.12e-10	21	175	HLA-DMA,FGL2,CCR2,PTPRC,SASH3,VNN1,CCL20,LILRB4,ANXA1,CR1,NLRP3,CD2,EGR3,CD28,CD86,CRTAM,CD44,DUSP10,IL6,IL7R,NCKAP1L
GO: Biological Process	GO:0002523	leukocyte migration involved in inflammatory response				3.01e-12	1.71e-08	8.12e-11	7.49e-10	10	24	SLAMF8,ITGAM,ITGB2,S100A8,S100A9,CCL2,ALOX5,SELE,NLRP3,AOC3
GO: Biological Process	GO:0032637	interleukin-8 production				3.09e-12	1.76e-08	8.25e-11	7.61e-10	17	106	IL10,CLEC7A,PTPN22,TLR7,CHI3L1,NOD2,PTPRC,FCN1,ANXA1,LEP,CD2,CD14,TLR1,TLR2,TLR4,SERPINE1,IL6
GO: Biological Process	GO:0032642	regulation of chemokine production				3.09e-12	1.76e-08	8.25e-11	7.61e-10	17	106	IL10,CLEC7A,TLR7,HMOX1,TWIST1,NOD2,CD84,ADORA2B,CCL5,CXCL6,IL33,LILRB4,POSTN,TLR2,TLR4,TREM2,IL6
GO: Biological Process	GO:0043067	regulation of programmed cell death				3.55e-12	2.02e-08	9.46e-11	8.72e-10	72	1777	IL10,INHBA,RASSF2,STK17B,CLEC5A,GATA6,CLEC7A,EVI2B,NCF2,BCL2A1,HMOX1,ITGA4,ITGAM,PTGS2,PLAC8,TWIST1,LAPTM5,NOD2,S100A8,S100A9,TYROBP,FAP,PTPRC,FCER1G,VNN1,PIK3CG,SCG2,BTK,KCNMA1,CCL2,CCL5,PLAUR,SRPX,C5AR1,MMP2,MMP9,MNDA,VAV1,SELL,SFRP4,COMP,ANXA1,NR4A2,CASP1,BIRC3,APOE,LEP,LGALS3,CD3G,IGF1,EGR3,CD28,LOX,GZMA,TLR4,SERPINE1,CD44,TREM2,LAMP3,IRAK3,GREM1,TNFRSF1B,LYN,CTSD,IL1RN,HCK,IL6,CTSZ,HCLS1,IL7…
GO: Biological Process	GO:0032755	positive regulation of interleukin-6 production				3.61e-12	2.06e-08	9.52e-11	8.79e-10	17	107	EREG,CLEC7A,TLR7,PTAFR,TWIST1,LAPTM5,NOD2,IFIH1,ADORA2B,TYROBP,FCER1G,IL33,CD36,TLR1,TLR2,TLR4,IL6
GO: Biological Process	GO:0002532	production of molecular mediator involved in inflammatory response				3.61e-12	2.06e-08	9.52e-11	8.79e-10	17	107	SLAMF8,CD300A,CLEC7A,ADCY7,NOD2,FCER1G,BTK,ALOX5,ALOX5AP,LILRB4,LEP,CD36,TLR4,SERPINE1,DUSP10,LYN,IL6
GO: Biological Process	GO:0031663	lipopolysaccharide-mediated signaling pathway				3.96e-12	2.25e-08	1.04e-10	9.58e-10	14	65	PTPN22,LY96,PTAFR,CD84,CCL2,CCL5,LY86,CD14,CD36,TLR2,TLR4,TREM2,LYN,HCK
GO: Biological Process	GO:0006897	endocytosis				6.26e-12	3.57e-08	1.64e-10	1.51e-09	44	793	IL10RA,CD300A,CLEC7A,HMOX1,ITGA4,ITGAM,ITGB2,CD163,FCER1G,FCGR1B,TRAT1,FCGR2B,FCN1,PIK3CG,C3,BIN2,CLEC10A,RAC2,LILRB4,SELE,DOCK2,MRC1,SFRP4,APOC1,APOE,OLR1,LGALS3,MSR1,LIPA,MCTP1,CD14,CD36,JCHAIN,IGKC,SERPINE1,TREM2,IGLC1,GREM1,TRBC1,LY75,SOAT1,CXCL8,CXCR2,NCKAP1L
GO: Biological Process	GO:0001774	microglial cell activation				6.58e-12	3.75e-08	1.71e-10	1.58e-09	13	55	TLR7,ITGAM,ITGB2,TYROBP,PTPRC,C1QA,C5AR1,IL33,TLR1,TLR2,TLR4,TREM2,IL6
GO: Biological Process	GO:0046631	alpha-beta T cell activation				6.8e-12	3.87e-08	1.76e-10	1.62e-09	21	183	CD300A,TCIRG1,PTPN22,ITK,CCR2,PTPRC,CLEC4A,SASH3,CCL20,LILRB4,DOCK2,GPR18,ANXA1,GPR183,NLRP3,CD28,CD86,CRTAM,CD44,IL6,NCKAP1L
GO: Biological Process	GO:0032649	regulation of interferon-gamma production				7.05e-12	4.01e-08	1.82e-10	1.68e-09	18	128	IL10,PDE4B,INHBA,CLEC7A,PTPN22,TLR7,LAPTM5,NOD2,CCR2,SASH3,IL33,LILRB4,IRF8,CR1,CD2,CD14,TLR4,CRTAM
GO: Biological Process	GO:0050672	negative regulation of lymphocyte proliferation				7.37e-12	4.2e-08	1.89e-10	1.75e-09	16	96	IL10,CD300A,VSIG4,LAPTM5,TYROBP,FCGR2B,BTK,GPNMB,MNDA,LILRB4,LST1,CR1,CD86,CRTAM,CD44,LYN
GO: Biological Process	GO:0002822	regulation of adaptive immune response based on somatic recombination of immune receptors built from immunoglobulin superfamily domains				7.56e-12	4.3e-08	1.92e-10	1.77e-09	21	184	IL10,HLA-DMA,NOD2,CCR2,CLC,PTPRC,FCER1G,FCGR2B,SASH3,BTK,C3,CCL20,IL33,LILRB4,ANXA1,CR1,NLRP3,CD28,TNFRSF1B,IL6,IL7R
GO: Biological Process	GO:0002706	regulation of lymphocyte mediated immunity				7.56e-12	4.3e-08	1.92e-10	1.77e-09	21	184	IL10,NOD2,CCR2,CLC,PTPRC,FCER1G,FCGR2B,SASH3,BTK,C3,CCL20,VAV1,LILRB4,CR1,LEP,NLRP3,CD28,CRTAM,TNFRSF1B,IL6,IL7R
GO: Biological Process	GO:0050920	regulation of chemotaxis				7.71e-12	4.39e-08	1.95e-10	1.8e-09	24	247	SLAMF8,NOD2,CCR2,SCG2,CCL2,CCR1,C3AR1,CCL4,CCL5,CCL7,C5AR1,RAC2,SELL,PLA2G7,GPR18,GPR183,SERPINE1,TREM2,GREM1,LYN,IL6,CXCL8,CXCR2,NCKAP1L
GO: Biological Process	GO:0032102	negative regulation of response to external stimulus				7.93e-12	4.52e-08	2e-10	1.84e-09	32	444	SLAMF8,IL10,ACP5,SERPINF1,VSIG4,FGL2,NOD2,FAP,PTPRC,FCGR2B,MICB,CCL2,PLAUR,MMP12,ALOX5,GPR18,NT5E,AOAH,SAMHD1,APOE,CR1,LEP,NLRP3,THBD,IGF1,SERPINE1,CD44,IRAK3,DUSP10,GREM1,TNFAIP6,TNFRSF1B
GO: Biological Process	GO:0032945	negative regulation of mononuclear cell proliferation				8.69e-12	4.95e-08	2.18e-10	2.01e-09	16	97	IL10,CD300A,VSIG4,LAPTM5,TYROBP,FCGR2B,BTK,GPNMB,MNDA,LILRB4,LST1,CR1,CD86,CRTAM,CD44,LYN
GO: Biological Process	GO:0002224	toll-like receptor signaling pathway				8.81e-12	5.02e-08	2.2e-10	2.03e-09	20	166	CD300A,PTPN22,TLR7,LY96,ITGAM,ITGB2,NOD2,S100A8,S100A9,BTK,BIRC3,CD14,CD86,CD36,TLR1,TLR2,TLR4,IRAK3,LYN,CTSS
GO: Biological Process	GO:0001776	leukocyte homeostasis				8.97e-12	5.11e-08	2.23e-10	2.06e-09	17	113	CFH,PDE4B,TCIRG1,ITGAM,CCR2,FCER1G,AHR,CCL2,CXCL6,ANXA1,DOCK10,GPR183,CD44,LYN,IL6,CXCR2,NCKAP1L
GO: Biological Process	GO:0048245	eosinophil chemotaxis				9.04e-12	5.15e-08	2.24e-10	2.07e-09	9	19	SCG2,HRH1,CCL2,CCL4,CCL5,CCL7,CCL8,CCL11,LGALS3
GO: Biological Process	GO:0010324	membrane invagination				9.48e-12	5.4e-08	2.34e-10	2.16e-09	44	803	IL10RA,CD300A,CLEC7A,HMOX1,ITGA4,ITGAM,ITGB2,CD163,FCER1G,FCGR1B,TRAT1,FCGR2B,FCN1,PIK3CG,C3,BIN2,CLEC10A,RAC2,LILRB4,SELE,DOCK2,MRC1,SFRP4,APOC1,APOE,OLR1,LGALS3,MSR1,LIPA,MCTP1,CD14,CD36,JCHAIN,IGKC,SERPINE1,TREM2,IGLC1,GREM1,TRBC1,LY75,SOAT1,CXCL8,CXCR2,NCKAP1L
GO: Biological Process	GO:0042981	regulation of apoptotic process				9.54e-12	5.43e-08	2.34e-10	2.16e-09	70	1736	IL10,INHBA,RASSF2,STK17B,CLEC5A,GATA6,EVI2B,NCF2,BCL2A1,HMOX1,ITGA4,ITGAM,PTGS2,PLAC8,TWIST1,NOD2,S100A8,S100A9,TYROBP,FAP,PTPRC,FCER1G,VNN1,PIK3CG,SCG2,BTK,KCNMA1,CCL2,CCL5,PLAUR,SRPX,C5AR1,MMP2,MMP9,MNDA,VAV1,SELL,SFRP4,COMP,ANXA1,NR4A2,CASP1,BIRC3,APOE,LEP,LGALS3,CD3G,IGF1,EGR3,CD28,LOX,GZMA,TLR4,SERPINE1,CD44,TREM2,LAMP3,IRAK3,GREM1,TNFRSF1B,LYN,CTSD,IL1RN,HCK,IL6,CTSZ,HCLS1,IL7R,CXCR2,NCKAP1L
GO: Biological Process	GO:0070374	positive regulation of ERK1 and ERK2 cascade				1.09e-11	6.18e-08	2.65e-10	2.45e-09	24	251	PTPN22,CHI3L1,NOD2,PTPRC,CCL2,C3,CCR1,CCL4,CCL5,CCL7,CCL8,CCL11,C5AR1,GPNMB,CCL18,CCL20,GPR183,APOE,CD36,TLR2,TLR4,CD44,TREM2,IL6
GO: Biological Process	GO:0019932	second-messenger-mediated signaling				1.24e-11	7.05e-08	3.01e-10	2.78e-09	38	623	PDE4B,ADGRE2,ADCY7,CCR2,ADORA2B,PTPRC,TRAT1,CLIC2,BTK,CXCL9,AHR,HRH1,CCL2,CCR1,C3AR1,CCL4,GNA15,CCR5,C5AR1,CCL20,PLEK,PLN,SELE,GPR18,GPR65,LAT2,ANXA1,FPR1,FPR3,CCRL2,APOE,RGS1,IGF1,MCTP1,CD36,TREM2,CXCL8,CXCR2
GO: Biological Process	GO:0042116	macrophage activation				1.59e-11	9.08e-08	3.86e-10	3.56e-09	17	117	IL10,VSIG4,TLR7,ITGAM,ITGB2,CD84,TYROBP,PTPRC,FCGR2B,C1QA,C5AR1,IL33,TLR1,TLR2,TLR4,TREM2,IL6
GO: Biological Process	GO:0006900	vesicle budding from membrane				1.78e-11	1.01e-07	4.28e-10	3.95e-09	46	884	IL10RA,CD300A,CLEC7A,HMOX1,ITGA4,ITGAM,ITGB2,CD163,FCER1G,FCGR1B,TRAT1,FCGR2B,FCN1,PIK3CG,C3,BIN2,CLEC10A,RAC2,LILRB4,SELE,DOCK2,MRC1,SFRP4,APOC1,APOE,OLR1,AREG,LGALS3,MSR1,LIPA,MCTP1,CD14,CD36,JCHAIN,IGKC,SERPINE1,TREM2,IGLC1,GREM1,TRBC1,LY75,CTSZ,SOAT1,CXCL8,CXCR2,NCKAP1L
GO: Biological Process	GO:0045597	positive regulation of cell differentiation				1.84e-11	1.05e-07	4.42e-10	4.08e-09	50	1020	IL10,HLA-DMA,INHBA,SERPINF1,GATA6,CLEC7A,EVI2B,DCSTAMP,ITGAM,PTGS2,ZEB2,TWIST1,CCR2,CCN4,TYROBP,PTPRC,SASH3,VNN1,BTK,CXCL9,CCR1,CCL5,IL33,COL1A1,LILRB4,SFRP4,ANXA1,APOE,CR1,LEP,NLRP3,LGALS3,MSR1,IGF1,TIMP2,EGR3,PLXNC1,CD86,CD36,TLR2,SERPINE1,TREM2,DUSP10,GREM1,TNFRSF1B,LYN,IL6,HCLS1,IL7R,NCKAP1L
GO: Biological Process	GO:0002690	positive regulation of leukocyte chemotaxis				2.24e-11	1.28e-07	5.37e-10	4.95e-09	16	103	CCR2,CCL2,CCR1,C3AR1,CCL4,CCL5,CCL7,C5AR1,RAC2,SELL,PLA2G7,SERPINE1,IL6,CXCL8,CXCR2,NCKAP1L
GO: Biological Process	GO:0045765	regulation of angiogenesis				2.28e-11	1.3e-07	5.42e-10	5e-09	29	382	CYBB,IL10,SERPINF1,GATA6,HMOX1,CHI3L1,ITGAX,ITGB2,TWIST1,CCR2,CCL2,C3,C3AR1,CCL5,CCL11,C5AR1,GPNMB,MMP9,ALOX5,ADAM12,LEP,LGALS3,THBS2,CD36,SERPINE1,GREM1,IL6,CXCL8,CXCR2
GO: Biological Process	GO:1901342	regulation of vasculature development				3.32e-11	1.89e-07	7.87e-10	7.26e-09	29	388	CYBB,IL10,SERPINF1,GATA6,HMOX1,CHI3L1,ITGAX,ITGB2,TWIST1,CCR2,CCL2,C3,C3AR1,CCL5,CCL11,C5AR1,GPNMB,MMP9,ALOX5,ADAM12,LEP,LGALS3,THBS2,CD36,SERPINE1,GREM1,IL6,CXCL8,CXCR2
GO: Biological Process	GO:0031348	negative regulation of defense response				3.42e-11	1.95e-07	8.08e-10	7.45e-09	24	265	SLAMF8,IL10,ACP5,SERPINF1,VSIG4,FGL2,NOD2,PTPRC,FCGR2B,MICB,MMP12,ALOX5,NT5E,AOAH,SAMHD1,APOE,CR1,NLRP3,IGF1,CD44,IRAK3,DUSP10,TNFAIP6,TNFRSF1B
GO: Biological Process	GO:0050869	negative regulation of B cell activation				3.45e-11	1.96e-07	8.08e-10	7.45e-09	11	39	IL10,INHBA,CD300A,SAMSN1,LAPTM5,TYROBP,FCGR2B,BTK,MNDA,CR1,LYN
GO: Biological Process	GO:0045730	respiratory burst				3.45e-11	1.96e-07	8.08e-10	7.45e-09	11	39	CYBB,SLAMF8,CD52,CLEC7A,NCF2,NCF4,PIK3CG,RAC2,JCHAIN,DUSP10,HCK
GO: Biological Process	GO:0002221	pattern recognition receptor signaling pathway				3.65e-11	2.08e-07	8.52e-10	7.86e-09	22	221	CD300A,PTPN22,TLR7,LY96,ITGAM,ITGB2,NOD2,IFIH1,S100A8,S100A9,FCN1,BTK,BIRC3,CD14,CD86,CD36,TLR1,TLR2,TLR4,IRAK3,LYN,CTSS
GO: Biological Process	GO:0032623	interleukin-2 production				3.76e-11	2.14e-07	8.75e-10	8.07e-09	14	76	PDE4B,VSIG4,CLEC7A,LAPTM5,NOD2,CCR2,PTPRC,FCER1G,SASH3,LILRB4,ANXA1,CR1,CD28,CD86
GO: Biological Process	GO:0009595	detection of biotic stimulus				4.68e-11	2.67e-07	1.08e-09	1e-08	11	40	CLEC7A,LY96,NOD2,FAP,SRPX,NLRP3,TLR1,TLR2,TLR4,CRTAM,TREM2
GO: Biological Process	GO:0045621	positive regulation of lymphocyte differentiation				4.71e-11	2.68e-07	1.09e-09	1e-08	17	125	IL10,HLA-DMA,CCR2,PTPRC,SASH3,VNN1,BTK,LILRB4,ANXA1,CR1,NLRP3,EGR3,CD86,DUSP10,IL6,IL7R,NCKAP1L
GO: Biological Process	GO:0008285	negative regulation of cell population proliferation				7.47e-11	4.26e-07	1.72e-09	1.58e-08	45	889	IL10,EREG,INHBA,CD300A,SERPINF1,VSIG4,GATA6,HMOX1,PTGS2,LAPTM5,ADORA2B,TYROBP,ADORA3,FAP,FCGR2B,SCG2,BTK,AHR,CCL2,CCL8,SRPX,GPNMB,MMP9,MNDA,ALOX5,IL33,LILRB4,LST1,SFRP4,RARRES1,APOE,CR1,OGN,LGALS3,IGF1,TIMP2,CD86,TLR2,CRTAM,CD44,DUSP10,GREM1,LYN,IL6,CXCL8
GO: Biological Process	GO:0032653	regulation of interleukin-10 production				7.82e-11	4.45e-07	1.79e-09	1.65e-08	13	66	CLEC7A,NOD2,CD84,TYROBP,FCER1G,FCGR2B,SASH3,LILRB4,CD28,TLR2,TLR4,TREM2,IL6
GO: Biological Process	GO:0010942	positive regulation of cell death				8.18e-11	4.66e-07	1.86e-09	1.72e-08	42	792	IL10,INHBA,RASSF2,STK17B,GATA6,CLEC7A,NCF2,HMOX1,ITGA4,ITGAM,ITGB2,PTGS2,LAPTM5,S100A8,S100A9,TYROBP,FAP,PTPRC,FCGR2B,KCNMA1,C1QA,CCL2,CCL5,SRPX,MMP2,MMP9,MNDA,VAV1,SFRP4,ANXA1,APOE,LEP,CD36,GZMA,TLR4,CD44,TNFRSF1B,LYN,CTSD,IL6,CTSZ,CXCR2
GO: Biological Process	GO:0032663	regulation of interleukin-2 production				9.56e-11	5.44e-07	2.17e-09	2e-08	13	67	PDE4B,VSIG4,CLEC7A,LAPTM5,NOD2,CCR2,PTPRC,SASH3,LILRB4,ANXA1,CR1,CD28,CD86
GO: Biological Process	GO:0071346	cellular response to interferon-gamma				1.06e-10	6.02e-07	2.39e-09	2.2e-08	20	190	HLA-DRB4,GBP2,PTAFR,TRIM22,FCGR1B,CCL2,CCL4,CCL5,CCL7,CCL8,CCL11,CCL18,CCL20,MRC1,CASP1,IRF8,TLR2,TLR4,CD44,HCK
GO: Biological Process	GO:0030888	regulation of B cell proliferation				1.16e-10	6.63e-07	2.62e-09	2.42e-08	13	68	IL10,CD300A,TYROBP,PTPRC,FCGR2B,SASH3,BTK,AHR,MNDA,GPR183,TLR4,LYN,NCKAP1L
GO: Biological Process	GO:0070372	regulation of ERK1 and ERK2 cascade				1.17e-10	6.66e-07	2.62e-09	2.42e-08	27	356	PTPN22,CHI3L1,NOD2,PTPRC,CCL2,C3,CCR1,CCL4,CCL5,CCL7,CCL8,CCL11,C5AR1,GPNMB,CCL18,CCL20,GPR183,APOE,IGF1,CD36,TLR2,TLR4,CD44,TREM2,DUSP10,LYN,IL6
GO: Biological Process	GO:0002673	regulation of acute inflammatory response				1.49e-10	8.47e-07	3.32e-09	3.06e-08	12	56	PTGS2,FCER1G,FCGR2B,PIK3CG,BTK,C3,CCL5,ALOX5AP,NLRP3,AOC3,OSMR,IL6
GO: Biological Process	GO:0032677	regulation of interleukin-8 production				1.6e-10	9.09e-07	3.55e-09	3.27e-08	15	100	IL10,CLEC7A,PTPN22,TLR7,NOD2,PTPRC,FCN1,ANXA1,CD2,CD14,TLR1,TLR2,TLR4,SERPINE1,IL6
GO: Biological Process	GO:0002675	positive regulation of acute inflammatory response				1.73e-10	9.84e-07	3.83e-09	3.53e-08	10	34	PTGS2,FCER1G,PIK3CG,BTK,C3,CCL5,ALOX5AP,AOC3,OSMR,IL6
GO: Biological Process	GO:0001906	cell killing				1.9e-10	1.08e-06	4.2e-09	3.87e-08	21	218	IL10,CFH,CLEC7A,ITGAM,TYROBP,S100A12,PTPRC,FCGR2B,CCL2,C3,CCL20,CXCL6,VAV1,LEP,LGALS3,GZMB,CRTAM,TREM1,SLAMF7,LYZ,IL7R
GO: Biological Process	GO:0032613	interleukin-10 production				2.06e-10	1.17e-06	4.53e-09	4.17e-08	13	71	CLEC7A,NOD2,CD84,TYROBP,FCER1G,FCGR2B,SASH3,LILRB4,CD28,TLR2,TLR4,TREM2,IL6
GO: Biological Process	GO:0009719	response to endogenous stimulus				2.15e-10	1.23e-06	4.71e-09	4.35e-08	68	1780	CYBB,IL10,EREG,PDE4B,MYO5A,INHBA,CES1,ASPN,SERPINF1,GATA6,TCIRG1,PTPN22,NCF2,HMOX1,ITGA4,PTAFR,PTGDR,ME1,ITGB2,ADCY7,NOD2,ADORA2B,FCER1G,PTPRE,FCGR2B,PIK3CG,LPXN,KCNMA1,AHR,HRH1,CCL2,FGF7,CCL5,GNA15,MMP2,PLN,COL1A1,COL1A2,SFRP4,COL16A1,COMP,ANXA1,FOLR2,NR4A2,APOE,SLC1A3,AQP9,LEP,NLRP3,AREG,POSTN,IGF1,TIMP2,EGR3,LOX,CD36,TLR2,TLR4,SERPINE1,CD44,TREM2,GREM1,LYN,IL1RN,CTSS,IL6,HCLS1,CXCL8
GO: Biological Process	GO:0060627	regulation of vesicle-mediated transport				2.19e-10	1.25e-06	4.77e-09	4.4e-08	36	625	MYO5A,CD300A,CLEC7A,HMOX1,PTAFR,ADGRE2,ITGAM,ITGB2,NOD2,CD84,CCR2,ADORA2B,PTPRC,FCER1G,FCGR2B,CCL2,C3,FGR,RAC2,SELE,DOCK2,SFRP4,ANXA1,APOC1,APOE,LGALS3,MCTP1,CD14,CD36,TLR2,SERPINE1,TREM2,GREM1,LYN,HCK,NCKAP1L
GO: Biological Process	GO:0050921	positive regulation of chemotaxis				2.26e-10	1.29e-06	4.91e-09	4.53e-08	18	157	CCR2,SCG2,CCL2,CCR1,C3AR1,CCL4,CCL5,CCL7,C5AR1,RAC2,SELL,PLA2G7,SERPINE1,TREM2,IL6,CXCL8,CXCR2,NCKAP1L
GO: Biological Process	GO:0071675	regulation of mononuclear cell migration				2.38e-10	1.36e-06	5.16e-09	4.76e-08	16	120	SLAMF8,ITGA4,CCR2,CCL2,CCR1,C3AR1,CCL4,CCL5,CCL7,C5AR1,CCL20,PLA2G7,LGALS3,SERPINE1,GREM1,LYN
GO: Biological Process	GO:1904018	positive regulation of vasculature development				2.91e-10	1.66e-06	6.26e-09	5.77e-08	20	201	CYBB,IL10,GATA6,HMOX1,CHI3L1,ITGAX,ITGB2,TWIST1,C3,C3AR1,CCL5,CCL11,C5AR1,MMP9,ADAM12,LGALS3,SERPINE1,GREM1,CXCL8,CXCR2
GO: Biological Process	GO:0045766	positive regulation of angiogenesis				2.91e-10	1.66e-06	6.26e-09	5.77e-08	20	201	CYBB,IL10,GATA6,HMOX1,CHI3L1,ITGAX,ITGB2,TWIST1,C3,C3AR1,CCL5,CCL11,C5AR1,MMP9,ADAM12,LGALS3,SERPINE1,GREM1,CXCL8,CXCR2
GO: Biological Process	GO:0032722	positive regulation of chemokine production				2.96e-10	1.69e-06	6.34e-09	5.85e-08	13	73	CLEC7A,TLR7,HMOX1,TWIST1,NOD2,CD84,ADORA2B,CCL5,IL33,POSTN,TLR2,TLR4,IL6
GO: Biological Process	GO:0002920	regulation of humoral immune response				3.26e-10	1.85e-06	6.92e-09	6.38e-08	17	141	CFH,HLA-DMA,VSIG4,GATA6,NOD2,PTPRC,FCGR2B,C1QA,C1QB,C1R,C1S,C3,C3AR1,C5AR1,CR1,IGKC,IGLC1
GO: Biological Process	GO:0032612	interleukin-1 production				3.26e-10	1.85e-06	6.92e-09	6.38e-08	17	141	IL10,ACP5,CLEC7A,NOD2,TYROBP,CCL20,MNDA,LILRB4,ANXA1,CASP1,NLRP3,IGF1,CD36,TLR2,TLR4,TREM2,IL6
GO: Biological Process	GO:0032418	lysosome localization				3.42e-10	1.95e-06	7.24e-09	6.68e-08	14	89	CD300A,HMOX1,ADGRE2,PTGDR,CD84,ADORA2B,FCER1G,PIK3CG,BTK,FGR,RAC2,LAT2,MILR1,LYN
GO: Biological Process	GO:0070371	ERK1 and ERK2 cascade				4.21e-10	2.4e-06	8.87e-09	8.18e-08	27	377	PTPN22,CHI3L1,NOD2,PTPRC,CCL2,C3,CCR1,CCL4,CCL5,CCL7,CCL8,CCL11,C5AR1,GPNMB,CCL18,CCL20,GPR183,APOE,IGF1,CD36,TLR2,TLR4,CD44,TREM2,DUSP10,LYN,IL6
GO: Biological Process	GO:0002755	MyD88-dependent toll-like receptor signaling pathway				4.39e-10	2.5e-06	9.22e-09	8.5e-08	10	37	CD300A,TLR7,LY96,BTK,CD14,CD36,TLR1,TLR2,TLR4,IRAK3
GO: Biological Process	GO:0002705	positive regulation of leukocyte mediated immunity				4.54e-10	2.59e-06	9.51e-09	8.78e-08	17	144	CLEC7A,PTAFR,ITGAM,ITGB2,NOD2,TYROBP,PTPRC,FCER1G,SASH3,BTK,CCL2,C3,VAV1,NLRP3,CD28,CRTAM,IL6
GO: Biological Process	GO:0006898	receptor-mediated endocytosis				4.66e-10	2.66e-06	9.73e-09	8.98e-08	28	406	CD300A,HMOX1,ITGA4,ITGAM,ITGB2,CD163,FCER1G,FCGR1B,FCGR2B,C3,LILRB4,SELE,MRC1,SFRP4,APOC1,APOE,MSR1,LIPA,CD14,CD36,JCHAIN,IGKC,SERPINE1,IGLC1,GREM1,SOAT1,CXCL8,CXCR2
GO: Biological Process	GO:0045582	positive regulation of T cell differentiation				4.87e-10	2.78e-06	1.01e-08	9.34e-08	15	108	HLA-DMA,CCR2,PTPRC,SASH3,VNN1,LILRB4,ANXA1,CR1,NLRP3,EGR3,CD86,DUSP10,IL6,IL7R,NCKAP1L
GO: Biological Process	GO:0019730	antimicrobial humoral response				5.14e-10	2.93e-06	1.06e-08	9.81e-08	18	165	GATA6,NOD2,S100A8,S100A9,S100A12,CXCL9,CCL2,CCL20,CXCL6,PPBP,CXCL2,CXCL3,LGALS3,RNASE2,RNASE6,JCHAIN,LYZ,CXCL8
GO: Biological Process	GO:0048872	homeostasis of number of cells				5.23e-10	2.98e-06	1.08e-08	9.95e-08	26	354	CFH,PDE4B,INHBA,RASSF2,TCIRG1,HMOX1,ITGAM,CCR2,FCER1G,SASH3,AHR,CCL2,COL14A1,P2RY14,CXCL6,ANXA1,DOCK10,GPR183,LIPA,CD44,LYN,IL6,HCLS1,IL7R,CXCR2,NCKAP1L
GO: Biological Process	GO:0048585	negative regulation of response to stimulus				5.81e-10	3.31e-06	1.19e-08	1.1e-07	71	1945	SLAMF8,IL10,EREG,PDE4B,RASSF2,ASPN,CD300A,ACP5,SERPINF1,VSIG4,PTPN22,HMOX1,LY96,SAMSN1,PTGS2,ADCY7,FGL2,TWIST1,LAPTM5,NOD2,CD84,CCR2,FAP,PTPRC,PTPRE,FCGR2B,VNN1,SCG2,MICB,LPXN,CCL2,CCL5,PLAUR,PLEK,MMP9,MMP12,ALOX5,IL33,LILRB4,SFRP4,GPR18,NT5E,ANXA1,AOAH,NR4A2,SAMHD1,APOE,CR1,RGS1,LEP,NLRP3,AREG,LGALS3,THBD,IGF1,MCTP1,CD14,TIMP2,TLR4,SERPINE1,CD44,IRAK3,DUSP10,GREM1,TNFAIP6,TNFRSF1B,LYN,IL1RN,IL6,…
GO: Biological Process	GO:0050764	regulation of phagocytosis				6.34e-10	3.61e-06	1.3e-08	1.2e-07	15	110	CD300A,CLEC7A,NOD2,PTPRC,FCER1G,FCGR2B,CCL2,C3,FGR,DOCK2,CD36,TLR2,TREM2,HCK,NCKAP1L
GO: Biological Process	GO:0034341	response to interferon-gamma				6.35e-10	3.62e-06	1.3e-08	1.2e-07	20	210	HLA-DRB4,GBP2,PTAFR,TRIM22,FCGR1B,CCL2,CCL4,CCL5,CCL7,CCL8,CCL11,CCL18,CCL20,MRC1,CASP1,IRF8,TLR2,TLR4,CD44,HCK
GO: Biological Process	GO:0032652	regulation of interleukin-1 production				7.99e-10	4.55e-06	1.63e-08	1.5e-07	16	130	IL10,ACP5,CLEC7A,NOD2,TYROBP,CCL20,MNDA,LILRB4,ANXA1,CASP1,NLRP3,IGF1,TLR2,TLR4,TREM2,IL6
GO: Biological Process	GO:0090025	regulation of monocyte chemotaxis				8.43e-10	4.8e-06	1.7e-08	1.57e-07	9	29	SLAMF8,CCR2,CCL2,CCR1,CCL5,PLA2G7,SERPINE1,GREM1,LYN
GO: Biological Process	GO:0007596	blood coagulation				8.44e-10	4.8e-06	1.7e-08	1.57e-07	26	362	CFH,GATA6,HPSE,S100A9,FAP,FCER1G,PIK3CG,C3,GNA15,PLAUR,PLEK,VAV1,COL1A1,COL1A2,COMP,APOE,LCP2,PAPSS2,ZFPM2,MMRN1,THBD,CD36,TLR4,SERPINE1,LYN,IL6
GO: Biological Process	GO:0007162	negative regulation of cell adhesion				9.25e-10	5.27e-06	1.86e-08	1.72e-07	25	337	IL10,CD300A,VSIG4,PTPN22,FGL2,LAPTM5,PTPRC,ADAMDEC1,FCGR2B,LPXN,GPNMB,MMP2,MMP12,COL1A1,LILRB4,ANXA1,CR1,LGALS3,POSTN,PLXNC1,CD86,CRTAM,SERPINE1,CD44,IL1RN
GO: Biological Process	GO:0050851	antigen receptor-mediated signaling pathway				9.83e-10	5.6e-06	1.97e-08	1.82e-07	25	338	PDE4B,CD300A,HLA-DRB4,PTPN22,ITK,LAPTM5,PTPRC,TRAT1,FCGR2B,BTK,LPXN,MNDA,LILRB4,THEMIS2,LAT2,LCP2,LGALS3,CD3G,CD28,IGKC,IGLC1,TRBC1,LYN,FYB1,NCKAP1L
GO: Biological Process	GO:0010243	response to organonitrogen compound				1.09e-09	6.21e-06	2.18e-08	2.01e-07	50	1147	CYBB,IL10,EREG,PDE4B,MYO5A,CES1,SERPINF1,TCIRG1,PTPN22,ITGA4,PTAFR,ITGB2,ADCY7,NOD2,ADORA2B,FCER1G,PTPRE,FCGR2B,PIK3CG,AHR,HRH1,GNA15,C5AR1,MMP2,MMP9,MMP12,NNMT,PLN,COL1A1,COL1A2,SELL,COL16A1,ANXA1,FOLR2,NR4A2,CASP1,APOE,SLC1A3,AQP9,LEP,NLRP3,THBD,IGF1,CD36,TLR2,TLR4,TREM2,IRAK3,LYN,IL6
GO: Biological Process	GO:0007599	hemostasis				1.13e-09	6.43e-06	2.25e-08	2.08e-07	26	367	CFH,GATA6,HPSE,S100A9,FAP,FCER1G,PIK3CG,C3,GNA15,PLAUR,PLEK,VAV1,COL1A1,COL1A2,COMP,APOE,LCP2,PAPSS2,ZFPM2,MMRN1,THBD,CD36,TLR4,SERPINE1,LYN,IL6
GO: Biological Process	GO:0050817	coagulation				1.2e-09	6.82e-06	2.38e-08	2.19e-07	26	368	CFH,GATA6,HPSE,S100A9,FAP,FCER1G,PIK3CG,C3,GNA15,PLAUR,PLEK,VAV1,COL1A1,COL1A2,COMP,APOE,LCP2,PAPSS2,ZFPM2,MMRN1,THBD,CD36,TLR4,SERPINE1,LYN,IL6
GO: Biological Process	GO:0071887	leukocyte apoptotic process				1.26e-09	7.16e-06	2.49e-08	2.29e-07	16	134	IL10,ITGAM,NOD2,CLC,FCER1G,BTK,CCL5,ANXA1,LGALS3,CD3G,CD44,LYN,IL6,HCLS1,IL7R,CXCR2
GO: Biological Process	GO:0033003	regulation of mast cell activation				1.27e-09	7.21e-06	2.5e-08	2.3e-07	11	53	CD300A,HMOX1,ADGRE2,CD84,ADORA2B,FCER1G,PTPRE,FGR,RAC2,MILR1,LYN
GO: Biological Process	GO:0006875	cellular metal ion homeostasis				1.27e-09	7.25e-06	2.5e-08	2.31e-07	36	667	CD52,CYBRD1,MYO5A,TCIRG1,HMOX1,PTGDR,CCR2,S100A8,S100A9,PTPRC,CLIC2,PIK3CG,CXCL9,KCNMA1,CCL2,CCR1,C3AR1,CCL5,GNA15,CCL7,CCR5,CCL8,CCL11,C5AR1,PLN,GPR18,GPR65,SLC31A2,FPR1,FPR3,CCRL2,APOE,SLC1A3,CD36,LYN,CXCR2
GO: Biological Process	GO:0002702	positive regulation of production of molecular mediator of immune response				1.35e-09	7.71e-06	2.65e-08	2.44e-07	15	116	IL10,CLEC7A,PTPN22,LAPTM5,NOD2,PTPRC,FCER1G,SASH3,IL33,NLRP3,CD28,CD36,TLR2,TLR4,IL6
GO: Biological Process	GO:0048247	lymphocyte chemotaxis				1.61e-09	9.19e-06	3.15e-08	2.9e-07	12	68	CCR2,PIK3CG,CCL2,CCL4,CCL5,CCL7,CCL8,CCL11,CCL18,CCL20,CH25H,GPR183
GO: Biological Process	GO:1901698	response to nitrogen compound				1.66e-09	9.43e-06	3.22e-08	2.97e-07	52	1236	CYBB,IL10,EREG,PDE4B,MYO5A,CES1,SERPINF1,TCIRG1,PTPN22,ITGA4,PTAFR,ITGB2,ADCY7,NOD2,IFIH1,ADORA2B,FCER1G,PTPRE,FCGR2B,PIK3CG,AHR,HRH1,GNA15,C5AR1,MMP2,MMP9,MMP12,NNMT,PLN,COL1A1,COL1A2,SELL,COL16A1,ANXA1,FOLR2,NR4A2,CASP1,TDO2,APOE,SLC1A3,AQP9,LEP,NLRP3,THBD,IGF1,CD36,TLR2,TLR4,TREM2,IRAK3,LYN,IL6
GO: Biological Process	GO:0046634	regulation of alpha-beta T cell activation				2.19e-09	1.25e-05	4.24e-08	3.91e-07	15	120	CD300A,PTPN22,CCR2,PTPRC,SASH3,CCL20,LILRB4,ANXA1,NLRP3,CD28,CD86,CRTAM,CD44,IL6,NCKAP1L
GO: Biological Process	GO:0036336	dendritic cell migration				2.26e-09	1.28e-05	4.35e-08	4.02e-07	9	32	SLAMF8,CCR2,PIK3CG,CCR1,CCL5,CCR5,ALOX5,GPR183,CXCR2
GO: Biological Process	GO:0032494	response to peptidoglycan				2.32e-09	1.32e-05	4.45e-08	4.11e-07	7	15	NOD2,C5AR1,NLRP3,TLR2,TREM2,IRAK3,IL6
GO: Biological Process	GO:0043068	positive regulation of programmed cell death				2.32e-09	1.32e-05	4.45e-08	4.11e-07	37	715	IL10,INHBA,RASSF2,STK17B,GATA6,CLEC7A,NCF2,HMOX1,ITGA4,ITGAM,PTGS2,LAPTM5,S100A8,S100A9,TYROBP,FAP,PTPRC,KCNMA1,CCL2,CCL5,SRPX,MMP2,MMP9,MNDA,VAV1,SFRP4,ANXA1,LEP,GZMA,TLR4,CD44,TNFRSF1B,LYN,CTSD,IL6,CTSZ,CXCR2
GO: Biological Process	GO:0042100	B cell proliferation				3.21e-09	1.83e-05	6.14e-08	5.66e-07	14	105	IL10,CD300A,TYROBP,PTPRC,FCGR2B,SASH3,BTK,AHR,MNDA,GPR183,TLR4,LYN,IL7R,NCKAP1L
GO: Biological Process	GO:0051050	positive regulation of transport				3.99e-09	2.27e-05	7.61e-08	7.02e-07	47	1081	INHBA,CES1,CLEC7A,PTPN22,PTAFR,ITGAM,ITGB2,PTGS2,NOD2,CCR2,S100A8,ADORA2B,PTPRC,FCER1G,FCGR2B,CXCL9,CCL2,C3,CCR1,CCL4,CCL5,FGR,ALOX5,PLTP,RAC2,SELE,DOCK2,SFRP4,ANXA1,APOE,LEP,LGALS3,ABCG1,IGF1,CD14,CD36,TLR2,GZMB,TLR4,SERPINE1,AOC3,TREM2,GREM1,CTSS,IL6,HCLS1,NCKAP1L
GO: Biological Process	GO:0019220	regulation of phosphate metabolic process				4.52e-09	2.58e-05	8.59e-08	7.92e-07	65	1790	SLAMF8,EREG,INHBA,RASSF2,CD300A,CLEC7A,PTPN22,TLR7,CHI3L1,PTAFR,SAMSN1,ITGB2,PTGS2,ZEB2,ADCY7,FABP4,TWIST1,NOD2,ADORA2B,S100A12,SRPX2,PTPRC,PIK3CG,AHR,HRH1,FGF7,C3,CCL5,PLAUR,C5AR1,GPNMB,HSD11B1,FGR,PLEK,MMP9,RAC2,LILRB4,MDFIC,NIBAN1,MAP3K8,FPR1,APOC1,APOE,LCP2,LEP,AREG,LGALS3,IGF1,CD86,LOX,CD36,VCAN,TLR1,TLR4,CD44,TREM2,IRAK3,DUSP10,GREM1,LYN,IL1RN,IL6,HCLS1,NCKAP1L,PHACTR1
GO: Biological Process	GO:0051174	regulation of phosphorus metabolic process				4.63e-09	2.63e-05	8.75e-08	8.07e-07	65	1791	SLAMF8,EREG,INHBA,RASSF2,CD300A,CLEC7A,PTPN22,TLR7,CHI3L1,PTAFR,SAMSN1,ITGB2,PTGS2,ZEB2,ADCY7,FABP4,TWIST1,NOD2,ADORA2B,S100A12,SRPX2,PTPRC,PIK3CG,AHR,HRH1,FGF7,C3,CCL5,PLAUR,C5AR1,GPNMB,HSD11B1,FGR,PLEK,MMP9,RAC2,LILRB4,MDFIC,NIBAN1,MAP3K8,FPR1,APOC1,APOE,LCP2,LEP,AREG,LGALS3,IGF1,CD86,LOX,CD36,VCAN,TLR1,TLR4,CD44,TREM2,IRAK3,DUSP10,GREM1,LYN,IL1RN,IL6,HCLS1,NCKAP1L,PHACTR1
GO: Biological Process	GO:0070555	response to interleukin-1				4.73e-09	2.7e-05	8.92e-08	8.23e-07	19	212	GBP2,CHI3L1,NOD2,CCL2,CCL4,CCL5,CCL7,CCL8,CCL11,CCL18,CCL20,SELE,ANXA1,MAP3K8,SERPINE1,IRAK3,IL1RN,IL6,CXCL8
GO: Biological Process	GO:0032757	positive regulation of interleukin-8 production				5.12e-09	2.91e-05	9.61e-08	8.87e-07	11	60	CLEC7A,TLR7,NOD2,FCN1,CD2,CD14,TLR1,TLR2,TLR4,SERPINE1,IL6
GO: Biological Process	GO:0001780	neutrophil homeostasis				5.71e-09	3.25e-05	1.07e-07	9.86e-07	8	25	CFH,PDE4B,ITGAM,CCR2,ANXA1,CD44,IL6,CXCR2
GO: Biological Process	GO:0001932	regulation of protein phosphorylation				6.15e-09	3.5e-05	1.15e-07	1.06e-06	54	1362	EREG,INHBA,RASSF2,CD300A,CLEC7A,PTPN22,TLR7,CHI3L1,SAMSN1,ITGB2,PTGS2,ZEB2,ADCY7,FABP4,TWIST1,NOD2,ADORA2B,S100A12,PTPRC,PIK3CG,FGF7,C3,CCL5,PLAUR,C5AR1,GPNMB,FGR,MMP9,RAC2,LILRB4,MDFIC,NIBAN1,MAP3K8,FPR1,APOE,LCP2,LEP,AREG,IGF1,CD86,LOX,CD36,TLR1,TLR4,CD44,TREM2,IRAK3,DUSP10,GREM1,LYN,IL1RN,IL6,HCLS1,NCKAP1L
GO: Biological Process	GO:0016064	immunoglobulin mediated immune response				6.98e-09	3.97e-05	1.3e-07	1.2e-06	20	241	IL10,CFH,HLA-DMA,TCIRG1,FGL2,NOD2,PTPRC,FCER1G,FCGR2B,BTK,C1QA,C1QB,C1R,C1S,C3,CR1,CD28,IGKC,IGLC1,TRBC1
GO: Biological Process	GO:0048878	chemical homeostasis				7.34e-09	4.18e-05	1.36e-07	1.26e-06	54	1369	SLAMF8,CFH,CD52,CYBRD1,MYO5A,CES1,SERPINF1,TCIRG1,HMOX1,PTGDR,ADCY7,FABP4,CCR2,S100A8,CCN4,S100A9,PTPRC,CLIC2,PIK3CG,CXCL9,KCNMA1,CCL2,FGF7,PYGL,CCR1,C3AR1,CCL5,GNA15,CCL7,CCR5,CCL8,CCL11,C5AR1,PLN,ALOX5,STEAP1,SFRP4,GPR18,GPR65,SLC31A2,FPR1,FPR3,CCRL2,APOE,SLC1A3,AQP9,LEP,ABCG1,IGF1,CD36,LYN,IL6,SOAT1,CXCR2
GO: Biological Process	GO:0006911	phagocytosis, engulfment				7.45e-09	4.24e-05	1.38e-07	1.27e-06	15	131	CD300A,ITGAM,ITGB2,FCER1G,FCGR2B,C3,BIN2,RAC2,MSR1,CD36,IGKC,TREM2,IGLC1,TRBC1,NCKAP1L
GO: Biological Process	GO:0055065	metal ion homeostasis				8.02e-09	4.57e-05	1.48e-07	1.36e-06	37	749	CD52,CYBRD1,MYO5A,TCIRG1,HMOX1,PTGDR,CCR2,S100A8,S100A9,PTPRC,CLIC2,PIK3CG,CXCL9,KCNMA1,CCL2,CCR1,C3AR1,CCL5,GNA15,CCL7,CCR5,CCL8,CCL11,C5AR1,PLN,STEAP1,GPR18,GPR65,SLC31A2,FPR1,FPR3,CCRL2,APOE,SLC1A3,CD36,LYN,CXCR2
GO: Biological Process	GO:0002407	dendritic cell chemotaxis				8.12e-09	4.62e-05	1.49e-07	1.38e-06	8	26	SLAMF8,CCR2,PIK3CG,CCR1,CCL5,CCR5,GPR183,CXCR2
GO: Biological Process	GO:0030003	cellular cation homeostasis				8.31e-09	4.73e-05	1.52e-07	1.4e-06	37	750	SLAMF8,CD52,CYBRD1,MYO5A,TCIRG1,HMOX1,PTGDR,CCR2,S100A8,S100A9,PTPRC,CLIC2,PIK3CG,CXCL9,KCNMA1,CCL2,CCR1,C3AR1,CCL5,GNA15,CCL7,CCR5,CCL8,CCL11,C5AR1,PLN,GPR18,GPR65,SLC31A2,FPR1,FPR3,CCRL2,APOE,SLC1A3,CD36,LYN,CXCR2
GO: Biological Process	GO:0032963	collagen metabolic process				9.18e-09	5.23e-05	1.68e-07	1.55e-06	15	133	ADORA2B,FAP,CCL2,MMP1,MMP2,MMP9,MMP12,COL1A1,COL1A2,COL5A1,COL15A1,SERPINE1,CTSD,CTSS,IL6
GO: Biological Process	GO:0019724	B cell mediated immunity				9.24e-09	5.26e-05	1.68e-07	1.55e-06	20	245	IL10,CFH,HLA-DMA,TCIRG1,FGL2,NOD2,PTPRC,FCER1G,FCGR2B,BTK,C1QA,C1QB,C1R,C1S,C3,CR1,CD28,IGKC,IGLC1,TRBC1
GO: Biological Process	GO:0072503	cellular divalent inorganic cation homeostasis				9.42e-09	5.37e-05	1.71e-07	1.58e-06	31	557	CD52,MYO5A,TCIRG1,PTGDR,CCR2,S100A8,S100A9,PTPRC,CLIC2,PIK3CG,CXCL9,CCL2,CCR1,C3AR1,CCL5,GNA15,CCL7,CCR5,CCL8,CCL11,C5AR1,PLN,GPR18,GPR65,FPR1,FPR3,CCRL2,APOE,CD36,LYN,CXCR2
GO: Biological Process	GO:0018108	peptidyl-tyrosine phosphorylation				9.8e-09	5.58e-05	1.77e-07	1.64e-06	26	407	EREG,CD300A,CLEC7A,PTPN22,SAMSN1,ITGB2,ITK,NOD2,PTPRC,BTK,FGF7,CCL5,FGR,LILRB4,LEP,AREG,IGF1,CD36,TLR4,CD44,TREM2,GREM1,LYN,HCK,IL6,HCLS1
GO: Biological Process	GO:0050730	regulation of peptidyl-tyrosine phosphorylation				1.06e-08	6.02e-05	1.9e-07	1.76e-06	22	298	EREG,CD300A,CLEC7A,PTPN22,SAMSN1,ITGB2,NOD2,PTPRC,FGF7,CCL5,LILRB4,LEP,AREG,IGF1,CD36,TLR4,CD44,TREM2,GREM1,LYN,IL6,HCLS1
GO: Biological Process	GO:0018212	peptidyl-tyrosine modification				1.14e-08	6.49e-05	2.05e-07	1.89e-06	26	410	EREG,CD300A,CLEC7A,PTPN22,SAMSN1,ITGB2,ITK,NOD2,PTPRC,BTK,FGF7,CCL5,FGR,LILRB4,LEP,AREG,IGF1,CD36,TLR4,CD44,TREM2,GREM1,LYN,HCK,IL6,HCLS1
GO: Biological Process	GO:0051345	positive regulation of hydrolase activity				1.19e-08	6.78e-05	2.13e-07	1.97e-06	41	900	CD300A,CLEC7A,PTAFR,ITK,LAPTM5,S100A8,S100A9,PTPRC,RASGRP3,HRH1,GM2A,CCL2,C3AR1,CCL4,CCL5,GNA15,CCL7,CCL8,CCL11,C5AR1,CCL18,CCL20,PLEK,VAV1,SELE,DOCK2,GPR18,GPR65,FPR1,FPR3,CASP1,DOCK10,CR1,RGS1,NLRP3,CD86,LYN,CTSD,ADAP2,CXCR2,NCKAP1L
GO: Biological Process	GO:0043304	regulation of mast cell degranulation				1.2e-08	6.82e-05	2.14e-07	1.97e-06	9	38	CD300A,HMOX1,ADGRE2,CD84,ADORA2B,FCER1G,FGR,RAC2,LYN
GO: Biological Process	GO:0050868	negative regulation of T cell activation				1.25e-08	7.11e-05	2.22e-07	2.05e-06	15	136	IL10,CD300A,VSIG4,PTPN22,FGL2,LAPTM5,FCGR2B,GPNMB,LILRB4,ANXA1,CR1,LGALS3,CD86,CRTAM,CD44
GO: Biological Process	GO:0006873	cellular ion homeostasis				1.4e-08	7.95e-05	2.48e-07	2.29e-06	37	765	SLAMF8,CD52,CYBRD1,MYO5A,TCIRG1,HMOX1,PTGDR,CCR2,S100A8,S100A9,PTPRC,CLIC2,PIK3CG,CXCL9,KCNMA1,CCL2,CCR1,C3AR1,CCL5,GNA15,CCL7,CCR5,CCL8,CCL11,C5AR1,PLN,GPR18,GPR65,SLC31A2,FPR1,FPR3,CCRL2,APOE,SLC1A3,CD36,LYN,CXCR2
GO: Biological Process	GO:0043065	positive regulation of apoptotic process				1.44e-08	8.19e-05	2.55e-07	2.35e-06	35	698	IL10,INHBA,RASSF2,STK17B,GATA6,NCF2,HMOX1,ITGA4,ITGAM,PTGS2,S100A8,S100A9,TYROBP,FAP,PTPRC,KCNMA1,CCL2,CCL5,SRPX,MMP2,MMP9,MNDA,VAV1,SFRP4,ANXA1,LEP,GZMA,TLR4,CD44,TNFRSF1B,LYN,CTSD,IL6,CTSZ,CXCR2
GO: Biological Process	GO:0045123	cellular extravasation				1.48e-08	8.43e-05	2.6e-07	2.4e-06	12	82	ITGA4,PTAFR,ITGAM,ITGB2,CCR2,PIK3CG,CCL2,CCL5,SELE,SELL,LEP,TREM1
GO: Biological Process	GO:0034121	regulation of toll-like receptor signaling pathway				1.48e-08	8.43e-05	2.6e-07	2.4e-06	12	82	CD300A,PTPN22,LY96,NOD2,BIRC3,CD14,CD36,TLR1,TLR2,TLR4,IRAK3,LYN
GO: Biological Process	GO:0033006	regulation of mast cell activation involved in immune response				1.53e-08	8.73e-05	2.69e-07	2.48e-06	9	39	CD300A,HMOX1,ADGRE2,CD84,ADORA2B,FCER1G,FGR,RAC2,LYN
GO: Biological Process	GO:0032611	interleukin-1 beta production				1.67e-08	9.5e-05	2.92e-07	2.69e-06	14	119	ACP5,CLEC7A,NOD2,TYROBP,MNDA,LILRB4,CASP1,NLRP3,IGF1,CD36,TLR2,TLR4,TREM2,IL6
GO: Biological Process	GO:0032720	negative regulation of tumor necrosis factor production				1.71e-08	9.71e-05	2.97e-07	2.74e-06	12	83	IL10,ACP5,PTPN22,TWIST1,NOD2,CLEC4A,GPNMB,GPR18,IGF1,TLR4,TREM2,IRAK3
GO: Biological Process	GO:0051092	positive regulation of NF-kappaB transcription factor activity				1.74e-08	9.88e-05	3.01e-07	2.78e-06	29	509	RASSF2,PTPN22,TLR7,HMOX1,LY96,CHI3L1,ITGB2,TRIM22,LAPTM5,NOD2,CD84,S100A8,S100A9,S100A12,BTK,LILRB4,CASP1,BIRC3,NLRP3,CD14,CD86,CD36,TLR1,TLR2,TLR4,TREM2,IRAK3,GREM1,IL6
GO: Biological Process	GO:0019722	calcium-mediated signaling				1.8e-08	0.000103	3.12e-07	2.87e-06	19	230	CCR2,PTPRC,TRAT1,CLIC2,BTK,CCR1,CCL4,CCR5,CCL20,PLEK,PLN,SELE,LAT2,CCRL2,IGF1,MCTP1,TREM2,CXCL8,CXCR2
GO: Biological Process	GO:0050728	negative regulation of inflammatory response				1.81e-08	0.000103	3.13e-07	2.89e-06	17	183	SLAMF8,IL10,ACP5,SERPINF1,NOD2,PTPRC,FCGR2B,ALOX5,NT5E,AOAH,APOE,NLRP3,IGF1,CD44,DUSP10,TNFAIP6,TNFRSF1B
GO: Biological Process	GO:0099024	plasma membrane invagination				1.86e-08	0.000106	3.19e-07	2.94e-06	15	140	CD300A,ITGAM,ITGB2,FCER1G,FCGR2B,C3,BIN2,RAC2,MSR1,CD36,IGKC,TREM2,IGLC1,TRBC1,NCKAP1L
GO: Biological Process	GO:0050830	defense response to Gram-positive bacterium				1.86e-08	0.000106	3.19e-07	2.94e-06	14	120	ACP5,GBP2,NOD2,C5AR1,FGR,NLRP3,RNASE2,RNASE6,CD36,TLR2,LYZ,HCK,IL6,IL7R
GO: Biological Process	GO:0033028	myeloid cell apoptotic process				1.95e-08	0.000111	3.33e-07	3.08e-06	9	40	CLEC5A,ITGAM,NOD2,FCER1G,CCL5,ANXA1,CD44,IL6,CXCR2
GO: Biological Process	GO:0061844	antimicrobial humoral immune response mediated by antimicrobial peptide				2.06e-08	0.000117	3.51e-07	3.23e-06	13	102	NOD2,S100A9,S100A12,CXCL9,CCL2,CCL20,CXCL6,PPBP,CXCL2,CXCL3,LGALS3,RNASE6,CXCL8
GO: Biological Process	GO:1903556	negative regulation of tumor necrosis factor superfamily cytokine production				2.25e-08	0.000128	3.82e-07	3.52e-06	12	85	IL10,ACP5,PTPN22,TWIST1,NOD2,CLEC4A,GPNMB,GPR18,IGF1,TLR4,TREM2,IRAK3
GO: Biological Process	GO:1901136	carbohydrate derivative catabolic process				2.25e-08	0.000128	3.82e-07	3.52e-06	18	209	NPL,PDE4B,CHI3L1,CHIT1,HPSE,ADA2,GM2A,MMP12,DPYD,NT5E,AOAH,KERA,SAMHD1,OMD,OGN,VCAN,CD44,LUM
GO: Biological Process	GO:0071347	cellular response to interleukin-1				2.31e-08	0.000132	3.91e-07	3.6e-06	17	186	GBP2,CHI3L1,NOD2,CCL2,CCL4,CCL5,CCL7,CCL8,CCL11,CCL18,CCL20,MAP3K8,SERPINE1,IRAK3,IL1RN,IL6,CXCL8
GO: Biological Process	GO:0032733	positive regulation of interleukin-10 production				2.46e-08	0.00014	4.14e-07	3.82e-06	9	41	CLEC7A,NOD2,FCER1G,SASH3,CD28,TLR2,TLR4,TREM2,IL6
GO: Biological Process	GO:0098771	inorganic ion homeostasis				2.53e-08	0.000144	4.26e-07	3.93e-06	39	853	SLAMF8,CD52,CYBRD1,MYO5A,TCIRG1,HMOX1,PTGDR,CCR2,S100A8,S100A9,PTPRC,CLIC2,PIK3CG,CXCL9,KCNMA1,CCL2,CCR1,C3AR1,CCL5,GNA15,CCL7,CCR5,CCL8,CCL11,C5AR1,PLN,STEAP1,SFRP4,GPR18,GPR65,SLC31A2,FPR1,FPR3,CCRL2,APOE,SLC1A3,CD36,LYN,CXCR2
GO: Biological Process	GO:0006874	cellular calcium ion homeostasis				2.55e-08	0.000145	4.26e-07	3.93e-06	29	518	CD52,MYO5A,TCIRG1,PTGDR,CCR2,PTPRC,CLIC2,PIK3CG,CXCL9,CCL2,CCR1,C3AR1,CCL5,GNA15,CCL7,CCR5,CCL8,CCL11,C5AR1,PLN,GPR18,GPR65,FPR1,FPR3,CCRL2,APOE,CD36,LYN,CXCR2
GO: Biological Process	GO:0030889	negative regulation of B cell proliferation				2.6e-08	0.000148	4.33e-07	4e-06	7	20	IL10,CD300A,TYROBP,FCGR2B,BTK,MNDA,LYN
GO: Biological Process	GO:0072507	divalent inorganic cation homeostasis				2.69e-08	0.000154	4.49e-07	4.14e-06	31	583	CD52,MYO5A,TCIRG1,PTGDR,CCR2,S100A8,S100A9,PTPRC,CLIC2,PIK3CG,CXCL9,CCL2,CCR1,C3AR1,CCL5,GNA15,CCL7,CCR5,CCL8,CCL11,C5AR1,PLN,GPR18,GPR65,FPR1,FPR3,CCRL2,APOE,CD36,LYN,CXCR2
GO: Biological Process	GO:0071677	positive regulation of mononuclear cell migration				2.77e-08	0.000158	4.6e-07	4.25e-06	11	70	ITGA4,CCR2,CCL2,CCR1,CCL4,CCL5,CCL7,CCL20,PLA2G7,LGALS3,SERPINE1
GO: Biological Process	GO:0072676	lymphocyte migration				2.84e-08	0.000162	4.71e-07	4.34e-06	14	124	ITGA4,CCR2,PIK3CG,CCL2,CCL4,CCL5,CCL7,CCL8,CCL11,CCL18,CCL20,CH25H,GPR183,CRTAM
GO: Biological Process	GO:0002434	immune complex clearance				2.92e-08	0.000166	4.81e-07	4.44e-06	5	7	CFH,CCR2,FCGR2B,CCL2,CR1
GO: Biological Process	GO:0002285	lymphocyte activation involved in immune response				3.49e-08	0.000199	5.75e-07	5.3e-06	18	215	IL10,FGL2,CCR2,PTPRC,FCER1G,FCGR2B,CCL20,ANXA1,DOCK10,GPR183,LCP1,CR1,NLRP3,LGALS3,CD28,CD86,TLR4,IL6
GO: Biological Process	GO:2000106	regulation of leukocyte apoptotic process				3.69e-08	0.00021	6.05e-07	5.58e-06	13	107	IL10,NOD2,FCER1G,BTK,CCL5,ANXA1,LGALS3,CD3G,CD44,LYN,HCLS1,IL7R,CXCR2
GO: Biological Process	GO:0032490	detection of molecule of bacterial origin				3.74e-08	0.000213	6.11e-07	5.64e-06	6	13	LY96,NOD2,TLR1,TLR2,TLR4,TREM2
GO: Biological Process	GO:0042325	regulation of phosphorylation				3.75e-08	0.000214	6.11e-07	5.64e-06	57	1558	SLAMF8,EREG,INHBA,RASSF2,CD300A,CLEC7A,PTPN22,TLR7,CHI3L1,SAMSN1,ITGB2,PTGS2,ZEB2,ADCY7,FABP4,TWIST1,NOD2,ADORA2B,S100A12,SRPX2,PTPRC,PIK3CG,FGF7,C3,CCL5,PLAUR,C5AR1,GPNMB,FGR,MMP9,RAC2,LILRB4,MDFIC,NIBAN1,MAP3K8,FPR1,APOE,LCP2,LEP,AREG,IGF1,CD86,LOX,CD36,TLR1,TLR4,CD44,TREM2,IRAK3,DUSP10,GREM1,LYN,IL1RN,IL6,HCLS1,NCKAP1L,PHACTR1
GO: Biological Process	GO:0032615	interleukin-12 production				3.76e-08	0.000214	6.11e-07	5.64e-06	11	72	IL10,ACP5,CLEC7A,LAPTM5,NOD2,IRF8,LEP,CD36,TLR2,TLR4,IRAK3
GO: Biological Process	GO:0002888	positive regulation of myeloid leukocyte mediated immunity				3.84e-08	0.000218	6.22e-07	5.74e-06	7	21	PTAFR,ITGAM,ITGB2,TYROBP,FCER1G,BTK,C3
GO: Biological Process	GO:0010517	regulation of phospholipase activity				4.32e-08	0.000246	6.99e-07	6.45e-06	16	171	PTAFR,ITK,HRH1,C3AR1,CCL5,GNA15,C5AR1,PLEK,SELE,GPR18,GPR65,ANXA1,FPR1,FPR3,CD86,CXCR2
GO: Biological Process	GO:0001934	positive regulation of protein phosphorylation				4.75e-08	0.00027	7.64e-07	7.05e-06	41	946	EREG,INHBA,RASSF2,CD300A,CLEC7A,CHI3L1,PTGS2,ZEB2,ADCY7,NOD2,ADORA2B,S100A12,PTPRC,PIK3CG,FGF7,C3,CCL5,PLAUR,C5AR1,GPNMB,MMP9,MDFIC,NIBAN1,MAP3K8,FPR1,LCP2,LEP,AREG,IGF1,CD86,CD36,TLR1,TLR4,CD44,TREM2,GREM1,LYN,IL1RN,IL6,HCLS1,NCKAP1L
GO: Biological Process	GO:0006468	protein phosphorylation				4.75e-08	0.000271	7.64e-07	7.05e-06	62	1776	EREG,INHBA,RASSF2,STK17B,CD300A,CLEC7A,PTPN22,TLR7,CHI3L1,SAMSN1,ITGB2,PTGS2,ZEB2,ADCY7,ITK,FABP4,TWIST1,NOD2,ADORA2B,S100A12,PTPRC,PIK3CG,BTK,CCL2,FGF7,C3,CCL5,PLAUR,CCL8,CCL11,C5AR1,GPNMB,FGR,MMP9,RAC2,LILRB4,MDFIC,NIBAN1,MAP3K8,FPR1,APOE,LCP2,LEP,AREG,IGF1,CD86,LOX,CD36,TLR1,TLR2,TLR4,CD44,TREM2,IRAK3,DUSP10,GREM1,LYN,IL1RN,HCK,IL6,HCLS1,NCKAP1L
GO: Biological Process	GO:0002709	regulation of T cell mediated immunity				4.91e-08	0.00028	7.88e-07	7.27e-06	12	91	NOD2,CCR2,CLC,PTPRC,FCGR2B,SASH3,CCL20,LILRB4,NLRP3,TNFRSF1B,IL6,IL7R
GO: Biological Process	GO:0050679	positive regulation of epithelial cell proliferation				4.97e-08	0.000283	7.95e-07	7.34e-06	19	245	IL10,HMOX1,ITGA4,TWIST1,NRP2,NOD2,ADORA2B,SCG2,CCL2,FGF7,CCL5,CCL11,C5AR1,MMP12,AREG,IGF1,EGR3,TLR4,IL6
GO: Biological Process	GO:0055080	cation homeostasis				5.12e-08	0.000291	8.15e-07	7.52e-06	38	840	SLAMF8,CD52,CYBRD1,MYO5A,TCIRG1,HMOX1,PTGDR,CCR2,S100A8,S100A9,PTPRC,CLIC2,PIK3CG,CXCL9,KCNMA1,CCL2,CCR1,C3AR1,CCL5,GNA15,CCL7,CCR5,CCL8,CCL11,C5AR1,PLN,STEAP1,GPR18,GPR65,SLC31A2,FPR1,FPR3,CCRL2,APOE,SLC1A3,CD36,LYN,CXCR2
GO: Biological Process	GO:0055074	calcium ion homeostasis				5.12e-08	0.000292	8.15e-07	7.52e-06	29	535	CD52,MYO5A,TCIRG1,PTGDR,CCR2,PTPRC,CLIC2,PIK3CG,CXCL9,CCL2,CCR1,C3AR1,CCL5,GNA15,CCL7,CCR5,CCL8,CCL11,C5AR1,PLN,GPR18,GPR65,FPR1,FPR3,CCRL2,APOE,CD36,LYN,CXCR2
GO: Biological Process	GO:0032651	regulation of interleukin-1 beta production				5.16e-08	0.000294	8.18e-07	7.54e-06	13	110	ACP5,CLEC7A,NOD2,TYROBP,MNDA,LILRB4,CASP1,NLRP3,IGF1,TLR2,TLR4,TREM2,IL6
GO: Biological Process	GO:0060548	negative regulation of cell death				5.24e-08	0.000299	8.29e-07	7.65e-06	48	1214	IL10,CLEC5A,SERPINF1,GATA6,EVI2B,BCL2A1,HMOX1,PTGS2,PLAC8,TWIST1,LAPTM5,NOD2,CCN4,FCER1G,VNN1,PIK3CG,SCG2,AHR,CCL2,CCL5,PLAUR,C5AR1,GPNMB,MMP9,COMP,ANXA1,NR4A2,BIRC3,APOE,LEP,LGALS3,ZFPM2,IGF1,EGR3,CD28,SERPINE1,CD44,TREM2,LAMP3,GREM1,TNFRSF1B,IL1RN,HCK,IL6,HCLS1,IL7R,CXCR2,NCKAP1L
GO: Biological Process	GO:0071622	regulation of granulocyte chemotaxis				5.66e-08	0.000323	8.91e-07	8.22e-06	10	59	NOD2,CCL2,C3AR1,CCL5,C5AR1,RAC2,SELL,CXCL8,CXCR2,NCKAP1L
GO: Biological Process	GO:0061756	leukocyte adhesion to vascular endothelial cell				5.66e-08	0.000323	8.91e-07	8.22e-06	10	59	ITGA4,PTAFR,ITGAM,ITGB2,CCR2,ALOX5,SELE,SELL,LEP,IL6
GO: Biological Process	GO:0009615	response to virus				5.85e-08	0.000333	9.18e-07	8.47e-06	24	385	PTPN22,TLR7,ITGAX,TRIM22,FGL2,IFIH1,PTPRC,MICB,CXCL9,CCL4,CCL5,CCL8,CCL11,FGR,MMP12,IL33,BIRC3,SAMHD1,NLRP3,RNASE2,RNASE6,CD86,IRAK3,IL6
GO: Biological Process	GO:0002573	myeloid leukocyte differentiation				6.03e-08	0.000344	9.44e-07	8.71e-06	19	248	INHBA,RASSF2,TCIRG1,EVI2B,DCSTAMP,ITGAM,CCN4,TYROBP,FCER1G,CCR1,CCL5,MMP9,LILRB4,GPR183,TLR2,TLR4,TREM2,LYN,HCLS1
GO: Biological Process	GO:0034612	response to tumor necrosis factor				6.22e-08	0.000354	9.71e-07	8.95e-06	22	329	GBP2,CHI3L1,DCSTAMP,FABP4,LAPTM5,CCL2,CCL4,CCL5,CCL7,CCL8,CCL11,CCL18,CCL20,COL1A1,SELE,CASP1,BIRC3,POSTN,CD14,TNFRSF1B,IL6,CXCL8
GO: Biological Process	GO:0060191	regulation of lipase activity				6.27e-08	0.000357	9.76e-07	9e-06	17	199	PTAFR,ITK,HRH1,C3AR1,CCL5,GNA15,C5AR1,PLEK,SELE,GPR18,GPR65,ANXA1,FPR1,FPR3,APOC1,CD86,CXCR2
GO: Biological Process	GO:0019725	cellular homeostasis				6.84e-08	0.00039	1.06e-06	9.8e-06	45	1109	CYBB,SLAMF8,CD52,CYBRD1,MYO5A,SERPINF1,TCIRG1,NCF2,NCF4,HMOX1,PTGDR,CCR2,S100A8,S100A9,PTPRC,CLIC2,PIK3CG,CXCL9,KCNMA1,CCL2,CCR1,C3AR1,CCL5,GNA15,CCL7,CCR5,CCL8,CCL11,C5AR1,PLN,RAC2,GPR18,GPR65,SLC31A2,FPR1,FPR3,CCRL2,APOE,SLC1A3,IGF1,LOX,CD36,LYN,IL6,CXCR2
GO: Biological Process	GO:0002456	T cell mediated immunity				6.96e-08	0.000396	1.08e-06	9.94e-06	14	133	NOD2,CCR2,CLC,PTPRC,FCGR2B,SASH3,CCL20,LILRB4,NLRP3,GZMB,CRTAM,TNFRSF1B,IL6,IL7R
GO: Biological Process	GO:0031341	regulation of cell killing				7.13e-08	0.000406	1.1e-06	1.02e-05	13	113	IL10,CFH,CLEC7A,ITGAM,TYROBP,PTPRC,FCGR2B,CCL2,CXCL6,VAV1,LEP,CRTAM,IL7R
GO: Biological Process	GO:0035987	endodermal cell differentiation				7.17e-08	0.000409	1.1e-06	1.02e-05	9	46	INHBA,GATA6,ITGA4,ITGB2,MMP2,MMP9,COL5A1,COL8A1,COL11A1
GO: Biological Process	GO:0014070	response to organic cyclic compound				7.57e-08	0.000431	1.16e-06	1.07e-05	43	1037	CYBB,IL10,PDE4B,INHBA,CES1,SERPINF1,P2RY13,NCF2,PTAFR,NOD2,IFIH1,PIK3CG,KCNMA1,AHR,HRH1,CCL2,CCL5,GNA15,CCR5,MMP2,PLN,COL1A1,SELL,DPYD,ANXA1,FOLR2,CASP1,SLC1A3,AQP9,LEP,NLRP3,AREG,POSTN,THBD,IGF1,LOX,CD36,TLR2,IRAK3,LUM,LYN,IL1RN,IL6
GO: Biological Process	GO:0046635	positive regulation of alpha-beta T cell activation				7.69e-08	0.000438	1.18e-06	1.08e-05	11	77	PTPN22,CCR2,PTPRC,SASH3,LILRB4,ANXA1,NLRP3,CD28,CD86,IL6,NCKAP1L
GO: Biological Process	GO:0043269	regulation of ion transport				7.7e-08	0.000438	1.18e-06	1.08e-05	56	1550	CYBB,PDE4B,MYO5A,CES1,CD300A,TCIRG1,PTPN22,PTAFR,ITGAM,ITGB2,GEM,PTGS2,TWIST1,CD84,CCR2,S100A8,ADORA2B,KCNE4,CLIC2,PIK3CG,CXCL9,KCNMA1,AHR,CCL2,C3,CCR1,CCL4,CCL5,MMP9,PLN,ALOX5,PLTP,RAC2,MDFIC,SFRP4,SLC31A2,ANXA1,APOC1,APOE,LCP1,LEP,LGALS3,ABCG1,IGF1,CD36,TLR2,GZMB,TLR4,SERPINE1,AOC3,TREM2,LYN,IL1RN,CTSS,IL6,HCLS1
GO: Biological Process	GO:0046629	gamma-delta T cell activation				7.85e-08	0.000447	1.2e-06	1.1e-05	7	23	ITK,NOD2,PTPRC,MICB,GPR18,EGR3,NCKAP1L
GO: Biological Process	GO:1903038	negative regulation of leukocyte cell-cell adhesion				7.98e-08	0.000455	1.21e-06	1.12e-05	15	156	IL10,CD300A,VSIG4,PTPN22,FGL2,LAPTM5,FCGR2B,GPNMB,LILRB4,ANXA1,CR1,LGALS3,CD86,CRTAM,CD44
GO: Biological Process	GO:0050673	epithelial cell proliferation				8.25e-08	0.00047	1.25e-06	1.15e-05	28	515	IL10,EREG,SERPINF1,HMOX1,ITGA4,TWIST1,NRP2,NOD2,ADORA2B,FAP,SCG2,CCL2,FGF7,CCL5,CCL11,C5AR1,MMP12,ALOX5,COL8A1,COL8A2,APOE,LEP,AREG,IGF1,EGR3,TLR4,DUSP10,IL6
GO: Biological Process	GO:0050853	B cell receptor signaling pathway				8.41e-08	0.000479	1.27e-06	1.17e-05	14	135	CD300A,PTPN22,ITK,PTPRC,FCGR2B,BTK,LPXN,MNDA,LAT2,IGKC,IGLC1,TRBC1,LYN,NCKAP1L
GO: Biological Process	GO:0150062	complement-mediated synapse pruning				8.59e-08	0.000489	1.29e-06	1.19e-05	4	4	ITGAM,C1QA,C3,TREM2
GO: Biological Process	GO:0002720	positive regulation of cytokine production involved in immune response				9.26e-08	0.000527	1.39e-06	1.28e-05	10	62	CLEC7A,LAPTM5,NOD2,FCER1G,SASH3,NLRP3,CD36,TLR2,TLR4,IL6
GO: Biological Process	GO:0010562	positive regulation of phosphorus metabolic process				9.33e-08	0.000532	1.4e-06	1.29e-05	45	1121	EREG,INHBA,RASSF2,CD300A,CLEC7A,CHI3L1,PTAFR,PTGS2,ZEB2,ADCY7,NOD2,ADORA2B,S100A12,PTPRC,PIK3CG,HRH1,FGF7,C3,CCL5,PLAUR,C5AR1,GPNMB,FGR,PLEK,MMP9,MDFIC,NIBAN1,MAP3K8,FPR1,LCP2,LEP,AREG,IGF1,CD86,CD36,TLR1,TLR4,CD44,TREM2,GREM1,LYN,IL1RN,IL6,HCLS1,NCKAP1L
GO: Biological Process	GO:0045937	positive regulation of phosphate metabolic process				9.33e-08	0.000532	1.4e-06	1.29e-05	45	1121	EREG,INHBA,RASSF2,CD300A,CLEC7A,CHI3L1,PTAFR,PTGS2,ZEB2,ADCY7,NOD2,ADORA2B,S100A12,PTPRC,PIK3CG,HRH1,FGF7,C3,CCL5,PLAUR,C5AR1,GPNMB,FGR,PLEK,MMP9,MDFIC,NIBAN1,MAP3K8,FPR1,LCP2,LEP,AREG,IGF1,CD86,CD36,TLR1,TLR4,CD44,TREM2,GREM1,LYN,IL1RN,IL6,HCLS1,NCKAP1L
GO: Biological Process	GO:0050801	ion homeostasis				9.56e-08	0.000544	1.43e-06	1.32e-05	39	897	SLAMF8,CD52,CYBRD1,MYO5A,TCIRG1,HMOX1,PTGDR,CCR2,S100A8,S100A9,PTPRC,CLIC2,PIK3CG,CXCL9,KCNMA1,CCL2,CCR1,C3AR1,CCL5,GNA15,CCL7,CCR5,CCL8,CCL11,C5AR1,PLN,STEAP1,SFRP4,GPR18,GPR65,SLC31A2,FPR1,FPR3,CCRL2,APOE,SLC1A3,CD36,LYN,CXCR2
GO: Biological Process	GO:0051091	positive regulation of DNA-binding transcription factor activity				1e-07	0.00057	1.49e-06	1.37e-05	31	618	IL10,RASSF2,PTPN22,TLR7,HMOX1,LY96,CHI3L1,ITGB2,TRIM22,LAPTM5,NOD2,CD84,S100A8,S100A9,S100A12,BTK,LILRB4,CASP1,BIRC3,NLRP3,CD14,CD86,CD36,TLR1,TLR2,TLR4,TREM2,IRAK3,GREM1,IL6,HCLS1
GO: Biological Process	GO:0050766	positive regulation of phagocytosis				1.01e-07	0.000575	1.5e-06	1.38e-05	11	79	CLEC7A,NOD2,PTPRC,FCER1G,FCGR2B,CCL2,C3,DOCK2,CD36,TREM2,NCKAP1L
GO: Biological Process	GO:0045428	regulation of nitric oxide biosynthetic process				1.15e-07	0.000656	1.71e-06	1.57e-05	11	80	IL10,ACP5,CLEC7A,ITGB2,PTGS2,HRH1,IGF1,CD36,TLR2,TLR4,IL6
GO: Biological Process	GO:0006956	complement activation				1.4e-07	0.000796	2.06e-06	1.9e-05	16	186	IL10,CFH,VSIG4,CFD,FCN1,C1QA,C1QB,C1R,C1S,C3,C3AR1,C5AR1,CR1,IGKC,IGLC1,TRBC1
GO: Biological Process	GO:0001503	ossification				1.47e-07	0.000839	2.16e-06	2e-05	26	466	RASSF2,ASPN,CLEC5A,ACP5,TCIRG1,PTGS2,TWIST1,CCN4,AHR,CCR1,MMP2,FGR,MMP9,ALOX5,COL1A1,COL1A2,COL11A1,COMP,OMD,LEP,AREG,IGF1,LOX,VCAN,GREM1,IL6
GO: Biological Process	GO:0002704	negative regulation of leukocyte mediated immunity				1.47e-07	0.000839	2.16e-06	2e-05	10	65	CD300A,HMOX1,NOD2,CD84,CCR2,PTPRC,FCGR2B,LILRB4,CR1,IL7R
GO: Biological Process	GO:0032729	positive regulation of interferon-gamma production				1.49e-07	0.000851	2.17e-06	2e-05	11	82	PDE4B,CLEC7A,PTPN22,TLR7,CCR2,SASH3,IRF8,CD2,CD14,TLR4,CRTAM
GO: Biological Process	GO:0080164	regulation of nitric oxide metabolic process				1.49e-07	0.000851	2.17e-06	2e-05	11	82	IL10,ACP5,CLEC7A,ITGB2,PTGS2,HRH1,IGF1,CD36,TLR2,TLR4,IL6
GO: Biological Process	GO:1904996	positive regulation of leukocyte adhesion to vascular endothelial cell				1.5e-07	0.000851	2.17e-06	2e-05	7	25	ITGA4,PTAFR,ITGB2,CCR2,ALOX5,SELE,IL6
GO: Biological Process	GO:0002544	chronic inflammatory response				1.5e-07	0.000851	2.17e-06	2e-05	7	25	IL10,S100A8,ADORA2B,S100A9,VNN1,CCL5,CCL11
GO: Biological Process	GO:0090022	regulation of neutrophil chemotaxis				1.7e-07	0.00097	2.46e-06	2.27e-05	8	37	NOD2,C3AR1,C5AR1,RAC2,SELL,CXCL8,CXCR2,NCKAP1L
GO: Biological Process	GO:0002724	regulation of T cell cytokine production				1.7e-07	0.00097	2.46e-06	2.27e-05	8	37	CCR2,CLC,SASH3,CCL20,LILRB4,NLRP3,TNFRSF1B,IL6
GO: Biological Process	GO:0003013	circulatory system process				1.83e-07	0.00104	2.64e-06	2.44e-05	33	704	PDE4B,CES1,SLCO2B1,NCF2,HMOX1,PTAFR,PTGS2,MEOX2,ADORA2B,ADORA3,KCNE4,CLIC2,PIK3CG,KCNMA1,AHR,HRH1,C3AR1,MMP2,PLN,ALOX5,COL1A2,COMP,CPA3,APOE,SLC1A3,OLR1,LEP,SLC2A3,POSTN,CD36,AOC3,CTSZ,CXCR2
GO: Biological Process	GO:0042327	positive regulation of phosphorylation				1.86e-07	0.00106	2.67e-06	2.46e-05	42	1033	EREG,INHBA,RASSF2,CD300A,CLEC7A,CHI3L1,PTGS2,ZEB2,ADCY7,NOD2,ADORA2B,S100A12,PTPRC,PIK3CG,FGF7,C3,CCL5,PLAUR,C5AR1,GPNMB,FGR,MMP9,MDFIC,NIBAN1,MAP3K8,FPR1,LCP2,LEP,AREG,IGF1,CD86,CD36,TLR1,TLR4,CD44,TREM2,GREM1,LYN,IL1RN,IL6,HCLS1,NCKAP1L
GO: Biological Process	GO:0098581	detection of external biotic stimulus				2.02e-07	0.00115	2.89e-06	2.67e-05	7	26	CLEC7A,LY96,NOD2,TLR1,TLR2,TLR4,TREM2
GO: Biological Process	GO:0032743	positive regulation of interleukin-2 production				2.13e-07	0.00121	3.04e-06	2.81e-05	8	38	PDE4B,CLEC7A,CCR2,PTPRC,SASH3,ANXA1,CD28,CD86
GO: Biological Process	GO:0043277	apoptotic cell clearance				2.19e-07	0.00125	3.12e-06	2.88e-05	9	52	CCR2,TYROBP,FCN1,CCL2,C3,RAC2,ANXA1,CD36,TREM2
GO: Biological Process	GO:0032655	regulation of interleukin-12 production				2.29e-07	0.0013	3.26e-06	3e-05	10	68	IL10,ACP5,CLEC7A,LAPTM5,NOD2,IRF8,CD36,TLR2,TLR4,IRAK3
GO: Biological Process	GO:0070665	positive regulation of leukocyte proliferation				2.29e-07	0.00131	3.26e-06	3e-05	15	169	PTPN22,CCR2,PTPRC,SASH3,CCL5,ANXA1,GPR183,LEP,IGF1,CD28,CD86,TLR4,LYN,IL6,NCKAP1L
GO: Biological Process	GO:0051090	regulation of DNA-binding transcription factor activity				2.31e-07	0.00131	3.27e-06	3.02e-05	35	782	IL10,RASSF2,PTPN22,TLR7,HMOX1,LY96,CHI3L1,ITGB2,TRIM22,TWIST1,LAPTM5,NOD2,CD84,S100A8,S100A9,S100A12,ADORA3,BTK,LILRB4,SFRP4,CASP1,BIRC3,NLRP3,CD14,CD86,CD36,TLR1,TLR2,TLR4,TREM2,IRAK3,GREM1,HCK,IL6,HCLS1
GO: Biological Process	GO:0030168	platelet activation				2.48e-07	0.00141	3.5e-06	3.23e-05	15	170	CFH,FCER1G,PIK3CG,GNA15,PLEK,VAV1,COL1A1,COL1A2,COMP,APOE,LCP2,THBD,TLR4,LYN,IL6
GO: Biological Process	GO:0050731	positive regulation of peptidyl-tyrosine phosphorylation				2.5e-07	0.00143	3.53e-06	3.26e-05	17	219	EREG,CLEC7A,NOD2,PTPRC,FGF7,CCL5,LEP,AREG,IGF1,CD36,TLR4,CD44,TREM2,GREM1,LYN,IL6,HCLS1
GO: Biological Process	GO:0050678	regulation of epithelial cell proliferation				2.57e-07	0.00146	3.61e-06	3.33e-05	25	448	IL10,EREG,SERPINF1,HMOX1,ITGA4,TWIST1,NRP2,NOD2,ADORA2B,SCG2,CCL2,FGF7,CCL5,CCL11,C5AR1,MMP12,ALOX5,APOE,LEP,AREG,IGF1,EGR3,TLR4,DUSP10,IL6
GO: Biological Process	GO:1902622	regulation of neutrophil migration				2.6e-07	0.00148	3.64e-06	3.36e-05	9	53	SLAMF8,NOD2,C3AR1,C5AR1,RAC2,SELL,CXCL8,CXCR2,NCKAP1L
GO: Biological Process	GO:0032732	positive regulation of interleukin-1 production				2.63e-07	0.0015	3.69e-06	3.4e-05	10	69	CLEC7A,NOD2,TYROBP,CCL20,MNDA,CASP1,NLRP3,TLR2,TLR4,IL6
GO: Biological Process	GO:1900274	regulation of phospholipase C activity				2.66e-07	0.00151	3.71e-06	3.42e-05	14	148	PTAFR,ITK,HRH1,C3AR1,GNA15,C5AR1,PLEK,SELE,GPR18,GPR65,FPR1,FPR3,CD86,CXCR2
GO: Biological Process	GO:0007204	positive regulation of cytosolic calcium ion concentration				2.83e-07	0.00161	3.94e-06	3.64e-05	22	359	CD52,MYO5A,PTGDR,CCR2,PTPRC,CLIC2,PIK3CG,CXCL9,CCR1,C3AR1,GNA15,CCR5,C5AR1,PLN,GPR18,GPR65,FPR1,FPR3,CCRL2,CD36,LYN,CXCR2
GO: Biological Process	GO:0007186	G protein-coupled receptor signaling pathway				2.91e-07	0.00166	4.04e-06	3.72e-05	51	1407	EREG,PDE4B,P2RY13,PTAFR,ADGRE2,PTGDR,ADCY7,CCR2,ADORA2B,ADORA3,FCN1,PIK3CG,BTK,CXCL9,HRH1,CCL2,C3,CCR1,P2RY14,C3AR1,CCL4,CCL5,GNA15,CCL7,CCR5,CCL8,CCL11,GPR171,C5AR1,CCL18,CCL20,PLEK,CXCL6,PLN,VAV1,RAC2,GPR18,GPR65,ANXA1,FPR1,FPR3,CCRL2,GPR183,APOE,PPBP,CXCL2,CXCL3,RGS1,AREG,CXCL8,CXCR2
GO: Biological Process	GO:0002833	positive regulation of response to biotic stimulus				3.04e-07	0.00173	4.21e-06	3.88e-05	19	275	EREG,LY96,NOD2,TYROBP,FCER1G,CLEC4A,FCN1,CCL5,MMP2,CLEC10A,MMP12,LY86,MNDA,VAV1,TLR2,TLR4,CRTAM,LYN,HCK
GO: Biological Process	GO:0032270	positive regulation of cellular protein metabolic process				3.23e-07	0.00184	4.45e-06	4.11e-05	56	1619	EREG,INHBA,RASSF2,CD300A,CLEC7A,PTPN22,CHI3L1,PTAFR,PTGS2,ZEB2,ADCY7,LAPTM5,NOD2,PRR16,S100A8,ADORA2B,S100A9,S100A12,PTPRC,PIK3CG,FGF7,C3,CCL5,PLAUR,C5AR1,GPNMB,MMP9,IL33,MDFIC,NIBAN1,MAP3K8,FPR1,CASP1,BIRC3,APOE,LCP2,CR1,LEP,NLRP3,AREG,IGF1,CD28,CD86,CD36,TLR1,TLR4,CD44,TREM2,GREM1,TNFRSF1B,LYN,CTSD,IL1RN,IL6,HCLS1,NCKAP1L
GO: Biological Process	GO:0048771	tissue remodeling				3.24e-07	0.00185	4.45e-06	4.11e-05	17	223	RASSF2,ACP5,TCIRG1,DCSTAMP,ITGA4,CCR2,AHR,GPNMB,MMP2,MMP9,RAC2,LEP,LIPA,IGF1,GREM1,CTSS,IL6
GO: Biological Process	GO:0097242	amyloid-beta clearance				3.24e-07	0.00185	4.45e-06	4.11e-05	8	40	ITGAM,ITGB2,C3,C5AR1,APOE,MSR1,CD36,TREM2
GO: Biological Process	GO:0071356	cellular response to tumor necrosis factor				3.24e-07	0.00185	4.45e-06	4.11e-05	20	304	GBP2,CHI3L1,DCSTAMP,FABP4,LAPTM5,CCL2,CCL4,CCL5,CCL7,CCL8,CCL11,CCL18,CCL20,COL1A1,CASP1,BIRC3,POSTN,TNFRSF1B,IL6,CXCL8
GO: Biological Process	GO:0090130	tissue migration				3.27e-07	0.00186	4.46e-06	4.12e-05	23	392	SERPINF1,ACTG2,HMOX1,ITGB2,PTGS2,ZEB2,NRP2,MEOX2,ADORA2B,FAP,SRPX2,PIK3CG,SCG2,LPXN,FGF7,MMP9,ANXA1,APOE,IGF1,EGR3,SERPINE1,DUSP10,GREM1
GO: Biological Process	GO:0051247	positive regulation of protein metabolic process				3.27e-07	0.00186	4.46e-06	4.12e-05	58	1704	EREG,INHBA,RASSF2,CD300A,CLEC7A,PTPN22,CHI3L1,PTAFR,PTGS2,ZEB2,ADCY7,LAPTM5,NOD2,PRR16,S100A8,ADORA2B,S100A9,S100A12,PTPRC,PIK3CG,FGF7,C3,CCL5,PLAUR,C5AR1,GPNMB,MMP9,IL33,MDFIC,NIBAN1,MAP3K8,FPR1,CASP1,BIRC3,APOE,LCP2,CR1,LEP,NLRP3,AREG,ABCG1,IGF1,CD28,CD86,CD36,TLR1,TLR4,CD44,TREM2,GREM1,TNFRSF1B,LYN,CTSD,IL1RN,IL6,HCLS1,SOAT1,NCKAP1L
GO: Biological Process	GO:0070391	response to lipoteichoic acid				3.35e-07	0.00191	4.56e-06	4.21e-05	5	10	CD14,CD36,TLR2,TLR4,TREM2
GO: Biological Process	GO:0071223	cellular response to lipoteichoic acid				3.35e-07	0.00191	4.56e-06	4.21e-05	5	10	CD14,CD36,TLR2,TLR4,TREM2
GO: Biological Process	GO:0006925	inflammatory cell apoptotic process				3.52e-07	0.00201	4.78e-06	4.41e-05	7	28	ITGAM,NOD2,CCL5,ANXA1,CD44,IL6,CXCR2
GO: Biological Process	GO:1904645	response to amyloid-beta				3.62e-07	0.00206	4.89e-06	4.51e-05	9	55	ITGA4,FCGR2B,MMP2,MMP9,MMP12,IGF1,CD36,TLR4,TREM2
GO: Biological Process	GO:0055082	cellular chemical homeostasis				3.74e-07	0.00213	5.04e-06	4.65e-05	39	946	SLAMF8,CD52,CYBRD1,MYO5A,SERPINF1,TCIRG1,HMOX1,PTGDR,CCR2,S100A8,S100A9,PTPRC,CLIC2,PIK3CG,CXCL9,KCNMA1,CCL2,CCR1,C3AR1,CCL5,GNA15,CCL7,CCR5,CCL8,CCL11,C5AR1,PLN,GPR18,GPR65,SLC31A2,FPR1,FPR3,CCRL2,APOE,SLC1A3,IGF1,CD36,LYN,CXCR2
GO: Biological Process	GO:0008015	blood circulation				3.75e-07	0.00213	5.04e-06	4.65e-05	30	622	PDE4B,CES1,NCF2,HMOX1,PTAFR,PTGS2,MEOX2,ADORA2B,ADORA3,KCNE4,CLIC2,PIK3CG,KCNMA1,AHR,HRH1,C3AR1,MMP2,PLN,ALOX5,COL1A2,COMP,CPA3,APOE,OLR1,LEP,POSTN,CD36,AOC3,CTSZ,CXCR2
GO: Biological Process	GO:0150077	regulation of neuroinflammatory response				3.97e-07	0.00226	5.33e-06	4.92e-05	8	41	PTGS2,PTPRC,MMP9,IL33,IGF1,TREM2,TNFRSF1B,IL6
GO: Biological Process	GO:0050671	positive regulation of lymphocyte proliferation				4e-07	0.00228	5.36e-06	4.95e-05	14	153	PTPN22,CCR2,PTPRC,SASH3,CCL5,ANXA1,GPR183,LEP,IGF1,CD28,CD86,TLR4,IL6,NCKAP1L
GO: Biological Process	GO:0051051	negative regulation of transport				4.4e-07	0.0025	5.88e-06	5.42e-05	28	559	INHBA,CD300A,HMOX1,GEM,PTGS2,TWIST1,CD84,CCR2,KCNE4,TRAT1,FCGR2B,CLIC2,AHR,MMP9,PLN,MDFIC,SFRP4,ANXA1,APOC1,APOE,LEP,LGALS3,MCTP1,CD36,TLR2,TNFRSF1B,IL1RN,IL6
GO: Biological Process	GO:0090023	positive regulation of neutrophil chemotaxis				4.58e-07	0.00261	6.1e-06	5.63e-05	7	29	C3AR1,C5AR1,RAC2,SELL,CXCL8,CXCR2,NCKAP1L
GO: Biological Process	GO:0032946	positive regulation of mononuclear cell proliferation				4.69e-07	0.00267	6.24e-06	5.76e-05	14	155	PTPN22,CCR2,PTPRC,SASH3,CCL5,ANXA1,GPR183,LEP,IGF1,CD28,CD86,TLR4,IL6,NCKAP1L
GO: Biological Process	GO:0042092	type 2 immune response				4.83e-07	0.00275	6.41e-06	5.92e-05	8	42	IL10,NOD2,CCR2,IL33,ANXA1,NLRP3,CD86,IL6
GO: Biological Process	GO:0030282	bone mineralization				4.88e-07	0.00278	6.44e-06	5.94e-05	13	133	ASPN,PTGS2,TWIST1,CCR1,FGR,ALOX5,COL1A2,COMP,OMD,LEP,IGF1,LOX,GREM1
GO: Biological Process	GO:0001909	leukocyte mediated cytotoxicity				4.88e-07	0.00278	6.44e-06	5.94e-05	13	133	ITGAM,TYROBP,PTPRC,FCGR2B,CCL2,CXCL6,VAV1,LEP,GZMB,CRTAM,TREM1,SLAMF7,IL7R
GO: Biological Process	GO:0030099	myeloid cell differentiation				4.89e-07	0.00279	6.45e-06	5.95e-05	26	496	INHBA,RASSF2,CLEC5A,TCIRG1,EVI2B,DCSTAMP,ITGAM,CCN4,TYROBP,FCER1G,CCR1,CCL5,GPR171,MMP9,LILRB4,IRF8,GPR183,LEP,LGALS3,LOX,TLR2,TLR4,TREM2,LYN,HCLS1,NCKAP1L
GO: Biological Process	GO:0062207	regulation of pattern recognition receptor signaling pathway				4.99e-07	0.00284	6.56e-06	6.05e-05	12	112	CD300A,PTPN22,LY96,NOD2,BIRC3,CD14,CD36,TLR1,TLR2,TLR4,IRAK3,LYN
GO: Biological Process	GO:0050878	regulation of body fluid levels				5.07e-07	0.00289	6.65e-06	6.14e-05	28	563	CFH,GATA6,HPSE,ADCY7,S100A9,FAP,FCER1G,PIK3CG,KCNMA1,C3,GNA15,PLAUR,PLEK,VAV1,COL1A1,COL1A2,COMP,APOE,LCP2,PAPSS2,ZFPM2,MMRN1,THBD,CD36,TLR4,SERPINE1,LYN,IL6
GO: Biological Process	GO:0050854	regulation of antigen receptor-mediated signaling pathway				5.16e-07	0.00294	6.75e-06	6.23e-05	10	74	CD300A,PTPN22,LAPTM5,PTPRC,TRAT1,FCGR2B,LPXN,LILRB4,LGALS3,LYN
GO: Biological Process	GO:0140546	defense response to symbiont				5.53e-07	0.00315	7.21e-06	6.65e-05	19	286	PTPN22,TLR7,ITGAX,TRIM22,FGL2,IFIH1,PTPRC,MICB,CXCL9,CCL5,MMP12,IL33,BIRC3,SAMHD1,NLRP3,RNASE2,RNASE6,CD86,IL6
GO: Biological Process	GO:0051607	defense response to virus				5.53e-07	0.00315	7.21e-06	6.65e-05	19	286	PTPN22,TLR7,ITGAX,TRIM22,FGL2,IFIH1,PTPRC,MICB,CXCL9,CCL5,MMP12,IL33,BIRC3,SAMHD1,NLRP3,RNASE2,RNASE6,CD86,IL6
GO: Biological Process	GO:0045089	positive regulation of innate immune response				5.66e-07	0.00322	7.36e-06	6.79e-05	17	232	EREG,NOD2,TYROBP,FCER1G,CLEC4A,FCN1,CCL5,MMP2,CLEC10A,MMP12,MNDA,VAV1,TLR2,TLR4,CRTAM,LYN,HCK
GO: Biological Process	GO:0010575	positive regulation of vascular endothelial growth factor production				5.88e-07	0.00335	7.63e-06	7.04e-05	7	30	HPSE,PTGS2,ADORA2B,C3,C3AR1,C5AR1,IL6
GO: Biological Process	GO:0030183	B cell differentiation				5.93e-07	0.00338	7.67e-06	7.08e-05	14	158	SLAMF8,IL10,INHBA,TCIRG1,ITGA4,PTPRC,FCGR2B,BTK,AHR,DOCK10,GPR183,CR1,IL6,NCKAP1L
GO: Biological Process	GO:0031214	biomineral tissue development				5.98e-07	0.0034	7.72e-06	7.12e-05	15	182	ASPN,TCIRG1,PTGS2,TWIST1,CCR1,FGR,ALOX5,COL1A1,COL1A2,COMP,OMD,LEP,IGF1,LOX,GREM1
GO: Biological Process	GO:0035747	natural killer cell chemotaxis				6.06e-07	0.00345	7.79e-06	7.19e-05	5	11	PIK3CG,CCL2,CCL4,CCL5,CCL7
GO: Biological Process	GO:0002887	negative regulation of myeloid leukocyte mediated immunity				6.06e-07	0.00345	7.79e-06	7.19e-05	5	11	CD300A,HMOX1,CD84,CCR2,FCGR2B
GO: Biological Process	GO:0010518	positive regulation of phospholipase activity				6.4e-07	0.00365	8.21e-06	7.57e-05	14	159	PTAFR,ITK,HRH1,C3AR1,CCL5,GNA15,C5AR1,SELE,GPR18,GPR65,FPR1,FPR3,CD86,CXCR2
GO: Biological Process	GO:0044092	negative regulation of molecular function				6.52e-07	0.00371	8.35e-06	7.7e-05	49	1363	IL10,CD300A,SERPINF1,P2RY13,PTPN22,HMOX1,ITGA4,GEM,PTGS2,ADCY7,FABP4,TWIST1,NOD2,CCR2,ADORA3,KCNE4,PTPRC,CLIC2,AHR,C3,PLAUR,PLEK,MMP9,PLN,LILRB4,SFRP4,RARRES1,ANXA1,APOC1,APOE,CR1,RGS1,NLRP3,LGALS3,IGF1,TIMP2,GZMA,SERPINE1,AOC3,CD44,LAMP3,CSTA,IRAK3,DUSP10,LYN,IL6,CTSZ,NCKAP1L,PHACTR1
GO: Biological Process	GO:0042102	positive regulation of T cell proliferation				6.65e-07	0.00379	8.48e-06	7.82e-05	12	115	PTPN22,CCR2,PTPRC,SASH3,CCL5,ANXA1,LEP,IGF1,CD28,CD86,IL6,NCKAP1L
GO: Biological Process	GO:0007229	integrin-mediated signaling pathway				6.65e-07	0.00379	8.48e-06	7.82e-05	12	115	ITGA4,ITGAM,ITGAX,ITGB2,TYROBP,FCER1G,FGR,PLEK,VAV1,COL16A1,FYB1,HCK
GO: Biological Process	GO:0043069	negative regulation of programmed cell death				6.68e-07	0.0038	8.49e-06	7.83e-05	42	1084	IL10,CLEC5A,GATA6,EVI2B,BCL2A1,HMOX1,PTGS2,PLAC8,TWIST1,LAPTM5,NOD2,FCER1G,VNN1,PIK3CG,SCG2,CCL2,CCL5,PLAUR,C5AR1,MMP9,COMP,ANXA1,NR4A2,BIRC3,APOE,LEP,LGALS3,IGF1,EGR3,CD28,SERPINE1,CD44,TREM2,LAMP3,GREM1,IL1RN,HCK,IL6,HCLS1,IL7R,CXCR2,NCKAP1L
GO: Biological Process	GO:0032731	positive regulation of interleukin-1 beta production				6.73e-07	0.00383	8.53e-06	7.87e-05	9	59	CLEC7A,NOD2,TYROBP,MNDA,CASP1,NLRP3,TLR2,TLR4,IL6
GO: Biological Process	GO:0006809	nitric oxide biosynthetic process				6.84e-07	0.00389	8.65e-06	7.98e-05	11	95	IL10,ACP5,CLEC7A,ITGB2,PTGS2,HRH1,IGF1,CD36,TLR2,TLR4,IL6
GO: Biological Process	GO:0110148	biomineralization				6.87e-07	0.00391	8.68e-06	8.01e-05	15	184	ASPN,TCIRG1,PTGS2,TWIST1,CCR1,FGR,ALOX5,COL1A1,COL1A2,COMP,OMD,LEP,IGF1,LOX,GREM1
GO: Biological Process	GO:0051046	regulation of secretion				7.12e-07	0.00406	8.98e-06	8.28e-05	34	784	MYO5A,INHBA,CES1,CD300A,TCIRG1,HMOX1,PTAFR,ADGRE2,ITGAM,ITGB2,CD84,CCR2,S100A8,ADORA2B,FCER1G,FCGR2B,CCL5,FGR,ALOX5,RAC2,ANXA1,APOE,LEP,LGALS3,ABCG1,IGF1,MCTP1,TLR2,TLR4,TREM2,TNFRSF1B,LYN,IL1RN,IL6
GO: Biological Process	GO:0030316	osteoclast differentiation				7.31e-07	0.00416	9.17e-06	8.46e-05	12	116	RASSF2,TCIRG1,DCSTAMP,CCN4,TYROBP,FCER1G,CCR1,CCL5,LILRB4,GPR183,TLR4,TREM2
GO: Biological Process	GO:0030449	regulation of complement activation				7.31e-07	0.00416	9.17e-06	8.46e-05	12	116	CFH,VSIG4,C1QA,C1QB,C1R,C1S,C3,C3AR1,C5AR1,CR1,IGKC,IGLC1
GO: Biological Process	GO:0072376	protein activation cascade				7.74e-07	0.00441	9.69e-06	8.94e-05	16	211	IL10,CFH,VSIG4,CFD,FCN1,C1QA,C1QB,C1R,C1S,C3,C3AR1,C5AR1,CR1,IGKC,IGLC1,TRBC1
GO: Biological Process	GO:1901222	regulation of NIK/NF-kappaB signaling				8.79e-07	0.00501	1.1e-05	0.000101	12	118	RASSF2,PTPN22,TLR7,LAPTM5,NOD2,NLRP3,CD14,CD86,TLR2,TLR4,TREM2,GREM1
GO: Biological Process	GO:0010631	epithelial cell migration				8.82e-07	0.00503	1.1e-05	0.000101	22	384	SERPINF1,HMOX1,ITGB2,PTGS2,ZEB2,NRP2,MEOX2,ADORA2B,FAP,SRPX2,PIK3CG,SCG2,LPXN,FGF7,MMP9,ANXA1,APOE,IGF1,EGR3,SERPINE1,DUSP10,GREM1
GO: Biological Process	GO:1903530	regulation of secretion by cell				8.84e-07	0.00503	1.1e-05	0.000101	32	719	MYO5A,INHBA,CD300A,TCIRG1,HMOX1,PTAFR,ADGRE2,ITGAM,ITGB2,CD84,CCR2,ADORA2B,FCER1G,FCGR2B,CCL5,FGR,ALOX5,RAC2,ANXA1,APOE,LEP,LGALS3,ABCG1,IGF1,MCTP1,TLR2,TLR4,TREM2,TNFRSF1B,LYN,IL1RN,IL6
GO: Biological Process	GO:0043066	negative regulation of apoptotic process				9.14e-07	0.00521	1.13e-05	0.000105	41	1058	IL10,CLEC5A,GATA6,EVI2B,BCL2A1,HMOX1,PTGS2,PLAC8,TWIST1,NOD2,FCER1G,VNN1,PIK3CG,SCG2,CCL2,CCL5,PLAUR,C5AR1,MMP9,COMP,ANXA1,NR4A2,BIRC3,APOE,LEP,LGALS3,IGF1,EGR3,CD28,SERPINE1,CD44,TREM2,LAMP3,GREM1,IL1RN,HCK,IL6,HCLS1,IL7R,CXCR2,NCKAP1L
GO: Biological Process	GO:0071624	positive regulation of granulocyte chemotaxis				9.44e-07	0.00538	1.17e-05	0.000108	7	32	C3AR1,C5AR1,RAC2,SELL,CXCL8,CXCR2,NCKAP1L
GO: Biological Process	GO:0019882	antigen processing and presentation				9.63e-07	0.00548	1.19e-05	0.00011	17	241	CYBB,HLA-DMA,HLA-DRB4,PTPN22,NCF2,NCF4,FGL2,NOD2,FCER1G,FCGR1B,FCGR2B,CLEC4A,MARCHF1,CD36,TREM2,CTSD,CTSS
GO: Biological Process	GO:0090132	epithelium migration				1e-06	0.00572	1.24e-05	0.000114	22	387	SERPINF1,HMOX1,ITGB2,PTGS2,ZEB2,NRP2,MEOX2,ADORA2B,FAP,SRPX2,PIK3CG,SCG2,LPXN,FGF7,MMP9,ANXA1,APOE,IGF1,EGR3,SERPINE1,DUSP10,GREM1
GO: Biological Process	GO:0032689	negative regulation of interferon-gamma production				1.01e-06	0.00573	1.24e-05	0.000114	8	46	IL10,INHBA,LAPTM5,NOD2,IL33,LILRB4,CR1,TLR4
GO: Biological Process	GO:0001501	skeletal system development				1.01e-06	0.00576	1.24e-05	0.000115	28	583	CFH,RASSF2,ACP5,CHI3L1,TWIST1,CCN4,TYROBP,PTPRC,MMP2,FGR,MMP9,COL1A1,COL1A2,COL10A1,PRRX1,COL11A1,SFRP4,COMP,EPYC,PAPSS2,LEP,LGALS3,IGF1,LOX,VCAN,CD44,GREM1,LUM
GO: Biological Process	GO:0038093	Fc receptor signaling pathway				1.02e-06	0.00581	1.25e-05	0.000115	17	242	ITK,PTPRC,FCER1G,FCGR1B,FCGR2A,FCGR2B,BTK,FGR,VAV1,LAT2,LCP2,CD3G,IGKC,IGLC1,LYN,HCK,NCKAP1L
GO: Biological Process	GO:0001781	neutrophil apoptotic process				1.03e-06	0.00584	1.25e-05	0.000115	5	12	ITGAM,ANXA1,CD44,IL6,CXCR2
GO: Biological Process	GO:0098883	synapse pruning				1.03e-06	0.00584	1.25e-05	0.000115	5	12	ITGAM,C1QA,C1QB,C3,TREM2
GO: Biological Process	GO:0046209	nitric oxide metabolic process				1.04e-06	0.00591	1.26e-05	0.000116	11	99	IL10,ACP5,CLEC7A,ITGB2,PTGS2,HRH1,IGF1,CD36,TLR2,TLR4,IL6
GO: Biological Process	GO:0010574	regulation of vascular endothelial growth factor production				1.04e-06	0.00591	1.26e-05	0.000116	9	62	HPSE,PTGS2,CCR2,ADORA2B,CCL2,C3,C3AR1,C5AR1,IL6
GO: Biological Process	GO:0071495	cellular response to endogenous stimulus				1.04e-06	0.00591	1.26e-05	0.000116	52	1510	CYBB,PDE4B,MYO5A,INHBA,ASPN,SERPINF1,GATA6,TCIRG1,PTPN22,NCF2,ITGA4,PTAFR,PTGDR,ADCY7,NOD2,PTPRE,FCGR2B,PIK3CG,LPXN,AHR,HRH1,CCL2,FGF7,CCL5,GNA15,MMP2,COL1A1,COL1A2,SFRP4,COL16A1,COMP,ANXA1,FOLR2,NR4A2,SLC1A3,AQP9,LEP,NLRP3,POSTN,IGF1,EGR3,LOX,CD36,TLR2,TLR4,SERPINE1,CD44,TREM2,GREM1,LYN,CTSS,CXCL8
GO: Biological Process	GO:0045859	regulation of protein kinase activity				1.09e-06	0.00619	1.31e-05	0.000121	37	911	EREG,RASSF2,CD300A,PTPN22,CHI3L1,ZEB2,ADCY7,FABP4,NOD2,ADORA2B,S100A12,PTPRC,PIK3CG,CCL5,C5AR1,GPNMB,FGR,RAC2,LILRB4,MDFIC,MAP3K8,FPR1,APOE,LCP2,LEP,AREG,IGF1,CD86,TLR1,TLR4,IRAK3,DUSP10,GREM1,LYN,IL1RN,IL6,NCKAP1L
GO: Biological Process	GO:0072593	reactive oxygen species metabolic process				1.12e-06	0.0064	1.36e-05	0.000125	20	329	CYBB,IL10,ACP5,CLEC7A,NCF2,NCF4,ITGAM,ITGB2,PTGS2,TYROBP,HRH1,ALOX5,VAV1,RAC2,LEP,IGF1,CD36,TLR2,TLR4,IL6
GO: Biological Process	GO:0050858	negative regulation of antigen receptor-mediated signaling pathway				1.18e-06	0.00672	1.41e-05	0.00013	7	33	CD300A,PTPN22,LAPTM5,FCGR2B,LPXN,LILRB4,LGALS3
GO: Biological Process	GO:0002828	regulation of type 2 immune response				1.18e-06	0.00672	1.41e-05	0.00013	7	33	NOD2,CCR2,IL33,ANXA1,NLRP3,CD86,IL6
GO: Biological Process	GO:0033032	regulation of myeloid cell apoptotic process				1.18e-06	0.00672	1.41e-05	0.00013	7	33	CLEC5A,NOD2,FCER1G,CCL5,ANXA1,CD44,CXCR2
GO: Biological Process	GO:0050798	activated T cell proliferation				1.19e-06	0.0068	1.41e-05	0.00013	9	63	ITGAM,ITGAX,ITGB2,LAPTM5,CLC,LILRB4,IGF1,CD86,CRTAM
GO: Biological Process	GO:0002889	regulation of immunoglobulin mediated immune response				1.19e-06	0.0068	1.41e-05	0.00013	9	63	IL10,NOD2,PTPRC,FCER1G,FCGR2B,BTK,C3,CR1,CD28
GO: Biological Process	GO:0030199	collagen fibril organization				1.19e-06	0.0068	1.41e-05	0.00013	9	63	COL14A1,COL1A1,COL1A2,COL5A1,COL11A1,COMP,LOX,GREM1,LUM
GO: Biological Process	GO:0090303	positive regulation of wound healing				1.19e-06	0.0068	1.41e-05	0.00013	9	63	CLEC7A,HPSE,CCN4,S100A9,CCL2,ANXA1,THBD,CD36,SERPINE1
GO: Biological Process	GO:0002712	regulation of B cell mediated immunity				1.19e-06	0.0068	1.41e-05	0.00013	9	63	IL10,NOD2,PTPRC,FCER1G,FCGR2B,BTK,C3,CR1,CD28
GO: Biological Process	GO:0022408	negative regulation of cell-cell adhesion				1.19e-06	0.0068	1.41e-05	0.00013	16	218	IL10,CD300A,VSIG4,PTPN22,FGL2,LAPTM5,FCGR2B,GPNMB,LILRB4,ANXA1,CR1,LGALS3,CD86,CRTAM,CD44,IL1RN
GO: Biological Process	GO:0150076	neuroinflammatory response				1.2e-06	0.00681	1.41e-05	0.00013	8	47	PTGS2,PTPRC,MMP9,IL33,IGF1,TREM2,TNFRSF1B,IL6
GO: Biological Process	GO:0010863	positive regulation of phospholipase C activity				1.21e-06	0.00691	1.43e-05	0.000132	13	144	PTAFR,ITK,HRH1,C3AR1,GNA15,C5AR1,SELE,GPR18,GPR65,FPR1,FPR3,CD86,CXCR2
GO: Biological Process	GO:0002761	regulation of myeloid leukocyte differentiation				1.21e-06	0.00691	1.43e-05	0.000132	13	144	INHBA,RASSF2,EVI2B,DCSTAMP,ITGAM,TYROBP,CCR1,CCL5,LILRB4,TLR4,TREM2,LYN,HCLS1
GO: Biological Process	GO:0051235	maintenance of location				1.23e-06	0.00701	1.44e-05	0.000133	21	361	IL10,MYO5A,CES1,S100A8,S100A9,PTPRC,CLIC2,CXCL9,GM2A,C3,CCR5,PLN,APOE,LEP,LGALS3,MSR1,ABCG1,CD36,LYN,IL6,SOAT1
GO: Biological Process	GO:0051897	positive regulation of protein kinase B signaling				1.26e-06	0.00717	1.48e-05	0.000136	15	193	EREG,CHI3L1,HPSE,TRAT1,PIK3CG,FGF7,VAV1,RAC2,LEP,AREG,IGF1,CD28,CD86,IL6,HCLS1
GO: Biological Process	GO:0050852	T cell receptor signaling pathway				1.27e-06	0.00722	1.48e-05	0.000137	16	219	PDE4B,CD300A,HLA-DRB4,PTPN22,ITK,LAPTM5,PTPRC,TRAT1,LILRB4,THEMIS2,LCP2,LGALS3,CD3G,CD28,TRBC1,FYB1
GO: Biological Process	GO:0002821	positive regulation of adaptive immune response				1.37e-06	0.00782	1.6e-05	0.000148	12	123	HLA-DMA,NOD2,CCR2,PTPRC,FCER1G,SASH3,BTK,C3,NLRP3,CD28,CD44,IL6
GO: Biological Process	GO:0031399	regulation of protein modification process				1.39e-06	0.00789	1.61e-05	0.000149	59	1825	EREG,INHBA,RASSF2,CD300A,CLEC7A,PTPN22,TLR7,CHI3L1,SAMSN1,ITGB2,PTGS2,ZEB2,ADCY7,FABP4,TWIST1,LAPTM5,NOD2,ADORA2B,S100A12,PTPRC,PIK3CG,FGF7,C3,CCL5,PLAUR,C5AR1,GPNMB,FGR,MMP9,RAC2,LILRB4,MDFIC,NIBAN1,MAP3K8,FPR1,BIRC3,APOE,LCP2,LEP,AREG,LGALS3,IGF1,CD86,LOX,CD36,VCAN,TLR1,TLR4,CD44,TREM2,IRAK3,DUSP10,GREM1,LYN,IL1RN,IL6,HCLS1,NCKAP1L,PHACTR1
GO: Biological Process	GO:2001057	reactive nitrogen species metabolic process				1.4e-06	0.00798	1.63e-05	0.00015	11	102	IL10,ACP5,CLEC7A,ITGB2,PTGS2,HRH1,IGF1,CD36,TLR2,TLR4,IL6
GO: Biological Process	GO:0061041	regulation of wound healing				1.42e-06	0.00808	1.65e-05	0.000152	13	146	CLEC7A,HPSE,CCN4,S100A9,FAP,CCL2,PLAUR,ALOX5,ANXA1,APOE,THBD,CD36,SERPINE1
GO: Biological Process	GO:0090026	positive regulation of monocyte chemotaxis				1.43e-06	0.00812	1.65e-05	0.000152	6	22	CCR2,CCL2,CCR1,CCL5,PLA2G7,SERPINE1
GO: Biological Process	GO:0051770	positive regulation of nitric-oxide synthase biosynthetic process				1.43e-06	0.00812	1.65e-05	0.000152	6	22	NOD2,CCL2,CCL20,IL33,TLR2,TLR4
GO: Biological Process	GO:0002262	myeloid cell homeostasis				1.43e-06	0.00817	1.65e-05	0.000153	15	195	CFH,PDE4B,INHBA,HMOX1,ITGAM,CCR2,FCER1G,CCL2,ANXA1,CD44,LYN,IL6,HCLS1,CXCR2,NCKAP1L
GO: Biological Process	GO:0061082	myeloid leukocyte cytokine production				1.47e-06	0.00834	1.69e-05	0.000156	7	34	HMOX1,LAPTM5,FCER1G,CD36,TLR2,TLR4,IRAK3
GO: Biological Process	GO:0051924	regulation of calcium ion transport				1.53e-06	0.00869	1.75e-05	0.000162	19	306	PDE4B,MYO5A,PTPN22,GEM,PTGS2,CD84,CLIC2,PIK3CG,CXCL9,AHR,CCL2,CCR1,CCL4,CCL5,PLN,LGALS3,IGF1,SERPINE1,LYN
GO: Biological Process	GO:0031401	positive regulation of protein modification process				1.62e-06	0.00922	1.86e-05	0.000171	44	1202	EREG,INHBA,RASSF2,CD300A,CLEC7A,PTPN22,CHI3L1,PTGS2,ZEB2,ADCY7,LAPTM5,NOD2,ADORA2B,S100A12,PTPRC,PIK3CG,FGF7,C3,CCL5,PLAUR,C5AR1,GPNMB,MMP9,MDFIC,NIBAN1,MAP3K8,FPR1,BIRC3,LCP2,LEP,AREG,IGF1,CD86,CD36,TLR1,TLR4,CD44,TREM2,GREM1,LYN,IL1RN,IL6,HCLS1,NCKAP1L
GO: Biological Process	GO:0043301	negative regulation of leukocyte degranulation				1.64e-06	0.00935	1.87e-05	0.000173	5	13	CD300A,HMOX1,CD84,CCR2,FCGR2B
GO: Biological Process	GO:0002430	complement receptor mediated signaling pathway				1.64e-06	0.00935	1.87e-05	0.000173	5	13	C3AR1,C5AR1,FPR1,FPR3,CR1
GO: Biological Process	GO:0002369	T cell cytokine production				1.66e-06	0.00947	1.89e-05	0.000174	8	49	CCR2,CLC,SASH3,CCL20,LILRB4,NLRP3,TNFRSF1B,IL6
GO: Biological Process	GO:0030574	collagen catabolic process				1.66e-06	0.00947	1.89e-05	0.000174	8	49	FAP,MMP1,MMP2,MMP9,MMP12,COL15A1,CTSD,CTSS
GO: Biological Process	GO:0060193	positive regulation of lipase activity				1.77e-06	0.0101	2e-05	0.000185	14	173	PTAFR,ITK,HRH1,C3AR1,CCL5,GNA15,C5AR1,SELE,GPR18,GPR65,FPR1,FPR3,CD86,CXCR2
GO: Biological Process	GO:0002286	T cell activation involved in immune response				1.78e-06	0.0101	2.01e-05	0.000185	12	126	FGL2,CCR2,FCER1G,FCGR2B,CCL20,ANXA1,GPR183,LCP1,NLRP3,LGALS3,CD86,IL6
GO: Biological Process	GO:0010573	vascular endothelial growth factor production				1.78e-06	0.0102	2.02e-05	0.000186	9	66	HPSE,PTGS2,CCR2,ADORA2B,CCL2,C3,C3AR1,C5AR1,IL6
GO: Biological Process	GO:0002335	mature B cell differentiation				1.8e-06	0.0103	2.04e-05	0.000188	7	35	SLAMF8,IL10,FCGR2B,DOCK10,GPR183,CR1,IL6
GO: Biological Process	GO:0048661	positive regulation of smooth muscle cell proliferation				1.93e-06	0.011	2.17e-05	0.000201	12	127	IL10,EREG,HMOX1,PTAFR,PTGS2,CCN4,C3AR1,CCL5,MMP2,MMP9,IGF1,IL6
GO: Biological Process	GO:0051480	regulation of cytosolic calcium ion concentration				1.96e-06	0.0112	2.2e-05	0.000203	22	403	CD52,MYO5A,PTGDR,CCR2,PTPRC,CLIC2,PIK3CG,CXCL9,CCR1,C3AR1,GNA15,CCR5,C5AR1,PLN,GPR18,GPR65,FPR1,FPR3,CCRL2,CD36,LYN,CXCR2
GO: Biological Process	GO:0038061	NIK/NF-kappaB signaling				1.97e-06	0.0112	2.21e-05	0.000204	15	200	RASSF2,PTPN22,TLR7,CHI3L1,LAPTM5,NOD2,BIRC3,NLRP3,CD14,CD86,TLR1,TLR2,TLR4,TREM2,GREM1
GO: Biological Process	GO:0071417	cellular response to organonitrogen compound				2.02e-06	0.0115	2.26e-05	0.000209	31	711	CYBB,PDE4B,MYO5A,TCIRG1,PTPN22,ITGA4,PTAFR,ADCY7,NOD2,PTPRE,FCGR2B,PIK3CG,AHR,HRH1,GNA15,MMP2,COL1A1,COL1A2,COL16A1,FOLR2,NR4A2,SLC1A3,AQP9,LEP,NLRP3,IGF1,CD36,TLR2,TLR4,TREM2,LYN
GO: Biological Process	GO:0002377	immunoglobulin production				2.15e-06	0.0123	2.4e-05	0.000222	16	228	IL10,TCIRG1,FGL2,NOD2,PTPRC,FCGR2B,SASH3,BTK,IL33,SAMHD1,CR1,CD28,CD86,IGKC,IL6,IL7R
GO: Biological Process	GO:0071402	cellular response to lipoprotein particle stimulus				2.21e-06	0.0126	2.46e-05	0.000227	7	36	CES1,ITGB2,FCER1G,APOE,ABCG1,CD36,TLR4
GO: Biological Process	GO:1903426	regulation of reactive oxygen species biosynthetic process				2.28e-06	0.013	2.53e-05	0.000234	12	129	IL10,ACP5,CLEC7A,ITGB2,PTGS2,HRH1,ALOX5,IGF1,CD36,TLR2,TLR4,IL6
GO: Biological Process	GO:0006026	aminoglycan catabolic process				2.31e-06	0.0131	2.55e-05	0.000236	9	68	CHI3L1,CHIT1,HPSE,KERA,OMD,OGN,VCAN,CD44,LUM
GO: Biological Process	GO:0043030	regulation of macrophage activation				2.31e-06	0.0131	2.55e-05	0.000236	9	68	IL10,VSIG4,CD84,PTPRC,FCGR2B,IL33,TLR4,TREM2,IL6
GO: Biological Process	GO:0022617	extracellular matrix disassembly				2.36e-06	0.0134	2.61e-05	0.000241	10	87	FAP,MMP1,MMP2,MMP9,MMP12,LCP1,TIMP2,CD44,CTSS,IL6
GO: Biological Process	GO:0002922	positive regulation of humoral immune response				2.5e-06	0.0142	2.76e-05	0.000254	6	24	HLA-DMA,NOD2,PTPRC,FCGR2B,C3,CR1
GO: Biological Process	GO:0032621	interleukin-18 production				2.52e-06	0.0143	2.77e-05	0.000256	5	14	IL10,NOD2,CD84,NLRP3,TLR2
GO: Biological Process	GO:0010959	regulation of metal ion transport				2.57e-06	0.0146	2.83e-05	0.000261	19	317	PDE4B,MYO5A,PTPN22,GEM,PTGS2,CD84,CLIC2,PIK3CG,CXCL9,AHR,CCL2,CCR1,CCL4,CCL5,PLN,LGALS3,IGF1,SERPINE1,LYN
GO: Biological Process	GO:1901652	response to peptide				2.76e-06	0.0157	3.03e-05	0.00028	27	579	CYBB,IL10,EREG,MYO5A,SERPINF1,TCIRG1,PTPN22,ITGA4,ADCY7,NOD2,ADORA2B,PTPRE,FCGR2B,MMP2,MMP9,MMP12,PLN,COL1A1,ANXA1,NR4A2,LEP,IGF1,CD36,TLR2,TLR4,TREM2,LYN
GO: Biological Process	GO:0071224	cellular response to peptidoglycan				2.84e-06	0.0162	3.11e-05	0.000287	4	7	NOD2,NLRP3,TLR2,TREM2
GO: Biological Process	GO:1903409	reactive oxygen species biosynthetic process				2.99e-06	0.017	3.27e-05	0.000301	13	156	CYBB,IL10,ACP5,CLEC7A,ITGB2,PTGS2,HRH1,ALOX5,IGF1,CD36,TLR2,TLR4,IL6
GO: Biological Process	GO:2000377	regulation of reactive oxygen species metabolic process				3.01e-06	0.0172	3.29e-05	0.000303	16	234	IL10,ACP5,CLEC7A,ITGAM,ITGB2,PTGS2,TYROBP,HRH1,ALOX5,RAC2,LEP,IGF1,CD36,TLR2,TLR4,IL6
GO: Biological Process	GO:0046632	alpha-beta T cell differentiation				3.14e-06	0.0179	3.42e-05	0.000315	12	133	ITK,CCR2,SASH3,CCL20,LILRB4,GPR18,ANXA1,GPR183,NLRP3,CD86,IL6,NCKAP1L
GO: Biological Process	GO:0007202	activation of phospholipase C activity				3.14e-06	0.0179	3.42e-05	0.000315	12	133	ITK,HRH1,C3AR1,GNA15,C5AR1,SELE,GPR18,GPR65,FPR1,FPR3,CD86,CXCR2
GO: Biological Process	GO:0045637	regulation of myeloid cell differentiation				3.19e-06	0.0182	3.46e-05	0.000319	18	292	INHBA,RASSF2,EVI2B,DCSTAMP,ITGAM,TYROBP,CCR1,CCL5,GPR171,LILRB4,LEP,LGALS3,LOX,TLR4,TREM2,LYN,HCLS1,NCKAP1L
GO: Biological Process	GO:0043372	positive regulation of CD4-positive, alpha-beta T cell differentiation				3.24e-06	0.0185	3.5e-05	0.000323	7	38	CCR2,SASH3,ANXA1,NLRP3,CD86,IL6,NCKAP1L
GO: Biological Process	GO:0002861	regulation of inflammatory response to antigenic stimulus				3.24e-06	0.0185	3.5e-05	0.000323	7	38	IL10,NOD2,FCER1G,FCGR2B,BTK,C3,CD28
GO: Biological Process	GO:0019915	lipid storage				3.57e-06	0.0203	3.84e-05	0.000354	10	91	CES1,GM2A,C3,APOE,LEP,MSR1,ABCG1,CD36,IL6,SOAT1
GO: Biological Process	GO:0001910	regulation of leukocyte mediated cytotoxicity				3.57e-06	0.0203	3.84e-05	0.000354	10	91	ITGAM,TYROBP,PTPRC,FCGR2B,CCL2,CXCL6,VAV1,LEP,CRTAM,IL7R
GO: Biological Process	GO:1901699	cellular response to nitrogen compound				3.66e-06	0.0209	3.94e-05	0.000363	32	769	CYBB,PDE4B,MYO5A,TCIRG1,PTPN22,ITGA4,PTAFR,ADCY7,NOD2,IFIH1,PTPRE,FCGR2B,PIK3CG,AHR,HRH1,GNA15,MMP2,COL1A1,COL1A2,COL16A1,FOLR2,NR4A2,SLC1A3,AQP9,LEP,NLRP3,IGF1,CD36,TLR2,TLR4,TREM2,LYN
GO: Biological Process	GO:1902563	regulation of neutrophil activation				3.72e-06	0.0212	3.99e-05	0.000368	5	15	CD300A,PTAFR,ITGAM,ITGB2,FCGR2B
GO: Biological Process	GO:1901224	positive regulation of NIK/NF-kappaB signaling				3.75e-06	0.0214	4.01e-05	0.00037	9	72	TLR7,LAPTM5,NOD2,CD14,CD86,TLR2,TLR4,TREM2,GREM1
GO: Biological Process	GO:0022603	regulation of anatomical structure morphogenesis				3.76e-06	0.0214	4.01e-05	0.00037	42	1160	CYBB,IL10,HLA-DMA,SERPINF1,GATA6,HMOX1,CHI3L1,ITGAX,ITGB2,ZEB2,TWIST1,CCR2,CCL2,FGF7,C3,C3AR1,CCL5,CCL7,CCL11,C5AR1,GPNMB,FGR,MMP9,ALOX5,RAC2,LST1,ANXA1,APOE,ADAM12,LEP,LGALS3,POSTN,THBS2,PLXNC1,CD36,SERPINE1,CD44,GREM1,HCK,IL6,CXCL8,CXCR2
GO: Biological Process	GO:0001667	ameboidal-type cell migration				3.84e-06	0.0218	4.09e-05	0.000377	25	520	SERPINF1,HMOX1,ITGA4,ITGB2,PTGS2,ZEB2,TWIST1,NRP2,MEOX2,ADORA2B,FAP,SRPX2,PIK3CG,SCG2,LPXN,FGF7,MMP9,MMP12,ANXA1,APOE,IGF1,EGR3,SERPINE1,DUSP10,GREM1
GO: Biological Process	GO:1902624	positive regulation of neutrophil migration				3.89e-06	0.0222	4.14e-05	0.000382	7	39	C3AR1,C5AR1,RAC2,SELL,CXCL8,CXCR2,NCKAP1L
GO: Biological Process	GO:0045429	positive regulation of nitric oxide biosynthetic process				4.11e-06	0.0234	4.36e-05	0.000403	8	55	CLEC7A,ITGB2,PTGS2,HRH1,CD36,TLR2,TLR4,IL6
GO: Biological Process	GO:0043491	protein kinase B signaling				4.24e-06	0.0242	4.5e-05	0.000415	18	298	EREG,CHI3L1,HPSE,TRAT1,PIK3CG,CCL2,FGF7,CCL5,VAV1,RAC2,LEP,AREG,IGF1,CD28,CD86,LOX,IL6,HCLS1
GO: Biological Process	GO:0050871	positive regulation of B cell activation				4.54e-06	0.0259	4.8e-05	0.000443	13	162	IL10,NOD2,PTPRC,SASH3,BTK,GPR183,CD28,IGKC,TLR4,IGLC1,TRBC1,IL6,NCKAP1L
GO: Biological Process	GO:0043086	negative regulation of catalytic activity				4.55e-06	0.0259	4.8e-05	0.000443	37	969	CD300A,SERPINF1,P2RY13,PTPN22,PTGS2,ADCY7,FABP4,CCR2,PTPRC,AHR,C3,PLAUR,PLEK,MMP9,PLN,LILRB4,RARRES1,ANXA1,APOC1,APOE,CR1,RGS1,LGALS3,IGF1,TIMP2,GZMA,SERPINE1,AOC3,CD44,LAMP3,CSTA,IRAK3,DUSP10,LYN,IL6,NCKAP1L,PHACTR1
GO: Biological Process	GO:0002824	positive regulation of adaptive immune response based on somatic recombination of immune receptors built from immunoglobulin superfamily domains				4.6e-06	0.0262	4.85e-05	0.000447	11	115	HLA-DMA,NOD2,CCR2,PTPRC,FCER1G,SASH3,BTK,C3,NLRP3,CD28,IL6
GO: Biological Process	GO:1904994	regulation of leukocyte adhesion to vascular endothelial cell				4.65e-06	0.0265	4.89e-05	0.000451	7	40	ITGA4,PTAFR,ITGB2,CCR2,ALOX5,SELE,IL6
GO: Biological Process	GO:1903305	regulation of regulated secretory pathway				4.7e-06	0.0268	4.94e-05	0.000455	14	188	CD300A,HMOX1,PTAFR,ADGRE2,ITGAM,ITGB2,CD84,CCR2,ADORA2B,FCER1G,FCGR2B,FGR,RAC2,LYN
GO: Biological Process	GO:1904407	positive regulation of nitric oxide metabolic process				4.72e-06	0.0269	4.94e-05	0.000455	8	56	CLEC7A,ITGB2,PTGS2,HRH1,CD36,TLR2,TLR4,IL6
GO: Biological Process	GO:0002437	inflammatory response to antigenic stimulus				4.72e-06	0.0269	4.94e-05	0.000455	9	74	IL10,NOD2,FCER1G,FCGR2B,BTK,C3,CD28,IL1RN,CXCR2
GO: Biological Process	GO:1900046	regulation of hemostasis				4.72e-06	0.0269	4.94e-05	0.000455	9	74	HPSE,S100A9,FAP,PLAUR,COMP,APOE,THBD,CD36,SERPINE1
GO: Biological Process	GO:0150064	vertebrate eye-specific patterning				5.06e-06	0.0288	5.23e-05	0.000483	3	3	ITGAM,C1QA,C3
GO: Biological Process	GO:0071727	cellular response to triacyl bacterial lipopeptide				5.06e-06	0.0288	5.23e-05	0.000483	3	3	CD14,TLR1,TLR2
GO: Biological Process	GO:0071725	response to triacyl bacterial lipopeptide				5.06e-06	0.0288	5.23e-05	0.000483	3	3	CD14,TLR1,TLR2
GO: Biological Process	GO:2000363	positive regulation of prostaglandin-E synthase activity				5.06e-06	0.0288	5.23e-05	0.000483	3	3	ITGAM,ITGB2,NOD2
GO: Biological Process	GO:2000361	regulation of prostaglandin-E synthase activity				5.06e-06	0.0288	5.23e-05	0.000483	3	3	ITGAM,ITGB2,NOD2
GO: Biological Process	GO:0002540	leukotriene production involved in inflammatory response				5.06e-06	0.0288	5.23e-05	0.000483	3	3	ALOX5,ALOX5AP,SERPINE1
GO: Biological Process	GO:0052548	regulation of endopeptidase activity				5.15e-06	0.0294	5.32e-05	0.000491	23	461	SERPINF1,CLEC7A,PTGS2,LAPTM5,S100A8,S100A9,C3,PLAUR,MMP9,RARRES1,CASP1,BIRC3,CR1,NLRP3,IGF1,TIMP2,SERPINE1,CD44,LAMP3,CSTA,LYN,CTSD,IL6
GO: Biological Process	GO:0043549	regulation of kinase activity				5.17e-06	0.0294	5.32e-05	0.000491	38	1014	SLAMF8,EREG,RASSF2,CD300A,PTPN22,CHI3L1,ZEB2,ADCY7,FABP4,NOD2,ADORA2B,S100A12,PTPRC,PIK3CG,CCL5,C5AR1,GPNMB,FGR,RAC2,LILRB4,MDFIC,MAP3K8,FPR1,APOE,LCP2,LEP,AREG,IGF1,CD86,TLR1,TLR4,IRAK3,DUSP10,GREM1,LYN,IL1RN,IL6,NCKAP1L
GO: Biological Process	GO:0032753	positive regulation of interleukin-4 production				5.26e-06	0.03	5.41e-05	0.000499	6	27	FCER1G,SASH3,IL33,NLRP3,CD28,CD86
GO: Biological Process	GO:0033627	cell adhesion mediated by integrin				5.29e-06	0.0301	5.43e-05	0.000501	9	75	ITGA4,ITGB2,PIK3CG,LPXN,CCL5,COL16A1,SERPINE1,LYN,NCKAP1L
GO: Biological Process	GO:0002820	negative regulation of adaptive immune response				5.41e-06	0.0308	5.54e-05	0.000511	8	57	SAMSN1,NOD2,PTPRC,FCGR2B,IL33,LILRB4,CR1,IL7R
GO: Biological Process	GO:0045639	positive regulation of myeloid cell differentiation				5.44e-06	0.031	5.56e-05	0.000513	11	117	INHBA,EVI2B,DCSTAMP,ITGAM,TYROBP,CCR1,CCL5,LEP,TREM2,HCLS1,NCKAP1L
GO: Biological Process	GO:0042554	superoxide anion generation				5.52e-06	0.0315	5.64e-05	0.00052	7	41	CYBB,ACP5,CLEC7A,NCF2,ITGAM,ITGB2,TYROBP
GO: Biological Process	GO:0034238	macrophage fusion				5.6e-06	0.0319	5.7e-05	0.000526	4	8	DCSTAMP,TYROBP,CD44,TREM2
GO: Biological Process	GO:1903034	regulation of response to wounding				5.64e-06	0.0321	5.74e-05	0.000529	14	191	IL10,CLEC7A,HPSE,CCN4,S100A9,FAP,CCL2,PLAUR,ALOX5,ANXA1,APOE,THBD,CD36,SERPINE1
GO: Biological Process	GO:0042063	gliogenesis				5.67e-06	0.0323	5.76e-05	0.000531	20	366	ITGAM,CCR2,S100A8,S100A9,C1QA,CCL2,C5AR1,IL33,ANXA1,GPR183,AREG,IGF1,VCAN,TLR2,TLR4,TREM2,DUSP10,TNFRSF1B,LYN,IL6
GO: Biological Process	GO:0051093	negative regulation of developmental process				5.89e-06	0.0336	5.97e-05	0.000551	40	1100	EREG,INHBA,ASPN,SERPINF1,PLAC8,FGL2,TWIST1,CCR2,CCN4,FCGR2B,AHR,CCL2,CCR1,CCL11,GPR171,MMP9,ALOX5,LILRB4,COL5A1,ANXA1,APOE,RUNX1T1,CR1,LEP,AREG,ZFPM2,POSTN,THBS2,ABCG1,IGF1,CD86,CD36,TLR2,TLR4,SERPINE1,CD44,DUSP10,GREM1,LYN,IL6
GO: Biological Process	GO:0046638	positive regulation of alpha-beta T cell differentiation				6.18e-06	0.0352	6.26e-05	0.000577	8	58	CCR2,SASH3,LILRB4,ANXA1,NLRP3,CD86,IL6,NCKAP1L
GO: Biological Process	GO:0002701	negative regulation of production of molecular mediator of immune response				6.53e-06	0.0372	6.6e-05	0.000608	7	42	IL10,HMOX1,FCGR2B,IL33,LILRB4,CR1,IRAK3
GO: Biological Process	GO:0002313	mature B cell differentiation involved in immune response				6.6e-06	0.0376	6.63e-05	0.000612	6	28	IL10,FCGR2B,DOCK10,GPR183,CR1,IL6
GO: Biological Process	GO:0051769	regulation of nitric-oxide synthase biosynthetic process				6.6e-06	0.0376	6.63e-05	0.000612	6	28	NOD2,CCL2,CCL20,IL33,TLR2,TLR4
GO: Biological Process	GO:0051767	nitric-oxide synthase biosynthetic process				6.6e-06	0.0376	6.63e-05	0.000612	6	28	NOD2,CCL2,CCL20,IL33,TLR2,TLR4
GO: Biological Process	GO:0038094	Fc-gamma receptor signaling pathway				6.68e-06	0.0381	6.7e-05	0.000618	12	143	PTPRC,FCER1G,FCGR2A,FCGR2B,FGR,VAV1,CD3G,IGKC,IGLC1,LYN,HCK,NCKAP1L
GO: Biological Process	GO:0033674	positive regulation of kinase activity				7.08e-06	0.0403	7.09e-05	0.000654	29	682	EREG,RASSF2,CD300A,CHI3L1,ZEB2,ADCY7,NOD2,ADORA2B,S100A12,PTPRC,PIK3CG,CCL5,C5AR1,GPNMB,FGR,MDFIC,MAP3K8,FPR1,LCP2,LEP,AREG,IGF1,CD86,TLR1,TLR4,GREM1,LYN,IL1RN,NCKAP1L
GO: Biological Process	GO:2000514	regulation of CD4-positive, alpha-beta T cell activation				7.34e-06	0.0418	7.32e-05	0.000675	9	78	CCR2,SASH3,CCL20,ANXA1,NLRP3,CD86,CD44,IL6,NCKAP1L
GO: Biological Process	GO:0006801	superoxide metabolic process				7.34e-06	0.0418	7.32e-05	0.000675	9	78	CYBB,ACP5,CLEC7A,NCF2,NCF4,ITGAM,ITGB2,TYROBP,CD36
GO: Biological Process	GO:0002830	positive regulation of type 2 immune response				7.46e-06	0.0425	7.41e-05	0.000684	5	17	NOD2,IL33,NLRP3,CD86,IL6
GO: Biological Process	GO:0010935	regulation of macrophage cytokine production				7.46e-06	0.0425	7.41e-05	0.000684	5	17	LAPTM5,CD36,TLR2,TLR4,IRAK3
GO: Biological Process	GO:0035710	CD4-positive, alpha-beta T cell activation				7.53e-06	0.0429	7.47e-05	0.000689	11	121	TCIRG1,CCR2,SASH3,CCL20,ANXA1,GPR183,NLRP3,CD86,CD44,IL6,NCKAP1L
GO: Biological Process	GO:0060759	regulation of response to cytokine stimulus				7.6e-06	0.0433	7.51e-05	0.000693	14	196	LAPTM5,IFIH1,PTPRC,CCL5,MMP12,CASP1,BIRC3,SAMHD1,TLR2,TLR4,TREM2,IRAK3,IL1RN,IL6
GO: Biological Process	GO:0048002	antigen processing and presentation of peptide antigen				7.6e-06	0.0433	7.51e-05	0.000693	14	196	CYBB,HLA-DMA,HLA-DRB4,NCF2,NCF4,FCER1G,FCGR1B,FCGR2B,CLEC4A,MARCHF1,CD36,TREM2,CTSD,CTSS
GO: Biological Process	GO:1901214	regulation of neuron death				7.71e-06	0.0439	7.61e-05	0.000702	21	406	IL10,SERPINF1,NCF2,HMOX1,ITGAM,ITGB2,TYROBP,FCGR2B,KCNMA1,C1QA,CCL2,CCL5,C5AR1,GPNMB,NR4A2,APOE,IGF1,TLR4,TNFRSF1B,IL6,CTSZ
GO: Biological Process	GO:0045860	positive regulation of protein kinase activity				7.88e-06	0.0449	7.76e-05	0.000716	27	613	EREG,RASSF2,CD300A,CHI3L1,ZEB2,ADCY7,NOD2,ADORA2B,S100A12,PTPRC,PIK3CG,CCL5,C5AR1,GPNMB,MDFIC,MAP3K8,FPR1,LCP2,LEP,AREG,IGF1,CD86,TLR1,TLR4,GREM1,IL1RN,NCKAP1L
GO: Biological Process	GO:0043370	regulation of CD4-positive, alpha-beta T cell differentiation				8.01e-06	0.0456	7.88e-05	0.000727	8	60	CCR2,SASH3,CCL20,ANXA1,NLRP3,CD86,IL6,NCKAP1L
GO: Biological Process	GO:0006816	calcium ion transport				8.11e-06	0.0462	7.96e-05	0.000735	23	474	PDE4B,MYO5A,PTPN22,GEM,PTGS2,CD84,PTPRC,CLIC2,PIK3CG,CXCL9,AHR,HRH1,CCL2,CCR1,CCL4,CCL5,CCR5,CCL8,PLN,LGALS3,IGF1,SERPINE1,LYN
GO: Biological Process	GO:0032703	negative regulation of interleukin-2 production				8.21e-06	0.0467	8.04e-05	0.000742	6	29	VSIG4,LAPTM5,NOD2,PTPRC,LILRB4,CR1
GO: Biological Process	GO:0002431	Fc receptor mediated stimulatory signaling pathway				8.27e-06	0.0471	8.09e-05	0.000747	12	146	PTPRC,FCER1G,FCGR2A,FCGR2B,FGR,VAV1,CD3G,IGKC,IGLC1,LYN,HCK,NCKAP1L
GO: Biological Process	GO:0032633	interleukin-4 production				9.01e-06	0.0513	8.8e-05	0.000812	7	44	ITK,FCER1G,SASH3,IL33,NLRP3,CD28,CD86
GO: Biological Process	GO:0046637	regulation of alpha-beta T cell differentiation				9.06e-06	0.0516	8.82e-05	0.000814	9	80	CCR2,SASH3,CCL20,LILRB4,ANXA1,NLRP3,CD86,IL6,NCKAP1L
GO: Biological Process	GO:0042130	negative regulation of T cell proliferation				9.06e-06	0.0516	8.82e-05	0.000814	9	80	IL10,VSIG4,LAPTM5,GPNMB,LILRB4,CR1,CD86,CRTAM,CD44
GO: Biological Process	GO:0017157	regulation of exocytosis				9.46e-06	0.0539	9.2e-05	0.000848	16	256	MYO5A,CD300A,HMOX1,PTAFR,ADGRE2,ITGAM,ITGB2,CD84,CCR2,ADORA2B,FCER1G,FCGR2B,FGR,RAC2,ANXA1,LYN
GO: Biological Process	GO:2000379	positive regulation of reactive oxygen species metabolic process				9.53e-06	0.0542	9.23e-05	0.000851	11	124	CLEC7A,ITGAM,ITGB2,PTGS2,TYROBP,HRH1,LEP,CD36,TLR2,TLR4,IL6
GO: Biological Process	GO:0002708	positive regulation of lymphocyte mediated immunity				9.53e-06	0.0542	9.23e-05	0.000851	11	124	NOD2,PTPRC,FCER1G,SASH3,BTK,C3,VAV1,NLRP3,CD28,CRTAM,IL6
GO: Biological Process	GO:0070339	response to bacterial lipopeptide				9.94e-06	0.0566	9.56e-05	0.000882	4	9	CD14,CD36,TLR1,TLR2
GO: Biological Process	GO:0071220	cellular response to bacterial lipoprotein				9.94e-06	0.0566	9.56e-05	0.000882	4	9	CD14,CD36,TLR1,TLR2
GO: Biological Process	GO:0071221	cellular response to bacterial lipopeptide				9.94e-06	0.0566	9.56e-05	0.000882	4	9	CD14,CD36,TLR1,TLR2
GO: Biological Process	GO:2000501	regulation of natural killer cell chemotaxis				9.94e-06	0.0566	9.56e-05	0.000882	4	9	CCL2,CCL4,CCL5,CCL7
GO: Biological Process	GO:0060263	regulation of respiratory burst				1.02e-05	0.058	9.73e-05	0.000898	5	18	SLAMF8,CLEC7A,RAC2,JCHAIN,DUSP10
GO: Biological Process	GO:0070486	leukocyte aggregation				1.02e-05	0.058	9.73e-05	0.000898	5	18	CFH,S100A8,S100A9,RAC2,CD44
GO: Biological Process	GO:0060099	regulation of phagocytosis, engulfment				1.02e-05	0.058	9.73e-05	0.000898	5	18	CD300A,C3,CD36,TREM2,NCKAP1L
GO: Biological Process	GO:0006957	complement activation, alternative pathway				1.02e-05	0.058	9.73e-05	0.000898	5	18	CFH,VSIG4,CFD,C3,CR1
GO: Biological Process	GO:0034113	heterotypic cell-cell adhesion				1.03e-05	0.0585	9.81e-05	0.000904	8	62	IL10,ITGA4,ITGAX,ITGB2,PTPRC,CD2,CD44,IL1RN
GO: Biological Process	GO:0043270	positive regulation of ion transport				1.03e-05	0.0587	9.82e-05	0.000906	32	809	CES1,PTPN22,PTAFR,ITGAM,ITGB2,PTGS2,CCR2,S100A8,ADORA2B,CXCL9,CCL2,C3,CCR1,CCL4,CCL5,ALOX5,PLTP,RAC2,APOE,LEP,LGALS3,ABCG1,IGF1,TLR2,GZMB,TLR4,SERPINE1,AOC3,TREM2,CTSS,IL6,HCLS1
GO: Biological Process	GO:0032735	positive regulation of interleukin-12 production				1.05e-05	0.0599	9.98e-05	0.000921	7	45	CLEC7A,LAPTM5,NOD2,IRF8,CD36,TLR2,TLR4
GO: Biological Process	GO:2000516	positive regulation of CD4-positive, alpha-beta T cell activation				1.05e-05	0.0599	9.98e-05	0.000921	7	45	CCR2,SASH3,ANXA1,NLRP3,CD86,IL6,NCKAP1L
GO: Biological Process	GO:0014002	astrocyte development				1.22e-05	0.0696	0.000116	0.00107	7	46	S100A8,S100A9,C1QA,C5AR1,TLR4,TREM2,IL6
GO: Biological Process	GO:0032647	regulation of interferon-alpha production				1.24e-05	0.0704	0.000117	0.00108	6	31	IL10,PTPN22,TLR7,IFIH1,MMP12,TLR4
GO: Biological Process	GO:0042493	response to drug				1.24e-05	0.0708	0.000117	0.00108	21	419	CYBB,SLAMF8,IL10,PDE4B,INHBA,GATA6,HMOX1,MMP2,MMP9,NNMT,COL1A1,DPYD,ANXA1,TDO2,SLC1A3,TIMP2,LOX,SERPINE1,CD69,LYN,NCKAP1L
GO: Biological Process	GO:1905517	macrophage migration				1.31e-05	0.0744	0.000123	0.00114	8	64	SLAMF8,CCR2,CCL2,C3AR1,CCL5,C5AR1,LGALS3,TREM2
GO: Biological Process	GO:1903036	positive regulation of response to wounding				1.35e-05	0.0771	0.000128	0.00118	9	84	CLEC7A,HPSE,CCN4,S100A9,CCL2,ANXA1,THBD,CD36,SERPINE1
GO: Biological Process	GO:1905153	regulation of membrane invagination				1.36e-05	0.0776	0.000128	0.00118	5	19	CD300A,C3,CD36,TREM2,NCKAP1L
GO: Biological Process	GO:0033033	negative regulation of myeloid cell apoptotic process				1.36e-05	0.0776	0.000128	0.00118	5	19	CLEC5A,NOD2,FCER1G,CCL5,CXCR2
GO: Biological Process	GO:0010934	macrophage cytokine production				1.36e-05	0.0776	0.000128	0.00118	5	19	LAPTM5,CD36,TLR2,TLR4,IRAK3
GO: Biological Process	GO:0034142	toll-like receptor 4 signaling pathway				1.42e-05	0.0806	0.000132	0.00122	7	47	PTPN22,LY96,ITGAM,ITGB2,CD14,TLR4,LYN
GO: Biological Process	GO:0034122	negative regulation of toll-like receptor signaling pathway				1.42e-05	0.0806	0.000132	0.00122	7	47	CD300A,LY96,NOD2,CD14,TLR4,IRAK3,LYN
GO: Biological Process	GO:0052547	regulation of peptidase activity				1.43e-05	0.0813	0.000133	0.00123	23	491	SERPINF1,CLEC7A,PTGS2,LAPTM5,S100A8,S100A9,C3,PLAUR,MMP9,RARRES1,CASP1,BIRC3,CR1,NLRP3,IGF1,TIMP2,SERPINE1,CD44,LAMP3,CSTA,LYN,CTSD,IL6
GO: Biological Process	GO:0097190	apoptotic signaling pathway				1.48e-05	0.0845	0.000138	0.00127	28	672	INHBA,BCL2A1,HMOX1,LY96,ITGAM,PTGS2,S100A8,S100A9,TYROBP,PTPRC,VNN1,SCG2,BTK,PLAUR,SRPX,MMP9,IL33,NR4A2,CASP1,LGALS3,IGF1,CD14,CD28,GZMB,TLR4,SERPINE1,CD44,TNFRSF1B
GO: Biological Process	GO:0036037	CD8-positive, alpha-beta T cell activation				1.5e-05	0.0854	0.000139	0.00129	6	32	PTPN22,CLEC4A,LILRB4,GPR18,CRTAM,NCKAP1L
GO: Biological Process	GO:0043542	endothelial cell migration				1.51e-05	0.0861	0.00014	0.00129	17	296	SERPINF1,HMOX1,ITGB2,PTGS2,NRP2,MEOX2,ADORA2B,FAP,SRPX2,PIK3CG,SCG2,LPXN,ANXA1,APOE,IGF1,EGR3,GREM1
GO: Biological Process	GO:0051346	negative regulation of hydrolase activity				1.57e-05	0.0896	0.000146	0.00134	23	494	SERPINF1,PTGS2,AHR,C3,PLAUR,PLEK,MMP9,PLN,RARRES1,ANXA1,APOC1,CR1,LGALS3,IGF1,TIMP2,GZMA,SERPINE1,CD44,LAMP3,CSTA,IL6,NCKAP1L,PHACTR1
GO: Biological Process	GO:0002292	T cell differentiation involved in immune response				1.64e-05	0.0935	0.000152	0.0014	9	86	FGL2,CCR2,FCER1G,CCL20,ANXA1,GPR183,NLRP3,CD86,IL6
GO: Biological Process	GO:0071827	plasma lipoprotein particle organization				1.66e-05	0.0947	0.000154	0.00142	10	108	HMOX1,PLTP,PLA2G7,APOC1,APOE,MSR1,ABCG1,LIPA,CD36,SOAT1
GO: Biological Process	GO:0002455	humoral immune response mediated by circulating immunoglobulin				1.73e-05	0.0985	0.000159	0.00147	12	157	NOD2,PTPRC,FCGR2B,C1QA,C1QB,C1R,C1S,C3,CR1,IGKC,IGLC1,TRBC1
GO: Biological Process	GO:0098543	detection of other organism				1.79e-05	0.102	0.000164	0.00152	5	20	CLEC7A,NOD2,TLR1,TLR2,TLR4
GO: Biological Process	GO:0090594	inflammatory response to wounding				1.79e-05	0.102	0.000164	0.00152	5	20	CFH,HMOX1,CCR2,ALOX5,CD44
GO: Biological Process	GO:0010878	cholesterol storage				1.79e-05	0.102	0.000164	0.00152	5	20	CES1,MSR1,ABCG1,CD36,SOAT1
GO: Biological Process	GO:0045834	positive regulation of lipid metabolic process				1.8e-05	0.103	0.000165	0.00152	13	184	CES1,PTGS2,TWIST1,NOD2,ADORA2B,FGR,ANXA1,APOC1,APOE,ABCG1,IGF1,CD36,LYN
GO: Biological Process	GO:0043302	positive regulation of leukocyte degranulation				1.81e-05	0.103	0.000165	0.00152	6	33	PTAFR,ITGAM,ITGB2,ADORA2B,FCER1G,FGR
GO: Biological Process	GO:0035590	purinergic nucleotide receptor signaling pathway				1.81e-05	0.103	0.000165	0.00152	6	33	P2RY13,PTAFR,ADORA2B,ADORA3,P2RY14,GPR171
GO: Biological Process	GO:0060348	bone development				1.89e-05	0.107	0.000172	0.00159	15	241	CFH,ACP5,TWIST1,CCN4,TYROBP,PTPRC,COL1A1,SFRP4,COMP,EPYC,PAPSS2,LEP,IGF1,LOX,GREM1
GO: Biological Process	GO:0097006	regulation of plasma lipoprotein particle levels				1.95e-05	0.111	0.000176	0.00163	10	110	HMOX1,PLTP,PLA2G7,APOC1,APOE,MSR1,ABCG1,LIPA,CD36,SOAT1
GO: Biological Process	GO:0001810	regulation of type I hypersensitivity				1.96e-05	0.112	0.000176	0.00163	3	4	FCER1G,FCGR2B,BTK
GO: Biological Process	GO:0016068	type I hypersensitivity				1.96e-05	0.112	0.000176	0.00163	3	4	FCER1G,FCGR2B,BTK
GO: Biological Process	GO:0043315	positive regulation of neutrophil degranulation				1.96e-05	0.112	0.000176	0.00163	3	4	PTAFR,ITGAM,ITGB2
GO: Biological Process	GO:0038124	toll-like receptor TLR6:TLR2 signaling pathway				1.96e-05	0.112	0.000176	0.00163	3	4	CD14,CD36,TLR2
GO: Biological Process	GO:0038123	toll-like receptor TLR1:TLR2 signaling pathway				1.96e-05	0.112	0.000176	0.00163	3	4	CD14,TLR1,TLR2
GO: Biological Process	GO:0032497	detection of lipopolysaccharide				1.96e-05	0.112	0.000176	0.00163	3	4	LY96,TLR4,TREM2
GO: Biological Process	GO:0002436	immune complex clearance by monocytes and macrophages				1.96e-05	0.112	0.000176	0.00163	3	4	CCR2,FCGR2B,CCL2
GO: Biological Process	GO:0090264	regulation of immune complex clearance by monocytes and macrophages				1.96e-05	0.112	0.000176	0.00163	3	4	CCR2,FCGR2B,CCL2
GO: Biological Process	GO:0002538	arachidonic acid metabolite production involved in inflammatory response				1.96e-05	0.112	0.000176	0.00163	3	4	ALOX5,ALOX5AP,SERPINE1
GO: Biological Process	GO:0050901	leukocyte tethering or rolling				2.16e-05	0.123	0.000193	0.00178	6	34	ITGA4,PTAFR,CCR2,SELE,SELL,LEP
GO: Biological Process	GO:0055094	response to lipoprotein particle				2.16e-05	0.123	0.000193	0.00178	6	34	CES1,ITGB2,FCER1G,APOE,CD36,TLR4
GO: Biological Process	GO:0071825	protein-lipid complex subunit organization				2.29e-05	0.13	0.000204	0.00188	10	112	HMOX1,PLTP,PLA2G7,APOC1,APOE,MSR1,ABCG1,LIPA,CD36,SOAT1
GO: Biological Process	GO:0034765	regulation of ion transmembrane transport				2.29e-05	0.131	0.000204	0.00188	27	651	CYBB,PDE4B,MYO5A,TCIRG1,PTPN22,PTAFR,GEM,TWIST1,CCR2,KCNE4,CLIC2,PIK3CG,CXCL9,KCNMA1,AHR,CCL2,C3,MMP9,PLN,ALOX5,SLC31A2,LEP,IGF1,AOC3,TREM2,LYN,CTSS
GO: Biological Process	GO:0002312	B cell activation involved in immune response				2.38e-05	0.135	0.000211	0.00195	9	90	IL10,PTPRC,FCGR2B,DOCK10,GPR183,CR1,CD28,TLR4,IL6
GO: Biological Process	GO:0002686	negative regulation of leukocyte migration				2.46e-05	0.14	0.000218	0.00201	7	51	SLAMF8,CD300A,HMOX1,CCL2,IL33,GPR18,GREM1
GO: Biological Process	GO:0032493	response to bacterial lipoprotein				2.53e-05	0.144	0.000224	0.00207	4	11	CD14,CD36,TLR1,TLR2
GO: Biological Process	GO:1903238	positive regulation of leukocyte tethering or rolling				2.53e-05	0.144	0.000224	0.00207	4	11	ITGA4,PTAFR,CCR2,SELE
GO: Biological Process	GO:0002763	positive regulation of myeloid leukocyte differentiation				2.55e-05	0.145	0.000225	0.00208	8	70	EVI2B,DCSTAMP,ITGAM,TYROBP,CCR1,CCL5,TREM2,HCLS1
GO: Biological Process	GO:0034762	regulation of transmembrane transport				2.55e-05	0.145	0.000225	0.00208	27	655	CYBB,PDE4B,MYO5A,TCIRG1,PTPN22,PTAFR,GEM,TWIST1,CCR2,KCNE4,CLIC2,PIK3CG,CXCL9,KCNMA1,AHR,CCL2,C3,MMP9,PLN,ALOX5,SLC31A2,LEP,IGF1,AOC3,TREM2,LYN,CTSS
GO: Biological Process	GO:0032673	regulation of interleukin-4 production				2.57e-05	0.146	0.000226	0.00209	6	35	FCER1G,SASH3,IL33,NLRP3,CD28,CD86
GO: Biological Process	GO:0032607	interferon-alpha production				2.57e-05	0.146	0.000226	0.00209	6	35	IL10,PTPN22,TLR7,IFIH1,MMP12,TLR4
GO: Biological Process	GO:0002507	tolerance induction				2.57e-05	0.146	0.000226	0.00209	6	35	CLC,C3AR1,LILRB4,CD86,IRAK3,LYN
GO: Biological Process	GO:1904062	regulation of cation transmembrane transport				2.65e-05	0.151	0.000233	0.00215	20	407	PDE4B,MYO5A,TCIRG1,PTPN22,GEM,TWIST1,CCR2,KCNE4,CLIC2,PIK3CG,CXCL9,AHR,CCL2,MMP9,PLN,ALOX5,SLC31A2,TREM2,LYN,CTSS
GO: Biological Process	GO:0008217	regulation of blood pressure				2.79e-05	0.159	0.000244	0.00225	14	220	CES1,NCF2,HMOX1,PTAFR,PTGS2,AHR,C3AR1,COL1A2,CPA3,LEP,POSTN,CD36,AOC3,CTSZ
GO: Biological Process	GO:0002823	negative regulation of adaptive immune response based on somatic recombination of immune receptors built from immunoglobulin superfamily domains				2.8e-05	0.159	0.000244	0.00225	7	52	NOD2,PTPRC,FCGR2B,IL33,LILRB4,CR1,IL7R
GO: Biological Process	GO:0038096	Fc-gamma receptor signaling pathway involved in phagocytosis				2.8e-05	0.16	0.000244	0.00225	11	139	PTPRC,FCGR2A,FCGR2B,FGR,VAV1,CD3G,IGKC,IGLC1,LYN,HCK,NCKAP1L
GO: Biological Process	GO:0002433	immune response-regulating cell surface receptor signaling pathway involved in phagocytosis				2.8e-05	0.16	0.000244	0.00225	11	139	PTPRC,FCGR2A,FCGR2B,FGR,VAV1,CD3G,IGKC,IGLC1,LYN,HCK,NCKAP1L
GO: Biological Process	GO:0032695	negative regulation of interleukin-12 production				2.96e-05	0.169	0.000257	0.00237	5	22	IL10,ACP5,NOD2,TLR2,IRAK3
GO: Biological Process	GO:0061081	positive regulation of myeloid leukocyte cytokine production involved in immune response				2.96e-05	0.169	0.000257	0.00237	5	22	LAPTM5,FCER1G,CD36,TLR2,TLR4
GO: Biological Process	GO:0002577	regulation of antigen processing and presentation				2.96e-05	0.169	0.000257	0.00237	5	22	PTPN22,FGL2,NOD2,FCGR2B,TREM2
GO: Biological Process	GO:0019835	cytolysis				3.04e-05	0.173	0.000264	0.00243	6	36	FGL2,MICB,CR1,GZMA,GZMB,LYZ
GO: Biological Process	GO:0001894	tissue homeostasis				3.08e-05	0.176	0.000267	0.00246	17	313	ACP5,TCIRG1,DCSTAMP,PTGS2,NOD2,CCR2,SASH3,FGF7,COL14A1,RAC2,LIPA,JCHAIN,IGKC,TLR4,LYZ,CTSS,IL6
GO: Biological Process	GO:0070997	neuron death				3.34e-05	0.19	0.000289	0.00266	21	448	IL10,SERPINF1,NCF2,HMOX1,ITGAM,ITGB2,TYROBP,FCGR2B,KCNMA1,C1QA,CCL2,CCL5,C5AR1,GPNMB,NR4A2,APOE,IGF1,TLR4,TNFRSF1B,IL6,CTSZ
GO: Biological Process	GO:0070227	lymphocyte apoptotic process				3.37e-05	0.192	0.000291	0.00268	9	94	IL10,CLC,BTK,CCL5,LGALS3,CD3G,CD44,LYN,IL7R
GO: Biological Process	GO:0030193	regulation of blood coagulation				3.47e-05	0.198	0.000299	0.00275	8	73	HPSE,S100A9,FAP,PLAUR,APOE,THBD,CD36,SERPINE1
GO: Biological Process	GO:1900015	regulation of cytokine production involved in inflammatory response				3.47e-05	0.198	0.000299	0.00275	8	73	CLEC7A,ADCY7,NOD2,ALOX5,LILRB4,LEP,TLR4,IL6
GO: Biological Process	GO:0097696	receptor signaling pathway via STAT				3.51e-05	0.2	0.000301	0.00278	13	196	IL10,IL10RA,CD300A,CCR2,PTPRC,CCL2,CCL5,LEP,IGF1,LYN,IL6,HCLS1,IL7R
GO: Biological Process	GO:0045920	negative regulation of exocytosis				3.58e-05	0.204	0.000307	0.00283	6	37	CD300A,HMOX1,CD84,CCR2,FCGR2B,ANXA1
GO: Biological Process	GO:1904894	positive regulation of receptor signaling pathway via STAT				3.6e-05	0.205	0.000308	0.00284	7	54	IL10,IL10RA,CD300A,CCL5,LEP,IL6,IL7R
GO: Biological Process	GO:0030001	metal ion transport				3.61e-05	0.205	0.000308	0.00284	24	557	PDE4B,MYO5A,PTPN22,GEM,PTGS2,CD84,KCNE4,PTPRC,CLIC2,PIK3CG,CXCL9,AHR,HRH1,CCL2,CCR1,CCL4,CCL5,CCR5,CCL8,PLN,LGALS3,IGF1,SERPINE1,LYN
GO: Biological Process	GO:0001936	regulation of endothelial cell proliferation				3.7e-05	0.211	0.000316	0.00291	13	197	IL10,HMOX1,ITGA4,NRP2,ADORA2B,SCG2,CCL2,CCL11,ALOX5,APOE,LEP,IGF1,EGR3
GO: Biological Process	GO:0150146	cell junction disassembly				3.73e-05	0.212	0.000318	0.00293	5	23	ITGAM,C1QA,C1QB,C3,TREM2
GO: Biological Process	GO:0060907	positive regulation of macrophage cytokine production				3.75e-05	0.213	0.000318	0.00293	4	12	LAPTM5,CD36,TLR2,TLR4
GO: Biological Process	GO:0042340	keratan sulfate catabolic process				3.75e-05	0.213	0.000318	0.00293	4	12	KERA,OMD,OGN,LUM
GO: Biological Process	GO:0032661	regulation of interleukin-18 production				3.75e-05	0.213	0.000318	0.00293	4	12	IL10,NOD2,CD84,TLR2
GO: Biological Process	GO:0002883	regulation of hypersensitivity				3.75e-05	0.213	0.000318	0.00293	4	12	FCER1G,FCGR2B,BTK,C3
GO: Biological Process	GO:0070228	regulation of lymphocyte apoptotic process				3.83e-05	0.218	0.000324	0.00299	8	74	IL10,BTK,CCL5,LGALS3,CD3G,CD44,LYN,IL7R
GO: Biological Process	GO:1903428	positive regulation of reactive oxygen species biosynthetic process				3.83e-05	0.218	0.000324	0.00299	8	74	CLEC7A,ITGB2,PTGS2,HRH1,CD36,TLR2,TLR4,IL6
GO: Biological Process	GO:0001938	positive regulation of endothelial cell proliferation				4.16e-05	0.237	0.000351	0.00324	10	120	IL10,HMOX1,ITGA4,NRP2,ADORA2B,SCG2,CCL2,CCL11,IGF1,EGR3
GO: Biological Process	GO:0043405	regulation of MAP kinase activity				4.47e-05	0.254	0.000376	0.00347	18	355	CD300A,PTPN22,ZEB2,NOD2,ADORA2B,S100A12,PTPRC,PIK3CG,C5AR1,MDFIC,FPR1,APOE,IGF1,TLR4,IRAK3,DUSP10,LYN,IL1RN
GO: Biological Process	GO:0030194	positive regulation of blood coagulation				4.64e-05	0.264	0.00039	0.0036	5	24	HPSE,S100A9,THBD,CD36,SERPINE1
GO: Biological Process	GO:1900048	positive regulation of hemostasis				4.64e-05	0.264	0.00039	0.0036	5	24	HPSE,S100A9,THBD,CD36,SERPINE1
GO: Biological Process	GO:0043367	CD4-positive, alpha-beta T cell differentiation				4.7e-05	0.267	0.000394	0.00363	9	98	CCR2,SASH3,CCL20,ANXA1,GPR183,NLRP3,CD86,IL6,NCKAP1L
GO: Biological Process	GO:0002282	microglial cell activation involved in immune response				4.85e-05	0.276	0.000401	0.0037	3	5	TYROBP,IL33,TREM2
GO: Biological Process	GO:0001796	regulation of type IIa hypersensitivity				4.85e-05	0.276	0.000401	0.0037	3	5	FCER1G,FCGR2B,C3
GO: Biological Process	GO:0001794	type IIa hypersensitivity				4.85e-05	0.276	0.000401	0.0037	3	5	FCER1G,FCGR2B,C3
GO: Biological Process	GO:0001905	activation of membrane attack complex				4.85e-05	0.276	0.000401	0.0037	3	5	CFH,C3,CR1
GO: Biological Process	GO:0071726	cellular response to diacyl bacterial lipopeptide				4.85e-05	0.276	0.000401	0.0037	3	5	CD14,CD36,TLR2
GO: Biological Process	GO:0071724	response to diacyl bacterial lipopeptide				4.85e-05	0.276	0.000401	0.0037	3	5	CD14,CD36,TLR2
GO: Biological Process	GO:0032701	negative regulation of interleukin-18 production				4.85e-05	0.276	0.000401	0.0037	3	5	IL10,NOD2,CD84
GO: Biological Process	GO:0002892	regulation of type II hypersensitivity				4.85e-05	0.276	0.000401	0.0037	3	5	FCER1G,FCGR2B,C3
GO: Biological Process	GO:0034241	positive regulation of macrophage fusion				4.85e-05	0.276	0.000401	0.0037	3	5	DCSTAMP,TYROBP,TREM2
GO: Biological Process	GO:0002445	type II hypersensitivity				4.85e-05	0.276	0.000401	0.0037	3	5	FCER1G,FCGR2B,C3
GO: Biological Process	GO:0090322	regulation of superoxide metabolic process				4.88e-05	0.278	0.000403	0.00372	6	39	ACP5,CLEC7A,ITGAM,ITGB2,TYROBP,CD36
GO: Biological Process	GO:0002534	cytokine production involved in inflammatory response				5.12e-05	0.292	0.000422	0.00389	8	77	CLEC7A,ADCY7,NOD2,ALOX5,LILRB4,LEP,TLR4,IL6
GO: Biological Process	GO:0010883	regulation of lipid storage				5.14e-05	0.293	0.000422	0.0039	7	57	CES1,C3,LEP,MSR1,ABCG1,CD36,IL6
GO: Biological Process	GO:0003018	vascular process in circulatory system				5.14e-05	0.293	0.000422	0.0039	16	294	SLCO2B1,PTAFR,PTGS2,ADORA2B,KCNMA1,AHR,HRH1,MMP2,ALOX5,COMP,APOE,SLC1A3,LEP,SLC2A3,CD36,CXCR2
GO: Biological Process	GO:0002923	regulation of humoral immune response mediated by circulating immunoglobulin				5.34e-05	0.304	0.000437	0.00403	4	13	NOD2,PTPRC,FCGR2B,CR1
GO: Biological Process	GO:0033004	negative regulation of mast cell activation				5.34e-05	0.304	0.000437	0.00403	4	13	CD300A,HMOX1,CD84,MILR1
GO: Biological Process	GO:0045628	regulation of T-helper 2 cell differentiation				5.34e-05	0.304	0.000437	0.00403	4	13	ANXA1,NLRP3,CD86,IL6
GO: Biological Process	GO:0050818	regulation of coagulation				5.62e-05	0.32	0.000459	0.00423	8	78	HPSE,S100A9,FAP,PLAUR,APOE,THBD,CD36,SERPINE1
GO: Biological Process	GO:0002637	regulation of immunoglobulin production				5.62e-05	0.32	0.000459	0.00423	8	78	IL10,PTPRC,FCGR2B,SASH3,IL33,CR1,CD28,IL6
GO: Biological Process	GO:0045577	regulation of B cell differentiation				5.66e-05	0.322	0.000461	0.00425	6	40	SLAMF8,IL10,INHBA,BTK,CR1,NCKAP1L
GO: Biological Process	GO:0007267	cell-cell signaling				5.67e-05	0.323	0.000461	0.00426	57	1971	EREG,MYO5A,INHBA,CD300A,TCIRG1,ITGAM,ITGB2,PTGS2,ZEB2,CCR2,S100A8,ADORA2B,CCN4,S100A9,TYROBP,FCER1G,BTK,CXCL9,KCNMA1,HRH1,C1QA,CCL2,FGF7,C3,CCR1,CCL4,CCL5,GNA15,CCL7,CCR5,CCL8,GPNMB,CCL18,CCL20,MMP9,CXCL6,ALOX5,COL1A1,MDFIC,SFRP4,ANXA1,NR4A2,APOE,SLC1A3,LEP,AREG,LGALS3,MCTP1,EGR3,TLR2,CD44,GREM1,TNFAIP6,TNFRSF1B,LYN,IL1RN,IL6
GO: Biological Process	GO:0032727	positive regulation of interferon-alpha production				5.72e-05	0.326	0.000465	0.00429	5	25	PTPN22,TLR7,IFIH1,MMP12,TLR4
GO: Biological Process	GO:0051338	regulation of transferase activity				5.75e-05	0.328	0.000466	0.0043	38	1131	SLAMF8,EREG,RASSF2,CD300A,PTPN22,CHI3L1,ZEB2,ADCY7,FABP4,NOD2,ADORA2B,S100A12,PTPRC,PIK3CG,CCL5,C5AR1,GPNMB,FGR,RAC2,LILRB4,MDFIC,MAP3K8,FPR1,APOE,LCP2,LEP,AREG,IGF1,CD86,TLR1,TLR4,IRAK3,DUSP10,GREM1,LYN,IL1RN,IL6,NCKAP1L
GO: Biological Process	GO:0060760	positive regulation of response to cytokine stimulus				5.76e-05	0.328	0.000466	0.0043	7	58	LAPTM5,IFIH1,MMP12,CASP1,TLR2,TLR4,TREM2
GO: Biological Process	GO:0030850	prostate gland development				5.76e-05	0.328	0.000466	0.0043	7	58	SERPINF1,AHR,PLAUR,MMP2,ANXA1,IGF1,CD44
GO: Biological Process	GO:2000116	regulation of cysteine-type endopeptidase activity				5.89e-05	0.335	0.000476	0.00439	15	266	CLEC7A,PTGS2,LAPTM5,S100A8,S100A9,PLAUR,MMP9,CASP1,BIRC3,NLRP3,IGF1,CD44,LAMP3,CTSD,IL6
GO: Biological Process	GO:0002478	antigen processing and presentation of exogenous peptide antigen				5.97e-05	0.34	0.000481	0.00444	12	178	CYBB,HLA-DMA,HLA-DRB4,NCF2,NCF4,FCER1G,FCGR1B,FCGR2B,CLEC4A,CD36,CTSD,CTSS
GO: Biological Process	GO:0051130	positive regulation of cellular component organization				6.01e-05	0.342	0.000484	0.00447	42	1304	EREG,SERPINF1,CLEC7A,DCSTAMP,ZEB2,S100A9,TYROBP,SRPX2,CXCL9,AHR,C3,PLAUR,CCL11,MMP1,PLEK,MMP9,RAC2,SELE,SFRP4,COL16A1,GPR65,ANXA1,APOE,LCP1,LGALS3,THBS2,IGF1,CD14,PLXNC1,CD28,CD36,GZMB,TLR4,SERPINE1,TREM2,CD53,GREM1,LYN,HCK,IL6,HCLS1,NCKAP1L
GO: Biological Process	GO:0051347	positive regulation of transferase activity				6.1e-05	0.348	0.000491	0.00453	29	767	EREG,RASSF2,CD300A,CHI3L1,ZEB2,ADCY7,NOD2,ADORA2B,S100A12,PTPRC,PIK3CG,CCL5,C5AR1,GPNMB,FGR,MDFIC,MAP3K8,FPR1,LCP2,LEP,AREG,IGF1,CD86,TLR1,TLR4,GREM1,LYN,IL1RN,NCKAP1L
GO: Biological Process	GO:0031099	regeneration				6.3e-05	0.359	0.000506	0.00467	14	237	IL10,HMOX1,C5AR1,MMP2,NNMT,PRRX1,ANXA1,APOE,LCP1,POSTN,IGF1,SERPINE1,DUSP10,IL6
GO: Biological Process	GO:0023057	negative regulation of signaling				6.44e-05	0.367	0.000516	0.00476	50	1661	IL10,EREG,PDE4B,INHBA,RASSF2,ASPN,CD300A,PTPN22,HMOX1,LY96,PTGS2,ADCY7,TWIST1,LAPTM5,NOD2,PTPRC,PTPRE,TRAT1,FCGR2B,VNN1,SCG2,LPXN,CCL5,PLAUR,PLEK,MMP9,MMP12,LILRB4,SFRP4,NR4A2,SAMHD1,APOE,RGS1,LEP,NLRP3,AREG,LGALS3,IGF1,CD14,TIMP2,TLR4,SERPINE1,CD44,IRAK3,DUSP10,GREM1,LYN,IL1RN,IL6,CXCL8
GO: Biological Process	GO:0009725	response to hormone				6.51e-05	0.371	0.000522	0.00481	34	971	CYBB,IL10,EREG,MYO5A,INHBA,SERPINF1,GATA6,TCIRG1,NCF2,HMOX1,PTAFR,PTGDR,ME1,ADCY7,ADORA2B,PTPRE,KCNMA1,MMP2,PLN,COL1A1,SFRP4,ANXA1,NR4A2,LEP,AREG,IGF1,TIMP2,LOX,TLR2,LYN,IL1RN,CTSS,IL6,HCLS1
GO: Biological Process	GO:0010543	regulation of platelet activation				6.53e-05	0.372	0.000523	0.00482	6	41	FCER1G,PLEK,APOE,THBD,TLR4,LYN
GO: Biological Process	GO:0043281	regulation of cysteine-type endopeptidase activity involved in apoptotic process				6.59e-05	0.375	0.000526	0.00485	14	238	CLEC7A,PTGS2,LAPTM5,S100A8,S100A9,PLAUR,MMP9,CASP1,NLRP3,IGF1,CD44,LAMP3,CTSD,IL6
GO: Biological Process	GO:0045807	positive regulation of endocytosis				6.75e-05	0.384	0.000538	0.00496	10	127	C3,SELE,SFRP4,APOE,CD14,CD36,SERPINE1,TREM2,GREM1,NCKAP1L
GO: Biological Process	GO:0051896	regulation of protein kinase B signaling				6.97e-05	0.397	0.000555	0.00512	15	270	EREG,CHI3L1,HPSE,TRAT1,PIK3CG,FGF7,VAV1,RAC2,LEP,AREG,IGF1,CD28,CD86,IL6,HCLS1
GO: Biological Process	GO:0060143	positive regulation of syncytium formation by plasma membrane fusion				6.99e-05	0.398	0.000555	0.00512	5	26	DCSTAMP,TYROBP,CXCL9,TREM2,CD53
GO: Biological Process	GO:0032928	regulation of superoxide anion generation				6.99e-05	0.398	0.000555	0.00512	5	26	ACP5,CLEC7A,ITGAM,ITGB2,TYROBP
GO: Biological Process	GO:0046643	regulation of gamma-delta T cell activation				7.38e-05	0.42	0.000583	0.00538	4	14	NOD2,PTPRC,EGR3,NCKAP1L
GO: Biological Process	GO:0035589	G protein-coupled purinergic nucleotide receptor signaling pathway				7.38e-05	0.42	0.000583	0.00538	4	14	P2RY13,PTAFR,P2RY14,GPR171
GO: Biological Process	GO:0002679	respiratory burst involved in defense response				7.38e-05	0.42	0.000583	0.00538	4	14	SLAMF8,PIK3CG,DUSP10,HCK
GO: Biological Process	GO:0045940	positive regulation of steroid metabolic process				7.51e-05	0.428	0.000594	0.00548	6	42	CES1,ADORA2B,APOC1,APOE,ABCG1,IGF1
GO: Biological Process	GO:0009968	negative regulation of signal transduction				7.53e-05	0.429	0.000594	0.00548	47	1537	IL10,EREG,PDE4B,RASSF2,ASPN,CD300A,PTPN22,HMOX1,LY96,PTGS2,ADCY7,TWIST1,LAPTM5,NOD2,PTPRC,PTPRE,FCGR2B,VNN1,SCG2,LPXN,CCL5,PLAUR,PLEK,MMP9,MMP12,LILRB4,SFRP4,NR4A2,SAMHD1,APOE,RGS1,NLRP3,AREG,LGALS3,IGF1,CD14,TIMP2,TLR4,SERPINE1,CD44,IRAK3,DUSP10,GREM1,LYN,IL1RN,IL6,CXCL8
GO: Biological Process	GO:0048660	regulation of smooth muscle cell proliferation				7.86e-05	0.448	0.000619	0.00571	13	212	IL10,EREG,HMOX1,PTAFR,PTGS2,CCN4,C3AR1,CCL5,MMP2,MMP9,OGN,IGF1,IL6
GO: Biological Process	GO:0061448	connective tissue development				8.24e-05	0.469	0.000648	0.00598	16	306	CFH,CHI3L1,CCN4,C3AR1,COL1A1,COL5A1,PRRX1,COL11A1,COMP,EPYC,LEP,IGF1,LOX,CD44,GREM1,LUM
GO: Biological Process	GO:0050820	positive regulation of coagulation				8.46e-05	0.482	0.000661	0.00609	5	27	HPSE,S100A9,THBD,CD36,SERPINE1
GO: Biological Process	GO:1903306	negative regulation of regulated secretory pathway				8.46e-05	0.482	0.000661	0.00609	5	27	CD300A,HMOX1,CD84,CCR2,FCGR2B
GO: Biological Process	GO:0045061	thymic T cell selection				8.46e-05	0.482	0.000661	0.00609	5	27	HLA-DMA,PTPRC,DOCK2,CD3G,CD28
GO: Biological Process	GO:0002710	negative regulation of T cell mediated immunity				8.46e-05	0.482	0.000661	0.00609	5	27	NOD2,PTPRC,FCGR2B,LILRB4,IL7R
GO: Biological Process	GO:0045624	positive regulation of T-helper cell differentiation				8.46e-05	0.482	0.000661	0.00609	5	27	CCR2,ANXA1,NLRP3,CD86,IL6
GO: Biological Process	GO:2000403	positive regulation of lymphocyte migration				8.61e-05	0.49	0.000672	0.00619	6	43	ITGA4,CCR2,CCL4,CCL5,CCL7,CCL20
GO: Biological Process	GO:0048871	multicellular organismal homeostasis				8.62e-05	0.491	0.000672	0.0062	24	589	ACP5,TCIRG1,DCSTAMP,PTGS2,ADCY7,PLAC8,FABP4,NOD2,CCR2,SASH3,FGF7,COL14A1,CCL5,RAC2,LEP,LIPA,CD36,JCHAIN,IGKC,TLR4,IL1RN,LYZ,CTSS,IL6
GO: Biological Process	GO:0001935	endothelial cell proliferation				8.64e-05	0.492	0.000672	0.0062	13	214	IL10,HMOX1,ITGA4,NRP2,ADORA2B,SCG2,CCL2,CCL11,ALOX5,APOE,LEP,IGF1,EGR3
GO: Biological Process	GO:1903793	positive regulation of anion transport				8.85e-05	0.504	0.000687	0.00634	24	590	CES1,PTPN22,PTAFR,ITGAM,ITGB2,PTGS2,S100A8,ADORA2B,CCL2,C3,PLTP,RAC2,APOE,LEP,LGALS3,ABCG1,IGF1,TLR2,GZMB,TLR4,AOC3,TREM2,IL6,HCLS1
GO: Biological Process	GO:0006027	glycosaminoglycan catabolic process				8.88e-05	0.506	0.000689	0.00636	7	62	HPSE,KERA,OMD,OGN,VCAN,CD44,LUM
GO: Biological Process	GO:0019884	antigen processing and presentation of exogenous antigen				9.1e-05	0.518	0.000705	0.00651	12	186	CYBB,HLA-DMA,HLA-DRB4,NCF2,NCF4,FCER1G,FCGR1B,FCGR2B,CLEC4A,CD36,CTSD,CTSS
GO: Biological Process	GO:1902565	positive regulation of neutrophil activation				9.57e-05	0.545	0.000737	0.0068	3	6	PTAFR,ITGAM,ITGB2
GO: Biological Process	GO:0002238	response to molecule of fungal origin				9.57e-05	0.545	0.000737	0.0068	3	6	CLEC7A,BTK,TLR2
GO: Biological Process	GO:0034239	regulation of macrophage fusion				9.57e-05	0.545	0.000737	0.0068	3	6	DCSTAMP,TYROBP,TREM2
GO: Biological Process	GO:2000503	positive regulation of natural killer cell chemotaxis				9.57e-05	0.545	0.000737	0.0068	3	6	CCL4,CCL5,CCL7
GO: Biological Process	GO:0007259	receptor signaling pathway via JAK-STAT				9.58e-05	0.546	0.000737	0.0068	12	187	IL10,IL10RA,CD300A,CCR2,PTPRC,CCL2,CCL5,LEP,IGF1,LYN,IL6,HCLS1
GO: Biological Process	GO:2000107	negative regulation of leukocyte apoptotic process				9.85e-05	0.561	0.000757	0.00698	7	63	NOD2,FCER1G,CCL5,CD44,HCLS1,IL7R,CXCR2
GO: Biological Process	GO:0071639	positive regulation of monocyte chemotactic protein-1 production				9.92e-05	0.565	0.000759	0.007	4	15	CLEC7A,TWIST1,NOD2,CD84
GO: Biological Process	GO:0002730	regulation of dendritic cell cytokine production				9.92e-05	0.565	0.000759	0.007	4	15	CLEC7A,NOD2,TLR2,TLR4
GO: Biological Process	GO:0002524	hypersensitivity				9.92e-05	0.565	0.000759	0.007	4	15	FCER1G,FCGR2B,BTK,C3
GO: Biological Process	GO:1901216	positive regulation of neuron death				9.94e-05	0.566	0.000759	0.007	10	133	NCF2,ITGAM,ITGB2,TYROBP,FCGR2B,KCNMA1,C1QA,APOE,TLR4,CTSZ
GO: Biological Process	GO:0048659	smooth muscle cell proliferation				9.95e-05	0.566	0.000759	0.007	13	217	IL10,EREG,HMOX1,PTAFR,PTGS2,CCN4,C3AR1,CCL5,MMP2,MMP9,OGN,IGF1,IL6
GO: Biological Process	GO:0030728	ovulation				0.000102	0.578	0.000774	0.00714	5	28	EREG,INHBA,PTGS2,LEP,TNFAIP6
GO: Biological Process	GO:0021782	glial cell development				0.000106	0.603	0.000806	0.00744	10	134	ITGAM,S100A8,S100A9,C1QA,C5AR1,TLR2,TLR4,TREM2,LYN,IL6
GO: Biological Process	GO:0019935	cyclic-nucleotide-mediated signaling				0.000106	0.606	0.000809	0.00746	17	346	PDE4B,ADGRE2,ADCY7,ADORA2B,CXCL9,AHR,HRH1,CCL2,CCR1,GNA15,PLN,GPR65,ANXA1,FPR1,APOE,RGS1,CD36
GO: Biological Process	GO:1904646	cellular response to amyloid-beta				0.000112	0.636	0.000848	0.00783	6	45	ITGA4,FCGR2B,IGF1,CD36,TLR4,TREM2
GO: Biological Process	GO:0044070	regulation of anion transport				0.000113	0.643	0.000857	0.0079	35	1041	CES1,CD300A,TCIRG1,PTPN22,PTAFR,ITGAM,ITGB2,PTGS2,S100A8,ADORA2B,CCL2,C3,CCL5,ALOX5,PLTP,RAC2,MDFIC,SFRP4,ANXA1,APOC1,APOE,LCP1,LEP,LGALS3,ABCG1,IGF1,CD36,TLR2,GZMB,TLR4,AOC3,TREM2,IL1RN,IL6,HCLS1
GO: Biological Process	GO:0030100	regulation of endocytosis				0.000116	0.661	0.000879	0.00811	14	251	CD300A,C3,SELE,SFRP4,APOC1,APOE,LGALS3,MCTP1,CD14,CD36,SERPINE1,TREM2,GREM1,NCKAP1L
GO: Biological Process	GO:1903531	negative regulation of secretion by cell				0.000117	0.667	0.000886	0.00817	12	191	INHBA,CD300A,HMOX1,CD84,CCR2,FCGR2B,ANXA1,APOE,LEP,TNFRSF1B,IL1RN,IL6
GO: Biological Process	GO:0030162	regulation of proteolysis				0.000119	0.677	0.000898	0.00828	29	797	IL10,SERPINF1,CLEC7A,PTGS2,LAPTM5,S100A8,S100A9,C3,PLAUR,MMP9,IL33,RARRES1,CASP1,BIRC3,APOE,CR1,NLRP3,IGF1,TIMP2,SERPINE1,CD44,TREM2,LAMP3,CSTA,TNFRSF1B,LYN,CTSD,IL6,CTSZ
GO: Biological Process	GO:0010648	negative regulation of cell communication				0.00012	0.685	0.000907	0.00837	49	1658	IL10,EREG,PDE4B,INHBA,RASSF2,ASPN,CD300A,PTPN22,HMOX1,LY96,PTGS2,ADCY7,TWIST1,LAPTM5,NOD2,PTPRC,PTPRE,FCGR2B,VNN1,SCG2,LPXN,CCL5,PLAUR,PLEK,MMP9,MMP12,LILRB4,SFRP4,NR4A2,SAMHD1,APOE,RGS1,LEP,NLRP3,AREG,LGALS3,IGF1,CD14,TIMP2,TLR4,SERPINE1,CD44,IRAK3,DUSP10,GREM1,LYN,IL1RN,IL6,CXCL8
GO: Biological Process	GO:0050855	regulation of B cell receptor signaling pathway				0.000121	0.689	0.00091	0.00839	5	29	CD300A,PTPN22,FCGR2B,LPXN,LYN
GO: Biological Process	GO:1901623	regulation of lymphocyte chemotaxis				0.000121	0.689	0.00091	0.00839	5	29	CCR2,CCL2,CCL4,CCL5,CCL7
GO: Biological Process	GO:0009628	response to abiotic stimulus				0.000123	0.701	0.000925	0.00853	43	1391	CYBB,PDE4B,SERPINF1,GATA6,TLR7,HMOX1,CHI3L1,PTAFR,PTGS2,PLAC8,TWIST1,PTPRC,MICB,KCNMA1,HRH1,CCL2,CCL7,CCL11,MMP1,MMP2,MMP9,HSPA6,COL1A1,TFEC,COL11A1,GPR65,ANXA1,NR4A2,CASP1,NABP1,SLC1A3,AQP9,LEP,POSTN,THBD,IGF1,PIEZO2,CD14,CD36,TLR2,TLR4,LYN,CTSS
GO: Biological Process	GO:0007200	phospholipase C-activating G protein-coupled receptor signaling pathway				0.000124	0.707	0.00093	0.00858	9	111	HRH1,C3AR1,GNA15,C5AR1,GPR18,GPR65,FPR1,FPR3,CXCR2
GO: Biological Process	GO:0002832	negative regulation of response to biotic stimulus				0.000124	0.707	0.00093	0.00858	9	111	SLAMF8,VSIG4,FGL2,MICB,MMP12,SAMHD1,CR1,IRAK3,DUSP10
GO: Biological Process	GO:0002891	positive regulation of immunoglobulin mediated immune response				0.000127	0.721	0.000945	0.00872	6	46	NOD2,PTPRC,FCER1G,BTK,C3,CD28
GO: Biological Process	GO:0002714	positive regulation of B cell mediated immunity				0.000127	0.721	0.000945	0.00872	6	46	NOD2,PTPRC,FCER1G,BTK,C3,CD28
GO: Biological Process	GO:0045622	regulation of T-helper cell differentiation				0.000127	0.721	0.000945	0.00872	6	46	CCR2,CCL20,ANXA1,NLRP3,CD86,IL6
GO: Biological Process	GO:0060100	positive regulation of phagocytosis, engulfment				0.000131	0.743	0.000965	0.0089	4	16	C3,CD36,TREM2,NCKAP1L
GO: Biological Process	GO:0002863	positive regulation of inflammatory response to antigenic stimulus				0.000131	0.743	0.000965	0.0089	4	16	FCER1G,BTK,C3,CD28
GO: Biological Process	GO:1905155	positive regulation of membrane invagination				0.000131	0.743	0.000965	0.0089	4	16	C3,CD36,TREM2,NCKAP1L
GO: Biological Process	GO:0045059	positive thymic T cell selection				0.000131	0.743	0.000965	0.0089	4	16	HLA-DMA,PTPRC,DOCK2,CD3G
GO: Biological Process	GO:0002468	dendritic cell antigen processing and presentation				0.000131	0.743	0.000965	0.0089	4	16	FGL2,NOD2,FCGR2B,CLEC4A
GO: Biological Process	GO:1903236	regulation of leukocyte tethering or rolling				0.000131	0.743	0.000965	0.0089	4	16	ITGA4,PTAFR,CCR2,SELE
GO: Biological Process	GO:0042492	gamma-delta T cell differentiation				0.000131	0.743	0.000965	0.0089	4	16	PTPRC,GPR18,EGR3,NCKAP1L
GO: Biological Process	GO:0046849	bone remodeling				0.000133	0.757	0.000982	0.00906	9	112	RASSF2,ACP5,TCIRG1,DCSTAMP,RAC2,LEP,GREM1,CTSS,IL6
GO: Biological Process	GO:0008360	regulation of cell shape				0.000133	0.758	0.000982	0.00906	11	165	ITGB2,CCL2,CCL7,CCL11,FGR,RAC2,LST1,ANXA1,PLXNC1,HCK,IL6
GO: Biological Process	GO:0032147	activation of protein kinase activity				0.000134	0.762	0.000985	0.00909	18	387	CD300A,CHI3L1,ADCY7,NOD2,ADORA2B,PTPRC,CCL5,C5AR1,MDFIC,MAP3K8,FPR1,LEP,IGF1,CD86,TLR1,TLR4,GREM1,NCKAP1L
GO: Biological Process	GO:0019216	regulation of lipid metabolic process				0.000143	0.813	0.00105	0.00969	20	460	CES1,ME1,PTGS2,TWIST1,NOD2,ADORA2B,PIK3CG,KCNMA1,HRH1,C3,FGR,GLIPR1,ANXA1,APOC1,APOE,LEP,ABCG1,IGF1,CD36,LYN
GO: Biological Process	GO:0046633	alpha-beta T cell proliferation				0.000143	0.815	0.00105	0.0097	6	47	PTPN22,CCR2,PTPRC,DOCK2,CD28,CD44
GO: Biological Process	GO:0031640	killing of cells of other organism				0.000144	0.82	0.00106	0.00974	8	89	CLEC7A,S100A12,CCL2,CCL20,CXCL6,LGALS3,TREM1,LYZ
GO: Biological Process	GO:0035296	regulation of tube diameter				0.000148	0.843	0.00108	0.01	11	167	PTAFR,PTGS2,ADORA2B,KCNMA1,AHR,HRH1,MMP2,ALOX5,COMP,APOE,LEP
GO: Biological Process	GO:0097746	blood vessel diameter maintenance				0.000148	0.843	0.00108	0.01	11	167	PTAFR,PTGS2,ADORA2B,KCNMA1,AHR,HRH1,MMP2,ALOX5,COMP,APOE,LEP
GO: Biological Process	GO:0035150	regulation of tube size				0.000156	0.889	0.00114	0.0105	11	168	PTAFR,PTGS2,ADORA2B,KCNMA1,AHR,HRH1,MMP2,ALOX5,COMP,APOE,LEP
GO: Biological Process	GO:0009620	response to fungus				0.00016	0.914	0.00117	0.0108	7	68	CLEC7A,S100A8,S100A9,S100A12,BTK,TLR2,TLR4
GO: Biological Process	GO:1905521	regulation of macrophage migration				0.000161	0.918	0.00117	0.0108	6	48	SLAMF8,CCL2,C3AR1,CCL5,C5AR1,TREM2
GO: Biological Process	GO:0050856	regulation of T cell receptor signaling pathway				0.000161	0.918	0.00117	0.0108	6	48	CD300A,PTPN22,LAPTM5,TRAT1,LILRB4,LGALS3
GO: Biological Process	GO:1904035	regulation of epithelial cell apoptotic process				0.000163	0.927	0.00118	0.0109	9	115	IL10,HMOX1,ITGA4,SCG2,CCL2,SFRP4,IGF1,SERPINE1,IL6
GO: Biological Process	GO:0031580	membrane raft distribution				0.000165	0.942	0.0012	0.0111	3	7	PTPRC,DOCK2,CD2
GO: Biological Process	GO:0043305	negative regulation of mast cell degranulation				0.000165	0.942	0.0012	0.0111	3	7	CD300A,HMOX1,CD84
GO: Biological Process	GO:0034128	negative regulation of MyD88-independent toll-like receptor signaling pathway				0.000165	0.942	0.0012	0.0111	3	7	LY96,CD14,TLR4
GO: Biological Process	GO:0060142	regulation of syncytium formation by plasma membrane fusion				0.000168	0.958	0.00121	0.0112	5	31	DCSTAMP,TYROBP,CXCL9,TREM2,CD53
GO: Biological Process	GO:1905523	positive regulation of macrophage migration				0.000168	0.958	0.00121	0.0112	5	31	CCL2,C3AR1,CCL5,C5AR1,TREM2
GO: Biological Process	GO:0042832	defense response to protozoan				0.000168	0.958	0.00121	0.0112	5	31	IL10,CLEC7A,GBP2,IRF8,IL6
GO: Biological Process	GO:0002438	acute inflammatory response to antigenic stimulus				0.000168	0.958	0.00121	0.0112	5	31	FCER1G,FCGR2B,BTK,C3,CXCR2
GO: Biological Process	GO:0002371	dendritic cell cytokine production				0.000168	0.959	0.00121	0.0112	4	17	CLEC7A,NOD2,TLR2,TLR4
GO: Biological Process	GO:0045064	T-helper 2 cell differentiation				0.000168	0.959	0.00121	0.0112	4	17	ANXA1,NLRP3,CD86,IL6
GO: Biological Process	GO:0033002	muscle cell proliferation				0.000172	0.981	0.00124	0.0114	15	293	IL10,EREG,GATA6,HMOX1,PTAFR,PTGS2,CCN4,C3AR1,CCL5,MMP2,MMP9,OGN,ZFPM2,IGF1,IL6
GO: Biological Process	GO:0030301	cholesterol transport				0.000174	0.99	0.00125	0.0115	9	116	CES1,PLTP,APOC1,APOE,LEP,MSR1,ABCG1,CD36,SOAT1
GO: Biological Process	GO:2000401	regulation of lymphocyte migration				0.000176	1	0.00126	0.0116	7	69	ITGA4,CCR2,CCL2,CCL4,CCL5,CCL7,CCL20
GO: Biological Process	GO:1904019	epithelial cell apoptotic process				0.000181	1	0.00129	0.0119	10	143	IL10,HMOX1,ITGA4,PIK3CG,SCG2,CCL2,SFRP4,IGF1,SERPINE1,IL6
GO: Biological Process	GO:0048246	macrophage chemotaxis				0.000181	1	0.00129	0.0119	6	49	SLAMF8,CCL2,C3AR1,CCL5,C5AR1,LGALS3
GO: Biological Process	GO:0046427	positive regulation of receptor signaling pathway via JAK-STAT				0.000181	1	0.00129	0.0119	6	49	IL10,IL10RA,CD300A,CCL5,LEP,IL6
GO: Biological Process	GO:2000273	positive regulation of signaling receptor activity				0.000181	1	0.00129	0.0119	6	49	IL10,EREG,CCR2,CCL2,AREG,GREM1
GO: Biological Process	GO:0060333	interferon-gamma-mediated signaling pathway				0.000181	1	0.00129	0.0119	8	92	HLA-DRB4,GBP2,PTAFR,TRIM22,FCGR1B,IRF8,CD44,HCK
GO: Biological Process	GO:1902106	negative regulation of leukocyte differentiation				0.000186	1	0.00132	0.0122	9	117	INHBA,FGL2,FCGR2B,LILRB4,ANXA1,CR1,TLR4,CD44,LYN
GO: Biological Process	GO:0032987	protein-lipid complex disassembly				0.000193	1	0.00137	0.0126	7	70	HMOX1,APOC1,APOE,MSR1,LIPA,CD36,SOAT1
GO: Biological Process	GO:0034381	plasma lipoprotein particle clearance				0.000193	1	0.00137	0.0126	7	70	HMOX1,APOC1,APOE,MSR1,LIPA,CD36,SOAT1
GO: Biological Process	GO:0071829	plasma lipoprotein particle disassembly				0.000193	1	0.00137	0.0126	7	70	HMOX1,APOC1,APOE,MSR1,LIPA,CD36,SOAT1
GO: Biological Process	GO:0044403	biological process involved in symbiotic interaction				0.000197	1	0.00139	0.0128	34	1029	CFH,CLEC5A,TRIM22,NRP2,CCR2,IFIH1,PTPRC,FCGR2B,CLEC4A,FCN1,MICB,C1QA,CCL2,CCL4,CCL5,CCR5,CCL8,MMP1,MMP9,CXCL6,DOCK2,MRC1,MDFIC,PILRA,SAMHD1,APOE,CR1,CD28,CD86,LAMP3,TREM1,LYN,HCK,CXCL8
GO: Biological Process	GO:0033628	regulation of cell adhesion mediated by integrin				0.000203	1	0.00143	0.0132	6	50	PIK3CG,LPXN,CCL5,SERPINE1,LYN,NCKAP1L
GO: Biological Process	GO:0007249	I-kappaB kinase/NF-kappaB signaling				0.000207	1	0.00146	0.0135	15	298	RASSF2,TLR7,HMOX1,LY96,TRIM22,NOD2,S100A12,BTK,LILRB4,CASP1,BIRC3,CD14,CD36,TLR2,TLR4
GO: Biological Process	GO:0043112	receptor metabolic process				0.000207	1	0.00146	0.0135	12	203	ITGB2,LAPTM5,FCER1G,TRAT1,LILRB4,SELE,SFRP4,APOE,CD36,GREM1,CXCL8,CXCR2
GO: Biological Process	GO:0045824	negative regulation of innate immune response				0.000211	1	0.00148	0.0137	7	71	SLAMF8,VSIG4,MMP12,SAMHD1,CR1,IRAK3,DUSP10
GO: Biological Process	GO:0007498	mesoderm development				0.000212	1	0.00149	0.0137	14	266	IL10,INHBA,GATA6,ITGA4,ITGB2,BTK,MMP2,MMP9,COL5A1,COL8A1,COL11A1,ZFPM2,IL1RN,HCK
GO: Biological Process	GO:0010951	negative regulation of endopeptidase activity				0.000212	1	0.00149	0.0137	14	266	SERPINF1,PTGS2,C3,PLAUR,MMP9,RARRES1,CR1,IGF1,TIMP2,SERPINE1,CD44,LAMP3,CSTA,IL6
GO: Biological Process	GO:0002864	regulation of acute inflammatory response to antigenic stimulus				0.000214	1	0.00149	0.0137	4	18	FCER1G,FCGR2B,BTK,C3
GO: Biological Process	GO:0034435	cholesterol esterification				0.000214	1	0.00149	0.0137	4	18	APOC1,APOE,ABCG1,SOAT1
GO: Biological Process	GO:0034434	sterol esterification				0.000214	1	0.00149	0.0137	4	18	APOC1,APOE,ABCG1,SOAT1
GO: Biological Process	GO:0034433	steroid esterification				0.000214	1	0.00149	0.0137	4	18	APOC1,APOE,ABCG1,SOAT1
GO: Biological Process	GO:0034375	high-density lipoprotein particle remodeling				0.000214	1	0.00149	0.0137	4	18	PLTP,APOC1,APOE,ABCG1
GO: Biological Process	GO:0010885	regulation of cholesterol storage				0.000214	1	0.00149	0.0137	4	18	CES1,MSR1,ABCG1,CD36
GO: Biological Process	GO:0034134	toll-like receptor 2 signaling pathway				0.000214	1	0.00149	0.0137	4	18	NOD2,TLR1,TLR2,LYN
GO: Biological Process	GO:0006979	response to oxidative stress				0.000223	1	0.00155	0.0143	21	513	CYBB,IL10,NCF2,NCF4,HMOX1,ITGAM,PTGS2,VNN1,MICB,BTK,MMP2,MMP9,ALOX5,COL1A1,ANXA1,NR4A2,APOE,MCTP1,CD36,TLR4,IL6
GO: Biological Process	GO:0031343	positive regulation of cell killing				0.00023	1	0.00159	0.0147	7	72	CLEC7A,ITGAM,TYROBP,PTPRC,CCL2,VAV1,CRTAM
GO: Biological Process	GO:0140253	cell-cell fusion				0.00023	1	0.00159	0.0147	7	72	DCSTAMP,TYROBP,CXCL9,ADAM12,CD44,TREM2,CD53
GO: Biological Process	GO:0072678	T cell migration				0.00023	1	0.00159	0.0147	7	72	ITGA4,CCR2,PIK3CG,CCL2,CCL5,CCL20,GPR183
GO: Biological Process	GO:0000768	syncytium formation by plasma membrane fusion				0.00023	1	0.00159	0.0147	7	72	DCSTAMP,TYROBP,CXCL9,ADAM12,CD44,TREM2,CD53
GO: Biological Process	GO:1903707	negative regulation of hemopoiesis				0.000239	1	0.00165	0.0152	9	121	INHBA,FGL2,FCGR2B,LILRB4,ANXA1,CR1,TLR4,CD44,LYN
GO: Biological Process	GO:0045936	negative regulation of phosphate metabolic process				0.000241	1	0.00166	0.0154	23	592	INHBA,RASSF2,CD300A,PTPN22,SAMSN1,FABP4,TWIST1,PTPRC,AHR,PLEK,LILRB4,NIBAN1,APOC1,APOE,LGALS3,IGF1,IRAK3,DUSP10,GREM1,LYN,IL6,NCKAP1L,PHACTR1
GO: Biological Process	GO:0010563	negative regulation of phosphorus metabolic process				0.000247	1	0.0017	0.0157	23	593	INHBA,RASSF2,CD300A,PTPN22,SAMSN1,FABP4,TWIST1,PTPRC,AHR,PLEK,LILRB4,NIBAN1,APOC1,APOE,LGALS3,IGF1,IRAK3,DUSP10,GREM1,LYN,IL6,NCKAP1L,PHACTR1
GO: Biological Process	GO:0048729	tissue morphogenesis				0.000249	1	0.00172	0.0158	30	874	IL10,INHBA,GATA6,ACTG2,ITGA4,ITGAX,ITGB2,ZEB2,TWIST1,NRP2,AHR,FGF7,CCL11,MMP2,MMP9,MMP12,COL5A1,COL8A1,COL11A1,LCP1,AREG,ZFPM2,IGF1,CD44,GREM1,CTSD,IL1RN,IL6,CTSZ,CXCR2
GO: Biological Process	GO:0002639	positive regulation of immunoglobulin production				0.000253	1	0.00173	0.016	6	52	IL10,PTPRC,SASH3,IL33,CD28,IL6
GO: Biological Process	GO:0097028	dendritic cell differentiation				0.000253	1	0.00173	0.016	6	52	DCSTAMP,FCGR2B,IRF8,LGALS3,TREM2,LYN
GO: Biological Process	GO:0046006	regulation of activated T cell proliferation				0.000253	1	0.00173	0.016	6	52	LAPTM5,CLC,LILRB4,IGF1,CD86,CRTAM
GO: Biological Process	GO:0002758	innate immune response-activating signal transduction				0.000254	1	0.00174	0.0161	9	122	TYROBP,FCER1G,CLEC4A,FCN1,CLEC10A,TLR2,TLR4,LYN,HCK
GO: Biological Process	GO:0035989	tendon development				0.000261	1	0.00177	0.0164	3	8	COL5A1,COL11A1,COMP
GO: Biological Process	GO:0050859	negative regulation of B cell receptor signaling pathway				0.000261	1	0.00177	0.0164	3	8	CD300A,FCGR2B,LPXN
GO: Biological Process	GO:0043313	regulation of neutrophil degranulation				0.000261	1	0.00177	0.0164	3	8	PTAFR,ITGAM,ITGB2
GO: Biological Process	GO:0002885	positive regulation of hypersensitivity				0.000261	1	0.00177	0.0164	3	8	FCER1G,BTK,C3
GO: Biological Process	GO:2000427	positive regulation of apoptotic cell clearance				0.000261	1	0.00177	0.0164	3	8	CCL2,C3,TREM2
GO: Biological Process	GO:0051665	membrane raft localization				0.000261	1	0.00177	0.0164	3	8	PTPRC,DOCK2,CD2
GO: Biological Process	GO:0045630	positive regulation of T-helper 2 cell differentiation				0.000261	1	0.00177	0.0164	3	8	NLRP3,CD86,IL6
GO: Biological Process	GO:0034127	regulation of MyD88-independent toll-like receptor signaling pathway				0.000261	1	0.00177	0.0164	3	8	LY96,CD14,TLR4
GO: Biological Process	GO:0001562	response to protozoan				0.000264	1	0.00179	0.0165	5	34	IL10,CLEC7A,GBP2,IRF8,IL6
GO: Biological Process	GO:0019233	sensory perception of pain				0.000267	1	0.00181	0.0167	10	150	IL10,PTAFR,PTGS2,CCR2,CCL2,ALOX5,IL33,TLR4,IL1RN,CTSS
GO: Biological Process	GO:0016032	viral process				0.00027	1	0.00183	0.0169	32	962	CFH,CLEC5A,TRIM22,NRP2,CCR2,IFIH1,PTPRC,FCGR2B,CLEC4A,FCN1,MICB,C1QA,CCL2,CCL4,CCL5,CCR5,CCL8,MMP1,MMP9,DOCK2,MRC1,MDFIC,PILRA,SAMHD1,APOE,CR1,CD28,CD86,LAMP3,LYN,HCK,CXCL8
GO: Biological Process	GO:0070265	necrotic cell death				0.000273	1	0.00184	0.017	7	74	LY96,AHR,PYGL,CASP1,BIRC3,CD14,TLR4
GO: Biological Process	GO:0097305	response to alcohol				0.000277	1	0.00187	0.0172	14	273	CYBB,INHBA,CES1,PTGDR,ADCY7,S100A8,AHR,CCL7,CCR5,LEP,NLRP3,IGF1,CD14,TLR4
GO: Biological Process	GO:0010001	glial cell differentiation				0.000277	1	0.00187	0.0172	14	273	ITGAM,S100A8,S100A9,C1QA,C5AR1,IL33,IGF1,TLR2,TLR4,TREM2,DUSP10,TNFRSF1B,LYN,IL6
GO: Biological Process	GO:0033077	T cell differentiation in thymus				0.000281	1	0.00189	0.0174	8	98	HLA-DMA,PTPRC,VNN1,DOCK2,CD3G,EGR3,CD28,IL7R
GO: Biological Process	GO:0045026	plasma membrane fusion				0.000281	1	0.00189	0.0174	8	98	DCSTAMP,TYROBP,CXCL9,FOLR2,ADAM12,CD44,TREM2,CD53
GO: Biological Process	GO:0002218	activation of innate immune response				0.000282	1	0.00189	0.0175	10	151	TYROBP,FCER1G,CLEC4A,FCN1,CLEC10A,MNDA,TLR2,TLR4,LYN,HCK
GO: Biological Process	GO:0062013	positive regulation of small molecule metabolic process				0.000284	1	0.00191	0.0176	11	180	CES1,PTAFR,PTGS2,TWIST1,ADORA2B,HRH1,ANXA1,ABCG1,IGF1,CD36,TREM2
GO: Biological Process	GO:0034599	cellular response to oxidative stress				0.000293	1	0.00196	0.0181	16	342	CYBB,IL10,NCF2,NCF4,HMOX1,ITGAM,VNN1,BTK,MMP2,MMP9,ALOX5,ANXA1,NR4A2,CD36,TLR4,IL6
GO: Biological Process	GO:0032715	negative regulation of interleukin-6 production				0.000297	1	0.00196	0.0181	7	75	IL10,PTPN22,CD84,LILRB4,TLR4,IRAK3,NCKAP1L
GO: Biological Process	GO:0042093	T-helper cell differentiation				0.000297	1	0.00196	0.0181	7	75	CCR2,CCL20,ANXA1,GPR183,NLRP3,CD86,IL6
GO: Biological Process	GO:0006949	syncytium formation				0.000297	1	0.00196	0.0181	7	75	DCSTAMP,TYROBP,CXCL9,ADAM12,CD44,TREM2,CD53
GO: Biological Process	GO:1902567	negative regulation of eosinophil activation				0.000297	1	0.00196	0.0181	2	2	CD300A,CCR2
GO: Biological Process	GO:0016046	detection of fungus				0.000297	1	0.00196	0.0181	2	2	CLEC7A,TLR4
GO: Biological Process	GO:0070488	neutrophil aggregation				0.000297	1	0.00196	0.0181	2	2	S100A8,S100A9
GO: Biological Process	GO:0110090	positive regulation of hippocampal neuron apoptotic process				0.000297	1	0.00196	0.0181	2	2	ITGAM,TYROBP
GO: Biological Process	GO:0035700	astrocyte chemotaxis				0.000297	1	0.00196	0.0181	2	2	CCR2,GPR183
GO: Biological Process	GO:2000471	regulation of hematopoietic stem cell migration				0.000297	1	0.00196	0.0181	2	2	CCR2,PTPRC
GO: Biological Process	GO:2000458	regulation of astrocyte chemotaxis				0.000297	1	0.00196	0.0181	2	2	CCR2,GPR183
GO: Biological Process	GO:0032499	detection of peptidoglycan				0.000297	1	0.00196	0.0181	2	2	NOD2,TREM2
GO: Biological Process	GO:2000473	positive regulation of hematopoietic stem cell migration				0.000297	1	0.00196	0.0181	2	2	CCR2,PTPRC
GO: Biological Process	GO:0042495	detection of triacyl bacterial lipopeptide				0.000297	1	0.00196	0.0181	2	2	TLR1,TLR2
GO: Biological Process	GO:1903971	positive regulation of response to macrophage colony-stimulating factor				0.000297	1	0.00196	0.0181	2	2	TLR2,TLR4
GO: Biological Process	GO:1903974	positive regulation of cellular response to macrophage colony-stimulating factor stimulus				0.000297	1	0.00196	0.0181	2	2	TLR2,TLR4
GO: Biological Process	GO:0014068	positive regulation of phosphatidylinositol 3-kinase signaling				0.000301	1	0.00198	0.0183	8	99	PIK3CG,CCL5,FGR,LEP,IGF1,CD28,LYN,HCLS1
GO: Biological Process	GO:0010758	regulation of macrophage chemotaxis				0.000304	1	0.00199	0.0184	5	35	SLAMF8,CCL2,C3AR1,CCL5,C5AR1
GO: Biological Process	GO:0034369	plasma lipoprotein particle remodeling				0.000304	1	0.00199	0.0184	5	35	PLTP,PLA2G7,APOC1,APOE,ABCG1
GO: Biological Process	GO:0034368	protein-lipid complex remodeling				0.000304	1	0.00199	0.0184	5	35	PLTP,PLA2G7,APOC1,APOE,ABCG1
GO: Biological Process	GO:0002707	negative regulation of lymphocyte mediated immunity				0.000311	1	0.00204	0.0188	6	54	NOD2,PTPRC,FCGR2B,LILRB4,CR1,IL7R
GO: Biological Process	GO:2001185	regulation of CD8-positive, alpha-beta T cell activation				0.000329	1	0.00215	0.0199	4	20	PTPN22,LILRB4,CRTAM,NCKAP1L
GO: Biological Process	GO:0010632	regulation of epithelial cell migration				0.000338	1	0.00221	0.0204	15	312	SERPINF1,HMOX1,PTGS2,NRP2,MEOX2,ADORA2B,SRPX2,PIK3CG,FGF7,MMP9,ANXA1,APOE,IGF1,SERPINE1,DUSP10
GO: Biological Process	GO:0022411	cellular component disassembly				0.000343	1	0.00224	0.0206	25	686	HMOX1,ITGAM,DNASE2B,FAP,C1QA,C1QB,C3,MMP1,MMP2,PLEK,MMP9,MMP12,APOC1,APOE,LCP1,MSR1,LIPA,TIMP2,CD36,CD44,TREM2,IRAK3,CTSS,IL6,SOAT1
GO: Biological Process	GO:0001959	regulation of cytokine-mediated signaling pathway				0.000343	1	0.00224	0.0206	11	184	LAPTM5,PTPRC,CCL5,MMP12,CASP1,BIRC3,SAMHD1,TREM2,IRAK3,IL1RN,IL6
GO: Biological Process	GO:1900047	negative regulation of hemostasis				0.000345	1	0.00224	0.0207	6	55	FAP,PLAUR,COMP,APOE,THBD,SERPINE1
GO: Biological Process	GO:0050829	defense response to Gram-negative bacterium				0.000345	1	0.00224	0.0207	8	101	CXCL6,RNASE2,RNASE6,TLR4,SERPINE1,TREM1,LYZ,IL6
GO: Biological Process	GO:0010466	negative regulation of peptidase activity				0.000345	1	0.00224	0.0207	14	279	SERPINF1,PTGS2,C3,PLAUR,MMP9,RARRES1,CR1,IGF1,TIMP2,SERPINE1,CD44,LAMP3,CSTA,IL6
GO: Biological Process	GO:0001782	B cell homeostasis				0.000348	1	0.00226	0.0208	5	36	AHR,DOCK10,CD44,LYN,NCKAP1L
GO: Biological Process	GO:0002294	CD4-positive, alpha-beta T cell differentiation involved in immune response				0.000349	1	0.00226	0.0209	7	77	CCR2,CCL20,ANXA1,GPR183,NLRP3,CD86,IL6
GO: Biological Process	GO:0015850	organic hydroxy compound transport				0.00035	1	0.00226	0.0209	15	313	CES1,SLCO2B1,CD300A,ADORA2B,FCER1G,PLTP,APOC1,APOE,AQP9,LEP,LGALS3,MSR1,ABCG1,CD36,SOAT1
GO: Biological Process	GO:0002293	alpha-beta T cell differentiation involved in immune response				0.000378	1	0.00244	0.0225	7	78	CCR2,CCL20,ANXA1,GPR183,NLRP3,CD86,IL6
GO: Biological Process	GO:0002287	alpha-beta T cell activation involved in immune response				0.000378	1	0.00244	0.0225	7	78	CCR2,CCL20,ANXA1,GPR183,NLRP3,CD86,IL6
GO: Biological Process	GO:0042306	regulation of protein import into nucleus				0.000378	1	0.00244	0.0225	7	78	PTPN22,PTGS2,MDFIC,LEP,CD36,IL6,HCLS1
GO: Biological Process	GO:0097300	programmed necrotic cell death				0.00038	1	0.00245	0.0226	6	56	LY96,PYGL,CASP1,BIRC3,CD14,TLR4
GO: Biological Process	GO:0015918	sterol transport				0.000385	1	0.00247	0.0228	9	129	CES1,PLTP,APOC1,APOE,LEP,MSR1,ABCG1,CD36,SOAT1
GO: Biological Process	GO:0002576	platelet degranulation				0.000385	1	0.00247	0.0228	9	129	CFD,FCER1G,PLEK,PPBP,MMRN1,IGF1,CD36,SERPINE1,LYN
GO: Biological Process	GO:0043615	astrocyte cell migration				0.000387	1	0.00247	0.0228	3	9	CCR2,CCL2,GPR183
GO: Biological Process	GO:2000425	regulation of apoptotic cell clearance				0.000387	1	0.00247	0.0228	3	9	CCL2,C3,TREM2
GO: Biological Process	GO:0033007	negative regulation of mast cell activation involved in immune response				0.000387	1	0.00247	0.0228	3	9	CD300A,HMOX1,CD84
GO: Biological Process	GO:0033029	regulation of neutrophil apoptotic process				0.000387	1	0.00247	0.0228	3	9	ANXA1,CD44,CXCR2
GO: Biological Process	GO:0010912	positive regulation of isomerase activity				0.000387	1	0.00247	0.0228	3	9	ITGAM,ITGB2,NOD2
GO: Biological Process	GO:0010911	regulation of isomerase activity				0.000387	1	0.00247	0.0228	3	9	ITGAM,ITGB2,NOD2
GO: Biological Process	GO:2000108	positive regulation of leukocyte apoptotic process				0.000397	1	0.00253	0.0233	5	37	IL10,CCL5,ANXA1,CD44,LYN
GO: Biological Process	GO:0034367	protein-containing complex remodeling				0.000397	1	0.00253	0.0233	5	37	PLTP,PLA2G7,APOC1,APOE,ABCG1
GO: Biological Process	GO:0002689	negative regulation of leukocyte chemotaxis				0.000401	1	0.00255	0.0235	4	21	SLAMF8,CCL2,GPR18,GREM1
GO: Biological Process	GO:0007568	aging				0.000403	1	0.00256	0.0236	16	352	IL10,CFH,SERPINF1,BCL2A1,ITGB2,TWIST1,C1QA,CCL11,MMP2,MMP9,COMP,APOE,LEP,TIMP2,SERPINE1,TNFRSF1B
GO: Biological Process	GO:1905953	negative regulation of lipid localization				0.000409	1	0.00259	0.0239	7	79	CES1,APOC1,APOE,LEP,ABCG1,IL1RN,IL6
GO: Biological Process	GO:0032692	negative regulation of interleukin-1 production				0.000419	1	0.00266	0.0245	6	57	IL10,ACP5,LILRB4,NLRP3,IGF1,TREM2
GO: Biological Process	GO:0002495	antigen processing and presentation of peptide antigen via MHC class II				0.000421	1	0.00266	0.0246	8	104	HLA-DMA,HLA-DRB4,FCER1G,FCGR2B,MARCHF1,TREM2,CTSD,CTSS
GO: Biological Process	GO:0044057	regulation of system process				0.000437	1	0.00277	0.0255	26	738	IL10,PDE4B,INHBA,PTAFR,ITGAX,PTGS2,ADORA2B,CCN4,ADORA3,KCNE4,CLIC2,PIK3CG,KCNMA1,AHR,HRH1,MMP2,PLN,ALOX5,IL33,APOE,LEP,IGF1,TLR4,TNFRSF1B,CTSS,IL6
GO: Biological Process	GO:0045670	regulation of osteoclast differentiation				0.000441	1	0.00279	0.0257	7	80	RASSF2,TYROBP,CCR1,CCL5,LILRB4,TLR4,TREM2
GO: Biological Process	GO:0042590	antigen processing and presentation of exogenous peptide antigen via MHC class I				0.000441	1	0.00279	0.0257	7	80	CYBB,NCF2,NCF4,FCER1G,FCGR1B,CLEC4A,CD36
GO: Biological Process	GO:0030101	natural killer cell activation				0.000449	1	0.00283	0.0261	8	105	PTPN22,ITGB2,TYROBP,PTPRC,FGR,LEP,CD2,SLAMF7
GO: Biological Process	GO:0002504	antigen processing and presentation of peptide or polysaccharide antigen via MHC class II				0.000449	1	0.00283	0.0261	8	105	HLA-DMA,HLA-DRB4,FCER1G,FCGR2B,MARCHF1,TREM2,CTSD,CTSS
GO: Biological Process	GO:0032728	positive regulation of interferon-beta production				0.000451	1	0.00283	0.0261	5	38	PTPN22,TLR7,IFIH1,TLR2,TLR4
GO: Biological Process	GO:0010634	positive regulation of epithelial cell migration				0.000451	1	0.00283	0.0261	11	190	HMOX1,PTGS2,NRP2,ADORA2B,SRPX2,PIK3CG,FGF7,MMP9,ANXA1,IGF1,SERPINE1
GO: Biological Process	GO:0062197	cellular response to chemical stress				0.000472	1	0.00296	0.0273	17	393	CYBB,IL10,NCF2,NCF4,HMOX1,ITGAM,PTGS2,VNN1,BTK,MMP2,MMP9,ALOX5,ANXA1,NR4A2,CD36,TLR4,IL6
GO: Biological Process	GO:0001960	negative regulation of cytokine-mediated signaling pathway				0.000476	1	0.00299	0.0275	7	81	PTPRC,CCL5,MMP12,SAMHD1,IRAK3,IL1RN,IL6
GO: Biological Process	GO:0032930	positive regulation of superoxide anion generation				0.000484	1	0.00302	0.0278	4	22	CLEC7A,ITGAM,ITGB2,TYROBP
GO: Biological Process	GO:0140131	positive regulation of lymphocyte chemotaxis				0.000484	1	0.00302	0.0278	4	22	CCR2,CCL4,CCL5,CCL7
GO: Biological Process	GO:0010888	negative regulation of lipid storage				0.000484	1	0.00302	0.0278	4	22	CES1,LEP,ABCG1,IL6
GO: Biological Process	GO:0010875	positive regulation of cholesterol efflux				0.000484	1	0.00302	0.0278	4	22	CES1,PLTP,APOE,ABCG1
GO: Biological Process	GO:0044283	small molecule biosynthetic process				0.000484	1	0.00302	0.0278	26	743	PDE4B,MYO5A,CES1,NCF2,PTAFR,ADA2,PTGS2,SMPDL3A,HRH1,PLEK,ALOX5,PLTP,ALOX5AP,SDS,DPYD,NT5E,ANXA1,CH25H,SAMHD1,APOC1,APOE,SLC1A3,LEP,ABCG1,DHRS9,IL6
GO: Biological Process	GO:0045058	T cell selection				0.000506	1	0.00315	0.0291	6	59	HLA-DMA,PTPRC,DOCK2,CD3G,CD28,IL6
GO: Biological Process	GO:0051216	cartilage development				0.000507	1	0.00315	0.0291	12	224	CFH,CHI3L1,CCN4,COL1A1,PRRX1,COL11A1,COMP,EPYC,LEP,CD44,GREM1,LUM
GO: Biological Process	GO:0006691	leukotriene metabolic process				0.00051	1	0.00317	0.0292	5	39	DPEP2,ALOX5,ALOX5AP,TLR2,TLR4
GO: Biological Process	GO:0032481	positive regulation of type I interferon production				0.000513	1	0.00319	0.0294	7	82	PTPN22,TLR7,IFIH1,MMP12,CD14,TLR2,TLR4
GO: Biological Process	GO:0009636	response to toxic substance				0.000517	1	0.00321	0.0296	13	257	CES1,PTGS2,S100A9,CLIC2,AHR,CCL4,CCL5,ALOX5AP,NR4A2,APOE,CD36,TLR2,LYN
GO: Biological Process	GO:0051048	negative regulation of secretion				0.000527	1	0.00327	0.0301	12	225	INHBA,CD300A,HMOX1,CD84,CCR2,FCGR2B,ANXA1,APOE,LEP,TNFRSF1B,IL1RN,IL6
GO: Biological Process	GO:0002246	wound healing involved in inflammatory response				0.000546	1	0.00335	0.0309	3	10	HMOX1,CCR2,CD44
GO: Biological Process	GO:0002249	lymphocyte anergy				0.000546	1	0.00335	0.0309	3	10	CLC,LILRB4,CD86
GO: Biological Process	GO:0001915	negative regulation of T cell mediated cytotoxicity				0.000546	1	0.00335	0.0309	3	10	PTPRC,FCGR2B,IL7R
GO: Biological Process	GO:0002870	T cell anergy				0.000546	1	0.00335	0.0309	3	10	CLC,LILRB4,CD86
GO: Biological Process	GO:0002866	positive regulation of acute inflammatory response to antigenic stimulus				0.000546	1	0.00335	0.0309	3	10	FCER1G,BTK,C3
GO: Biological Process	GO:0002911	regulation of lymphocyte anergy				0.000546	1	0.00335	0.0309	3	10	CLC,LILRB4,CD86
GO: Biological Process	GO:0002667	regulation of T cell anergy				0.000546	1	0.00335	0.0309	3	10	CLC,LILRB4,CD86
GO: Biological Process	GO:2001187	positive regulation of CD8-positive, alpha-beta T cell activation				0.000546	1	0.00335	0.0309	3	10	PTPN22,LILRB4,NCKAP1L
GO: Biological Process	GO:0046579	positive regulation of Ras protein signal transduction				0.000552	1	0.00339	0.0313	7	83	PIK3CG,VAV1,DOCK2,GPR18,GPR65,IGF1,LYN
GO: Biological Process	GO:0048016	inositol phosphate-mediated signaling				0.000569	1	0.00349	0.0322	10	165	HRH1,C3AR1,GNA15,C5AR1,GPR18,GPR65,FPR1,FPR3,IGF1,CXCR2
GO: Biological Process	GO:0045589	regulation of regulatory T cell differentiation				0.000574	1	0.00352	0.0325	5	40	LILRB4,CR1,CD28,CD44,DUSP10
GO: Biological Process	GO:0045761	regulation of adenylate cyclase activity				0.000576	1	0.00352	0.0325	13	260	PDE4B,P2RY13,ADGRE2,ADCY7,CCR2,ADORA2B,CXCL9,GNA15,PLN,GPR65,FPR1,RGS1,TIMP2
GO: Biological Process	GO:0071605	monocyte chemotactic protein-1 production				0.000578	1	0.00352	0.0325	4	23	CLEC7A,TWIST1,NOD2,CD84
GO: Biological Process	GO:0071637	regulation of monocyte chemotactic protein-1 production				0.000578	1	0.00352	0.0325	4	23	CLEC7A,TWIST1,NOD2,CD84
GO: Biological Process	GO:0071404	cellular response to low-density lipoprotein particle stimulus				0.000578	1	0.00352	0.0325	4	23	CES1,ITGB2,FCER1G,CD36
GO: Biological Process	GO:0002643	regulation of tolerance induction				0.000578	1	0.00352	0.0325	4	23	CLC,LILRB4,CD86,IRAK3
GO: Biological Process	GO:0007398	ectoderm development				0.000593	1	0.00361	0.0333	12	228	IL10,INHBA,GATA6,ITGA4,ITGAM,ITGB2,MMP2,MMP9,COL5A1,COL8A1,COL11A1,IL1RN
GO: Biological Process	GO:1904589	regulation of protein import				0.000594	1	0.00361	0.0333	7	84	PTPN22,PTGS2,MDFIC,LEP,CD36,IL6,HCLS1
GO: Biological Process	GO:0032479	regulation of type I interferon production				0.000598	1	0.00363	0.0335	9	137	IL10,PTPN22,TLR7,IFIH1,MMP12,IRF8,CD14,TLR2,TLR4
GO: Biological Process	GO:0042310	vasoconstriction				0.000612	1	0.00371	0.0343	8	110	PTAFR,PTGS2,AHR,HRH1,MMP2,ALOX5,COMP,LEP
GO: Biological Process	GO:0031295	T cell costimulation				0.000661	1	0.004	0.0369	6	62	VAV1,LILRB4,MAP3K8,CD28,CD86,LYN
GO: Biological Process	GO:0001649	osteoblast differentiation				0.000664	1	0.00402	0.0371	13	264	RASSF2,CLEC5A,TCIRG1,TWIST1,CCN4,AHR,COL1A1,AREG,IGF1,LOX,VCAN,GREM1,IL6
GO: Biological Process	GO:0010035	response to inorganic substance				0.000668	1	0.00404	0.0372	23	637	CYBB,IL10,CYBRD1,SERPINF1,TCIRG1,HMOX1,ADCY7,FABP4,S100A8,KCNMA1,C1QA,MMP2,MMP9,PLN,ALOX5AP,COL1A1,ANXA1,NR4A2,SLC1A3,AQP9,CD14,CD36,IL6
GO: Biological Process	GO:0010759	positive regulation of macrophage chemotaxis				0.000684	1	0.00412	0.038	4	24	CCL2,C3AR1,CCL5,C5AR1
GO: Biological Process	GO:0002902	regulation of B cell apoptotic process				0.000684	1	0.00412	0.038	4	24	IL10,BTK,CD44,LYN
GO: Biological Process	GO:0060761	negative regulation of response to cytokine stimulus				0.000684	1	0.00412	0.038	7	86	PTPRC,CCL5,MMP12,SAMHD1,IRAK3,IL1RN,IL6
GO: Biological Process	GO:0031623	receptor internalization				0.000699	1	0.0042	0.0388	9	140	ITGB2,FCER1G,LILRB4,SELE,SFRP4,CD36,GREM1,CXCL8,CXCR2
GO: Biological Process	GO:0014066	regulation of phosphatidylinositol 3-kinase signaling				0.000699	1	0.0042	0.0388	9	140	TWIST1,PIK3CG,CCL5,FGR,LEP,IGF1,CD28,LYN,HCLS1
GO: Biological Process	GO:0001912	positive regulation of leukocyte mediated cytotoxicity				0.00072	1	0.00432	0.0399	6	63	ITGAM,TYROBP,PTPRC,CCL2,VAV1,CRTAM
GO: Biological Process	GO:1903307	positive regulation of regulated secretory pathway				0.00072	1	0.00432	0.0399	6	63	PTAFR,ITGAM,ITGB2,ADORA2B,FCER1G,FGR
GO: Biological Process	GO:0071496	cellular response to external stimulus				0.000729	1	0.00437	0.0403	15	336	TLR7,HMOX1,ITGA4,ADORA2B,PTPRC,MMP9,COL1A1,FOLR2,NR4A2,CASP1,LEP,POSTN,PIEZO2,TLR4,LYN
GO: Biological Process	GO:0006812	cation transport				0.000731	1	0.00438	0.0404	40	1376	PDE4B,MYO5A,CD300A,TCIRG1,PTPN22,GEM,PTGS2,TWIST1,CD84,CCR2,KCNE4,PTPRC,FCER1G,CLIC2,PIK3CG,BTK,CXCL9,KCNMA1,AHR,HRH1,CCL2,CCR1,CCL4,CCL5,CCR5,CCL8,MMP9,PLN,ALOX5,STEAP1,SLC31A2,SLC1A3,LGALS3,IGF1,PIEZO2,SERPINE1,TREM2,LYN,SLC38A6,CTSS
GO: Biological Process	GO:0046645	positive regulation of gamma-delta T cell activation				0.000741	1	0.00442	0.0408	3	11	NOD2,PTPRC,NCKAP1L
GO: Biological Process	GO:0071492	cellular response to UV-A				0.000741	1	0.00442	0.0408	3	11	MMP1,MMP2,MMP9
GO: Biological Process	GO:0002604	regulation of dendritic cell antigen processing and presentation				0.000741	1	0.00442	0.0408	3	11	FGL2,NOD2,FCGR2B
GO: Biological Process	GO:0060346	bone trabecula formation				0.000741	1	0.00442	0.0408	3	11	MMP2,COL1A1,GREM1
GO: Biological Process	GO:0043271	negative regulation of ion transport				0.000758	1	0.00451	0.0416	17	410	CD300A,GEM,PTGS2,TWIST1,KCNE4,CLIC2,AHR,MMP9,PLN,MDFIC,SFRP4,ANXA1,APOC1,APOE,LEP,CD36,IL1RN
GO: Biological Process	GO:0032606	type I interferon production				0.000773	1	0.0046	0.0424	9	142	IL10,PTPN22,TLR7,IFIH1,MMP12,IRF8,CD14,TLR2,TLR4
GO: Biological Process	GO:0006958	complement activation, classical pathway				0.000773	1	0.0046	0.0424	9	142	C1QA,C1QB,C1R,C1S,C3,CR1,IGKC,IGLC1,TRBC1
GO: Biological Process	GO:0014009	glial cell proliferation				0.000783	1	0.00464	0.0428	6	64	IL33,AREG,IGF1,TREM2,LYN,IL6
GO: Biological Process	GO:0031294	lymphocyte costimulation				0.000783	1	0.00464	0.0428	6	64	VAV1,LILRB4,MAP3K8,CD28,CD86,LYN
GO: Biological Process	GO:0045620	negative regulation of lymphocyte differentiation				0.000783	1	0.00464	0.0428	6	64	INHBA,FGL2,LILRB4,ANXA1,CR1,CD44
GO: Biological Process	GO:0019229	regulation of vasoconstriction				0.000785	1	0.00465	0.0429	7	88	PTAFR,PTGS2,AHR,HRH1,MMP2,ALOX5,LEP
GO: Biological Process	GO:1903829	positive regulation of cellular protein localization				0.000798	1	0.00472	0.0435	15	339	MYO5A,PTPN22,ITGAM,ITGB2,PTGS2,TYROBP,FCER1G,CCL2,RAC2,LEP,LGALS3,GZMB,TREM2,IL6,HCLS1
GO: Biological Process	GO:0046641	positive regulation of alpha-beta T cell proliferation				0.000803	1	0.00474	0.0437	4	25	PTPN22,CCR2,PTPRC,CD28
GO: Biological Process	GO:0050860	negative regulation of T cell receptor signaling pathway				0.000803	1	0.00474	0.0437	4	25	PTPN22,LAPTM5,LILRB4,LGALS3
GO: Biological Process	GO:0051043	regulation of membrane protein ectodomain proteolysis				0.000803	1	0.00474	0.0437	4	25	IL10,APOE,TIMP2,TNFRSF1B
GO: Biological Process	GO:0031670	cellular response to nutrient				0.000806	1	0.00474	0.0437	5	43	HMOX1,COL1A1,FOLR2,LEP,POSTN
GO: Biological Process	GO:0046640	regulation of alpha-beta T cell proliferation				0.000806	1	0.00474	0.0437	5	43	PTPN22,CCR2,PTPRC,CD28,CD44
GO: Biological Process	GO:0031532	actin cytoskeleton reorganization				0.000821	1	0.00483	0.0445	8	115	S100A9,FGF7,PLEK,GPR65,ANXA1,HCK,HCLS1,PHACTR1
GO: Biological Process	GO:0031960	response to corticosteroid				0.000858	1	0.00503	0.0464	10	174	CYBB,IL10,SERPINF1,PTAFR,KCNMA1,COL1A1,ANXA1,AREG,IL1RN,IL6
GO: Biological Process	GO:0070340	detection of bacterial lipopeptide				0.000867	1	0.00503	0.0464	2	3	TLR1,TLR2
GO: Biological Process	GO:0001812	positive regulation of type I hypersensitivity				0.000867	1	0.00503	0.0464	2	3	FCER1G,BTK
GO: Biological Process	GO:0001802	type III hypersensitivity				0.000867	1	0.00503	0.0464	2	3	FCER1G,BTK
GO: Biological Process	GO:0001803	regulation of type III hypersensitivity				0.000867	1	0.00503	0.0464	2	3	FCER1G,BTK
GO: Biological Process	GO:0001805	positive regulation of type III hypersensitivity				0.000867	1	0.00503	0.0464	2	3	FCER1G,BTK
GO: Biological Process	GO:1904149	regulation of microglial cell mediated cytotoxicity				0.000867	1	0.00503	0.0464	2	3	ITGAM,TYROBP
GO: Biological Process	GO:1904151	positive regulation of microglial cell mediated cytotoxicity				0.000867	1	0.00503	0.0464	2	3	ITGAM,TYROBP
GO: Biological Process	GO:0090634	microglial cell mediated cytotoxicity				0.000867	1	0.00503	0.0464	2	3	ITGAM,TYROBP
GO: Biological Process	GO:0045957	negative regulation of complement activation, alternative pathway				0.000867	1	0.00503	0.0464	2	3	VSIG4,CR1
GO: Biological Process	GO:0002752	cell surface pattern recognition receptor signaling pathway				0.000867	1	0.00503	0.0464	2	3	FCN1,TLR2
GO: Biological Process	GO:0001970	positive regulation of activation of membrane attack complex				0.000867	1	0.00503	0.0464	2	3	C3,CR1
GO: Biological Process	GO:0090265	positive regulation of immune complex clearance by monocytes and macrophages				0.000867	1	0.00503	0.0464	2	3	CCR2,CCL2
GO: Biological Process	GO:0070201	regulation of establishment of protein localization				0.000879	1	0.00509	0.047	24	691	TCIRG1,PTPN22,ITGAM,ITGB2,PTGS2,CCL2,CCL5,ALOX5,RAC2,MDFIC,ANXA1,APOE,LCP1,LEP,ABCG1,IGF1,CD36,TLR2,GZMB,TLR4,TREM2,CTSD,IL6,HCLS1
GO: Biological Process	GO:0043409	negative regulation of MAPK cascade				0.000883	1	0.00511	0.0471	11	206	CD300A,PTPN22,PTPRC,LILRB4,SFRP4,APOE,IGF1,TLR4,IRAK3,DUSP10,LYN
GO: Biological Process	GO:0045861	negative regulation of proteolysis				0.00089	1	0.00515	0.0475	16	379	IL10,SERPINF1,PTGS2,C3,PLAUR,MMP9,RARRES1,CR1,IGF1,TIMP2,SERPINE1,CD44,LAMP3,CSTA,IL6,CTSZ
GO: Biological Process	GO:0032660	regulation of interleukin-17 production				0.000897	1	0.00516	0.0476	5	44	NOD2,TLR2,TLR4,IL6,NCKAP1L
GO: Biological Process	GO:0002691	regulation of cellular extravasation				0.000897	1	0.00516	0.0476	5	44	ITGA4,PTAFR,CCR2,CCL2,SELE
GO: Biological Process	GO:0045066	regulatory T cell differentiation				0.000897	1	0.00516	0.0476	5	44	LILRB4,CR1,CD28,CD44,DUSP10
GO: Biological Process	GO:0030890	positive regulation of B cell proliferation				0.000897	1	0.00516	0.0476	5	44	PTPRC,SASH3,GPR183,TLR4,NCKAP1L
GO: Biological Process	GO:0051057	positive regulation of small GTPase mediated signal transduction				0.000898	1	0.00516	0.0476	7	90	PIK3CG,VAV1,DOCK2,GPR18,GPR65,IGF1,LYN
GO: Biological Process	GO:0045596	negative regulation of cell differentiation				0.000914	1	0.00526	0.0485	26	776	EREG,INHBA,FGL2,TWIST1,CCN4,FCGR2B,AHR,CCL11,GPR171,MMP9,LILRB4,COL5A1,ANXA1,RUNX1T1,CR1,AREG,ZFPM2,POSTN,ABCG1,IGF1,TLR4,CD44,DUSP10,GREM1,LYN,IL6
GO: Biological Process	GO:0033344	cholesterol efflux				0.000923	1	0.0053	0.0489	6	66	CES1,PLTP,APOC1,APOE,ABCG1,SOAT1
GO: Biological Process	GO:0032693	negative regulation of interleukin-10 production				0.000937	1	0.00537	0.0495	4	26	CD84,TYROBP,FCGR2B,LILRB4
GO: Biological Process	GO:0042730	fibrinolysis				0.000937	1	0.00537	0.0495	4	26	FAP,PLAUR,THBD,SERPINE1
GO: Biological Process	GO:0070302	regulation of stress-activated protein kinase signaling cascade				0.000955	1	0.00547	0.0504	11	208	RASSF2,CLEC7A,PTPN22,NOD2,FCGR2B,SFRP4,LEP,TLR4,DUSP10,GREM1,LYN
GO: Biological Process	GO:0043154	negative regulation of cysteine-type endopeptidase activity involved in apoptotic process				0.000958	1	0.00548	0.0505	7	91	PTGS2,PLAUR,MMP9,IGF1,CD44,LAMP3,IL6
GO: Biological Process	GO:0002003	angiotensin maturation				0.000975	1	0.00554	0.0511	3	12	CES1,CPA3,CTSZ
GO: Biological Process	GO:0036005	response to macrophage colony-stimulating factor				0.000975	1	0.00554	0.0511	3	12	DCSTAMP,TLR2,TLR4
GO: Biological Process	GO:0036006	cellular response to macrophage colony-stimulating factor stimulus				0.000975	1	0.00554	0.0511	3	12	DCSTAMP,TLR2,TLR4
GO: Biological Process	GO:0002676	regulation of chronic inflammatory response				0.000975	1	0.00554	0.0511	3	12	IL10,ADORA2B,CCL5
GO: Biological Process	GO:0033089	positive regulation of T cell differentiation in thymus				0.000975	1	0.00554	0.0511	3	12	VNN1,EGR3,IL7R
GO: Biological Process	GO:0045586	regulation of gamma-delta T cell differentiation				0.000975	1	0.00554	0.0511	3	12	PTPRC,EGR3,NCKAP1L
GO: Biological Process	GO:0034135	regulation of toll-like receptor 2 signaling pathway				0.000975	1	0.00554	0.0511	3	12	NOD2,TLR1,LYN
GO: Biological Process	GO:0006022	aminoglycan metabolic process				0.000978	1	0.00555	0.0512	10	177	CHI3L1,CHIT1,HPSE,HS3ST2,KERA,OMD,OGN,VCAN,CD44,LUM
GO: Biological Process	GO:2001257	regulation of cation channel activity				0.000993	1	0.00563	0.0519	11	209	PDE4B,MYO5A,GEM,CCR2,KCNE4,CLIC2,CCL2,MMP9,PLN,TREM2,CTSS
GO: Biological Process	GO:0043368	positive T cell selection				0.000995	1	0.00563	0.0519	5	45	HLA-DMA,PTPRC,DOCK2,CD3G,IL6
GO: Biological Process	GO:0032964	collagen biosynthetic process				0.000999	1	0.00565	0.0521	6	67	ADORA2B,CCL2,COL1A1,COL5A1,SERPINE1,IL6
GO: Biological Process	GO:0048511	rhythmic process				0.00101	1	0.0057	0.0526	15	347	EREG,INHBA,SERPINF1,TWIST1,KCNMA1,AHR,HRH1,HS3ST2,DPYD,ANXA1,LEP,IGF1,EGR3,SERPINE1,IL6
GO: Biological Process	GO:0009887	animal organ morphogenesis				0.00101	1	0.00571	0.0527	37	1263	CFH,EREG,MYO5A,INHBA,ASPN,ACP5,GATA6,ACTG2,TCIRG1,ITGAX,TWIST1,NRP2,AHR,CCL2,FGF7,CCL11,MMP2,FGR,COL1A1,COL1A2,COL5A1,COL8A1,COL8A2,PRRX1,COL11A1,SFRP4,COMP,AREG,ZFPM2,MFAP5,IGF1,SERPINE1,CD44,GREM1,CTSD,IL6,CTSZ
GO: Biological Process	GO:0009612	response to mechanical stimulus				0.00103	1	0.00583	0.0537	12	243	TLR7,CHI3L1,MMP2,COL1A1,COL11A1,CASP1,SLC1A3,POSTN,IGF1,PIEZO2,CD36,TLR4
GO: Biological Process	GO:0022898	regulation of transmembrane transporter activity				0.00103	1	0.00583	0.0537	14	312	PDE4B,MYO5A,PTAFR,GEM,TWIST1,CCR2,KCNE4,CLIC2,CCL2,MMP9,PLN,ALOX5,TREM2,CTSS
GO: Biological Process	GO:0031279	regulation of cyclase activity				0.00107	1	0.00601	0.0554	13	278	PDE4B,P2RY13,ADGRE2,ADCY7,CCR2,ADORA2B,CXCL9,GNA15,PLN,GPR65,FPR1,RGS1,TIMP2
GO: Biological Process	GO:0048143	astrocyte activation				0.00109	1	0.0061	0.0562	4	27	C1QA,C5AR1,TREM2,IL6
GO: Biological Process	GO:1901565	organonitrogen compound catabolic process				0.00109	1	0.0061	0.0562	40	1405	NPL,IL10,PDE4B,TCIRG1,NCF2,HMOX1,CHI3L1,CHIT1,HPSE,ADA2,LAPTM5,FAP,SMPDL3A,GM2A,MMP12,IL33,SDS,PLA2G7,DPYD,NT5E,KERA,SAMHD1,APOC1,TDO2,APOE,OMD,OGN,TIMP2,VCAN,GZMA,GZMB,CD44,TREM2,LAMP3,IRAK3,LUM,TNFRSF1B,CTSD,CTSS,CTSZ
GO: Biological Process	GO:0019218	regulation of steroid metabolic process				0.00109	1	0.00611	0.0563	9	149	CES1,ADORA2B,KCNMA1,HRH1,APOC1,APOE,LEP,ABCG1,IGF1
GO: Biological Process	GO:0070266	necroptotic process				0.0011	1	0.00617	0.0569	5	46	LY96,PYGL,BIRC3,CD14,TLR4
GO: Biological Process	GO:0001704	formation of primary germ layer				0.00111	1	0.00621	0.0573	11	212	IL10,INHBA,GATA6,ITGA4,ITGB2,MMP2,MMP9,COL5A1,COL8A1,COL11A1,IL1RN
GO: Biological Process	GO:0001705	ectoderm formation				0.00111	1	0.00621	0.0573	11	212	IL10,INHBA,GATA6,ITGA4,ITGB2,MMP2,MMP9,COL5A1,COL8A1,COL11A1,IL1RN
GO: Biological Process	GO:0001706	endoderm formation				0.00111	1	0.00621	0.0573	11	212	IL10,INHBA,GATA6,ITGA4,ITGB2,MMP2,MMP9,COL5A1,COL8A1,COL11A1,IL1RN
GO: Biological Process	GO:0001707	mesoderm formation				0.00111	1	0.00621	0.0573	11	212	IL10,INHBA,GATA6,ITGA4,ITGB2,MMP2,MMP9,COL5A1,COL8A1,COL11A1,IL1RN
GO: Biological Process	GO:0048017	inositol lipid-mediated signaling				0.00111	1	0.00621	0.0573	11	212	PTAFR,TWIST1,PIK3CG,CCL5,FGR,LEP,IGF1,CD28,LYN,HCLS1,ADAP2
GO: Biological Process	GO:0007369	gastrulation				0.00111	1	0.00621	0.0573	11	212	IL10,INHBA,GATA6,ITGA4,ITGB2,MMP2,MMP9,COL5A1,COL8A1,COL11A1,IL1RN
GO: Biological Process	GO:0051223	regulation of protein transport				0.00112	1	0.00621	0.0573	23	662	TCIRG1,PTPN22,ITGAM,ITGB2,PTGS2,CCL2,CCL5,ALOX5,RAC2,MDFIC,ANXA1,APOE,LCP1,LEP,ABCG1,IGF1,CD36,TLR2,GZMB,TLR4,TREM2,IL6,HCLS1
GO: Biological Process	GO:0045471	response to ethanol				0.00114	1	0.00634	0.0585	9	150	CYBB,ADCY7,S100A8,CCL7,LEP,NLRP3,IGF1,CD14,TLR4
GO: Biological Process	GO:0048708	astrocyte differentiation				0.00116	1	0.00645	0.0595	7	94	S100A8,S100A9,C1QA,C5AR1,TLR4,TREM2,IL6
GO: Biological Process	GO:0002381	immunoglobulin production involved in immunoglobulin-mediated immune response				0.00117	1	0.00647	0.0597	6	69	IL10,FGL2,NOD2,PTPRC,BTK,CD28
GO: Biological Process	GO:0006508	proteolysis				0.00117	1	0.0065	0.06	50	1881	IL10,CES1,SERPINF1,CLEC7A,PTGS2,FGL2,LAPTM5,IFIH1,S100A8,S100A9,CFD,FAP,ADAMDEC1,DPEP2,C1R,C1S,C3,PLAUR,MMP1,MMP2,MMP9,MMP12,IL33,RARRES1,COMP,CASP1,BIRC3,CPA3,CPM,APOE,CR1,ADAM12,OLR1,NLRP3,IGF1,TIMP2,GZMA,GZMB,GZMK,SERPINE1,CD44,TREM2,LAMP3,CSTA,TNFRSF1B,LYN,CTSD,CTSS,IL6,CTSZ
GO: Biological Process	GO:0090087	regulation of peptide transport				0.00118	1	0.00652	0.0601	24	706	TCIRG1,PTPN22,ITGAM,ITGB2,PTGS2,S100A8,CCL2,CCL5,ALOX5,RAC2,MDFIC,ANXA1,APOE,LCP1,LEP,ABCG1,IGF1,CD36,TLR2,GZMB,TLR4,TREM2,IL6,HCLS1
GO: Biological Process	GO:0048332	mesoderm morphogenesis				0.0012	1	0.00665	0.0614	11	214	IL10,INHBA,GATA6,ITGA4,ITGB2,MMP2,MMP9,COL5A1,COL8A1,COL11A1,IL1RN
GO: Biological Process	GO:0032691	negative regulation of interleukin-1 beta production				0.00121	1	0.00671	0.0619	5	47	ACP5,LILRB4,NLRP3,IGF1,TREM2
GO: Biological Process	GO:0051339	regulation of lyase activity				0.00122	1	0.00671	0.0619	13	282	PDE4B,P2RY13,ADGRE2,ADCY7,CCR2,ADORA2B,CXCL9,GNA15,PLN,GPR65,FPR1,RGS1,TIMP2
GO: Biological Process	GO:0002042	cell migration involved in sprouting angiogenesis				0.00123	1	0.00681	0.0628	7	95	HMOX1,PTGS2,MEOX2,SRPX2,ANXA1,EGR3,GREM1
GO: Biological Process	GO:0031098	stress-activated protein kinase signaling cascade				0.00124	1	0.00682	0.0629	14	318	RASSF2,CLEC7A,PTPN22,NOD2,ADORA2B,FCGR2B,MDFIC,SFRP4,MAP3K8,LEP,TLR4,DUSP10,GREM1,LYN
GO: Biological Process	GO:0018146	keratan sulfate biosynthetic process				0.00125	1	0.00682	0.0629	4	28	KERA,OMD,OGN,LUM
GO: Biological Process	GO:0002719	negative regulation of cytokine production involved in immune response				0.00125	1	0.00682	0.0629	4	28	IL10,HMOX1,LILRB4,IRAK3
GO: Biological Process	GO:1900017	positive regulation of cytokine production involved in inflammatory response				0.00125	1	0.00682	0.0629	4	28	CLEC7A,NOD2,TLR4,IL6
GO: Biological Process	GO:0032908	regulation of transforming growth factor beta1 production				0.00125	1	0.00682	0.0629	3	13	GATA6,TYROBP,LUM
GO: Biological Process	GO:0045348	positive regulation of MHC class II biosynthetic process				0.00125	1	0.00682	0.0629	3	13	IL10,IL33,TLR4
GO: Biological Process	GO:0002002	regulation of angiotensin levels in blood				0.00125	1	0.00682	0.0629	3	13	CES1,CPA3,CTSZ
GO: Biological Process	GO:0097278	complement-dependent cytotoxicity				0.00125	1	0.00682	0.0629	3	13	IL10,CFH,C3
GO: Biological Process	GO:0001660	fever generation				0.00125	1	0.00682	0.0629	3	13	PTGS2,CCL5,IL1RN
GO: Biological Process	GO:2000343	positive regulation of chemokine (C-X-C motif) ligand 2 production				0.00125	1	0.00682	0.0629	3	13	CCL5,POSTN,TLR4
GO: Biological Process	GO:0045906	negative regulation of vasoconstriction				0.00125	1	0.00682	0.0629	3	13	AHR,MMP2,LEP
GO: Biological Process	GO:0046348	amino sugar catabolic process				0.00125	1	0.00682	0.0629	3	13	NPL,CHI3L1,CHIT1
GO: Biological Process	GO:0051549	positive regulation of keratinocyte migration				0.00125	1	0.00682	0.0629	3	13	FGF7,MMP9,SERPINE1
GO: Biological Process	GO:1902532	negative regulation of intracellular signal transduction				0.00126	1	0.00684	0.0631	23	668	RASSF2,CD300A,PTPN22,PTGS2,ADCY7,TWIST1,PTPRC,VNN1,PLAUR,PLEK,MMP9,LILRB4,SFRP4,APOE,RGS1,NLRP3,IGF1,TIMP2,TLR4,CD44,IRAK3,DUSP10,LYN
GO: Biological Process	GO:0071407	cellular response to organic cyclic compound				0.00128	1	0.00697	0.0643	22	628	IL10,PDE4B,INHBA,CES1,SERPINF1,P2RY13,PTAFR,NOD2,IFIH1,PIK3CG,AHR,HRH1,CCL2,CCL5,GNA15,MMP2,COL1A1,ANXA1,FOLR2,SLC1A3,AQP9,IGF1
GO: Biological Process	GO:0007169	transmembrane receptor protein tyrosine kinase signaling pathway				0.00129	1	0.00701	0.0647	26	795	CYBB,EREG,RASSF2,TCIRG1,NCF2,NCF4,NRP2,PTPRE,TRAT1,CCL2,FGF7,PLAUR,MMP2,FGR,MMP9,VAV1,COL1A1,LCP2,LEP,AREG,IGF1,LOX,GREM1,LYN,HCK,NCKAP1L
GO: Biological Process	GO:1903169	regulation of calcium ion transmembrane transport				0.00131	1	0.00712	0.0657	10	184	PDE4B,MYO5A,PTPN22,GEM,CLIC2,PIK3CG,CXCL9,AHR,PLN,LYN
GO: Biological Process	GO:0032269	negative regulation of cellular protein metabolic process				0.00131	1	0.00713	0.0657	34	1146	IL10,RASSF2,CD300A,SERPINF1,PTPN22,SAMSN1,PTGS2,FABP4,TWIST1,PTPRC,C3,PLAUR,MMP9,LILRB4,NIBAN1,RARRES1,APOE,CR1,LGALS3,IGF1,TIMP2,GZMB,SERPINE1,CD44,LAMP3,CSTA,IRAK3,DUSP10,GREM1,LYN,IL6,CTSZ,NCKAP1L,PHACTR1
GO: Biological Process	GO:0032814	regulation of natural killer cell activation				0.00134	1	0.00724	0.0668	5	48	PTPN22,TYROBP,FGR,LEP,SLAMF7
GO: Biological Process	GO:0033157	regulation of intracellular protein transport				0.00138	1	0.00746	0.0688	13	286	PTPN22,ITGAM,ITGB2,PTGS2,CCL2,RAC2,MDFIC,LCP1,LEP,CD36,GZMB,IL6,HCLS1
GO: Biological Process	GO:1904892	regulation of receptor signaling pathway via STAT				0.00141	1	0.00763	0.0704	8	125	IL10,IL10RA,CD300A,PTPRC,CCL5,LEP,IL6,IL7R
GO: Biological Process	GO:0031664	regulation of lipopolysaccharide-mediated signaling pathway				0.00143	1	0.00772	0.0712	4	29	LY96,CD84,LY86,CD36
GO: Biological Process	GO:0045667	regulation of osteoblast differentiation				0.00143	1	0.00774	0.0714	9	155	RASSF2,TCIRG1,TWIST1,CCN4,AHR,AREG,IGF1,GREM1,IL6
GO: Biological Process	GO:0050918	positive chemotaxis				0.00146	1	0.00786	0.0725	6	72	SCG2,FGF7,CCL5,GPNMB,LGALS3,CXCL8
GO: Biological Process	GO:0034109	homotypic cell-cell adhesion				0.00157	1	0.00841	0.0775	7	99	CFH,PIK3CG,CCL5,PLAUR,PLEK,COMP,LYN
GO: Biological Process	GO:0032905	transforming growth factor beta1 production				0.00157	1	0.00841	0.0775	3	14	GATA6,TYROBP,LUM
GO: Biological Process	GO:0070424	regulation of nucleotide-binding oligomerization domain containing signaling pathway				0.00157	1	0.00841	0.0775	3	14	PTPN22,BIRC3,TLR4
GO: Biological Process	GO:0002921	negative regulation of humoral immune response				0.00157	1	0.00841	0.0775	3	14	VSIG4,FCGR2B,CR1
GO: Biological Process	GO:0051917	regulation of fibrinolysis				0.00157	1	0.00841	0.0775	3	14	FAP,THBD,SERPINE1
GO: Biological Process	GO:0045060	negative thymic T cell selection				0.00157	1	0.00841	0.0775	3	14	PTPRC,DOCK2,CD28
GO: Biological Process	GO:0046085	adenosine metabolic process				0.00157	1	0.00841	0.0775	3	14	PTGDR,ADA2,NT5E
GO: Biological Process	GO:0010872	regulation of cholesterol esterification				0.00157	1	0.00841	0.0775	3	14	APOC1,APOE,ABCG1
GO: Biological Process	GO:0033700	phospholipid efflux				0.00157	1	0.00841	0.0775	3	14	APOC1,APOE,ABCG1
GO: Biological Process	GO:0002551	mast cell chemotaxis				0.00157	1	0.00841	0.0775	3	14	CCL5,CCL11,RAC2
GO: Biological Process	GO:0071695	anatomical structure maturation				0.00161	1	0.00857	0.0791	13	291	EREG,MYO5A,CLEC7A,PTGS2,BTK,KCNMA1,C1QA,C3,MMP2,NR4A2,LEP,IGF1,GREM1
GO: Biological Process	GO:0035886	vascular associated smooth muscle cell differentiation				0.00161	1	0.00857	0.0791	5	50	CFH,GATA6,CFD,C3,COMP
GO: Biological Process	GO:0032620	interleukin-17 production				0.00161	1	0.00857	0.0791	5	50	NOD2,TLR2,TLR4,IL6,NCKAP1L
GO: Biological Process	GO:0090066	regulation of anatomical structure size				0.00163	1	0.00865	0.0798	21	599	PTAFR,PTGS2,PRR16,ADORA2B,CYRIA,KCNMA1,AHR,HRH1,CCL11,MMP2,PLEK,ALOX5,VAV1,COMP,APOE,LEP,TLR2,HCK,HCLS1,IL7R,NCKAP1L
GO: Biological Process	GO:0035666	TRIF-dependent toll-like receptor signaling pathway				0.00163	1	0.00865	0.0798	4	30	LY96,BIRC3,CD14,TLR4
GO: Biological Process	GO:0008585	female gonad development				0.00164	1	0.00872	0.0804	8	128	EREG,INHBA,AHR,FGF7,MMP2,LEP,ZFPM2,SERPINE1
GO: Biological Process	GO:0032409	regulation of transporter activity				0.00166	1	0.00879	0.0811	14	328	PDE4B,MYO5A,PTAFR,GEM,TWIST1,CCR2,KCNE4,CLIC2,CCL2,MMP9,PLN,ALOX5,TREM2,CTSS
GO: Biological Process	GO:0002474	antigen processing and presentation of peptide antigen via MHC class I				0.00166	1	0.00882	0.0814	7	100	CYBB,NCF2,NCF4,FCER1G,FCGR1B,CLEC4A,CD36
GO: Biological Process	GO:0060429	epithelium development				0.00168	1	0.00888	0.082	42	1532	IL10,CFH,EREG,MYO5A,INHBA,CES1,GATA6,ITGA4,HPSE,ITGAX,PTGS2,ZEB2,TWIST1,MEOX2,KCNMA1,AHR,FGF7,C3,PLAUR,CCL11,MMP2,MMP9,MMP12,COL5A1,SFRP4,COL15A1,ANXA1,LCP1,AREG,LGALS3,IGF1,VCAN,DHRS9,SERPINE1,CD44,CSTA,DUSP10,GREM1,CTSD,IL6,CTSZ,CXCR2
GO: Biological Process	GO:0042531	positive regulation of tyrosine phosphorylation of STAT protein				0.00168	1	0.00888	0.082	6	74	CCL5,LEP,IGF1,LYN,IL6,HCLS1
GO: Biological Process	GO:1902566	regulation of eosinophil activation				0.00171	1	0.0089	0.0821	2	4	CD300A,CCR2
GO: Biological Process	GO:1902523	positive regulation of protein K63-linked ubiquitination				0.00171	1	0.0089	0.0821	2	4	PTPN22,NOD2
GO: Biological Process	GO:0001798	positive regulation of type IIa hypersensitivity				0.00171	1	0.0089	0.0821	2	4	FCER1G,C3
GO: Biological Process	GO:0001766	membrane raft polarization				0.00171	1	0.0089	0.0821	2	4	DOCK2,CD2
GO: Biological Process	GO:0060244	negative regulation of cell proliferation involved in contact inhibition				0.00171	1	0.0089	0.0821	2	4	FAP,SRPX
GO: Biological Process	GO:0002351	serotonin production involved in inflammatory response				0.00171	1	0.0089	0.0821	2	4	CD300A,FCER1G
GO: Biological Process	GO:0002894	positive regulation of type II hypersensitivity				0.00171	1	0.0089	0.0821	2	4	FCER1G,C3
GO: Biological Process	GO:0034465	response to carbon monoxide				0.00171	1	0.0089	0.0821	2	4	IL10,KCNMA1
GO: Biological Process	GO:1904093	negative regulation of autophagic cell death				0.00171	1	0.0089	0.0821	2	4	LAPTM5,TREM2
GO: Biological Process	GO:0071226	cellular response to molecule of fungal origin				0.00171	1	0.0089	0.0821	2	4	CLEC7A,BTK
GO: Biological Process	GO:0002605	negative regulation of dendritic cell antigen processing and presentation				0.00171	1	0.0089	0.0821	2	4	FGL2,FCGR2B
GO: Biological Process	GO:1905041	regulation of epithelium regeneration				0.00171	1	0.0089	0.0821	2	4	SERPINE1,DUSP10
GO: Biological Process	GO:0035684	helper T cell extravasation				0.00171	1	0.0089	0.0821	2	4	CCL2,CCL5
GO: Biological Process	GO:0002774	Fc receptor mediated inhibitory signaling pathway				0.00171	1	0.0089	0.0821	2	4	LILRB4,LYN
GO: Biological Process	GO:0035697	CD8-positive, alpha-beta T cell extravasation				0.00171	1	0.0089	0.0821	2	4	CCR2,CCL5
GO: Biological Process	GO:0001969	regulation of activation of membrane attack complex				0.00171	1	0.0089	0.0821	2	4	C3,CR1
GO: Biological Process	GO:0002442	serotonin secretion involved in inflammatory response				0.00171	1	0.0089	0.0821	2	4	CD300A,FCER1G
GO: Biological Process	GO:1904466	positive regulation of matrix metallopeptidase secretion				0.00171	1	0.0089	0.0821	2	4	TLR2,TLR4
GO: Biological Process	GO:1900098	regulation of plasma cell differentiation				0.00171	1	0.0089	0.0821	2	4	IL10,CR1
GO: Biological Process	GO:1990399	epithelium regeneration				0.00171	1	0.0089	0.0821	2	4	SERPINE1,DUSP10
GO: Biological Process	GO:0006953	acute-phase response				0.00176	1	0.00913	0.0842	5	51	PTGS2,CD163,CCL5,IL1RN,IL6
GO: Biological Process	GO:2000117	negative regulation of cysteine-type endopeptidase activity				0.00176	1	0.00914	0.0843	7	101	PTGS2,PLAUR,MMP9,IGF1,CD44,LAMP3,IL6
GO: Biological Process	GO:0045598	regulation of fat cell differentiation				0.00179	1	0.00926	0.0854	9	160	PTGS2,CCN4,ALOX5,RUNX1T1,LEP,ZFPM2,IGF1,DUSP10,IL6
GO: Biological Process	GO:0009306	protein secretion				0.00179	1	0.00926	0.0854	17	444	MYO5A,TCIRG1,SCG2,CCL5,PLEK,ALOX5,COMP,ANXA1,APOE,LEP,ABCG1,IGF1,TLR2,TLR4,TREM2,IL1RN,IL6
GO: Biological Process	GO:0007167	enzyme linked receptor protein signaling pathway				0.0018	1	0.00929	0.0857	34	1168	CYBB,EREG,INHBA,RASSF2,ASPN,GATA6,TCIRG1,NCF2,NCF4,NRP2,PTPRE,TRAT1,LPXN,CCL2,FGF7,PLAUR,MMP2,FGR,MMP9,VAV1,COL1A1,COL1A2,SFRP4,COMP,LCP2,LEP,AREG,IGF1,LOX,GREM1,OSMR,LYN,HCK,NCKAP1L
GO: Biological Process	GO:0032374	regulation of cholesterol transport				0.0018	1	0.00929	0.0857	6	75	CES1,PLTP,APOC1,APOE,LEP,ABCG1
GO: Biological Process	GO:0032371	regulation of sterol transport				0.0018	1	0.00929	0.0857	6	75	CES1,PLTP,APOC1,APOE,LEP,ABCG1
GO: Biological Process	GO:0010876	lipid localization				0.00183	1	0.00942	0.0869	20	564	ATP8B4,INHBA,CES1,SLCO2B1,FABP4,GM2A,C3,PLTP,ANXA1,APOC1,APOE,SLC1A3,AQP9,LEP,MSR1,ABCG1,CD36,IL1RN,IL6,SOAT1
GO: Biological Process	GO:0035592	establishment of protein localization to extracellular region				0.00183	1	0.00944	0.0871	17	445	MYO5A,TCIRG1,SCG2,CCL5,PLEK,ALOX5,COMP,ANXA1,APOE,LEP,ABCG1,IGF1,TLR2,TLR4,TREM2,IL1RN,IL6
GO: Biological Process	GO:0001783	B cell apoptotic process				0.00184	1	0.00947	0.0874	4	31	IL10,BTK,CD44,LYN
GO: Biological Process	GO:0010818	T cell chemotaxis				0.00184	1	0.00947	0.0874	4	31	CCR2,PIK3CG,CCL5,GPR183
GO: Biological Process	GO:0071295	cellular response to vitamin				0.00184	1	0.00947	0.0874	4	31	COL1A1,FOLR2,LEP,POSTN
GO: Biological Process	GO:0051248	negative regulation of protein metabolic process				0.00191	1	0.00983	0.0906	35	1218	IL10,RASSF2,CD300A,SERPINF1,PTPN22,SAMSN1,PTGS2,FABP4,TWIST1,CD84,PTPRC,C3,PLAUR,MMP9,LILRB4,NIBAN1,RARRES1,APOE,CR1,LGALS3,IGF1,TIMP2,GZMB,SERPINE1,CD44,LAMP3,CSTA,IRAK3,DUSP10,GREM1,LYN,IL6,CTSZ,NCKAP1L,PHACTR1
GO: Biological Process	GO:0030225	macrophage differentiation				0.00192	1	0.00985	0.0908	5	52	INHBA,ITGAM,MMP9,TLR2,HCLS1
GO: Biological Process	GO:1905952	regulation of lipid localization				0.00192	1	0.00985	0.0908	11	227	CES1,C3,PLTP,APOC1,APOE,LEP,MSR1,ABCG1,CD36,IL1RN,IL6
GO: Biological Process	GO:0061430	bone trabecula morphogenesis				0.00194	1	0.00987	0.0911	3	15	MMP2,COL1A1,GREM1
GO: Biological Process	GO:0097531	mast cell migration				0.00194	1	0.00987	0.0911	3	15	CCL5,CCL11,RAC2
GO: Biological Process	GO:0070141	response to UV-A				0.00194	1	0.00987	0.0911	3	15	MMP1,MMP2,MMP9
GO: Biological Process	GO:0032736	positive regulation of interleukin-13 production				0.00194	1	0.00987	0.0911	3	15	IL33,NLRP3,TLR4
GO: Biological Process	GO:0043383	negative T cell selection				0.00194	1	0.00987	0.0911	3	15	PTPRC,DOCK2,CD28
GO: Biological Process	GO:0002638	negative regulation of immunoglobulin production				0.00194	1	0.00987	0.0911	3	15	FCGR2B,IL33,CR1
GO: Biological Process	GO:0002664	regulation of T cell tolerance induction				0.00194	1	0.00987	0.0911	3	15	CLC,LILRB4,CD86
GO: Biological Process	GO:0072683	T cell extravasation				0.00194	1	0.00987	0.0911	3	15	CCR2,CCL2,CCL5
GO: Biological Process	GO:0051547	regulation of keratinocyte migration				0.00194	1	0.00987	0.0911	3	15	FGF7,MMP9,SERPINE1
GO: Biological Process	GO:0030336	negative regulation of cell migration				0.00195	1	0.00989	0.0912	15	371	SLAMF8,CD300A,SERPINF1,HMOX1,MEOX2,ADORA3,CCL2,IL33,GPR18,APOE,MCTP1,SERPINE1,DUSP10,GREM1,IL1RN
GO: Biological Process	GO:0046545	development of primary female sexual characteristics				0.00199	1	0.0101	0.0933	8	132	EREG,INHBA,AHR,FGF7,MMP2,LEP,ZFPM2,SERPINE1
GO: Biological Process	GO:0001933	negative regulation of protein phosphorylation				0.002	1	0.0101	0.0934	16	410	RASSF2,CD300A,PTPN22,SAMSN1,FABP4,TWIST1,PTPRC,LILRB4,NIBAN1,APOE,IGF1,IRAK3,DUSP10,GREM1,LYN,IL6
GO: Biological Process	GO:0043032	positive regulation of macrophage activation				0.00208	1	0.0105	0.0971	4	32	IL10,IL33,TLR4,TREM2
GO: Biological Process	GO:0097306	cellular response to alcohol				0.00208	1	0.0105	0.0972	7	104	CYBB,INHBA,CES1,PTGDR,ADCY7,AHR,CCL7
GO: Biological Process	GO:0048010	vascular endothelial growth factor receptor signaling pathway				0.00208	1	0.0105	0.0972	7	104	CYBB,NCF2,NCF4,NRP2,CCL2,VAV1,NCKAP1L
GO: Biological Process	GO:0006629	lipid metabolic process				0.00209	1	0.0106	0.0973	41	1503	MYO5A,CES1,GATA6,ME1,PTGS2,FABP4,TWIST1,NOD2,ADORA2B,SMPDL3A,DPEP2,PIK3CG,KCNMA1,HRH1,GM2A,FGF7,C3,HSD11B1,FGR,PLEK,ST8SIA4,ALOX5,PLTP,ALOX5AP,GLIPR1,PLA2G7,ANXA1,AOAH,CH25H,APOC1,APOE,LEP,ABCG1,LIPA,IGF1,CD36,ST6GALNAC5,DHRS9,LYN,IL1RN,SOAT1
GO: Biological Process	GO:0031646	positive regulation of nervous system process				0.00209	1	0.0106	0.0973	5	53	PTAFR,ITGAX,IGF1,TNFRSF1B,IL6
GO: Biological Process	GO:0051222	positive regulation of protein transport				0.0021	1	0.0106	0.0979	15	374	PTPN22,ITGAM,ITGB2,PTGS2,CCL2,RAC2,LEP,ABCG1,IGF1,TLR2,GZMB,TLR4,TREM2,IL6,HCLS1
GO: Biological Process	GO:0044409	entry into host				0.00211	1	0.0107	0.0983	9	164	CLEC5A,TRIM22,FCN1,CCR5,MRC1,CR1,CD86,LAMP3,CXCL8
GO: Biological Process	GO:0071692	protein localization to extracellular region				0.00216	1	0.0109	0.1	17	452	MYO5A,TCIRG1,SCG2,CCL5,PLEK,ALOX5,COMP,ANXA1,APOE,LEP,ABCG1,IGF1,TLR2,TLR4,TREM2,IL1RN,IL6
GO: Biological Process	GO:0032412	regulation of ion transmembrane transporter activity				0.00217	1	0.0109	0.101	13	301	PDE4B,MYO5A,PTAFR,GEM,CCR2,KCNE4,CLIC2,CCL2,MMP9,PLN,ALOX5,TREM2,CTSS
GO: Biological Process	GO:0002260	lymphocyte homeostasis				0.0022	1	0.0111	0.102	6	78	TCIRG1,AHR,DOCK10,CD44,LYN,NCKAP1L
GO: Biological Process	GO:0043406	positive regulation of MAP kinase activity				0.00222	1	0.0111	0.103	12	266	ZEB2,NOD2,ADORA2B,S100A12,PTPRC,PIK3CG,C5AR1,MDFIC,FPR1,IGF1,TLR4,IL1RN
GO: Biological Process	GO:0051403	stress-activated MAPK cascade				0.00223	1	0.0112	0.103	13	302	RASSF2,CLEC7A,PTPN22,NOD2,ADORA2B,FCGR2B,MDFIC,SFRP4,MAP3K8,LEP,TLR4,DUSP10,GREM1
GO: Biological Process	GO:0060341	regulation of cellular localization				0.00224	1	0.0112	0.104	29	959	MYO5A,CD300A,PTPN22,HMOX1,ADGRE2,ITGAM,ITGB2,PTGS2,CD84,ADORA2B,TYROBP,FCER1G,CLIC2,CXCL9,CCL2,FGR,PLN,RAC2,LILRB4,MDFIC,LCP1,LEP,LGALS3,CD36,GZMB,TREM2,LYN,IL6,HCLS1
GO: Biological Process	GO:0042307	positive regulation of protein import into nucleus				0.00227	1	0.0114	0.105	5	54	PTPN22,PTGS2,LEP,IL6,HCLS1
GO: Biological Process	GO:0030195	negative regulation of blood coagulation				0.00227	1	0.0114	0.105	5	54	FAP,PLAUR,APOE,THBD,SERPINE1
GO: Biological Process	GO:0042339	keratan sulfate metabolic process				0.00233	1	0.0117	0.107	4	33	KERA,OMD,OGN,LUM
GO: Biological Process	GO:0045932	negative regulation of muscle contraction				0.00233	1	0.0117	0.107	4	33	PTGS2,ADORA2B,PIK3CG,KCNMA1
GO: Biological Process	GO:0045672	positive regulation of osteoclast differentiation				0.00233	1	0.0117	0.107	4	33	TYROBP,CCR1,CCL5,TREM2
GO: Biological Process	GO:0061138	morphogenesis of a branching epithelium				0.00235	1	0.0117	0.108	11	233	IL10,AHR,FGF7,CCL11,AREG,IGF1,CD44,GREM1,CTSD,IL6,CTSZ
GO: Biological Process	GO:0045444	fat cell differentiation				0.00236	1	0.0117	0.108	12	268	PTGS2,PLAC8,FABP4,CCN4,ALOX5,NR4A2,RUNX1T1,LEP,ZFPM2,IGF1,DUSP10,IL6
GO: Biological Process	GO:0010838	positive regulation of keratinocyte proliferation				0.00236	1	0.0117	0.108	3	16	FGF7,AREG,TLR4
GO: Biological Process	GO:0035630	bone mineralization involved in bone maturation				0.00236	1	0.0117	0.108	3	16	LEP,IGF1,GREM1
GO: Biological Process	GO:0019372	lipoxygenase pathway				0.00236	1	0.0117	0.108	3	16	PTGS2,ALOX5,ALOX5AP
GO: Biological Process	GO:0051101	regulation of DNA binding				0.0024	1	0.0119	0.11	8	136	HMOX1,TWIST1,PLAUR,MMP9,RUNX1T1,IGF1,GZMA,TLR4
GO: Biological Process	GO:0035821	modulation of process of other organism				0.0024	1	0.0119	0.11	8	136	CLEC7A,S100A9,CCL4,CCL5,CCL8,MMP9,CXCL6,APOE
GO: Biological Process	GO:0002790	peptide secretion				0.00243	1	0.012	0.111	18	497	MYO5A,TCIRG1,S100A8,SCG2,CCL5,PLEK,ALOX5,COMP,ANXA1,APOE,LEP,ABCG1,IGF1,TLR2,TLR4,TREM2,IL1RN,IL6
GO: Biological Process	GO:0030324	lung development				0.00243	1	0.0121	0.111	11	234	GATA6,CHI3L1,FGF7,HSD11B1,MMP12,ZFPM2,LIPA,IGF1,LOX,CTSD,CTSZ
GO: Biological Process	GO:0070167	regulation of biomineral tissue development				0.00245	1	0.0121	0.112	7	107	ASPN,TWIST1,CCR1,ALOX5,COMP,OMD,GREM1
GO: Biological Process	GO:1904063	negative regulation of cation transmembrane transport				0.00245	1	0.0121	0.112	7	107	GEM,TWIST1,KCNE4,CLIC2,AHR,MMP9,PLN
GO: Biological Process	GO:0072523	purine-containing compound catabolic process				0.00246	1	0.0122	0.112	5	55	PDE4B,ADA2,DPYD,NT5E,SAMHD1
GO: Biological Process	GO:0044273	sulfur compound catabolic process				0.00246	1	0.0122	0.112	5	55	KERA,OMD,OGN,VCAN,LUM
GO: Biological Process	GO:0043547	positive regulation of GTPase activity				0.00248	1	0.0122	0.113	16	419	RASGRP3,CCL2,CCL4,CCL5,CCL7,CCL8,CCL11,CCL18,CCL20,VAV1,DOCK2,GPR65,DOCK10,RGS1,ADAP2,NCKAP1L
GO: Biological Process	GO:0007492	endoderm development				0.00252	1	0.0124	0.114	11	235	IL10,INHBA,GATA6,ITGA4,ITGB2,MMP2,MMP9,COL5A1,COL8A1,COL11A1,IL1RN
GO: Biological Process	GO:1901215	negative regulation of neuron death				0.00258	1	0.0127	0.117	12	271	IL10,SERPINF1,HMOX1,CCL2,CCL5,C5AR1,GPNMB,NR4A2,APOE,IGF1,TNFRSF1B,IL6
GO: Biological Process	GO:0038095	Fc-epsilon receptor signaling pathway				0.00259	1	0.0127	0.118	9	169	ITK,FCER1G,BTK,VAV1,LAT2,LCP2,IGKC,IGLC1,LYN
GO: Biological Process	GO:0097435	supramolecular fiber organization				0.0026	1	0.0128	0.118	25	793	MYO5A,CYRIA,PDLIM3,COL14A1,CCL11,PLEK,RAC2,COL1A1,COL1A2,COL5A1,COL11A1,GPR65,COMP,APOE,LCP1,MFAP5,LOX,CD36,TLR2,GREM1,LUM,HCK,HCLS1,NCKAP1L,PHACTR1
GO: Biological Process	GO:0032373	positive regulation of sterol transport				0.00261	1	0.0128	0.118	4	34	CES1,PLTP,APOE,ABCG1
GO: Biological Process	GO:0032376	positive regulation of cholesterol transport				0.00261	1	0.0128	0.118	4	34	CES1,PLTP,APOE,ABCG1
GO: Biological Process	GO:2001233	regulation of apoptotic signaling pathway				0.00266	1	0.013	0.12	16	422	INHBA,HMOX1,PTGS2,S100A8,S100A9,PTPRC,VNN1,SCG2,PLAUR,SRPX,MMP9,NR4A2,LGALS3,IGF1,SERPINE1,CD44
GO: Biological Process	GO:0045453	bone resorption				0.00266	1	0.013	0.12	6	81	ACP5,TCIRG1,DCSTAMP,RAC2,CTSS,IL6
GO: Biological Process	GO:0014065	phosphatidylinositol 3-kinase signaling				0.0027	1	0.0132	0.122	9	170	TWIST1,PIK3CG,CCL5,FGR,LEP,IGF1,CD28,LYN,HCLS1
GO: Biological Process	GO:0110149	regulation of biomineralization				0.00272	1	0.0133	0.123	7	109	ASPN,TWIST1,CCR1,ALOX5,COMP,OMD,GREM1
GO: Biological Process	GO:0030323	respiratory tube development				0.00277	1	0.0135	0.125	11	238	GATA6,CHI3L1,FGF7,HSD11B1,MMP12,ZFPM2,LIPA,IGF1,LOX,CTSD,CTSZ
GO: Biological Process	GO:0046890	regulation of lipid biosynthetic process				0.00277	1	0.0135	0.125	11	238	CES1,PTGS2,ADORA2B,HRH1,C3,ANXA1,APOC1,APOE,LEP,ABCG1,IGF1
GO: Biological Process	GO:0090316	positive regulation of intracellular protein transport				0.0028	1	0.0136	0.125	10	204	PTPN22,ITGAM,ITGB2,PTGS2,CCL2,RAC2,LEP,GZMB,IL6,HCLS1
GO: Biological Process	GO:0060266	negative regulation of respiratory burst involved in inflammatory response				0.00282	1	0.0136	0.125	2	5	SLAMF8,DUSP10
GO: Biological Process	GO:0030451	regulation of complement activation, alternative pathway				0.00282	1	0.0136	0.125	2	5	VSIG4,CR1
GO: Biological Process	GO:0110088	hippocampal neuron apoptotic process				0.00282	1	0.0136	0.125	2	5	ITGAM,TYROBP
GO: Biological Process	GO:0110089	regulation of hippocampal neuron apoptotic process				0.00282	1	0.0136	0.125	2	5	ITGAM,TYROBP
GO: Biological Process	GO:0014005	microglia development				0.00282	1	0.0136	0.125	2	5	ITGAM,TLR2
GO: Biological Process	GO:0032763	regulation of mast cell cytokine production				0.00282	1	0.0136	0.125	2	5	HMOX1,FCER1G
GO: Biological Process	GO:0043378	positive regulation of CD8-positive, alpha-beta T cell differentiation				0.00282	1	0.0136	0.125	2	5	LILRB4,NCKAP1L
GO: Biological Process	GO:0045963	negative regulation of dopamine metabolic process				0.00282	1	0.0136	0.125	2	5	ITGAM,ITGB2
GO: Biological Process	GO:0038156	interleukin-3-mediated signaling pathway				0.00282	1	0.0136	0.125	2	5	FCER1G,CSF2RB
GO: Biological Process	GO:0097350	neutrophil clearance				0.00282	1	0.0136	0.125	2	5	CCR2,ANXA1
GO: Biological Process	GO:0033031	positive regulation of neutrophil apoptotic process				0.00282	1	0.0136	0.125	2	5	ANXA1,CD44
GO: Biological Process	GO:0042494	detection of bacterial lipoprotein				0.00282	1	0.0136	0.125	2	5	TLR1,TLR2
GO: Biological Process	GO:1903972	regulation of cellular response to macrophage colony-stimulating factor stimulus				0.00282	1	0.0136	0.125	2	5	TLR2,TLR4
GO: Biological Process	GO:1903969	regulation of response to macrophage colony-stimulating factor				0.00282	1	0.0136	0.125	2	5	TLR2,TLR4
GO: Biological Process	GO:1901617	organic hydroxy compound biosynthetic process				0.00282	1	0.0136	0.125	12	274	MYO5A,CES1,PTAFR,ZEB2,HRH1,PLEK,PLTP,CH25H,NR4A2,APOE,LEP,ABCG1
GO: Biological Process	GO:0150078	positive regulation of neuroinflammatory response				0.00283	1	0.0136	0.125	3	17	IL33,TREM2,IL6
GO: Biological Process	GO:0001820	serotonin secretion				0.00283	1	0.0136	0.125	3	17	CD300A,FCER1G,LGALS3
GO: Biological Process	GO:0070431	nucleotide-binding oligomerization domain containing 2 signaling pathway				0.00283	1	0.0136	0.125	3	17	PTPN22,NOD2,TLR4
GO: Biological Process	GO:0002517	T cell tolerance induction				0.00283	1	0.0136	0.125	3	17	CLC,LILRB4,CD86
GO: Biological Process	GO:0014015	positive regulation of gliogenesis				0.00283	1	0.0136	0.125	6	82	IL33,IGF1,TLR2,TNFRSF1B,LYN,IL6
GO: Biological Process	GO:0050819	negative regulation of coagulation				0.00289	1	0.0138	0.127	5	57	FAP,PLAUR,APOE,THBD,SERPINE1
GO: Biological Process	GO:0051930	regulation of sensory perception of pain				0.00289	1	0.0138	0.127	5	57	IL10,PTAFR,IL33,TLR4,CTSS
GO: Biological Process	GO:0032872	regulation of stress-activated MAPK cascade				0.0029	1	0.0139	0.128	10	205	RASSF2,CLEC7A,PTPN22,NOD2,FCGR2B,SFRP4,LEP,TLR4,DUSP10,GREM1
GO: Biological Process	GO:0090050	positive regulation of cell migration involved in sprouting angiogenesis				0.00291	1	0.0139	0.128	4	35	HMOX1,PTGS2,SRPX2,ANXA1
GO: Biological Process	GO:0002756	MyD88-independent toll-like receptor signaling pathway				0.00291	1	0.0139	0.128	4	35	LY96,BIRC3,CD14,TLR4
GO: Biological Process	GO:2000146	negative regulation of cell motility				0.00291	1	0.0139	0.128	15	387	SLAMF8,CD300A,SERPINF1,HMOX1,MEOX2,ADORA3,CCL2,IL33,GPR18,APOE,MCTP1,SERPINE1,DUSP10,GREM1,IL1RN
GO: Biological Process	GO:0042326	negative regulation of phosphorylation				0.00301	1	0.0144	0.132	17	467	INHBA,RASSF2,CD300A,PTPN22,SAMSN1,FABP4,TWIST1,PTPRC,LILRB4,NIBAN1,APOE,IGF1,IRAK3,DUSP10,GREM1,LYN,IL6
GO: Biological Process	GO:0010675	regulation of cellular carbohydrate metabolic process				0.00303	1	0.0144	0.133	9	173	PTAFR,ADORA2B,HRH1,HSD11B1,PLEK,LEP,IGF1,CD36,IL6
GO: Biological Process	GO:0050873	brown fat cell differentiation				0.00311	1	0.0148	0.137	5	58	PTGS2,PLAC8,FABP4,LEP,DUSP10
GO: Biological Process	GO:0051931	regulation of sensory perception				0.00311	1	0.0148	0.137	5	58	IL10,PTAFR,IL33,TLR4,CTSS
GO: Biological Process	GO:1904951	positive regulation of establishment of protein localization				0.00313	1	0.0149	0.137	15	390	PTPN22,ITGAM,ITGB2,PTGS2,CCL2,RAC2,LEP,ABCG1,IGF1,TLR2,GZMB,TLR4,TREM2,IL6,HCLS1
GO: Biological Process	GO:0010595	positive regulation of endothelial cell migration				0.00314	1	0.0149	0.137	8	142	HMOX1,PTGS2,NRP2,ADORA2B,SRPX2,PIK3CG,ANXA1,IGF1
GO: Biological Process	GO:0061045	negative regulation of wound healing				0.0032	1	0.0151	0.14	6	84	FAP,PLAUR,ALOX5,APOE,THBD,SERPINE1
GO: Biological Process	GO:0031100	animal organ regeneration				0.0032	1	0.0151	0.14	6	84	IL10,HMOX1,C5AR1,NNMT,LCP1,IL6
GO: Biological Process	GO:0001773	myeloid dendritic cell activation				0.00323	1	0.0153	0.141	4	36	IL10,DCSTAMP,DOCK2,CD2
GO: Biological Process	GO:2000406	positive regulation of T cell migration				0.00323	1	0.0153	0.141	4	36	ITGA4,CCR2,CCL5,CCL20
GO: Biological Process	GO:0010594	regulation of endothelial cell migration				0.00325	1	0.0154	0.142	11	243	SERPINF1,HMOX1,PTGS2,NRP2,MEOX2,ADORA2B,SRPX2,PIK3CG,ANXA1,APOE,IGF1
GO: Biological Process	GO:0050810	regulation of steroid biosynthetic process				0.00333	1	0.0157	0.145	7	113	CES1,ADORA2B,HRH1,APOE,LEP,ABCG1,IGF1
GO: Biological Process	GO:0006869	lipid transport				0.00333	1	0.0157	0.145	18	512	ATP8B4,INHBA,CES1,SLCO2B1,FABP4,GM2A,PLTP,ANXA1,APOC1,APOE,SLC1A3,AQP9,LEP,MSR1,ABCG1,CD36,IL1RN,SOAT1
GO: Biological Process	GO:0048015	phosphatidylinositol-mediated signaling				0.00333	1	0.0157	0.145	10	209	PTAFR,TWIST1,PIK3CG,CCL5,FGR,LEP,IGF1,CD28,LYN,HCLS1
GO: Biological Process	GO:0016045	detection of bacterium				0.00335	1	0.0157	0.145	3	18	NOD2,TLR1,TLR2
GO: Biological Process	GO:0150079	negative regulation of neuroinflammatory response				0.00335	1	0.0157	0.145	3	18	PTPRC,IGF1,TNFRSF1B
GO: Biological Process	GO:0043374	CD8-positive, alpha-beta T cell differentiation				0.00335	1	0.0157	0.145	3	18	LILRB4,GPR18,NCKAP1L
GO: Biological Process	GO:0070269	pyroptosis				0.00335	1	0.0157	0.145	3	18	CASP1,GZMA,GZMB
GO: Biological Process	GO:0071361	cellular response to ethanol				0.00335	1	0.0157	0.145	3	18	CYBB,ADCY7,CCL7
GO: Biological Process	GO:0034374	low-density lipoprotein particle remodeling				0.00335	1	0.0157	0.145	3	18	PLA2G7,APOE,ABCG1
GO: Biological Process	GO:0046007	negative regulation of activated T cell proliferation				0.00335	1	0.0157	0.145	3	18	LAPTM5,LILRB4,CRTAM
GO: Biological Process	GO:0001913	T cell mediated cytotoxicity				0.00336	1	0.0157	0.145	5	59	PTPRC,FCGR2B,GZMB,CRTAM,IL7R
GO: Biological Process	GO:1904591	positive regulation of protein import				0.00336	1	0.0157	0.145	5	59	PTPN22,PTGS2,LEP,IL6,HCLS1
GO: Biological Process	GO:0140448	signaling receptor ligand precursor processing				0.00357	1	0.0167	0.154	4	37	CES1,CASP1,CPA3,CTSZ
GO: Biological Process	GO:0051482	positive regulation of cytosolic calcium ion concentration involved in phospholipase C-activating G protein-coupled signaling pathway				0.00357	1	0.0167	0.154	4	37	C3AR1,GNA15,GPR18,GPR65
GO: Biological Process	GO:0051047	positive regulation of secretion				0.0036	1	0.0168	0.155	15	396	INHBA,PTAFR,ITGAM,ITGB2,S100A8,ADORA2B,FCER1G,FGR,LEP,LGALS3,ABCG1,IGF1,TLR2,TLR4,TREM2
GO: Biological Process	GO:0032648	regulation of interferon-beta production				0.00361	1	0.0168	0.155	5	60	PTPN22,TLR7,IFIH1,TLR2,TLR4
GO: Biological Process	GO:0046425	regulation of receptor signaling pathway via JAK-STAT				0.00367	1	0.0171	0.158	7	115	IL10,IL10RA,CD300A,PTPRC,CCL5,LEP,IL6
GO: Biological Process	GO:1902882	regulation of response to oxidative stress				0.00367	1	0.0171	0.158	7	115	IL10,ITGAM,VNN1,ALOX5,MCTP1,CD36,TLR4
GO: Biological Process	GO:0042476	odontogenesis				0.00371	1	0.0173	0.159	8	146	MYO5A,INHBA,ASPN,TCIRG1,TWIST1,COL1A1,COL1A2,SERPINE1
GO: Biological Process	GO:0051271	negative regulation of cellular component movement				0.00377	1	0.0175	0.162	15	398	SLAMF8,CD300A,SERPINF1,HMOX1,MEOX2,ADORA3,CCL2,IL33,GPR18,APOE,MCTP1,SERPINE1,DUSP10,GREM1,IL1RN
GO: Biological Process	GO:0032880	regulation of protein localization				0.00378	1	0.0175	0.162	30	1040	MYO5A,TCIRG1,PTPN22,ITGAM,ITGB2,TRIM22,PTGS2,TYROBP,FCER1G,CCL2,CCL5,ALOX5,RAC2,LILRB4,MDFIC,ANXA1,APOE,LCP1,LEP,LGALS3,ABCG1,IGF1,CD36,TLR2,GZMB,TLR4,TREM2,CTSD,IL6,HCLS1
GO: Biological Process	GO:0043407	negative regulation of MAP kinase activity				0.0038	1	0.0176	0.163	6	87	CD300A,PTPN22,APOE,IRAK3,DUSP10,LYN
GO: Biological Process	GO:0030500	regulation of bone mineralization				0.0038	1	0.0176	0.163	6	87	TWIST1,CCR1,ALOX5,COMP,OMD,GREM1
GO: Biological Process	GO:0043255	regulation of carbohydrate biosynthetic process				0.00385	1	0.0178	0.164	7	116	PTAFR,HRH1,PLEK,LEP,IGF1,CD36,IL6
GO: Biological Process	GO:0046660	female sex differentiation				0.00387	1	0.0179	0.165	8	147	EREG,INHBA,AHR,FGF7,MMP2,LEP,ZFPM2,SERPINE1
GO: Biological Process	GO:0046683	response to organophosphorus				0.00387	1	0.0179	0.165	8	147	PTAFR,PIK3CG,AHR,COL1A1,SELL,CASP1,AQP9,THBD
GO: Biological Process	GO:1904036	negative regulation of epithelial cell apoptotic process				0.00388	1	0.0179	0.165	5	61	IL10,HMOX1,SCG2,IGF1,SERPINE1
GO: Biological Process	GO:0045346	regulation of MHC class II biosynthetic process				0.00393	1	0.0181	0.167	3	19	IL10,IL33,TLR4
GO: Biological Process	GO:0044546	NLRP3 inflammasome complex assembly				0.00393	1	0.0181	0.167	3	19	NLRP3,CD36,TLR4
GO: Biological Process	GO:0010919	regulation of inositol phosphate biosynthetic process				0.00393	1	0.0181	0.167	3	19	PTAFR,HRH1,PLEK
GO: Biological Process	GO:0045591	positive regulation of regulatory T cell differentiation				0.00393	1	0.0181	0.167	3	19	LILRB4,CR1,DUSP10
GO: Biological Process	GO:0001659	temperature homeostasis				0.00394	1	0.0181	0.167	9	180	PTGS2,PLAC8,FABP4,CCR2,CCL5,LEP,CD36,TLR4,IL1RN
GO: Biological Process	GO:1903532	positive regulation of secretion by cell				0.00414	1	0.0189	0.175	14	363	INHBA,PTAFR,ITGAM,ITGB2,ADORA2B,FCER1G,FGR,LEP,LGALS3,ABCG1,IGF1,TLR2,TLR4,TREM2
GO: Biological Process	GO:0032608	interferon-beta production				0.00416	1	0.0189	0.175	5	62	PTPN22,TLR7,IFIH1,TLR2,TLR4
GO: Biological Process	GO:1902564	negative regulation of neutrophil activation				0.00419	1	0.0189	0.175	2	6	CD300A,FCGR2B
GO: Biological Process	GO:2000110	negative regulation of macrophage apoptotic process				0.00419	1	0.0189	0.175	2	6	NOD2,CCL5
GO: Biological Process	GO:0061470	T follicular helper cell differentiation				0.00419	1	0.0189	0.175	2	6	GPR183,IL6
GO: Biological Process	GO:0060264	regulation of respiratory burst involved in inflammatory response				0.00419	1	0.0189	0.175	2	6	SLAMF8,DUSP10
GO: Biological Process	GO:0010757	negative regulation of plasminogen activation				0.00419	1	0.0189	0.175	2	6	SERPINE1,CTSZ
GO: Biological Process	GO:0090027	negative regulation of monocyte chemotaxis				0.00419	1	0.0189	0.175	2	6	SLAMF8,GREM1
GO: Biological Process	GO:1903613	regulation of protein tyrosine phosphatase activity				0.00419	1	0.0189	0.175	2	6	PTPRC,LGALS3
GO: Biological Process	GO:0070945	neutrophil-mediated killing of gram-negative bacterium				0.00419	1	0.0189	0.175	2	6	CXCL6,TREM1
GO: Biological Process	GO:0045112	integrin biosynthetic process				0.00419	1	0.0189	0.175	2	6	S100A9,COL5A1
GO: Biological Process	GO:0002925	positive regulation of humoral immune response mediated by circulating immunoglobulin				0.00419	1	0.0189	0.175	2	6	NOD2,PTPRC
GO: Biological Process	GO:0010572	positive regulation of platelet activation				0.00419	1	0.0189	0.175	2	6	PLEK,TLR4
GO: Biological Process	GO:0036072	direct ossification				0.00419	1	0.0189	0.175	2	6	MMP2,COL1A1
GO: Biological Process	GO:1902031	regulation of NADP metabolic process				0.00419	1	0.0189	0.175	2	6	ME1,HSD11B1
GO: Biological Process	GO:0045914	negative regulation of catecholamine metabolic process				0.00419	1	0.0189	0.175	2	6	ITGAM,ITGB2
GO: Biological Process	GO:2001268	negative regulation of cysteine-type endopeptidase activity involved in apoptotic signaling pathway				0.00419	1	0.0189	0.175	2	6	PLAUR,MMP9
GO: Biological Process	GO:0001957	intramembranous ossification				0.00419	1	0.0189	0.175	2	6	MMP2,COL1A1
GO: Biological Process	GO:1990379	lipid transport across blood-brain barrier				0.00419	1	0.0189	0.175	2	6	APOE,CD36
GO: Biological Process	GO:0006032	chitin catabolic process				0.00419	1	0.0189	0.175	2	6	CHI3L1,CHIT1
GO: Biological Process	GO:0006030	chitin metabolic process				0.00419	1	0.0189	0.175	2	6	CHI3L1,CHIT1
GO: Biological Process	GO:0034136	negative regulation of toll-like receptor 2 signaling pathway				0.00419	1	0.0189	0.175	2	6	NOD2,LYN
GO: Biological Process	GO:0009408	response to heat				0.00423	1	0.0191	0.176	9	182	PDE4B,HMOX1,MICB,CCL2,HSPA6,TFEC,IGF1,CD14,LYN
GO: Biological Process	GO:0001763	morphogenesis of a branching structure				0.00427	1	0.0193	0.178	11	252	IL10,AHR,FGF7,CCL11,AREG,IGF1,CD44,GREM1,CTSD,IL6,CTSZ
GO: Biological Process	GO:0003012	muscle system process				0.00431	1	0.0195	0.18	18	525	PDE4B,GATA6,ACTG2,HMOX1,PTAFR,PTGS2,ADORA2B,CCN4,KCNE4,CLIC2,PIK3CG,KCNMA1,COL14A1,PLN,COMP,LEP,IGF1,TNFRSF1B
GO: Biological Process	GO:0010742	macrophage derived foam cell differentiation				0.00433	1	0.0195	0.18	4	39	MSR1,ABCG1,CD36,SOAT1
GO: Biological Process	GO:0061919	process utilizing autophagic mechanism				0.00435	1	0.0196	0.181	19	567	IL10,IL10RA,TCIRG1,PTPN22,HMOX1,TRIM22,LAPTM5,NOD2,CD84,S100A8,S100A9,SRPX,CASP1,IRF8,LEP,TLR2,TREM2,LAMP3,CTSD
GO: Biological Process	GO:0006914	autophagy				0.00435	1	0.0196	0.181	19	567	IL10,IL10RA,TCIRG1,PTPN22,HMOX1,TRIM22,LAPTM5,NOD2,CD84,S100A8,S100A9,SRPX,CASP1,IRF8,LEP,TLR2,TREM2,LAMP3,CTSD
GO: Biological Process	GO:0043200	response to amino acid				0.00442	1	0.0199	0.184	7	119	CYBB,MMP2,COL1A1,COL1A2,COL16A1,SLC1A3,LYN
GO: Biological Process	GO:0043436	oxoacid metabolic process				0.00445	1	0.02	0.185	31	1098	NPL,MYO5A,CES1,ME1,PTGS2,FABP4,TWIST1,VNN1,DPEP2,C3,GFPT2,ALOX5,ALOX5AP,SDS,DPYD,ANXA1,FOLR2,AOAH,CH25H,APOC1,TDO2,PAPSS2,SLC1A3,LEP,SLC2A3,LIPA,IGF1,CD36,TLR2,DHRS9,TLR4
GO: Biological Process	GO:0010507	negative regulation of autophagy				0.0045	1	0.0202	0.186	6	90	IL10,IL10RA,PTPN22,HMOX1,LEP,TREM2
GO: Biological Process	GO:0097191	extrinsic apoptotic signaling pathway				0.00453	1	0.0203	0.188	11	254	INHBA,BCL2A1,HMOX1,PTPRC,SCG2,SRPX,IL33,LGALS3,IGF1,SERPINE1,TNFRSF1B
GO: Biological Process	GO:0034250	positive regulation of cellular amide metabolic process				0.00454	1	0.0203	0.188	9	184	PTAFR,NOD2,PRR16,CCL5,NIBAN1,APOE,ABCG1,CD28,IL6
GO: Biological Process	GO:0046718	viral entry into host cell				0.00455	1	0.0203	0.188	8	151	CLEC5A,TRIM22,FCN1,CCR5,MRC1,CR1,CD86,LAMP3
GO: Biological Process	GO:0034766	negative regulation of ion transmembrane transport				0.00455	1	0.0203	0.188	8	151	GEM,TWIST1,KCNE4,CLIC2,AHR,MMP9,PLN,LEP
GO: Biological Process	GO:0002281	macrophage activation involved in immune response				0.00457	1	0.0203	0.188	3	20	TYROBP,IL33,TREM2
GO: Biological Process	GO:0045342	MHC class II biosynthetic process				0.00457	1	0.0203	0.188	3	20	IL10,IL33,TLR4
GO: Biological Process	GO:0002862	negative regulation of inflammatory response to antigenic stimulus				0.00457	1	0.0203	0.188	3	20	IL10,NOD2,FCGR2B
GO: Biological Process	GO:2000341	regulation of chemokine (C-X-C motif) ligand 2 production				0.00457	1	0.0203	0.188	3	20	CCL5,POSTN,TLR4
GO: Biological Process	GO:0072567	chemokine (C-X-C motif) ligand 2 production				0.00457	1	0.0203	0.188	3	20	CCL5,POSTN,TLR4
GO: Biological Process	GO:0045579	positive regulation of B cell differentiation				0.00457	1	0.0203	0.188	3	20	IL10,BTK,NCKAP1L
GO: Biological Process	GO:0051546	keratinocyte migration				0.00457	1	0.0203	0.188	3	20	FGF7,MMP9,SERPINE1
GO: Biological Process	GO:0002220	innate immune response activating cell surface receptor signaling pathway				0.00463	1	0.0206	0.19	7	120	TYROBP,FCER1G,CLEC4A,FCN1,CLEC10A,TLR2,LYN
GO: Biological Process	GO:0019058	viral life cycle				0.00466	1	0.0207	0.191	14	368	CLEC5A,TRIM22,FCN1,CCL2,CCL5,CCR5,CCL8,MRC1,APOE,CR1,CD28,CD86,LAMP3,CXCL8
GO: Biological Process	GO:0046777	protein autophosphorylation				0.00467	1	0.0207	0.191	11	255	RASSF2,STK17B,ITK,PTPRC,BTK,GPNMB,FGR,IRAK3,GREM1,LYN,HCK
GO: Biological Process	GO:1901615	organic hydroxy compound metabolic process				0.00467	1	0.0207	0.191	20	613	MYO5A,CES1,PTAFR,ITGAM,ITGB2,ZEB2,KCNMA1,HRH1,PLEK,PLTP,CH25H,NR4A2,APOC1,APOE,LEP,ABCG1,LIPA,IGF1,DHRS9,SOAT1
GO: Biological Process	GO:0043534	blood vessel endothelial cell migration				0.00471	1	0.0209	0.193	9	185	HMOX1,PTGS2,MEOX2,SRPX2,ANXA1,APOE,IGF1,EGR3,GREM1
GO: Biological Process	GO:0034763	negative regulation of transmembrane transport				0.00473	1	0.021	0.193	8	152	GEM,TWIST1,KCNE4,CLIC2,AHR,MMP9,PLN,LEP
GO: Biological Process	GO:0044344	cellular response to fibroblast growth factor stimulus				0.00473	1	0.021	0.193	8	152	CCL2,FGF7,CCL5,COL1A1,POSTN,EGR3,CD44,CXCL8
GO: Biological Process	GO:0090077	foam cell differentiation				0.00475	1	0.021	0.193	4	40	MSR1,ABCG1,CD36,SOAT1
GO: Biological Process	GO:0090505	epiboly involved in wound healing				0.00475	1	0.021	0.193	4	40	MMP12,COL5A1,LCP1,CD44
GO: Biological Process	GO:0044319	wound healing, spreading of cells				0.00475	1	0.021	0.193	4	40	MMP12,COL5A1,LCP1,CD44
GO: Biological Process	GO:0060249	anatomical structure homeostasis				0.00475	1	0.021	0.193	18	530	ACP5,TCIRG1,DCSTAMP,PTGS2,NOD2,CCR2,SASH3,FGF7,COL14A1,RAC2,LIPA,LOX,JCHAIN,IGKC,TLR4,LYZ,CTSS,IL6
GO: Biological Process	GO:0048608	reproductive structure development				0.00475	1	0.021	0.193	18	530	IL10,EREG,INHBA,SERPINF1,GATA6,ITGA4,PTGS2,AHR,FGF7,C3,PLAUR,MMP2,ANXA1,LEP,ZFPM2,IGF1,SERPINE1,CD44
GO: Biological Process	GO:0048260	positive regulation of receptor-mediated endocytosis				0.00477	1	0.021	0.194	5	64	C3,SELE,SFRP4,SERPINE1,GREM1
GO: Biological Process	GO:0043388	positive regulation of DNA binding				0.00477	1	0.021	0.194	5	64	TWIST1,PLAUR,MMP9,IGF1,TLR4
GO: Biological Process	GO:0010038	response to metal ion				0.00484	1	0.0213	0.197	15	409	CYBB,CYBRD1,SERPINF1,TCIRG1,HMOX1,ADCY7,FABP4,S100A8,KCNMA1,C1QA,MMP9,PLN,ALOX5AP,AQP9,CD14
GO: Biological Process	GO:0051341	regulation of oxidoreductase activity				0.00485	1	0.0213	0.197	7	121	SLAMF8,NOD2,ALOX5,APOE,LEP,GZMA,AOC3
GO: Biological Process	GO:0008202	steroid metabolic process				0.005	1	0.022	0.203	14	371	CES1,ADORA2B,KCNMA1,HRH1,HSD11B1,CH25H,APOC1,APOE,LEP,ABCG1,LIPA,IGF1,DHRS9,SOAT1
GO: Biological Process	GO:0051145	smooth muscle cell differentiation				0.005	1	0.022	0.203	6	92	CFH,EREG,GATA6,CFD,C3,COMP
GO: Biological Process	GO:0052126	movement in host environment				0.00505	1	0.0221	0.204	9	187	CLEC5A,TRIM22,FCN1,CCR5,MRC1,CR1,CD86,LAMP3,CXCL8
GO: Biological Process	GO:0150063	visual system development				0.00515	1	0.0226	0.208	16	452	CFH,INHBA,SERPINF1,TCIRG1,ITGAM,ZEB2,TWIST1,CFD,AHR,C1QA,C3,COL5A1,COL8A1,COL8A2,KERA,MFAP5
GO: Biological Process	GO:0070423	nucleotide-binding oligomerization domain containing signaling pathway				0.00519	1	0.0227	0.209	4	41	PTPN22,NOD2,BIRC3,TLR4
GO: Biological Process	GO:0045742	positive regulation of epidermal growth factor receptor signaling pathway				0.00519	1	0.0227	0.209	4	41	EREG,PLAUR,MMP9,AREG
GO: Biological Process	GO:0048873	homeostasis of number of cells within a tissue				0.00519	1	0.0227	0.209	4	41	CCR2,SASH3,COL14A1,LIPA
GO: Biological Process	GO:0090504	epiboly				0.00519	1	0.0227	0.209	4	41	MMP12,COL5A1,LCP1,CD44
GO: Biological Process	GO:0019752	carboxylic acid metabolic process				0.00521	1	0.0227	0.21	30	1064	NPL,MYO5A,CES1,ME1,PTGS2,FABP4,TWIST1,VNN1,DPEP2,C3,GFPT2,ALOX5,ALOX5AP,SDS,DPYD,ANXA1,FOLR2,AOAH,CH25H,APOC1,TDO2,SLC1A3,LEP,SLC2A3,LIPA,IGF1,CD36,TLR2,DHRS9,TLR4
GO: Biological Process	GO:0061458	reproductive system development				0.00522	1	0.0228	0.21	18	535	IL10,EREG,INHBA,SERPINF1,GATA6,ITGA4,PTGS2,AHR,FGF7,C3,PLAUR,MMP2,ANXA1,LEP,ZFPM2,IGF1,SERPINE1,CD44
GO: Biological Process	GO:0008037	cell recognition				0.00523	1	0.0228	0.21	11	259	CLEC7A,FCN1,DOCK2,FOLR2,LGALS3,CD36,VCAN,IGKC,CRTAM,IGLC1,TRBC1
GO: Biological Process	GO:0031649	heat generation				0.00526	1	0.0228	0.21	3	21	PTGS2,CCL5,IL1RN
GO: Biological Process	GO:0060192	negative regulation of lipase activity				0.00526	1	0.0228	0.21	3	21	PLEK,ANXA1,APOC1
GO: Biological Process	GO:0043691	reverse cholesterol transport				0.00526	1	0.0228	0.21	3	21	CES1,APOE,ABCG1
GO: Biological Process	GO:0045986	negative regulation of smooth muscle contraction				0.00526	1	0.0228	0.21	3	21	PTGS2,ADORA2B,KCNMA1
GO: Biological Process	GO:0002726	positive regulation of T cell cytokine production				0.00526	1	0.0228	0.21	3	21	SASH3,NLRP3,IL6
GO: Biological Process	GO:0007252	I-kappaB phosphorylation				0.00526	1	0.0228	0.21	3	21	TLR7,TLR2,TLR4
GO: Biological Process	GO:1903978	regulation of microglial cell activation				0.00526	1	0.0228	0.21	3	21	PTPRC,TREM2,IL6
GO: Biological Process	GO:0043031	negative regulation of macrophage activation				0.00526	1	0.0228	0.21	3	21	VSIG4,PTPRC,FCGR2B
GO: Biological Process	GO:0010712	regulation of collagen metabolic process				0.00544	1	0.0235	0.217	5	66	ADORA2B,FAP,CCL2,SERPINE1,IL6
GO: Biological Process	GO:0050732	negative regulation of peptidyl-tyrosine phosphorylation				0.00544	1	0.0235	0.217	5	66	CD300A,SAMSN1,PTPRC,LILRB4,IGF1
GO: Biological Process	GO:0031668	cellular response to extracellular stimulus				0.00554	1	0.0239	0.221	11	261	HMOX1,ITGA4,ADORA2B,PTPRC,MMP9,COL1A1,FOLR2,NR4A2,LEP,POSTN,LYN
GO: Biological Process	GO:1901292	nucleoside phosphate catabolic process				0.00555	1	0.024	0.221	6	94	PDE4B,NCF2,SMPDL3A,DPYD,NT5E,SAMHD1
GO: Biological Process	GO:0042509	regulation of tyrosine phosphorylation of STAT protein				0.00555	1	0.024	0.221	6	94	CCL5,LEP,IGF1,LYN,IL6,HCLS1
GO: Biological Process	GO:0031644	regulation of nervous system process				0.00559	1	0.0241	0.222	9	190	IL10,PTAFR,ITGAX,IL33,IGF1,TLR4,TNFRSF1B,CTSS,IL6
GO: Biological Process	GO:0090075	relaxation of muscle				0.00566	1	0.0244	0.225	4	42	PDE4B,ADORA2B,KCNMA1,PLN
GO: Biological Process	GO:0035872	nucleotide-binding domain, leucine rich repeat containing receptor signaling pathway				0.00566	1	0.0244	0.225	4	42	PTPN22,NOD2,BIRC3,TLR4
GO: Biological Process	GO:0035265	organ growth				0.00575	1	0.0245	0.226	10	226	GATA6,CCN4,SASH3,AHR,FGF7,COL14A1,COMP,LEP,ZFPM2,IGF1
GO: Biological Process	GO:0002232	leukocyte chemotaxis involved in inflammatory response				0.0058	1	0.0245	0.226	2	7	SLAMF8,ALOX5
GO: Biological Process	GO:0032911	negative regulation of transforming growth factor beta1 production				0.0058	1	0.0245	0.226	2	7	GATA6,TYROBP
GO: Biological Process	GO:0071608	macrophage inflammatory protein-1 alpha production				0.0058	1	0.0245	0.226	2	7	NOD2,TREM2
GO: Biological Process	GO:0060268	negative regulation of respiratory burst				0.0058	1	0.0245	0.226	2	7	SLAMF8,DUSP10
GO: Biological Process	GO:0014004	microglia differentiation				0.0058	1	0.0245	0.226	2	7	ITGAM,TLR2
GO: Biological Process	GO:0032762	mast cell cytokine production				0.0058	1	0.0245	0.226	2	7	HMOX1,FCER1G
GO: Biological Process	GO:0032730	positive regulation of interleukin-1 alpha production				0.0058	1	0.0245	0.226	2	7	CCL20,CASP1
GO: Biological Process	GO:0044691	tooth eruption				0.0058	1	0.0245	0.226	2	7	TCIRG1,COL1A1
GO: Biological Process	GO:0043376	regulation of CD8-positive, alpha-beta T cell differentiation				0.0058	1	0.0245	0.226	2	7	LILRB4,NCKAP1L
GO: Biological Process	GO:0097187	dentinogenesis				0.0058	1	0.0245	0.226	2	7	TCIRG1,SERPINE1
GO: Biological Process	GO:1904092	regulation of autophagic cell death				0.0058	1	0.0245	0.226	2	7	LAPTM5,TREM2
GO: Biological Process	GO:0002924	negative regulation of humoral immune response mediated by circulating immunoglobulin				0.0058	1	0.0245	0.226	2	7	FCGR2B,CR1
GO: Biological Process	GO:0140507	granzyme-mediated programmed cell death signaling pathway				0.0058	1	0.0245	0.226	2	7	GZMA,GZMB
GO: Biological Process	GO:0060510	type II pneumocyte differentiation				0.0058	1	0.0245	0.226	2	7	GATA6,IGF1
GO: Biological Process	GO:2000660	negative regulation of interleukin-1-mediated signaling pathway				0.0058	1	0.0245	0.226	2	7	IL1RN,IL6
GO: Biological Process	GO:0072679	thymocyte migration				0.0058	1	0.0245	0.226	2	7	CCR2,CCL20
GO: Biological Process	GO:0045917	positive regulation of complement activation				0.0058	1	0.0245	0.226	2	7	C3,CR1
GO: Biological Process	GO:2000553	positive regulation of T-helper 2 cell cytokine production				0.0058	1	0.0245	0.226	2	7	NLRP3,IL6
GO: Biological Process	GO:0060369	positive regulation of Fc receptor mediated stimulatory signaling pathway				0.0058	1	0.0245	0.226	2	7	PTPRC,LYN
GO: Biological Process	GO:0046881	positive regulation of follicle-stimulating hormone secretion				0.0058	1	0.0245	0.226	2	7	INHBA,LEP
GO: Biological Process	GO:0045578	negative regulation of B cell differentiation				0.0058	1	0.0245	0.226	2	7	INHBA,CR1
GO: Biological Process	GO:2001301	lipoxin biosynthetic process				0.0058	1	0.0245	0.226	2	7	ALOX5,ALOX5AP
GO: Biological Process	GO:0002536	respiratory burst involved in inflammatory response				0.0058	1	0.0245	0.226	2	7	SLAMF8,DUSP10
GO: Biological Process	GO:0048880	sensory system development				0.00582	1	0.0246	0.227	16	458	CFH,INHBA,SERPINF1,TCIRG1,ITGAM,ZEB2,TWIST1,CFD,AHR,C1QA,C3,COL5A1,COL8A1,COL8A2,KERA,MFAP5
GO: Biological Process	GO:0071774	response to fibroblast growth factor				0.00596	1	0.0252	0.232	8	158	CCL2,FGF7,CCL5,COL1A1,POSTN,EGR3,CD44,CXCL8
GO: Biological Process	GO:0002040	sprouting angiogenesis				0.00597	1	0.0252	0.233	9	192	IL10,HMOX1,PTGS2,MEOX2,SRPX2,ALOX5,ANXA1,EGR3,GREM1
GO: Biological Process	GO:0071636	positive regulation of transforming growth factor beta production				0.00602	1	0.0253	0.233	3	22	GATA6,PTGS2,LUM
GO: Biological Process	GO:0042053	regulation of dopamine metabolic process				0.00602	1	0.0253	0.233	3	22	ITGAM,ITGB2,NR4A2
GO: Biological Process	GO:0032656	regulation of interleukin-13 production				0.00602	1	0.0253	0.233	3	22	IL33,NLRP3,TLR4
GO: Biological Process	GO:0043306	positive regulation of mast cell degranulation				0.00602	1	0.0253	0.233	3	22	ADORA2B,FCER1G,FGR
GO: Biological Process	GO:0033008	positive regulation of mast cell activation involved in immune response				0.00602	1	0.0253	0.233	3	22	ADORA2B,FCER1G,FGR
GO: Biological Process	GO:0034404	nucleobase-containing small molecule biosynthetic process				0.00603	1	0.0253	0.234	7	126	PDE4B,NCF2,ADA2,SMPDL3A,DPYD,NT5E,SAMHD1
GO: Biological Process	GO:1901135	carbohydrate derivative metabolic process				0.00606	1	0.0254	0.235	35	1310	NPL,PDE4B,MGAT4A,CHI3L1,CHIT1,PTGDR,HPSE,ADA2,ADCY7,GM2A,PYGL,GFPT2,HSD11B1,ST8SIA4,MMP12,HS3ST2,IL33,DPYD,COL11A1,NT5E,AOAH,KERA,SAMHD1,TDO2,OMD,PAPSS2,OGN,LEP,IGF1,VCAN,ST6GALNAC5,CD44,TREM2,LUM,SOAT1
GO: Biological Process	GO:0071634	regulation of transforming growth factor beta production				0.00616	1	0.0258	0.238	4	43	GATA6,PTGS2,TYROBP,LUM
GO: Biological Process	GO:1901186	positive regulation of ERBB signaling pathway				0.00616	1	0.0258	0.238	4	43	EREG,PLAUR,MMP9,AREG
GO: Biological Process	GO:0050850	positive regulation of calcium-mediated signaling				0.00616	1	0.0258	0.238	4	43	TRAT1,CCL4,IGF1,TREM2
GO: Biological Process	GO:0008347	glial cell migration				0.00617	1	0.0258	0.238	5	68	CCR2,CCL2,GPR183,VCAN,TREM2
GO: Biological Process	GO:2000351	regulation of endothelial cell apoptotic process				0.00617	1	0.0258	0.238	5	68	IL10,ITGA4,SCG2,CCL2,SERPINE1
GO: Biological Process	GO:0009266	response to temperature stimulus				0.00619	1	0.0259	0.239	11	265	PDE4B,HMOX1,PLAC8,MICB,CCL2,HSPA6,TFEC,IGF1,CD14,TLR4,LYN
GO: Biological Process	GO:0070848	response to growth factor				0.00623	1	0.026	0.24	24	805	IL10,ASPN,GATA6,TWIST1,NRP2,LPXN,CCL2,FGF7,CCL5,COL1A1,COL1A2,SFRP4,COMP,ANXA1,POSTN,EGR3,LOX,SERPINE1,CD44,GREM1,LUM,TNFRSF1B,IL6,CXCL8
GO: Biological Process	GO:0062012	regulation of small molecule metabolic process				0.00627	1	0.0262	0.242	17	503	CES1,PTAFR,PTGS2,TWIST1,ADORA2B,KCNMA1,HRH1,PLEK,ANXA1,APOC1,APOE,LEP,ABCG1,IGF1,CD36,TREM2,IL6
GO: Biological Process	GO:0043087	regulation of GTPase activity				0.00639	1	0.0267	0.246	17	504	RASGRP3,CCL2,CCL4,CCL5,CCL7,CCL8,CCL11,CCL18,CCL20,VAV1,DOCK2,GPR65,DOCK10,RGS1,PLXNC1,ADAP2,NCKAP1L
GO: Biological Process	GO:1900180	regulation of protein localization to nucleus				0.00641	1	0.0267	0.247	8	160	PTPN22,PTGS2,LILRB4,MDFIC,LEP,CD36,IL6,HCLS1
GO: Biological Process	GO:2001234	negative regulation of apoptotic signaling pathway				0.00653	1	0.0272	0.251	11	267	HMOX1,PTGS2,VNN1,SCG2,PLAUR,MMP9,NR4A2,LGALS3,IGF1,SERPINE1,CD44
GO: Biological Process	GO:0014013	regulation of gliogenesis				0.00656	1	0.0273	0.252	7	128	IL33,IGF1,TLR2,DUSP10,TNFRSF1B,LYN,IL6
GO: Biological Process	GO:0040013	negative regulation of locomotion				0.00668	1	0.0278	0.256	15	424	SLAMF8,CD300A,SERPINF1,HMOX1,MEOX2,ADORA3,CCL2,IL33,GPR18,APOE,MCTP1,SERPINE1,DUSP10,GREM1,IL1RN
GO: Biological Process	GO:0006082	organic acid metabolic process				0.00668	1	0.0278	0.256	31	1130	NPL,MYO5A,CES1,ME1,PTGS2,FABP4,TWIST1,VNN1,DPEP2,C3,GFPT2,ALOX5,ALOX5AP,SDS,DPYD,ANXA1,FOLR2,AOAH,CH25H,APOC1,TDO2,PAPSS2,SLC1A3,LEP,SLC2A3,LIPA,IGF1,CD36,TLR2,DHRS9,TLR4
GO: Biological Process	GO:0032410	negative regulation of transporter activity				0.00679	1	0.0282	0.26	6	98	GEM,TWIST1,KCNE4,CLIC2,MMP9,PLN
GO: Biological Process	GO:0007260	tyrosine phosphorylation of STAT protein				0.00679	1	0.0282	0.26	6	98	CCL5,LEP,IGF1,LYN,IL6,HCLS1
GO: Biological Process	GO:0031643	positive regulation of myelination				0.00683	1	0.0282	0.26	3	23	ITGAX,IGF1,TNFRSF1B
GO: Biological Process	GO:0071676	negative regulation of mononuclear cell migration				0.00683	1	0.0282	0.26	3	23	SLAMF8,CCL2,GREM1
GO: Biological Process	GO:0032674	regulation of interleukin-5 production				0.00683	1	0.0282	0.26	3	23	IL33,LILRB4,NLRP3
GO: Biological Process	GO:0061042	vascular wound healing				0.00683	1	0.0282	0.26	3	23	HPSE,ALOX5,SERPINE1
GO: Biological Process	GO:0002693	positive regulation of cellular extravasation				0.00683	1	0.0282	0.26	3	23	PTAFR,CCR2,CCL2
GO: Biological Process	GO:0071800	podosome assembly				0.00683	1	0.0282	0.26	3	23	BIN2,LCP1,HCK
GO: Biological Process	GO:0007250	activation of NF-kappaB-inducing kinase activity				0.00683	1	0.0282	0.26	3	23	CHI3L1,TLR1,TLR4
GO: Biological Process	GO:0006690	icosanoid metabolic process				0.00684	1	0.0282	0.26	7	129	PTGS2,DPEP2,ALOX5,ALOX5AP,ANXA1,TLR2,TLR4
GO: Biological Process	GO:0071900	regulation of protein serine/threonine kinase activity				0.00688	1	0.0284	0.262	18	550	CD300A,PTPN22,ZEB2,NOD2,ADORA2B,S100A12,PTPRC,PIK3CG,C5AR1,MDFIC,FPR1,APOE,IGF1,TLR4,IRAK3,DUSP10,LYN,IL1RN
GO: Biological Process	GO:0060541	respiratory system development				0.00689	1	0.0284	0.262	11	269	GATA6,CHI3L1,FGF7,HSD11B1,MMP12,ZFPM2,LIPA,IGF1,LOX,CTSD,CTSZ
GO: Biological Process	GO:0034220	ion transmembrane transport				0.00691	1	0.0285	0.263	40	1562	CYBB,TMEM144,PDE4B,MYO5A,TCIRG1,PTPN22,PTAFR,GEM,TWIST1,CCR2,KCNE4,PTPRC,CLIC2,PIK3CG,CXCL9,KCNMA1,AHR,HRH1,CCL2,C3,CCR5,MMP9,PLN,ALOX5,STEAP1,SLC31A2,FOLR2,PPBP,SLC1A3,AQP9,LEP,SLC2A3,IGF1,PIEZO2,CD36,AOC3,TREM2,LYN,SLC38A6,CTSS
GO: Biological Process	GO:0070527	platelet aggregation				0.00697	1	0.0287	0.264	5	70	CFH,PIK3CG,PLEK,COMP,LYN
GO: Biological Process	GO:0021700	developmental maturation				0.00711	1	0.0292	0.27	13	347	EREG,MYO5A,CLEC7A,PTGS2,BTK,KCNMA1,C1QA,C3,MMP2,NR4A2,LEP,IGF1,GREM1
GO: Biological Process	GO:0030203	glycosaminoglycan metabolic process				0.00714	1	0.0294	0.271	8	163	HPSE,HS3ST2,KERA,OMD,OGN,VCAN,CD44,LUM
GO: Biological Process	GO:0071604	transforming growth factor beta production				0.00724	1	0.0297	0.274	4	45	GATA6,PTGS2,TYROBP,LUM
GO: Biological Process	GO:0062208	positive regulation of pattern recognition receptor signaling pathway				0.00724	1	0.0297	0.274	4	45	PTPN22,TLR1,TLR2,TLR4
GO: Biological Process	GO:0006040	amino sugar metabolic process				0.00724	1	0.0297	0.274	4	45	NPL,CHI3L1,CHIT1,GFPT2
GO: Biological Process	GO:0051098	regulation of binding				0.00725	1	0.0297	0.274	15	428	IL10,HMOX1,ITGA4,TWIST1,CLIC2,PLAUR,MMP9,PLN,APOE,RUNX1T1,IGF1,LOX,GZMA,TLR4,CTSZ
GO: Biological Process	GO:0046622	positive regulation of organ growth				0.00739	1	0.0303	0.279	5	71	GATA6,CCN4,SASH3,ZFPM2,IGF1
GO: Biological Process	GO:1901653	cellular response to peptide				0.0074	1	0.0303	0.279	15	429	MYO5A,TCIRG1,PTPN22,ITGA4,ADCY7,NOD2,PTPRE,FCGR2B,NR4A2,LEP,IGF1,CD36,TLR4,TREM2,LYN
GO: Biological Process	GO:0051209	release of sequestered calcium ion into cytosol				0.00742	1	0.0303	0.28	7	131	MYO5A,PTPRC,CLIC2,CXCL9,CCR5,PLN,LYN
GO: Biological Process	GO:0070304	positive regulation of stress-activated protein kinase signaling cascade				0.00742	1	0.0303	0.28	7	131	RASSF2,CLEC7A,NOD2,FCGR2B,LEP,TLR4,LYN
GO: Biological Process	GO:0019886	antigen processing and presentation of exogenous peptide antigen via MHC class II				0.00747	1	0.0305	0.281	6	100	HLA-DMA,HLA-DRB4,FCER1G,FCGR2B,CTSD,CTSS
GO: Biological Process	GO:0061097	regulation of protein tyrosine kinase activity				0.00747	1	0.0305	0.281	6	100	EREG,PTPRC,CCL5,LILRB4,AREG,GREM1
GO: Biological Process	GO:0010950	positive regulation of endopeptidase activity				0.00749	1	0.0305	0.282	9	199	CLEC7A,LAPTM5,S100A8,S100A9,CASP1,CR1,NLRP3,LYN,CTSD
GO: Biological Process	GO:0051701	biological process involved in interaction with host				0.00749	1	0.0305	0.282	10	235	CLEC5A,TRIM22,FCN1,CCR5,MMP9,MRC1,CR1,CD86,LAMP3,CXCL8
GO: Biological Process	GO:0022604	regulation of cell morphogenesis				0.00762	1	0.0307	0.283	13	350	ITGB2,CCL2,CCL7,CCL11,FGR,RAC2,LST1,ANXA1,POSTN,PLXNC1,CD44,HCK,IL6
GO: Biological Process	GO:0031622	positive regulation of fever generation				0.00764	1	0.0307	0.283	2	8	PTGS2,CCL5
GO: Biological Process	GO:0070487	monocyte aggregation				0.00764	1	0.0307	0.283	2	8	CFH,CD44
GO: Biological Process	GO:0032119	sequestering of zinc ion				0.00764	1	0.0307	0.283	2	8	S100A8,S100A9
GO: Biological Process	GO:0061518	microglial cell proliferation				0.00764	1	0.0307	0.283	2	8	IL33,TREM2
GO: Biological Process	GO:0002317	plasma cell differentiation				0.00764	1	0.0307	0.283	2	8	IL10,CR1
GO: Biological Process	GO:0043307	eosinophil activation				0.00764	1	0.0307	0.283	2	8	CD300A,CCR2
GO: Biological Process	GO:0051045	negative regulation of membrane protein ectodomain proteolysis				0.00764	1	0.0307	0.283	2	8	IL10,TIMP2
GO: Biological Process	GO:0061044	negative regulation of vascular wound healing				0.00764	1	0.0307	0.283	2	8	ALOX5,SERPINE1
GO: Biological Process	GO:2000646	positive regulation of receptor catabolic process				0.00764	1	0.0307	0.283	2	8	LAPTM5,APOE
GO: Biological Process	GO:1900223	positive regulation of amyloid-beta clearance				0.00764	1	0.0307	0.283	2	8	APOE,TREM2
GO: Biological Process	GO:0030885	regulation of myeloid dendritic cell activation				0.00764	1	0.0307	0.283	2	8	IL10,CD2
GO: Biological Process	GO:0002767	immune response-inhibiting cell surface receptor signaling pathway				0.00764	1	0.0307	0.283	2	8	LILRB4,LYN
GO: Biological Process	GO:0050904	diapedesis				0.00764	1	0.0307	0.283	2	8	ITGA4,CCL5
GO: Biological Process	GO:0010886	positive regulation of cholesterol storage				0.00764	1	0.0307	0.283	2	8	MSR1,CD36
GO: Biological Process	GO:0032278	positive regulation of gonadotropin secretion				0.00764	1	0.0307	0.283	2	8	INHBA,LEP
GO: Biological Process	GO:2001300	lipoxin metabolic process				0.00764	1	0.0307	0.283	2	8	ALOX5,ALOX5AP
GO: Biological Process	GO:1904415	regulation of xenophagy				0.00764	1	0.0307	0.283	2	8	NOD2,TLR2
GO: Biological Process	GO:1904417	positive regulation of xenophagy				0.00764	1	0.0307	0.283	2	8	NOD2,TLR2
GO: Biological Process	GO:0035425	autocrine signaling				0.00764	1	0.0307	0.283	2	8	S100A8,S100A9
GO: Biological Process	GO:0042069	regulation of catecholamine metabolic process				0.00771	1	0.0309	0.285	3	24	ITGAM,ITGB2,NR4A2
GO: Biological Process	GO:0032634	interleukin-5 production				0.00771	1	0.0309	0.285	3	24	IL33,LILRB4,NLRP3
GO: Biological Process	GO:0001991	regulation of systemic arterial blood pressure by circulatory renin-angiotensin				0.00771	1	0.0309	0.285	3	24	CES1,CPA3,CTSZ
GO: Biological Process	GO:0051283	negative regulation of sequestering of calcium ion				0.00772	1	0.0309	0.285	7	132	MYO5A,PTPRC,CLIC2,CXCL9,CCR5,PLN,LYN
GO: Biological Process	GO:0071363	cellular response to growth factor stimulus				0.00773	1	0.0309	0.285	23	775	IL10,ASPN,GATA6,TWIST1,NRP2,LPXN,CCL2,FGF7,CCL5,COL1A1,COL1A2,SFRP4,COMP,ANXA1,POSTN,EGR3,LOX,SERPINE1,CD44,GREM1,TNFRSF1B,IL6,CXCL8
GO: Biological Process	GO:1903522	regulation of blood circulation				0.00779	1	0.0312	0.287	13	351	PDE4B,PTAFR,PTGS2,ADORA3,KCNE4,CLIC2,PIK3CG,AHR,HRH1,MMP2,PLN,ALOX5,LEP
GO: Biological Process	GO:0002251	organ or tissue specific immune response				0.00782	1	0.0312	0.288	4	46	CFH,NOD2,RNASE2,IL6
GO: Biological Process	GO:0034383	low-density lipoprotein particle clearance				0.00782	1	0.0312	0.288	4	46	HMOX1,LIPA,CD36,SOAT1
GO: Biological Process	GO:0090495	low-density lipoprotein particle disassembly				0.00782	1	0.0312	0.288	4	46	HMOX1,LIPA,CD36,SOAT1
GO: Biological Process	GO:0010874	regulation of cholesterol efflux				0.00782	1	0.0312	0.288	4	46	CES1,PLTP,APOE,ABCG1
GO: Biological Process	GO:0060420	regulation of heart growth				0.00783	1	0.0312	0.288	6	101	GATA6,CCN4,AHR,COL14A1,ZFPM2,IGF1
GO: Biological Process	GO:0042267	natural killer cell mediated cytotoxicity				0.00783	1	0.0312	0.288	5	72	VAV1,LEP,GZMB,CRTAM,SLAMF7
GO: Biological Process	GO:0051651	maintenance of location in cell				0.00793	1	0.0316	0.291	10	237	MYO5A,S100A8,S100A9,PTPRC,CLIC2,CXCL9,CCR5,PLN,APOE,LYN
GO: Biological Process	GO:0014074	response to purine-containing compound				0.00794	1	0.0316	0.291	8	166	PTAFR,PIK3CG,AHR,COL1A1,SELL,CASP1,AQP9,THBD
GO: Biological Process	GO:0098869	cellular oxidant detoxification				0.00821	1	0.0326	0.301	6	102	PTGS2,S100A9,CLIC2,ALOX5AP,APOE,CD36
GO: Biological Process	GO:0051702	biological process involved in interaction with symbiont				0.00821	1	0.0326	0.301	6	102	CCL4,CCL5,CCL8,CXCL6,APOE,TREM1
GO: Biological Process	GO:0007190	activation of adenylate cyclase activity				0.00822	1	0.0326	0.301	8	167	PDE4B,ADGRE2,ADCY7,ADORA2B,ADORA3,CXCL9,PLN,GPR65
GO: Biological Process	GO:0014911	positive regulation of smooth muscle cell migration				0.0083	1	0.0329	0.303	5	73	MYO5A,CCN4,CCL5,POSTN,IGF1
GO: Biological Process	GO:0072577	endothelial cell apoptotic process				0.0083	1	0.0329	0.303	5	73	IL10,ITGA4,SCG2,CCL2,SERPINE1
GO: Biological Process	GO:0051282	regulation of sequestering of calcium ion				0.00836	1	0.0331	0.305	7	134	MYO5A,PTPRC,CLIC2,CXCL9,CCR5,PLN,LYN
GO: Biological Process	GO:1905954	positive regulation of lipid localization				0.00836	1	0.0331	0.305	7	134	CES1,C3,PLTP,APOE,MSR1,ABCG1,CD36
GO: Biological Process	GO:0046822	regulation of nucleocytoplasmic transport				0.00836	1	0.0331	0.305	7	134	PTPN22,PTGS2,MDFIC,LEP,CD36,IL6,HCLS1
GO: Biological Process	GO:0032787	monocarboxylic acid metabolic process				0.00843	1	0.0333	0.308	21	692	MYO5A,CES1,ME1,PTGS2,FABP4,TWIST1,VNN1,C3,ALOX5,ALOX5AP,SDS,ANXA1,AOAH,CH25H,APOC1,SLC1A3,LEP,LIPA,IGF1,CD36,DHRS9
GO: Biological Process	GO:0016042	lipid catabolic process				0.00852	1	0.0337	0.31	13	355	CES1,FABP4,TWIST1,SMPDL3A,PIK3CG,GM2A,HSD11B1,PLA2G7,AOAH,APOC1,APOE,LEP,LIPA
GO: Biological Process	GO:0051668	localization within membrane				0.00859	1	0.0339	0.312	6	103	ITGA4,ITGB2,PTPRC,DOCK2,APOE,CD2
GO: Biological Process	GO:0045921	positive regulation of exocytosis				0.00859	1	0.0339	0.312	6	103	PTAFR,ITGAM,ITGB2,ADORA2B,FCER1G,FGR
GO: Biological Process	GO:0006910	phagocytosis, recognition				0.00859	1	0.0339	0.312	6	103	CLEC7A,FCN1,CD36,IGKC,IGLC1,TRBC1
GO: Biological Process	GO:0060252	positive regulation of glial cell proliferation				0.00865	1	0.034	0.313	3	25	IGF1,LYN,IL6
GO: Biological Process	GO:0090335	regulation of brown fat cell differentiation				0.00865	1	0.034	0.313	3	25	PTGS2,LEP,DUSP10
GO: Biological Process	GO:0032616	interleukin-13 production				0.00865	1	0.034	0.313	3	25	IL33,NLRP3,TLR4
GO: Biological Process	GO:0043931	ossification involved in bone maturation				0.00865	1	0.034	0.313	3	25	LEP,IGF1,GREM1
GO: Biological Process	GO:1903975	regulation of glial cell migration				0.00865	1	0.034	0.313	3	25	CCR2,GPR183,TREM2
GO: Biological Process	GO:0046620	regulation of organ growth				0.00869	1	0.0341	0.315	7	135	GATA6,CCN4,SASH3,AHR,COL14A1,ZFPM2,IGF1
GO: Biological Process	GO:0031330	negative regulation of cellular catabolic process				0.00872	1	0.0342	0.315	11	278	IL10,IL10RA,PTPN22,HMOX1,PIK3CG,TENT5A,APOC1,LEP,TIMP2,TREM2,LAMP3
GO: Biological Process	GO:0071230	cellular response to amino acid stimulus				0.00878	1	0.0344	0.317	5	74	CYBB,MMP2,COL1A1,COL1A2,COL16A1
GO: Biological Process	GO:0031589	cell-substrate adhesion				0.00885	1	0.0347	0.32	14	397	ITGA4,HPSE,ITGB2,LPXN,MMP12,RAC2,COL1A1,COL8A1,COL16A1,POSTN,CD36,SERPINE1,CD44,GREM1
GO: Biological Process	GO:0007188	adenylate cyclase-modulating G protein-coupled receptor signaling pathway				0.00887	1	0.0347	0.32	10	241	PDE4B,ADGRE2,ADCY7,ADORA2B,CXCL9,GNA15,PLN,GPR65,FPR1,RGS1
GO: Biological Process	GO:1903035	negative regulation of response to wounding				0.00899	1	0.0351	0.324	6	104	FAP,PLAUR,ALOX5,APOE,THBD,SERPINE1
GO: Biological Process	GO:0051591	response to cAMP				0.00899	1	0.0351	0.324	6	104	PTAFR,PIK3CG,AHR,COL1A1,AQP9,THBD
GO: Biological Process	GO:0032355	response to estradiol				0.00903	1	0.0353	0.325	7	136	IL10,MMP2,COL1A1,ANXA1,LEP,AREG,POSTN
GO: Biological Process	GO:1904037	positive regulation of epithelial cell apoptotic process				0.00908	1	0.0354	0.327	4	48	ITGA4,CCL2,SFRP4,IL6
GO: Biological Process	GO:0009268	response to pH				0.00908	1	0.0354	0.327	4	48	SERPINF1,KCNMA1,GPR65,CTSS
GO: Biological Process	GO:0031334	positive regulation of protein-containing complex assembly				0.00917	1	0.0357	0.33	11	280	CLEC7A,AHR,CCL11,MMP1,PLEK,LCP1,LGALS3,CD36,TLR4,HCK,NCKAP1L
GO: Biological Process	GO:0002228	natural killer cell mediated immunity				0.00927	1	0.0361	0.333	5	75	VAV1,LEP,GZMB,CRTAM,SLAMF7
GO: Biological Process	GO:0002479	antigen processing and presentation of exogenous peptide antigen via MHC class I, TAP-dependent				0.00927	1	0.0361	0.333	5	75	CYBB,NCF2,NCF4,FCGR1B,CD36
GO: Biological Process	GO:0010469	regulation of signaling receptor activity				0.00929	1	0.0361	0.333	9	206	IL10,EREG,CCR2,FCGR2B,CCL2,LILRB4,AREG,SERPINE1,GREM1
GO: Biological Process	GO:1900407	regulation of cellular response to oxidative stress				0.0094	1	0.0365	0.337	6	105	IL10,ITGAM,VNN1,ALOX5,CD36,TLR4
GO: Biological Process	GO:0043523	regulation of neuron apoptotic process				0.0094	1	0.0365	0.337	11	281	IL10,NCF2,HMOX1,ITGAM,TYROBP,KCNMA1,CCL2,C5AR1,NR4A2,APOE,CTSZ
GO: Biological Process	GO:0022008	neurogenesis				0.00948	1	0.0368	0.34	47	1940	CFH,INHBA,SERPINF1,ITGA4,ITGAM,ZEB2,TWIST1,NRP2,CCR2,S100A8,S100A9,KCNMA1,C1QA,CCL2,C3,CCL5,CCL11,C5AR1,MMP2,IL33,RAC2,LST1,PRRX1,ANXA1,NR4A2,DOCK10,GPR183,APOE,SLC1A3,LEP,AREG,POSTN,IGF1,TIMP2,PLXNC1,VCAN,TLR2,TLR4,CD44,TREM2,DUSP10,TNFRSF1B,LYN,IL6,CTSZ,NCKAP1L,PHACTR1
GO: Biological Process	GO:0032386	regulation of intracellular transport				0.00961	1	0.0369	0.34	14	401	PTPN22,ITGAM,ITGB2,PTGS2,CCL2,PLN,RAC2,MDFIC,LCP1,LEP,CD36,GZMB,IL6,HCLS1
GO: Biological Process	GO:0050765	negative regulation of phagocytosis				0.00966	1	0.0369	0.34	3	26	CD300A,FCGR2B,TLR2
GO: Biological Process	GO:0031579	membrane raft organization				0.00966	1	0.0369	0.34	3	26	PTPRC,DOCK2,CD2
GO: Biological Process	GO:0010447	response to acidic pH				0.00966	1	0.0369	0.34	3	26	SERPINF1,GPR65,CTSS
GO: Biological Process	GO:0001573	ganglioside metabolic process				0.00966	1	0.0369	0.34	3	26	GM2A,ST8SIA4,ST6GALNAC5
GO: Biological Process	GO:1904304	regulation of gastro-intestinal system smooth muscle contraction				0.00971	1	0.0369	0.34	2	9	PTAFR,KCNMA1
GO: Biological Process	GO:0031666	positive regulation of lipopolysaccharide-mediated signaling pathway				0.00971	1	0.0369	0.34	2	9	LY96,LY86
GO: Biological Process	GO:0060242	contact inhibition				0.00971	1	0.0369	0.34	2	9	FAP,SRPX
GO: Biological Process	GO:0060245	detection of cell density				0.00971	1	0.0369	0.34	2	9	FAP,SRPX
GO: Biological Process	GO:0060267	positive regulation of respiratory burst				0.00971	1	0.0369	0.34	2	9	CLEC7A,JCHAIN
GO: Biological Process	GO:1903753	negative regulation of p38MAPK cascade				0.00971	1	0.0369	0.34	2	9	PTPN22,DUSP10
GO: Biological Process	GO:0070432	regulation of nucleotide-binding oligomerization domain containing 2 signaling pathway				0.00971	1	0.0369	0.34	2	9	PTPN22,TLR4
GO: Biological Process	GO:1901072	glucosamine-containing compound catabolic process				0.00971	1	0.0369	0.34	2	9	CHI3L1,CHIT1
GO: Biological Process	GO:0031394	positive regulation of prostaglandin biosynthetic process				0.00971	1	0.0369	0.34	2	9	PTGS2,ANXA1
GO: Biological Process	GO:0060753	regulation of mast cell chemotaxis				0.00971	1	0.0369	0.34	2	9	CCL5,RAC2
GO: Biological Process	GO:1901897	regulation of relaxation of cardiac muscle				0.00971	1	0.0369	0.34	2	9	PDE4B,PLN
GO: Biological Process	GO:0035022	positive regulation of Rac protein signal transduction				0.00971	1	0.0369	0.34	2	9	PIK3CG,DOCK2
GO: Biological Process	GO:0060087	relaxation of vascular associated smooth muscle				0.00971	1	0.0369	0.34	2	9	ADORA2B,KCNMA1
GO: Biological Process	GO:0033239	negative regulation of cellular amine metabolic process				0.00971	1	0.0369	0.34	2	9	ITGAM,ITGB2
GO: Biological Process	GO:0071225	cellular response to muramyl dipeptide				0.00971	1	0.0369	0.34	2	9	PTPN22,NOD2
GO: Biological Process	GO:1904783	positive regulation of NMDA glutamate receptor activity				0.00971	1	0.0369	0.34	2	9	CCR2,CCL2
GO: Biological Process	GO:1900227	positive regulation of NLRP3 inflammasome complex assembly				0.00971	1	0.0369	0.34	2	9	CD36,TLR4
GO: Biological Process	GO:0034351	negative regulation of glial cell apoptotic process				0.00971	1	0.0369	0.34	2	9	CCL2,IGF1
GO: Biological Process	GO:0002732	positive regulation of dendritic cell cytokine production				0.00971	1	0.0369	0.34	2	9	CLEC7A,NOD2
GO: Biological Process	GO:0034382	chylomicron remnant clearance				0.00971	1	0.0369	0.34	2	9	APOC1,APOE
GO: Biological Process	GO:0033034	positive regulation of myeloid cell apoptotic process				0.00971	1	0.0369	0.34	2	9	ANXA1,CD44
GO: Biological Process	GO:0006868	glutamine transport				0.00971	1	0.0369	0.34	2	9	LEP,SLC38A6
GO: Biological Process	GO:0046880	regulation of follicle-stimulating hormone secretion				0.00971	1	0.0369	0.34	2	9	INHBA,LEP
GO: Biological Process	GO:0071830	triglyceride-rich lipoprotein particle clearance				0.00971	1	0.0369	0.34	2	9	APOC1,APOE
GO: Biological Process	GO:0010873	positive regulation of cholesterol esterification				0.00971	1	0.0369	0.34	2	9	APOC1,APOE
GO: Biological Process	GO:0045588	positive regulation of gamma-delta T cell differentiation				0.00971	1	0.0369	0.34	2	9	PTPRC,NCKAP1L
GO: Biological Process	GO:0002578	negative regulation of antigen processing and presentation				0.00971	1	0.0369	0.34	2	9	FGL2,FCGR2B
GO: Biological Process	GO:0045627	positive regulation of T-helper 1 cell differentiation				0.00971	1	0.0369	0.34	2	9	CCR2,ANXA1
GO: Biological Process	GO:0034112	positive regulation of homotypic cell-cell adhesion				0.00971	1	0.0369	0.34	2	9	CCL5,PLAUR
GO: Biological Process	GO:0051208	sequestering of calcium ion				0.00974	1	0.0369	0.34	7	138	MYO5A,PTPRC,CLIC2,CXCL9,CCR5,PLN,LYN
GO: Biological Process	GO:2000404	regulation of T cell migration				0.00976	1	0.0369	0.34	4	49	ITGA4,CCR2,CCL5,CCL20
GO: Biological Process	GO:0050691	regulation of defense response to virus by host				0.00976	1	0.0369	0.34	4	49	PTPN22,MICB,CCL5,MMP12
GO: Biological Process	GO:0006509	membrane protein ectodomain proteolysis				0.00976	1	0.0369	0.34	4	49	IL10,APOE,TIMP2,TNFRSF1B
GO: Biological Process	GO:0045907	positive regulation of vasoconstriction				0.00976	1	0.0369	0.34	4	49	PTAFR,PTGS2,HRH1,ALOX5
GO: Biological Process	GO:0001541	ovarian follicle development				0.00979	1	0.037	0.341	5	76	EREG,INHBA,AHR,FGF7,MMP2
GO: Biological Process	GO:0002753	cytoplasmic pattern recognition receptor signaling pathway				0.00979	1	0.037	0.341	5	76	PTPN22,NOD2,IFIH1,BIRC3,TLR4
GO: Biological Process	GO:0055085	transmembrane transport				0.00979	1	0.037	0.341	44	1794	CYBB,TMEM144,PDE4B,MYO5A,SLCO2B1,TCIRG1,PTPN22,PTAFR,GEM,TWIST1,CCR2,KCNE4,PTPRC,CLIC2,PIK3CG,CXCL9,KCNMA1,AHR,HRH1,CCL2,C3,CCR5,MMP9,PLN,ALOX5,STEAP1,SLC31A2,FOLR2,PPBP,SLC1A3,AQP9,LEP,SLC2A3,ABCG1,SLC46A3,IGF1,PIEZO2,SLC16A6,CD36,AOC3,TREM2,LYN,SLC38A6,CTSS
GO: Biological Process	GO:0046434	organophosphate catabolic process				0.0101	1	0.0379	0.349	8	173	PDE4B,NCF2,SMPDL3A,PLA2G7,DPYD,NT5E,SAMHD1,APOC1
GO: Biological Process	GO:0000187	activation of MAPK activity				0.0101	1	0.0379	0.349	8	173	NOD2,ADORA2B,PTPRC,C5AR1,MDFIC,FPR1,IGF1,TLR4
GO: Biological Process	GO:0014812	muscle cell migration				0.0101	1	0.0381	0.351	7	139	MYO5A,CCN4,CCL5,ANXA1,POSTN,IGF1,SERPINE1
GO: Biological Process	GO:0032388	positive regulation of intracellular transport				0.0102	1	0.0382	0.352	10	246	PTPN22,ITGAM,ITGB2,PTGS2,CCL2,RAC2,LEP,GZMB,IL6,HCLS1
GO: Biological Process	GO:0048545	response to steroid hormone				0.0104	1	0.039	0.36	13	364	CYBB,IL10,SERPINF1,PTAFR,KCNMA1,COL1A1,ANXA1,AREG,IGF1,LOX,TLR2,IL1RN,IL6
GO: Biological Process	GO:0050974	detection of mechanical stimulus involved in sensory perception				0.0105	1	0.0393	0.363	4	50	COL11A1,IGF1,PIEZO2,TLR4
GO: Biological Process	GO:0043434	response to peptide hormone				0.0107	1	0.0402	0.371	16	490	CYBB,IL10,EREG,MYO5A,TCIRG1,ADCY7,ADORA2B,PTPRE,PLN,COL1A1,ANXA1,NR4A2,LEP,IGF1,TLR2,LYN
GO: Biological Process	GO:0001911	negative regulation of leukocyte mediated cytotoxicity				0.0107	1	0.0402	0.371	3	27	PTPRC,FCGR2B,IL7R
GO: Biological Process	GO:0032700	negative regulation of interleukin-17 production				0.0107	1	0.0402	0.371	3	27	TLR2,TLR4,NCKAP1L
GO: Biological Process	GO:0010560	positive regulation of glycoprotein biosynthetic process				0.0107	1	0.0402	0.371	3	27	IL33,IGF1,SOAT1
GO: Biological Process	GO:1902993	positive regulation of amyloid precursor protein catabolic process				0.0107	1	0.0402	0.371	3	27	APOE,ABCG1,LYN
GO: Biological Process	GO:0048714	positive regulation of oligodendrocyte differentiation				0.0107	1	0.0402	0.371	3	27	IL33,TLR2,TNFRSF1B
GO: Biological Process	GO:0008643	carbohydrate transport				0.0111	1	0.0414	0.382	8	176	TMEM144,C3,PPBP,AQP9,LEP,SLC2A3,IGF1,AOC3
GO: Biological Process	GO:0001961	positive regulation of cytokine-mediated signaling pathway				0.0112	1	0.0419	0.386	4	51	LAPTM5,MMP12,CASP1,TREM2
GO: Biological Process	GO:0048713	regulation of oligodendrocyte differentiation				0.0112	1	0.0419	0.386	4	51	IL33,TLR2,DUSP10,TNFRSF1B
GO: Biological Process	GO:0034219	carbohydrate transmembrane transport				0.0113	1	0.0421	0.389	7	142	TMEM144,C3,PPBP,LEP,SLC2A3,IGF1,AOC3
GO: Biological Process	GO:0006694	steroid biosynthetic process				0.0114	1	0.0425	0.392	9	213	CES1,ADORA2B,HRH1,HSD11B1,CH25H,APOE,LEP,ABCG1,IGF1
GO: Biological Process	GO:0090049	regulation of cell migration involved in sprouting angiogenesis				0.0115	1	0.0428	0.394	5	79	HMOX1,PTGS2,MEOX2,SRPX2,ANXA1
GO: Biological Process	GO:0031400	negative regulation of protein modification process				0.0115	1	0.043	0.396	19	624	RASSF2,CD300A,PTPN22,SAMSN1,FABP4,TWIST1,PTPRC,LILRB4,NIBAN1,APOE,LGALS3,IGF1,IRAK3,DUSP10,GREM1,LYN,IL6,NCKAP1L,PHACTR1
GO: Biological Process	GO:0007423	sensory organ development				0.0117	1	0.0434	0.4	20	669	CFH,HLA-DMA,INHBA,SERPINF1,TCIRG1,ZEB2,TWIST1,CFD,KCNMA1,AHR,C1QB,C3,COL5A1,COL8A1,COL8A2,PRRX1,COL11A1,KERA,MFAP5,IGF1
GO: Biological Process	GO:0046889	positive regulation of lipid biosynthetic process				0.0117	1	0.0434	0.4	6	110	PTGS2,ADORA2B,ANXA1,APOE,ABCG1,IGF1
GO: Biological Process	GO:0006024	glycosaminoglycan biosynthetic process				0.0117	1	0.0434	0.4	6	110	HS3ST2,KERA,OMD,OGN,VCAN,LUM
GO: Biological Process	GO:0005975	carbohydrate metabolic process				0.0118	1	0.0437	0.403	20	670	NPL,CHI3L1,PTAFR,CHIT1,ME1,ADORA2B,HRH1,GM2A,PYGL,HSD11B1,PLEK,ST8SIA4,SDS,AOAH,LEP,SLC2A3,IGF1,CD36,ST6GALNAC5,IL6
GO: Biological Process	GO:0045927	positive regulation of growth				0.0118	1	0.0437	0.403	12	330	GATA6,S100A8,CCN4,S100A9,SASH3,AHR,C3,APOE,LEP,ZFPM2,IGF1,SERPINE1
GO: Biological Process	GO:0032682	negative regulation of chemokine production				0.0119	1	0.0437	0.403	3	28	IL10,LILRB4,IL6
GO: Biological Process	GO:0070977	bone maturation				0.0119	1	0.0437	0.403	3	28	LEP,IGF1,GREM1
GO: Biological Process	GO:0034505	tooth mineralization				0.0119	1	0.0437	0.403	3	28	ASPN,TCIRG1,COL1A1
GO: Biological Process	GO:0006837	serotonin transport				0.0119	1	0.0437	0.403	3	28	CD300A,FCER1G,LGALS3
GO: Biological Process	GO:0060343	trabecula formation				0.0119	1	0.0437	0.403	3	28	MMP2,COL1A1,GREM1
GO: Biological Process	GO:0034123	positive regulation of toll-like receptor signaling pathway				0.0119	1	0.0437	0.403	3	28	PTPN22,TLR1,TLR2
GO: Biological Process	GO:0034114	regulation of heterotypic cell-cell adhesion				0.0119	1	0.0437	0.403	3	28	IL10,CD44,IL1RN
GO: Biological Process	GO:0007160	cell-matrix adhesion				0.0119	1	0.0437	0.403	10	252	ITGA4,HPSE,ITGB2,MMP12,COL16A1,POSTN,CD36,SERPINE1,CD44,GREM1
GO: Biological Process	GO:1904707	positive regulation of vascular associated smooth muscle cell proliferation				0.012	1	0.0437	0.403	4	52	IL10,MMP2,MMP9,IGF1
GO: Biological Process	GO:1903170	negative regulation of calcium ion transmembrane transport				0.012	1	0.0437	0.403	4	52	GEM,CLIC2,AHR,PLN
GO: Biological Process	GO:0045581	negative regulation of T cell differentiation				0.012	1	0.0437	0.403	4	52	FGL2,LILRB4,ANXA1,CD44
GO: Biological Process	GO:0031952	regulation of protein autophosphorylation				0.012	1	0.0437	0.403	4	52	RASSF2,PTPRC,GPNMB,GREM1
GO: Biological Process	GO:0019933	cAMP-mediated signaling				0.012	1	0.0437	0.403	11	291	PDE4B,ADGRE2,ADCY7,ADORA2B,CXCL9,AHR,GNA15,PLN,GPR65,FPR1,RGS1
GO: Biological Process	GO:0002291	T cell activation via T cell receptor contact with antigen bound to MHC molecule on antigen presenting cell				0.012	1	0.0437	0.403	2	10	FGL2,LGALS3
GO: Biological Process	GO:0031620	regulation of fever generation				0.012	1	0.0437	0.403	2	10	PTGS2,CCL5
GO: Biological Process	GO:2000109	regulation of macrophage apoptotic process				0.012	1	0.0437	0.403	2	10	NOD2,CCL5
GO: Biological Process	GO:0034447	very-low-density lipoprotein particle clearance				0.012	1	0.0437	0.403	2	10	APOC1,APOE
GO: Biological Process	GO:0002158	osteoclast proliferation				0.012	1	0.0437	0.403	2	10	TCIRG1,GREM1
GO: Biological Process	GO:0010533	regulation of activation of Janus kinase activity				0.012	1	0.0437	0.403	2	10	CD300A,CCL5
GO: Biological Process	GO:0010519	negative regulation of phospholipase activity				0.012	1	0.0437	0.403	2	10	PLEK,ANXA1
GO: Biological Process	GO:0051918	negative regulation of fibrinolysis				0.012	1	0.0437	0.403	2	10	THBD,SERPINE1
GO: Biological Process	GO:2000659	regulation of interleukin-1-mediated signaling pathway				0.012	1	0.0437	0.403	2	10	IL1RN,IL6
GO: Biological Process	GO:0030854	positive regulation of granulocyte differentiation				0.012	1	0.0437	0.403	2	10	EVI2B,HCLS1
GO: Biological Process	GO:0045916	negative regulation of complement activation				0.012	1	0.0437	0.403	2	10	VSIG4,CR1
GO: Biological Process	GO:0070099	regulation of chemokine-mediated signaling pathway				0.012	1	0.0437	0.403	2	10	CCL5,TREM2
GO: Biological Process	GO:0002765	immune response-inhibiting signal transduction				0.012	1	0.0437	0.403	2	10	LILRB4,LYN
GO: Biological Process	GO:0002759	regulation of antimicrobial humoral response				0.012	1	0.0437	0.403	2	10	GATA6,NOD2
GO: Biological Process	GO:1903223	positive regulation of oxidative stress-induced neuron death				0.012	1	0.0437	0.403	2	10	ITGAM,TLR4
GO: Biological Process	GO:0010887	negative regulation of cholesterol storage				0.012	1	0.0437	0.403	2	10	CES1,ABCG1
GO: Biological Process	GO:0086023	adenylate cyclase-activating adrenergic receptor signaling pathway involved in heart process				0.012	1	0.0437	0.403	2	10	PDE4B,PLN
GO: Biological Process	GO:0051541	elastin metabolic process				0.012	1	0.0437	0.403	2	10	MMP12,LEP
GO: Biological Process	GO:0002579	positive regulation of antigen processing and presentation				0.012	1	0.0437	0.403	2	10	NOD2,TREM2
GO: Biological Process	GO:0045454	cell redox homeostasis				0.0121	1	0.0438	0.404	5	80	CYBB,NCF2,NCF4,RAC2,IL6
GO: Biological Process	GO:0046824	positive regulation of nucleocytoplasmic transport				0.0121	1	0.0438	0.404	5	80	PTPN22,PTGS2,LEP,IL6,HCLS1
GO: Biological Process	GO:0001101	response to acid chemical				0.0121	1	0.044	0.406	7	144	CYBB,MMP2,COL1A1,COL1A2,COL16A1,SLC1A3,LYN
GO: Biological Process	GO:0044706	multi-multicellular organism process				0.0122	1	0.0442	0.408	10	253	PTAFR,PTGS2,ADCY7,MMP2,MMP9,MMP12,COL16A1,EPYC,LEP,THBD
GO: Biological Process	GO:0010952	positive regulation of peptidase activity				0.0124	1	0.0449	0.415	9	216	CLEC7A,LAPTM5,S100A8,S100A9,CASP1,CR1,NLRP3,LYN,CTSD
GO: Biological Process	GO:1905477	positive regulation of protein localization to membrane				0.0126	1	0.0455	0.42	7	145	MYO5A,ITGAM,ITGB2,CCL2,LGALS3,GZMB,TREM2
GO: Biological Process	GO:0046328	regulation of JNK cascade				0.0126	1	0.0455	0.42	7	145	RASSF2,PTPN22,NOD2,FCGR2B,SFRP4,TLR4,DUSP10
GO: Biological Process	GO:0051926	negative regulation of calcium ion transport				0.0127	1	0.0459	0.423	5	81	GEM,PTGS2,CLIC2,AHR,PLN
GO: Biological Process	GO:0043616	keratinocyte proliferation				0.0128	1	0.0462	0.427	4	53	EREG,FGF7,AREG,TLR4
GO: Biological Process	GO:0042088	T-helper 1 type immune response				0.0128	1	0.0462	0.427	4	53	CCR2,IL33,ANXA1,TLR4
GO: Biological Process	GO:0007584	response to nutrient				0.013	1	0.0468	0.431	8	181	CYBB,HMOX1,NOD2,COL1A1,DPYD,FOLR2,LEP,POSTN
GO: Biological Process	GO:2001236	regulation of extrinsic apoptotic signaling pathway				0.013	1	0.0468	0.431	8	181	INHBA,HMOX1,PTPRC,SCG2,SRPX,LGALS3,IGF1,SERPINE1
GO: Biological Process	GO:0050690	regulation of defense response to virus by virus				0.0131	1	0.0471	0.435	3	29	DOCK2,CD28,HCK
GO: Biological Process	GO:0010884	positive regulation of lipid storage				0.0131	1	0.0471	0.435	3	29	C3,MSR1,CD36
GO: Biological Process	GO:0090280	positive regulation of calcium ion import				0.0131	1	0.0471	0.435	3	29	CCL2,LGALS3,SERPINE1
GO: Biological Process	GO:0007565	female pregnancy				0.0131	1	0.0472	0.435	9	218	PTGS2,ADCY7,MMP2,MMP9,MMP12,COL16A1,EPYC,LEP,THBD
GO: Biological Process	GO:0050688	regulation of defense response to virus				0.0133	1	0.0479	0.442	5	82	PTPN22,FGL2,MICB,CCL5,MMP12
GO: Biological Process	GO:0043536	positive regulation of blood vessel endothelial cell migration				0.0133	1	0.0479	0.442	5	82	HMOX1,PTGS2,SRPX2,ANXA1,IGF1
GO: Biological Process	GO:0071260	cellular response to mechanical stimulus				0.0133	1	0.0479	0.442	5	82	TLR7,COL1A1,CASP1,PIEZO2,TLR4
GO: Biological Process	GO:0006606	protein import into nucleus				0.0134	1	0.048	0.442	8	182	PTPN22,PTGS2,MMP12,MDFIC,LEP,CD36,IL6,HCLS1
GO: Biological Process	GO:0015718	monocarboxylic acid transport				0.0135	1	0.0483	0.446	9	219	CES1,SLCO2B1,ANXA1,SLC1A3,AQP9,LEP,SLC16A6,CD36,IL1RN
GO: Biological Process	GO:0090207	regulation of triglyceride metabolic process				0.0136	1	0.0489	0.451	4	54	PIK3CG,C3,APOE,CD36
GO: Biological Process	GO:0055023	positive regulation of cardiac muscle tissue growth				0.0136	1	0.0489	0.451	4	54	GATA6,CCN4,ZFPM2,IGF1
GO: Biological Process	GO:0048589	developmental growth				0.0137	1	0.049	0.452	23	816	EREG,GATA6,ITGA4,ZEB2,PLAC8,NRP2,CCN4,SASH3,AHR,FGF7,COL14A1,C3,CCL11,COMP,ANXA1,APOE,LEP,AREG,ZFPM2,POSTN,IGF1,SERPINE1,DUSP10
GO: Biological Process	GO:0006631	fatty acid metabolic process				0.0137	1	0.049	0.452	14	419	MYO5A,CES1,PTGS2,FABP4,TWIST1,C3,ALOX5,ALOX5AP,ANXA1,AOAH,APOC1,LEP,LIPA,CD36
GO: Biological Process	GO:0048705	skeletal system morphogenesis				0.0138	1	0.0494	0.456	10	258	ACP5,TWIST1,MMP2,FGR,COL1A1,PRRX1,COL11A1,SFRP4,COMP,GREM1
GO: Biological Process	GO:0007254	JNK cascade				0.0138	1	0.0495	0.456	9	220	RASSF2,PTPN22,NOD2,ADORA2B,FCGR2B,MDFIC,SFRP4,TLR4,DUSP10
GO: Biological Process	GO:0042698	ovulation cycle				0.014	1	0.05	0.461	5	83	EREG,INHBA,SERPINF1,ANXA1,LEP
GO: Cellular Component	GO:0030141	secretory granule				4.44e-29	2.1e-26	2.1e-26	1.42e-25	73	905	CYBB,ATP8B4,MYO5A,CLEC5A,CD300A,TCIRG1,NCF2,CHI3L1,PTAFR,CHIT1,ITGAM,HPSE,ITGAX,ADA2,ITGB2,PLAC8,FGL2,S100A8,S100A9,TYROBP,CFD,S100A12,PTPRC,FCER1G,FCGR2A,FCGR3B,FCN1,VNN1,SCG2,GM2A,PYGL,C3,C3AR1,PLAUR,BIN2,C5AR1,FGR,MMP9,MNDA,HSPA6,ALOX5,COL1A1,DOCK2,GLIPR1,SELL,FPR1,LAIR1,CPA3,PPBP,CR1,OLR1,SLC2A3,LGALS3,MMRN1,THBS2,RNASE2,IGF1,CD14,TIMP2,CD36,TLR2,SERPINE1,CD44,LAMP3,CD53,TNFAIP6,TNFRSF1B,CTSD…
GO: Cellular Component	GO:0009986	cell surface				6.52e-28	3.08e-25	1.54e-25	1.04e-24	77	1053	SLAMF8,CFH,HLA-DMA,CLEC5A,CLEC7A,DCSTAMP,ITGA4,ITGAM,ITGAX,ITGB2,CD163,NOD2,CCR2,ADORA2B,TYROBP,FAP,SRPX2,PTPRC,FCER1G,FCGR2B,FCN1,MICB,CXCL9,KCNMA1,C3,CCR1,PLAUR,CCR5,SRPX,C5AR1,CLEC2B,LILRB4,SELL,MRC1,SFRP4,NT5E,ANXA1,FOLR2,CCRL2,CPM,APOE,CR1,SLC1A3,AREG,LGALS3,MSR1,THBD,CD2,ABCG1,CD3G,CSF2RA,CD14,TIMP2,CD28,CD86,CD36,VCAN,TLR2,IGKC,TLR4,AOC3,CD44,CLEC2D,CD48,CD53,CD69,IGLC1,GREM1,OSMR,SLAMF7,T…
GO: Cellular Component	GO:0099503	secretory vesicle				6.12e-25	2.9e-22	9.65e-23	6.5e-22	75	1113	CYBB,ATP8B4,PDE4B,MYO5A,CLEC5A,CD300A,TCIRG1,NCF2,CHI3L1,PTAFR,CHIT1,ITGAM,HPSE,ITGAX,ADA2,ITGB2,PLAC8,FGL2,S100A8,S100A9,TYROBP,CFD,S100A12,PTPRC,FCER1G,FCGR2A,FCGR3B,FCN1,VNN1,SCG2,GM2A,PYGL,C3,C3AR1,PLAUR,BIN2,C5AR1,FGR,MMP9,MNDA,HSPA6,ALOX5,COL1A1,DOCK2,GLIPR1,SELL,FPR1,LAIR1,CPA3,PPBP,CR1,OLR1,SLC2A3,LGALS3,MMRN1,THBS2,RNASE2,IGF1,MCTP1,CD14,TIMP2,CD36,TLR2,SERPINE1,CD44,LAMP3,CD53,TNFAIP6,T…
GO: Cellular Component	GO:0097478	leaflet of membrane bilayer				2.76e-24	1.31e-21	2.61e-22	1.76e-21	59	704	CFH,HLA-DRB4,PTPN22,ITGA4,ITGAM,ITGAX,ITGB2,GEM,CD163,CCR2,PTPRC,FCER1G,FCGR2B,FCN1,MICB,CXCL9,KCNMA1,GM2A,CCR1,GNA15,CCR5,FGR,CLEC2B,LILRB4,SELL,NT5E,ANXA1,FOLR2,CCRL2,APOE,RGS1,LGALS3,MSR1,THBD,CD2,ABCG1,CD3G,CSF2RA,CD14,CD28,CD86,CD36,TLR2,IGKC,TLR4,CD44,CLEC2D,CD48,CD69,IGLC1,OSMR,SLAMF7,TRBC1,LY75,LYN,HCK,IL6,IL7R,CXCR2
GO: Cellular Component	GO:0098552	side of membrane				2.76e-24	1.31e-21	2.61e-22	1.76e-21	59	704	CFH,HLA-DRB4,PTPN22,ITGA4,ITGAM,ITGAX,ITGB2,GEM,CD163,CCR2,PTPRC,FCER1G,FCGR2B,FCN1,MICB,CXCL9,KCNMA1,GM2A,CCR1,GNA15,CCR5,FGR,CLEC2B,LILRB4,SELL,NT5E,ANXA1,FOLR2,CCRL2,APOE,RGS1,LGALS3,MSR1,THBD,CD2,ABCG1,CD3G,CSF2RA,CD14,CD28,CD86,CD36,TLR2,IGKC,TLR4,CD44,CLEC2D,CD48,CD69,IGLC1,OSMR,SLAMF7,TRBC1,LY75,LYN,HCK,IL6,IL7R,CXCR2
GO: Cellular Component	GO:0009897	external side of plasma membrane				6.04e-24	2.85e-21	4.76e-22	3.21e-21	49	480	CFH,ITGA4,ITGAM,ITGAX,ITGB2,CD163,CCR2,PTPRC,FCER1G,FCGR2B,FCN1,MICB,CXCL9,KCNMA1,CCR1,CCR5,CLEC2B,SELL,NT5E,ANXA1,FOLR2,CCRL2,APOE,LGALS3,MSR1,THBD,CD2,ABCG1,CD3G,CSF2RA,CD14,CD28,CD86,CD36,TLR2,IGKC,TLR4,CD44,CLEC2D,CD48,CD69,IGLC1,OSMR,SLAMF7,TRBC1,LY75,IL6,IL7R,CXCR2
GO: Cellular Component	GO:0031226	intrinsic component of plasma membrane				2.17e-22	1.03e-19	1.47e-20	9.87e-20	93	1818	CYBB,CD52,EREG,IGSF6,SLCO2B1,CLEC5A,TCIRG1,EVI2B,NCF2,NCF4,LY96,ITGA4,PTAFR,ADGRE2,ITGAM,ITGAX,ITGB2,ADCY7,CD163,NRP2,LAPTM5,NOD2,CD84,CCR2,ADORA2B,TYROBP,ADORA3,KCNE4,PTPRC,FCER1G,FCGR1B,FCGR2A,TRAT1,FCGR2B,FCGR3B,CLEC4A,RASGRP3,KCNMA1,HRH1,CCR1,C3AR1,PLAUR,CCR5,C5AR1,GPNMB,CLEC2B,STEAP1,LILRB4,SELE,SELL,MRC1,GPR18,GPR65,SLC31A2,FOLR2,CCRL2,GPR183,CR1,SLC1A3,OLR1,AQP9,MILR1,SLC2A3,MSR1,FCGR2C,TH…
GO: Cellular Component	GO:0031012	extracellular matrix	1	1		4.82e-21	2.28e-18	2.85e-19	1.92e-18	52	633	ASPN,SERPINF1,CHI3L1,HPSE,FGL2,S100A8,CCN4,S100A9,SRPX2,CLC,ADAMDEC1,FCN1,C1QA,C1QB,COL14A1,SRPX,MMP1,MMP2,MMP9,MMP12,COL1A1,COL1A2,COL5A1,COL8A1,COL8A2,COL10A1,COL11A1,COL15A1,COL16A1,COMP,EPYC,ANXA1,KERA,CPA3,APOE,OMD,OGN,LGALS3,MMRN1,POSTN,MFAP5,THBS2,IGF1,TIMP2,LOX,VCAN,SERPINE1,GREM1,LUM,CTSD,CTSS,CTSZ
GO: Cellular Component	GO:0030312	external encapsulating structure				5.56e-21	2.63e-18	2.92e-19	1.97e-18	52	635	ASPN,SERPINF1,CHI3L1,HPSE,FGL2,S100A8,CCN4,S100A9,SRPX2,CLC,ADAMDEC1,FCN1,C1QA,C1QB,COL14A1,SRPX,MMP1,MMP2,MMP9,MMP12,COL1A1,COL1A2,COL5A1,COL8A1,COL8A2,COL10A1,COL11A1,COL15A1,COL16A1,COMP,EPYC,ANXA1,KERA,CPA3,APOE,OMD,OGN,LGALS3,MMRN1,POSTN,MFAP5,THBS2,IGF1,TIMP2,LOX,VCAN,SERPINE1,GREM1,LUM,CTSD,CTSS,CTSZ
GO: Cellular Component	GO:0005887	integral component of plasma membrane				2.72e-20	1.29e-17	1.29e-18	8.67e-18	87	1735	CYBB,EREG,IGSF6,SLCO2B1,CLEC5A,TCIRG1,EVI2B,NCF2,NCF4,ITGA4,PTAFR,ADGRE2,ITGAM,ITGAX,ITGB2,ADCY7,CD163,NRP2,LAPTM5,CD84,CCR2,ADORA2B,TYROBP,ADORA3,KCNE4,PTPRC,FCER1G,FCGR1B,FCGR2A,TRAT1,FCGR2B,FCGR3B,CLEC4A,RASGRP3,KCNMA1,HRH1,CCR1,C3AR1,PLAUR,CCR5,C5AR1,GPNMB,CLEC2B,STEAP1,LILRB4,SELE,SELL,MRC1,GPR18,GPR65,SLC31A2,CCRL2,GPR183,CR1,SLC1A3,OLR1,AQP9,MILR1,SLC2A3,MSR1,FCGR2C,THBD,CD2,CD3G,CSF2RA,CS…
GO: Cellular Component	GO:0062023	collagen-containing extracellular matrix	1	1		6.59e-20	3.12e-17	2.83e-18	1.91e-17	45	498	ASPN,SERPINF1,FGL2,S100A8,S100A9,SRPX2,CLC,ADAMDEC1,FCN1,C1QA,C1QB,COL14A1,SRPX,MMP2,MMP9,COL1A1,COL1A2,COL5A1,COL8A1,COL8A2,COL10A1,COL11A1,COL15A1,COL16A1,COMP,ANXA1,CPA3,APOE,OMD,OGN,LGALS3,MMRN1,POSTN,MFAP5,THBS2,IGF1,TIMP2,LOX,VCAN,SERPINE1,GREM1,LUM,CTSD,CTSS,CTSZ
GO: Cellular Component	GO:0030667	secretory granule membrane				2.77e-18	1.31e-15	1.09e-16	7.37e-16	35	320	CYBB,ATP8B4,CLEC5A,CD300A,TCIRG1,PTAFR,ITGAM,ITGAX,ITGB2,TYROBP,PTPRC,FCER1G,FCGR2A,FCGR3B,VNN1,C3AR1,PLAUR,C5AR1,GLIPR1,SELL,FPR1,LAIR1,CR1,OLR1,SLC2A3,LGALS3,CD14,CD36,TLR2,CD44,LAMP3,CD53,TNFRSF1B,CXCR2,NCKAP1L
GO: Cellular Component	GO:0070820	tertiary granule				7.41e-18	3.5e-15	2.7e-16	1.82e-15	26	164	CYBB,ATP8B4,CLEC5A,CD300A,TCIRG1,PTAFR,CHIT1,ITGAM,ITGAX,ITGB2,FCER1G,MMP9,FPR1,LAIR1,PPBP,CR1,OLR1,SLC2A3,LGALS3,TIMP2,CD53,TNFAIP6,CTSD,LYZ,CTSS,NCKAP1L
GO: Cellular Component	GO:0030659	cytoplasmic vesicle membrane				1.65e-15	7.79e-13	5.57e-14	3.75e-13	51	822	CYBB,EREG,ATP8B4,CLEC5A,CD300A,HLA-DRB4,TCIRG1,PTAFR,ITGAM,ITGAX,ITGB2,CD163,TYROBP,PTPRC,FCER1G,FCGR1B,FCGR2A,FCGR3B,VNN1,C3AR1,PLAUR,C5AR1,GPNMB,MARCHF1,RAC2,GLIPR1,SELL,GPR18,ANXA1,FPR1,LAIR1,APOE,CR1,OLR1,SLC2A3,AREG,LGALS3,MSR1,CD3G,MCTP1,CD14,CD36,TLR1,TLR2,CD44,LAMP3,CD53,TNFRSF1B,IL7R,CXCR2,NCKAP1L
GO: Cellular Component	GO:0012506	vesicle membrane				4.75e-15	2.25e-12	1.5e-13	1.01e-12	51	844	CYBB,EREG,ATP8B4,CLEC5A,CD300A,HLA-DRB4,TCIRG1,PTAFR,ITGAM,ITGAX,ITGB2,CD163,TYROBP,PTPRC,FCER1G,FCGR1B,FCGR2A,FCGR3B,VNN1,C3AR1,PLAUR,C5AR1,GPNMB,MARCHF1,RAC2,GLIPR1,SELL,GPR18,ANXA1,FPR1,LAIR1,APOE,CR1,OLR1,SLC2A3,AREG,LGALS3,MSR1,CD3G,MCTP1,CD14,CD36,TLR1,TLR2,CD44,LAMP3,CD53,TNFRSF1B,IL7R,CXCR2,NCKAP1L
GO: Cellular Component	GO:0101002	ficolin-1-rich granule				1.49e-14	7.04e-12	4.4e-13	2.97e-12	24	185	CD300A,TCIRG1,ITGAX,ITGB2,FGL2,CFD,FCER1G,FCN1,PYGL,BIN2,MMP9,MNDA,HSPA6,ALOX5,FPR1,CR1,SLC2A3,LGALS3,TIMP2,TNFAIP6,CTSD,CTSS,CTSZ,NCKAP1L
GO: Cellular Component	GO:0005764	lysosome				3.92e-13	1.85e-10	1.03e-11	6.94e-11	44	726	CYBRD1,HLA-DMA,MYO5A,ACP5,HLA-DRB4,TCIRG1,NCF2,NCF4,TLR7,CHIT1,TM6SF1,HPSE,ADA2,PLAC8,LAPTM5,DNASE2B,VNN1,GM2A,C3,C3AR1,MARCHF1,MNDA,GLIPR1,ANXA1,FPR1,KERA,APOE,OMD,OGN,LIPA,RNASE2,SLC46A3,RNASE6,VCAN,GZMB,LAMP3,TRAF3IP3,LUM,CTSD,LYZ,HCK,CTSS,CTSZ,CXCR2
GO: Cellular Component	GO:0000323	lytic vacuole				3.92e-13	1.85e-10	1.03e-11	6.94e-11	44	726	CYBRD1,HLA-DMA,MYO5A,ACP5,HLA-DRB4,TCIRG1,NCF2,NCF4,TLR7,CHIT1,TM6SF1,HPSE,ADA2,PLAC8,LAPTM5,DNASE2B,VNN1,GM2A,C3,C3AR1,MARCHF1,MNDA,GLIPR1,ANXA1,FPR1,KERA,APOE,OMD,OGN,LIPA,RNASE2,SLC46A3,RNASE6,VCAN,GZMB,LAMP3,TRAF3IP3,LUM,CTSD,LYZ,HCK,CTSS,CTSZ,CXCR2
GO: Cellular Component	GO:0042581	specific granule				5.42e-13	2.57e-10	1.35e-11	9.1e-11	21	160	CYBB,ATP8B4,CLEC5A,CHI3L1,CHIT1,ITGAM,HPSE,ITGB2,C3AR1,PLAUR,DOCK2,LAIR1,OLR1,SLC2A3,TIMP2,CD36,CD53,TNFRSF1B,CTSD,LYZ,CTSZ
GO: Cellular Component	GO:0005581	collagen trimer				1.66e-12	7.84e-10	3.92e-11	2.64e-10	16	87	FCN1,C1QA,C1QB,COL14A1,COL1A1,COL1A2,COL5A1,COL8A1,COL8A2,COL10A1,COL11A1,COL15A1,COL16A1,MSR1,LOX,LUM
GO: Cellular Component	GO:0034774	secretory granule lumen				2.7e-12	1.28e-09	6.07e-11	4.09e-10	28	324	CHI3L1,CHIT1,HPSE,ADA2,PLAC8,S100A8,S100A9,CFD,S100A12,FCN1,GM2A,PYGL,C3,BIN2,FGR,MNDA,HSPA6,ALOX5,DOCK2,PPBP,MMRN1,RNASE2,IGF1,TIMP2,SERPINE1,CTSD,LYZ,CTSZ
GO: Cellular Component	GO:0060205	cytoplasmic vesicle lumen				3.63e-12	1.71e-09	7.79e-11	5.25e-10	28	328	CHI3L1,CHIT1,HPSE,ADA2,PLAC8,S100A8,S100A9,CFD,S100A12,FCN1,GM2A,PYGL,C3,BIN2,FGR,MNDA,HSPA6,ALOX5,DOCK2,PPBP,MMRN1,RNASE2,IGF1,TIMP2,SERPINE1,CTSD,LYZ,CTSZ
GO: Cellular Component	GO:0031983	vesicle lumen				4.2e-12	1.99e-09	8.63e-11	5.82e-10	28	330	CHI3L1,CHIT1,HPSE,ADA2,PLAC8,S100A8,S100A9,CFD,S100A12,FCN1,GM2A,PYGL,C3,BIN2,FGR,MNDA,HSPA6,ALOX5,DOCK2,PPBP,MMRN1,RNASE2,IGF1,TIMP2,SERPINE1,CTSD,LYZ,CTSZ
GO: Cellular Component	GO:0070821	tertiary granule membrane				3.19e-10	1.51e-07	6.28e-09	4.23e-08	13	73	CYBB,ATP8B4,CLEC5A,CD300A,PTAFR,ITGAM,ITGAX,ITGB2,FCER1G,LAIR1,OLR1,SLC2A3,CD53
GO: Cellular Component	GO:0045121	membrane raft				7.44e-10	3.52e-07	1.41e-08	9.48e-08	28	412	HMOX1,ITGAM,HPSE,ITGB2,PTGS2,MS4A4A,PTPRC,FCER1G,BTK,KCNMA1,SELE,LAT2,LCP2,CR1,OLR1,CD2,CD14,CD28,CD36,TLR1,TLR2,TLR4,TREM2,CD48,TNFRSF1B,LYN,CTSD,HCK
GO: Cellular Component	GO:0098857	membrane microdomain				7.86e-10	3.72e-07	1.43e-08	9.63e-08	28	413	HMOX1,ITGAM,HPSE,ITGB2,PTGS2,MS4A4A,PTPRC,FCER1G,BTK,KCNMA1,SELE,LAT2,LCP2,CR1,OLR1,CD2,CD14,CD28,CD36,TLR1,TLR2,TLR4,TREM2,CD48,TNFRSF1B,LYN,CTSD,HCK
GO: Cellular Component	GO:0035579	specific granule membrane				5.36e-09	2.53e-06	9.39e-08	6.32e-07	13	91	CYBB,ATP8B4,CLEC5A,ITGAM,ITGB2,C3AR1,PLAUR,LAIR1,OLR1,SLC2A3,CD36,CD53,TNFRSF1B
GO: Cellular Component	GO:0005583	fibrillar collagen trimer	1	1		2.11e-08	1e-05	3.45e-07	2.32e-06	6	12	COL1A1,COL1A2,COL5A1,COL11A1,COL16A1,LUM
GO: Cellular Component	GO:0098643	banded collagen fibril	1	1		2.11e-08	1e-05	3.45e-07	2.32e-06	6	12	COL1A1,COL1A2,COL5A1,COL11A1,COL16A1,LUM
GO: Cellular Component	GO:1904813	ficolin-1-rich granule lumen				3.06e-08	1.45e-05	4.82e-07	3.25e-06	14	124	FGL2,CFD,FCN1,PYGL,BIN2,MMP9,MNDA,HSPA6,ALOX5,TIMP2,TNFAIP6,CTSD,CTSS,CTSZ
GO: Cellular Component	GO:0098644	complex of collagen trimers				3.99e-08	1.89e-05	6.09e-07	4.1e-06	7	21	COL1A1,COL1A2,COL5A1,COL8A1,COL11A1,COL16A1,LUM
GO: Cellular Component	GO:0005775	vacuolar lumen				5.99e-08	2.83e-05	8.85e-07	5.96e-06	16	174	HPSE,ADA2,PLAC8,GM2A,C3,MNDA,KERA,OMD,OGN,LIPA,RNASE2,VCAN,LUM,CTSD,LYZ,CTSS
GO: Cellular Component	GO:0101003	ficolin-1-rich granule membrane				8.33e-08	3.94e-05	1.19e-06	8.05e-06	10	61	CD300A,TCIRG1,ITGAX,ITGB2,FCER1G,FPR1,CR1,SLC2A3,LGALS3,NCKAP1L
GO: Cellular Component	GO:0043235	receptor complex				4.96e-07	0.000235	6.9e-06	4.65e-05	28	559	TLR7,LY96,ITGA4,ITGAM,ITGAX,ITGB2,NRP2,TRAT1,AHR,COL10A1,PLXDC1,LCP2,OLR1,CD3G,CSF2RA,CSF2RB,CD14,PLXNC1,CD36,TLR1,TLR2,TLR4,CD44,OSMR,TNFRSF1B,TRBC1,LYN,IL6
GO: Cellular Component	GO:0005788	endoplasmic reticulum lumen				9.25e-07	0.000438	1.25e-05	8.43e-05	20	323	CES1,MGAT4A,PTGS2,SCG2,COL14A1,C3,PLAUR,COL1A1,COL1A2,COL5A1,COL8A1,COL8A2,COL10A1,COL11A1,COL15A1,COL16A1,APOE,VCAN,IL6,CTSZ
GO: Cellular Component	GO:1904724	tertiary granule lumen				4.29e-06	0.00203	5.64e-05	0.00038	8	55	CHIT1,MMP9,PPBP,TIMP2,TNFAIP6,CTSD,LYZ,CTSS
GO: Cellular Component	GO:0044853	plasma membrane raft				5.29e-06	0.0025	6.76e-05	0.000456	12	139	HMOX1,ITGAM,ITGB2,PTGS2,MS4A4A,KCNMA1,SELE,LCP2,CR1,CD36,TREM2,HCK
GO: Cellular Component	GO:0043202	lysosomal lumen				6.12e-06	0.00289	7.61e-05	0.000513	10	96	HPSE,GM2A,KERA,OMD,OGN,LIPA,VCAN,LUM,CTSD,CTSS
GO: Cellular Component	GO:0035580	specific granule lumen				1.07e-05	0.00507	0.00013	0.000877	8	62	CHI3L1,CHIT1,HPSE,DOCK2,TIMP2,CTSD,LYZ,CTSZ
GO: Cellular Component	GO:0098636	protein complex involved in cell adhesion				4.33e-05	0.0205	0.000512	0.00345	6	38	ITGA4,ITGAM,ITGAX,ITGB2,CD28,LYN
GO: Cellular Component	GO:0046696	lipopolysaccharide receptor complex		1		4.93e-05	0.0233	0.000569	0.00383	3	5	LY96,CD14,TLR4
GO: Cellular Component	GO:0072562	blood microparticle				5.27e-05	0.0249	0.000594	0.004	11	148	CFH,ACTG2,C1QB,C1R,C1S,C3,HSPA6,APOE,JCHAIN,IGKC,IGLC1
GO: Cellular Component	GO:0045335	phagocytic vesicle				5.96e-05	0.0282	0.000656	0.00442	11	150	CYBB,TCIRG1,NCF2,NCF4,TLR7,NOD2,RAC2,CD36,TLR1,TLR2,CTSS
GO: Cellular Component	GO:0030139	endocytic vesicle				7.72e-05	0.0365	0.00083	0.00559	17	335	CYBB,HLA-DRB4,TCIRG1,NCF2,NCF4,TLR7,CD163,NOD2,FCGR1B,CCL2,RAC2,APOE,MSR1,CD36,TLR1,TLR2,CTSS
GO: Cellular Component	GO:0005766	primary lysosome				9.53e-05	0.0451	0.00098	0.0066	11	158	ADA2,PLAC8,VNN1,GM2A,C3,C3AR1,MNDA,GLIPR1,FPR1,RNASE2,LYZ
GO: Cellular Component	GO:0042582	azurophil granule				9.53e-05	0.0451	0.00098	0.0066	11	158	ADA2,PLAC8,VNN1,GM2A,C3,C3AR1,MNDA,GLIPR1,FPR1,RNASE2,LYZ
GO: Cellular Component	GO:0001772	immunological synapse				0.000115	0.0546	0.00116	0.00782	6	45	LGALS3,CD28,GZMA,GZMB,CRTAM,CD53
GO: Cellular Component	GO:0031225	anchored component of membrane				0.000118	0.0557	0.00116	0.00782	12	190	CD52,NOD2,FCGR3B,VNN1,DPEP2,PLAUR,NT5E,FOLR2,CPM,CD2,CD14,CD48
GO: Cellular Component	GO:0030666	endocytic vesicle membrane				0.000173	0.0818	0.00167	0.0113	11	169	CYBB,HLA-DRB4,TCIRG1,CD163,FCGR1B,RAC2,APOE,MSR1,CD36,TLR1,TLR2
GO: Cellular Component	GO:0008305	integrin complex				0.000235	0.111	0.00222	0.015	5	33	ITGA4,ITGAM,ITGAX,ITGB2,LYN
GO: Cellular Component	GO:0009898	cytoplasmic side of plasma membrane				0.000285	0.135	0.0025	0.0168	11	179	PTPN22,GEM,PTPRC,GM2A,GNA15,FGR,LILRB4,RGS1,CD2,LYN,HCK
GO: Cellular Component	GO:0005602	complement component C1 complex				0.000301	0.142	0.0025	0.0168	2	2	C1QA,C1QB
GO: Cellular Component	GO:0005584	collagen type I trimer				0.000301	0.142	0.0025	0.0168	2	2	COL1A1,COL1A2
GO: Cellular Component	GO:0062167	complement component C1q complex				0.000301	0.142	0.0025	0.0168	2	2	C1QA,C1QB
GO: Cellular Component	GO:0034688	integrin alphaM-beta2 complex				0.000301	0.142	0.0025	0.0168	2	2	ITGAM,ITGB2
GO: Cellular Component	GO:0034689	integrin alphaX-beta2 complex				0.000301	0.142	0.0025	0.0168	2	2	ITGAX,ITGB2
GO: Cellular Component	GO:0035354	Toll-like receptor 1-Toll-like receptor 2 protein complex				0.000301	0.142	0.0025	0.0168	2	2	TLR1,TLR2
GO: Cellular Component	GO:0005765	lysosomal membrane				0.000377	0.178	0.00302	0.0203	17	383	CYBRD1,HLA-DMA,HLA-DRB4,TCIRG1,TLR7,TM6SF1,HPSE,LAPTM5,VNN1,C3AR1,MARCHF1,GLIPR1,FPR1,SLC46A3,LAMP3,TRAF3IP3,CTSD
GO: Cellular Component	GO:0098852	lytic vacuole membrane				0.000377	0.178	0.00302	0.0203	17	383	CYBRD1,HLA-DMA,HLA-DRB4,TCIRG1,TLR7,TM6SF1,HPSE,LAPTM5,VNN1,C3AR1,MARCHF1,GLIPR1,FPR1,SLC46A3,LAMP3,TRAF3IP3,CTSD
GO: Cellular Component	GO:1990777	lipoprotein particle				0.000463	0.219	0.00359	0.0242	5	38	PLTP,PLA2G7,APOC1,APOE,MSR1
GO: Cellular Component	GO:0034358	plasma lipoprotein particle				0.000463	0.219	0.00359	0.0242	5	38	PLTP,PLA2G7,APOC1,APOE,MSR1
GO: Cellular Component	GO:0031232	extrinsic component of external side of plasma membrane				0.000555	0.263	0.00424	0.0285	3	10	FCN1,ANXA1,APOE
GO: Cellular Component	GO:0005774	vacuolar membrane				0.000619	0.293	0.00464	0.0313	18	437	CYBRD1,HLA-DMA,HLA-DRB4,TCIRG1,TLR7,TM6SF1,HPSE,LAPTM5,VNN1,C3AR1,MARCHF1,GLIPR1,FPR1,THBD,SLC46A3,LAMP3,TRAF3IP3,CTSD
GO: Cellular Component	GO:0032994	protein-lipid complex				0.000662	0.313	0.0049	0.033	5	41	PLTP,PLA2G7,APOC1,APOE,MSR1
GO: Cellular Component	GO:0098562	cytoplasmic side of membrane				0.00089	0.421	0.00647	0.0436	11	205	PTPN22,GEM,PTPRC,GM2A,GNA15,FGR,LILRB4,RGS1,CD2,LYN,HCK
GO: Cellular Component	GO:0035578	azurophil granule lumen				0.000992	0.469	0.007	0.0472	7	91	ADA2,PLAC8,GM2A,C3,MNDA,RNASE2,LYZ
GO: Cellular Component	GO:0043020	NADPH oxidase complex				0.000992	0.469	0.007	0.0472	3	12	CYBB,NCF2,NCF4
GO: Cellular Component	GO:0031091	platelet alpha granule				0.00106	0.5	0.00736	0.0496	7	92	CFD,PPBP,MMRN1,THBS2,IGF1,CD36,SERPINE1
GO: Cellular Component	GO:0098797	plasma membrane protein complex				0.00119	0.564	0.00818	0.0551	25	744	CYBB,PDE4B,HLA-DMA,HLA-DRB4,NCF2,NCF4,ITGA4,ITGAM,ITGAX,ITGB2,KCNE4,FCER1G,TRAT1,KCNMA1,GNA15,LCP2,CD3G,IGF1,CSF2RB,TLR1,TLR2,OSMR,TRBC1,LYN,IL6
GO: Cellular Component	GO:0001891	phagocytic cup				0.00146	0.691	0.00973	0.0655	4	29	BIN2,ANXA1,LCP1,TLR4
GO: Cellular Component	GO:0034364	high-density lipoprotein particle				0.00146	0.691	0.00973	0.0655	4	29	PLTP,PLA2G7,APOC1,APOE
GO: Cellular Component	GO:0005588	collagen type V trimer				0.00173	0.82	0.0114	0.0767	2	4	COL5A1,COL16A1
GO: Cellular Component	GO:0034362	low-density lipoprotein particle				0.00198	0.934	0.0128	0.0862	3	15	PLA2G7,APOE,MSR1
GO: Cellular Component	GO:0098802	plasma membrane signaling receptor complex				0.00201	0.952	0.0129	0.0866	14	333	ITGA4,ITGAM,ITGAX,ITGB2,TRAT1,LCP2,CD3G,CSF2RB,TLR1,TLR2,OSMR,TRBC1,LYN,IL6
GO: Cellular Component	GO:0005593	FACIT collagen trimer				0.00424	1	0.0264	0.178	2	6	COL14A1,COL16A1
GO: Cellular Component	GO:0042629	mast cell granule				0.00424	1	0.0264	0.178	2	6	ANXA1,CXCR2
GO: Cellular Component	GO:0030665	clathrin-coated vesicle membrane				0.00478	1	0.0294	0.198	7	120	EREG,HLA-DRB4,FCGR1B,APOE,AREG,CD3G,IL7R
GO: Cellular Component	GO:0005604	basement membrane				0.00523	1	0.0317	0.214	7	122	SERPINF1,COL5A1,COL8A1,COL8A2,COL15A1,THBS2,TIMP2
GO: Cellular Component	GO:0032010	phagolysosome				0.00586	1	0.0351	0.237	2	7	NCF2,NCF4
GO: Cellular Component	GO:0031093	platelet alpha granule lumen				0.00594	1	0.0351	0.237	5	67	CFD,PPBP,MMRN1,IGF1,SERPINE1
GO: Cellular Component	GO:0019897	extrinsic component of plasma membrane				0.00684	1	0.0399	0.269	9	195	FCN1,GNA15,FGR,ANXA1,APOE,RGS1,OLR1,LYN,HCK
GO: Cellular Component	GO:0046658	anchored component of plasma membrane				0.00757	1	0.0437	0.294	5	71	NOD2,FOLR2,CD2,CD14,CD48
GO: Cellular Component	GO:0005794	Golgi apparatus				0.00778	1	0.0443	0.299	43	1710	CYBB,ATP8B4,MYO5A,RASSF2,HLA-DRB4,MGAT4A,GBP2,TLR7,TRIM22,GASK1B,NOD2,MS4A4A,FCGR2A,FGF7,ST8SIA4,HS3ST2,MS4A6A,MARCHF1,COL1A1,LST1,KERA,APOE,OMD,OGN,NLRP3,AREG,POSTN,ABCG1,CD14,CD36,VCAN,ST6GALNAC5,TLR1,TLR2,TLR4,AOC3,CD44,DUSP10,TRAF3IP3,LUM,LYN,HCK,CTSZ
GO: Cellular Component	GO:0010008	endosome membrane				0.00815	1	0.0459	0.309	17	514	HLA-DMA,HLA-DRB4,TCIRG1,NCF4,TLR7,LY96,DCSTAMP,FCGR1B,GPNMB,MARCHF1,STEAP1,MRC1,ANXA1,CD14,TLR4,LAMP3,CTSD
Human Phenotype	HP:0011107	Recurrent aphthous stomatitis				1.98e-10	6.5e-07	6.5e-07	5.64e-06	13	50	CYBB,IL10,NCF2,NCF4,ADA2,ITK,NOD2,CCL2,CCR1,CCL11,NLRP3,TLR4,IL6
Human Phenotype	HP:0010987	Abnormal cellular immune system morphology				1.04e-09	3.41e-06	1.14e-06	9.85e-06	52	895	CYBB,IL10,CFH,CES1,ACP5,CLEC7A,TCIRG1,EVI2A,EVI2B,PTPN22,NCF2,NCF4,ADA2,ITGB2,ADCY7,ITK,NOD2,IFIH1,TYROBP,CFD,PTPRC,FCGR2A,FCGR2B,BTK,C1QA,C1QB,CCL2,C1S,C3,CCR1,C3AR1,CCL11,PLN,RAC2,COL1A1,PLA2G7,DPYD,MAP3K8,NABP1,APOE,LEP,NLRP3,ZFPM2,MSR1,LIPA,CD3G,CD28,IGKC,TLR4,TREM2,TNFRSF1B,IL7R
Human Phenotype	HP:0001881	Abnormal leukocyte morphology				1.04e-09	3.41e-06	1.14e-06	9.85e-06	52	895	CYBB,IL10,CFH,CES1,ACP5,CLEC7A,TCIRG1,EVI2A,EVI2B,PTPN22,NCF2,NCF4,ADA2,ITGB2,ADCY7,ITK,NOD2,IFIH1,TYROBP,CFD,PTPRC,FCGR2A,FCGR2B,BTK,C1QA,C1QB,CCL2,C1S,C3,CCR1,C3AR1,CCL11,PLN,RAC2,COL1A1,PLA2G7,DPYD,MAP3K8,NABP1,APOE,LEP,NLRP3,ZFPM2,MSR1,LIPA,CD3G,CD28,IGKC,TLR4,TREM2,TNFRSF1B,IL7R
Human Phenotype	HP:0000155	Oral ulcer				1.69e-09	5.56e-06	1.39e-06	1.21e-05	12	48	CYBB,IL10,NCF2,NCF4,ADA2,NOD2,PTPRC,CCL2,CCR1,CCL11,TLR4,IL7R
Human Phenotype	HP:0002733	Abnormality of the lymph nodes				8.28e-09	2.73e-05	5.01e-06	4.35e-05	26	284	CYBB,IL10,ACP5,TCIRG1,PTPN22,NCF2,NCF4,ADA2,ADCY7,ITK,NOD2,PTPRC,BTK,CCL2,CCR1,CCL11,IRF8,BIRC3,APOE,NLRP3,ZFPM2,CD28,TLR4,TNFRSF1B,IL6,IL7R
Human Phenotype	HP:0011122	Abnormality of skin physiology				9.14e-09	3.01e-05	5.01e-06	4.35e-05	34	464	CYBB,IL10,IL10RA,CLEC7A,PTPN22,NCF2,NCF4,ADA2,TWIST1,NOD2,IFIH1,PTPRC,BTK,CCL2,CCR1,CCL11,MMP1,COL1A1,PLA2G7,PAPSS2,NLRP3,ZFPM2,LIPA,CD3G,CD28,IGKC,TLR4,CSTA,OSMR,TNFRSF1B,LY75,LYZ,IL6,IL7R
Human Phenotype	HP:0001871	Abnormality of blood and blood-forming tissues				1.37e-08	4.51e-05	6.44e-06	5.59e-05	75	1722	CYBB,IL10,CFH,IL10RA,CES1,ACP5,GATA6,CLEC7A,ACTG2,TCIRG1,EVI2A,EVI2B,PTPN22,NCF2,NCF4,HMOX1,ADA2,ITGB2,ADCY7,ITK,NOD2,IFIH1,TYROBP,CFD,PTPRC,FCGR2A,FCGR2B,BTK,C1QA,GM2A,C1QB,C1R,CCL2,C1S,COL14A1,C3,CCR1,C3AR1,CCL11,MMP1,PLN,RAC2,COL1A1,COL1A2,PLA2G7,COL5A1,DPYD,MAP3K8,BIRC3,SAMHD1,NABP1,APOE,LEP,SLC2A3,NLRP3,ZFPM2,MSR1,MFAP5,THBD,LIPA,CD3G,CSF2RA,CD28,LOX,CD36,IGKC,TLR4,SERPINE1,TREM2,TNFRSF1B,FY…
Human Phenotype	HP:0002716	Lymphadenopathy				2.11e-08	6.94e-05	8.67e-06	7.52e-05	25	276	CYBB,IL10,ACP5,TCIRG1,PTPN22,NCF2,NCF4,ADA2,ADCY7,ITK,NOD2,PTPRC,CCL2,CCR1,CCL11,IRF8,BIRC3,APOE,NLRP3,ZFPM2,CD28,TLR4,TNFRSF1B,IL6,IL7R
Human Phenotype	HP:0004791	Esophageal ulceration				2.42e-08	7.96e-05	8.85e-06	7.68e-05	10	38	IL10,GATA6,ADA2,NOD2,CCL2,CCR1,CCL11,ZFPM2,MSR1,TLR4
Human Phenotype	HP:0011123	Inflammatory abnormality of the skin				3.38e-08	0.000111	1.11e-05	9.65e-05	31	416	CYBB,IL10,IL10RA,CLEC7A,PTPN22,NCF2,NCF4,ADA2,TWIST1,NOD2,IFIH1,PTPRC,BTK,CCL2,CCR1,CCL11,COL1A1,PLA2G7,PAPSS2,NLRP3,ZFPM2,CD3G,CD28,IGKC,TLR4,CSTA,TNFRSF1B,LY75,LYZ,IL6,IL7R
Human Phenotype	HP:0001047	Atopic dermatitis				4.47e-08	0.000147	1.34e-05	0.000116	11	51	CYBB,IL10,NCF2,NCF4,ADA2,NOD2,IFIH1,CCR1,CD28,TLR4,TNFRSF1B
Human Phenotype	HP:0002960	Autoimmunity				7.22e-08	0.000238	1.98e-05	0.000172	37	580	CYBB,IL10,CFH,ACP5,GATA6,CLEC7A,PTPN22,NCF2,NCF4,ITGAM,ADA2,ADCY7,ITK,NOD2,FCGR2A,FCGR2B,BTK,C1QA,C1QB,C1R,CCL2,C1S,CCR1,CCL11,MMP2,MAP3K8,APOE,ZFPM2,MSR1,CD3G,CD28,IGKC,TLR4,TREM2,TNFRSF1B,IL6,IL7R
Human Phenotype	HP:0000988	Skin rash				9.99e-08	0.000329	2.38e-05	0.000207	19	178	CYBB,IL10,CLEC7A,PTPN22,NCF2,NCF4,ADA2,NOD2,BTK,CCL2,CCR1,CCL11,NLRP3,ZFPM2,CD28,TLR4,TNFRSF1B,LYZ,IL6
Human Phenotype	HP:0010280	Stomatitis				1.01e-07	0.000334	2.38e-05	0.000207	14	95	CYBB,IL10,NCF2,NCF4,ADA2,ITK,NOD2,CCL2,CCR1,CCL11,NLRP3,TLR4,IL1RN,IL6
Human Phenotype	HP:0010978	Abnormality of immune system physiology				1.43e-07	0.000469	3.13e-05	0.000271	68	1554	CYBB,IL10,CFH,IL10RA,MYO5A,ACP5,GATA6,CLEC7A,ACTG2,TCIRG1,PTPN22,NCF2,NCF4,ITGAM,ADA2,ITGB2,ADCY7,ITK,TWIST1,NOD2,IFIH1,CFD,PTPRC,FCGR2A,FCGR2B,BTK,HRH1,C1QA,GM2A,C1QB,C1R,CCL2,C1S,C3,CCR1,C3AR1,CCL11,MMP1,MMP2,CCL18,ALOX5,RAC2,COL1A1,DOCK2,PLA2G7,COL5A1,COL8A2,MAP3K8,IRF8,BIRC3,APOE,PAPSS2,LEP,NLRP3,ZFPM2,MSR1,CD3G,CD28,IGKC,TLR4,TREM2,CSTA,TNFRSF1B,LY75,IL1RN,LYZ,IL6,IL7R
Human Phenotype	HP:0002715	Abnormality of the immune system				1.64e-07	0.00054	3.37e-05	0.000293	77	1886	CYBB,IL10,CFH,IL10RA,MYO5A,CES1,ACP5,GATA6,CLEC7A,ACTG2,TCIRG1,EVI2A,EVI2B,PTPN22,NCF2,NCF4,ITGAM,ADA2,ITGB2,ADCY7,ITK,TWIST1,NOD2,IFIH1,TYROBP,CFD,PTPRC,FCGR2A,FCGR2B,BTK,HRH1,C1QA,GM2A,C1QB,C1R,CCL2,C1S,C3,CCR1,C3AR1,CCL11,MMP1,MMP2,CCL18,PLN,ALOX5,RAC2,COL1A1,DOCK2,PLA2G7,COL5A1,DPYD,COL8A2,MAP3K8,IRF8,BIRC3,NABP1,APOE,PAPSS2,LEP,NLRP3,ZFPM2,MSR1,LIPA,CD3G,CD28,TLR2,IGKC,TLR4,TREM2,CSTA,TNFRSF…
Human Phenotype	HP:0100279	Ulcerative colitis				1.83e-07	0.000603	3.39e-05	0.000294	11	58	CYBB,IL10,PTPN22,NCF2,NCF4,ADA2,NOD2,FCGR2A,CCR1,TLR4,IL6
Human Phenotype	HP:0003346	Abnormal immunological laboratory finding				1.85e-07	0.00061	3.39e-05	0.000294	26	330	CYBB,IL10,CFH,CLEC7A,TCIRG1,PTPN22,NCF2,NCF4,ADA2,ADCY7,ITK,NOD2,IFIH1,FCGR2A,FCGR2B,BTK,CCL2,CCR1,CCL11,MMP2,COL1A1,PLA2G7,CD28,IGKC,TLR4,TNFRSF1B
Human Phenotype	HP:0001369	Arthritis				2.25e-07	0.00074	3.85e-05	0.000334	27	356	CYBB,IL10,CES1,ASPN,ACP5,PTPN22,NCF2,NCF4,ADA2,ADCY7,NOD2,FCGR2A,FCGR2B,BTK,CCL2,CCR1,CCL11,COL1A1,COL1A2,COL5A1,COL11A1,COMP,APOE,NLRP3,ZFPM2,TLR4,IL6
Human Phenotype	HP:0012649	Increased inflammatory response				2.48e-07	0.000816	3.85e-05	0.000334	57	1202	CYBB,IL10,CFH,IL10RA,ACP5,GATA6,CLEC7A,ACTG2,TCIRG1,PTPN22,NCF2,NCF4,ADA2,ITGB2,ADCY7,ITK,TWIST1,NOD2,IFIH1,PTPRC,FCGR2A,FCGR2B,BTK,C1QA,C1QB,C1R,CCL2,C1S,C3,CCR1,CCL11,MMP1,CCL18,COL1A1,PLA2G7,COL5A1,COL8A2,MAP3K8,BIRC3,APOE,PAPSS2,LEP,NLRP3,ZFPM2,MSR1,CD3G,CD28,IGKC,TLR4,TREM2,CSTA,TNFRSF1B,LY75,IL1RN,LYZ,IL6,IL7R
Human Phenotype	HP:0012647	Abnormal inflammatory response				2.48e-07	0.000816	3.85e-05	0.000334	57	1202	CYBB,IL10,CFH,IL10RA,ACP5,GATA6,CLEC7A,ACTG2,TCIRG1,PTPN22,NCF2,NCF4,ADA2,ITGB2,ADCY7,ITK,TWIST1,NOD2,IFIH1,PTPRC,FCGR2A,FCGR2B,BTK,C1QA,C1QB,C1R,CCL2,C1S,C3,CCR1,CCL11,MMP1,CCL18,COL1A1,PLA2G7,COL5A1,COL8A2,MAP3K8,BIRC3,APOE,PAPSS2,LEP,NLRP3,ZFPM2,MSR1,CD3G,CD28,IGKC,TLR4,TREM2,CSTA,TNFRSF1B,LY75,IL1RN,LYZ,IL6,IL7R
Human Phenotype	HP:0001701	Pericarditis				2.58e-07	0.000848	3.85e-05	0.000334	12	73	IL10,PTPN22,ADA2,NOD2,FCGR2A,FCGR2B,CCL2,CCR1,CCL11,ZFPM2,TLR4,IL6
Human Phenotype	HP:0004332	Abnormal lymphocyte morphology				3.24e-07	0.00107	4.53e-05	0.000393	35	561	CYBB,IL10,CFH,ACP5,CLEC7A,TCIRG1,PTPN22,NCF2,NCF4,ADA2,ADCY7,ITK,IFIH1,CFD,PTPRC,FCGR2A,BTK,C1QA,C1QB,CCL2,C1S,C3,C3AR1,CCL11,COL1A1,PLA2G7,APOE,LEP,ZFPM2,LIPA,CD3G,CD28,IGKC,TNFRSF1B,IL7R
Human Phenotype	HP:0001045	Vitiligo				3.31e-07	0.00109	4.53e-05	0.000393	10	49	IL10,ACP5,CLEC7A,PTPN22,ADA2,NOD2,CCR1,CD28,TLR4,TNFRSF1B
Human Phenotype	HP:0200034	Papule				5.13e-07	0.00169	6.75e-05	0.000585	18	178	IL10,CLEC7A,EVI2A,EVI2B,PTPN22,ADA2,NOD2,CCR1,MMP2,COL1A1,COL5A1,APOE,NLRP3,LIPA,CD28,TLR4,CSTA,TNFRSF1B
Human Phenotype	HP:0011830	Abnormal oral mucosa morphology				6.17e-07	0.00203	7.8e-05	0.000677	24	305	CYBB,IL10,PTPN22,NCF2,NCF4,ADA2,ITGB2,ITK,NOD2,PTPRC,FCGR2A,C1R,CCL2,C1S,CCR1,CCL11,MMP2,COL5A1,APOE,NLRP3,TLR4,IL1RN,IL6,IL7R
Human Phenotype	HP:0012144	Abnormal monocyte morphology				6.4e-07	0.00211	7.8e-05	0.000677	13	94	CYBB,IL10,TCIRG1,PTPN22,NCF2,NCF4,ADA2,NOD2,CCR1,APOE,ZFPM2,LIPA,TLR4
Human Phenotype	HP:0045073	Serositis				7.77e-07	0.00256	9.12e-05	0.000792	18	183	CYBB,IL10,GATA6,PTPN22,NCF2,NCF4,ADA2,NOD2,FCGR2A,FCGR2B,CCL2,CCR1,CCL11,COL1A1,COL5A1,ZFPM2,TLR4,IL6
Human Phenotype	HP:0003613	Antiphospholipid antibody positivity				8.52e-07	0.0028	9.67e-05	0.000839	9	42	IL10,CFH,PTPN22,ADA2,NOD2,FCGR2A,FCGR2B,CCR1,TLR4
Human Phenotype	HP:0001697	Abnormal pericardium morphology				9.18e-07	0.00302	0.000101	0.000873	14	113	IL10,GATA6,PTPN22,ADA2,NOD2,FCGR2A,FCGR2B,CCL2,CCR1,CCL11,APOE,ZFPM2,TLR4,IL6
Human Phenotype	HP:0000964	Eczema				1.09e-06	0.00357	0.000115	0.000999	19	207	CYBB,IL10,CLEC7A,NCF2,NCF4,ADA2,NOD2,IFIH1,PTPRC,CCL2,CCR1,CCL11,PLA2G7,CD3G,CD28,TLR4,CSTA,TNFRSF1B,IL7R
Human Phenotype	HP:0002846	Abnormal B cell morphology				1.35e-06	0.00442	0.000138	0.0012	27	389	CYBB,IL10,CFH,CLEC7A,TCIRG1,NCF2,NCF4,ADA2,ADCY7,ITK,IFIH1,CFD,FCGR2A,BTK,C1QA,C1QB,CCL2,C1S,C3,C3AR1,CCL11,COL1A1,PLA2G7,CD28,IGKC,TNFRSF1B,IL7R
Human Phenotype	HP:0004311	Abnormal macrophage morphology				1.42e-06	0.00466	0.000141	0.00123	12	85	CYBB,IL10,PTPN22,NCF2,NCF4,ADA2,NOD2,CCR1,APOE,ZFPM2,LIPA,TLR4
Human Phenotype	HP:0001872	Abnormal thrombocyte morphology				1.59e-06	0.00523	0.000153	0.00133	38	682	CYBB,IL10,CFH,ACP5,ACTG2,TCIRG1,PTPN22,NCF2,NCF4,ADA2,ADCY7,ITK,NOD2,IFIH1,FCGR2A,FCGR2B,BTK,CCL2,C3,CCR1,C3AR1,CCL11,COL1A1,DPYD,MAP3K8,SAMHD1,APOE,NLRP3,ZFPM2,MSR1,THBD,CD28,CD36,TLR4,TNFRSF1B,FYB1,IL6,IL7R
Human Phenotype	HP:0001933	Subcutaneous hemorrhage				1.65e-06	0.00542	0.000153	0.00133	23	299	IL10,CFH,ACP5,TCIRG1,PTPN22,ADA2,ADCY7,FCGR2A,C1R,CCL2,C1S,C3AR1,CCL11,COL1A1,COL1A2,COL5A1,APOE,NLRP3,MFAP5,CD28,LOX,TNFRSF1B,IL6
Human Phenotype	HP:0004953	Dilatation of abdominal aorta				1.67e-06	0.0055	0.000153	0.00133	8	34	IL10,PTPN22,ADA2,NOD2,CCR1,MFAP5,LOX,TLR4
Human Phenotype	HP:0200042	Skin ulcer				1.74e-06	0.00571	0.000154	0.00134	14	119	CYBB,IL10,CLEC7A,PTPN22,NCF2,NCF4,ADA2,NOD2,BTK,CCR1,COL1A1,CD28,TLR4,TNFRSF1B
Human Phenotype	HP:0011893	Abnormal leukocyte count				1.79e-06	0.00588	0.000155	0.00134	33	548	CYBB,IL10,ACP5,TCIRG1,PTPN22,NCF2,NCF4,ADA2,ITGB2,ADCY7,ITK,NOD2,PTPRC,FCGR2A,FCGR2B,BTK,CCL2,CCR1,CCL11,RAC2,DPYD,MAP3K8,APOE,LEP,NLRP3,ZFPM2,MSR1,CD3G,CD28,IGKC,TLR4,TNFRSF1B,IL7R
Human Phenotype	HP:0002955	Granulomatosis				2.38e-06	0.00784	0.000201	0.00175	10	60	CYBB,IL10,PTPN22,NCF2,NCF4,ADA2,NOD2,CCR1,ZFPM2,TLR4
Human Phenotype	HP:0001974	Leukocytosis				2.56e-06	0.00842	0.000211	0.00183	22	284	CYBB,IL10,TCIRG1,PTPN22,NCF2,NCF4,ADA2,ITGB2,ADCY7,NOD2,FCGR2A,CCL2,CCR1,CCL11,RAC2,APOE,NLRP3,ZFPM2,CD28,TLR4,TNFRSF1B,IL7R
Human Phenotype	HP:0002102	Pleuritis				2.98e-06	0.0098	0.000239	0.00207	12	91	IL10,GATA6,PTPN22,ADA2,NOD2,FCGR2A,FCGR2B,CCL2,CCR1,CCL11,ZFPM2,TLR4
Human Phenotype	HP:0005368	Abnormality of humoral immunity				3.36e-06	0.011	0.000263	0.00228	26	383	CYBB,IL10,CFH,CLEC7A,TCIRG1,NCF2,NCF4,ADA2,ADCY7,ITK,IFIH1,CFD,FCGR2A,BTK,C1QA,C1QB,CCL2,C1S,C3,C3AR1,CCL11,COL1A1,PLA2G7,CD28,IGKC,TNFRSF1B
Human Phenotype	HP:0002476	Primitive reflex				3.82e-06	0.0126	0.000292	0.00254	7	27	IL10,TYROBP,GM2A,CCL2,CCL11,PIEZO2,TREM2
Human Phenotype	HP:0010783	Erythema				4.09e-06	0.0135	0.000306	0.00265	18	205	CYBB,IL10,CLEC7A,NCF2,NCF4,ADGRE2,ADA2,NOD2,CCL2,CCR1,CCL11,COL1A1,NLRP3,ZFPM2,CD28,TLR4,CSTA,TNFRSF1B
Human Phenotype	HP:0002719	Recurrent infections				4.75e-06	0.0156	0.000347	0.00301	42	830	CYBB,IL10,CFH,IL10RA,MYO5A,ACP5,GATA6,CLEC7A,TCIRG1,PTPN22,NCF2,NCF4,ITGB2,ADCY7,ITK,IFIH1,CFD,PTPRC,FCGR2A,BTK,C1QA,GM2A,C1QB,C1R,CCL2,C1S,C3,CCL11,CCL18,COL1A1,COL5A1,IRF8,BIRC3,APOE,LEP,ZFPM2,MSR1,CD3G,CD28,IGKC,TNFRSF1B,IL7R
Human Phenotype	HP:0000999	Pyoderma				5.52e-06	0.0182	0.000371	0.00322	6	19	CYBB,IL10RA,PTPN22,NCF2,NCF4,BTK
Human Phenotype	HP:0007813	Nongranulomatous uveitis				5.52e-06	0.0182	0.000371	0.00322	6	19	IL10,PTPN22,ADA2,NOD2,CCR1,TLR4
Human Phenotype	HP:0001058	Poor wound healing				5.52e-06	0.0182	0.000371	0.00322	6	19	C1R,C1S,RAC2,COL1A1,COL1A2,COL5A1
Human Phenotype	HP:0100654	Retrobulbar optic neuritis				5.52e-06	0.0182	0.000371	0.00322	6	19	IL10,ADA2,NOD2,CCR1,NLRP3,TLR4
Human Phenotype	HP:0100758	Gangrene				7.55e-06	0.0248	0.000497	0.00431	8	41	IL10,PTPN22,ADA2,NOD2,CCR1,CD28,TLR4,TNFRSF1B
Human Phenotype	HP:0001025	Urticaria				8.45e-06	0.0278	0.000545	0.00473	11	84	IL10,ADGRE2,ADA2,NOD2,CCL2,CCR1,CCL11,NLRP3,CD28,TLR4,TNFRSF1B
Human Phenotype	HP:0011873	Abnormal platelet count				9.04e-06	0.0298	0.000572	0.00496	32	562	CYBB,IL10,CFH,ACP5,TCIRG1,PTPN22,NCF2,NCF4,ADA2,ADCY7,ITK,IFIH1,FCGR2A,FCGR2B,BTK,CCL2,C3,C3AR1,CCL11,COL1A1,DPYD,MAP3K8,SAMHD1,APOE,ZFPM2,MSR1,THBD,CD28,CD36,TNFRSF1B,FYB1,IL7R
Human Phenotype	HP:0004386	Gastrointestinal inflammation				9.23e-06	0.0304	0.000573	0.00497	20	261	CYBB,IL10,IL10RA,GATA6,CLEC7A,PTPN22,NCF2,NCF4,ADA2,ADCY7,NOD2,FCGR2A,CCL2,CCR1,CCL11,APOE,ZFPM2,MSR1,TLR4,IL6
Human Phenotype	HP:0003565	Elevated erythrocyte sedimentation rate				1.01e-05	0.0332	0.000602	0.00522	10	70	IL10,PTPN22,ADA2,ITK,NOD2,CCR1,NLRP3,ZFPM2,TLR4,IL6
Human Phenotype	HP:0025021	Abnormal erythrocyte sedimentation rate				1.01e-05	0.0332	0.000602	0.00522	10	70	IL10,PTPN22,ADA2,ITK,NOD2,CCR1,NLRP3,ZFPM2,TLR4,IL6
Human Phenotype	HP:0002037	Inflammation of the large intestine				1.05e-05	0.0347	0.000602	0.00522	17	198	CYBB,IL10,IL10RA,PTPN22,NCF2,NCF4,ADA2,ADCY7,NOD2,FCGR2A,CCL2,CCR1,CCL11,APOE,ZFPM2,TLR4,IL6
Human Phenotype	HP:0001287	Meningitis				1.06e-05	0.0347	0.000602	0.00522	19	241	CYBB,IL10,PTPN22,NCF2,NCF4,ADA2,NOD2,BTK,CCL2,CCR1,CCL11,NLRP3,ZFPM2,CD28,IGKC,TLR4,TREM2,TNFRSF1B,IL6
Human Phenotype	HP:0001873	Thrombocytopenia				1.06e-05	0.0349	0.000602	0.00522	30	512	CYBB,IL10,CFH,ACP5,TCIRG1,PTPN22,NCF2,NCF4,ADCY7,ITK,IFIH1,FCGR2A,FCGR2B,BTK,CCL2,C3,C3AR1,CCL11,DPYD,MAP3K8,SAMHD1,APOE,ZFPM2,MSR1,THBD,CD28,CD36,TNFRSF1B,FYB1,IL7R
Human Phenotype	HP:0001945	Fever				1.09e-05	0.0358	0.000602	0.00522	29	486	CYBB,IL10,CFH,PTPN22,NCF2,NCF4,ADA2,ADCY7,NOD2,FCGR2A,BTK,CCL2,CCR1,C3AR1,CCL11,COL1A1,MAP3K8,IRF8,BIRC3,APOE,NLRP3,ZFPM2,MSR1,LIPA,CD28,TLR4,TNFRSF1B,IL6,IL7R
Human Phenotype	HP:0005112	Abdominal aortic aneurysm				1.1e-05	0.0361	0.000602	0.00522	8	43	IL10,PTPN22,ADA2,NOD2,CCR1,MFAP5,LOX,TLR4
Human Phenotype	HP:0000591	Abnormal sclera morphology				1.26e-05	0.0416	0.000681	0.00591	13	122	IL10,SERPINF1,PTPN22,ADA2,NOD2,C1R,C1S,CCR1,COL1A1,COL1A2,COL5A1,NLRP3,TLR4
Human Phenotype	HP:0004370	Abnormality of temperature regulation				1.31e-05	0.0432	0.000696	0.00604	32	572	CYBB,IL10,CFH,GATA6,CLEC7A,TCIRG1,PTPN22,NCF2,NCF4,ADA2,ADCY7,NOD2,FCGR2A,BTK,CCL2,CCR1,C3AR1,CCL11,COL1A1,MAP3K8,IRF8,BIRC3,APOE,NLRP3,ZFPM2,MSR1,LIPA,CD28,TLR4,TNFRSF1B,IL6,IL7R
Human Phenotype	HP:0002014	Diarrhea				1.36e-05	0.0448	0.000711	0.00616	27	439	CYBB,IL10,CFH,IL10RA,GATA6,ACTG2,NCF2,NCF4,ADA2,ADCY7,NOD2,PTPRC,FCGR2A,BTK,CCL2,CCR1,C3AR1,CCL11,DPYD,MAP3K8,ZFPM2,MSR1,LIPA,IGKC,TLR4,IL6,IL7R
Human Phenotype	HP:0003493	Antinuclear antibody positivity				1.44e-05	0.0472	0.000737	0.0064	9	58	IL10,PTPN22,ADA2,NOD2,FCGR2A,FCGR2B,CCR1,MMP2,TLR4
Human Phenotype	HP:0002718	Recurrent bacterial infections				1.51e-05	0.0495	0.000762	0.00661	19	247	CYBB,IL10,CFH,IL10RA,TCIRG1,PTPN22,NCF2,NCF4,ITGB2,ADCY7,CFD,PTPRC,BTK,CCL2,C3,CCL11,ZFPM2,IGKC,IL7R
Human Phenotype	HP:0003249	Genital ulcers				1.61e-05	0.0531	0.000793	0.00688	7	33	IL10,ADA2,NOD2,CCL2,CCR1,CCL11,TLR4
Human Phenotype	HP:0012122	Anterior uveitis				1.61e-05	0.0531	0.000793	0.00688	7	33	IL10,PTPN22,ADA2,NOD2,CCR1,TLR4,IL6
Human Phenotype	HP:0001917	Renal amyloidosis				1.89e-05	0.062	0.000879	0.00763	6	23	IL10,ADA2,NOD2,CCR1,NLRP3,TLR4
Human Phenotype	HP:0100721	Mediastinal lymphadenopathy				1.89e-05	0.0621	0.000879	0.00763	10	75	CYBB,IL10,PTPN22,NCF2,NCF4,CCL2,CCL11,BIRC3,APOE,ZFPM2
Human Phenotype	HP:0100722	Abnormality of the mediastinum				1.89e-05	0.0621	0.000879	0.00763	10	75	CYBB,IL10,PTPN22,NCF2,NCF4,CCL2,CCL11,BIRC3,APOE,ZFPM2
Human Phenotype	HP:0002113	Pulmonary infiltrates				1.92e-05	0.0632	0.000879	0.00763	16	186	CYBB,IL10,PTPN22,NCF2,NCF4,ADA2,NOD2,FCGR2A,CCL2,CCR1,CCL11,MAP3K8,BIRC3,APOE,ZFPM2,TLR4
Human Phenotype	HP:0011276	Vascular skin abnormality				1.92e-05	0.0633	0.000879	0.00763	34	639	CYBB,IL10,CFH,ACP5,CLEC7A,TCIRG1,PTPN22,NCF2,NCF4,ADGRE2,ADA2,ADCY7,NOD2,FCGR2A,C1R,CCL2,C1S,CCR1,C3AR1,CCL11,COL1A1,COL1A2,COL5A1,APOE,NLRP3,ZFPM2,MFAP5,CD28,LOX,IGKC,TLR4,CSTA,TNFRSF1B,IL6
Human Phenotype	HP:0001061	Acne				2.13e-05	0.0699	0.000958	0.00831	10	76	CYBB,IL10,NCF2,NCF4,ADA2,TWIST1,NOD2,CCR1,PAPSS2,TLR4
Human Phenotype	HP:0002829	Arthralgia				2.18e-05	0.0716	0.000967	0.00839	18	231	IL10,ASPN,PTPN22,ADA2,ADCY7,NOD2,TYROBP,C1S,CCR1,MMP2,COL11A1,SFRP4,COMP,NLRP3,TLR4,TREM2,IL1RN,IL6
Human Phenotype	HP:0002843	Abnormal T cell morphology				2.35e-05	0.0772	0.001	0.00867	16	189	IL10,ACP5,CLEC7A,ADCY7,PTPRC,FCGR2A,CCL2,CCL11,APOE,LEP,ZFPM2,CD3G,CD28,IGKC,TNFRSF1B,IL7R
Human Phenotype	HP:0004942	Aortic aneurysm				2.39e-05	0.0786	0.001	0.00867	10	77	IL10,PTPN22,ADA2,NOD2,CCR1,COL5A1,ZFPM2,MFAP5,LOX,TLR4
Human Phenotype	HP:0002043	Esophageal stricture				2.43e-05	0.0801	0.001	0.00867	7	35	CYBB,GATA6,NCF2,NCF4,MMP1,ZFPM2,MSR1
Human Phenotype	HP:0010450	Esophageal stenosis				2.43e-05	0.0801	0.001	0.00867	7	35	CYBB,GATA6,NCF2,NCF4,MMP1,ZFPM2,MSR1
Human Phenotype	HP:0100653	Optic neuritis				2.43e-05	0.0801	0.001	0.00867	7	35	IL10,PTPN22,ADA2,NOD2,CCR1,NLRP3,TLR4
Human Phenotype	HP:0011944	Small vessel vasculitis				2.46e-05	0.081	0.001	0.00867	6	24	IL10,PTPN22,ADA2,NOD2,CCR1,TLR4
Human Phenotype	HP:0004937	Pulmonary artery aneurysm				2.46e-05	0.081	0.001	0.00867	6	24	IL10,ADA2,NOD2,CCR1,COL5A1,TLR4
Human Phenotype	HP:0002583	Colitis				2.52e-05	0.083	0.001	0.00868	13	130	CYBB,IL10,PTPN22,NCF2,NCF4,ADA2,ADCY7,NOD2,FCGR2A,CCR1,ZFPM2,TLR4,IL6
Human Phenotype	HP:0100281	Chronic colitis				2.52e-05	0.083	0.001	0.00868	13	130	CYBB,IL10,PTPN22,NCF2,NCF4,ADA2,ADCY7,NOD2,FCGR2A,CCR1,ZFPM2,TLR4,IL6
Human Phenotype	HP:0002383	Encephalitis				2.74e-05	0.0902	0.00105	0.0091	13	131	CYBB,IL10,NCF2,NCF4,ADA2,NOD2,BTK,CCL2,CCR1,CCL11,ZFPM2,TLR4,TREM2
Human Phenotype	HP:0002382	Variable mental retardation				2.74e-05	0.0902	0.00105	0.0091	13	131	CYBB,IL10,NCF2,NCF4,ADA2,NOD2,BTK,CCL2,CCR1,CCL11,ZFPM2,TLR4,TREM2
Human Phenotype	HP:0000554	Uveitis				2.74e-05	0.0902	0.00105	0.0091	13	131	CYBB,IL10,PTPN22,NCF2,NCF4,ADA2,NOD2,CCR1,BIRC3,NLRP3,ZFPM2,TLR4,IL6
Human Phenotype	HP:0005224	Rectal abscess				2.78e-05	0.0913	0.00105	0.00911	4	8	CYBB,NCF2,NCF4,ITGB2
Human Phenotype	HP:0001892	Abnormal bleeding				2.83e-05	0.0932	0.00106	0.00919	33	622	IL10,CFH,IL10RA,ACP5,GATA6,TCIRG1,PTPN22,ADA2,ADCY7,NOD2,FCGR2A,C1R,CCL2,C1S,CCR1,C3AR1,CCL11,COL1A1,COL1A2,COL5A1,APOE,NLRP3,ZFPM2,MSR1,MFAP5,CD28,LOX,CD36,TLR4,SERPINE1,TNFRSF1B,FYB1,IL6
Human Phenotype	HP:0011450	Unusual CNS infection				2.95e-05	0.0972	0.00107	0.00932	19	259	CYBB,IL10,PTPN22,NCF2,NCF4,ADA2,NOD2,BTK,CCL2,CCR1,CCL11,NLRP3,ZFPM2,CD28,IGKC,TLR4,TREM2,TNFRSF1B,IL6
Human Phenotype	HP:0005681	Juvenile rheumatoid arthritis				2.96e-05	0.0973	0.00107	0.00932	7	36	IL10,PTPN22,ADA2,NOD2,CCR1,TLR4,IL6
Human Phenotype	HP:0045027	Abnormality of the thoracic cavity				3.01e-05	0.0989	0.00107	0.00932	10	79	CYBB,IL10,PTPN22,NCF2,NCF4,CCL2,CCL11,BIRC3,APOE,ZFPM2
Human Phenotype	HP:0045026	Abnormality of the mediastinum				3.01e-05	0.0989	0.00107	0.00932	10	79	CYBB,IL10,PTPN22,NCF2,NCF4,CCL2,CCL11,BIRC3,APOE,ZFPM2
Human Phenotype	HP:0002633	Vasculitis				3.12e-05	0.103	0.0011	0.00953	17	215	CYBB,IL10,PTPN22,NCF2,NCF4,ADA2,ADCY7,NOD2,IFIH1,CCL2,CCR1,CCL11,NLRP3,ZFPM2,CD28,TLR4,TNFRSF1B
Human Phenotype	HP:0005310	Large vessel vasculitis				3.17e-05	0.104	0.0011	0.00953	6	25	IL10,PTPN22,ADA2,NOD2,CCR1,TLR4
Human Phenotype	HP:0005318	Cerebral vasculitis				3.17e-05	0.104	0.0011	0.00953	6	25	IL10,PTPN22,ADA2,NOD2,CCR1,TLR4
Human Phenotype	HP:0005403	T lymphocytopenia				3.49e-05	0.115	0.0012	0.0104	8	50	IL10,ACP5,PTPRC,CCL2,CCL11,LEP,CD3G,IL7R
Human Phenotype	HP:0000230	Gingivitis				3.75e-05	0.123	0.00127	0.011	10	81	CYBB,IL10,PTPN22,NCF2,NCF4,ITGB2,CCL2,CCL11,COL5A1,APOE
Human Phenotype	HP:0005059	Arthralgia/arthritis				4.04e-05	0.133	0.00134	0.0116	6	26	IL10,PTPN22,ADA2,NOD2,CCR1,TLR4
Human Phenotype	HP:0200029	Vasculitis in the skin				4.04e-05	0.133	0.00134	0.0116	6	26	IL10,PTPN22,ADA2,NOD2,CCR1,TLR4
Human Phenotype	HP:0001482	Subcutaneous nodule				4.13e-05	0.136	0.00135	0.0117	11	99	IL10,EVI2A,EVI2B,ADA2,NOD2,CCR1,MMP2,COL1A1,COL5A1,APOE,TLR4
Human Phenotype	HP:0000614	Abnormal nasolacrimal system morphology				4.18e-05	0.138	0.00135	0.0117	10	82	IL10,PTPN22,ADA2,TWIST1,NOD2,CCR1,COL5A1,BIRC3,APOE,TLR4
Human Phenotype	HP:0011028	Abnormality of blood circulation				4.19e-05	0.138	0.00135	0.0117	31	577	IL10,CFH,IL10RA,ACP5,GATA6,TCIRG1,PTPN22,ADA2,ADCY7,NOD2,FCGR2A,C1R,CCL2,C1S,CCR1,C3AR1,CCL11,COL1A1,COL1A2,COL5A1,APOE,NLRP3,ZFPM2,MSR1,MFAP5,LIPA,CD28,LOX,TLR4,TNFRSF1B,IL6
Human Phenotype	HP:0002725	Systemic lupus erythematosus				4.78e-05	0.157	0.00153	0.0132	13	138	IL10,PTPN22,ITGAM,ADA2,NOD2,FCGR2A,FCGR2B,C1QA,C1QB,C1S,CCR1,ZFPM2,TLR4
Human Phenotype	HP:0008066	Abnormal blistering of the skin				4.85e-05	0.159	0.00153	0.0133	12	119	IL10,TCIRG1,ADA2,NOD2,CCL2,CCR1,CCL11,MMP1,CD28,TLR4,CSTA,TNFRSF1B
Human Phenotype	HP:0005356	Decreased serum complement factor I				4.9e-05	0.161	0.00153	0.0133	4	9	CFH,C1QA,C1QB,C3AR1
Human Phenotype	HP:0002229	Alopecia areata				5.08e-05	0.167	0.00157	0.0136	6	27	IL10,ADA2,NOD2,CCR1,APOE,TLR4
Human Phenotype	HP:0002958	Immune dysregulation				5.16e-05	0.17	0.00157	0.0136	10	84	IL10,ACP5,ADA2,ADCY7,NOD2,FCGR2A,CCL2,CCR1,CCL11,TLR4
Human Phenotype	HP:0100838	Recurrent cutaneous abscess formation				5.2e-05	0.171	0.00157	0.0136	5	17	CYBB,IL10RA,NCF2,NCF4,BTK
Human Phenotype	HP:0031292	Cutaneous abscess				5.2e-05	0.171	0.00157	0.0136	5	17	CYBB,IL10RA,NCF2,NCF4,BTK
Human Phenotype	HP:0001882	Leukopenia				5.31e-05	0.175	0.00159	0.0138	24	394	CYBB,IL10,ACP5,TCIRG1,PTPN22,NCF2,NCF4,ADA2,ADCY7,ITK,PTPRC,FCGR2A,FCGR2B,CCL2,CCL11,APOE,LEP,ZFPM2,MSR1,CD3G,CD28,IGKC,TNFRSF1B,IL7R
Human Phenotype	HP:0004431	Complement deficiency				6.01e-05	0.198	0.00178	0.0154	9	69	CYBB,CFH,NCF2,NCF4,CFD,C1QA,C1QB,C3,C3AR1
Human Phenotype	HP:0000979	Purpura				6.31e-05	0.207	0.00185	0.0161	14	162	IL10,CFH,ACP5,PTPN22,ADA2,ADCY7,FCGR2A,CCL2,C3AR1,CCL11,APOE,NLRP3,CD28,TNFRSF1B
Human Phenotype	HP:0001824	Weight loss				6.45e-05	0.212	0.00187	0.0162	25	425	CYBB,IL10,GATA6,PTPN22,NCF2,NCF4,ADA2,NOD2,FCGR2A,BTK,CCL2,CCR1,CCL11,MAP3K8,BIRC3,APOE,SLC2A3,ZFPM2,MSR1,LIPA,CD28,TLR4,TREM2,TNFRSF1B,IL6
Human Phenotype	HP:0003135	Abnormal hematological laboratory findings				6.48e-05	0.213	0.00187	0.0162	31	590	CYBB,IL10,CFH,ACP5,TCIRG1,PTPN22,NCF2,NCF4,ADCY7,ITK,IFIH1,FCGR2A,FCGR2B,BTK,CCL2,C3,C3AR1,CCL11,DPYD,MAP3K8,SAMHD1,APOE,ZFPM2,MSR1,THBD,LIPA,CD28,CD36,TNFRSF1B,FYB1,IL7R
Human Phenotype	HP:0002105	Hemoptysis				6.75e-05	0.222	0.00192	0.0167	14	163	IL10,GATA6,CLEC7A,PTPN22,ADA2,NOD2,FCGR2A,CCR1,COL5A1,MAP3K8,ZFPM2,MFAP5,LOX,TLR4
Human Phenotype	HP:0004377	Hematological neoplasm				6.77e-05	0.223	0.00192	0.0167	32	620	CYBB,IL10,CES1,TCIRG1,EVI2A,EVI2B,PTPN22,NCF2,NCF4,ADA2,ADCY7,ITK,NOD2,TYROBP,FCGR2A,CCL2,COL14A1,CCR1,CCL11,MAP3K8,BIRC3,NABP1,APOE,ZFPM2,MSR1,CD28,IGKC,TLR4,TREM2,TNFRSF1B,IL6,IL7R
Human Phenotype	HP:0012424	Chorioretinitis				7.04e-05	0.232	0.00198	0.0172	5	18	IL10,ADA2,NOD2,CCR1,TLR4
Human Phenotype	HP:0004927	Pulmonary artery dilatation				7.1e-05	0.234	0.00198	0.0172	8	55	IL10,GATA6,ADA2,NOD2,CCR1,COL5A1,ZFPM2,TLR4
Human Phenotype	HP:0001888	Lymphopenia				7.2e-05	0.237	0.00199	0.0173	21	325	CYBB,IL10,ACP5,TCIRG1,PTPN22,NCF2,NCF4,ADCY7,ITK,PTPRC,FCGR2A,CCL2,CCL11,APOE,LEP,ZFPM2,CD3G,CD28,IGKC,TNFRSF1B,IL7R
Human Phenotype	HP:0011034	Amyloidosis				7.29e-05	0.24	0.002	0.0173	12	124	IL10,PTPN22,ADA2,NOD2,FCGR2A,CCR1,APOE,NLRP3,ZFPM2,TLR4,OSMR,LYZ
Human Phenotype	HP:0100532	Scleritis				7.81e-05	0.257	0.00211	0.0183	6	29	IL10,PTPN22,ADA2,NOD2,CCR1,TLR4
Human Phenotype	HP:0001094	Iridocyclitis				7.81e-05	0.257	0.00211	0.0183	6	29	IL10,PTPN22,ADA2,NOD2,CCR1,TLR4
Human Phenotype	HP:0006775	Multiple myeloma				7.89e-05	0.259	0.00211	0.0183	12	125	IL10,ADA2,NOD2,FCGR2A,CCL2,CCR1,CCL11,MSR1,CD28,IGKC,TLR4,TNFRSF1B
Human Phenotype	HP:0000751	Personality changes				8.51e-05	0.28	0.00225	0.0195	11	107	IL10,ADA2,NOD2,TYROBP,CCL2,CCR1,CCL11,APOE,SLC2A3,TLR4,TREM2
Human Phenotype	HP:0001325	Hypoglycemic coma				8.61e-05	0.283	0.00225	0.0195	13	146	CYBB,IL10,NCF2,NCF4,ADA2,NOD2,BTK,CCL2,CCR1,CCL11,ZFPM2,TLR4,TREM2
Human Phenotype	HP:0001581	Recurrent skin infections				8.61e-05	0.283	0.00225	0.0195	13	146	CYBB,IL10,IL10RA,CLEC7A,PTPN22,NCF2,NCF4,BTK,CCL2,CCL11,COL1A1,ZFPM2,IGKC
Human Phenotype	HP:0100032	Immunoglobulin abnormality				9.08e-05	0.299	0.00232	0.0201	19	281	CYBB,IL10,CLEC7A,TCIRG1,NCF2,NCF4,ADA2,ADCY7,ITK,IFIH1,FCGR2A,BTK,CCL2,CCL11,COL1A1,PLA2G7,CD28,IGKC,TNFRSF1B
Human Phenotype	HP:0010701	Abnormal immunoglobulin level				9.08e-05	0.299	0.00232	0.0201	19	281	CYBB,IL10,CLEC7A,TCIRG1,NCF2,NCF4,ADA2,ADCY7,ITK,IFIH1,FCGR2A,BTK,CCL2,CCL11,COL1A1,PLA2G7,CD28,IGKC,TNFRSF1B
Human Phenotype	HP:0011839	Abnormal T cell count				9.23e-05	0.304	0.00232	0.0201	8	57	IL10,ACP5,PTPRC,CCL2,CCL11,LEP,CD3G,IL7R
Human Phenotype	HP:0030332	Abnormal T cell morphology				9.23e-05	0.304	0.00232	0.0201	8	57	IL10,ACP5,PTPRC,CCL2,CCL11,LEP,CD3G,IL7R
Human Phenotype	HP:0004944	Dilatation of the cerebral artery				9.23e-05	0.304	0.00232	0.0201	8	57	IL10,ADA2,NOD2,CCR1,MFAP5,LOX,TLR4,IL6
Human Phenotype	HP:0005575	Hemolytic-uremic syndrome				9.36e-05	0.308	0.00233	0.0202	5	19	CFH,FCGR2A,C3,C3AR1,THBD
Human Phenotype	HP:0002103	Abnormal pleura morphology				9.53e-05	0.314	0.00233	0.0202	19	282	IL10,CFH,GATA6,PTPN22,ADA2,NOD2,FCGR2A,FCGR2B,CCL2,CCR1,CCL11,MAP3K8,APOE,ZFPM2,CD28,IGKC,TLR4,TNFRSF1B,IL6
Human Phenotype	HP:0005372	Abnormality of B cell physiology				9.53e-05	0.314	0.00233	0.0202	19	282	CYBB,IL10,CLEC7A,TCIRG1,NCF2,NCF4,ADA2,ADCY7,ITK,IFIH1,FCGR2A,BTK,CCL2,CCL11,COL1A1,PLA2G7,CD28,IGKC,TNFRSF1B
Human Phenotype	HP:0001075	Atrophic scars				9.56e-05	0.315	0.00233	0.0202	6	30	C1R,C1S,MMP1,COL1A1,COL1A2,COL5A1
Human Phenotype	HP:0010651	Abnormal meningeal morphology				9.75e-05	0.321	0.00236	0.0205	23	383	CYBB,IL10,GATA6,PTPN22,NCF2,NCF4,ADA2,NOD2,BTK,CCL2,CCR1,CCL11,COL11A1,NLRP3,ZFPM2,MFAP5,CD28,LOX,IGKC,TLR4,TREM2,TNFRSF1B,IL6
Human Phenotype	HP:0100584	Endocarditis				0.000105	0.345	0.00252	0.0218	8	58	IL10,ADA2,NOD2,CCL2,CCR1,CCL11,ZFPM2,TLR4
Human Phenotype	HP:0006704	Abnormal coronary artery morphology				0.000107	0.353	0.00256	0.0222	12	129	IL10,PTPN22,ADA2,NOD2,FCGR2A,CCR1,NT5E,APOE,MFAP5,LIPA,LOX,TLR4
Human Phenotype	HP:0001269	Hemiparesis				0.00011	0.361	0.00258	0.0224	11	110	IL10,CFH,PTPN22,ADA2,NOD2,CCR1,C3AR1,SLC1A3,ZFPM2,TLR4,IL6
Human Phenotype	HP:0100280	Crohn's disease				0.00011	0.361	0.00258	0.0224	11	110	CYBB,IL10,PTPN22,NCF2,NCF4,ADA2,ADCY7,NOD2,CCR1,ZFPM2,TLR4
Human Phenotype	HP:0002727	Abnormal tendency to infections of the skin				0.000114	0.374	0.00266	0.023	13	150	CYBB,IL10,IL10RA,CLEC7A,PTPN22,NCF2,NCF4,BTK,CCL2,CCL11,COL1A1,ZFPM2,IGKC
Human Phenotype	HP:0100533	Inflammatory abnormality of the eye				0.000116	0.381	0.00268	0.0233	18	262	CYBB,IL10,CLEC7A,PTPN22,NCF2,NCF4,ADA2,NOD2,BTK,CCR1,MMP1,COL8A2,BIRC3,APOE,NLRP3,ZFPM2,TLR4,IL6
Human Phenotype	HP:0012140	Abnormality of cells of the lymphoid lineage				0.000117	0.384	0.00268	0.0233	21	336	CYBB,IL10,ACP5,TCIRG1,PTPN22,NCF2,NCF4,ADCY7,ITK,PTPRC,FCGR2A,CCL2,CCL11,APOE,LEP,ZFPM2,CD3G,CD28,IGKC,TNFRSF1B,IL7R
Human Phenotype	HP:0030057	Autoimmune antibody positivity				0.000124	0.408	0.00283	0.0246	10	93	IL10,CFH,PTPN22,ADA2,NOD2,FCGR2A,FCGR2B,CCR1,MMP2,TLR4
Human Phenotype	HP:0002620	Systemic artery abnormality				0.000131	0.431	0.00297	0.0258	26	471	IL10,SERPINF1,GATA6,TCIRG1,EVI2A,EVI2B,PTPN22,ADA2,NOD2,IFIH1,FCGR2A,GM2A,CCR1,COL1A1,COL1A2,COL5A1,NT5E,APOE,ZFPM2,MFAP5,LIPA,CD28,LOX,TLR4,TNFRSF1B,IL6
Human Phenotype	HP:0100326	Immunologic hypersensitivity				0.000132	0.435	0.00298	0.0259	19	289	CYBB,IL10,GATA6,PTPN22,NCF2,NCF4,ADA2,ADCY7,NOD2,FCGR2A,CCR1,CCL11,ALOX5,PLA2G7,APOE,ZFPM2,IGKC,TLR4,CSTA
Human Phenotype	HP:0001370	Rheumatoid arthritis				0.000137	0.452	0.00307	0.0267	14	174	IL10,CES1,ACP5,PTPN22,ADA2,ADCY7,NOD2,FCGR2A,CCL2,CCR1,CCL11,ZFPM2,TLR4,IL6
Human Phenotype	HP:0001928	Abnormality of coagulation				0.000145	0.477	0.00322	0.028	34	704	IL10,CFH,IL10RA,ACP5,GATA6,TCIRG1,PTPN22,ADA2,ADCY7,NOD2,FCGR2A,C1R,CCL2,C1S,CCR1,C3AR1,CCL11,COL1A1,COL1A2,COL5A1,APOE,NLRP3,ZFPM2,MSR1,MFAP5,THBD,CD28,LOX,CD36,TLR4,SERPINE1,TNFRSF1B,FYB1,IL6
Human Phenotype	HP:0007338	Hypermetric saccades				0.000157	0.517	0.00347	0.0301	5	21	IL10,ADA2,NOD2,CCR1,TLR4
Human Phenotype	HP:0012531	Pain				0.000162	0.532	0.00355	0.0308	35	738	CYBB,IL10,CFH,ASPN,GATA6,TCIRG1,PTPN22,NCF2,NCF4,ADA2,ADCY7,NOD2,TYROBP,FCGR2A,CCL2,C1S,CCR1,CCL11,MMP2,COL1A1,COL11A1,SFRP4,COMP,MAP3K8,BIRC3,NLRP3,ZFPM2,MSR1,MFAP5,LIPA,LOX,TLR4,TREM2,IL1RN,IL6
Human Phenotype	HP:0004039	Abnormality of ulnar metaphysis				0.000164	0.538	0.00356	0.0309	3	5	ACP5,MMP9,COMP
Human Phenotype	HP:0011360	Acquired abnormal hair pattern				0.000167	0.55	0.00362	0.0314	6	33	IL10,ADA2,NOD2,CCR1,APOE,TLR4
Human Phenotype	HP:0002665	Lymphoma				0.00017	0.559	0.00365	0.0317	21	345	IL10,CES1,PTPN22,ADA2,ADCY7,ITK,NOD2,FCGR2A,CCL2,COL14A1,CCR1,CCL11,MAP3K8,BIRC3,APOE,ZFPM2,MSR1,CD28,TLR4,TNFRSF1B,IL7R
Human Phenotype	HP:0009789	Perianal abscess				0.000181	0.596	0.00387	0.0336	4	12	CYBB,IL10RA,NCF2,NCF4
Human Phenotype	HP:0000620	Dacryocystitis				0.000199	0.654	0.00415	0.036	6	34	IL10,PTPN22,ADA2,NOD2,CCR1,TLR4
Human Phenotype	HP:0005406	Recurrent bacterial skin infections				0.000199	0.654	0.00415	0.036	6	34	CYBB,IL10RA,PTPN22,NCF2,NCF4,BTK
Human Phenotype	HP:0001101	Iritis				0.000199	0.655	0.00415	0.036	5	22	IL10,ADA2,NOD2,CCR1,TLR4
Human Phenotype	HP:0002638	Superficial thrombophlebitis				0.000199	0.655	0.00415	0.036	5	22	IL10,ADA2,NOD2,CCR1,TLR4
Human Phenotype	HP:0200036	Skin nodule				0.000205	0.674	0.00424	0.0368	12	138	IL10,EVI2A,EVI2B,ADA2,NOD2,CCR1,MMP2,COL1A1,COL5A1,APOE,LIPA,TLR4
Human Phenotype	HP:0001659	Aortic regurgitation				0.000213	0.7	0.00438	0.038	9	81	IL10,PTPN22,ADA2,NOD2,CCR1,COL1A2,MFAP5,LOX,TLR4
Human Phenotype	HP:0003453	Antineutrophil antibody positivity				0.00023	0.757	0.0047	0.0408	7	49	IL10,PTPN22,ADA2,NOD2,FCGR2A,CCR1,TLR4
Human Phenotype	HP:0001085	Papilledema				0.000237	0.78	0.00481	0.0418	8	65	IL10,PTPN22,ADA2,NOD2,CCR1,ZFPM2,TLR4,IL6
Human Phenotype	HP:0001937	Microangiopathic hemolytic anemia				0.000256	0.843	0.00517	0.0449	4	13	CFH,C3,C3AR1,THBD
Human Phenotype	HP:0000992	Cutaneous photosensitivity				0.000258	0.849	0.00518	0.0449	11	121	CYBB,PTPN22,NCF2,NCF4,IFIH1,FCGR2A,FCGR2B,SAMHD1,MSR1,CD28,TNFRSF1B
Human Phenotype	HP:0011096	Peripheral demyelination				0.000286	0.942	0.00571	0.0495	12	143	IL10,ADA2,NOD2,TYROBP,GM2A,CCL2,CCR1,CCL11,ZFPM2,TLR4,TREM2,IL6
Human Phenotype	HP:0000031	Epididymitis				0.000293	0.965	0.00581	0.0504	8	67	IL10,ADA2,NOD2,FCGR2A,BTK,CCR1,ZFPM2,TLR4
Human Phenotype	HP:0025323	Abnormal arterial physiology				0.000297	0.977	0.00585	0.0508	7	51	IL10,PTPN22,ADA2,NOD2,CCR1,NT5E,TLR4
Human Phenotype	HP:0004295	Abnormality of the gastric mucosa				0.000308	1	0.00593	0.0515	9	85	IL10,GATA6,ADA2,NOD2,CCR1,ZFPM2,MSR1,TLR4,IL1RN
Human Phenotype	HP:0003301	Irregular vertebral endplates				0.000308	1	0.00593	0.0515	5	24	ACP5,COL10A1,COL11A1,COMP,PAPSS2
Human Phenotype	HP:0006685	Endocardial fibrosis				0.000308	1	0.00593	0.0515	5	24	IL10,ADA2,NOD2,CCR1,TLR4
Human Phenotype	HP:0004850	Recurrent deep vein thrombosis				0.000308	1	0.00593	0.0515	5	24	IL10,ADA2,NOD2,CCR1,TLR4
Human Phenotype	HP:0007417	Discoid lupus rash				0.000321	1	0.0061	0.053	3	6	CYBB,NCF2,NCF4
Human Phenotype	HP:0011726	Persistent fetal circulation				0.000321	1	0.0061	0.053	3	6	GATA6,ZFPM2,IL6
Human Phenotype	HP:0003765	Psoriasiform dermatitis				0.000341	1	0.00644	0.0559	10	105	IL10,ADA2,NOD2,CCL2,CCR1,CCL11,ZFPM2,CD28,TLR4,TNFRSF1B
Human Phenotype	HP:0010702	Increased circulating antibody level				0.000347	1	0.00652	0.0565	14	190	CYBB,IL10,TCIRG1,NCF2,NCF4,ADA2,ADCY7,IFIH1,FCGR2A,CCL2,CCL11,COL1A1,PLA2G7,IGKC
Human Phenotype	HP:0005263	Gastritis				0.000352	1	0.00657	0.057	4	14	GATA6,ZFPM2,MSR1,IL1RN
Human Phenotype	HP:0000704	Periodontitis				0.00036	1	0.00669	0.0581	8	69	IL10,ITGB2,C1R,CCL2,C1S,CCL11,COL5A1,APOE
Human Phenotype	HP:0005561	Abnormality of bone marrow cell morphology				0.000364	1	0.00673	0.0584	41	958	CYBB,IL10,CFH,ACP5,GATA6,TCIRG1,PTPN22,NCF2,NCF4,HMOX1,ADA2,ADCY7,ITK,NOD2,PTPRC,FCGR2A,FCGR2B,BTK,GM2A,CCL2,C3,CCR1,C3AR1,CCL11,MMP1,BIRC3,NABP1,APOE,LEP,SLC2A3,NLRP3,ZFPM2,MSR1,THBD,LIPA,CD3G,CD28,IGKC,TLR4,TNFRSF1B,IL7R
Human Phenotype	HP:0000123	Nephritis				0.00037	1	0.00679	0.0589	12	147	IL10,CFH,PTPN22,ADA2,NOD2,FCGR2A,FCGR2B,C1QA,C1QB,C3,CCR1,TLR4
Human Phenotype	HP:0001297	Stroke				0.000372	1	0.00679	0.0589	21	365	IL10,CFH,GATA6,PTPN22,ADA2,NOD2,CCL2,CCR1,CCL11,ALOX5AP,COL5A1,SLC2A3,ZFPM2,MFAP5,LIPA,CD28,LOX,TLR4,TREM2,TNFRSF1B,IL6
Human Phenotype	HP:0004419	Recurrent thrombophlebitis				0.000378	1	0.00683	0.0592	5	25	IL10,ADA2,NOD2,CCR1,TLR4
Human Phenotype	HP:0011531	Vitritis				0.000378	1	0.00683	0.0592	5	25	IL10,ADA2,NOD2,CCR1,TLR4
[truncated: 137,620 more rows]
