# Supplementary material for: Characterization of Continuous Transcriptional Heterogeneity in High-Risk Blastemal-Type Wilms’ Tumors Using Unsupervised Machine Learning
Source: Int J Mol Sci. 2023 Feb 9;24(4):3532. doi: 10.3390/ijms24043532 (PMC9965420; doi:10.3390/ijms24043532)
Supplement: Supplementary file 1 [file ijms-24-03532-s001.zip › Table S9 - GO enrichment topic3_blastemal.xlsx]

## Sheet: Genes list
k3
ADGRG2
ARHGAP11A
ASPM
AURKA
AURKB
B3GALT2
BACH2
BIRC5
BRINP1
BRIP1
BUB1
BUB1B
C3orf52
CCNA2
CCNB1
CCNB2
CCNE2
CDC20
CDC25A
CDC25C
CDC6
CDH7
CDK1
CDK5R1
CDKN3
CENPE
CENPF
CENPU
CEP55
CHD7
CHEK1
CHRNA1
CHRNA5
CITED1
CLGN
CNTN5
COL13A1
COL2A1
DEPDC1
DLGAP5
DNA2
DTL
EDN3
ELAVL4
ELOVL2
EXO1
EYA1
EZH2
FANCI
FBXO5
FOXM1
FZD10
GINS1
GINS2
GREB1
HAS2
HELLS
HJURP
HMGA2
HMMR
HOXA11
HOXD11
ITGA8
KIF11
KIF14
KIF15
KIF18A
KIF18B
KIF20A
KIF23
KIF2C
KIF4A
LMNB1
LRRTM2
LYPD1
MAD2L1
MCM10
MCM2
MCM3AP-AS1
MEOX1
MYCN
NCAPG
NCAPH
NDC80
NEIL3
NEK2
NPTX2
NPY
NRXN1
NUSAP1
OIP5
PARPBP
PBK
PCLAF
PEG10
PLAAT1
PLAG1
PLK4
POLE2
PRAME
PRC1
RGS17
RGS7
RRM2
SALL1
SIX2
SLC15A1
SLC25A21
SMPX
SOX11
SPC25
SUV39H2
TMEM100
TMEM35A
TOP2A
TPX2
TTK
TUBB2B
UBE2C
UNC5C
VASH2

## Sheet: Toppgene results
Category	ID	Name	Selected	Source	p-value	q-value Bonferroni	q-value FDR B&H	q-value FDR B&Y	Hit Count in Query List	Hit Count in Genome	Hit in Query List
GO: Molecular Function	GO:0008017	microtubule binding			1.4e-12	5.76e-10	5.76e-10	3.8e-09	17	283	NUSAP1,KIF18A,KIF23,CENPE,CENPF,DLGAP5,KIF4A,BIRC5,PRC1,KIF20A,KIF15,VASH2,TPX2,KIF14,KIF18B,KIF11,KIF2C
GO: Molecular Function	GO:0015631	tubulin binding			3.09e-12	1.27e-09	6.37e-10	4.2e-09	19	395	NUSAP1,KIF18A,KIF23,CENPE,CENPF,DLGAP5,KIF4A,BIRC5,PRC1,KIF20A,CDK5R1,KIF15,UNC5C,VASH2,TPX2,KIF14,KIF18B,KIF11,KIF2C
GO: Molecular Function	GO:0003777	microtubule motor activity			2.78e-11	1.14e-08	3.81e-09	2.52e-08	10	75	KIF18A,KIF23,CENPE,KIF4A,KIF20A,KIF15,KIF14,KIF18B,KIF11,KIF2C
GO: Molecular Function	GO:0003774	motor activity			9.05e-09	3.73e-06	9.33e-07	6.15e-06	10	134	KIF18A,KIF23,CENPE,KIF4A,KIF20A,KIF15,KIF14,KIF18B,KIF11,KIF2C
GO: Molecular Function	GO:0005524	ATP binding			5.2e-08	2.14e-05	4.21e-06	2.78e-05	28	1485	KIF18A,KIF23,BRIP1,CENPE,UBE2C,PBK,KIF4A,MCM2,CHD7,CHEK1,TTK,KIF20A,AURKA,NEK2,KIF15,BUB1,BUB1B,KIF14,CDK1,CDC6,KIF18B,DNA2,PLK4,TOP2A,KIF11,AURKB,KIF2C,HELLS
GO: Molecular Function	GO:0008574	ATP-dependent microtubule motor activity, plus-end-directed			6.13e-08	2.52e-05	4.21e-06	2.78e-05	5	18	KIF18A,CENPE,KIF14,KIF18B,KIF11
GO: Molecular Function	GO:0019900	kinase binding			7.86e-08	3.24e-05	4.63e-06	3.06e-05	22	969	FOXM1,MYCN,CENPE,PRC1,CCNA2,CCNB1,KIF20A,AURKA,CDK5R1,FBXO5,LMNB1,CCNB2,CCNE2,UNC5C,TPX2,KIF14,CDC6,CDC25A,CDC25C,TOP2A,KIF11,AURKB
GO: Molecular Function	GO:0032559	adenyl ribonucleotide binding			1.54e-07	6.34e-05	7.93e-06	5.23e-05	28	1564	KIF18A,KIF23,BRIP1,CENPE,UBE2C,PBK,KIF4A,MCM2,CHD7,CHEK1,TTK,KIF20A,AURKA,NEK2,KIF15,BUB1,BUB1B,KIF14,CDK1,CDC6,KIF18B,DNA2,PLK4,TOP2A,KIF11,AURKB,KIF2C,HELLS
GO: Molecular Function	GO:0030554	adenyl nucleotide binding			1.83e-07	7.53e-05	8.37e-06	5.52e-05	28	1577	KIF18A,KIF23,BRIP1,CENPE,UBE2C,PBK,KIF4A,MCM2,CHD7,CHEK1,TTK,KIF20A,AURKA,NEK2,KIF15,BUB1,BUB1B,KIF14,CDK1,CDC6,KIF18B,DNA2,PLK4,TOP2A,KIF11,AURKB,KIF2C,HELLS
GO: Molecular Function	GO:0016887	ATPase			3.53e-07	0.000145	1.45e-05	9.6e-05	16	569	KIF18A,KIF23,BRIP1,CENPE,MCM2,CHD7,NCAPH,KIF20A,KIF15,KIF14,KIF18B,DNA2,TOP2A,KIF11,KIF2C,HELLS
GO: Molecular Function	GO:0035639	purine ribonucleoside triphosphate binding			1.11e-06	0.000458	3.86e-05	0.000255	29	1829	KIF18A,KIF23,BRIP1,CENPE,UBE2C,PBK,KIF4A,MCM2,TUBB2B,CHD7,CHEK1,TTK,KIF20A,AURKA,NEK2,KIF15,BUB1,BUB1B,KIF14,CDK1,CDC6,KIF18B,DNA2,PLK4,TOP2A,KIF11,AURKB,KIF2C,HELLS
GO: Molecular Function	GO:0019901	protein kinase binding			1.18e-06	0.000486	3.86e-05	0.000255	19	868	FOXM1,CENPE,PRC1,CCNA2,CCNB1,KIF20A,AURKA,CDK5R1,FBXO5,LMNB1,CCNB2,CCNE2,UNC5C,TPX2,KIF14,CDC25A,CDC25C,TOP2A,KIF11
GO: Molecular Function	GO:0140097	catalytic activity, acting on DNA			1.22e-06	0.000502	3.86e-05	0.000255	10	226	BRIP1,POLE2,MCM2,CHD7,NCAPH,HMGA2,EXO1,NEIL3,DNA2,TOP2A
GO: Molecular Function	GO:0035173	histone kinase activity			2.23e-06	0.000919	6.56e-05	0.000433	4	16	CHEK1,AURKA,CDK1,AURKB
GO: Molecular Function	GO:1990939	ATP-dependent microtubule motor activity			2.47e-06	0.00102	6.78e-05	0.000448	5	36	KIF18A,CENPE,KIF14,KIF18B,KIF11
GO: Molecular Function	GO:0032555	purine ribonucleotide binding			3.28e-06	0.00135	7.97e-05	0.000526	29	1930	KIF18A,KIF23,BRIP1,CENPE,UBE2C,PBK,KIF4A,MCM2,TUBB2B,CHD7,CHEK1,TTK,KIF20A,AURKA,NEK2,KIF15,BUB1,BUB1B,KIF14,CDK1,CDC6,KIF18B,DNA2,PLK4,TOP2A,KIF11,AURKB,KIF2C,HELLS
GO: Molecular Function	GO:0003682	chromatin binding			3.29e-06	0.00136	7.97e-05	0.000526	16	675	BRIP1,CENPF,PCLAF,CITED1,CHD7,EZH2,NCAPH,SUV39H2,MEOX1,HMGA2,SALL1,EXO1,CDK1,CDC6,TOP2A,HELLS
GO: Molecular Function	GO:0032553	ribonucleotide binding			3.95e-06	0.00163	9.03e-05	0.000596	29	1948	KIF18A,KIF23,BRIP1,CENPE,UBE2C,PBK,KIF4A,MCM2,TUBB2B,CHD7,CHEK1,TTK,KIF20A,AURKA,NEK2,KIF15,BUB1,BUB1B,KIF14,CDK1,CDC6,KIF18B,DNA2,PLK4,TOP2A,KIF11,AURKB,KIF2C,HELLS
GO: Molecular Function	GO:0017076	purine nucleotide binding			4.19e-06	0.00173	9.09e-05	0.0006	29	1954	KIF18A,KIF23,BRIP1,CENPE,UBE2C,PBK,KIF4A,MCM2,TUBB2B,CHD7,CHEK1,TTK,KIF20A,AURKA,NEK2,KIF15,BUB1,BUB1B,KIF14,CDK1,CDC6,KIF18B,DNA2,PLK4,TOP2A,KIF11,AURKB,KIF2C,HELLS
GO: Molecular Function	GO:0016538	cyclin-dependent protein serine/threonine kinase regulator activity			1.3e-05	0.00534	0.000267	0.00176	5	50	CCNA2,CCNB1,CDK5R1,CCNB2,CCNE2
GO: Molecular Function	GO:0004672	protein kinase activity			1.43e-05	0.00591	0.000281	0.00186	16	759	PBK,CHEK1,TTK,CCNA2,CCNB1,AURKA,NEK2,CDK5R1,CCNB2,CCNE2,BUB1,BUB1B,TPX2,CDK1,PLK4,AURKB
GO: Molecular Function	GO:0008092	cytoskeletal protein binding			1.9e-05	0.00781	0.000355	0.00234	19	1053	NUSAP1,KIF18A,KIF23,CENPE,CENPF,DLGAP5,KIF4A,BIRC5,PRC1,KIF20A,CDK5R1,KIF15,UNC5C,VASH2,TPX2,KIF14,KIF18B,KIF11,KIF2C
GO: Molecular Function	GO:0017111	nucleoside-triphosphatase activity			3.24e-05	0.0133	0.00058	0.00383	22	1399	KIF18A,KIF23,BRIP1,CENPE,KIF4A,MCM2,TUBB2B,DEPDC1,CHD7,ARHGAP11A,NCAPH,RGS7,KIF20A,KIF15,KIF14,RGS17,KIF18B,DNA2,TOP2A,KIF11,KIF2C,HELLS
GO: Molecular Function	GO:0016462	pyrophosphatase activity			5.84e-05	0.0241	0.000945	0.00624	22	1455	KIF18A,KIF23,BRIP1,CENPE,KIF4A,MCM2,TUBB2B,DEPDC1,CHD7,ARHGAP11A,NCAPH,RGS7,KIF20A,KIF15,KIF14,RGS17,KIF18B,DNA2,TOP2A,KIF11,KIF2C,HELLS
GO: Molecular Function	GO:0016817	hydrolase activity, acting on acid anhydrides			5.96e-05	0.0246	0.000945	0.00624	22	1457	KIF18A,KIF23,BRIP1,CENPE,KIF4A,MCM2,TUBB2B,DEPDC1,CHD7,ARHGAP11A,NCAPH,RGS7,KIF20A,KIF15,KIF14,RGS17,KIF18B,DNA2,TOP2A,KIF11,KIF2C,HELLS
GO: Molecular Function	GO:0016818	hydrolase activity, acting on acid anhydrides, in phosphorus-containing anhydrides			5.96e-05	0.0246	0.000945	0.00624	22	1457	KIF18A,KIF23,BRIP1,CENPE,KIF4A,MCM2,TUBB2B,DEPDC1,CHD7,ARHGAP11A,NCAPH,RGS7,KIF20A,KIF15,KIF14,RGS17,KIF18B,DNA2,TOP2A,KIF11,KIF2C,HELLS
GO: Molecular Function	GO:0016773	phosphotransferase activity, alcohol group as acceptor			7.92e-05	0.0326	0.00121	0.00797	16	875	PBK,CHEK1,TTK,CCNA2,CCNB1,AURKA,NEK2,CDK5R1,CCNB2,CCNE2,BUB1,BUB1B,TPX2,CDK1,PLK4,AURKB
GO: Molecular Function	GO:0016301	kinase activity			0.000181	0.0745	0.00266	0.0176	16	940	PBK,CHEK1,TTK,CCNA2,CCNB1,AURKA,NEK2,CDK5R1,CCNB2,CCNE2,BUB1,BUB1B,TPX2,CDK1,PLK4,AURKB
GO: Molecular Function	GO:0004712	protein serine/threonine/tyrosine kinase activity			0.000205	0.0846	0.00292	0.0192	4	48	PBK,TTK,AURKA,AURKB
GO: Molecular Function	GO:0003688	DNA replication origin binding			0.000355	0.146	0.00466	0.0308	3	23	MCM2,MCM10,CDC6
GO: Molecular Function	GO:0016772	transferase activity, transferring phosphorus-containing groups			0.000361	0.149	0.00466	0.0308	17	1103	POLE2,PBK,CHEK1,TTK,CCNA2,CCNB1,AURKA,NEK2,CDK5R1,CCNB2,CCNE2,BUB1,BUB1B,TPX2,CDK1,PLK4,AURKB
GO: Molecular Function	GO:0003918	DNA topoisomerase type II (double strand cut, ATP-hydrolyzing) activity			0.000362	0.149	0.00466	0.0308	2	5	NCAPH,TOP2A
GO: Molecular Function	GO:0035174	histone serine kinase activity			0.000541	0.223	0.00655	0.0432	2	6	AURKA,AURKB
GO: Molecular Function	GO:0043515	kinetochore binding			0.000541	0.223	0.00655	0.0432	2	6	CENPE,TTK
GO: Molecular Function	GO:0004674	protein serine/threonine kinase activity			0.000595	0.245	0.00701	0.0462	10	470	PBK,CHEK1,TTK,AURKA,NEK2,BUB1,BUB1B,CDK1,PLK4,AURKB
GO: Molecular Function	GO:0010997	anaphase-promoting complex binding			0.001	0.413	0.0115	0.0756	2	8	FBXO5,CDC20
GO: Molecular Function	GO:0003678	DNA helicase activity			0.00125	0.514	0.0132	0.0872	4	77	BRIP1,MCM2,CHD7,DNA2
GO: Molecular Function	GO:0061575	cyclin-dependent protein serine/threonine kinase activator activity			0.00128	0.528	0.0132	0.0872	2	9	CCNB1,CDK5R1
GO: Molecular Function	GO:0017108	5'-flap endonuclease activity			0.00128	0.528	0.0132	0.0872	2	9	EXO1,DNA2
GO: Molecular Function	GO:0003916	DNA topoisomerase activity			0.00128	0.528	0.0132	0.0872	2	9	NCAPH,TOP2A
GO: Molecular Function	GO:0015464	acetylcholine receptor activity			0.00135	0.556	0.0136	0.0895	3	36	CHRNA1,CHRNA5,LYPD1
GO: Molecular Function	GO:0019887	protein kinase regulator activity			0.00141	0.579	0.0138	0.0909	6	200	CCNA2,CCNB1,CDK5R1,CCNB2,CCNE2,TPX2
GO: Molecular Function	GO:0042166	acetylcholine binding			0.00158	0.651	0.015	0.0987	3	38	CHRNA1,CHRNA5,LYPD1
GO: Molecular Function	GO:0048256	flap endonuclease activity			0.0016	0.658	0.015	0.0987	2	10	EXO1,DNA2
GO: Molecular Function	GO:0033130	acetylcholine receptor binding			0.00274	1	0.025	0.165	2	13	LYPD1,NRXN1
GO: Molecular Function	GO:0019207	kinase regulator activity			0.00296	1	0.0265	0.175	6	232	CCNA2,CCNB1,CDK5R1,CCNB2,CCNE2,TPX2
GO: Molecular Function	GO:0004386	helicase activity			0.00304	1	0.0266	0.176	5	161	BRIP1,MCM2,CHD7,DNA2,HELLS
GO: Molecular Function	GO:0003906	DNA-(apurinic or apyrimidinic site) endonuclease activity			0.00318	1	0.0273	0.18	2	14	HMGA2,NEIL3
GO: Molecular Function	GO:0004725	protein tyrosine phosphatase activity			0.00414	1	0.0331	0.219	4	107	CDKN3,EYA1,CDC25A,CDC25C
GO: Molecular Function	GO:0022848	acetylcholine-gated cation-selective channel activity			0.00416	1	0.0331	0.219	2	16	CHRNA1,CHRNA5
GO: Molecular Function	GO:0106311	protein threonine kinase activity			0.00418	1	0.0331	0.219	6	249	CHEK1,AURKA,NEK2,BUB1,BUB1B,AURKB
GO: Molecular Function	GO:0106310	protein serine kinase activity			0.00418	1	0.0331	0.219	6	249	CHEK1,AURKA,NEK2,BUB1,BUB1B,AURKB
GO: Molecular Function	GO:0016888	endodeoxyribonuclease activity, producing 5'-phosphomonoesters			0.00526	1	0.0394	0.26	2	18	EXO1,DNA2
GO: Molecular Function	GO:0043565	sequence-specific DNA binding			0.00581	1	0.0394	0.26	20	1799	FOXM1,MYCN,SOX11,BACH2,MCM2,CHD7,MCM10,EZH2,SUV39H2,MEOX1,HOXA11,HMGA2,SALL1,LMNB1,HOXD11,PLAG1,CDC6,SIX2,TOP2A,KIF2C
GO: Molecular Function	GO:0008301	DNA binding, bending			0.00585	1	0.0394	0.26	2	19	HMGA2,TOP2A
GO: Molecular Function	GO:0017116	single-stranded DNA helicase activity			0.00585	1	0.0394	0.26	2	19	MCM2,DNA2
GO: Molecular Function	GO:0003690	double-stranded DNA binding			0.00599	1	0.0394	0.26	20	1804	FOXM1,MYCN,SOX11,BACH2,MCM2,CHD7,MCM10,EZH2,SUV39H2,MEOX1,HOXA11,HMGA2,SALL1,LMNB1,HOXD11,PLAG1,NEIL3,CDC6,SIX2,KIF2C
GO: Molecular Function	GO:0072587	DNA topoisomerase type II (double strand cut, ATP-hydrolyzing) activator activity			0.00612	1	0.0394	0.26	1	1	NCAPH
GO: Molecular Function	GO:0072586	DNA topoisomerase type II (double strand cut, ATP-hydrolyzing) regulator activity			0.00612	1	0.0394	0.26	1	1	NCAPH
GO: Molecular Function	GO:1904931	MCM complex binding			0.00612	1	0.0394	0.26	1	1	NEIL3
GO: Molecular Function	GO:0005043	netrin receptor activity involved in chemorepulsion			0.00612	1	0.0394	0.26	1	1	UNC5C
GO: Molecular Function	GO:0035501	MH1 domain binding			0.00612	1	0.0394	0.26	1	1	HMGA2
GO: Molecular Function	GO:0070463	tubulin-dependent ATPase activity			0.00612	1	0.0394	0.26	1	1	KIF18A
GO: Molecular Function	GO:0051908	double-stranded DNA 5'-3' exodeoxyribonuclease activity			0.00612	1	0.0394	0.26	1	1	EXO1
GO: Molecular Function	GO:0055106	ubiquitin-protein transferase regulator activity			0.00648	1	0.0411	0.271	2	20	FBXO5,CDC20
GO: Molecular Function	GO:0051010	microtubule plus-end binding			0.00713	1	0.0445	0.294	2	21	KIF18A,KIF2C
GO: Molecular Function	GO:1990837	sequence-specific double-stranded DNA binding			0.00728	1	0.0448	0.295	19	1711	FOXM1,MYCN,SOX11,BACH2,MCM2,CHD7,MCM10,EZH2,SUV39H2,MEOX1,HOXA11,HMGA2,SALL1,LMNB1,HOXD11,PLAG1,CDC6,SIX2,KIF2C
GO: Molecular Function	GO:0051536	iron-sulfur cluster binding			0.0079	1	0.0472	0.311	3	67	BRIP1,KIF4A,DNA2
GO: Molecular Function	GO:0051540	metal cluster binding			0.0079	1	0.0472	0.311	3	67	BRIP1,KIF4A,DNA2
GO: Biological Process	GO:0000280	nuclear division			6.84e-46	1.89e-42	1.89e-42	1.61e-41	65	1283	FOXM1,NUSAP1,CDKN3,KIF18A,KIF23,BRIP1,CLGN,CENPE,CENPF,POLE2,UBE2C,DTL,DLGAP5,SPC25,PBK,KIF4A,MCM2,BIRC5,TUBB2B,BRINP1,CHEK1,HMMR,EYA1,MCM10,PRC1,RRM2,EZH2,NCAPH,TTK,SUV39H2,GINS1,EDN3,CCNA2,CCNB1,CEP55,KIF20A,AURKA,NEK2,NCAPG,HMGA2,FBXO5,KIF15,LMNB1,NDC80,CCNB2,CCNE2,BUB1,BUB1B,TPX2,ASPM,EXO1,KIF14,CDK1,CDC6,CDC20,KIF18B,CDC25A,CDC25C,DNA2,PLK4,TOP2A,MAD2L1,KIF11,AURKB,KIF2C
GO: Biological Process	GO:0048285	organelle fission			8.72e-45	2.41e-41	1.21e-41	1.03e-40	65	1336	FOXM1,NUSAP1,CDKN3,KIF18A,KIF23,BRIP1,CLGN,CENPE,CENPF,POLE2,UBE2C,DTL,DLGAP5,SPC25,PBK,KIF4A,MCM2,BIRC5,TUBB2B,BRINP1,CHEK1,HMMR,EYA1,MCM10,PRC1,RRM2,EZH2,NCAPH,TTK,SUV39H2,GINS1,EDN3,CCNA2,CCNB1,CEP55,KIF20A,AURKA,NEK2,NCAPG,HMGA2,FBXO5,KIF15,LMNB1,NDC80,CCNB2,CCNE2,BUB1,BUB1B,TPX2,ASPM,EXO1,KIF14,CDK1,CDC6,CDC20,KIF18B,CDC25A,CDC25C,DNA2,PLK4,TOP2A,MAD2L1,KIF11,AURKB,KIF2C
GO: Biological Process	GO:0000278	mitotic cell cycle	1		3.42e-42	9.47e-39	1.89e-39	1.61e-38	59	1108	FOXM1,NUSAP1,CDKN3,KIF18A,KIF23,CENPE,CENPF,POLE2,UBE2C,DTL,DLGAP5,SPC25,PBK,KIF4A,MCM2,BIRC5,TUBB2B,BRINP1,CHEK1,HMMR,EYA1,MCM10,PRC1,RRM2,EZH2,NCAPH,TTK,GINS1,EDN3,CCNA2,CCNB1,CEP55,KIF20A,AURKA,NEK2,NCAPG,HMGA2,FBXO5,KIF15,LMNB1,NDC80,CCNB2,CCNE2,BUB1,BUB1B,TPX2,KIF14,CDK1,CDC6,CDC20,KIF18B,CDC25A,CDC25C,DNA2,PLK4,MAD2L1,KIF11,AURKB,KIF2C
GO: Biological Process	GO:0140014	mitotic nuclear division			3.42e-42	9.47e-39	1.89e-39	1.61e-38	59	1108	FOXM1,NUSAP1,CDKN3,KIF18A,KIF23,CENPE,CENPF,POLE2,UBE2C,DTL,DLGAP5,SPC25,PBK,KIF4A,MCM2,BIRC5,TUBB2B,BRINP1,CHEK1,HMMR,EYA1,MCM10,PRC1,RRM2,EZH2,NCAPH,TTK,GINS1,EDN3,CCNA2,CCNB1,CEP55,KIF20A,AURKA,NEK2,NCAPG,HMGA2,FBXO5,KIF15,LMNB1,NDC80,CCNB2,CCNE2,BUB1,BUB1B,TPX2,KIF14,CDK1,CDC6,CDC20,KIF18B,CDC25A,CDC25C,DNA2,PLK4,MAD2L1,KIF11,AURKB,KIF2C
GO: Biological Process	GO:1903047	mitotic cell cycle process	1		3.42e-42	9.47e-39	1.89e-39	1.61e-38	59	1108	FOXM1,NUSAP1,CDKN3,KIF18A,KIF23,CENPE,CENPF,POLE2,UBE2C,DTL,DLGAP5,SPC25,PBK,KIF4A,MCM2,BIRC5,TUBB2B,BRINP1,CHEK1,HMMR,EYA1,MCM10,PRC1,RRM2,EZH2,NCAPH,TTK,GINS1,EDN3,CCNA2,CCNB1,CEP55,KIF20A,AURKA,NEK2,NCAPG,HMGA2,FBXO5,KIF15,LMNB1,NDC80,CCNB2,CCNE2,BUB1,BUB1B,TPX2,KIF14,CDK1,CDC6,CDC20,KIF18B,CDC25A,CDC25C,DNA2,PLK4,MAD2L1,KIF11,AURKB,KIF2C
GO: Biological Process	GO:0022402	cell cycle process	1		4.76e-41	1.32e-37	2.2e-38	1.87e-37	67	1671	FOXM1,NUSAP1,CDKN3,KIF18A,KIF23,BRIP1,CLGN,CENPE,CENPF,PCLAF,POLE2,UBE2C,DTL,DLGAP5,SPC25,PBK,KIF4A,MCM2,BIRC5,TUBB2B,BRINP1,CHEK1,HMMR,EYA1,MCM10,PRC1,RRM2,EZH2,NCAPH,TTK,SUV39H2,GINS1,EDN3,CCNA2,CCNB1,CEP55,KIF20A,AURKA,NEK2,CDK5R1,NCAPG,HMGA2,FBXO5,KIF15,LMNB1,NDC80,CCNB2,CCNE2,BUB1,BUB1B,TPX2,ASPM,EXO1,KIF14,CDK1,CDC6,CDC20,KIF18B,CDC25A,CDC25C,DNA2,PLK4,TOP2A,MAD2L1,KIF11,AURKB,KIF2C
GO: Biological Process	GO:0051301	cell division	1		1.2e-34	3.31e-31	4.73e-32	4.02e-31	45	704	NUSAP1,SOX11,KIF23,BRIP1,CENPE,CENPF,UBE2C,SPC25,KIF4A,OIP5,BIRC5,CITED1,PRC1,NCAPH,CCNA2,CCNB1,CEP55,KIF20A,AURKA,NEK2,NCAPG,HMGA2,FBXO5,NDC80,CCNB2,CCNE2,BUB1,BUB1B,TPX2,ASPM,KIF14,CDK1,CDC6,CDC20,KIF18B,CDC25A,CDC25C,PLK4,SIX2,TOP2A,MAD2L1,KIF11,AURKB,KIF2C,HELLS
GO: Biological Process	GO:0000070	mitotic sister chromatid segregation	1		4.2e-31	1.16e-27	1.45e-28	1.23e-27	27	172	NUSAP1,KIF18A,KIF23,CENPE,CENPF,UBE2C,DLGAP5,KIF4A,BIRC5,PRC1,NCAPH,TTK,CCNB1,CEP55,NEK2,NCAPG,FBXO5,NDC80,BUB1,BUB1B,KIF14,CDC6,CDC20,KIF18B,MAD2L1,AURKB,KIF2C
GO: Biological Process	GO:0000819	sister chromatid segregation			3.1e-30	8.56e-27	9.51e-28	8.09e-27	28	209	NUSAP1,KIF18A,KIF23,CENPE,CENPF,UBE2C,DLGAP5,KIF4A,BIRC5,PRC1,NCAPH,TTK,CCNB1,CEP55,NEK2,NCAPG,FBXO5,NDC80,BUB1,BUB1B,KIF14,CDC6,CDC20,KIF18B,TOP2A,MAD2L1,AURKB,KIF2C
GO: Biological Process	GO:0007059	chromosome segregation			3.55e-30	9.81e-27	9.81e-28	8.34e-27	33	359	NUSAP1,KIF18A,KIF23,BRIP1,CENPE,CENPF,UBE2C,DLGAP5,HJURP,SPC25,KIF4A,OIP5,BIRC5,PRC1,NCAPH,TTK,CCNB1,CEP55,NEK2,NCAPG,FBXO5,NDC80,CCNE2,BUB1,BUB1B,KIF14,CDC6,CDC20,KIF18B,TOP2A,MAD2L1,AURKB,KIF2C
GO: Biological Process	GO:0098813	nuclear chromosome segregation			9.05e-29	2.5e-25	2.28e-26	1.94e-25	30	294	NUSAP1,KIF18A,KIF23,BRIP1,CENPE,CENPF,UBE2C,DLGAP5,KIF4A,BIRC5,PRC1,NCAPH,TTK,CCNB1,CEP55,NEK2,NCAPG,FBXO5,NDC80,CCNE2,BUB1,BUB1B,KIF14,CDC6,CDC20,KIF18B,TOP2A,MAD2L1,AURKB,KIF2C
GO: Biological Process	GO:0044772	mitotic cell cycle phase transition			7.12e-28	1.97e-24	1.64e-25	1.4e-24	38	637	FOXM1,CDKN3,CENPE,CENPF,POLE2,UBE2C,DTL,DLGAP5,MCM2,BIRC5,CHEK1,HMMR,MCM10,RRM2,EZH2,TTK,CCNA2,CCNB1,AURKA,NEK2,HMGA2,FBXO5,LMNB1,NDC80,CCNB2,CCNE2,BUB1,BUB1B,TPX2,KIF14,CDK1,CDC6,CDC20,CDC25A,CDC25C,PLK4,MAD2L1,AURKB
GO: Biological Process	GO:0044770	cell cycle phase transition	1		1.06e-26	2.93e-23	2.25e-24	1.91e-23	38	686	FOXM1,CDKN3,CENPE,CENPF,POLE2,UBE2C,DTL,DLGAP5,MCM2,BIRC5,CHEK1,HMMR,MCM10,RRM2,EZH2,TTK,CCNA2,CCNB1,AURKA,NEK2,HMGA2,FBXO5,LMNB1,NDC80,CCNB2,CCNE2,BUB1,BUB1B,TPX2,KIF14,CDK1,CDC6,CDC20,CDC25A,CDC25C,PLK4,MAD2L1,AURKB
GO: Biological Process	GO:0051726	regulation of cell cycle	1		3.84e-26	1.06e-22	7.58e-24	6.44e-23	48	1311	FOXM1,NUSAP1,SOX11,CDKN3,KIF23,BRIP1,CENPE,CENPF,PCLAF,UBE2C,DTL,DLGAP5,BIRC5,BRINP1,CHEK1,HMMR,PRC1,RRM2,EZH2,TTK,EDN3,CCNA2,CCNB1,KIF20A,AURKA,NEK2,CDK5R1,HMGA2,FBXO5,LMNB1,NDC80,CCNB2,CCNE2,BUB1,BUB1B,TPX2,ASPM,KIF14,CDK1,CDC6,CDC20,CDC25A,CDC25C,DNA2,PLK4,MAD2L1,KIF11,AURKB
GO: Biological Process	GO:0051276	chromosome organization			3.9e-25	1.08e-21	7.19e-23	6.11e-22	47	1312	NUSAP1,KIF18A,KIF23,BRIP1,CENPE,CENPF,POLE2,UBE2C,DLGAP5,HJURP,CENPU,KIF4A,MCM2,OIP5,BIRC5,CHD7,CHEK1,EYA1,PRC1,EZH2,NCAPH,TTK,SUV39H2,CCNA2,CCNB1,CEP55,AURKA,NEK2,NCAPG,HMGA2,FBXO5,NDC80,CCNE2,BUB1,BUB1B,EXO1,KIF14,CDK1,CDC6,CDC20,KIF18B,DNA2,TOP2A,MAD2L1,AURKB,KIF2C,HELLS
GO: Biological Process	GO:0010564	regulation of cell cycle process	1		2.48e-23	6.86e-20	4.29e-21	3.65e-20	38	852	FOXM1,NUSAP1,KIF23,CENPE,CENPF,UBE2C,DTL,DLGAP5,BIRC5,CHEK1,HMMR,PRC1,RRM2,EZH2,TTK,EDN3,CCNB1,KIF20A,AURKA,NEK2,CDK5R1,HMGA2,FBXO5,LMNB1,NDC80,BUB1,BUB1B,TPX2,KIF14,CDK1,CDC6,CDC20,CDC25A,CDC25C,PLK4,MAD2L1,KIF11,AURKB
GO: Biological Process	GO:0007088	regulation of mitotic nuclear division			7.74e-22	2.14e-18	1.26e-19	1.07e-18	19	124	NUSAP1,CENPE,CENPF,DLGAP5,BIRC5,CHEK1,TTK,EDN3,CCNB1,AURKA,NEK2,FBXO5,NDC80,BUB1,BUB1B,CDC20,CDC25C,MAD2L1,AURKB
GO: Biological Process	GO:1901990	regulation of mitotic cell cycle phase transition			1.43e-21	3.97e-18	2.2e-19	1.87e-18	29	470	CENPE,CENPF,UBE2C,DTL,DLGAP5,BIRC5,CHEK1,HMMR,EZH2,TTK,CCNB1,AURKA,NEK2,HMGA2,FBXO5,LMNB1,NDC80,BUB1,BUB1B,TPX2,KIF14,CDK1,CDC6,CDC20,CDC25A,CDC25C,PLK4,MAD2L1,AURKB
GO: Biological Process	GO:0030071	regulation of mitotic metaphase/anaphase transition			1.2e-20	3.31e-17	1.7e-18	1.44e-17	15	62	CENPE,CENPF,UBE2C,DLGAP5,BIRC5,TTK,CCNB1,FBXO5,NDC80,BUB1,BUB1B,CDC6,CDC20,MAD2L1,AURKB
GO: Biological Process	GO:0007346	regulation of mitotic cell cycle			1.23e-20	3.4e-17	1.7e-18	1.44e-17	32	660	NUSAP1,CENPE,CENPF,UBE2C,DTL,DLGAP5,BIRC5,BRINP1,CHEK1,HMMR,EZH2,TTK,EDN3,CCNB1,AURKA,NEK2,HMGA2,FBXO5,LMNB1,NDC80,BUB1,BUB1B,TPX2,KIF14,CDK1,CDC6,CDC20,CDC25A,CDC25C,PLK4,MAD2L1,AURKB
GO: Biological Process	GO:1901987	regulation of cell cycle phase transition			1.45e-20	4.02e-17	1.91e-18	1.63e-17	29	511	CENPE,CENPF,UBE2C,DTL,DLGAP5,BIRC5,CHEK1,HMMR,EZH2,TTK,CCNB1,AURKA,NEK2,HMGA2,FBXO5,LMNB1,NDC80,BUB1,BUB1B,TPX2,KIF14,CDK1,CDC6,CDC20,CDC25A,CDC25C,PLK4,MAD2L1,AURKB
GO: Biological Process	GO:1902099	regulation of metaphase/anaphase transition of cell cycle			2.63e-20	7.27e-17	3.16e-18	2.69e-17	15	65	CENPE,CENPF,UBE2C,DLGAP5,BIRC5,TTK,CCNB1,FBXO5,NDC80,BUB1,BUB1B,CDC6,CDC20,MAD2L1,AURKB
GO: Biological Process	GO:0007091	metaphase/anaphase transition of mitotic cell cycle			2.63e-20	7.27e-17	3.16e-18	2.69e-17	15	65	CENPE,CENPF,UBE2C,DLGAP5,BIRC5,TTK,CCNB1,FBXO5,NDC80,BUB1,BUB1B,CDC6,CDC20,MAD2L1,AURKB
GO: Biological Process	GO:0051304	chromosome separation			3.29e-20	9.09e-17	3.79e-18	3.22e-17	17	103	CENPE,CENPF,UBE2C,DLGAP5,BIRC5,NCAPH,TTK,CCNB1,FBXO5,NDC80,BUB1,BUB1B,CDC6,CDC20,TOP2A,MAD2L1,AURKB
GO: Biological Process	GO:0010965	regulation of mitotic sister chromatid separation			5.54e-20	1.53e-16	5.9e-18	5.01e-17	15	68	CENPE,CENPF,UBE2C,DLGAP5,BIRC5,TTK,CCNB1,FBXO5,NDC80,BUB1,BUB1B,CDC6,CDC20,MAD2L1,AURKB
GO: Biological Process	GO:0044784	metaphase/anaphase transition of cell cycle			5.54e-20	1.53e-16	5.9e-18	5.01e-17	15	68	CENPE,CENPF,UBE2C,DLGAP5,BIRC5,TTK,CCNB1,FBXO5,NDC80,BUB1,BUB1B,CDC6,CDC20,MAD2L1,AURKB
GO: Biological Process	GO:0051783	regulation of nuclear division			7.11e-20	1.97e-16	7.28e-18	6.19e-17	19	156	NUSAP1,CENPE,CENPF,DLGAP5,BIRC5,CHEK1,TTK,EDN3,CCNB1,AURKA,NEK2,FBXO5,NDC80,BUB1,BUB1B,CDC20,CDC25C,MAD2L1,AURKB
GO: Biological Process	GO:0051306	mitotic sister chromatid separation			1.13e-19	3.12e-16	1.11e-17	9.46e-17	15	71	CENPE,CENPF,UBE2C,DLGAP5,BIRC5,TTK,CCNB1,FBXO5,NDC80,BUB1,BUB1B,CDC6,CDC20,MAD2L1,AURKB
GO: Biological Process	GO:0044839	cell cycle G2/M phase transition	1		1.41e-19	3.89e-16	1.34e-17	1.14e-16	23	291	FOXM1,CENPF,DTL,BIRC5,CHEK1,HMMR,CCNA2,CCNB1,AURKA,NEK2,HMGA2,FBXO5,LMNB1,NDC80,CCNB2,TPX2,KIF14,CDK1,CDC6,CDC25A,CDC25C,PLK4,AURKB
GO: Biological Process	GO:0090068	positive regulation of cell cycle process			1.58e-19	4.37e-16	1.46e-17	1.24e-16	24	331	NUSAP1,KIF23,CENPE,UBE2C,DTL,DLGAP5,BIRC5,EZH2,EDN3,CCNB1,AURKA,CDK5R1,HMGA2,FBXO5,LMNB1,NDC80,KIF14,CDK1,CDC6,CDC25A,CDC25C,PLK4,MAD2L1,AURKB
GO: Biological Process	GO:0051983	regulation of chromosome segregation			2.64e-19	7.31e-16	2.31e-17	1.96e-16	16	94	CENPE,CENPF,UBE2C,DLGAP5,BIRC5,TTK,CCNB1,FBXO5,NDC80,BUB1,BUB1B,CDC6,CDC20,MAD2L1,AURKB,KIF2C
GO: Biological Process	GO:0033045	regulation of sister chromatid segregation			2.75e-19	7.61e-16	2.31e-17	1.96e-16	15	75	CENPE,CENPF,UBE2C,DLGAP5,BIRC5,TTK,CCNB1,FBXO5,NDC80,BUB1,BUB1B,CDC6,CDC20,MAD2L1,AURKB
GO: Biological Process	GO:1905818	regulation of chromosome separation			2.75e-19	7.61e-16	2.31e-17	1.96e-16	15	75	CENPE,CENPF,UBE2C,DLGAP5,BIRC5,TTK,CCNB1,FBXO5,NDC80,BUB1,BUB1B,CDC6,CDC20,MAD2L1,AURKB
GO: Biological Process	GO:0000075	cell cycle checkpoint signaling			2.84e-19	7.86e-16	2.31e-17	1.97e-16	21	229	SOX11,BRIP1,CENPE,CENPF,DTL,BIRC5,CHEK1,TTK,CCNB1,AURKA,HMGA2,NDC80,BUB1,BUB1B,CDK1,CDC6,CDC20,CDC25C,DNA2,MAD2L1,AURKB
GO: Biological Process	GO:0000086	G2/M transition of mitotic cell cycle			5.26e-19	1.45e-15	4.15e-17	3.53e-16	22	271	FOXM1,CENPF,DTL,BIRC5,CHEK1,HMMR,CCNA2,CCNB1,AURKA,NEK2,HMGA2,FBXO5,LMNB1,CCNB2,TPX2,KIF14,CDK1,CDC6,CDC25A,CDC25C,PLK4,AURKB
GO: Biological Process	GO:1902850	microtubule cytoskeleton organization involved in mitosis			1.52e-18	4.19e-15	1.17e-16	9.9e-16	18	154	NUSAP1,KIF23,CENPE,DLGAP5,SPC25,KIF4A,EYA1,PRC1,TTK,CCNB1,AURKA,NEK2,NDC80,TPX2,CDC20,MAD2L1,KIF11,AURKB
GO: Biological Process	GO:0051321	meiotic cell cycle			2.1e-18	5.81e-15	1.49e-16	1.27e-15	22	289	KIF18A,BRIP1,CLGN,CENPE,NCAPH,TTK,SUV39H2,AURKA,NEK2,HMGA2,FBXO5,NDC80,CCNB2,CCNE2,BUB1,BUB1B,ASPM,EXO1,CDC20,CDC25A,CDC25C,TOP2A
GO: Biological Process	GO:0140013	meiotic nuclear division			2.1e-18	5.81e-15	1.49e-16	1.27e-15	22	289	KIF18A,BRIP1,CLGN,CENPE,NCAPH,TTK,SUV39H2,AURKA,NEK2,HMGA2,FBXO5,NDC80,CCNB2,CCNE2,BUB1,BUB1B,ASPM,EXO1,CDC20,CDC25A,CDC25C,TOP2A
GO: Biological Process	GO:1903046	meiotic cell cycle process			2.1e-18	5.81e-15	1.49e-16	1.27e-15	22	289	KIF18A,BRIP1,CLGN,CENPE,NCAPH,TTK,SUV39H2,AURKA,NEK2,HMGA2,FBXO5,NDC80,CCNB2,CCNE2,BUB1,BUB1B,ASPM,EXO1,CDC20,CDC25A,CDC25C,TOP2A
GO: Biological Process	GO:0045839	negative regulation of mitotic nuclear division			5.27e-18	1.46e-14	3.65e-16	3.1e-15	13	54	CENPE,CENPF,BIRC5,CHEK1,TTK,CCNB1,FBXO5,NDC80,BUB1,BUB1B,CDC20,MAD2L1,AURKB
GO: Biological Process	GO:0045787	positive regulation of cell cycle			1.1e-17	3.03e-14	7.39e-16	6.28e-15	25	444	NUSAP1,KIF23,CENPE,UBE2C,DTL,DLGAP5,BIRC5,CHEK1,EZH2,EDN3,CCNB1,AURKA,CDK5R1,HMGA2,FBXO5,LMNB1,NDC80,KIF14,CDK1,CDC6,CDC25A,CDC25C,PLK4,MAD2L1,AURKB
GO: Biological Process	GO:0000226	microtubule cytoskeleton organization			1.42e-17	3.94e-14	9.22e-16	7.84e-15	33	903	NUSAP1,KIF18A,KIF23,CENPE,PCLAF,DLGAP5,SPC25,KIF4A,BIRC5,TUBB2B,CHEK1,EYA1,PRC1,TTK,CCNB1,KIF20A,AURKA,NEK2,CDK5R1,FBXO5,NDC80,CCNB2,TPX2,ASPM,KIF14,CDK1,CDC20,KIF18B,PLK4,MAD2L1,KIF11,AURKB,KIF2C
GO: Biological Process	GO:0045841	negative regulation of mitotic metaphase/anaphase transition			1.43e-17	3.96e-14	9.22e-16	7.84e-15	12	43	CENPE,CENPF,BIRC5,TTK,CCNB1,FBXO5,NDC80,BUB1,BUB1B,CDC20,MAD2L1,AURKB
GO: Biological Process	GO:0045786	negative regulation of cell cycle			2.24e-17	6.19e-14	1.41e-15	1.2e-14	29	670	FOXM1,SOX11,CDKN3,BRIP1,CENPE,CENPF,DTL,BIRC5,BRINP1,CHEK1,RRM2,EZH2,TTK,CCNB1,AURKA,NEK2,CDK5R1,HMGA2,FBXO5,NDC80,BUB1,BUB1B,CDK1,CDC6,CDC20,CDC25C,DNA2,MAD2L1,AURKB
GO: Biological Process	GO:1902100	negative regulation of metaphase/anaphase transition of cell cycle			2.66e-17	7.36e-14	1.64e-15	1.39e-14	12	45	CENPE,CENPF,BIRC5,TTK,CCNB1,FBXO5,NDC80,BUB1,BUB1B,CDC20,MAD2L1,AURKB
GO: Biological Process	GO:0031577	spindle checkpoint signaling			3.58e-17	9.91e-14	2.02e-15	1.72e-14	12	46	CENPE,CENPF,BIRC5,TTK,CCNB1,AURKA,NDC80,BUB1,BUB1B,CDC20,MAD2L1,AURKB
GO: Biological Process	GO:0033048	negative regulation of mitotic sister chromatid segregation			3.58e-17	9.91e-14	2.02e-15	1.72e-14	12	46	CENPE,CENPF,BIRC5,TTK,CCNB1,FBXO5,NDC80,BUB1,BUB1B,CDC20,MAD2L1,AURKB
GO: Biological Process	GO:0033046	negative regulation of sister chromatid segregation			3.58e-17	9.91e-14	2.02e-15	1.72e-14	12	46	CENPE,CENPF,BIRC5,TTK,CCNB1,FBXO5,NDC80,BUB1,BUB1B,CDC20,MAD2L1,AURKB
GO: Biological Process	GO:2000816	negative regulation of mitotic sister chromatid separation			3.58e-17	9.91e-14	2.02e-15	1.72e-14	12	46	CENPE,CENPF,BIRC5,TTK,CCNB1,FBXO5,NDC80,BUB1,BUB1B,CDC20,MAD2L1,AURKB
GO: Biological Process	GO:0051784	negative regulation of nuclear division			3.8e-17	1.05e-13	2.1e-15	1.79e-14	13	62	CENPE,CENPF,BIRC5,CHEK1,TTK,CCNB1,FBXO5,NDC80,BUB1,BUB1B,CDC20,MAD2L1,AURKB
GO: Biological Process	GO:1905819	negative regulation of chromosome separation			6.35e-17	1.76e-13	3.44e-15	2.93e-14	12	48	CENPE,CENPF,BIRC5,TTK,CCNB1,FBXO5,NDC80,BUB1,BUB1B,CDC20,MAD2L1,AURKB
GO: Biological Process	GO:0033047	regulation of mitotic sister chromatid segregation			8.37e-17	2.32e-13	4.37e-15	3.71e-14	12	49	CENPE,CENPF,BIRC5,TTK,CCNB1,FBXO5,NDC80,BUB1,BUB1B,CDC20,MAD2L1,AURKB
GO: Biological Process	GO:0051985	negative regulation of chromosome segregation			8.37e-17	2.32e-13	4.37e-15	3.71e-14	12	49	CENPE,CENPF,BIRC5,TTK,CCNB1,FBXO5,NDC80,BUB1,BUB1B,CDC20,MAD2L1,AURKB
GO: Biological Process	GO:0007093	mitotic cell cycle checkpoint signaling			3.44e-16	9.52e-13	1.76e-14	1.5e-13	17	175	CENPE,CENPF,BIRC5,CHEK1,TTK,CCNB1,AURKA,HMGA2,NDC80,BUB1,BUB1B,CDK1,CDC6,CDC20,CDC25C,MAD2L1,AURKB
GO: Biological Process	GO:1901988	negative regulation of cell cycle phase transition			4.41e-16	1.22e-12	2.22e-14	1.88e-13	20	286	CENPE,CENPF,DTL,BIRC5,CHEK1,EZH2,TTK,CCNB1,AURKA,HMGA2,FBXO5,NDC80,BUB1,BUB1B,CDK1,CDC6,CDC20,CDC25C,MAD2L1,AURKB
GO: Biological Process	GO:0010389	regulation of G2/M transition of mitotic cell cycle			4.83e-16	1.34e-12	2.39e-14	2.03e-13	18	212	CENPF,DTL,CHEK1,HMMR,CCNB1,AURKA,NEK2,HMGA2,FBXO5,LMNB1,TPX2,KIF14,CDK1,CDC6,CDC25A,CDC25C,PLK4,AURKB
GO: Biological Process	GO:0007094	mitotic spindle assembly checkpoint signaling			5.5e-16	1.52e-12	2.62e-14	2.23e-13	11	41	CENPE,CENPF,BIRC5,TTK,CCNB1,NDC80,BUB1,BUB1B,CDC20,MAD2L1,AURKB
GO: Biological Process	GO:0071173	spindle assembly checkpoint signaling			5.5e-16	1.52e-12	2.62e-14	2.23e-13	11	41	CENPE,CENPF,BIRC5,TTK,CCNB1,NDC80,BUB1,BUB1B,CDC20,MAD2L1,AURKB
GO: Biological Process	GO:0007051	spindle organization			5.71e-16	1.58e-12	2.68e-14	2.28e-13	18	214	KIF23,CENPE,DLGAP5,SPC25,KIF4A,PRC1,TTK,CCNB1,AURKA,NEK2,FBXO5,NDC80,CCNB2,TPX2,ASPM,CDC20,KIF11,AURKB
GO: Biological Process	GO:2001251	negative regulation of chromosome organization			7.72e-16	2.14e-12	3.56e-14	3.03e-13	14	99	CENPE,CENPF,MCM2,BIRC5,TTK,CCNB1,FBXO5,NDC80,BUB1,BUB1B,CDC20,TOP2A,MAD2L1,AURKB
GO: Biological Process	GO:0010948	negative regulation of cell cycle process			9.56e-16	2.65e-12	4.32e-14	3.67e-13	22	386	CENPE,CENPF,DTL,BIRC5,CHEK1,RRM2,EZH2,TTK,CCNB1,AURKA,NEK2,HMGA2,FBXO5,NDC80,BUB1,BUB1B,CDK1,CDC6,CDC20,CDC25C,MAD2L1,AURKB
GO: Biological Process	GO:0007052	mitotic spindle organization			9.68e-16	2.68e-12	4.32e-14	3.67e-13	15	126	KIF23,CENPE,DLGAP5,SPC25,KIF4A,PRC1,TTK,CCNB1,AURKA,NEK2,NDC80,TPX2,CDC20,KIF11,AURKB
GO: Biological Process	GO:0071174	mitotic spindle checkpoint signaling			9.91e-16	2.74e-12	4.35e-14	3.7e-13	11	43	CENPE,CENPF,BIRC5,TTK,CCNB1,NDC80,BUB1,BUB1B,CDC20,MAD2L1,AURKB
GO: Biological Process	GO:0007017	microtubule-based process			1.54e-15	4.27e-12	6.67e-14	5.67e-13	34	1133	NUSAP1,KIF18A,KIF23,CENPE,PCLAF,DLGAP5,SPC25,KIF4A,BIRC5,TUBB2B,CHEK1,EYA1,PRC1,TTK,CCNB1,KIF20A,AURKA,NEK2,CDK5R1,FBXO5,KIF15,NDC80,CCNB2,TPX2,ASPM,KIF14,CDK1,CDC20,KIF18B,PLK4,MAD2L1,KIF11,AURKB,KIF2C
GO: Biological Process	GO:1901991	negative regulation of mitotic cell cycle phase transition			1.72e-15	4.77e-12	7.33e-14	6.24e-13	19	266	CENPE,CENPF,BIRC5,CHEK1,EZH2,TTK,CCNB1,AURKA,HMGA2,FBXO5,NDC80,BUB1,BUB1B,CDK1,CDC6,CDC20,CDC25C,MAD2L1,AURKB
GO: Biological Process	GO:1902749	regulation of cell cycle G2/M phase transition			1.89e-15	5.22e-12	7.92e-14	6.73e-13	18	229	CENPF,DTL,CHEK1,HMMR,CCNB1,AURKA,NEK2,HMGA2,FBXO5,LMNB1,TPX2,KIF14,CDK1,CDC6,CDC25A,CDC25C,PLK4,AURKB
GO: Biological Process	GO:0045930	negative regulation of mitotic cell cycle			1.59e-14	4.41e-11	6.58e-13	5.59e-12	20	345	CENPE,CENPF,BIRC5,BRINP1,CHEK1,EZH2,TTK,CCNB1,AURKA,HMGA2,FBXO5,NDC80,BUB1,BUB1B,CDK1,CDC6,CDC20,CDC25C,MAD2L1,AURKB
GO: Biological Process	GO:0071897	DNA biosynthetic process			5.71e-14	1.58e-10	2.32e-12	1.97e-11	22	471	BRIP1,CENPF,PCLAF,POLE2,DTL,MCM2,CHEK1,MCM10,RRM2,GINS1,CCNA2,NEK2,HMGA2,FBXO5,CCNE2,EXO1,GINS2,CDK1,CDC6,DNA2,TOP2A,AURKB
GO: Biological Process	GO:0051225	spindle assembly			1.6e-13	4.43e-10	6.42e-12	5.46e-11	14	144	KIF23,CENPE,KIF4A,PRC1,AURKA,NEK2,FBXO5,NDC80,CCNB2,TPX2,ASPM,CDC20,KIF11,AURKB
GO: Biological Process	GO:1901989	positive regulation of cell cycle phase transition			2.7e-13	7.46e-10	1.07e-11	9.06e-11	13	119	CENPE,UBE2C,DTL,DLGAP5,BIRC5,EZH2,CCNB1,FBXO5,LMNB1,CDK1,CDC6,CDC25A,CDC25C
GO: Biological Process	GO:0033044	regulation of chromosome organization			3.38e-13	9.35e-10	1.32e-11	1.12e-10	18	309	CENPE,CENPF,UBE2C,DLGAP5,MCM2,BIRC5,TTK,CCNB1,NEK2,FBXO5,NDC80,BUB1,BUB1B,CDC6,CDC20,TOP2A,MAD2L1,AURKB
GO: Biological Process	GO:1901992	positive regulation of mitotic cell cycle phase transition			9.43e-13	2.61e-09	3.62e-11	3.08e-10	12	102	CENPE,UBE2C,DTL,DLGAP5,BIRC5,CCNB1,FBXO5,LMNB1,CDK1,CDC6,CDC25A,CDC25C
GO: Biological Process	GO:0006260	DNA replication			2.14e-12	5.92e-09	8.11e-11	6.89e-10	17	297	BRIP1,PCLAF,POLE2,DTL,MCM2,CHEK1,MCM10,RRM2,GINS1,CCNA2,FBXO5,CCNE2,EXO1,GINS2,CDK1,CDC6,DNA2
GO: Biological Process	GO:0051303	establishment of chromosome localization			5.01e-12	1.39e-08	1.87e-10	1.59e-09	11	89	KIF18A,CENPE,CENPF,DLGAP5,BIRC5,CCNB1,CEP55,NDC80,KIF14,AURKB,KIF2C
GO: Biological Process	GO:0050000	chromosome localization			6.43e-12	1.78e-08	2.37e-10	2.02e-09	11	91	KIF18A,CENPE,CENPF,DLGAP5,BIRC5,CCNB1,CEP55,NDC80,KIF14,AURKB,KIF2C
GO: Biological Process	GO:0007057	spindle assembly involved in female meiosis I			6.82e-12	1.89e-08	2.48e-10	2.11e-09	5	5	CENPE,AURKA,FBXO5,NDC80,CCNB2
GO: Biological Process	GO:0022414	reproductive process			8.17e-12	2.26e-08	2.94e-10	2.5e-09	36	1711	KIF18A,BRIP1,CLGN,CENPE,PEG10,CITED1,BRINP1,CHD7,NCAPH,TTK,SUV39H2,CCNB1,AURKA,HOXA11,NEK2,HMGA2,SALL1,FBXO5,NDC80,ADGRG2,HOXD11,CCNB2,CCNE2,BUB1,VASH2,BUB1B,ASPM,EXO1,PLAG1,CDK1,HAS2,CDC20,CDC25A,CDC25C,PLK4,TOP2A
GO: Biological Process	GO:0006259	DNA metabolic process			8.32e-12	2.3e-08	2.95e-10	2.51e-09	29	1107	FOXM1,BRIP1,CENPF,PCLAF,POLE2,DTL,MCM2,CHEK1,EYA1,MCM10,RRM2,EZH2,GINS1,CCNA2,NEK2,HMGA2,FBXO5,CCNE2,FANCI,EXO1,GINS2,NEIL3,CDK1,CDC6,PARPBP,DNA2,TOP2A,AURKB,HELLS
GO: Biological Process	GO:0000003	reproduction			8.59e-12	2.38e-08	3.01e-10	2.56e-09	36	1714	KIF18A,BRIP1,CLGN,CENPE,PEG10,CITED1,BRINP1,CHD7,NCAPH,TTK,SUV39H2,CCNB1,AURKA,HOXA11,NEK2,HMGA2,SALL1,FBXO5,NDC80,ADGRG2,HOXD11,CCNB2,CCNE2,BUB1,VASH2,BUB1B,ASPM,EXO1,PLAG1,CDK1,HAS2,CDC20,CDC25A,CDC25C,PLK4,TOP2A
GO: Biological Process	GO:0090306	spindle assembly involved in meiosis			1.74e-11	4.81e-08	6.02e-10	5.12e-09	6	11	CENPE,AURKA,FBXO5,NDC80,CCNB2,ASPM
GO: Biological Process	GO:0045931	positive regulation of mitotic cell cycle			3.26e-11	9.02e-08	1.11e-09	9.47e-09	12	137	CENPE,UBE2C,DTL,DLGAP5,BIRC5,CCNB1,FBXO5,LMNB1,CDK1,CDC6,CDC25A,CDC25C
GO: Biological Process	GO:0007143	female meiotic nuclear division			9.88e-11	2.73e-07	3.33e-09	2.84e-08	8	41	CENPE,NCAPH,TTK,AURKA,FBXO5,NDC80,CCNB2,TOP2A
GO: Biological Process	GO:0033043	regulation of organelle organization			1.06e-10	2.94e-07	3.55e-09	3.02e-08	30	1317	NUSAP1,KIF18A,CENPE,CENPF,UBE2C,DLGAP5,MCM2,BIRC5,CHEK1,TTK,EDN3,CCNB1,AURKA,NEK2,CDK5R1,FBXO5,NRXN1,NDC80,BUB1,BUB1B,LRRTM2,TPX2,FZD10,CDC6,CDC20,CDC25C,PLK4,TOP2A,MAD2L1,AURKB
GO: Biological Process	GO:0044843	cell cycle G1/S phase transition			1.19e-10	3.29e-07	3.91e-09	3.33e-08	16	330	CDKN3,POLE2,MCM2,MCM10,RRM2,EZH2,CCNA2,CCNB1,AURKA,FBXO5,CCNE2,KIF14,CDK1,CDC6,CDC25A,CDC25C
GO: Biological Process	GO:0007056	spindle assembly involved in female meiosis			1.41e-10	3.9e-07	4.59e-09	3.9e-08	5	7	CENPE,AURKA,FBXO5,NDC80,CCNB2
GO: Biological Process	GO:0051310	metaphase plate congression			2.84e-10	7.86e-07	9.14e-09	7.77e-08	9	69	KIF18A,CENPE,CENPF,CCNB1,CEP55,NDC80,KIF14,AURKB,KIF2C
GO: Biological Process	GO:0007010	cytoskeleton organization			2.93e-10	8.1e-07	9.31e-09	7.92e-08	34	1745	NUSAP1,KIF18A,KIF23,CENPE,PCLAF,DLGAP5,SPC25,KIF4A,BIRC5,TUBB2B,CHEK1,EYA1,PRC1,TTK,CCNB1,KIF20A,AURKA,NEK2,CDK5R1,FBXO5,NDC80,CCNB2,TPX2,ASPM,KIF14,FZD10,CDK1,CDC20,KIF18B,PLK4,MAD2L1,KIF11,AURKB,KIF2C
GO: Biological Process	GO:0010971	positive regulation of G2/M transition of mitotic cell cycle			3.05e-10	8.44e-07	9.59e-09	8.15e-08	7	29	DTL,CCNB1,FBXO5,LMNB1,CDK1,CDC25A,CDC25C
GO: Biological Process	GO:0000082	G1/S transition of mitotic cell cycle	1		3.53e-10	9.77e-07	1.1e-08	9.33e-08	15	303	CDKN3,POLE2,MCM2,MCM10,RRM2,EZH2,CCNB1,AURKA,FBXO5,CCNE2,KIF14,CDK1,CDC6,CDC25A,CDC25C
GO: Biological Process	GO:0009790	embryo development			5.09e-10	1.41e-06	1.56e-08	1.33e-07	29	1316	COL2A1,MYCN,SOX11,COL13A1,CENPU,ITGA8,BIRC5,TUBB2B,CITED1,CHD7,CHEK1,EYA1,RRM2,GINS1,CCNB1,MEOX1,HOXA11,NEK2,CDK5R1,HMGA2,SALL1,HOXD11,CCNB2,VASH2,CDK1,TMEM100,PLK4,SIX2,TOP2A
GO: Biological Process	GO:1902751	positive regulation of cell cycle G2/M phase transition			6.48e-10	1.79e-06	1.97e-08	1.68e-07	7	32	DTL,CCNB1,FBXO5,LMNB1,CDK1,CDC25A,CDC25C
GO: Biological Process	GO:0007080	mitotic metaphase plate congression			8.64e-10	2.39e-06	2.6e-08	2.21e-07	8	53	KIF18A,CENPE,CCNB1,CEP55,NDC80,KIF14,AURKB,KIF2C
GO: Biological Process	GO:0000910	cytokinesis			8.93e-10	2.47e-06	2.66e-08	2.26e-07	12	182	NUSAP1,KIF23,KIF4A,BIRC5,PRC1,CEP55,KIF20A,AURKA,KIF14,CDC6,PLK4,AURKB
GO: Biological Process	GO:0000212	meiotic spindle organization			1.4e-09	3.87e-06	4.1e-08	3.49e-07	6	20	CENPE,AURKA,FBXO5,NDC80,CCNB2,ASPM
GO: Biological Process	GO:0010639	negative regulation of organelle organization			1.41e-09	3.9e-06	4.1e-08	3.49e-07	16	391	CENPE,CENPF,MCM2,BIRC5,CHEK1,TTK,CCNB1,FBXO5,NDC80,BUB1,BUB1B,TPX2,CDC20,TOP2A,MAD2L1,AURKB
GO: Biological Process	GO:0031145	anaphase-promoting complex-dependent catabolic process			1.54e-09	4.25e-06	4.43e-08	3.77e-07	9	83	UBE2C,CCNB1,AURKA,FBXO5,BUB1B,CDK1,CDC20,MAD2L1,AURKB
GO: Biological Process	GO:0090148	membrane fission			1.97e-09	5.44e-06	5.61e-08	4.77e-07	12	195	NUSAP1,KIF23,KIF4A,BIRC5,PRC1,CEP55,KIF20A,AURKA,KIF14,CDC6,PLK4,AURKB
GO: Biological Process	GO:0006974	cellular response to DNA damage stimulus			2.89e-09	7.99e-06	8.15e-08	6.93e-07	23	902	FOXM1,CDKN3,BRIP1,PCLAF,POLE2,DTL,MCM2,CHEK1,EYA1,MCM10,CCNB1,AURKA,HMGA2,FBXO5,FANCI,EXO1,GINS2,NEIL3,CDK1,PARPBP,CDC25C,DNA2,TOP2A
GO: Biological Process	GO:0007144	female meiosis I			3.05e-09	8.42e-06	8.42e-08	7.16e-07	5	11	CENPE,AURKA,FBXO5,NDC80,CCNB2
GO: Biological Process	GO:0044771	meiotic cell cycle phase transition			3.05e-09	8.42e-06	8.42e-08	7.16e-07	5	11	TTK,NDC80,CCNB2,CDC25A,CDC25C
GO: Biological Process	GO:0071459	protein localization to chromosome, centromeric region			4.09e-09	1.13e-05	1.12e-07	9.52e-07	8	64	HJURP,CENPU,OIP5,TTK,NDC80,BUB1B,CDK1,AURKB
GO: Biological Process	GO:0071103	DNA conformation change			4.19e-09	1.16e-05	1.14e-07	9.66e-07	15	363	NUSAP1,BRIP1,HJURP,CENPU,MCM2,OIP5,CHD7,NCAPH,CCNB1,NCAPG,HMGA2,CDK1,DNA2,TOP2A,HELLS
GO: Biological Process	GO:0009792	embryo development ending in birth or egg hatching			5.13e-09	1.42e-05	1.38e-07	1.17e-06	22	850	COL2A1,MYCN,SOX11,CENPU,CITED1,CHD7,CHEK1,EYA1,RRM2,GINS1,CCNB1,MEOX1,HOXA11,NEK2,CDK5R1,SALL1,HOXD11,CCNB2,VASH2,TMEM100,PLK4,SIX2
GO: Biological Process	GO:0008315	G2/MI transition of meiotic cell cycle			5.88e-09	1.63e-05	1.56e-07	1.33e-06	4	5	NDC80,CCNB2,CDC25A,CDC25C
GO: Biological Process	GO:0016572	histone phosphorylation			6.96e-09	1.93e-05	1.83e-07	1.56e-06	7	44	CHEK1,CCNA2,CCNB1,AURKA,HMGA2,CDK1,AURKB
GO: Biological Process	GO:0008284	positive regulation of cell population proliferation			7.44e-09	2.06e-05	1.94e-07	1.65e-06	25	1117	FOXM1,MYCN,SOX11,BIRC5,CITED1,EYA1,PRC1,EZH2,TTK,EDN3,CCNA2,CCNB1,HMGA2,FBXO5,VASH2,ASPM,KIF14,PLAG1,CDK1,HAS2,CDC6,CDC20,CDC25A,PRAME,SIX2
GO: Biological Process	GO:0090307	mitotic spindle assembly			9.49e-09	2.63e-05	2.44e-07	2.08e-06	8	71	KIF23,KIF4A,PRC1,NEK2,TPX2,CDC20,KIF11,AURKB
GO: Biological Process	GO:0051338	regulation of transferase activity			9.53e-09	2.64e-05	2.44e-07	2.08e-06	25	1131	CDKN3,CENPE,UBE2C,PBK,EZH2,EDN3,CCNA2,CCNB1,NEK2,CDK5R1,HMGA2,FBXO5,NRXN1,CCNB2,CCNE2,TPX2,KIF14,FZD10,CDK1,CDC6,CDC20,CDC25A,CDC25C,MAD2L1,AURKB
GO: Biological Process	GO:0061982	meiosis I cell cycle process			1.12e-08	3.09e-05	2.83e-07	2.41e-06	10	140	BRIP1,CENPE,AURKA,FBXO5,NDC80,CCNB2,CCNE2,CDC25A,CDC25C,TOP2A
GO: Biological Process	GO:0030261	chromosome condensation			1.13e-08	3.11e-05	2.83e-07	2.41e-06	7	47	NUSAP1,NCAPH,CCNB1,NCAPG,HMGA2,CDK1,TOP2A
GO: Biological Process	GO:0000079	regulation of cyclin-dependent protein serine/threonine kinase activity			1.16e-08	3.2e-05	2.89e-07	2.45e-06	9	104	CDKN3,CCNA2,CCNB1,CDK5R1,CCNB2,CCNE2,CDC6,CDC25A,CDC25C
GO: Biological Process	GO:1904029	regulation of cyclin-dependent protein kinase activity			1.62e-08	4.47e-05	3.99e-07	3.39e-06	9	108	CDKN3,CCNA2,CCNB1,CDK5R1,CCNB2,CCNE2,CDC6,CDC25A,CDC25C
GO: Biological Process	GO:0043009	chordate embryonic development			1.67e-08	4.62e-05	4.09e-07	3.48e-06	21	827	COL2A1,MYCN,SOX11,CENPU,CITED1,CHD7,CHEK1,EYA1,RRM2,GINS1,CCNB1,MEOX1,HOXA11,NEK2,SALL1,HOXD11,CCNB2,VASH2,TMEM100,PLK4,SIX2
GO: Biological Process	GO:0022403	cell cycle phase			1.9e-08	5.27e-05	4.62e-07	3.93e-06	10	148	BRIP1,CENPE,TTK,AURKA,FBXO5,NDC80,CCNB2,CCNE2,CDC20,TOP2A
GO: Biological Process	GO:0006323	DNA packaging			3.33e-08	9.21e-05	8.01e-07	6.81e-06	12	251	NUSAP1,HJURP,CENPU,MCM2,OIP5,NCAPH,CCNB1,NCAPG,HMGA2,CDK1,TOP2A,HELLS
GO: Biological Process	GO:0034508	centromere complex assembly			4.51e-08	0.000125	1.07e-06	9.13e-06	7	57	CENPE,CENPF,DLGAP5,HJURP,CENPU,OIP5,HELLS
GO: Biological Process	GO:0031570	DNA integrity checkpoint signaling			5.68e-08	0.000157	1.34e-06	1.14e-05	10	166	BRIP1,DTL,CHEK1,CCNB1,AURKA,HMGA2,CDK1,CDC6,CDC25C,DNA2
GO: Biological Process	GO:0008608	attachment of spindle microtubules to kinetochore			6.5e-08	0.00018	1.52e-06	1.3e-05	6	36	CENPE,CCNB1,NEK2,NDC80,AURKB,KIF2C
GO: Biological Process	GO:0032465	regulation of cytokinesis			7.49e-08	0.000207	1.74e-06	1.48e-05	8	92	KIF23,PRC1,KIF20A,AURKA,KIF14,CDC6,PLK4,AURKB
GO: Biological Process	GO:0044848	biological phase			7.94e-08	0.00022	1.83e-06	1.56e-05	10	172	BRIP1,CENPE,TTK,AURKA,FBXO5,NDC80,CCNB2,CCNE2,CDC20,TOP2A
GO: Biological Process	GO:0051256	mitotic spindle midzone assembly			8.12e-08	0.000225	1.86e-06	1.58e-05	4	8	KIF23,KIF4A,PRC1,AURKB
GO: Biological Process	GO:0007292	female gamete generation			9.34e-08	0.000258	2.12e-06	1.8e-05	10	175	CENPE,NCAPH,TTK,CCNB1,AURKA,FBXO5,NDC80,CCNB2,ASPM,TOP2A
GO: Biological Process	GO:0072331	signal transduction by p53 class mediator			9.42e-08	0.000261	2.12e-06	1.8e-05	12	276	FOXM1,BRIP1,CHEK1,CCNB1,AURKA,CDK5R1,TPX2,EXO1,CDK1,CDC25C,DNA2,AURKB
GO: Biological Process	GO:0034502	protein localization to chromosome			1.13e-07	0.000313	2.52e-06	2.14e-05	9	135	HJURP,CENPU,OIP5,EZH2,TTK,NDC80,BUB1B,CDK1,AURKB
GO: Biological Process	GO:0051129	negative regulation of cellular component organization			1.14e-07	0.000315	2.52e-06	2.14e-05	20	842	CENPE,CENPF,MCM2,BIRC5,CHEK1,TTK,CCNB1,CDK5R1,FBXO5,NRXN1,NDC80,BUB1,BUB1B,LRRTM2,TPX2,KIF14,CDC20,TOP2A,MAD2L1,AURKB
GO: Biological Process	GO:0051302	regulation of cell division			1.42e-07	0.000393	3.12e-06	2.65e-05	10	183	KIF23,PRC1,KIF20A,AURKA,ASPM,KIF14,CDC6,KIF18B,PLK4,AURKB
GO: Biological Process	GO:0098762	meiotic cell cycle phase			1.45e-07	0.000402	3.12e-06	2.65e-05	9	139	BRIP1,CENPE,TTK,AURKA,FBXO5,NDC80,CCNB2,CCNE2,TOP2A
GO: Biological Process	GO:0098764	meiosis I cell cycle phase			1.45e-07	0.000402	3.12e-06	2.65e-05	9	139	BRIP1,CENPE,TTK,AURKA,FBXO5,NDC80,CCNB2,CCNE2,TOP2A
GO: Biological Process	GO:0000022	mitotic spindle elongation			1.46e-07	0.000402	3.12e-06	2.65e-05	4	9	KIF23,KIF4A,PRC1,AURKB
GO: Biological Process	GO:0000279	M phase			1.54e-07	0.000427	3.29e-06	2.79e-05	9	140	BRIP1,CENPE,AURKA,FBXO5,NDC80,CCNB2,CCNE2,CDC20,TOP2A
GO: Biological Process	GO:0071900	regulation of protein serine/threonine kinase activity			1.66e-07	0.000459	3.5e-06	2.98e-05	16	550	CDKN3,PBK,EZH2,EDN3,CCNA2,CCNB1,CDK5R1,HMGA2,NRXN1,CCNB2,CCNE2,FZD10,CDK1,CDC6,CDC25A,CDC25C
GO: Biological Process	GO:0051231	spindle elongation			2.41e-07	0.000668	5.06e-06	4.3e-05	4	10	KIF23,KIF4A,PRC1,AURKB
GO: Biological Process	GO:0006281	DNA repair			3.71e-07	0.00103	7.71e-06	6.56e-05	16	584	FOXM1,BRIP1,PCLAF,POLE2,DTL,MCM2,CHEK1,EYA1,HMGA2,FANCI,EXO1,GINS2,NEIL3,CDK1,PARPBP,DNA2
GO: Biological Process	GO:0006270	DNA replication initiation			4.38e-07	0.00121	9.05e-06	7.69e-05	6	49	POLE2,MCM2,MCM10,FBXO5,CCNE2,CDC6
GO: Biological Process	GO:0051640	organelle localization			5.46e-07	0.00151	1.12e-05	9.48e-05	21	1018	NUSAP1,KIF18A,KIF23,CENPE,CENPF,DLGAP5,BIRC5,EYA1,CCNB1,CEP55,AURKA,NEK2,NRXN1,NDC80,ASPM,KIF14,CDK1,PLK4,MAD2L1,AURKB,KIF2C
GO: Biological Process	GO:0048568	embryonic organ development			5.49e-07	0.00152	1.12e-05	9.48e-05	15	527	COL2A1,MYCN,SOX11,COL13A1,ITGA8,TUBB2B,CITED1,CHD7,EYA1,HOXA11,SALL1,HOXD11,VASH2,PLK4,SIX2
GO: Biological Process	GO:0051255	spindle midzone assembly			5.64e-07	0.00156	1.14e-05	9.68e-05	4	12	KIF23,KIF4A,PRC1,AURKB
GO: Biological Process	GO:0006261	DNA-dependent DNA replication			7.25e-07	0.00201	1.45e-05	0.000124	9	168	POLE2,MCM2,MCM10,GINS1,FBXO5,CCNE2,GINS2,CDC6,DNA2
GO: Biological Process	GO:0035404	histone-serine phosphorylation			8.11e-07	0.00224	1.61e-05	0.000137	4	13	CCNB1,AURKA,HMGA2,AURKB
GO: Biological Process	GO:0006890	retrograde vesicle-mediated transport, Golgi to endoplasmic reticulum			8.6e-07	0.00238	1.7e-05	0.000144	7	87	KIF18A,KIF23,CENPE,KIF4A,KIF15,KIF11,KIF2C
GO: Biological Process	GO:0007100	mitotic centrosome separation			1.13e-06	0.00312	2.19e-05	0.000186	4	14	CHEK1,AURKA,NEK2,KIF11
GO: Biological Process	GO:0051984	positive regulation of chromosome segregation			1.13e-06	0.00312	2.19e-05	0.000186	4	14	CENPE,CCNB1,CDC6,AURKB
GO: Biological Process	GO:0051988	regulation of attachment of spindle microtubules to kinetochore			1.13e-06	0.00312	2.19e-05	0.000186	4	14	CENPE,CCNB1,NEK2,AURKB
GO: Biological Process	GO:0051445	regulation of meiotic cell cycle			1.21e-06	0.00336	2.33e-05	0.000198	6	58	TTK,FBXO5,ASPM,CDC20,CDC25A,CDC25C
GO: Biological Process	GO:0006468	protein phosphorylation			1.3e-06	0.00359	2.48e-05	0.000211	28	1776	CDKN3,CENPE,PBK,BIRC5,CHEK1,EZH2,TTK,EDN3,CCNA2,CCNB1,AURKA,NEK2,CDK5R1,HMGA2,NRXN1,CCNB2,CCNE2,BUB1,BUB1B,TPX2,KIF14,FZD10,CDK1,CDC6,CDC25A,CDC25C,PLK4,AURKB
GO: Biological Process	GO:0070925	organelle assembly			1.37e-06	0.00379	2.6e-05	0.000221	20	986	KIF23,CENPE,CENPF,DLGAP5,KIF4A,PRC1,AURKA,NEK2,FBXO5,NRXN1,NDC80,CCNB2,LRRTM2,TPX2,ASPM,CDK1,CDC20,PLK4,KIF11,AURKB
GO: Biological Process	GO:0051326	telophase			1.44e-06	0.00399	2.68e-05	0.000228	8	135	BRIP1,CENPE,AURKA,FBXO5,NDC80,CCNB2,CCNE2,TOP2A
GO: Biological Process	GO:0007134	meiotic telophase I			1.44e-06	0.00399	2.68e-05	0.000228	8	135	BRIP1,CENPE,AURKA,FBXO5,NDC80,CCNB2,CCNE2,TOP2A
GO: Biological Process	GO:0007127	meiosis I			1.44e-06	0.00399	2.68e-05	0.000228	8	135	BRIP1,CENPE,AURKA,FBXO5,NDC80,CCNB2,CCNE2,TOP2A
GO: Biological Process	GO:0007098	centrosome cycle			1.52e-06	0.00422	2.79e-05	0.000237	8	136	PCLAF,CHEK1,AURKA,NEK2,NDC80,CDK1,PLK4,KIF11
GO: Biological Process	GO:0051315	attachment of mitotic spindle microtubules to kinetochore			1.53e-06	0.00424	2.79e-05	0.000237	4	15	CENPE,NDC80,AURKB,KIF2C
GO: Biological Process	GO:0051299	centrosome separation			1.53e-06	0.00424	2.79e-05	0.000237	4	15	CHEK1,AURKA,NEK2,KIF11
GO: Biological Process	GO:0048609	multicellular organismal reproductive process			1.6e-06	0.00443	2.89e-05	0.000246	20	996	KIF18A,BRIP1,CLGN,CENPE,BRINP1,NCAPH,TTK,SUV39H2,CCNB1,AURKA,HOXA11,HMGA2,FBXO5,NDC80,ADGRG2,CCNB2,ASPM,HAS2,CDC25C,TOP2A
GO: Biological Process	GO:0045859	regulation of protein kinase activity			1.73e-06	0.00479	3.11e-05	0.000265	19	911	CDKN3,CENPE,PBK,EZH2,EDN3,CCNA2,CCNB1,CDK5R1,HMGA2,NRXN1,CCNB2,CCNE2,TPX2,KIF14,FZD10,CDK1,CDC6,CDC25A,CDC25C
GO: Biological Process	GO:0007276	gamete generation			1.75e-06	0.00484	3.12e-05	0.000266	18	824	KIF18A,BRIP1,CLGN,CENPE,NCAPH,TTK,SUV39H2,CCNB1,AURKA,HOXA11,HMGA2,FBXO5,NDC80,ADGRG2,CCNB2,ASPM,CDC25C,TOP2A
GO: Biological Process	GO:0019953	sexual reproduction			2.04e-06	0.00565	3.62e-05	0.000308	20	1012	KIF18A,BRIP1,CLGN,CENPE,NCAPH,TTK,SUV39H2,CCNB1,AURKA,HOXA11,HMGA2,FBXO5,NDC80,ADGRG2,HOXD11,CCNB2,ASPM,CDK1,CDC25C,TOP2A
GO: Biological Process	GO:0032504	multicellular organism reproduction			2.17e-06	0.006	3.82e-05	0.000325	20	1016	KIF18A,BRIP1,CLGN,CENPE,BRINP1,NCAPH,TTK,SUV39H2,CCNB1,AURKA,HOXA11,HMGA2,FBXO5,NDC80,ADGRG2,CCNB2,ASPM,HAS2,CDC25C,TOP2A
GO: Biological Process	GO:0019886	antigen processing and presentation of exogenous peptide antigen via MHC class II			2.21e-06	0.00611	3.87e-05	0.000329	7	100	KIF18A,KIF23,CENPE,KIF4A,KIF15,KIF11,KIF2C
GO: Biological Process	GO:0001656	metanephros development	1		2.36e-06	0.00654	4.11e-05	0.00035	7	101	ITGA8,CITED1,EYA1,HOXA11,SALL1,HOXD11,SIX2
GO: Biological Process	GO:0048333	mesodermal cell differentiation	1		2.54e-06	0.00702	4.39e-05	0.000373	5	37	ITGA8,EYA1,HOXA11,HMGA2,SIX2
GO: Biological Process	GO:0001658	branching involved in ureteric bud morphogenesis			2.62e-06	0.00726	4.51e-05	0.000383	6	66	CITED1,EYA1,HOXA11,SALL1,HOXD11,SIX2
GO: Biological Process	GO:0090231	regulation of spindle checkpoint			2.65e-06	0.00733	4.52e-05	0.000385	4	17	CCNB1,AURKA,NDC80,MAD2L1
GO: Biological Process	GO:0051785	positive regulation of nuclear division			2.87e-06	0.00793	4.77e-05	0.000406	6	67	NUSAP1,CENPE,DLGAP5,EDN3,AURKA,FBXO5
GO: Biological Process	GO:0031023	microtubule organizing center organization			2.88e-06	0.00795	4.77e-05	0.000406	8	148	PCLAF,CHEK1,AURKA,NEK2,NDC80,CDK1,PLK4,KIF11
GO: Biological Process	GO:0002495	antigen processing and presentation of peptide antigen via MHC class II			2.88e-06	0.00796	4.77e-05	0.000406	7	104	KIF18A,KIF23,CENPE,KIF4A,KIF15,KIF11,KIF2C
GO: Biological Process	GO:0045132	meiotic chromosome segregation			2.88e-06	0.00796	4.77e-05	0.000406	7	104	BRIP1,NCAPH,TTK,CCNE2,BUB1,BUB1B,TOP2A
GO: Biological Process	GO:0051347	positive regulation of transferase activity			2.88e-06	0.00797	4.77e-05	0.000406	17	767	CENPE,UBE2C,PBK,EZH2,EDN3,CCNB1,NEK2,CDK5R1,HMGA2,NRXN1,TPX2,KIF14,FZD10,CDK1,CDC6,CDC20,AURKB
GO: Biological Process	GO:0061640	cytoskeleton-dependent cytokinesis			3.07e-06	0.00848	5.02e-05	0.000427	7	105	NUSAP1,KIF23,KIF4A,BIRC5,CEP55,KIF20A,AURKB
GO: Biological Process	GO:0002504	antigen processing and presentation of peptide or polysaccharide antigen via MHC class II			3.07e-06	0.00848	5.02e-05	0.000427	7	105	KIF18A,KIF23,CENPE,KIF4A,KIF15,KIF11,KIF2C
GO: Biological Process	GO:0022412	cellular process involved in reproduction in multicellular organism			3.24e-06	0.00895	5.27e-05	0.000448	13	456	KIF18A,BRIP1,CENPE,NCAPH,TTK,SUV39H2,CCNB1,AURKA,FBXO5,NDC80,CCNB2,ASPM,TOP2A
GO: Biological Process	GO:0042127	regulation of cell population proliferation			3.29e-06	0.0091	5.32e-05	0.000452	29	1973	FOXM1,MYCN,SOX11,CDKN3,BRIP1,BIRC5,CITED1,CHEK1,EYA1,PRC1,EZH2,TTK,EDN3,CCNA2,CCNB1,HMGA2,SALL1,FBXO5,VASH2,ASPM,KIF14,PLAG1,CDK1,HAS2,CDC6,CDC20,CDC25A,PRAME,SIX2
GO: Biological Process	GO:0048704	embryonic skeletal system morphogenesis			3.7e-06	0.0102	5.95e-05	0.000506	7	108	COL2A1,MYCN,SOX11,EYA1,HOXA11,HOXD11,SIX2
GO: Biological Process	GO:0051656	establishment of organelle localization			3.87e-06	0.0107	6.19e-05	0.000526	18	872	NUSAP1,KIF18A,KIF23,CENPE,CENPF,DLGAP5,BIRC5,EYA1,CCNB1,CEP55,NEK2,NDC80,KIF14,CDK1,PLK4,MAD2L1,AURKB,KIF2C
GO: Biological Process	GO:0034501	protein localization to kinetochore			4.27e-06	0.0118	6.79e-05	0.000578	4	19	TTK,NDC80,CDK1,AURKB
GO: Biological Process	GO:0000077	DNA damage checkpoint signaling			4.67e-06	0.0129	7.39e-05	0.000628	8	158	BRIP1,DTL,CHEK1,CCNB1,AURKA,HMGA2,CDK1,CDC25C
GO: Biological Process	GO:0060675	ureteric bud morphogenesis			5.15e-06	0.0142	8.09e-05	0.000688	6	74	CITED1,EYA1,HOXA11,SALL1,HOXD11,SIX2
GO: Biological Process	GO:0001655	urogenital system development	1		5.48e-06	0.0152	8.57e-05	0.000729	12	406	SOX11,CENPF,ITGA8,CITED1,EYA1,HOXA11,SALL1,HOXD11,PLAG1,HAS2,SIX2,HELLS
GO: Biological Process	GO:0072171	mesonephric tubule morphogenesis	1		5.57e-06	0.0154	8.65e-05	0.000735	6	75	CITED1,EYA1,HOXA11,SALL1,HOXD11,SIX2
GO: Biological Process	GO:1902750	negative regulation of cell cycle G2/M phase transition			5.62e-06	0.0156	8.69e-05	0.000739	7	115	DTL,CHEK1,AURKA,HMGA2,CDK1,CDC6,AURKB
GO: Biological Process	GO:0000281	mitotic cytokinesis			6.01e-06	0.0166	9.24e-05	0.000786	6	76	NUSAP1,KIF23,KIF4A,BIRC5,CEP55,KIF20A
GO: Biological Process	GO:0051987	positive regulation of attachment of spindle microtubules to kinetochore			7.02e-06	0.0194	0.000107	0.000912	3	7	CENPE,CCNB1,AURKB
GO: Biological Process	GO:0051383	kinetochore organization			7.96e-06	0.022	0.000121	0.00103	4	22	CENPE,CENPF,DLGAP5,NDC80
GO: Biological Process	GO:0043549	regulation of kinase activity			8.15e-06	0.0226	0.000123	0.00105	19	1014	CDKN3,CENPE,PBK,EZH2,EDN3,CCNA2,CCNB1,CDK5R1,HMGA2,NRXN1,CCNB2,CCNE2,TPX2,KIF14,FZD10,CDK1,CDC6,CDC25A,CDC25C
GO: Biological Process	GO:0045840	positive regulation of mitotic nuclear division			9.47e-06	0.0262	0.000142	0.00121	5	48	NUSAP1,CENPE,DLGAP5,EDN3,AURKA
GO: Biological Process	GO:0072078	nephron tubule morphogenesis	1		1e-05	0.0278	0.00015	0.00128	6	83	CITED1,EYA1,HOXA11,SALL1,HOXD11,SIX2
GO: Biological Process	GO:0016321	female meiosis chromosome segregation			1.12e-05	0.0309	0.000166	0.00141	3	8	NCAPH,TTK,TOP2A
GO: Biological Process	GO:0072088	nephron epithelium morphogenesis			1.15e-05	0.0319	0.00017	0.00145	6	85	CITED1,EYA1,HOXA11,SALL1,HOXD11,SIX2
GO: Biological Process	GO:0031109	microtubule polymerization or depolymerization			1.32e-05	0.0366	0.000195	0.00166	7	131	KIF18A,CDK5R1,FBXO5,TPX2,KIF14,KIF18B,KIF2C
GO: Biological Process	GO:0060284	regulation of cell development	1		1.39e-05	0.0385	0.000204	0.00173	14	603	MYCN,SOX11,BRINP1,CHD7,EZH2,AURKA,HOXA11,CDK5R1,HMGA2,HOXD11,ASPM,KIF14,PLAG1,HAS2
GO: Biological Process	GO:0061333	renal tubule morphogenesis	1		1.41e-05	0.0389	0.000204	0.00173	6	88	CITED1,EYA1,HOXA11,SALL1,HOXD11,SIX2
GO: Biological Process	GO:0072028	nephron morphogenesis			1.41e-05	0.0389	0.000204	0.00173	6	88	CITED1,EYA1,HOXA11,SALL1,HOXD11,SIX2
GO: Biological Process	GO:1901796	regulation of signal transduction by p53 class mediator			1.61e-05	0.0444	0.000231	0.00197	8	187	BRIP1,CHEK1,AURKA,CDK5R1,TPX2,EXO1,DNA2,AURKB
GO: Biological Process	GO:0046602	regulation of mitotic centrosome separation			1.67e-05	0.0462	0.000238	0.00203	3	9	CHEK1,NEK2,KIF11
GO: Biological Process	GO:1901993	regulation of meiotic cell cycle phase transition			1.67e-05	0.0462	0.000238	0.00203	3	9	TTK,CDC25A,CDC25C
GO: Biological Process	GO:0042770	signal transduction in response to DNA damage			1.69e-05	0.0468	0.00024	0.00204	7	136	FOXM1,DTL,CHEK1,CCNB1,AURKA,CDK1,CDC25C
GO: Biological Process	GO:1904666	regulation of ubiquitin protein ligase activity			1.87e-05	0.0516	0.000263	0.00224	4	27	UBE2C,FBXO5,CDC20,MAD2L1
GO: Biological Process	GO:0065004	protein-DNA complex assembly			1.98e-05	0.0547	0.000277	0.00235	10	317	CENPE,CENPF,DLGAP5,HJURP,CENPU,MCM2,OIP5,NEK2,AURKB,HELLS
GO: Biological Process	GO:0001763	morphogenesis of a branching structure			1.98e-05	0.0548	0.000277	0.00235	9	252	MYCN,COL13A1,CITED1,EYA1,HOXA11,HMGA2,SALL1,HOXD11,SIX2
GO: Biological Process	GO:0007019	microtubule depolymerization			2.03e-05	0.0563	0.000283	0.0024	5	56	KIF18A,TPX2,KIF14,KIF18B,KIF2C
GO: Biological Process	GO:0031399	regulation of protein modification process			2.07e-05	0.0573	0.000287	0.00244	26	1825	CDKN3,CENPE,UBE2C,PBK,CHEK1,EZH2,TTK,EDN3,CCNA2,CCNB1,CDK5R1,HMGA2,FBXO5,NRXN1,CCNB2,CCNE2,FANCI,TPX2,KIF14,FZD10,CDK1,CDC6,CDC20,CDC25A,CDC25C,MAD2L1
GO: Biological Process	GO:0048754	branching morphogenesis of an epithelial tube			2.25e-05	0.0623	0.00031	0.00264	8	196	MYCN,CITED1,EYA1,HOXA11,HMGA2,SALL1,HOXD11,SIX2
GO: Biological Process	GO:0048706	embryonic skeletal system development			2.34e-05	0.0647	0.00032	0.00272	7	143	COL2A1,MYCN,SOX11,EYA1,HOXA11,HOXD11,SIX2
GO: Biological Process	GO:0048705	skeletal system morphogenesis			2.38e-05	0.066	0.000325	0.00276	9	258	COL2A1,MYCN,SOX11,COL13A1,EYA1,HOXA11,HOXD11,HAS2,SIX2
GO: Biological Process	GO:0051653	spindle localization			2.42e-05	0.0669	0.000328	0.00279	5	58	NUSAP1,EYA1,NDC80,ASPM,MAD2L1
GO: Biological Process	GO:0044703	multi-organism reproductive process			2.53e-05	0.0699	0.000341	0.0029	20	1200	KIF18A,BRIP1,CLGN,CENPE,NCAPH,TTK,SUV39H2,CCNB1,AURKA,HOXA11,HMGA2,FBXO5,NDC80,ADGRG2,HOXD11,CCNB2,ASPM,CDK1,CDC25C,TOP2A
GO: Biological Process	GO:0072080	nephron tubule development			3.45e-05	0.0955	0.000464	0.00394	6	103	CITED1,EYA1,HOXA11,SALL1,HOXD11,SIX2
GO: Biological Process	GO:0099607	lateral attachment of mitotic spindle microtubules to kinetochore			3.52e-05	0.0973	0.00047	0.004	2	2	CENPE,AURKB
GO: Biological Process	GO:0010972	negative regulation of G2/M transition of mitotic cell cycle			3.65e-05	0.101	0.000485	0.00412	6	104	CHEK1,AURKA,HMGA2,CDK1,CDC6,AURKB
GO: Biological Process	GO:0006302	double-strand break repair			3.71e-05	0.103	0.000491	0.00418	9	273	FOXM1,BRIP1,MCM2,CHEK1,EYA1,HMGA2,GINS2,PARPBP,DNA2
GO: Biological Process	GO:0001822	kidney development			4.26e-05	0.118	0.000561	0.00477	10	347	SOX11,CENPF,ITGA8,CITED1,EYA1,HOXA11,SALL1,HOXD11,HAS2,SIX2
GO: Biological Process	GO:0061326	renal tubule development			4.28e-05	0.118	0.000561	0.00477	6	107	CITED1,EYA1,HOXA11,SALL1,HOXD11,SIX2
GO: Biological Process	GO:0007077	mitotic nuclear membrane disassembly			4.32e-05	0.119	0.000563	0.00479	3	12	CCNB1,CCNB2,CDK1
GO: Biological Process	GO:0060993	kidney morphogenesis			4.51e-05	0.125	0.000586	0.00498	6	108	CITED1,EYA1,HOXA11,SALL1,HOXD11,SIX2
GO: Biological Process	GO:0006325	chromatin organization			4.75e-05	0.131	0.000614	0.00522	16	857	HJURP,CENPU,MCM2,OIP5,CHD7,CHEK1,EYA1,EZH2,SUV39H2,CCNA2,CCNB1,AURKA,HMGA2,CDK1,AURKB,HELLS
GO: Biological Process	GO:0001657	ureteric bud development			5e-05	0.138	0.000643	0.00547	6	110	CITED1,EYA1,HOXA11,SALL1,HOXD11,SIX2
GO: Biological Process	GO:0044786	cell cycle DNA replication			5.24e-05	0.145	0.000667	0.00567	5	68	POLE2,MCM2,GINS1,FBXO5,DNA2
GO: Biological Process	GO:0072164	mesonephric tubule development			5.26e-05	0.146	0.000667	0.00567	6	111	CITED1,EYA1,HOXA11,SALL1,HOXD11,SIX2
GO: Biological Process	GO:0072163	mesonephric epithelium development			5.26e-05	0.146	0.000667	0.00567	6	111	CITED1,EYA1,HOXA11,SALL1,HOXD11,SIX2
GO: Biological Process	GO:0071902	positive regulation of protein serine/threonine kinase activity			5.28e-05	0.146	0.000667	0.00567	10	356	PBK,EZH2,EDN3,CCNB1,CDK5R1,HMGA2,NRXN1,FZD10,CDK1,CDC6
GO: Biological Process	GO:0051642	centrosome localization			5.37e-05	0.148	0.000672	0.00571	4	35	DLGAP5,AURKA,ASPM,MAD2L1
GO: Biological Process	GO:1901976	regulation of cell cycle checkpoint			5.37e-05	0.148	0.000672	0.00571	4	35	CCNB1,AURKA,NDC80,MAD2L1
GO: Biological Process	GO:0007501	mesodermal cell fate specification			5.59e-05	0.155	0.00069	0.00587	3	13	EYA1,HOXA11,SIX2
GO: Biological Process	GO:0060272	embryonic skeletal joint morphogenesis			5.59e-05	0.155	0.00069	0.00587	3	13	COL2A1,HOXA11,HOXD11
GO: Biological Process	GO:0003337	mesenchymal to epithelial transition involved in metanephros morphogenesis			5.59e-05	0.155	0.00069	0.00587	3	13	CITED1,SALL1,SIX2
GO: Biological Process	GO:0072001	renal system development			5.8e-05	0.16	0.000712	0.00605	10	360	SOX11,CENPF,ITGA8,CITED1,EYA1,HOXA11,SALL1,HOXD11,HAS2,SIX2
GO: Biological Process	GO:0044774	mitotic DNA integrity checkpoint signaling			5.81e-05	0.161	0.000712	0.00605	6	113	CCNB1,AURKA,HMGA2,CDK1,CDC6,CDC25C
GO: Biological Process	GO:0071824	protein-DNA complex subunit organization			5.94e-05	0.164	0.000723	0.00615	10	361	CENPE,CENPF,DLGAP5,HJURP,CENPU,MCM2,OIP5,NEK2,AURKB,HELLS
GO: Biological Process	GO:0040007	growth			6e-05	0.166	0.000726	0.00617	19	1172	PLAAT1,CHD7,CHEK1,EZH2,GINS1,CHRNA1,CCNB1,AURKA,HOXA11,CDK5R1,HMGA2,SALL1,HOXD11,CCNB2,ASPM,KIF14,PLAG1,CDK1,PRAME
GO: Biological Process	GO:0061842	microtubule organizing center localization			6.01e-05	0.166	0.000726	0.00617	4	36	DLGAP5,AURKA,ASPM,MAD2L1
GO: Biological Process	GO:0001823	mesonephros development			6.41e-05	0.177	0.000771	0.00656	6	115	CITED1,EYA1,HOXA11,SALL1,HOXD11,SIX2
GO: Biological Process	GO:0040001	establishment of mitotic spindle localization			6.71e-05	0.186	0.000803	0.00683	4	37	NUSAP1,EYA1,NDC80,MAD2L1
GO: Biological Process	GO:0043161	proteasome-mediated ubiquitin-dependent protein catabolic process			7.01e-05	0.194	0.000836	0.00711	11	445	UBE2C,PBK,CCNB1,AURKA,FBXO5,BUB1B,KIF14,CDK1,CDC20,MAD2L1,AURKB
GO: Biological Process	GO:0045860	positive regulation of protein kinase activity			7.26e-05	0.201	0.000862	0.00733	13	613	CENPE,PBK,EZH2,EDN3,CCNB1,CDK5R1,HMGA2,NRXN1,TPX2,KIF14,FZD10,CDK1,CDC6
GO: Biological Process	GO:0051704	multi-organism process			7.51e-05	0.208	0.000887	0.00754	20	1297	KIF18A,BRIP1,CLGN,CENPE,NCAPH,TTK,SUV39H2,CCNB1,AURKA,HOXA11,HMGA2,FBXO5,NDC80,ADGRG2,HOXD11,CCNB2,ASPM,CDK1,CDC25C,TOP2A
GO: Biological Process	GO:0048608	reproductive structure development			7.54e-05	0.209	0.000887	0.00754	12	530	KIF18A,BRIP1,PEG10,CITED1,CHD7,HOXA11,HMGA2,SALL1,VASH2,ASPM,PLAG1,PLK4
GO: Biological Process	GO:0007018	microtubule-based movement			7.64e-05	0.211	0.000895	0.00761	14	705	KIF18A,KIF23,CENPE,DLGAP5,KIF4A,KIF20A,NEK2,KIF15,KIF14,CDK1,KIF18B,PLK4,KIF11,KIF2C
GO: Biological Process	GO:0061138	morphogenesis of a branching epithelium			7.67e-05	0.212	0.000895	0.00761	8	233	MYCN,CITED1,EYA1,HOXA11,HMGA2,SALL1,HOXD11,SIX2
GO: Biological Process	GO:0061458	reproductive system development			8.24e-05	0.228	0.000957	0.00814	12	535	KIF18A,BRIP1,PEG10,CITED1,CHD7,HOXA11,HMGA2,SALL1,VASH2,ASPM,PLAG1,PLK4
GO: Biological Process	GO:0051094	positive regulation of developmental process			8.4e-05	0.232	0.000973	0.00827	22	1525	SOX11,BRINP1,CHD7,EZH2,EDN3,CCNB1,AURKA,HOXA11,HMGA2,SALL1,FBXO5,NRXN1,HOXD11,VASH2,LRRTM2,ASPM,ELAVL4,PLAG1,CDK1,HAS2,CDC20,TMEM100
GO: Biological Process	GO:0035295	tube development			8.61e-05	0.238	0.000993	0.00844	20	1310	COL2A1,FOXM1,MYCN,SOX11,KIF18A,BRIP1,CITED1,CHD7,EYA1,CCNB1,HOXA11,HMGA2,SALL1,NRXN1,HOXD11,VASH2,HAS2,TMEM100,SIX2,NPY
GO: Biological Process	GO:0035107	appendage morphogenesis			8.76e-05	0.242	0.000995	0.00846	7	176	COL2A1,MYCN,SOX11,CHD7,HOXA11,SALL1,HOXD11
GO: Biological Process	GO:0035108	limb morphogenesis			8.76e-05	0.242	0.000995	0.00846	7	176	COL2A1,MYCN,SOX11,CHD7,HOXA11,SALL1,HOXD11
GO: Biological Process	GO:0007076	mitotic chromosome condensation			8.81e-05	0.244	0.000995	0.00846	3	15	NUSAP1,NCAPH,NCAPG
GO: Biological Process	GO:1903504	regulation of mitotic spindle checkpoint			8.81e-05	0.244	0.000995	0.00846	3	15	CCNB1,NDC80,MAD2L1
GO: Biological Process	GO:0090266	regulation of mitotic cell cycle spindle assembly checkpoint			8.81e-05	0.244	0.000995	0.00846	3	15	CCNB1,NDC80,MAD2L1
GO: Biological Process	GO:0032506	cytokinetic process			9.15e-05	0.253	0.00103	0.00875	4	40	KIF23,CEP55,KIF20A,AURKB
GO: Biological Process	GO:0072009	nephron epithelium development			9.32e-05	0.258	0.00104	0.00887	6	123	CITED1,EYA1,HOXA11,SALL1,HOXD11,SIX2
GO: Biological Process	GO:0002478	antigen processing and presentation of exogenous peptide antigen			9.41e-05	0.26	0.00105	0.00892	7	178	KIF18A,KIF23,CENPE,KIF4A,KIF15,KIF11,KIF2C
GO: Biological Process	GO:0048589	developmental growth			9.91e-05	0.274	0.0011	0.00936	15	816	CHD7,CHEK1,EZH2,GINS1,CHRNA1,CCNB1,AURKA,HOXA11,CDK5R1,HMGA2,SALL1,HOXD11,ASPM,PLAG1,CDK1
GO: Biological Process	GO:0044818	mitotic G2/M transition checkpoint			0.000101	0.279	0.00112	0.00949	4	41	CHEK1,HMGA2,CDK1,CDC6
GO: Biological Process	GO:0070192	chromosome organization involved in meiotic cell cycle			0.000101	0.28	0.00112	0.00949	5	78	BRIP1,NCAPH,CCNE2,BUB1,BUB1B
GO: Biological Process	GO:0051960	regulation of nervous system development			0.000103	0.286	0.00113	0.00963	12	548	MYCN,SOX11,BRINP1,CHD7,EZH2,CDK5R1,HMGA2,NRXN1,LRRTM2,ASPM,KIF14,PLAG1
GO: Biological Process	GO:0110030	regulation of G2/MI transition of meiotic cell cycle			0.000105	0.289	0.00113	0.00963	2	3	CDC25A,CDC25C
GO: Biological Process	GO:0110032	positive regulation of G2/MI transition of meiotic cell cycle			0.000105	0.289	0.00113	0.00963	2	3	CDC25A,CDC25C
GO: Biological Process	GO:1905463	negative regulation of DNA duplex unwinding			0.000105	0.289	0.00113	0.00963	2	3	MCM2,TOP2A
GO: Biological Process	GO:0072283	metanephric renal vesicle morphogenesis			0.000108	0.299	0.00116	0.00985	3	16	CITED1,SALL1,SIX2
GO: Biological Process	GO:0030397	membrane disassembly			0.000108	0.299	0.00116	0.00985	3	16	CCNB1,CCNB2,CDK1
GO: Biological Process	GO:0051081	nuclear membrane disassembly			0.000108	0.299	0.00116	0.00985	3	16	CCNB1,CCNB2,CDK1
GO: Biological Process	GO:0032467	positive regulation of cytokinesis			0.000111	0.307	0.00119	0.0101	4	42	KIF23,KIF14,CDC6,AURKB
GO: Biological Process	GO:0019884	antigen processing and presentation of exogenous antigen			0.000124	0.342	0.00132	0.0112	7	186	KIF18A,KIF23,CENPE,KIF4A,KIF15,KIF11,KIF2C
GO: Biological Process	GO:0051382	kinetochore assembly			0.000131	0.361	0.00138	0.0117	3	17	CENPE,CENPF,DLGAP5
GO: Biological Process	GO:0072498	embryonic skeletal joint development			0.000131	0.361	0.00138	0.0117	3	17	COL2A1,HOXA11,HOXD11
GO: Biological Process	GO:0001932	regulation of protein phosphorylation			0.000146	0.404	0.00154	0.0131	20	1362	CDKN3,CENPE,PBK,EZH2,TTK,EDN3,CCNA2,CCNB1,CDK5R1,HMGA2,NRXN1,CCNB2,CCNE2,TPX2,KIF14,FZD10,CDK1,CDC6,CDC25A,CDC25C
GO: Biological Process	GO:2000045	regulation of G1/S transition of mitotic cell cycle			0.000151	0.417	0.00158	0.0134	7	192	EZH2,CCNB1,AURKA,KIF14,CDK1,CDC6,CDC25C
GO: Biological Process	GO:0043583	ear development			0.000151	0.418	0.00158	0.0134	8	257	COL2A1,MYCN,ITGA8,MCM2,CHD7,EYA1,CCNA2,SIX2
GO: Biological Process	GO:0003006	developmental process involved in reproduction			0.000157	0.435	0.00164	0.0139	18	1155	KIF18A,BRIP1,CLGN,PEG10,CITED1,CHD7,CCNB1,AURKA,HOXA11,HMGA2,SALL1,FBXO5,ADGRG2,VASH2,ASPM,PLAG1,CDC25C,PLK4
GO: Biological Process	GO:0043085	positive regulation of catalytic activity			0.000168	0.466	0.00174	0.0148	22	1600	CENPE,UBE2C,PBK,DEPDC1,ARHGAP11A,EZH2,NCAPH,RGS7,EDN3,CCNB1,NEK2,CDK5R1,HMGA2,NRXN1,TPX2,KIF14,FZD10,RGS17,CDK1,CDC6,CDC20,AURKB
GO: Biological Process	GO:0048002	antigen processing and presentation of peptide antigen			0.000171	0.473	0.00177	0.015	7	196	KIF18A,KIF23,CENPE,KIF4A,KIF15,KIF11,KIF2C
GO: Biological Process	GO:0018105	peptidyl-serine phosphorylation			0.000181	0.5	0.00186	0.0158	9	336	PBK,TTK,CCNB1,AURKA,CDK5R1,HMGA2,NRXN1,CDK1,AURKB
GO: Biological Process	GO:0006271	DNA strand elongation involved in DNA replication			0.000185	0.51	0.00188	0.016	3	19	GINS1,GINS2,DNA2
GO: Biological Process	GO:0090592	DNA synthesis involved in DNA replication			0.000185	0.51	0.00188	0.016	3	19	GINS1,GINS2,DNA2
GO: Biological Process	GO:0072077	renal vesicle morphogenesis			0.000185	0.51	0.00188	0.016	3	19	CITED1,SALL1,SIX2
GO: Biological Process	GO:0031055	chromatin remodeling at centromere			0.000188	0.52	0.0019	0.0162	4	48	HJURP,CENPU,OIP5,HELLS
GO: Biological Process	GO:0007079	mitotic chromosome movement towards spindle pole			0.000208	0.576	0.00207	0.0176	2	4	CENPE,DLGAP5
GO: Biological Process	GO:0051309	female meiosis chromosome separation			0.000208	0.576	0.00207	0.0176	2	4	NCAPH,TOP2A
GO: Biological Process	GO:0003340	negative regulation of mesenchymal to epithelial transition involved in metanephros morphogenesis			0.000208	0.576	0.00207	0.0176	2	4	CITED1,SALL1
GO: Biological Process	GO:1905448	positive regulation of mitochondrial ATP synthesis coupled electron transport			0.000208	0.576	0.00207	0.0176	2	4	CCNB1,CDK1
GO: Biological Process	GO:0021553	olfactory nerve development			0.000208	0.576	0.00207	0.0176	2	4	CHD7,SALL1
GO: Biological Process	GO:0033674	positive regulation of kinase activity			0.000209	0.578	0.00207	0.0176	13	682	CENPE,PBK,EZH2,EDN3,CCNB1,CDK5R1,HMGA2,NRXN1,TPX2,KIF14,FZD10,CDK1,CDC6
GO: Biological Process	GO:0048562	embryonic organ morphogenesis			0.000211	0.583	0.00208	0.0177	9	343	COL2A1,MYCN,SOX11,ITGA8,CHD7,EYA1,HOXA11,HOXD11,SIX2
GO: Biological Process	GO:0001710	mesodermal cell fate commitment			0.000216	0.598	0.00213	0.0181	3	20	EYA1,HOXA11,SIX2
GO: Biological Process	GO:2000026	regulation of multicellular organismal development			0.000223	0.617	0.00219	0.0186	22	1632	MYCN,SOX11,CITED1,BRINP1,CHD7,EZH2,CCNB1,HOXA11,CDK5R1,HMGA2,SALL1,FBXO5,NRXN1,HOXD11,VASH2,LRRTM2,ASPM,KIF14,PLAG1,CDK1,TMEM100,SIX2
GO: Biological Process	GO:0010498	proteasomal protein catabolic process			0.000224	0.618	0.00219	0.0186	11	508	UBE2C,PBK,CCNB1,AURKA,FBXO5,BUB1B,KIF14,CDK1,CDC20,MAD2L1,AURKB
GO: Biological Process	GO:0016569	covalent chromatin modification			0.000227	0.629	0.00221	0.0188	11	509	CHEK1,EYA1,EZH2,SUV39H2,CCNA2,CCNB1,AURKA,HMGA2,CDK1,AURKB,HELLS
GO: Biological Process	GO:0060173	limb development			0.000246	0.681	0.00238	0.0202	7	208	COL2A1,MYCN,SOX11,CHD7,HOXA11,SALL1,HOXD11
GO: Biological Process	GO:0048736	appendage development			0.000246	0.681	0.00238	0.0202	7	208	COL2A1,MYCN,SOX11,CHD7,HOXA11,SALL1,HOXD11
GO: Biological Process	GO:0060231	mesenchymal to epithelial transition			0.000251	0.694	0.00241	0.0205	3	21	CITED1,SALL1,SIX2
GO: Biological Process	GO:0072087	renal vesicle development			0.000251	0.694	0.00241	0.0205	3	21	CITED1,SALL1,SIX2
GO: Biological Process	GO:2000241	regulation of reproductive process			0.000261	0.722	0.0025	0.0212	7	210	TTK,AURKA,FBXO5,ASPM,CDC20,CDC25A,CDC25C
GO: Biological Process	GO:0051293	establishment of spindle localization			0.000276	0.764	0.00264	0.0224	4	53	NUSAP1,EYA1,NDC80,MAD2L1
GO: Biological Process	GO:0018209	peptidyl-serine modification			0.000301	0.832	0.00285	0.0242	9	360	PBK,TTK,CCNB1,AURKA,CDK5R1,HMGA2,NRXN1,CDK1,AURKB
GO: Biological Process	GO:0001701	in utero embryonic development			0.000301	0.833	0.00285	0.0242	11	526	CITED1,CHD7,CHEK1,RRM2,GINS1,CCNB1,NEK2,CCNB2,VASH2,TMEM100,PLK4
GO: Biological Process	GO:1902806	regulation of cell cycle G1/S phase transition			0.000318	0.88	0.003	0.0255	7	217	EZH2,CCNB1,AURKA,KIF14,CDK1,CDC6,CDC25C
GO: Biological Process	GO:0060322	head development			0.000323	0.893	0.00304	0.0258	15	910	COL2A1,CENPF,ITGA8,CITED1,CHD7,EZH2,CDK5R1,HMGA2,SALL1,NRXN1,UNC5C,ASPM,KIF14,ELAVL4,NPY
GO: Biological Process	GO:0051754	meiotic sister chromatid cohesion, centromeric			0.000346	0.956	0.00323	0.0275	2	5	BUB1,BUB1B
GO: Biological Process	GO:1901995	positive regulation of meiotic cell cycle phase transition			0.000346	0.956	0.00323	0.0275	2	5	CDC25A,CDC25C
GO: Biological Process	GO:0006977	DNA damage response, signal transduction by p53 class mediator resulting in cell cycle arrest			0.000366	1	0.00341	0.029	4	57	CCNB1,AURKA,CDK1,CDC25C
GO: Biological Process	GO:0072073	kidney epithelium development			0.000376	1	0.00349	0.0297	6	159	CITED1,EYA1,HOXA11,SALL1,HOXD11,SIX2
GO: Biological Process	GO:0009411	response to UV			0.000416	1	0.00385	0.0327	6	162	PCLAF,DTL,PBK,CHEK1,CDC25A,AURKB
GO: Biological Process	GO:0006338	chromatin remodeling			0.000417	1	0.00385	0.0327	7	227	HJURP,CENPU,OIP5,CHD7,SUV39H2,HMGA2,HELLS
GO: Biological Process	GO:0048839	inner ear development			0.000429	1	0.00394	0.0335	7	228	COL2A1,MYCN,ITGA8,MCM2,CHD7,EYA1,CCNA2
GO: Biological Process	GO:0006333	chromatin assembly or disassembly			0.00044	1	0.00403	0.0343	7	229	HJURP,CENPU,MCM2,OIP5,SUV39H2,HMGA2,HELLS
GO: Biological Process	GO:0032508	DNA duplex unwinding			0.000445	1	0.00406	0.0345	5	107	BRIP1,MCM2,CHD7,DNA2,TOP2A
GO: Biological Process	GO:0051438	regulation of ubiquitin-protein transferase activity			0.000446	1	0.00406	0.0345	4	60	UBE2C,FBXO5,CDC20,MAD2L1
GO: Biological Process	GO:0072006	nephron development			0.000473	1	0.00429	0.0365	6	166	CITED1,EYA1,HOXA11,SALL1,HOXD11,SIX2
GO: Biological Process	GO:0022616	DNA strand elongation			0.00048	1	0.00431	0.0367	3	26	GINS1,GINS2,DNA2
GO: Biological Process	GO:0072202	cell differentiation involved in metanephros development			0.00048	1	0.00431	0.0367	3	26	CITED1,SALL1,SIX2
GO: Biological Process	GO:0072273	metanephric nephron morphogenesis			0.00048	1	0.00431	0.0367	3	26	CITED1,SALL1,SIX2
GO: Biological Process	GO:0044773	mitotic DNA damage checkpoint signaling			0.000485	1	0.00434	0.0369	5	109	CCNB1,AURKA,HMGA2,CDK1,CDC25C
GO: Biological Process	GO:0000723	telomere maintenance			0.000488	1	0.00436	0.0371	6	167	POLE2,NEK2,CCNE2,EXO1,DNA2,AURKB
GO: Biological Process	GO:0030330	DNA damage response, signal transduction by p53 class mediator			0.000505	1	0.00448	0.0381	5	110	FOXM1,CCNB1,AURKA,CDK1,CDC25C
GO: Biological Process	GO:0060349	bone morphogenesis			0.000505	1	0.00448	0.0381	5	110	COL2A1,COL13A1,HOXA11,HOXD11,HAS2
GO: Biological Process	GO:2000697	negative regulation of epithelial cell differentiation involved in kidney development			0.000516	1	0.00453	0.0385	2	6	CITED1,SALL1
GO: Biological Process	GO:1905462	regulation of DNA duplex unwinding			0.000516	1	0.00453	0.0385	2	6	MCM2,TOP2A
GO: Biological Process	GO:0031536	positive regulation of exit from mitosis			0.000516	1	0.00453	0.0385	2	6	UBE2C,BIRC5
GO: Biological Process	GO:0033260	nuclear DNA replication			0.000537	1	0.00469	0.0399	4	63	POLE2,MCM2,GINS1,DNA2
GO: Biological Process	GO:0045595	regulation of cell differentiation			0.000538	1	0.00469	0.0399	23	1859	MYCN,SOX11,CITED1,BRINP1,CHD7,EYA1,EZH2,EDN3,AURKA,HOXA11,CDK5R1,HMGA2,SALL1,FBXO5,HOXD11,ASPM,KIF14,PLAG1,CDK1,HAS2,TMEM100,PRAME,SIX2
GO: Biological Process	GO:0007420	brain development			0.000539	1	0.00469	0.0399	14	853	CENPF,ITGA8,CITED1,CHD7,EZH2,CDK5R1,HMGA2,SALL1,NRXN1,UNC5C,ASPM,KIF14,ELAVL4,NPY
GO: Biological Process	GO:0007417	central nervous system development			0.000556	1	0.00482	0.041	17	1172	COL2A1,MYCN,SOX11,CENPF,ITGA8,CITED1,CHD7,EZH2,CDK5R1,HMGA2,SALL1,NRXN1,UNC5C,ASPM,KIF14,ELAVL4,NPY
GO: Biological Process	GO:0006511	ubiquitin-dependent protein catabolic process			0.000594	1	0.0051	0.0434	12	664	UBE2C,DTL,PBK,CCNB1,AURKA,FBXO5,BUB1B,KIF14,CDK1,CDC20,MAD2L1,AURKB
GO: Biological Process	GO:0032392	DNA geometric change			0.000595	1	0.0051	0.0434	5	114	BRIP1,MCM2,CHD7,DNA2,TOP2A
GO: Biological Process	GO:0019882	antigen processing and presentation			0.000596	1	0.0051	0.0434	7	241	KIF18A,KIF23,CENPE,KIF4A,KIF15,KIF11,KIF2C
GO: Biological Process	GO:0045664	regulation of neuron differentiation			0.000596	1	0.0051	0.0434	7	241	MYCN,SOX11,BRINP1,EYA1,CDK5R1,SALL1,ASPM
GO: Biological Process	GO:0051307	meiotic chromosome separation			0.0006	1	0.00512	0.0435	3	28	NCAPH,TTK,TOP2A
GO: Biological Process	GO:0031571	mitotic G1 DNA damage checkpoint signaling			0.000605	1	0.00515	0.0438	4	65	CCNB1,AURKA,CDK1,CDC25C
GO: Biological Process	GO:0006310	DNA recombination			0.000616	1	0.00522	0.0444	8	317	BRIP1,MCM2,CHEK1,EZH2,EXO1,GINS2,PARPBP,TOP2A
GO: Biological Process	GO:0044819	mitotic G1/S transition checkpoint signaling			0.000641	1	0.00542	0.0461	4	66	CCNB1,AURKA,CDK1,CDC25C
GO: Biological Process	GO:0019941	modification-dependent protein catabolic process			0.000643	1	0.00542	0.0461	12	670	UBE2C,DTL,PBK,CCNB1,AURKA,FBXO5,BUB1B,KIF14,CDK1,CDC20,MAD2L1,AURKB
GO: Biological Process	GO:0060350	endochondral bone morphogenesis			0.000679	1	0.00571	0.0485	4	67	COL2A1,COL13A1,HOXA11,HOXD11
GO: Biological Process	GO:0001501	skeletal system development			0.000711	1	0.00594	0.0505	11	583	COL2A1,MYCN,SOX11,COL13A1,CHD7,EYA1,HOXA11,HMGA2,HOXD11,HAS2,SIX2
GO: Biological Process	GO:0051305	chromosome movement towards spindle pole			0.00072	1	0.00594	0.0505	2	7	CENPE,DLGAP5
GO: Biological Process	GO:1905446	regulation of mitochondrial ATP synthesis coupled electron transport			0.00072	1	0.00594	0.0505	2	7	CCNB1,CDK1
GO: Biological Process	GO:0072038	mesenchymal stem cell maintenance involved in nephron morphogenesis			0.00072	1	0.00594	0.0505	2	7	SALL1,SIX2
GO: Biological Process	GO:0090267	positive regulation of mitotic cell cycle spindle assembly checkpoint			0.00072	1	0.00594	0.0505	2	7	NDC80,MAD2L1
GO: Biological Process	GO:0090232	positive regulation of spindle checkpoint			0.00072	1	0.00594	0.0505	2	7	NDC80,MAD2L1
GO: Biological Process	GO:0032200	telomere organization			0.000724	1	0.00596	0.0507	6	180	POLE2,NEK2,CCNE2,EXO1,DNA2,AURKB
GO: Biological Process	GO:0090344	negative regulation of cell aging			0.000737	1	0.00601	0.0511	3	30	FOXM1,HMGA2,FBXO5
GO: Biological Process	GO:2000648	positive regulation of stem cell proliferation			0.000737	1	0.00601	0.0511	3	30	SOX11,CITED1,HMGA2
GO: Biological Process	GO:0031401	positive regulation of protein modification process			0.000739	1	0.00601	0.0511	17	1202	CENPE,UBE2C,PBK,EZH2,TTK,EDN3,CCNB1,CDK5R1,HMGA2,NRXN1,FANCI,TPX2,KIF14,FZD10,CDK1,CDC6,CDC20
GO: Biological Process	GO:0060485	mesenchyme development			0.000739	1	0.00601	0.0511	8	326	SOX11,EZH2,EDN3,MEOX1,HMGA2,HAS2,TMEM100,SIX2
GO: Biological Process	GO:0016570	histone modification			0.000743	1	0.00603	0.0513	10	495	CHEK1,EYA1,EZH2,SUV39H2,CCNA2,CCNB1,AURKA,HMGA2,CDK1,AURKB
GO: Biological Process	GO:0043632	modification-dependent macromolecule catabolic process			0.00075	1	0.00603	0.0513	12	682	UBE2C,DTL,PBK,CCNB1,AURKA,FBXO5,BUB1B,KIF14,CDK1,CDC20,MAD2L1,AURKB
GO: Biological Process	GO:0006275	regulation of DNA replication			0.000751	1	0.00603	0.0513	5	120	CCNA2,FBXO5,CDK1,CDC6,DNA2
GO: Biological Process	GO:0002062	chondrocyte differentiation			0.000751	1	0.00603	0.0513	5	120	COL2A1,HOXA11,HMGA2,HOXD11,SIX2
GO: Biological Process	GO:0060562	epithelial tube morphogenesis			0.000781	1	0.00626	0.0532	9	411	MYCN,SOX11,CITED1,EYA1,HOXA11,HMGA2,SALL1,HOXD11,SIX2
GO: Biological Process	GO:0051446	positive regulation of meiotic cell cycle			0.000812	1	0.0065	0.0552	3	31	FBXO5,CDC25A,CDC25C
GO: Biological Process	GO:0042325	regulation of phosphorylation			0.000829	1	0.00661	0.0562	20	1558	CDKN3,CENPE,PBK,EZH2,TTK,EDN3,CCNA2,CCNB1,CDK5R1,HMGA2,NRXN1,CCNB2,CCNE2,TPX2,KIF14,FZD10,CDK1,CDC6,CDC25A,CDC25C
GO: Biological Process	GO:0048762	mesenchymal cell differentiation			0.00085	1	0.00676	0.0575	7	256	SOX11,EZH2,EDN3,HMGA2,HAS2,TMEM100,SIX2
GO: Biological Process	GO:0048699	generation of neurons			0.000865	1	0.00685	0.0583	22	1802	MYCN,SOX11,TUBB2B,BRINP1,CHD7,EYA1,EZH2,EDN3,AURKA,CDK5R1,HMGA2,SALL1,NRXN1,CNTN5,UNC5C,VASH2,ASPM,FZD10,ELAVL4,PLAG1,CDC20,NPY
GO: Biological Process	GO:0042733	embryonic digit morphogenesis			0.00089	1	0.00701	0.0596	4	72	MYCN,HOXA11,SALL1,HOXD11
GO: Biological Process	GO:0000132	establishment of mitotic spindle orientation			0.000893	1	0.00701	0.0596	3	32	EYA1,NDC80,MAD2L1
GO: Biological Process	GO:0001556	oocyte maturation			0.000893	1	0.00701	0.0596	3	32	CCNB1,AURKA,FBXO5
GO: Biological Process	GO:0007569	cell aging			0.000935	1	0.00733	0.0623	5	126	FOXM1,CHEK1,HMGA2,FBXO5,CDK1
GO: Biological Process	GO:0048752	semicircular canal morphogenesis			0.000956	1	0.00747	0.0635	2	8	CHD7,EYA1
GO: Biological Process	GO:0022008	neurogenesis			0.000968	1	0.00751	0.0638	23	1940	MYCN,SOX11,TUBB2B,BRINP1,CHD7,EYA1,EZH2,EDN3,AURKA,CDK5R1,HMGA2,SALL1,NRXN1,CNTN5,UNC5C,VASH2,ASPM,FZD10,ELAVL4,PLAG1,CDK1,CDC20,NPY
GO: Biological Process	GO:2000134	negative regulation of G1/S transition of mitotic cell cycle			0.000969	1	0.00751	0.0638	5	127	EZH2,CCNB1,AURKA,CDK1,CDC25C
GO: Biological Process	GO:0018107	peptidyl-threonine phosphorylation			0.000969	1	0.00751	0.0638	5	127	PBK,CHEK1,TTK,CDK5R1,CDK1
GO: Biological Process	GO:0003338	metanephros morphogenesis			0.000978	1	0.00755	0.0642	3	33	CITED1,SALL1,SIX2
GO: Biological Process	GO:0071168	protein localization to chromatin			0.000987	1	0.0076	0.0646	4	74	HJURP,CENPU,OIP5,EZH2
GO: Biological Process	GO:0014013	regulation of gliogenesis			0.001	1	0.00771	0.0656	5	128	MYCN,SOX11,EZH2,HMGA2,PLAG1
GO: Biological Process	GO:0045737	positive regulation of cyclin-dependent protein serine/threonine kinase activity			0.00107	1	0.00816	0.0694	3	34	CCNB1,CDK5R1,CDC6
GO: Biological Process	GO:0060795	cell fate commitment involved in formation of primary germ layer			0.00107	1	0.00816	0.0694	3	34	EYA1,HOXA11,SIX2
GO: Biological Process	GO:0000083	regulation of transcription involved in G1/S transition of mitotic cell cycle			0.00116	1	0.00886	0.0753	3	35	RRM2,FBXO5,CDC6
GO: Biological Process	GO:1904667	negative regulation of ubiquitin protein ligase activity			0.00122	1	0.00925	0.0787	2	9	FBXO5,MAD2L1
GO: Biological Process	GO:0003339	regulation of mesenchymal to epithelial transition involved in metanephros morphogenesis			0.00122	1	0.00925	0.0787	2	9	CITED1,SALL1
GO: Biological Process	GO:0097168	mesenchymal stem cell proliferation			0.00122	1	0.00925	0.0787	2	9	CITED1,SIX2
GO: Biological Process	GO:1902807	negative regulation of cell cycle G1/S phase transition			0.00123	1	0.00928	0.0789	5	134	EZH2,CCNB1,AURKA,CDK1,CDC25C
GO: Biological Process	GO:0051261	protein depolymerization			0.00127	1	0.00956	0.0813	5	135	KIF18A,TPX2,KIF14,KIF18B,KIF2C
GO: Biological Process	GO:0031497	chromatin assembly			0.00131	1	0.00983	0.0836	6	202	HJURP,CENPU,MCM2,OIP5,HMGA2,HELLS
GO: Biological Process	GO:0018210	peptidyl-threonine modification			0.00132	1	0.00983	0.0836	5	136	PBK,CHEK1,TTK,CDK5R1,CDK1
GO: Biological Process	GO:0006282	regulation of DNA repair			0.00136	1	0.0101	0.0861	5	137	FOXM1,CHEK1,EYA1,HMGA2,PARPBP
GO: Biological Process	GO:0050767	regulation of neurogenesis			0.0014	1	0.0104	0.0886	9	447	MYCN,SOX11,BRINP1,CHD7,EZH2,CDK5R1,HMGA2,ASPM,PLAG1
GO: Biological Process	GO:0010557	positive regulation of macromolecule biosynthetic process			0.00142	1	0.0105	0.0894	23	1996	FOXM1,MYCN,SOX11,DLGAP5,ITGA8,CITED1,CHD7,CHEK1,EYA1,CCNA2,MEOX1,HOXA11,NEK2,CDK5R1,HMGA2,SALL1,PLAG1,CDK1,HAS2,DNA2,SIX2,TOP2A,AURKB
GO: Biological Process	GO:0001934	positive regulation of protein phosphorylation			0.00146	1	0.0108	0.0918	14	946	CENPE,PBK,EZH2,TTK,EDN3,CCNB1,CDK5R1,HMGA2,NRXN1,TPX2,KIF14,FZD10,CDK1,CDC6
GO: Biological Process	GO:0048566	embryonic digestive tract development			0.00148	1	0.0109	0.0925	3	38	SOX11,SALL1,SIX2
GO: Biological Process	GO:1904031	positive regulation of cyclin-dependent protein kinase activity			0.00148	1	0.0109	0.0925	3	38	CCNB1,CDK5R1,CDC6
GO: Biological Process	GO:0030900	forebrain development			0.00149	1	0.0109	0.093	9	451	CHD7,EZH2,CDK5R1,HMGA2,SALL1,ASPM,KIF14,ELAVL4,NPY
GO: Biological Process	GO:1901978	positive regulation of cell cycle checkpoint			0.00153	1	0.011	0.0939	2	10	NDC80,MAD2L1
GO: Biological Process	GO:0090129	positive regulation of synapse maturation			0.00153	1	0.011	0.0939	2	10	NRXN1,CDC20
GO: Biological Process	GO:0048387	negative regulation of retinoic acid receptor signaling pathway			0.00153	1	0.011	0.0939	2	10	EZH2,PRAME
GO: Biological Process	GO:0060872	semicircular canal development			0.00153	1	0.011	0.0939	2	10	CHD7,EYA1
GO: Biological Process	GO:0036302	atrioventricular canal development			0.00153	1	0.011	0.0939	2	10	CHD7,HAS2
GO: Biological Process	GO:0031100	animal organ regeneration			0.00158	1	0.0114	0.0971	4	84	EZH2,CCNA2,AURKA,CDK1
GO: Biological Process	GO:0051294	establishment of spindle orientation			0.0016	1	0.0114	0.0972	3	39	EYA1,NDC80,MAD2L1
GO: Biological Process	GO:0060351	cartilage development involved in endochondral bone morphogenesis			0.0016	1	0.0114	0.0972	3	39	COL2A1,HOXA11,HOXD11
GO: Biological Process	GO:0007271	synaptic transmission, cholinergic			0.0016	1	0.0114	0.0972	3	39	CHRNA1,CHRNA5,LYPD1
GO: Biological Process	GO:0042471	ear morphogenesis			0.00164	1	0.0117	0.0997	5	143	COL2A1,ITGA8,CHD7,EYA1,SIX2
GO: Biological Process	GO:0035239	tube morphogenesis			0.00165	1	0.0118	0.1	15	1068	FOXM1,MYCN,SOX11,CITED1,CHD7,EYA1,HOXA11,HMGA2,SALL1,NRXN1,HOXD11,VASH2,HAS2,TMEM100,SIX2
GO: Biological Process	GO:0021772	olfactory bulb development			0.00172	1	0.0122	0.104	3	40	CHD7,SALL1,KIF14
GO: Biological Process	GO:0010638	positive regulation of organelle organization			0.00172	1	0.0122	0.104	11	651	NUSAP1,CENPE,DLGAP5,EDN3,CCNB1,AURKA,NEK2,CDK5R1,FBXO5,PLK4,AURKB
GO: Biological Process	GO:0072089	stem cell proliferation			0.00172	1	0.0122	0.104	4	86	SOX11,CITED1,HMGA2,SIX2
GO: Biological Process	GO:0030326	embryonic limb morphogenesis			0.0018	1	0.0126	0.107	5	146	MYCN,CHD7,HOXA11,SALL1,HOXD11
GO: Biological Process	GO:0035113	embryonic appendage morphogenesis			0.0018	1	0.0126	0.107	5	146	MYCN,CHD7,HOXA11,SALL1,HOXD11
GO: Biological Process	GO:0048565	digestive tract development			0.0018	1	0.0126	0.107	5	146	SOX11,CCNB1,SALL1,SIX2,NPY
GO: Biological Process	GO:0006284	base-excision repair			0.00185	1	0.0129	0.11	3	41	HMGA2,NEIL3,DNA2
GO: Biological Process	GO:0060174	limb bud formation			0.00186	1	0.013	0.11	2	11	COL2A1,SOX11
GO: Biological Process	GO:0021537	telencephalon development			0.00188	1	0.0131	0.112	7	294	CHD7,EZH2,CDK5R1,SALL1,ASPM,KIF14,NPY
GO: Biological Process	GO:2000779	regulation of double-strand break repair			0.00196	1	0.0136	0.116	4	89	FOXM1,CHEK1,HMGA2,PARPBP
GO: Biological Process	GO:0051603	proteolysis involved in cellular protein catabolic process			0.00197	1	0.0137	0.116	12	764	UBE2C,DTL,PBK,CCNB1,AURKA,FBXO5,BUB1B,KIF14,CDK1,CDC20,MAD2L1,AURKB
GO: Biological Process	GO:0019985	translesion synthesis			0.00198	1	0.0137	0.116	3	42	PCLAF,POLE2,DTL
GO: Biological Process	GO:0070317	negative regulation of G0 to G1 transition			0.00198	1	0.0137	0.116	3	42	CHEK1,RRM2,EZH2
GO: Biological Process	GO:0072210	metanephric nephron development			0.00212	1	0.0144	0.123	3	43	CITED1,SALL1,SIX2
GO: Biological Process	GO:0021988	olfactory lobe development			0.00212	1	0.0144	0.123	3	43	CHD7,SALL1,KIF14
GO: Biological Process	GO:0061641	CENP-A containing chromatin organization			0.00212	1	0.0144	0.123	3	43	HJURP,CENPU,OIP5
GO: Biological Process	GO:0061644	protein localization to CENP-A containing chromatin			0.00212	1	0.0144	0.123	3	43	HJURP,CENPU,OIP5
GO: Biological Process	GO:0034080	CENP-A containing nucleosome assembly			0.00212	1	0.0144	0.123	3	43	HJURP,CENPU,OIP5
GO: Biological Process	GO:0051781	positive regulation of cell division			0.00221	1	0.0149	0.126	4	92	KIF23,KIF14,CDC6,AURKB
GO: Biological Process	GO:0051216	cartilage development			0.00222	1	0.0149	0.126	6	224	COL2A1,MYCN,HOXA11,HMGA2,HOXD11,SIX2
GO: Biological Process	GO:0051177	meiotic sister chromatid cohesion			0.00222	1	0.0149	0.126	2	12	BUB1,BUB1B
GO: Biological Process	GO:0045144	meiotic sister chromatid segregation			0.00222	1	0.0149	0.126	2	12	BUB1,BUB1B
GO: Biological Process	GO:0098693	regulation of synaptic vesicle cycle			0.00222	1	0.0149	0.126	2	12	CDK5R1,NRXN1
GO: Biological Process	GO:0070601	centromeric sister chromatid cohesion			0.00222	1	0.0149	0.126	2	12	BUB1,BUB1B
GO: Biological Process	GO:0000727	double-strand break repair via break-induced replication			0.00222	1	0.0149	0.126	2	12	MCM2,GINS2
GO: Biological Process	GO:0031128	developmental induction			0.00241	1	0.0161	0.137	3	45	HOXA11,SALL1,HOXD11
GO: Biological Process	GO:0007398	ectoderm development			0.00242	1	0.0161	0.137	6	228	ITGA8,EYA1,HOXA11,HMGA2,SALL1,SIX2
GO: Biological Process	GO:0006997	nucleus organization			0.00247	1	0.0164	0.14	5	157	CHEK1,CCNB1,CEP55,CCNB2,CDK1
GO: Biological Process	GO:0035136	forelimb morphogenesis			0.00257	1	0.0171	0.145	3	46	HOXA11,SALL1,HOXD11
GO: Biological Process	GO:0034644	cellular response to UV			0.00258	1	0.0171	0.145	4	96	PBK,CHEK1,CDC25A,AURKB
GO: Biological Process	GO:0021683	cerebellar granular layer morphogenesis			0.00261	1	0.0172	0.147	2	13	NRXN1,KIF14
GO: Biological Process	GO:0007267	cell-cell signaling			0.00272	1	0.0179	0.152	22	1971	SOX11,NPTX2,BIRC5,TUBB2B,CITED1,CHD7,CHRNA1,CHRNA5,EDN3,HOXA11,CDK5R1,LYPD1,HMGA2,SALL1,NRXN1,HOXD11,LRRTM2,ASPM,FZD10,ELAVL4,CDC20,NPY
GO: Biological Process	GO:0055123	digestive system development			0.00275	1	0.0181	0.154	5	161	SOX11,CCNB1,SALL1,SIX2,NPY
GO: Biological Process	GO:0006278	RNA-dependent DNA biosynthetic process			0.00278	1	0.0182	0.155	4	98	NEK2,HMGA2,TOP2A,AURKB
GO: Biological Process	GO:0008584	male gonad development			0.0029	1	0.0189	0.161	5	163	KIF18A,BRIP1,HOXA11,HMGA2,ASPM
GO: Biological Process	GO:0070316	regulation of G0 to G1 transition			0.00291	1	0.0189	0.161	3	48	CHEK1,RRM2,EZH2
GO: Biological Process	GO:0045168	cell-cell signaling involved in cell fate commitment			0.00291	1	0.0189	0.161	3	48	HOXA11,SALL1,HOXD11
GO: Biological Process	GO:0046546	development of primary male sexual characteristics			0.00298	1	0.0193	0.164	5	164	KIF18A,BRIP1,HOXA11,HMGA2,ASPM
GO: Biological Process	GO:0099151	regulation of postsynaptic density assembly			0.00304	1	0.0195	0.166	2	14	NRXN1,LRRTM2
GO: Biological Process	GO:1904668	positive regulation of ubiquitin protein ligase activity			0.00304	1	0.0195	0.166	2	14	UBE2C,CDC20
GO: Biological Process	GO:0007135	meiosis II			0.00304	1	0.0195	0.166	2	14	BUB1,BUB1B
GO: Biological Process	GO:0061983	meiosis II cell cycle process			0.00304	1	0.0195	0.166	2	14	BUB1,BUB1B
GO: Biological Process	GO:0048598	embryonic morphogenesis			0.00306	1	0.0196	0.167	11	701	COL2A1,MYCN,SOX11,ITGA8,CHD7,EYA1,HOXA11,HMGA2,SALL1,HOXD11,SIX2
GO: Biological Process	GO:2001020	regulation of response to DNA damage stimulus			0.00306	1	0.0196	0.167	6	239	FOXM1,CHEK1,EYA1,HMGA2,FBXO5,PARPBP
GO: Biological Process	GO:0045023	G0 to G1 transition			0.00308	1	0.0196	0.167	3	49	CHEK1,RRM2,EZH2
GO: Biological Process	GO:0035850	epithelial cell differentiation involved in kidney development			0.00308	1	0.0196	0.167	3	49	CITED1,SALL1,SIX2
GO: Biological Process	GO:0001570	vasculogenesis			0.00321	1	0.0204	0.174	4	102	FOXM1,CITED1,HAS2,TMEM100
GO: Biological Process	GO:0009887	animal organ morphogenesis			0.00326	1	0.0207	0.176	16	1263	COL2A1,MYCN,SOX11,COL13A1,ITGA8,CITED1,CHD7,EYA1,HOXA11,HMGA2,SALL1,HOXD11,PLAG1,HAS2,TMEM100,SIX2
GO: Biological Process	GO:0042327	positive regulation of phosphorylation			0.00327	1	0.0207	0.176	14	1033	CENPE,PBK,EZH2,TTK,EDN3,CCNB1,CDK5R1,HMGA2,NRXN1,TPX2,KIF14,FZD10,CDK1,CDC6
GO: Biological Process	GO:0050679	positive regulation of epithelial cell proliferation			0.00345	1	0.0218	0.185	6	245	SOX11,EYA1,HMGA2,VASH2,HAS2,CDC25A
GO: Biological Process	GO:0001325	formation of extrachromosomal circular DNA			0.00349	1	0.0218	0.185	2	15	EXO1,DNA2
GO: Biological Process	GO:0045842	positive regulation of mitotic metaphase/anaphase transition			0.00349	1	0.0218	0.185	2	15	CENPE,DLGAP5
GO: Biological Process	GO:1901970	positive regulation of mitotic sister chromatid separation			0.00349	1	0.0218	0.185	2	15	CENPE,DLGAP5
GO: Biological Process	GO:0090737	telomere maintenance via telomere trimming			0.00349	1	0.0218	0.185	2	15	EXO1,DNA2
GO: Biological Process	GO:0090656	t-circle formation			0.00349	1	0.0218	0.185	2	15	EXO1,DNA2
GO: Biological Process	GO:0035335	peptidyl-tyrosine dephosphorylation			0.00356	1	0.0221	0.188	4	105	CDKN3,EYA1,CDC25A,CDC25C
GO: Biological Process	GO:2000243	positive regulation of reproductive process			0.00356	1	0.0221	0.188	4	105	AURKA,FBXO5,CDC25A,CDC25C
GO: Biological Process	GO:0030182	neuron differentiation			0.00361	1	0.0224	0.19	19	1639	MYCN,SOX11,TUBB2B,BRINP1,EYA1,EZH2,EDN3,AURKA,CDK5R1,SALL1,NRXN1,CNTN5,UNC5C,VASH2,ASPM,FZD10,ELAVL4,CDC20,NPY
GO: Biological Process	GO:0050768	negative regulation of neurogenesis			0.00365	1	0.0226	0.192	5	172	MYCN,SOX11,BRINP1,CDK5R1,HMGA2
GO: Biological Process	GO:0044257	cellular protein catabolic process			0.00379	1	0.0234	0.199	12	828	UBE2C,DTL,PBK,CCNB1,AURKA,FBXO5,BUB1B,KIF14,CDK1,CDC20,MAD2L1,AURKB
GO: Biological Process	GO:0048477	oogenesis			0.00381	1	0.0235	0.2	4	107	CCNB1,AURKA,FBXO5,ASPM
GO: Biological Process	GO:0007548	sex differentiation			0.00382	1	0.0235	0.2	7	334	KIF18A,BRIP1,CHD7,HOXA11,HMGA2,SALL1,ASPM
GO: Biological Process	GO:0006336	DNA replication-independent nucleosome assembly			0.00385	1	0.0235	0.2	3	53	HJURP,CENPU,OIP5
GO: Biological Process	GO:0006301	postreplication repair			0.00385	1	0.0235	0.2	3	53	PCLAF,POLE2,DTL
GO: Biological Process	GO:0014014	negative regulation of gliogenesis			0.00385	1	0.0235	0.2	3	53	MYCN,SOX11,HMGA2
GO: Biological Process	GO:1902101	positive regulation of metaphase/anaphase transition of cell cycle			0.00397	1	0.0242	0.205	2	16	CENPE,DLGAP5
GO: Biological Process	GO:0090128	regulation of synapse maturation			0.00397	1	0.0242	0.205	2	16	NRXN1,CDC20
GO: Biological Process	GO:0048599	oocyte development			0.00406	1	0.0245	0.209	3	54	CCNB1,AURKA,FBXO5
GO: Biological Process	GO:0034724	DNA replication-independent nucleosome organization			0.00406	1	0.0245	0.209	3	54	HJURP,CENPU,OIP5
GO: Biological Process	GO:0000731	DNA synthesis involved in DNA repair			0.00406	1	0.0245	0.209	3	54	PCLAF,POLE2,DTL
GO: Biological Process	GO:0051961	negative regulation of nervous system development			0.00422	1	0.0255	0.216	5	178	MYCN,SOX11,BRINP1,CDK5R1,HMGA2
GO: Biological Process	GO:0019220	regulation of phosphate metabolic process			0.00427	1	0.0257	0.218	20	1790	CDKN3,CENPE,PBK,EZH2,TTK,EDN3,CCNA2,CCNB1,CDK5R1,HMGA2,NRXN1,CCNB2,CCNE2,TPX2,KIF14,FZD10,CDK1,CDC6,CDC25A,CDC25C
GO: Biological Process	GO:0072091	regulation of stem cell proliferation			0.00428	1	0.0257	0.218	3	55	SOX11,CITED1,HMGA2
GO: Biological Process	GO:0051174	regulation of phosphorus metabolic process			0.0043	1	0.0257	0.219	20	1791	CDKN3,CENPE,PBK,EZH2,TTK,EDN3,CCNA2,CCNB1,CDK5R1,HMGA2,NRXN1,CCNB2,CCNE2,TPX2,KIF14,FZD10,CDK1,CDC6,CDC25A,CDC25C
GO: Biological Process	GO:0007605	sensory perception of sound			0.00443	1	0.0263	0.223	5	180	COL2A1,BIRC5,CHD7,EYA1,CNTN5
GO: Biological Process	GO:0051130	positive regulation of cellular component organization			0.00445	1	0.0263	0.223	16	1304	NUSAP1,CENPE,DLGAP5,EZH2,EDN3,CCNB1,AURKA,NEK2,CDK5R1,FBXO5,NRXN1,LRRTM2,ELAVL4,CDC20,PLK4,AURKB
GO: Biological Process	GO:0000076	DNA replication checkpoint signaling			0.00448	1	0.0263	0.223	2	17	CDC6,DNA2
GO: Biological Process	GO:1904355	positive regulation of telomere capping			0.00448	1	0.0263	0.223	2	17	NEK2,AURKB
GO: Biological Process	GO:1902969	mitotic DNA replication			0.00448	1	0.0263	0.223	2	17	MCM2,GINS1
GO: Biological Process	GO:0007158	neuron cell-cell adhesion			0.00448	1	0.0263	0.223	2	17	CDK5R1,NRXN1
GO: Biological Process	GO:0051444	negative regulation of ubiquitin-protein transferase activity			0.00448	1	0.0263	0.223	2	17	FBXO5,MAD2L1
GO: Biological Process	GO:1904889	regulation of excitatory synapse assembly			0.00448	1	0.0263	0.223	2	17	NRXN1,LRRTM2
GO: Biological Process	GO:0071599	otic vesicle development			0.00448	1	0.0263	0.223	2	17	COL2A1,EYA1
GO: Biological Process	GO:0021681	cerebellar granular layer development			0.00448	1	0.0263	0.223	2	17	NRXN1,KIF14
GO: Biological Process	GO:0006998	nuclear envelope organization			0.0045	1	0.0263	0.223	3	56	CCNB1,CCNB2,CDK1
GO: Biological Process	GO:0032330	regulation of chondrocyte differentiation			0.0045	1	0.0263	0.223	3	56	HOXA11,HOXD11,SIX2
GO: Biological Process	GO:0048511	rhythmic process			0.0047	1	0.0273	0.232	7	347	DTL,EZH2,SUV39H2,CDK5R1,CDK1,HAS2,TOP2A
GO: Biological Process	GO:0021700	developmental maturation			0.0047	1	0.0273	0.232	7	347	CCNB1,AURKA,CDK5R1,FBXO5,NRXN1,KIF14,CDC20
GO: Biological Process	GO:0030856	regulation of epithelial cell differentiation			0.00486	1	0.0282	0.239	5	184	MYCN,CITED1,EZH2,SALL1,TMEM100
GO: Biological Process	GO:0030857	negative regulation of epithelial cell differentiation			0.00497	1	0.0287	0.244	3	58	CITED1,EZH2,SALL1
GO: Biological Process	GO:0090102	cochlea development			0.00497	1	0.0287	0.244	3	58	MCM2,EYA1,CCNA2
GO: Biological Process	GO:0099150	regulation of postsynaptic specialization assembly			0.00503	1	0.0287	0.244	2	18	NRXN1,LRRTM2
GO: Biological Process	GO:0051782	negative regulation of cell division			0.00503	1	0.0287	0.244	2	18	ASPM,AURKB
GO: Biological Process	GO:0001833	inner cell mass cell proliferation			0.00503	1	0.0287	0.244	2	18	CHEK1,GINS1
GO: Biological Process	GO:0061952	midbody abscission			0.00503	1	0.0287	0.244	2	18	CEP55,KIF20A
GO: Biological Process	GO:1905820	positive regulation of chromosome separation			0.00503	1	0.0287	0.244	2	18	CENPE,DLGAP5
GO: Biological Process	GO:0007498	mesoderm development			0.00514	1	0.0293	0.249	6	266	ITGA8,EYA1,HOXA11,HMGA2,SALL1,SIX2
GO: Biological Process	GO:0009994	oocyte differentiation			0.00521	1	0.0296	0.252	3	59	CCNB1,AURKA,FBXO5
GO: Biological Process	GO:0043392	negative regulation of DNA binding			0.00521	1	0.0296	0.252	3	59	SOX11,NEK2,HMGA2
GO: Biological Process	GO:0051100	negative regulation of binding			0.00543	1	0.0308	0.262	5	189	SOX11,AURKA,NEK2,HMGA2,AURKB
GO: Biological Process	GO:0061005	cell differentiation involved in kidney development			0.00546	1	0.0308	0.262	3	60	CITED1,SALL1,SIX2
GO: Biological Process	GO:0043486	histone exchange			0.00546	1	0.0308	0.262	3	60	HJURP,CENPU,OIP5
GO: Biological Process	GO:0051247	positive regulation of protein metabolic process			0.00549	1	0.0309	0.263	19	1704	CENPE,UBE2C,DTL,PBK,EZH2,TTK,EDN3,CCNB1,AURKA,CDK5R1,HMGA2,NRXN1,FANCI,TPX2,KIF14,FZD10,CDK1,CDC6,CDC20
GO: Biological Process	GO:0060123	regulation of growth hormone secretion			0.0056	1	0.0312	0.265	2	19	CHD7,HMGA2
GO: Biological Process	GO:2000696	regulation of epithelial cell differentiation involved in kidney development			0.0056	1	0.0312	0.265	2	19	CITED1,SALL1
GO: Biological Process	GO:0045091	regulation of single stranded viral RNA replication via double stranded DNA intermediate			0.0056	1	0.0312	0.265	2	19	HMGA2,TOP2A
GO: Biological Process	GO:0048385	regulation of retinoic acid receptor signaling pathway			0.0056	1	0.0312	0.265	2	19	EZH2,PRAME
GO: Biological Process	GO:0046661	male sex differentiation			0.00568	1	0.0312	0.265	5	191	KIF18A,BRIP1,HOXA11,HMGA2,ASPM
GO: Biological Process	GO:0001207	histone displacement			0.00572	1	0.0312	0.265	3	61	HJURP,CENPU,OIP5
GO: Biological Process	GO:0065003	protein-containing complex assembly			0.00576	1	0.0312	0.265	20	1839	CLGN,CENPE,CENPF,UBE2C,DLGAP5,HJURP,CENPU,MCM2,OIP5,RRM2,CCNB1,NEK2,CDK5R1,FBXO5,NRXN1,TPX2,KIF14,CDK1,AURKB,HELLS
GO: Biological Process	GO:0048729	tissue morphogenesis			0.0058	1	0.0312	0.265	12	874	MYCN,SOX11,ITGA8,CITED1,CHD7,EYA1,HOXA11,HMGA2,SALL1,HOXD11,TMEM100,SIX2
GO: Biological Process	GO:0008406	gonad development			0.00582	1	0.0312	0.265	6	273	KIF18A,BRIP1,HOXA11,HMGA2,SALL1,ASPM
GO: Biological Process	GO:0042472	inner ear morphogenesis			0.00589	1	0.0312	0.265	4	121	COL2A1,ITGA8,CHD7,EYA1
GO: Biological Process	GO:0003131	mesodermal-endodermal cell signaling			0.00597	1	0.0312	0.265	1	1	HMGA2
GO: Biological Process	GO:0098768	meiotic prometaphase I			0.00597	1	0.0312	0.265	1	1	TTK
GO: Biological Process	GO:0099606	microtubule plus-end directed mitotic chromosome migration			0.00597	1	0.0312	0.265	1	1	CENPE
GO: Biological Process	GO:0045769	negative regulation of asymmetric cell division			0.00597	1	0.0312	0.265	1	1	ASPM
GO: Biological Process	GO:1905116	positive regulation of lateral attachment of mitotic spindle microtubules to kinetochore			0.00597	1	0.0312	0.265	1	1	AURKB
GO: Biological Process	GO:1905115	regulation of lateral attachment of mitotic spindle microtubules to kinetochore			0.00597	1	0.0312	0.265	1	1	AURKB
GO: Biological Process	GO:0031129	inductive cell-cell signaling			0.00597	1	0.0312	0.265	1	1	SALL1
GO: Biological Process	GO:0033316	meiotic spindle assembly checkpoint signaling			0.00597	1	0.0312	0.265	1	1	TTK
GO: Biological Process	GO:1902983	DNA strand elongation involved in mitotic DNA replication			0.00597	1	0.0312	0.265	1	1	GINS1
GO: Biological Process	GO:2000685	positive regulation of cellular response to X-ray			0.00597	1	0.0312	0.265	1	1	HMGA2
GO: Biological Process	GO:0046680	response to DDT			0.00597	1	0.0312	0.265	1	1	CCNB1
GO: Biological Process	GO:1904609	cellular response to monosodium L-glutamate			0.00597	1	0.0312	0.265	1	1	LMNB1
GO: Biological Process	GO:1904608	response to monosodium L-glutamate			0.00597	1	0.0312	0.265	1	1	LMNB1
GO: Biological Process	GO:0003226	right ventricular compact myocardium morphogenesis			0.00597	1	0.0312	0.265	1	1	CHD7
GO: Biological Process	GO:1990550	mitochondrial alpha-ketoglutarate transmembrane transport			0.00597	1	0.0312	0.265	1	1	SLC25A21
GO: Biological Process	GO:1902319	DNA strand elongation involved in nuclear cell cycle DNA replication			0.00597	1	0.0312	0.265	1	1	GINS1
GO: Biological Process	GO:0007344	pronuclear fusion			0.00597	1	0.0312	0.265	1	1	CDK1
GO: Biological Process	GO:1905359	protein localization to meiotic spindle			0.00597	1	0.0312	0.265	1	1	TTK
GO: Biological Process	GO:0090126	protein-containing complex assembly involved in synapse maturation			0.00597	1	0.0312	0.265	1	1	NRXN1
GO: Biological Process	GO:0140207	tripeptide import across plasma membrane			0.00597	1	0.0312	0.265	1	1	SLC15A1
GO: Biological Process	GO:1903126	negative regulation of centriole-centriole cohesion			0.00597	1	0.0312	0.265	1	1	NEK2
GO: Biological Process	GO:0090720	primary adaptive immune response			0.00597	1	0.0312	0.265	1	1	BACH2
GO: Biological Process	GO:0090721	primary adaptive immune response involving T cells and B cells			0.00597	1	0.0312	0.265	1	1	BACH2
GO: Biological Process	GO:1902296	DNA strand elongation involved in cell cycle DNA replication			0.00597	1	0.0312	0.265	1	1	GINS1
GO: Biological Process	GO:0032876	negative regulation of DNA endoreduplication			0.00597	1	0.0312	0.265	1	1	FBXO5
GO: Biological Process	GO:1903096	protein localization to meiotic spindle midzone			0.00597	1	0.0312	0.265	1	1	TTK
GO: Biological Process	GO:0000741	karyogamy			0.00597	1	0.0312	0.265	1	1	CDK1
GO: Biological Process	GO:0021685	cerebellar granular layer structural organization			0.00597	1	0.0312	0.265	1	1	KIF14
GO: Biological Process	GO:2000775	histone H3-S10 phosphorylation involved in chromosome condensation			0.00597	1	0.0312	0.265	1	1	CCNB1
GO: Biological Process	GO:0048232	male gamete generation			0.00598	1	0.0312	0.265	10	660	KIF18A,BRIP1,CLGN,SUV39H2,CCNB1,HOXA11,HMGA2,ADGRG2,ASPM,CDC25C
GO: Biological Process	GO:0017145	stem cell division			0.00606	1	0.0314	0.267	4	122	SOX11,CITED1,HMGA2,SIX2
GO: Biological Process	GO:0090100	positive regulation of transmembrane receptor protein serine/threonine kinase signaling pathway			0.00606	1	0.0314	0.267	4	122	SOX11,ITGA8,CITED1,TTK
GO: Biological Process	GO:0007096	regulation of exit from mitosis			0.00619	1	0.0318	0.27	2	20	UBE2C,BIRC5
GO: Biological Process	GO:0072520	seminiferous tubule development			0.00619	1	0.0318	0.27	2	20	KIF18A,BRIP1
GO: Biological Process	GO:0039692	single stranded viral RNA replication via double stranded DNA intermediate			0.00619	1	0.0318	0.27	2	20	HMGA2,TOP2A
GO: Biological Process	GO:0001171	reverse transcription			0.00619	1	0.0318	0.27	2	20	HMGA2,TOP2A
GO: Biological Process	GO:1905874	regulation of postsynaptic density organization			0.00619	1	0.0318	0.27	2	20	NRXN1,LRRTM2
GO: Biological Process	GO:0051447	negative regulation of meiotic cell cycle			0.00619	1	0.0318	0.27	2	20	TTK,FBXO5
GO: Biological Process	GO:0042063	gliogenesis			0.00625	1	0.032	0.272	7	366	MYCN,SOX11,EZH2,CDK5R1,HMGA2,PLAG1,CDK1
GO: Biological Process	GO:0045137	development of primary sexual characteristics			0.00635	1	0.0325	0.276	6	278	KIF18A,BRIP1,HOXA11,HMGA2,SALL1,ASPM
GO: Biological Process	GO:0098727	maintenance of cell number			0.00645	1	0.0329	0.28	5	197	EZH2,HMGA2,SALL1,ASPM,SIX2
GO: Biological Process	GO:0045596	negative regulation of cell differentiation			0.0065	1	0.0331	0.281	11	776	MYCN,SOX11,CITED1,BRINP1,EZH2,CDK5R1,HMGA2,SALL1,ASPM,PRAME,SIX2
GO: Biological Process	GO:0090342	regulation of cell aging			0.00653	1	0.0332	0.283	3	64	FOXM1,HMGA2,FBXO5
GO: Biological Process	GO:0021543	pallium development			0.00659	1	0.0335	0.284	5	198	EZH2,CDK5R1,ASPM,KIF14,NPY
GO: Biological Process	GO:0045937	positive regulation of phosphate metabolic process			0.00667	1	0.0337	0.287	14	1121	CENPE,PBK,EZH2,TTK,EDN3,CCNB1,CDK5R1,HMGA2,NRXN1,TPX2,KIF14,FZD10,CDK1,CDC6
GO: Biological Process	GO:0010562	positive regulation of phosphorus metabolic process			0.00667	1	0.0337	0.287	14	1121	CENPE,PBK,EZH2,TTK,EDN3,CCNB1,CDK5R1,HMGA2,NRXN1,TPX2,KIF14,FZD10,CDK1,CDC6
GO: Biological Process	GO:0048557	embryonic digestive tract morphogenesis			0.00682	1	0.0342	0.291	2	21	SOX11,SIX2
GO: Biological Process	GO:0039695	DNA-templated viral transcription			0.00682	1	0.0342	0.291	2	21	HMGA2,TOP2A
GO: Biological Process	GO:0030903	notochord development			0.00682	1	0.0342	0.291	2	21	COL2A1,COL13A1
GO: Biological Process	GO:1900006	positive regulation of dendrite development			0.00682	1	0.0342	0.291	2	21	EZH2,ELAVL4
GO: Biological Process	GO:0048712	negative regulation of astrocyte differentiation			0.00682	1	0.0342	0.291	2	21	MYCN,HMGA2
GO: Biological Process	GO:0010720	positive regulation of cell development			0.00691	1	0.0346	0.294	7	373	SOX11,AURKA,HOXA11,HOXD11,ASPM,PLAG1,HAS2
GO: Biological Process	GO:0032270	positive regulation of cellular protein metabolic process			0.00709	1	0.0354	0.301	18	1619	CENPE,UBE2C,PBK,EZH2,TTK,EDN3,CCNB1,AURKA,CDK5R1,HMGA2,NRXN1,FANCI,TPX2,KIF14,FZD10,CDK1,CDC6,CDC20
GO: Biological Process	GO:0007062	sister chromatid cohesion			0.00712	1	0.0355	0.302	3	66	BUB1,BUB1B,CDC20
GO: Biological Process	GO:0097107	postsynaptic density assembly			0.00747	1	0.0372	0.316	2	22	NRXN1,LRRTM2
GO: Biological Process	GO:0021549	cerebellum development			0.00756	1	0.0375	0.319	4	130	EZH2,CDK5R1,NRXN1,KIF14
GO: Biological Process	GO:0045597	positive regulation of cell differentiation			0.00756	1	0.0375	0.319	13	1020	SOX11,BRINP1,EZH2,EDN3,AURKA,HOXA11,SALL1,FBXO5,HOXD11,ASPM,PLAG1,HAS2,TMEM100
GO: Biological Process	GO:0021695	cerebellar cortex development			0.00773	1	0.0382	0.325	3	68	EZH2,NRXN1,KIF14
GO: Biological Process	GO:0071695	anatomical structure maturation			0.00787	1	0.0389	0.331	6	291	CCNB1,AURKA,CDK5R1,FBXO5,NRXN1,KIF14
GO: Biological Process	GO:0003007	heart morphogenesis			0.008	1	0.0394	0.335	6	292	COL2A1,SOX11,CHD7,EYA1,HAS2,TMEM100
GO: Biological Process	GO:0030252	growth hormone secretion			0.00815	1	0.0399	0.339	2	23	CHD7,HMGA2
GO: Biological Process	GO:0071625	vocalization behavior			0.00815	1	0.0399	0.339	2	23	BRINP1,NRXN1
GO: Biological Process	GO:0001502	cartilage condensation			0.00815	1	0.0399	0.339	2	23	COL2A1,MYCN
GO: Biological Process	GO:0032332	positive regulation of chondrocyte differentiation			0.00815	1	0.0399	0.339	2	23	HOXA11,HOXD11
GO: Biological Process	GO:0071478	cellular response to radiation			0.00823	1	0.0402	0.342	5	209	PBK,CHEK1,HMGA2,CDC25A,AURKB
GO: Biological Process	GO:0060537	muscle tissue development			0.0087	1	0.0422	0.359	8	488	SOX11,CENPF,ITGA8,CHD7,EYA1,CHRNA1,CCNB1,CDK1
GO: Biological Process	GO:0001704	formation of primary germ layer			0.00872	1	0.0422	0.359	5	212	ITGA8,EYA1,HOXA11,HMGA2,SIX2
GO: Biological Process	GO:0001705	ectoderm formation			0.00872	1	0.0422	0.359	5	212	ITGA8,EYA1,HOXA11,HMGA2,SIX2
GO: Biological Process	GO:0001706	endoderm formation			0.00872	1	0.0422	0.359	5	212	ITGA8,EYA1,HOXA11,HMGA2,SIX2
GO: Biological Process	GO:0001707	mesoderm formation			0.00872	1	0.0422	0.359	5	212	ITGA8,EYA1,HOXA11,HMGA2,SIX2
GO: Biological Process	GO:0007369	gastrulation			0.00872	1	0.0422	0.359	5	212	ITGA8,EYA1,HOXA11,HMGA2,SIX2
GO: Biological Process	GO:0051101	regulation of DNA binding			0.00883	1	0.0424	0.36	4	136	SOX11,HJURP,NEK2,HMGA2
GO: Biological Process	GO:0035988	chondrocyte proliferation			0.00886	1	0.0424	0.36	2	24	HMGA2,SIX2
GO: Biological Process	GO:1902410	mitotic cytokinetic process			0.00886	1	0.0424	0.36	2	24	CEP55,KIF20A
GO: Biological Process	GO:0042474	middle ear morphogenesis			0.00886	1	0.0424	0.36	2	24	EYA1,SIX2
GO: Biological Process	GO:0090189	regulation of branching involved in ureteric bud morphogenesis			0.00886	1	0.0424	0.36	2	24	SALL1,SIX2
GO: Biological Process	GO:2000773	negative regulation of cellular senescence			0.00886	1	0.0424	0.36	2	24	HMGA2,FBXO5
GO: Biological Process	GO:0060429	epithelium development			0.00903	1	0.043	0.365	17	1532	COL2A1,MYCN,SOX11,CITED1,CHD7,EYA1,EZH2,MEOX1,HOXA11,HMGA2,SALL1,HOXD11,CDK1,TMEM100,PLK4,SIX2,NPY
GO: Biological Process	GO:0048146	positive regulation of fibroblast proliferation			0.00904	1	0.043	0.365	3	72	CCNA2,CCNB1,CDC6
GO: Biological Process	GO:0042752	regulation of circadian rhythm			0.00906	1	0.043	0.365	4	137	EZH2,SUV39H2,CDK1,TOP2A
GO: Biological Process	GO:0050954	sensory perception of mechanical stimulus			0.00906	1	0.043	0.365	5	214	COL2A1,BIRC5,CHD7,EYA1,CNTN5
GO: Biological Process	GO:0048332	mesoderm morphogenesis			0.00906	1	0.043	0.365	5	214	ITGA8,EYA1,HOXA11,HMGA2,SIX2
GO: Biological Process	GO:0099536	synaptic signaling			0.00914	1	0.0433	0.368	12	928	NPTX2,TUBB2B,CHRNA1,CHRNA5,EDN3,CDK5R1,LYPD1,NRXN1,LRRTM2,ELAVL4,CDC20,NPY
GO: Biological Process	GO:0045934	negative regulation of nucleobase-containing compound metabolic process			0.00941	1	0.0445	0.378	18	1666	FOXM1,SOX11,CENPF,BACH2,BIRC5,CITED1,DEPDC1,CHEK1,EZH2,SUV39H2,CDK5R1,HMGA2,SALL1,ELAVL4,PARPBP,PRAME,AURKB,HELLS
GO: Biological Process	GO:0021987	cerebral cortex development			0.00952	1	0.0448	0.381	4	139	CDK5R1,ASPM,KIF14,NPY
GO: Biological Process	GO:0017015	regulation of transforming growth factor beta receptor signaling pathway			0.00952	1	0.0448	0.381	4	139	SOX11,PEG10,ITGA8,CITED1
GO: Biological Process	GO:0000724	double-strand break repair via homologous recombination			0.00952	1	0.0448	0.381	4	139	MCM2,CHEK1,GINS2,PARPBP
GO: Biological Process	GO:0048469	cell maturation			0.00958	1	0.0449	0.382	5	217	CCNB1,AURKA,FBXO5,NRXN1,KIF14
GO: Biological Process	GO:0000729	DNA double-strand break processing			0.00959	1	0.0449	0.382	2	25	BRIP1,DNA2
GO: Biological Process	GO:1904385	cellular response to angiotensin			0.00959	1	0.0449	0.382	2	25	BRIP1,CDC6
GO: Biological Process	GO:0061448	connective tissue development			0.00993	1	0.0464	0.394	6	306	COL2A1,MYCN,HOXA11,HMGA2,HOXD11,SIX2
GO: Biological Process	GO:0051052	regulation of DNA metabolic process			0.00994	1	0.0464	0.394	7	400	FOXM1,CHEK1,EYA1,NEK2,HMGA2,PARPBP,AURKB
GO: Biological Process	GO:0000725	recombinational repair			0.00999	1	0.0465	0.396	4	141	MCM2,CHEK1,GINS2,PARPBP
GO: Biological Process	GO:0010721	negative regulation of cell development			0.0101	1	0.0471	0.4	5	220	MYCN,SOX11,BRINP1,CDK5R1,HMGA2
GO: Biological Process	GO:1903844	regulation of cellular response to transforming growth factor beta stimulus			0.0102	1	0.0474	0.403	4	142	SOX11,PEG10,ITGA8,CITED1
GO: Biological Process	GO:0022037	metencephalon development			0.0102	1	0.0474	0.403	4	142	EZH2,CDK5R1,NRXN1,KIF14
GO: Biological Process	GO:0098743	cell aggregation			0.0104	1	0.0479	0.407	2	26	COL2A1,MYCN
GO: Cellular Component	GO:0005819	spindle			1.34e-23	4.27e-21	4.27e-21	2.71e-20	29	399	NUSAP1,KIF18A,KIF23,CENPE,CENPF,DLGAP5,KIF4A,BIRC5,PRC1,TTK,CCNB1,KIF20A,AURKA,NEK2,FBXO5,KIF15,BUB1B,TPX2,ASPM,KIF14,CDK1,CDC6,CDC20,KIF18B,PLK4,MAD2L1,KIF11,AURKB,KIF2C
GO: Cellular Component	GO:0098687	chromosomal region			3.89e-21	1.24e-18	6.18e-19	3.92e-18	26	359	KIF18A,CENPE,CENPF,HJURP,SPC25,CENPU,MCM2,OIP5,BIRC5,CHEK1,EZH2,TTK,SUV39H2,CCNB1,NEK2,NCAPG,NDC80,BUB1,BUB1B,CDK1,DNA2,TOP2A,MAD2L1,AURKB,KIF2C,HELLS
GO: Cellular Component	GO:0000775	chromosome, centromeric region			3.57e-20	1.14e-17	3.78e-18	2.4e-17	21	208	KIF18A,CENPE,CENPF,HJURP,SPC25,CENPU,OIP5,BIRC5,TTK,SUV39H2,CCNB1,NEK2,NCAPG,NDC80,BUB1,BUB1B,TOP2A,MAD2L1,AURKB,KIF2C,HELLS
GO: Cellular Component	GO:0005694	chromosome			5.27e-19	1.68e-16	4.19e-17	2.66e-16	47	1845	FOXM1,NUSAP1,MYCN,SOX11,KIF18A,CENPE,CENPF,POLE2,BACH2,DTL,HJURP,SPC25,CENPU,KIF4A,MCM2,OIP5,BIRC5,CHEK1,MCM10,PRC1,EZH2,NCAPH,TTK,SUV39H2,GINS1,CCNB1,MEOX1,NEK2,NCAPG,HMGA2,SALL1,NDC80,HOXD11,BUB1,BUB1B,GINS2,NEIL3,CDK1,PARPBP,DNA2,PLK4,SIX2,TOP2A,MAD2L1,AURKB,KIF2C,HELLS
GO: Cellular Component	GO:0015630	microtubule cytoskeleton			1.16e-17	3.7e-15	7.4e-16	4.69e-15	41	1481	NUSAP1,KIF18A,KIF23,CENPE,CENPF,PCLAF,DTL,DLGAP5,CENPU,KIF4A,BIRC5,TUBB2B,CHEK1,HMMR,PRC1,TTK,CCNB1,CEP55,KIF20A,AURKA,NEK2,FBXO5,KIF15,NDC80,CCNB2,CCNE2,BUB1B,TPX2,ASPM,KIF14,PLAG1,CDK1,CDC6,CDC20,KIF18B,PLK4,TOP2A,MAD2L1,KIF11,AURKB,KIF2C
GO: Cellular Component	GO:0000776	kinetochore			1.88e-16	5.99e-14	9.99e-15	6.33e-14	16	140	KIF18A,CENPE,CENPF,HJURP,SPC25,CENPU,BIRC5,TTK,CCNB1,NEK2,NDC80,BUB1,BUB1B,MAD2L1,AURKB,KIF2C
GO: Cellular Component	GO:0000779	condensed chromosome, centromeric region			3.87e-16	1.23e-13	1.76e-14	1.12e-13	15	119	CENPE,CENPF,HJURP,SPC25,CENPU,BIRC5,CCNB1,NEK2,NCAPG,NDC80,BUB1,BUB1B,MAD2L1,AURKB,KIF2C
GO: Cellular Component	GO:0000793	condensed chromosome			3.69e-14	1.17e-11	1.47e-12	9.29e-12	17	232	CENPE,CENPF,HJURP,SPC25,CENPU,BIRC5,CHEK1,CCNB1,NEK2,NCAPG,NDC80,BUB1,BUB1B,TOP2A,MAD2L1,AURKB,KIF2C
GO: Cellular Component	GO:0005814	centriole			1.93e-13	6.14e-11	6.82e-12	4.32e-11	25	681	KIF23,CENPF,PCLAF,DTL,DLGAP5,CENPU,BIRC5,CHEK1,HMMR,CCNB1,CEP55,AURKA,NEK2,KIF15,NDC80,CCNB2,CCNE2,ASPM,PLAG1,CDK1,CDC20,PLK4,TOP2A,AURKB,KIF2C
GO: Cellular Component	GO:0005815	microtubule organizing center			3.37e-13	1.07e-10	1.07e-11	6.8e-11	27	832	KIF18A,KIF23,CENPF,PCLAF,DTL,DLGAP5,CENPU,BIRC5,CHEK1,HMMR,CCNB1,CEP55,AURKA,NEK2,KIF15,NDC80,CCNB2,CCNE2,BUB1B,ASPM,PLAG1,CDK1,CDC20,PLK4,TOP2A,AURKB,KIF2C
GO: Cellular Component	GO:0072686	mitotic spindle			7.27e-13	2.31e-10	2.1e-11	1.33e-10	14	161	NUSAP1,KIF18A,KIF23,CENPE,PRC1,AURKA,TPX2,ASPM,CDK1,CDC6,KIF18B,MAD2L1,KIF11,AURKB
GO: Cellular Component	GO:0000922	spindle pole			1.54e-12	4.89e-10	4.08e-11	2.59e-10	14	170	CENPF,DLGAP5,PRC1,CCNB1,AURKA,NEK2,TPX2,ASPM,CDC6,CDC20,PLK4,MAD2L1,KIF11,AURKB
GO: Cellular Component	GO:0005813	centrosome			2.44e-12	7.75e-10	5.96e-11	3.78e-10	23	632	KIF23,CENPF,PCLAF,DTL,DLGAP5,CENPU,CHEK1,HMMR,CCNB1,CEP55,AURKA,NEK2,KIF15,NDC80,CCNB2,CCNE2,ASPM,PLAG1,CDK1,CDC20,PLK4,AURKB,KIF2C
GO: Cellular Component	GO:0030496	midbody			1.41e-11	4.47e-09	3.19e-10	2.02e-09	14	200	KIF23,CENPE,CENPF,KIF4A,BIRC5,PRC1,CEP55,KIF20A,AURKA,NEK2,ASPM,KIF14,CDK1,AURKB
GO: Cellular Component	GO:0005876	spindle microtubule			1.64e-11	5.22e-09	3.48e-10	2.21e-09	10	73	KIF18A,CENPE,KIF4A,BIRC5,PRC1,AURKA,CDK1,KIF18B,KIF11,AURKB
GO: Cellular Component	GO:0000228	nuclear chromosome			4.95e-11	1.57e-08	9.4e-10	5.96e-09	15	264	CENPE,POLE2,MCM2,BIRC5,CHEK1,MCM10,GINS1,CCNB1,NEK2,HMGA2,NDC80,BUB1,BUB1B,GINS2,TOP2A
GO: Cellular Component	GO:0051233	spindle midzone			5.02e-11	1.6e-08	9.4e-10	5.96e-09	8	38	KIF18A,CENPE,PRC1,AURKA,KIF14,CDC6,KIF18B,AURKB
GO: Cellular Component	GO:0099080	supramolecular complex			1.38e-10	4.39e-08	2.44e-09	1.55e-08	36	1895	COL2A1,NUSAP1,KIF18A,KIF23,CENPE,CENPF,HJURP,SPC25,CENPU,KIF4A,BIRC5,TUBB2B,PRC1,TTK,CCNB1,SMPX,KIF20A,AURKA,NEK2,CDK5R1,KIF15,LMNB1,NDC80,SLC15A1,UNC5C,BUB1,BUB1B,TPX2,ASPM,KIF14,CDK1,KIF18B,MAD2L1,KIF11,AURKB,KIF2C
GO: Cellular Component	GO:0005874	microtubule			2.54e-10	8.09e-08	4.26e-09	2.7e-08	21	655	NUSAP1,KIF18A,KIF23,CENPE,CENPF,KIF4A,BIRC5,TUBB2B,PRC1,KIF20A,AURKA,NEK2,KIF15,TPX2,ASPM,KIF14,CDK1,KIF18B,KIF11,AURKB,KIF2C
GO: Cellular Component	GO:0000940	outer kinetochore			2.9e-10	9.21e-08	4.61e-09	2.92e-08	6	16	CENPE,CENPF,CCNB1,NDC80,BUB1,BUB1B
GO: Cellular Component	GO:0005871	kinesin complex			7.22e-10	2.3e-07	1.09e-08	6.93e-08	8	52	KIF18A,KIF23,KIF20A,KIF15,KIF14,KIF18B,KIF11,KIF2C
GO: Cellular Component	GO:1990023	mitotic spindle midzone			1.92e-08	6.09e-06	2.77e-07	1.76e-06	5	15	KIF18A,CENPE,PRC1,KIF18B,AURKB
GO: Cellular Component	GO:0099512	supramolecular fiber			3.78e-07	0.00012	5.23e-06	3.32e-05	27	1572	COL2A1,NUSAP1,KIF18A,KIF23,CENPE,CENPF,KIF4A,BIRC5,TUBB2B,PRC1,SMPX,KIF20A,AURKA,NEK2,CDK5R1,KIF15,LMNB1,SLC15A1,UNC5C,TPX2,ASPM,KIF14,CDK1,KIF18B,KIF11,AURKB,KIF2C
GO: Cellular Component	GO:0099081	supramolecular polymer			4.18e-07	0.000133	5.54e-06	3.52e-05	27	1580	COL2A1,NUSAP1,KIF18A,KIF23,CENPE,CENPF,KIF4A,BIRC5,TUBB2B,PRC1,SMPX,KIF20A,AURKA,NEK2,CDK5R1,KIF15,LMNB1,SLC15A1,UNC5C,TPX2,ASPM,KIF14,CDK1,KIF18B,KIF11,AURKB,KIF2C
GO: Cellular Component	GO:0099513	polymeric cytoskeletal fiber			1.15e-06	0.000365	1.46e-05	9.26e-05	24	1357	NUSAP1,KIF18A,KIF23,CENPE,CENPF,KIF4A,BIRC5,TUBB2B,PRC1,KIF20A,AURKA,NEK2,KIF15,LMNB1,SLC15A1,UNC5C,TPX2,ASPM,KIF14,CDK1,KIF18B,KIF11,AURKB,KIF2C
GO: Cellular Component	GO:0000794	condensed nuclear chromosome			1.77e-06	0.000562	2.16e-05	0.000137	7	97	CENPE,CHEK1,CCNB1,NEK2,NDC80,BUB1,BUB1B
GO: Cellular Component	GO:0005875	microtubule associated complex			2.85e-06	0.000907	3.36e-05	0.000213	11	316	KIF18A,KIF23,BIRC5,KIF20A,AURKA,KIF15,KIF14,KIF18B,KIF11,AURKB,KIF2C
GO: Cellular Component	GO:0032133	chromosome passenger complex			4e-06	0.00127	4.54e-05	0.000288	3	6	BIRC5,AURKA,AURKB
GO: Cellular Component	GO:0000307	cyclin-dependent protein kinase holoenzyme complex			6.04e-06	0.00192	6.62e-05	0.00042	5	44	CCNA2,CCNB1,CCNB2,CCNE2,CDK1
GO: Cellular Component	GO:0045171	intercellular bridge			6.39e-06	0.00203	6.77e-05	0.00043	6	77	KIF23,PRC1,CEP55,KIF20A,TPX2,CDC6
GO: Cellular Component	GO:0045120	pronucleus			7.87e-06	0.0025	8.07e-05	0.000512	4	22	CENPF,EZH2,CCNA2,AURKA
GO: Cellular Component	GO:1902554	serine/threonine protein kinase complex			1.79e-05	0.00569	0.000178	0.00113	6	92	CCNA2,CCNB1,CDK5R1,CCNB2,CCNE2,CDK1
GO: Cellular Component	GO:0097125	cyclin B1-CDK1 complex			3.5e-05	0.0111	0.000337	0.00214	2	2	CCNB1,CDK1
GO: Cellular Component	GO:0005818	aster			4.28e-05	0.0136	0.000401	0.00254	3	12	KIF18A,TPX2,KIF18B
GO: Cellular Component	GO:1902911	protein kinase complex			4.93e-05	0.0157	0.000448	0.00284	6	110	CCNA2,CCNB1,CDK5R1,CCNB2,CCNE2,CDK1
GO: Cellular Component	GO:0072687	meiotic spindle			0.000107	0.0341	0.000946	0.006	3	16	AURKA,FBXO5,ASPM
GO: Cellular Component	GO:0071162	CMG complex			0.000144	0.0459	0.00121	0.00766	4	45	MCM2,MCM10,GINS1,GINS2
GO: Cellular Component	GO:0000811	GINS complex			0.000144	0.0459	0.00121	0.00766	4	45	MCM2,MCM10,GINS1,GINS2
GO: Cellular Component	GO:0010369	chromocenter			0.000155	0.0492	0.00126	0.008	3	18	OIP5,SALL1,AURKB
GO: Cellular Component	GO:0031261	DNA replication preinitiation complex			0.000171	0.0544	0.00136	0.00863	4	47	MCM2,MCM10,GINS1,GINS2
GO: Cellular Component	GO:0031616	spindle pole centrosome			0.000183	0.0582	0.00138	0.00872	3	19	DLGAP5,AURKA,AURKB
GO: Cellular Component	GO:0036387	pre-replicative complex			0.000186	0.0591	0.00138	0.00872	4	48	MCM2,MCM10,GINS1,GINS2
GO: Cellular Component	GO:0005656	nuclear pre-replicative complex			0.000186	0.0591	0.00138	0.00872	4	48	MCM2,MCM10,GINS1,GINS2
GO: Cellular Component	GO:0005635	nuclear envelope			0.000204	0.0649	0.00143	0.00907	11	504	PLAAT1,BRIP1,CLGN,CENPF,DTL,RRM2,RGS7,LMNB1,NRXN1,ELAVL4,MAD2L1
GO: Cellular Component	GO:0031262	Ndc80 complex			0.000207	0.0658	0.00143	0.00907	2	4	SPC25,NDC80
GO: Cellular Component	GO:0031617	NMS complex			0.000207	0.0658	0.00143	0.00907	2	4	SPC25,NDC80
GO: Cellular Component	GO:0061695	transferase complex, transferring phosphorus-containing groups			0.000241	0.0766	0.00163	0.0103	8	276	POLE2,CCNA2,CCNB1,CDK5R1,CCNB2,CCNE2,CDK1,DNA2
GO: Cellular Component	GO:0097373	MCM core complex			0.000254	0.0808	0.00165	0.0105	4	52	MCM2,MCM10,GINS1,GINS2
GO: Cellular Component	GO:0042555	MCM complex			0.000254	0.0808	0.00165	0.0105	4	52	MCM2,MCM10,GINS1,GINS2
GO: Cellular Component	GO:0000808	origin recognition complex			0.000316	0.1	0.00201	0.0127	4	55	MCM2,MCM10,GINS1,GINS2
GO: Cellular Component	GO:0005680	anaphase-promoting complex			0.000329	0.105	0.00205	0.013	3	23	UBE2C,BUB1B,CDC20
GO: Cellular Component	GO:0032993	protein-DNA complex			0.00048	0.153	0.00293	0.0186	7	233	MCM2,EYA1,MCM10,GINS1,HOXA11,HMGA2,GINS2
GO: Cellular Component	GO:0000785	chromatin			0.000599	0.191	0.0036	0.0228	18	1294	FOXM1,MYCN,SOX11,CENPF,BACH2,MCM2,OIP5,CHEK1,EZH2,SUV39H2,MEOX1,HMGA2,SALL1,HOXD11,PARPBP,PLK4,SIX2,HELLS
GO: Cellular Component	GO:0000792	heterochromatin			0.000636	0.202	0.00374	0.0237	5	116	SUV39H2,HMGA2,SALL1,PLK4,HELLS
GO: Cellular Component	GO:0005828	kinetochore microtubule			0.000716	0.228	0.00414	0.0263	2	7	KIF18A,CENPE
GO: Cellular Component	GO:0061673	mitotic spindle astral microtubule			0.000951	0.302	0.00531	0.0336	2	8	KIF18A,KIF18B
GO: Cellular Component	GO:0000796	condensin complex			0.000951	0.302	0.00531	0.0336	2	8	NCAPH,NCAPG
GO: Cellular Component	GO:1990234	transferase complex			0.000981	0.312	0.00538	0.0341	13	806	POLE2,UBE2C,DTL,EZH2,CCNA2,CCNB1,CDK5R1,CCNB2,CCNE2,BUB1B,CDK1,CDC20,DNA2
GO: Cellular Component	GO:1990752	microtubule end			0.00106	0.337	0.00571	0.0362	3	34	ASPM,KIF18B,KIF2C
GO: Cellular Component	GO:0043203	axon hillock			0.00122	0.387	0.00643	0.0408	2	9	AURKA,TPX2
GO: Cellular Component	GO:0090543	Flemming body			0.00125	0.398	0.00643	0.0408	3	36	KIF23,CEP55,KIF14
GO: Cellular Component	GO:0097431	mitotic spindle pole			0.00125	0.398	0.00643	0.0408	3	36	AURKA,ASPM,AURKB
GO: Cellular Component	GO:0000235	astral microtubule			0.00185	0.587	0.00932	0.0591	2	11	KIF18A,KIF18B
GO: Cellular Component	GO:0097060	synaptic membrane			0.00223	0.711	0.011	0.0697	9	480	NPTX2,COL13A1,ITGA8,CHRNA1,RGS7,CHRNA5,NRXN1,CNTN5,LRRTM2
GO: Cellular Component	GO:0000152	nuclear ubiquitin ligase complex			0.00225	0.714	0.011	0.0697	3	44	UBE2C,BUB1B,CDC20
GO: Cellular Component	GO:0000781	chromosome, telomeric region			0.00294	0.936	0.0142	0.0899	5	164	MCM2,CHEK1,EZH2,CDK1,DNA2
GO: Cellular Component	GO:0005892	acetylcholine-gated channel complex			0.00446	1	0.0212	0.134	2	17	CHRNA1,CHRNA5
GO: Cellular Component	GO:0043025	neuronal cell body			0.00511	1	0.0239	0.152	11	753	ITGA8,BRINP1,CHRNA5,AURKA,CDK5R1,NRXN1,UNC5C,TPX2,ELAVL4,TMEM100,NPY
GO: Cellular Component	GO:0032154	cleavage furrow			0.00542	1	0.025	0.158	3	60	CEP55,KIF20A,PLK4
GO: Cellular Component	GO:0030936	transmembrane collagen trimer			0.00596	1	0.0259	0.165	1	1	COL13A1
GO: Cellular Component	GO:0009330	DNA topoisomerase type II (double strand cut, ATP-hydrolyzing) complex			0.00596	1	0.0259	0.165	1	1	TOP2A
GO: Cellular Component	GO:0005585	collagen type II trimer			0.00596	1	0.0259	0.165	1	1	COL2A1
GO: Cellular Component	GO:0005600	collagen type XIII trimer			0.00596	1	0.0259	0.165	1	1	COL13A1
GO: Cellular Component	GO:0043204	perikaryon			0.00782	1	0.0336	0.213	5	207	ITGA8,CDK5R1,ELAVL4,TMEM100,NPY
GO: Cellular Component	GO:0035371	microtubule plus-end			0.00881	1	0.0374	0.237	2	24	KIF18B,KIF2C
GO: Cellular Component	GO:0140513	nuclear protein-containing complex			0.0105	1	0.044	0.279	15	1310	POLE2,UBE2C,MCM2,MCM10,EZH2,GINS1,CCNB1,SALL1,NDC80,FANCI,BUB1,BUB1B,GINS2,CDC20,MAD2L1
GO: Cellular Component	GO:0032153	cell division site			0.0112	1	0.0458	0.29	3	78	CEP55,KIF20A,PLK4
GO: Cellular Component	GO:0044297	cell body			0.0116	1	0.0458	0.29	11	845	ITGA8,BRINP1,CHRNA5,AURKA,CDK5R1,NRXN1,UNC5C,TPX2,ELAVL4,TMEM100,NPY
GO: Cellular Component	GO:0048471	perinuclear region of cytoplasm			0.0117	1	0.0458	0.29	11	846	CDKN3,CENPF,PCLAF,AURKA,CDK5R1,BUB1B,CDC20,CDC25C,TMEM100,NPY,MAD2L1
GO: Cellular Component	GO:0005880	nuclear microtubule			0.0118	1	0.0458	0.29	1	2	TPX2
GO: Cellular Component	GO:0005971	ribonucleoside-diphosphate reductase complex			0.0118	1	0.0458	0.29	1	2	RRM2
GO: Cellular Component	GO:0097135	cyclin E2-CDK2 complex			0.0118	1	0.0458	0.29	1	2	CCNE2
Human Phenotype	HP:0000356	Abnormality of the outer ear			4.69e-09	1.14e-05	1.14e-05	9.56e-05	24	861	COL2A1,MYCN,SOX11,BRIP1,COL13A1,CENPE,ITGA8,CHD7,EYA1,EZH2,CHRNA1,EDN3,MEOX1,HMGA2,SALL1,FANCI,BUB1,BUB1B,KIF14,PLAG1,CDC6,PLK4,KIF11,HELLS
Human Phenotype	HP:0000347	Micrognathia			2.05e-08	4.98e-05	1.82e-05	0.000152	19	555	COL2A1,MYCN,BRIP1,COL13A1,CENPE,CHD7,EYA1,EZH2,CHRNA1,HMGA2,FANCI,BUB1,BUB1B,KIF14,PLAG1,CDC6,DNA2,PLK4,HELLS
Human Phenotype	HP:0009118	Aplasia/Hypoplasia of the mandible			2.24e-08	5.45e-05	1.82e-05	0.000152	19	558	COL2A1,MYCN,BRIP1,COL13A1,CENPE,CHD7,EYA1,EZH2,CHRNA1,HMGA2,FANCI,BUB1,BUB1B,KIF14,PLAG1,CDC6,DNA2,PLK4,HELLS
Human Phenotype	HP:0000277	Abnormality of the mandible			5.36e-08	0.00013	2.96e-05	0.000248	21	730	COL2A1,MYCN,BRIP1,COL13A1,CENPE,ITGA8,CHD7,EYA1,EZH2,CHRNA1,HMGA2,FANCI,BUB1,BUB1B,KIF14,PLAG1,CDC6,DNA2,PLK4,KIF11,HELLS
Human Phenotype	HP:0004207	Abnormal 5th finger morphology			6.08e-08	0.000148	2.96e-05	0.000248	15	349	COL2A1,MYCN,SOX11,BRIP1,CENPE,CHD7,HOXA11,HMGA2,SALL1,FANCI,BUB1,BUB1B,PLAG1,CDC6,PLK4
Human Phenotype	HP:0002246	Abnormal duodenum morphology			1.41e-07	0.000344	5.44e-05	0.000456	7	50	MYCN,BRIP1,CHD7,SALL1,FANCI,BUB1,BUB1B
Human Phenotype	HP:0030084	Clinodactyly			1.57e-07	0.000381	5.44e-05	0.000456	14	320	SOX11,BRIP1,CENPE,CHD7,EZH2,HOXA11,HMGA2,SALL1,FANCI,BUB1,BUB1B,PLAG1,CDC6,PLK4
Human Phenotype	HP:0000340	Sloping forehead			1.91e-07	0.000464	5.8e-05	0.000485	9	108	BRIP1,CENPE,FANCI,BUB1,BUB1B,ASPM,KIF14,PLK4,KIF11
Human Phenotype	HP:0000369	Low-set ears			2.27e-07	0.000552	6.13e-05	0.000514	17	507	COL2A1,MYCN,SOX11,COL13A1,ITGA8,CHD7,EYA1,EZH2,CHRNA1,EDN3,HMGA2,BUB1,BUB1B,KIF14,PLAG1,CDC6,HELLS
Human Phenotype	HP:0000209	Abnormality of the jaws			3.88e-07	0.000943	8.01e-05	0.00067	21	816	COL2A1,MYCN,BRIP1,COL13A1,CENPE,ITGA8,CHD7,EYA1,EZH2,CHRNA1,HMGA2,FANCI,BUB1,BUB1B,KIF14,PLAG1,CDC6,DNA2,PLK4,KIF11,HELLS
Human Phenotype	HP:0030791	Abnormal jaw morphology			3.88e-07	0.000943	8.01e-05	0.00067	21	816	COL2A1,MYCN,BRIP1,COL13A1,CENPE,ITGA8,CHD7,EYA1,EZH2,CHRNA1,HMGA2,FANCI,BUB1,BUB1B,KIF14,PLAG1,CDC6,DNA2,PLK4,KIF11,HELLS
Human Phenotype	HP:0001999	Abnormal facial shape			4.57e-07	0.00111	8.01e-05	0.00067	22	905	COL2A1,MYCN,SOX11,BRIP1,CENPE,ITGA8,KIF4A,CHD7,EYA1,EZH2,CHRNA1,EDN3,MEOX1,HMGA2,SALL1,FANCI,BUB1,BUB1B,PLAG1,CDC6,PLK4,HELLS
Human Phenotype	HP:0004209	Clinodactyly of the 5th finger			5.24e-07	0.00128	8.01e-05	0.00067	12	248	BRIP1,CENPE,CHD7,HOXA11,HMGA2,SALL1,FANCI,BUB1,BUB1B,PLAG1,CDC6,PLK4
Human Phenotype	HP:0001157	Clinodactyly of hands			5.48e-07	0.00133	8.01e-05	0.00067	12	249	BRIP1,CENPE,CHD7,HOXA11,HMGA2,SALL1,FANCI,BUB1,BUB1B,PLAG1,CDC6,PLK4
Human Phenotype	HP:0008678	Renal hypoplasia/aplasia			5.72e-07	0.00139	8.01e-05	0.00067	12	250	SOX11,BRIP1,ITGA8,CHD7,EYA1,CEP55,MEOX1,HMGA2,SALL1,FANCI,ASPM,KIF14
Human Phenotype	HP:0009179	Deviation of the 5th finger			5.72e-07	0.00139	8.01e-05	0.00067	12	250	BRIP1,CENPE,CHD7,HOXA11,HMGA2,SALL1,FANCI,BUB1,BUB1B,PLAG1,CDC6,PLK4
Human Phenotype	HP:0009116	Aplasia/Hypoplasia involving bones of the skull			5.77e-07	0.0014	8.01e-05	0.00067	19	681	COL2A1,MYCN,BRIP1,COL13A1,CENPE,CHD7,EYA1,EZH2,CHRNA1,HMGA2,FANCI,BUB1,BUB1B,KIF14,PLAG1,CDC6,DNA2,PLK4,HELLS
Human Phenotype	HP:0040019	Finger clinodactyly			6.23e-07	0.00152	8.01e-05	0.00067	12	252	BRIP1,CENPE,CHD7,HOXA11,HMGA2,SALL1,FANCI,BUB1,BUB1B,PLAG1,CDC6,PLK4
Human Phenotype	HP:0009466	Radial deviation of finger			6.25e-07	0.00152	8.01e-05	0.00067	13	303	BRIP1,CENPE,CHD7,EZH2,HOXA11,HMGA2,SALL1,FANCI,BUB1,BUB1B,PLAG1,CDC6,PLK4
Human Phenotype	HP:0000357	Abnormal location of ears			6.68e-07	0.00163	8.13e-05	0.00068	17	546	COL2A1,MYCN,SOX11,COL13A1,ITGA8,CHD7,EYA1,EZH2,CHRNA1,EDN3,HMGA2,BUB1,BUB1B,KIF14,PLAG1,CDC6,HELLS
Human Phenotype	HP:0009485	Radial deviation of the hand or of fingers of the hand			7.55e-07	0.00184	8.75e-05	0.000733	13	308	BRIP1,CENPE,CHD7,EZH2,HOXA11,HMGA2,SALL1,FANCI,BUB1,BUB1B,PLAG1,CDC6,PLK4
Human Phenotype	HP:0002247	Duodenal atresia			1.29e-06	0.00315	0.000143	0.0012	5	24	MYCN,CHD7,SALL1,BUB1,BUB1B
Human Phenotype	HP:0011100	Intestinal atresia			1.63e-06	0.00396	0.000166	0.00139	6	45	MYCN,CHD7,EDN3,SALL1,BUB1,BUB1B
Human Phenotype	HP:0000598	Abnormality of the ear			1.64e-06	0.00399	0.000166	0.00139	30	1775	COL2A1,MYCN,SOX11,BRIP1,COL13A1,CENPE,ITGA8,MCM2,CHD7,EYA1,EZH2,CHRNA1,EDN3,SMPX,MEOX1,HOXA11,NEK2,HMGA2,SALL1,LMNB1,FANCI,BUB1,BUB1B,ASPM,KIF14,PLAG1,CDC6,PLK4,KIF11,HELLS
Human Phenotype	HP:0009239	Aplasia/Hypoplasia of the distal phalanx of the 5th finger			2.11e-06	0.00513	0.000205	0.00172	4	12	COL2A1,SOX11,HMGA2,PLAG1
Human Phenotype	HP:0000153	Abnormality of the mouth			2.22e-06	0.00539	0.000207	0.00174	30	1797	COL2A1,MYCN,SOX11,SLC25A21,KIF23,BRIP1,COL13A1,CENPE,ITGA8,TUBB2B,CHD7,EYA1,EZH2,CHRNA1,EDN3,MEOX1,HMGA2,SALL1,NRXN1,FANCI,BUB1,BUB1B,ASPM,KIF14,PLAG1,CDC6,DNA2,PLK4,KIF11,HELLS
Human Phenotype	HP:0009122	Aplasia/hypoplasia affecting bones of the axial skeleton			2.53e-06	0.00615	0.000228	0.00191	19	748	COL2A1,MYCN,BRIP1,COL13A1,CENPE,CHD7,EYA1,EZH2,CHRNA1,HMGA2,FANCI,BUB1,BUB1B,KIF14,PLAG1,CDC6,DNA2,PLK4,HELLS
Human Phenotype	HP:0004097	Deviation of finger			3.03e-06	0.00739	0.000258	0.00216	13	348	BRIP1,CENPE,CHD7,EZH2,HOXA11,HMGA2,SALL1,FANCI,BUB1,BUB1B,PLAG1,CDC6,PLK4
Human Phenotype	HP:0000252	Microcephaly			3.18e-06	0.00774	0.000258	0.00216	20	839	MYCN,SOX11,BRIP1,CENPE,TUBB2B,CHD7,EYA1,EDN3,HMGA2,SALL1,FANCI,BUB1,BUB1B,ASPM,KIF14,PLAG1,CDC6,DNA2,PLK4,KIF11
Human Phenotype	HP:0040195	Decreased head circumference			3.18e-06	0.00774	0.000258	0.00216	20	839	MYCN,SOX11,BRIP1,CENPE,TUBB2B,CHD7,EYA1,EDN3,HMGA2,SALL1,FANCI,BUB1,BUB1B,ASPM,KIF14,PLAG1,CDC6,DNA2,PLK4,KIF11
Human Phenotype	HP:0009376	Aplasia/Hypoplasia of the phalanges of the 5th finger			4.18e-06	0.0102	0.00032	0.00268	5	30	COL2A1,MYCN,SOX11,HMGA2,PLAG1
Human Phenotype	HP:0004225	Abnormality of the distal phalanx of the 5th finger			4.21e-06	0.0103	0.00032	0.00268	4	14	COL2A1,SOX11,HMGA2,PLAG1
Human Phenotype	HP:0009484	Deviation of the hand or of fingers of the hand			5.34e-06	0.013	0.000394	0.0033	13	366	BRIP1,CENPE,CHD7,EZH2,HOXA11,HMGA2,SALL1,FANCI,BUB1,BUB1B,PLAG1,CDC6,PLK4
Human Phenotype	HP:0004213	Abnormal 5th finger phalanx morphology			5.83e-06	0.0142	0.000417	0.0035	5	32	COL2A1,MYCN,SOX11,HMGA2,PLAG1
Human Phenotype	HP:0000142	Abnormal vagina morphology			8.81e-06	0.0215	0.000613	0.00513	9	170	ITGA8,EZH2,EDN3,HMGA2,SALL1,BUB1,BUB1B,KIF14,PLAG1
Human Phenotype	HP:0031105	Abnormal uterus morphology			9.7e-06	0.0236	0.000656	0.00549	9	172	BRIP1,ITGA8,EZH2,AURKA,HMGA2,SALL1,FANCI,BUB1,BUB1B
Human Phenotype	HP:0000240	Abnormality of skull size			1.09e-05	0.0266	0.000716	0.006	23	1175	COL2A1,MYCN,SOX11,BRIP1,CENPE,TUBB2B,CHD7,EYA1,EZH2,EDN3,HMGA2,SALL1,FANCI,BUB1,BUB1B,ASPM,KIF14,PLAG1,CDC6,DNA2,PLK4,KIF11,HELLS
Human Phenotype	HP:0004227	Short distal phalanx of the 5th finger			1.12e-05	0.0272	0.000716	0.006	3	6	COL2A1,HMGA2,PLAG1
Human Phenotype	HP:0009115	Aplasia/hypoplasia involving the skeleton			1.56e-05	0.0379	0.000971	0.00813	22	1105	COL2A1,MYCN,SOX11,BRIP1,COL13A1,CENPE,CHD7,EYA1,EZH2,CHRNA1,NEK2,HMGA2,SALL1,FANCI,BUB1,BUB1B,KIF14,PLAG1,CDC6,DNA2,PLK4,HELLS
Human Phenotype	HP:0009879	Simplified gyral pattern			1.6e-05	0.0388	0.000971	0.00813	5	39	CENPE,TUBB2B,ASPM,PLK4,KIF11
Human Phenotype	HP:0004322	Short stature			1.68e-05	0.0409	0.000998	0.00836	22	1110	COL2A1,SOX11,KIF23,BRIP1,CENPE,TUBB2B,CHD7,EYA1,EDN3,NEK2,HMGA2,SALL1,FANCI,BUB1,BUB1B,ASPM,PLAG1,CDC6,DNA2,PLK4,KIF11,HELLS
Human Phenotype	HP:0010938	Abnormality of the external nose			1.96e-05	0.0477	0.00114	0.0095	17	695	COL2A1,MYCN,SOX11,BRIP1,CENPE,ITGA8,EYA1,CHRNA1,EDN3,NEK2,FANCI,BUB1,BUB1B,KIF14,DNA2,PLK4,KIF11
Human Phenotype	HP:0002244	Abnormality of the small intestine			2.08e-05	0.0505	0.00116	0.00968	10	239	MYCN,BRIP1,CHD7,EZH2,EDN3,HMGA2,SALL1,FANCI,BUB1,BUB1B
Human Phenotype	HP:0011821	Abnormality of facial skeleton			2.09e-05	0.0509	0.00116	0.00968	21	1033	COL2A1,MYCN,BRIP1,COL13A1,CENPE,ITGA8,CHD7,EYA1,EZH2,CHRNA1,HMGA2,FANCI,BUB1,BUB1B,KIF14,PLAG1,CDC6,DNA2,PLK4,KIF11,HELLS
Human Phenotype	HP:0001255	Psychomotor developmental delay			2.76e-05	0.0671	0.00143	0.012	28	1762	COL2A1,MYCN,SOX11,BRIP1,COL13A1,CENPE,KIF4A,TUBB2B,CHD7,EYA1,EZH2,CHRNA1,EDN3,NEK2,HMGA2,SALL1,LMNB1,NRXN1,FANCI,BUB1,BUB1B,ASPM,PLAG1,CDC6,DNA2,PLK4,KIF11,HELLS
Human Phenotype	HP:0005105	Abnormal nasal morphology			2.77e-05	0.0673	0.00143	0.012	18	793	COL2A1,MYCN,SOX11,BRIP1,CENPE,ITGA8,EYA1,CHRNA1,EDN3,NEK2,HMGA2,FANCI,BUB1,BUB1B,KIF14,DNA2,PLK4,KIF11
Human Phenotype	HP:0002589	Gastrointestinal atresia			2.86e-05	0.0696	0.00143	0.012	6	73	MYCN,CHD7,EDN3,SALL1,BUB1,BUB1B
Human Phenotype	HP:0000002	Abnormality of body height			2.88e-05	0.07	0.00143	0.012	23	1241	COL2A1,SOX11,KIF23,BRIP1,CENPE,TUBB2B,CHD7,EYA1,EZH2,EDN3,NEK2,HMGA2,SALL1,FANCI,BUB1,BUB1B,ASPM,PLAG1,CDC6,DNA2,PLK4,KIF11,HELLS
Human Phenotype	HP:0000324	Facial asymmetry			2.92e-05	0.0711	0.00143	0.012	7	109	MYCN,BRIP1,CHD7,EYA1,MEOX1,SALL1,FANCI
Human Phenotype	HP:0000163	Abnormal oral cavity morphology			3e-05	0.0729	0.00143	0.012	27	1657	COL2A1,MYCN,SOX11,SLC25A21,KIF23,BRIP1,COL13A1,CENPE,ITGA8,TUBB2B,CHD7,EYA1,EZH2,CHRNA1,MEOX1,HMGA2,NRXN1,FANCI,BUB1,BUB1B,KIF14,PLAG1,CDC6,DNA2,PLK4,KIF11,HELLS
Human Phenotype	HP:0000286	Epicanthus			3e-05	0.0731	0.00143	0.012	12	365	MYCN,SOX11,BRIP1,ITGA8,CHD7,EZH2,CHRNA1,FANCI,BUB1,BUB1B,KIF11,HELLS
Human Phenotype	HP:0001515	Prenatal growth deficiency			3.18e-05	0.0775	0.00146	0.0123	13	431	SOX11,BRIP1,CENPE,CHD7,CHRNA1,HMGA2,FANCI,BUB1,BUB1B,KIF14,PLAG1,CDC6,PLK4
Human Phenotype	HP:0001511	Intrauterine growth retardation			3.18e-05	0.0775	0.00146	0.0123	13	431	SOX11,BRIP1,CENPE,CHD7,CHRNA1,HMGA2,FANCI,BUB1,BUB1B,KIF14,PLAG1,CDC6,PLK4
Human Phenotype	HP:0002891	Uterine leiomyosarcoma			3.26e-05	0.0794	0.00147	0.0123	5	45	BRIP1,AURKA,HMGA2,BUB1,BUB1B
Human Phenotype	HP:0000130	Abnormality of the uterus			3.77e-05	0.0919	0.00167	0.014	10	256	BRIP1,ITGA8,CHD7,EZH2,AURKA,HMGA2,SALL1,FANCI,BUB1,BUB1B
Human Phenotype	HP:0100667	Brachydactyly (hand)			4.54e-05	0.111	0.00197	0.0165	11	319	COL2A1,MYCN,SOX11,BRIP1,CHD7,EZH2,CHRNA1,HMGA2,SALL1,FANCI,PLAG1
Human Phenotype	HP:0005288	Abnormality of the nares			6.07e-05	0.148	0.00259	0.0217	13	458	COL2A1,MYCN,SOX11,BRIP1,EYA1,NEK2,HMGA2,FANCI,BUB1,BUB1B,KIF14,PLK4,KIF11
Human Phenotype	HP:0008050	Abnormality of the palpebral fissures			6.36e-05	0.155	0.00267	0.0224	14	530	MYCN,SOX11,BRIP1,CENPE,CHD7,EZH2,EDN3,SALL1,FANCI,BUB1,BUB1B,ASPM,PLK4,KIF11
Human Phenotype	HP:0007364	Aplasia/Hypoplasia of the cerebrum			7.12e-05	0.173	0.00294	0.0246	22	1210	MYCN,SOX11,BRIP1,CENPE,TUBB2B,CHD7,EYA1,EDN3,CEP55,HMGA2,SALL1,LMNB1,FANCI,BUB1,BUB1B,ASPM,KIF14,PLAG1,CDC6,DNA2,PLK4,KIF11
Human Phenotype	HP:0100559	Lower limb asymmetry			7.91e-05	0.192	0.00321	0.0269	4	28	COL2A1,HMGA2,SALL1,PLAG1
Human Phenotype	HP:0008364	Abnormality of the calcaneus			9.12e-05	0.222	0.00364	0.0305	4	29	COL2A1,EZH2,HMGA2,PLAG1
Human Phenotype	HP:0001249	Intellectual disability			9.6e-05	0.234	0.00377	0.0316	26	1644	COL2A1,MYCN,SOX11,BRIP1,CENPE,KIF4A,TUBB2B,CHD7,EYA1,EZH2,EDN3,NEK2,HMGA2,SALL1,LMNB1,NRXN1,FANCI,BUB1,BUB1B,ASPM,PLAG1,CDC6,DNA2,PLK4,KIF11,HELLS
Human Phenotype	HP:0001852	Sandal gap			0.000104	0.253	0.00398	0.0333	5	57	CENPE,EZH2,HMGA2,PLAG1,PLK4
Human Phenotype	HP:0100650	Vaginal neoplasm			0.000105	0.254	0.00398	0.0333	4	30	EZH2,HMGA2,BUB1,BUB1B
Human Phenotype	HP:0001274	Agenesis of corpus callosum			0.000109	0.264	0.00407	0.0341	9	233	SOX11,CENPE,TUBB2B,EDN3,SALL1,BUB1,BUB1B,ASPM,KIF14
Human Phenotype	HP:0001167	Abnormality of finger			0.000111	0.27	0.0041	0.0343	18	877	COL2A1,MYCN,SOX11,BRIP1,CENPE,CHD7,EZH2,CHRNA1,EDN3,HOXA11,HMGA2,SALL1,FANCI,BUB1,BUB1B,PLAG1,CDC6,PLK4
Human Phenotype	HP:0011119	Abnormality of the nasal dorsum			0.000118	0.288	0.00429	0.036	8	183	SOX11,CENPE,ITGA8,CHRNA1,BUB1,BUB1B,DNA2,PLK4
Human Phenotype	HP:0010784	Uterine neoplasm			0.00012	0.292	0.00429	0.036	6	94	BRIP1,EZH2,AURKA,HMGA2,BUB1,BUB1B
Human Phenotype	HP:0030669	Abnormal ocular adnexa morphology			0.000138	0.335	0.00486	0.0407	20	1070	MYCN,SOX11,BRIP1,CENPE,ITGA8,TUBB2B,CHD7,EYA1,EZH2,CHRNA1,EDN3,HMGA2,SALL1,FANCI,BUB1,BUB1B,ASPM,PLK4,KIF11,HELLS
Human Phenotype	HP:0000957	Cafe-au-lait spot			0.000151	0.368	0.00526	0.044	6	98	BRIP1,HMGA2,FANCI,BUB1,BUB1B,PLAG1
Human Phenotype	HP:0006989	Dysplastic corpus callosum			0.000155	0.377	0.00531	0.0445	9	244	SOX11,CENPE,TUBB2B,EDN3,SALL1,BUB1,BUB1B,ASPM,KIF14
Human Phenotype	HP:0001560	Abnormality of the amniotic fluid			0.000167	0.405	0.00561	0.047	10	305	COL2A1,MYCN,BRIP1,ITGA8,CHD7,CHRNA1,FANCI,BUB1,BUB1B,KIF14
Human Phenotype	HP:0002977	Aplasia/Hypoplasia involving the central nervous system			0.000168	0.41	0.00561	0.047	22	1276	MYCN,SOX11,BRIP1,CENPE,TUBB2B,CHD7,EYA1,EDN3,CEP55,HMGA2,SALL1,LMNB1,FANCI,BUB1,BUB1B,ASPM,KIF14,PLAG1,CDC6,DNA2,PLK4,KIF11
Human Phenotype	HP:0200006	Slanting of the palpebral fissure			0.000176	0.428	0.00578	0.0484	12	437	MYCN,BRIP1,CENPE,CHD7,EZH2,EDN3,FANCI,BUB1,BUB1B,ASPM,PLK4,KIF11
Human Phenotype	HP:0000175	Cleft palate			0.000189	0.459	0.00612	0.0513	13	511	COL2A1,SOX11,SLC25A21,BRIP1,ITGA8,CHD7,EYA1,CHRNA1,MEOX1,FANCI,BUB1,BUB1B,CDC6
Human Phenotype	HP:0100737	Abnormal hard palate morphology			0.000192	0.468	0.00616	0.0516	13	512	COL2A1,SOX11,SLC25A21,BRIP1,ITGA8,CHD7,EYA1,CHRNA1,MEOX1,FANCI,BUB1,BUB1B,CDC6
Human Phenotype	HP:0000429	Abnormality of the nasal alae			0.000196	0.478	0.00621	0.052	13	513	COL2A1,MYCN,SOX11,BRIP1,EYA1,EDN3,NEK2,FANCI,BUB1,BUB1B,KIF14,PLK4,KIF11
Human Phenotype	HP:0000274	Small face			0.00021	0.511	0.00647	0.0542	6	104	CENPE,CHD7,EYA1,HMGA2,PLAG1,PLK4
Human Phenotype	HP:0000325	Triangular face			0.00021	0.511	0.00647	0.0542	6	104	MYCN,HMGA2,BUB1,BUB1B,PLAG1,CDC6
Human Phenotype	HP:0001562	Oligohydramnios			0.000221	0.539	0.0067	0.0561	6	105	BRIP1,ITGA8,FANCI,BUB1,BUB1B,KIF14
Human Phenotype	HP:0000358	Posteriorly rotated ears			0.000223	0.543	0.0067	0.0561	10	316	MYCN,SOX11,CHD7,EZH2,EDN3,HMGA2,BUB1,BUB1B,PLAG1,CDC6
Human Phenotype	HP:0011297	Abnormal digit morphology			0.00023	0.559	0.00681	0.0571	20	1108	COL2A1,MYCN,SOX11,BRIP1,CENPE,CHD7,EZH2,CHRNA1,EDN3,CEP55,HOXA11,NEK2,HMGA2,SALL1,FANCI,BUB1,BUB1B,PLAG1,CDC6,PLK4
Human Phenotype	HP:0100542	Abnormal localization of kidney			0.000233	0.567	0.00683	0.0572	7	151	SOX11,BRIP1,CHD7,HMGA2,SALL1,FANCI,DNA2
Human Phenotype	HP:0009906	Aplasia/Hypoplasia of the earlobes			0.000241	0.587	0.00691	0.0579	4	37	CENPE,CHD7,CDC6,PLK4
Human Phenotype	HP:0000048	Bifid scrotum			0.000241	0.587	0.00691	0.0579	4	37	CHD7,SALL1,BUB1,BUB1B
Human Phenotype	HP:0002060	Abnormal cerebral morphology			0.000245	0.595	0.00692	0.0579	24	1511	COL2A1,MYCN,SOX11,BRIP1,CENPE,TUBB2B,CHD7,EYA1,EZH2,EDN3,CEP55,HMGA2,SALL1,LMNB1,FANCI,BUB1,BUB1B,ASPM,KIF14,PLAG1,CDC6,DNA2,PLK4,KIF11
Human Phenotype	HP:0100547	Abnormality of forebrain morphology			0.000256	0.623	0.00716	0.0599	24	1515	COL2A1,MYCN,SOX11,BRIP1,CENPE,TUBB2B,CHD7,EYA1,EZH2,EDN3,CEP55,HMGA2,SALL1,LMNB1,FANCI,BUB1,BUB1B,ASPM,KIF14,PLAG1,CDC6,DNA2,PLK4,KIF11
Human Phenotype	HP:0005922	Abnormal hand morphology			0.000288	0.701	0.00796	0.0667	10	326	COL2A1,SOX11,BRIP1,CENPE,CHD7,EZH2,CHRNA1,HMGA2,FANCI,PLAG1
Human Phenotype	HP:0007360	Aplasia/Hypoplasia of the cerebellum			0.000333	0.811	0.00901	0.0755	9	270	SOX11,CENPE,TUBB2B,CHD7,BUB1,BUB1B,ASPM,KIF14,PLK4
Human Phenotype	HP:0000202	Oral cleft			0.000335	0.816	0.00901	0.0755	13	541	COL2A1,SOX11,SLC25A21,BRIP1,ITGA8,CHD7,EYA1,CHRNA1,MEOX1,FANCI,BUB1,BUB1B,CDC6
Human Phenotype	HP:0005266	Intestinal polyp			0.000337	0.82	0.00901	0.0755	5	73	MYCN,EDN3,HMGA2,BUB1,BUB1B
Human Phenotype	HP:0000824	Decreased response to growth hormone stimuation test			0.000347	0.844	0.00914	0.0766	6	114	BRIP1,CHD7,HMGA2,FANCI,PLAG1,DNA2
Human Phenotype	HP:0009381	Short finger			0.000349	0.85	0.00914	0.0766	8	214	COL2A1,SOX11,BRIP1,CHD7,CHRNA1,HMGA2,FANCI,PLAG1
Human Phenotype	HP:0001537	Umbilical hernia			0.000361	0.877	0.00933	0.0782	8	215	COL2A1,BRIP1,CHD7,EZH2,HMGA2,SALL1,FANCI,HELLS
Human Phenotype	HP:0001780	Abnormality of toe			0.000381	0.928	0.00977	0.0818	14	625	COL2A1,MYCN,SOX11,BRIP1,CENPE,CHD7,EZH2,CEP55,HMGA2,SALL1,FANCI,PLAG1,CDC6,PLK4
Human Phenotype	HP:0001291	Abnormal cranial nerve morphology			0.000386	0.94	0.00979	0.082	10	338	MYCN,BRIP1,COL13A1,CHD7,EYA1,CHRNA1,MEOX1,SALL1,FANCI,DNA2
Human Phenotype	HP:0001551	Abnormal umbilicus morphology			0.000409	0.994	0.0102	0.0852	8	219	COL2A1,BRIP1,CHD7,EZH2,HMGA2,SALL1,FANCI,HELLS
Human Phenotype	HP:0009725	Bladder neoplasm			0.000418	1	0.0102	0.0852	6	118	BRIP1,EZH2,AURKA,HMGA2,BUB1,BUB1B
Human Phenotype	HP:0011891	Post-partum hemorrhage			0.000418	1	0.0102	0.0852	2	4	KIF23,HMGA2
Human Phenotype	HP:0010782	Shoulder dimple			0.000418	1	0.0102	0.0852	2	4	HMGA2,PLAG1
Human Phenotype	HP:0008572	External ear malformation			0.000432	1	0.0104	0.0873	5	77	BRIP1,CHD7,EYA1,SALL1,FANCI
Human Phenotype	HP:0001462	Abnormality of external features of the abdomen			0.000448	1	0.0107	0.0895	8	222	COL2A1,BRIP1,CHD7,EZH2,HMGA2,SALL1,FANCI,HELLS
Human Phenotype	HP:0000492	Abnormal eyelid morphology			0.000471	1	0.0109	0.0911	17	889	MYCN,SOX11,BRIP1,CENPE,ITGA8,CHD7,EZH2,CHRNA1,EDN3,SALL1,FANCI,BUB1,BUB1B,ASPM,PLK4,KIF11,HELLS
Human Phenotype	HP:0006716	Hereditary nonpolyposis colorectal carcinoma			0.000475	1	0.0109	0.0911	4	44	BRIP1,AURKA,BUB1,BUB1B
Human Phenotype	HP:0002813	Abnormality of limb bone morphology			0.000482	1	0.0109	0.0911	27	1906	COL2A1,MYCN,SOX11,BRIP1,COL13A1,CENPE,ITGA8,TUBB2B,CHD7,EYA1,EZH2,CHRNA1,EDN3,CEP55,MEOX1,HOXA11,NEK2,HMGA2,SALL1,FANCI,BUB1,BUB1B,KIF14,PLAG1,CDC6,DNA2,PLK4
Human Phenotype	HP:0040068	Abnormality of limb bone			0.000482	1	0.0109	0.0911	27	1906	COL2A1,MYCN,SOX11,BRIP1,COL13A1,CENPE,ITGA8,TUBB2B,CHD7,EYA1,EZH2,CHRNA1,EDN3,CEP55,MEOX1,HOXA11,NEK2,HMGA2,SALL1,FANCI,BUB1,BUB1B,KIF14,PLAG1,CDC6,DNA2,PLK4
Human Phenotype	HP:0040064	Abnormality of limbs			0.000482	1	0.0109	0.0911	27	1906	COL2A1,MYCN,SOX11,BRIP1,COL13A1,CENPE,ITGA8,TUBB2B,CHD7,EYA1,EZH2,CHRNA1,EDN3,CEP55,MEOX1,HOXA11,NEK2,HMGA2,SALL1,FANCI,BUB1,BUB1B,KIF14,PLAG1,CDC6,DNA2,PLK4
Human Phenotype	HP:0002575	Tracheoesophageal fistula			0.000487	1	0.0109	0.0911	5	79	MYCN,BRIP1,ITGA8,CHD7,FANCI
Human Phenotype	HP:0002916	Abnormality of chromosome segregation			0.000487	1	0.0109	0.0911	5	79	BRIP1,FANCI,BUB1,BUB1B,HELLS
Human Phenotype	HP:0000422	Abnormal nasal bridge morphology			0.000527	1	0.0117	0.0977	15	726	COL2A1,MYCN,SOX11,CHD7,EYA1,EZH2,EDN3,NEK2,HMGA2,BUB1,BUB1B,KIF14,PLK4,KIF11,HELLS
Human Phenotype	HP:0002031	Abnormal esophagus morphology			0.000569	1	0.0124	0.104	15	731	MYCN,BRIP1,COL13A1,ITGA8,CHD7,EZH2,CHRNA1,EDN3,HMGA2,SALL1,LMNB1,NRXN1,FANCI,PLAG1,CDC6
Human Phenotype	HP:0000079	Abnormality of the urinary system			0.000569	1	0.0124	0.104	25	1697	MYCN,SOX11,KIF23,BRIP1,ITGA8,CHD7,EYA1,EZH2,EDN3,CEP55,MEOX1,AURKA,NEK2,HMGA2,SALL1,LMNB1,ADGRG2,FANCI,BUB1,BUB1B,ASPM,KIF14,PLAG1,CDC6,DNA2
Human Phenotype	HP:0001159	Syndactyly			0.00058	1	0.0125	0.105	9	291	MYCN,BRIP1,EZH2,CEP55,HOXA11,HMGA2,SALL1,FANCI,PLAG1
Human Phenotype	HP:0011844	Abnormal appendicular skeleton morphology			0.000588	1	0.0125	0.105	27	1926	COL2A1,MYCN,SOX11,BRIP1,COL13A1,CENPE,ITGA8,TUBB2B,CHD7,EYA1,EZH2,CHRNA1,EDN3,CEP55,MEOX1,HOXA11,NEK2,HMGA2,SALL1,FANCI,BUB1,BUB1B,KIF14,PLAG1,CDC6,DNA2,PLK4
Human Phenotype	HP:0000929	Abnormal skull morphology			0.000614	1	0.013	0.109	26	1816	COL2A1,MYCN,SOX11,BRIP1,COL13A1,CENPE,ITGA8,TUBB2B,CHD7,EYA1,EZH2,CHRNA1,EDN3,HMGA2,SALL1,FANCI,BUB1,BUB1B,ASPM,KIF14,PLAG1,CDC6,DNA2,PLK4,KIF11,HELLS
Human Phenotype	HP:0100834	Neoplasm of the large intestine			0.00062	1	0.013	0.109	6	127	MYCN,BRIP1,EZH2,AURKA,BUB1,BUB1B
Human Phenotype	HP:0040069	Abnormal lower limb bone morphology			0.000633	1	0.0131	0.109	13	577	COL2A1,MYCN,SOX11,BRIP1,CENPE,CHD7,EZH2,HMGA2,SALL1,FANCI,KIF14,PLAG1,CDC6
Human Phenotype	HP:0000925	Abnormality of the vertebral column			0.000634	1	0.0131	0.109	20	1190	COL2A1,MYCN,SOX11,BRIP1,COL13A1,CENPE,ITGA8,CHD7,EZH2,CHRNA1,MEOX1,HMGA2,SALL1,NRXN1,FANCI,BUB1,BUB1B,PLAG1,DNA2,PLK4
Human Phenotype	HP:0000582	Upslanted palpebral fissure			0.00068	1	0.0139	0.116	7	180	MYCN,BRIP1,FANCI,BUB1,BUB1B,ASPM,KIF11
Human Phenotype	HP:0007378	Neoplasm of the gastrointestinal tract			0.000683	1	0.0139	0.116	10	363	MYCN,BRIP1,EZH2,EDN3,AURKA,HMGA2,FANCI,BUB1,BUB1B,PLAG1
Human Phenotype	HP:0006849	Hypodysplasia of the corpus callosum			0.000693	1	0.0139	0.117	2	5	BUB1,BUB1B
Human Phenotype	HP:0100736	Abnormal soft palate morphology			0.000702	1	0.0139	0.117	6	130	BRIP1,CHD7,EYA1,FANCI,KIF14,CDC6
Human Phenotype	HP:0001321	Cerebellar hypoplasia			0.000703	1	0.0139	0.117	7	181	CENPE,TUBB2B,BUB1,BUB1B,ASPM,KIF14,PLK4
Human Phenotype	HP:0002577	Abnormal stomach morphology			0.00073	1	0.0143	0.12	12	509	BRIP1,COL13A1,CHD7,EZH2,AURKA,HMGA2,SALL1,NRXN1,BUB1,BUB1B,PLAG1,CDC6
Human Phenotype	HP:0000606	Abnormality of the periorbital region			0.000734	1	0.0143	0.12	18	1013	MYCN,SOX11,BRIP1,CENPE,ITGA8,CHD7,EZH2,CHRNA1,EDN3,HMGA2,SALL1,FANCI,BUB1,BUB1B,ASPM,PLK4,KIF11,HELLS
Human Phenotype	HP:0010787	Genital neoplasm			0.000755	1	0.0146	0.122	8	240	BRIP1,EZH2,AURKA,HMGA2,FANCI,BUB1,BUB1B,PLAG1
Human Phenotype	HP:0009161	Aplasia/Hypoplasia of the middle phalanx of the 5th finger			0.000783	1	0.015	0.126	3	22	MYCN,HMGA2,PLAG1
Human Phenotype	HP:0001549	Abnormal ileum morphology			0.000838	1	0.0158	0.132	4	51	BRIP1,EDN3,HMGA2,FANCI
Human Phenotype	HP:0001850	Abnormality of the tarsal bones			0.000843	1	0.0158	0.132	5	89	COL2A1,EZH2,HMGA2,KIF14,PLAG1
Human Phenotype	HP:0000765	Abnormal thorax morphology			0.000851	1	0.0158	0.132	18	1025	COL2A1,MYCN,SOX11,BRIP1,COL13A1,CHD7,EYA1,EZH2,CHRNA1,EDN3,MEOX1,HMGA2,SALL1,FANCI,BUB1,BUB1B,CDC6,HELLS
Human Phenotype	HP:0000463	Anteverted nares			0.000856	1	0.0158	0.132	11	444	COL2A1,MYCN,BRIP1,EYA1,NEK2,FANCI,BUB1,BUB1B,KIF14,PLK4,KIF11
Human Phenotype	HP:0000427	Upturned nose			0.000856	1	0.0158	0.132	11	444	COL2A1,MYCN,BRIP1,EYA1,NEK2,FANCI,BUB1,BUB1B,KIF14,PLK4,KIF11
Human Phenotype	HP:0006265	Aplasia/Hypoplasia of fingers			0.000865	1	0.0158	0.133	8	245	COL2A1,SOX11,BRIP1,CHD7,CHRNA1,HMGA2,FANCI,PLAG1
Human Phenotype	HP:0001561	Polyhydramnios			0.000882	1	0.0158	0.133	7	188	COL2A1,MYCN,ITGA8,CHD7,CHRNA1,BUB1,BUB1B
Human Phenotype	HP:0004219	Abnormality of the middle phalanx of the 5th finger			0.000895	1	0.0158	0.133	3	23	MYCN,HMGA2,PLAG1
Human Phenotype	HP:0011342	Mild global developmental delay			0.000895	1	0.0158	0.133	3	23	CENPE,CDC6,PLK4
Human Phenotype	HP:0001143	Small eyes			0.000898	1	0.0158	0.133	9	309	BRIP1,CHD7,NEK2,SALL1,FANCI,BUB1,BUB1B,PLK4,KIF11
Human Phenotype	HP:0000568	Microphthalmia			0.000898	1	0.0158	0.133	9	309	BRIP1,CHD7,NEK2,SALL1,FANCI,BUB1,BUB1B,PLK4,KIF11
Human Phenotype	HP:0000159	Abnormal lip morphology			0.000919	1	0.016	0.134	15	764	COL2A1,MYCN,SOX11,ITGA8,CHD7,EYA1,EZH2,MEOX1,HMGA2,BUB1,BUB1B,ASPM,PLAG1,CDC6,KIF11
Human Phenotype	HP:0009774	Triangular shaped phalanges of the hand			0.000925	1	0.016	0.134	6	137	COL2A1,MYCN,BRIP1,EZH2,SALL1,FANCI
Human Phenotype	HP:0000104	Renal agenesis			0.000925	1	0.016	0.134	6	137	ITGA8,CHD7,EYA1,CEP55,ASPM,KIF14
Human Phenotype	HP:0000366	Abnormality of the nose			0.000952	1	0.0163	0.137	21	1325	COL2A1,MYCN,SOX11,BRIP1,CENPE,ITGA8,CHD7,EYA1,EZH2,CHRNA1,EDN3,NEK2,HMGA2,FANCI,BUB1,BUB1B,KIF14,DNA2,PLK4,KIF11,HELLS
Human Phenotype	HP:0000174	Abnormal palate morphology			0.000977	1	0.0166	0.139	16	855	COL2A1,MYCN,SOX11,SLC25A21,BRIP1,COL13A1,ITGA8,CHD7,EYA1,CHRNA1,MEOX1,FANCI,BUB1,BUB1B,KIF14,CDC6
Human Phenotype	HP:0045060	Aplasia/hypoplasia involving bones of the extremities			0.00103	1	0.0167	0.14	14	688	COL2A1,MYCN,SOX11,BRIP1,CENPE,CHD7,EZH2,CHRNA1,NEK2,HMGA2,SALL1,FANCI,PLAG1,CDC6
Human Phenotype	HP:0009825	Aplasia involving bones of the extremities			0.00103	1	0.0167	0.14	14	688	COL2A1,MYCN,SOX11,BRIP1,CENPE,CHD7,EZH2,CHRNA1,NEK2,HMGA2,SALL1,FANCI,PLAG1,CDC6
Human Phenotype	HP:0002834	Flared femoral metaphysis			0.00103	1	0.0167	0.14	2	6	COL2A1,EZH2
Human Phenotype	HP:0030062	Craniopharyngioma			0.00103	1	0.0167	0.14	2	6	HMGA2,PLAG1
Human Phenotype	HP:0002260	Craniofacial dysmorphism			0.00103	1	0.0167	0.14	2	6	HMGA2,PLAG1
Human Phenotype	HP:0030307	Flared lower limb metaphysis			0.00103	1	0.0167	0.14	2	6	COL2A1,EZH2
Human Phenotype	HP:0100684	Salivary gland neoplasm			0.00103	1	0.0167	0.14	2	6	HMGA2,PLAG1
Human Phenotype	HP:0005461	Craniofacial disproportion			0.00103	1	0.0167	0.14	2	6	HMGA2,PLAG1
Human Phenotype	HP:0006740	Transitional cell carcinoma of the bladder			0.00112	1	0.0179	0.15	4	55	BRIP1,AURKA,BUB1,BUB1B
Human Phenotype	HP:0000290	Abnormality of the forehead			0.00112	1	0.0179	0.15	14	694	COL2A1,BRIP1,CENPE,EZH2,HMGA2,FANCI,BUB1,BUB1B,ASPM,KIF14,PLAG1,CDC6,PLK4,KIF11
Human Phenotype	HP:0100243	Leiomyosarcoma			0.00119	1	0.0188	0.157	5	96	BRIP1,AURKA,HMGA2,BUB1,BUB1B
Human Phenotype	HP:0007565	Multiple cafe-au-lait spots			0.0012	1	0.0188	0.157	4	56	BRIP1,FANCI,BUB1,BUB1B
Human Phenotype	HP:0000927	Abnormality of skeletal maturation			0.00129	1	0.02	0.168	9	325	COL2A1,CENPE,CHD7,EYA1,EZH2,HMGA2,PLAG1,CDC6,PLK4
Human Phenotype	HP:0010481	Urethral valve			0.00129	1	0.02	0.168	3	26	HMGA2,SALL1,PLAG1
Human Phenotype	HP:0000069	Abnormality of the ureter			0.00131	1	0.02	0.168	8	261	BRIP1,CHD7,EYA1,HMGA2,SALL1,FANCI,ASPM,PLAG1
Human Phenotype	HP:0001760	Abnormal foot morphology			0.00131	1	0.02	0.168	18	1061	COL2A1,MYCN,SOX11,BRIP1,COL13A1,CENPE,ITGA8,TUBB2B,CHD7,EZH2,CEP55,HMGA2,SALL1,FANCI,KIF14,PLAG1,CDC6,PLK4
Human Phenotype	HP:0100887	Abnormality of globe size			0.00135	1	0.0205	0.172	9	327	BRIP1,CHD7,NEK2,SALL1,FANCI,BUB1,BUB1B,PLK4,KIF11
Human Phenotype	HP:0002672	Gastrointestinal carcinoma			0.00136	1	0.0205	0.172	4	58	BRIP1,AURKA,BUB1,BUB1B
Human Phenotype	HP:0006749	Malignant gastrointestinal tract tumors			0.00136	1	0.0205	0.172	4	58	BRIP1,AURKA,BUB1,BUB1B
Human Phenotype	HP:0006361	Irregular femoral epiphysis			0.00144	1	0.0212	0.177	2	7	COL2A1,CDC6
Human Phenotype	HP:0005490	Postnatal macrocephaly			0.00144	1	0.0212	0.177	2	7	HMGA2,PLAG1
Human Phenotype	HP:0200024	Premature chromatid separation			0.00144	1	0.0212	0.177	2	7	BUB1,BUB1B
Human Phenotype	HP:0001905	Congenital thrombocytopenia			0.00144	1	0.0212	0.177	3	27	BRIP1,HOXA11,FANCI
Human Phenotype	HP:0100555	Asymmetric growth			0.00145	1	0.0212	0.177	4	59	COL2A1,HMGA2,SALL1,PLAG1
Human Phenotype	HP:0002778	Abnormal trachea morphology			0.00148	1	0.0214	0.179	6	150	COL2A1,MYCN,BRIP1,ITGA8,CHD7,FANCI
Human Phenotype	HP:0012718	Morphological abnormality of the gastrointestinal tract			0.00149	1	0.0214	0.179	22	1471	MYCN,KIF23,BRIP1,COL13A1,ITGA8,CHD7,EYA1,EZH2,CHRNA1,EDN3,MEOX1,AURKA,HMGA2,SALL1,LMNB1,NRXN1,FANCI,BUB1,BUB1B,PLAG1,CDC6,HELLS
Human Phenotype	HP:0025033	Abnormality of digestive system morphology			0.00149	1	0.0214	0.179	22	1471	MYCN,KIF23,BRIP1,COL13A1,ITGA8,CHD7,EYA1,EZH2,CHRNA1,EDN3,MEOX1,AURKA,HMGA2,SALL1,LMNB1,NRXN1,FANCI,BUB1,BUB1B,PLAG1,CDC6,HELLS
Human Phenotype	HP:0005584	Renal cell carcinoma			0.00154	1	0.0218	0.183	6	151	BRIP1,EZH2,AURKA,HMGA2,BUB1,BUB1B
Human Phenotype	HP:0005933	Kidney cancer			0.00155	1	0.0218	0.183	7	207	BRIP1,EZH2,AURKA,HMGA2,BUB1,BUB1B,PLAG1
Human Phenotype	HP:0012210	Abnormal renal morphology			0.00155	1	0.0218	0.183	18	1076	SOX11,BRIP1,ITGA8,CHD7,EYA1,EZH2,CEP55,MEOX1,NEK2,HMGA2,SALL1,ADGRG2,FANCI,BUB1,BUB1B,ASPM,KIF14,DNA2
Human Phenotype	HP:0000089	Renal hypoplasia			0.00156	1	0.0218	0.183	5	102	CHD7,CEP55,HMGA2,SALL1,KIF14
Human Phenotype	HP:0000315	Abnormality of the orbital region			0.0016	1	0.0222	0.186	22	1478	COL2A1,MYCN,SOX11,BRIP1,CENPE,ITGA8,TUBB2B,CHD7,EYA1,EZH2,CHRNA1,EDN3,NEK2,HMGA2,SALL1,FANCI,BUB1,BUB1B,ASPM,PLK4,KIF11,HELLS
Human Phenotype	HP:0040073	Abnormal forearm bone morphology			0.00163	1	0.0224	0.187	5	103	COL2A1,BRIP1,CHD7,HOXA11,FANCI
Human Phenotype	HP:0001156	Brachydactyly			0.00164	1	0.0224	0.187	11	480	COL2A1,MYCN,SOX11,BRIP1,CHD7,EZH2,CHRNA1,HMGA2,SALL1,FANCI,PLAG1
Human Phenotype	HP:0011927	Short digit			0.00164	1	0.0224	0.187	11	480	COL2A1,MYCN,SOX11,BRIP1,CHD7,EZH2,CHRNA1,HMGA2,SALL1,FANCI,PLAG1
Human Phenotype	HP:0009815	Aplasia/hypoplasia of the extremities			0.00164	1	0.0224	0.187	14	721	COL2A1,MYCN,SOX11,BRIP1,CENPE,CHD7,EZH2,CHRNA1,NEK2,HMGA2,SALL1,FANCI,PLAG1,CDC6
Human Phenotype	HP:0001991	Aplasia/Hypoplasia of toe			0.0017	1	0.023	0.193	5	104	COL2A1,MYCN,SOX11,CHD7,SALL1
Human Phenotype	HP:0001155	Abnormality of the hand			0.00174	1	0.0234	0.196	18	1086	COL2A1,MYCN,SOX11,BRIP1,CENPE,CHD7,EZH2,CHRNA1,EDN3,HOXA11,HMGA2,SALL1,FANCI,BUB1,BUB1B,PLAG1,CDC6,PLK4
Human Phenotype	HP:0004859	Amegakaryocytic thrombocytopenia			0.00178	1	0.0238	0.2	3	29	BRIP1,HOXA11,FANCI
Human Phenotype	HP:0000047	Hypospadias			0.00183	1	0.0244	0.204	8	275	BRIP1,HMGA2,SALL1,FANCI,BUB1,BUB1B,PLAG1,CDC6
Human Phenotype	HP:0002650	Scoliosis			0.00188	1	0.0248	0.208	14	731	COL2A1,SOX11,BRIP1,CENPE,CHD7,EZH2,CHRNA1,MEOX1,HMGA2,NRXN1,FANCI,PLAG1,DNA2,PLK4
Human Phenotype	HP:0002242	Abnormal intestine morphology			0.0019	1	0.0248	0.208	18	1094	MYCN,KIF23,BRIP1,ITGA8,CHD7,EYA1,EZH2,EDN3,AURKA,HMGA2,SALL1,LMNB1,NRXN1,FANCI,BUB1,BUB1B,PLAG1,HELLS
Human Phenotype	HP:0012412	Premature adrenarche			0.00191	1	0.0248	0.208	2	8	HMGA2,PLAG1
Human Phenotype	HP:0100617	Testicular seminoma			0.00191	1	0.0248	0.208	2	8	HMGA2,PLAG1
Human Phenotype	HP:0000457	Depressed nasal ridge			0.00193	1	0.0248	0.208	5	107	SOX11,ITGA8,CHRNA1,BUB1,BUB1B
Human Phenotype	HP:0000830	Anterior hypopituitarism			0.00194	1	0.0248	0.208	6	158	BRIP1,CHD7,HMGA2,FANCI,PLAG1,DNA2
Human Phenotype	HP:0001034	Hypermelanotic macule			0.00194	1	0.0248	0.208	6	158	BRIP1,HMGA2,FANCI,BUB1,BUB1B,PLAG1
Human Phenotype	HP:0040075	Hypopituitarism			0.002	1	0.0254	0.213	6	159	BRIP1,CHD7,HMGA2,FANCI,PLAG1,DNA2
Human Phenotype	HP:0002750	Delayed skeletal maturation			0.00201	1	0.0254	0.213	8	279	COL2A1,CENPE,CHD7,EYA1,HMGA2,PLAG1,CDC6,PLK4
Human Phenotype	HP:0006753	Neoplasm of the stomach			0.00207	1	0.0261	0.218	6	160	BRIP1,EZH2,AURKA,HMGA2,BUB1,BUB1B
Human Phenotype	HP:0000028	Cryptorchidism			0.00209	1	0.0261	0.219	12	573	SOX11,BRIP1,CHD7,EZH2,EDN3,HMGA2,SALL1,FANCI,BUB1,BUB1B,PLAG1,CDC6
Human Phenotype	HP:0009726	Renal neoplasm			0.00209	1	0.0261	0.219	7	218	BRIP1,EZH2,AURKA,HMGA2,BUB1,BUB1B,PLAG1
Human Phenotype	HP:0000365	Hearing impairment			0.00235	1	0.0292	0.244	19	1211	COL2A1,MYCN,SOX11,BRIP1,MCM2,CHD7,EYA1,EDN3,SMPX,MEOX1,HOXA11,NEK2,SALL1,LMNB1,FANCI,BUB1,BUB1B,ASPM,CDC6
Human Phenotype	HP:0000172	Abnormality of the uvula			0.00236	1	0.0292	0.244	5	112	BRIP1,EYA1,FANCI,KIF14,CDC6
Human Phenotype	HP:0002020	Gastroesophageal reflux			0.00238	1	0.0293	0.245	7	223	COL13A1,CHD7,HMGA2,SALL1,NRXN1,PLAG1,CDC6
Human Phenotype	HP:0100627	Displacement of the urethral meatus			0.0024	1	0.0294	0.246	8	287	BRIP1,HMGA2,SALL1,FANCI,BUB1,BUB1B,PLAG1,CDC6
Human Phenotype	HP:0004979	Metaphyseal sclerosis			0.00244	1	0.0294	0.246	2	9	COL2A1,CENPE
Human Phenotype	HP:0006824	Cranial nerve paralysis			0.00245	1	0.0294	0.246	8	288	BRIP1,COL13A1,CHD7,EYA1,CHRNA1,SALL1,FANCI,DNA2
Human Phenotype	HP:0003022	Hypoplasia of the ulna			0.00246	1	0.0294	0.246	4	68	COL2A1,BRIP1,CHD7,FANCI
Human Phenotype	HP:0040071	Abnormal morphology of ulna			0.00246	1	0.0294	0.246	4	68	COL2A1,BRIP1,CHD7,FANCI
Human Phenotype	HP:0200008	Intestinal polyposis			0.00246	1	0.0294	0.246	4	68	MYCN,EDN3,BUB1,BUB1B
Human Phenotype	HP:0002667	Nephroblastoma			0.00255	1	0.0301	0.252	5	114	EZH2,HMGA2,BUB1,BUB1B,PLAG1
Human Phenotype	HP:0000489	Abnormality of globe location or size			0.00256	1	0.0301	0.252	16	933	COL2A1,BRIP1,ITGA8,CHD7,EZH2,CHRNA1,NEK2,HMGA2,SALL1,FANCI,BUB1,BUB1B,ASPM,PLK4,KIF11,HELLS
Human Phenotype	HP:0011024	Abnormality of the gastrointestinal tract			0.00256	1	0.0301	0.252	22	1527	MYCN,KIF23,BRIP1,COL13A1,ITGA8,CHD7,EYA1,EZH2,CHRNA1,EDN3,MEOX1,AURKA,HMGA2,SALL1,LMNB1,NRXN1,FANCI,BUB1,BUB1B,PLAG1,CDC6,HELLS
Human Phenotype	HP:0002823	Abnormality of femur morphology			0.0027	1	0.0315	0.264	7	228	COL2A1,SOX11,BRIP1,CHD7,EZH2,FANCI,CDC6
Human Phenotype	HP:0200031	macules			0.0027	1	0.0315	0.264	7	228	BRIP1,EDN3,HMGA2,FANCI,BUB1,BUB1B,PLAG1
Human Phenotype	HP:0011794	Embryonal renal neoplasm			0.00275	1	0.0319	0.267	5	116	EZH2,HMGA2,BUB1,BUB1B,PLAG1
Human Phenotype	HP:0005918	Abnormal finger phalanx morphology			0.0028	1	0.0323	0.271	11	513	COL2A1,MYCN,SOX11,BRIP1,CHD7,EZH2,HMGA2,SALL1,FANCI,PLAG1,CDC6
Human Phenotype	HP:0000772	Abnormality of the ribs			0.00284	1	0.0326	0.273	7	230	COL2A1,CHD7,EZH2,CHRNA1,MEOX1,SALL1,CDC6
Human Phenotype	HP:0011355	Localized skin lesion			0.00289	1	0.0328	0.275	14	764	COL2A1,MYCN,BRIP1,CHD7,EYA1,EDN3,NEK2,HMGA2,SALL1,FANCI,BUB1,BUB1B,PLAG1,KIF11
Human Phenotype	HP:0001439	Abnormality of the thigh			0.00291	1	0.0328	0.275	7	231	COL2A1,SOX11,BRIP1,CHD7,EZH2,FANCI,CDC6
Human Phenotype	HP:0001373	Joint dislocation			0.00291	1	0.0328	0.275	8	296	COL2A1,SOX11,BRIP1,EYA1,CHRNA1,HOXA11,FANCI,CDC6
Human Phenotype	HP:0040066	Abnormal morphology of bones of the lower limbs			0.00291	1	0.0328	0.275	8	296	COL2A1,SOX11,BRIP1,CHD7,EZH2,SALL1,FANCI,CDC6
Human Phenotype	HP:0000077	Abnormality of the kidney			0.00303	1	0.0336	0.281	20	1337	SOX11,BRIP1,ITGA8,CHD7,EYA1,EZH2,CEP55,MEOX1,AURKA,NEK2,HMGA2,SALL1,ADGRG2,FANCI,BUB1,BUB1B,ASPM,KIF14,PLAG1,DNA2
Human Phenotype	HP:0008554	Cochlear malformation			0.00304	1	0.0336	0.281	2	10	CHD7,EYA1
Human Phenotype	HP:0009552	Aplasia/Hypoplasia of the phalanges of the 2nd finger			0.00304	1	0.0336	0.281	2	10	COL2A1,MYCN
Human Phenotype	HP:0003221	Chromosomal breakage induced by crosslinking agents			0.00304	1	0.0336	0.281	2	10	BRIP1,FANCI
Human Phenotype	HP:0006494	Aplasia/Hypoplasia involving bones of the feet			0.00306	1	0.0336	0.282	7	233	COL2A1,MYCN,SOX11,CENPE,CHD7,EZH2,SALL1
Human Phenotype	HP:0002814	Abnormality of the lower limb			0.00312	1	0.0342	0.287	20	1340	COL2A1,MYCN,SOX11,BRIP1,COL13A1,CENPE,ITGA8,TUBB2B,CHD7,EYA1,EZH2,CEP55,HOXA11,HMGA2,SALL1,FANCI,KIF14,PLAG1,CDC6,PLK4
Human Phenotype	HP:0005692	Joint hyperflexibility			0.00316	1	0.0345	0.289	6	174	COL2A1,SOX11,CENPE,EZH2,CDC6,PLK4
Human Phenotype	HP:0000275	Narrow face			0.00319	1	0.0345	0.289	4	73	CENPE,CHD7,EYA1,PLK4
Human Phenotype	HP:0000086	Ectopic kidney			0.00319	1	0.0345	0.289	4	73	SOX11,HMGA2,SALL1,DNA2
Human Phenotype	HP:0010460	Abnormality of the female genitalia			0.00335	1	0.0361	0.302	15	865	BRIP1,ITGA8,CHD7,EZH2,EDN3,AURKA,NEK2,HMGA2,SALL1,FANCI,BUB1,BUB1B,KIF14,PLAG1,CDC6
Human Phenotype	HP:0005927	Aplasia/hypoplasia involving bones of the hand			0.00342	1	0.0366	0.307	9	374	COL2A1,SOX11,BRIP1,CENPE,CHD7,CHRNA1,HMGA2,FANCI,PLAG1
Human Phenotype	HP:0000177	Abnormality of upper lip			0.00347	1	0.037	0.31	12	608	COL2A1,SOX11,ITGA8,CHD7,EYA1,EZH2,MEOX1,BUB1,BUB1B,ASPM,CDC6,KIF11
Human Phenotype	HP:0010935	Abnormality of the upper urinary tract			0.00357	1	0.0377	0.316	20	1354	SOX11,BRIP1,ITGA8,CHD7,EYA1,EZH2,CEP55,MEOX1,AURKA,NEK2,HMGA2,SALL1,ADGRG2,FANCI,BUB1,BUB1B,ASPM,KIF14,PLAG1,DNA2
Human Phenotype	HP:0000316	Hypertelorism			0.00357	1	0.0377	0.316	11	529	COL2A1,BRIP1,ITGA8,CHD7,EZH2,CHRNA1,HMGA2,FANCI,BUB1,BUB1B,HELLS
Human Phenotype	HP:0002245	Meckel diverticulum			0.00362	1	0.0377	0.316	3	37	BRIP1,HMGA2,FANCI
Human Phenotype	HP:0012733	Macule			0.00364	1	0.0377	0.316	6	179	BRIP1,HMGA2,FANCI,BUB1,BUB1B,PLAG1
Human Phenotype	HP:0000036	Abnormal penis morphology			0.00366	1	0.0377	0.316	12	612	BRIP1,CHD7,EZH2,NEK2,HMGA2,SALL1,LMNB1,FANCI,BUB1,BUB1B,PLAG1,CDC6
Human Phenotype	HP:0005986	Limitation of neck motion			0.00369	1	0.0377	0.316	2	11	COL2A1,MEOX1
Human Phenotype	HP:0000394	Lop ear			0.00369	1	0.0377	0.316	2	11	CHD7,EYA1
Human Phenotype	HP:0008935	Generalized neonatal hypotonia			0.00369	1	0.0377	0.316	2	11	HMGA2,PLAG1
Human Phenotype	HP:0006495	Aplasia/Hypoplasia of the ulna			0.00369	1	0.0377	0.316	4	76	COL2A1,BRIP1,CHD7,FANCI
Human Phenotype	HP:0009778	Short thumb			0.00369	1	0.0377	0.316	4	76	COL2A1,BRIP1,CHD7,FANCI
Human Phenotype	HP:0006493	Aplasia/hypoplasia involving bones of the lower limbs			0.00373	1	0.0377	0.316	8	308	COL2A1,MYCN,SOX11,CENPE,CHD7,EZH2,SALL1,CDC6
Human Phenotype	HP:0000508	Ptosis			0.00374	1	0.0377	0.316	11	532	COL2A1,MYCN,SOX11,BRIP1,COL13A1,CHD7,EZH2,CHRNA1,FANCI,DNA2,KIF11
Human Phenotype	HP:0001270	Motor delay			0.00374	1	0.0377	0.316	9	379	COL2A1,COL13A1,TUBB2B,CHRNA1,HMGA2,ASPM,PLAG1,CDC6,HELLS
Human Phenotype	HP:0002350	Cerebellar cyst			0.00381	1	0.0383	0.321	5	125	MYCN,SOX11,CHD7,BUB1,BUB1B
Human Phenotype	HP:0010936	Abnormality of the lower urinary tract			0.00384	1	0.0385	0.323	13	700	BRIP1,CHD7,EYA1,EDN3,HMGA2,SALL1,LMNB1,FANCI,BUB1,BUB1B,ASPM,PLAG1,CDC6
Human Phenotype	HP:0009237	Short 5th finger			0.0039	1	0.0388	0.325	3	38	COL2A1,HMGA2,PLAG1
Human Phenotype	HP:0100620	Germinoma			0.0039	1	0.0388	0.325	3	38	BRIP1,HMGA2,PLAG1
Human Phenotype	HP:0000284	Abnormality of the ocular region			0.00392	1	0.0388	0.325	20	1364	COL2A1,MYCN,SOX11,BRIP1,CENPE,ITGA8,CHD7,EZH2,CHRNA1,EDN3,NEK2,HMGA2,SALL1,FANCI,BUB1,BUB1B,ASPM,PLK4,KIF11,HELLS
Human Phenotype	HP:0000494	Downslanted palpebral fissures			0.00396	1	0.039	0.327	8	311	CENPE,CHD7,EZH2,EDN3,BUB1,BUB1B,PLK4,KIF11
Human Phenotype	HP:0009767	Aplasia/Hypoplasia of the phalanges of the hand			0.00414	1	0.0405	0.339	7	246	COL2A1,MYCN,SOX11,EZH2,HMGA2,SALL1,PLAG1
Human Phenotype	HP:0002817	Abnormality of the upper limb			0.00415	1	0.0405	0.339	21	1474	COL2A1,MYCN,SOX11,BRIP1,CENPE,CHD7,EYA1,EZH2,CHRNA1,EDN3,MEOX1,HOXA11,NEK2,HMGA2,SALL1,FANCI,BUB1,BUB1B,PLAG1,CDC6,PLK4
Human Phenotype	HP:0006262	Aplasia/Hypoplasia of the 5th finger			0.00421	1	0.0409	0.343	3	39	COL2A1,HMGA2,PLAG1
Human Phenotype	HP:0011968	Feeding difficulties			0.00437	1	0.0423	0.354	12	625	SOX11,COL13A1,CHD7,EZH2,CHRNA1,EDN3,HMGA2,NRXN1,BUB1,BUB1B,PLAG1,CDC6
Human Phenotype	HP:0100560	Upper limb asymmetry			0.0044	1	0.0423	0.354	2	12	HMGA2,PLAG1
Human Phenotype	HP:0011890	Prolonged bleeding following procedure			0.0044	1	0.0423	0.354	2	12	KIF23,HMGA2
Human Phenotype	HP:0010786	Urinary tract neoplasm			0.00443	1	0.0423	0.354	7	249	BRIP1,EZH2,AURKA,HMGA2,BUB1,BUB1B,PLAG1
Human Phenotype	HP:0010866	Abdominal wall defect			0.00445	1	0.0423	0.354	9	389	COL2A1,BRIP1,CHD7,EZH2,EDN3,HMGA2,SALL1,FANCI,HELLS
Human Phenotype	HP:0100656	Thoracoabdominal wall defect			0.00445	1	0.0423	0.354	9	389	COL2A1,BRIP1,CHD7,EZH2,EDN3,HMGA2,SALL1,FANCI,HELLS
Human Phenotype	HP:0000364	Hearing abnormality			0.00451	1	0.0425	0.356	19	1277	COL2A1,MYCN,SOX11,BRIP1,MCM2,CHD7,EYA1,EDN3,SMPX,MEOX1,HOXA11,NEK2,SALL1,LMNB1,FANCI,BUB1,BUB1B,ASPM,CDC6
Human Phenotype	HP:0005280	Depressed nasal bridge			0.00453	1	0.0425	0.356	9	390	COL2A1,SOX11,CHD7,EYA1,EZH2,BUB1,BUB1B,KIF11,HELLS
Human Phenotype	HP:0000425	Flattened nasal bridge			0.00453	1	0.0425	0.356	9	390	COL2A1,SOX11,CHD7,EYA1,EZH2,BUB1,BUB1B,KIF11,HELLS
Human Phenotype	HP:0000008	Abnormal morphology of female internal genitalia			0.00463	1	0.0433	0.362	14	803	BRIP1,ITGA8,CHD7,EZH2,EDN3,AURKA,NEK2,HMGA2,SALL1,FANCI,BUB1,BUB1B,KIF14,PLAG1
Human Phenotype	HP:0004326	Cachexia			0.00465	1	0.0433	0.362	4	81	CENPE,HMGA2,PLAG1,PLK4
Human Phenotype	HP:0001402	Hepatocellular carcinoma			0.00466	1	0.0433	0.362	5	131	BRIP1,EZH2,HMGA2,FANCI,PLAG1
Human Phenotype	HP:0002143	Abnormality of the spinal cord			0.00475	1	0.0438	0.367	10	469	COL2A1,MYCN,SOX11,BRIP1,EZH2,MEOX1,HMGA2,LMNB1,FANCI,DNA2
Human Phenotype	HP:0002023	Anal atresia			0.00475	1	0.0438	0.367	6	189	BRIP1,CHD7,EDN3,MEOX1,SALL1,FANCI
Human Phenotype	HP:0009602	Abnormality of thumb phalanx			0.00481	1	0.0442	0.37	5	132	COL2A1,BRIP1,EZH2,SALL1,FANCI
Human Phenotype	HP:0003026	Short long bone			0.00488	1	0.0446	0.374	6	190	COL2A1,BRIP1,CHD7,EZH2,SALL1,FANCI
Human Phenotype	HP:0007379	Neoplasm of the genitourinary tract			0.00499	1	0.0455	0.381	8	323	BRIP1,EZH2,AURKA,HMGA2,FANCI,BUB1,BUB1B,PLAG1
Human Phenotype	HP:0000363	Abnormality of earlobe			0.00507	1	0.046	0.386	4	83	CENPE,CHD7,CDC6,PLK4
Human Phenotype	HP:0000368	Low-set, posteriorly rotated ears			0.00513	1	0.0463	0.388	6	192	CHD7,EZH2,HMGA2,BUB1,BUB1B,PLAG1
Human Phenotype	HP:0000387	Absent earlobe			0.00518	1	0.0463	0.388	2	13	CENPE,PLK4
Human Phenotype	HP:0009541	Abnormality of the phalanges of the 2nd finger			0.00518	1	0.0463	0.388	2	13	COL2A1,MYCN
Human Phenotype	HP:0009809	Abnormality of upper limb metaphysis			0.00518	1	0.0463	0.388	2	13	COL2A1,EZH2
Human Phenotype	HP:0000813	Bicornuate uterus			0.00519	1	0.0463	0.388	3	42	BRIP1,ITGA8,FANCI
Human Phenotype	HP:0012745	Short palpebral fissure			0.00529	1	0.047	0.394	4	84	MYCN,SOX11,BRIP1,FANCI
Human Phenotype	HP:0002025	Anal stenosis			0.00555	1	0.0491	0.411	3	43	CHD7,EDN3,SALL1
Mouse Phenotype	MP:0004046	abnormal mitosis			1.86e-16	4.08e-13	4.08e-13	3.37e-12	17	112	NUSAP1,KIF18A,CENPE,BIRC5,EYA1,CEP55,AURKA,FBXO5,BUB1,BUB1B,TPX2,CDC20,CDC25A,DNA2,PLK4,MAD2L1,AURKB
Mouse Phenotype	MP:0003077	abnormal cell cycle			1.35e-15	2.96e-12	1.48e-12	1.22e-11	22	258	FOXM1,NUSAP1,KIF18A,CENPE,MCM2,BIRC5,CHEK1,EYA1,CCNA2,CEP55,AURKA,FBXO5,BUB1,BUB1B,TPX2,ASPM,CDC20,CDC25A,DNA2,PLK4,MAD2L1,AURKB
Mouse Phenotype	MP:0003111	abnormal cell nucleus morphology			1.03e-13	2.25e-10	7.49e-11	6.19e-10	17	162	BRIP1,MCM2,BIRC5,CHEK1,CEP55,AURKA,LMNB1,BUB1,BUB1B,TPX2,CDK1,CDC20,CDC25A,DNA2,MAD2L1,AURKB,HELLS
Mouse Phenotype	MP:0009760	abnormal mitotic spindle morphology			3.24e-13	7.09e-10	1.77e-10	1.47e-09	10	34	NUSAP1,KIF18A,BIRC5,EYA1,AURKA,FBXO5,BUB1,BUB1B,TPX2,AURKB
Mouse Phenotype	MP:0004023	abnormal chromosome number			8.59e-10	1.88e-06	3.76e-07	3.11e-06	10	71	AURKA,BUB1,BUB1B,TPX2,CDC20,CDC25A,DNA2,MAD2L1,AURKB,HELLS
Mouse Phenotype	MP:0009762	abnormal mitotic spindle assembly checkpoint			3.36e-09	7.37e-06	1.23e-06	1.02e-05	5	8	KIF18A,BUB1,BUB1B,TPX2,MAD2L1
Mouse Phenotype	MP:0004024	aneuploidy			1.35e-08	2.95e-05	4.22e-06	3.49e-05	8	49	AURKA,BUB1,BUB1B,TPX2,CDC20,CDC25A,DNA2,MAD2L1
Mouse Phenotype	MP:0013292	embryonic lethality prior to organogenesis			9.62e-08	0.000211	2.64e-05	0.000218	27	953	NUSAP1,CENPE,DTL,SPC25,CENPU,BIRC5,CHEK1,MCM10,RRM2,EZH2,TTK,GINS1,CCNA2,CCNB1,AURKA,FBXO5,NDC80,BUB1,BUB1B,TPX2,CDK1,CDC20,CDC25A,PLK4,TOP2A,MAD2L1,KIF11
Mouse Phenotype	MP:0008932	abnormal embryonic tissue physiology			1.34e-07	0.000294	3.26e-05	0.00027	14	264	NUSAP1,CENPE,CHD7,CHEK1,EYA1,MCM10,EZH2,GINS1,SALL1,BUB1B,CDC20,MAD2L1,KIF11,AURKB
Mouse Phenotype	MP:0008866	chromosomal instability			3.04e-07	0.000666	6.66e-05	0.000551	9	99	BRIP1,CENPE,MCM2,AURKA,BUB1,BUB1B,EXO1,DNA2,MAD2L1
Mouse Phenotype	MP:0010094	abnormal chromosome stability			3.61e-07	0.000792	7.2e-05	0.000595	9	101	BRIP1,CENPE,MCM2,AURKA,BUB1,BUB1B,EXO1,DNA2,MAD2L1
Mouse Phenotype	MP:0004045	abnormal cell cycle checkpoint function			6.67e-07	0.00146	0.000122	0.00101	7	55	KIF18A,CHEK1,BUB1,BUB1B,TPX2,CDC25A,MAD2L1
Mouse Phenotype	MP:0002718	abnormal inner cell mass morphology			9.98e-07	0.00219	0.000162	0.00134	8	84	NUSAP1,BIRC5,MCM10,AURKA,FBXO5,CDC25A,MAD2L1,AURKB
Mouse Phenotype	MP:0013293	embryonic lethality prior to tooth bud stage			1.04e-06	0.00227	0.000162	0.00134	27	1073	NUSAP1,CENPE,DTL,SPC25,CENPU,BIRC5,CHEK1,MCM10,RRM2,EZH2,TTK,GINS1,CCNA2,CCNB1,AURKA,FBXO5,NDC80,BUB1,BUB1B,TPX2,CDK1,CDC20,CDC25A,PLK4,TOP2A,MAD2L1,KIF11
Mouse Phenotype	MP:0013503	abnormal embryonic tissue cell apoptosis			1.34e-06	0.00294	0.000196	0.00162	10	152	NUSAP1,CHEK1,EYA1,MCM10,GINS1,SALL1,BUB1B,CDC20,MAD2L1,AURKB
Mouse Phenotype	MP:0011096	embryonic lethality between implantation and somite formation, complete penetrance			1.68e-06	0.00368	0.00023	0.0019	13	279	CENPE,BIRC5,CHEK1,EZH2,GINS1,CCNA2,BUB1,BUB1B,CDC20,CDC25A,PLK4,MAD2L1,KIF11
Mouse Phenotype	MP:0008762	embryonic lethality			1.84e-06	0.00403	0.000237	0.00196	38	1933	NUSAP1,MYCN,KIF18A,CENPE,PEG10,DTL,SPC25,CENPU,BIRC5,CHD7,CHEK1,MCM10,PRC1,RRM2,EZH2,NCAPH,TTK,GINS1,CCNA2,CCNB1,AURKA,SALL1,FBXO5,NDC80,BUB1,BUB1B,TPX2,CDK1,HAS2,CDC20,CDC25A,DNA2,TMEM100,PLK4,TOP2A,MAD2L1,KIF11,AURKB
Mouse Phenotype	MP:0010297	increased hepatobiliary system tumor incidence			2.36e-06	0.00517	0.000272	0.00225	8	94	FOXM1,AURKA,BUB1,BUB1B,TPX2,CDC20,DNA2,AURKB
Mouse Phenotype	MP:0008019	increased liver tumor incidence			2.36e-06	0.00517	0.000272	0.00225	8	94	FOXM1,AURKA,BUB1,BUB1B,TPX2,CDC20,DNA2,AURKB
Mouse Phenotype	MP:0006205	embryonic lethality between implantation and somite formation			4.34e-06	0.0095	0.000475	0.00393	13	304	CENPE,BIRC5,CHEK1,EZH2,GINS1,CCNA2,BUB1,BUB1B,CDC20,CDC25A,PLK4,MAD2L1,KIF11
Mouse Phenotype	MP:0010296	increased hemolymphoid system tumor incidence			5.57e-06	0.0122	0.000581	0.00481	10	178	BRIP1,MCM2,SUV39H2,AURKA,BUB1,BUB1B,TPX2,EXO1,CDC20,DNA2
Mouse Phenotype	MP:0000358	abnormal cell morphology			7.16e-06	0.0157	0.000713	0.0059	28	1260	KIF18A,BRIP1,MCM2,BIRC5,CHD7,CHEK1,HMMR,ELOVL2,CEP55,AURKA,HOXA11,HMGA2,LMNB1,ADGRG2,CCNE2,BUB1,BUB1B,TPX2,ASPM,EXO1,CDK1,CDC20,CDC25A,DNA2,PLK4,MAD2L1,AURKB,HELLS
Mouse Phenotype	MP:0001648	abnormal apoptosis			9.13e-06	0.02	0.00087	0.0072	26	1131	COL2A1,NUSAP1,MYCN,SOX11,KIF18A,BRIP1,BIRC5,CHD7,CHEK1,EYA1,MCM10,GINS1,CEP55,HOXA11,SALL1,BUB1,BUB1B,EXO1,KIF14,ELAVL4,CDC20,CDC25A,PLK4,MAD2L1,AURKB,HELLS
Mouse Phenotype	MP:0005380	embryo phenotype			9.76e-06	0.0214	0.000891	0.00737	36	1904	COL2A1,NUSAP1,MYCN,CENPE,PEG10,POLE2,UBE2C,DLGAP5,CENPU,BIRC5,CITED1,CHD7,CHEK1,EYA1,MCM10,EZH2,GINS1,EDN3,CCNA2,AURKA,SALL1,FBXO5,LMNB1,BUB1B,TPX2,PLAG1,CDK1,HAS2,CDC20,CDC25A,TMEM100,PLK4,MAD2L1,KIF11,AURKB,HELLS
Mouse Phenotype	MP:0012431	increased lymphoma incidence			1.16e-05	0.0254	0.00102	0.00839	9	153	BRIP1,SUV39H2,AURKA,BUB1,BUB1B,TPX2,EXO1,CDC20,DNA2
Mouse Phenotype	MP:0009850	embryonic lethality between implantation and placentation			1.61e-05	0.0353	0.00136	0.0112	15	451	CENPE,CENPU,BIRC5,CHEK1,MCM10,EZH2,GINS1,CCNA2,BUB1,BUB1B,CDC20,CDC25A,PLK4,MAD2L1,KIF11
Mouse Phenotype	MP:0010274	increased organ/body region tumor incidence			1.75e-05	0.0382	0.00142	0.0117	13	346	FOXM1,BRIP1,MCM2,SUV39H2,AURKA,BUB1,BUB1B,TPX2,EXO1,CDC20,DNA2,MAD2L1,AURKB
Mouse Phenotype	MP:0003706	abnormal cell nucleus count			1.91e-05	0.0419	0.0015	0.0124	4	18	BIRC5,CEP55,CDK1,AURKB
Mouse Phenotype	MP:0013152	abnormal organ/body region tumor incidence			2.03e-05	0.0445	0.00153	0.0127	13	351	FOXM1,BRIP1,MCM2,SUV39H2,AURKA,BUB1,BUB1B,TPX2,EXO1,CDC20,DNA2,MAD2L1,AURKB
Mouse Phenotype	MP:0013504	increased embryonic tissue cell apoptosis			2.21e-05	0.0484	0.00161	0.0134	8	127	CHEK1,EYA1,MCM10,SALL1,BUB1B,CDC20,MAD2L1,AURKB
Mouse Phenotype	MP:0001730	embryonic growth arrest			2.31e-05	0.0507	0.00164	0.0135	12	304	MYCN,CHD7,MCM10,EZH2,GINS1,CCNA2,AURKA,TPX2,CDK1,CDC20,PLK4,KIF11
Mouse Phenotype	MP:0004957	abnormal blastocyst morphology			2.57e-05	0.0563	0.00176	0.0146	10	212	NUSAP1,BIRC5,MCM10,AURKA,FBXO5,BUB1B,CDK1,CDC25A,MAD2L1,AURKB
Mouse Phenotype	MP:0002018	increased malignant tumor incidence			2.79e-05	0.061	0.00185	0.0153	10	214	FOXM1,BRIP1,AURKA,BUB1,BUB1B,TPX2,EXO1,DNA2,MAD2L1,AURKB
Mouse Phenotype	MP:0014137	abnormal preimplantation embryo morphology			3.02e-05	0.0661	0.00194	0.0161	10	216	NUSAP1,BIRC5,MCM10,AURKA,FBXO5,BUB1B,CDK1,CDC25A,MAD2L1,AURKB
Mouse Phenotype	MP:0009781	abnormal preimplantation embryo development			3.28e-05	0.0719	0.00205	0.017	7	98	BIRC5,CHEK1,AURKA,CDK1,CDC20,CDC25A,KIF11
Mouse Phenotype	MP:0002038	increased carcinoma incidence			3.7e-05	0.081	0.00225	0.0186	9	177	FOXM1,BRIP1,AURKA,BUB1,BUB1B,TPX2,DNA2,MAD2L1,AURKB
Mouse Phenotype	MP:0006204	embryonic lethality before implantation			4.22e-05	0.0924	0.0025	0.0207	9	180	DTL,BIRC5,CHEK1,MCM10,AURKA,FBXO5,CDK1,CDC20,KIF11
Mouse Phenotype	MP:0002020	increased tumor incidence			4.89e-05	0.107	0.00282	0.0233	14	438	FOXM1,BRIP1,MCM2,SUV39H2,AURKA,BUB1,BUB1B,TPX2,EXO1,CDC20,CDC25A,DNA2,MAD2L1,AURKB
Mouse Phenotype	MP:0010273	increased classified tumor incidence			5.63e-05	0.123	0.00317	0.0262	12	333	FOXM1,BRIP1,SUV39H2,AURKA,BUB1,BUB1B,TPX2,EXO1,CDC20,DNA2,MAD2L1,AURKB
Mouse Phenotype	MP:0020188	abnormal classified tumor incidence			5.97e-05	0.131	0.00327	0.027	12	335	FOXM1,BRIP1,SUV39H2,AURKA,BUB1,BUB1B,TPX2,EXO1,CDC20,DNA2,MAD2L1,AURKB
Mouse Phenotype	MP:0004979	abnormal neuronal precursor cell number			7.66e-05	0.168	0.0041	0.0339	5	48	BRINP1,CHD7,CEP55,ASPM,NEIL3
Mouse Phenotype	MP:0003693	abnormal blastocyst hatching			9.35e-05	0.205	0.00476	0.0394	5	50	BIRC5,CHEK1,AURKA,CDC25A,KIF11
Mouse Phenotype	MP:0000433	microcephaly			9.35e-05	0.205	0.00476	0.0394	6	80	COL2A1,EYA1,CEP55,LMNB1,ASPM,KIF14
Mouse Phenotype	MP:0000352	decreased cell proliferation			0.000135	0.296	0.00668	0.0552	17	672	COL2A1,FOXM1,KIF18A,BRIP1,CHD7,CHEK1,EYA1,MCM10,EZH2,GINS1,LMNB1,BUB1,TPX2,KIF14,CDC20,MAD2L1,HELLS
Mouse Phenotype	MP:0010380	abnormal inner cell mass apoptosis			0.000137	0.3	0.00668	0.0552	4	29	NUSAP1,CHEK1,GINS1,MAD2L1
Mouse Phenotype	MP:0006042	increased apoptosis			0.000171	0.376	0.00808	0.0669	18	753	COL2A1,MYCN,SOX11,KIF18A,CHD7,CHEK1,EYA1,MCM10,CEP55,SALL1,BUB1B,KIF14,ELAVL4,CDC20,CDC25A,MAD2L1,AURKB,HELLS
Mouse Phenotype	MP:0001672	abnormal embryo development			0.000173	0.38	0.00808	0.0669	23	1113	COL2A1,MYCN,PEG10,POLE2,UBE2C,BIRC5,CHD7,CHEK1,MCM10,EZH2,GINS1,CCNA2,AURKA,FBXO5,BUB1B,TPX2,CDK1,HAS2,CDC20,CDC25A,TMEM100,PLK4,KIF11
Mouse Phenotype	MP:0014134	abnormal embryo morphology			0.00018	0.394	0.00821	0.0679	27	1425	COL2A1,NUSAP1,MYCN,POLE2,CENPU,BIRC5,CHD7,EYA1,MCM10,EZH2,GINS1,EDN3,AURKA,FBXO5,LMNB1,BUB1B,PLAG1,CDK1,HAS2,CDC20,CDC25A,TMEM100,PLK4,MAD2L1,KIF11,AURKB,HELLS
Mouse Phenotype	MP:0000350	abnormal cell proliferation			0.000198	0.434	0.00885	0.0732	23	1123	COL2A1,FOXM1,MYCN,SOX11,KIF18A,BRIP1,CENPE,CHD7,CHEK1,EYA1,MCM10,EZH2,GINS1,LMNB1,BUB1,BUB1B,TPX2,KIF14,NEIL3,CDC20,CDC25A,MAD2L1,HELLS
Mouse Phenotype	MP:0012556	increased cell death			0.000237	0.52	0.0104	0.0859	18	773	COL2A1,MYCN,SOX11,KIF18A,CHD7,CHEK1,EYA1,MCM10,CEP55,SALL1,BUB1B,KIF14,ELAVL4,CDC20,CDC25A,MAD2L1,AURKB,HELLS
Mouse Phenotype	MP:0013651	increased CD11b-low dendritic cell number			0.000252	0.553	0.0108	0.0896	2	3	PCLAF,BACH2
Mouse Phenotype	MP:0010298	increased respiratory system tumor incidence			0.000271	0.593	0.0112	0.0926	6	97	AURKA,BUB1,BUB1B,TPX2,DNA2,MAD2L1
Mouse Phenotype	MP:0008014	increased lung tumor incidence			0.000271	0.593	0.0112	0.0926	6	97	AURKA,BUB1,BUB1B,TPX2,DNA2,MAD2L1
Mouse Phenotype	MP:0009308	increased adenocarcinoma incidence			0.000286	0.627	0.0116	0.0961	6	98	BRIP1,BUB1B,TPX2,DNA2,MAD2L1,AURKB
Mouse Phenotype	MP:0002019	abnormal tumor incidence			0.000368	0.806	0.0147	0.121	14	531	FOXM1,BRIP1,MCM2,SUV39H2,AURKA,BUB1,BUB1B,TPX2,EXO1,CDC20,CDC25A,DNA2,MAD2L1,AURKB
Mouse Phenotype	MP:0003707	increased cell nucleus count			0.000394	0.863	0.0154	0.127	3	16	BIRC5,CEP55,AURKB
Mouse Phenotype	MP:0008714	increased lung carcinoma incidence			0.000431	0.945	0.0166	0.137	5	69	AURKA,BUB1B,TPX2,DNA2,MAD2L1
Mouse Phenotype	MP:0002166	abnormal tumor susceptibility			0.000461	1	0.0174	0.144	14	543	FOXM1,BRIP1,MCM2,SUV39H2,AURKA,BUB1,BUB1B,TPX2,EXO1,CDC20,CDC25A,DNA2,MAD2L1,AURKB
Mouse Phenotype	MP:0010264	increased hepatoma incidence			0.000475	1	0.0176	0.146	3	17	AURKA,CDC20,DNA2
Mouse Phenotype	MP:0011094	embryonic lethality before implantation, complete penetrance			0.000491	1	0.0177	0.146	7	151	DTL,BIRC5,CHEK1,AURKA,FBXO5,CDK1,CDC20
Mouse Phenotype	MP:0013650	abnormal CD11b-low dendritic cell number			0.000502	1	0.0177	0.146	2	4	PCLAF,BACH2
Mouse Phenotype	MP:0004650	increased lumbar vertebrae number			0.000502	1	0.0177	0.146	2	4	HOXA11,HOXD11
Mouse Phenotype	MP:0011496	abnormal head size			0.000508	1	0.0177	0.146	6	109	COL2A1,EYA1,CEP55,LMNB1,ASPM,KIF14
Mouse Phenotype	MP:0002209	decreased germ cell number			0.000527	1	0.0181	0.149	13	486	KIF18A,BRIP1,HMMR,HOXA11,HMGA2,ADGRG2,CCNE2,BUB1,BUB1B,ASPM,EXO1,PLK4,AURKB
Mouse Phenotype	MP:0002088	abnormal embryonic growth/weight/body size			0.000549	1	0.0185	0.153	21	1051	COL2A1,NUSAP1,MYCN,PEG10,UBE2C,CENPU,CHD7,EZH2,AURKA,LMNB1,BUB1B,PLAG1,HAS2,CDC20,CDC25A,TMEM100,PLK4,MAD2L1,KIF11,AURKB,HELLS
Mouse Phenotype	MP:0000313	abnormal cell death			0.000557	1	0.0185	0.153	26	1446	COL2A1,NUSAP1,MYCN,SOX11,KIF18A,BRIP1,BIRC5,CHD7,CHEK1,EYA1,MCM10,GINS1,CEP55,HOXA11,SALL1,BUB1,BUB1B,EXO1,KIF14,ELAVL4,CDC20,CDC25A,PLK4,MAD2L1,AURKB,HELLS
Mouse Phenotype	MP:0003722	absent ureter			0.000566	1	0.0185	0.153	3	18	ITGA8,EYA1,SALL1
Mouse Phenotype	MP:0004966	abnormal inner cell mass proliferation			0.000596	1	0.0192	0.159	5	74	CENPE,CHEK1,EZH2,GINS1,MAD2L1
Mouse Phenotype	MP:0000459	abnormal presacral vertebrae morphology			0.000676	1	0.0215	0.177	8	208	COL2A1,SOX11,CHD7,EYA1,HOXA11,LMNB1,HOXD11,HELLS
Mouse Phenotype	MP:0003694	failure of blastocyst to hatch from the zona pellucida			0.000705	1	0.0221	0.182	4	44	BIRC5,CHEK1,AURKA,KIF11
Mouse Phenotype	MP:0004901	decreased male germ cell number			0.000829	1	0.0247	0.204	12	446	KIF18A,BRIP1,HOXA11,HMGA2,ADGRG2,CCNE2,BUB1,BUB1B,ASPM,EXO1,PLK4,AURKB
Mouse Phenotype	MP:0008161	increased diameter of radius			0.000831	1	0.0247	0.204	2	5	COL2A1,HOXA11
Mouse Phenotype	MP:0008163	increased diameter of ulna			0.000831	1	0.0247	0.204	2	5	COL2A1,HOXA11
Mouse Phenotype	MP:0001410	head bobbing			0.000835	1	0.0247	0.204	4	46	COL2A1,CHD7,EYA1,UNC5C
Mouse Phenotype	MP:0012114	absent inner cell mass proliferation			0.000906	1	0.0265	0.219	4	47	CHEK1,EZH2,GINS1,MAD2L1
Mouse Phenotype	MP:0001698	decreased embryo size			0.000974	1	0.0281	0.232	14	586	COL2A1,NUSAP1,MYCN,CENPU,EZH2,AURKA,LMNB1,PLAG1,CDC20,PLK4,MAD2L1,KIF11,AURKB,HELLS
Mouse Phenotype	MP:0005109	abnormal talus morphology			0.00124	1	0.0344	0.284	2	6	SOX11,HOXA11
Mouse Phenotype	MP:0003164	decreased posterior semicircular canal size			0.00124	1	0.0344	0.284	2	6	CHD7,EYA1
Mouse Phenotype	MP:0012174	flat head			0.00124	1	0.0344	0.284	2	6	LMNB1,KIF14
Mouse Phenotype	MP:0006362	abnormal male germ cell morphology			0.00141	1	0.0385	0.319	14	609	KIF18A,BRIP1,ELOVL2,HOXA11,HMGA2,ADGRG2,CCNE2,BUB1,BUB1B,ASPM,EXO1,CDC20,PLK4,AURKB
Mouse Phenotype	MP:0002208	abnormal germ cell morphology			0.00143	1	0.0385	0.319	15	680	KIF18A,BRIP1,HMMR,ELOVL2,HOXA11,HMGA2,ADGRG2,CCNE2,BUB1,BUB1B,ASPM,EXO1,CDC20,PLK4,AURKB
Mouse Phenotype	MP:0000527	abnormal kidney development			0.00152	1	0.0402	0.332	5	91	MYCN,ITGA8,EYA1,SALL1,SIX2
Mouse Phenotype	MP:0011104	embryonic lethality before implantation, incomplete penetrance			0.00152	1	0.0402	0.332	3	25	MCM10,CDC20,KIF11
Mouse Phenotype	MP:0002027	increased lung adenocarcinoma incidence			0.00164	1	0.042	0.348	4	55	BUB1B,TPX2,DNA2,MAD2L1
Mouse Phenotype	MP:0008716	increased lung non-small cell carcinoma incidence			0.00164	1	0.042	0.348	4	55	BUB1B,TPX2,DNA2,MAD2L1
Mouse Phenotype	MP:0002687	oligozoospermia			0.00165	1	0.042	0.348	8	239	BRIP1,ADGRG2,CCNE2,BUB1,BUB1B,ASPM,EXO1,AURKB
Mouse Phenotype	MP:0000885	ectopic Purkinje cell			0.00171	1	0.042	0.348	3	26	CDK5R1,UNC5C,KIF14
Mouse Phenotype	MP:0003162	decreased lateral semicircular canal size			0.00172	1	0.042	0.348	2	7	CHD7,EYA1
Mouse Phenotype	MP:0009728	abnormal calcaneum morphology			0.00172	1	0.042	0.348	2	7	SOX11,HOXA11
Mouse Phenotype	MP:0002132	abnormal respiratory system morphology			0.00173	1	0.042	0.348	17	840	COL2A1,FOXM1,B3GALT2,MYCN,SOX11,ITGA8,CHD7,EYA1,AURKA,LMNB1,BUB1,BUB1B,LRRTM2,TPX2,DNA2,TMEM100,MAD2L1
Mouse Phenotype	MP:0002006	neoplasm			0.00177	1	0.0426	0.352	14	624	FOXM1,BRIP1,MCM2,SUV39H2,AURKA,BUB1,BUB1B,TPX2,EXO1,CDC20,CDC25A,DNA2,MAD2L1,AURKB
Mouse Phenotype	MP:0004196	abnormal prenatal growth/weight/body size			0.00183	1	0.0436	0.36	22	1235	COL2A1,NUSAP1,MYCN,PEG10,UBE2C,CENPU,CITED1,CHD7,EZH2,AURKA,LMNB1,BUB1B,PLAG1,HAS2,CDC20,CDC25A,TMEM100,PLK4,MAD2L1,KIF11,AURKB,HELLS
Mouse Phenotype	MP:0006032	abnormal ureteric bud morphology			0.00187	1	0.0441	0.364	4	57	ITGA8,EYA1,SALL1,SIX2
Mouse Phenotype	MP:0003331	increased hepatocellular carcinoma incidence			0.00199	1	0.0465	0.384	4	58	FOXM1,BUB1,BUB1B,TPX2
Mouse Phenotype	MP:0011092	embryonic lethality, complete penetrance			0.00209	1	0.0482	0.398	11	431	CHD7,EZH2,NCAPH,CCNB1,AURKA,BUB1,BUB1B,TPX2,CDK1,DNA2,PLK4
Mouse Phenotype	MP:0010985	abnormal kidney mesenchyme morphology			0.00213	1	0.0485	0.401	3	28	MYCN,EYA1,SALL1
Domain	IPR027640	Kinesin-like_fam		InterPro	1.27e-13	9.24e-11	1.7e-11	1.22e-10	10	43	KIF18A,KIF23,CENPE,KIF4A,KIF20A,KIF15,KIF14,KIF18B,KIF11,KIF2C
Domain	PS00411	KINESIN_MOTOR_1		PROSITE	1.64e-13	1.19e-10	1.7e-11	1.22e-10	10	44	KIF18A,KIF23,CENPE,KIF4A,KIF20A,KIF15,KIF14,KIF18B,KIF11,KIF2C
Domain	3.40.850.10	-		Gene3D	1.64e-13	1.19e-10	1.7e-11	1.22e-10	10	44	KIF18A,KIF23,CENPE,KIF4A,KIF20A,KIF15,KIF14,KIF18B,KIF11,KIF2C
Domain	IPR001752	Kinesin_motor_dom		InterPro	1.64e-13	1.19e-10	1.7e-11	1.22e-10	10	44	KIF18A,KIF23,CENPE,KIF4A,KIF20A,KIF15,KIF14,KIF18B,KIF11,KIF2C
Domain	PF00225	Kinesin		Pfam	1.64e-13	1.19e-10	1.7e-11	1.22e-10	10	44	KIF18A,KIF23,CENPE,KIF4A,KIF20A,KIF15,KIF14,KIF18B,KIF11,KIF2C
Domain	PS50067	KINESIN_MOTOR_2		PROSITE	1.64e-13	1.19e-10	1.7e-11	1.22e-10	10	44	KIF18A,KIF23,CENPE,KIF4A,KIF20A,KIF15,KIF14,KIF18B,KIF11,KIF2C
Domain	SM00129	KISc		SMART	1.64e-13	1.19e-10	1.7e-11	1.22e-10	10	44	KIF18A,KIF23,CENPE,KIF4A,KIF20A,KIF15,KIF14,KIF18B,KIF11,KIF2C
Domain	IPR019821	Kinesin_motor_CS		InterPro	3.95e-12	2.87e-09	3.58e-10	2.57e-09	9	41	KIF18A,KIF23,CENPE,KIF4A,KIF20A,KIF14,KIF18B,KIF11,KIF2C
Domain	PF02984	Cyclin_C		Pfam	3.57e-06	0.00259	0.000236	0.00169	4	17	CCNA2,CCNB1,CCNB2,CCNE2
Domain	IPR004367	Cyclin_C-dom		InterPro	3.57e-06	0.00259	0.000236	0.00169	4	17	CCNA2,CCNB1,CCNB2,CCNE2
Domain	SM01332	Cyclin_C		SMART	3.57e-06	0.00259	0.000236	0.00169	4	17	CCNA2,CCNB1,CCNB2,CCNE2
Domain	1.10.472.10	-		Gene3D	5.45e-06	0.00396	0.00033	0.00236	5	40	CCNA2,CCNB1,CDK5R1,CCNB2,CCNE2
Domain	IPR027417	P-loop_NTPase		InterPro	7.57e-06	0.00549	0.000407	0.00292	18	849	KIF18A,KIF23,BRIP1,CENPE,KIF4A,MCM2,CHD7,KIF20A,KIF15,ASPM,KIF14,CDC6,KIF18B,PARPBP,DNA2,KIF11,KIF2C,HELLS
Domain	IPR013763	Cyclin-like		InterPro	7.86e-06	0.0057	0.000407	0.00292	5	43	CCNA2,CCNB1,CDK5R1,CCNB2,CCNE2
Domain	PS00292	CYCLINS		PROSITE	2.91e-05	0.0211	0.00135	0.00968	4	28	CCNA2,CCNB1,CCNB2,CCNE2
Domain	PF08311	Mad3_BUB1_I		Pfam	4.1e-05	0.0297	0.00135	0.00968	2	2	BUB1,BUB1B
Domain	SM00777	Mad3_BUB1_I		SMART	4.1e-05	0.0297	0.00135	0.00968	2	2	BUB1,BUB1B
Domain	IPR031794	HMMR_C		InterPro	4.1e-05	0.0297	0.00135	0.00968	2	2	HMMR,KIF15
Domain	PF15908	HMMR_C		Pfam	4.1e-05	0.0297	0.00135	0.00968	2	2	HMMR,KIF15
Domain	PS51489	BUB1_N		PROSITE	4.1e-05	0.0297	0.00135	0.00968	2	2	BUB1,BUB1B
Domain	IPR015661	Bub1/Mad3		InterPro	4.1e-05	0.0297	0.00135	0.00968	2	2	BUB1,BUB1B
Domain	IPR013212	Mad3/Bub1_I		InterPro	4.1e-05	0.0297	0.00135	0.00968	2	2	BUB1,BUB1B
Domain	IPR006671	Cyclin_N		InterPro	5.67e-05	0.0412	0.00172	0.0123	4	33	CCNA2,CCNB1,CCNB2,CCNE2
Domain	PF00134	Cyclin_N		Pfam	5.67e-05	0.0412	0.00172	0.0123	4	33	CCNA2,CCNB1,CCNB2,CCNE2
Domain	SM00385	CYCLIN		SMART	9.99e-05	0.0725	0.00285	0.0204	4	38	CCNA2,CCNB1,CCNB2,CCNE2
Domain	PS00108	PROTEIN_KINASE_ST		PROSITE	0.000113	0.0821	0.00285	0.0204	10	362	PBK,CHEK1,TTK,AURKA,NEK2,BUB1,BUB1B,CDK1,PLK4,AURKB
Domain	IPR000751	MPI_Phosphatase		InterPro	0.000122	0.0882	0.00285	0.0204	2	3	CDC25A,CDC25C
Domain	PF06617	M-inducer_phosp		Pfam	0.000122	0.0882	0.00285	0.0204	2	3	CDC25A,CDC25C
Domain	PF12045	DUF3528		Pfam	0.000122	0.0882	0.00285	0.0204	2	3	HOXA11,HOXD11
Domain	IPR021918	DUF3528		InterPro	0.000122	0.0882	0.00285	0.0204	2	3	HOXA11,HOXD11
Domain	IPR030616	Aur		InterPro	0.000122	0.0882	0.00285	0.0204	2	3	AURKA,AURKB
Domain	PF00069	Pkinase		Pfam	0.000172	0.125	0.00389	0.0279	10	381	PBK,CHEK1,TTK,AURKA,NEK2,BUB1,BUB1B,CDK1,PLK4,AURKB
Domain	IPR008271	Ser/Thr_kinase_AS		InterPro	0.000489	0.355	0.0108	0.0771	9	357	PBK,CHEK1,TTK,AURKA,NEK2,BUB1,BUB1B,CDK1,AURKB
Domain	SM00220	S_TKc		SMART	0.000509	0.37	0.0109	0.0779	9	359	PBK,CHEK1,TTK,AURKA,NEK2,BUB1,CDK1,PLK4,AURKB
Domain	PS00107	PROTEIN_KINASE_ATP		PROSITE	0.000743	0.539	0.0154	0.11	10	459	PBK,CHEK1,TTK,AURKA,NEK2,BUB1,BUB1B,CDK1,PLK4,AURKB
Domain	IPR020636	Ca/CaM-dep_Ca-dep_prot_Kinase		InterPro	0.001	0.729	0.0202	0.145	4	69	CHEK1,AURKA,PLK4,AURKB
Domain	IPR000719	Prot_kinase_dom		InterPro	0.0012	0.871	0.0235	0.169	10	489	PBK,CHEK1,TTK,AURKA,NEK2,BUB1,BUB1B,CDK1,PLK4,AURKB
Domain	PS50011	PROTEIN_KINASE_DOM		PROSITE	0.00128	0.926	0.0244	0.175	10	493	PBK,CHEK1,TTK,AURKA,NEK2,BUB1,BUB1B,CDK1,PLK4,AURKB
Domain	IPR011009	Kinase-like_dom		InterPro	0.00259	1	0.0316	0.227	10	543	PBK,CHEK1,TTK,AURKA,NEK2,BUB1,BUB1B,CDK1,PLK4,AURKB
Domain	IPR002394	Nicotinic_acetylcholine_rcpt		InterPro	0.0046	1	0.0316	0.227	2	16	CHRNA1,CHRNA5
Domain	IPR026756	NuSAP		InterPro	0.00645	1	0.0316	0.227	1	1	NUSAP1
Domain	PF08234	Spindle_Spc25		Pfam	0.00645	1	0.0316	0.227	1	1	SPC25
Domain	PF09329	zf-primase		Pfam	0.00645	1	0.0316	0.227	1	1	MCM10
Domain	IPR021052	HJURP		InterPro	0.00645	1	0.0316	0.227	1	1	HJURP
Domain	PF12619	MCM2_N		Pfam	0.00645	1	0.0316	0.227	1	1	MCM2
Domain	PF09332	Mcm10		Pfam	0.00645	1	0.0316	0.227	1	1	MCM10
Domain	IPR026851	Dna2		InterPro	0.00645	1	0.0316	0.227	1	1	DNA2
Domain	PF08696	Dna2		Pfam	0.00645	1	0.0316	0.227	1	1	DNA2
Domain	PF12719	Cnd3		Pfam	0.00645	1	0.0316	0.227	1	1	NCAPG
Domain	PF13931	Microtub_bind		Pfam	0.00645	1	0.0316	0.227	1	1	KIF11
Domain	PD352676	PD352676		ProDom	0.00645	1	0.0316	0.227	1	1	SMPX
Domain	IPR008045	MCM2		InterPro	0.00645	1	0.0316	0.227	1	1	MCM2
Domain	IPR032384	Kif23_Arf-bd		InterPro	0.00645	1	0.0316	0.227	1	1	KIF23
Domain	IPR025977	Cnd3_C		InterPro	0.00645	1	0.0316	0.227	1	1	NCAPG
Domain	IPR033223	TTMP		InterPro	0.00645	1	0.0316	0.227	1	1	C3orf52
Domain	IPR024639	DNA_pol_e_bsu_N		InterPro	0.00645	1	0.0316	0.227	1	1	POLE2
Domain	IPR033696	POLO_box_Plk4_C		InterPro	0.00645	1	0.0316	0.227	1	1	PLK4
Domain	IPR033699	POLO_box_Plk4_1		InterPro	0.00645	1	0.0316	0.227	1	1	PLK4
Domain	IPR033698	POLO_box_Plk4_2		InterPro	0.00645	1	0.0316	0.227	1	1	PLK4
Domain	IPR014808	DNA_replication_fac_Dna2_N		InterPro	0.00645	1	0.0316	0.227	1	1	DNA2
Domain	PF09041	Aurora-A_bind		Pfam	0.00645	1	0.0316	0.227	1	1	TPX2
Domain	IPR033680	ELOVL2		InterPro	0.00645	1	0.0316	0.227	1	1	ELOVL2
Domain	PF12213	Dpoe2NT		Pfam	0.00645	1	0.0316	0.227	1	1	POLE2
Domain	PF12214	TPX2_importin		Pfam	0.00645	1	0.0316	0.227	1	1	TPX2
Domain	PF15715	PAF		Pfam	0.00645	1	0.0316	0.227	1	1	PCLAF
Domain	PF12346	HJURP_mid		Pfam	0.00645	1	0.0316	0.227	1	1	HJURP
Domain	IPR009675	TPX2_fam		InterPro	0.00645	1	0.0316	0.227	1	1	TPX2
Domain	IPR007257	GINS_Psf2		InterPro	0.00645	1	0.0316	0.227	1	1	GINS2
Domain	PF13401	AAA_22		Pfam	0.00645	1	0.0316	0.227	1	1	CDC6
Domain	IPR022778	CDKN3		InterPro	0.00645	1	0.0316	0.227	1	1	CDKN3
Domain	PF10490	CENP-F_C_Rb_bdg		Pfam	0.00645	1	0.0316	0.227	1	1	CENPF
Domain	IPR027097	Mad2		InterPro	0.00645	1	0.0316	0.227	1	1	MAD2L1
Domain	PF10384	Scm3		Pfam	0.00645	1	0.0316	0.227	1	1	HJURP
Domain	IPR032447	Cyclin-A_N		InterPro	0.00645	1	0.0316	0.227	1	1	CCNA2
Domain	IPR029268	Chisel		InterPro	0.00645	1	0.0316	0.227	1	1	SMPX
Domain	IPR027084	Dual_sp_prot_kinse_Ttk		InterPro	0.00645	1	0.0316	0.227	1	1	TTK
Domain	PF10473	CENP-F_leu_zip		Pfam	0.00645	1	0.0316	0.227	1	1	CENPF
Domain	IPR025901	Kinesin-assoc_MT-bd_dom		InterPro	0.00645	1	0.0316	0.227	1	1	KIF11
Domain	PF10481	CENP-F_N		Pfam	0.00645	1	0.0316	0.227	1	1	CENPF
Domain	IPR008425	CDK_inhib_3		InterPro	0.00645	1	0.0316	0.227	1	1	CDKN3
Domain	IPR032536	TMEM100		InterPro	0.00645	1	0.0316	0.227	1	1	TMEM100
Domain	IPR031444	PCNA-AF		InterPro	0.00645	1	0.0316	0.227	1	1	PCLAF
Domain	IPR018465	Scm3/HJURP		InterPro	0.00645	1	0.0316	0.227	1	1	HJURP
Domain	IPR018463	Centromere_CenpF_N		InterPro	0.00645	1	0.0316	0.227	1	1	CENPF
Domain	PF03801	Ndc80_HEC		Pfam	0.00645	1	0.0316	0.227	1	1	NDC80
Domain	IPR032641	Exo1		InterPro	0.00645	1	0.0316	0.227	1	1	EXO1
Domain	PF15905	HMMR_N		Pfam	0.00645	1	0.0316	0.227	1	1	HMMR
Domain	IPR027165	CND3		InterPro	0.00645	1	0.0316	0.227	1	1	NCAPG
Domain	IPR028371	HAS2		InterPro	0.00645	1	0.0316	0.227	1	1	HAS2
Domain	IPR031787	HMMR_N		InterPro	0.00645	1	0.0316	0.227	1	1	HMMR
Domain	IPR016266	DNA_pol_e_bsu		InterPro	0.00645	1	0.0316	0.227	1	1	POLE2
Domain	PF16540	MKLP1_Arf_bdg		Pfam	0.00645	1	0.0316	0.227	1	1	KIF23
Domain	IPR029693	TMEM35		InterPro	0.00645	1	0.0316	0.227	1	1	TMEM35A
Domain	IPR032989	Contactin-5		InterPro	0.00645	1	0.0316	0.227	1	1	CNTN5
Domain	IPR026171	FANCI		InterPro	0.00645	1	0.0316	0.227	1	1	FANCI
Domain	IPR028471	Eyes_absent_h1		InterPro	0.00645	1	0.0316	0.227	1	1	EYA1
Domain	IPR022816	Condensin_barren_su2		InterPro	0.00645	1	0.0316	0.227	1	1	NCAPH
Domain	IPR018302	CenpF/LEK1_Rb-prot-bd		InterPro	0.00645	1	0.0316	0.227	1	1	CENPF
Domain	IPR019513	Centromere_CenpF_leu-rich_rpt		InterPro	0.00645	1	0.0316	0.227	1	1	CENPF
Domain	IPR033700	Plk4		InterPro	0.00645	1	0.0316	0.227	1	1	PLK4
Domain	IPR029312	FANCI_HD2		InterPro	0.00645	1	0.0316	0.227	1	1	FANCI
Domain	IPR029313	FANCI_S3		InterPro	0.00645	1	0.0316	0.227	1	1	FANCI
Domain	IPR028466	Top2a		InterPro	0.00645	1	0.0316	0.227	1	1	TOP2A
Domain	IPR029314	FANCI_S4		InterPro	0.00645	1	0.0316	0.227	1	1	FANCI
Domain	IPR029315	FANCI_S2		InterPro	0.00645	1	0.0316	0.227	1	1	FANCI
Domain	IPR029551	SOX-11		InterPro	0.00645	1	0.0316	0.227	1	1	SOX11
Domain	IPR029310	FANCI_HD1		InterPro	0.00645	1	0.0316	0.227	1	1	FANCI
Domain	IPR029305	FANCI_S1-cap		InterPro	0.00645	1	0.0316	0.227	1	1	FANCI
Domain	IPR005339	GINS_Psf1		InterPro	0.00645	1	0.0316	0.227	1	1	GINS1
Domain	IPR029308	FANCI_S1		InterPro	0.00645	1	0.0316	0.227	1	1	FANCI
Domain	PF14679	FANCI_HD1		Pfam	0.00645	1	0.0316	0.227	1	1	FANCI
Domain	PF14678	FANCI_S4		Pfam	0.00645	1	0.0316	0.227	1	1	FANCI
Domain	PF14677	FANCI_S3		Pfam	0.00645	1	0.0316	0.227	1	1	FANCI
Domain	PF14676	FANCI_S2		Pfam	0.00645	1	0.0316	0.227	1	1	FANCI
Domain	PF14675	FANCI_S1		Pfam	0.00645	1	0.0316	0.227	1	1	FANCI
Domain	PF14674	FANCI_S1-cap		Pfam	0.00645	1	0.0316	0.227	1	1	FANCI
Domain	PF14680	FANCI_HD2		Pfam	0.00645	1	0.0316	0.227	1	1	FANCI
Domain	PF16500	Cyclin_N2		Pfam	0.00645	1	0.0316	0.227	1	1	CCNA2
Domain	IPR005550	Kinetochore_Ndc80		InterPro	0.00645	1	0.0316	0.227	1	1	NDC80
Domain	PF05706	CDKN3		Pfam	0.00645	1	0.0316	0.227	1	1	CDKN3
Domain	IPR027330	TPX2_central_dom		InterPro	0.00645	1	0.0316	0.227	1	1	TPX2
Domain	IPR032924	KIF23		InterPro	0.00645	1	0.0316	0.227	1	1	KIF23
Domain	IPR015128	Aurora-A-bd		InterPro	0.00645	1	0.0316	0.227	1	1	TPX2
Domain	IPR032921	PRC1		InterPro	0.00645	1	0.0316	0.227	1	1	PRC1
Domain	IPR027326	KIF20A		InterPro	0.00645	1	0.0316	0.227	1	1	KIF20A
Domain	IPR028772	AURKB		InterPro	0.00645	1	0.0316	0.227	1	1	AURKB
Domain	IPR030611	AURKA		InterPro	0.00645	1	0.0316	0.227	1	1	AURKA
Domain	IPR027329	TPX2_C		InterPro	0.00645	1	0.0316	0.227	1	1	TPX2
Domain	IPR016314	Cdc6/18		InterPro	0.00645	1	0.0316	0.227	1	1	CDC6
Domain	SM01280	Mcm10		SMART	0.00645	1	0.0316	0.227	1	1	MCM10
Domain	IPR013255	Spc25		InterPro	0.00645	1	0.0316	0.227	1	1	SPC25
Domain	PF13097	CENP-U		Pfam	0.00645	1	0.0316	0.227	1	1	CENPU
Domain	IPR029955	ASPM		InterPro	0.00645	1	0.0316	0.227	1	1	ASPM
Domain	IPR026203	IHABP		InterPro	0.00645	1	0.0316	0.227	1	1	HMMR
Domain	PF16006	NUSAP		Pfam	0.00645	1	0.0316	0.227	1	1	NUSAP1
Domain	IPR029824	Neurexin-1		InterPro	0.00645	1	0.0316	0.227	1	1	NRXN1
Domain	IPR027765	PLAG1		InterPro	0.00645	1	0.0316	0.227	1	1	PLAG1
Domain	IPR015411	Rep_factor_Mcm10_C		InterPro	0.00645	1	0.0316	0.227	1	1	MCM10
Domain	IPR025214	CENP-U		InterPro	0.00645	1	0.0316	0.227	1	1	CENPU
Domain	IPR026549	FZD10		InterPro	0.00645	1	0.0316	0.227	1	1	FZD10
Domain	IPR033066	CENP-E		InterPro	0.00645	1	0.0316	0.227	1	1	CENPE
Domain	IPR033187	CDC20		InterPro	0.00645	1	0.0316	0.227	1	1	CDC20
Domain	PF16311	TMEM100		Pfam	0.00645	1	0.0316	0.227	1	1	TMEM100
Domain	PF05786	Cnd2		Pfam	0.00645	1	0.0316	0.227	1	1	NCAPH
Domain	IPR015408	Znf_Mcm10/DnaG		InterPro	0.00645	1	0.0316	0.227	1	1	MCM10
Domain	PF15355	Chisel		Pfam	0.00645	1	0.0316	0.227	1	1	SMPX
Domain	IPR015887	DNA_glyclase_Znf_dom_DNA_BS		InterPro	0.00645	1	0.0316	0.227	1	1	NEIL3
Domain	PF06886	TPX2		Pfam	0.00645	1	0.0316	0.227	1	1	TPX2
Domain	1.10.196.10	-		Gene3D	0.00864	1	0.0408	0.292	2	22	RGS7,RGS17
Domain	PF00610	DEP		Pfam	0.00864	1	0.0408	0.292	2	22	DEPDC1,RGS7
Domain	SM00450	RHOD		SMART	0.00864	1	0.0408	0.292	2	22	CDC25A,CDC25C
Domain	PS50186	DEP		PROSITE	0.00864	1	0.0408	0.292	2	22	DEPDC1,RGS7
Domain	IPR024066	RGS_subdom1		InterPro	0.00864	1	0.0408	0.292	2	22	RGS7,RGS17
Domain	SM00049	DEP		SMART	0.00864	1	0.0408	0.292	2	22	DEPDC1,RGS7
Domain	IPR000591	DEP_dom		InterPro	0.00943	1	0.0421	0.302	2	23	DEPDC1,RGS7
Domain	1.20.120.370	-		Gene3D	0.00943	1	0.0421	0.302	2	23	CHRNA1,CHRNA5
Domain	PS50206	RHODANESE_3		PROSITE	0.00943	1	0.0421	0.302	2	23	CDC25A,CDC25C
Domain	IPR027361	Acetylcholine_rcpt_TM		InterPro	0.00943	1	0.0421	0.302	2	23	CHRNA1,CHRNA5
Domain	IPR023780	Chromo_domain		InterPro	0.0102	1	0.0421	0.302	2	24	CHD7,SUV39H2
Domain	IPR001763	Rhodanese-like_dom		InterPro	0.0102	1	0.0421	0.302	2	24	CDC25A,CDC25C
Domain	PF00581	Rhodanese		Pfam	0.0102	1	0.0421	0.302	2	24	CDC25A,CDC25C
Domain	3.40.250.10	-		Gene3D	0.0102	1	0.0421	0.302	2	24	CDC25A,CDC25C
Domain	IPR017441	Protein_kinase_ATP_BS		InterPro	0.0111	1	0.0421	0.302	7	379	CHEK1,TTK,AURKA,BUB1,CDK1,PLK4,AURKB
Domain	PF00385	Chromo		Pfam	0.012	1	0.0421	0.302	2	26	CHD7,SUV39H2
Domain	IPR012348	RNR-rel		InterPro	0.0128	1	0.0421	0.302	1	2	RRM2
Domain	PF00521	DNA_topoisoIV		Pfam	0.0128	1	0.0421	0.302	1	2	TOP2A
Domain	IPR011381	Histone_H3-K9_MeTrfase		InterPro	0.0128	1	0.0421	0.302	1	2	SUV39H2
Domain	PF11616	EZH2_WD-Binding		Pfam	0.0128	1	0.0421	0.302	1	2	EZH2
Domain	IPR004944	CDK5_activator		InterPro	0.0128	1	0.0421	0.302	1	2	CDK5R1
Domain	IPR022008	EABR		InterPro	0.0128	1	0.0421	0.302	1	2	CEP55
Domain	IPR000358	RNR_small_fam		InterPro	0.0128	1	0.0421	0.302	1	2	RRM2
Domain	1.10.620.20	-		Gene3D	0.0128	1	0.0421	0.302	1	2	RRM2
Domain	IPR013758	Topo_IIA_A/C_ab		InterPro	0.0128	1	0.0421	0.302	1	2	TOP2A
Domain	IPR013757	Topo_IIA_A_a		InterPro	0.0128	1	0.0421	0.302	1	2	TOP2A
Domain	IPR013759	Topo_IIA_cen_dom		InterPro	0.0128	1	0.0421	0.302	1	2	TOP2A
Domain	3.40.50.670	-		Gene3D	0.0128	1	0.0421	0.302	1	2	TOP2A
Domain	IPR012542	DTHCT		InterPro	0.0128	1	0.0421	0.302	1	2	TOP2A
Domain	SM00434	TOP4c		SMART	0.0128	1	0.0421	0.302	1	2	TOP2A
Domain	SM00433	TOP2c		SMART	0.0128	1	0.0421	0.302	1	2	TOP2A
Domain	IPR013760	Topo_IIA-like_dom		InterPro	0.0128	1	0.0421	0.302	1	2	TOP2A
Domain	IPR013506	Topo_IIA_bsu_dom2		InterPro	0.0128	1	0.0421	0.302	1	2	TOP2A
Domain	PF08070	DTHCT		Pfam	0.0128	1	0.0421	0.302	1	2	TOP2A
Domain	PS51066	ZF_FPG_2		PROSITE	0.0128	1	0.0421	0.302	1	2	NEIL3
Domain	PF00204	DNA_gyraseB		Pfam	0.0128	1	0.0421	0.302	1	2	TOP2A
Domain	IPR007145	MAP65_Ase1_PRC1		InterPro	0.0128	1	0.0421	0.302	1	2	PRC1
Domain	1.10.268.10	-		Gene3D	0.0128	1	0.0421	0.302	1	2	TOP2A
Domain	IPR021654	EZH1/EZH2		InterPro	0.0128	1	0.0421	0.302	1	2	EZH2
Domain	IPR030475	RNR_small_AS		InterPro	0.0128	1	0.0421	0.302	1	2	RRM2
Domain	PF14822	Vasohibin		Pfam	0.0128	1	0.0421	0.302	1	2	VASH2
Domain	PS51579	SAM_MT43_SUVAR39_3		PROSITE	0.0128	1	0.0421	0.302	1	2	SUV39H2
Domain	IPR028131	Vasohibin		InterPro	0.0128	1	0.0421	0.302	1	2	VASH2
Domain	IPR031660	TOPRIM_C		InterPro	0.0128	1	0.0421	0.302	1	2	TOP2A
Domain	PF16898	TOPRIM_C		Pfam	0.0128	1	0.0421	0.302	1	2	TOP2A
Domain	IPR031549	ASH		InterPro	0.0128	1	0.0421	0.302	1	2	ASPM
Domain	3.90.199.10	-		Gene3D	0.0128	1	0.0421	0.302	1	2	TOP2A
Domain	PF12180	EABR		Pfam	0.0128	1	0.0421	0.302	1	2	CEP55
Domain	PF15782	GREB1		Pfam	0.0128	1	0.0421	0.302	1	2	GREB1
Domain	PF15780	ASH		Pfam	0.0128	1	0.0421	0.302	1	2	ASPM
Domain	IPR015163	Cdc6_C		InterPro	0.0128	1	0.0421	0.302	1	2	CDC6
Domain	SM01074	Cdc6_C		SMART	0.0128	1	0.0421	0.302	1	2	CDC6
Domain	IPR018522	TopoIIA_CS		InterPro	0.0128	1	0.0421	0.302	1	2	TOP2A
Domain	PF13564	DoxX_2		Pfam	0.0128	1	0.0421	0.302	1	2	TMEM35A
Domain	PS51793	MIS18		PROSITE	0.0128	1	0.0421	0.302	1	2	OIP5
Domain	IPR033909	RNR_small		InterPro	0.0128	1	0.0421	0.302	1	2	RRM2
Domain	IPR027696	Lamin_B		InterPro	0.0128	1	0.0421	0.302	1	2	LMNB1
Domain	IPR028422	GREB1		InterPro	0.0128	1	0.0421	0.302	1	2	GREB1
Domain	IPR026489	CXC_dom		InterPro	0.0128	1	0.0421	0.302	1	2	EZH2
Domain	PF09079	Cdc6_C		Pfam	0.0128	1	0.0421	0.302	1	2	CDC6
Domain	PF00268	Ribonuc_red_sm		Pfam	0.0128	1	0.0421	0.302	1	2	RRM2
Domain	IPR032808	DoxX		InterPro	0.0128	1	0.0421	0.302	1	2	TMEM35A
Domain	IPR015453	Cyclin_A2_chordates		InterPro	0.0128	1	0.0421	0.302	1	2	CCNA2
Domain	PS01242	ZF_FPG_1		PROSITE	0.0128	1	0.0421	0.302	1	2	NEIL3
Domain	PS51633	CXC		PROSITE	0.0128	1	0.0421	0.302	1	2	EZH2
Domain	PS00368	RIBORED_SMALL		PROSITE	0.0128	1	0.0421	0.302	1	2	RRM2
Domain	PF03261	CDK5_activator		Pfam	0.0128	1	0.0421	0.302	1	2	CDK5R1
Domain	IPR028858	Cyclin_E		InterPro	0.0128	1	0.0421	0.302	1	2	CCNE2
Domain	IPR004768	Oligopep_transport		InterPro	0.0128	1	0.0421	0.302	1	2	SLC15A1
Domain	IPR002205	Topo_IIA_A/C		InterPro	0.0128	1	0.0421	0.302	1	2	TOP2A
Domain	IPR001241	Topo_IIA		InterPro	0.0128	1	0.0421	0.302	1	2	TOP2A
Domain	PS00177	TOPOISOMERASE_II		PROSITE	0.0128	1	0.0421	0.302	1	2	TOP2A
Domain	PS00598	CHROMO_1		PROSITE	0.0138	1	0.0451	0.323	2	28	CHD7,SUV39H2
Domain	PS50013	CHROMO_2		PROSITE	0.0138	1	0.0451	0.323	2	28	CHD7,SUV39H2
Pathway	1269741	Cell Cycle	1	BioSystems: REACTOME	5.9e-36	4.05e-33	4.05e-33	2.88e-32	47	624	FOXM1,KIF18A,KIF23,BRIP1,CENPE,CENPF,POLE2,UBE2C,HJURP,SPC25,CENPU,MCM2,OIP5,BIRC5,CHEK1,HMMR,MCM10,RRM2,NCAPH,GINS1,CCNA2,CCNB1,KIF20A,AURKA,NEK2,NCAPG,FBXO5,LMNB1,NDC80,CCNB2,CCNE2,BUB1,BUB1B,TPX2,EXO1,GINS2,CDK1,CDC6,CDC20,CDC25A,CDC25C,DNA2,PLK4,TOP2A,MAD2L1,AURKB,KIF2C
Pathway	1269763	Cell Cycle, Mitotic	1	BioSystems: REACTOME	4.12e-33	2.83e-30	1.41e-30	1.01e-29	42	517	FOXM1,KIF18A,KIF23,CENPE,CENPF,POLE2,UBE2C,SPC25,CENPU,MCM2,BIRC5,HMMR,MCM10,RRM2,NCAPH,GINS1,CCNA2,CCNB1,KIF20A,AURKA,NEK2,NCAPG,FBXO5,LMNB1,NDC80,CCNB2,CCNE2,BUB1,BUB1B,TPX2,GINS2,CDK1,CDC6,CDC20,CDC25A,CDC25C,DNA2,PLK4,TOP2A,MAD2L1,AURKB,KIF2C
Pathway	M129	PLK1 signaling events		MSigDB C2 BIOCARTA (v7.3)	1.36e-19	9.3e-17	2.64e-17	1.88e-16	14	46	CENPE,CENPU,PRC1,CCNB1,KIF20A,AURKA,FBXO5,NDC80,BUB1,BUB1B,TPX2,CDK1,CDC20,CDC25C
Pathway	1269820	Mitotic Prometaphase		BioSystems: REACTOME	1.54e-19	1.06e-16	2.64e-17	1.88e-16	18	111	KIF18A,CENPE,CENPF,SPC25,CENPU,BIRC5,NCAPH,CCNB1,NCAPG,NDC80,CCNB2,BUB1,BUB1B,CDK1,CDC20,MAD2L1,AURKB,KIF2C
Pathway	138007	PLK1 signaling events		BioSystems: Pathway Interaction Database	4.51e-18	3.09e-15	6.19e-16	4.4e-15	13	44	CENPE,CENPU,CCNB1,KIF20A,AURKA,FBXO5,NDC80,BUB1,BUB1B,TPX2,CDK1,CDC20,CDC25C
Pathway	1269821	Resolution of Sister Chromatid Cohesion		BioSystems: REACTOME	3.79e-17	2.6e-14	4.33e-15	3.08e-14	16	103	KIF18A,CENPE,CENPF,SPC25,CENPU,BIRC5,CCNB1,NDC80,CCNB2,BUB1,BUB1B,CDK1,CDC20,MAD2L1,AURKB,KIF2C
Pathway	1269810	M Phase		BioSystems: REACTOME	6.36e-17	4.36e-14	6.23e-15	4.43e-14	23	311	KIF18A,KIF23,CENPE,CENPF,UBE2C,SPC25,CENPU,BIRC5,NCAPH,CCNB1,KIF20A,NCAPG,FBXO5,LMNB1,NDC80,CCNB2,BUB1,BUB1B,CDK1,CDC20,MAD2L1,AURKB,KIF2C
Pathway	1269742	Cell Cycle Checkpoints		BioSystems: REACTOME	1.01e-14	6.93e-12	8.66e-13	6.16e-12	18	204	BRIP1,UBE2C,MCM2,CHEK1,MCM10,CCNA2,CCNB1,CCNB2,CCNE2,BUB1B,EXO1,CDK1,CDC6,CDC20,CDC25A,CDC25C,DNA2,MAD2L1
Pathway	83054	Cell cycle		BioSystems: KEGG	1.84e-14	1.26e-11	1.4e-12	9.94e-12	15	124	MCM2,CHEK1,TTK,CCNA2,CCNB1,CCNB2,CCNE2,BUB1,BUB1B,CDK1,CDC6,CDC20,CDC25A,CDC25C,MAD2L1
Pathway	M7963	Cell cycle		MSigDB C2 BIOCARTA (v7.3)	2.07e-14	1.42e-11	1.42e-12	1.01e-11	15	125	MCM2,CHEK1,TTK,CCNA2,CCNB1,CCNB2,CCNE2,BUB1,BUB1B,CDK1,CDC6,CDC20,CDC25A,CDC25C,MAD2L1
Pathway	M39678	Retinoblastoma Gene in Cancer		MSigDB C2 BIOCARTA (v7.3)	7.98e-14	5.47e-11	4.97e-12	3.54e-11	13	88	POLE2,KIF4A,CHEK1,RRM2,TTK,CCNA2,CCNB1,CCNB2,CCNE2,CDK1,CDC25A,PLK4,TOP2A
Pathway	138080	Aurora B signaling		BioSystems: Pathway Interaction Database	1.87e-13	1.28e-10	9.86e-12	7.01e-11	10	39	KIF23,BIRC5,NCAPH,KIF20A,AURKA,NCAPG,NDC80,BUB1,AURKB,KIF2C
Pathway	M14	Aurora B signaling		MSigDB C2 BIOCARTA (v7.3)	1.87e-13	1.28e-10	9.86e-12	7.01e-11	10	39	KIF23,BIRC5,NCAPH,KIF20A,AURKA,NCAPG,NDC80,BUB1,AURKB,KIF2C
Pathway	1269823	Mitotic Metaphase and Anaphase		BioSystems: REACTOME	3.69e-13	2.53e-10	1.81e-11	1.28e-10	16	182	KIF18A,CENPE,CENPF,UBE2C,SPC25,CENPU,BIRC5,FBXO5,LMNB1,NDC80,BUB1,BUB1B,CDC20,MAD2L1,AURKB,KIF2C
Pathway	1269519	RHO GTPases Activate Formins		BioSystems: REACTOME	3.44e-12	2.36e-09	1.58e-10	1.12e-09	13	117	KIF18A,CENPE,CENPF,SPC25,CENPU,BIRC5,NDC80,BUB1,BUB1B,CDC20,MAD2L1,AURKB,KIF2C
Pathway	1269825	Mitotic Anaphase		BioSystems: REACTOME	5.03e-12	3.45e-09	2.16e-10	1.53e-09	15	181	KIF18A,CENPE,CENPF,UBE2C,SPC25,CENPU,BIRC5,LMNB1,NDC80,BUB1,BUB1B,CDC20,MAD2L1,AURKB,KIF2C
Pathway	M39650	Cell Cycle		MSigDB C2 BIOCARTA (v7.3)	5.93e-12	4.07e-09	2.39e-10	1.7e-09	13	122	MCM2,CHEK1,TTK,CCNA2,CCNB1,CCNB2,CCNE2,BUB1,CDK1,CDC6,CDC20,CDC25A,CDC25C
Pathway	M176	FOXM1 transcription factor network		MSigDB C2 BIOCARTA (v7.3)	1.16e-11	7.97e-09	4.43e-10	3.15e-09	9	40	FOXM1,CENPF,BIRC5,CCNA2,CCNB1,NEK2,CCNB2,CDK1,AURKB
Pathway	1269378	Kinesins		BioSystems: REACTOME	2.35e-11	1.61e-08	8.5e-10	6.04e-09	9	43	KIF18A,KIF23,CENPE,KIF4A,KIF20A,KIF15,KIF18B,KIF11,KIF2C
Pathway	1269826	Separation of Sister Chromatids		BioSystems: REACTOME	2.97e-11	2.03e-08	1.02e-09	7.23e-09	14	170	KIF18A,CENPE,CENPF,UBE2C,SPC25,CENPU,BIRC5,NDC80,BUB1,BUB1B,CDC20,MAD2L1,AURKB,KIF2C
Pathway	1269837	Regulation of mitotic cell cycle		BioSystems: REACTOME	5.37e-11	3.68e-08	1.67e-09	1.19e-08	11	89	UBE2C,CCNA2,CCNB1,AURKA,NEK2,FBXO5,BUB1B,CDK1,CDC20,MAD2L1,AURKB
Pathway	1269838	APC/C-mediated degradation of cell cycle proteins		BioSystems: REACTOME	5.37e-11	3.68e-08	1.67e-09	1.19e-08	11	89	UBE2C,CCNA2,CCNB1,AURKA,NEK2,FBXO5,BUB1B,CDK1,CDC20,MAD2L1,AURKB
Pathway	1269800	Cyclin A/B1 associated events during G2/M transition		BioSystems: REACTOME	1.66e-10	1.14e-07	4.96e-09	3.53e-08	7	22	FOXM1,CCNA2,CCNB1,CCNB2,CDK1,CDC25A,CDC25C
Pathway	137935	FOXM1 transcription factor network		BioSystems: Pathway Interaction Database	2.41e-10	1.65e-07	6.88e-09	4.89e-08	8	37	FOXM1,CENPF,BIRC5,CCNB1,NEK2,CCNB2,CDK1,AURKB
Pathway	1269509	RHO GTPase Effectors		BioSystems: REACTOME	5.52e-10	3.79e-07	1.51e-08	1.08e-07	16	295	KIF18A,CENPE,CENPF,SPC25,CENPU,BIRC5,PRC1,NDC80,BUB1,BUB1B,KIF14,CDC20,CDC25C,MAD2L1,AURKB,KIF2C
Pathway	1269764	Mitotic G1-G1/S phases		BioSystems: REACTOME	7.93e-10	5.44e-07	2.09e-08	1.49e-07	12	145	POLE2,MCM2,MCM10,RRM2,CCNA2,CCNB1,FBXO5,CCNE2,CDK1,CDC6,CDC25A,TOP2A
Pathway	1269799	G2/M Transition	1	BioSystems: REACTOME	1.07e-09	7.3e-07	2.71e-08	1.92e-07	13	184	FOXM1,CENPF,HMMR,CCNA2,CCNB1,AURKA,NEK2,CCNB2,TPX2,CDK1,CDC25A,CDC25C,PLK4
Pathway	1269797	Mitotic G2-G2/M phases		BioSystems: REACTOME	1.22e-09	8.34e-07	2.98e-08	2.12e-07	13	186	FOXM1,CENPF,HMMR,CCNA2,CCNB1,AURKA,NEK2,CCNB2,TPX2,CDK1,CDC25A,CDC25C,PLK4
Pathway	1269768	G1/S Transition	1	BioSystems: REACTOME	1.54e-09	1.06e-06	3.65e-08	2.59e-07	11	121	POLE2,MCM2,MCM10,RRM2,CCNA2,CCNB1,FBXO5,CCNE2,CDK1,CDC6,CDC25A
Pathway	1269804	Polo-like kinase mediated events		BioSystems: REACTOME	1.76e-09	1.2e-06	4.02e-08	2.85e-07	6	17	FOXM1,CENPF,CCNB1,CCNB2,CDC25A,CDC25C
Pathway	1269753	G2/M Checkpoints		BioSystems: REACTOME	5.62e-09	3.86e-06	1.24e-07	8.84e-07	12	172	BRIP1,MCM2,CHEK1,MCM10,CCNB1,CCNB2,EXO1,CDK1,CDC6,CDC25A,CDC25C,DNA2
Pathway	1269822	Condensation of Prometaphase Chromosomes		BioSystems: REACTOME	9.49e-09	6.51e-06	2.04e-07	1.45e-06	5	11	NCAPH,CCNB1,NCAPG,CCNB2,CDK1
Pathway	1383042	COPI-dependent Golgi-to-ER retrograde traffic		BioSystems: REACTOME	1.07e-08	7.35e-06	2.23e-07	1.58e-06	9	83	KIF18A,KIF23,CENPE,KIF4A,KIF20A,KIF15,KIF18B,KIF11,KIF2C
Pathway	M16817	Oocyte meiosis		MSigDB C2 BIOCARTA (v7.3)	1.16e-08	7.93e-06	2.33e-07	1.66e-06	10	113	CCNB1,AURKA,FBXO5,CCNB2,CCNE2,BUB1,CDK1,CDC20,CDC25C,MAD2L1
Pathway	1269802	Cyclin B2 mediated events		BioSystems: REACTOME	1.47e-08	1.01e-05	2.88e-07	2.05e-06	4	5	CCNB2,CDK1,CDC25A,CDC25C
Pathway	1269507	Signaling by Rho GTPases		BioSystems: REACTOME	1.82e-08	1.25e-05	3.47e-07	2.46e-06	17	430	KIF18A,CENPE,CENPF,SPC25,CENPU,BIRC5,PRC1,ARHGAP11A,NDC80,BUB1,BUB1B,KIF14,CDC20,CDC25C,MAD2L1,AURKB,KIF2C
Pathway	1269765	G0 and Early G1		BioSystems: REACTOME	2.39e-08	1.64e-05	4.44e-07	3.16e-06	6	25	CCNA2,CCNE2,CDK1,CDC6,CDC25A,TOP2A
Pathway	126909	Oocyte meiosis		BioSystems: KEGG	2.84e-08	1.95e-05	5.13e-07	3.64e-06	10	124	CCNB1,AURKA,FBXO5,CCNB2,CCNE2,BUB1,CDK1,CDC20,CDC25C,MAD2L1
Pathway	1383080	Regulation of TP53 Activity through Phosphorylation		BioSystems: REACTOME	2.95e-08	2.02e-05	5.19e-07	3.69e-06	9	93	BRIP1,CHEK1,CCNA2,AURKA,CDK5R1,TPX2,EXO1,DNA2,AURKB
Pathway	1269840	Phosphorylation of Emi1		BioSystems: REACTOME	4.39e-08	3.01e-05	7.53e-07	5.35e-06	4	6	CCNB1,FBXO5,CDK1,CDC20
Pathway	M39347	Gastric Cancer Network 1		MSigDB C2 BIOCARTA (v7.3)	6.27e-08	4.3e-05	1.05e-06	7.45e-06	6	29	CENPF,UBE2C,AURKA,KIF15,TPX2,TOP2A
Pathway	M39772	Regulation of sister chromatid separation at the metaphase-anaphase transition		MSigDB C2 BIOCARTA (v7.3)	8.71e-08	5.98e-05	1.42e-06	1.01e-05	5	16	CENPE,BUB1,BUB1B,CDC20,MAD2L1
Pathway	1269654	Transcriptional Regulation by TP53		BioSystems: REACTOME	1.14e-07	7.8e-05	1.77e-06	1.26e-05	15	374	BRIP1,BIRC5,CHEK1,CCNA2,CCNB1,AURKA,CDK5R1,CCNE2,FANCI,TPX2,EXO1,CDK1,CDC25C,DNA2,AURKB
Pathway	1269844	APC/C:Cdc20 mediated degradation of mitotic proteins		BioSystems: REACTOME	1.14e-07	7.8e-05	1.77e-06	1.26e-05	8	78	UBE2C,CCNA2,CCNB1,NEK2,BUB1B,CDK1,CDC20,MAD2L1
Pathway	1269842	Activation of APC/C and APC/C:Cdc20 mediated degradation of mitotic proteins		BioSystems: REACTOME	1.26e-07	8.62e-05	1.92e-06	1.36e-05	8	79	UBE2C,CCNA2,CCNB1,NEK2,BUB1B,CDK1,CDC20,MAD2L1
Pathway	1383041	Golgi-to-ER retrograde transport		BioSystems: REACTOME	1.39e-07	9.51e-05	2.07e-06	1.47e-05	9	111	KIF18A,KIF23,CENPE,KIF4A,KIF20A,KIF15,KIF18B,KIF11,KIF2C
Pathway	M39490	DNA IR-damage and cellular response via ATR		MSigDB C2 BIOCARTA (v7.3)	1.53e-07	0.000105	2.23e-06	1.59e-05	8	81	FOXM1,BRIP1,MCM2,CHEK1,FANCI,EXO1,CDK1,CDC25C
Pathway	1269772	G1/S-Specific Transcription		BioSystems: REACTOME	1.69e-07	0.000116	2.41e-06	1.71e-05	5	18	RRM2,FBXO5,CDK1,CDC6,CDC25A
Pathway	1269774	E2F mediated regulation of DNA replication		BioSystems: REACTOME	1.72e-07	0.000118	2.41e-06	1.71e-05	6	34	RRM2,CCNB1,FBXO5,CDK1,CDC6,CDC25A
Pathway	1269839	Regulation of APC/C activators between G1/S and early anaphase		BioSystems: REACTOME	1.85e-07	0.000127	2.54e-06	1.81e-05	8	83	UBE2C,CCNA2,CCNB1,FBXO5,BUB1B,CDK1,CDC20,MAD2L1
Pathway	M3578	Progesterone-mediated oocyte maturation		MSigDB C2 BIOCARTA (v7.3)	2.23e-07	0.000153	3.01e-06	2.14e-05	8	85	CCNA2,CCNB1,CCNB2,BUB1,CDK1,CDC25A,CDC25C,MAD2L1
Pathway	1269757	Activation of ATR in response to replication stress		BioSystems: REACTOME	2.92e-07	0.000201	3.86e-06	2.74e-05	6	37	MCM2,CHEK1,MCM10,CDC6,CDC25A,CDC25C
Pathway	1383076	Regulation of TP53 Activity		BioSystems: REACTOME	3.56e-07	0.000244	4.6e-06	3.27e-05	10	162	BRIP1,CHEK1,CCNA2,AURKA,CDK5R1,TPX2,EXO1,CDK1,DNA2,AURKB
Pathway	M22031	cdc25 and chk1 Regulatory Pathway in response to DNA damage		MSigDB C2 BIOCARTA (v7.3)	3.62e-07	0.000249	4.6e-06	3.27e-05	4	9	CHEK1,CDK1,CDC25A,CDC25C
Pathway	M46	ATR signaling pathway		MSigDB C2 BIOCARTA (v7.3)	4.05e-07	0.000278	5.05e-06	3.59e-05	6	39	MCM2,CHEK1,CCNA2,CDC6,CDC25A,CDC25C
Pathway	119304	Progesterone-mediated oocyte maturation		BioSystems: KEGG	5.75e-07	0.000395	7.05e-06	5.01e-05	8	96	CCNA2,CCNB1,CCNB2,BUB1,CDK1,CDC25A,CDC25C,MAD2L1
Pathway	1269777	S Phase		BioSystems: REACTOME	6.12e-07	0.00042	7.36e-06	5.23e-05	9	132	POLE2,MCM2,GINS1,CCNA2,CCNE2,GINS2,CDC6,CDC25A,DNA2
Pathway	M39339	DNA Damage Response		MSigDB C2 BIOCARTA (v7.3)	7.89e-07	0.000541	9.34e-06	6.64e-05	7	69	CHEK1,CCNB1,CCNB2,CCNE2,CDK1,CDC25A,CDC25C
Pathway	M8560	Cell Cycle: G2/M Checkpoint		MSigDB C2 BIOCARTA (v7.3)	8.08e-07	0.000555	9.4e-06	6.68e-05	5	24	CHEK1,CCNB1,CDK1,CDC25A,CDC25C
Pathway	M10994	Activation of Src by Protein-tyrosine phosphatase alpha		MSigDB C2 BIOCARTA (v7.3)	9.38e-07	0.000644	1.06e-05	7.5e-05	4	11	CCNB1,CDK1,CDC25A,CDC25C
Pathway	M13022	Sonic Hedgehog (SHH) Receptor Ptc1 Regulates cell cycle		MSigDB C2 BIOCARTA (v7.3)	9.38e-07	0.000644	1.06e-05	7.5e-05	4	11	CCNB1,CDK1,CDC25A,CDC25C
Pathway	1269200	MHC class II antigen presentation		BioSystems: REACTOME	9.88e-07	0.000678	1.09e-05	7.77e-05	8	103	KIF18A,KIF23,CENPE,KIF4A,KIF20A,KIF15,KIF11,KIF2C
Pathway	1269847	APC-Cdc20 mediated degradation of Nek2A		BioSystems: REACTOME	1.01e-06	0.000689	1.09e-05	7.78e-05	5	25	UBE2C,NEK2,BUB1B,CDC20,MAD2L1
Pathway	M40048	Development of ureteric collection system		MSigDB C2 BIOCARTA (v7.3)	1.27e-06	0.000872	1.36e-05	9.68e-05	6	47	MYCN,ITGA8,HOXA11,SALL1,HOXD11,SIX2
Pathway	1269755	Chk1/Chk2(Cds1) mediated inactivation of Cyclin B:Cdk1 complex		BioSystems: REACTOME	1.4e-06	0.00096	1.48e-05	0.000105	4	12	CHEK1,CCNB1,CDK1,CDC25C
Pathway	1269845	APC:Cdc20 mediated degradation of cell cycle proteins prior to satisfation of the cell cycle checkpoint		BioSystems: REACTOME	1.53e-06	0.00105	1.59e-05	0.000113	7	76	UBE2C,CCNA2,NEK2,BUB1B,CDK1,CDC20,MAD2L1
Pathway	PW:0000384	G2/M DNA damage checkpoint		Pathway Ontology	1.62e-06	0.00111	1.65e-05	0.000117	3	4	CHEK1,CCNB1,CDK1
Pathway	1383071	TP53 Regulates Transcription of Cell Cycle Genes		BioSystems: REACTOME	1.64e-06	0.00112	1.65e-05	0.000117	6	49	CCNA2,CCNB1,AURKA,CCNE2,CDK1,CDC25C
Pathway	1269875	DNA Replication		BioSystems: REACTOME	1.75e-06	0.0012	1.74e-05	0.000124	8	111	POLE2,MCM2,MCM10,GINS1,CCNA2,GINS2,CDC6,DNA2
Pathway	M18159	RB Tumor Suppressor/Checkpoint Signaling in response to DNA damage		MSigDB C2 BIOCARTA (v7.3)	2.01e-06	0.00138	1.97e-05	0.00014	4	13	CHEK1,CDK1,CDC25A,CDC25C
Pathway	1269377	Factors involved in megakaryocyte development and platelet production		BioSystems: REACTOME	2.61e-06	0.00179	2.52e-05	0.00018	9	157	KIF18A,KIF23,CENPE,KIF4A,KIF20A,KIF15,KIF18B,KIF11,KIF2C
Pathway	137925	Aurora A signaling		BioSystems: Pathway Interaction Database	3.1e-06	0.00213	2.91e-05	0.000207	5	31	DLGAP5,BIRC5,AURKA,TPX2,AURKB
Pathway	M242	Aurora A signaling		MSigDB C2 BIOCARTA (v7.3)	3.1e-06	0.00213	2.91e-05	0.000207	5	31	DLGAP5,BIRC5,AURKA,TPX2,AURKB
Pathway	1269756	G2/M DNA replication checkpoint		BioSystems: REACTOME	4.03e-06	0.00276	3.74e-05	0.000266	3	5	CCNB1,CCNB2,CDK1
Pathway	M39524	miRNA Regulation of DNA Damage Response		MSigDB C2 BIOCARTA (v7.3)	5.99e-06	0.00411	5.48e-05	0.000389	7	93	CHEK1,CCNB1,CCNB2,CCNE2,CDK1,CDC25A,CDC25C
Pathway	1269754	G2/M DNA damage checkpoint		BioSystems: REACTOME	7.39e-06	0.00507	6.67e-05	0.000475	7	96	BRIP1,CHEK1,CCNB1,EXO1,CDK1,CDC25C,DNA2
Pathway	1383038	Intra-Golgi and retrograde Golgi-to-ER traffic		BioSystems: REACTOME	8e-06	0.00549	7.04e-05	0.000501	9	180	KIF18A,KIF23,CENPE,KIF4A,KIF20A,KIF15,KIF18B,KIF11,KIF2C
Pathway	M39627	G1 to S cell cycle control		MSigDB C2 BIOCARTA (v7.3)	8.01e-06	0.00549	7.04e-05	0.000501	6	64	POLE2,MCM2,CCNB1,CCNE2,CDK1,CDC25A
Pathway	1383073	TP53 Regulates Transcription of Genes Involved in G2 Cell Cycle Arrest		BioSystems: REACTOME	1.05e-05	0.00722	9.14e-05	0.00065	4	19	CCNB1,AURKA,CDK1,CDC25C
Pathway	M39433	ATM Signaling Pathway		MSigDB C2 BIOCARTA (v7.3)	1.14e-05	0.00781	9.66e-05	0.000687	5	40	CHEK1,CCNB1,CDK1,CDC25A,CDC25C
Pathway	M6370	p53 signaling pathway		MSigDB C2 BIOCARTA (v7.3)	1.14e-05	0.00783	9.66e-05	0.000687	6	68	CHEK1,RRM2,CCNB1,CCNB2,CCNE2,CDK1
Pathway	1269779	Synthesis of DNA		BioSystems: REACTOME	1.18e-05	0.00808	9.85e-05	0.0007	7	103	POLE2,MCM2,GINS1,CCNA2,GINS2,CDC6,DNA2
Pathway	83055	p53 signaling pathway		BioSystems: KEGG	1.24e-05	0.00852	0.000103	0.00073	6	69	CHEK1,RRM2,CCNB1,CCNB2,CCNE2,CDK1
Pathway	1269761	Inhibition of the proteolytic activity of APC/C required for the onset of anaphase by mitotic spindle checkpoint components		BioSystems: REACTOME	1.31e-05	0.00897	0.000106	0.00075	4	20	UBE2C,BUB1B,CDC20,MAD2L1
Pathway	1269762	Inactivation of APC/C via direct inhibition of the APC/C complex		BioSystems: REACTOME	1.31e-05	0.00897	0.000106	0.00075	4	20	UBE2C,BUB1B,CDC20,MAD2L1
Pathway	1269816	Activation of NIMA Kinases NEK9, NEK6, NEK7		BioSystems: REACTOME	1.4e-05	0.00957	0.000111	0.000791	3	7	CCNB1,CCNB2,CDK1
Pathway	1269758	Mitotic Spindle Checkpoint		BioSystems: REACTOME	1.61e-05	0.011	0.000127	0.0009	4	21	UBE2C,BUB1B,CDC20,MAD2L1
Pathway	M40	E2F transcription factor network		MSigDB C2 BIOCARTA (v7.3)	1.72e-05	0.0118	0.000133	0.000943	6	73	RRM2,CCNA2,CCNE2,CDK1,CDC6,CDC25A
Pathway	137934	E2F transcription factor network		BioSystems: Pathway Interaction Database	1.72e-05	0.0118	0.000133	0.000943	6	73	RRM2,CCNA2,CCNE2,CDK1,CDC6,CDC25A
Pathway	1269846	Cdc20:Phospho-APC/C mediated degradation of Cyclin A		BioSystems: REACTOME	2.01e-05	0.0138	0.000152	0.00108	6	75	UBE2C,CCNA2,BUB1B,CDK1,CDC20,MAD2L1
Pathway	1383018	AURKA Activation by TPX2		BioSystems: REACTOME	2.01e-05	0.0138	0.000152	0.00108	6	75	HMMR,AURKA,NEK2,TPX2,CDK1,PLK4
Pathway	M10154	Cdc25 activates the cdc2/cyclin B complex to induce the G2/M transition.		MSigDB C2 BIOCARTA (v7.3)	2.22e-05	0.0152	0.000166	0.00118	3	8	CHEK1,CDK1,CDC25A
Pathway	M39518	ATM Signaling Network in Development and Disease		MSigDB C2 BIOCARTA (v7.3)	2.29e-05	0.0157	0.000168	0.00119	5	46	CHEK1,CDK5R1,BUB1,CDK1,AURKB
Pathway	1457789	Deregulated CDK5 triggers multiple neurodegenerative pathways in Alzheimer's disease models		BioSystems: REACTOME	2.35e-05	0.0161	0.000168	0.00119	4	23	CDK5R1,LMNB1,CDC25A,CDC25C
Pathway	1457788	Neurodegenerative Diseases		BioSystems: REACTOME	2.35e-05	0.0161	0.000168	0.00119	4	23	CDK5R1,LMNB1,CDC25A,CDC25C
Pathway	1269848	APC/C:Cdc20 mediated degradation of Cyclin B		BioSystems: REACTOME	2.35e-05	0.0161	0.000168	0.00119	4	23	UBE2C,CCNB1,CDK1,CDC20
Pathway	M19	p73 transcription factor network		MSigDB C2 BIOCARTA (v7.3)	2.71e-05	0.0186	0.000192	0.00136	6	79	CHEK1,CCNA2,CCNB1,CCNE2,BUB1,CDK1
Pathway	M17370	Role of Ran in mitotic spindle regulation		MSigDB C2 BIOCARTA (v7.3)	4.7e-05	0.0323	0.000326	0.00232	3	10	AURKA,KIF15,TPX2
Pathway	1269776	E2F-enabled inhibition of pre-replication complex formation		BioSystems: REACTOME	4.7e-05	0.0323	0.000326	0.00232	3	10	CCNB1,CDK1,CDC25A
Pathway	PW:0000096	G2/M checkpoint		Pathway Ontology	5.59e-05	0.0384	0.000376	0.00267	2	2	CCNB1,CDK1
Pathway	PW:0000091	G2/M transition		Pathway Ontology	5.59e-05	0.0384	0.000376	0.00267	2	2	CCNB1,CDK1
Pathway	PW:0000385	G2/M DNA replication checkpoint		Pathway Ontology	5.59e-05	0.0384	0.000376	0.00267	2	2	CCNB1,CDK1
Pathway	1269803	Regulation of PLK1 Activity at G2/M Transition		BioSystems: REACTOME	5.68e-05	0.039	0.000379	0.00269	6	90	CCNB1,AURKA,NEK2,CCNB2,CDK1,PLK4
Pathway	1269785	Unwinding of DNA		BioSystems: REACTOME	8.53e-05	0.0585	0.000563	0.004	3	12	MCM2,GINS1,GINS2
Pathway	1269784	DNA strand elongation		BioSystems: REACTOME	9.06e-05	0.0621	0.000586	0.00417	4	32	MCM2,GINS1,GINS2,DNA2
Pathway	1269773	Activation of the pre-replicative complex		BioSystems: REACTOME	9.06e-05	0.0621	0.000586	0.00417	4	32	POLE2,MCM2,MCM10,CDC6
Pathway	1270350	DNA Repair		BioSystems: REACTOME	0.000136	0.0934	0.000873	0.00621	10	319	BRIP1,PCLAF,POLE2,DTL,CHEK1,EYA1,CCNA2,FANCI,EXO1,DNA2
Pathway	1269812	Golgi Cisternae Pericentriolar Stack Reorganization		BioSystems: REACTOME	0.00014	0.0958	0.000887	0.0063	3	14	CCNB1,CCNB2,CDK1
Pathway	1309102	HDR through Homologous Recombination (HRR)		BioSystems: REACTOME	0.000164	0.112	0.00102	0.00721	5	69	BRIP1,POLE2,CHEK1,EXO1,DNA2
Pathway	PW:0000088	G1/S transition		Pathway Ontology	0.000166	0.114	0.00102	0.00721	2	3	CCNB1,CDK1
Pathway	1269801	Phosphorylation of proteins involved in the G2/M transition by Cyclin A:Cdc2 complexes		BioSystems: REACTOME	0.000166	0.114	0.00102	0.00721	2	3	CCNA2,CDK1
Pathway	138033	Signaling by Aurora kinases		BioSystems: Pathway Interaction Database	0.000166	0.114	0.00102	0.00721	2	3	AURKA,AURKB
Pathway	1269819	Depolymerisation of the Nuclear Lamina		BioSystems: REACTOME	0.000174	0.119	0.00105	0.00749	3	15	CCNB1,LMNB1,CDK1
Pathway	M22011	Estrogen-responsive protein Efp controls cell cycle and breast tumors growth		MSigDB C2 BIOCARTA (v7.3)	0.000213	0.146	0.00128	0.00909	3	16	CCNB1,CCNB2,CDK1
Pathway	1309104	Presynaptic phase of homologous DNA pairing and strand exchange		BioSystems: REACTOME	0.00022	0.151	0.00131	0.00933	4	40	BRIP1,CHEK1,EXO1,DNA2
Pathway	M39335	DNA Replication		MSigDB C2 BIOCARTA (v7.3)	0.000266	0.183	0.00158	0.0112	4	42	POLE2,MCM2,MCM10,CDC6
Pathway	1309095	DNA Double-Strand Break Repair		BioSystems: REACTOME	0.000274	0.188	0.00161	0.0114	7	169	BRIP1,POLE2,CHEK1,EYA1,CCNA2,EXO1,DNA2
Pathway	M40049	DNA Repair Pathways Full Network		MSigDB C2 BIOCARTA (v7.3)	0.000291	0.2	0.00167	0.0119	6	121	BRIP1,POLE2,CHEK1,FANCI,EXO1,NEIL3
Pathway	1309103	Homologous DNA Pairing and Strand Exchange		BioSystems: REACTOME	0.000292	0.2	0.00167	0.0119	4	43	BRIP1,CHEK1,EXO1,DNA2
Pathway	M39891	Genes controlling nephrogenesis		MSigDB C2 BIOCARTA (v7.3)	0.000292	0.2	0.00167	0.0119	4	43	ITGA8,EYA1,HOXA11,HOXD11
Pathway	1269843	Phosphorylation of the APC/C		BioSystems: REACTOME	0.000362	0.248	0.00205	0.0146	3	19	UBE2C,CCNB1,CDK1
Pathway	1339113	SUMOylation of DNA replication proteins		BioSystems: REACTOME	0.000379	0.26	0.00213	0.0152	4	46	BIRC5,AURKA,TOP2A,AURKB
Pathway	M13883	How Progesterone Initiates the Oocyte Maturation		MSigDB C2 BIOCARTA (v7.3)	0.000491	0.337	0.00274	0.0195	3	21	CCNB1,CDK1,CDC25C
Pathway	1309100	HDR through Homologous Recombination (HR) or Single Strand Annealing (SSA)		BioSystems: REACTOME	0.000503	0.345	0.00278	0.0198	6	134	BRIP1,POLE2,CHEK1,CCNA2,EXO1,DNA2
Pathway	1269815	Nuclear Envelope Breakdown		BioSystems: REACTOME	0.000608	0.417	0.00334	0.0237	4	52	CCNB1,LMNB1,CCNB2,CDK1
Pathway	1309099	Homology Directed Repair		BioSystems: REACTOME	0.000634	0.435	0.00345	0.0245	6	140	BRIP1,POLE2,CHEK1,CCNA2,EXO1,DNA2
Pathway	M17770	Cyclins and Cell Cycle Regulation		MSigDB C2 BIOCARTA (v7.3)	0.000647	0.444	0.00347	0.0246	3	23	CCNB1,CDK1,CDC25A
Pathway	M39814	GDNF/RET signalling axis		MSigDB C2 BIOCARTA (v7.3)	0.000647	0.444	0.00347	0.0246	3	23	SOX11,EYA1,SALL1
Pathway	1269650	Generic Transcription Pathway		BioSystems: REACTOME	0.000791	0.543	0.00421	0.0299	16	879	BRIP1,BIRC5,CITED1,CHEK1,CCNA2,CCNB1,AURKA,CDK5R1,CCNE2,FANCI,TPX2,EXO1,CDK1,CDC25C,DNA2,AURKB
Pathway	1309101	Processing of DNA double-strand break ends		BioSystems: REACTOME	0.000873	0.599	0.00461	0.0328	5	99	BRIP1,CHEK1,CCNA2,EXO1,DNA2
Pathway	1309107	Resolution of D-loop Structures through Synthesis-Dependent Strand Annealing (SDSA)		BioSystems: REACTOME	0.00105	0.717	0.00547	0.0389	3	27	BRIP1,EXO1,DNA2
Pathway	1269853	Chromosome Maintenance		BioSystems: REACTOME	0.0014	0.961	0.00728	0.0517	5	110	POLE2,HJURP,CENPU,OIP5,DNA2
Pathway	M22021	Regulation of cell cycle progression by Plk3		MSigDB C2 BIOCARTA (v7.3)	0.00151	1	0.00778	0.0553	2	8	CHEK1,CDC25C
Pathway	1269743	G1/S DNA Damage Checkpoints		BioSystems: REACTOME	0.00176	1	0.00902	0.0641	4	69	CHEK1,CCNA2,CCNE2,CDC25A
Pathway	M39497	Gastric Cancer Network 2		MSigDB C2 BIOCARTA (v7.3)	0.00189	1	0.00959	0.0682	3	33	UBE2C,FANCI,TOP2A
Pathway	1268790	Highly calcium permeable nicotinic acetylcholine receptors		BioSystems: REACTOME	0.00193	1	0.00974	0.0692	2	9	CHRNA1,CHRNA5
Pathway	1269817	Nuclear Pore Complex (NPC) Disassembly		BioSystems: REACTOME	0.00224	1	0.0111	0.0792	3	35	CCNB1,CCNB2,CDK1
Pathway	1309106	Resolution of D-loop Structures through Holliday Junction Intermediates		BioSystems: REACTOME	0.00224	1	0.0111	0.0792	3	35	BRIP1,EXO1,DNA2
Pathway	1269851	APC/C:Cdh1 mediated degradation of Cdc20 and other APC/C:Cdh1 targeted proteins in late mitosis/early G1		BioSystems: REACTOME	0.00239	1	0.0117	0.0829	4	75	UBE2C,AURKA,CDC20,AURKB
Pathway	1269814	MASTL Facilitates Mitotic Progression		BioSystems: REACTOME	0.0024	1	0.0117	0.0829	2	10	CCNB1,CDK1
Pathway	83039	DNA replication		BioSystems: KEGG	0.00243	1	0.0117	0.0829	3	36	POLE2,MCM2,DNA2
Pathway	1309105	Resolution of D-Loop Structures		BioSystems: REACTOME	0.00243	1	0.0117	0.0829	3	36	BRIP1,EXO1,DNA2
Pathway	M16853	DNA replication		MSigDB C2 BIOCARTA (v7.3)	0.00243	1	0.0117	0.0829	3	36	POLE2,MCM2,DNA2
Pathway	1269796	Removal of licensing factors from origins		BioSystems: REACTOME	0.00251	1	0.012	0.0851	4	76	MCM2,MCM10,CCNA2,CDC6
Pathway	1309108	HDR through Single Strand Annealing (SSA)		BioSystems: REACTOME	0.00284	1	0.0134	0.095	3	38	BRIP1,EXO1,DNA2
Pathway	P00059	p53 pathway		PantherDB	0.00289	1	0.0134	0.095	4	79	RRM2,CCNB1,CDK1,CDC25C
Pathway	M66	Validated targets of C-MYC transcriptional activation		MSigDB C2 BIOCARTA (v7.3)	0.00289	1	0.0134	0.095	4	79	PEG10,BIRC5,CCNB1,CDC25A
Pathway	1269794	Regulation of DNA replication		BioSystems: REACTOME	0.00289	1	0.0134	0.095	4	79	MCM2,MCM10,CCNA2,CDC6
Pathway	1269807	Recruitment of NuMA to mitotic centrosomes		BioSystems: REACTOME	0.00292	1	0.0134	0.095	2	11	CCNB1,CDK1
Pathway	M5731	AKAP95 role in mitosis and chromosome dynamics		MSigDB C2 BIOCARTA (v7.3)	0.00292	1	0.0134	0.095	2	11	CCNB1,CDK1
Pathway	1270429	DNA Damage/Telomere Stress Induced Senescence		BioSystems: REACTOME	0.00303	1	0.0138	0.0978	4	80	CCNA2,HMGA2,LMNB1,CCNE2
Pathway	373901	HTLV-I infection		BioSystems: KEGG	0.00309	1	0.0139	0.0991	7	256	POLE2,CHEK1,CCNB2,BUB1B,FZD10,CDC20,MAD2L1
Pathway	169351	Validated targets of C-MYC transcriptional activation		BioSystems: Pathway Interaction Database	0.00317	1	0.0142	0.101	4	81	PEG10,BIRC5,CCNB1,CDC25A
Pathway	1269805	Centrosome maturation		BioSystems: REACTOME	0.00331	1	0.0147	0.104	4	82	CCNB1,NEK2,CDK1,PLK4
Pathway	1269806	Recruitment of mitotic centrosome proteins and complexes		BioSystems: REACTOME	0.00331	1	0.0147	0.104	4	82	CCNB1,NEK2,CDK1,PLK4
Pathway	1268789	Presynaptic nicotinic acetylcholine receptors		BioSystems: REACTOME	0.00349	1	0.0152	0.108	2	12	CHRNA1,CHRNA5
Pathway	1268793	Highly calcium permeable postsynaptic nicotinic acetylcholine receptors		BioSystems: REACTOME	0.00349	1	0.0152	0.108	2	12	CHRNA1,CHRNA5
Pathway	1270426	Cellular Senescence		BioSystems: REACTOME	0.00361	1	0.0157	0.112	6	197	UBE2C,EZH2,CCNA2,HMGA2,LMNB1,CCNE2
Pathway	1383072	TP53 Regulates Transcription of Genes Involved in G1 Cell Cycle Arrest		BioSystems: REACTOME	0.0041	1	0.0176	0.125	2	13	CCNA2,CCNE2
Pathway	M3686	Expression of cyclins regulates progression through the cell cycle by activating cyclin-dependent kinases.		MSigDB C2 BIOCARTA (v7.3)	0.0041	1	0.0176	0.125	2	13	CCNA2,CCNE2
Pathway	1269831	M/G1 Transition		BioSystems: REACTOME	0.00427	1	0.0181	0.128	4	88	POLE2,MCM2,MCM10,CDC6
Pathway	1269832	DNA Replication Pre-Initiation		BioSystems: REACTOME	0.00427	1	0.0181	0.128	4	88	POLE2,MCM2,MCM10,CDC6
Pathway	M39628	Integrated Cancer Pathway		MSigDB C2 BIOCARTA (v7.3)	0.0046	1	0.0194	0.138	3	45	CHEK1,CDK1,CDC25A
Pathway	M1	Fanconi anemia pathway		MSigDB C2 BIOCARTA (v7.3)	0.0052	1	0.0216	0.154	3	47	BRIP1,CHEK1,FANCI
Pathway	M236	Validated transcriptional targets of deltaNp63 isoforms		MSigDB C2 BIOCARTA (v7.3)	0.0052	1	0.0216	0.154	3	47	CCNB2,TOP2A,HELLS
Pathway	1268787	Acetylcholine Binding And Downstream Events		BioSystems: REACTOME	0.00547	1	0.0222	0.158	2	15	CHRNA1,CHRNA5
Pathway	1268788	Activation of Nicotinic Acetylcholine Receptors		BioSystems: REACTOME	0.00547	1	0.0222	0.158	2	15	CHRNA1,CHRNA5
Pathway	1269829	Mitotic Telophase/Cytokinesis		BioSystems: REACTOME	0.00547	1	0.0222	0.158	2	15	KIF23,KIF20A
Pathway	1268792	Postsynaptic nicotinic acetylcholine receptors		BioSystems: REACTOME	0.00547	1	0.0222	0.158	2	15	CHRNA1,CHRNA5
Pathway	M39566	Regulation of Microtubule Cytoskeleton		MSigDB C2 BIOCARTA (v7.3)	0.00585	1	0.0236	0.168	3	49	CDK1,AURKB,KIF2C
Pathway	1270367	DNA Damage Bypass		BioSystems: REACTOME	0.00619	1	0.0248	0.176	3	50	PCLAF,POLE2,DTL
Pathway	1270430	Formation of Senescence-Associated Heterochromatin Foci (SAHF)		BioSystems: REACTOME	0.00622	1	0.0248	0.176	2	16	HMGA2,LMNB1
Pathway	1269514	RHO GTPases activate CIT		BioSystems: REACTOME	0.00701	1	0.0277	0.197	2	17	PRC1,KIF14
Pathway	1269973	Hyaluronan metabolism		BioSystems: REACTOME	0.00701	1	0.0277	0.197	2	17	HMMR,HAS2
Pathway	PW:0000448	neuropeptide Y metabolic		Pathway Ontology	0.00754	1	0.0296	0.21	1	1	NPY
Pathway	1268743	SUMO E3 ligases SUMOylate target proteins		BioSystems: REACTOME	0.00768	1	0.03	0.213	4	104	BIRC5,AURKA,TOP2A,AURKB
Pathway	M6682	CDK Regulation of DNA Replication		MSigDB C2 BIOCARTA (v7.3)	0.00785	1	0.0304	0.216	2	18	MCM2,CDC6
Pathway	M39598	DNA IR-Double Strand Breaks (DSBs) and cellular response via ATM		MSigDB C2 BIOCARTA (v7.3)	0.00806	1	0.0311	0.221	3	55	CHEK1,EXO1,CDC25C
Pathway	1269850	Conversion from APC/C:Cdc20 to APC/C:Cdh1 in late anaphase		BioSystems: REACTOME	0.00873	1	0.0335	0.238	2	19	UBE2C,CDC20
Pathway	1268738	SUMOylation		BioSystems: REACTOME	0.00933	1	0.0355	0.253	4	110	BIRC5,AURKA,TOP2A,AURKB
Pathway	M16966	Stathmin and breast cancer resistance to antimicrotubule agents		MSigDB C2 BIOCARTA (v7.3)	0.00966	1	0.0366	0.26	2	20	CCNB1,CDK1
Pathway	1383017	The role of GTSE1 in G2/M progression after G2 checkpoint		BioSystems: REACTOME	0.0117	1	0.0441	0.313	3	63	CCNB1,CCNB2,CDK1
Pathway	M39668	DNA Mismatch Repair		MSigDB C2 BIOCARTA (v7.3)	0.0127	1	0.0475	0.338	2	23	POLE2,EXO1
Pubmed	28535371	Repression of Interstitial Identity in Nephron Progenitor Cells by Pax2 Establishes the Nephron-Interstitium Boundary during Kidney Development.	1	Pubmed	6.16e-39	1.18e-34	1.18e-34	1.23e-33	23	86	NUSAP1,KIF23,PCLAF,SPC25,PBK,ITGA8,CITED1,PRC1,RRM2,NCAPH,CCNA2,CCNB1,KIF20A,NCAPG,FBXO5,KIF15,TPX2,CDK1,SIX2,TOP2A,MAD2L1,KIF11,AURKB
Pubmed	26410627	The Interleukin-2-mTORc1 Kinase Axis Defines the Signaling, Differentiation, and Metabolism of T Helper 1 and Follicular B Helper T Cells.		Pubmed	4.2e-36	8.06e-32	4.03e-32	4.21e-31	27	213	NUSAP1,CDKN3,CENPE,UBE2C,DLGAP5,SPC25,BIRC5,DEPDC1,PRC1,NCAPH,CCNA2,CCNB1,CEP55,AURKA,NEK2,FBXO5,NDC80,CCNB2,BUB1,BUB1B,TPX2,ASPM,CDK1,CDC20,MAD2L1,KIF11,AURKB
Pubmed	20360068	Systematic analysis of human protein complexes identifies chromosome segregation proteins.		Pubmed	7.41e-29	1.42e-24	4.74e-25	4.95e-24	38	1147	NUSAP1,KIF23,CENPE,CENPF,UBE2C,DTL,HJURP,SPC25,CENPU,KIF4A,BIRC5,CHEK1,HMMR,PRC1,TTK,CCNA2,CCNB1,CEP55,KIF20A,AURKA,NEK2,FBXO5,LMNB1,NDC80,CCNB2,BUB1,BUB1B,TPX2,ASPM,KIF14,CDK1,CDC6,CDC20,CDC25C,PLK4,TOP2A,MAD2L1,AURKB
Pubmed	16565220	Phosphoproteome analysis of the human mitotic spindle.		Pubmed	1.35e-27	2.59e-23	6.47e-24	6.75e-23	22	210	KIF18A,KIF23,CENPE,CENPF,DLGAP5,CENPU,KIF4A,BIRC5,HMMR,PRC1,ARHGAP11A,EZH2,NCAPH,KIF20A,NCAPG,NDC80,TPX2,ASPM,CDK1,TOP2A,KIF11,AURKB
Pubmed	21440680	Genes expressed in Atoh1 neuronal lineages arising from the r1/isthmus rhombic lip.		Pubmed	9.16e-24	1.76e-19	3.52e-20	3.67e-19	16	95	FOXM1,MYCN,SPC25,MCM2,BIRC5,MCM10,PRC1,CCNB1,AURKA,CCNB2,BUB1,BUB1B,CDK1,CDC20,MAD2L1,AURKB
Pubmed	20508983	Centrosome-related genes, genetic variation, and risk of breast cancer.		Pubmed	2.12e-21	4.07e-17	6.78e-18	7.07e-17	15	102	KIF23,MCM2,CHEK1,TTK,CCNB1,NEK2,NDC80,TPX2,ASPM,CDK1,CDC25C,PLK4,KIF11,AURKB,KIF2C
Pubmed	27694478	Role of FEN1 S187 phosphorylation in counteracting oxygen-induced stress and regulating postnatal heart development.		Pubmed	2.89e-21	5.55e-17	7.93e-18	8.27e-17	13	58	POLE2,CHEK1,CCNB1,AURKA,NEK2,CCNE2,BUB1,BUB1B,EXO1,KIF14,CDC6,DNA2,AURKB
Pubmed	32076268	Gene expression and cell identity controlled by anaphase-promoting complex.		Pubmed	2.8e-20	5.38e-16	6.72e-17	7.02e-16	13	68	FOXM1,KIF18A,UBE2C,CCNA2,CCNB1,AURKA,NEK2,FBXO5,BUB1B,TPX2,CDC20,MAD2L1,AURKB
Pubmed	25281560	Proximity biotinylation and affinity purification are complementary approaches for the interactome mapping of chromatin-associated protein complexes.		Pubmed	2.42e-19	4.64e-15	5.15e-16	5.38e-15	24	645	FOXM1,NUSAP1,KIF18A,KIF23,DLGAP5,KIF4A,BIRC5,MCM10,PRC1,ARHGAP11A,CCNA2,CEP55,KIF20A,NCAPG,HMGA2,NDC80,BUB1B,TPX2,KIF14,KIF18B,KIF11,AURKB,KIF2C,HELLS
Pubmed	25750436	MASTL promotes cyclin B1 destruction by enforcing Cdc20-independent binding of cyclin B1 to the APC/C.		Pubmed	7.57e-18	1.45e-13	1.45e-14	1.52e-13	8	13	CCNA2,CCNB1,NEK2,FBXO5,BUB1B,CDK1,CDC20,MAD2L1
Pubmed	11416179	All kinesin superfamily protein, KIF, genes in mouse and human.		Pubmed	1.14e-17	2.19e-13	1.99e-14	2.08e-13	10	36	KIF18A,KIF23,CENPE,KIF4A,KIF20A,KIF15,KIF14,KIF18B,KIF11,KIF2C
Pubmed	26912231	The Bub1-Plk1 kinase complex promotes spindle checkpoint signalling through Cdc20 phosphorylation.		Pubmed	6.77e-16	1.3e-11	9.99e-13	1.04e-11	7	11	UBE2C,CCNB1,BUB1,BUB1B,CDK1,CDC20,MAD2L1
Pubmed	15843429	Functional analysis of human microtubule-based motor proteins, the kinesins and dyneins, in mitosis/cytokinesis using RNA interference.		Pubmed	6.77e-16	1.3e-11	9.99e-13	1.04e-11	7	11	KIF23,CENPE,KIF4A,KIF20A,KIF14,KIF11,KIF2C
Pubmed	20467437	Direct interaction between hnRNP-M and CDC5L/PLRG1 proteins affects alternative splice site choice.		Pubmed	1.4e-15	2.69e-11	1.92e-12	2e-11	20	582	KIF4A,CHD7,CHEK1,NCAPH,TTK,CCNB1,AURKA,NCAPG,NDC80,FANCI,BUB1,BUB1B,TPX2,CDK1,CDC20,TOP2A,KIF11,AURKB,KIF2C,HELLS
Pubmed	28923932	Cell cycle-targeting microRNAs promote differentiation by enforcing cell-cycle exit.		Pubmed	1.84e-15	3.53e-11	2.35e-12	2.46e-11	8	22	MYCN,CCNA2,CCNB1,AURKA,CCNB2,CCNE2,CDK1,CDC25A
Pubmed	26638075	A Dynamic Protein Interaction Landscape of the Human Centrosome-Cilium Interface.		Pubmed	2.23e-14	4.27e-10	2.67e-11	2.79e-10	30	1820	KIF23,CLGN,CENPE,DLGAP5,SPC25,MCM2,TUBB2B,HMMR,MCM10,PRC1,RRM2,NCAPH,TTK,CCNA2,CCNB1,CEP55,KIF20A,AURKA,NEK2,NDC80,CCNB2,FANCI,UNC5C,KIF14,CDC20,CDC25C,PLK4,TOP2A,AURKB,KIF2C
Pubmed	26972000	Substrate-Trapped Interactors of PHD3 and FIH Cluster in Distinct Signaling Pathways.		Pubmed	6.8e-13	1.3e-08	7.67e-10	8.01e-09	26	1517	SLC25A21,CENPF,DLGAP5,HJURP,TUBB2B,HMMR,NCAPH,TTK,CEP55,AURKA,NCAPG,NDC80,FANCI,BUB1B,TPX2,ASPM,EXO1,KIF14,CDK1,CDC6,CDC20,CDC25A,MAD2L1,AURKB,KIF2C,HELLS
Pubmed	16431929	KIF14 and citron kinase act together to promote efficient cytokinesis.		Pubmed	1.46e-12	2.8e-08	1.56e-09	1.62e-08	5	6	KIF23,KIF4A,PRC1,KIF20A,KIF14
Pubmed	23791783	Catalytic assembly of the mitotic checkpoint inhibitor BubR1-Cdc20 by a Mad2-induced functional switch in Cdc20.		Pubmed	5.1e-12	9.78e-08	5.15e-09	5.37e-08	5	7	UBE2C,CCNB1,BUB1B,CDC20,MAD2L1
Pubmed	17360335	Inhibitory factors associated with anaphase-promoting complex/cylosome in mitotic checkpoint.		Pubmed	1.36e-11	2.6e-07	1.24e-08	1.29e-07	5	8	UBE2C,CCNB1,BUB1B,CDC20,MAD2L1
Pubmed	24151075	Monopolar spindle 1 (MPS1) kinase promotes production of closed MAD2 (C-MAD2) conformer and assembly of the mitotic checkpoint complex.		Pubmed	1.36e-11	2.6e-07	1.24e-08	1.29e-07	5	8	TTK,CCNB1,BUB1B,CDC20,MAD2L1
Pubmed	27634302	Dynamic Protein Interactions of the Polycomb Repressive Complex 2 during Differentiation of Pluripotent Cells.		Pubmed	1.72e-11	3.29e-07	1.5e-08	1.56e-07	15	469	MCM2,CHD7,EYA1,EZH2,NCAPH,CCNB1,KIF20A,NCAPG,HMGA2,FANCI,TPX2,DNA2,TOP2A,AURKB,HELLS
Pubmed	25852190	Integrative analysis of kinase networks in TRAIL-induced apoptosis provides a source of potential targets for combination therapy.		Pubmed	2.67e-11	5.12e-07	2.22e-08	2.32e-07	14	401	CDKN3,CHEK1,CCNA2,CCNB1,AURKA,LMNB1,NDC80,CCNB2,CCNE2,BUB1,BUB1B,CDK1,CDC20,MAD2L1
Pubmed	10366450	Characterization of MAD2B and other mitotic spindle checkpoint genes.		Pubmed	3.04e-11	5.84e-07	2.34e-08	2.44e-07	5	9	TTK,BUB1,BUB1B,CDC20,MAD2L1
Pubmed	23288039	Mechanisms controlling the temporal degradation of Nek2A and Kif18A by the APC/C-Cdc20 complex.		Pubmed	3.04e-11	5.84e-07	2.34e-08	2.44e-07	5	9	KIF18A,UBE2C,CCNB1,NEK2,CDC20
Pubmed	30804502	H4K20me0 recognition by BRCA1-BARD1 directs homologous recombination to sister chromatids.		Pubmed	5.99e-11	1.15e-06	4.16e-08	4.34e-07	22	1294	NUSAP1,KIF23,CENPF,DLGAP5,KIF4A,CHD7,PRC1,ARHGAP11A,EZH2,KIF20A,AURKA,HOXA11,LMNB1,CCNB2,TPX2,EXO1,CDC6,KIF18B,SIX2,TOP2A,KIF2C,HELLS
Pubmed	25669885	The ABBA motif binds APC/C activators and is shared by APC/C substrates and regulators.		Pubmed	6.07e-11	1.17e-06	4.16e-08	4.34e-07	5	10	CCNA2,BUB1,BUB1B,CDC20,MAD2L1
Pubmed	24358021	Polycomb protein SCML2 regulates the cell cycle by binding and modulating CDK/CYCLIN/p21 complexes.		Pubmed	6.07e-11	1.17e-06	4.16e-08	4.34e-07	5	10	CCNA2,CCNB1,CCNB2,CCNE2,CDK1
Pubmed	30765611	Overexpression of BUB1B, CCNA2, CDC20, and CDK1 in tumor tissues predicts poor survival in pancreatic ductal adenocarcinoma.		Pubmed	8.29e-11	1.59e-06	5.3e-08	5.53e-07	4	4	CCNA2,BUB1B,CDK1,CDC20
Pubmed	15297875	Essential roles of KIF4 and its binding partner PRC1 in organized central spindle midzone formation.		Pubmed	8.29e-11	1.59e-06	5.3e-08	5.53e-07	4	4	KIF23,CENPE,KIF4A,PRC1
Pubmed	15226823	Genomic analysis of mouse retinal development.		Pubmed	9.84e-11	1.89e-06	6.09e-08	6.36e-07	19	952	MYCN,SOX11,HJURP,SPC25,PBK,BIRC5,ARHGAP11A,NCAPH,AURKA,CDK5R1,KIF15,LMNB1,UNC5C,NEIL3,GREB1,TMEM35A,NPY,AURKB,HELLS
Pubmed	29215012	REST regulates the cell cycle for cardiac development and regeneration.		Pubmed	1.11e-10	2.13e-06	6.46e-08	6.74e-07	5	11	CCNB1,CCNB2,CCNE2,CDK1,AURKB
Pubmed	29973362	Cezanne/OTUD7B is a cell cycle-regulated deubiquitinase that antagonizes the degradation of APC/C substrates.		Pubmed	1.11e-10	2.13e-06	6.46e-08	6.74e-07	5	11	FOXM1,UBE2C,CCNB1,AURKA,CDC20
Pubmed	17388661	Exquisite sensitivity of TP53 mutant and basal breast cancers to a dose-dense epirubicin-cyclophosphamide regimen.		Pubmed	1.21e-10	2.31e-06	6.81e-08	7.1e-07	6	25	TTK,CCNB1,CCNB2,BUB1,CDC20,TOP2A
Pubmed	21737879	VIP blockade leads to microcephaly in mice via disruption of Mcph1-Chk1 signaling.		Pubmed	1.56e-10	3e-06	8.57e-08	8.95e-07	6	26	CHEK1,CCNA2,CCNB1,ASPM,CDK1,CDC25C
Pubmed	26387737	Parkin Regulates Mitosis and Genomic Stability through Cdc20/Cdh1.		Pubmed	1.9e-10	3.64e-06	9.85e-08	1.03e-06	5	12	CCNB1,AURKA,NEK2,CDC20,AURKB
Pubmed	23007648	Mad2 and the APC/C compete for the same site on Cdc20 to ensure proper chromosome segregation.		Pubmed	1.9e-10	3.64e-06	9.85e-08	1.03e-06	5	12	UBE2C,CCNA2,BUB1B,CDC20,MAD2L1
Pubmed	32416067	Synthetic Lethal and Resistance Interactions with BET Bromodomain Inhibitors in Triple-Negative Breast Cancer.		Pubmed	2.83e-10	5.43e-06	1.43e-07	1.49e-06	19	1014	NUSAP1,KIF23,UBE2C,KIF4A,MCM2,PRC1,NCAPH,GINS1,CCNA2,AURKA,NCAPG,FANCI,TPX2,GINS2,CDK1,TOP2A,MAD2L1,AURKB,HELLS
Pubmed	15531365	The mouse Forkhead Box m1 transcription factor is essential for hepatoblast mitosis and development of intrahepatic bile ducts and vessels during liver morphogenesis.		Pubmed	3.08e-10	5.91e-06	1.51e-07	1.58e-06	5	13	FOXM1,CCNA2,CCNB1,CDK1,AURKB
Pubmed	22516201	Atypical E2F repressors and activators coordinate placental development.		Pubmed	3.99e-10	7.66e-06	1.55e-07	1.62e-06	6	30	CHEK1,MCM10,CCNB1,GINS2,CDC6,HELLS
Pubmed	15311285	Centrosome-associated Chk1 prevents premature activation of cyclin-B-Cdk1 kinase.		Pubmed	4.12e-10	7.91e-06	1.55e-07	1.62e-06	4	5	CHEK1,NEK2,CDK1,CDC25A
Pubmed	10864927	An essential phosphorylation-site domain of human cdc25C interacts with both 14-3-3 and cyclins.		Pubmed	4.12e-10	7.91e-06	1.55e-07	1.62e-06	4	5	CCNA2,CCNB1,CDK1,CDC25C
Pubmed	8475101	Cdc25M2 activation of cyclin-dependent kinases by dephosphorylation of threonine-14 and tyrosine-15.		Pubmed	4.12e-10	7.91e-06	1.55e-07	1.62e-06	4	5	CCNA2,CCNB1,CDK1,CDC25C
Pubmed	1828290	Dephosphorylation and activation of a p34cdc2/cyclin B complex in vitro by human CDC25 protein.		Pubmed	4.12e-10	7.91e-06	1.55e-07	1.62e-06	4	5	CCNB1,CDK1,CDC25A,CDC25C
Pubmed	15525512	Phosphorylation of Cdc20 by Bub1 provides a catalytic mechanism for APC/C inhibition by the spindle checkpoint.		Pubmed	4.12e-10	7.91e-06	1.55e-07	1.62e-06	4	5	BUB1,BUB1B,CDC20,MAD2L1
Pubmed	19098431	APC/C- and Mad2-mediated degradation of Cdc20 during spindle checkpoint activation.		Pubmed	4.12e-10	7.91e-06	1.55e-07	1.62e-06	4	5	CCNA2,BUB1B,CDC20,MAD2L1
Pubmed	19820702	UBE2S elongates ubiquitin chains on APC/C substrates to promote mitotic exit.		Pubmed	4.12e-10	7.91e-06	1.55e-07	1.62e-06	4	5	UBE2C,CCNB1,BUB1B,CDC20
Pubmed	21820309	A complex of Kif18b and MCAK promotes microtubule depolymerization and is negatively regulated by Aurora kinases.		Pubmed	4.12e-10	7.91e-06	1.55e-07	1.62e-06	4	5	AURKA,KIF18B,AURKB,KIF2C
Pubmed	21472690	Expression of cell-cycle regulatory proteins BUBR1, MAD2, Aurora A, cyclin A and cyclin E in invasive ductal breast carcinomas.		Pubmed	4.12e-10	7.91e-06	1.55e-07	1.62e-06	4	5	CCNA2,AURKA,BUB1B,MAD2L1
Pubmed	17785448	A Hox-Eya-Pax complex regulates early kidney developmental gene expression.	1	Pubmed	4.12e-10	7.91e-06	1.55e-07	1.62e-06	4	5	EYA1,HOXA11,HOXD11,SIX2
Pubmed	17210994	Breast cancer risk associated with genotypic polymorphism of the mitotic checkpoint genes: a multigenic study on cancer susceptibility.		Pubmed	4.12e-10	7.91e-06	1.55e-07	1.62e-06	4	5	TTK,BUB1,BUB1B,MAD2L1
Pubmed	19591821	High-resolution gene expression analysis of the developing mouse kidney defines novel cellular compartments within the nephron progenitor population.		Pubmed	4.25e-10	8.15e-06	1.57e-07	1.64e-06	7	56	CITED1,EYA1,MEOX1,HOXA11,SALL1,HOXD11,SIX2
Pubmed	19826003	Mediator of DNA damage checkpoint 1 (MDC1) regulates mitotic progression.		Pubmed	4.78e-10	9.17e-06	1.7e-07	1.77e-06	5	14	UBE2C,CCNA2,CCNB1,CDC20,MAD2L1
Pubmed	20231385	Inner centromere formation requires hMis14, a trident kinetochore protein that specifically recruits HP1 to human chromosomes.		Pubmed	4.78e-10	9.17e-06	1.7e-07	1.77e-06	5	14	NDC80,BUB1,BUB1B,MAD2L1,AURKB
Pubmed	16964243	A probability-based approach for high-throughput protein phosphorylation analysis and site localization.		Pubmed	5.15e-10	9.88e-06	1.8e-07	1.88e-06	14	503	KIF23,CENPF,DTL,DLGAP5,KIF4A,MCM2,PRC1,RRM2,EZH2,NCAPH,FANCI,TPX2,CDC25C,TOP2A
Pubmed	32758484	Keratin 13 deficiency causes white sponge nevus in mice.		Pubmed	6.06e-10	1.16e-05	2.08e-07	2.17e-06	6	32	BIRC5,NCAPG,CCNE2,BUB1,TOP2A,AURKB
Pubmed	32152539	Paradoxical mitotic exit induced by a small molecule inhibitor of APC/C		Pubmed	7.39e-10	1.42e-05	2.45e-07	2.55e-06	6	33	UBE2C,CCNA2,CCNB1,BUB1B,CDC20,MAD2L1
Pubmed	25306918	Ubiquitin chain elongation requires E3-dependent tracking of the emerging conjugate.		Pubmed	7.39e-10	1.42e-05	2.45e-07	2.55e-06	6	33	CCNA2,NEK2,BUB1,BUB1B,CDC20,MAD2L1
Pubmed	29467282	Proteomic profiling of VCP substrates links VCP to K6-linked ubiquitylation and c-Myc function.		Pubmed	8.88e-10	1.7e-05	2.86e-07	2.99e-06	21	1353	KIF23,DLGAP5,KIF4A,MCM2,TUBB2B,CHD7,MCM10,RRM2,NCAPH,KIF20A,NCAPG,HMGA2,LMNB1,FANCI,ASPM,CDK1,CDC20,KIF18B,TOP2A,KIF11,KIF2C
Pubmed	12791985	Sensing DNA damage through ATRIP recognition of RPA-ssDNA complexes.		Pubmed	8.95e-10	1.72e-05	2.86e-07	2.99e-06	6	34	MCM2,CHEK1,MCM10,CDC6,CDC25A,CDC25C
Pubmed	32469866	Interaction of YAP with the Myb-MuvB (MMB) complex defines a transcriptional program to promote the proliferation of cardiomyocytes.		Pubmed	1.04e-09	1.99e-05	3.24e-07	3.38e-06	5	16	NUSAP1,CENPF,BIRC5,ASPM,TOP2A
Pubmed	24488929	Modulation of Eg5 activity contributes to mitotic spindle checkpoint activation and Tat-mediated apoptosis in CD4-positive T-lymphocytes.		Pubmed	1.23e-09	2.37e-05	3.24e-07	3.38e-06	4	6	BUB1,BUB1B,MAD2L1,KIF11
Pubmed	21874044	Regulation of APC/CCdc20 activity by RASSF1A-APC/CCdc20 circuitry.		Pubmed	1.23e-09	2.37e-05	3.24e-07	3.38e-06	4	6	UBE2C,AURKA,CDC20,AURKB
Pubmed	11836499	BRCA1 regulates the G2/M checkpoint by activating Chk1 kinase upon DNA damage.		Pubmed	1.23e-09	2.37e-05	3.24e-07	3.38e-06	4	6	CHEK1,CCNB1,CDK1,CDC25C
Pubmed	19465021	A nucleolar protein RRS1 contributes to chromosome congression.		Pubmed	1.23e-09	2.37e-05	3.24e-07	3.38e-06	4	6	CENPE,BUB1,BUB1B,AURKB
Pubmed	17443186	Ubiquitination by the anaphase-promoting complex drives spindle checkpoint inactivation.		Pubmed	1.23e-09	2.37e-05	3.24e-07	3.38e-06	4	6	UBE2C,BUB1B,CDC20,MAD2L1
Pubmed	16751065	HIV-1 Tat depresses DNA-PK(CS) expression and DNA repair, and sensitizes cells to ionizing radiation.		Pubmed	1.23e-09	2.37e-05	3.24e-07	3.38e-06	4	6	CCNB1,CDC20,CDC25C,KIF2C
Pubmed	7474100	Human immunodeficiency virus type 1 Vpr arrests the cell cycle in G2 by inhibiting the activation of p34cdc2-cyclin B.		Pubmed	1.23e-09	2.37e-05	3.24e-07	3.38e-06	4	6	CCNB1,CCNB2,CDK1,CDC25C
Pubmed	19357306	A single amino acid change converts Aurora-A into Aurora-B-like kinase in terms of partner specificity and cellular function.		Pubmed	1.23e-09	2.37e-05	3.24e-07	3.38e-06	4	6	BIRC5,AURKA,TPX2,AURKB
Pubmed	27694884	SUMOylated NKAP is essential for chromosome alignment by anchoring CENP-E to kinetochores.		Pubmed	1.23e-09	2.37e-05	3.24e-07	3.38e-06	4	6	CENPE,BUB1,BUB1B,CDC20
Pubmed	18195732	Cyclin B1 is localized to unattached kinetochores and contributes to efficient microtubule attachment and proper chromosome alignment during mitosis.		Pubmed	1.23e-09	2.37e-05	3.24e-07	3.38e-06	4	6	CCNB1,NDC80,CDK1,AURKB
Pubmed	17268814	Genetic variation in the major mitotic checkpoint genes does not affect familial breast cancer risk.		Pubmed	1.23e-09	2.37e-05	3.24e-07	3.38e-06	4	6	CENPE,TTK,BUB1B,MAD2L1
Pubmed	29432156	Role of ubiquitylation of components of mitotic checkpoint complex in their dissociation from anaphase-promoting complex/cyclosome.		Pubmed	1.23e-09	2.37e-05	3.24e-07	3.38e-06	4	6	UBE2C,BUB1B,CDC20,MAD2L1
Pubmed	23160376	Transcriptional intermediary factor 1? binds to the anaphase-promoting complex/cyclosome and promotes mitosis.		Pubmed	1.47e-09	2.81e-05	3.8e-07	3.97e-06	5	17	CCNA2,NEK2,BUB1B,CDC20,MAD2L1
Pubmed	29656893	DNA Repair Network Analysis Reveals Shieldin as a Key Regulator of NHEJ and PARP Inhibitor Sensitivity.		Pubmed	1.53e-09	2.94e-05	3.92e-07	4.1e-06	13	453	KIF18A,KIF23,BRIP1,CENPF,CENPU,OIP5,MCM10,PRC1,FANCI,TPX2,PRAME,MAD2L1,KIF2C
Pubmed	33147210	Loss of hepatocyte cell division leads to liver inflammation and fibrosis.		Pubmed	2.02e-09	3.88e-05	5.04e-07	5.27e-06	5	18	CHEK1,CCNA2,CCNB1,AURKA,CDK1
Pubmed	22193957	BubR1 blocks substrate recruitment to the APC/C in a KEN-box-dependent manner.		Pubmed	2.02e-09	3.88e-05	5.04e-07	5.27e-06	5	18	UBE2C,CCNB1,BUB1B,CDC20,MAD2L1
Pubmed	26657772	The apical complex protein Pals1 is required to maintain cerebellar progenitor cells in a proliferative state.		Pubmed	2.15e-09	4.12e-05	5.15e-07	5.37e-06	6	39	PBK,BIRC5,MCM10,AURKA,BUB1B,CDC20
Pubmed	19738611	Cell cycle genes and ovarian cancer susceptibility: a tagSNP analysis.		Pubmed	2.15e-09	4.12e-05	5.15e-07	5.37e-06	6	39	CCNA2,CCNB1,CCNB2,CCNE2,CDC20,CDC25A
Pubmed	18270576	Individual retinal progenitor cells display extensive heterogeneity of gene expression.		Pubmed	2.15e-09	4.12e-05	5.15e-07	5.37e-06	6	39	FOXM1,UBE2C,SPC25,RRM2,CCNB2,CDC20
Pubmed	29632206	Neddylation mediates ventricular chamber maturation through repression of Hippo signaling.		Pubmed	2.52e-09	4.83e-05	5.96e-07	6.23e-06	6	40	BIRC5,CCNA2,CCNB1,AURKA,CDC20,AURKB
Pubmed	17679094	APC/C(Cdc20) controls the ubiquitin-mediated degradation of p21 in prometaphase.		Pubmed	2.87e-09	5.51e-05	6.19e-07	6.46e-06	4	7	CCNA2,CCNB1,CDK1,CDC20
Pubmed	31455778	Cyclin A2 degradation during the spindle assembly checkpoint requires multiple binding modes to the APC/C.		Pubmed	2.87e-09	5.51e-05	6.19e-07	6.46e-06	4	7	UBE2C,CCNA2,CCNB1,CDC20
Pubmed	19716816	Non-homeodomain regions of Hox proteins mediate activation versus repression of Six2 via a single enhancer site in vivo.		Pubmed	2.87e-09	5.51e-05	6.19e-07	6.46e-06	4	7	EYA1,HOXA11,HOXD11,SIX2
Pubmed	25482201	The internal Cdc20 binding site in BubR1 facilitates both spindle assembly checkpoint signalling and silencing.		Pubmed	2.87e-09	5.51e-05	6.19e-07	6.46e-06	4	7	CCNB1,BUB1B,CDC20,MAD2L1
Pubmed	9520381	HIV-1 Vpr interacts with a human 34-kDa mov34 homologue, a cellular factor linked to the G2/M phase transition of the mammalian cell cycle.		Pubmed	2.87e-09	5.51e-05	6.19e-07	6.46e-06	4	7	CCNB1,CCNB2,CDK1,CDC25C
Pubmed	20733051	How cyclin A destruction escapes the spindle assembly checkpoint.		Pubmed	2.87e-09	5.51e-05	6.19e-07	6.46e-06	4	7	CCNA2,CCNB1,BUB1B,CDC20
Pubmed	25246557	Bimodal activation of BubR1 by Bub3 sustains mitotic checkpoint signaling.		Pubmed	2.87e-09	5.51e-05	6.19e-07	6.46e-06	4	7	UBE2C,CCNB1,BUB1B,CDC20
Pubmed	27522463	Cryo-EM of Mitotic Checkpoint Complex-Bound APC/C Reveals Reciprocal and Conformational Regulation of Ubiquitin Ligation.		Pubmed	2.87e-09	5.51e-05	6.19e-07	6.46e-06	4	7	UBE2C,CCNA2,CCNB1,CDC20
Pubmed	15504738	Genes affecting the cell cycle, growth, maintenance, and drug sensitivity are preferentially regulated by anti-HER2 antibody through phosphatidylinositol 3-kinase-AKT signaling.		Pubmed	3.65e-09	6.99e-05	7.69e-07	8.02e-06	5	20	UBE2C,AURKA,NDC80,BUB1B,TOP2A
Pubmed	11742988	APC/C-mediated destruction of the centrosomal kinase Nek2A occurs in early mitosis and depends upon a cyclin A-type D-box.		Pubmed	3.65e-09	6.99e-05	7.69e-07	8.02e-06	5	20	UBE2C,NEK2,BUB1B,CDC20,MAD2L1
Pubmed	26687479	The variant Polycomb Repressor Complex 1 component PCGF1 interacts with a pluripotency sub-network that includes DPPA4, a regulator of embryogenesis.		Pubmed	3.68e-09	7.07e-05	7.69e-07	8.02e-06	12	396	CENPF,PEG10,POLE2,MCM2,TUBB2B,CHD7,PRC1,EZH2,HMGA2,SALL1,FANCI,KIF11
Pubmed	19283064	Sequential assembly of centromeric proteins in male mouse meiosis.		Pubmed	5.73e-09	0.00011	1.13e-06	1.18e-05	4	8	CENPE,BUB1B,AURKB,KIF2C
Pubmed	12050119	Hox11 paralogous genes are essential for metanephric kidney induction.	1	Pubmed	5.73e-09	0.00011	1.13e-06	1.18e-05	4	8	EYA1,HOXA11,HOXD11,SIX2
Pubmed	10339564	Multistep regulation of DNA replication by Cdk phosphorylation of HsCdc6.		Pubmed	5.73e-09	0.00011	1.13e-06	1.18e-05	4	8	CCNA2,CCNB1,CDK1,CDC6
Pubmed	23239745	Daxx regulates mitotic progression and prostate cancer predisposition.		Pubmed	5.73e-09	0.00011	1.13e-06	1.18e-05	4	8	CCNB1,BUB1B,CDC20,MAD2L1
Pubmed	9371520	The role of Cdc2 feedback loop control in the DNA damage checkpoint in mammalian cells.		Pubmed	5.73e-09	0.00011	1.13e-06	1.18e-05	4	8	CCNA2,CCNB1,CDK1,CDC25C
Pubmed	24453338	A novel function for Foxm1 in interkinetic nuclear migration in the developing telencephalon and anxiety-related behavior.		Pubmed	6.16e-09	0.000118	1.21e-06	1.26e-05	5	22	FOXM1,CCNA2,CCNB1,AURKA,AURKB
Pubmed	18787044	Fras1, a basement membrane-associated protein mutated in Fraser syndrome, mediates both the initiation of the mammalian kidney and the integrity of renal glomeruli.		Pubmed	7.85e-09	0.000151	1.51e-06	1.57e-05	5	23	ITGA8,EYA1,SALL1,HOXD11,SIX2
Pubmed	24478334	Deletion of yes-associated protein (YAP) specifically in cardiac and vascular smooth muscle cells reveals a crucial role for YAP in mouse cardiovascular development.		Pubmed	7.85e-09	0.000151	1.51e-06	1.57e-05	5	23	FOXM1,AURKA,CDK1,CDC20,AURKB
Pubmed	21336306	How APC/C-Cdc20 changes its substrate specificity in?mitosis.		Pubmed	1.03e-08	0.000197	1.88e-06	1.96e-05	4	9	CCNA2,CCNB1,BUB1B,CDC20
Pubmed	20733055	The APC/C recruits cyclin B1-Cdk1-Cks in prometaphase before D box recognition to control mitotic exit.		Pubmed	1.03e-08	0.000197	1.88e-06	1.96e-05	4	9	UBE2C,CCNB1,CDK1,CDC20
Pubmed	18471975	Cdc20 and Cks direct the spindle checkpoint-independent destruction of cyclin A.		Pubmed	1.03e-08	0.000197	1.88e-06	1.96e-05	4	9	CCNA2,CCNB1,CDK1,CDC20
Pubmed	24705021	Phosphorylation of EXO1 by CDKs 1 and 2 regulates DNA end resection and repair pathway choice.		Pubmed	1.03e-08	0.000197	1.88e-06	1.96e-05	4	9	CCNA2,CCNB1,EXO1,CDK1
Pubmed	22957921	Cell cycle regulation in mouse heart during embryonic and postnatal stages.		Pubmed	1.03e-08	0.000197	1.88e-06	1.96e-05	4	9	CCNA2,CCNB1,CCNE2,CDK1
Pubmed	20453000	A Large-scale genetic association study of esophageal adenocarcinoma risk.		Pubmed	1.2e-08	0.000231	2.18e-06	2.28e-05	11	351	BIRC5,CHEK1,CCNA2,CCNB1,AURKA,BUB1B,EXO1,RGS17,CDC25A,CDC25C,NPY
Pubmed	9885575	PRC1: a human mitotic spindle-associated CDK substrate protein required for cytokinesis.		Pubmed	1.71e-08	0.000328	3.01e-06	3.14e-05	4	10	PRC1,CCNA2,CCNB1,CDK1
Pubmed	19468067	Mitotic control of kinetochore-associated dynein and spindle orientation by human Spindly.		Pubmed	1.71e-08	0.000328	3.01e-06	3.14e-05	4	10	NDC80,BUB1B,MAD2L1,AURKB
Pubmed	25673878	Nek2A destruction marks APC/C activation at the prophase-to-prometaphase transition by spindle-checkpoint-restricted Cdc20.		Pubmed	1.71e-08	0.000328	3.01e-06	3.14e-05	4	10	NEK2,BUB1B,CDC20,MAD2L1
Pubmed	21731673	Deterministic and stochastic allele specific gene expression in single mouse blastomeres.		Pubmed	2.12e-08	0.000407	3.36e-06	3.51e-05	11	371	SOX11,EZH2,SUV39H2,CCNA2,CCNB1,KIF20A,SALL1,CCNB2,FZD10,CDK1,CDC20
Pubmed	27880917	Phenotypic and Interaction Profiling of the Human Phosphatases Identifies Diverse Mitotic Regulators.		Pubmed	2.22e-08	0.000427	3.36e-06	3.51e-05	17	1048	NUSAP1,KIF18A,EYA1,CEP55,NCAPG,KIF15,CCNB2,FANCI,KIF14,CDK1,CDC25A,CDC25C,PLK4,SIX2,MAD2L1,AURKB,HELLS
Pubmed	7514534	Sequence and expression of murine type I hair keratins mHa2 and mHa3.		Pubmed	2.68e-08	0.000515	3.36e-06	3.51e-05	4	11	CENPE,KIF15,KIF14,KIF11
Pubmed	10766737	Analysis of promoter binding by the E2F and pRB families in vivo: distinct E2F proteins mediate activation and repression.		Pubmed	2.68e-08	0.000515	3.36e-06	3.51e-05	4	11	CCNA2,CDK1,CDC6,CDC25A
Pubmed	19376971	Role of Filia, a maternal effect gene, in maintaining euploidy during cleavage-stage mouse embryogenesis.		Pubmed	2.68e-08	0.000515	3.36e-06	3.51e-05	4	11	CCNB1,AURKA,TPX2,MAD2L1
Pubmed	22442484	MARF1 regulates essential oogenic processes in mice.		Pubmed	2.68e-08	0.000515	3.36e-06	3.51e-05	4	11	CCNB1,CDK1,CDC25A,CDC25C
Pubmed	23328114	Genomic imbalance of HMMR/RHAMM regulates the sensitivity and response of malignant peripheral nerve sheath tumour cells to aurora kinase inhibition.		Pubmed	2.78e-08	0.000534	3.36e-06	3.51e-05	3	3	HMMR,AURKA,TPX2
Pubmed	15611331	The spindle assembly checkpoint is not essential for CSF arrest of mouse oocytes.		Pubmed	2.78e-08	0.000534	3.36e-06	3.51e-05	3	3	BUB1,BUB1B,MAD2L1
Pubmed	25698537	BUB1B promotes multiple myeloma cell proliferation through CDC20/CCNB axis.		Pubmed	2.78e-08	0.000534	3.36e-06	3.51e-05	3	3	CCNB1,BUB1,CDC20
Pubmed	16600213	Spindle checkpoint function requires Mad2-dependent Cdc20 binding to the Mad3 homology domain of BubR1.		Pubmed	2.78e-08	0.000534	3.36e-06	3.51e-05	3	3	BUB1B,CDC20,MAD2L1
Pubmed	1717476	Human cyclins A and B1 are differentially located in the cell and undergo cell cycle-dependent nuclear transport.		Pubmed	2.78e-08	0.000534	3.36e-06	3.51e-05	3	3	CCNB1,CCNB2,CDK1
Pubmed	19134343	[Molecules of G(2)/M phase and the phosphorylation of survivin in the carcinogenesis of oral submucosal fibrosis].		Pubmed	2.78e-08	0.000534	3.36e-06	3.51e-05	3	3	BIRC5,CCNB1,CDK1
Pubmed	25637637	Proteins of the mitotic checkpoint and spindle are related to chromosomal instability and unfavourable prognosis in patients with myelodysplastic syndrome.		Pubmed	2.78e-08	0.000534	3.36e-06	3.51e-05	3	3	CDC20,MAD2L1,AURKB
Pubmed	20368335	Pro-apoptotic role of Cdc25A: activation of cyclin B1/Cdc2 by the Cdc25A C-terminal domain.		Pubmed	2.78e-08	0.000534	3.36e-06	3.51e-05	3	3	CCNB1,CDK1,CDC25A
Pubmed	32863381	CDK1, CCNB1, and CCNB2 are Prognostic Biomarkers and Correlated with Immune Infiltration in Hepatocellular Carcinoma.		Pubmed	2.78e-08	0.000534	3.36e-06	3.51e-05	3	3	CCNB1,CCNB2,CDK1
Pubmed	30816525	Expression profiles analysis identifies the values of carcinogenesis and the prognostic prediction of three genes in adrenocortical carcinoma.		Pubmed	2.78e-08	0.000534	3.36e-06	3.51e-05	3	3	NDC80,CCNB2,TOP2A
Pubmed	15541388	Characterization of a MAPKK-like protein kinase TOPK.		Pubmed	2.78e-08	0.000534	3.36e-06	3.51e-05	3	3	PBK,CCNB1,CDK1
Pubmed	33896262	Expression and prognostic value of		Pubmed	2.78e-08	0.000534	3.36e-06	3.51e-05	3	3	CCNA2,CCNB1,CDK1
Pubmed	11907259	Checkpoint protein BubR1 acts synergistically with Mad2 to inhibit anaphase-promoting complex.		Pubmed	2.78e-08	0.000534	3.36e-06	3.51e-05	3	3	BUB1B,CDC20,MAD2L1
Pubmed	24747134	Chk1 is required for the metaphase-anaphase transition via regulating the expression and localization of Cdc20 and Mad2.		Pubmed	2.78e-08	0.000534	3.36e-06	3.51e-05	3	3	CHEK1,CDC20,MAD2L1
Pubmed	7737117	Human cyclins B1 and B2 are localized to strikingly different structures: B1 to microtubules, B2 primarily to the Golgi apparatus.		Pubmed	2.78e-08	0.000534	3.36e-06	3.51e-05	3	3	CCNB1,CCNB2,CDK1
Pubmed	20360007	Cdc25 phosphatases are required for timely assembly of CDK1-cyclin B at the G2/M transition.		Pubmed	2.78e-08	0.000534	3.36e-06	3.51e-05	3	3	CCNB1,CDK1,CDC25C
Pubmed	21407176	Evidence that Aurora B is implicated in spindle checkpoint signalling independently of error correction.		Pubmed	2.78e-08	0.000534	3.36e-06	3.51e-05	3	3	BUB1B,CDC20,MAD2L1
Pubmed	29330624	Functional transcriptomic annotation and protein-protein interaction network analysis identify NEK2, BIRC5, and TOP2A as potential targets in obese patients with luminal A breast cancer.		Pubmed	2.78e-08	0.000534	3.36e-06	3.51e-05	3	3	BIRC5,NEK2,TOP2A
Pubmed	20660152	The roles of cyclin A2, B1, and B2 in early and late mitotic events.		Pubmed	2.78e-08	0.000534	3.36e-06	3.51e-05	3	3	CCNA2,CCNB1,CCNB2
Pubmed	9763420	Characterization of the kinetochore binding domain of CENP-E reveals interactions with the kinetochore proteins CENP-F and hBUBR1.		Pubmed	2.78e-08	0.000534	3.36e-06	3.51e-05	3	3	CENPE,CENPF,BUB1B
Pubmed	17359356	Mutational and expression analysis of CDK1, cyclinA2 and cyclinB1 in epilepsy-associated glioneuronal lesions.		Pubmed	2.78e-08	0.000534	3.36e-06	3.51e-05	3	3	CCNA2,CCNB1,CDK1
Pubmed	18708766	Aurora A, Aurora B and survivin are novel targets of transcriptional regulation by histone deacetylase inhibitors in non-small cell lung cancer.		Pubmed	2.78e-08	0.000534	3.36e-06	3.51e-05	3	3	BIRC5,AURKA,AURKB
Pubmed	12355205	Simultaneous analysis of chromosomes and chromosome-associated proteins in mammalian oocytes and embryos.		Pubmed	2.78e-08	0.000534	3.36e-06	3.51e-05	3	3	CENPE,BUB1,MAD2L1
Pubmed	19154723	BubR1 N terminus acts as a soluble inhibitor of cyclin B degradation by APC/C(Cdc20) in interphase.		Pubmed	2.78e-08	0.000534	3.36e-06	3.51e-05	3	3	CCNB1,BUB1B,CDC20
Pubmed	19154722	Unattached kinetochores catalyze production of an anaphase inhibitor that requires a Mad2 template to prime Cdc20 for BubR1 binding.		Pubmed	2.78e-08	0.000534	3.36e-06	3.51e-05	3	3	BUB1B,CDC20,MAD2L1
Pubmed	24756216	BUB1 mRNA is significantly co-expressed with AURKA and AURKB mRNA in advanced-stage ovarian serous carcinoma.		Pubmed	2.78e-08	0.000534	3.36e-06	3.51e-05	3	3	AURKA,BUB1,AURKB
Pubmed	11274370	Mammalian mad2 and bub1/bubR1 recognize distinct spindle-attachment and kinetochore-tension checkpoints.		Pubmed	2.78e-08	0.000534	3.36e-06	3.51e-05	3	3	BUB1B,CDC20,MAD2L1
Pubmed	15654331	FoxM1 is required for execution of the mitotic programme and chromosome stability.		Pubmed	2.78e-08	0.000534	3.36e-06	3.51e-05	3	3	FOXM1,CENPF,CCNB1
Pubmed	20459534	Spindle proteins in resected pancreatic head adenocarcinomas: BubR1 is an independent prognostic factor in pancreatobiliary-type tumours.		Pubmed	2.78e-08	0.000534	3.36e-06	3.51e-05	3	3	AURKA,BUB1B,MAD2L1
Pubmed	23405241	Mitosis is a source of potential markers for screening and survival and therapeutic targets in cervical cancer.		Pubmed	2.78e-08	0.000534	3.36e-06	3.51e-05	3	3	NUSAP1,CDKN3,CDC20
Pubmed	9914370	The hBUB1 and hBUBR1 kinases sequentially assemble onto kinetochores during prophase with hBUBR1 concentrating at the kinetochore plates in mitosis.		Pubmed	2.78e-08	0.000534	3.36e-06	3.51e-05	3	3	CENPE,BUB1,BUB1B
Pubmed	24187132	Phosphorylation of microtubule-binding protein Hec1 by mitotic kinase Aurora B specifies spindle checkpoint kinase Mps1 signaling at the kinetochore.		Pubmed	2.78e-08	0.000534	3.36e-06	3.51e-05	3	3	TTK,NDC80,AURKB
Pubmed	30476929	Nucleolar and Spindle Associated Protein 1 (NUSAP1) Inhibits Cell Proliferation and Enhances Susceptibility to Epirubicin In Invasive Breast Cancer Cells by Regulating Cyclin D Kinase (CDK1) and DLGAP5 Expression.		Pubmed	2.78e-08	0.000534	3.36e-06	3.51e-05	3	3	NUSAP1,DLGAP5,CDK1
Pubmed	24875404	Spatial regulation of Aurora A activity during mitotic spindle assembly requires RHAMM to correctly localize TPX2.		Pubmed	2.78e-08	0.000534	3.36e-06	3.51e-05	3	3	HMMR,AURKA,TPX2
Pubmed	29748388	The kinetochore proteins CENP-E and CENP-F directly and specifically interact with distinct BUB mitotic checkpoint Ser/Thr kinases.		Pubmed	2.78e-08	0.000534	3.36e-06	3.51e-05	3	3	CENPE,CENPF,BUB1B
Pubmed	20400365	Downstream targets of FOXM1: CEP55 and HELLS are cancer progression markers of head and neck squamous cell carcinoma.		Pubmed	2.78e-08	0.000534	3.36e-06	3.51e-05	3	3	FOXM1,CEP55,HELLS
Pubmed	24488334	TPX2 overexpression in medullary thyroid carcinoma mediates TT cell proliferation.		Pubmed	2.78e-08	0.000534	3.36e-06	3.51e-05	3	3	CCNB1,AURKA,TPX2
Pubmed	25731686	Targeting the spindle assembly checkpoint for breast cancer treatment.		Pubmed	2.78e-08	0.000534	3.36e-06	3.51e-05	3	3	TTK,BUB1,AURKB
Pubmed	30588191	Elevated mRNA Levels of AURKA, CDC20 and TPX2 are associated with poor prognosis of smoking related lung adenocarcinoma using bioinformatics analysis.		Pubmed	2.78e-08	0.000534	3.36e-06	3.51e-05	3	3	AURKA,TPX2,CDC20
Pubmed	23370767	Expression profiling of 519 kinase genes in matched malignant peripheral nerve sheath tumor/plexiform neurofibroma samples is discriminatory and identifies mitotic regulators BUB1B, PBK and NEK2 as overexpressed with transformation.		Pubmed	2.78e-08	0.000534	3.36e-06	3.51e-05	3	3	PBK,NEK2,BUB1B
Pubmed	8070405	The differential localization of human cyclins A and B is due to a cytoplasmic retention signal in cyclin B.		Pubmed	2.78e-08	0.000534	3.36e-06	3.51e-05	3	3	CCNB1,CCNB2,CDK1
Pubmed	32685486	,		Pubmed	2.78e-08	0.000534	3.36e-06	3.51e-05	3	3	CCNB2,ASPM,TOP2A
Pubmed	28947820	Mps1 kinase-dependent Sgo2 centromere localisation mediates cohesin protection in mouse oocyte meiosis I.		Pubmed	2.78e-08	0.000534	3.36e-06	3.51e-05	3	3	TTK,BUB1,BUB1B
Pubmed	20981276	Germinal Cell Aplasia in Kif18a Mutant Male Mice Due to Impaired Chromosome Congression and Dysregulated BubR1 and CENP-E.		Pubmed	2.78e-08	0.000534	3.36e-06	3.51e-05	3	3	KIF18A,CENPE,BUB1B
Pubmed	24613305	Proximity interactions among centrosome components identify regulators of centriole duplication.		Pubmed	2.81e-08	0.00054	3.37e-06	3.52e-05	7	101	TTK,CEP55,AURKA,CCNB2,KIF14,CDK1,PLK4
Pubmed	15232106	Self-assembling protein microarrays.		Pubmed	3.27e-08	0.000627	3.9e-06	4.07e-05	5	30	MCM2,MCM10,CCNB2,CCNE2,CDC6
Pubmed	27248496	WDR76 Co-Localizes with Heterochromatin Related Proteins and Rapidly Responds to DNA Damage.		Pubmed	3.91e-08	0.000751	4.64e-06	4.84e-05	11	394	KIF4A,MCM2,CHD7,EZH2,NCAPH,KIF20A,NCAPG,TPX2,KIF18B,TOP2A,KIF11
Pubmed	11259605	Two immunologically distinct human DNA polymerase alpha-primase subpopulations are involved in cellular DNA replication.		Pubmed	4.01e-08	0.00077	4.64e-06	4.84e-05	4	12	MCM2,CCNA2,CCNB1,CDK1
Pubmed	21700221	Regulation of ubiquitin chain initiation to control the timing of substrate degradation.		Pubmed	4.01e-08	0.00077	4.64e-06	4.84e-05	4	12	PCLAF,UBE2C,CCNA2,CCNB1
Pubmed	7494303	Mutational analysis of cell cycle arrest, nuclear localization and virion packaging of human immunodeficiency virus type 1 Vpr.		Pubmed	4.01e-08	0.00077	4.64e-06	4.84e-05	4	12	CCNB1,CCNB2,CDK1,CDC25C
Pubmed	26986935	Conformation-specific anti-Mad2 monoclonal antibodies for the dissection of checkpoint signaling.		Pubmed	4.01e-08	0.00077	4.64e-06	4.84e-05	4	12	KIF20A,BUB1B,CDC20,MAD2L1
Pubmed	22560297	Congenital asplenia in mice and humans with mutations in a Pbx/Nkx2-5/p15 module.		Pubmed	4.59e-08	0.000881	5.22e-06	5.45e-05	8	165	MCM2,CHEK1,CCNA2,CCNB1,NEK2,CCNB2,CDC25A,MAD2L1
Pubmed	27114546	HIV-1 Vpr degrades the HLTF DNA translocase in T cells and macrophages.		Pubmed	4.6e-08	0.000882	5.22e-06	5.45e-05	5	32	CENPF,CCNB1,AURKA,AURKB,KIF2C
Pubmed	30389914	Asxl1 exerts an antiproliferative effect on mouse lung maturation via epigenetic repression of the E2f1-Nmyc axis.		Pubmed	4.6e-08	0.000882	5.22e-06	5.45e-05	5	32	MYCN,RRM2,CCNA2,CCNB1,CDC25C
Pubmed	28675297	A Human Tyrosine Phosphatase Interactome Mapped by Proteomic Profiling.		Pubmed	5.04e-08	0.000967	5.69e-06	5.94e-05	16	974	CDKN3,CLGN,POLE2,DTL,MCM2,CHEK1,EYA1,CCNB1,CEP55,AURKA,FANCI,CDK1,CDC25A,CDC25C,KIF11,KIF2C
Pubmed	24550112	Sall1 balances self-renewal and differentiation of renal progenitor cells.	1	Pubmed	5.59e-08	0.00107	6.27e-06	6.54e-05	6	66	ITGA8,CITED1,EYA1,SALL1,SIX2,NPY
Pubmed	18485340	Hoxd11 specifies a program of metanephric kidney development within the intermediate mesoderm of the mouse embryo.	1	Pubmed	5.78e-08	0.00111	6.45e-06	6.73e-05	4	13	EYA1,HOXA11,HOXD11,SIX2
Pubmed	11285280	Anaphase-promoting complex/cyclosome-dependent proteolysis of human cyclin A starts at the beginning of mitosis and is not subject to the spindle assembly checkpoint.		Pubmed	6.12e-08	0.00117	6.77e-06	7.06e-05	6	67	UBE2C,CCNB1,BUB1B,CDK1,CDC20,MAD2L1
Pubmed	21832049	Interactions of pathological hallmark proteins: tubulin polymerization promoting protein/p25, beta-amyloid, and alpha-synuclein.		Pubmed	6.14e-08	0.00118	6.77e-06	7.06e-05	22	1891	NUSAP1,PLAAT1,DLGAP5,KIF4A,MCM2,CHEK1,MCM10,TTK,MEOX1,AURKA,CDK5R1,CCNE2,FANCI,VASH2,TMEM35A,CDC20,CDC25A,SIX2,MAD2L1,AURKB,KIF2C,HELLS
Pubmed	23342106	Mechanistic target of rapamycin (Mtor) is essential for murine embryonic heart development and growth.		Pubmed	6.32e-08	0.00121	6.93e-06	7.24e-05	5	34	MYCN,CDKN3,CCNA2,CCNE2,CDK1
Pubmed	15730892	Expression of cell cycle-related proteins in developing and adult mouse hippocampus.		Pubmed	8.08e-08	0.00155	8.76e-06	9.14e-05	4	14	CCNA2,CCNB1,CCNE2,CDK1
Pubmed	17363900	The human Nup107-160 nuclear pore subcomplex contributes to proper kinetochore functions.		Pubmed	8.08e-08	0.00155	8.76e-06	9.14e-05	4	14	CENPF,NDC80,BUB1B,MAD2L1
Pubmed	30979931	A comprehensive proteomics-based interaction screen that links DYRK1A to RNF169 and to the DNA damage response.		Pubmed	8.26e-08	0.00158	8.9e-06	9.29e-05	7	118	KIF23,CENPF,DLGAP5,CEP55,KIF20A,TPX2,KIF14
Pubmed	19074885	Genetic variants in apoptosis and immunoregulation-related genes are associated with risk of chronic lymphocytic leukemia.		Pubmed	8.61e-08	0.00165	9.23e-06	9.64e-05	8	179	BIRC5,EZH2,BUB1B,EXO1,CDC6,CDC25C,TOP2A,AURKB
Pubmed	23443559	LGALS3BP regulates centriole biogenesis and centrosome hypertrophy in cancer cells.		Pubmed	8.8e-08	0.00169	9.38e-06	9.79e-05	13	639	TUBB2B,CCNA2,CCNB1,CEP55,AURKA,NEK2,CCNE2,FANCI,BUB1,BUB1B,CDC20,MAD2L1,AURKB
Pubmed	28705898	Cellular heterogeneity in the ureteric progenitor niche and distinct profiles of branching morphogenesis in organ development.		Pubmed	9.27e-08	0.00178	9.83e-06	0.000103	7	120	MYCN,PCLAF,DTL,PBK,TTK,NCAPG,BUB1
Pubmed	26811472	Control of APC/C-dependent ubiquitin chain elongation by reversible phosphorylation.		Pubmed	9.83e-08	0.00189	9.98e-06	0.000104	5	37	CCNA2,BUB1,BUB1B,CDC20,MAD2L1
Pubmed	19696745	MCM10 mediates RECQ4 association with MCM2-7 helicase complex during DNA replication.		Pubmed	1.1e-07	0.00211	9.98e-06	0.000104	4	15	MCM2,MCM10,GINS1,GINS2
Pubmed	17681274	Cell death in leukemia: passenger protein regulation by topoisomerase inhibitors.		Pubmed	1.11e-07	0.00213	9.98e-06	0.000104	3	4	BIRC5,CDK1,AURKB
Pubmed	32066746	Analysis of TET2 and EZH2 gene functions in chromosome instability in acute myeloid leukemia.		Pubmed	1.11e-07	0.00213	9.98e-06	0.000104	3	4	EZH2,CDC20,MAD2L1
Pubmed	20212161	ATP is required for the release of the anaphase-promoting complex/cyclosome from inhibition by the mitotic checkpoint.		Pubmed	1.11e-07	0.00213	9.98e-06	0.000104	3	4	BUB1B,CDC20,MAD2L1
Pubmed	15226446	The E4F protein is required for mitotic progression during embryonic cell cycles.		Pubmed	1.11e-07	0.00213	9.98e-06	0.000104	3	4	CENPE,BUB1,BUB1B
Pubmed	25625205	Functional reprogramming of polyploidization in megakaryocytes.		Pubmed	1.11e-07	0.00213	9.98e-06	0.000104	3	4	CDK1,CDC20,AURKB
Pubmed	21116854	Comparison of gene expression profiles reveals aberrant expression of FOXO1, Aurora A/B and EZH2 in lesional psoriatic skins.		Pubmed	1.11e-07	0.00213	9.98e-06	0.000104	3	4	EZH2,AURKA,AURKB
Pubmed	21813648	Protein phosphatase 2A (B55?) prevents premature activation of forkhead transcription factor FoxM1 by antagonizing cyclin A/cyclin-dependent kinase-mediated phosphorylation.		Pubmed	1.11e-07	0.00213	9.98e-06	0.000104	3	4	FOXM1,CCNA2,CDK1
Pubmed	20526282	Phosphorylation of Mcl-1 by CDK1-cyclin B1 initiates its Cdc20-dependent destruction during mitotic arrest.		Pubmed	1.11e-07	0.00213	9.98e-06	0.000104	3	4	CCNB1,CDK1,CDC20
Pubmed	28678347	TRAP1 controls cell cycle G2-M transition through the regulation of CDK1 and MAD2 expression/ubiquitination.		Pubmed	1.11e-07	0.00213	9.98e-06	0.000104	3	4	CCNB1,CDK1,MAD2L1
Pubmed	31704793	The cyclin B2/CDK1 complex inhibits separase activity in mouse oocyte meiosis I.		Pubmed	1.11e-07	0.00213	9.98e-06	0.000104	3	4	CCNB1,CCNB2,CDK1
Pubmed	33248027	BUB1 and CENP-U, Primed by CDK1, Are the Main PLK1 Kinetochore Receptors in Mitosis.		Pubmed	1.11e-07	0.00213	9.98e-06	0.000104	3	4	CENPU,BUB1,CDK1
Pubmed	11702782	Mad2-Independent inhibition of APCCdc20 by the mitotic checkpoint protein BubR1.		Pubmed	1.11e-07	0.00213	9.98e-06	0.000104	3	4	BUB1B,CDC20,MAD2L1
Pubmed	12060755	Hoxa 11 is upstream of Integrin alpha8 expression in the developing kidney.		Pubmed	1.11e-07	0.00213	9.98e-06	0.000104	3	4	ITGA8,HOXA11,HOXD11
Pubmed	23541922	Hec1-dependent cyclin B2 stabilization regulates the G2-M transition and early prometaphase in mouse oocytes.		Pubmed	1.11e-07	0.00213	9.98e-06	0.000104	3	4	CENPE,NDC80,CCNB2
Pubmed	11976319	Identification of Aurora kinases as RasGAP Src homology 3 domain-binding proteins.		Pubmed	1.11e-07	0.00213	9.98e-06	0.000104	3	4	BIRC5,AURKA,AURKB
Pubmed	21566458	Alzheimer A? disrupts the mitotic spindle and directly inhibits mitotic microtubule motors.		Pubmed	1.11e-07	0.00213	9.98e-06	0.000104	3	4	KIF4A,KIF11,KIF2C
Pubmed	17160696	Inhibition of CDC2/Cyclin B1 in response to selenium-induced oxidative stress during spermatogenesis: potential role of Cdc25c and p21.		Pubmed	1.11e-07	0.00213	9.98e-06	0.000104	3	4	CCNB1,CDK1,CDC25C
Pubmed	30341343	TRIP13 and APC15 drive mitotic exit by turnover of interphase- and unattached kinetochore-produced MCC.		Pubmed	1.11e-07	0.00213	9.98e-06	0.000104	3	4	BUB1B,CDC20,MAD2L1
Pubmed	31278532	CDC20 and its downstream genes: potential prognosis factors of osteosarcoma.		Pubmed	1.11e-07	0.00213	9.98e-06	0.000104	3	4	CCNA2,CCNB2,CDC20
Pubmed	18592005	Loss of CHFR in human mammary epithelial cells causes genomic instability by disrupting the mitotic spindle assembly checkpoint.		Pubmed	1.11e-07	0.00213	9.98e-06	0.000104	3	4	AURKA,CDC20,MAD2L1
Pubmed	21379580	Human Cdc14B promotes progression through mitosis by dephosphorylating Cdc25 and regulating Cdk1/cyclin B activity.		Pubmed	1.11e-07	0.00213	9.98e-06	0.000104	3	4	CCNB1,CDK1,CDC25C
Pubmed	21871181	NF-Y binds to both G1- and G2-specific cyclin promoters		a possible role in linking CDK2/Cyclin A to CDK1/Cyclin B.	Pubmed	1.11e-07	0.00213	9.98e-06	0.000104	3	4	CCNA2,CCNB1,CDK1
Pubmed	27837025	Structural basis of N-Myc binding by Aurora-A and its destabilization by kinase inhibitors.		Pubmed	1.11e-07	0.00213	9.98e-06	0.000104	3	4	MYCN,AURKA,TPX2
Pubmed	18243099	Mps1 phosphorylates Borealin to control Aurora B activity and chromosome alignment.		Pubmed	1.11e-07	0.00213	9.98e-06	0.000104	3	4	BIRC5,TTK,AURKB
Pubmed	12351790	Role of Hec1 in spindle checkpoint signaling and kinetochore recruitment of Mad1/Mad2.		Pubmed	1.11e-07	0.00213	9.98e-06	0.000104	3	4	TTK,NDC80,MAD2L1
Pubmed	28096334	Role of CCT chaperonin in the disassembly of mitotic checkpoint complexes.		Pubmed	1.11e-07	0.00213	9.98e-06	0.000104	3	4	BUB1B,CDC20,MAD2L1
Pubmed	23754430	Roles of different pools of the mitotic checkpoint complex and the mechanisms of their disassembly.		Pubmed	1.11e-07	0.00213	9.98e-06	0.000104	3	4	BUB1B,CDC20,MAD2L1
Pubmed	1836978	Specific activation of cdc25 tyrosine phosphatases by B-type cyclins: evidence for multiple roles of mitotic cyclins.		Pubmed	1.11e-07	0.00213	9.98e-06	0.000104	3	4	CCNB1,CDC25A,CDC25C
Pubmed	9278511	Conservation of the Chk1 checkpoint pathway in mammals: linkage of DNA damage to Cdk regulation through Cdc25.		Pubmed	1.11e-07	0.00213	9.98e-06	0.000104	3	4	CHEK1,CDC25A,CDC25C
Pubmed	17938250	Bub1 mediates cell death in response to chromosome missegregation and acts to suppress spontaneous tumorigenesis.		Pubmed	1.11e-07	0.00213	9.98e-06	0.000104	3	4	CENPE,BUB1,BUB1B
Pubmed	24154525	Conserved molecular signatures of neurogenesis in the hippocampal subgranular zone of rodents and primates.		Pubmed	1.28e-07	0.00245	1.15e-05	0.00012	10	348	NUSAP1,MYCN,SOX11,CENPE,PCLAF,HJURP,PRC1,UNC5C,TOP2A,NPY
Pubmed	25196150	FOG-2 mediated recruitment of the NuRD complex regulates cardiomyocyte proliferation during heart development.		Pubmed	1.46e-07	0.0028	1.3e-05	0.000136	4	16	MYCN,CCNA2,CCNB1,CDK1
Pubmed	20439720	Kif26b, a kinesin family gene, regulates adhesion of the embryonic kidney mesenchyme.		Pubmed	1.46e-07	0.0028	1.3e-05	0.000136	4	16	ITGA8,EYA1,SALL1,SIX2
Pubmed	30377232	Transcription Factor 21 Is Required for Branching Morphogenesis and Regulates the Gdnf-Axis in Kidney Development.		Pubmed	1.67e-07	0.00321	1.47e-05	0.000154	5	41	EYA1,HOXA11,SALL1,HOXD11,SIX2
Pubmed	29549242	SUMO targets the APC/C to regulate transition from metaphase to anaphase.		Pubmed	1.67e-07	0.00321	1.47e-05	0.000154	5	41	UBE2C,KIF4A,TUBB2B,KIF18B,KIF2C
Pubmed	21963425	Nephron formation adopts a novel spatial topology at cessation of nephrogenesis.		Pubmed	1.91e-07	0.00366	1.66e-05	0.000174	4	17	CITED1,EYA1,TMEM100,SIX2
Pubmed	27114510	Mechanism of APC/CCDC20 activation by mitotic phosphorylation.		Pubmed	1.91e-07	0.00366	1.66e-05	0.000174	4	17	UBE2C,CCNB1,BUB1B,CDC20
Pubmed	17537792	The ECM protein nephronectin promotes kidney development via integrin alpha8beta1-mediated stimulation of Gdnf expression.		Pubmed	2.45e-07	0.00469	2.08e-05	0.000217	4	18	ITGA8,EYA1,SALL1,SIX2
Pubmed	11535616	Checkpoint inhibition of the APC/C in HeLa cells is mediated by a complex of BUBR1, BUB3, CDC20, and MAD2.		Pubmed	2.45e-07	0.00469	2.08e-05	0.000217	4	18	UBE2C,BUB1B,CDC20,MAD2L1
Pubmed	12045100	DNA replication in eukaryotic cells.		Pubmed	2.45e-07	0.00469	2.08e-05	0.000217	4	18	POLE2,MCM2,MCM10,CDC6
Pubmed	14593737	The mitotic checkpoint: a signaling pathway that allows a single unattached kinetochore to inhibit mitotic exit.		Pubmed	2.45e-07	0.00469	2.08e-05	0.000217	4	18	UBE2C,BUB1B,CDC20,MAD2L1
Pubmed	21743465	Cdk1-phosphorylated CUEDC2 promotes spindle checkpoint inactivation and chromosomal instability.		Pubmed	2.76e-07	0.0053	2.08e-05	0.000217	3	5	CDK1,CDC20,MAD2L1
Pubmed	14701726	Mitotic degradation of human thymidine kinase 1 is dependent on the anaphase-promoting complex/cyclosome-CDH1-mediated pathway.		Pubmed	2.76e-07	0.0053	2.08e-05	0.000217	3	5	CCNB1,CDC6,CDC20
Pubmed	10958988	Cell cycle G2 arrest induced by HIV-1 Vpr in fission yeast (Schizosaccharomyces pombe) is independent of cell death and early genes in the DNA damage checkpoint.		Pubmed	2.76e-07	0.0053	2.08e-05	0.000217	3	5	CCNB1,CCNB2,CDK1
Pubmed	16456547	Mammalian Emi2 mediates cytostatic arrest and transduces the signal for meiotic exit via Cdc20.		Pubmed	2.76e-07	0.0053	2.08e-05	0.000217	3	5	FBXO5,CDK1,CDC20
Pubmed	17488622	GEF-H1 modulates localized RhoA activation during cytokinesis under the control of mitotic kinases.		Pubmed	2.76e-07	0.0053	2.08e-05	0.000217	3	5	AURKA,CDK1,AURKB
Pubmed	24581499	Nuclear pores protect genome integrity by assembling a premitotic and Mad1-dependent anaphase inhibitor.		Pubmed	2.76e-07	0.0053	2.08e-05	0.000217	3	5	BUB1B,CDC20,MAD2L1
Pubmed	11559705	Involvement of the interaction between p21 and proliferating cell nuclear antigen for the maintenance of G2/M arrest after DNA damage.		Pubmed	2.76e-07	0.0053	2.08e-05	0.000217	3	5	CCNB1,CDK1,CDC25C
Pubmed	12196507	Rapid microtubule-independent dynamics of Cdc20 at kinetochores and centrosomes in mammalian cells.		Pubmed	2.76e-07	0.0053	2.08e-05	0.000217	3	5	BUB1B,CDC20,MAD2L1
Pubmed	26324890	Mode of interaction of TRIP13 AAA-ATPase with the Mad2-binding protein p31comet and with mitotic checkpoint complexes.		Pubmed	2.76e-07	0.0053	2.08e-05	0.000217	3	5	BUB1B,CDC20,MAD2L1
Pubmed	26148513	Dissecting the roles of human BUB1 in the spindle assembly checkpoint.		Pubmed	2.76e-07	0.0053	2.08e-05	0.000217	3	5	BUB1,BUB1B,CDC20
Pubmed	7666531	The human immunodeficiency virus type 1 vpr gene arrests infected T cells in the G2 + M phase of the cell cycle.		Pubmed	2.76e-07	0.0053	2.08e-05	0.000217	3	5	CCNB1,CCNB2,CDK1
Pubmed	22000412	Structure of a Blinkin-BUBR1 complex reveals an interaction crucial for kinetochore-mitotic checkpoint regulation via an unanticipated binding Site.		Pubmed	2.76e-07	0.0053	2.08e-05	0.000217	3	5	BUB1B,CDC20,MAD2L1
Pubmed	23891108	Lateral to end-on conversion of chromosome-microtubule attachment requires kinesins CENP-E and MCAK.		Pubmed	2.76e-07	0.0053	2.08e-05	0.000217	3	5	CENPE,NDC80,KIF2C
Pubmed	17443180	Anaphase initiation is regulated by antagonistic ubiquitination and deubiquitination activities.		Pubmed	2.76e-07	0.0053	2.08e-05	0.000217	3	5	UBE2C,CDC20,MAD2L1
Pubmed	7474080	Human immunodeficiency virus type 1 viral protein R (Vpr) arrests cells in the G2 phase of the cell cycle by inhibiting p34cdc2 activity.		Pubmed	2.76e-07	0.0053	2.08e-05	0.000217	3	5	CCNB1,CCNB2,CDK1
Pubmed	21300909	p31comet Promotes disassembly of the mitotic checkpoint complex in an ATP-dependent process.		Pubmed	2.76e-07	0.0053	2.08e-05	0.000217	3	5	BUB1B,CDC20,MAD2L1
Pubmed	23036704	A novel big protein TPRBK possessing 25 units of TPR motif is essential for the progress of mitosis and cytokinesis.		Pubmed	2.76e-07	0.0053	2.08e-05	0.000217	3	5	PRC1,KIF11,AURKB
Pubmed	22110403	Interplay between BRCA1 and RHAMM regulates epithelial apicobasal polarization and may influence risk of breast cancer.		Pubmed	2.76e-07	0.0053	2.08e-05	0.000217	3	5	HMMR,AURKA,TPX2
Pubmed	20531406	A human B-cell interactome identifies MYB and FOXM1 as master regulators of proliferation in germinal centers.		Pubmed	2.76e-07	0.0053	2.08e-05	0.000217	3	5	FOXM1,AURKA,BUB1B
Pubmed	26933822	Downregulation of miR-137 and miR-6500-3p promotes cell proliferation in pediatric high-grade gliomas.		Pubmed	2.76e-07	0.0053	2.08e-05	0.000217	3	5	CENPE,NCAPG,KIF14
Pubmed	9094673	Human immunodeficiency virus type 1 vpr gene induces phenotypic effects similar to those of the DNA alkylating agent, nitrogen mustard.		Pubmed	2.76e-07	0.0053	2.08e-05	0.000217	3	5	CCNB1,CCNB2,CDK1
Pubmed	17325031	Loss of Cdc20 causes a securin-dependent metaphase arrest in two-cell mouse embryos.		Pubmed	2.76e-07	0.0053	2.08e-05	0.000217	3	5	CCNB1,CDC20,MAD2L1
Pubmed	18773538	Aurora kinase-A regulates kinetochore/chromatin associated microtubule assembly in human cells.		Pubmed	2.76e-07	0.0053	2.08e-05	0.000217	3	5	AURKA,TPX2,AURKB
Pubmed	16159883	Depletion of Chk1 leads to premature activation of Cdc2-cyclin B and mitotic catastrophe.		Pubmed	2.76e-07	0.0053	2.08e-05	0.000217	3	5	CHEK1,CCNB1,CDK1
Pubmed	11878934	Hypophosphorylation of poly(A) polymerase and increased polyadenylation activity are associated with human immunodeficiency virus type 1 Vpr expression.		Pubmed	2.76e-07	0.0053	2.08e-05	0.000217	3	5	CCNB1,CCNB2,CDK1
Pubmed	18640244	Identification of genes that restrict astrocyte differentiation of midgestational neural precursor cells.		Pubmed	2.76e-07	0.0053	2.08e-05	0.000217	3	5	MYCN,SOX11,HMGA2
Pubmed	23091007	Structural analysis of human Cdc20 supports multisite degron recognition by APC/C.		Pubmed	2.76e-07	0.0053	2.08e-05	0.000217	3	5	CCNB1,BUB1B,CDC20
Pubmed	31118282	Role of Polo-like kinase 1 in the regulation of the action of p31		Pubmed	2.76e-07	0.0053	2.08e-05	0.000217	3	5	BUB1,CDC20,MAD2L1
Pubmed	20512932	DNA damage during mitosis invokes a JNK-mediated stress response that leads to cell death.		Pubmed	2.76e-07	0.0053	2.08e-05	0.000217	3	5	BUB1B,CDC20,MAD2L1
Pubmed	31588029	The G2-to-M Transition Is Ensured by a Dual Mechanism that Protects Cyclin B from Degradation by Cdc20-Activated APC/C.		Pubmed	2.76e-07	0.0053	2.08e-05	0.000217	3	5	CCNB1,CDC20,MAD2L1
Pubmed	23383273	VCP phosphorylation-dependent interaction partners prevent apoptosis in Helicobacter pylori-infected gastric epithelial cells.		Pubmed	2.77e-07	0.00531	2.08e-05	0.000217	9	288	CHEK1,NCAPH,TTK,CCNB1,CEP55,NEK2,FANCI,CDK1,HELLS
Pubmed	21858105	Hox10 genes function in kidney development in the differentiation and integration of the cortical stroma.		Pubmed	3.09e-07	0.00593	2.32e-05	0.000242	4	19	EYA1,HOXA11,HOXD11,SIX2
Pubmed	20843830	The planar cell polarity gene Vangl2 is required for mammalian kidney-branching morphogenesis and glomerular maturation.		Pubmed	3.37e-07	0.00648	2.51e-05	0.000262	6	89	ITGA8,EYA1,HOXA11,SALL1,HOXD11,SIX2
Pubmed	17274640	A limited screen for protein interactions reveals new roles for protein phosphatase 1 in cell cycle control and apoptosis.		Pubmed	3.38e-07	0.00648	2.51e-05	0.000262	5	47	BIRC5,CCNB1,NEK2,CDK1,AURKB
Pubmed	25921289	Temporal proteomics of NGF-TrkA signaling identifies an inhibitory role for the E3 ligase Cbl-b in neuroblastoma cell differentiation.		Pubmed	3.6e-07	0.0069	2.67e-05	0.000278	21	1922	CLGN,DLGAP5,KIF4A,MCM2,TUBB2B,MCM10,RRM2,NCAPH,TTK,NCAPG,KIF15,LMNB1,NDC80,FANCI,UNC5C,KIF14,ELAVL4,CDK1,KIF11,KIF2C,HELLS
Pubmed	25609649	Proteomic analyses reveal distinct chromatin-associated and soluble transcription factor complexes.		Pubmed	3.92e-07	0.00753	2.9e-05	0.000302	14	857	FOXM1,MYCN,KIF4A,DEPDC1,PRC1,NCAPH,NCAPG,HMGA2,SALL1,TPX2,CDC25A,TOP2A,KIF2C,HELLS
Pubmed	30833792	A protein-interaction network of interferon-stimulated genes extends the innate immune system landscape.		Pubmed	4.03e-07	0.00774	2.96e-05	0.000309	18	1440	KIF23,CLGN,PCLAF,MCM2,TUBB2B,ARHGAP11A,NCAPH,CCNA2,CCNB1,NCAPG,CCNE2,FANCI,BUB1B,KIF14,CDK1,CDC20,TOP2A,HELLS
Pubmed	25168025	Nonmuscle Myosin II Regulates the Morphogenesis of Metanephric Mesenchyme-Derived Immature Nephrons.		Pubmed	4.75e-07	0.00911	3.48e-05	0.000363	4	21	ITGA8,CITED1,SALL1,SIX2
Pubmed	11136719	Chromosome condensation by a human condensin complex in Xenopus egg extracts.		Pubmed	5.51e-07	0.0106	3.74e-05	0.00039	3	6	NCAPH,NCAPG,CDK1
Pubmed	18635963	Cyclin A-CDK activity during G1 phase impairs MCM chromatin loading and inhibits DNA synthesis in mammalian cells.		Pubmed	5.51e-07	0.0106	3.74e-05	0.00039	3	6	CCNA2,CDK1,CDC6
Pubmed	8463339	G2 delay induced by nitrogen mustard in human cells affects cyclin A/cdk2 and cyclin B1/cdc2-kinase complexes differently.		Pubmed	5.51e-07	0.0106	3.74e-05	0.00039	3	6	CCNA2,CCNB1,CDK1
Pubmed	11113184	Reciprocal activation by cyclin-dependent kinases 2 and 7 is directed by substrate specificity determinants outside the T loop.		Pubmed	5.51e-07	0.0106	3.74e-05	0.00039	3	6	CCNA2,CCNB1,CDK1
Pubmed	25505175	The Cdc20-binding Phe box of the spindle checkpoint protein BubR1 maintains the mitotic checkpoint complex during mitosis.		Pubmed	5.51e-07	0.0106	3.74e-05	0.00039	3	6	CCNB1,BUB1B,CDC20
Pubmed	25830658	Assessing associations between the AURKA-HMMR-TPX2-TUBG1 functional module and breast cancer risk in BRCA1/2 mutation carriers.		Pubmed	5.51e-07	0.0106	3.74e-05	0.00039	3	6	HMMR,AURKA,TPX2
Pubmed	21525009	BUBR1 and closed MAD2 (C-MAD2) interact directly to assemble a functional mitotic checkpoint complex.		Pubmed	5.51e-07	0.0106	3.74e-05	0.00039	3	6	BUB1B,CDC20,MAD2L1
Pubmed	21335556	Orderly inactivation of the key checkpoint protein mitotic arrest deficient 2 (MAD2) during mitotic progression.		Pubmed	5.51e-07	0.0106	3.74e-05	0.00039	3	6	BUB1B,CDC20,MAD2L1
Pubmed	14718566	TOGp, the human homolog of XMAP215/Dis1, is required for centrosome integrity, spindle pole organization, and bipolar spindle assembly.		Pubmed	5.51e-07	0.0106	3.74e-05	0.00039	3	6	TPX2,KIF11,KIF2C
Pubmed	24623419	Identification of cellular proteins interacting with the retroviral restriction factor SAMHD1.		Pubmed	5.51e-07	0.0106	3.74e-05	0.00039	3	6	CCNA2,CCNB1,CDK1
Pubmed	19117984	Functional interaction between BubR1 and securin in an anaphase-promoting complex/cyclosomeCdc20-independent manner.		Pubmed	5.51e-07	0.0106	3.74e-05	0.00039	3	6	AURKA,BUB1B,CDC20
Pubmed	21772247	Probing the in vivo function of Mad1:C-Mad2 in the spindle assembly checkpoint.		Pubmed	5.51e-07	0.0106	3.74e-05	0.00039	3	6	BUB1B,CDC20,MAD2L1
Pubmed	28410192	Pellino 1 inactivates mitotic spindle checkpoint by targeting BubR1 for ubiquitinational degradation.		Pubmed	5.51e-07	0.0106	3.74e-05	0.00039	3	6	BUB1B,CDC20,MAD2L1
Pubmed	23708605	Electron microscopy structure of human APC/C(CDH1)-EMI1 reveals multimodal mechanism of E3 ligase shutdown.		Pubmed	5.51e-07	0.0106	3.74e-05	0.00039	3	6	UBE2C,CCNB1,FBXO5
Pubmed	31822694	Myc stimulates cell cycle progression through the activation of Cdk1 and phosphorylation of p27.		Pubmed	5.51e-07	0.0106	3.74e-05	0.00039	3	6	CCNA2,CCNB1,CDK1
Pubmed	8397207	Characterization of the in vitro reconstituted cyclin A or B1-dependent cdk2 and cdc2 kinase activities.		Pubmed	5.51e-07	0.0106	3.74e-05	0.00039	3	6	CCNA2,CCNB1,CDK1
Pubmed	23479742	CUL4B promotes replication licensing by up-regulating the CDK2-CDC6 cascade.		Pubmed	5.51e-07	0.0106	3.74e-05	0.00039	3	6	CCNE2,CDK1,CDC6
Pubmed	11084331	Survivin and the inner centromere protein INCENP show similar cell-cycle localization and gene knockout phenotype.		Pubmed	5.51e-07	0.0106	3.74e-05	0.00039	3	6	CENPE,CENPF,BIRC5
Pubmed	20956543	Human Cdc14A phosphatase modulates the G2/M transition through Cdc25A and Cdc25B.		Pubmed	5.51e-07	0.0106	3.74e-05	0.00039	3	6	CCNB1,CDK1,CDC25A
Pubmed	19822658	Cyclin A2-cyclin-dependent kinase 2 cooperates with the PLK1-SCFbeta-TrCP1-EMI1-anaphase-promoting complex/cyclosome axis to promote genome reduplication in the absence of mitosis.		Pubmed	5.51e-07	0.0106	3.74e-05	0.00039	3	6	CCNA2,FBXO5,CDK1
Pubmed	16760428	Phosphorylation- and polo-box-dependent binding of Plk1 to Bub1 is required for the kinetochore localization of Plk1.		Pubmed	5.51e-07	0.0106	3.74e-05	0.00039	3	6	BUB1,BUB1B,CDK1
Pubmed	19946888	Defining the membrane proteome of NK cells.		Pubmed	5.75e-07	0.011	3.86e-05	0.000403	16	1168	CENPE,KIF4A,HMMR,NCAPH,TTK,CEP55,NCAPG,KIF15,LMNB1,NDC80,FANCI,BUB1,KIF14,CDK1,KIF11,KIF2C
Pubmed	15707391	DNA-dependent phosphorylation of Chk1 and Claspin in a human cell-free system.		Pubmed	5.79e-07	0.0111	3.86e-05	0.000403	4	22	MCM2,CHEK1,MCM10,CDC6
Pubmed	25641696	Fibroblast growth factor receptor-Frs2? signaling is critical for nephron progenitors.		Pubmed	5.79e-07	0.0111	3.86e-05	0.000403	4	22	CITED1,EYA1,MEOX1,SIX2
Pubmed	20301753	Esophageal Atresia/Tracheoesophageal Fistula Overview		Pubmed	5.79e-07	0.0111	3.86e-05	0.000403	4	22	MYCN,BRIP1,CHD7,FANCI
Pubmed	15843407	T-box genes coordinate regional rates of proliferation and regional specification during cardiogenesis.		Pubmed	5.79e-07	0.0111	3.86e-05	0.000403	4	22	MYCN,CITED1,CCNA2,SMPX
Pubmed	31142573	Von Hippel-Lindau Acts as a Metabolic Switch Controlling Nephron Progenitor Differentiation.		Pubmed	6.99e-07	0.0134	4.61e-05	0.000482	4	23	CITED1,EYA1,SALL1,SIX2
Pubmed	24301385	The APC/C cofactor Cdh1 prevents replicative stress and p53-dependent cell death in neural progenitors.		Pubmed	6.99e-07	0.0134	4.61e-05	0.000482	4	23	CCNB1,AURKA,TPX2,AURKB
Pubmed	25043184	Sox4 links tumor suppression to accelerated aging in mice by modulating stem cell activation.		Pubmed	6.99e-07	0.0134	4.61e-05	0.000482	4	23	SOX11,BACH2,CDC20,TOP2A
Pubmed	22623531	Functional genomics identifies therapeutic targets for MYC-driven cancer.		Pubmed	8.02e-07	0.0154	5.27e-05	0.00055	6	103	MYCN,KIF18A,PBK,PRC1,NEK2,FBXO5
Pubmed	24952961	A high-resolution spatiotemporal atlas of gene expression of the developing mouse brain.		Pubmed	8.44e-07	0.0162	5.53e-05	0.000577	20	1851	COL2A1,FOXM1,B3GALT2,MYCN,SOX11,COL13A1,PEG10,BACH2,CITED1,CHRNA5,MEOX1,HOXA11,CDK5R1,LYPD1,HMGA2,NRXN1,UNC5C,FZD10,CDH7,NPY
Pubmed	27609421	TNIP2 is a Hub Protein in the NF-?B Network with Both Protein and RNA Mediated Interactions.		Pubmed	9.32e-07	0.0179	5.85e-05	0.00061	14	922	MCM2,TUBB2B,MCM10,EZH2,NCAPH,CCNB1,KIF20A,AURKA,CDK5R1,LMNB1,HOXD11,CDK1,CDC20,AURKB
Pubmed	9053846	The cyclin box and C-terminus of cyclins A and E specify CDK activation and substrate specificity.		Pubmed	9.63e-07	0.0185	5.85e-05	0.00061	3	7	CCNA2,CCNB1,CDK1
Pubmed	27939943	The Mitotic Checkpoint Complex Requires an Evolutionary Conserved Cassette to Bind and Inhibit Active APC/C.		Pubmed	9.63e-07	0.0185	5.85e-05	0.00061	3	7	BUB1B,CDC20,MAD2L1
Pubmed	23643811	APC/C(Cdh1)-dependent degradation of Cdc20 requires a phosphorylation on CRY-box by Polo-like kinase-1 during somatic cell cycle.		Pubmed	9.63e-07	0.0185	5.85e-05	0.00061	3	7	BUB1B,CDC20,MAD2L1
Pubmed	25012665	Thyroid hormone receptor interacting protein 13 (TRIP13) AAA-ATPase is a novel mitotic checkpoint-silencing protein.		Pubmed	9.63e-07	0.0185	5.85e-05	0.00061	3	7	BUB1B,CDC20,MAD2L1
Pubmed	15735702	BRCA1-mediated G2/M cell cycle arrest requires ERK1/2 kinase activation.		Pubmed	9.63e-07	0.0185	5.85e-05	0.00061	3	7	CHEK1,CDK1,CDC25C
Pubmed	9560267	HIV transcriptional activation by the accessory protein, VPR, is mediated by the p300 co-activator.		Pubmed	9.63e-07	0.0185	5.85e-05	0.00061	3	7	CCNB1,CCNB2,CDK1
Pubmed	14993212	Cdt1 phosphorylation by cyclin A-dependent kinases negatively regulates its function without affecting geminin binding.		Pubmed	9.63e-07	0.0185	5.85e-05	0.00061	3	7	CCNA2,CCNB1,CDK1
Pubmed	27542221	Acetylation of FOXM1 is essential for its transactivation and tumor growth stimulation.		Pubmed	9.63e-07	0.0185	5.85e-05	0.00061	3	7	FOXM1,CCNB1,CDK1
Pubmed	11691994	Dynamic disruptions in nuclear envelope architecture and integrity induced by HIV-1 Vpr.		Pubmed	9.63e-07	0.0185	5.85e-05	0.00061	3	7	CCNB1,LMNB1,CDC25C
Pubmed	22340593	Aurora kinase-A inactivates DNA damage-induced apoptosis and spindle assembly checkpoint response functions of p73.		Pubmed	9.63e-07	0.0185	5.85e-05	0.00061	3	7	AURKA,CDC20,MAD2L1
Pubmed	22100920	p31comet-mediated extraction of Mad2 from the MCC promotes efficient mitotic exit.		Pubmed	9.63e-07	0.0185	5.85e-05	0.00061	3	7	BUB1B,CDC20,MAD2L1
Pubmed	18201571	Phosphoregulation of MgcRacGAP in mitosis involves Aurora B and Cdk1 protein kinases and the PP2A phosphatase.		Pubmed	9.63e-07	0.0185	5.85e-05	0.00061	3	7	KIF23,CDK1,AURKB
Pubmed	23060211	Identification of candidate downstream targets of TGF? signaling during palate development by genome-wide transcript profiling.		Pubmed	9.63e-07	0.0185	5.85e-05	0.00061	3	7	BIRC5,CCNA2,CCNB1
Pubmed	20929775	Two histone marks establish the inner centromere and chromosome bi-orientation.		Pubmed	9.63e-07	0.0185	5.85e-05	0.00061	3	7	BIRC5,BUB1,AURKB
Pubmed	27728805	N-Myc Induces an EZH2-Mediated Transcriptional Program Driving Neuroendocrine Prostate Cancer.		Pubmed	9.63e-07	0.0185	5.85e-05	0.00061	3	7	MYCN,EZH2,AURKA
Pubmed	32665241	Loss of U11 small nuclear RNA in the developing mouse limb results in micromelia.		Pubmed	9.63e-07	0.0185	5.85e-05	0.00061	3	7	HOXA11,SALL1,AURKB
Pubmed	19160489	The adaptor protein of the anaphase promoting complex Cdh1 is essential in maintaining replicative lifespan and in learning and memory.		Pubmed	9.63e-07	0.0185	5.85e-05	0.00061	3	7	CCNB1,CDC20,AURKB
Pubmed	20739936	Phosphorylation of the CPC by Cdk1 promotes chromosome bi-orientation.		Pubmed	9.63e-07	0.0185	5.85e-05	0.00061	3	7	BIRC5,CDK1,AURKB
Pubmed	9926943	Functional association of TGF-beta receptor II with cyclin B.		Pubmed	9.63e-07	0.0185	5.85e-05	0.00061	3	7	CCNB1,CCNB2,CDK1
Pubmed	25383541	The mitotic checkpoint complex binds a second CDC20 to inhibit active APC/C.		Pubmed	9.63e-07	0.0185	5.85e-05	0.00061	3	7	BUB1B,CDC20,MAD2L1
Pubmed	7624053	Expression of Rb, E2F1, cdc2, and D, and B cyclins in developing spinal cord.		Pubmed	9.63e-07	0.0185	5.85e-05	0.00061	3	7	CCNB1,CCNB2,CDK1
Pubmed	19592082	Cyclin A is redundant in fibroblasts but essential in hematopoietic and embryonic stem cells.		Pubmed	9.63e-07	0.0185	5.85e-05	0.00061	3	7	CCNA2,CCNE2,CDK1
Pubmed	15782160	Mapping DNA-protein interactions in large genomes by sequence tag analysis of genomic enrichment.		Pubmed	9.94e-07	0.0191	5.96e-05	0.000623	4	25	PBK,ARHGAP11A,CCNA2,CDK1
Pubmed	24661562	Hmga2 is required for canonical WNT signaling during lung development.		Pubmed	9.94e-07	0.0191	5.96e-05	0.000623	4	25	MYCN,HMGA2,LMNB1,CCNE2
Pubmed	9275178	Identification and classification of 16 new kinesin superfamily (KIF) proteins in mouse genome.		Pubmed	9.94e-07	0.0191	5.96e-05	0.000623	4	25	CENPE,KIF15,KIF14,KIF11
Pubmed	24706806	Acentriolar mitosis activates a p53-dependent apoptosis pathway in the mouse embryo.		Pubmed	9.94e-07	0.0191	5.96e-05	0.000623	4	25	CCNB1,AURKA,BUB1B,MAD2L1
Pubmed	17081983	Global, in vivo, and site-specific phosphorylation dynamics in signaling networks.		Pubmed	1.12e-06	0.0214	6.67e-05	0.000697	18	1546	KIF23,CLGN,CENPE,CENPF,DLGAP5,PBK,KIF4A,MCM2,EZH2,CEP55,KIF20A,NCAPG,ADGRG2,TPX2,ASPM,KIF14,TOP2A,KIF2C
Pubmed	11531413	HIV-1 Vpr induces cell cycle G2 arrest in fission yeast (Schizosaccharomyces pombe) through a pathway involving regulatory and catalytic subunits of PP2A and acting on both Wee1 and Cdc25.		Pubmed	1.37e-06	0.0264	8.18e-05	0.000854	4	27	CCNB1,CCNB2,CDK1,CDC25C
Pubmed	14602875	Identification of the substrates and interaction proteins of aurora kinases from a protein-protein interaction model.		Pubmed	1.54e-06	0.0295	8.88e-05	0.000927	3	8	AURKA,NDC80,AURKB
Pubmed	16007079	Cdc2-cyclin E complexes regulate the G1/S phase transition.		Pubmed	1.54e-06	0.0295	8.88e-05	0.000927	3	8	CCNA2,CCNB1,CDK1
Pubmed	29424068	Mutations at multiple CDK phosphorylation consensus sites on Cdt2 increase the affinity of CRL4		Pubmed	1.54e-06	0.0295	8.88e-05	0.000927	3	8	DTL,CCNA2,CDK1
Pubmed	21937719	Defining pathways of spindle checkpoint silencing: functional redundancy between Cdc20 ubiquitination and p31(comet).		Pubmed	1.54e-06	0.0295	8.88e-05	0.000927	3	8	UBE2C,BUB1B,CDC20
Pubmed	18445273	14-3-3 theta binding to cell cycle regulatory factors is enhanced by HIV-1 Vpr.		Pubmed	1.54e-06	0.0295	8.88e-05	0.000927	3	8	CCNB1,CDK1,CDC25C
Pubmed	15388328	WD repeat-containing mitotic checkpoint proteins act as transcriptional repressors during interphase.		Pubmed	1.54e-06	0.0295	8.88e-05	0.000927	3	8	BUB1,BUB1B,CDC20
Pubmed	20978074	Hox11 genes establish synovial joint organization and phylogenetic characteristics in developing mouse zeugopod skeletal elements.		Pubmed	1.54e-06	0.0295	8.88e-05	0.000927	3	8	COL2A1,HOXA11,HOXD11
Pubmed	20080579	UBE2S drives elongation of K11-linked ubiquitin chains by the anaphase-promoting complex.		Pubmed	1.54e-06	0.0295	8.88e-05	0.000927	3	8	UBE2C,CCNB1,CDC20
Pubmed	15024056	Forkhead box M1B transcriptional activity requires binding of Cdk-cyclin complexes for phosphorylation-dependent recruitment of p300/CBP coactivators.		Pubmed	1.54e-06	0.0295	8.88e-05	0.000927	3	8	FOXM1,CCNB1,CDK1
Pubmed	26960431	Interphase APC/C-Cdc20 inhibition by cyclin A2-Cdk2 ensures efficient mitotic entry.		Pubmed	1.54e-06	0.0295	8.88e-05	0.000927	3	8	CCNA2,BUB1B,CDC20
Pubmed	20309963	Novel interactors and a role for supervillin in early cytokinesis.		Pubmed	1.6e-06	0.0307	9.21e-05	0.000961	4	28	CENPF,HMMR,BUB1,KIF14
Pubmed	24440154	Mdm2 is required for maintenance of the nephrogenic niche.		Pubmed	1.85e-06	0.0355	0.000106	0.00111	4	29	CITED1,EYA1,SALL1,SIX2
Pubmed	21862448	Gene expression analysis of the embryonic subplate.		Pubmed	1.93e-06	0.0371	0.000111	0.00116	7	188	PCLAF,BIRC5,ARHGAP11A,NCAPG,UNC5C,TOP2A,KIF11
Pubmed	19477924	Cdh1 regulates cell cycle through modulating the claspin/Chk1 and the Rb/E2F1 pathways.		Pubmed	2.3e-06	0.0441	0.000127	0.00133	3	9	CHEK1,CDC20,CDC25A
Pubmed	24158819	HIV-1 accessory proteins: VpR.		Pubmed	2.3e-06	0.0441	0.000127	0.00133	3	9	CHEK1,CDK1,CDC25C
Pubmed	14668414	Multiple roles of Hoxa11 and Hoxd11 in the formation of the mammalian forelimb zeugopod.		Pubmed	2.3e-06	0.0441	0.000127	0.00133	3	9	COL2A1,HOXA11,HOXD11
Pubmed	25049228	The interaction between checkpoint kinase 1 (Chk1) and the minichromosome maintenance (MCM) complex is required for DNA damage-induced Chk1 phosphorylation.		Pubmed	2.3e-06	0.0441	0.000127	0.00133	3	9	MCM2,CHEK1,GINS1
Pubmed	31221640	Bone morphology is regulated modularly by global and regional genetic programs.		Pubmed	2.3e-06	0.0441	0.000127	0.00133	3	9	COL2A1,HOXA11,HOXD11
Pubmed	7799941	Effects of phosphorylation by CAK on cyclin binding by CDC2 and CDK2.		Pubmed	2.3e-06	0.0441	0.000127	0.00133	3	9	CCNB1,CCNE2,CDK1
Pubmed	15159393	Cyclin A2 mediates cardiomyocyte mitosis in the postmitotic myocardium.		Pubmed	2.3e-06	0.0441	0.000127	0.00133	3	9	CCNA2,CCNB1,CDK1
Pubmed	18676373	Hurp deficiency in mice leads to female infertility caused by an implantation defect.		Pubmed	2.3e-06	0.0441	0.000127	0.00133	3	9	DLGAP5,BUB1B,MAD2L1
Pubmed	25825779	RING E3 mechanism for ubiquitin ligation to a disordered substrate visualized for human anaphase-promoting complex.		Pubmed	2.3e-06	0.0441	0.000127	0.00133	3	9	UBE2C,CCNB1,CDC20
Pubmed	21596315	Deubiquitinase USP37 is activated by CDK2 to antagonize APC(CDH1) and promote S phase entry.		Pubmed	2.3e-06	0.0441	0.000127	0.00133	3	9	CCNA2,CCNB1,CDC20
Pubmed	12783782	Six1 is required for the early organogenesis of mammalian kidney.	1	Pubmed	2.3e-06	0.0441	0.000127	0.00133	3	9	EYA1,SALL1,SIX2
Pubmed	12676926	Cyclin-dependent kinases phosphorylate p73 at threonine 86 in a cell cycle-dependent manner and negatively regulate p73.		Pubmed	2.3e-06	0.0441	0.000127	0.00133	3	9	CCNA2,CCNB1,CDK1
Pubmed	19454010	In vitro nuclear interactome of the HIV-1 Tat protein.		Pubmed	2.46e-06	0.0473	0.000136	0.00142	7	195	NCAPH,NCAPG,HMGA2,LMNB1,CCNB2,CDK1,TOP2A
Pubmed	26831064	CHK2-BRCA1 tumor-suppressor axis restrains oncogenic Aurora-A kinase to ensure proper mitotic microtubule assembly.		Pubmed	3.04e-06	0.0584	0.000167	0.00175	10	494	KIF23,BRIP1,CENPF,MCM2,HMMR,KIF20A,AURKA,LMNB1,TPX2,KIF11
Pubmed	18159948	Distinct roles and regulations for HoxD genes in metanephric kidney development.		Pubmed	3.16e-06	0.0606	0.000172	0.0018	4	33	ITGA8,HOXA11,HOXD11,SIX2
Pubmed	9244350	BRCA1 proteins are transported to the nucleus in the absence of serum and splice variants BRCA1a, BRCA1b are tyrosine phosphoproteins that associate with E2F, cyclins and cyclin dependent kinases.		Pubmed	3.28e-06	0.0629	0.000172	0.0018	3	10	CCNA2,CCNB1,CDK1
Pubmed	21705323	Studies on human DNA polymerase epsilon and GINS complex and their role in DNA replication.		Pubmed	3.28e-06	0.0629	0.000172	0.0018	3	10	POLE2,GINS1,GINS2
Pubmed	11799067	E2F integrates cell cycle progression with DNA repair, replication, and G(2)/M checkpoints.		Pubmed	3.28e-06	0.0629	0.000172	0.0018	3	10	CHEK1,TOP2A,MAD2L1
Pubmed	16442091	Role of fibroblast growth factor receptors 1 and 2 in the metanephric mesenchyme.		Pubmed	3.28e-06	0.0629	0.000172	0.0018	3	10	EYA1,SALL1,SIX2
Pubmed	21554500	Mitotic kinase Aurora-B is regulated by SUMO-2/3 conjugation/deconjugation during mitosis.		Pubmed	3.28e-06	0.0629	0.000172	0.0018	3	10	BIRC5,AURKA,AURKB
Pubmed	18997788	The APC/C maintains the spindle assembly checkpoint by targeting Cdc20 for destruction.		Pubmed	3.28e-06	0.0629	0.000172	0.0018	3	10	BUB1B,CDC20,MAD2L1
Pubmed	22014574	SIRT2 maintains genome integrity and suppresses tumorigenesis through regulating APC/C activity.		Pubmed	3.28e-06	0.0629	0.000172	0.0018	3	10	CCNB1,AURKA,CDC20
Pubmed	22371557	Aurora B controls kinetochore-microtubule attachments by inhibiting Ska complex-KMN network interaction.		Pubmed	3.28e-06	0.0629	0.000172	0.0018	3	10	SPC25,NDC80,AURKB
Pubmed	21795393	Condensins I and II are essential for construction of bivalent chromosomes in mouse oocytes.		Pubmed	3.28e-06	0.0629	0.000172	0.0018	3	10	NCAPH,NCAPG,TOP2A
Pubmed	19483727	Degradation of cyclin A is regulated by acetylation.		Pubmed	3.28e-06	0.0629	0.000172	0.0018	3	10	CCNA2,CDK1,CDC20
Pubmed	24886500	G1 checkpoint establishment in vivo during embryonic liver development.		Pubmed	3.28e-06	0.0629	0.000172	0.0018	3	10	CCNA2,CCNB1,CDK1
Pubmed	24464857	Stable MCC binding to the APC/C is required for a functional spindle assembly checkpoint.		Pubmed	3.28e-06	0.0629	0.000172	0.0018	3	10	BUB1B,CDC20,MAD2L1
Pubmed	24500693	Dicer function is required in the metanephric mesenchyme for early kidney development.		Pubmed	3.28e-06	0.0629	0.000172	0.0018	3	10	CITED1,SALL1,SIX2
Pubmed	20863901	Expression of cyclin E in postmitotic neurons during development and in the adult mouse brain.		Pubmed	3.28e-06	0.0629	0.000172	0.0018	3	10	CCNA2,CDK5R1,CCNE2
Pubmed	21199919	Protein interaction domain mapping of human kinetochore protein Blinkin reveals a consensus motif for binding of spindle assembly checkpoint proteins Bub1 and BubR1.		Pubmed	3.28e-06	0.0629	0.000172	0.0018	3	10	NDC80,BUB1,BUB1B
Pubmed	31598710	ZAR1 and ZAR2 are required for oocyte meiotic maturation by regulating the maternal transcriptome and mRNA translational activation.		Pubmed	3.57e-06	0.0685	0.000187	0.00195	4	34	BIRC5,CCNB1,TPX2,TOP2A
Pubmed	27820600	Direct reprogramming of fibroblasts into renal tubular epithelial cells by defined transcription factors.		Pubmed	3.57e-06	0.0685	0.000187	0.00195	4	34	EYA1,SALL1,HOXD11,SIX2
Pubmed	22158041	A p27Kip1 mutant that does not inhibit CDK activity promotes centrosome amplification and micronucleation.		Pubmed	4.5e-06	0.0863	0.00023	0.0024	3	11	CCNA2,CCNB1,CDK1
Pubmed	25161877	The zinc-binding region (ZBR) fragment of Emi2 can inhibit APC/C by targeting its association with the coactivator Cdc20 and UBE2C-mediated ubiquitylation.		Pubmed	4.5e-06	0.0863	0.00023	0.0024	3	11	UBE2C,CCNB1,CDC20
Pubmed	26919979	Conditional mutation of Smc5 in mouse embryonic stem cells perturbs condensin localization and mitotic progression.		Pubmed	4.5e-06	0.0863	0.00023	0.0024	3	11	TOP2A,MAD2L1,AURKB
Pubmed	15147269	The centrosomal protein Lats2 is a phosphorylation target of Aurora-A kinase.		Pubmed	4.5e-06	0.0863	0.00023	0.0024	3	11	AURKA,NEK2,CDK1
Pubmed	8662825	Cyclin-dependent kinases are inactivated by a combination of p21 and Thr-14/Tyr-15 phosphorylation after UV-induced DNA damage.		Pubmed	4.5e-06	0.0863	0.00023	0.0024	3	11	CCNA2,CCNB1,CDK1
Pubmed	31856871	MYCN and PRC1 cooperatively repress docosahexaenoic acid synthesis in neuroblastoma via ELOVL2.		Pubmed	4.5e-06	0.0863	0.00023	0.0024	3	11	MYCN,PRC1,ELOVL2
Pubmed	15050687	Proliferation inhibition of astrocytes, neurons, and non-glial cells by intracellularly expressed human immunodeficiency virus type 1 (HIV-1) Tat protein.		Pubmed	4.5e-06	0.0863	0.00023	0.0024	3	11	CCNA2,CDK1,CDC6
Pubmed	16319116	Identification of multipotent progenitors in the embryonic mouse kidney by a novel colony-forming assay.		Pubmed	4.51e-06	0.0866	0.00023	0.0024	4	36	ITGA8,EYA1,HOXA11,SALL1
Pubmed	11555636	Large-scale identification of mammalian proteins localized to nuclear sub-compartments.		Pubmed	4.51e-06	0.0866	0.00023	0.0024	4	36	CHEK1,HMGA2,CDK1,HELLS
Pubmed	19501082	Analysis of early nephron patterning reveals a role for distal RV proliferation in fusion to the ureteric tip via a cap mesenchyme-derived connecting segment.		Pubmed	4.88e-06	0.0937	0.000237	0.00247	5	80	LMNB1,GREB1,TMEM100,SIX2,NPY
Pubmed	20228808	Ubiquitin hydrolase Dub3 promotes oncogenic transformation by stabilizing Cdc25A.		Pubmed	5.05e-06	0.0969	0.000237	0.00247	4	37	CCNB1,CDK1,CDC25A,CDC25C
Pubmed	7671812	Isolation of novel tissue-specific genes from cDNA libraries representing the individual tissue constituents of the gastrulating mouse embryo.		Pubmed	5.26e-06	0.101	0.000237	0.00247	9	412	NUSAP1,RRM2,TTK,SALL1,BUB1,GREB1,TOP2A,MAD2L1,AURKB
Pubmed	18329369	Final stages of cytokinesis and midbody ring formation are controlled by BRUCE.		Pubmed	5.98e-06	0.115	0.000237	0.00247	3	12	KIF23,BIRC5,CDK1
Pubmed	22617334	Phospho-Bcl-x(L)(Ser62) plays a key role at DNA damage-induced G(2) checkpoint.		Pubmed	5.98e-06	0.115	0.000237	0.00247	3	12	CHEK1,AURKA,CDK1
Pubmed	25458011	Eya1 interacts with Six2 and Myc to regulate expansion of the nephron progenitor pool during nephrogenesis.		Pubmed	5.98e-06	0.115	0.000237	0.00247	3	12	MYCN,EYA1,SIX2
Pubmed	15707957	Functional interaction of Puralpha with the Cdk2 moiety of cyclin A/Cdk2.		Pubmed	5.98e-06	0.115	0.000237	0.00247	3	12	CCNA2,CCNB1,CDK1
Pubmed	21926987	APC15 drives the turnover of MCC-CDC20 to make the spindle assembly checkpoint responsive to kinetochore attachment.		Pubmed	5.98e-06	0.115	0.000237	0.00247	3	12	BUB1B,CDC20,MAD2L1
Pubmed	15931389	Microarray analysis identifies a death-from-cancer signature predicting therapy failure in patients with multiple types of cancer.		Pubmed	5.98e-06	0.115	0.000237	0.00247	3	12	CCNB1,NDC80,BUB1
Pubmed	28993399	Myc cooperates with ?-catenin to drive gene expression in nephron progenitor cells.		Pubmed	5.98e-06	0.115	0.000237	0.00247	3	12	MYCN,CITED1,SIX2
Pubmed	24598167	Osr1 acts downstream of and interacts synergistically with Six2 to maintain nephron progenitor cells during kidney organogenesis.		Pubmed	5.98e-06	0.115	0.000237	0.00247	3	12	CITED1,EYA1,SIX2
Pubmed	8552401	Regulation of cyclin and cyclin-dependent kinase gene expression during lens differentiation requires the retinoblastoma protein.		Pubmed	5.98e-06	0.115	0.000237	0.00247	3	12	CCNA2,CCNB1,CDK1
Pubmed	22916278	Hoxa11 and Hoxd11 regulate chondrocyte differentiation upstream of Runx2 and Shox2 in mice.		Pubmed	5.98e-06	0.115	0.000237	0.00247	3	12	COL2A1,HOXA11,HOXD11
Pubmed	21148318	Cyclin-dependent kinase-mediated phosphorylation of RBP1 and pRb promotes their dissociation to mediate release of the SAP30?mSin3?HDAC transcriptional repressor complex.		Pubmed	5.98e-06	0.115	0.000237	0.00247	3	12	CCNA2,CCNB1,CDK1
Pubmed	20800603	Investigation of genetic susceptibility factors for human longevity - a targeted nonsynonymous SNP study.		Pubmed	6.02e-06	0.115	0.000237	0.00247	8	315	FOXM1,BIRC5,CHD7,CCNA2,FBXO5,CNTN5,CDC6,TOP2A
Pubmed	30566624	Impact of Fgf10 deficiency on pulmonary vasculature formation in a mouse model of bronchopulmonary dysplasia.		Pubmed	6.26e-06	0.12	0.000237	0.00247	4	39	MYCN,CCNA2,CCNB1,CCNB2
Pubmed	17276355	M?nage-?-trois 1 is critical for the transcriptional function of PPARgamma coactivator 1.		Pubmed	7.67e-06	0.147	0.000237	0.00247	4	41	CCNA2,CCNB1,CCNE2,CDK1
Pubmed	24173802	The vertebrate-specific Kinesin-6, Kif20b, is required for normal cytokinesis of polarized cortical stem cells and cerebral cortex size.		Pubmed	7.76e-06	0.149	0.000237	0.00247	3	13	KIF23,KIF20A,AURKB
Pubmed	25666610	WD repeat-containing protein 5 (WDR5) localizes to the midbody and regulates abscission.		Pubmed	7.76e-06	0.149	0.000237	0.00247	3	13	KIF23,PRC1,CEP55
Pubmed	7739547	Novel INK4 proteins, p19 and p18, are specific inhibitors of the cyclin D-dependent kinases CDK4 and CDK6.		Pubmed	7.76e-06	0.149	0.000237	0.00247	3	13	CCNA2,CCNE2,CDK1
Pubmed	25450615	Redox regulation of cardiomyocyte cell cycling via an ERK1/2 and c-Myc-dependent activation of cyclin D2 transcription.		Pubmed	7.76e-06	0.149	0.000237	0.00247	3	13	CCNA2,CDK1,CDC6
Pubmed	32786267	Identification of SUMO Binding Proteins Enriched after Covalent Photo-Cross-Linking.		Pubmed	8.82e-06	0.169	0.000237	0.00247	8	332	KIF23,KIF4A,PRC1,NCAPG,TPX2,TOP2A,KIF11,KIF2C
Pubmed	31239290	Targeted and Interactome Proteomics Revealed the Role of PHD2 in Regulating BRD4 Proline Hydroxylation.		Pubmed	9.06e-06	0.174	0.000237	0.00247	9	441	DLGAP5,KIF4A,MCM2,TUBB2B,KIF20A,LMNB1,CDK1,TOP2A,KIF11
Pubmed	18383837	Overexpression of the mitotic spindle assembly checkpoint genes hBUB1, hBUBR1 and hMAD2 in thyroid carcinomas with aggressive nature.		Pubmed	9.27e-06	0.178	0.000237	0.00247	2	2	BUB1,MAD2L1
Pubmed	24654460	Expression of budding uninhibited by benzimidazoles-1 and mitotic arrest deficient-2 in endometrial carcinoma and its significance.		Pubmed	9.27e-06	0.178	0.000237	0.00247	2	2	BUB1,MAD2L1
Pubmed	21646403	Bub1 overexpression induces aneuploidy and tumor formation through Aurora B kinase hyperactivation.		Pubmed	9.27e-06	0.178	0.000237	0.00247	2	2	BUB1,AURKB
Pubmed	19221029	Cyclin A-Cdk1 regulates the origin firing program in mammalian cells.		Pubmed	9.27e-06	0.178	0.000237	0.00247	2	2	CCNA2,CDK1
Pubmed	21525341	Human herpesvirus 6 suppresses T cell proliferation through induction of cell cycle arrest in infected cells in the G2/M phase.		Pubmed	9.27e-06	0.178	0.000237	0.00247	2	2	CCNB1,CDK1
Pubmed	31359594	Aurora kinase A stabilizes FOXM1 to enhance paclitaxel resistance in triple-negative breast cancer.		Pubmed	9.27e-06	0.178	0.000237	0.00247	2	2	FOXM1,AURKA
Pubmed	25882311	Daurinol Enhances the Efficacy of Radiotherapy in Lung Cancer via Suppression of Aurora Kinase A/B Expression.		Pubmed	9.27e-06	0.178	0.000237	0.00247	2	2	AURKA,AURKB
Pubmed	19344781	Host cell-specific effects of lentiviral accessory proteins on the eukaryotic cell cycle progression.		Pubmed	9.27e-06	0.178	0.000237	0.00247	2	2	CCNB1,CDK1
Pubmed	23114921	Aurora B expression in metastatic effusions from advanced-stage ovarian serous carcinoma is predictive of intrinsic chemotherapy resistance.		Pubmed	9.27e-06	0.178	0.000237	0.00247	2	2	AURKA,AURKB
Pubmed	19801554	A cancer-associated aurora A mutant is mislocalized and misregulated due to loss of interaction with TPX2.		Pubmed	9.27e-06	0.178	0.000237	0.00247	2	2	AURKA,TPX2
Pubmed	15182668	Spindle checkpoint protein dynamics at kinetochores in living cells.		Pubmed	9.27e-06	0.178	0.000237	0.00247	2	2	CDC20,MAD2L1
Pubmed	22099307	Aurora-B mediated ATM serine 1403 phosphorylation is required for mitotic ATM activation and the spindle checkpoint.		Pubmed	9.27e-06	0.178	0.000237	0.00247	2	2	BUB1,AURKB
Pubmed	20237434	The interaction between mitotic checkpoint proteins, CENP-E and BubR1, is diminished in epothilone B-resistant A549 cells.		Pubmed	9.27e-06	0.178	0.000237	0.00247	2	2	CENPE,BUB1B
Pubmed	23799914	Sulforaphane induced cell cycle arrest in the G2/M phase via the blockade of cyclin B1/CDC2 in human ovarian cancer cells.		Pubmed	9.27e-06	0.178	0.000237	0.00247	2	2	CCNB1,CDK1
Pubmed	29575713	Functional transcriptomic annotation and protein-protein interaction analysis identify EZH2 and UBE2C as key upregulated proteins in ovarian cancer.		Pubmed	9.27e-06	0.178	0.000237	0.00247	2	2	UBE2C,EZH2
Pubmed	22207630	TPX2 and AURKA promote 20q amplicon-driven colorectal adenoma to carcinoma progression.		Pubmed	9.27e-06	0.178	0.000237	0.00247	2	2	AURKA,TPX2
Pubmed	16912073	Validating Aurora B as an anti-cancer drug target.		Pubmed	9.27e-06	0.178	0.000237	0.00247	2	2	AURKA,AURKB
Pubmed	2570636	Isolation of a human cyclin cDNA: evidence for cyclin mRNA and protein regulation in the cell cycle and for interaction with p34cdc2.		Pubmed	9.27e-06	0.178	0.000237	0.00247	2	2	CCNB1,CDK1
Pubmed	21659531	Cyclin-dependent kinase 1 (CDK1)-mediated phosphorylation of enhancer of zeste 2 (Ezh2) regulates its stability.		Pubmed	9.27e-06	0.178	0.000237	0.00247	2	2	EZH2,CDK1
Pubmed	32323809	Identification of lung adenocarcinoma biomarkers based on bioinformatic analysis and human samples.		Pubmed	9.27e-06	0.178	0.000237	0.00247	2	2	AURKA,TOP2A
Pubmed	23092930	Differential expression of AURKA and AURKB genes in bone marrow stromal mesenchymal cells of myelodysplastic syndrome: correlation with G-banding analysis and FISH.		Pubmed	9.27e-06	0.178	0.000237	0.00247	2	2	AURKA,AURKB
Pubmed	15984162	Cell-cycle-dependent subcellular localization of cyclin B1, phosphorylated cyclin B1 and p34cdc2 during oocyte meiotic maturation and fertilization in mouse.		Pubmed	9.27e-06	0.178	0.000237	0.00247	2	2	CCNB1,CDK1
Pubmed	24714775	Expression signature defined by FOXM1-CCNB1 activation predicts disease recurrence in non-muscle-invasive bladder cancer.		Pubmed	9.27e-06	0.178	0.000237	0.00247	2	2	FOXM1,CCNB1
Pubmed	30129654	PCNA-associated factor P15		Pubmed	9.27e-06	0.178	0.000237	0.00247	2	2	FOXM1,PCLAF
Pubmed	24797070	E2F activators signal and maintain centrosome amplification in breast cancer cells.		Pubmed	9.27e-06	0.178	0.000237	0.00247	2	2	NEK2,PLK4
Pubmed	11389834	Emi1 is a mitotic regulator that interacts with Cdc20 and inhibits the anaphase promoting complex.		Pubmed	9.27e-06	0.178	0.000237	0.00247	2	2	FBXO5,CDC20
Pubmed	24656812	Cdk1 coordinates timely activation of MKlp2 kinesin with relocation of the chromosome passenger complex for cytokinesis.		Pubmed	9.27e-06	0.178	0.000237	0.00247	2	2	KIF20A,CDK1
Pubmed	23870126	Marking and measuring single microtubules by PRC1 and kinesin-4.		Pubmed	9.27e-06	0.178	0.000237	0.00247	2	2	KIF4A,PRC1
Pubmed	23738717	An analysis of PLAG1 and HMGA2 rearrangements in salivary duct carcinoma and examination of the role of precursor lesions.		Pubmed	9.27e-06	0.178	0.000237	0.00247	2	2	HMGA2,PLAG1
Pubmed	28114286	FOXM1 recruits nuclear Aurora kinase A to participate in a positive feedback loop essential for the self-renewal of breast cancer stem cells.		Pubmed	9.27e-06	0.178	0.000237	0.00247	2	2	FOXM1,AURKA
Pubmed	23391595	Selective expression of hyaluronan and receptor for hyaluronan mediated motility (Rhamm) in the adult mouse subventricular zone and rostral migratory stream and in ischemic cortex.		Pubmed	9.27e-06	0.178	0.000237	0.00247	2	2	HMMR,HAS2
Pubmed	18247328	Involvement of the role of Chk1 in lithium-induced G2/M phase cell cycle arrest in hepatocellular carcinoma cells.		Pubmed	9.27e-06	0.178	0.000237	0.00247	2	2	CHEK1,CDK1
Pubmed	26600399	Survivin and cyclin E2 genes expression in a cohort of Egyptian acute leukemia patients: Clinical importance and future prospects.		Pubmed	9.27e-06	0.178	0.000237	0.00247	2	2	BIRC5,CCNE2
Pubmed	25288231	Expression of regulators of mitotic fidelity are associated with intercellular heterogeneity and chromosomal instability in primary breast cancer.		Pubmed	9.27e-06	0.178	0.000237	0.00247	2	2	BIRC5,AURKA
Pubmed	11134360	Association between spindle assembly checkpoint expression and maternal age in human oocytes.		Pubmed	9.27e-06	0.178	0.000237	0.00247	2	2	BUB1,MAD2L1
Pubmed	11792804	Kinetochore localisation and phosphorylation of the mitotic checkpoint components Bub1 and BubR1 are differentially regulated by spindle events in human cells.		Pubmed	9.27e-06	0.178	0.000237	0.00247	2	2	BUB1,BUB1B
Pubmed	29704495	FOXM1 regulates radiosensitivity of lung cancer cell partly by upregulating KIF20A.		Pubmed	9.27e-06	0.178	0.000237	0.00247	2	2	FOXM1,KIF20A
Pubmed	15987997	Phosphorylation and stabilization of HURP by Aurora-A: implication of HURP as a transforming target of Aurora-A.		Pubmed	9.27e-06	0.178	0.000237	0.00247	2	2	DLGAP5,AURKA
Pubmed	29705704	FOXM1 promotes proliferation in human hepatocellular carcinoma cells by transcriptional activation of CCNB1.		Pubmed	9.27e-06	0.178	0.000237	0.00247	2	2	FOXM1,CCNB1
Pubmed	24389189	Nek2 and Plk4: prognostic markers, drivers of breast tumorigenesis and drug resistance.		Pubmed	9.27e-06	0.178	0.000237	0.00247	2	2	NEK2,PLK4
Pubmed	29141582	A novel interaction between kinase activities in regulation of cilia formation.		Pubmed	9.27e-06	0.178	0.000237	0.00247	2	2	AURKA,NEK2
Pubmed	23246960	Genetic instability: tipping the balance.		Pubmed	9.27e-06	0.178	0.000237	0.00247	2	2	BUB1B,MAD2L1
Pubmed	22580043	Critical role of cyclin B1/Cdc2 up-regulation in the induction of mitotic prometaphase arrest in human breast cancer cells treated with 2-methoxyestradiol.		Pubmed	9.27e-06	0.178	0.000237	0.00247	2	2	CCNB1,CDK1
Pubmed	26387954	Predicting Drug Response in Human Prostate Cancer from Preclinical Analysis of In Vivo Mouse Models.		Pubmed	9.27e-06	0.178	0.000237	0.00247	2	2	FOXM1,CENPF
Pubmed	19837665	Novel positive feedback loop between Cdk1 and Chk1 in the nucleus during G2/M transition.		Pubmed	9.27e-06	0.178	0.000237	0.00247	2	2	CHEK1,CDK1
Pubmed	22159225	Aurora B confers cancer cell resistance to TRAIL-induced apoptosis via phosphorylation of survivin.		Pubmed	9.27e-06	0.178	0.000237	0.00247	2	2	BIRC5,AURKB
Pubmed	18753610	Metaphase I arrest in LT/Sv mouse oocytes involves the spindle assembly checkpoint.		Pubmed	9.27e-06	0.178	0.000237	0.00247	2	2	BUB1,MAD2L1
Pubmed	28899973	TOP2A and EZH2 Provide Early Detection of an Aggressive Prostate Cancer Subgroup.		Pubmed	9.27e-06	0.178	0.000237	0.00247	2	2	EZH2,TOP2A
Pubmed	18321990	Aurora A regulates the activity of HURP by controlling the accessibility of its microtubule-binding domain.		Pubmed	9.27e-06	0.178	0.000237	0.00247	2	2	DLGAP5,AURKA
Pubmed	28260026	UBE2C induces EMT through Wnt/??catenin and PI3K/Akt signaling pathways by regulating phosphorylation levels of Aurora-A.		Pubmed	9.27e-06	0.178	0.000237	0.00247	2	2	UBE2C,AURKA
Pubmed	10559244	Activation of the mitogen-activated protein kinase ERK1 during meiotic progression of mouse pachytene spermatocytes.		Pubmed	9.27e-06	0.178	0.000237	0.00247	2	2	CCNB1,CDK1
Pubmed	29212856	Tamoxifen Resistance in Breast Cancer Is Regulated by the EZH2-ER?-GREB1 Transcriptional Axis.		Pubmed	9.27e-06	0.178	0.000237	0.00247	2	2	EZH2,GREB1
Pubmed	28525379	PDZ binding kinase, regulated by FoxM1, enhances malignant phenotype via activation of ?-Catenin signaling in hepatocellular carcinoma.		Pubmed	9.27e-06	0.178	0.000237	0.00247	2	2	FOXM1,PBK
Pubmed	30576375	Cdk1-dependent phosphorylation of KIF4A at S1186 triggers lateral chromosome compaction during early mitosis.		Pubmed	9.27e-06	0.178	0.000237	0.00247	2	2	KIF4A,CDK1
Pubmed	24630889	MCM2/TOP2A (ProExC) immunohistochemistry as a predictive marker in head and neck mucosal biopsies.		Pubmed	9.27e-06	0.178	0.000237	0.00247	2	2	MCM2,TOP2A
Pubmed	26733216	NuSAP modulates the dynamics of kinetochore microtubules by attenuating MCAK depolymerisation activity.		Pubmed	9.27e-06	0.178	0.000237	0.00247	2	2	NUSAP1,KIF2C
Pubmed	27117522	Oxidative stress-induced DNA damage of mouse zygotes triggers G2/M checkpoint and phosphorylates Cdc25 and Cdc2.		Pubmed	9.27e-06	0.178	0.000237	0.00247	2	2	CDK1,CDC25C
Pubmed	25807528	Deregulated expression of Aurora kinases is not a prognostic biomarker in papillary thyroid cancer patients.		Pubmed	9.27e-06	0.178	0.000237	0.00247	2	2	AURKA,AURKB
Pubmed	22222631	An integrated genomic approach to identify predictive biomarkers of response to the aurora kinase inhibitor PF-03814735.		Pubmed	9.27e-06	0.178	0.000237	0.00247	2	2	AURKA,AURKB
Pubmed	19015317	Phosphorylation sites in BubR1 that regulate kinetochore attachment, tension, and mitotic exit.		Pubmed	9.27e-06	0.178	0.000237	0.00247	2	2	TTK,BUB1B
Pubmed	18272572	The interaction of herpes simplex virus 1 regulatory protein ICP22 with the cdc25C phosphatase is enabled in vitro by viral protein kinases US3 and UL13.		Pubmed	9.27e-06	0.178	0.000237	0.00247	2	2	CDK1,CDC25C
Pubmed	30481564	Cyclin B1/CDK1-regulated mitochondrial bioenergetics in cell cycle progression and tumor resistance.		Pubmed	9.27e-06	0.178	0.000237	0.00247	2	2	CCNB1,CDK1
Pubmed	22801780	CENP-E--dependent BubR1 autophosphorylation enhances chromosome alignment and the mitotic checkpoint.		Pubmed	9.27e-06	0.178	0.000237	0.00247	2	2	CENPE,BUB1B
Pubmed	18272575	Role of cellular phosphatase cdc25C in herpes simplex virus 1 replication.		Pubmed	9.27e-06	0.178	0.000237	0.00247	2	2	CDK1,CDC25C
Pubmed	28972102	Plk4 and Aurora A cooperate in the initiation of acentriolar spindle assembly in mammalian oocytes.		Pubmed	9.27e-06	0.178	0.000237	0.00247	2	2	AURKA,PLK4
Pubmed	23569217	A TPR domain-containing N-terminal module of MPS1 is required for its kinetochore localization by Aurora B.		Pubmed	9.27e-06	0.178	0.000237	0.00247	2	2	TTK,AURKB
Pubmed	32439164	5'-UTR and ORF elements, as well as the 3'-UTR regulate the translation of Cyclin.		Pubmed	9.27e-06	0.178	0.000237	0.00247	2	2	CCNB1,CCNB2
Pubmed	11413462	Mitotic kinases as regulators of cell division and its checkpoints.		Pubmed	9.27e-06	0.178	0.000237	0.00247	2	2	AURKA,AURKB
Pubmed	20368358	Functional and spatial regulation of mitotic centromere-associated kinesin by cyclin-dependent kinase 1.		Pubmed	9.27e-06	0.178	0.000237	0.00247	2	2	CDK1,KIF2C
Pubmed	23750214	Targeting Aurora B to the equatorial cortex by MKlp2 is required for cytokinesis.		Pubmed	9.27e-06	0.178	0.000237	0.00247	2	2	KIF20A,AURKB
Pubmed	30527357	Correlation between EZH2 and CEP55 and lung adenocarcinoma prognosis.		Pubmed	9.27e-06	0.178	0.000237	0.00247	2	2	EZH2,CEP55
Pubmed	19148505	Expression of TPX2 in salivary gland carcinomas.		Pubmed	9.27e-06	0.178	0.000237	0.00247	2	2	HMMR,TPX2
Pubmed	20404109	Activation of cyclin B1-Cdk1 synchronizes events in the nucleus and the cytoplasm at mitosis.		Pubmed	9.27e-06	0.178	0.000237	0.00247	2	2	CCNB1,CDK1
Pubmed	16080195	Analysis of Aurora-A and hMPS1 mitotic kinases in mantle cell lymphoma.		Pubmed	9.27e-06	0.178	0.000237	0.00247	2	2	TTK,AURKA
Pubmed	10523496	Aurora/Ipl1p-related kinases, a new oncogenic family of mitotic serine-threonine kinases.		Pubmed	9.27e-06	0.178	0.000237	0.00247	2	2	AURKA,AURKB
[truncated: 27,031 more rows]
[truncated: 3 more columns]
